# Supplementary material for: Response of Multiple Tissues to Drought Revealed by a Weighted Gene Co-Expression Network Analysis in Foxtail Millet [Setaria italica (L.) P. Beauv.]
Source: Front Plant Sci. 2022 Jan 12;12:746166. doi: 10.3389/fpls.2021.746166 (PMC8790073; doi:10.3389/fpls.2021.746166)
Supplement: Supplementary Table S1 — Quality evaluation of RNA-seq raw data. [file Table_1.XLSX]

## Sheet: Supplementary Table S1
Supplementary Table S1: Quality evaluation of RNA-seq raw data
SampleID	Clean reads	Clean bases	GC Content	%≥Q30	Mapped Reads	Uniq Mapped Reads	Multiple Map Reads	Reads Map to '+'	Reads Map to '-'
NO_Ci134_Leaf1	47898430	7184764500	0.5931	0.9148	44,139,165 (92.15%)	43,198,321 (90.19%)	940,844 (1.96%)	21,931,304 (45.79%)	22,068,320 (46.07%)
NO_Ci134_Leaf2	43064758	6459713700	0.5909	0.9181	39,951,185 (92.77%)	38,723,927 (89.92%)	1,227,258 (2.85%)	19,859,018 (46.11%)	19,979,895 (46.40%)
NO_Ci134_Leaf3	55681584	8352237600	0.6073	0.9331	49,064,557 (88.12%)	47,959,123 (86.13%)	1,105,434 (1.99%)	24,355,773 (43.74%)	24,560,455 (44.11%)
NO_Ci134_Root1	46717630	7007644500	0.5854	0.9186	40,271,158 (86.20%)	39,532,430 (84.62%)	738,728 (1.58%)	20,057,736 (42.93%)	20,085,688 (42.99%)
NO_Ci134_Root2	42142742	6321411300	0.565	0.917	34,363,362 (81.54%)	33,836,266 (80.29%)	527,096 (1.25%)	17,117,745 (40.62%)	17,153,925 (40.70%)
NO_Ci134_Root3	45402876	6810431400	0.6114	0.9359	37,888,163 (83.45%)	37,154,694 (81.83%)	733,469 (1.62%)	18,883,476 (41.59%)	18,886,471 (41.60%)
NO_Ci134_Stem1	42079410	6311911500	0.5794	0.9074	38,392,391 (91.24%)	37,884,277 (90.03%)	508,114 (1.21%)	19,090,222 (45.37%)	19,238,940 (45.72%)
NO_Ci134_Stem2	40753530	6113029500	0.5909	0.8785	37,185,704 (91.25%)	36,747,430 (90.17%)	438,274 (1.08%)	18,541,378 (45.50%)	18,591,708 (45.62%)
NO_Ci134_Stem3	47474550	7121182500	0.5885	0.9336	42,374,749 (89.26%)	41,707,521 (87.85%)	667,228 (1.41%)	21,126,865 (44.50%)	21,148,612 (44.55%)
NO_Ci328_Leaf1	40745010	6111751500	0.5825	0.8901	36,468,833 (89.51%)	35,738,938 (87.71%)	729,895 (1.79%)	18,113,577 (44.46%)	18,264,302 (44.83%)
NO_Ci328_Leaf2	39607704	5941155600	0.5788	0.8883	35,368,595 (89.30%)	34,706,504 (87.63%)	662,091 (1.67%)	17,563,897 (44.34%)	17,711,139 (44.72%)
NO_Ci328_Leaf3	40603716	6090557400	0.5922	0.8966	36,394,498 (89.63%)	35,689,033 (87.90%)	705,465 (1.74%)	18,081,971 (44.53%)	18,221,275 (44.88%)
NO_Ci328_Root1	43639200	6545880000	0.5768	0.8961	35,850,103 (82.15%)	35,132,521 (80.51%)	717,582 (1.64%)	17,830,289 (40.86%)	17,916,612 (41.06%)
NO_Ci328_Root2	44584496	6687674400	0.5918	0.9133	38,639,450 (86.67%)	37,885,930 (84.98%)	753,520 (1.69%)	19,227,131 (43.13%)	19,301,457 (43.29%)
NO_Ci328_Root3	47616060	7142409000	0.595	0.8948	40,679,305 (85.43%)	39,904,972 (83.81%)	774,333 (1.63%)	20,212,919 (42.45%)	20,341,711 (42.72%)
NO_Ci328_Stem1	37640570	5646085500	0.5725	0.8901	33,644,274 (89.38%)	32,973,004 (87.60%)	671,270 (1.78%)	16,725,524 (44.43%)	16,829,390 (44.71%)
NO_Ci328_Stem2	47456198	7118429700	0.568	0.9029	42,846,674 (90.29%)	42,056,748 (88.62%)	789,926 (1.66%)	21,297,471 (44.88%)	21,423,313 (45.14%)
NO_Ci328_Stem3	39201150	5880172500	0.5808	0.897	35,363,138 (90.21%)	34,888,245 (89.00%)	474,893 (1.21%)	17,634,610 (44.98%)	17,660,866 (45.05%)
NO_Ci409_Leaf1	47484996	7122749400	0.5946	0.9314	44,764,636 (94.27%)	43,791,066 (92.22%)	973,570 (2.05%)	22,238,881 (46.83%)	22,379,406 (47.13%)
NO_Ci409_Leaf2	52879074	7931861100	0.601	0.9256	49,453,116 (93.52%)	48,521,333 (91.76%)	931,783 (1.76%)	24,560,839 (46.45%)	24,725,928 (46.76%)
NO_Ci409_Leaf3	40005904	6000885600	0.5878	0.9249	37,654,193 (94.12%)	36,855,679 (92.13%)	798,514 (2.00%)	18,710,951 (46.77%)	18,839,544 (47.09%)
NO_Ci409_Root1	55255326	8288298900	0.5898	0.9022	49,054,692 (88.78%)	48,018,208 (86.90%)	1,036,484 (1.88%)	24,401,889 (44.16%)	24,496,705 (44.33%)
NO_Ci409_Root2	59052854	8857928100	0.5971	0.9292	53,384,472 (90.40%)	52,295,051 (88.56%)	1,089,421 (1.84%)	26,574,712 (45.00%)	26,634,251 (45.10%)
NO_Ci409_Root3	59690076	8953511400	0.5949	0.924	53,414,753 (89.49%)	52,212,117 (87.47%)	1,202,636 (2.01%)	26,571,234 (44.52%)	26,640,648 (44.63%)
NO_Ci409_Stem1	43861822	6579273300	0.586	0.9329	41,088,392 (93.68%)	40,123,980 (91.48%)	964,412 (2.20%)	20,345,497 (46.39%)	20,394,137 (46.50%)
NO_Ci409_Stem2	48621464	7293219600	0.5908	0.9263	45,710,412 (94.01%)	44,937,154 (92.42%)	773,258 (1.59%)	22,768,495 (46.83%)	22,805,852 (46.90%)
NO_Ci409_Stem3	49506274	7425941100	0.5833	0.9337	46,521,774 (93.97%)	45,640,974 (92.19%)	880,800 (1.78%)	23,115,470 (46.69%)	23,148,469 (46.76%)
NO_Ci603_Leaf1	47948598	7192289700	0.5893	0.9142	43,896,899 (91.55%)	42,850,051 (89.37%)	1,046,848 (2.18%)	21,784,913 (45.43%)	21,932,795 (45.74%)
NO_Ci603_Leaf2	49762692	7464403800	0.5925	0.8968	46,185,278 (92.81%)	45,315,201 (91.06%)	870,077 (1.75%)	22,916,002 (46.05%)	23,095,917 (46.41%)
NO_Ci603_Leaf3	41923886	6288582900	0.5873	0.9283	38,953,671 (92.92%)	37,982,940 (90.60%)	970,731 (2.32%)	19,344,682 (46.14%)	19,470,593 (46.44%)
NO_Ci603_Root1	53518524	8027778600	0.589	0.9333	46,698,650 (87.26%)	45,758,688 (85.50%)	939,962 (1.76%)	23,200,929 (43.35%)	23,263,289 (43.47%)
NO_Ci603_Root2	55936208	8390431200	0.5968	0.929	48,697,493 (87.06%)	47,752,282 (85.37%)	945,211 (1.69%)	24,179,411 (43.23%)	24,264,061 (43.38%)
NO_Ci603_Root3	44635510	6695326500	0.5834	0.9318	39,029,529 (87.44%)	38,248,666 (85.69%)	780,863 (1.75%)	19,384,312 (43.43%)	19,445,793 (43.57%)
NO_Ci603_Stem1	51020574	7653086100	0.5868	0.9305	47,506,007 (93.11%)	46,773,273 (91.68%)	732,734 (1.44%)	23,659,955 (46.37%)	23,672,693 (46.40%)
NO_Ci603_Stem2	49792066	7468809900	0.589	0.9316	46,277,677 (92.94%)	45,562,222 (91.50%)	715,455 (1.44%)	23,031,515 (46.26%)	23,054,410 (46.30%)
NO_Ci603_Stem3	56166470	8424970500	0.5795	0.9284	51,806,485 (92.24%)	50,869,956 (90.57%)	936,529 (1.67%)	25,775,001 (45.89%)	25,819,939 (45.97%)
DR_Ci134_Leaf1	37945490	5691823500	0.5736	0.8919	34,086,805 (89.83%)	33,459,598 (88.18%)	627,207 (1.65%)	16,961,532 (44.70%)	17,047,059 (44.93%)
DR_Ci134_Leaf2	31464906	4719735900	0.5734	0.8981	28,495,214 (90.56%)	27,719,503 (88.10%)	775,711 (2.47%)	14,178,143 (45.06%)	14,255,384 (45.31%)
DR_Ci134_Leaf3	49307840	7396176000	0.5958	0.9377	43,846,265 (88.92%)	42,568,675 (86.33%)	1,277,590 (2.59%)	21,788,684 (44.19%)	21,934,137 (44.48%)
DR_Ci134_Root1	39234008	5885101200	0.5814	0.9164	34,778,384 (88.64%)	34,205,751 (87.18%)	572,633 (1.46%)	17,308,616 (44.12%)	17,371,826 (44.28%)
DR_Ci134_Root2	41776106	6266415900	0.5688	0.8661	34,105,584 (81.64%)	33,588,519 (80.40%)	517,065 (1.24%)	16,955,569 (40.59%)	17,056,031 (40.83%)
DR_Ci134_Root3	62894278	9434141700	0.6309	0.9312	52,600,791 (83.63%)	51,702,718 (82.21%)	898,073 (1.43%)	26,177,456 (41.62%)	26,255,882 (41.75%)
DR_Ci134_Stem1	42287898	6343184700	0.5468	0.9	37,632,123 (88.99%)	36,228,594 (85.67%)	1,403,529 (3.32%)	18,665,710 (44.14%)	18,819,374 (44.50%)
DR_Ci134_Stem2	39128816	5869322400	0.5826	0.884	31,968,666 (81.70%)	31,300,738 (79.99%)	667,928 (1.71%)	15,877,201 (40.58%)	16,005,738 (40.91%)
DR_Ci134_Stem3	40198866	6029829900	0.5979	0.9382	35,685,403 (88.77%)	34,895,024 (86.81%)	790,379 (1.97%)	17,771,521 (44.21%)	17,821,551 (44.33%)
DR_Ci328_Leaf1	48174568	7226185200	0.58	0.8858	43,016,359 (89.29%)	41,884,986 (86.94%)	1,131,373 (2.35%)	21,348,075 (44.31%)	21,558,674 (44.75%)
DR_Ci328_Leaf2	44359314	6653897100	0.5794	0.8924	39,919,697 (89.99%)	38,997,713 (87.91%)	921,984 (2.08%)	19,822,030 (44.69%)	20,001,159 (45.09%)
DR_Ci328_Leaf3	43166216	6474932400	0.5768	0.8861	38,572,157 (89.36%)	37,839,750 (87.66%)	732,407 (1.70%)	19,146,669 (44.36%)	19,333,118 (44.79%)
DR_Ci328_Root1	45487044	6823056600	0.5847	0.8965	38,268,846 (84.13%)	37,564,425 (82.58%)	704,421 (1.55%)	18,961,679 (41.69%)	19,197,986 (42.21%)
DR_Ci328_Root2	46202432	6930364800	0.5837	0.8943	38,770,919 (83.92%)	38,117,593 (82.50%)	653,326 (1.41%)	19,224,526 (41.61%)	19,439,485 (42.07%)
DR_Ci328_Root3	48260248	7239037200	0.5812	0.9038	41,162,512 (85.29%)	40,403,789 (83.72%)	758,723 (1.57%)	20,404,440 (42.28%)	20,635,188 (42.76%)
DR_Ci328_Stem1	45872622	6880893300	0.5836	0.893	40,964,102 (89.30%)	40,072,650 (87.36%)	891,452 (1.94%)	20,335,548 (44.33%)	20,515,541 (44.72%)
DR_Ci328_Stem2	41583780	6237567000	0.581	0.8944	37,546,692 (90.29%)	36,965,025 (88.89%)	581,667 (1.40%)	18,687,233 (44.94%)	18,773,716 (45.15%)
DR_Ci328_Stem3	47114758	7067213700	0.5787	0.8968	42,384,476 (89.96%)	41,656,915 (88.42%)	727,561 (1.54%)	21,075,178 (44.73%)	21,193,770 (44.98%)
DR_Ci409_Leaf1	44333244	6649986600	0.5813	0.9239	41,622,575 (93.89%)	40,665,392 (91.73%)	957,183 (2.16%)	20,680,175 (46.65%)	20,802,019 (46.92%)
DR_Ci409_Leaf2	55600724	8340108600	0.5787	0.9286	52,304,600 (94.07%)	51,111,984 (91.93%)	1,192,616 (2.14%)	25,995,122 (46.75%)	26,135,727 (47.01%)
DR_Ci409_Leaf3	44799928	6719989200	0.5715	0.923	42,237,238 (94.28%)	41,100,112 (91.74%)	1,137,126 (2.54%)	20,990,251 (46.85%)	21,110,331 (47.12%)
DR_Ci409_Root1	47579552	7136932800	0.59	0.928	42,646,824 (89.63%)	41,880,621 (88.02%)	766,203 (1.61%)	21,214,288 (44.59%)	21,293,406 (44.75%)
DR_Ci409_Root2	58278986	8741847900	0.5872	0.9281	51,108,452 (87.70%)	50,146,560 (86.05%)	961,892 (1.65%)	25,431,092 (43.64%)	25,509,531 (43.77%)
DR_Ci409_Root3	43732078	6559811700	0.5888	0.9285	38,001,283 (86.90%)	37,307,899 (85.31%)	693,384 (1.59%)	18,910,056 (43.24%)	18,967,045 (43.37%)
DR_Ci409_Stem1	49001122	7350168300	0.585	0.9291	45,990,534 (93.86%)	45,173,278 (92.19%)	817,256 (1.67%)	22,893,239 (46.72%)	22,946,602 (46.83%)
DR_Ci409_Stem2	55782606	8367390900	0.582	0.9275	52,267,276 (93.70%)	51,244,885 (91.87%)	1,022,391 (1.83%)	26,012,296 (46.63%)	26,091,911 (46.77%)
DR_Ci409_Stem3	47638884	7145832600	0.5787	0.9248	44,734,488 (93.90%)	43,359,352 (91.02%)	1,375,136 (2.89%)	22,194,475 (46.59%)	22,296,064 (46.80%)
DR_Ci603_Leaf1	46487750	6973162500	0.5828	0.9297	43,388,372 (93.33%)	41,915,125 (90.16%)	1,473,247 (3.17%)	21,580,280 (46.42%)	21,659,512 (46.59%)
DR_Ci603_Leaf2	53020452	7953067800	0.5742	0.9238	49,129,931 (92.66%)	48,017,881 (90.56%)	1,112,050 (2.10%)	24,410,082 (46.04%)	24,529,300 (46.26%)
DR_Ci603_Leaf3	45760892	6864133800	0.5693	0.9274	42,573,807 (93.04%)	41,328,709 (90.31%)	1,245,098 (2.72%)	21,161,531 (46.24%)	21,267,269 (46.47%)
DR_Ci603_Root1	47403652	7110547800	0.5873	0.9299	42,638,746 (89.95%)	41,810,088 (88.20%)	828,658 (1.75%)	21,166,885 (44.65%)	21,249,777 (44.83%)
DR_Ci603_Root2	47828446	7174266900	0.5912	0.928	42,955,565 (89.81%)	42,118,321 (88.06%)	837,244 (1.75%)	21,323,741 (44.58%)	21,413,816 (44.77%)
DR_Ci603_Root3	44146108	6621916200	0.582	0.9268	39,971,563 (90.54%)	39,232,305 (88.87%)	739,258 (1.67%)	19,853,102 (44.97%)	19,927,444 (45.14%)
DR_Ci603_Stem1	44367484	6655122600	0.5702	0.9329	41,477,552 (93.49%)	40,682,819 (91.70%)	794,733 (1.79%)	20,634,486 (46.51%)	20,669,103 (46.59%)
DR_Ci603_Stem2	48070702	7210605300	0.5771	0.9276	44,562,436 (92.70%)	43,679,824 (90.87%)	882,612 (1.84%)	22,146,313 (46.07%)	22,207,245 (46.20%)
DR_Ci603_Stem3	48082740	7212411000	0.575	0.9319	44,950,847 (93.49%)	44,132,093 (91.78%)	818,754 (1.70%)	22,354,356 (46.49%)	22,407,398 (46.60%)
Note:
NO: Normal condition; DR: drought condition.
