# Supplementary material for: Response of Multiple Tissues to Drought Revealed by a Weighted Gene Co-Expression Network Analysis in Foxtail Millet [Setaria italica (L.) P. Beauv.]
Source: Front Plant Sci. 2022 Jan 12;12:746166. doi: 10.3389/fpls.2021.746166 (PMC8790073; doi:10.3389/fpls.2021.746166)
Supplement: Supplementary Table S2 — FPKMs for all annotated genes identified in this trial. [file Table_2.XLSX]

## Sheet: Supplementary Table S2
Supplementary Table S2: FPKMs for all annotated genes identified in this trial
GeneID	NO_Ci603_Stem1	NO_Ci603_Stem2	NO_Ci603_Stem3	DR_Ci603_Stem1	DR_Ci603_Stem2	DR_Ci603_Stem3	NO_Ci134_Leaf1	NO_Ci134_Leaf2	NO_Ci134_Leaf3	NO_Ci134_Root1	NO_Ci134_Root2	NO_Ci134_Root3	NO_Ci134_Stem1	NO_Ci134_Stem2	NO_Ci134_Stem3	NO_Ci328_Leaf1	NO_Ci328_Leaf2	NO_Ci328_Leaf3	NO_Ci328_Root1	NO_Ci328_Root2	NO_Ci328_Root3	NO_Ci328_Stem1	NO_Ci328_Stem2	NO_Ci328_Stem3	DR_Ci134_Leaf1	DR_Ci134_Leaf2	DR_Ci134_Leaf3	DR_Ci134_Root1	DR_Ci134_Root2	DR_Ci134_Root3	DR_Ci134_Stem1	DR_Ci134_Stem2	DR_Ci134_Stem3	DR_Ci328_Leaf1	DR_Ci328_Leaf2	DR_Ci328_Leaf3	DR_Ci328_Root1	DR_Ci328_Root2	DR_Ci328_Root3	DR_Ci328_Stem1	DR_Ci328_Stem2	DR_Ci328_Stem3	NO_Ci409_Leaf1	NO_Ci409_Leaf2	NO_Ci409_Leaf3	NO_Ci409_Root1	NO_Ci409_Root2	NO_Ci409_Root3	NO_Ci409_Stem1
Seita.1G000100	0	0.043482	0.022571	0.014072	0.091924	0.012206	0.743504	0.52127	0.393912	0	0	0.046042	0	0	0.013767	1.07268	0.803224	1.00825	0.080067	0.193818	0.196186	0	0.078709	0.014667	0.772728	0.720071	1.51999	0	0.017137	0	0	0	0	0.741742	1.19828	0.61667	0.161851	0.202581	0.102376	0	0.046474	0	1.30163	0.527299	0.200508	0.149784	0.19614	0.065306	0.007089
Seita.1G000200	172.899	148.65	148.331	161.65	192.139	185.153	594.713	650.349	506.104	6.76975	4.70668	4.69609	122.109	120.039	115.899	713.779	646.039	650.722	3.94402	5.25267	4.98908	111.86	110.061	113.666	689.605	660.939	495.757	7.68322	8.59927	6.51603	56.3543	70.0686	118.928	483.315	544.115	472.292	8.13018	4.94478	3.95129	69.5665	143.971	106.547	533.951	642.621	594.361	3.59727	3.93072	2.86294	87.9852
Seita.1G000300	27.1727	19.099	16.8503	13.0427	26.5635	9.9692	74.22	42.1345	19.5686	5.28969	4.44151	3.68347	2.04823	24.6313	13.0301	19.7232	73.0471	20.4506	6.42604	4.13108	9.29467	2.9383	8.67907	12.7874	13.2455	29.5764	53.7735	3.77219	4.25157	3.41756	4.08812	11.1539	9.89282	39.6732	15.6615	43.2392	2.58391	2.17163	2.55334	6.74118	24.0995	15.1592	29.1185	24.1735	22.0996	3.91301	3.82485	6.59909	3.69694
Seita.1G000400	76.4972	86.0851	98.8324	114.671	142.067	129.917	79.6384	66.7441	132.115	94.6743	80.7402	151.475	49.3103	45.862	127.493	81.792	75.0638	84.6609	92.8155	101.451	85.7779	159.782	132.223	66.0205	92.4996	99.082	157.577	182.747	160.894	260.177	124.699	242.88	303.447	145.352	124.622	143	214.664	226.205	225.388	221.185	141.362	171.039	70.5102	74.4968	76.9623	117.22	110.467	94.9187	122.209
Seita.1G000500	35.9257	32.3896	34.6603	38.3228	35.1846	40.2693	39.0974	35.3207	35.2615	47.6978	57.2512	42.4342	47.8553	45.6992	40.5428	39.1511	40.277	36.257	43.0067	37.8082	34.3305	49.0324	42.9078	41.0893	48.9071	43.9402	38.2418	55.7266	56.8233	45.3376	91.0427	62.7992	43.0698	44.7813	47.3776	45.7195	60.4281	62.6707	61.8028	74.3922	62.6481	65.1322	26.0141	27.2755	27.1296	30.3638	27.2758	28.2662	26.3429
Seita.1G000700	0.107003	0.27643	0.129597	0	0.038714	0.068557	1.07685	1.80738	2.04797	1.35227	0.18056	1.52651	0.178529	0.275937	0.020303	0.779575	0.479644	0.258326	0.281636	0.978496	0.166834	0	0	0.039386	6.72679	5.78608	2.7545	0.395775	0.33411	0.698039	0.244922	0.215175	0	0.778899	1.13559	1.05404	0.090043	0.130396	0.075803	0.205734	0	0.081175	0.510962	0.831114	0.516467	0.603904	1.35576	0.418683	0.180802
Seita.1G000800	1.74673	1.85625	1.99086	1.26361	1.66667	2.03659	1.49673	1.96219	2.81056	1.20312	1.57247	1.50985	0.714556	1.15865	2.61699	2.92667	1.82947	1.85506	0.930489	0.993832	1.04172	2.08831	2.87116	1.22386	1.24352	1.90171	1.86324	2.3087	1.4622	1.31143	3.45172	2.11176	1.84618	1.43481	1.39144	1.89691	1.22002	0.940013	0.868362	2.82552	1.17012	1.28753	1.8871	1.89606	1.65898	0.825411	0.621975	0.677664	1.20074
Seita.1G001000	0	0	0	0	0	0	0	0	0	0	0	0	0	0	0	0	0	0	0	0	0	0	0	0	0	0	0	0	0	0	0	0	0	0	0	0	0	0	0.06675	0	0	0	0	0	0	0	0	0	0
Seita.1G001100	44.0597	48.4989	40.7472	66.769	54.4594	72.8356	13.4594	10.681	18.1879	34.4558	35.9766	40.1932	10.5416	10.5472	25.8172	7.91451	10.567	13.3127	20.2614	24.6836	25.0628	9.03669	10.6029	12.6272	20.5736	21.8759	26.5393	64.1482	68.0464	63.7821	12.0303	16.6408	46.6352	13.6022	10.3166	22.0245	39.3205	47.699	45.9747	26.9745	27.4522	32.047	4.8587	9.56678	14.9917	24.6638	21.03	20.7729	47.2636
Seita.1G001200	0.495077	3.76895	0.228397	0	1.88482	0	0	0	0	0	0	0	0	0.104951	2.06824	0	0	0	0	0	0	2.39773	2.45043	0.036878	0	0	0	0	0	0.025071	1.29874	0.081932	0.584114	0	0	0	0	0	0	0.318472	0.052194	0.061818	0	0	0	0	0.024476	0	15.4164
Seita.1G001300	57.5811	57.13	63.4015	90.9225	73.5863	93.8352	143.17	149.539	137.841	45.0217	37.7134	9.37817	73.148	60.9364	65.9384	206.675	199.258	206.727	39.127	5.98378	33.8791	72.4128	71.9883	74.3102	116.536	163.833	162.222	45.2447	37.9083	34.5825	53.838	57.4148	66.3594	133.287	152.889	144.192	37.0622	38.4424	39.7597	52.5675	64.1934	52.6339	151.509	160.246	167.333	35.3691	33.782	35.3727	52.8621
Seita.1G001400	0.247778	0.248116	0.199062	0.321304	0.499318	0.27075	0.308387	0.341492	0.472862	0.244504	2.67258	176.267	0.221219	0.236668	0.301953	0.305381	0.288768	0.34113	0.378879	165.519	0.407733	0.273224	0.215978	0.271672	0.567136	0.357475	0.31497	0.281	0.151258	0.379162	0.223369	0.344721	0.492672	0.27732	0.642528	0.288786	0.364586	0.420015	0.413116	0.303219	0.362171	0.330727	0.438214	0.220751	0.432671	0.273046	0.337412	0.386849	0.262177
Seita.1G001500	17.7769	17.3106	22.1179	22.8304	22.0013	19.7847	17.503	15.1699	22.9571	19.1142	15.206	18.8296	13.2374	16.091	22.3953	18.7146	18.5746	16.7519	18.063	17.5137	16.5785	19.6945	22.8699	18.2779	17.0703	15.7143	25.8091	20.218	21.3586	19.2598	18.9193	16.9404	21.4532	20.9826	19.7263	20.9018	23.3786	23.2391	23.5323	14.7815	14.391	17.1115	18.6015	13.7105	19.4129	21.1453	16.2128	17.1268	14.5071
Seita.1G001600	4.9637	4.93133	5.1979	4.72168	7.35167	4.25552	1.86911	1.46944	2.84067	2.9311	2.60224	4.72698	2.49502	2.38837	5.06119	2.97865	3.24714	2.6988	2.87276	2.6907	2.92536	3.91629	4.70565	3.58932	1.27832	2.47541	4.6596	4.49102	4.84511	6.30753	5.83191	4.12665	6.91574	3.52556	3.14506	3.71602	3.52724	4.15018	3.59286	6.26385	3.46248	4.80437	2.19954	1.97104	2.28715	3.03957	2.78663	2.70136	4.21524
Seita.1G001700	0	0	0	0.114937	0.107209	0.03085	0	0	0.02971	0	0	0.041925	0	0	0	0	0	0	0	0	0	0.156429	0	0	0	0.05556	0	0	0	0	0	0	0	0.03689	0.039711	0	0.041558	0	0.096469	0	0	0.073307	0	0	0	0.032372	0.020083	0	0.038603
Seita.1G001800	0.048691	0.492247	0	0.027362	0.052087	0.05153	0	0	0.02362	0.343224	0.127762	0.303292	0.120098	0.031006	0.135305	0.063311	0.081617	0	0	0.103027	0.028365	1.72591	1.1252	0.032576	0.135376	0.038736	0.064964	0.097843	0.068005	0.104088	0.313447	0.090469	0.046149	0.026884	0	0.10492	0	0	0.070303	0.028283	0.030737	0	0	0	0	0.269969	0.255987	0.196708	0.800936
Seita.1G001900	27.0556	38.7864	20.8478	34.4063	62.599	41.1408	6.73614	13.5977	6.74842	2.43912	2.80694	3.76831	69.2296	42.3106	15.8703	20.7349	16.9921	19.6756	2.26513	1.31873	1.40355	41.0393	39.967	91.3869	34.8441	27.1874	27.7335	7.80617	8.48039	4.1965	8.91762	32.5982	61.6636	13.0649	7.93437	9.22823	8.2766	9.72698	6.2476	38.2002	30.7802	36.6691	12.7795	13.2682	17.784	4.64056	5.35721	2.45492	30.608
Seita.1G002000	97.989	96.8377	94.3036	119.762	163.185	138.215	4.4811	5.66274	3.13389	53.3986	57.9586	60.1089	348.524	270.821	84.9926	9.53383	11.1526	9.38935	35.6207	35.6175	36.2171	139.285	154.787	379.196	11.5124	15.9708	8.72387	95.8342	89.303	44.4054	32.0657	88.9015	82.6321	3.04301	1.99918	4.58192	52.0116	60.7376	42.0541	99.2797	62.0706	61.2465	3.82956	5.7844	4.97568	27.7	45.3103	31.3863	72.951
Seita.1G002100	6.23168	9.32671	11.4644	15.5086	10.0324	14.1682	9.61108	8.85677	11.6189	11.4058	12.5807	10.8812	5.42814	5.2508	11.2489	11.0307	10.5254	9.907	10.3227	10.14	8.4282	20.2028	18.2041	7.82748	12.5977	12.5132	13.4801	11.4367	11.9684	10.1518	19.1626	13.8367	12.0524	11.2688	11.2913	12.6237	12.7878	10.8487	10.5203	11.5282	10.6335	10.4052	8.70939	8.17619	9.62793	9.79624	10.2082	9.90859	16.5892
Seita.1G002200	58.4282	53.4021	61.9376	62.9846	65.1728	63.9608	38.3924	32.8682	36.6916	53.5342	52.866	50.4064	51.9657	46.4783	68.7776	26.0751	30.4934	33.4991	39.5539	35.1844	38.073	66.1634	74.5375	50.4795	53.4437	56.5601	59.2208	81.4867	80.8449	69.583	68.8278	85.469	84.1529	58.5862	60.1742	61.3683	76.6422	82.8358	85.4386	74.5478	77.8715	67.5795	31.6602	33.5443	33.9853	41.2631	41.4823	38.502	57.9681
Seita.1G002300	13.9575	15.9513	18.9386	35.8239	28.9704	39.5901	29.2144	31.444	18.518	30.5083	30.6827	20.8774	20.3113	13.7871	10.9151	30.2396	25.6011	28.7722	27.1209	21.0748	22.5255	32.6373	21.5239	24.4611	54.5512	34.7152	28.1974	27.9902	32.3609	25.4668	45.7849	31.881	24.5994	26.8551	31.8039	33.9176	34.5954	30.5644	32.95	35.1455	30.9948	25.6181	14.6484	22.6583	15.6175	16.2125	19.8975	17.0148	17.6937
Seita.1G002400	0	0.016744	0	0	0	0	1.07272	0	0.474321	0.197678	0	0.416255	0.067651	0.234473	0.090389	2.7286	0.228336	0.27064	0.537183	1.07614	0.667242	0.004375	0.535321	0.885031	0.066232	0	0.148664	0	0.046339	0.005251	0	0	0.12623	0.530443	0.170613	3.83791	0.158416	1.41396	1.37228	0.130836	0.111817	0.416622	0.016632	0	0	0	0	0	0
Seita.1G002500	19.0635	24.153	18.5307	16.3147	15.3479	15.8541	6.491	9.42268	6.84931	16.937	23.2891	17.6652	8.99637	9.6119	14.2787	5.85079	10.7036	7.42477	16.2071	14.9057	11.8084	11.6919	10.7566	11.8697	9.33129	11.5508	12.0374	16.2505	10.0654	12.6691	16.4893	13.8482	12.146	11.9059	13.0111	10.347	9.92815	12.2333	9.37701	7.92895	7.11293	5.92156	6.71025	6.26807	7.12626	26.6457	26.3329	25.6853	32.8866
Seita.1G002600	13.6888	15.3548	17.2822	19.9489	15.7367	18.5685	6.59289	4.84754	9.796	14.5108	10.1027	18.6071	8.15665	8.64362	19.0613	7.69021	7.87052	9.09553	14.8606	14.2079	13.2752	13.2981	15.6113	11.3698	6.33903	6.32319	12.0861	12.7249	8.56107	15.3116	7.73481	7.87526	14.8012	9.19224	8.7673	9.68247	12.4156	14.9713	14.4538	8.39803	10.2231	11.4549	5.69666	6.34008	7.90402	14.2509	13.1191	13.5522	17.6708
Seita.1G002700	4.25009	4.2061	5.50289	7.23002	6.73552	7.94461	3.2129	3.39156	4.30474	4.5375	3.32817	2.97713	2.31021	2.17186	5.04372	5.19665	6.30746	5.47764	4.88238	4.46066	4.15707	7.37312	6.75605	4.74444	6.86775	6.66094	8.09787	5.3582	5.41743	4.90025	4.06485	6.74153	7.80956	8.0904	9.1241	8.39726	7.72624	6.22797	7.80416	5.41824	4.93439	6.28704	4.0904	3.05286	4.33284	3.3971	3.12193	2.88612	3.91184
Seita.1G002800	1.27215	1.81509	2.28538	4.01684	5.03099	4.05533	2.46044	2.56569	2.02727	3.48239	3.64774	1.84178	2.12667	1.75689	2.34378	4.07902	3.96967	1.99078	2.81768	1.64144	1.16593	3.8427	4.67437	2.81256	11.7372	11.783	7.08434	10.8517	11.8113	7.76141	5.14001	8.46376	5.42588	6.83727	5.92168	6.70795	9.63588	7.82921	8.67619	9.94924	6.15706	6.55847	2.07933	1.41853	2.09876	1.78767	2.80992	1.83542	0.483918
Seita.1G002900	0.821668	0.814	1.63305	1.38453	0.639518	1.77236	0.073316	0.080948	0.066211	3.43031	8.81602	2.00897	0.965921	1.23798	2.23537	0.126892	0.148864	0.413098	1.74964	2.51114	2.16855	1.93502	2.59065	1.14024	0.001265	0.313642	0.370148	8.67283	12.9121	4.41037	0.259954	0.914648	1.66502	0	0.074634	0.042015	2.65362	2.46252	3.59985	0.454553	0.29094	1.06258	0	0.032678	0	1.50406	1.07677	1.52264	0.682671
Seita.1G003000	1.09326	2.93275	4.09283	0.377802	0.190214	0.597126	0.097489	0.022663	0.073562	3.75872	6.20973	3.22715	1.00826	0.928457	1.80442	0.068903	0.047374	0.027328	1.60619	1.50846	1.35272	0.742688	1.57109	0.115185	0.315429	0.330049	0.019213	6.10845	4.29237	1.46755	0.038489	0.183792	0.194345	0.019506	0.061932	0	0.78272	0.22209	0.92297	0	0.089206	0.03962	0.043169	0.040209	0	1.76383	2.84969	2.85595	3.44752
Seita.1G003100	29.9741	52.1853	33.5554	119.698	73.851	116.823	61.4973	59.8589	49.6588	65.0121	69.2436	50.6862	31.3912	26.1639	33.4531	97.1474	91.1683	88.2587	76.2566	76.7493	71.9307	134.654	108.598	58.8038	132.732	113.529	79.094	63.977	64.0434	48.2074	104.371	66.5972	67.253	121.949	115.944	127.161	62.5792	69.6172	64.8766	73.8013	97.5178	85.8098	53.3852	46.9699	52.5633	58.889	64.2752	53.3496	107.455
Seita.1G003200	82.5418	79.7698	70.882	136.096	137.069	138.974	231.012	214.272	224.554	1.75347	4.4167	2.61084	26.6722	30.8723	63.0787	238.609	251.765	278.871	1.46594	0.996169	1.8991	21.5785	24.1901	40.1203	142.304	172.359	212.136	2.21959	3.41876	2.17061	9.53859	25.6741	57.1846	159.207	195.098	179.815	1.93305	1.2136	1.23366	19.8908	57.1782	46.1171	358.908	214.045	332.904	0.599433	0.75713	1.16738	54.5762
Seita.1G003300	0.3696	0.120261	0.814232	0	0.212201	0.101078	0	0	0	1.14225	1.9585	1.13804	0.031062	0.072176	0.244873	0	0	0	0.19425	0.336021	0.798752	0.213145	0.405099	0.135117	0.137487	0.159777	0.041001	1.21729	1.41538	0.402727	0	0.065392	0	0	0	0	0.031333	0.132496	0.057896	0.036576	0.036106	0.056494	0	0	0	0.32184	0.777644	0.516851	0.263142
Seita.1G003400	0.07937	0.177713	0.092469	0	0.043172	0.042331	0	0	0.138	0.174374	0.429671	0.369281	0.196929	0.373101	0.11904	0.069967	0.070234	0	0	0	0.123089	0.255638	0.190998	0.214566	0	0	0	0.451889	0.988162	0.523919	0	0	0.034599	0	0	0	0.050094	0.049515	0.045477	0	0	0.090421	0.014044	0.025594	0.008457	0	0.03584	0.029724	0.061973
Seita.1G003500	103.607	98.2522	111.733	132.625	119.199	133.242	93.1425	87.5509	71.2048	104.529	130.994	72.4523	148.23	125.294	109.768	75.2335	87.1481	74.1346	91.9619	76.4703	85.6379	100.467	106.87	123.849	117.444	117.283	94.8026	165.754	185.915	95.2808	197.542	192.418	114.275	109.747	99.4271	103.767	143.794	132.17	156.355	126.958	125.137	113.092	20.1474	68.9915	23.4586	67.4075	59.9021	69.3047	42.4825
Seita.1G003600	51.8809	48.3263	46.3403	70.3846	57.1672	63.5681	36.9446	24.9021	39.9407	48.4016	32.1623	41.5816	26.5127	24.9454	49.497	35.5034	30.5164	39.1641	39.9198	39.6543	37.7718	28.435	34.2256	39.9359	18.8623	21.4218	43.3586	57.2213	40.7997	47.411	21.5349	36.8215	49.5506	47.4719	51.0928	50.3392	67.7218	71.1939	72.0403	42.4117	55.8684	49.1324	27.3099	8.58558	31.341	6.55181	9.64406	6.85061	28.2256
Seita.1G003700	2.56569	7.11271	5.22568	3.32746	6.63972	4.02185	6.07624	4.03866	8.07032	2.68695	1.25435	4.01638	3.05034	2.30717	8.12464	6.82518	7.40012	9.0177	0.7745	0.981054	0.782987	14.3807	11.659	2.1407	4.69249	7.32451	11.9978	4.7776	3.53088	11.4569	25.224	9.76827	13.3399	6.18842	7.56206	6.48179	3.56257	3.52665	3.55341	10.0319	4.05386	5.38203	7.19397	6.82656	5.96731	1.47115	1.86881	1.06384	26.9223
Seita.1G003800	15.5011	15.2804	15.2023	16.6352	17.8923	15.251	39.8308	39.9123	35.2189	9.94821	9.79937	9.96854	19.9119	18.9554	17.0344	49.4812	49.0313	38.8605	8.80722	8.92271	9.34026	20.755	21.9671	14.9913	45.9461	46.5644	37.2039	11.1596	12.0263	7.3704	26.5212	19.1146	18.0253	39.0507	40.9699	35.2928	9.47139	9.20727	10.1143	17.9434	16.6284	19.068	43.8239	39.0147	51.4115	7.1284	6.63801	6.87077	17.6048
Seita.1G003900	11.0114	12.4486	12.0032	13.9445	11.0802	14.2349	9.19744	7.81988	8.52031	14.1556	11.0965	9.86864	11.9032	10.3397	11.8864	10.8536	9.08545	9.08534	14.8789	14.4529	11.7337	16.7172	15.7195	11.9967	8.55577	10.672	8.06849	11.7774	13.9874	9.30632	15.8669	11.8464	9.05541	8.58808	8.84675	9.2223	11.3335	11.761	11.5303	11.2531	12.3924	10.7472	7.90509	8.20603	9.09744	13.3196	11.2412	11.3067	16.1035
Seita.1G004000	5.67276	5.68468	5.76076	6.83358	6.05682	6.47088	3.6516	3.81847	2.71241	5.93616	7.02317	5.5056	4.82561	5.58482	4.70095	4.48421	5.94669	3.90533	7.03681	6.80855	5.93756	5.76011	5.84623	4.77421	5.81427	6.31245	4.19014	6.7898	8.1953	4.27812	5.74119	4.64416	4.72483	4.73012	4.11097	4.36128	6.59684	5.51682	6.13467	5.57183	4.52871	6.60365	2.94266	3.55218	2.70355	5.84101	6.02632	4.61982	5.38862
Seita.1G004100	15.2168	15.2153	14.6985	22.5302	16.8925	19.18	7.58515	7.16817	10.0649	9.95137	12.5503	10.1412	17.7519	16.6304	18.2341	7.09105	7.79417	7.40955	10.3586	8.96062	9.69867	16.0798	16.616	12.9617	13.6848	11.8604	12.4818	15.8524	18.7514	15.3921	20.1216	14.0881	19.5438	9.11127	8.59259	10.8191	12.9315	13.9745	14.6512	13.5196	15.2161	14.7894	6.83231	5.32507	7.52485	10.6248	9.58439	9.50042	17.0953
Seita.1G004200	25.9647	27.1455	26.2387	40.4675	28.7929	39.8439	25.4514	25.4704	21.0073	30.4185	34.9759	31.612	25.7026	30.9303	27.4927	30.7739	31.1311	24.1731	35.2685	34.0859	34.0199	41.3406	40.2266	33.2052	40.0997	39.0379	28.5943	40.6132	41.8574	35.3583	39.5914	30.2376	26.1233	30.3493	32.7588	32.4695	43.4415	41.8484	45.239	24.2212	30.4843	28.1768	24.3538	22.1073	26.0375	39.4758	38.1959	32.8019	36.3915
Seita.1G004300	52.4534	54.4294	61.7941	46.4713	35.2484	38.6686	11.9405	12.9942	12.6734	127.282	134.588	121.234	78.164	95.0043	81.7028	10.7045	10.7528	12.5959	82.6811	91.283	108.9	87.5033	69.8397	67.0028	19.3014	19.5527	18.21	78.391	46.369	64.9955	14.2008	36.2367	59.3777	18.3922	17.4473	16.2953	47.5244	53.0518	49.0313	17.3417	58.6637	45.3902	6.91589	8.86237	7.14209	91.1882	101.612	100.42	81.3285
Seita.1G004400	1.62468	1.21902	1.44711	4.7198	1.72837	2.44323	0.216008	0.168262	0.03166	7.13275	5.76518	6.61437	0.513577	2.68467	2.39157	0	0	0.016882	12.787	39.3558	30.2815	5.74177	1.89739	1.9722	0	0.012589	0.000884	1.29208	1.03556	0.556619	0.010736	1.13454	2.08164	0	0	0	2.44918	0.734836	1.7298	0.401075	9.007	1.71247	0.001234	0.006605	0.042299	13.4107	30.7422	22.8015	0.934149
Seita.1G004500	8.83151	26.6215	12.4078	20.0854	19.0852	18.882	7.84593	8.78068	7.74425	8.29673	13.7785	9.90582	10.8314	9.76929	27.7673	6.75968	6.40501	8.38969	12.3435	11.063	9.40329	63.6471	47.5135	10.8925	15.9586	14.1044	9.04179	13.1391	8.65175	4.40833	40.7355	29.7958	32.3472	12.1014	13.8967	10.5931	11.7194	9.10593	11.379	19.9871	19.4143	12.9477	7.41788	6.17052	6.87586	10.8767	11.9558	9.84975	102.142
Seita.1G004600	13.1094	35.2168	1.70347	38.1439	26.9625	52.9834	9.421	2.80781	17.2979	122.742	43.1796	310.798	4.18748	6.48606	10.6756	1.54787	1.80209	2.05261	27.5274	51.7949	37.2811	2.60766	2.04464	4.86888	9.63972	8.8677	30.4097	6.87421	3.27704	6.72328	0.695889	0.650278	6.05732	173.431	143.25	142.369	6.6261	17.7222	4.19011	2.07928	2.202	3.53226	2.77107	4.47027	1.70513	54.6314	78.6712	44.2142	147.624
Seita.1G004700	0.159501	0.058827	0	0.262975	0.149111	0.11135	0	0	0	0	0	0	0	0	0	0	0	0	0	0	0	0	0	0	0	0	0	0	0	0	0	0	0	0	0	0	0	0	0	0	0	0	0	0	0	0	0	0	0.088324
Seita.1G004800	0.042744	0.112782	0	0.061618	0	0.109222	0	0	0	0	0	0	0	0	0	0	0	0	0	0	0	0	0	0	0	0	0	0	0	0.046437	0	0	0	0	0	0	0	0	0	0.065086	0	0	0	0	0	0.076176	0.072979	0	0.036432
Seita.1G004900	0	0	0	0	0	0	0	0	0	0	0	0	0	0	0	0	0	0	0	0	0	0	0	0	0	0	0	0	0	0	0	0	0	0	0	0	0	0	0	0	0	0	0.113479	0.503258	0.421613	0.435884	0.047967	0.238384	8.4925
Seita.1G005000	17.6585	18.1961	11.4049	70.0333	68.665	78.2765	3.48069	2.63228	2.86096	3.52444	6.69643	4.45879	36.3068	4.96607	30.0874	1.34946	2.00198	2.12135	0.588656	0.871084	0.879616	14.6246	16.7071	24.6419	9.19227	10.2105	13.162	11.9244	10.9182	11.7285	21.6937	31.6444	39.1424	4.92391	4.12712	6.33189	4.40566	7.5417	3.69288	37.1293	38.9498	39.4445	1.25084	1.16642	0.333758	0.54467	0.566312	0.500483	21.3347
Seita.1G005100	5.18917	6.95936	6.85166	11.3066	8.90733	11.3671	9.02579	7.29333	10.8984	3.11599	1.49858	3.22246	3.91497	2.44035	4.98156	11.6566	9.0468	9.14078	3.14246	2.56096	2.1479	4.92022	4.36806	3.47674	8.10205	9.64306	17.2898	3.37277	3.58443	4.87969	2.62658	4.7843	8.47032	14.0845	17.9898	15.0594	3.24142	3.48133	3.74392	6.41469	7.67827	7.13128	15.3373	13.0299	17.3566	3.33725	2.91818	2.88854	8.38752
Seita.1G005200	2.16587	1.91379	2.59851	5.0415	3.43947	5.08145	2.1008	2.60909	2.2026	2.69754	2.66587	1.85957	2.54543	1.95443	2.1536	4.29933	3.79696	3.31534	2.76842	1.6619	1.992	4.09091	3.29003	3.46078	3.83825	3.14748	3.42089	3.72687	2.4095	2.28856	1.72464	3.44131	2.71929	3.71048	3.34866	4.39526	3.07121	2.43047	2.76731	2.79977	3.2567	3.22928	2.35061	2.13072	2.93681	1.68379	1.35398	1.76778	1.32649
Seita.1G005300	14.0732	14.3842	16.1707	20.9127	18.33	19.7784	13.1523	13.0591	9.48336	19.5578	23.0266	15.5235	18.6518	18.6495	15.9488	20.1891	16.3704	17.323	18.5169	15.7565	16.0959	19.2318	21.3258	17.0849	22.1246	23.8166	17.2597	26.8895	33.6309	21.7808	38.0303	30.6758	18.8572	20.9329	21.8859	20.819	29.7703	28.9806	27.0614	24.863	21.1089	21.0015	12.904	12.2064	12.5241	14.7846	14.2432	15.473	14.8269
Seita.1G005400	34.9863	29.9339	28.1102	14.0473	12.7444	13.8466	4.73624	2.03424	3.76296	8.88615	9.83561	15.1822	36.6784	40.479	22.4771	3.24933	4.39978	3.22179	6.13762	5.9329	6.10736	6.16637	9.01787	28.3488	0.961749	1.31368	1.58873	5.60289	5.20521	6.7055	1.96623	4.08911	3.34856	0.899476	0.395952	1.1682	2.721	3.03003	2.85774	1.59394	13.3119	5.43459	5.17584	5.69825	2.76892	6.34026	5.99061	6.37858	8.29228
Seita.1G005500	14.3383	13.9239	17.2931	22.7879	23.3884	21.3515	10.1109	8.48136	14.144	13.5908	14.0279	12.5319	8.85073	8.24539	18.5614	10.4117	10.8559	9.76838	11.8051	11.3152	10.0781	15.0997	19.0317	12.1256	10.3209	12.4863	15.9394	17.8428	16.415	15.8486	51.0831	31.3813	33.4642	13.0251	12.4382	15.3493	17.3873	17.2713	17.7802	28.6637	14.8499	21.2555	12.6993	9.48805	11.788	13.0257	10.5751	11.8682	14.649
Seita.1G005600	0.128156	0	0.32716	1.81121	1.18337	3.02798	2.85878	0.453387	0.369127	8.14848	8.65032	2.69038	0.514657	0	0	0.199331	0.259649	0.543984	0.015895	0.447982	0	0	0	0	4.20813	5.56988	5.50331	11.6439	13.5493	14.4742	0.614074	1.08674	0.8968	5.78437	2.94098	0.83521	3.88801	2.46989	4.27097	0	0.605577	0	1.87984	2.73445	0.471902	3.13894	1.73434	2.59877	0
Seita.1G005700	5.45059	5.22648	6.77222	5.77812	5.80205	6.18824	0	0	0	0.002018	0	0	0	0	0	0	0	0	0	0.015948	0	0	0	0	0	0	0.048088	0.019159	0.019574	0.096403	0	0	0	0.038811	0.016724	0.069858	0.067185	0.113688	0.051905	0	0	0	24.6997	23.3464	20.2131	62.4205	59.1309	64.2352	1.94606
Seita.1G005800	17.0932	14.9198	21.207	17.9913	18.225	14.188	8.94471	6.71272	11.431	10.6791	10.6843	10.273	9.37472	9.59895	17.9591	11.3835	12.1674	12.2713	16.2653	14.5242	14.639	13.5401	16.8537	12.2383	5.91483	8.63909	15.6125	12.2395	14.0864	12.0214	17.8893	14.386	17.4878	18.6996	17.317	20.5953	23.1538	23.8706	24.1179	25.6679	24.9493	28.5671	10.7611	9.22466	12.3375	12.2491	10.9244	10.8718	9.92434
Seita.1G005900	88.0455	82.208	61.2573	66.4066	61.7955	60.8199	18.0843	15.6133	18.852	27.6024	27.4685	27.8638	67.7031	94.6092	70.5988	14.9987	15.9432	15.0923	23.7668	21.9827	22.6322	52.3027	58.7014	118.546	17.9263	16.8447	18.9761	29.2182	27.6791	25.5814	20.4029	31.3744	31.664	16.1979	13.9395	18.2582	21.2646	22.1586	23.2988	29.9512	94.8625	58.584	14.1385	15.8968	14.4175	20.195	20.7929	19.315	62.3052
Seita.1G006000	0.398735	0.45207	0.763144	0.454457	0.526884	0.525485	3.41215	2.81244	4.81695	2.56286	1.34349	1.23843	0.894	1.14082	2.16631	0.637241	0.626131	0.470796	0.497699	0.316141	0.41746	0.530188	0.828872	0.383903	3.1413	2.10292	6.07705	1.92483	2.43675	2.99963	8.32496	2.90161	6.63667	0.825197	0.983927	0.90247	0.648382	0.62753	0.496329	0.983751	0.789574	1.52432	0.269119	0.203861	0.415875	0.306952	0.184888	0.220273	0.5116
Seita.1G006100	0.218223	0.359394	0.210726	0.14072	0.096703	0.273706	0.013506	0	0.047934	0.05869	0	0.04712	0.10734	0.332393	0.161552	0.984868	1.2325	1.00014	0.21893	0.25866	0.172934	0.572649	0.801154	0.769641	0	0	0.013673	0.017185	0.075796	0	0.612626	0.36052	0.10069	0.60913	0.688615	0.796826	0.099412	0.247423	0.084222	0.45737	0.721195	0.45153	0.032472	0.039689	0.038586	0.014869	0.059108	0.019291	0.245869
Seita.1G006200	0.323817	0.258352	0.373559	0.442791	0.29833	0.420547	0.161507	0.184704	0.384234	0.83276	0.396864	0.429349	0.331501	0.321779	0.320465	0.384156	0.714578	0.637314	0.317825	0.311148	0.306838	0.232114	0.437305	0.11577	0.267129	0.221335	0.393159	0.415681	0.389127	0.386404	0.431977	0.485831	0.057537	1.36402	1.27379	1.40209	0.301617	0.421535	0.326297	0.359198	0.379003	0.773877	0.092501	0.394507	0.355954	0.221261	0.227164	0.270367	0.387203
Seita.1G006300	2.58623	2.27512	3.86873	4.46623	3.43335	4.44658	2.9152	1.76273	2.66977	1.60513	1.31402	1.2932	0.946805	1.46736	2.6494	1.16548	1.86184	1.03062	0.443665	0.353539	0.22782	0.569421	0.742703	0.600971	2.90663	3.76921	4.50288	2.50892	2.40046	1.51219	2.3127	1.52593	2.35613	3.43415	2.46032	2.02189	0.513852	0.419535	0.222109	0.913637	0.594624	1.44249	3.33699	2.37748	3.49796	2.29011	1.47566	1.24774	1.983
Seita.1G006400	0	0.017281	0.042603	0.028056	0	0	0.026281	0.014412	0.011788	0.906679	0.786744	0.782269	0	0	0.039212	0.848708	0.983433	0.9906	0.438315	0.327115	0.438125	0.69208	0.541481	0.32401	0	0.038991	0.02581	0.033441	0.10984	0.15659	0.044262	0	0	0.512863	0.922079	0.510066	0.135476	0.399943	0.105588	0.748107	0.887353	0.893711	0.012942	0	0	1.44724	1.31336	0.995146	0.014134
Seita.1G006500	0.083353	0.186623	0.141849	0	0.145072	0	0.064267	0	0.090782	0	0.027044	0	0	0.254841	0.039892	0	0	0	0	0	0	0	0	0	0	0.068367	0	0	0	0	0.02234	0	0	0	0	0	0	0	0	0	0	0	0.09393	0.150604	0	0.046499	0.021307	0.083852	0.027725
Seita.1G006600	2.68736	1.24665	2.73373	1.38259	2.16029	1.27333	0.52237	0.223863	0.161581	0.13219	0.060601	0.175674	1.69301	3.05316	1.12883	0	0	0	0	0	0	0	0	0	0.163896	0.982716	0.09983	0.054672	0.318329	0	0.124648	0.964041	0.236837	0	0	0	0	0	0	0	0	0	0.570887	0.470146	0.468175	0.031298	0.057949	0.043485	0.089179
Seita.1G006700	0	0	0	0	0	0	0.019371	0.055682	0	0	0	0	0	0	0	0	0	0	0	0	0	0	0	0	0	0	0	0	0	0	0	0	0	0	0	0	0	0	0	0	0	0	0	0	0	0	0	0	0
Seita.1G006800	0	0	0	0.024605	0.068775	0	0	0	0	0	0	0	0	0	0	0	0	0	0	0	0	0	0	0	0	0	0	0	0	0	0	0	0	0	0	0	0	0	0	0	0	0	0.596282	0.33295	0.504468	0	0	0	0
Seita.1G006900	0	0	0	0.035956	0	0.022469	0.095525	0	0.072097	0	0	0	0	0	0	0	0	0	0	0	0	0	0	0	0	0	0.051855	0	0	0	0.020455	0	0	0	0	0	0	0	0	0	0	0	0.062353	0.016248	0.111325	0.010424	0	0	0.018534
Seita.1G007000	0.770704	0.701013	1.22024	1.83223	3.47103	2.06796	6.52398	8.94443	6.79664	0.105833	0.046648	0.216134	0.656178	0.755258	0.691427	0	0	0	0	0	0	0	0	0	7.09775	9.13044	5.91693	0	0.062681	0.020412	0.982658	0.216804	1.2626	0	0	0	0	0	0	0	0	0	1.24562	2.84206	2.46494	0	0	0	0.335661
Seita.1G007100	0	0	0	0	0	0	0	0	0	0	0	0	0	0	0	0	0	0	0	0	0	0	0	0	0	0	0	0	0	0	0	0	0	0	0	0	0	0	0	0	0	0	0	0.004124	0	0	0	0	0
Seita.1G007200	48.0589	52.8281	46.5152	54.2889	85.7387	68.4314	337.225	440.235	463.794	0.615235	0.449365	1.64549	51.0512	52.9202	83.9563	270.633	246.348	258.365	0.10241	0.133548	0.239945	70.0845	44.3973	19.2377	282.538	270.357	316.836	0.319574	0.027508	0.284325	39.2972	122.351	144.789	172.33	172.27	156.685	1.43151	0.023198	0.088268	77.6105	51.8405	51.3242	416.702	430.58	446.522	0.152491	0.423855	0.784289	49.5694
Seita.1G007300	3.24517	2.79494	3.26544	5.83269	6.7338	5.13101	1.65851	1.3682	3.87743	2.85123	8.56903	1.69747	0.790984	0.64952	1.10594	2.29833	2.12022	2.42376	4.2495	7.35754	1.87424	1.30528	4.60326	3.99815	12.0717	2.24663	4.52875	8.48857	2.27693	5.4097	2.78572	13.6414	9.93372	3.08639	2.89663	3.06232	2.82405	3.65164	4.33362	2.86133	4.35884	2.03699	6.93975	7.12846	3.09138	6.20608	3.64713	6.95099	5.22957
Seita.1G007400	15.8549	13.4539	15.8455	17.9237	17.8336	16.726	8.1531	7.92944	8.41108	8.84049	6.67171	8.92434	7.26432	8.88817	12.4089	9.88359	8.29151	10.2098	9.0783	7.00201	7.28719	14.0512	11.6985	9.01689	6.60214	10.1421	17.7589	10.4618	11.5086	7.98606	18.022	10.2915	10.1191	9.80109	8.96489	10.5263	10.2626	9.1582	10.5704	12.9635	11.3633	13.3958	6.77804	6.35684	9.60209	8.35435	7.94455	6.71131	10.5705
Seita.1G007500	0	0	0	0	0	0	0	0.050794	0	0.192544	0.118695	0	0	0	0	0	0	0	0	0	0	0	0	0	0.452033	0	0	0	0	0	0.102221	0	0	0.042559	0	0	0.096601	0	0	0	0	0	0.045311	0	0	0	0.068961	0	0
Seita.1G007600	1.09953	1.73798	1.44756	2.21758	2.0126	1.29976	0.107896	0.117379	0.078534	0	0.041906	0.058209	0.046295	0.220893	0	3.23722	2.62641	2.0955	4.52554	4.26084	3.60234	14.2901	19.4845	7.51946	0.082437	0.191227	0.090334	0.031512	0.10278	0.035376	0	0	0	2.0149	2.98338	4.29928	3.99663	6.03325	8.01303	7.08184	8.57512	7.31921	0	0	0	0	0	0	0
Seita.1G007700	96.9728	86.0688	366.52	54.4074	118.289	79.7293	41.6522	83.4114	25.8566	56.6198	123.983	62.6892	597.001	390.949	631.756	12.0111	15.6341	12.507	25.3972	16.7851	17.9552	585.12	467.331	203.286	77.4449	70.1224	40.3176	148.52	117.208	57.0734	62.8887	296.792	294.894	4.61495	4.98233	6.05318	26.5805	28.1021	24.2756	67.9304	33.2891	74.782	22.4777	19.1146	17.0965	16.8479	23.4364	24.1485	67.4446
Seita.1G007800	60.6512	63.2053	74.7765	169.41	168.555	179.228	193.68	245.235	151.507	16.8546	14.2083	11.6287	115.739	71.1545	55.8137	335.468	298.113	336.35	9.65499	7.80048	8.00258	75.7524	92.1712	112.158	381.82	329.359	223.988	17.3802	20.6111	8.84946	80.1256	64.6257	85.794	105.057	98.6685	94.8049	11.7203	11.3355	9.93143	42.3816	48.4991	41.7128	77.7192	108.554	107.353	5.03446	6.72451	4.81443	49.515
Seita.1G007900	4.84013	6.87258	6.0489	2.80641	3.77063	3.7075	59.5486	116.001	53.8153	10.4732	11.2795	8.39073	8.95791	12.3399	5.23989	62.0751	53.7874	58.067	9.17189	6.7195	6.21885	1.36262	1.72994	8.91305	45.6229	44.7381	30.106	3.50302	3.16197	2.11517	1.83075	2.7343	2.85103	14.3583	16.8933	17.1972	6.45821	5.859	5.05065	1.6103	1.79276	0.757836	62.3707	78.6034	59.716	13.6948	11.9848	16.6034	1.5126
Seita.1G008100	17.8521	18.5815	20.8803	28.1849	26.3465	29.2386	10.0177	8.6291	6.8624	8.06983	10.4725	6.15634	14.4701	13.1725	11.7922	17.3445	16.4079	13.9088	10.8882	11.0016	10.9487	15.5065	15.0218	14.8028	13.4731	12.6335	10.3692	10.0114	10.4499	6.64238	22.4184	14.9143	11.0138	15.5187	16.8847	17.3287	11.4436	10.6512	12.4656	17.594	18.3295	17.4838	14.1304	15.6682	15.6299	9.28207	10.1337	9.29614	20.0679
Seita.1G008200	0	0	0	0	0	0	0	0	0	0.783955	0.14708	0.659167	0	0	0	0.30491	0	0	0.712402	0.540325	0.610314	0	0	0	0	0	0	0.048412	0.322304	0.032216	0	0	0	0	0	0	0	0	0	0	0	0	0.065578	0	0	0.402217	0.626825	0.421324	0
Seita.1G008300	0	0	0.036923	0	0	0	0	0	0	0.488922	0.10815	0.298505	0.148525	0.034252	0	0	0	0	0.585227	0.539434	0.291388	0	0	0	0	0	0	0	0	0.043886	0	0	0	0	0	0	0.22373	0.049253	0.090112	0	0	0	0	0	0	1.00754	0.855617	0.96261	0
Seita.1G008400	46.8247	40.3988	65.1489	55.2662	64.246	62.2504	2.7471	2.23359	3.02393	5.67463	6.89803	5.53572	1.37747	1.76183	5.71186	2.71656	2.72696	3.36571	4.47778	2.89352	3.48712	20.8831	20.3688	2.98966	4.7284	4.87589	4.05681	10.0419	11.1868	7.07817	29.419	15.1527	16.9001	2.64927	2.19715	3.21352	5.93973	5.76945	5.77496	14.1461	6.00005	8.06382	38.7872	38.4415	39.9044	58.6249	53.2919	56.6447	77.1768
Seita.1G008500	0	0	0	0	0	0	0	0	0	1.19065	1.09	1.63493	0	0	0	0	0	0	1.75069	2.96801	2.32577	0	0	0	0	0	0	0.410662	0.959296	0.31142	0	0	0	0	0	0	0.134355	0.343565	0.168692	0	0	0	0	0	0	2.23358	3.39747	1.96384	0
Seita.1G008600	8.71957	11.3397	8.5251	11.6616	10.4341	14.5435	23.1978	15.6653	20.1802	3.87526	4.3464	3.59416	3.02728	3.00932	6.63708	31.03	26.3426	31.5599	4.84145	5.32867	3.85191	9.14617	8.74088	4.62765	11.603	12.7207	17.5133	2.3081	1.78935	1.85546	3.58304	3.51109	8.40608	13.6032	14.5167	12.4857	1.86523	1.92287	1.30419	2.11903	4.73256	5.22913	41.2516	38.4542	41.2463	6.36423	6.20334	6.51131	13.7904
Seita.1G008700	3.59433	3.34512	3.91941	4.75789	5.82414	4.78166	5.07549	4.04654	5.09753	2.23771	2.49494	1.73162	1.06614	2.97742	4.42654	7.07074	6.27821	7.26262	2.59918	2.28778	2.86652	6.34711	5.88515	3.54659	7.0834	6.96346	8.07571	2.71642	3.56261	2.23069	5.37517	3.39155	4.83095	5.7157	6.30088	7.57375	2.60691	3.46884	2.74726	4.99316	4.34617	5.87001	7.30869	6.24104	6.38114	2.1648	1.95327	1.94417	3.27492
Seita.1G008800	8.27596	9.72655	9.58859	9.54387	10.8692	8.55964	6.30753	8.76472	5.30587	7.54676	8.21113	7.01204	8.46847	7.12717	9.10734	5.33755	7.19051	6.34033	9.47656	9.26298	6.80729	21.2848	14.9051	7.53304	3.57906	3.98661	3.78133	4.25559	5.75407	3.28345	7.3343	16.6488	14.6841	4.25957	3.86104	4.27283	7.14761	7.18309	6.38429	17.5442	8.14598	16.2157	7.11393	4.91583	6.24474	7.41599	7.04504	8.1401	20.3237
Seita.1G008900	2.26628	1.72727	2.54203	2.39801	3.44125	3.08828	2.16371	1.8072	1.63736	2.20195	1.95615	1.82808	1.9058	1.24448	2.25928	2.72702	3.57242	2.86167	2.00831	1.53944	1.859	2.53479	3.34515	1.93903	2.00318	2.84586	3.20489	2.91648	3.05234	1.91252	4.68627	2.50732	2.98483	3.43978	3.31659	3.93179	2.22545	2.57306	2.10194	2.91861	2.3103	1.97339	2.47936	2.3277	3.0366	1.89144	1.17331	1.63582	1.95819
Seita.1G009000	22.554	24.9062	22.1399	32.4323	25.6376	29.6798	30.7688	30.208	30.7502	20.4682	21.6651	20.9239	21.9263	19.1371	25.6185	29.838	31.2915	25.8616	22.2201	19.7818	18.3394	33.5694	33.645	27.1081	41.2347	44.113	34.9164	24.7331	22.581	20.1171	31.8475	26.8975	25.3349	32.3527	34.847	33.2109	26.2111	22.4716	28.7787	27.6759	29.929	26.2835	24.4805	26.415	25.1922	21.1179	19.1944	19.3963	25.0535
Seita.1G009100	0.542628	0.38327	0.660243	0.54005	0.450043	0.428292	2.26712	1.81121	1.58605	3.82976	3.9679	2.73291	0.99	0.988926	0.351167	3.64122	3.32055	2.99374	6.61148	5.30544	8.08986	1.39648	0.797344	0.526077	4.47732	3.71215	2.29845	3.42373	2.89934	1.43247	0.465596	1.06611	0.816784	2.25574	2.7018	2.28697	2.73243	3.68154	3.93628	0.939659	0.844848	0.314041	2.32799	2.21672	1.91545	5.28869	5.1701	4.73721	1.08892
Seita.1G009200	78.8437	66.7368	73.3115	71.8114	75.0548	70.3468	36.9628	41.9343	27.4296	103.791	106.841	80.2947	136.759	134.914	70.3538	45.6564	40.9245	40.2078	80.9594	72.8538	68.2816	63.0868	67.489	107.257	53.6521	50.3539	31.5982	77.9874	87.8477	46.2826	40.4631	65.0078	42.4741	46.3516	43.035	47.5439	67.9529	72.2883	68.2101	71.1136	81.6597	69.7241	23.5009	29.2736	26.051	69.1661	64.7509	69.5702	41.9608
Seita.1G009400	0	0	0	0	0	0	0	0	0.030194	0.018348	0.021565	0.134583	0	0	0	0	0	0	0	0.018115	0.01813	0	0	0	0.129221	0.079014	0.191028	0.10705	0.028888	0.042276	0	0	0.009479	0	0	0	0	0	0	0	0	0	0.016465	0	0	0.030108	0	0.013826	0
Seita.1G009500	14.6391	10.7673	14.1316	15.2337	15.1691	15.9817	13.1913	12.5417	12.5709	15.0669	17.9935	12.2637	19.6446	16.1186	14.3894	18.6464	18.509	17.6667	18.233	15.1815	15.6694	17.382	20.2535	21.9438	18.2491	18.8063	16.6563	19.6953	19.9148	11.2704	26.4921	19.0723	13.9903	19.4493	17.6128	17.7859	18.0313	19.6366	17.9345	18.7927	16.5802	17.9077	13.2877	12.0902	14.2078	13.7059	13.3136	13.6795	12.4796
Seita.1G009600	69.7797	76.0472	68.8554	93.0518	77.7691	93.6203	74.7078	71.8999	63.1076	85.8477	76.8489	73.1267	94.2654	82.3017	77.4927	90.9336	83.3894	88.1407	85.028	79.0863	85.9047	97.4197	89.053	99.403	104.725	100.363	81.9702	76.6385	79.197	55.2889	95.42	88.6952	81.3855	94.3858	87.1128	91.2035	74.6359	75.473	79.8332	79.1159	100.692	84.2319	46.7761	55.2871	54.9328	70.6801	68.9617	66.7992	90.5956
Seita.1G009800	2.07114	1.97005	4.6966	1.24223	1.81799	1.58058	1.70883	1.99338	1.80391	2.86303	4.24559	2.28383	8.05744	6.58832	5.12343	2.87284	1.66227	3.4174	2.37497	3.46286	5.17405	5.81316	8.20301	1.23888	0.933377	1.43639	1.41623	3.82898	4.27535	3.18684	4.02575	1.91847	2.02076	1.9806	1.67526	1.54054	2.60662	3.00326	2.56775	2.62963	1.02917	2.86197	1.10719	0.909054	0.882855	2.84425	2.10774	3.26535	8.9308
Seita.1G009900	8.3323	41.0697	7.32311	3.50923	5.85923	3.6073	0.431374	0.256275	0.373066	9.96218	7.75254	4.1115	8.20834	13.269	12.0242	0.141171	0	0	3.75927	8.47695	5.25887	76.0382	52.6052	4.05201	0.868351	0.722282	0.324549	9.06893	8.16648	3.53294	24.5354	20.6323	12.4273	0.059946	0.193161	0.325969	1.38306	4.54217	1.15899	9.51451	3.57105	7.93606	0.02872	0.25734	0.204767	4.41986	10.0309	2.80135	167.784
Seita.1G010000	0	0	0	0	0	0	0	0	0	0	0	0	0	0	0	0	0	0	0.054547	0.050563	0	0	0	0	0	0	0	0	0	0	0	0	0	0	0	0	0	0	0	0	0	0	0	0	0	0.03985	0.091607	0.109254	0
Seita.1G010100	0	0.049954	0	0	0	0	0	0	0	0.058003	0.204674	0	0	0	0	0	0	0	0.067503	0.156434	0.267715	0	0	0	0	0	0	0	0	0	0	0	0	0	0	0	0.063522	0	0	0	0	0	0	0.048901	0	0.12513	0	0	0
Seita.1G010200	0.047743	0.074193	0.275769	0.198158	0.184614	0.555595	0.053654	0	0	0	0	0	0	0	0	0	0	0	0	0	0.047209	0	0	0	0	0	0	0	0	0	0	0	0	0	0	0.032648	0	0	0	0	0	0	0	0	0	0	0	0	0
Seita.1G010300	3.07529	2.76306	3.99626	4.38641	4.63339	4.10344	2.85559	2.25736	3.03243	4.72552	4.80671	3.42593	3.43682	1.83954	3.74954	4.51186	4.39314	4.85689	4.04843	3.33306	3.20867	3.35165	3.95072	2.47048	5.33457	4.60305	4.74334	4.93035	5.27738	3.09292	10.0995	5.806	4.21923	5.44778	5.66679	6.39542	3.10487	3.46326	3.34137	4.738	3.52588	4.70604	3.12446	3.08545	3.52049	3.44698	3.82397	3.37552	3.67865
Seita.1G010400	2.47144	2.67521	2.70013	0.882298	1.24876	0.713987	1.91903	2.10244	8.48606	2.29364	2.67716	1.64803	6.32591	4.94374	13.7992	1.07133	1.40976	0.883744	0.696969	0.449945	0.4354	1.74008	2.61824	0.857037	4.06254	4.48367	7.26418	3.01875	3.71075	1.82502	5.3971	2.97179	6.52066	0.764385	1.23191	1.29288	0.67112	0.71562	0.286872	1.87325	1.0322	0.832581	7.84345	6.61218	9.23041	1.88198	1.52083	1.6197	9.80573
Seita.1G010500	1.40892	0.951088	1.48319	2.2876	2.23	0.854668	2.81579	3.26648	5.11862	4.17122	5.52073	3.84412	1.91063	1.03363	1.57155	1.62461	1.20228	1.87101	0.478517	2.27759	0.799977	1.00326	0.166866	1.0283	4.92768	5.00687	5.64766	6.39561	4.69322	4.41502	9.25461	10.1202	3.35885	2.33197	2.08968	0.624893	0.887242	1.76891	1.96842	0.763053	0.253028	0.889879	3.04402	4.11603	3.21986	2.82957	2.73944	2.91267	3.76841
Seita.1G010600	0.111673	0.130739	0.230079	0.149417	0.114032	0.125931	7.7394	22.9821	1.33469	0.914547	9.63052	0.32327	2.65457	21.8094	6.73411	5.43469	6.23401	5.10265	1.54982	1.31148	0.825598	14.4507	12.2916	10.1784	21.2629	2.75431	3.52264	4.87865	1.84169	0.666351	4.67687	5.25391	0.672964	2.76242	4.04488	2.96077	0.643934	1.95521	1.09847	6.4192	4.85173	3.693	3.03763	3.619	2.23371	0.354543	0.206302	0.192463	4.14289
Seita.1G010700	3.81377	3.5393	3.67162	4.8738	5.40156	6.16583	5.89374	4.97561	3.67572	3.60389	3.33121	2.43806	2.79479	2.518	3.89023	3.80532	4.09624	3.411	1.99828	2.24016	2.63427	2.22302	2.12552	2.26801	5.50333	6.76175	5.37981	4.45428	3.74986	2.08673	4.13431	3.48042	3.68712	4.35818	4.23445	4.15464	2.34217	2.06267	2.31073	1.90614	2.05538	1.47735	6.55833	5.00727	5.83066	3.09711	2.60866	3.04844	5.68009
Seita.1G010800	0.076467	0.042737	0.077482	0.100444	0.046767	0.105014	0	0	0	0.078807	0.052589	0	0.773909	0.607828	1.25355	0.018227	0	0	0.037174	0	0.109033	0.084071	0.077523	0.095238	0.039567	0	0	0.405131	0.487076	0.054807	0.316093	0.479194	0.365815	0	0.014324	0.029576	0	0	0.049661	0.027998	0.060854	0.101159	0	0.012011	0	0.048615	0.021534	0.032764	0.24387
Seita.1G010900	0	0	0	0	0	0	0	0	0	0	0	0	0	0	0	0	0	0	0	0	0	0	0	0	0	0	0	0	0	0	0	0	0	0	0	0	0	0	0	0	0	0	0.089591	0	0.250229	0	0	0	0.20028
Seita.1G011000	1.97141	2.13276	2.49059	1.85281	1.67467	1.6454	3.61401	2.8902	3.07582	3.44535	5.114	3.54257	2.37183	2.43062	2.48475	3.99347	4.62348	3.75729	4.86006	4.27271	4.09353	2.25467	2.2474	2.40122	2.24223	3.262	1.53827	1.84384	2.47163	2.29258	2.35765	1.53629	1.25195	2.60391	2.54767	3.18224	2.53399	2.73976	2.07476	1.34918	1.86021	1.86844	3.32753	3.03191	2.7761	3.91665	3.17982	3.61984	2.48453
Seita.1G011100	2.69794	2.0369	3.44061	1.3138	1.51403	1.1028	7.43268	5.80122	15.106	4.73919	4.19109	5.06802	8.53182	6.04523	13.4189	0.721313	1.34178	1.36342	0.301512	0.351951	0.402921	2.45227	3.44009	1.93244	3.47886	5.86294	9.1516	4.72872	4.65542	3.84983	6.74774	4.24739	12.8459	1.20287	1.07204	1.63221	1.18141	0.761849	0.938894	1.36126	0.885207	1.79014	15.2501	12.726	16.469	5.4434	4.15626	4.38866	21.2286
Seita.1G011200	0	0	0	0.08315	0	0	0	0	0	0	0.113271	0	0	0.016917	0	0	0	0	0	0	0	0	0	0.140316	0.44644	0	0	0	0	0	0	0	0	0	0	0	0	0	0	0	0	0	0	0	0	0	0	0.041308	0
Seita.1G011300	7.35006	7.75099	7.99134	7.28923	6.3697	5.68081	0.368482	0	3.09888	0.001923	0	0	0.06245	0	0.928806	0	0	0	0	0	0	0	0	0	0	0	0.001007	0.366547	0.128798	1.00182	0.637799	0	0.259933	0	0	0	0	0	0	0	0.092217	0	0.112823	0.197027	0.078539	1.88642	1.28805	0.328035	0.030586
Seita.1G011400	2.59186	1.88124	2.25079	2.37504	1.97056	1.69589	3.41223	3.15553	1.42706	3.18151	3.11543	1.68991	2.74918	3.94227	1.76806	0.096164	0	0.093539	0.719488	0.423694	0.539827	0.045198	0.162736	0.200143	4.76544	5.19212	5.34331	2.55229	3.0901	0.880007	1.2323	2.45399	1.70398	0.071314	0.092438	0.167501	0.452892	0.627136	0.431804	0.124418	0.013054	0.130053	2.83782	3.40569	3.47582	0.639986	0.649646	0.865918	1.95668
Seita.1G011500	2.45782	1.88945	3.02705	4.53697	3.87698	4.22879	4.85127	6.08469	3.7958	3.52658	6.75709	7.09158	4.90361	3.37001	3.00537	3.91913	4.68924	2.95356	3.07278	2.4991	3.59033	4.50312	3.22162	2.33627	6.33411	7.79003	5.18053	5.63352	3.49943	3.40567	3.93626	3.13422	7.04698	4.16129	5.87389	3.70358	3.76503	3.64615	3.76674	3.40307	3.87108	3.37569	5.67865	5.44514	4.93688	6.00351	5.27717	6.00463	3.87041
Seita.1G011600	0	0	0	0	0	0	2.22796	3.06905	2.71834	2.06245	3.7454	0.854485	7.4346	6.44111	4.45968	1.30874	0.983076	1.18302	0.461159	0.274406	0.150739	2.52617	3.46278	1.38342	4.72	5.77478	5.71801	3.77658	5.06154	1.87464	1.91581	3.02522	2.80077	0.974324	1.0188	1.10638	0.787703	0.584697	0.534897	1.0475	1.09796	0.907099	3.98576	3.91222	4.03599	1.37601	1.37093	1.60299	6.48384
Seita.1G011700	0	0	0	0	0	0	0	0	0	0	0	0	0	0	0	0	0	0	0	0	0	0	0	0	0	0	0	0	0	0	0	0	0	0	0	0	0.189025	0	0	0	0	0	0	0	0	0	0.056225	0	0
Seita.1G011800	58.6933	39.6303	44.1236	16.242	26.0242	13.2497	2.57165	1.4251	2.95888	6.12451	12.6853	13.3412	25.5636	52.8621	47.2945	0.61999	2.0631	1.04809	5.49219	4.54028	3.95585	13.7742	15.3994	44.3235	0.523902	0.58354	1.31283	2.6759	2.74761	6.42083	3.14127	6.57321	10.4952	0.158885	0.086482	0.17966	1.31892	1.0776	0.905638	4.06802	28.2981	15.5098	4.65854	3.28333	1.43324	4.02517	9.84387	5.9557	19.586
Seita.1G011900	21.0007	18.5936	22.6568	19.2396	29.4792	23.6755	13.3416	12.4396	13.2215	29.463	37.674	25.4572	13.9792	15.4852	18.8839	14.433	15.4024	13.9988	29.8255	21.6168	22.5178	16.4142	19.7698	18.0849	16.6292	20.8971	17.8427	34.3247	41.657	22.3448	37.6363	44.9403	26.3271	19.0497	16.8392	20.1472	36.7589	36.8738	35.9762	38.3032	31.1901	31.8731	14.5957	11.9262	16.0139	29.1139	26.2756	25.5581	14.4706
Seita.1G012000	6.73686	5.29478	6.70925	8.0766	10.4945	8.16922	4.97643	4.96971	4.41542	4.78969	6.75545	3.98007	5.68595	4.73459	6.93149	6.96404	5.48313	5.97211	4.80691	4.26436	3.68949	6.18508	6.93461	6.4106	9.27443	11.1423	7.91179	8.8752	8.53562	5.80146	14.9613	8.71996	10.2634	8.75299	8.81	8.36034	9.03424	8.38572	8.39516	7.8336	9.38202	10.3086	4.64435	3.60305	4.55707	3.11948	2.97064	3.26674	4.21673
Seita.1G012100	14.3898	12.1252	12.1035	4.11043	4.95992	4.9231	3.45656	3.93593	2.67573	4.43477	5.37945	3.2361	48.6861	21.6433	9.642	4.40132	5.04554	4.59707	2.69378	2.5747	2.43973	13.6301	15.3144	32.4775	3.14942	2.87715	2.50801	4.27796	4.10574	1.68904	3.16538	5.13279	2.87192	2.48309	2.25321	2.88217	2.88991	2.42528	3.01757	5.27734	6.42413	4.50899	2.64226	3.14367	3.23001	2.00029	2.0844	2.09406	4.22765
Seita.1G012200	21.0959	17.2868	21.3904	194.986	104.434	164.004	11.9737	9.42811	13.7471	25.489	31.3574	20.1509	21.9476	18.9805	44.0993	13.2948	12.1378	12.6987	37.0654	33.4927	46.4535	33.3761	37.3922	33.3649	29.4951	30.0865	36.3722	88.6217	100.309	93.8998	191.783	246.683	248.127	72.5624	70.6776	70.9043	216.061	235.43	211.405	351.558	242.232	273.765	10.05	7.21368	9.75243	25.5429	24.9495	34.8187	13.2834
Seita.1G012400	69.492	77.1536	52.9282	70.1696	75.7324	77.8231	167.298	177.469	128.531	5.99791	5.88319	5.26014	45.0512	35.5107	46.5858	148.552	166.591	144.323	5.32419	5.51808	4.2163	26.8268	25.8813	32.7572	188.655	208.987	130.973	3.09388	3.6901	2.48239	30.5245	28.4121	36.5788	98.5858	118.067	104.432	4.28584	2.91668	2.88379	21.7807	38.5678	29.1618	239.616	228.112	231.384	4.93551	5.4076	4.54068	52.4574
Seita.1G012500	25.2815	23.1956	33.7323	25.0054	25.4816	23.1989	20.8166	24.2574	19.9034	82.7613	76.9099	62.3708	46.0653	41.1492	24.833	21.2266	23.4658	22.2285	68.8487	67.8677	63.3646	21.8904	28.8507	38.7946	14.7323	18.0587	13.0413	44.6559	45.0419	28.1314	23.4989	18.7001	17.9704	19.8792	19.79	18.3339	39.8175	39.2512	41.2756	24.404	22.2594	24.4562	23.2669	20.7642	22.5096	86.7314	78.6512	72.8107	13.117
Seita.1G012600	93.3389	68.9471	57.8238	72.1967	103.566	130.211	0.243516	0.435386	0.089385	29.9567	29.2215	50.2694	79.5205	59.6916	70.9389	1.86218	1.69826	1.93413	9.73005	12.5463	12.9763	15.1585	17.9297	140.773	3.13546	3.21858	1.09751	14.16	15.1259	9.09205	1.1537	105.482	180.913	2.32918	2.11618	6.29091	16.8394	21.8519	10.2568	67.521	82.2151	67.1344	0.154737	0.451425	0.795553	13.9075	18.9143	12.534	4.14751
Seita.1G012700	6.57533	7.33833	8.48355	7.29801	9.42374	10.3646	10.6136	11.3836	12.3535	13.4461	8.95613	17.3153	6.42408	7.1161	8.4673	6.87177	6.2157	7.65799	12.5741	16.3873	16.001	7.77339	7.73986	6.57391	16.4994	14.0791	20.7071	11.9899	11.2336	18.8205	8.16358	14.7814	15.6657	18.0646	22.9691	19.7788	12.1148	14.588	10.5102	8.51909	5.70462	9.01039	9.78376	9.18112	7.26349	11.7013	9.47462	10.2963	5.89215
Seita.1G012800	1.34346	2.69913	0.960982	0.420531	1.40902	0.373651	0.746485	0.631778	0.272015	0.199881	0.423994	0.326494	1.57618	1.75839	2.42242	0.564083	0.550485	0.310756	0.337488	0.357865	0.305827	14.1775	16.0558	8.39353	0.783802	0.782965	0.584041	0.312646	0.213648	0.100149	18.3967	5.01636	2.94327	0.614959	0.486181	0.421744	0.26959	0.321954	0.282501	3.13918	1.63283	2.34423	0.854311	0.551422	0.518156	0.491164	0.411067	0.228452	7.79795
Seita.1G012900	0.04609	10.534	0.203112	0.238129	0.173728	0.294551	0.545087	0.315777	0.203259	3.46694	1.89401	3.80694	0	0.058898	1.99154	0.121069	0.202378	0.166662	5.5739	4.3082	3.20579	10.9165	9.69015	0.197891	0.161609	0.520066	0.487129	0.635987	0.951829	0.461758	1.76392	0.190187	0.336719	0.294323	0.108543	0.223805	0.50959	2.03124	0.280504	0.187857	0.057701	0.168036	0.073809	0.077323	0.057073	6.49627	12.3672	8.9495	11.8442
Seita.1G013000	0.106611	0	0	0	0.098434	0.204379	0	0	0	0	0	0	0	0	0	0	0	0	0	0	0	0	0	0	0	0	0	0	0	0	0	0	0	0	0	0	0	0	0	0	0	0	0.096297	0.414019	0.38584	0	0	0	0.230097
Seita.1G013100	0	0	0	0	0	0	3.23009	4.29922	1.85076	0	0	0	0	0.07767	0	3.51862	3.08567	2.38665	0	0	0.176804	0	0	0	5.74751	3.83833	1.83272	0	0	0	0.077433	0	0	2.12817	2.35702	1.88867	0.006923	0.353789	0.003346	0	0	0.034197	1.99533	1.88156	1.03401	0	0	0	0.101831
Seita.1G013200	0	0	0	0	0	0	0	0	0	0	0	0	0	0	0	0	0	0	0	0	0	0.035734	0.027915	0	0	0	0	0	0	0	0.063051	0	0.230555	0	0	0	0	0	0	0.029433	0	0	0	0	0	0	0	0	0.058553
Seita.1G013300	42.8903	47.2186	26.1949	30.9559	40.2474	25.7007	40.3874	19.0308	44.2051	0	0.0302	0.027348	32.1085	21.0864	30.3875	16.261	32.8806	27.5425	0.057135	0.106816	0.050778	13.8165	11.9337	16.5406	22.6552	25.332	38.4502	0.029391	0.084001	0.145982	27.1345	18.7151	34.3778	21.0252	26.4712	24.7207	0.171423	0.131237	0.050342	14.0315	37.0381	31.7489	89.1232	52.3145	41.1246	0.020976	0.056895	0.15432	37.2428
Seita.1G013400	0	0	0	0	0	0.048768	0	0	0	7.2419	4.03788	25.9615	0	0	0	0	0	0	0.136121	1.52904	1.06497	0	0	0	0.223784	0.076641	0.100243	86.4825	84.87	259.552	0.378039	0.402434	0	0	0.054778	0	116.13	64.2469	114.106	0.053535	0	0	0	0	0	2.67632	4.85274	0.081892	0
Seita.1G013500	74.406	54.3126	100.481	277.318	295.853	259.402	88.9409	47.9194	72.8967	140.142	152.126	152.139	26.3821	32.577	55.0473	55.9391	66.4558	61.5444	142.968	166.599	143.545	23.7181	54.5043	143.996	149.594	125.583	214.735	172.388	242.375	442.262	9.40439	16.3085	54.0568	172.729	180.825	187.851	281.387	264.026	341.974	59.3412	364.328	262.462	64.6884	66.1845	47.5528	138.626	127.321	116.047	13.8674
Seita.1G013600	0	0	0	0	0	0	0	0	0	0.508444	0.604086	0	0	0	0	0	0	0	0.084765	0.31274	0.069264	0	0	0	0	0	0	0	0.087478	0	0	0	0	0	0	0	0.203905	0	0.075536	0	0	0	0	0	0	0.427329	0.271138	0.196955	0
Seita.1G013700	0	0	0	0	0	0	0	0	0	1.58047	0.171055	0.416953	0	0	0	0	0	0	0.322622	0.165823	0.123154	0	0	0	0	0	0	0	0.026266	0.05899	0	0	0	0	0	0	0.220503	0.137379	0.037453	0	0	0	0	0	0	1.15647	0.877473	1.25229	0
Seita.1G013800	0	0.523449	0.019095	0	0.595062	0.02197	17.4344	11.7558	25.0963	0.319052	0.426456	0.322897	0.627096	0.428706	0.83445	7.69924	10.725	13.7493	0.219655	0.689313	0.244284	1.48491	1.24396	0.303065	5.41551	8.54376	9.68022	0.567625	0.288041	0.194493	7.20435	0.733312	1.16823	5.32389	5.07777	8.41994	0.253219	0.332071	0.176774	1.84562	1.50281	1.82754	12.3055	17.3464	18.1316	0.440973	0.641035	0.248226	0.859384
Seita.1G013900	51.1573	47.6212	78.0579	32.2642	41.1645	29.1551	69.9801	64.0997	62.5329	57.8332	70.6083	49.6982	66.6854	54.0399	60.8124	110.709	99.3756	101.671	45.8647	38.2664	36.3341	66.6583	68.8591	60.4316	32.8294	39.1054	30.7304	28.2544	30.252	18.0263	21.4909	22.7703	28.1848	34.5751	32.9489	36.4527	24.1953	25.0511	25.2552	26.2669	39.7345	31.3292	57.9687	67.1793	69.0709	47.9179	49.5149	48.3378	38.0786
Seita.1G014000	10.2486	10.2765	12.2938	11.8055	11.4665	11.8353	15.565	13.2027	14.1945	14.9996	15.8363	16.9679	12.86	12.1642	13.2232	17.5592	16.1604	15.2347	14.3214	15.0462	12.2499	16.465	15.5363	11.4221	21.7109	17.5337	17.3729	18.6158	16.5596	24.0202	19.0112	19.42	16.7183	17.7217	16.4085	16.9993	20.0613	19.3745	19.7379	18.2785	14.0471	14.1115	10.6774	12.5583	12.6416	11.3374	13.2393	12.8962	13.0993
Seita.1G014100	22.5894	28.7014	20.0857	20.8417	23.7865	20.5598	8.3855	10.616	9.47782	12.637	10.3902	14.5793	17.907	25.8928	21.6766	10.4067	10.5547	8.50889	12.7893	11.4352	10.9529	29.1123	27.9105	19.4449	10.0565	13.2957	10.1451	14.2964	11.35	13.5411	14.422	16.5654	16.4045	12.3952	13.6849	9.56695	6.06891	9.17003	9.13296	14.4338	19.5548	18.7345	9.88528	8.74263	11.2091	12.0534	15.9053	12.5935	50.3695
Seita.1G014200	11.0203	9.96651	9.25356	7.6151	6.89028	6.6858	5.39614	5.32089	5.1934	7.82678	7.87678	6.95301	8.00697	8.22632	7.5403	6.67261	7.90278	6.32091	8.60683	7.56905	6.86352	8.57738	7.91852	9.76653	4.76304	4.73969	3.96451	5.91722	5.8179	3.69627	6.93738	4.99083	4.1366	4.69276	4.3975	5.51906	5.54967	5.3488	4.96187	4.42329	5.02304	5.04713	5.28576	5.02681	6.47382	9.32022	7.89879	7.37305	8.88846
Seita.1G014300	0	0	0	0	0	0.038955	0	0.045011	0.105664	0.178377	0.368132	0.14287	0	0	0	0	0	0	0.225578	0.186009	0.088425	0.107043	0	0	0	0.063112	0	0.285304	0.0795	0.120818	0.21682	0.11281	0	0	0.045109	0	0.188828	0	0.17533	0.044085	0	0	0	0	0	0.34897	0.331157	0.32032	0
Seita.1G014500	16.3353	14.8805	22.677	22.3258	24.4232	24.2581	21.1095	21.5836	19.7813	17.0693	20.3541	15.481	14.5174	11.2134	21.2488	26.5804	27.614	25.6648	19.5859	17.677	17.9436	33.2014	45.5677	16.1909	24.2543	26.8785	22.937	17.7598	17.6922	12.7322	17.2389	14.3113	18.4256	29.139	35.9342	31.3175	18.0041	20.365	17.7934	14.4978	17.6331	20.847	32.0289	28.3347	34.8188	19.0733	19.3718	19.0038	16.5287
Seita.1G014600	4.14798	4.71279	5.40437	7.80882	8.20689	9.04293	8.67109	7.4864	5.1893	9.62655	10.0186	10.585	4.74941	2.0176	4.29818	11.5429	11.5703	7.10159	13.4965	8.70369	7.6589	11.3721	14.1366	7.77693	8.7718	7.84798	6.84454	7.48894	12.2172	5.23683	14.241	8.19277	8.30475	8.44621	10.6222	9.56728	7.64704	10.2441	9.36177	9.10138	7.55824	9.56301	4.59138	4.81797	5.05657	7.70163	8.49356	7.50111	7.0098
Seita.1G014700	7.93687	10.3171	9.16078	3.84745	9.28671	5.20373	27.9501	17.8917	20.83	2.03507	1.18689	1.86709	7.00308	4.966	12.4684	17.2048	23.516	22.0954	1.22517	1.76743	1.22338	12.1478	10.5251	5.00136	3.66929	5.95167	5.63444	0.706562	0.417189	0.514309	7.94474	2.56986	3.4282	8.56852	9.12096	13.3808	0.430627	0.480615	0.850746	1.5465	4.60317	2.62967	26.28	25.6146	18.4886	0.94477	1.52541	0.824779	17.6432
Seita.1G014800	0.379082	0.291647	0.51477	0	0.302112	0.050148	2.34048	0.461739	1.33282	6.68933	14.3088	7.79305	0.038959	0.181049	0.458533	3.08421	5.19639	4.71294	10.7219	9.78448	10.9127	0.92031	1.31039	1.80071	0.658286	0.901048	1.93479	0.773702	1.02895	3.8529	0.1571	0.093912	0.643375	1.39839	1.0686	0.807251	1.51513	1.09959	1.47296	0.792709	0.477544	2.88675	2.89167	3.14148	1.24468	10.6473	11.0666	11.6014	2.4083
Seita.1G014900	1.09193	1.12662	1.10513	1.1538	2.86342	1.63027	5.11753	3.56109	5.08933	4.69245	4.30702	2.01545	0.470057	0.675838	0.824376	6.66369	6.17879	7.77928	5.67767	4.66501	6.77957	1.80415	2.21743	1.6566	2.33896	3.2893	4.37642	0.323345	0.515477	0.764213	0.521618	0.386127	0.973195	3.40488	3.16882	2.99317	1.6605	1.85005	0.888983	1.20861	2.01974	3.59305	4.0465	3.97829	2.33987	4.05582	5.92197	6.21823	1.27432
Seita.1G015000	0	0	0	0	0	0	0	0	0	0.536502	0.042199	0.264945	0	0	0	0	0	0	0.119284	0.186569	0.088454	0	0	0	0	0	0	0.124732	0	0.055397	0	0	0	0	0	0	0	0.037359	0	0	0	0	0	0	0	0.383092	0.565878	0.485105	0
Seita.1G015100	14.2777	12.5051	15.0912	42.7143	49.2091	47.5315	121.84	111.395	106.623	3.68711	4.45614	2.39626	11.465	5.80726	9.48915	124.918	129.379	117.935	3.2221	2.64144	2.76308	4.24707	7.18726	7.37814	97.3579	123.829	129.955	6.79652	7.71615	5.25863	11.5876	17.9492	30.1943	206.83	225.431	228.122	9.48047	9.31141	8.7939	33.9657	43.9	59.413	144.515	133.917	130.968	3.92828	3.67538	3.05007	8.45939
Seita.1G015200	0	0	0.201011	0	0	0	0	0.224705	0.078662	0.072369	0.212997	0.075845	0.163354	0	0.245618	0.17139	0.20015	0.171081	0	0.044692	0	0	0.191541	0	0.07373	0.101857	0	0.086848	0	0	0	0	0.111618	0.370428	0.157817	0.088962	0	0	0	0.098324	0	0.179823	0.10556	0	0	0	0	0	0
Seita.1G015400	0.419906	0.34645	0.162832	0	0	0.124479	1.2425	0.630445	0.652377	1.00347	1.78253	0.73303	0.084659	0.278643	0.535549	1.08362	1.69356	0.881588	1.9848	2.26589	2.86009	0.290459	0.385171	0.080574	1.04692	1.69117	2.34297	0.454925	0	0.108823	0	0.273291	0.157015	1.4088	2.40795	1.04544	0.268676	0.143327	0.205419	0.528861	0.038519	0.604187	2.14677	2.64347	0.879269	2.19947	2.64385	2.31889	2.04249
Seita.1G015500	2.96214	2.6711	2.9924	5.71457	5.34635	6.2334	5.17215	5.42058	4.14606	5.89046	4.16927	4.56735	2.58541	1.75442	2.1303	5.80374	6.99287	6.02643	5.99328	5.69304	5.00048	2.93348	3.08843	2.23521	9.50018	3.27973	4.11925	8.29479	8.06808	3.56691	3.48413	4.17225	3.54913	4.37665	6.79124	5.8293	3.2306	6.60366	7.98254	5.08685	4.07179	4.55412	2.45556	3.97667	3.90952	3.87033	5.23944	5.04455	2.00494
Seita.1G015600	2.60963	2.19762	3.31182	3.27149	2.75651	3.20455	2.18081	2.04985	3.18412	1.637	2.42081	1.46663	1.19693	1.30564	2.37094	2.1338	2.15625	2.04982	1.01537	1.03282	1.46184	2.02129	1.90045	1.35439	2.43415	2.5651	2.14405	2.26173	3.54648	1.77828	2.39556	2.20084	1.30165	2.17094	1.90082	2.19127	2.56369	2.02447	1.9916	2.25559	1.99652	2.01968	3.11209	2.8721	3.23232	2.64209	1.48855	1.79992	1.68998
Seita.1G015800	0	0	0	0.292012	0.043616	0.803362	0	0.024181	0	2.84116	1.15333	6.10849	0	0	0.022755	0	0	0.038391	0.308743	1.04923	0.273145	0	0	0	0.747317	0.50758	1.02219	25.9956	20.581	104.947	0.242279	0.134956	0.632716	1.74687	0.260992	0.379116	37.9643	28.2464	31.2933	0.802625	0.050527	0.136949	0	0	0	0.59324	1.51515	0.552174	0.023479
Seita.1G015900	0.125879	0.203125	0.04632	0.044051	0.038535	0.039385	0.943765	0.473331	0.447952	0	0	0	0	0	0.054192	3.27236	2.47338	2.61269	0	0	0	0	0.11158	0	0	0	0.089567	0	0	0	0	0	0	0.279691	0	0.497511	0	0	0	0	0	0	0.25465	0.335436	0	0	0	0	0
Seita.1G016000	567.943	449.164	368.545	337.37	286.899	297.101	19.2876	14.8931	17.6852	114.218	104.732	136.786	292.041	504.567	341.362	15.8691	17.4643	20.6488	146.536	163.13	166.655	110.06	118.961	352.934	22.1088	31.0472	33.1079	114.675	92.2312	117.998	20.4944	69.3312	72.7779	19.9471	21.2952	24.198	55.7477	63.6642	59.254	50.7521	248.838	134.157	29.332	27.6424	17.6596	166.695	191.548	162.432	211.046
Seita.1G016100	35.1899	36.1713	44.4353	31.5071	34.9168	31.6367	41.259	32.2314	57.1995	47.5339	41.0509	45.7036	34.6474	33.1524	45.8085	30.9436	31.673	41.3021	36.7134	36.9303	41.5422	30.8119	37.4807	28.0978	34.4368	35.2245	51.3697	47.8843	44.0698	45.575	37.8764	33.0917	44.4975	37.8266	37.9615	40.1787	43.1106	43.21	45.3502	28.9852	26.4805	26.8772	39.4669	35.0873	39.5832	39.8843	37.8142	37.9319	26.8406
Seita.1G016200	7.153	8.16492	9.55526	7.91548	8.81649	8.36795	5.72497	4.41603	7.32767	8.16864	9.39685	8.44022	9.81567	8.62028	10.8098	5.64377	6.45321	5.10968	6.02185	5.88	6.11952	9.32089	10.3919	7.68642	6.30278	5.28526	8.56135	8.19287	8.9414	7.24869	10.5701	7.32202	8.13702	5.93562	6.50052	6.30741	6.54961	7.52566	6.94365	6.82	6.40012	7.35863	4.88976	5.01743	4.49174	6.60864	5.59046	6.83326	8.02876
Seita.1G016300	1.45492	1.94358	1.11397	0	0.187879	0	0	0	0	0.993176	0.842495	0.264495	28.6453	12.261	0.665007	0	0	0	0.73926	0.561881	0.409252	0.940972	1.39381	7.46538	0	0	0	0.34412	0	0.191718	0	0.258621	0.088779	0.155154	0	0	0.262184	0.430967	0.081147	0	0.028087	0.315149	0	0	0	0.747258	1.10324	0.374533	1.82195
Seita.1G016400	0.275049	0.333741	0.122219	0.120808	0.040392	0	0	0	0	8.22425	5.65885	9.8663	1.42177	1.0944	0.241011	0	0	0	4.37652	5.75337	6.40081	0	0.279122	0	0	0	0	1.62741	0.998821	1.05581	0.159702	0	0.251125	0	0	0	2.2997	4.88939	2.31488	0.072719	0.284652	0.465812	0	0	0	8.85934	10.2484	7.42001	1.24933
Seita.1G016500	200.508	225.556	140.542	169.239	221.252	209.024	2155.65	2440	2534.89	0.758511	0.203713	1.33476	152.728	100.57	174.67	2544.43	2363.79	2279.01	0.548256	0.558421	1.28148	70.5636	68.8523	94.9594	1930.55	1854.51	1729.45	0.466895	0.793153	2.00992	120.833	155.36	305.745	1116.67	1323.91	1097.16	9.63027	0.302759	0.317311	140.196	212.155	203.265	2189.55	2409.53	2049.04	0.312767	0.448763	1.82874	121.661
Seita.1G016600	0	0	0	0	0	0	0	0	0	0	0	0	0	0	0	0	0	0	0	0	0	0	0	0	0	0	0	0	0	0	0	0	0	0	0	0	0	0	0	0	0	0	0.291128	0.790906	0.633573	0.070659	0.130414	0.109046	0.381298
Seita.1G016700	0	0	0	0	0	0	0	0	0	0	0	0	0	0	0	0	0	0	0	0	0	0	0	0	0	0	0	0	0	0	0	0	0	0	0	0	0	0	0	0	0	0	10.926	19.5049	21.0153	2.16267	1.86788	2.09352	1.62394
Seita.1G016800	0	0	0	0	0	0	0	16.916	0	0	0	0	0	0	0	0	23.6192	0	0	0	0	0	0	0	0	0	0	0	0.029088	0	0	0	0	0	0	0	0	0	0	0	0	0	0	0	0	0	0	0	0
Seita.1G016900	0	0	0	0	0	0	0.21995	0.184999	0.099987	2.63019	4.65329	0.529755	0	0	0	2.49427	2.11554	1.32778	0.482313	0.686427	0.197529	0	0	0.063717	0	0.459107	0.067806	0.027987	0	0	0	0	0	0	0	0	0	0.017499	0	0	0	0	0	0.033045	0	0.74142	0.895405	0.742994	0
Seita.1G017000	0	0	0	0.05468	0	0	0	0	0	0	0.0714	0.019554	0	0.066959	0	0	0	0	0	0	0	0	0	0	0.268682	0.04091	0	0	0	0	0	0	0	0	0.10361	0	0	0	0	0	0	0	0	0.036697	0.113505	0.179308	0.036753	0.093254	0
Seita.1G017100	0	0	0	0	0	0	0	0	0	1.46502	0.900821	0.411617	0	0	0	0	0	0.086083	0.53446	0.158549	0.589566	0	0	0	0	0	0	0	0.185336	0.110652	0	0	0	0	0	0	0.082264	0	0	0	0	0	0	0	0	1.40913	1.74058	1.19657	0
Seita.1G017300	0	0	0	0	0	0	0	0	0	0	0	0	0	0	0	0	0	0	0	0	0	0	0	0	0	0	0	0.292083	0.195199	0	0	0	0	0	0	0	0	0.084518	0.161734	0	0	0	0	0	0	0	0	0	0
Seita.1G017400	0	0	0	0	0	0	0	0	0	0.444841	0.219505	0	0	0.088176	0	0	0	0	0.417605	0.36753	0.161329	0.194971	0	0	0	0	0	0.486788	0.163688	0.169019	0	0	0	0	0	0	0.44653	0.339777	0	0	0	0	0	0	0	0.496568	0.264117	0.598739	0
Seita.1G017500	0.270559	0.415959	0.556976	0.309913	0.368538	0.338391	0.052848	0	0.074454	0.822476	2.69813	0.653782	0.494641	0.649277	0.192997	0.127926	0.19438	0.286884	0.731388	1.28322	0.902123	2.31041	0.77919	0.873915	0.166859	0	0	1.1416	1.16571	0.526543	0	0.073364	0.065668	0	0.058476	0	0.759037	1.63603	0.766147	0.136585	0.121938	0.055169	0.083802	0.094221	0.000412	0.894596	0.96343	1.61552	0.188345
Seita.1G017600	5.05546	3.94648	5.50596	4.09305	4.62246	4.66397	5.06236	5.44593	5.38565	2.09458	2.17198	2.36822	2.16621	2.5434	3.46313	5.29456	6.1581	5.6708	1.90573	2.39945	2.18185	3.92104	3.96042	2.67879	4.39863	4.73617	5.96971	2.42159	1.81054	1.02959	1.39541	1.88334	4.10582	4.82815	3.91874	4.66894	1.31045	1.32216	1.66729	2.53554	2.7322	1.8329	4.2233	4.85435	5.52336	1.94345	1.88081	2.01363	2.96313
Seita.1G017700	0	0	0	0	0	0	0.143892	0.15887	0	0.555373	0.973898	0.521081	0	0	0	0.0566	0	0	0.344685	1.31909	0.533956	0	0	0	0.046238	0.11138	0	0.133962	0	0.05828	0	0	0	0.047329	0	0	0.06887	0.344	0.094889	0	0	0	0.196993	0	0	1.11339	0.562618	0.476637	0
Seita.1G017800	0	0	0.081704	0	0	0.062673	0	0.070244	0	0	0	0	0.14607	0.263856	0	0	0	0	0.038883	0	0	0.041763	0	0	0	0.14774	0.032206	0	0	0	0.106399	0.263638	0.058764	0.016349	0	0	0	0.036208	0	0.03417	0	0	0	0	0	0	0.052592	0	0.102649
Seita.1G017900	0.234646	0.141799	0.199721	0	0	0	0.211931	0.04683	0.401044	1.9927	2.04689	1.31796	0.529096	3.76396	0.262832	0.461499	0.608839	0.510171	3.50733	2.50953	2.66485	0.443986	0.327859	0.079242	0.054884	0.065662	0.711685	0.620647	0.220565	0.521591	0.049962	0.058684	0.105406	0.409958	0.138447	0.38631	0.245571	0.290636	0.840472	0.045866	0.149537	0.132832	0.246052	0.32138	0.148921	1.52459	2.72205	2.1282	0.364823
Seita.1G018000	0	0	0	0	0	0	0	0	0	0.060719	0	0	0	0	0	0	0	0	0	0	0	0	0	0	0	0	0	0	0	0	0	0	0	0	0	0.040474	0	0	0	0	0	0	0	0	0	0.063705	0	0	0
Seita.1G018200	0	0	0	0	0	0	0	0	0	0	0	0	0	0.059533	0	0	0	0	0	0	0	0	0	0	0	0	0	0	0	0	0	0	0	0	0	0	0	0	0	0	0	0	0	0	0	0	0	0	0
Seita.1G018300	0	0	0	0	0	0	0	0	0	0.495456	0.202516	0.710734	0	0	0	0	0	0	0.38321	0.872149	0.298386	0	0	0	0	0	0	0.244146	0.811838	0.42665	0	0	0	0	0	0	0.222452	0.23905	0.297823	0	0	0	0	0	0	0.405932	0.359998	0.288538	0
Seita.1G018400	0	0	0	0	0	0	0.109571	0.076155	0.096523	0.113764	0.044588	0.084967	0.026452	0	0.072197	0.041601	0.043144	0.027921	0.106331	0.098172	0.110997	0	0	0	0	0	0.011665	0.01466	0.085323	0.097199	0	0	0.028632	0	0	0	0.026683	0.094951	0	0	0	0	0.136133	0.092435	0.080906	0.171128	0.19991	0.045406	0
Seita.1G018600	0.908584	0.567739	1.58733	0.078139	0.635363	0.405753	0.10073	0	0.049619	0.200807	0.11813	0.240404	0.042049	0.021567	0.570897	0	0	0.020712	0.05852	0.198325	0.226959	0.120221	0.644249	0.588147	0	0	0.055627	0.163127	0.269291	0.12189	0.041776	0.09967	0.464777	0.018825	0	0.020991	0.222043	0.124939	0.273647	0.402568	0.364607	0.489189	0.018038	0.110092	0.063661	0.147798	0.36784	0.059783	0.549749
Seita.1G018700	0	0	0	0	0	0	0	0	0	2.01723	1.37983	2.4464	0	0	0	0	0	0	1.17083	2.11843	2.37329	0	0.033547	0	0	0	0	0	0	0.085661	0	0	0	0	0	0	0.096624	0.109211	0.17348	0	0.130173	0	0	0	0	6.96916	4.45486	3.75214	0
Seita.1G018800	0	0.104739	0.253567	0	0	0	0	0	0	1.72157	0.899459	1.47741	0.067998	0.120611	0.212511	0	0	0	2.94203	3.86578	3.68448	1.6227	1.1954	0.066738	0	0	0.032732	0.25891	0.172828	0.114862	0	0.158907	0.436843	0	0	0	0.309708	0.320427	0.284895	0.401442	0	0	0	0	0	5.30934	4.69957	3.51282	0.19406
Seita.1G018900	0	0	0.044283	0	0	0	0	0	0	0	0.200173	0	0	0	0	0	0	0	0	0	0	0	0	0.070924	0	0	0	0	0	0	0	0	0	0	0	0	0	0	0	0	0	0	0	0	0	0.026769	0.079792	0	0.027818
Seita.1G019000	0.527177	0.480871	0.592634	0.401941	0.845706	0.490547	0.220249	0.242018	0.22713	0.51569	0.608295	0.984312	1.45176	0.977524	0.587116	0.264285	0.229623	0	0.514945	0	0.204738	1.10842	0.711667	0.813044	0.282827	0.681936	0.316852	0.634968	0.622031	1.38662	0.722667	0.78244	0.8192	0.388098	0.139259	0.144249	0.655816	0.893547	0.135319	0.305313	0.698616	0.262768	0.154534	0.336576	0	0.141904	0.362225	0.439102	0.86865
Seita.1G019100	90.1061	117.78	138.184	23.4401	58.641	25.0979	4.62184	1.8419	3.15776	18.304	20.8045	14.539	122.711	101.858	162.351	1.88755	3.39297	4.34325	6.3664	8.77009	6.84906	193.51	167.892	76.4397	3.18315	4.03277	2.62956	22.8567	17.6968	11.4288	88.7082	97.6067	92.2066	0.255283	0.395332	0.856697	6.03028	8.3543	5.83995	62.2843	40.1661	45.236	5.1019	5.40937	6.4993	8.74946	12.944	6.98095	149.608
Seita.1G019200	0.508039	1.20659	0.308636	0.555896	0	0.221954	0.112657	0.598522	0.228914	0.417698	1.10749	0.488684	0.834066	0.130883	0.595851	0.284773	0.209317	0.208174	0.340794	0	0.515485	0.742882	0.733691	0.69778	0.67212	1.45192	0.370937	0.811431	1.02737	1.12959	0.101436	0.616672	0.279969	0	0.122784	0.32729	0.746664	0.709618	0.512767	0.292785	0.725671	0.113198	0.386687	0.150638	0.722107	0.621949	0.27938	0.31695	1.20082
Seita.1G019300	13.5526	11.8148	14.6334	16.8165	19.2272	17.452	28.3759	21.5718	30.5331	11.5508	9.01406	13.1195	6.61682	8.62199	14.8957	29.5536	25.9486	45.7138	13.8464	14.701	18.0266	13.7306	14.6208	11.9787	15.5833	18.1693	34.8064	17.2683	14.7816	16.3005	17.2836	16.1575	25.8348	30.5092	31.6218	28.4565	22.2565	22.1477	23.2915	21.3414	17.3254	20.5935	35.0573	30.952	29.7158	10.4101	10.0331	9.80628	11.6096
Seita.1G019400	2.66365	2.15906	3.14466	0.07153	0.310498	0.087789	1.11234	1.76245	1.6876	2.61778	3.84625	3.33858	0.995244	0	1.09261	0.146487	0.110216	0.152039	2.16953	1.81466	1.85734	0.115532	0.051785	0	1.05027	0.79115	0.396895	0.806296	1.32967	1.84429	0	0	0.237845	0.293079	0.255985	0.203401	0.845484	0.256525	1.11942	0	0	0.023316	1.32811	0.758515	0.391932	2.7946	4.28912	3.25576	0.775184
Seita.1G019500	0.73346	1.11461	0.980797	2.40552	2.97598	3.94941	6.89834	6.33394	7.17887	7.36908	6.95532	13.816	4.23273	2.54652	2.08269	6.53031	7.07388	5.68129	3.57063	3.35176	3.60461	3.04801	3.90687	1.84241	42.0088	33.2229	24.6681	40.7966	56.2552	48.9356	36.36	42.6663	15.4703	28.1674	31.3667	25.899	27.188	20.9818	24.8136	20.5027	3.79054	7.00038	6.71675	6.03417	7.67789	5.64856	6.38381	3.70279	3.5088
Seita.1G019600	3.63637	12.2559	2.97591	2.58892	2.35767	1.79708	0.519934	0.547275	0.497367	2.56045	2.51395	2.54345	0.935484	1.56322	4.46059	0.440526	0.543183	0.647697	2.21099	2.74051	2.37778	5.99446	5.57615	2.02202	0.566403	0.399614	0.540481	0.654504	1.20362	0.661046	5.94199	3.25705	1.54285	0.416347	0.480211	0.445225	0.414861	1.21645	0.39007	1.51586	2.57109	1.35926	0.660403	0.416551	0.78471	3.37181	4.19002	1.84358	57.8957
Seita.1G019700	10.2737	12.1422	12.1132	8.14113	10.6841	6.32635	2.46425	4.4375	2.19432	17.2228	20.0763	12.0131	19.5948	20.2828	8.10086	2.13025	2.2147	1.78838	10.2056	8.33632	8.30563	11.2854	16.7012	26.0994	6.84072	7.30903	2.54185	26.0639	29.1278	10.5481	15.3504	14.3705	5.88706	1.9975	1.36361	2.17836	12.1558	13.9343	12.7739	11.0159	8.82958	5.86233	0.909009	0.951614	0.961334	15.7223	12.5376	9.51535	10.8489
Seita.1G019800	7.48067	7.66337	5.90025	0	0.077659	0.025926	0.131418	0.23208	0.023768	1.08225	1.45561	0.827034	51.4945	6.75995	5.05039	0.063708	0	0.063781	0.500905	0.418695	0.612622	1.89451	1.83595	6.98562	0.102055	0.242427	0.09326	0.50166	0.444464	0.022285	0.015553	0.181828	0	0	0	0	0.166806	0.390443	0.070744	0	0.061551	0.027475	0	0.046922	0.030802	0.886201	1.74672	0.673204	0.847665
Seita.1G019900	41.5831	41.6101	41.2577	42.6388	28.544	39.832	38.5066	34.9069	20.3771	55.4016	61.3766	33.3441	67.0906	51.0792	31.7276	44.6219	40.3055	36.99	49.8411	50.2801	42.6835	46.0925	44.2842	53.4222	42.3671	40.7389	22.2244	50.9755	48.5289	25.6527	26.2646	29.7527	17.4113	38.9925	40.0412	40.4884	48.4924	47.8703	48.6599	26.0627	36.34	30.092	27.6752	30.8838	28.8772	41.2955	41.8455	44.1964	44.7241
Seita.1G020000	0	0	0	0.036694	0	0	0	0.418377	0.276738	0	0	0	0	0	0	0.318614	0.351261	0.199282	0	0	0	0	0	0	0.234044	0.171822	0.25351	0	0	0	0	0	0	0	0.194136	0	0	0	0	0	0	0	0.00957	0.019988	0.084151	0	0.020697	0	0
Seita.1G020100	1.45258	3.71715	3.46504	0.109596	0.057041	0.148687	2.01105	2.19025	2.33874	0	0	0.043909	0.709962	0.775787	1.6701	3.57232	4.21206	1.9964	0.022646	0.008982	0.036792	1.69746	1.61494	0.160833	0.664718	1.1166	1.07039	0.010792	0.021905	0.012081	0.028052	0.032381	0.052338	1.80427	1.76659	1.87445	0.009821	0.117462	0.024105	0.072669	0.179925	0.298519	2.47979	2.28938	2.31219	0.018083	0.033016	0.006494	2.66289
Seita.1G020200	0	0	0	0	0.085728	0.296378	0	0	0	0	0	0	0	0	0	0	0	0	0	0	0	0	0	0	0	0	0	0	0	0	0	0	0	0	0	0	0	0	0	0	0	0	0.262759	0.62601	0.761263	0	0	0	0.096516
Seita.1G020300	0.188939	0.139732	0.077554	0.182336	0.132104	0.095972	1.0959	0.990813	0.532012	0.773984	1.46364	0.643854	0.124079	0.091025	0	1.27258	1.56617	1.06256	0.593199	0.407822	0.657326	0	0.035464	0.044875	1.00957	2.27447	1.52784	1.65487	2.90219	0.706909	0.426408	0	0	1.69058	1.57032	1.42763	1.18611	1.47593	1.57125	0.038961	0.070118	0.127888	1.23537	0.942683	0.966865	0.718191	0.833222	1.41188	0
Seita.1G020400	10.8545	10.29	12.1808	10.8066	11.9691	12.5812	8.98064	8.32499	9.26678	12.7287	13.8693	9.43359	10.9866	10.9918	11.546	9.97409	9.54942	10.9126	11.3655	10.3252	9.85228	9.75117	12.0862	12.9683	9.85008	11.4191	10.2667	13.9411	14.43	10.0018	24.8981	17.1942	12.4349	14.0593	12.6677	14.3421	13.8685	11.9943	13.9911	18.0128	15.8403	15.4699	6.6944	6.87056	5.92849	9.91212	9.10412	9.53433	9.7864
Seita.1G020500	10.3487	11.9442	12.3977	10.8449	10.562	9.95139	12.1768	10.0065	13.0226	5.80209	6.6453	6.33589	6.63013	8.36702	14.9161	11.3789	12.997	11.4151	7.43418	6.87231	6.8873	13.2305	14.7259	8.37878	7.87987	9.11749	10.9418	5.97491	5.94767	3.93057	6.93448	6.58342	9.0473	12.9414	13.5045	14.3674	6.19658	7.10969	6.80079	7.60431	8.33988	10.3817	11.949	8.75043	14.7245	7.25785	4.94621	6.577	12.6662
Seita.1G020600	15.0713	14.3592	16.5261	9.42299	9.77835	8.79926	21.4425	34.9354	35.7324	28.5724	23.4828	30.9429	9.78246	12.8865	18.9142	15.0194	12.9093	11.7287	27.2372	22.3455	23.6158	13.0651	14.4313	10.8341	26.2689	29.6649	36.3899	30.4288	23.2942	28.0235	16.5804	21.7813	27.3182	66.6243	56.5683	41.2737	34.9822	35.1899	37.3022	32.187	26.879	28.6194	25.098	12.2556	14.4229	23.706	25.5102	29.7614	11.4032
Seita.1G020700	44.4788	48.2887	53.5595	99.3541	66.8625	95.7749	27.2973	23.854	31.6829	75.8669	67.352	109.168	30.4663	37.8517	59.9028	30.035	37.6169	30.3865	83.7089	95.7189	85.4868	56.0734	56.3962	47.841	45.5677	47.5874	51.3703	68.8332	74.5453	120.312	68.591	78.2722	103.098	42.6579	39.9607	42.7655	87.7905	90.0755	92.4087	69.4479	63.5742	76.8696	32.1723	26.0164	28.1601	149.991	140.387	121.346	81.2025
Seita.1G020800	0.215896	0.749991	0	0	1.16366	1.84814	1.08244	0.543957	0.796678	1.06532	0.427384	0.565746	0.708903	0.429847	0	0	2.36646	0	0	0	1.30152	0.611642	0.908399	0	2.67236	1.35385	0.772049	0.614568	0.732158	0.474836	0.741923	0.74924	0	2.81605	0.54589	1.14208	0.55787	1.42411	1.17949	0	0.266132	0.712172	5.31722	5.88097	7.53149	5.78742	4.26338	5.61	3.71621
Seita.1G020900	8.63452	10.2057	7.74827	6.90554	6.51792	8.47913	15.8336	18.6808	19.3767	11.6798	10.01	17.0406	14.126	13.3931	10.4366	14.6391	13.6239	10.3836	9.90325	9.12803	7.1623	9.43966	8.5952	11.1131	15.5782	11.7349	13.4428	8.97044	9.02204	16.0059	4.47558	6.92678	6.58353	9.91548	10.9534	9.10307	8.64074	9.77701	10.8074	6.05154	8.31794	5.03546	13.0431	13.6624	12.2227	12.1525	11.3768	12.5399	10.6016
Seita.1G021000	0	0	0	0.011732	0	0	0.031104	0	0	0	0	0	0	0	0.016242	0.018823	0	0	0	0	0	0.040835	0.011668	0	0.25155	0.215079	0.268404	0.098944	0	0.608647	0	0	0	0.219536	0.216134	0.168146	0.408315	0.612165	0.197868	0.033635	0	0.061909	0	0	0	0	0	0.025725	0
Seita.1G021200	0.085646	0	0	0	0	0	0.757249	0.755819	1.0636	0	0.118695	0	0.105624	0	0	0.222723	0.229699	0.440758	0	0	0	0	0	0	1.00725	1.06879	0.81182	0.112784	0.119619	0	0	0	0	0.845998	1.45247	0	0.198884	0	0	0	0	0	0.847925	0.738187	0.635347	0	0.070735	0	0
Seita.1G021300	16.5083	12.8266	16.1123	12.7455	9.83123	15.0159	0.288634	0.625285	0.313811	23.2093	19.8929	30.7591	5.71073	10.4874	10.0066	0.189751	0.075167	0.087678	19.8519	18.6651	15.1644	10.2655	10.4735	18.4591	0.195586	0.185704	0.230764	12.1066	12.0463	16.5615	0.171041	1.4044	2.42707	0.136358	0.050619	0.041375	16.2962	16.7183	17.2331	3.15816	12.2916	5.74569	0.285071	0.096755	0.141145	22.2882	19.8261	50.0484	3.32538
Seita.1G021400	9.96248	10.7939	10.6115	9.60715	9.42729	8.60798	7.44573	6.95777	6.39328	5.64461	5.68745	6.54697	9.01131	6.78792	10.0773	7.62778	9.25653	7.5855	6.34663	6.57218	6.68587	7.98209	8.68791	6.23794	4.71961	6.58395	7.90051	4.20659	3.73689	2.88582	9.33018	7.11952	6.84178	6.70256	7.45697	8.7123	3.05378	3.51937	3.33948	5.19655	6.47345	6.15443	7.70305	7.52975	7.33921	7.98997	7.25251	7.12873	10.5815
Seita.1G021500	0.052598	0.073687	0.016511	0.041176	0.059531	0	1.22889	1.77477	0.922818	2.49392	2.43359	4.27776	0	0.091453	0	1.32527	2.1355	1.20893	2.95684	4.01405	4.26366	0.080176	0.03863	0.0233	1.87025	2.74721	1.04969	0.282125	0.322293	0.859815	0.59901	0.023714	0.023964	1.41437	0.915323	0.697304	0.869705	0.909054	1.50963	0.076117	0.021834	0.018791	1.55765	0.954386	0.806798	3.35753	3.55997	2.36671	0.080973
Seita.1G021600	0	0	0	0	0.01915	0	2.49071	0.770965	2.02292	1.23676	0.699783	1.58585	0.059443	0	0.886562	2.57645	2.88929	2.21802	0.503908	0.810291	0.690929	0.624525	1.12453	0.221903	0.703104	0.588133	1.51387	0.115305	0.098276	0.393296	0.0918	0	0.160106	2.18145	1.93957	1.93923	0.071532	0.057954	0.222608	0.055996	0.030427	0.054056	0	0	0	0	0	0	0
Seita.1G021900	8.47029	7.01839	6.91525	4.66185	4.01772	4.36797	29.5679	18.1709	40.2809	3.42032	3.54769	4.45649	4.05642	3.96469	6.22597	27.8651	29.1749	38.331	2.96823	5.59527	4.64579	2.36906	3.1855	2.33721	13.1925	16.4257	34.1139	1.68543	0.996968	1.24698	0.543038	0.904224	4.4059	27.3156	25.8302	30.1969	0.75718	0.779671	0.646709	2.06431	6.62201	6.7878	32.2989	33.4051	34.6183	3.74248	3.87442	3.71648	3.66493
Seita.1G022000	0.028309	0	0.027123	0	0	0	0.07487	0	0.028514	0	0	0.071918	0.037822	0.112544	0.033086	0.056236	0.670394	0.115161	0	0	0	0	0.0652	0	0	0.049044	0.032074	0	0	0	0	0	0	0	0.105161	0	0	0	0	0.017129	0	0	0.303388	0.112961	0.185262	0	0	0	0
Seita.1G022100	0	0	0	0	0	0	0	0.030965	0	0	0	0	0	0	0	0	0	0	0	0	0	0.149267	0	0.106209	0	0	0	0	0	0	0	0	0	0	0	0	0	0	0	0	0	0	0	0	0	0	0	0	0
Seita.1G022200	0	0	0	0	0	0	0	0	0	0.103266	0	0	0	0	0	0	0	0	0.175425	0.147348	0	0	0	0	0	0	0	0.046578	0	0	0	0	0	0	0	0	0	0.141899	0	0	0	0	0	0	0	0	0	0	0
Seita.1G022300	0	0	0	0	0	0	0	0	0	0.068894	0	0.038651	0	0	0	0	0	0	0.366024	0.150966	0.175826	0	0	0	0	0	0	0	0.043015	0	0	0	0	0	0	0	0	0	0	0	0	0	0	0	0	0.468421	0.423028	0.273656	0
Seita.1G022400	0	0	0	0	0	0	0	0	0	6.0839	5.23392	1.19771	0	0	0	0	0	0	2.26203	1.8281	3.03353	0	0	0	0	0	0	0.077948	0.607186	0.025935	0	0	0	0	0	0	0.105339	0.190019	0.069744	0	0	0	0	0	0	5.97061	4.10809	1.93358	0
Seita.1G022500	0	0.026922	0	0	0.028567	0	21.7962	4.68522	7.92033	0	0	0	0.032934	0.066888	0	0.486118	0.546822	0.780076	0.035303	0	0	0	0	0	0.148493	0.044413	0.288035	1.18628	0.14919	0.228184	0	0.039694	0.071296	0	0	0	0.577377	1.5006	0.906772	0.126163	0	0	17.288	13.4437	9.64741	0.257304	0.201104	0.089052	0
Seita.1G022600	0	0	0	0.111441	0	0	0	0	0	0	0	0	0	0	0	0	0	0	0	0	0	0.317153	0	0.13676	0	0.487105	0.105582	0	0.351754	0	0	0.147837	0	0	0	0	0	0	0	0	0	0	0	0	0	0	0	0	0
Seita.1G022700	0.407738	0.593259	2.02529	0.729959	1.05867	1.0463	1.09142	1.44151	1.26756	7.94829	10.0526	4.45521	1.1624	0.398787	0.759576	0.750219	1.15597	1.19363	3.03437	1.33889	1.80755	1.33721	2.48609	0.695743	1.15302	0.294833	0.288206	3.49318	2.6365	1.60159	0.598913	0.702046	1.03073	0.200304	0.057386	0.236148	0.365497	1.15527	1.03023	0.313006	0.307314	0.374976	0.612016	0.85519	0.703065	3.99162	3.87323	4.04345	0.788802
Seita.1G022800	24.1529	13.7741	97.7052	0.157785	1.79799	0.160116	0	0	0.019997	30.9998	58.9459	39.5189	21.4912	11.0089	15.8821	0	0	0.02683	22.0228	11.2365	9.73402	61.5124	48.751	3.6661	0.875128	0.947493	0.326993	80.0323	52.021	30.5542	8.38866	11.517	7.40206	0	0	0.050757	21.4445	18.0388	19.1141	6.08576	2.25487	9.05144	0.025486	0	0	18.4344	22.1622	28.4683	21.0839
Seita.1G022900	0.104186	0.348659	0.057922	0	0.296959	0	0	0	0.033694	2.15894	1.7508	3.86344	0.114498	3.74779	0.379139	0	0	0	2.00003	2.83608	1.56023	1.47828	0.764272	0.130116	0.047474	0	0.055779	3.19767	5.09138	12.2343	0.044096	1.44591	2.4206	0.068519	0.041283	0.128001	1.32907	2.25574	2.32385	1.0584	0.153317	1.76306	0	0.066518	0	2.26264	3.51327	2.25439	2.09511
Seita.1G023000	44.6147	51.7234	44.7229	22.3504	32.7443	16.0217	0.588227	1.25595	0.529668	1.89322	1.07309	3.159	52.8526	49.6029	63.1982	0.968224	1.84375	1.53442	1.5702	2.66377	1.98952	66.3825	56.3001	30.3551	1.48728	1.05747	0.555135	0.781357	0.906252	0.934594	6.3288	9.54517	12.7854	0.600183	0.556611	0.269539	0.696427	0.739922	0.496622	10.6624	20.4578	21.8606	0.466778	1.00433	0.413142	3.08531	5.16735	2.2684	52.2372
Seita.1G023100	206.691	482.246	95.1363	11.6151	71.7192	5.56497	7.19054	4.28217	3.39956	11.9303	11.8899	16.9867	53.6937	74.1548	122.378	1.47922	3.22951	2.64827	4.37136	5.87791	8.85299	132.46	60.8582	21.8935	0.320978	0.38115	0.934704	18.109	12.2505	9.36952	7.64302	24.5713	20.4312	0.14906	0.245113	0.399125	3.73192	3.82543	2.68861	16.3406	18.2677	10.0572	10.2729	6.65215	4.39213	31.8118	32.7077	11.493	739.747
Seita.1G023300	55.0517	53.8359	55.7446	38.3564	39.1136	34.5414	30.5608	26.2014	26.258	43.0388	43.4182	40.9684	58.0816	53.8337	53.0904	31.1986	31.2589	27.805	48.0167	44.0687	38.6957	46.7626	49.8885	56.3417	23.688	23.7741	24.7671	34.5781	33.7963	24.9917	20.1975	27.0926	26.6134	26.8232	25.6619	26.5396	33.9581	37.8158	35.0221	25.7911	40.3384	34.2433	22.9585	25.2372	25.3158	40.7582	39.9079	39.8872	46.157
Seita.1G023400	1.65632	1.86454	3.01321	2.7591	3.63923	2.93351	5.38975	3.97228	5.26892	3.64264	8.02035	4.22387	2.89458	3.97843	5.19599	4.64926	6.1905	3.99749	4.00583	2.94153	3.67511	6.47528	6.99477	1.80122	6.66477	7.32122	5.36191	6.98946	9.0752	3.90742	6.32735	10.937	7.32907	5.27443	4.37277	5.39658	4.92835	4.12127	4.30912	8.11312	6.22471	6.15145	3.73413	2.75417	2.83027	2.67864	1.90403	1.8257	3.0871
Seita.1G023500	20.2393	17.2166	23.7056	30.0998	26.9632	27.9897	8.93085	11.4292	8.87154	24.3358	19.0528	21.6411	21.2792	18.3898	23.7492	11.5364	9.39416	9.01745	28.6684	29.5746	26.4741	47.6209	39.8103	30.3621	6.70528	8.17141	8.70703	20.5828	19.8553	15.5538	14.7164	25.6374	30.4412	8.67464	6.66441	7.86479	30.111	34.4163	29.9715	18.4025	32.0441	31.2528	8.57505	6.35441	8.91822	25.8277	28.4013	25.9578	25.7891
Seita.1G023600	0.708518	1.0109	1.13982	1.03105	3.37121	0	0	1.92359	0	0	0	0	0.426718	0	0	0	0	0	0	0	0	0	0	0.469001	0	0	0	1.79606	0	3.51202	0	0.419408	0	0	0	0	0	0	0	0	1.46212	0	0	0	0	0	1.62295	0	0
Seita.1G023800	21.038	31.453	28.6092	63.1623	36.9026	60.764	57.6275	58.4121	52.9431	48.6698	38.8645	53.3094	23.2753	20.3818	28.4783	65.9388	62.9238	57.8444	54.4462	55.2295	51.2124	69.5938	58.9486	35.3324	101.617	89.3395	68.7259	46.3462	42.8364	45.4809	33.5323	28.2671	36.9755	66.2729	68.8939	60.0435	42.4346	43.575	38.7297	26.5069	37.5176	33.4212	51.1688	47.8097	45.671	51.1225	53.3198	45.4917	72.5495
Seita.1G023900	27.3824	25.6481	28.1245	30.7146	20.9201	24.0906	19.9327	17.456	18.8992	16.1424	17.9155	19.1016	15.6746	27.0829	29.4611	15.1088	18.388	15.1223	15.104	15.249	10.1183	22.0758	23.697	26.9442	20.2975	17.4916	19.4094	15.8663	17.85	15.8639	26.1656	13.7862	16.8316	19.9127	21.4767	15.0508	16.5296	15.9967	17.6316	16.4684	20.3994	18.0486	13.6858	15.5491	13.7796	17.5999	16.389	16.7276	26.6234
Seita.1G024000	17.5028	14.0036	15.1092	20.9359	18.7471	17.8885	0.77631	1.04162	0	4.64955	8.71727	2.57225	15.1311	23.1022	9.48679	1.66796	1.72456	1.12289	1.96732	1.8808	2.4186	6.71985	7.68986	24.8603	4.61343	4.95174	2.30998	5.08315	5.15067	1.41276	2.04354	7.57042	2.90222	2.213	2.73334	2.90042	0.76354	1.36959	0.840033	7.03	20.0098	10.3759	0.871591	1.85866	1.26544	2.94889	3.51414	3.2306	7.56651
Seita.1G024100	9.4811	8.91698	8.96994	15.2743	15.3433	16.6679	52.0064	44.6224	57.256	1.81362	1.88685	1.31697	1.82405	3.08489	8.87623	38.0501	40.0243	43.9579	0.878175	0.497687	1.32769	1.68563	2.39778	3.57353	22.8295	21.7188	39.924	4.30872	4.86318	2.93779	6.20228	4.97554	8.4834	67.0766	78.1062	66.612	4.22994	3.32485	5.22201	4.4813	8.79063	11.2447	78.6999	61.4516	77.9989	0.748313	0.777864	0.925517	4.97007
Seita.1G024200	0.157231	0.121244	0	0.389563	0.255819	0.41016	0.092574	0.12148	0.131163	0.250625	0.29505	0.116412	0.05254	0.043406	0.106817	0.121867	0.250834	0.132064	0.205603	0.104414	0.180674	0.161754	0.218949	0.045604	0.387163	0.670657	0.787174	0.335055	0.478867	0.439985	0.500972	0.188791	0.319611	0.456708	0.375968	0.459801	0.200897	0.164405	0.299016	0.351728	0.128659	0.362414	0.078075	0.076158	0.190408	0.31001	0.098015	0.130925	0.12524
Seita.1G024300	18.9008	16.2857	15.0473	12.606	11.1962	11.3471	10.7915	8.56319	17.5854	12.1755	9.48359	17.4734	11.8344	15.7172	16.2208	7.73341	8.85588	8.15273	10.1406	12.4779	11.8506	7.93906	8.09697	13.4987	4.16976	4.86177	13.2087	7.07761	7.68135	14.8745	1.55053	3.36852	7.67775	16.008	16.7007	15.9604	9.17471	9.72976	11.1578	5.51114	9.31686	8.13492	12.1157	10.9152	9.98427	15.6658	16.1507	13.2232	11.0947
Seita.1G024400	2.42517	3.90926	4.72142	5.46815	6.45399	5.9971	0.816248	1.59612	0.520053	4.85876	5.64197	5.00246	8.2219	5.47265	6.77419	0.961864	1.03361	0.472171	3.23315	3.25101	2.56995	16.4138	15.5602	6.50781	0.978391	0.626837	1.07007	9.99412	14.2915	7.80033	7.2627	17.4293	9.9548	1.54164	1.03334	1.10881	7.18058	8.21176	6.98269	14.0156	4.87599	6.7143	0.59231	0.695597	0.739587	2.97762	3.53038	3.38718	9.98287
Seita.1G024600	11.1033	10.4471	10.2621	7.08616	7.60288	7.31626	4.76487	3.83654	4.33648	10.1834	6.90074	7.10215	10.7687	10.1844	8.55896	5.5415	6.96919	6.86157	8.28407	6.69629	5.70899	6.06393	8.17606	11.0198	6.16034	5.37041	5.20646	5.61949	4.69787	4.58689	4.52389	5.04001	5.74127	6.62834	5.13512	6.1544	7.52349	8.20655	7.72266	5.33366	6.9767	6.41334	5.37702	5.78962	5.64352	9.16033	8.76353	8.43256	6.15752
Seita.1G024700	32.9497	29.8965	37.6754	38.1395	38.48	39.8001	33.2156	30.8806	27.3366	26.3471	31.2553	25.7772	34.6438	30.0847	29.7722	35.7585	36.259	30.874	25.7222	23.8928	24.0453	39.1163	37.7301	32.6563	38.3984	36.6933	33.4138	32.1328	35.985	22.6842	59.4462	35.5524	30.5893	31.9183	33.5099	33.1311	28.0822	30.5762	28.2855	35.3162	36.1478	35.5485	26.601	31.6745	33.3018	20.4409	22.6936	21.3762	29.4906
Seita.1G024800	0	0	0	0	0	0	0	0	0	0	0	0	0	0	0	0	0	0	0	0	0	0	0	0	0	0	0	0	0	0	0	0	0	0	0	0	0	0	0	0	0	0	0	0	0	0	0	0	0
Seita.1G024900	0	0	0	0	0	0	0	0	0	0	0	0	0	0	0.017867	0	0	0	0	0	0	0	0	0	0	0	0	0	0	0	0	0	0	0	0	0	0	0	0	0	0	0	0	0	0	0	0	0	0
Seita.1G025100	16.9843	37.9787	3.61513	0.319099	17.5894	0.098628	1.71542	0.237423	0.743946	5.4738	8.16578	7.70396	10.8879	16.7254	17.3884	2.63764	2.77983	3.2489	10.0447	6.24352	10.1112	6.7802	7.78637	14.8039	2.23599	1.57013	2.16044	1.5333	4.89863	1.49433	217.977	18.0534	13.8072	1.02913	0.711752	0.266737	10.8541	12.6645	13.2903	24.7604	9.04021	5.34229	0.098611	0.232747	0.155978	3.36847	2.93261	2.74667	86.7903
Seita.1G025200	0.078648	0.080707	0.072338	0.058127	0.164994	0.110977	0.084493	0.124384	0.245531	0	0	0	0	0	0	1.2209	1.05313	0.951457	0	0.032126	0	0.018488	0	0	0.361283	0.675672	0.425337	0.089592	0.072376	0.118126	0.354172	0.136387	0.139634	0.403653	0.534142	0.484094	0.032613	0	0.090846	0.044872	0	0	0.443922	0.200851	0.408844	0.037683	0	0.011647	0
Seita.1G025300	0.939044	1.06811	0.864796	2.74736	1.40018	3.05459	0.199547	0	0.127209	2.73934	2.82439	1.38543	0.741369	0.510955	0.595648	0.041156	0.05381	0.113119	0.606837	0.945633	0.654339	0.201621	0.08785	1.15458	0.345624	0.745433	0.729309	3.26873	4.1482	1.71971	0.259792	1.18077	0.645491	0.103838	0	0.212193	1.96328	1.44897	0.899352	0.60366	0.33487	0.247853	0	0	0	0	0	0	0
Seita.1G025400	5.1937	5.8474	7.97709	4.28999	7.02638	4.02778	2.477	1.12342	2.13616	4.00379	1.81646	4.81646	1.90587	2.40703	7.1577	1.27903	1.48101	2.25023	2.95563	2.90712	3.40477	4.97376	5.39926	2.41735	1.38383	1.91949	2.29204	5.5181	2.99558	1.93922	8.87817	4.59569	10.6662	1.30354	1.32651	2.42414	2.54393	2.85762	1.99426	4.17039	2.88359	5.71673	2.35676	2.11865	3.02748	3.80387	3.77382	4.41429	4.73801
Seita.1G025500	0	0	0	0	0	0	1.67665	1.10739	3.924	4.90766	4.41663	5.13914	0.842582	0.835783	10.8401	2.2664	2.04883	2.64186	3.67402	3.0658	3.86801	6.75778	6.49463	2.48606	1.71061	1.59844	4.56749	3.61136	4.59462	5.50278	6.9942	4.69784	21.0201	2.93027	2.44844	2.70174	4.4415	5.46426	3.99986	6.03514	4.98027	7.04282	2.04975	2.11749	3.43354	5.13167	4.43682	3.38808	5.67539
Seita.1G025600	7.2316	6.8239	10.1616	10.4552	11.9974	9.81006	12.198	6.84216	15.6726	12.5121	8.68939	12.157	1.7594	0.752081	5.52644	15.1277	15.6633	16.6106	12.1625	11.518	12.1167	4.39655	6.37132	2.72212	3.76881	5.51997	7.0872	7.92078	10.0001	9.34768	4.25977	2.00648	8.19124	9.53637	9.98001	10.3093	13.1032	11.6194	12.4763	6.07887	7.35586	10.6693	9.58643	10.3735	14.4548	11.1817	9.24461	10.0482	3.5175
Seita.1G025700	0.326882	0.306724	0.564346	0.710148	0.160263	0.443447	0.000301	0	0.004014	0.006774	3.5e-05	0.002414	0	0	0.011061	0.001272	0.003148	0.092537	0.001375	0.007945	0.005827	0	0	0.000221	0	0	0.001072	2.4e-05	0	0.003761	0.096015	0	0.000728	0.014353	0.008529	0.006767	0.001644	0.000969	0	0	0.000326	0.000949	0.005324	0.065234	0.008399	0.002674	0.003954	0.00506	0.005821
Seita.1G025800	6.40702	4.69404	4.11576	162.771	132.602	229.252	0.211859	0.078178	0.201685	34.9584	38.8005	76.4858	2.56829	8.24721	2.46024	0.156207	0.264642	0.371026	15.2296	24.8216	24.1179	6.74544	5.42441	15.4562	11.8023	12.4671	21.027	86.9175	96.5545	179.088	29.0187	31.4176	51.2546	21.5209	7.53734	12.0205	123.142	85.2995	110.053	106.119	59.9946	94.3021	0.101971	0.189066	0.055162	7.20005	8.882	11.6009	6.60926
Seita.1G025900	0.058719	0.117563	0.045001	0.254699	0.6715	0.510642	0	0	0	0.088984	0.693065	0.297711	0.097112	0.089416	0	0	0	0	0.181142	0.050948	0.040731	0.148082	0	0	0	0	0	0.509369	0.464553	1.01898	0.112276	0.061554	0.391448	0.090832	0	0	0.358909	0.345193	0.248237	0.448664	0.454875	0.914863	0	0	0	0	0	0	0
Seita.1G026100	25.7761	23.9178	25.4251	40.7181	36.79	42.5464	31.694	32.4527	31.185	38.1437	31.7057	48.398	29.2041	26.5551	33.7017	38.6003	34.4963	33.3312	49.9953	47.8517	39.2267	32.3128	31.3209	33.2341	60.841	56.2917	48.305	37.6318	37.2523	48.7304	68.0893	55.7174	53.7355	54.4726	59.6366	53.2637	69.5611	75.5534	72.599	52.1189	45.9586	52.8236	31.5656	27.6264	37.0014	45.503	42.9159	41.1518	23.9393
Seita.1G026200	10.0421	9.64529	10.9647	13.5039	12.8746	12.2758	7.77482	6.6823	8.011	7.27668	5.69554	8.68887	8.30114	5.54298	11.1672	9.26495	9.38693	9.66145	7.30741	8.18527	7.76865	11.1962	11.2725	9.25944	8.19154	13.174	11.6411	9.02541	10.185	7.96597	22.995	10.5313	12.386	11.569	12.3664	13.7882	12.2562	11.4721	12.1032	12.2105	10.0381	12.8431	8.70389	7.40808	9.49351	6.86808	6.66609	8.11216	8.45063
Seita.1G026300	0	0	0	0.046561	0	0	0.090197	0	0.159874	0	0	0	0	0	0	0.034247	0.196045	0.050651	0	0	0	0	0	0	0.056062	0	0	0	0	0	0	0.030173	0.027098	0.00792	0.046491	0	0	0	0	0	0	0	0.036036	0	0	0	0	0	0
Seita.1G026400	0.220468	0.342787	0.319381	0.323515	0.544978	0.153449	0.093203	0.047486	0.026438	0	0	0	0.062234	0.064269	0.197813	0.065615	0.129491	0.274422	0	0	0	0.125652	0.192396	0.232937	0.127597	0.061547	0	0	0	0	0.14973	0.062007	0.123864	0.278622	0.084656	0.062136	0	0	0.155065	0.225899	0.457228	0.578115	0.267557	0.304675	0.818396	0	0	0	0
Seita.1G026500	0.290284	0.130864	0.287724	0.291366	0.292633	0.365111	0.390824	0.539579	0.342878	0.182299	0.252478	0.317745	0.134655	0.139059	0.152283	0.11844	0.451141	0.307187	0.180467	0.066826	0.063758	0.179864	0.23818	0.240744	0.402385	1.70574	1.1148	0.673004	0.610933	0.148376	0.092526	0.270702	0.304103	2.4809	2.68932	1.65569	0.180702	0.167415	0.147163	0.222226	0.344706	0.161271	1.26692	0.556982	0.457969	0.122577	0.142589	0.095506	0.084207
Seita.1G026600	1.23109	3.11786	0.503622	0	2.14371	0	0.391766	0	0.085187	0.073771	0.162246	0.01812	0.144543	0.331749	1.89371	0.13294	0.039247	0.099887	0.038691	0.022173	0.0341	1.68014	0.320764	0.273876	0	0.132741	0.07497	0.080017	0.020439	0.052005	0.37437	0.065256	0.984527	0	0	0.018019	0.025694	0.06031	0.187714	0.888592	0.171878	0.452761	0.056676	0	0.093156	0.042881	0.033623	0.086164	3.34688
Seita.1G026700	0	0.167882	0.253369	0.372424	0.522528	0.213686	0.086758	0.162111	0.02103	0.169905	0.227084	0.040943	0.221703	0.044059	0.118467	0.16638	0.14026	0.165437	0.282496	0.006959	0.191491	0.14887	0.354117	0.363781	0.423056	0.185859	0.046083	0.118617	0.679189	0.109742	1.5138	0.446882	0.475874	0.358178	0.149572	0	0.106122	0.243146	0.00854	0.420932	0.202878	0.210214	0.124743	0	0.219956	0.194233	0.146102	0.33303	0.115809
Seita.1G026800	0	0	0	0	0	0	0.095645	0	0	0.084856	0.122093	0	0.108648	0	0	0	0	0	0	0	0	0.192507	0	0	0	0.047692	0	0	0	0	0	0.138327	0	0	0.110624	0	0.07525	0	0	0	0	0	0	0.025251	0	0.085671	0.099174	0	0
Seita.1G026900	0	0	0	0	0	0	0.021829	0	0	0	0	0	0	0	0	0.397225	0.44082	0.342703	0	0	0.388451	0.085973	0.045076	0.569751	0.135476	0.621114	0.097287	0	0.163933	0	0	0	0.013562	0.290338	0.26172	0.259193	0.07583	0.098886	0.093879	0.070815	0	0.022787	0	0	0	0	0	0.036108	0.023479
Seita.1G027000	0	0	0	0	1.37484	0	0	1.18223	0	0	0	0	0	0	0	0	0	0	0	0	0	0	0	0.34648	0	0	0	0	0	0	0	0	0	0	0	0	0	0	0	0	0	0	0	0	0	0	0	0	0
Seita.1G027100	3.12048	2.30618	1.92897	0.732328	1.33173	0.573164	3.11708	1.83794	1.6816	2.25488	4.77149	3.18146	2.5859	3.89776	7.63774	0.491079	0.613276	0.791454	1.53609	1.40298	1.42669	3.63127	2.39932	1.2972	0	0.164004	0.533893	1.57191	1.19302	0.477816	1.31204	3.53264	2.91853	0.29026	0.11709	0.181052	0.490693	1.08176	0.568508	1.99868	1.11289	1.23199	0.937559	0.972489	0.557666	1.53879	1.34065	0.96168	4.14664
Seita.1G027200	0	0	0	0	0	0	0.448873	0.362544	0.388063	1.13802	1.32987	0.636756	0.474761	0.172942	0.810607	0.08173	0.084007	0.200229	0.40386	0.928869	0.390944	0.543321	0.211303	0.157702	0	0	0.064796	0.251785	0.479807	0.321919	0.257393	0.805082	0.811365	0	0	0	0.155869	0	0.279013	0.370297	0.199034	0.208704	0	0	0	0	0	0	0
Seita.1G027300	0	0	0	0	0	0	0	0	0	0	0.147548	0	0.085798	0	0	0	0	0.090563	0.09197	0	0	0	0	0	0	0	0.075669	0	0.097166	0	0	0	0	0	0	0	0	0.212822	0	0.080822	0	0	0	0	0.074977	0.036307	0	0	0
Seita.1G027400	12.104	12.6677	11.8176	15.0038	11.2741	14.5643	5.843	7.99508	7.32072	7.69193	5.59756	13.2709	4.00547	3.81953	10.3552	11.0532	5.64949	6.17807	11.8231	8.68355	9.04453	14.3769	7.42679	4.4405	5.58963	11.0425	8.73044	17.9779	7.2298	11.6273	11.284	12.1867	10.7426	13.8512	13.6024	12.849	15.6831	17.3856	18.1529	11.2974	10.4358	12.1765	8.02671	8.26305	9.73596	13.4044	13.8017	12.4571	16.2205
Seita.1G027500	4.42457	4.9576	7.63282	13.498	8.74984	12.5833	7.70235	6.21771	3.86892	8.30298	12.0998	5.40499	4.83861	2.9517	4.34157	8.3718	5.1756	7.19995	6.83731	7.36752	5.88393	13.1245	11.6577	6.90862	13.4051	13.362	7.25892	8.75929	9.40031	5.048	2.44234	3.39884	3.67978	9.63655	9.3185	8.00648	5.51346	7.51706	5.5106	3.29761	6.53442	6.46179	5.38452	5.12902	5.64279	7.69921	7.17399	8.07668	12.5124
Seita.1G027600	0	0.066784	0	0.079401	0.086406	0.020516	15.8643	22.0365	9.21116	0	0	0	0.121814	0.044088	0	7.49251	7.15063	6.26464	0	0	0.080664	0.138661	0	0.162429	83.3664	63.0115	16.21	0	0	0	0.328773	0.133783	0.223351	21.5093	23.8038	24.7835	0	0	0	0.243976	0.329247	0.465873	10.8769	12.2387	8.59653	0	0	0	0
Seita.1G027700	0.491466	1.40884	0.132479	0.231885	0.760289	0.305033	5.14702	4.59946	4.17404	10.9112	10.246	8.12955	6.69939	3.40726	1.67622	4.03345	3.49493	4.39297	1.50444	1.09988	1.24228	0.491038	0.452108	1.23345	5.81142	6.76968	5.85757	4.90702	4.78265	2.03655	8.6057	4.34346	2.25115	2.14201	2.30229	4.01854	3.17465	2.97975	2.20366	3.08269	1.04023	0.416235	2.41923	3.08981	1.79943	1.35516	1.55047	1.31441	0.941158
Seita.1G027900	1.47725	2.70577	2.14783	2.42868	2.50214	1.70314	0.480749	0.288212	0.517538	0.420482	0.743801	0.448861	1.85159	1.35874	3.22235	0.466648	0.531274	0.550029	0.609779	0.353865	0.339667	2.69962	3.08538	1.0332	0.412444	0.41607	0.634932	1.15397	1.17884	0.721785	2.94229	2.22859	2.54766	0.640763	0.360745	0.662695	0.590881	0.805101	0.825194	2.24613	1.73415	2.22363	0.605402	0.645171	1.27141	0.365163	0.489989	0.327457	3.64689
Seita.1G028000	252.628	225.197	239.173	240.696	174.175	225.855	197.752	147.038	235.359	20.5391	14.9042	29.2552	84.6669	62.6605	191.422	124.368	142.174	151.923	20.3852	25.8774	24.8156	43.7041	47.6128	101.217	44.9312	65.9436	101.269	41.8027	35.6039	66.1147	23.4163	37.9723	92.1916	74.7004	85.5194	106.436	61.8675	55.1612	67.73	50.9395	123.961	85.7806	186.935	175.099	240.877	24.3526	25.8956	20.0444	72.5972
Seita.1G028100	0	0	0	0	0	0	0.377966	0.082919	0.069653	0	0	0	0	0	0	0.157623	0.054186	0.078902	0	0.074277	0.02354	0.170977	0	0	0	0.065637	0.107239	0	0	0	0	0	0	0.065296	0.262906	0.067999	0	0	0	0	0	0	0.128126	0.276044	0.203227	0	0.06579	0	0
Seita.1G028200	0	0	0	0	0	0	1.34332	2.14895	0.545245	0	0	0	0	0	0	3.3	1.49575	1.66232	0	0	0	0	0	0	2.0471	2.97229	7.19562	0	0	0	0.255213	0	0	5.16303	5.45073	3.98072	0	0	0	0	0	0	0.071529	0.646102	0.764977	0	0	0	0
Seita.1G028300	50.8833	81.2559	73.4865	166.505	126.789	191.726	87.8865	78.9984	80.6343	116.821	132.556	102.41	51.8459	40.4377	72.4018	99.9035	97.322	85.1328	106.802	109.302	99.3352	215.349	178.67	75.3962	182.986	157.316	121.782	126.656	142.878	94.1742	269.236	148.943	142.983	127.586	122.083	121.364	109.002	110.403	110.354	137.608	114.49	120.815	68.713	65.4506	71.8603	86.6125	99.0167	89.6101	188.058
Seita.1G028400	4.06132	4.58471	7.94268	2.3259	6.08255	2.91646	6.47092	8.03966	8.59417	3.30373	2.69425	4.21023	4.06511	2.61625	8.11901	4.93847	5.81554	6.17639	1.56007	1.13482	1.84815	8.55718	8.21119	1.67626	5.17158	5.47454	5.454	2.87732	2.55073	2.32753	4.31686	3.34151	5.22947	1.94278	1.72263	2.75494	1.16684	1.36026	1.64423	3.4152	2.38005	2.1626	6.52748	6.37713	6.31656	3.11099	4.40803	2.02295	4.90442
Seita.1G028500	0	0	0	0	0	0	0	0.154862	0.159512	0.119952	0.133513	0.062908	0	0	0	0.026246	0.027068	0.032845	0	0.055375	0.051158	0	0	0	0.007483	0	0.245574	0	0.07001	0	0	0	0	0	0	0	0	0.058624	0	0	0	0	0	0.09617	0	0	0	0.059585	0
Seita.1G028600	5.76069	3.85021	4.01082	4.94094	5.35263	4.29932	0.278544	0.125209	0.417132	0	0	0	0	0	0	0.515454	0	0.128887	0	0	0	0	0	0	0.160668	0	0	0	0	0	0	0	0	0	0	0.118117	0	0	0	0	0	0	0.139005	0.17156	0.264964	0	0	0	0
Seita.1G028700	4.11575	4.36128	16.6698	1.58928	10.5128	2.81957	21.976	18.0118	13.2809	21.8398	19.4891	18.7662	2.98377	1.61658	6.4167	65.2565	97.395	184.101	13.9035	8.26095	10.2317	33.496	15.992	29.5582	25.5717	24.1259	46.0302	8.99917	6.8184	2.36206	0.220496	0.555591	2.51402	9.75417	42.707	11.3798	9.58627	12.0034	9.4487	1.89935	1.3234	6.03781	39.6132	36.0784	40.0376	2.3153	17.0996	15.1909	4.86126
Seita.1G028800	0	0	0	0	0	0	4.0167	1.86274	2.92005	1.1488	2.18312	1.48452	0.559524	0.135027	0.270244	13.6179	10.2873	9.76067	0.989021	0.742333	0.736442	2.61108	2.73185	3.22178	0.333045	0.262484	0	1.21108	1.30991	0.322031	0.176382	0.045069	0.173307	4.62113	4.03589	0	1.83048	0	0	0.49336	0.731336	0.782529	2.73487	2.42781	2.65722	0.853746	0.656798	1.13317	0.276446
Seita.1G028900	4.44502	2.75232	10.4817	3.7694	9.10209	5.94329	19.9834	26.3302	10.1313	40.5277	75.5297	21.5247	22.1333	13.2141	5.56324	25.7656	27.1623	19.1038	34.3741	20.4809	18.104	27.6684	22.1242	18.6346	37.1661	21.3088	7.58421	54.3136	72.3185	19.6763	5.80605	7.13433	10.3592	7.19384	7.48647	8.13487	76.1111	79.1286	73.4938	9.64215	5.49287	16.9077	9.62842	16.0547	11.4094	16.1014	19.2477	18.9329	2.6335
Seita.1G029000	5.29898	5.16061	5.91308	7.27176	6.43715	5.94965	3.64793	3.22645	4.18382	7.96966	6.71259	6.70687	6.72366	4.57792	5.77695	5.76957	7.24827	7.80622	7.04715	7.58178	7.30158	10.1935	7.08082	6.24321	6.43957	5.63591	8.01152	6.60771	7.55903	8.53895	19.041	10.3072	11.382	7.69167	6.49236	9.9858	9.47518	8.92871	8.45638	11.678	9.02563	15.5279	8.52909	7.26107	7.76436	12.7695	9.25934	11.7456	13.5454
Seita.1G029100	29.7408	30.1773	28.5288	33.2136	29.0515	28.6284	26.5799	27.8836	14.4799	42.9569	38.5457	26.1572	31.4876	25.9907	19.7972	32.0512	28.2724	29.6964	41.3199	40.3168	41.0693	26.8706	28.517	31.9055	39.453	35.2834	17.6101	34.6876	37.5007	28.8069	22.4252	24.0121	17.9487	26.5814	29.8857	26.0005	49.1621	52.9897	49.7077	25.6239	33.4811	28.6565	15.1375	19.0757	18.198	31.8689	34.4402	31.4272	27.1641
Seita.1G029200	0.631753	0.483875	0.043289	0	0.271598	0	0	0	0	0.042888	0	0	0	0	0	0	0	0	0.048086	0.133724	0.125037	0.282164	0.40125	0.362764	0	0	0	0	0	0	0	0	0	0.040167	0	0	0.04525	0.066942	0	0.1479	0.389741	0.609726	0	0	0	0.105744	0.20986	0.221501	0.084065
Seita.1G029500	1.76566	1.27882	1.81152	0.705536	0.891486	0.974301	0.475432	0.254987	0.152912	11.0891	21.1038	12.6244	7.23027	12.0013	0.703763	0.051844	0.10744	0	9.78645	10.492	9.20597	3.32192	4.01943	9.61721	0.84894	0.772927	0.888013	6.84754	7.8728	8.09821	0.113432	0.17109	0.69997	0.665429	0.374256	0.124127	6.0528	7.55258	6.56253	1.6374	0.774813	3.66296	0.179104	0.32619	0	6.59483	6.84134	6.16669	2.094
Seita.1G029600	0	0	0	0	0	0	0.807371	2.47972	0.423753	0	0	0	0	0	0	1.76073	3.58683	2.9567	0	0	0	0	0	0	8.33393	0.809643	5.63612	0	0	0	0	0	0	16.058	7.20922	2.58993	0	0	0	0.359174	0	0.208735	0.262583	0.474328	0.37469	0	0	0	0
Seita.1G029700	0	0	0	0	0	0	0.04392	1.07089	0	0	0	0	0	0	0	1.70605	12.9371	51.9542	0.06005	0	0	0	0.030231	0	42.9596	10.4734	75.6406	0	0.009517	0	0.735082	0	0	94.6857	46.5579	5.88736	0.033905	0	0	0.009895	0	0	0	0.17553	0	0	0	0	0
Seita.1G029800	0	0	0	0	0	0	0.050997	0.054744	0	0	0	0	0	0	0	0.052907	0.092235	43.3588	0.02925	0	0	0	0.001339	0	0.073531	0.099227	34.9324	0	0	0	0.017922	0	0	0.103955	2.6596	3.35275	0.010259	0	0	0.020301	0	0	0	0.091921	0	0	0	0	0
Seita.1G029900	0	0	0	0	0	0	0	0.371536	0	0	0	0	0	0	0	1.52059	11.7817	111.368	0.128965	0	0	0	0	0	12.446	4.2804	21.9677	0	0	0	0.218553	0	0	69.4908	22.1911	6.95802	0	0	0	0.086022	0	0.053575	0	0.212919	0	0	0	0	0
Seita.1G030000	0	0	0	0	0	0	0	0.231067	0	0	0	0.013828	0	0	0	0.898442	5.05737	52.6446	0	0	0	0	0.007382	0	10.6295	2.25402	5.22122	0	0.009296	0	0.465221	0	0	23.4152	7.58473	2.93092	0.00828	0	0	0	0	0.02799	0	0.063738	0	0	0	0	0
Seita.1G030100	0.03111	0	0	0	0	0.032924	0.830875	17.4898	0.613222	0	0	0	0	0	0	5.69121	22.5988	22.1981	0	0.076248	0.036246	0	0.034508	0	30.7921	1.46427	22.0167	0	0	0	0.294415	0	0	70.5588	12.2413	2.96198	0.077403	0	0	0	0	0	0.1963	1.75751	0.039116	0	0.082188	0	0
Seita.1G030200	0.825981	0.624438	1.48317	0.991453	1.39255	0.787868	1.20255	1.06984	0.834579	1.96264	2.99743	1.27685	0.748012	0.445634	0.925793	2.39941	1.43805	1.00455	1.35983	1.48423	1.03498	1.2304	1.61228	0.575951	0.958258	1.29301	1.07235	1.24965	1.44379	0.469158	4.38481	0.82712	1.5561	0.921415	0.905857	1.62801	0.752155	1.23689	1.35822	1.60236	0.494003	1.38266	0.752434	0.733995	1.02448	1.26327	1.06178	1.29474	0.626431
Seita.1G030300	3.38159	3.09827	4.02534	3.76776	3.80819	3.94116	4.58406	3.57648	6.07207	4.21587	4.53696	3.34569	2.41202	2.24061	4.39677	5.16277	5.79122	5.43275	2.3765	2.92355	3.10292	4.75167	4.58296	1.87555	2.94558	3.67359	6.51788	3.34764	3.95593	3.47877	15.4707	3.36127	5.65065	7.5967	8.37186	7.25156	4.11645	4.39413	3.22289	5.13869	3.73275	6.18488	6.40695	5.55258	6.85681	3.04664	2.76957	3.26869	2.44244
Seita.1G030400	2.31159	1.79083	2.89999	2.49729	2.2324	2.29267	3.23596	1.91231	2.7975	3.42426	2.02202	3.74384	1.74785	1.14706	4.27567	2.41717	2.4027	2.60061	2.98278	2.65824	3.13756	2.08114	3.86637	0.831206	1.18662	1.92277	2.57577	2.66309	2.78811	2.90116	3.78088	2.16541	3.30263	3.53263	3.55202	3.67026	2.73841	4.48193	3.47254	1.75119	2.53918	4.11282	2.92499	1.88499	3.30593	2.51022	1.64023	2.44161	2.0245
Seita.1G030500	1.6933	1.27794	1.36549	0.36392	0.093815	0.152037	1.2634	1.91481	0.658393	2.30734	8.1167	0.144806	0.34359	0.111693	0.098399	2.14732	2.53509	1.97158	4.7051	0.133222	4.58025	0.386827	0.146077	0.939604	0.885873	2.60522	0.507775	0.668183	0.289884	0.169525	0.486238	0.064852	0.028292	1.33855	1.53273	0.726496	0.036177	2.02552	1.87036	0.377999	0.537653	0.729469	0	0.268594	0	0.5583	1.13016	1.96037	0
Seita.1G030600	2.59298	2.15037	1.81071	0.253152	1.43181	0.566846	0.69391	0.96603	1.11621	0.061578	0.162487	0.15446	0.256985	1.9055	1.48858	0.87758	1.25086	0.656133	0.03452	0.063999	0.03017	3.18105	3.03986	2.10955	0.280661	0.394918	0.367754	0	0.036471	0.105704	0.746639	0.116442	0.225647	0.258989	0.298289	0.159156	0.213144	0.127457	0.062216	0.212287	0.761289	1.04196	1.12185	0.677395	0.56012	0.130753	0.046379	0.080782	1.70266
Seita.1G030700	0.084674	0	0	0	0	0	0	0	0.093198	0	0	0	0	0	0	0	0	0	0	0	0	0	0	0	0.26544	0	0	0	0	0	0	0	0	0	0.094334	0	0	0	0	0	0	0	0	0.046548	0	0	0	0	0
Seita.1G030800	0.192915	0.180251	0.206044	0.098011	0.1132	0	0.23062	0.032551	0.111432	0.052225	0.084517	0	0.049415	0	0.519577	0.071539	0.160501	0.019847	0.072723	0	0	0.464188	0.195278	0.080821	0.155991	0.299259	0	0	0	0.142757	0.309733	0.404291	0.138901	0.136674	0.144988	0.14277	0.281418	0.074823	0.027003	0.35092	0.058517	0.068394	0.120629	0.17852	0	0	0.046486	0.042907	0
Seita.1G030900	4.38655	4.16026	5.16366	3.1846	4.98388	4.59703	4.69274	3.01285	3.00495	8.2984	5.95294	5.63009	2.23787	2.02778	2.79656	4.57203	4.81278	3.36174	7.91988	6.17372	9.14859	4.7106	4.32733	3.9764	3.33479	4.98127	3.40364	8.31904	7.02637	6.61427	4.26669	3.63308	2.91339	5.25146	5.53004	4.54152	13.2444	15.6097	11.241	3.63621	4.32102	3.54988	2.57652	3.58734	3.24529	5.13964	8.2041	8.13962	2.17749
Seita.1G031000	21.3474	22.6358	28.8165	27.8336	27.1351	31.9717	24.0314	23.2233	18.4138	22.6903	22.8653	16.0153	16.8189	16.7001	19.4458	29.7598	28.1458	27.4785	21.5846	19.1635	19.8192	34.4526	35.7732	23.204	28.3643	29.9119	22.8323	31.5041	36.3601	17.0642	59.1329	45.4576	26.9927	45.6485	41.5917	45.2931	40.2926	42.1753	39.5561	56.1212	33.5859	35.0684	21.3166	25.8136	24.7288	16.4433	14.8081	18.6331	33.4336
Seita.1G031100	12.1355	9.14042	11.9698	5.62927	7.34055	6.28423	39.0237	63.4998	24.2515	65.6447	104.178	69.7344	49.5943	36.3149	14.1154	11.2841	15.3229	16.8419	15.5061	12.2607	13.6462	13.7024	11.7039	42.3991	1.09959	0.74942	0.429635	24.1886	17.4196	8.25716	3.70666	4.30629	2.84961	0.246359	0	0.387085	5.37734	6.0012	6.20821	2.10221	2.98572	2.629	9.01399	14.7586	6.2167	27.5796	36.1651	27.1548	2.89911
Seita.1G031300	21.0828	18.0795	24.4101	16.8076	15.9103	18.2988	22.2996	22.857	17.1006	12.6403	14.4888	10.52	25.4099	22.3709	18.7999	22.4804	24.5635	20.1682	13.4384	10.1321	13.508	20.1419	18.6079	21.8391	26.2622	28.5174	18.1162	14.1278	13.0596	7.7699	19.8622	15.4015	11.7459	19.481	21.8645	22.2052	9.86852	10.0781	9.84367	12.1891	16.1687	15.5388	21.4284	19.997	24.1327	12.8547	11.171	10.2443	14.9706
Seita.1G031400	0.174386	0.179037	0.11447	0.028584	0.239784	0	0.053553	0.073909	0.108575	53.7267	99.9965	64.9023	0.061476	0.09523	0.111861	0.419573	0.517608	0.485597	60.4106	55.7969	65.7221	0.035153	0.260613	0.233231	0.311026	0.082905	0.120094	22.405	23.9058	39.3567	0	0.185238	0.363881	0.109909	0.059157	0.03069	20.1763	18.8036	24.1867	0.028955	0	0	0.171421	0.143215	0.062676	40.8169	48.5657	48.1801	6.91442
Seita.1G031500	0.027201	0.028483	0.025529	0	0	0	0.490719	0.525338	0.362825	8.74412	12.045	8.82797	0	0.03535	0	0.504299	1.26177	1.20403	16.0158	16.9174	22.5416	0.039148	0	0.03714	0.152283	0.161415	0.324636	0.72065	0.632276	4.40314	0	0	0	0.811211	0.444653	0.764984	2.06311	2.23068	2.64021	0	0	0	0.396285	0.212473	0.191711	6.54622	7.9538	8.34824	0.192443
Seita.1G031600	28.8645	21.7205	22.1786	29.6118	26.6383	21.5024	8.49264	6.6436	7.64437	19.2193	13.4896	18.7563	13.0136	37.455	15.6355	6.97151	7.55622	5.99997	13.4575	13.1281	17.7102	10.5152	12.4536	38.2122	3.6216	3.43396	5.67002	8.31404	10.3634	4.09707	5.27	9.10452	9.83926	3.4732	3.27691	2.93392	5.31816	4.14805	5.88182	5.52398	39.7342	23.9055	11.5741	12.5799	10.1965	19.3764	21.2223	19.1903	9.90544
Seita.1G031700	28.5117	24.7249	30.8505	41.9714	36.199	45.8247	18.4319	26.9691	21.8395	23.4201	33.0984	23.7605	23.9378	31.288	29.7859	33.1406	30.5921	29.3933	40.3231	28.9606	25.4067	28.8657	39.2767	38.925	43.9718	39.8003	28.395	24.1612	37.2775	26.1501	40.3851	47.4167	42.7196	30.7889	37.8741	33.0817	46.0181	52.4227	46.924	43.9452	48.5161	33.1771	21.1858	22.2718	24.2311	27.0708	24.7768	26.7759	15.5952
Seita.1G031800	37.3029	39.1813	43.1861	55.3593	51.5743	54.7281	44.8879	37.5232	58.928	40.9209	34.5581	42.1532	32.7054	29.7923	48.5281	40.7304	43.8874	41.7787	37.7859	34.6155	34.8101	52.681	56.9043	41.3335	49.0162	52.5772	66.6918	54.4475	52.0897	48.5258	102.559	50.5183	73.2537	44.0746	39.2232	46.4659	47.6299	49.7826	46.4183	52.5977	46.3642	53.2611	40.6907	34.8588	41.5269	37.3449	33.1502	32.87	46.9787
Seita.1G031900	15.485	15.4811	17.5028	18.2014	16.9656	19.2199	19.2959	16.3534	18.6191	19.01	19.0508	17.157	18.2889	15.3358	17.1317	18.3463	17.8846	16.1244	18.4501	17.3374	13.627	18.9705	20.8822	17.6486	18.4999	18.8621	16.3083	23.7944	23.5845	13.7862	24.7638	18.0493	16.4801	18.7021	17.6971	22.0641	16.4398	19.7096	19.0193	16.5713	15.3252	17.4673	16.7847	15.7088	17.5071	17.169	14.9347	14.3671	16.9526
Seita.1G032000	39.1953	29.4607	34.2278	37.4707	48.1196	43.9088	30.2168	20.0616	30.2349	66.548	65.6807	66.9047	32.872	41.9298	46.3114	28.6746	30.6168	32.3606	73.508	68.628	82.0948	35.7787	32.7552	50.6752	14.0878	16.1445	21.4885	88.0706	83.1372	97.3743	14.1621	33.7167	55.7282	14.1215	12.3372	16.2538	78.5883	74.4374	74.7738	66.4119	69.2394	66.0331	24.1203	24.5751	21.4066	58.5533	55.732	74.4362	18.3672
Seita.1G032300	125.116	59.9144	211.169	181.928	393.828	449.911	1.24349	0	0.664111	0	0	0	0	0	0.242743	1.66204	0	0.01393	0	0	0	0	0.956463	0	0	0	0.074898	0	1.05375	6.90095	0	0	0	0.607691	0	0	0	1.00198	2.38155	0	0	0.395986	0.133172	0	0	0	1.73285	0	0
Seita.1G032400	12.4644	12.8104	15.8135	21.5475	19.4246	19.5396	13.288	12.9899	9.36268	12.2971	12.1316	10.549	11.7995	12.5874	13.8638	16.6279	18.0204	16.9562	13.6413	13.0344	11.4314	20.3232	15.9469	13.4682	18.8254	19.1359	18.1677	15.1083	15.8475	10.4225	23.6492	18.2187	14.1816	15.9177	20.0349	21.8612	15.6184	17.0894	14.9521	16.1852	14.5197	15.7555	13.4129	12.7936	12.5054	12.7652	10.1985	11.8233	15.0234
Seita.1G032500	42.1433	42.8071	41.7623	45.898	35.6599	44.8363	41.3032	33.1254	32.5853	38.2369	38.9477	39.7618	37.6804	35.2837	44.797	34.2814	34.6441	33.5946	46.0229	43.4712	35.3732	37.0652	38.9135	40.8716	33.6271	33.7345	35.8593	37.0157	37.0383	32.0742	42.2592	37.429	36.1851	37.9166	35.3111	41.8903	39.0963	40.4968	38.9376	36.0215	41.511	37.8575	30.6032	32.5805	31.6788	38.7086	36.0849	40.6668	50.8124
Seita.1G032600	3.73553	3.62658	3.77822	6.66269	6.01446	5.58812	4.38872	3.84067	2.44622	3.53118	3.09924	2.66625	3.84233	2.42498	2.45778	4.3007	5.14161	4.01945	3.05942	2.32009	2.36405	4.73326	5.16199	2.79866	6.39281	6.93175	4.51606	4.44828	5.99557	3.43872	7.56002	4.86177	4.74902	4.61682	5.82425	4.68725	3.51907	4.61426	3.21496	4.41431	2.87781	5.29926	4.6739	3.69343	4.43452	5.06293	3.86647	3.29771	4.42825
Seita.1G032700	0	0.162504	0.072341	5.42264	3.03343	8.4683	0.085063	0.093918	0	0	0.168256	0.136797	0	0	0	0.372347	0.383301	0.459357	0.104673	0.546601	0.070726	0.218139	0	0.388475	0.275176	0.56318	0.644754	1.16896	0.992704	4.19338	0	0.160454	0.084205	0.461366	0.560652	0.678235	3.78667	3.36514	4.47234	1.33961	1.13562	0.473299	0.16002	0	0	0.076728	0.070317	0	0
Seita.1G032800	17.968	18.9092	22.995	31.7666	24.2207	27.6654	26.9844	29.9941	28.6543	25.1738	19.4192	28.8165	29.4176	21.603	30.9642	20.0973	19.2856	15.7084	23.9458	23.6245	20.0489	25.3617	24.397	15.7583	54.1087	45.4986	46.1923	23.7321	23.0845	25.2391	33.5335	32.4432	31.8816	35.8967	40.6941	31.887	27.0641	29.6086	27.3381	21.4805	18.6571	18.2405	21.8375	19.8674	25.9844	33.4191	34.369	30.4687	25.0446
Seita.1G032900	0	0	0	0	0	0	0	0	0	0	0.110189	0	0	0	0	0	0	0	0	0	0	0	0	0	0	0	0	0	0	0	0	0	0	0	0.047257	0	0	0	0	0	0	0	0	0	0	0	0	0	0
Seita.1G033000	0.104675	0.188579	0	0	0.111001	0	0.094215	0	0.083855	0.040727	0.057858	0.044083	0.389302	0.906362	0.714397	0	0	0	0	0.021523	0	0	0.058444	0	0.149959	0.058225	0.297262	0.094193	0	0	0.0446	0.08617	0.023445	0.13576	0.142627	0.108056	0	0	0	0.020404	0	0	0.037167	0	0	0.057809	0	0.015606	0.322302
Seita.1G033100	0	0	0	0	0	0	0	0	0	0.117348	0.192311	0.3954	0	0	0	0	0	0	0.075182	0	0.161895	0	0	0	0	0	0	0	0.054437	0.012416	0	0	0	0	0	0	0	0.06745	0.032845	0	0	0	0	0	0	0.134101	0.394193	0.147723	0
Seita.1G033200	0	0	0	0	0	0	0	0	0	0.40533	0.723615	3.11199	0	0	0	0	0	0	0.389065	0.421264	1.01255	0	0	0	0	0	0	0	0	0.032394	0.120575	0.035288	0.10997	0	0	0	0.05887	0.097481	0.108045	0.079983	0	0	0	0	0	0.182511	3.21106	0.221494	0
Seita.1G033300	0	0	0	0	0	0	0	0	0	0.466343	0.558726	0.146734	0	0	0	0	0	0	0.203165	0.343407	0.210647	0	0	0	0	0	0	0.230551	0.593255	0.167898	0	0	0	0	0	0	0.126818	0.072026	0.282161	0	0	0	0	0	0	0	0	0	0
Seita.1G033400	4.85387	4.73692	5.40979	7.42558	6.65242	8.30293	3.27477	3.32598	2.64323	3.64707	6.48142	2.46914	6.75671	4.13081	3.10531	3.60603	3.17086	3.00748	3.29209	3.32502	2.95836	7.45754	8.6846	6.03907	6.08288	5.75549	3.49988	6.46127	7.22851	3.58258	16.7902	9.29139	5.75621	3.52229	2.80975	3.84368	4.27691	3.4586	3.6156	7.51111	5.0374	5.15701	2.23707	2.64761	2.13909	2.19946	2.88991	2.91303	4.79469
Seita.1G033500	0	0	0	0	0	0	0	0	0	0	0	0.039704	0	0	0	0	0	0	0	0	0	0	0	0	0	0	0	0	0	0	0	0	0	0	0	0	0	0	0	0	0	0	0	0	0	0	0	0	0
Seita.1G033600	3.36557	4.97776	7.81706	1.83962	3.71846	1.71908	0.686574	1.69299	0.397436	3.50943	5.74989	3.61364	15.6719	11.8912	12.8881	0.276742	0.566272	0.253263	2.09913	2.71186	2.15562	34.6452	27.8642	9.09138	2.51881	3.68347	1.42657	9.44137	9.63192	5.0251	8.30028	8.7401	5.02511	0.227914	0.273249	0.51032	2.11159	2.85406	2.70498	4.01104	1.25433	1.82265	0.425047	0.481819	0.390245	2.73225	3.20798	2.02078	11.2969
Seita.1G033700	0.186691	0.085276	0.231263	0.388996	0.85032	0.494013	0.401834	0.113149	0.590566	0.333261	1.02864	0.306508	0.444836	0.237445	0.164753	0.3661	0.055068	0.232831	0.097046	0.075435	0.015966	0.958264	1.25532	0.55578	0.558096	0.663084	0.260712	1.29573	1.02404	0.783862	1.06957	1.65654	0.909898	0.161242	0.031306	0.041107	0.980838	0.45604	0.383658	0.906228	0.686754	0.68942	0.123527	0.075153	0.195173	0.461594	0.138731	0.119126	1.39582
Seita.1G033800	3.66513	4.41801	3.63967	7.95706	6.46155	7.48254	1.62896	2.13627	2.45637	3.13455	3.52943	3.91764	4.02801	4.27227	4.33563	0.769989	0.450617	0.417954	0.161274	0.125452	0.254787	0.88387	0.863435	0.680671	3.67561	4.67502	7.83342	24.8823	30.6901	43.1332	3.33478	5.55008	9.37692	1.53203	0.89911	0.903573	1.28811	1.7037	1.74992	2.36634	1.30588	1.38057	2.97605	1.98536	2.36835	1.27296	1.23068	0.770826	8.8659
Seita.1G033900	0.166227	0.134532	0.216788	0.263577	3.09762	0.187474	0.276558	0.152416	0.010136	0.049526	0.953877	0.002176	0.355067	0.220156	0.132409	0.19923	0.145257	0.207305	0.17506	0.150245	0.111736	0.302816	0.204124	0.256623	0.328104	0.053294	0.131119	0.191129	0.006928	0.098879	0.028246	0.886483	0.004786	0.009079	0.154535	0.048091	0.140443	0.15318	0.10617	0.241368	0.381277	0.149432	0.167492	0.105288	0.151072	0.22701	0.137667	0.110438	0.307002
Seita.1G034000	38.2418	44.6237	53.8094	60.2415	87.1045	76.4731	7.47513	22.1449	4.98549	71.6659	113.063	56.6296	167.033	122.923	42.5501	9.4825	9.67205	10.1047	30.5854	27.51	25.3941	83.3468	65.5496	80.5629	94.7961	50.2807	21.771	179.44	189.488	88.0607	93.9638	115.544	76.2489	13.5809	9.54445	11.7934	69.2193	81.5703	65.137	81.5649	32.4122	42.1861	8.18559	8.11788	7.3207	58.4601	63.5588	49.7313	33.7924
Seita.1G034100	0	0	0	0.024368	0.044206	0	0	0	0	0.628531	0.860154	0.41474	0.027487	0.026955	0.025008	0	0	0	0.351318	0.419986	0.342883	0	0	0	0.030984	0.109056	0	0.471846	0.575792	0.251323	0.0849	0	0.086324	0	0	0	0.166362	0.095711	0.320783	0	0	0	0	0	0	0.526734	0.727652	0.452921	0
Seita.1G034200	0.050821	0.026076	0.023372	0	0	0	5.82795	3.57456	7.23775	0	0	0	0	0	0	5.72848	6.23295	7.21871	0	0	0	0	0	0	6.109	9.77169	5.47642	0	0	0	0.944384	0	0.033829	6.2085	9.8473	6.35384	0.062348	0	0	0	0	0	6.54058	4.08307	3.61931	0	0	0	0.029363
Seita.1G034300	21.22	23.8441	26.5569	42.633	33.6765	41.9853	32.2011	29.1652	23.1757	32.0623	35.3626	23.5376	23.2087	19.5661	24.9571	39.176	38.4854	32.4601	37.8521	37.1884	31.8525	51.1039	47.2371	35.6827	36.3164	40.6449	28.3195	32.7457	34.2511	23.3776	56.0592	44.9058	32.5283	41.196	39.8399	40.8345	37.6348	40.6931	37.9654	44.8031	41.1051	38.9892	22.7391	23.3473	26.7684	27.5892	26.2547	25.7556	34.6644
Seita.1G034400	10.6334	10.0181	11.6072	7.0729	10.5829	7.07748	11.4493	5.67434	15.6839	13.4318	9.5097	23.9559	4.988	8.14933	11.248	9.94319	10.678	10.8984	15.343	17.7694	18.5802	5.16825	7.02071	8.25446	2.75338	5.2	10.9262	11.8508	9.11431	18.9793	12.2047	6.57812	12.3605	8.43909	7.00908	8.98383	15.1927	18.7263	17.8113	7.32821	7.54311	8.1169	12.8387	13.167	12.6015	19.7437	17.0957	20.5605	7.82065
Seita.1G034500	5.38504	4.65299	7.79467	7.54845	7.95095	8.12345	6.2416	4.88677	9.87288	5.11107	3.72142	6.59043	2.37123	2.34971	8.24046	14.3325	7.85134	7.02997	16.2028	8.10991	5.35638	13.5343	17.2816	3.7764	4.97016	5.73992	10.7902	9.53915	12.0898	12.5793	8.47618	6.30666	14.669	8.01403	9.81709	8.94957	11.8273	17.4614	10.9085	7.74645	12.0647	14	4.03902	3.38789	3.25853	1.9938	2.3421	2.09226	2.05772
Seita.1G034600	0.030501	0	0	0	0	0	0.637366	0.194658	0.848443	2.02516	0.65727	1.41841	0.02382	0.012299	0	0.16165	0.448768	0.517189	0.417898	0.629437	1.93866	0	0	0	0	0.061462	0.094465	0.170914	0.107904	0.191569	0	0	0	0.091848	0	0.10702	0.046854	0.106243	0.009965	0	0	0	3.04488	1.87415	1.3223	1.08474	0.888998	1.29388	0
Seita.1G034700	24.1554	27.3232	18.8318	39.8281	21.7371	31.8936	8.52722	7.03182	6.44208	11.4194	9.68762	13.7673	10.3363	14.1253	22.3145	6.16369	8.87345	7.37454	15.5555	15.5273	16.0065	14.4454	14.8846	14.7516	9.38411	10.8211	12.5505	9.91256	9.81287	11.2313	9.55722	10.625	15.2433	14.838	15.119	16.0702	13.526	16.8267	16.054	8.83495	17.6018	17.5957	9.38557	7.84334	9.31552	19.5876	19.7937	15.2942	54.3917
Seita.1G034900	0.067074	0.922663	0.50598	1.51321	2.04982	2.4739	0.072058	0.233241	0.241212	5.3602	3.18498	6.08193	0.247883	0.845705	1.23272	0.108435	0.068208	0.087314	2.06734	3.6122	3.25849	3.68553	2.20321	0.044875	4.5482	5.09131	7.75158	3.82327	5.66592	10.4883	43.5706	24.7162	23.6806	5.11745	2.89852	2.1886	2.3159	1.54877	2.63419	5.56454	1.04175	3.56544	0.478346	0.192704	0.042167	7.25377	7.31605	5.09128	4.22674
Seita.1G035000	31.8682	36.8282	42.6542	59.4773	49.2107	55.3398	17.0478	32.9085	36.0965	36.3814	32.9822	33.4644	31.176	10.9986	36.4848	38.4753	38.6799	39.3851	37.7667	36.6221	36.2586	16.0219	18.8439	35.4558	51.511	19.9022	49.7133	19.3124	41.5285	15.7733	17.5512	42.147	50.2644	25.5056	24.9689	49.4682	24.4243	42.145	25.2082	41.4806	39.8595	22.8421	35.5179	31.8094	38.4215	15.7575	17.6013	33.2803	42.5402
Seita.1G035100	7.64343	7.70767	15.5793	10.3572	15.3227	7.37884	2.27524	2.6022	2.26167	7.11545	9.00339	6.9129	11.4439	13.7998	9.22695	3.84564	4.12107	2.78636	7.17029	4.3179	6.30279	15.1505	14.8532	10.4275	5.25313	4.14213	3.46671	6.64924	10.5023	4.36243	13.4197	9.47877	5.76897	2.50816	1.76772	3.96778	7.20066	3.84099	6.04511	5.56791	11.4808	6.18617	2.73389	3.6899	3.35579	5.84121	5.36765	6.40416	16.2908
Seita.1G035200	0.373513	0.451973	34.5588	0.167781	0.703635	0.292396	22.4427	20.0155	25.2226	2.90573	2.21725	2.76791	1.42261	1.6096	9.92698	13.148	11.0685	17.7247	1.17125	1.75375	1.4232	10.3191	26.8522	0.557959	4.87302	4.05687	4.25454	2.77149	3.29929	2.95501	1.80841	2.38845	2.41474	2.94161	5.14829	3.38584	1.93062	2.10562	1.85345	1.40842	0.648955	0.564467	5.93179	5.6891	4.29026	2.7039	1.63622	1.77137	1.17085
Seita.1G035300	3.74364	4.56396	6.633	3.89806	5.09533	4.6935	4.60281	3.73215	2.59999	3.39296	4.2651	4.4476	4.85138	3.20406	7.50587	2.337	3.51572	2.43093	1.53131	1.14527	1.78525	8.32247	7.25873	2.63857	3.9042	5.20965	3.16363	2.93128	3.57328	2.20572	8.58751	4.5742	5.30115	1.59832	1.99666	1.86201	1.62745	1.63499	1.44493	4.54761	3.76425	4.17559	2.56168	3.03132	3.36733	3.39269	3.76289	3.88602	5.24682
Seita.1G035400	1.55756	1.82446	0.956865	1.39668	2.84284	1.82192	6.57902	2.89372	3.44703	90.7797	61.2389	112.832	4.50497	6.44497	1.84719	11.2264	11.6209	7.40538	81.0607	123.137	90.5122	3.52147	6.30681	10.8371	27.5967	17.9585	46.4003	5.57961	9.26798	44.706	0.186104	1.55676	9.08666	47.7544	28.4151	29.3711	19.1723	28.9885	23.2673	6.07606	8.04916	27.7671	6.54524	3.96413	2.32287	103.555	99.8101	96.9751	6.91486
Seita.1G035500	0	0.118443	0	0	0	0	0.433995	0	0.167973	1.32667	1.19436	1.41882	0.284689	0	0.064752	0.375191	0.229586	0.299999	1.48769	2.20614	1.78114	0.241745	0.224047	0.171688	0.481356	0.129255	0.268863	0.315557	0.040301	0.682113	0	0.171562	0.154077	1.30961	1.09465	0.865032	0.214421	0.459766	0.266643	0.143251	0.072862	0.064506	0.541025	0.276339	0.362808	1.53082	1.68	2.10446	0.433469
Seita.1G035600	0	0.160379	0	0	0	0	0	0	0	0.013469	0	0	0	0	0	0	0	0	0	0	0	0	0	0	0	0	0	0	0	0	0	0	0	0.02867	0	0	0	0	0	0	0	0	0	0	0	0.01629	0	0	0
Seita.1G035700	14.5711	11.6725	10.8413	7.86159	8.05114	8.96863	9.34016	4.51777	4.49735	35.4681	58.4675	28.6253	17.1137	4.92639	6.234	9.28766	8.03334	9.50255	19.3712	42.4701	10.5732	8.24774	8.37119	8.70879	4.8705	9.24442	4.41951	19.2811	23.7986	21.2115	9.70574	16.391	10.0248	17.9335	9.55373	12.9303	17.83	23.0956	26.5341	11.7203	16.4679	19.8233	5.47612	6.46459	5.49317	20.1868	18.1717	16.7967	5.67343
Seita.1G035800	0.360915	0.399138	0.278765	0.942458	0.679469	0.455769	1.75129	2.07311	1.2913	2.58389	2.02016	1.43233	0.207082	0.16543	0.2429	2.18059	2.74821	2.38282	2.66902	3.77812	2.36775	0.436427	0.456248	0.489552	0.831018	0.918607	0.977337	1.33052	2.15724	1.16517	0.054975	0.610968	0.286871	1.9536	0.868443	0.859221	2.03439	3.05347	2.8407	0.25129	0.630648	0.898319	0.939019	0.85908	0.739862	2.27328	0.004895	3.7221	0
Seita.1G035900	0.256098	0.368795	0.335324	0.628567	0.622032	0	2.53585	3.10552	1.7111	0.084265	0	0	1.12373	0	0	5.59468	5.66913	2.99734	0.023609	0.782573	0.783014	0.833393	0.568343	0	0	1.71995	1.81462	1.92845	0.000743	0	0	0	0.002044	3.15095	3.0722	2.20246	1.0009	0.013581	2.10335	0.671367	0.975357	0.963289	2.70404	2.89347	2.37522	5.11887	3.59603	9.60849	4.54264
Seita.1G036000	44.1761	46.4256	26.3774	37.1034	40.1066	33.1408	23.1198	18.7152	16.8247	29.8914	24.7242	35.6553	17.8247	21.4821	21.5375	29.5247	31.6588	35.7705	27.2818	34.9512	33.7125	27.3824	24.352	35.713	23.245	21.6122	36.5914	22.2542	23.412	24.5205	5.94606	11.5413	14.5875	38.4887	33.4549	34.6627	22.8822	24.7816	26.937	20.364	21.0078	35.9518	18.2577	15.8189	14.5544	22.1457	22.3901	23.1005	19.0977
Seita.1G036100	0	0	0	0.111179	0	0	0	0	0	0	0	0	0	0	0	0.02626	0.064349	0.031549	0	0	0	0	0.026883	0	0	0	0	0	0	0	0	0.034103	0	0	0	0	0	0.059669	0.055989	0.084467	0	0	0	0	0	0.093941	0.043046	0.084416	0
Seita.1G036200	0	0	0	0	0	0	0	0	0	0	0	0.032602	0.031611	0	0	0	0.017418	0	0	0	0	0.16599	0.141869	0.033834	0	0	0	0	0	0.050257	0.314239	0.115844	0.104037	0	0.030881	0.031454	0	0.031873	0	0.103518	0	0.072837	0	0	0	0	0	0.057631	0
Seita.1G036300	0	0	0	0	0	0	0	0.024565	0	0	0	0	0.025541	0	0	0	0	0	0	0	0	0	0	0	0.028118	0	0	0.056621	0	0	0	0	0	0	0	0	0	0	0	0	0	0	0.021914	0	0	0	0	0	0
Seita.1G036400	0.05864	0.09148	0	0	0.045091	0.112711	1.35917	0.918366	0.359654	22.6833	19.6921	17.3563	0.048343	2.74532	0.25567	0.339798	0.384188	0.389775	7.05183	8.08882	7.05124	0	0.013842	0.077646	4.79868	4.53627	6.5998	0.081499	2.50307	4.04929	1.82355	0.221842	0.045469	2.15521	0.751083	0.4844	0.047251	0.662242	0.316449	0	0.01133	0	0.835974	0.897553	0.670539	54.684	46.5072	54.5455	0.039237
Seita.1G036500	0.039663	0.040701	0	0	0.021214	0.062682	0.804859	0.708089	0.172422	9.77424	9.43389	7.70514	0.048914	1.2079	0.131033	0.212589	0.144786	0.252361	2.93125	3.43519	2.73552	0	0.021997	0.053072	2.43061	1.77934	3.07325	0.87719	1.40588	2.21831	0.784836	0.086336	0.038533	0.87942	0.305308	0.212496	0.137743	0.072994	0.160348	0	0.025038	0	0.578158	0.446774	0.38211	0	17.9815	22.3538	0.084026
Seita.1G036600	0	0	0	0	0	0	0	0	0	0.085888	0.093687	0.017533	0	0	0	0	0	0	0	0	0	0	0	0	0	0	0	0.030803	0.097389	0.020498	0	0	0	0	0	0	0	0	0	0	0	0	0	0	0	0.00991	0.016701	0.013694	0
Seita.1G036700	0.329774	0.42315	2.25301	0.326662	0.534156	0.523351	3.80827	7.06869	1.88493	11.9153	20.0709	10.3469	14.276	10.2415	10.4269	5.61365	5.81674	3.5128	10.2464	7.52166	7.44455	27.7063	22.0073	18.6786	14.6715	11.6941	3.76483	9.58669	15.2626	7.41157	2.01059	1.94615	6.44401	5.01527	3.43215	4.43014	12.0768	15.6104	14.2182	2.87567	3.04742	5.56865	3.74072	3.96101	2.95002	8.26432	8.71388	11.0532	1.67519
Seita.1G036800	0	0	0	0	0	0	0	0	0	0	0	0	0	0	0	0	0	0	0	0.015285	0	0	0	0	0	0	0	0	0	0	0	0	0	0	0	0	0	0	0	0	0	0	0	0	0	0.012087	0.02208	0	0
Seita.1G036900	0	0	0	0.018688	0	0	0	0	0	0.049122	0	0.059517	0	0	0	0	0	0	0.055075	0.025527	0.036958	0	0	0	0	0	0	0	0	0	0	0	0	0	0	0	0.025914	0	0	0	0	0	0	0	0	0.158282	0.25976	0.160596	0
Seita.1G037000	0	0	0	0	0	0	0	0	0	0.533594	0.366084	0.685601	0	0.475272	0.107092	0	0	0.091971	0	0	0.233482	0	0	0	0.56555	0	0	0	1.20106	0	0	0	0	0	0	0	0.681168	0	0	0	0	0	0	0.12142	0	0.615305	0.530007	0.180614	0
Seita.1G037200	2.85295	1.29266	2.33501	3.36616	3.55237	3.58919	3.30463	3.99224	2.53422	3.58516	2.25556	1.6051	4.9054	4.05382	2.80912	3.79838	4.45625	3.28844	2.0195	1.98875	1.87288	4.85749	3.95865	4.20144	5.14181	4.12885	3.7421	2.92804	3.88445	1.8247	2.2654	3.08005	3.00674	2.05629	3.69885	3.81826	1.60169	2.0635	1.29137	1.3371	2.66539	2.34857	2.71437	2.11622	2.37091	1.55634	1.86343	1.999	3.72803
Seita.1G037300	0.071021	0.0978	0.145551	0.232665	0.165808	0.169449	0.076854	0.106068	0.130534	0.363032	0.30536	0.270498	0.036358	0.015185	0.195527	0.131775	0.095931	0.085365	0.260493	0.151029	0.235506	0.066543	0.17779	0.079073	0.173979	0.352175	0.260345	0.475646	0.908836	0.599454	0.113829	0.106216	0.08183	0.118496	0.14877	0.154982	0.698357	0.696707	1.15649	0.041554	0.151806	0.084962	0.075661	0.15161	0.279277	0.190045	0.217416	0.187058	0.148934
Seita.1G037400	3.92185	3.53334	4.39996	4.84191	4.2156	4.37674	4.38704	3.69773	4.15452	4.68863	6.29307	3.67226	2.45947	2.95413	3.02621	6.90181	6.26765	6.3204	5.3743	4.96661	4.45983	3.98442	4.81097	4.14872	3.86143	5.55929	3.19826	2.77766	3.06672	1.85229	3.55371	2.08727	1.88077	5.30697	5.5781	3.9113	3.65983	3.68628	3.73983	3.16681	2.73247	3.49314	3.805	3.66812	4.34808	4.23763	3.73857	4.01823	3.11125
Seita.1G037500	0.181794	0.085815	0.216535	0.312734	0.145854	0.287946	0.097652	0.17682	0.437121	0.535522	0	0.287467	0.223079	0	0.622462	0.118189	0.243782	0.426761	0.120164	0.666479	0.36678	0	0.589823	0	0	0.140089	0.193447	0.370694	0.323307	0.208644	0.230826	0.13466	0.256431	0.201084	0.324153	0.221607	0.339231	0.002974	0.314982	0.115806	0.343901	0.10194	0.096179	0.08705	0.456772	0.263661	0.080185	0.282143	0.524132
Seita.1G037600	0	0	0	0	0	0	0	0	0	0.061214	0.071409	0	0	0.103904	0	0	0	0	0	0	0	0	0	0	0	0	0	0	0.02013	0	0	0.107633	0	0	0	0	0	0.02736	0	0	0	0.022569	0.056784	0	0	0	0	0	0
Seita.1G037700	30.8153	27.9137	30.6896	32.2331	26.4359	29.496	32.0678	27.1263	40.0565	28.9898	25.544	35.1331	24.5063	23.9062	39.2055	33.6589	30.6599	32.989	32.3028	32.4725	29.273	34.8626	36.8389	36.0433	23.3592	23.5726	34.8275	34.1832	28.5802	29.0173	12.3549	18.7722	28.542	30.8825	34.3641	30.1515	37.0308	39.8828	41.5146	20.5239	33.2667	27.9268	29.5169	31.1094	33.3544	28.1308	28.2862	31.6135	26.288
Seita.1G037800	7.09406	8.68494	9.7948	7.5164	7.04325	7.85172	6.1452	5.77651	5.70911	12.4135	16.8954	8.76117	8.91743	8.45312	8.4784	6.19673	6.93178	6.0352	8.17055	6.44131	8.80134	10.3109	10.684	7.89099	7.98174	9.13269	5.65102	18.612	15.1289	13.1844	23.3444	12.7634	8.45011	9.40372	9.14805	10.7587	11.7923	10.7211	10.9759	15.5948	9.43092	12.5237	4.45905	3.74749	4.32639	7.41126	6.44346	6.94803	8.14309
Seita.1G037900	0.705278	0.724895	1.97585	0.480283	0.776587	3.81948	0.000367	0.507602	1.26515	0.455575	0.112865	0.339316	0.276186	0.36984	0.950842	0.289193	1.213	3.33511	0.159911	0.632285	0.074623	7.14446	0.214055	0.773362	0.079191	0.155813	0.376737	1.94505	0.1603	0.302976	0.314757	0.146659	0.179819	2.61785	0.931962	0.92228	0.228028	0.112764	0.382791	0.913641	0.449634	0.255777	0.131196	0.413691	1.40183	0.357039	0.035022	0.110515	0.367399
Seita.1G038000	0	0	0.029791	0	0	0.068784	0.069825	0	0.031109	0.266691	0.356097	0.49199	0.120234	0.241986	0	0.042255	0.087157	0.084326	0.119718	0.35815	0.320824	0	0.072094	0.130453	0.180555	0.054048	0.194406	0.175918	0.248426	0.38194	0.020631	0.095965	0	0.071772	0.030647	0	0.040427	0.283754	0	0	0	0	0	0.031122	0	0.062983	0.1823	0.115502	0
Seita.1G038100	0.385905	0.848298	1.03209	1.29032	1.36811	1.55109	1.40689	1.15947	1.25169	2.38544	2.05708	1.83186	1.97829	0.927151	1.50483	2.07971	1.73597	1.72229	1.74175	1.78276	1.5989	1.9801	2.35636	1.73853	2.54486	1.56926	1.99207	2.99584	2.17941	1.91668	1.53348	0.575988	0.88768	2.98709	2.50139	1.84516	1.97562	1.37753	2.35863	0.507922	1.067	0.948382	0.439664	0.342087	0.301866	0.702355	1.28913	0.882257	0.586706
Seita.1G038200	35.5999	34.0666	35.807	61.2104	44.7183	57.8617	23.2613	20.2802	19.2826	29.2936	31.3851	27.9173	28.1173	25.9131	35.4354	20.4286	20.2216	20.0184	31.6757	29.2165	28.5102	39.4312	38.9059	30.837	32.055	29.9453	28.4778	35.2731	39.3132	31.7405	25.6867	33.8898	34.7905	34.143	32.2969	39.9123	53.3681	51.108	53.3364	42.5957	49.9008	52.1376	19.4173	16.6384	20.9863	30.6987	28.0577	26.4575	42.2203
Seita.1G038300	1.48799	0	10.2124	0	1.17398	0.807571	0.106447	0.995869	0.132	5.42292	23.8358	17.3169	0	0	1.69473	2.25484	0.619451	0.893774	8.98186	4.85881	6.16805	3.12129	5.04413	6.74741	3.03159	0.662961	0.473775	5.1686	2.57357	1.60049	0	0	0.240127	0.617442	0.613521	0.582698	3.04038	1.79134	3.4161	0.442941	0.152764	1.01743	0.042676	0	0.050711	2.62355	4.81393	3.60581	2.52264
Seita.1G038400	0	0.062552	0.093034	0.022681	0.592602	0.073044	2.76356	2.82642	0.783543	0.346114	0.495789	0.530051	0	0	0.022189	0.614123	1.058	0.933392	0	0	0	0.027893	0	0.027188	7.88002	6.74947	8.8307	0.444035	0.322415	0.136652	0.085292	0.060404	0.094752	0.391456	0.216947	0.474937	0	0	0	0.022425	0	0.022787	2.43099	2.38566	1.99769	0.861849	0.570485	0.747629	0
Seita.1G038500	0	0.014225	0	0.020738	0.021273	0.106118	0	0.001274	0.018506	0.025334	0.010819	0	0	0	0	0.044243	0.026254	0	0	0	0	0.082433	0.044178	0.001725	0.054292	0.015128	0.011685	0.073429	0	0.019545	0.008366	0	0.057365	0.027286	0	0.026245	0.026729	0.017926	0.024819	0	0.027127	0.044764	0	0.034618	0	0	0	0	0.024829
Seita.1G038600	0	0	0	0	0	0	0.09298	0.24906	0.058177	1.57291	1.19433	0.877712	0	0	0	0.27289	0.522669	0.232225	0.648175	0.821904	1.13285	0.04915	0.066513	0	0.038067	0.299188	0	0.368592	0.303873	0.135823	0	0	0	0.032888	0	0	0.130543	0.183927	0.14789	0.069662	0	0	0.126897	0.143565	0.037698	0.515704	0.380843	0.719203	0
Seita.1G038700	0	0	0	0	0	0	0	0.106708	0.058058	0.143149	0.059037	0	0	0	0	0	0	0.019805	0.060337	0.036666	0.070548	0	0	0	0	0	0.014512	0	0	0	0	0	0	0.0504	0.143956	0.022677	0.018421	0	0.017573	0.122661	0	0	0.032196	0.087322	0	0	0.027022	0	0
Seita.1G038800	0	0	0	0	0	0	0	0	0	4.11625	1.86048	0.948337	0	0	0	0	0	0	0.798835	0.82566	1.77499	0	0	0	0	0	0	0	0	0	0	0	0	0	0	0	0	0.15173	0	0	0	0	0	0	0	1.01102	1.43233	0.826708	0
Seita.1G038900	0	0	0	0	0	0	0	0	0	0.948687	1.1135	0.352633	0	0	0	0	0	0	1.38516	1.12657	2.4047	0	0	0	0	0	0	0	0.768279	0.727802	0	0	0	0	0	0	0.329631	0.576133	1.07406	0	0	0	0.234826	0.108069	0.564704	1.69641	0.787021	0.902418	0
Seita.1G039000	0	0	0	0	0	0	0	0	0	0.760496	0.660888	0.208866	0	0	0	0	0	0	0.305393	0.025751	0.206801	0	0	0	0	0	0	0.813599	2.63247	0.169873	0	0	0	0	0	0	1.81563	1.87441	1.21445	0	0	0	0	0	0	0.105346	0.035457	0.369327	0
Seita.1G039100	0	0	0	0	0	0	0	0	0	0.15314	0	0	0	0	0	0	0	0	0	0.46082	0	0	0	0	0	0	0	0.430656	0.718368	0.255035	0	0	0	0	0	0	0.953798	1.32312	1.06853	0	0	0	0	0	0	0.374522	0.995178	0.331162	0
Seita.1G039200	0.370558	0.411053	0.359353	1.5654	0.44952	1.37795	0.372719	0.326379	0.172008	0	0	0.040121	0.093411	0.071856	0.167461	0.203416	0.277923	0.276637	0	0	0	0.217837	0.364	0.045832	2.67582	2.38599	0.86161	0	0	0	0.119896	0.207568	0.226632	1.19624	0.343732	0.630012	0.027213	0	0	0	0.008386	0.015971	0.272949	0.804873	0.910993	0	0.10086	0.118352	0.074219
Seita.1G039400	0.032504	0.026845	0.072266	0	0.227689	0.041667	4.09361	3.99655	6.07661	4.48986	1.3255	5.94972	0.02639	0	0.137777	9.54012	12.7386	7.63321	5.51802	5.63382	6.81839	0.514049	0.99395	1.56701	7.36492	3.09994	4.72492	0.532304	0.912889	0.832645	0	0.066164	0.032508	7.99596	7.43797	8.74535	1.20117	1.56754	2.12323	0.138013	0.147746	0.142971	1.60496	1.22541	1.4372	12.3661	10.5187	6.85027	0.181266
Seita.1G039500	0.005003	0.027328	0.009473	0.027776	0.002766	0	0.002259	0.001557	0.002081	0.005057	0.007736	0.193052	0.290106	0.008486	0.000716	0.001027	0.00011	0.000458	0.006331	0.054269	0.001067	0.000442	0.041863	0.01534	0.007025	0.00061	0.001399	0.002599	0.004251	0.010067	0.004248	0.001628	0.003045	0.006392	0.000241	0.013236	0.089687	0.002996	0.02011	0.000466	0.017696	0.001127	0.001481	9.3e-05	0.000792	0.00231	0.011709	0.00205	0.000201
Seita.1G039600	1.54218	1.42502	2.05513	2.17876	2.51118	2.49678	2.65285	2.29457	2.40685	1.62146	2.63173	2.01599	0.702365	1.38299	1.58582	3.85153	3.20108	2.8742	2.55437	1.99087	2.27272	3.17251	2.99563	1.71897	3.57332	3.50451	3.91711	2.53265	2.63359	1.87455	1.97847	2.97116	2.56873	3.69446	4.36363	4.06311	2.37165	2.94444	2.39333	3.57453	3.47834	3.31284	2.0173	1.68473	2.18288	1.7089	1.07162	1.38736	2.22417
Seita.1G039700	0.055547	0.142898	0	0	0	0.036843	0.154699	0.06626	0.083008	0.814473	0.69747	0.898999	0	0	0.025295	0.218521	0.121946	0.058498	1.29661	0.944443	1.38285	0.094107	0.025259	0.014423	0.047274	0.072844	0	0.16976	0.156271	0.09308	0	0	0.015098	0	0.02707	0.040191	0.027102	0.025067	0.10434	0	0	0	0	0	0	3.45776	3.53515	1.91535	0.999504
Seita.1G039800	0	0	0	0	0	0	0	0	0.03799	0	0.045812	0	0	0	0	0.135039	0	0	0	0	0	0	0	0	0.054434	0.028003	0	0.095311	0.054507	0.01781	0	0	0	0	0.038554	0	0.077491	0	0	0	0	0	0	0	0	0	0	0	0
Seita.1G039900	1.70889	3.68673	3.36473	11.5989	7.37871	13.5154	5.68786	4.7456	3.08111	6.47321	7.8159	2.08467	3.33097	2.21294	4.10665	6.26706	5.53518	7.3249	5.52307	6.76802	8.60478	12.5408	9.69313	5.67448	14.5137	11.3284	5.58389	7.38974	8.69114	2.94197	14.0591	8.29371	6.3558	6.14772	6.29355	6.52462	5.37562	5.00608	6.14708	5.02348	5.8762	5.98437	3.81969	5.53542	6.171	5.23489	5.71738	4.29329	9.69325
Seita.1G040000	0.288554	0.370218	0.13093	0.055216	0.232281	0.101905	1.5531	1.14121	1.08946	4.00672	3.19276	2.60762	2.8093	3.60552	3.2837	0.865993	0.669514	0.997355	8.12444	10.6219	9.1193	0.338849	0.576765	0.705001	0.595675	1.02975	1.16289	0.723962	1.74722	3.66957	0.061131	0.218749	0.988909	3.84142	3.47033	2.74083	3.95209	4.26099	3.48655	1.11977	2.12812	2.16181	0.050943	0.178284	0.060536	5.4669	3.02924	3.92191	0
Seita.1G040100	0.384258	0.351041	0.547161	0.492712	0.220372	0.82253	2.31439	2.86521	0.641216	42.9259	27.413	20.4817	0.279223	1.49557	0.125781	4.65708	5.36547	3.84777	49.3082	76.1549	57.349	0.128532	1.05977	2.35449	5.45049	4.14068	5.55192	27.945	33.1454	55.98	0.269609	0.090925	1.26172	10.3415	6.87076	7.23391	58.3031	59.6006	57.0945	2.27258	3.80246	9.28683	1.66432	1.80766	0.171292	45.2166	52.1712	49.8209	0.296021
Seita.1G040200	37.6983	40.294	34.0279	54.2382	36.0617	48.0714	17.5938	14.2898	16.9646	24.1706	23.535	24.216	27.5932	25.7148	33.885	16.8539	17.995	15.5959	28.4881	26.847	22.2682	31.7566	30.8178	28.8921	20.637	19.1864	20.4249	34.8741	31.0909	24.8797	33.1333	30.8303	25.8184	24.7238	22.3115	23.5091	30.7925	30.7249	31.8193	29.4409	28.4548	27.1527	29.4147	31.0904	42.6918	24.9041	23.8871	25.2093	55.6265
Seita.1G040300	24.4472	26.2955	25.5556	31.5883	23.7748	27.605	10.071	7.58902	10.9905	16.2406	17.4273	17.2139	24.5984	20.3202	32.6185	8.53101	9.62279	8.97946	17.0551	16.7219	15.9141	24.1959	24.2968	22.1769	11.7971	12.6847	12.8791	20.8695	19.9154	17.2889	40.5063	29.1466	24.9734	13.8723	12.9505	13.2513	21.1147	21.8342	21.8822	28.5819	24.6189	27.9791	9.05857	7.88508	9.60204	17.2897	15.4629	14.901	28.5927
Seita.1G040400	0.056186	0	0.1055	0	0	0	0	0	0	0.106853	0.156991	0.19058	0	0	0.029778	0.031647	0	0	0.081465	0.099949	0.173461	0	0	0.103591	0	0.101413	0.162074	0.114678	0.108308	0.122595	0	0	0	0	0	0.02694	0	0.047652	0.022431	0	0	0.043122	0	0	0	0.037511	0.169467	0.169903	0
Seita.1G040500	18.0874	16.9985	20.3924	16.4068	19.6623	15.4876	14.6322	12.9145	16.9466	21.4229	21.4275	19.3493	16.8618	14.7814	20.7978	18.1605	20.3146	16.8743	16.7775	14.607	15.6027	20.365	22.4875	15.0208	13.4978	14.9306	16.5881	17.8053	18.7414	12.1563	30.589	20.1904	18.4456	13.0831	12.0913	13.8781	17.1061	16.6018	15.9497	20.0555	13.7932	16.3701	12.4631	10.0873	12.894	16.7324	13.5996	14.7565	12.8046
Seita.1G040600	10.0033	10.0882	11.7518	13.6983	12.8253	13.4001	13.1992	12.6456	15.203	13.2802	13.3932	10.7637	12.8325	11.2775	13.1066	13.9302	14.0165	13.174	10.8369	10.1296	9.84984	11.4686	13.6331	11.4717	17.5398	16.7367	16.9938	15.1191	14.7052	9.61964	16.722	13.1725	12.5095	14.8319	14.4757	16.6166	12.5008	13.0445	14.4234	13.9787	12.5214	12.6006	11.4352	10.6801	13.4449	11.7368	9.65946	9.35659	8.83624
Seita.1G040700	0.312185	0.228844	0.386621	0.208386	0.173035	0.185563	0.72024	0.271807	0.64929	0.992396	1.22637	1.41896	0.303617	0.158764	0.643441	0.292908	0.266364	0.363715	0.513634	0.921595	0.757229	0.378104	0.71182	0.099995	1.04126	0.700173	1.65589	0.562076	0.757124	1.11357	0.39269	0.981447	0.685642	0.3651	0.543256	0.452913	0.517013	0.741707	0.261577	0.602959	0.466986	0.158912	0.243722	0.513261	0.203244	1.17998	2.11968	0.962868	0.931215
Seita.1G040800	7.32901	5.5302	7.86635	7.21754	9.16269	7.18675	3.165	2.66436	3.57109	9.72466	7.65672	11.8312	4.59914	5.99188	6.81668	3.77543	3.56221	3.48019	10.3999	9.46889	8.442	4.11258	4.44651	4.53321	2.97281	3.60072	5.80994	7.18086	7.4887	5.78106	8.23095	4.39441	5.69107	7.85769	7.77475	7.14706	6.62527	6.83628	6.97907	4.91805	3.56768	5.27805	3.50027	3.11946	3.32557	8.62439	8.45294	9.05516	7.35877
Seita.1G040900	288.758	248.168	313.843	415.294	425.37	397.079	438.185	279.147	193.006	11.1084	12.1069	7.16489	408.522	414.503	261.019	255.99	309.245	253.872	9.99477	5.59319	9.96913	155.919	194.52	372.213	556.146	706.257	565.089	33.5785	28.0388	9.76644	95.8653	328.014	394.198	299.673	292.783	320.733	18.328	25.3686	8.61683	445.324	427.904	410.484	267.834	324.409	238.591	5.92602	7.3161	10.1203	66.523
Seita.1G041000	0	0	0.018979	4.4e-05	0.081028	0	1.82565	1.01528	0.764431	8.04193	4.83635	8.20678	0	0	0.095272	1.28247	1.44504	1.29637	2.43785	3.74231	3.98834	0.085379	0.250923	0.228857	0.76663	3.83477	5.45929	2.55546	3.6633	1.25045	0	0	0.141454	1.99839	1.79715	1.67339	0.815808	1.00325	1.38901	0	0.765415	0.424367	0.738986	0.402155	0.591128	3.89356	3.68146	2.18017	0.129398
Seita.1G041100	0	0	0	0	0	0	0	0	0	0	0	0	0	0	0	0	0	0	0.07017	0	0	0	0.16191	0	0	0	0	0	0	0	0	0	0	0.101961	0	0.050979	0	0.065124	0	0	0	0	0	0	0	0	0	0.055698	0
Seita.1G041200	14.145	15.9063	20.2563	18.6394	20.5652	19.9075	29.022	31.0595	20.4708	21.7208	30.6646	12.2466	24.8839	17.2619	15.2931	34.8185	34.6356	25.1742	23.8219	15.347	14.2651	28.9959	32.2494	24.8677	54.604	38.7013	20.751	24.362	27.9704	10.8613	56.2296	29.3051	13.3676	25.5638	28.6661	27.9598	19.4917	19.0019	19.6902	25.2131	20.8123	20.0214	13.0653	14.2097	16.2677	7.88905	7.11871	8.69674	9.96516
Seita.1G041300	31.7114	34.374	37.4477	47.2187	50.9715	59.2484	82.4783	73.9948	96.8296	12.0264	12.8314	9.22575	21.3305	16.6274	40.9875	82.3052	86.2954	77.3313	11.5539	10.893	11.6115	47.8552	51.0974	22.1733	80.5457	88.288	95.0033	26.6772	25.9267	19.6614	123.243	61.2599	86.0001	84.6792	90.46	97.9444	23.638	22.1512	21.6371	45.8959	42.6247	59.6082	82.3092	72.6764	89.6956	8.75531	6.59681	8.98602	34.7072
Seita.1G041400	0.024999	0	0.011593	0	0	0	0.11974	0.145741	0.290042	2.11996	1.3133	1.48774	0.117935	0.079278	0.014142	0.283806	0.143671	0.221455	1.29133	1.51708	1.64924	0.050962	0.013771	0.050598	0.104436	0.06275	0.136456	0.398592	0.350563	0.459097	0.032009	0.018736	0.033035	0.041061	0.127358	0.046561	1.00181	1.326	0.917762	0	0.205925	0.056544	0.112564	0.156958	0.281568	2.00115	1.67358	1.69217	0
Seita.1G041500	6.52108	4.82556	5.9011	6.03359	6.06711	7.7541	5.36023	2.83445	6.56333	8.94824	5.9542	16.5721	5.87094	7.50402	5.94342	8.62494	8.23605	8.46886	9.62411	12.9294	9.61832	2.72926	2.57419	7.35734	2.91168	3.20131	7.78938	8.23686	9.60848	28.8912	0.368225	2.27311	2.16743	7.43405	5.84057	5.84924	13.6547	12.5593	14.3366	1.94416	7.55928	3.78697	5.94416	6.18157	3.95372	13.393	13.4348	11.6468	2.51746
Seita.1G041600	0.480159	0.994434	0.708901	0.819747	0.633858	1.28033	9.90854	7.9154	1.24946	2.28629	1.53689	2.71889	0.203411	0.387041	0.422746	9.92062	15.1897	12.9168	4.12712	5.28037	3.54853	0.07958	0.395422	0.973696	6.87745	5.4775	11.0747	2.39186	2.07848	6.80501	0.355698	0.651706	1.17235	6.79972	6.33079	7.11483	3.45659	3.25787	3.40244	0.56546	0.384413	0.175924	4.58629	6.4569	5.83284	4.63915	3.19029	4.08498	0.232546
Seita.1G041700	1.67598	1.5852	3.3478	2.51598	0.793904	3.40998	4.25807	5.98379	6.97445	7.80586	4.73814	11.0548	0.047073	0.024677	0.267033	2.3176	3.01454	2.26294	6.9817	6.86618	6.8155	0.243761	0.20066	0.178111	1.36936	1.1735	3.17326	0.026486	0.199621	0.521354	0.719918	0.027456	0.573677	2.13609	3.08568	1.26364	0.396099	0.615699	0.278189	0	0.360576	0.053527	10.8786	12.2917	9.73742	20.1579	17.1324	13.0423	0.435401
Seita.1G041800	0	0	0	0	0	0	3.29813	3.04875	3.44676	0.036762	0	0.039388	0.112019	0.039708	0.226799	14.9644	12.7768	13.1302	0	0	0	0.088387	0.139139	0	3.71728	5.57425	6.79566	0.084245	0.042384	0	0.098308	0.023171	0.083101	9.06441	10.3196	8.99573	0.232585	0.038635	0.017526	0.07232	0	0.034966	0.096769	0.20423	0.030838	0.014804	0.100139	0.011358	0
Seita.1G041900	0.029032	0.007473	0	0.008352	0	0	34.3348	24.295	43.5473	0.066516	0.012784	0.045695	0.084301	0.054535	0.683508	28.3759	33.4242	30.5914	0.034657	0.080316	0	0.374547	0.116748	0	5.02064	9.87903	17.1181	0	0	0.122606	0	0	0.163704	6.0446	8.12241	6.02075	0.113482	0	0	0.041905	0.036776	0	45.4108	45.2567	37.5436	0	0.077433	0	0
Seita.1G042000	0.859979	1.16301	0.957148	1.84665	3.37483	2.26971	9.91173	9.43314	11.0683	0.15054	0.254444	0.241356	0.625618	0.846589	1.06328	9.07822	10.8031	8.95475	0	0.060864	0	0.19625	0.224151	0.377824	3.70763	3.64058	6.1854	1.39222	1.05059	1.55785	0.043085	0.169066	0.314677	5.26212	5.50713	4.52887	0.618012	0.813468	0.529467	0.162915	0.339502	0.271917	11.2053	9.47693	4.5351	0.027555	0.214394	0.063165	0.373712
Seita.1G042100	0	0	0	0.114734	0.080736	0.159639	0.081082	0.124449	0.170937	0	0	0	0	0	0	1.00973	1.06082	1.22662	0.016851	0	0	0.039329	0	0	0.080627	0.095572	0.410676	0	0	0	0	0	0.030561	0.890926	0.522941	1.15475	0	0	0	0	0	0	0	0.002891	0	0	0	0	0
Seita.1G042200	0.167989	0.321318	0	0	0.083287	0	0	0	0	0	0	0	0.064012	0.066105	0.038825	0	0.023201	0	0	0	0	0.045602	0.067169	0	0	0	0	0	0	0	0	0	0	0	0.0617	0	0	0	0	0	0	0	0	0	0	0	0.047222	0.015373	0.462635
Seita.1G042300	0	0	0.028676	0.394197	0.156558	0.665401	0.315572	0.37985	0.083696	0.148954	0.354227	0.048426	0.154136	0.291478	0.066617	0	0.398714	0.237	0.019869	0.084657	0.091476	0.010658	0.119022	0.025861	0.996192	0.404986	0.449103	0.32301	0.39569	0.157773	1.2362	1.28375	1.3176	0.296104	0.190524	0.507537	0.164867	0.107326	0.250988	1.11095	0.504206	1.32722	0.06268	0.072001	0.038356	0.171847	0.241949	0.168649	0
Seita.1G042400	7.75784	6.87552	7.67923	8.869	8.52352	10.6435	7.88931	5.59543	9.85749	28.8767	18.6	42.7023	4.03486	5.62646	6.90449	12.8105	10.054	12.7508	43.394	54.9448	52.978	3.25262	3.72634	8.26147	8.35069	10.2875	14.8359	17.2483	19.5451	64.5299	1.50099	4.36645	7.71261	12.5555	13.0776	11.0936	28.9767	27.0633	30.0187	3.38528	6.70296	7.79381	6.11923	5.93583	4.63664	70.6439	69.8326	61.7281	2.96284
Seita.1G042500	17.3908	17.3295	17.7755	26.7787	18.1668	23.2793	18.5562	17.4982	15.0846	11.5281	9.72525	12.8986	18.4372	14.1268	17.4094	16.4975	17.9587	18.3958	11.6848	15.374	13.0416	20.5696	18.6183	17.6803	24.3416	23.3501	16.961	14.1036	13.3813	12.0712	30.4678	22.3432	17.6582	17.9791	19.185	22.2152	18.3533	18.7413	16.1964	22.771	21.3846	19.452	18.5263	17.9339	19.9301	15.3089	16.0246	13.3047	19.2953
Seita.1G042600	57.0476	63.9773	57.3785	83.8825	63.7102	79	62.3497	56.5252	58.2107	60.9831	55.3469	65.5359	79.6406	70.4282	78.621	63.8962	65.5801	62.9863	73.3956	74.3779	66.4759	84.4043	85.0546	87.5802	87.0823	88.6631	76.8774	75.0326	66.7632	66.8309	83.7784	86.9332	82.3122	97.1372	106.149	110.192	101.58	99.7531	104.881	89.6744	96.8653	90.5114	48.9797	46.3735	48.1205	55.2804	57.5002	53.0027	73.6165
Seita.1G042700	0.025899	0.080267	0	0	0	0	0	0	0	0.092022	0.125361	0.032721	0.032155	0.033206	0.256753	0	0	0	0	0.031951	0.165962	0	0	0	0	0	0	0	0	0.023718	0	0	0	0	0	0	0	0.319787	0	0	0	0	0	0.024969	0	0.012549	0.173505	0	33.6646
Seita.1G042800	0.233986	0.76742	1.6878	0.175168	0.104195	0.362506	0.982512	0.273201	1.18596	18.0777	12.98	31.2031	3.76244	3.11638	0.855975	0.745979	0.964541	0.960682	14.7364	15.8525	16.3087	2.21209	1.51543	0.39066	0.417908	0.164634	1.07638	3.05165	4.59725	7.25263	0.05849	0.176885	0.213108	0.834937	0.781922	1.13886	9.79685	8.6593	11.5415	0.133789	0.018546	0.292636	0.538563	0.969349	0.780113	20.0515	19.0615	16.5702	1.48488
Seita.1G043000	0	0	0	0	0	0	0	0	0	0	0	0	0	0	0	0	0	0	0	0	0	0	0.107933	0	0	0	0	0	0	0	0	0	0	0	0	0	0	0	0	0	0	0	0	0	0	0	0	0	0
Seita.1G043200	1.46707	1.72044	1.39172	2.04336	2.44974	2.26247	4.39842	2.89933	3.47859	0.171527	0.047754	0.087176	0.433014	0.919188	0.896495	3.5322	5.40615	5.70544	0.11678	0.225064	0.122366	0.640096	0.658017	1.7262	2.69835	4.3589	4.23271	0.11145	0.048368	0.112706	0.284403	0.429404	0.684373	7.69348	10.616	9.05527	0.093729	0.253961	0.041751	0.699435	1.48462	1.63824	4.17834	4.77257	2.89171	0.29194	0.590523	0.240376	0.793657
Seita.1G043300	18.01	18.1541	26.3042	37.4658	36.5736	32.7	20.3423	19.4268	23.0081	20.8766	15.1087	14.5301	22.2097	18.3479	17.8069	23.1027	24.2571	20.3182	16.0348	14.9376	15.0875	35.066	34.2212	28.0932	39.9024	38.5478	38.0122	40.9144	36.4099	17.7529	36.5263	47.5887	38.7718	27.5106	27.8329	43.0653	22.6524	25.7686	34.4575	53.0355	21.6374	32.5044	29.5544	26.7196	30.7227	18.7922	18.8144	17.0905	23.4422
Seita.1G043400	5.6098	6.01258	6.54699	4.61595	5.89088	5.56678	6.85534	6.49395	8.16826	8.83583	11.2792	13.5659	12.5481	11.5416	7.56567	6.36713	5.58829	5.22187	4.75107	4.98105	6.20983	12.4121	12.6924	10.1402	9.32684	5.96971	8.95269	9.83872	11.6973	18.2482	8.45025	8.96341	7.61445	4.89902	5.24206	4.27345	5.35374	8.24896	7.91523	7.16882	6.76402	5.56557	4.67881	5.64842	2.84205	4.96372	5.62618	5.55713	7.08367
Seita.1G043500	6.24134	22.0685	21.5432	16.5449	15.0261	21.8722	64.0023	60.7895	48.7442	64.3798	64.5888	54.3407	26.731	24.0981	15.8213	120.245	94.3291	81.1994	68.1053	61.4677	61.0309	105.756	157.799	21.3025	152.123	139.722	94.1407	48.8566	36.9864	48.3444	269.451	87.8672	36.6973	132.363	101.799	125.617	92.0351	67.2628	87.1668	51.2741	11.8499	22.1354	40.5561	41.1517	48.1939	55.0092	51.7629	63.3305	30.774
Seita.1G043600	10.3136	8.11222	10.7924	8.61503	9.14256	8.5532	12.5576	9.1624	13.332	14.8669	15.046	12.4196	12.3786	11.4106	13.9413	9.54736	11.043	9.97654	12.69	11.5476	13.0873	9.8656	11.2148	10.9965	7.88372	8.3676	10.7676	10.1266	10.7772	8.34718	4.71215	7.78575	8.79597	9.34083	8.05671	9.55678	10.8432	8.62177	12.6768	7.38577	10.3139	9.3462	9.03385	8.34069	9.21984	12.6098	11.1861	7.30233	5.87824
Seita.1G043700	18.0441	18.7548	28.9808	2.89492	4.18103	2.52168	0.09117	6.3301	0.098125	1.84954	33.9812	5.63471	97.3506	49.031	4.6335	0.483007	0.059295	0.034085	11.0203	9.5497	8.14082	53.3069	41.3521	36.2933	4.11834	0.14971	0.803466	14.6901	8.37279	7.68935	5.57068	14.053	1.95628	0.056271	0.090475	0.041298	14.5785	15.0359	12.9073	6.50478	0.113894	3.40099	0.897304	1.19725	1.86492	11.2244	16.2257	13.9297	18.7165
Seita.1G043800	5.76152	5.81259	5.68041	1.76068	3.10452	1.10215	6.23928	5.71029	6.00493	0.061126	0	0.183182	7.49742	4.23723	2.24667	1.49106	2.26045	2.43173	0	0	0.060401	0.869786	1.95143	3.11573	3.54286	4.9669	2.88938	0	0.024135	0.031544	0.222048	0.102744	0.069204	11.6522	16.9246	13.5374	0.107487	0.096536	0.019961	0.250677	0.712415	0.593162	4.32569	6.86572	2.60775	0.050237	0.030079	0.061112	2.84954
Seita.1G043900	7.31677	5.53711	6.28395	3.81493	3.53253	2.9138	2.4015	0.867198	1.88692	11.3031	7.81437	11.0254	4.42601	8.56013	3.20066	2.91197	2.19911	2.74479	8.16964	9.38298	8.75032	1.22824	1.9005	4.45715	0	0.120182	0.635105	5.34861	8.85222	15.1973	0.027458	0.528742	0.459976	0.957357	0.982078	1.17309	8.30092	6.99796	9.16663	0.339291	5.03158	1.48761	1.84564	1.80084	0.846634	12.4129	10.3207	9.7314	1.47782
Seita.1G044000	4.81876	4.30858	4.53707	5.34958	6.12349	6.30478	8.64373	8.08955	6.5541	6.17563	6.28259	4.80989	4.70242	4.84614	4.982	9.72926	11.2246	8.81333	6.52572	6.29941	5.11329	11.8087	11.2141	6.6494	9.14883	9.74079	8.29969	6.00038	6.84538	4.13604	10.5963	7.58796	5.20902	11.3098	15.561	14.6285	7.50929	6.89147	5.5446	7.38419	7.61934	6.65052	7.12406	7.38192	7.29089	4.88982	5.82484	5.37244	5.01653
Seita.1G044100	17.9445	23.4594	22.3136	49.4214	33.913	47.8492	17.8858	15.8819	11.9977	20.4608	20.8684	16.9701	17.7682	12.4554	12.9651	25.4895	23.8519	23.3185	23.4453	23.5086	23.7431	34.5605	32.7241	21.1272	35.1166	35.9524	23.446	18.8098	18.3847	10.0849	15.5428	13.6745	14.0411	27.8598	29.7849	28.7466	13.6052	16.6414	15.4766	13.2457	23.4817	17.2962	21.8744	21.6006	18.4561	20.828	20.7943	19.3738	43.4819
Seita.1G044200	0	0	0	0	0.055884	0	0	0	0	0.137977	0.107393	0.096542	0	0	0	0	0	0	0	0	0	0	0	0	0.036311	0.173479	0.093128	0	0	0.023761	0.132552	0	0	0.028652	0	0.016081	0	0	0	0	0	0	0	0	0	0.050623	0.011598	0	0
Seita.1G044300	10.0542	10.3455	14.9413	16.9128	14.8202	14.6632	7.50251	6.16331	9.24273	6.8119	7.31743	6.73962	7.1849	4.37097	10.792	6.42763	7.94289	6.12462	9.55855	9.22281	6.78362	9.37759	10.0331	6.44444	7.38033	10.3131	9.81547	8.84408	9.42109	8.70826	14.1481	7.07462	10.9356	11.2075	10.8372	10.7265	7.2508	7.44218	10.198	7.42665	7.71738	8.70195	4.53823	3.7307	4.63425	4.39078	4.3351	4.28701	5.42744
Seita.1G044400	1.16219	0.986922	0.585615	1.84736	1.38301	0.693694	0.945442	0.341094	0.625102	0.25651	0.360201	0.53572	0.652301	0.30853	0.273988	1.38669	1.4389	0.506813	0.858165	0.427541	0.981463	1.85399	0.811157	0.506249	0.754494	0.610548	1.23462	0.38825	1.0333	0.431649	1.35486	1.4951	1.07426	0.342479	0.23265	2.28334	0.732071	0.520631	0.768382	1.13442	1.53728	0.369962	0.80539	0.870513	1.19081	0.390714	0.650796	0.514832	0.403558
Seita.1G044500	5.26868	4.41098	4.52086	7.89225	6.98123	10.0364	6.1553	4.15954	5.90041	7.57745	8.06659	5.42246	3.58207	1.99927	1.35288	26.6979	26.5352	26.5168	21.0764	13.2001	19.1597	3.18231	3.47447	9.36125	21.9564	12.9985	15.5353	3.38334	3.36521	2.38123	6.06477	3.36597	1.98032	17.9579	20.1383	19.7391	12.8058	12.8381	14.8886	7.78747	6.89491	6.37118	22.6695	39.1134	29.4235	48.0175	43.6244	43.7169	3.44049
Seita.1G044600	2.82378	2.54307	3.44137	2.97154	3.62573	3.1857	2.93035	2.52431	4.4035	3.46266	2.78668	4.14702	1.90538	1.35113	3.82183	2.3885	2.47116	2.49394	3.60786	4.5076	3.78208	2.25915	3.06462	1.58238	0.831357	1.73593	2.9606	3.31558	2.56111	3.15935	2.84046	3.14339	4.8525	2.451	2.65354	2.65265	4.55865	4.7855	4.83959	3.30212	3.45226	3.60093	3.68887	2.49419	3.37444	4.54298	4.09949	3.90693	2.59771
Seita.1G044700	3.65277	5.31071	2.15398	0.75255	3.59746	0.585548	0	0	0	0	0	0	7.162	8.60653	3.70814	0	0	0	0	0	0	0	0.72775	1.2655	0	0	0	0	0	0	3.87888	4.61075	0	0	0	0	0	0	0	1.90676	2.43973	2.68207	0	0	0	0	0	0	4.33608
Seita.1G044800	1.29969	2.08964	1.98341	8.80296	7.4244	9.35051	0.29092	0.406989	0.683394	4.06668	4.3527	5.11876	1.96212	1.99184	3.05563	0.120533	0.209136	0.162385	3.05341	2.50616	3.99168	3.69547	2.73976	1.82359	1.53204	2.07431	1.68725	7.39145	8.68615	3.59252	5.37224	7.98812	3.57943	1.45382	0.794142	1.10169	5.53087	4.73553	5.14045	6.52892	5.64492	8.00599	0.155029	0.197093	0.338219	3.88791	4.03061	3.66104	4.69389
Seita.1G044900	0.050641	0.054149	0	1.1716	0.586342	1.34269	0	0	0	0	0	0	0	0	0	0.131875	0.029732	0.091485	0.182406	0.240415	0.252635	0.200528	0.142877	0.225013	0	0	0	0	0.025531	0	0	0	0	0.360358	0.303191	0.65327	0.584318	0.694655	0.476182	2.08096	1.23655	1.5149	0	0	0	0	0	0	0
Seita.1G045000	3.20708	3.36443	5.10633	14.7404	15.5429	22.9054	3.30946	2.82193	2.32972	60.6545	62.0447	49.1626	9.92313	21.2079	5.40337	4.44822	4.0106	3.01839	59.9108	65.2484	59.9004	7.33102	8.98983	9.69745	15.8194	9.172	14.036	32.2771	43.3783	38.4919	13.4793	42.3685	20.9442	9.47245	6.70384	6.71926	21.5832	20.8611	21.4554	67.2512	18.4037	29.8593	1.70333	1.65301	0.77865	59.1609	58.783	61.8724	5.6909
Seita.1G045100	49.9759	48.7762	47.7179	61.7229	57.3977	67.9636	27.4721	29.2237	22.6848	26.4645	25.867	23.38	54.2662	36.1356	28.0728	43.4142	42.5497	46.5068	22.654	16.522	18.925	23.6535	30.7294	44.4661	36.0354	33.7585	23.5373	40.5839	36.4855	22.4482	60.5766	37.0489	33.746	31.567	27.9834	28.9993	29.2111	25.031	21.6826	48.7562	37.5043	38.1483	35.3168	40.1141	44.4499	25.1185	23.7394	25.262	27.193
Seita.1G045200	0.284868	0	0.558233	6.996	4.7495	13.3864	0	0.361053	0	0.571306	0.774245	2.31355	1.71302	0.571257	0.788657	0.195696	0.03469	0.278007	0	0	0.58029	1.1245	0.706007	1.85809	3.67676	2.13968	1.03656	24.9002	29.179	45.3249	13.015	35.7218	24.259	0.182599	0.230974	0.346722	15.2508	14.7557	13.4134	61.0723	10.1618	17.047	0	0.079376	0.032526	0.175476	0.224928	0.091943	0.574345
Seita.1G045300	2.18871	2.27495	3.73631	3.10334	2.68599	3.76779	3.14724	4.33193	3.79208	1.61765	3.21165	1.85956	3.53543	2.76119	1.87381	4.89504	3.50011	3.8965	2.29274	1.64508	1.7454	4.64336	3.64105	3.01792	1.79618	2.28849	2.62758	2.67617	2.67642	1.91315	1.46406	2.33935	2.44373	2.9557	2.82904	2.73099	2.41465	3.06919	2.51466	2.80617	2.66563	2.06583	1.09874	3.45478	3.67328	1.60975	1.1469	1.34088	2.02794
Seita.1G045400	52.072	58.1197	99.7405	22.2776	29.1488	24.4549	12.7223	13.4007	6.02779	0.425328	0.771286	0.469173	225.954	94.8741	63.0152	15.1106	18.4441	21.4837	0.069089	0.553627	0.180371	157.541	165.445	143.898	0.168391	0.217685	0.949162	0.42214	0.411355	0.031588	3.34532	31.3341	18.8782	0.920561	1.10914	1.411	0.3427	0.989319	0.120735	24.2464	22.3212	11.4543	6.13179	10.3017	14.46	0.236113	0.332931	0.153553	74.5546
Seita.1G045500	43.3187	40.9333	54.8707	62.1998	48.3419	57.4899	26.5996	21.0915	33.0131	32.6083	42.1613	28.8407	20.6074	19.9244	41.7102	26.9611	25.4667	29.735	22.2699	20.8556	21.448	28.1414	40.4327	34.2786	13.9874	18.613	34.2743	48.7268	50.7137	36.8585	16.7825	30.5159	60.3567	25.195	23.3878	24.2312	36.6317	34.5859	36.2605	46.321	49.869	60.5165	22.4412	20.6848	21.713	25.7674	24.2894	26.9072	38.4451
Seita.1G045600	0	0	0	0	0.101866	0.050388	1.43265	0.719589	2.70912	0	0.197516	0	0	0.045479	0.106131	2.55131	1.97059	2.59493	0.027695	0.058347	0	0.063753	0.038659	0.045821	0.099283	0.048713	0.344563	0.117064	0	0.082278	0.225614	0.132857	0.063559	0.353047	0.583827	0.265925	0	0	0	0.150262	0.160253	0	0	0	0	0	0	0	0
Seita.1G045700	42.6953	40.4875	44.8075	48.3172	39.568	41.6581	1.85084	1.6481	1.82398	1.68658	3.34752	2.76851	13.6536	12.4199	28.4203	3.40159	3.54072	4.16167	3.48837	3.1511	3.89734	26.0238	26.6415	16.2516	1.7822	2.02894	1.87094	3.26402	2.24402	2.47831	7.67939	8.26144	12.934	1.23306	2.16255	2.38114	2.25935	1.85308	1.82533	12.667	28.3932	23.1367	3.46077	3.4667	4.20182	2.67906	3.72774	2.75621	32.8831
Seita.1G045800	0.947034	3.73459	5.4088	3.30014	2.82144	3.48919	11.2722	9.1326	11.203	1.40524	1.17493	1.3546	1.80674	2.4025	3.96614	24.1421	20.0425	24.2979	0.855924	0.6386	0.524555	7.37477	9.12077	3.00324	8.58148	8.76847	12.2557	1.0318	1.0843	0.827653	0.706989	1.3893	2.21385	6.96878	5.77297	7.70675	1.28133	1.05171	0.586444	3.94935	2.50316	5.10851	4.98604	7.95711	8.21261	0.93624	0.982414	0.639185	2.41264
Seita.1G045900	19.0898	18.6246	20.9953	27.6109	19.6171	25.1323	6.19696	8.37086	4.79461	16.261	18.8482	13.107	22.7572	22.918	20.614	7.43519	8.41417	5.54595	17.3079	16.4958	16.4608	36.6606	27.4492	17.8149	18.4326	14.7878	9.82494	17.1081	18.1537	9.59831	41.107	35.0239	21.3939	8.10418	8.98762	8.77603	14.7147	17.3943	14.9685	35.3519	29.2589	26.5137	4.66906	5.23311	5.14353	17.2043	16.6492	15.4303	34.2983
Seita.1G046000	49.4835	55.0577	55.5552	73.5417	51.3719	67.0987	51.5298	45.2758	45.0269	50.2979	49.021	47.0716	46.4939	42.9947	53.6093	54.5414	57.6753	56.0631	65.9602	61.5321	58.8633	68.4664	66.4329	54.2686	56.0889	60.6265	53.5312	50.2069	50.5639	37.5357	60.2891	52.3009	49.9323	74.3163	75.5513	73.1894	63.1391	66.2854	64.5218	56.8833	56.4828	53.4531	42.4387	44.1966	49.9929	54.5201	56.6657	50.7944	70.3665
Seita.1G046100	0	0.0116	0	0.013082	0.011511	0.020365	0.01627	0.003423	0.011695	0.006945	0.008088	0.000716	0.007574	0.009427	0.014461	0.004703	0.001632	0.002524	0.008847	0.006989	0.005596	0.045775	0.023211	0.00566	0.128785	0.1195	0.191944	0.106475	0.055623	0.02051	0.067609	0.052035	0.03265	0.05276	0.119483	0	0	0.021439	0.006439	0.014132	0.015157	0.006759	0.041522	0.00525	0.002438	0.033032	0.004077	0.010136	0.035234
Seita.1G046200	3.69028	4.28221	5.30138	8.75066	6.87853	8.55466	5.59566	3.8537	5.99905	4.48351	3.76759	5.07343	2.26749	2.4519	5.72707	4.11443	3.61609	4.45562	3.42035	3.5091	2.57184	6.73908	5.52568	2.46926	4.4632	5.49416	7.80836	6.22281	5.36647	5.32239	8.85958	8.31598	7.71593	6.1299	5.83332	6.20863	3.8132	3.63189	4.93558	5.8397	4.94768	5.69744	4.91874	4.92413	4.86436	3.85477	4.16541	3.4329	7.19515
Seita.1G046300	9.50001	8.80479	11.2559	7.26826	8.59835	7.7027	14.3834	13.3116	19.5784	7.7054	6.86451	7.25554	7.73942	5.10734	9.18894	10.1298	8.71311	10.88	5.23438	4.35075	4.13514	6.54809	6.90149	7.03978	6.69198	6.86134	8.20866	8.5448	8.04445	7.93875	11.5525	9.23298	8.89298	6.5878	5.97117	6.19856	6.21278	8.31762	6.18081	10.6267	6.6917	7.96313	11.873	14.9034	14.6748	5.72312	5.37665	5.91293	4.61654
Seita.1G046400	4.46127	4.23841	2.79446	4.91884	5.71673	5.32027	19.0823	16.262	14.2565	0.347569	0.218222	0.200649	1.73663	2.45351	2.1965	24.763	26.4338	23.3518	0.430205	0.206202	0.739702	3.74877	3.5016	2.08826	14.2604	11.9251	8.29778	0.092011	0.217276	0.082895	3.54176	2.5704	3.14954	8.50578	9.60765	8.26445	0.566155	0.815868	0.176665	4.18213	3.84792	5.44017	24.3069	26.3578	31.0355	0.07935	0.093578	0.125097	2.41819
Seita.1G046600	6.61985	6.30492	8.17436	12.4026	9.55626	12.2863	8.46554	6.80054	5.92406	8.82924	8.5124	4.8279	5.11611	4.83839	6.59422	8.77333	7.16777	6.27822	5.56182	6.93753	5.23747	11.8727	11.1631	7.3189	12.5247	9.63964	8.80803	12.4167	12.3958	6.29501	9.64323	12.2319	9.65498	10.5863	10.0519	9.10474	8.76621	10.4584	9.26215	8.77299	8.04147	7.51945	6.52714	5.3491	6.71117	5.87675	5.61715	4.41971	10.6915
Seita.1G046700	0	0	0	0	0	0	0	0	0	0	0	0	0	0	0	0	0	0	0	0	0	0	0	0	0	0	0	0	0	0	0	0	0	0	0	0	0	0	0	0	0	0	0	0	0	0	0	0	0
Seita.1G046800	13.4088	12.1358	11.572	13.43	13.6228	10.7651	5.24702	10.5464	7.29544	3.43142	3.00101	2.50597	5.11472	8.44323	9.07152	4.52793	4.90209	4.79424	3.05428	2.11592	2.79662	1.36211	1.73489	8.04989	6.64573	7.31852	7.57264	0.309336	0.147053	0.268854	1.22712	2.39506	2.89979	1.02872	1.13837	1.36902	1.21943	1.03757	1.31312	0.542013	4.85595	2.54493	9.22462	9.871	7.39871	2.86092	3.92328	2.20786	3.04892
Seita.1G046900	26.8928	28.4367	26.0667	37.8756	22.9638	31.5035	21.9775	20.2662	16.2241	31.3972	30.346	30.6411	27.6329	26.806	28.6165	29.5006	26.2027	25.6586	36.7746	39.3074	31.1132	27.9956	25.9078	30.1085	22.4452	22.4774	16.3249	14.616	15.0458	11.0133	20.8354	17.6744	12.5563	21.1352	21.5146	20.3557	13.7679	16.6889	14.665	12.3368	17.4965	16.4417	16.1334	18.6146	20.211	35.1069	34.8411	32.3195	37.1387
Seita.1G047000	6.76079	6.70872	6.97854	15.8519	29.6589	19.2448	12.8443	12.1662	4.8552	30.5032	38.8983	15.3271	38.2522	47.4876	11.8808	17.2916	13.5144	13.4034	17.4935	17.7666	16.578	11.057	9.09408	20.8816	12.224	12.1782	8.0765	22.7589	23.0241	6.63502	9.50117	17.8052	14.43	6.34464	5.52984	6.88038	12.1433	15.0557	11.4978	17.9486	23.6586	24.1349	7.05921	7.58449	5.81981	15.7637	16.6902	15.8756	4.32312
Seita.1G047100	0.011115	0.942852	0.010087	0	0	0	0.023485	0	0	0.310177	0.083665	0.609914	0	0	0.067762	0	0	0	0.605598	0.395925	0.195941	0.693693	0.405741	0.021665	0.007726	0	0.022688	0	0.015524	0.029323	0.040646	0	0.035908	0.006137	0.031491	0.02021	0.034569	0.026139	0.051443	0	0	0.024932	0.023523	0	0.013976	0.660527	1.09673	0.798921	1.12205
Seita.1G047200	0	0	0	0	0	0	0	0	0	0.023983	0	0	0	0	0	0	0.011583	0	0	0	0	0	0	0	0	0	0	0	0	0	0	0	0	0	0	0	0	0	0	0	0	0	0	0	0	0	0	0	0
Seita.1G047300	0	0	0	0	0	0	0	0	0	0	0	0	0	0	0	0	0	0	0	0	0	0	0	0	0	0	0	0	0	0	0	0.007299	0	0	0	0	0	0	0	0	0	0	0	0	0	0	0	0	0
Seita.1G047400	0.266743	0	0.124353	0.195029	0.082093	0	0.171194	1.8762	1.14092	3.10701	2.05564	1.67318	0.196476	0.734396	0.017439	1.55808	0.814855	2.37391	0.914754	1.01342	0.4591	0.309163	0.322243	0.089001	0.514967	0.054088	0.741601	1.30213	1.08653	0.572099	0.037438	0	0.173411	0.530983	0.134681	0.979748	0.352736	1.33118	0.635964	0.275997	0.419741	0.017303	0.212554	0.852785	1.28445	1.70373	1.70293	0.745633	0.053222
Seita.1G047500	1.77479	1.43679	2.10471	4.58361	4.62677	4.19657	3.91451	2.90353	5.49414	1.74086	1.19488	2.01313	1.25496	0.622742	1.81301	5.06015	4.92602	5.37673	1.73249	1.6148	1.40212	3.20342	3.40593	1.68967	5.05207	6.36284	10.0114	3.3458	4.05766	4.47694	3.88753	3.4803	5.64677	6.8597	7.17633	6.69634	2.72884	2.99303	2.71395	3.62092	3.03909	4.69718	4.11028	3.2776	5.46313	1.35007	0.931336	0.994201	1.53668
Seita.1G047700	0	0	0	0	0	0	0	0	0	0	0	0	0	0	0	0	0	0	0	0	0	0	0	0	0	0	0	0	0	0	0.063168	0	0	0	0	0	0	0	0	0	0	0	0	0	0	0	0	0	0
Seita.1G047800	6.44414	9.33786	6.03138	10.8002	7.47037	10.7575	6.77759	3.4502	2.59154	4.68326	2.0455	2.83213	6.10794	7.11514	5.79272	4.47441	5.94909	6.52321	4.66192	4.59513	5.03822	11.7813	3.71856	3.30559	4.8282	11.3686	5.52459	3.41735	3.91543	4.57786	14.368	10.5273	6.08363	7.76731	8.88403	5.63601	5.58376	4.1832	3.56457	5.54494	8.02131	9.94329	6.2208	8.20902	7.82061	5.88065	4.30632	5.04718	27.3166
Seita.1G047900	0.095543	0	0	0	0	0	0	0	0	0.054449	0	0	0	0	0	0	0	0	0	0.080397	0	0.0548	0	0	0	0	0	0	0	0.146591	0.200569	0	0	0	0	0	0	0	0	0	0	0	0	0	0	0	0	0	0
Seita.1G048000	0.124785	0.095631	0.072215	0.090043	0	0	0.084124	0.110762	0.03047	0.107017	0.042944	0.016816	0	0	0.069418	0	0.041974	0.064867	0	0.037973	0.036591	0.11059	0.209014	0	0.196026	0.363014	0.404212	0.120248	0.150451	0.099038	0	0.042058	0.122976	0.103	0.110753	0	0.019535	0.038404	0	0.053876	0	0	0.032344	0	0.078975	0.195787	0.083206	0.251148	0.036049
Seita.1G048100	4.02996	7.32737	3.3304	1.60747	5.05128	2.03557	2.85389	3.02036	3.16624	3.7338	4.49827	2.66294	2.27785	8.97709	5.85524	4.90188	3.90104	4.01624	2.63222	2.20602	2.33748	3.68635	9.36455	3.34354	4.16663	1.8193	2.71727	6.01036	2.60577	3.07114	18.7165	5.67995	4.3386	3.40033	2.73068	2.69234	2.95911	2.22952	2.40985	9.6915	3.46995	5.43959	3.16306	4.74767	3.84183	2.17448	3.03656	2.21298	9.69243
Seita.1G048200	2.63528	4.06317	0.583119	0.417528	1.84122	0.491406	0.117326	0.084074	0.208	0.314992	0.341552	0.299294	1.02104	3.54375	3.30021	0.009475	0.24267	0.109154	0.334988	0.196341	0.182937	0.333484	0.628537	1.28008	0.03944	0.036359	0.140079	0.625579	0.512891	0.411211	0.47102	0.391963	0.307526	0.128055	0.112496	0.16145	0.287915	0.2414	0.401899	0.811302	0.394634	0.326247	0.184797	0.166559	0.143911	0.356278	0.449381	0.330785	2.97976
Seita.1G048300	4.08962	4.40628	3.90617	5.29518	4.32507	5.01984	6.03618	5.75632	4.54366	1.82382	2.46551	1.59292	2.12798	2.66855	4.36267	4.5602	5.0368	4.49343	2.03207	1.78977	1.83569	3.72175	3.5254	2.33826	5.07288	3.57924	4.05361	3.89113	4.96959	2.07483	6.73246	6.45694	3.69554	3.13899	3.76229	5.50636	2.35704	1.89613	2.23933	5.45674	4.5496	4.53939	3.88452	4.88067	4.74963	1.53509	1.66068	1.79852	4.21906
Seita.1G048400	3.60447	4.70437	4.98521	5.40865	6.28562	6.80752	7.85839	5.45165	5.97505	8.78716	7.57677	6.48083	6.656	6.02987	4.96206	7.30172	8.58574	7.59829	6.34398	5.71307	3.96832	5.35159	7.63963	8.65019	9.91496	9.81384	8.26923	12.3013	14.2676	9.48611	13.0908	15.1372	7.76651	9.11778	9.40386	7.50607	9.08023	9.61101	9.52394	9.62524	6.7633	7.54967	6.4689	6.66253	6.06935	4.28531	5.0476	5.33688	3.39932
Seita.1G048500	10.1539	11.562	11.5803	16.0804	13.5252	16.13	9.0395	10.1227	6.55685	11.3962	13.404	6.94041	16.0676	12.092	8.1506	9.85632	10.1903	9.81747	10.9888	9.7126	10.0438	15.9958	14.4644	15.9324	18.975	12.2479	8.83275	12.5331	16.727	9.01719	19.2575	15.548	10.6148	12.5577	11.7883	10.6392	13.1784	12.6208	12.878	11.4449	13.0889	10.6972	8.88859	10.5862	8.85925	12.2922	10.7217	11.2533	15.2455
Seita.1G048600	0.441853	0.040022	0.169778	0.373493	0.379504	0.229288	0.863064	0.913007	1.16898	0.661289	1.82879	0.875026	2.64415	1.52695	1.19887	1.59292	1.16297	1.23844	1.52986	1.04773	0	2.88522	1.47319	1.54391	2.23079	2.07663	1.15926	1.84275	1.45798	1.24836	5.45847	2.21351	1.52496	1.95462	1.55884	1.4211	1.97751	1.18968	0.540768	2.44427	1.41932	1.92299	0.078366	0.088613	0.046817	0.060137	0.032737	0.011028	0.167732
Seita.1G048700	0	0	0	0.100704	0	0	0.793844	0.491741	0.48688	0	0	0	0	0.059325	0.131859	0.268313	1.17037	0.584103	0	0	0	0.126798	0.10113	0	0.294417	0.25488	0.174793	0.063676	0	0	0.059145	0.034158	0.020727	0.051438	0.079062	0.111011	0	0	0	0.10823	0.154568	0.103262	0.518999	0.640888	0.62297	0	0	0	0.053827
Seita.1G048800	0.023063	0.149308	1.00012	0	0.09731	0	0.019647	0	0	3.07436	1.35939	3.3124	0.022553	0.046582	0.779992	0.046606	0.02436	0.046581	2.55829	2.27571	2.49063	2.24633	1.73004	0	0	0	0	3.36019	2.30549	3.21733	0.194817	0.162826	0.291484	0.020194	0.152027	0	2.03431	2.07958	2.47168	0.116708	0.011545	0.296841	0	0	0	2.21457	2.6492	2.72585	1.15633
Seita.1G048900	3.02587	3.63888	5.00626	8.57526	7.65104	8.71388	3.92824	2.94179	3.67601	8.00556	8.45	8.26322	5.37701	3.56719	5.07475	5.90604	6.68773	6.53226	5.50917	6.46411	5.08446	9.98879	9.69326	7.04696	9.14577	8.33458	5.66893	6.39408	9.77432	5.05953	9.93077	9.6507	9.18085	8.34839	6.53223	7.83272	8.19396	7.0125	7.19327	8.87713	8.22603	7.63233	5.06492	4.01556	4.80619	5.83871	5.25339	4.8841	6.63009
Seita.1G049000	38.1898	34.3367	29.2477	41.454	35.4426	40.2857	25.4033	26.4328	23.9906	23.0962	15.2511	28.3748	17.3577	27.2855	16.9864	35.5619	33.7719	31.6202	30.1167	23.7113	22.4857	17.7293	17.3884	19.4996	49.7739	50.1897	47.8434	14.3777	11.6155	17.4862	16.3692	10.4958	10.7253	55.994	67.0929	49.4862	31.6869	39.5229	28.9083	8.57636	16.2826	12.4083	36.8875	36.959	38.0204	35.9556	39.5937	43.6981	21.1859
Seita.1G049100	0	0.092379	0.027986	0	0	0	0	0	0	0	0.063253	0.113413	0	0	0	0.019782	0	0.039609	0	0	0	0	0	0	0	0	0	0	0	0	0	0	0	0	0	0	0	0	0	0	0	0	0	0	0	0	0	0	0
Seita.1G049200	6.60236	6.90489	8.45756	4.44505	5.4424	4.60858	4.27548	4.93205	4.20315	15.9335	14.7701	12.6143	15.3132	12.1828	6.7914	5.49304	4.55553	4.33094	16.7729	13.8868	17.6805	7.81254	8.48972	10.1313	8.55607	8.53003	5.01268	9.98066	10.2612	7.97205	4.62045	5.00317	4.07287	6.31554	4.33955	5.14614	9.52087	10.5136	12.6393	6.70178	4.98895	4.30768	2.53592	3.60586	3.92572	17.6599	9.74099	16.3429	3.02044
Seita.1G049300	0	0	0	0	0	0	0	0	0	0.141993	0	0	0	0.368929	0	0	0	0	0.145407	0	0	0	0	0.0439	0.063581	0	0	0	0	0	0	0	0	0	0	0.08608	0.060429	0	0	0	0	0.069467	0	0	0	0.067745	0	0.062118	0
Seita.1G049400	15.7243	17.3123	17.02	24.7127	21.6734	22.4223	23.1656	20.9269	29.3338	11.5257	8.49465	12.4415	12.161	10.9986	16.5009	23.9411	22.9308	27.6811	12.3366	12.8027	12.0881	17.2948	16.6621	12.5522	21.2814	24.3733	30.3333	13.1504	11.0997	13.8265	10.6639	12.7883	18.8257	22.8082	23.8446	24.4255	11.9178	14.0318	12.8026	12.412	13.6519	13.5072	35.14	29.7309	33.2665	12.6722	13.4441	11.8033	20.5425
Seita.1G049500	10.3223	10.8855	12.0379	10.8848	10.2873	12.8052	26.1009	27.6588	17.3168	18.1283	20.6365	14.7911	16.0934	13.1477	12.274	29.0812	24.655	23.4454	17.6248	14.8018	15.2186	14.9357	12.6463	14.8657	20.7063	20.7241	12.1258	14.7945	15.5307	8.43854	11.5088	8.25068	9.03961	17.6609	17.2615	17.0756	14.0587	14.3624	15.2382	9.59651	10.8297	8.57334	17.9758	21.2277	23.6858	19.1958	17.924	17.81	9.14005
Seita.1G049600	5.17134	5.39207	4.09062	7.14484	5.28752	6.9211	2.62292	2.64257	1.85692	4.95061	5.1616	3.75366	4.28061	3.58791	3.62203	3.44392	3.26654	2.40818	4.67957	3.29215	3.31676	6.96427	5.82421	4.70928	5.05337	4.01637	3.64207	4.4326	4.76537	3.30493	8.32936	6.32639	3.83562	4.42608	4.55719	4.48015	3.7535	3.72772	3.7378	5.856	4.77665	5.61544	2.52319	2.23382	2.56598	4.82055	5.19251	5.28419	6.15851
Seita.1G049700	209.64	217.207	227.493	231.713	206.749	222.406	151.737	146.223	106.919	184.267	193.316	113.141	180.343	184.551	155.001	145.727	142.47	144.947	137.415	155.405	159.494	220.606	229.272	203.024	158.52	137.078	96.0843	242.644	188.584	130.098	265.617	220.001	196.131	166.637	157.274	162.709	249.789	251.171	242.199	240.169	233.372	212.739	119.187	141.763	134.156	142.461	126.669	134.326	183.023
Seita.1G049800	0	0	0	0	0	0	0	0	0	0	0	0	0	0	0	0	0	0	0	0	0	0	0	0	0	0	0	0	0	0	0	0	0	0	0	0	0	0	0	0	0	0	0.170597	0.1154	0.059559	0.061487	0.107931	0.068973	0.14082
Seita.1G049900	37.4115	30.778	35.8529	47.3996	45.2104	36.0124	15.1211	12.5325	19.2269	15.7589	11.6573	21.2163	19.0284	26.5803	29.0308	19.7459	15.6307	20.7351	17.7682	17.9193	20.6987	14.268	16.4329	28.6185	11.2435	14.1838	19.5427	11.3786	10.2504	13.7249	4.97456	5.65554	26.1197	15.7204	15.4903	14.0686	18.1726	16.3866	17.7682	17.4139	21.7972	19.5129	16.8903	14.7558	16.6548	13.3697	15.7675	16.3465	17.1513
Seita.1G050000	2.60553	2.88181	2.64429	2.87201	2.33304	2.63001	0.1734	0.058764	0.059257	0.706451	0.791013	0.746926	2.19882	3.11538	2.96686	0.236455	0.19269	0.209354	0.428284	0.375607	0.339558	3.88464	3.41582	2.18421	0.536542	0.253112	0.561119	0.826658	0.603733	0.55446	1.43404	1.23851	1.08966	0.286366	0.084509	0.381883	0.433479	0.313591	0.324882	1.15311	1.70424	1.31299	0.257232	0.219786	0.191155	0.351665	0.406273	0.364994	5.78804
Seita.1G050100	228.186	216.398	272.154	161.607	180.856	176.687	148.62	148.525	107.615	142.622	197.1	91.2536	241.653	202.789	178.413	137.909	131.479	132.726	150.46	128.981	129.142	258.289	243.826	246.118	38.9376	109.243	73.9072	148.256	152.214	76.2326	136.685	193.026	148.319	106.317	94.3005	100.336	177.553	176.948	154.2	235.408	224.511	215.003	97.6113	125.974	111.52	101.612	101.659	113.809	133.319
Seita.1G050200	0.331372	0.251259	0.222953	0.777431	0.97857	1.15519	0.893817	0.685172	1.10586	4.74028	3.25749	3.91843	0.010583	0.037769	0.187739	1.10863	0.951995	1.69482	4.06573	4.01072	4.06679	0.247072	0.179538	0.039442	1.30267	1.46678	1.7304	4.95546	3.50793	2.921	0.565487	0.090392	0.820665	1.75651	1.48838	2.01641	3.65277	2.53136	3.14201	0.054914	0.157168	0.089054	0.331164	0.746597	0.488365	3.84361	3.47142	3.12917	0.063722
Seita.1G050300	6.64771	8.93939	7.00902	5.58001	5.15224	5.27872	2.25379	1.87199	2.05513	2.65572	2.4243	2.69156	3.95958	5.00438	5.18706	2.79795	3.23454	3.06547	3.45029	3.50727	2.99689	7.0055	5.84059	5.59873	2.21163	2.73312	2.78682	2.42362	2.75753	1.47535	5.34707	3.7597	3.20915	1.72568	2.35141	2.16162	2.67999	2.97465	1.86941	2.30483	4.70572	3.38209	4.24117	3.35907	4.69292	3.91749	4.75252	3.99566	11.8289
Seita.1G050400	10.0943	9.51853	10.1187	14.1881	8.08019	12.0687	5.09349	7.4246	4.74639	33.0398	21.2074	26.3127	10.8726	12.7697	8.40067	3.91404	4.22388	4.82254	28.0676	32.9669	30.3148	5.84617	5.78549	16.4201	5.63881	5.53787	4.28137	5.81621	6.43553	9.33426	0.292253	3.18802	3.28505	2.66577	2.96016	3.11344	9.7806	9.43038	8.83958	2.73848	9.16444	3.50543	5.01665	5.64221	4.09164	26.3566	22.3874	30.7727	0.790946
Seita.1G050500	0	0	0	0	0	0.048192	0	0	0	0.042117	0.060369	0.079274	0	0	0	0	0	0	0.153947	0.030815	0.011842	0.058629	0	0	0	0	0	0	0.050041	0.06947	0	0	0	0	0	0	0.05419	0.052733	0.028513	0	0	0	0	0	0	0.037282	0.064207	0.250453	0
Seita.1G050600	10.6092	11.0729	10.1314	15.4875	13.9418	16.0609	8.60203	6.86658	9.88811	9.52314	11.8344	12.6514	9.92736	9.04725	14.6439	8.04651	8.64941	7.0338	9.89158	10.1033	9.65817	13.8802	13.5656	11.007	14.3277	11.5223	14.2212	15.0326	14.4578	15.0961	17.2624	13.8485	15.3921	12.6037	11.2572	11.1687	13.7984	13.4462	15.6227	12.9635	14.0183	13.6097	7.66346	7.06828	7.90346	9.98006	9.71593	8.10594	13.7775
Seita.1G050700	114.275	122.201	184.344	9.78429	113.611	49.2021	2113.02	1955.46	3811.99	0.566953	0.059053	0.228008	46.5017	47.6694	226.267	2327.87	1945.98	2560.95	0.609925	0.244047	1.25564	197.713	153.925	12.7992	646.781	863.189	1954.51	0.802208	0.182699	1.34395	83.0687	175.191	336.196	1513.55	1640.61	1298.02	12.2853	0.380582	0.518263	91.7632	93.6011	197.168	2667.04	2335.42	2653.31	0.024209	0.452629	1.48619	219.401
Seita.1G050800	0.208036	0.071874	0.123077	0.307132	0.202869	0.235626	0.819696	0.051394	0.190701	0.014333	0.050538	0	0.076693	0.038703	0.262771	0.178214	0.108618	0.165126	0	0	0.014162	0.069265	0.096163	0.157039	0.288675	0.770531	0.720409	0	0.016977	0	0.066461	0.018937	0.620152	0.827286	0.34148	0.392586	0	0.014715	0.014041	0.08635	0.094228	0.375988	0.150817	0.06083	0.095813	0.007193	0.014126	0	0.039965
Seita.1G050900	0	0	0	0	0	0	0.002169	0.006539	0.014385	0.014247	0.002984	0.002533	0.004979	0	0.019026	0.009608	0	0	0	0	0.013142	0.012131	0.004919	0.006431	0	0	0.016599	0	0	0	0	0	0.038817	0	0.008022	0.005626	0	0.002477	0	0.008998	0.004621	0.016069	0	0.006727	0.002538	0.001956	0.007876	0.001993	0.013635
Seita.1G051000	2.92186	2.27556	3.19023	3.34909	3.77615	3.22087	1.45666	1.52033	1.70359	1.48509	1.3354	1.37364	2.69591	1.99229	3.03029	1.97824	1.69545	1.60952	1.06247	0.840026	1.00388	3.34492	3.18957	1.77136	2.3173	2.60883	3.03	2.76877	2.74057	1.70912	4.44262	4.54505	4.51236	2.87191	2.80448	3.21374	2.08231	2.53578	2.28942	3.21352	2.48446	3.14941	1.97381	1.3302	1.71227	1.37639	1.0248	1.00498	2.05206
Seita.1G051100	6.29934	4.97991	5.59617	6.76028	6.5298	6.12441	11.6327	9.59273	10.4059	5.88757	7.10796	7.452	7.68407	6.15913	4.8749	13.0683	11.19	11.8126	7.59951	5.99887	5.80326	4.60247	5.07732	5.17417	9.81737	10.3594	9.03102	7.82188	7.24209	5.57598	11.6127	5.99942	6.33517	11.9777	13.2955	13.4864	6.70154	8.23698	8.13583	6.70586	7.46917	6.62753	9.15544	10.9346	11.5063	5.13099	5.33581	5.53361	3.76578
Seita.1G051200	6.87531	7.07247	9.47633	9.46578	9.17091	8.28691	7.07921	6.34285	6.70297	9.15664	10.0852	7.59516	10.7248	8.43759	8.3962	10.2875	9.63821	9.82105	7.87293	6.09357	7.41078	13.9494	12.6985	7.06195	11.9546	11.0395	7.4563	11.8188	14.0257	6.77096	23.8447	10.8043	9.6799	7.33038	8.63312	9.40535	8.95677	9.25877	10.2785	12.2476	6.89486	7.12256	7.0331	6.96301	7.77777	5.41218	4.20988	5.10115	4.58459
Seita.1G051300	29.1256	30.2821	31.7195	35.7628	34.907	36.288	31.1786	29.0965	30.37	35.7366	33.0403	42.3893	27.282	27.3676	35.415	38.1029	38.0777	31.293	48.2919	52.3531	45.934	43.6278	43.5638	23.0243	33.513	36.6289	33.9263	41.5381	40.5859	56.6566	26.4837	25.9341	31.0144	40.9602	38.2592	36.6361	55.9493	58.3895	62.2558	21.7316	25.499	29.0563	35.3279	32.6964	40.8465	55.7246	57.3663	46.4135	46.6312
Seita.1G051400	0	0	0	0	0	0	0	0	0	0	0	0	0	0	0	0	0	0	0.03462	0	0	0	0	0	0	0	0	0.024798	0	0.114789	0	0	0	0	0	0	0.048292	0	0	0	0	0	0	0	0	0.03079	0	0.032238	0
Seita.1G051500	0	0.049685	0.039748	0	0	0	0.047286	0.097348	0.003445	0	0	0	0.041975	0	0.037075	0.125241	0	0	0	0	0	0.021169	0.060149	0	0.046418	0.027647	0	0.019635	0.035389	0.025312	0	0	0	0.053243	0.028777	0.054085	0	0.05273	0	0	0	0	0.044845	0.037684	0	0	0	0	0.055948
Seita.1G051600	0	0	0	0	0	0	0.029852	0	0	0.032315	0	0.070701	0	0	0	0	0	0	0	0	0	0	0	0	0	0	0	0	0.077619	0.023719	0	0	0	0	0	0	0	0	0	0	0	0	0	0	0	0	0	0	0
Seita.1G051700	21.7065	20.6175	20.8129	25.1349	21.2537	23.003	14.0136	13.5215	13.4312	18.3679	16.616	15.4884	19.1737	16.3563	19.1879	13.1297	14.8908	14.0673	15.9609	15.3654	16.3753	17.9335	20.2491	19.4558	10.2529	11.5568	10.7986	20.745	20.1455	12.8075	17.637	20.2435	15.0844	14.8554	12.0838	13.4429	16.4515	19.0369	18.1653	19.3205	18.5014	19.4594	11.8285	10.9496	14.2086	17.0185	17.8588	16.3074	20.9979
Seita.1G051800	13.4831	14.9786	13.0778	20.2564	14.9804	18.2501	11.794	11.3171	9.66206	9.24422	13.3499	8.03716	11.927	15.3209	14.5595	12.6713	12.6974	11.4969	9.84305	8.71598	8.3047	21.6131	20.0832	15.8589	12.9575	13.4399	9.59825	11.4514	12.3258	8.14008	12.4375	14.5404	11.6283	10.1839	10.7989	9.40626	10.2737	11.118	10.2559	12.8387	16.9391	15.1897	9.07803	10.0237	9.81695	7.88392	7.94082	8.85319	11.8633
Seita.1G051900	6.84842	8.98981	9.39973	9.45365	9.63667	7.46579	7.71093	9.72518	9.20525	8.16406	8.70968	7.99253	9.07326	7.36596	10.3385	10.3304	9.22724	9.09164	7.74098	8.47358	7.64727	8.55469	7.92779	8.61916	8.10951	9.46226	9.52129	8.58404	6.95844	9.34401	15.4355	8.0522	9.46049	10.5722	10.8566	10.9234	10.3986	10.0683	10.2457	10.3782	8.10794	9.67678	9.92138	7.80323	10.2187	9.4293	8.60894	5.97462	7.93517
Seita.1G052000	12.3071	14.4919	16.743	16.1741	17.7354	15.3681	15.0726	14.5017	11.351	23.4194	21.186	18.9112	21.8946	17.2381	10.5936	22.0004	20.0109	19.7671	24.617	22.5435	23.2219	15.4932	16.6141	22.7054	25.194	24.9605	21.9319	29.1114	29.6001	21.9783	22.9116	17.3475	20.8952	32.3623	33.1642	33.8593	38.1007	37.7749	39.8278	27.6292	26.3325	24.3864	13.7107	13.0495	13.0101	19.5605	19.712	22.0185	10.081
Seita.1G052100	3.74404	3.07987	3.76921	4.66144	3.61112	3.8969	2.35358	1.831	1.51774	3.17303	4.97949	2.00974	2.67571	2.38008	3.0668	2.57332	2.38315	2.31207	2.74546	2.77277	2.26738	3.0158	4.93745	10.0202	3.17613	2.66529	1.66123	3.06148	3.30807	1.95855	2.77935	2.14772	1.65218	2.59244	2.81855	2.81147	1.85104	2.28692	2.30755	3.3146	3.86433	3.40286	1.67369	2.16425	1.90806	2.68581	2.74905	2.31755	2.07427
Seita.1G052200	0.092256	1.08405	0.177485	0.306959	0.127085	0.220005	0.133869	0.052834	0.061989	0.23866	0.20601	0.319491	0.062263	0.044328	0.205471	0.118148	0.083708	0.073977	0.388341	0.350043	0.309441	1.25216	1.15131	0.173273	0.168696	0.085533	0.182374	0.27902	0.154248	0.209377	0.409367	0.253029	0.218408	0.109599	0.100036	0.15218	0.076418	0.215266	0.190748	0.152149	0.085921	0.12947	0.078596	0.074798	0.088409	0.667525	0.95201	0.635437	1.31509
Seita.1G052300	0.100364	0.100264	0.13661	0.127446	0.091807	0.093914	0.058741	0.018146	0.041316	0.149867	0.254419	0.078334	0.028927	0.039831	0.126646	0.065673	0.119139	0.065987	0.143911	0.070102	0.127501	0.198199	0.118784	0.098306	0.080901	0.102467	0.066501	0.164807	0.097697	0.095138	0.034679	0.05803	0.057195	0.04714	0.032384	0.051537	0.054824	0.093465	0.089378	0.031791	0.088183	0.140003	0.033092	0.067347	0.164222	0.224441	0.300438	0.151752	0.175617
Seita.1G052400	3.54412	3.2673	3.48792	4.76065	3.35193	3.69507	1.84708	1.03236	2.72166	3.41072	3.51556	3.75274	1.56706	1.9622	3.80177	2.41759	2.65958	2.30459	4.98489	4.74952	5.01379	3.25323	3.50949	2.78345	1.26642	1.57046	2.32544	2.92494	3.29476	2.70637	1.85006	1.65947	2.34815	2.34223	2.00405	2.59187	3.19714	3.51245	3.8446	1.37045	2.28456	2.32262	2.23069	1.8898	2.48405	5.50742	4.57653	4.75366	3.9992
Seita.1G052500	0	0	0	0	0	0	0	0	0	0	0	0	0	0	0	0	0	0	0	0	0	0	0	0	0	0	0	0	0	0	0	0	0	0	0	0	0	0	0	0	0	0	0	0.067389	0.088475	9.99248	9.45974	12.6654	0.400331
Seita.1G052600	0	1.60289	0	0	0	0	0.448262	0.12849	0	0.889554	0.465506	1.09152	0	0	0.309979	0	0.075071	0.034494	1.17597	1.22137	1.2958	1.62513	1.99112	0	0	0	0	0.037115	0.116371	0.1358	0.630013	0	0	0	0	0.034466	0.103169	0.352013	0.096997	0	0	0	0	0.052957	0	1.30625	3.0531	2.09714	2.53285
Seita.1G052700	22.0557	23.0794	23.7424	34.0751	27.0117	34.3653	18.4841	16.2494	15.6978	33.1118	35.6829	28.7769	27.248	28.589	21.7795	21.2119	21.2538	18.9108	30.2134	27.3989	27.8382	34.772	31.2541	35.1388	33.3725	26.7105	22.0622	30.6764	27.4606	21.1154	30.5509	31.2121	23.2021	24.3559	27.579	24.7928	28.9517	33.5122	29.4447	33.4167	34.0633	26.8543	13.7717	13.8389	16.3382	27	30.9415	27.6569	20.4886
Seita.1G053100	0.671758	0.658607	1.16517	1.07227	1.37287	0.80342	0.290772	0.250079	0.712403	6.12424	8.10522	5.28507	0.091758	0.096039	0.468949	0.197759	0.106877	0.120816	3.47151	2.58487	2.54077	0.073141	0.082357	0.037618	0.032255	0.071647	0.480252	9.27431	8.60991	3.15981	0.01473	0.120422	0.023927	0.06367	0.027581	0.049806	2.94384	3.60868	3.6971	0.052024	0.057416	0.056076	0	0	0	3.81608	3.83702	3.02242	0
Seita.1G053300	0	0	0	0	0	0	0	0	0	0.229889	0.752333	0.507156	0	0	0	0	0	0	0.685012	0.626867	0.290542	0	0	0	0	0	0	0.192159	0.183881	0.021832	0	0	0	0	0	0	0.315624	0.66604	0.59959	0	0	0	0	0	0	0.144636	0.300827	0.060929	0
Seita.1G053400	0	0	0	0	0	0	0.016729	0	0	0	0	0	0	0	0	0	0	0	0	0	0	0	0	0	0	0	0	0	0	0	0.00845	0	0	0	0	0.062684	0	0	0	0	0	0	0	0	0	0	0	0	0
Seita.1G053500	0	0	0	0	0	0	0.221967	0.057659	0.165026	0.595547	0.38576	0.506726	0	0	0	0.189089	0.565662	0.156981	2.98681	2.73798	1.92191	0	0	0	0.033844	0	0.062669	0	0.034003	0.011073	0.030912	0	0	0.281566	0.202194	0.177664	0.030286	0.08961	0.070209	0	0	0	0.141681	0.081603	0.045916	0.833576	0.99296	1.25229	0.028133
Seita.1G053600	0.157951	0.068784	0.029056	0.285606	0.066685	0.323173	0.218114	0.100995	0.095206	0.709598	0.433638	1.20877	0.177986	0	0.08442	0.181065	0.443693	0.079744	3.71015	5.11718	0.645676	0.101925	0.061288	0.193293	0.048136	0.066325	0.317533	0.342286	0.356569	0.820516	0	0	0.053525	0	0.188896	0	0.256546	0.560139	0.143307	0	0.073039	0.01539	0.152661	0.118601	0.259574	1.80492	1.73389	1.8175	0.047703
Seita.1G053700	2.42128	3.47836	3.05999	2.45298	3.21837	3.0257	0.984258	1.37855	1.48293	2.84737	1.71642	1.35976	3.44061	3.49242	2.35145	1.4215	0.429568	1.27978	1.57166	1.7327	2.15965	4.46602	3.48251	4.07969	3.24229	2.70984	0.658916	2.59065	5.97515	1.28118	2.08281	4.17201	1.25177	2.09354	1.0255	1.15161	1.40619	1.51688	0.471942	1.26018	1.45465	2.36643	2.13833	2.27275	1.36682	4.01842	5.10229	5.66933	10.4077
Seita.1G053800	4.13046	3.24071	2.42468	2.26363	1.4419	2.72669	3.60568	1.13455	3.72035	28.3105	18.6389	30.0623	0.570912	1.98612	1.21607	5.28068	5.02612	6.2234	30.8878	38.0887	38.3995	3.06558	4.33664	6.34549	4.04763	3.25496	12.2435	5.78186	8.02166	29.4352	0.46864	1.32268	5.98398	5.90598	4.2669	4.38205	10.5494	11.5499	11.4497	2.26851	3.24823	7.84433	3.97792	2.82006	1.53912	40.7861	40.9129	37.7691	3.39364
Seita.1G053900	15.7503	23.5547	11.2001	31.197	47.2901	39.8932	122.602	122.03	102.977	0.041931	0	0.04463	22.2141	19.9741	21.5045	124.89	157.371	132.589	0	0.12943	0.124299	17.2262	15.0476	16.5085	135.476	154.597	115.516	0.704071	0.571018	0.542283	32.0219	30.2025	50.3919	75.2996	94.1853	89.3245	0.949378	0.992324	0.451711	19.6892	33.9214	26.2057	270.938	198.427	198.453	0.034461	0.157907	0.284385	17.213
Seita.1G054000	24.3403	68.9656	80.2422	63.7483	102.654	47.6798	3.49314	0.239312	1.65137	4.50031	2.8179	11.635	24.8615	28.9917	224.736	0.557224	1.61898	1.97179	4.67009	6.66719	4.49963	194.509	164.465	4.24233	0.291434	0.148649	1.14154	0.88209	0.894204	1.33574	33.2399	80.9443	134.005	0.100257	0.059958	0.193116	0.808264	2.9698	0.586578	39.1818	10.0847	33.0046	1.71367	1.06218	0.820896	10.3322	10.5561	5.29368	263.949
Seita.1G054100	3.6033	3.59759	5.26898	4.88012	5.55638	4.53897	2.64222	2.12256	3.23909	3.18965	4.58705	3.22864	3.4571	3.11694	5.75638	2.16614	2.44078	2.07294	3.5535	3.25753	3.98407	6.1469	6.56264	3.75799	2.59422	3.48597	4.52798	5.41129	6.20807	4.99227	6.89895	4.38455	5.15455	3.41566	3.37671	3.78504	4.92107	5.17509	5.24821	3.92586	3.19103	4.65538	2.67233	1.87543	2.38878	3.12467	2.57322	3.2247	4.05551
Seita.1G054200	7.41	7.69917	7.50414	8.51017	8.27686	8.34536	7.14763	6.35134	7.92089	8.2264	7.75687	9.82582	8.72214	7.78058	10.8448	10.6224	9.57997	9.04954	10.3974	10.8107	9.04054	11.3871	13.2254	11.8807	8.53474	9.67246	10.0142	7.84574	6.96388	8.01184	10.0656	8.33148	9.48485	11.1289	12.116	11.2544	11.9549	12.2498	11.7443	11.5639	10.2276	11.4946	6.89361	5.68968	4.48205	7.32435	7.39101	6.02964	5.92968
Seita.1G054300	0.80149	0.0633	13.1735	0	1.05161	0.161896	0	0	0	30.1144	25.9375	39.9306	0.076074	0.078038	4.42534	0	0	0	15.1901	12.8868	14.8598	5.2595	5.74286	0.082539	0	0	0	22.9471	17.8693	18.7238	0	0	3.22458	0.067889	0	0	14.4012	14.8854	10.4953	1.60736	0	3.24773	0	0	0	12.9413	22.9672	17.3171	1.02905
Seita.1G054400	74.0388	64.5299	78.346	17.1608	27.4317	26.9827	4.69618	6.38873	2.83528	87.6004	144.035	60.297	455.747	108.663	77.4329	11.4472	7.96434	10.7771	55.6994	41.8461	31.8414	175.027	124.986	285.844	1.90274	0.96326	0.724714	90.179	103.145	30.4771	11.3621	39.9024	32.1539	0.240189	0.129278	0.913718	71.5682	80.6267	72.8879	26.6987	21.8912	20.176	0.747469	2.28693	1.41269	34.5287	42.4101	50.4886	27.6604
Seita.1G054500	3.11449	3.3761	3.0406	4.98998	5.58749	6.08378	2.28433	1.92709	2.49864	6.83606	8.31482	9.07837	5.07816	5.51609	5.57876	3.35848	2.84022	2.64077	7.66002	8.19965	8.10059	4.68289	4.22094	3.53607	5.34709	3.9497	6.26715	11.1702	12.6084	14.0812	5.30775	7.65271	8.62492	6.08079	5.40418	6.1479	13.5777	13.695	13.1918	6.95454	5.29838	7.7638	1.16502	1.58356	1.67713	4.99317	3.59008	4.93456	4.9775
Seita.1G054600	0.064296	0	0.227431	0	0	0.062957	0	0.080541	0	1.93637	4.39203	0.908334	0.794793	0.185203	0.081917	0.391832	0.407731	0.117333	0.394805	0.055228	0.591238	0.127127	0.335596	1.07742	0	0	0	0.279693	0.22534	0	1.04832	0.560024	0	0	0	0	0	0.110588	0.152353	0.209426	0	0	0	0.08632	0.106152	0.455062	0.45893	0.329165	0.021525
Seita.1G054700	0.420646	0.588608	0.803816	1.29176	1.20196	1.0162	1.27086	0.88897	1.60983	2.8166	2.10947	3.20153	1.54342	2.90902	3.46262	0.98902	0.418785	1.19109	1.8393	1.3512	1.47474	2.17098	2.95349	1.58853	2.12568	2.23898	3.72653	1.27926	1.05639	1.75798	4.37328	2.89989	3.76913	0.726193	0.608854	0.710183	0.421164	0.309411	0.274195	2.01822	0.760075	0.919818	0.172521	0.179621	0.347147	2.57151	2.55066	1.8934	1.01704
Seita.1G054800	5.89897	7.48707	6.3117	7.95565	15.5555	9.11654	2.80064	3.10814	2.77775	0.620523	0.534849	1.94415	1.76132	3.17058	5.21614	1.76378	1.34535	1.54338	4.95456	3.59645	3.7906	7.67262	8.37008	4.55237	2.39013	3.02602	3.78873	0.688522	0.834979	0.765439	10.3229	13.533	13.2897	1.29313	1.53937	1.35998	10.4783	13.0269	8.38041	14.3454	9.36994	19.7395	2.57259	1.59824	2.24381	7.99165	8.91853	8.31424	9.89973
Seita.1G054900	6.59305	6.29434	8.3302	6.17814	7.4788	6.43413	6.82812	8.4515	4.78497	7.57503	9.20829	4.63489	9.19349	8.8097	6.72535	12.6499	10.7987	11.7364	8.61492	6.83633	8.57331	10.8647	10.5582	10.3058	7.33723	6.48787	3.4889	6.84142	6.97397	3.55254	9.90888	6.36311	3.51393	5.70544	5.88551	5.89572	9.28255	8.76655	7.19976	9.44918	7.59053	6.11166	6.22131	8.09172	7.3876	6.35166	6.30661	7.60769	6.71247
Seita.1G055000	10.3869	11.6541	10.4023	11.0482	9.7259	9.33722	10.3582	8.11907	7.392	12.8535	13.1282	11.3502	14.5694	13.4248	12.602	9.36792	9.1372	8.7478	11.4653	10.5534	10.3466	10.4629	12.3799	11.6942	9.42558	9.49184	8.85864	13.005	13.1563	9.11167	9.8461	9.99123	9.85535	7.32338	6.67491	7.70615	7.62819	9.11514	9.41803	6.42655	8.62997	7.9944	4.57054	6.07644	5.58145	9.7095	8.13774	9.52358	12.9684
Seita.1G055100	0	0	0	0	0	0	0	0	0	0	0.034448	0.146225	0	0	0	0	0	0	0	0.109099	0	0	0	0	0	0	0	0.277139	0.125847	0	0	0	0	0	0	0	0.090608	0	0.079731	0	0	0	0	0	0	0.101994	0.096143	0.103529	0
Seita.1G055200	18.6953	20.162	15.6987	18.2703	18.3199	17.7463	19.4309	18.1034	28.7245	9.2099	8.05862	16.2494	16.3765	13.9268	14.6751	30.5054	23.9817	28.5793	8.07414	8.57759	8.07046	15.5619	15.1174	16.1684	17.4059	16.4049	27.8771	7.28521	6.95189	9.71416	2.38185	4.82467	13.4579	18.5455	24.9972	20.5121	6.67298	7.40892	6.42549	5.59599	8.09257	7.15253	23.6805	22.2876	22.5259	15.1491	13.0421	10.0748	19.7842
Seita.1G055300	7.59585	11.5934	7.30133	8.30398	8.07668	5.61822	1.44634	1.31692	0.711451	3.65144	5.05026	3.32844	3.80628	3.48273	3.92197	2.30655	2.23935	1.79787	5.36278	6.0509	4.02468	6.42501	6.46488	2.57916	0.849043	2.46163	1.82525	2.76154	2.10098	1.97549	6.20357	2.93494	4.57967	0.931377	0.749474	1.54102	3.20271	3.54589	3.68173	2.99757	2.45696	3.05256	0.787754	0.990874	1.29364	8.95312	8.81936	7.19473	33.6909
Seita.1G055400	6.16204	6.30732	6.58522	7.91708	6.95817	8.3365	9.48856	8.36982	5.04272	10.9119	9.86308	7.26419	7.62802	6.06848	6.32968	12.6779	11.019	10.7532	9.08712	10.7556	9.00205	9.21238	10.5667	8.3825	12.468	11.6389	6.91388	9.00647	8.74478	5.98072	14.1923	8.14127	8.02803	9.99832	12.3135	8.71517	11.1301	11.8022	9.85434	10.4666	8.7311	7.81992	6.68393	8.41737	7.28468	9.0313	8.20524	7.72578	7.10692
Seita.1G055500	6.22549	6.66428	15.4633	3.22299	6.16672	3.09308	3.06224	1.99192	5.19159	13.5417	11.0381	16.8218	9.65236	12.9557	14.3252	4.88071	4.20793	3.6033	14.6373	16.2786	16.8621	12.2566	21.4894	13.3885	4.79962	6.88668	3.26232	14.0369	11.8733	14.6084	1.7942	6.18457	3.55818	1.23533	1.43872	1.2182	9.45207	14.1306	12.1537	5.67998	5.41416	4.68212	2.38781	2.21344	2.27889	15.8996	15.6972	14.6298	3.89568
Seita.1G055600	0	0	0	0	0	0	0	0	0	0	0	0.064899	0.049379	0	0.011283	0.26902	0	0	0.307965	0.01108	0.177177	0	0	0	0	0	0.023687	0.390211	0.466705	0.197328	0	0.033372	0	0.013801	0.15469	0.009399	0.372545	0.905735	0.585343	0.022739	0.149186	0	0.307699	0.626702	0.35522	0.193594	0.47793	0.242318	0.077087
Seita.1G055700	0	0	0	0.011583	0.011413	0.022092	0.328489	0.440586	0.525676	11.2303	11.9703	9.9331	0.236214	0.546717	1.03075	0	0	0	1.38197	1.42512	1.02878	0.048382	0.035501	0	0.162744	0.302186	0.201829	18.5357	16.4235	9.12359	0.853264	1.41759	2.7993	0	0	0	1.44959	1.21553	1.31036	0.024788	0.01347	0.023929	0	0	0	1.95386	2.12221	1.32103	0.022234
Seita.1G055800	0.3168	0	0	0.519029	0.232235	0.375431	0	0	0	0	0	0	0	0	0	0.355481	0.070655	0.271402	0	0	0	0	0.058444	0.141004	0	0	0	0	0	0	0	0	0	0.042844	0.070208	0.018598	0	0.064645	0	0	0	0	0.098376	0.058532	0	0.134217	0.187166	0.072108	0.067773
Seita.1G055900	13.2409	12.9417	14.4911	9.74426	14.7475	13.9871	32.6304	28.6459	31.6615	32.59	34.4816	29.2975	29.4485	40.5735	35.8733	32.0523	30.7334	45.2552	20.1092	21.9102	24.9383	45.0482	42.3121	44.4704	22.4082	24.9761	29.0668	38.2266	37.1522	24.0832	20.0598	37.7768	40.2833	30.0573	30.8927	29.447	28.5253	29.9184	26.1177	37.9452	54.7613	49.2508	13.5818	14.8761	11.7447	9.08988	10.5798	9.80676	15.7442
Seita.1G056000	26.9369	34.5756	10.2575	6.2168	15.6673	5.16522	1.52283	0.776937	1.04499	33.5288	22.514	35.9775	34.4129	65.0443	43.0885	0.073555	0.271285	0.512327	35.4633	56.1826	54.858	20.3781	13.6888	12.6826	1.43591	1.72117	2.00362	14.8717	16.2899	52.845	10.4552	20.3701	21.484	0.349002	0.295411	0.281971	7.37398	10.3654	7.91684	14.892	24.2266	29.3012	0.320168	0.508217	0.170876	48.7017	54.7991	51.6609	75.3696
Seita.1G056100	0	0	0	0	0	0	0	0	0	0	0	0	0	0	0	0	0	0	0	0	0	0	0	0	0	0	0	0	0	0	0	0	0	0	0	0	0	0	0	0.041256	0.006075	0	0	0	0	0	0	0	0.147769
Seita.1G056200	0.599854	2.58154	0.457741	0	1.32503	0.02488	0.083872	0.189723	0.091602	0	0	0	0.302554	0.405907	0.748519	0	0	0	0.090621	0.067203	0.031947	0.911787	0.627583	0.441447	0.091736	0.47853	0.394665	0	0.036764	0	0.829131	0.679556	0.431931	0.233955	0.534766	0.258395	0.068221	0	0.063345	0.460285	0.376127	0.387631	0.086846	0.024366	0	0	0.121672	0.024364	4.0137
Seita.1G056300	0.076163	0.3722	0	0	0.110857	0	0	0	0.02522	1.21862	1.08734	1.50856	0.239898	0.430157	0.290003	0	0	0.033387	1.74968	1.25612	0.967324	0	0	0.034782	0	0	0	0.070712	0.145221	0.070859	0.030365	0	0	0	0	0	0.30483	0.286927	0.150128	0.18119	0.032819	0.029152	0	0	0	2.49962	2.65034	1.04629	0.029938
Seita.1G056500	6.93112	6.06582	7.28014	8.91787	8.19213	9.11783	7.63624	7.40065	4.70218	8.69647	9.82395	5.1747	7.06876	6.57629	5.3501	10.5755	8.91372	7.76931	8.47174	8.59374	7.04989	9.20884	9.4155	7.13169	7.77177	8.41769	4.59918	7.91497	9.02832	4.30021	6.3996	7.6613	4.29127	6.95173	6.36122	7.96266	7.17743	8.03604	7.56585	5.85705	6.42795	5.2804	6.05192	7.05275	6.31216	6.04334	7.24048	7.13224	9.09444
Seita.1G056600	0	0	0	0	0	0	0	0	0	0	0	0	0	0	0	0	0	0	0	0	0	0	0	0	0	0	0	0	0	0	0	0	0	0	0	0	0	0	0	0	0	0	0.517226	0.383834	0.012405	0.564975	0.263066	0.174179	0.642443
Seita.1G056700	44.0455	48.152	31.6753	43.9148	42.1696	47.1524	109.255	113.982	63.4948	0.171072	0.134049	0.121388	32.5657	28.4019	28.2454	188.072	169.203	161.563	0.319671	0.237062	0.169041	20.8767	19.8193	28.7055	111.437	121.782	68.9807	0.066111	0.226281	0.260589	16.3315	15.8387	23.7029	72.9881	87.4876	74.4604	0.478301	0.118674	0.18472	13.3843	37.6524	26.8051	158.046	160.237	145.762	0.046865	0.300358	0.128917	38.5165
Seita.1G056800	0	0.107959	0.222162	0	0.119432	0	0	0	0.063013	0	0	0	0.473304	0	0.171038	0.134001	0.035989	0	0	0	0	0.45423	0.023815	0	0.223851	0.267812	0	0	0	0	0	0	0	0	0.158875	0.197614	0	0	0	0	0	0	0	0	0	0	0	0	0.85967
Seita.1G056900	2.13929	3.94116	6.82051	3.41832	3.60937	3.61156	1.53378	1.2352	1.42315	5.98983	6.37557	5.47176	7.00465	3.63979	3.77244	2.42056	2.28195	2.4279	5.16082	4.92669	4.868	7.26165	6.41965	4.4417	1.28308	1.26841	1.69178	4.32498	4.84567	3.81317	3.22381	4.37701	5.01837	2.24495	1.95919	1.78693	4.35593	3.75986	4.50564	3.32537	2.44473	3.16382	1.58381	1.41869	1.59572	5.40545	4.83407	5.261	2.35594
Seita.1G057000	1.1863	1.19348	0.288883	0	0.73668	0.073865	0	0	0	0.734627	0.845085	0.700741	0.51646	0.799729	0.390253	0	0	0	1.7691	0.470136	1.76056	0.485971	0.422706	0.623549	0	0.116081	0	1.04919	0.964745	0.380945	0.088621	0.363108	0	0	0	0	1.02948	1.23855	1.77016	0.161899	0.439132	0.259615	0	0	0	0.660793	1.54752	0.61562	0.322612
Seita.1G057100	4.07493	3.27453	3.77815	4.35681	7.59309	5.88833	3.01118	2.92313	3.99641	73.3583	40.3752	121.648	1.56237	1.35214	2.99236	2.44267	3.7686	3.70984	70.8859	88.3172	83.861	0.077584	0.570022	2.09974	0.748143	1.37997	2.46701	50.0769	35.0869	176.945	1.03801	0.257218	1.84466	14.7786	20.5217	11.4231	165.262	165.331	179.144	0.617786	3.16443	1.21195	3.10497	1.7547	0.579023	77.7581	79.039	66.2516	0.53118
Seita.1G057200	1.52013	1.34754	2.27427	2.294	1.45153	1.54547	3.32415	3.29203	3.6252	2.61884	4.09961	3.13107	1.22699	2.7188	5.55029	2.31742	1.71027	2.70303	4.82805	3.02547	2.96043	3.0153	2.96547	1.67351	2.03112	2.31403	5.35468	7.64299	6.79635	5.73597	11.2783	6.09626	7.31064	4.04097	3.85054	5.64568	4.71666	5.41392	6.54107	7.17405	4.76868	5.05832	1.66362	1.37248	1.25404	1.45692	1.48593	1.30545	2.64397
Seita.1G057300	438.638	345.96	267.004	194.968	352.266	200.83	16.2937	17.5013	14.8522	485.605	361.901	604.803	276.794	642.654	387.012	10.1261	7.70244	13.1664	42.8889	40.3698	37.2752	46.4612	44.4644	70.2591	42.3016	50.9254	38.5466	601.882	373.263	505.284	71.4531	440.121	338.044	10.6676	10.7584	9.81477	44.8112	49.77	42.5161	65.2316	67.492	56.8346	8.3172	9.01454	6.44068	540.902	534.055	547.66	162.313
Seita.1G057400	0	0	0	0	0	0	0.545549	1.11965	0.716779	43.4282	22.2138	50.2762	22.564	33.2291	24.9747	0.515542	0.861127	1.89924	16.2796	25.7446	25.1131	80.5225	57.3627	3.59193	2.04745	1.95392	3.90908	21.1185	23.5115	122.174	11.3327	6.84337	26.7377	2.51305	0.684574	1.0393	18.9845	22.032	19.5048	11.3055	12.6726	24.1955	0	0	0	0	0	0	0
Seita.1G057500	57.906	62.3056	46.241	61.4172	60.381	66.1045	127.858	119.774	112.103	23.8926	25.2834	20.1347	39.4065	32.9274	43.316	102.34	110.557	113.602	21.6069	20.9174	21.6371	48.69	42.8342	44.6472	86.7448	88.5855	88.262	23.4753	24.7857	15.1764	33.3357	35.5448	48.1975	75.4094	89.6049	86.9513	17.719	20.3396	18.9258	29.9572	52.9849	41.4524	169.181	141.443	155.284	20.6279	22.0795	20.0562	58.5954
Seita.1G057600	13.5692	12.3384	15.6772	18.4881	18.8474	20.1474	14.4823	17.4581	11.9155	20.1497	19.633	17.6617	18.8199	12.8553	13.9968	19.0861	17.9173	18.6492	20.4461	19.5806	17.0442	20.9143	18.1027	15.5433	26.8727	27.3875	18.7603	25.7726	24.7526	19.8945	25.6159	21.2727	17.3876	21.5468	23.8875	20.4399	22.3852	25.6222	25.7421	20.2995	19.0414	16.8272	15.6732	18.1333	14.7169	17.3842	18.4574	20.5929	16.629
Seita.1G057700	0.055554	0.039676	0.067568	0.055427	0	0.116641	0.070544	0.13143	0.083089	0.119294	0.092074	0.043592	0.046729	0.157873	0	0.036616	0.025146	0.146889	0	0.115845	0.043771	0.265593	0.074087	0.123329	0.46937	0.338024	0.333155	0.37042	0.34385	0.234748	0.083866	0.188949	0.069936	0.143919	0.351687	0.144135	0.291298	0.363172	0.148788	0.097847	0.047961	0.171239	0.050729	0.063766	0.023973	0.089965	0.066097	0.025766	0.111696
Seita.1G057800	0	0	0	0	0	0	0	0	0	0	0	0	0	0	0	0	0	0	0	0	0	0	0	0	0	0	0	0	0	0	0	0	0	0	0	0	0	0	0	0	0	0	0	0	0	0	0	0	0
Seita.1G057900	2.01812	3.15238	2.2856	3.25244	3.38031	4.48312	1.55266	1.31916	1.33855	7.88024	6.76729	5.88893	0.617367	1.14153	3.57182	1.47791	1.79303	1.60838	8.82512	9.36559	7.65854	5.24121	4.65791	1.67109	1.74461	2.5012	3.22505	6.35372	5.56269	5.69889	5.56477	3.7672	6.37867	1.60255	1.77221	1.59777	4.07591	4.30761	3.69419	4.05133	4.29	3.55968	1.96027	1.69543	1.05227	12.6809	9.07479	9.29851	6.3691
Seita.1G058000	1.34613	1.8527	1.80328	1.62959	2.82875	1.99317	4.87006	4.99568	3.2244	0.150058	0.021387	0.125306	0.823707	0.680145	1.46301	5.59523	6.46387	5.34643	0.061203	0	0.022289	2.75817	1.46917	1.27394	9.88251	8.13412	6.1605	0.210394	0.215394	0.033738	1.20892	1.07192	0.826225	3.68988	4.7611	3.89628	0.11442	0.037868	0.157697	0.504739	1.0507	0.610021	10.639	9.1238	10.1145	0.029909	0.041115	0.191987	3.35902
Seita.1G058100	4.15646	3.43761	4.80173	4.65161	4.94988	4.49036	3.47133	2.58226	3.54108	2.56851	2.8004	2.93761	1.99038	2.3711	3.92349	3.22064	2.81718	3.17422	2.4862	2.5353	2.50262	4.18714	3.79918	3.17495	3.4445	2.91819	3.40263	3.1148	4.07326	3.81866	4.10802	3.58239	3.0888	2.86245	3.53281	3.20591	3.11017	2.94802	2.54929	2.82428	2.66421	3.09171	3.19797	2.58152	2.91131	2.38479	2.12165	1.9182	4.90367
Seita.1G058200	10.0429	11.7595	13.6977	4.48323	8.67214	4.97473	5.16086	3.93546	4.41814	4.25406	3.63232	4.84515	4.03825	3.21751	15.3715	8.61223	7.16575	8.48032	5.03393	6.83077	6.56931	3.43996	4.54477	3.88339	1.65599	2.54544	2.57484	2.69584	2.2166	2.67998	1.78084	1.29804	4.76963	3.96717	3.75911	4.51913	3.04566	3.38875	3.41473	1.94847	3.47408	3.65132	2.7946	43.6899	3.72766	8.33358	7.12721	7.74679	18.7626
Seita.1G058300	59.0812	65.7008	70.6553	48.6448	47.4628	52.5801	152.477	138.287	131.335	10.7131	10.815	13.5772	33.2136	33.3798	33.4917	155.345	138.128	145.616	14.4235	11.182	9.40057	45.2038	48.584	41.9228	97.2953	90.7063	75.6481	15.5399	16.536	14.0272	13.5013	32.6324	43.544	93.1822	94.9561	100.647	16.3042	16.2276	18.189	43.489	62.9142	63.8067	116.759	10.9014	125.316	4.44999	5.64845	4.18706	15.8453
Seita.1G058400	0	0.04859	0.043551	0	0	0	0	0	0	0	0	0	0	0	0	0	0.269439	0	0	0	0	0	0	0	0	0	0	0	0	0.353816	0	0	0	0	0	0	0	0	0	0	0	0	0.025051	0.079205	0.029768	0.62724	0.499123	0.519528	0
Seita.1G058500	0.316301	0.193839	0.281217	0.232769	0.660031	0.239069	2.24876	1.41944	1.98267	2.25365	1.86322	2.42567	0.084788	0.204341	0.106898	3.69389	2.73361	2.50821	1.66206	1.47218	1.91852	0.160714	0.16406	0.93038	2.56508	1.48341	2.2876	1.46064	1.7251	1.6785	0.02913	0.068204	0.091879	2.7402	2.35832	2.40261	1.21337	1.8944	1.91935	0.237568	0.303755	0.422828	2.4537	3.12368	1.69281	2.33942	1.83405	1.657	0.189644
Seita.1G058600	6.6114	8.66719	9.1367	17.755	9.7565	16.9016	13.0256	12.2079	9.49507	14.9313	13.3337	10.6723	7.29716	5.80968	7.60417	17.2683	16.6123	16.1146	20.0858	15.8286	16.3502	18.7861	17.6605	11.4776	23.2065	20.3298	12.8817	16.7733	16.5009	10.4521	24.8947	17.4798	11.6122	21.8404	23.2338	19.7308	15.0499	15.6684	14.8158	18.2497	18.7766	15.1968	8.34719	8.33499	7.50805	11.621	12.7316	13.2021	19.7998
Seita.1G058700	25.3452	23.9399	27.2121	24.3378	24.4067	20.0749	2.91797	1.60887	1.87256	24.7106	15.8231	27.1743	13.8796	15.8728	31.587	4.09324	4.76306	4.35511	27.6745	25.5427	26.273	14.9985	19.3898	28.5404	1.47974	1.53555	1.83196	6.86007	5.78174	5.29365	11.2769	14.2811	9.1872	1.34949	2.05604	2.06948	7.80873	11.4471	7.60844	10.1847	25.9384	18.9075	2.81974	3.03086	2.78025	22.5733	23.4227	22.2692	12.012
Seita.1G058800	1.89035	1.9049	2.03712	10.3235	10.5039	9.78295	4.19397	4.81265	8.62671	56.3721	48.6957	107.451	3.55306	5.48588	6.00689	8.72648	6.26628	7.55777	35.6094	40.8282	39.8488	4.72676	5.65332	7.83312	7.91068	8.34695	13.2424	83.1994	92.4962	122.821	47.1156	20.6029	13.8043	9.22273	8.70682	6.30244	47.2418	64.0283	53.9377	25.0338	15.1612	10.3323	5.22094	4.84937	5.03702	47.3607	41.2185	44.4237	1.96617
Seita.1G058900	4.49182	3.91441	4.56919	6.60421	5.35654	5.6486	3.88498	3.39799	3.11787	2.3874	2.65334	1.73585	2.86237	3.75557	3.7734	4.85137	5.12993	4.91489	2.59119	2.28024	1.83929	2.97856	3.39331	4.12914	3.57632	3.95735	4.51107	2.73625	2.44248	1.47703	1.06621	2.2618	3.33747	5.71047	6.07184	5.80261	2.3608	2.47906	2.70567	2.27579	4.07426	3.18093	4.81251	4.10514	4.90834	2.04081	1.74964	1.91074	3.70198
Seita.1G059100	0	0	0	0	0	0	0	0	0	0.117612	0.04253	0	0	0	0	0	0	0	0.040299	0	0.035755	0	0	0	0	0	0	0	0	0	0	0	0	0	0	0	0	0	0	0	0	0	0	0	0	0.284568	0.366325	0.118641	0
Seita.1G059200	0.057599	0.196858	0.749593	0	0.154684	0	0	0	0	4.26032	1.8952	5.82347	0	0.028852	0.513225	0	0	0	4.57653	5.64201	5.24923	1.41323	1.4135	0	0	0	0	0.089826	0.167849	0.273816	0.244596	1.13342	0.222518	0	0.028648	0	0.209865	0.293419	0.207483	0.32972	0	0.162168	0	0	0	9.37497	9.21809	6.88292	0.417453
Seita.1G059300	0	0	0	0	0	0	0	0	0	8.34039	4.16622	13.2198	0	0	0	0	0	0	8.54822	10.754	10.4701	0.037833	0	0	0	0	0.081987	0	0.052143	0.587492	0.030579	0	0	0	0	0	0.329141	0.067629	0.45789	0	0	0	0	0	0.034653	19.5469	18.3095	12.5945	0
Seita.1G059400	6.97709	7.00579	8.94257	9.41385	8.52432	7.38759	5.68482	5.14649	7.21067	5.93429	5.45942	6.82276	6.38284	4.18644	6.2539	5.47911	6.66148	6.86533	6.6752	6.35953	5.08505	5.66309	5.66948	4.81194	4.65266	5.30787	7.6567	4.9913	5.79286	6.43479	7.91093	4.64126	6.34018	7.37605	7.56992	8.67678	7.28812	7.38409	7.1294	5.03599	6.22687	5.98391	6.28101	5.4015	6.30757	8.23678	6.09443	6.84806	7.06512
Seita.1G059500	0	0	0	0	0	0	0	0	0	0.102879	0.171494	0.206413	0	0	0	0	0	0	0.182919	0.499088	0.092254	0	0	0	0	0	0	0.150641	0.017656	0.037498	0	0	0	0	0	0	0.05133	0.201386	0.047615	0	0	0	0	0	0	0.355914	0.573897	0.10894	0
Seita.1G059600	0.76629	1.81508	0.326115	0	1.0511	0	0	0	0	1.07842	0.407695	0.696428	0.509157	2.25188	1.27788	0	0.029922	0	0.71607	1.42785	1.00839	0.788674	0.795671	0.060741	0	0	0	0.391821	0.651359	0.766164	0.330681	0.256107	0.488403	0	0.027345	0	0.843539	1.64263	0.964457	0.461264	0.201271	0.50013	0	0	0.028924	2.38625	3.14798	1.79184	1.79209
Seita.1G059700	0	0	0	0	0	0	0.073316	0	0	0	0	0	0	0	0	0	0	0	0	0	0	0	0	0	0	0	0	0	0	0	0	0	0	0	0	0	0	0	0	0	0	0	0	0	0	0	0	0	0
Seita.1G059800	7.27443	6.81258	8.94913	7.26295	7.69252	6.50619	2.26737	1.85591	2.25068	5.15509	3.03471	4.31085	5.00312	2.26306	5.5295	3.01097	2.98496	3.75702	9.12854	6.43516	4.77648	8.58056	4.34513	5.0385	1.41188	1.71965	3.74088	5.6999	5.32104	5.90698	4.29898	3.86042	4.62599	5.2425	4.63499	5.17895	6.96333	7.6002	5.59676	4.98083	5.94665	6.14189	4.1532	4.27422	3.29628	7.29461	6.21562	5.25345	4.28052
Seita.1G059900	28.7744	36.9852	37.3628	49.5457	36.4826	46.3309	31.4131	27.9264	21.2435	39.2874	38.0816	24.501	39.9002	24.6351	24.2651	41.0764	33.7477	35.4865	35.4198	31.1889	34.7758	35.2161	34.3604	35.0522	62.5101	52.2027	36.7656	40.2469	46.8207	29.3811	28.7723	28.844	22.1208	46.1628	46.1609	45.0941	38.4956	36.0958	42.2575	24.8847	34.1659	26.8736	20.3445	24.0121	23.3607	27.0356	28.9513	26.8527	44.7372
Seita.1G060000	36.0549	34.7241	38.4816	160.645	131.097	172.795	95.5739	103.348	88.7721	24.7412	28.4303	22.238	24.6943	22.3543	35.5387	110.521	111.913	108.125	26.1723	21.2582	21.101	35.9308	42.7268	34.346	45.5548	52.0814	45.0923	37.8952	41.4623	23.5737	34.0996	54.3483	68.2577	38.2794	39.3699	39.3402	33.588	34.828	30.4481	45.7989	40.0497	47.9342	187.794	136.471	148.138	21.6968	17.8308	26.1081	21.2871
Seita.1G060100	0	0.488069	0.697433	0.422261	0.812663	2.0499	7.5681	7.73188	4.6823	0.364538	0.890797	0.070717	0.347466	0.296541	0.778709	12.3603	11.1649	8.37701	0.223477	0.63668	0.196081	0.563496	0.429612	0.247122	1.68338	1.95306	1.69647	0.516239	0.550119	0.357956	0.071547	0.586024	0.75874	1.2783	1.61787	2.42078	0.350495	0.345678	0.21044	0.421614	0.710718	0.25278	7.93864	7.4426	8.16951	0.124053	0.175146	0.100137	1.63627
Seita.1G060200	12.7429	14.0272	13.6732	45.3312	29.4786	43.7493	11.6665	12.2608	12.5496	18.1801	17.5235	16.0555	13.2166	11.2386	16.6467	14.5898	14.0641	13.5454	19.0157	17.7023	16.5967	16.3666	17.313	11.6989	11.9403	11.8482	12.3247	15.3537	15.8615	11.6843	19.324	22.9469	18.9181	13.9592	13.4158	14.7337	16.3741	18.6144	18.1385	21.5104	22.0335	26.0767	12.9601	13.8729	15.7753	19.8606	18.3176	19.0891	17.985
Seita.1G060300	28.8667	26.5325	30.0474	41.1127	52.4934	42.5605	24.3764	25.4784	10.7567	31.6352	35.4589	33.1083	19.5584	25.5578	17.8516	28.7642	25.3009	26.0401	27.0358	23.9714	24.1107	48.8958	37.5394	22.9702	28.7204	36.8961	39.1143	27.6231	35.1419	16.3639	74.6581	55.0174	61.8355	41.1	40.1831	40.085	23.0725	54.2507	49.8776	61.5928	25.7858	57.4593	16.7698	19.8726	20.0013	24.3361	24.2015	25.4009	27.6455
Seita.1G060400	1.03652	1.1484	1.06941	0.597796	1.93889	0.607882	3.60454	3.40724	3.24411	0.36369	0.684916	0.063629	0.305341	0.232559	0.546145	11.2429	8.60304	10.6709	2.66592	2.43666	2.53126	13.9712	16.3493	11.6915	1.36113	1.55061	1.3598	0.586691	1.03214	0.202135	8.6727	1.57091	0.612911	10.8792	6.29681	9.26919	4.51532	6.3571	2.66091	29.5496	14.9631	23.1983	0.258822	0.266163	0.62998	0.171596	0.16842	0.226796	0.663117
Seita.1G060500	0.671785	0.872145	0.879302	3.67734	4.08111	6.12453	20.0711	13.983	11.2088	81.3191	83.5256	60.551	1.20386	1.86978	0.461333	26.3916	28.9485	20.4528	115.945	120.601	96.3325	2.75575	2.61034	2.83499	29.1726	25.8487	18.554	37.8892	43.4947	47.4014	1.66527	2.36348	3.12054	32.9259	31.4984	36.7301	54.8438	57.04	61.7859	7.15541	5.03979	9.4276	9.73588	15.0614	10.191	118.904	127.043	152.676	4.6589
Seita.1G060600	22.4796	22.7303	26.7491	20.3103	23.7067	20.107	48.808	47.5294	46.1504	37.1529	47.2259	37.1936	38.8192	31.4227	28.1046	48.9881	51.5574	44.19	36.4912	33.7027	29.6117	34.2215	34.0779	32.1945	50.1352	49.6863	45.2924	41.0736	40.5837	26.307	32.5776	23.924	22.6135	45.4803	51.7077	48.0577	35.1658	35.7011	36.4826	26.0609	24.2409	24.5478	38.1553	36.9016	37.2347	29.3642	29.119	31.4023	18.5217
Seita.1G060700	3.76072	4.62657	3.07703	2.67705	3.92298	2.26754	9.42802	5.79682	9.26463	11.2733	13.9178	10.7551	4.02248	7.88115	5.16258	9.6642	8.00602	8.78591	14.5682	15.0228	14.9611	5.26165	6.49933	5.55893	6.87422	7.27701	12.2236	15.8236	15.866	22.0387	4.48523	3.31733	3.91239	13.8759	13.5913	13.4894	14.4691	13.3633	13.8909	3.2402	4.72268	6.26212	5.81577	6.38592	3.61703	8.86021	10.3825	8.79651	6.32355
Seita.1G060800	6.66879	5.65329	5.02201	2.24967	3.80009	1.93321	3.08944	2.17294	2.12731	2.6804	1.79028	3.65619	1.69873	2.89706	3.96806	2.40978	3.66624	2.56121	3.30617	4.09732	3.26236	4.04406	4.75854	4.12851	0.364755	0.921264	1.27969	0.453245	0.341394	0.471354	1.63282	0.518728	1.57639	0.793847	1.04678	0.450246	1.02386	1.07873	0.886203	0.789915	1.45103	1.22016	3.03122	2.21121	2.53284	3.96919	4.09319	4.02939	2.94103
Seita.1G060900	19.3517	22.7843	22.2943	28.0054	21.2006	28.5715	15.2797	17.1068	11.1955	27.0158	31.7933	22.045	21.2152	21.8795	20.5034	17.8485	18.221	16.2918	27.0307	26.7581	21.7139	35.703	31.7258	25.8996	29.0082	26.4638	16.8442	24.0216	27.1108	14.7658	34.2322	36.3349	23.8905	21.3119	23.2602	19.6896	26.5024	26.5465	25.88	31.4355	20.5565	21.3731	11.5083	16.4133	13.3519	23.1294	24.3919	23.6443	28.0219
Seita.1G061000	0	0	0	0.167713	0	0	0	0	0	13.3854	14.1943	10.1093	0	0	0	0	0	0	13.5634	11.7369	10.1522	0	0	0	0	0	0	2.18365	2.42374	1.60277	0	0	0	0	0	0	8.10742	7.14612	9.79111	0.080982	0	0	0	0	0	12.6451	10.3121	14.5674	0
Seita.1G061100	2.21141	2.07154	2.88577	5.14058	5.30134	4.60819	3.49674	2.76476	1.45	7.49933	10.4507	2.92149	0.072298	2.18839	0.578463	6.37296	4.88797	6.3372	7.69009	9.82973	8.00029	8.09945	7.32936	3.22255	8.0614	5.28611	3.5803	10.1247	15.9708	12.6412	2.928	4.82115	5.93791	6.84611	9.93035	7.59227	14.6384	13.1283	17.0189	4.70573	4.77824	6.56155	5.07115	5.76523	6.3086	3.6189	3.51542	5.56672	2.9455
Seita.1G061200	9.20089	8.8586	11.1838	10.6097	9.68984	10.8208	5.76673	6.66502	7.0946	26.4294	28.8216	28.0395	13.9853	8.0821	6.55804	6.69036	6.91118	6.2241	32.1279	29.8494	28.4144	5.72913	9.07219	13.8202	8.03295	10.1554	10.0366	16.6787	17.3272	18.4438	2.21828	5.06874	7.09324	9.08726	7.85847	8.96831	22.0741	22.4135	24.524	4.5279	5.25875	4.45868	6.84916	5.23016	6.02411	26.4981	22.6588	22.8596	4.52115
Seita.1G061300	3.12919	2.97636	4.21568	3.66655	3.85885	3.69002	2.72891	2.7902	2.91164	4.48372	5.82914	4.22399	3.17307	2.41343	4.76104	2.92661	2.53802	2.46092	3.57586	2.73216	2.4935	4.38908	4.51542	2.40657	5.20444	6.41041	4.88651	4.91513	4.21252	3.40116	6.74741	3.64998	3.44778	5.96723	7.82513	7.32509	6.45088	6.1292	6.69541	4.08273	4.3469	4.91699	2.75618	2.18458	2.57341	4.03566	3.60392	3.5686	3.39709
Seita.1G061500	9.34918	12.3766	9.40408	14.1382	15.1286	17.7798	17.0674	15.6345	13.7196	7.75436	7.59619	6.61629	7.41033	7.8559	11.2535	21.7764	19.7881	14.5914	9.77463	7.99473	9.60144	9.25737	10.0091	9.28202	27.1174	15.7659	21.1078	7.07381	8.02536	5.69198	11.3349	11.7387	12.2958	27.8439	30.6964	28.4587	9.83027	8.38694	7.80574	10.4024	14.4464	14.9506	19.5634	18.6193	20.3652	7.51129	6.99098	7.88227	12.2022
Seita.1G061800	2.39701	2.77659	1.82648	2.52498	2.03598	2.51037	5.43276	4.35465	4.63971	0.040709	0.157734	0.041678	0.801651	1.88311	2.21684	4.41322	5.16341	6.25533	0.024467	0.034712	0.069186	2.48261	2.03928	0.430247	6.00033	7.50661	5.47838	0.260068	0.151594	0.078663	2.07051	0.545401	1.89923	3.24349	3.85643	3.76765	0.033526	0.082407	0.037173	0.489967	1.28831	1.22306	5.62301	5.5643	8.17003	0.027514	0.047043	0.036165	2.85206
Seita.1G061900	6.88039	8.68421	11.1012	10.8364	9.04451	8.87654	14.0509	13.8793	10.111	20.7115	23.4865	13.3574	19.5615	12.9244	13.0908	14.3333	13.1496	11.5697	15.2317	9.63528	9.94419	11.956	11.0841	12.0904	24.1471	20.8271	14.5135	21.5726	22.7307	15.6103	27.0197	15.4397	10.6272	21.73	22.9357	20.4366	23.9	24.9187	23.0913	20.1287	15.0161	13.577	10.4415	11.8242	11.896	14.7213	12.5237	13.3857	9.2002
Seita.1G062000	0.064939	0.247285	0.12701	0.260871	0.255	0.229338	0	0	0	0.967636	0	0.383197	0	0	0	0	0	0	1.12274	0.666545	0.620973	0	0	0	0	0	0	0	0	0	0	0	0	0	0	0	0	0	0	0	0	0.581499	0	0	0	3.28844	0.525208	0.111394	0
Seita.1G062100	0.585161	0.899184	0.849741	0.522573	5.28999	1.17298	14.5878	18.8546	21.2424	1038.28	961.704	1179.28	0.369852	53.6085	1.69446	33.7515	38.4777	32.8564	1305.47	1356.32	1429.22	1.84616	3.08286	4.36355	67.7646	47.9507	155.736	281.078	357.362	1075.05	2.10642	7.20079	29.8427	91.3326	60.1289	41.378	447.437	413.628	449.691	19.4435	2.77113	46.588	21.6885	15.3016	7.28205	1214.04	1101.91	1341.58	19.9072
Seita.1G062200	0	0.011478	0.062566	0.170291	0.111741	0.172936	0.146067	0.21187	0.12254	3.45273	3.04224	2.89928	0.027587	0	0.023927	0.967658	0.687089	0.728542	3.46626	3.46824	3.22582	0	0.024647	0.022449	0.096926	0.108508	0.060624	4.62101	6.02378	3.36509	2.22068	0.098099	0.03413	1.16798	1.12055	1.26532	4.01241	4.41113	4.73963	0.24991	0.032279	0.083863	0.357456	0.583503	0.495809	4.67221	4.38821	4.31564	0.120981
Seita.1G062300	0	0	0	0.024329	0.228673	0	0	0	0	0	0	0	0	0	0	0	0	0	0	0	0	0	0	0	0	0	0	0	0	0	0	0	0	0	0	0	0	0	0	0	0	0	0.019953	0.141981	0.125662	0.554452	0.926914	1.05633	0
Seita.1G062400	1.91337	2.15991	0.896027	1.35786	1.61526	1.35191	2.43005	2.6167	3.93205	9.73376	6.88033	10.7029	2.00833	5.4374	2.9703	3.00914	1.69383	1.88686	12.9142	14.4903	14.0666	2.49099	1.70809	2.68456	3.44178	1.81255	3.50402	5.39612	5.64035	6.35422	2.76891	4.38956	3.74711	6.64122	7.46675	4.79985	4.30743	4.77204	3.9255	2.9695	2.91004	6.66227	4.74552	1.97253	1.23851	11.4751	13.3314	11.5993	2.78398
Seita.1G062500	11.4391	15.1348	11.9876	10.0493	10.0917	12.1793	2.47804	3.2903	1.72348	16.6551	27.9761	13.3386	31.0168	25.6482	13.3776	1.46785	1.53396	1.19418	15.0804	14.4095	12.9628	21.6209	19.4975	17.4609	6.4945	5.74266	3.05116	24.4656	21.0294	10.3402	13.2863	22.647	12.6302	4.50381	4.09194	4.53441	12.5392	13.5615	12.6841	16.6513	12.3579	12.5022	2.28557	1.84729	1.58081	13.4715	15.0664	14.6511	22.6603
Seita.1G062600	0.020932	0.04296	0.05718	0	0	0.041055	0	0	0	3.71065	3.54826	9.38256	0.051543	0.05314	0.023173	0	0	0	0.686846	1.20607	1.29462	0.014761	0.023218	0	0	0	0	6.5145	8.01078	10.0908	0.066444	0.234795	0.082966	0	0.024882	0	3.99133	3.52406	3.0135	0.144882	0.078727	0.022998	0.95459	0.937684	0.860969	4.21431	3.80282	3.39711	1.86949
Seita.1G062700	26.7365	28.2778	22.9056	39.3488	33.6998	44.1336	89.2782	92.3337	55.0291	15.8009	15.5005	9.83057	30.4365	21.9234	20.0571	118.335	109.586	92.7309	17.1081	16.0197	17.0701	35.3113	29.6001	24.6524	99.0838	90.3086	54.4663	16.448	14.5815	8.46924	37.1016	34.0096	27.5553	78.3809	80.4241	76.4854	17.5483	15.1097	16.8444	25.7378	37.1991	30.0156	102.804	96.1518	100.233	13.0006	13.2622	14.2347	28.5134
Seita.1G062800	0	0	0.030193	0	0.050375	0	0	0	0	0	0	0	0.058076	0	0.064254	0	0	0	0	0	0	0.165381	0.227325	0	0	0	0	0.128746	0	0	0.083753	0.609167	0.313265	0	0	0	0	0	0	0.092883	0	0.040612	0	0	0	0	0	0	0
Seita.1G062900	0.275983	0.203462	0.280904	0.159323	0.335657	0.042248	0.01887	0	0.053707	0.420961	0.657627	0.862545	3.68242	9.73991	1.18741	0.051907	0	0	0.598808	0.293522	0.368213	2.89357	2.46922	1.0824	0.243069	0.15691	0.127944	0.327424	0.521687	4.40673	8.49641	11.7339	2.81419	0.041291	0.047454	0	0.519625	0.977131	0.728102	7.97078	1.00063	1.36744	0.081101	0.095449	0.050194	0.592774	1.26836	0.630676	5.96002
Seita.1G063000	0	0	0	0	0	0	0	0.138235	0	0	0	0	0	0	0	0	0	0	0	0	0	0	0	0	0	0	0.017129	0	0	0	0	0.112754	0.025578	0	0	0	0	0	0	0	0	0.088311	0	0	0	0	0	0	0
Seita.1G063200	36.9251	29.3271	36.3604	62.3056	45.1935	55.1433	17.6481	13.7604	17.5502	20.2433	27.4537	16.9075	43.1087	32.0927	31.8304	18.693	18.8571	16.0859	14.8699	12.7233	12.9959	20.9317	24.911	26.5939	16.3447	17.7392	11.7865	33.8407	36.958	15.337	49.5763	38.7113	30.7829	11.9615	11.4483	13.5398	20.5323	21.8334	18.2196	29.2778	28.8671	31.654	18.1277	18.8986	21.0944	16.3929	16.5535	17.1404	26.0972
Seita.1G063300	11.3122	12.2086	14.4015	19.7554	17.9305	17.1065	7.47068	8.89416	11.4267	8.48936	7.43273	9.0371	7.57541	5.67381	9.96565	8.54541	11.4261	9.77052	9.08027	9.62218	8.59852	13.0671	12.635	12.3593	10.0326	9.64094	11.9221	15.52	11.5027	8.69682	50.3928	14.5957	13.1122	13.6493	11.6162	14.5112	14.6295	14.8952	14.5833	15.3224	12.6357	14.2169	10.2966	9.04772	10.7878	9.77428	8.95176	8.56223	9.48512
Seita.1G063400	16.238	13.8513	15.6313	15.263	16.9835	12.5339	10.3724	8.36586	14.5728	14.1166	11.2198	14.8793	10.9017	11.034	17.1325	9.5966	10.1511	12.6439	11.3592	12.1713	12.3689	8.20857	10.9162	12.6864	6.71424	7.13342	12.1358	14.2219	13.362	14.9327	10.0105	9.99316	15.9977	10.8286	11.0929	10.9357	14.8149	14.5131	14.7555	9.40099	9.91091	11.8265	6.26625	6.01445	7.17607	7.89755	6.79329	7.87477	5.39931
Seita.1G063500	4.71147	4.04659	3.6136	24.1481	22.021	31.2061	1.56669	1.19062	2.80336	16.4449	13.2599	23.4464	4.93732	9.18487	10.6878	1.73839	1.28274	1.83998	4.85985	5.17015	5.69617	4.69259	12.2019	3.81298	29.8057	26.0094	42.7772	40.0654	40.15	88.9435	27.9796	59.927	65.0128	21.2584	18.3482	18.2034	50.1463	44.1293	42.9787	58.8261	25.2132	39.5134	1.38236	0.897781	1.00936	9.35754	15.2004	7.70649	3.35499
Seita.1G063600	6.01156	11.6013	10.3826	12.1006	18.938	18.5703	3.49338	4.50282	3.69868	16.4312	20.3427	21.4655	6.80702	8.27394	14.9527	4.53151	4.54719	4.15078	10.7423	10.9761	10.2837	23.8278	24.4986	7.41394	11.2782	11.7369	12.0775	20.3397	19.9724	21.809	14.4847	22.4241	30.0115	11.8312	10.825	11.7936	16.1995	17.5039	17.0409	18.6573	12.0428	17.28	3.05753	3.2521	2.51458	8.97467	9.12189	8.86881	36.8066
Seita.1G063700	0.160222	1.22599	0.135695	0.062218	0.205832	0.357593	0.19962	0.493238	0.131324	0.823581	0.910124	1.0065	1.85297	0.73263	0.39363	0.192929	0.036375	0.06921	0.855611	0.863437	0.604742	3.60956	2.48785	0.686847	0.78108	0.345447	0.323655	0.839575	0.514371	0.249764	3.27078	0.442712	0.463903	0.082543	0.303453	0.166137	0.202469	0.534937	0.125331	0.406304	0.289438	0.152107	0.14677	0.258477	0.137397	0.825288	1.23475	0.465981	1.17863
Seita.1G063800	5.05121	5.64604	6.59766	8.32462	7.83991	8.873	2.86562	2.11078	2.10988	3.73265	3.10942	3.04554	3.95309	3.14347	5.86892	1.90586	2.11305	2.08271	3.45435	3.3635	2.75715	11.6842	11.2366	6.1741	5.23736	5.63625	3.40472	5.23918	4.42868	2.30863	12.2981	7.80614	5.30881	2.7884	2.25913	3.20894	3.85421	3.92403	3.33831	8.46215	6.31569	6.6817	1.13969	1.33053	2.13485	3.01274	3.75994	2.63964	9.94596
Seita.1G063900	1.41901	0	0	1.9413	0.864896	3.28356	0	0	0	0	4.6783	0	0	0	0	0	0	0	0	50.1461	11.7776	0	0	0	0	0	0	0	0	0	0	0	0	0	0	0	0	0	0	0	0	0	0.052925	0.475668	0.882897	35.8723	46.7495	46.9703	0.114467
Seita.1G064000	7.77962	6.18352	7.24797	11.7754	3.43143	25.3057	1.26803	0.051204	1.51742	3.07581	1.09324	5.30787	0.823485	0.053511	3.23593	0.257571	0.028032	0.970504	0.728247	1.85417	1.56526	1.43424	0.779357	2.35902	0	0	0	0	0	0	0	0	0	0.031746	0	0.250103	0	0	0	0.013997	0.488305	0	0.0859	1.37976	3.455	1.93867	2.60355	3.44445	0.09568
Seita.1G064100	12.6159	15.669	11.2914	26.7094	16.2938	35.9488	61.09	71.4805	78.1616	78.4099	35.1935	133.263	8.75118	7.79028	17.6167	69.6506	50.3729	65.0325	62.5622	80.3118	101.836	4.31685	2.74804	11.8951	32.8171	48.1181	77.0856	12.0719	13.4314	16.9377	1.55021	4.9258	21.6522	51.171	53.0204	75.2065	4.0026	4.24358	2.2764	8.48228	25.2574	20.1401	54.115	70.6038	88.1346	117.013	115.302	106.448	3.58608
Seita.1G064200	10.0129	10.7379	11.1339	14.3511	13.1137	15.5421	23.0677	24.1993	21.27	6.99559	8.95853	7.30591	12.304	11.1538	12.6122	22.9538	21.8568	18.7501	6.6309	4.53065	4.65278	12.2968	13.1479	12.0633	34.1431	31.2282	27.4612	12.1755	11.6754	7.21206	25.2166	20.3635	15.224	22.463	25.451	20.6695	7.28824	8.02712	7.78951	15.3455	14.7128	11.7822	20.435	19.8686	21.5547	4.89324	5.48442	4.84115	12.1297
Seita.1G064300	0.065305	0.086094	0	0.100883	0.064133	0.253345	1.73182	1.82619	1.51449	0	0	0	0.109507	0	0.16657	1.41288	2.1062	1.17482	0	0	0.041331	0.046279	0.050151	0	3.0919	3.79	1.06288	0	0.023623	0	10.7096	0.125116	0.092741	1.47527	1.38482	1.28949	0	0	0	0.083263	0.025942	0.109039	1.63217	1.15761	1.20164	0.076523	0.075559	0.064504	0.020521
Seita.1G064400	3.36147	18.4845	4.45892	3.19944	2.43284	1.17216	155.097	92.9554	183.477	0.136814	0.074053	0.65047	1.7592	1.81573	5.56527	6.64615	20.9357	21.3691	0.208724	0.21977	0.214524	24.6929	16.8371	7.5335	1.98929	4.78329	11.2551	0.049409	0.050482	0.081213	23.4978	120.887	129.658	0.828141	0.86949	1.25304	0.232467	0.110275	0	50.0391	5.58024	4.64018	110.567	91.8666	69.774	0.200405	0.232536	0.426317	67.7508
Seita.1G064500	0.088278	0.432228	0.14662	0.57088	0.375238	0.584393	0.772142	0.305371	0.340443	0.150834	0.171798	0.09271	0.203468	0.189854	0.247278	0.264469	0.24584	0.143606	0	0.135792	0.040309	0.204216	0.041244	0.073477	0.349556	0.481825	0.281223	0.399391	0.257082	0.178662	0.552158	0.407746	0.68565	0.081304	0	0.095558	0.08853	0.155744	0.184598	0.256606	0.160732	0.020022	1.07225	0.95722	0.414591	0	0.179538	0.15483	0.231623
Seita.1G064600	0.215752	2.47695	0.099442	0	0	0	0	0	0	0.380879	0.549065	0.381725	0.088891	0.183595	0.464203	0	0	0	0.044784	0.475936	0.247593	0.861223	0.41214	0	0	0	0	0	0.19437	0	2.02972	0.551218	0.072163	0	0	0.021805	0	0.219756	0	0.062801	0.066886	0	0	0	0.045313	0.382897	0.780494	0.320221	11.0581
Seita.1G064700	0.463369	0.35897	0.276778	0.345199	0.236021	0.283748	5.35227	6.44207	8.79932	1.23047	0.983987	2.32765	2.42414	2.91571	1.44904	4.42902	4.61434	3.94755	1.04703	1.14074	1.2863	0.363287	0.116951	0.513534	3.79879	4.05772	6.15807	0.870965	0.795415	1.30595	0.236311	1.67702	1.38141	0.587838	0.741602	0.574784	0.145348	0.071867	0.147227	0.457653	0.162698	0.091356	3.88649	4.36487	4.36523	2.4882	2.29237	2.2308	0.170932
Seita.1G064800	4.23254	6.97274	4.80067	4.77166	6.19339	5.28783	6.6124	5.36259	12.7509	6.34384	4.24655	12.9056	3.14672	3.70531	8.9448	6.03436	5.80268	6.35901	5.41903	6.23759	5.45341	8.37392	9.37575	3.80953	5.4714	7.2422	15.7036	7.39271	6.84464	19.6856	12.8127	9.08845	12.1474	7.35326	6.68415	7.23163	7.43161	8.05563	7.82285	6.28884	5.99608	6.07249	4.60264	4.455	5.19647	6.39456	7.73256	6.74821	7.2075
Seita.1G064900	45.331	47.9397	38.9606	56.1012	37.3862	48.7294	35.2501	39.2765	22.5955	43.0564	52.8421	28.9989	58.1858	60.6734	39.589	33.3243	35.9877	29.8175	42.957	41.0177	37.2082	63.9243	57.7581	69.2409	68.6475	53.8608	29.811	50.8507	46.4284	28.9239	27.8533	38.1966	20.9102	37.7674	32.4632	32.9563	43.1074	33.0984	39.5855	29.4705	46.1378	35.5654	24.6165	29.9347	24.9472	37.9028	35.4998	36.5288	63.9511
Seita.1G065000	1.16565	1.06979	1.25997	1.13341	1.1177	1.38069	1.47715	1.55383	0.699763	1.73691	3.03008	2.3434	2.36326	1.79796	1.12358	1.84551	2.42421	0.817249	1.74565	1.55591	1.41715	1.78825	3.13673	1.96437	1.73895	1.78841	0.9898	2.09727	3.54233	1.85038	1.70247	1.7839	0.80387	1.3063	1.44811	0.87023	2.63104	1.80742	1.60262	1.52056	1.06452	1.97172	0.791159	1.01461	1.10236	2.19739	1.23376	2.32485	1.6995
Seita.1G065100	0	0	0	0.249706	0.093291	0.046147	0.284507	1.43889	0.354996	0	0	0	0	0	0	0.170092	0.21723	0.150043	0	0	0.050804	0	0	0.058347	0.358448	0.029009	0.047427	0	0	0	0	0.064815	0	0	0	0.053691	0.054245	0	0	0	0.164791	0.217616	0.366647	0.292035	0.299898	0	0	0	0.09708
Seita.1G065200	24.0077	35.1215	21.8333	4.94961	19.0428	5.69929	4.09384	7.46387	4.87558	1.23342	0.919446	0.735951	39.3592	30.054	26.2513	4.83209	2.91131	1.66974	0.161733	0.107088	0.244354	26.8496	19.1331	16.0658	1.37921	0.607703	0.434304	3.2129	2.30041	1.23203	7.85688	11.8742	10.0254	0.270196	0.166205	0.172161	0.889105	1.16322	0.532272	6.89242	4.68782	5.25483	0.846729	2.1635	1.27059	0.422502	0.248234	0.309139	16.9161
Seita.1G065300	0.074342	0.127062	0.159243	0	0.263939	0.157351	463.8	331.064	328.575	3.93503	3.32901	4.25322	0.301783	0.964355	0.604416	348.69	317.52	368.197	0.506851	1.85591	1.68525	0.490318	0.89051	0.442032	81.8384	98.7141	124.975	0.962266	1.39656	0.672423	1.68181	2.99282	2.20585	98.5389	98.8969	84.8777	1.62346	1.21087	0.415972	1.25409	0.249817	3.45695	187.361	228.657	163.84	0.93638	2.37051	0.461635	0.186213
Seita.1G065400	0.03179	0.036879	0.063839	0.027292	0.026721	0.012219	9.76596	9.02563	6.92543	0.010185	0.024412	0	0.033558	0.013089	0.118484	8.23568	12.7059	7.49228	0.03749	0	0.081761	0.017639	0.010817	0.05779	2.24976	2.18189	3.0095	0.035026	0.130157	0.036948	0.200826	0.089174	0.098913	2.26528	1.85454	3.20931	0.07506	0.087918	0.010766	0.029238	0.047615	0.049948	5.86072	6.70541	4.03775	0.432963	0.3646	0.419258	0.671147
Seita.1G065500	7.53679	7.01705	7.80741	10.9957	12.1615	11.0965	15.3669	12.2946	14.8766	6.54197	6.36052	6.17362	5.90841	4.82084	7.3617	16.7059	20.9522	17.9963	6.82557	6.10205	7.41072	5.44859	6.47472	7.11193	9.50605	10.8569	14.8062	7.2214	6.84214	5.95818	19.9644	16.7038	15.8262	13.182	12.5072	14.7243	10.4729	11.3099	9.56329	17.4288	8.55144	12.1499	18.8763	16.4134	23.3849	6.38194	5.92124	5.67853	5.66105
Seita.1G065600	44.436	42.4786	50.685	41.4753	47.2383	42.2528	66.1192	62.5272	61.2091	39.5778	38.9951	32.2758	46.5637	41.4	48.8411	55.9951	61.1611	53.9818	33.8074	30.9161	29.7678	42.5272	48.0183	42.464	58.4986	58.6236	52.9727	36.6822	40.0081	23.8755	64.8148	46.2826	37.5851	42.5688	44.0272	47.0618	30.9181	32.3074	32.0097	45.3673	43.3142	41.7993	47.0949	48.7038	55.4983	27.3859	28.1954	28.2247	29.1661
Seita.1G065700	0.203868	0.0633	0.297863	0.738083	0.537901	1.36893	21.6774	15.2362	13.3906	0.072732	0.085487	0.154311	0.075313	0.037055	0.034144	31.2707	29.5808	29.7534	0	0.037796	0.107803	0	0.203098	0.185713	8.95382	13.6521	13.6409	0	0	0.221738	0.038117	0.088319	0.203801	9.15464	9.225	9.51947	0.153473	0.018921	0.071251	0.42973	0.424184	0.237284	11.3544	12.4886	9.70181	0.050012	0.02739	0.082215	0.03564
Seita.1G065800	990.277	736.215	669.741	328.441	472.203	285.607	17.8776	16.0484	17.8562	572.76	345.746	767.374	451.146	1165.96	610.004	10.7864	11.1375	17.6214	433.369	521.867	571.32	269.8	292.442	937.986	47.8673	69.142	52.5026	409.257	218.49	443.665	74.0353	358.457	235.129	28.9891	28.9623	46.2721	380.004	480.164	380.603	329.998	646.116	418.472	17.9798	17.6132	10.3762	626.372	620.513	545.264	254.148
Seita.1G065900	24.0033	24.3988	28.6429	41.2455	33.3204	36.9389	27.5491	27.8496	16.3021	36.9709	43.1452	21.0051	32.8761	30.1265	18.6892	35.0496	35.1046	28.8418	38.332	34.7061	31.4064	45.4855	43.2109	41.2326	39.0678	34.9524	19.7602	37.0195	32.2007	16.2874	18.827	22.2488	10.7743	31.4964	29.6879	28.2563	27.2422	27.149	28.1809	17.364	25.8728	21.6535	24.2657	28.7801	22.0415	34.4018	30.6853	32.788	36.8765
Seita.1G066000	0	0.047904	0.1769	0.18738	0.202248	0.049403	0.525252	0.220564	0.301639	0.446946	0.417072	0.320852	0.253314	0.61	0.509461	0.174812	0.367043	0.516535	0.761537	0.406738	0.176765	0.262706	0.162073	0.249857	1.10365	0.707295	0.671409	0.540503	0.182559	1.41522	0.009089	0.069389	0.225171	0.452434	0.505162	0.088903	0.688362	0.269193	0.323532	0	0.00668	0.135422	0.299826	0.190002	0.105456	0.198589	0.406555	0.319805	0.106989
Seita.1G066100	0	0	0	0	0	0	0	0	0	0.018583	0	0.016614	0	0	0	0	0	0	0.040697	0.038112	0	0.063635	0.19227	0	0	0	0	0	0.044024	0.032592	0.098295	0	0	0.116605	0.074939	0	0	0	0	0	0	0	0	0	0	0.009978	0.040869	0.026514	0.123532
Seita.1G066200	0	0	0	0	0	0	0	0	0	0	0	0	0	0	0	0	0	0	0	0	0	0.022479	0	0	0	0	0	0	0	0	0	0	0	0	0	0	0	0	0	0	0	0	0	0	0	0	0	0	0
Seita.1G066300	0	0.099593	0.022168	0	0	0	0	0	0	0	0	0	0	0	0.119511	0	0	0	0	0	0	0.35818	1.12828	0	0	0	0	0	0	0.044143	40.2402	6.81302	0.387806	0	0	0	0.044269	0	0	3.21233	0	0	0.051346	0	0	0	0	0	11.426
Seita.1G066400	0.028193	0.057862	0.307369	0.577574	0.398513	0.686338	1.41961	1.01304	0.638782	0.858644	1.20837	0.469279	0.104308	0.107719	0.094845	1.45251	1.29801	1.22579	1.06796	0.887216	0.621913	0.119291	0.07818	0	1.21104	1.09259	1.64147	1.00357	1.43697	0.758827	0.107391	0.104766	0.409345	4.28257	4.58108	3.92509	1.40979	1.73632	1.89753	0.351242	0.142379	0.276621	0.697702	0.643402	0.761189	0.656045	0.346788	0.722797	0.030624
Seita.1G066500	37.8628	38.7259	44.0769	48.531	33.6951	42.802	29.4998	25.0972	26.1804	18.1997	20.7783	15.325	36.477	25.7192	38.4937	25.4398	26.3495	22.7085	16.537	14.9977	14.01	36.4414	39.1451	32.709	28.8261	28.9786	24.4148	20.6007	22.5501	13.9332	26.1998	21.0421	23.4443	29.8252	30.9945	34.6466	19.1794	18.4795	20.9809	18.4672	24.5774	23.8127	23.7462	22.3617	27.081	17.1294	16.5854	17.0246	41.4089
Seita.1G066600	14.5805	16.8687	19.5535	27.2676	22.3692	30.1604	11.7414	10.1146	13.7372	17.6427	17.3702	17.216	8.05529	5.39945	16.3212	16.8725	15.9328	20.9351	15.4279	15.7235	17.9688	14.796	16.2228	11.725	11.2072	14.7269	16.9792	21.3026	18.1492	18.7146	10.6709	20.4319	28.7397	18.1943	18.646	19.2748	21.5023	21.2774	20.8927	23.9649	22.2623	24.4323	13.3951	12.3285	13.4922	13.8143	14.1453	13.5916	17.2271
Seita.1G066700	15.0093	15.1332	17.427	28.2293	21.421	32.0627	13.6146	10.12	13.8627	21.048	18.0638	18.7272	7.48223	5.87874	16.3263	15.8308	16.8133	18.5606	18.0748	16.8053	20.1471	17.9549	17.6704	12.797	14.1743	15.5166	17.7057	23.2762	19.1862	18.603	14.6552	20.9711	27.6583	20.0172	18.7036	20.0333	22.5931	21.0469	22.3719	25.2054	23.1851	25.7291	12.7396	12.9398	14.2713	16.5364	15.5089	16.4439	19.296
Seita.1G066800	1.94292	2.52124	2.25744	1.16332	2.68751	1.75551	2.62469	3.34303	2.90488	1.69349	2.01927	0.983351	3.89702	2.19586	1.81936	3.1782	2.63936	2.32958	0.781961	0.498372	0.723703	4.7424	3.0757	2.17112	2.38465	3.09827	2.1758	2.64599	1.8159	0.906609	10.9471	5.33884	2.02748	1.97021	1.71699	1.72744	1.2203	1.09062	1.21637	3.88454	2.10327	2.75129	3.03422	3.71579	3.70786	1.28322	1.39657	0.921938	4.73605
Seita.1G066900	0.059221	0	0	0	0.189208	0	0	0	0	3.69709	2.58091	2.21873	0.505401	0.150846	0.066446	0	0	0	1.66624	3.11381	3.34594	0.167051	0.34377	0.079242	0	0	0	0	0.242897	0.237033	11.555	2.27841	0.627692	0	0	0	0.209472	0.833156	0.066581	2.0791	0.834418	0.196369	0	0	0	6.71387	5.42786	3.34527	0.273731
Seita.1G067000	8.9647	10.2305	12.5959	9.1378	9.41897	8.88691	5.96922	5.62129	8.86092	12.8082	9.46837	15.3819	11.0369	9.43783	13.9552	5.43496	6.05324	5.19173	17.0445	17.9268	15.452	12.9956	16.7776	12.2379	4.79157	6.16391	7.17785	10.5532	12.0612	9.17361	30.0892	14.4362	12.6783	6.87019	6.3244	7.7024	15.6926	16.1489	14.6241	12.972	8.56182	12.0158	7.7993	6.10384	6.63719	18.8896	15.1891	13.4131	13.5591
Seita.1G067100	0.04278	0.263402	1.31213	0	0.251701	0	0	0	0	0.050442	0.058893	0	0	0.054303	1.53248	0	0	0	0	0.051901	0	5.70958	3.97369	0	0	0	0	0	0.17925	0	1.22163	0.919922	0.31219	0	0	0	0.053219	0.096228	0.04925	0.347234	0.108024	0.119625	0	0	0	0	0	0.070956	1.1609
Seita.1G067200	75.6063	61.5106	72.886	57.893	56.1406	55.105	20.2573	21.4055	15.1346	39.5335	54.9886	26.7243	83.7406	94.313	48.8548	24.0077	22.2276	21.3779	29.3392	25.9564	25.2211	40.2891	46.5871	92.5633	27.532	29.2667	21.4723	37.84	36.2408	15.8981	30.6021	40.1506	22.1399	26.125	26.2381	26.8664	28.1239	30.9669	31.7588	32.3147	54.7177	41.2369	13.9923	16.451	18.3168	25.8979	24.1045	27.9452	26.0959
Seita.1G067300	22.5981	25.4956	31.2995	22.3566	20.0807	18.3074	2.7528	3.01657	3.00849	7.68128	9.60399	7.05039	27.6552	21.243	26.0218	1.72526	2.01888	2.14442	7.44895	5.80958	6.24347	29.1571	32.313	22.0981	1.83256	1.30348	2.04396	5.41136	5.38644	2.95547	11.5481	9.32712	9.23265	1.4049	1.16609	1.7423	4.21087	4.34498	4.32694	8.18072	10.9632	11.4354	2.2902	2.25887	2.59099	7.68589	7.16963	7.03787	27.4523
Seita.1G067400	0.202089	0.296078	0.427958	0.011571	0.065192	0	3.93411	3.89936	3.1985	41.2892	61.0703	25.4056	0.343885	5.66716	0.409654	1.09469	1.21152	1.1451	91.6728	92.414	96.3992	0.400492	0.727648	0.317389	6.17724	4.64562	6.90081	10.4877	11.9362	23.7855	1.88558	1.48336	1.75991	20.1838	18.1797	13.9971	23.3242	18.0974	19.5013	1.47793	0.658702	7.49403	5.99408	4.96535	2.44567	49.9006	61.0578	71.3211	5.0953
Seita.1G067600	0	0	0	0	0	0	0	0	0	0.07401	0	0.061038	0	0	0	0	0	0	0.042864	0	0	0	0	0	0	0	0	0	0.042564	0.058526	0	0	0	0	0	0	0	0	0	0	0	0	0	0	0	0.029891	0.198799	0.14955	0
Seita.1G067700	14.3811	14.0036	14.4525	14.4463	14.1561	14.5755	17.1609	14.7788	24.6017	14.4041	11.0757	20.0179	11.1713	11.0703	18.0012	14.2598	15.8526	13.426	10.8357	11.9937	11.8289	12.2576	13.4017	12.2962	16.5071	16.5869	27.1482	14.5944	12.9139	26.9299	11.7337	12.8836	20.1981	17.9929	20.9362	19.517	15.2012	15.8916	17.0637	12.5838	15.0297	14.428	16.2446	15.4383	15.8265	11.7818	11.8509	12.7236	14.6349
Seita.1G067800	124.258	153.357	147.69	158.52	124.148	166.107	128.039	153.448	86.4303	182.052	219.679	130.696	168.007	173.919	127.358	139.211	130.043	116.262	194.638	216.66	178.41	320.225	254.745	167.492	197.834	167.247	103.369	166.548	177.372	106.614	139.402	152.159	106.725	118.61	119.056	116.422	150.123	140.534	152.165	101.507	131.657	119.449	99.4864	112.959	98.0303	179.143	188.484	192.032	266.318
Seita.1G067900	11.7222	13.3517	15.5715	24.8447	12.6601	21.6604	17.198	15.7846	7.45872	14.8623	25.6568	9.95245	21.2377	13.6272	10.556	20.8933	18.2585	18.8213	20.7064	18.1643	17.6754	29.3001	25.8051	22.6995	25.7139	20.9284	9.79394	17.7917	19.5636	8.3994	10.3727	12.6918	6.37291	18.2059	19.8287	17.1344	13.7481	13.4119	16.7749	11.5644	12.1513	9.95073	13.3793	14.6746	15.4652	13.8277	14.0126	15.2337	27.5468
Seita.1G068000	2.02891	1.63433	1.81704	2.38633	0.156647	2.87213	0.556761	0.739786	0.738423	0.880159	1.21236	0.590652	1.31845	0.856803	0.935192	0.842736	0.734904	0.631383	0.723625	0.470473	0.369531	1.47158	1.82145	0.516337	1.9488	1.74007	0.811534	0.841905	1.34137	0.705031	5.70045	2.39455	1.28649	0.644673	0.631523	1.10213	0.68	0.825382	0.64148	1.63722	0.837986	1.09254	1.11033	1.70384	1.91016	1.28556	1.47294	1.59347	1.97912
Seita.1G068100	6.49234	8.27875	10.6765	9.14707	8.2373	9.94744	11.7288	9.49776	12.6828	14.7436	17.3314	11.2104	10.9221	8.38862	14.6876	14.5449	13.8352	12.3828	9.36561	9.36763	8.11849	20.9521	22.2817	9.73305	17.5634	20.5028	15.5021	22.2461	29.3506	16.0764	19.8842	19.7983	19.575	14.8585	14.7312	15.7518	15.9635	15.7632	14.781	20.0966	16.8673	17.6464	3.98632	5.05556	5.44206	6.95837	4.41045	5.85467	6.78328
Seita.1G068200	12.5154	12.6597	13.7125	18.5666	12.6898	17.5842	7.67417	5.91437	6.35308	13.6266	14.7902	13.8653	10.0049	9.65871	12.4734	7.70433	9.11338	8.95088	17.3019	16.4998	15.6765	11.904	12.6033	12.1691	8.31881	8.11147	9.48143	11.6604	12.1945	8.52554	6.46125	6.24401	8.893	12.249	9.82781	12.3635	10.744	12.8252	12.9947	6.64317	11.3963	11.4918	5.90455	5.26756	7.48246	15.1677	14.9796	9.62795	16.809
Seita.1G068300	58.7726	75.3716	50.9739	111.005	69.7329	101.114	63.1254	62.6209	54.387	40.1683	36.574	44.0697	46.6208	42.4625	58.9657	57.7389	59.6968	56.2157	54.231	54.7416	51.1651	71.1568	57.8397	46.3325	81.5546	79.3553	71.3609	51.1468	50.8303	49.0969	118.337	70.8676	76.8626	93.2352	98.2788	98.4814	81.7646	94.3331	84.9323	56.9868	68.7809	74.0542	66.295	57.991	72.0409	57.8378	62.3285	47.6006	161.403
Seita.1G068400	0	0.278304	0	0	0	0.052624	0	0.064779	0.106272	0.07889	0.275968	0.192675	0	0	0.040166	0	0.122878	0.021948	0.082083	0.030152	0.038335	0	0.220736	0.049045	0	0	0	0.134258	0.210708	0.145576	0	0	0.027148	0	0.096056	0.047882	0.328756	0.453407	0.342667	0.038125	0.183783	0.082213	0.172265	0.02694	0.046085	0.03915	0.11087	0.025501	0.003106
Seita.1G068500	3.62566	4.0361	5.88551	3.33553	5.88289	4.01896	4.75073	5.84645	5.07717	3.59544	5.96203	3.32462	3.10685	4.83471	6.40506	7.28215	5.86384	6.75991	2.38279	1.69018	1.75574	8.58599	12.8741	6.6597	3.6951	3.4027	1.94705	7.89653	8.15015	5.07033	7.08869	6.8811	3.04352	2.01984	1.93672	2.98998	6.8129	6.92053	6.65875	8.99747	11.1693	7.45624	3.52264	3.78627	2.40365	1.21434	1.40818	1.97114	5.63787
Seita.1G068600	72.9757	40.743	100.415	35.9162	34.4476	46.0529	44.6337	38.6727	28.8225	145.471	187.088	102.933	107.01	90.6206	49.3219	31.5206	48.2743	45.9876	92.9645	113.957	82.3145	139.634	141.663	108.412	71.0941	43.4833	31.8329	90.7948	94.6155	73.9757	24.4138	40.9168	39.281	61.483	57.5432	71.359	139.21	151.533	113.298	72.8499	58.9433	68.6338	29.8852	32.2714	24.7878	66.2915	69.1614	65.4467	17.514
Seita.1G068700	0.748083	0.447942	0.588004	0.08567	0.104186	0.042683	3.02709	4.3301	3.49006	0.130487	0.430055	0.055827	2.70047	1.14893	0.427778	4.36875	3.52462	1.97532	0.092989	0	0.090911	0.56028	0.619107	1.53899	0.18685	0.303626	0.114833	0.121208	0.105758	0.013849	0.038662	0.229368	0	1.05022	1.29299	0.413156	0.01894	0.018679	0.017586	0.06097	0.096108	0.036283	3.06227	1.83493	2.12061	0.045318	0.059646	0.069054	0.274136
Seita.1G068800	145.39	121.397	164.812	19.4791	51.2201	22.8213	59.7796	69.2711	57.7576	140.289	284.11	108.033	753.209	283.772	136.938	45.691	37.8409	35.7743	78.2035	71.3496	59.3292	134.559	129.384	401.721	32.2711	26.3981	11.0976	106.977	101.453	30.023	18.4787	66.5043	24.2846	12.4812	11.303	17.8954	56.993	68.1133	54.7718	26.214	49.7117	15.4663	35.3869	37.1058	39.156	69.8517	85.9943	86.128	42.0375
Seita.1G068900	4.33314	3.57256	6.05541	0	5.38895	4.46246	3.10243	2.223	5.9349	1.14384	0.90967	2.48116	1.25032	0.838704	4.50889	0	0	0	0	0	0	0	0	0	0.514776	0.790512	3.79891	3.61085	1.1063	1.90953	3.36202	2.12699	8.00321	0	0	0	0	0	0	0	0	0	0	0	0	0	0	0	0
Seita.1G069000	0.018035	0	0	0.020683	0	0.038172	0	0	0	0.308333	0.361491	0.202037	0	0.044559	0	0.023449	0	0	0.047683	0.062765	0.084048	0	0	0.024132	0	0	0.009808	0.319173	0.490331	0.343127	0	0	0	0	0	0	0.534705	0.279373	0.383507	0	0	0	0	0	0	0.017476	0.320318	0.185083	0
Seita.1G069100	2.50845	2.822	3.29169	5.19235	4.78803	4.87896	3.53907	2.97954	2.88072	2.32857	3.3308	1.63911	2.39258	2.51314	3.22506	4.10765	3.69949	3.9464	1.51721	1.59822	1.97953	6.20886	7.43377	3.70266	8.31651	7.37968	4.19727	5.40958	5.14252	1.76634	11.1454	7.06034	4.91106	6.31969	7.27554	6.39884	2.28643	3.39264	2.23469	5.14241	4.35469	3.42631	2.55948	2.83139	3.19631	1.21813	1.05088	1.49841	3.49944
Seita.1G069200	33.0869	29.3999	32.336	31.1419	32.3692	28.1746	22.4348	19.9765	22.2245	23.0181	22.8293	19.9042	23.9115	24.8625	28.3286	23.0324	24.2439	24.5131	26.3695	24.2964	25.3126	26.6954	31.8328	31.0296	16.858	18.3062	18.9309	20.9722	21.3727	15.1267	20.6358	25.3795	22.121	24.055	23.63	22.8465	25.5611	27.8341	26.3857	27.1405	32.0685	29.3567	23.7537	22.0254	22.177	25.3828	23.6636	23.5238	23.3701
Seita.1G069300	27.1016	24.7141	24.3255	20.1458	20.7238	18.26	12.4083	10.2457	13.5389	11.9294	12.3758	11.8016	23.0853	22.3061	20.3834	11.9661	13.4521	12.7536	13.3459	11.2166	12.7384	18.2643	20.8413	28.9804	10.3217	8.79759	10.6488	10.1066	9.09332	6.07815	11.9748	11.5963	13.386	11.7392	11.4015	13.472	11.6458	12.0908	9.20604	12.4298	18.9126	14.9225	10.1399	11.4143	10.9315	11.6808	12.6074	14.4892	16.7447
Seita.1G069400	12.7776	11.738	16.6303	4.85008	5.73451	5.04526	14.7967	14.6583	17.3029	11.318	18.0272	12.5447	4.92683	11.9995	17.4835	22.5938	17.6456	15.2914	6.70509	5.39822	6.48311	7.5356	13.2159	4.76392	18.045	23.6522	13.6521	17.9061	18.5654	11.1257	15.312	9.24237	5.74328	13.6465	13.7917	14.3006	12.556	12.7984	12.4854	11.7648	8.01768	9.11559	13.2604	15.669	17.1225	6.90612	8.81673	9.5027	7.06059
Seita.1G069500	9.23702	10.7576	10.4345	21.2391	26.5915	24.0448	9.22096	7.71679	6.56398	26.3692	21.7594	28.1447	14.6723	8.9086	13.7846	13.1877	14.5245	13.3207	22.995	24.4555	22.8375	19.8278	15.4784	8.25499	42.3705	39.2121	28.159	139.519	142.696	112.423	35.8159	34.8744	44.7412	34.2689	32.2518	33.8216	115.045	113.039	127.873	38.952	16.4633	25.5394	10.6996	9.14715	11.4317	19.7327	20.3579	18.1736	7.79287
Seita.1G069600	9.68457	9.10827	10.7025	13.1686	10.5507	11.566	8.83432	6.88574	7.32236	35.2898	30.6531	34.4551	11.8674	9.99212	8.63734	12.6614	13.237	12.3845	74.7724	83.2222	74.3049	9.10177	9.70785	11.4854	12.2823	11.045	10.4775	20.761	23.0151	25.8919	5.54217	5.95754	7.35816	13.0612	10.7671	11.8885	26.9541	29.0253	29.252	8.59463	9.28893	12.0284	7.875	8.16938	7.60423	66.0385	59.147	61.4778	7.00301
Seita.1G069700	9.92405	8.48403	11.1887	9.99452	10.8546	9.82562	25.0441	22.1187	20.0829	3.0705	3.27364	3.35584	7.81814	6.07482	9.71676	33.661	26.6846	29.3932	3.94593	3.89687	3.47777	10.2355	7.89286	6.72398	12.1041	16.7538	17.258	5.2251	7.12886	3.75574	9.50432	8.08392	8.7515	14.6172	17.5238	15.3842	4.24094	4.71227	5.53334	7.78609	6.68206	9.38596	26.3399	27.3807	31.4545	2.79145	2.46274	3.1561	5.76718
Seita.1G069800	2.40672	2.54866	1.38454	1.45562	0.754229	0.793652	0.111569	0.343003	0.308035	2.12656	1.96915	1.55657	1.31426	2.44472	1.79819	0.148138	0.218263	0	0.99836	1.84583	1.69444	1.55215	2.07717	0.804058	0.801299	1.06989	0.728825	1.29619	1.55066	1.28665	1.66355	0.957146	0.503035	0.586967	0.373277	0.470259	1.73951	0.978784	1.10494	1.38221	1.01706	0.80234	0	0.115424	0.291114	2.03811	2.56865	2.26502	2.38152
Seita.1G069900	71.4106	69.869	84.7931	58.5411	52.8944	72.062	53.7001	49.6222	44.5529	83.495	95.2903	62.7803	66.855	49.1333	72.6427	47.3581	45.4975	42.3237	73.8046	60.1891	59.6072	46.4653	54.0217	49.786	38.4956	40.8776	35.6554	104.491	109.717	65.5728	94.7523	68.3677	44.7954	53.6337	52.4777	64.8203	117.433	113.045	122.428	84.4304	74.2539	72.8962	32.5964	35.4539	37.9354	50.7843	49.3535	56.9363	48.1751
Seita.1G070000	0	0	0	0	0	0	0.561005	0.129912	0.689517	0.20275	0.714731	0.751491	0.255776	0.086068	0.366565	0.059105	0.14687	0	0.067004	0.514251	0.388953	0	0.092911	0	0.317073	0.418012	0.163935	1.08711	0	0.464753	0.557315	0.063576	0.406402	0	0.207757	0	0.476334	1.14882	0.57083	0	0.063991	0.576752	0	0	0	0.159128	0.124988	0.382024	0.277865
Seita.1G070100	0.254596	0.65338	0.580519	0.277297	0.677664	0.356823	0.088587	0	0	0.2139	0.147419	0.103267	0.045407	0.06199	0.419424	0	0	0	0.021802	0.127591	0	2.13542	1.90699	0.414437	0	0.011063	0	0.252204	0.251604	0.087822	0.060407	0.108432	0.198063	0.036423	0	0	0.082064	0.109804	0.119342	0.1147	0.101886	0.135572	0	0.006659	0	0.111384	0.044107	0	1.62039
Seita.1G070200	1.58964	1.39618	2.00454	6.52927	2.71624	6.65055	1.50074	0.460718	1.03166	36.6855	31.5993	30.6177	1.10328	1.96686	1.75157	2.5018	2.2991	3.5843	23.9411	27.4142	31.195	1.43358	2.4341	4.35636	2.04481	1.5454	2.19762	19.2939	19.0991	18.6758	0.564346	2.03457	2.90777	3.56725	1.9806	1.93791	22.3853	27.1707	21.4709	4.40327	7.3939	9.03576	0.537514	0.535912	0.296398	21.7684	3.05252	23.9381	0.543125
Seita.1G070300	0	0	0	0.065282	0	0	0	0	0	0	0	0.037548	0	0	0	0	0	0	0	0	0	0	0	0	0	0	0	0	0	0.057452	0	0.044472	0	0	0	0	0.046277	0	0	0.030748	0	0	0.027475	0	0	0.028993	0	0.006558	0
Seita.1G070400	5.83908	2.79834	4.26893	8.87685	9.10684	7.02079	13.9258	13.2544	6.77625	6.97593	6.11119	3.44832	13.6653	3.32343	4.35362	16.7423	15.8771	17.0087	4.3198	1.6449	2.83823	8.35104	9.52687	4.33298	24.7477	18.8417	12.0088	19.9039	25.4518	19.7377	18.4705	23.8043	14.9829	8.46685	12.0221	13.6489	16.3037	17.0363	15.593	14.7702	13.0281	11.9209	10.7763	8.31801	12.9661	2.50513	2.60459	1.98935	2.4005
Seita.1G070500	0.067713	0.069104	0.12537	0.196709	0.112685	0.116062	0	0	0	0	0	0	0	0	0	0.039664	0.050826	0.062253	0.043482	0.003132	0.011873	0.023653	0.059504	0.023671	0.00706	0	0	0	0	0	0.006405	0	0	0.011066	0.044653	0.040666	0.04329	0.024736	0.02937	0.056029	0.031717	0.05317	0	0.002432	0	0	0	0	0.005868
Seita.1G070700	2.16599	2.83415	3.37605	3.47645	5.89336	4.48166	3.93431	4.23442	3.21494	4.3234	4.04029	3.70424	2.36915	2.12221	2.15386	6.8112	7.30609	7.38857	4.5309	3.91501	3.41411	3.98796	3.81022	2.91286	5.0065	5.09441	4.05927	4.15794	4.63939	2.82773	4.29238	7.10418	5.85602	4.88786	4.47498	4.4562	5.45785	7.17748	5.36673	5.92803	3.68352	5.01455	6.66407	6.17989	5.43977	4.54558	3.80041	4.13633	3.37372
Seita.1G070800	0.115043	3.2736	0.296834	0.168001	0.987352	0.248467	0	0	0	0.207621	0.357696	0.40121	0.179036	0.354334	1.85935	0	0	0	0.368312	0.125634	0.405071	18.6604	11.8834	0.466258	0.203987	0.048809	0.123	0.898371	0.83433	0.717602	0.837178	15.4472	29.0973	0.047747	0	0.105925	0.490801	0.752548	1.07487	8.77636	0.84344	0.998697	0	0	0	0.211775	0.232566	0.208614	7.76219
Seita.1G070900	16.6081	13.7951	14.9327	15.85	16.5001	14.4787	10.8845	9.85538	10.8883	17.811	15.7978	14.9217	13.2849	14.6521	14.0831	11.2639	12.2201	10.7496	17.4015	14.66	15.3296	15.7112	16.1009	16.8144	12.8755	14.2482	13.4605	13.7871	13.4524	9.29006	12.7637	19.739	17.8322	14.7346	14.2011	16.7013	14.5516	15.0639	15.6836	17.7941	17.7485	16.7356	9.92654	8.33615	8.95132	15.8845	14.3217	15.0937	10.5414
Seita.1G071000	0	0	0	0	0	0.089042	0	0	0	0	0	0	0	0	0	0	0	0	0	0	0	0	0	0	0	0	0	0	0	0	0	0	0	0	0	0	0	0	0.097186	0.194188	0	0	0	0	0	0	0	0	0
Seita.1G071400	0	0	0	0	0	0	0	0	0	0	0	0	0	0	0	0	0	0	0	0	0	0	0	0	0	0	0	0	0	0	0	0	0	0	0	0	0.109812	0	0	0	0	0	0	0	0	0	0	0	0
Seita.1G071500	0	0	0	0	0	0	0	0	0	0	0	0	0	0	0	0	0	0	0	0.084215	0	0	0	0	0	0	0	0	0	0.051648	0	0	0	0	0	0	0	0	0	0	0	0	0	0	0	0	0	0	0
Seita.1G071600	47.1027	42.7739	44.7252	33.3406	30.2156	30.937	14.2119	16.9934	11.4444	74.3044	74.1732	66.0435	32.4289	50.3593	48.145	16.3675	19.1442	12.9993	87.1675	93.8056	91.4905	69.8256	60.8106	40.5381	26.4672	27.2898	16.6363	35.4482	34.8379	28.65	29.7298	24.0378	23.167	14.9025	13.903	13.9291	49.2199	48.9429	49.0913	19.7607	36.0942	31.3697	13.4764	12.2264	12.44	99.2075	94.7647	82.6323	49.5728
Seita.1G071700	26.9707	14.3357	18.5909	13.2113	10.0225	10.3627	0.022056	0	0	1.04171	1.93877	0.915092	17.4541	31.2465	18.3507	0.149283	0.18443	0.270238	1.62687	0.90458	1.59915	7.60929	10.3863	22.5473	0.469345	0.73345	0.277889	1.76236	1.39902	0.53631	0.866344	3.97081	2.32142	0.238798	0.324767	0.41247	0.550177	0.463349	0.651418	2.69319	18.3021	11.3441	0.246711	0.309177	0.098205	0.852506	0.915811	1.05543	12.1243
Seita.1G071800	16.6256	11.2381	21.6101	11.5961	12.9943	10.5523	0.57985	0.655574	0.446136	0.883143	1.41178	0.862222	25.1774	16.5464	18.1205	0.442305	0.479481	0.729967	0.222871	0.144096	0.361181	26.457	21.1416	14.3974	2.22274	1.4836	0.861565	0.845057	0.832788	0.195469	4.12937	7.07919	8.52565	0.398545	0.35892	0.466482	0.289741	0.194396	0.284412	4.78695	7.85191	6.01332	0.230051	0.388407	0.556075	0.23193	0.17675	0.178294	11.1044
Seita.1G071900	27.7673	26.3254	36.6656	32.51	33.2032	36.1878	24.1779	25.4234	21.4449	35.7234	59.0325	27.0945	40.5325	27.7185	27.865	30.0332	32.1378	25.7597	34.5718	27.579	29.6281	41.0597	51.1985	41.6855	36.8071	36.1133	26.849	55.8231	56.0321	24.1205	44.1093	37.9356	23.7954	36.5196	30.3468	35.6477	46.0817	45.7242	49.4064	34.6113	38.7017	30.7447	18.362	21.6429	21.0492	24.9672	21.8596	23.9257	24.2714
Seita.1G072000	0	0	0	0	0	0	0.026684	0	0.024098	0	0	0	0.049057	0	0.054433	0.059743	0.053761	0.023198	0.016418	0.030741	0.054284	0.799409	0.504743	0.302667	0	0	0	0	0.088023	0.056485	0	0	0	0.17806	0.656438	0.392978	0.046719	0.151813	0.29213	0.095842	0.240512	0.546189	0	0	0	0	0	0.02207	0.028701
Seita.1G072100	0	0.012317	0	0	0.02568	0.028919	0.038685	0	0.022907	0.11322	0.099474	0.075273	0.023739	0	0.026935	0.030671	0.016096	0.038541	0.07389	0.058835	0.072289	0.101236	0.026228	0.03967	0.083079	0.049906	0.045693	0.052969	0.083038	0.01969	0.026578	0.124888	0	0.032412	0.028393	0.060021	0.101624	0.093295	0.089564	0.07753	0.060212	0.052229	0.0127	0	0.003069	0.036116	0.036433	0.047993	0.04161
Seita.1G072200	0	0	0	0	0	0	0	0	0	0	0	0	0	0.039001	0.032297	0	0	0	0	0.037151	0.035678	0.129572	0.033967	0	0	0	0	0	0	0	0	0	0	0	0	0	0.036317	0	0.404301	0	0	0	0	0	0	0	0	0	0.070772
Seita.1G072300	0.056642	0.058437	0	0.22847	0.129856	0.180194	2.69581	2.09395	2.3771	0.033572	0	0	0	0	0	0	0	0	0	0	0	0	0.031372	0	2.72968	2.58132	1.76441	0.07658	0.01763	0	0	0.123864	0.150108	0.015511	0	0	0	0.017583	0.031793	0	0.0695	0	1.89572	2.61626	2.43549	0	0	0.075899	0
Seita.1G072400	0.513501	0.378191	0.799311	0.243512	0.289108	0.217898	0.253332	0.113186	0.394298	0.648864	0.473508	1.0813	0.238587	0.313018	0.711721	1.5116	0.774204	0.878172	2.80321	2.62525	2.98817	1.40148	2.27999	1.08841	0.266896	0.246995	0.610115	0.190534	0.059899	0.67502	0.081682	0.443152	0.949553	0.772195	0.584177	0.643067	2.61819	1.44212	2.15148	1.37989	0.881273	2.03474	0.23378	0.173939	0.293614	2.44723	2.00158	1.92833	0.503503
Seita.1G072500	0	0	0	0	0	0	0	0	0	0	0.031646	0	0	0	0	6.29964	5.26217	4.33199	1.24419	0.600079	0.993315	1.80085	1.94767	2.47725	0	0	0	0	0	0	0	0	0	6.65233	6.08574	5.95968	1.8176	1.76106	1.94317	3.02096	3.92234	3.57912	0	0	0	0	0	0	0
Seita.1G072600	11.8537	13.9007	14.4994	20.2144	18.2329	17.8689	13.6057	12.0124	7.66046	13.9074	14.7226	10.5311	11.9051	11.1747	11.9982	18.3783	16.4008	16.4422	18.2672	17.6645	16.142	15.8667	19.1781	16.9695	17.6834	18.5004	12.153	17.952	20.9957	10.2247	13.686	12.6847	11.3098	24.5654	23.5808	22.3746	21.0049	18.9199	22.0634	16.3984	19.2082	16.6577	7.59418	9.0866	10.8744	9.19165	9.40684	11.6593	11.3982
Seita.1G072700	124.122	108.032	83.6761	55.2182	69.3311	55.4793	3.47746	3.85687	2.96856	39.5884	47.0787	30.6568	84.3846	116.672	72.0564	6.45046	6.28151	6.68149	57.2743	65.0063	50.815	80.2321	69.3277	120.498	9.49652	11.5226	8.09206	28.042	24.512	12.4621	15.2862	32.2003	22.245	7.45763	9.62225	11.0207	19.8309	22.5059	20.8071	27.4914	88.4507	52.2952	3.52842	3.32812	3.12891	42.702	51.6515	42.5052	89.6866
Seita.1G072800	0.21514	0.084585	0.04982	0.263303	0.62709	0.218749	0	0	0	0.025837	0	0	0.147708	0.128474	0.244419	0	0	0	0	0	0	0	0	0	0.03457	0.081946	0.042076	0.01709	0	0.044177	0.018571	0.566577	0.536522	0	0	0	0	0	0	0	0	0	0	0	0	0.015066	0.012753	0	0.097344
Seita.1G072900	0.615998	0.349124	0.485726	4.21018	3.37385	3.85642	0.255365	0.020926	0.305246	2.8394	1.0854	3.26778	1.01728	0.750854	0.864412	0.022939	0.0235	0	0	0	0.010277	0	0	0	0.565182	0.825319	0.803055	4.11427	3.9504	6.869	3.22589	9.48964	6.93134	0.019482	0.104859	0.06517	0.020923	0	0	0	0	0	0	0.084478	0.022182	4.56895	3.46309	3.23286	0.477351
Seita.1G073000	9.56199	7.39673	8.09941	5.99069	8.45497	8.7176	49.5818	58.4467	52.9072	0.041465	0	0	4.50761	4.34813	6.6034	106.107	112.693	112.879	0.023323	0	0.144133	3.53678	2.85011	3.39424	34.3871	40.0152	40.5561	0.192934	0.073921	0.191139	3.91052	2.29479	7.58493	41.5482	47.6079	42.7967	0.407212	0.06472	0	2.53941	3.45166	4.0167	58.2788	61.1847	65.1906	0	0	0	1.92758
Seita.1G073100	15.5705	16.1627	15.3975	15.6352	16.1298	16.7047	22.5117	22.9298	21.2254	12.3448	9.91208	12.5529	13.8637	8.7895	11.8569	32.5305	30.1258	33.0233	10.6524	8.28023	8.94499	5.69623	9.94502	6.75751	18.9984	24.9784	22.3197	11.9636	10.363	11.3784	13.5326	7.53755	8.33337	31.5139	35.8276	33.0869	8.20257	7.37635	7.71583	6.85255	8.91846	7.97331	38.0288	40.5432	45.0415	21.2955	20.4827	18.7383	8.72814
Seita.1G073300	3.17793	2.50272	3.38378	5.16104	3.95517	4.6647	2.14201	1.73309	2.69702	0.617524	0.315167	0.426205	2.05329	1.56729	2.7037	2.53288	2.84786	2.64204	0.543216	0.661698	0.464309	2.04878	2.10976	3.22794	2.16591	2.63582	2.88685	0.424956	0.252712	0.602347	1.16092	2.30123	2.54593	2.85742	3.01433	3.26871	0.754896	0.978766	0.894604	1.89782	4.30771	3.0191	2.79566	2.08535	3.16046	0.910327	0.613472	0.834545	3.58778
Seita.1G073400	56.4671	81.4152	69.2217	75.0024	55.7215	73.6261	72.3841	81.3045	60.9111	120.74	146.004	100.584	54.3509	49.0812	66.0394	97.6039	96.6767	84.8792	119.914	107.865	104.516	128.156	111.205	51.6484	163.887	151.017	94.7306	68.4871	77.7506	45.7302	115.888	65.748	68.14	122.84	126.485	133.487	85.2705	88.5498	91.0387	49.8781	81.6041	69.1806	84.863	73.4039	81.6536	151.798	156.111	147.77	124.929
Seita.1G073500	54.2133	98.2291	70.8179	198.504	121.858	208.474	133.004	125.859	84.9588	146.942	116.872	107.516	84.7552	75.5006	66.539	131.333	132.05	112.972	142.691	157.537	136.668	252.465	205.189	129.497	308.238	247.676	140.295	180.296	161.847	124.833	276.866	202.525	136.237	144.526	148.485	143.2	139.915	140.67	145.062	186.535	154.99	143.951	113.323	101.434	96.8665	138.016	164.251	135.996	233.004
Seita.1G073600	3.84372	3.19516	3.375	4.08573	4.84552	4.31192	8.81723	7.7165	8.43447	1.94168	1.43558	1.98223	2.05981	2.46204	2.99859	10.2235	9.98189	9.74081	1.64804	1.52603	1.83825	1.87624	2.06554	3.06504	9.86806	10.7521	11.8132	1.92298	1.69881	1.32883	2.35189	2.00971	2.65339	14.5283	17.9407	13.669	1.7158	1.95794	1.56959	1.46615	3.7957	3.16748	11.7192	11.2118	12.2194	1.42127	1.30329	1.34268	1.81939
Seita.1G073700	2.92299	2.33149	4.90704	3.30271	3.35338	3.91366	3.98611	5.08363	2.92197	5.71195	6.85611	2.98171	3.79214	3.51503	4.05603	6.63969	5.74532	5.03479	5.21756	4.73655	4.8424	7.33803	6.5289	4.99992	6.75779	7.58194	4.08031	7.19766	6.66089	3.15603	3.41207	2.78543	2.33763	4.33191	5.46718	5.40687	4.17496	4.51556	5.4848	2.8792	3.01064	2.70619	3.91873	3.92272	3.38411	3.07402	4.13955	4.23047	3.36459
Seita.1G073800	45.0577	47.7869	36.5935	43.9567	47.6468	43.7284	59.0175	53.2818	58.438	6.8507	7.17407	7.88143	30.3815	23.9062	34.6905	75.3216	80.6405	70.03	8.11046	9.21175	8.07311	21.5911	20.9092	21.7083	47.3779	61.5325	53.9809	6.12184	6.66479	4.46172	21.3274	20.8342	33.2036	51.6304	53.8203	54.987	6.81633	6.18493	7.05	17.1014	34.6751	31.7217	64.8418	55.9131	68.8248	6.32425	7.57342	5.92591	33.6281
Seita.1G073900	5.18837	2.79522	4.27823	5.77554	5.36856	4.67508	15.0517	18.6677	14.7669	1.41535	1.78657	1.25393	4.36829	3.19348	2.53547	22.1925	19.2024	18.2266	0.631943	0.738591	0.651329	3.27467	3.20588	4.18972	13.785	17.0663	13.7662	0.605574	0.961519	0.676726	1.98014	4.59121	5.17507	18.0057	19.4861	18.3282	0.747752	0.818337	0.450838	3.7777	4.49662	3.60423	18.682	18.1139	18.4785	0.274527	0.330054	0.80631	1.95855
Seita.1G074000	7.49838	8.7611	10.1712	3.40135	6.34916	3.41296	10.9923	11.9784	9.30673	17.1476	18.153	14.3097	8.65655	8.0903	11.5147	13.4606	11.3273	9.75348	17.0269	15.9885	15.0106	15.0604	16.8062	5.29693	13.3992	13.4845	12.0478	14.1513	18.8104	12.0658	38.4095	18.687	10.7257	15.1338	13.2322	15.3346	14.6985	13.7308	15.7561	16.2356	3.66603	8.16574	8.18495	10.2108	9.5886	14.1007	13.8481	15.1849	15.6396
Seita.1G074100	5.15937	4.48515	4.83101	4.4062	4.55075	4.34807	3.23476	2.44606	2.76223	5.58758	6.19728	5.30282	3.45097	3.79913	5.09881	3.40921	3.54443	3.05031	6.45007	5.4296	5.66948	3.35474	3.77566	3.62041	2.41939	3.0831	3.28573	4.16799	4.96292	2.9722	4.96313	3.44871	3.18696	3.20481	2.67659	4.00964	3.64504	4.03214	4.31819	3.52618	4.55356	3.84856	2.58185	2.57364	2.79139	7.5636	6.2401	7.12384	5.64426
Seita.1G074200	8.11623	6.50419	7.76161	3.78971	5.13796	2.39528	0.085642	0.023077	0.077342	0.759762	0.58464	2.57798	2.01024	2.40791	4.80171	0.051711	0.03498	0	0.279723	0.501036	0.426192	2.52497	2.77998	3.11162	0.111836	0.330645	0.438982	0.965141	0.28986	0.342666	11.1921	0.666993	1.76809	0.120885	0.031587	0.178919	0.164952	0.076609	0.237159	0.497461	0.555723	0.509166	0.04096	0.037072	0.008058	0.960911	1.58493	0.798459	4.91402
Seita.1G074500	0	0	0	0	0	0	0	0	0	0	0	0	0	0	0	0	0	0	0	0	0	0	0	0	0	0	0	0	0	0	0	0	0	0	0	0	0	0	0	0	0	0	0	0	0	0	0	0.00785	0
Seita.1G074600	0	0	0	0	0	0	0	0	0	0	0	0	0	0	0	0	0	0	0	0	0	0	0	0	0	0	0	0	0	0	0	0	0	0	0	0	0	0	0	0	0	0	0	0	0	0	0	0	0.010441
Seita.1G074700	0.06213	0.797034	0.018922	0.023751	0.066195	0.043835	0.022249	0	0.069857	1.33127	0.557579	0.716396	0.310911	0.157379	0.328643	0.053677	0.031382	0.038193	0.406524	0.367406	0.368133	1.23626	1.15636	0.130311	0.070248	0.150865	0.133878	0.319625	0.531067	0.396881	0.954018	0.33544	0.518827	0.045739	0.071902	0.050661	0.191122	0.357768	0.222486	0.233379	0	0.127513	0	0.019701	0	0.470215	0.473963	0.330314	1.22132
Seita.1G074800	0	0	0.030537	0.982601	0.653132	1.24122	0.036446	0	0.016793	0	0	0.108175	0	0	0	0	0.046421	0.065359	0.022881	0.021211	0.076069	0.085537	0	0	0	0.028787	0.0187	0.044797	0	0.231476	0.228228	0.025727	0.069008	0.019113	0.034822	0.10801	0.115418	0.021236	0.01986	0.037425	0	0.057716	0.014479	0.013105	0	0.57195	25.9355	0.265706	0
Seita.1G074900	2.19881	1.84589	1.56248	2.40844	2.07226	2.68032	1.13588	0.888465	1.29366	2.24456	4.351	1.51605	2.30668	1.81783	3.03553	0.742863	1.36541	1.47419	0.709584	1.28351	0.749534	3.17216	2.0861	1.43542	2.26117	3.2125	2.6144	4.37254	4.1559	2.95002	6.88793	4.95829	5.32716	1.62413	2.90048	1.17494	2.68848	1.54662	2.35532	8.12112	3.88345	4.46275	1.01333	1.42422	0.987414	1.51812	2.0105	1.0168	1.03127
Seita.1G075000	0.238176	0.034933	0.412982	0.902386	2.15877	3.30573	0.00019	0.190618	0.592892	0.345744	0.027065	0.000167	0.197931	0.032169	0.000299	0.847569	0.25295	0.26393	1.03415	0.166663	1.2845	0.357942	0.411805	0.271174	0.315576	0.081928	0.002214	0.000186	0.000306	1.7e-05	2.9e-05	4e-05	0.001487	0.000127	0.533769	0.000477	0.000129	0.000116	0.000513	0.25621	0.000565	0.002544	0.062384	0.00831	0.004609	0.861994	0.976457	0.968988	0.044451
Seita.1G075100	9.7345	7.83901	10.3804	8.1399	10.2188	8.5981	0	0	0	0.018054	0.021947	0	0	0	0	0	0	0	0	0	0	0	0	0	0	0	0	0.010036	0	0	0.019974	0.023383	0.074061	0	0	0	0	0	0	0	0	0	3.63546	4.8066	4.26573	4.92726	5.1306	5.68959	4.6987
Seita.1G075200	0	0	0	0	0	0.046076	0	0	0	0	0	0	0	0	0	0	0	0	0	0	0	0	0	0	0	0	0	0	0	0	0.277485	0	0	0	0	0	0	0	0	0	0	0	0	0	0	0	0	0	0
Seita.1G075300	119.07	104.794	92.7835	157.316	145.918	139.391	88.615	73.5708	134.197	16.1971	10.273	46.5776	58.786	73.8108	119.435	90.1321	81.1186	96.8984	18.6876	18.7717	20.4256	43.7178	43.2348	103.565	107.241	87.0728	163.577	21.3636	12.7187	55.548	21.825	52.1184	131.22	117.557	130.383	114.256	23.3161	36.3423	20.5872	69.6809	181.858	144.817	94.3174	116.135	99.5936	22.6823	39.4897	22.0587	38.9299
Seita.1G075400	0.346166	0.120956	0.444012	0.657437	0.54847	0.746103	0.727686	0.357042	0.525245	0.318751	0.602956	0.434938	0.533534	0.326494	0.183594	0.622589	1.00393	0.613096	0.649477	0.461305	0.448547	0.934915	0.65048	0.726017	1.08114	0.744281	1.08064	0.490115	0.418024	0.338591	0.78955	0.817113	0.419275	0.989526	1.46725	0.964674	0.690745	0.511093	0.366048	0.487913	0.988632	0.370967	0.318288	0.303198	0.055639	0.422965	0.695402	0.695239	0.136437
Seita.1G075500	15.6399	16.6691	17.8524	29.8325	21.5672	25.0632	10.5346	9.79278	11.9756	11.8306	12.2079	13.8691	13.6885	12.0163	19.9912	11.6116	12.5431	11.8497	14.9652	15.2207	13.5147	19.6977	19.8514	16.5766	16.3973	16.7817	18.8125	13.281	14.0619	12.7926	18.9801	15.9831	17.3284	17.9857	18.3865	19.9562	16.9562	19.8012	19.1772	14.8457	18.9378	18.2285	13.4735	10.5963	15.6862	17.9446	15.3118	14.3276	19.123
Seita.1G075600	0.828974	2.87992	1.29414	0.227108	1.26891	0.445734	12.2316	9.78324	9.24105	9.16608	6.22627	10.7993	0.366943	1.07093	4.07341	15.7974	18.0879	16.2101	11.7697	14.0539	13.0897	5.35732	3.46426	0.265419	30.4239	29.327	30.3201	2.82519	2.96296	8.81706	5.63849	0.294105	2.38996	30.5567	34.0125	33.0575	11.766	9.78671	9.85759	0.171294	0.544907	0.913563	11.3528	11.6632	5.5931	5.83683	5.44631	6.37264	2.6734
Seita.1G075700	11.5104	10.3836	19.4316	13.151	13.3529	17.5737	12.5327	12.0019	15.4742	18.2529	15.8202	17.8207	13.0068	10.6216	18.1107	12.7272	17.2654	15.7733	14.3798	13.1075	16.2374	14.9869	20.0107	13.2082	13.3665	13.8076	14.6325	18.0678	19.5407	13.2908	31.8754	15.2174	18.0655	14.2443	14.1325	15.3762	18.3776	17.5914	17.7301	17.5921	16.2592	15.143	10.8114	9.27223	11.3246	12.6216	10.2426	10.2994	7.99041
Seita.1G075800	48.4321	70.6455	33.6607	54.4445	25.0298	52.2683	5.75814	4.48661	5.88537	15.4784	14.598	18.6766	22.9964	28.3825	32.1143	4.77877	5.45378	6.78156	16.6837	17.8475	13.7729	29.2325	26.3813	28.3496	6.92838	6.78509	7.68065	13.1495	10.7536	13.2989	13.7455	7.28341	9.66277	5.06977	5.42117	5.11257	5.73942	8.44943	6.69121	4.50636	11.4618	6.76002	7.75717	7.47584	7.57223	28.4474	31.9751	21.8228	116.331
Seita.1G075900	0	0	0	0	0	0	0	0	0	12.1168	4.30776	10.9428	0	0	0	0	0	0	11.022	11.1161	10.1105	0	0	0	0	0	0	0.116965	0.389353	0.376619	0	0	0	0	0	0	0.055995	0.061477	0.18982	0	0	0	0	0.060999	0	33.893	35.196	22.8865	0.063299
Seita.1G076000	0.353084	0.479201	0.75998	1.2819	0.954266	1.30534	0.339333	0.256244	0.467031	0.212475	0.118529	0.242891	0.026725	0.054953	0.242064	0.336811	0.319656	0.517241	0.268145	0.263613	0.213488	0.366161	0.503234	0.258587	0.318055	0.393731	0.42945	0.560406	0.299571	0.195289	0.302302	0.38496	0.466901	0.326672	0.316964	0.588275	0.062903	0.185702	0.224948	0.149262	0.309471	0.112552	1.1207	0.951421	1.19324	0.397498	0.359238	0.313004	0.877286
Seita.1G076100	8.6937	6.59986	6.01712	8.85067	7.30895	8.77489	1.60518	1.81918	0.921564	1.62376	1.00429	2.01704	0.489348	0.569834	0.564618	2.28339	1.64418	2.57226	1.32047	1.25974	1.27434	0.970183	0.690144	0.97228	2.56745	1.4304	2.10653	0.350905	0.705452	0.330775	0.178501	0.195156	0.191931	2.5842	1.68382	1.5953	0.435688	0.852145	0.709636	0.108127	0.501149	0.268567	13.7258	13.9148	16.6484	15.317	12.7043	13.2094	3.07447
Seita.1G076200	23.6286	22.7556	30.6223	23.1006	29.5474	25.5069	25.9231	22.7761	28.737	29.922	27.3019	27.4299	25.5518	21.5852	35.2274	29.7379	29.8799	34.6168	32.7483	30.493	35.3887	39.8476	46.303	30.3935	20.0082	25.2602	36.2897	32.9244	30.6542	28.0745	24.6912	27.5347	39.4916	43.0833	42.0635	43.6303	35.9995	36.8307	37.3628	32.2599	30.9372	39.4866	20.5136	19.071	20.1521	19.1897	16.7232	16.9452	21.8055
Seita.1G076300	0.939345	0.76139	4.96078	0.264079	1.15168	0.049833	0.186827	0.253877	0.127536	0.189275	0.074157	0.381538	3.37189	4.99835	7.32414	0.218726	0.232603	0.052242	0.035369	0.049179	1.02367	5.08903	5.4014	0.321956	0.018596	0	0	0	0	0	0.149017	1.24301	3.45052	0	0.031803	0.065886	0	0.032825	0	0.153646	0.452407	1.04597	0.113236	0.051244	0	0.114939	0.103985	0.09509	2.09158
Seita.1G076400	0	0	0.115459	0	0.067143	0.066424	0	0.585002	0.349454	0.08486	0	0	0	0	0	0.145594	0.075563	0	0	0.18417	0.180625	0	0.062426	0.182963	0.723893	0.45548	0.42764	0	0	0	0	0.16622	0	0.308612	1.13971	0.679183	0	0.24308	0	0	0.134979	0	0.071061	0.060109	0.078917	0.848264	0.444594	0.366222	0
Seita.1G076500	0	0	0	0	0	0	3.38554	2.69171	2.20284	76.8439	43.9807	65.8731	0	0	0.094246	2.56527	2.40048	1.29341	102.964	111.338	94.7017	0.118669	0	0.056291	6.90079	2.73719	3.9064	4.68365	10.717	25.7751	0	0.092129	0.081536	4.66352	3.77231	2.87373	24.6333	29.1756	31.1112	0.042642	0.050989	0	2.61319	3.62283	2.70586	208.094	165.764	174.637	0.086311
Seita.1G076600	0.095403	0.208616	0.144998	0.415159	0	0.038198	0.484704	0	0.012359	0.418071	0.244224	0.022649	0.377054	0.177792	0.259662	0.057974	0.41924	0.207289	0.03719	0.049435	0.42424	0.224591	0	0.011364	0.21915	0.218049	0	0.15455	0.553783	0	0	0	0	0.069751	0.131241	0.17385	0	0.056007	0.656032	0.150461	0.127328	0	0.167368	0.309571	0.009343	0.438748	0.17064	0.389098	0.153954
Seita.1G076700	0	0	0	0	0	0	5.52285	4.6107	11.1231	0.477003	0.56185	1.26926	0	0	0	2.50754	4.0537	3.84381	1.21754	0.79057	0.331944	0	0	0	1.57707	0.855351	4.29904	0.744217	0.360653	0.098657	0	0	0	3.0739	4.85348	2.87802	0.190064	0	0.619908	0	0	0	5.00464	6.93742	5.68073	0.711066	0.538903	0.694832	0
Seita.1G076800	0	0	0	0	0	0	1.73842	2.00827	0.800932	0.243091	0.210175	0	0	0	0	1.18868	1.53621	1.06611	0	0	0.203235	0	0	0	0.271258	0.516894	0.216064	0.103655	0.198868	0	0	0	0.190115	0.611702	0.850234	0.800565	0	0	0.239055	0	0	0	1.18957	0.958592	0.670358	0.024983	0.25348	0.062461	0.25002
Seita.1G076900	0.357363	3.55187	0.748089	2.3173	2.5724	3.36892	0.489486	0.784317	0.685239	1.39995	2.51898	2.0615	1.12425	0.60983	2.33223	0.468446	0.465041	0.855221	0.772466	0.86925	1.07608	5.3464	4.54282	0.809307	8.71868	9.07004	20.9582	1.52944	1.59437	2.99859	1.48349	2.74389	7.27922	10.9267	10.1881	10.5472	0.394169	0.807447	0.428439	3.01707	6.09455	7.08309	0.550415	0.3438	0.226403	1.20678	2.72484	1.09047	8.44295
Seita.1G077000	0.138773	0.225337	0.10623	0.111654	0.125733	0.096623	0.077546	0.052276	0.043486	0.86101	0.628255	0.600775	0	0.302722	0.173171	0.041904	0.04502	0.096189	1.61914	1.86376	1.52107	0.385277	0.376665	0	0.091688	0.29246	0.196069	0.955445	1.30131	1.02314	0.148429	0	0.16977	0.067756	0.074998	0.21644	0.3843	0.468126	0.383002	0.081036	0.020863	0.332588	0.037703	0.018328	0.012032	1.53626	1.80888	1.54886	0.117405
Seita.1G077100	1.01242	1.04537	0.877484	0.75822	1.1624	0.831455	1.647	1.19769	0.774612	8.90426	10.7062	9.92841	0.775379	0.848598	0.679725	2.25303	2.7461	2.12912	17.7922	21.5179	22.6246	0.665843	0.434886	0.732907	2.42509	2.40456	3.36952	3.28168	2.41743	3.58837	0.111483	0.460929	1.66622	3.2278	3.34053	3.81127	4.80607	4.51492	4.31025	0.485598	1.6507	2.52643	1.62214	1.58165	1.47326	23.2824	25.1174	22.0526	4.27233
Seita.1G077200	8.94213	9.58734	8.68625	24.8468	18.3841	25.7057	2.48611	1.75988	2.67964	16.2317	21.5424	14.1802	3.54592	6.14373	8.56034	2.42513	2.61789	4.15408	12.9243	10.4048	15.3014	6.89241	6.72434	9.31493	4.76704	4.94241	5.27585	40.651	35.688	21.5699	4.1144	11.2714	19.9829	5.43411	4.0586	7.41521	30.295	27.9224	31.9598	10.3757	17.0908	12.9442	1.41959	1.24007	2.01666	11.523	13.0339	14.6491	11.9977
Seita.1G077300	24.6372	25.3729	17.1685	17.9118	14.4121	17.1315	5.90248	8.45193	3.48384	11.576	13.3096	12.5725	17.6873	19.7274	11.0016	7.81743	6.77203	8.23736	17.413	17.346	14.5884	7.8232	8.69698	16.1683	12.0845	12.4546	6.62865	12.26	15.8253	9.37144	11.8518	9.84764	5.18959	9.01578	12.6012	10.8427	13.2601	19.1307	14.3904	8.52459	9.30256	7.08572	4.4958	5.48348	5.52725	14.8559	16.3184	13.1176	19.9807
Seita.1G077400	0.476952	0.493957	0.939423	0.818221	0.669436	0.581991	0.19402	0.21803	0.018518	0.017237	0.016875	0.008994	0.43922	0	0.135177	0.190853	0.183114	0.021497	0	0	0.053484	0.234035	0.027588	0.072016	0.173327	0.307803	0.210525	0	0	0.009245	0.287709	0.080932	0.366739	0.176864	0.163667	0.30891	0.13707	0.00439	0	0.344513	0.008118	0.210656	0.264777	0.230448	0.15663	0.118536	0.166115	0.100927	0.167093
Seita.1G077500	7.92918	7.04449	8.19117	10.6942	11.1605	10.5641	7.73039	5.95029	16.1186	4.82196	4.8426	8.63121	3.72323	2.73619	12.057	5.55554	7.01372	9.02574	4.50303	5.21987	4.14608	7.16117	7.88512	6.04588	5.23804	5.71099	15.345	7.5653	6.46407	12.1573	4.38508	7.97887	16.6454	10.0114	10.1593	10.3457	7.1874	7.39344	8.67738	6.32756	8.92437	7.7591	6.97942	7.05903	7.4343	4.65746	4.82346	5.16254	5.89855
Seita.1G077600	0	0	0	0	0	0	0	0	0	0	0	0.025322	0	0	0	0	0	0	0	0.027271	0	0	0	0	0	0	0	0.060841	0.062162	0	0	0	0	0.049148	0	0	0	0.053697	0	0.051706	0.056193	0	0	0	0	0	0	0	0
Seita.1G077700	0.065143	0.456279	0	0.176756	0.06426	0.06894	0	0.077269	0	0.268816	0.298685	0.536416	0.522851	0.602623	0.265239	0	0	0	0.502787	0.7597	0.233216	0.814593	0.977296	0.356507	0	0	0	0.266554	0.436691	0.057085	0	0	0	0	0	0	0.019449	0.268303	0.071262	0.075679	0.080601	0.071109	0	0	0	0.49725	0.800582	0.223585	2.07707
Seita.1G077800	112.934	92.8073	98.8067	92.3893	88.8928	75.185	20.7475	18.781	15.9995	37.82	48.8686	30.6251	137.335	137.96	90.1393	13.4255	16.2901	15.076	35.5882	32.7179	35.0889	62.9586	62.3676	98.942	15.9839	15.9696	13.9556	43.2089	47.0231	24.2392	60.6385	73.6584	61.9953	19.9308	20.8878	23.1853	26.9355	26.8977	26.2193	57.7893	109.697	94.8891	17.5188	16.4444	15.7862	32.611	38.8153	32.596	59.0011
Seita.1G077900	0.105407	0.149957	0	0.549489	0.432328	0.145522	0.078956	0.043152	0.106957	1.26044	1.37975	0.972837	0	0	0	0	0.041254	0.191344	0.349609	0.368665	0.298985	0.146091	0.16115	0	0.291772	0.291826	0.084539	1.5509	1.57973	0.81128	0.091762	0.198822	0.11251	0.072614	0	0.25135	0.786325	0.497328	0.557783	0.15912	0	0.082424	0	0	0	0.268277	0.398462	0.20082	0
Seita.1G078000	6.88812	5.85241	7.50185	8.19172	7.40925	6.4356	2.76816	2.5287	3.56147	4.04205	3.63043	3.86885	3.39166	3.15104	6.10497	2.54803	3.07458	2.60266	5.12255	4.74366	4.67593	4.76757	5.96692	4.04686	2.24531	2.41373	3.65966	5.13144	4.88314	4.34682	6.10819	4.50481	5.26769	3.5484	3.44799	4.35392	5.06835	5.65891	5.98162	4.26987	4.81957	5.98517	3.59732	2.7387	3.95917	5.09094	3.98133	4.54343	5.61614
Seita.1G078100	0	0	0	0	0	0	0	0.156915	0	0.389955	0.652765	0.953795	0	0	0	0	0	0	0.537845	0.905408	2.74789	0	0	0	0.045976	0	0	0.17903	0	0	0	0	0	0.073042	0	0	0	0.161497	0.021902	0.076587	0	0	0	0	0	1.48534	0.877009	1.33179	0
Seita.1G078200	0	0	0	0	0.064236	0.127097	3.33411	18.9082	8.89221	0	0	0.074857	0	0	0	2.37798	1.63086	2.61158	0	0	0	0	0	0	30.9028	37.5656	59.8599	0	0	0.325738	0	0.089256	0	157.532	172.272	97.6643	0.405872	0.6999	0.276518	0.06976	0.075813	0.067343	14.9331	3.09652	1.01473	0.058189	0.053327	0.106711	0
Seita.1G078300	7.09073	12.8249	10.7051	28.0755	17.332	23.5988	20.7286	21.9187	14.8437	19.3937	18.062	16.4757	9.1458	6.15817	9.68972	27.2269	25.4177	24.0953	18.8714	21.1805	18.6261	23.421	19.0434	11.8436	29.4626	31.551	18.1197	18.5817	19.6256	11.1223	15.532	12.2432	12.4477	24.3475	27.1718	20.6414	14.1581	15.4335	15.0587	10.6554	14.0306	13.5769	22.9589	23.9996	20.8601	20.6022	19.2384	18.9956	36.0154
Seita.1G078400	0.084634	0.474057	0.076936	0	0	0	0	0	0	0.745444	1.06482	1.48187	0.052188	0	0.234711	0	0	0	1.21358	1.01883	1.05658	2.04977	1.766	0	0.029414	0	0	0	0.467309	0.115098	0.537308	0.439466	0.168528	0	0	0	0.211626	0.536849	0.195195	0.589773	0	0.094917	0	0	0	1.00153	2.53569	0.671926	4.50449
Seita.1G078500	10.8402	18.0837	2.92885	3.82266	5.87241	4.55332	0	0.021925	0	2.3111	1.12133	3.16969	6.41796	8.91167	5.24804	0	0	0	1.54841	2.82704	1.88468	16.3611	11.6663	2.47844	0	0	0	0.202141	0.203277	0.050331	4.62446	1.53164	0.729715	0	0	0	0.319932	0.735088	0.021351	1.58319	2.056	2.16918	0	0	0	2.38157	4.26414	2.67241	19.4716
Seita.1G078600	21.5762	13.2787	13.6817	28.0968	15.4522	17.6994	0	0	0	1.94481	1.68158	2.26475	3.00765	2.26355	2.72566	0	0	0	0.94619	0.759659	1.35452	0.59381	1.61062	4.32571	0	0	0	1.73972	1.75257	1.30219	0.016503	0.190958	0.742577	0	0	0	0.155972	0.430051	0.090076	0.306225	4.92105	2.14712	0.055009	0.024811	0	1.37956	1.17399	1.82972	0.657824
Seita.1G078700	1.66738	1.52279	1.56574	1.73477	2.96295	1.66838	0.402146	0.57357	0.661014	2.18428	1.6359	1.40864	0.261017	0.99521	1.3181	0.493185	0.239062	0.820712	0.750112	0.477023	0.509394	0.664603	0.706375	1.02138	0.733511	0.807858	0.83102	3.58941	1.53337	0.820648	0.288204	0.483052	1.98989	1.29343	1.12595	0.681768	2.61892	2.92523	2.65838	0.829489	2.05202	3.27974	0.489036	0.465576	0.584575	0.969634	0.650111	0.736917	0.894986
Seita.1G078800	152.847	133.421	138.519	167.335	199.54	174.323	75.1358	99.9217	95.5984	266.563	288.146	250.724	179.244	226.896	187.599	69.0249	70.2597	61.7241	125.946	103.262	103.377	148.637	146.24	201.613	137.742	134.655	121.054	250.278	170.802	164.024	269.652	187.436	187.921	102.508	84.4908	88.8611	180.125	163.488	169.747	251.746	214.815	199.037	28.5085	51.8601	50.4251	131.539	117.982	66.6217	89.6371
Seita.1G078900	375.653	326.312	339.208	441.284	484.085	451.922	62.4976	36.8314	59.3785	57.1121	44.1223	95.6661	36.5128	81.7645	89.1031	35.258	41.8876	34.8141	57.759	66.6975	59.5748	33.592	52.7612	83.1286	55.9311	65.0223	86.0623	47.6739	33.7666	69.7899	91.7327	77.2273	96.0868	53.54	73.1774	64.1092	85.7492	85.5417	94.8428	87.9292	97.5591	93.5144	143.408	122.692	45.8011	51.8599	41.289	69.6948	68.5839
Seita.1G079000	10.5695	10.4421	12.0612	4.1732	13.0544	3.10903	0.495274	0.846661	1.12044	3.1045	4.70108	4.78238	10.2907	6.76616	16.2772	0.397247	0.761386	0.62216	1.16592	1.5576	0.875294	9.42077	12.7702	3.85548	0.279527	0.728923	0.327417	0.946853	0.18895	0.399146	6.05413	1.82972	1.29006	0.139475	0.154546	0.026342	0.374063	0.348157	0.277725	0.917866	2.303	2.49721	2.75628	1.73512	0.71252	1.60467	1.86109	1.84839	7.3745
Seita.1G079100	0.018642	0	0	0	0	0	0	0.135858	0	0	0.088274	0	0.054562	0.05193	0.015567	0	0	0	0	0	0.057508	0.006588	0.011775	0	0.026996	0.037898	0.081898	0.063664	0.079718	0.057941	0.33441	0.189354	0.033161	0.060838	0	0.088407	0	0	0	0	0.090721	0.011326	0	0	0	0	0	0	0
Seita.1G079200	39.6439	37.2655	51.8878	40.7665	44.1135	39.6172	32.6387	28.9147	36.2518	38.1983	34.3967	39.2818	38.0037	24.2869	43.9905	31.6156	36.6897	30.2419	30.5907	27.8491	27.3924	49.9137	55.9947	30.599	33.783	33.8244	39.0076	46.0249	48.4016	31.2683	115.49	48.3048	48.6452	38.8005	38.2642	42.1135	34.7292	40.0497	36.0291	58.3352	36.9313	49.6553	27.028	27.755	30.9883	30.2396	27.0774	28.4539	37.2344
Seita.1G079300	2.24845	1.97334	2.55146	3.28007	2.70616	2.92325	1.52343	1.66688	1.33502	2.89684	2.64966	2.54483	1.86734	2.0312	2.19129	2.44057	1.55	2.00027	2.58921	2.06988	1.96555	2.27166	3.46228	1.93862	2.50386	1.90856	2.52282	3.28824	4.18697	2.3872	1.34187	2.48523	2.09444	2.83684	2.77226	2.73342	3.37022	2.96413	3.13219	2.27747	2.0263	2.11743	2.07223	1.76344	2.25182	2.0511	2.48377	2.22345	1.58111
Seita.1G079400	5.10578	5.26535	6.06495	6.33984	6.62079	5.64181	3.7293	3.03645	3.09094	5.49534	4.89333	4.74845	4.15794	4.1447	5.66063	3.64376	3.51708	4.44053	5.38726	5.21993	4.49591	4.48881	4.46852	4.88338	3.21225	2.98552	3.81448	5.39644	5.625	3.8824	4.61491	4.2347	3.71987	4.52015	3.57648	4.63318	6.33323	6.56066	6.84072	3.76218	4.80126	4.99701	4.40584	4.04554	3.97206	5.62185	5.13035	5.24864	5.97666
Seita.1G079500	5.59907	3.59932	2.7474	1.88701	1.02014	1.04893	1.19842	0.896883	0.730721	32.5869	40.2827	21.2558	4.24067	3.60017	6.71235	0.541473	1.00863	0.46498	33.5101	40.8327	38.9293	6.72477	3.57754	2.3877	1.03821	0.976652	0.677215	16.5518	13.8534	4.08101	0.701097	25.9042	10.8621	0.365313	0.339206	0.507859	9.04688	20.6303	7.40689	0.595486	5.70469	1.22944	0	0	0	0.000917	0	0	0.158756
Seita.1G079600	1.53724	0.239395	0.165703	0.320802	0.133819	0.129719	0.61946	0.32213	0.400359	0.029485	0	0.033116	0	0	0.278494	0.300644	0.332754	0.16071	0	0	0	0.029795	0.05858	0.039427	0.192865	0.24591	0.392933	0.006116	0	0.065566	0	0	0.062807	0.284787	0.030881	0.261368	0.039928	0	0	0	0.040186	0.060714	0.733258	0.305591	0.487411	0	0.07296	0	0
Seita.1G079700	64.676	67.0723	47.3926	47.8605	73.1906	95.4016	40.7774	277.007	40.1456	1.06819	1.21452	0.737773	1.72819	1.2695	2.47274	28.556	219.567	70.1892	28.4838	20.5524	21.5472	27.3381	19.3737	33.7127	99.2258	29.488	18.8068	1.66606	2.32836	0.806056	1.11716	20.0903	9.27619	146.301	39.549	147.175	13.3464	50.5737	15.5069	55.3261	70.1699	22.6824	0	0	0	0	0	0	0
Seita.1G079800	0	0	0	0	0.021933	0	0	0	0	1.4875	1.16468	1.25698	0	0	0.02223	0	0	0	0.715822	0.497733	0.628462	0.069861	0.109445	0	0	0	0	2.24195	2.22447	1.52735	0	0.02945	0.105794	0	0	0	0.611202	0.612591	0.2966	0.046035	0	0.04444	0	0	0	0.844255	1.07753	0.514304	0
Seita.1G079900	17.0272	16.2336	22.4996	12.4565	18.7061	15.5889	18.3492	14.962	21.2564	43.328	33.8721	41.5627	12.4784	14.7463	17.5441	14.567	12.8705	18.0972	31.8731	39.674	39.9132	27.1911	28.3973	12.6622	11.7636	14.5706	24.7664	44.9819	45.2615	61.9284	11.8766	18.7273	31.7848	29.0456	30.5082	23.6913	52.9313	52.4476	51.1658	21.5402	17.1575	23.605	22.6075	21.0396	15.404	36.6412	33.6336	39.5193	23.6988
Seita.1G080000	0.105182	0.094702	0	0	0.038048	0.050725	0	0	0.078276	0	0.075217	0.566921	0	0	0	0	0	0	0	0.574149	0.397614	0	0	0	0	0	0	0.22742	0.016829	0	0	0	0	0	0	0	0.607379	0	0	0	0	0	0	0	0	0	0	0	0
Seita.1G080100	5.88396	6.86919	8.24468	6.20428	7.94466	6.98461	4.06753	3.17802	6.44029	4.16202	4.0522	6.04883	4.77309	3.6397	7.82698	4.22497	4.33362	4.58876	5.32764	5.13014	5.11953	6.11348	6.97769	4.41543	4.25989	4.21771	6.47776	4.77977	5.75089	6.7837	6.9705	6.03722	8.45198	6.18744	6.54459	7.05428	6.26651	6.45879	7.14143	6.83882	5.36979	6.77014	5.90717	4.54908	5.52241	5.52596	4.83458	5.49576	5.47688
Seita.1G080200	3.07348	3.5545	3.42052	7.1503	4.54013	5.02492	6.27141	5.28015	3.94326	4.55022	4.12835	3.48703	2.65116	1.76275	3.38737	5.63156	5.90044	5.78571	5.20791	5.3268	4.43732	7.53441	5.7232	3.46346	10.054	9.12134	5.91763	5.46889	5.01349	3.54805	2.99784	3.3408	3.82587	6.31648	8.12326	7.21958	4.31321	6.02571	5.33556	2.85502	3.84407	3.43525	3.89967	3.99179	4.97313	4.40941	5.10762	4.595	6.12225
Seita.1G080300	0	0	0	0	0	0	0	0	0	0	0.840197	0	0	0	0	0	0	0	0	0	0.298248	0	0	0	0	0	0	0	0	0	0	0	0	0	0	0	0	0.13419	0	0	0	0	0	0	0	0.117406	0.084988	0	0
Seita.1G080400	0	0	0	0	0.094137	0	0	0	0	40.1648	32.83	16.0333	0.165891	0.228637	0.176315	0	0	0	37.9387	34.9657	41.7851	0	0.096217	0	0	0	0	2.08822	2.1859	1.53468	0	0	0	0	0	0	5.59643	11.6151	1.24739	0	0	0	0	0.0366	0	38.3389	26.7624	27.8684	0.130867
Seita.1G080500	21.0857	19.5011	16.9041	26.2124	21.4221	22.976	5.66396	4.40688	4.47307	23.1218	24.443	8.34444	28.2701	25.8886	20.7814	1.85592	6.87652	7.08959	13.0078	10.988	9.07699	16.497	17.1605	25.6729	8.15329	9.23785	6.46038	27.403	11.1371	4.97366	11.9197	14.5469	4.80952	7.2066	3.52264	8.39314	20.9965	8.98339	23.3897	17.5854	23.8105	19.3704	5.97627	4.86027	5.25216	9.12909	10.3663	8.36936	13.5007
Seita.1G080600	0	0	0.274847	3.87372	1.31638	5.45458	0	0	0.020365	1.63957	0.569352	5.45226	0.218604	0	0.501749	0	0.04765	0	0	0.203065	0	0.143664	0	0	0.448119	0.261855	0	36.867	31.9612	74.6109	38.2167	44.5023	31.4056	0.109626	0	0	34.6336	26.7375	32.4364	10.8474	1.67742	6.24553	0.05226	0	0.03105	0.742724	0.313412	0.038749	0.114146
Seita.1G080700	9.5177	10.7235	12.0113	10.3854	15.5984	10.8535	7.93829	5.77091	4.57123	6.46462	7.04038	7.57406	9.48298	11.7535	13.2581	8.68032	8.01106	6.42478	5.49657	5.52989	4.93966	15.7998	16.9693	14.7562	8.64992	10.2462	10.9303	8.40237	9.16342	8.47648	6.44536	16.1235	15.0956	4.3712	7.85504	8.53032	6.31734	6.33536	6.83803	11.5177	11.3215	10.7695	5.49831	6.49175	6.87925	5.58251	5.51689	3.17588	10.768
Seita.1G080800	24.1066	23.8513	25.7654	27.92	25.3522	29.9516	18.2754	20.4322	14.138	28.1674	30.8954	21.4911	22.7649	24.9137	22.1686	17.4101	17.4995	15.0317	24.8124	27.9605	22.4834	28.4616	25.8044	30.6339	28.2065	26.6717	18.1284	32.7949	30.4915	23.5788	21.4779	25.8025	23.5401	26.9989	28.4144	25.5573	31.8612	32.7499	30.9896	25.0478	38.8253	30.4409	13.9375	15.542	14.4706	21.6145	23.8017	28.4556	15.0162
Seita.1G080900	1000.55	752.766	592.378	421.002	462.178	490.406	0.533482	0.508525	0.098834	103.238	97.5923	103.986	467.463	960.094	375.253	0.31537	0.237247	1.5204	69.4161	60.9524	78.253	268.444	293.421	955.8	11.7601	16.6373	11.6556	149.119	103.394	65.3531	20.1209	124.573	65.6188	4.77639	4.77879	9.88085	29.7175	29.6139	28.867	92.8177	533.052	268.207	0.9827	0.776707	0.369164	67.8238	84.6137	80.3748	318.899
Seita.1G081000	4.55398	5.40241	5.97747	7.56713	5.80332	6.27176	8.84184	5.86637	4.71528	5.99679	8.3794	4.29191	4.79546	3.38731	5.9391	10.2203	10.5631	7.76509	5.0104	5.79667	4.61937	11.6747	9.57424	6.83269	11.8859	11.4318	5.78539	6.15608	7.80812	3.23433	5.35167	4.38522	3.14408	7.76248	9.19742	10.7634	5.39537	5.43004	5.94984	2.82056	4.84228	4.54098	6.18946	6.92957	7.79194	4.98386	4.62277	5.02665	9.26873
Seita.1G081100	15.9811	22.5846	12.5404	17.3832	14.1781	15.7988	2.28215	2.99413	2.33335	2.61299	2.6045	1.82661	12.2142	17.0505	18.4293	1.83971	1.4209	1.76003	16.288	16.114	16.6924	18.1911	14.7387	22.1311	7.28808	8.50027	9.83245	2.72819	2.79086	2.30366	14.0027	9.51761	10.1322	14.6868	8.39082	13.3777	5.19259	4.08242	5.17434	9.07885	18.7346	12.8792	1.49643	1.37918	1.42055	8.7518	8.19935	10.149	36.9414
Seita.1G081200	26.2216	28.305	25.3263	57.9771	33.4465	54.488	16.4633	14.2163	12.1399	25.8306	23.452	22.2562	8.23836	6.82114	10.9385	21.0934	22.5262	22.8733	30.5518	27.0717	26.3479	31.7497	35.4864	25.9017	34.3445	28.0351	21.8199	29.7687	26.7481	23.8131	17.3321	14.1829	9.38156	34.5141	32.5997	40.6649	36.7112	38.3967	38.4217	36.3566	35.0447	31.4579	15.374	15.2772	17.6247	25.3606	26.3154	26.6248	31.6852
Seita.1G081300	0.313954	2.36093	0.394344	0.730665	1.0436	0.684519	0.367961	0.281475	0.182747	0.84778	0.471701	0.728729	0.799278	0.602908	0.58657	0.199305	0.240419	0.248276	2.01782	1.30089	0.79945	5.90316	4.40496	0.543834	0.948352	0.978915	0.800516	0.182458	0.253171	0.124095	2.11681	1.94304	2.34223	0.671484	0.818623	0.619751	0.25765	0.75757	0.242001	0.898678	0.335905	0.55165	0.160634	0.366921	0.308681	2.03532	3.48982	2.54572	4.8945
Seita.1G081400	24.3936	26.7972	27.6154	20.2304	29.4268	25.0653	29.8411	31.5161	27.0688	86.1582	84.8642	69.2257	42.0692	50.4112	34.0465	17.5935	18.0564	25.616	81.8009	91.5218	121.248	35.4838	34.7191	28.7203	33.2068	29.124	48.3518	74.6037	80.3059	112.581	16.9379	56.1733	63.279	57.643	50.5558	52.7945	67.3019	63.4333	64.337	45.1719	43.2234	56.2421	18.3126	23.3328	15.1523	64.9332	75.4043	78.6324	41.8194
Seita.1G081500	0	0	0	0	0	0	0	0	0	0	0	0	0	0	0	0	0	0	0	0	0	0	0	0	0	0	0	0	0.101007	0.114579	0	0	0	0	0	0	0	0	0.037034	0	0	0	0	0	0	0	0	0.026454	0
Seita.1G081600	0	0	0	0	0	0	0	0	0	0	0	0	0	0	0	0	0	0	0	0	0	0	0	0	0	0	0	0	0	0	0	0	0	0	0	0	0	0	0	0	0	0	0	0	0	0	0	0	0.023261
Seita.1G081700	1.52752	1.26984	1.32704	1.41278	1.92388	1.84503	1.03862	0.79657	0.620736	1.1806	1.10056	0.883172	1.86325	2.13303	1.6958	1.09732	0.44778	0.464401	0.681128	0.589627	0.610558	1.69643	2.02055	1.79239	1.86532	1.8359	0.991456	1.48495	1.92534	0.904384	2.38618	1.62862	1.50256	0.868036	1.11471	0.833409	0.50466	0.619306	0.875832	1.08537	1.64167	0.899258	0.869224	0.583331	0.821175	0.477231	0.640287	0.551493	1.08899
Seita.1G081800	7.77581	7.73239	6.79729	8.72582	8.38071	8.57163	4.14419	4.23112	3.05692	5.88327	7.82107	5.70341	8.30149	8.76436	5.45747	6.34982	6.15951	4.97702	9.37933	7.24836	7.90089	7.83894	7.97115	9.72542	6.99334	5.73896	4.56076	4.96543	5.94182	3.86535	4.96895	5.27288	3.76254	6.41793	5.91199	7.21799	6.8683	6.65892	6.59358	5.55024	6.89869	7.43183	5.32845	4.77819	5.09412	8.39311	8.60039	7.47672	7.99165
Seita.1G081900	0	0	0	0	0	0	0	0	0	0	0	0	0	0	0	0	0	0	0	0	0	0	0	0	0	0	0	0	0	0	0	0	0	0	0	0	0	0	0	0	0	0.034155	0	0	0	0	0	0	0
Seita.1G082000	3.17056	3.32954	2.87469	5.21841	6.12631	5.29877	14.3467	15.944	14.0895	1.84823	1.00393	1.26784	1.53363	1.4229	1.85466	22.3216	19.697	19.1063	1.53241	1.29697	1.6779	1.29926	1.74921	1.96037	14.6924	15.2001	15.1837	1.1004	1.33277	1.1663	1.47229	1.00021	3.15772	18.457	22.2218	19.5258	1.35459	0.992783	1.32354	1.2168	2.53262	2.89897	20.105	19.6624	23.3609	0.712582	1.04377	1.18784	2.64362
Seita.1G082100	0.007954	0	0.017341	0.146775	0	0.194631	0.181212	0.370689	0.296785	11.7402	9.96198	2.51013	0.015301	0	0.044467	0.405429	0.092156	0.399281	10.4824	7.28531	5.47125	0	0.049013	0	0.552259	0.343043	0.562988	2.26705	4.69209	1.24556	0.050829	0	0.02672	0.454489	0.472995	0.235391	2.75338	1.73209	3.66622	0	0	0	0.068084	0	0.110961	10.18	8.69007	11.3847	0.046471
Seita.1G082200	0	0.174612	0.038917	0.231668	0.073978	0.244114	0.489266	2.08415	0.380495	3.59902	2.61164	3.32764	0	0	0.153143	0.42534	0.688192	0.432346	2.60972	2.80608	2.75694	0	0.136257	0.1595	1.25482	0.719599	0.974855	1.53555	1.2194	3.40695	0	0	0.201029	0.614944	0.614379	0.889046	5.02254	2.99645	4.35293	0	0	0	0.312912	0.170798	0.361533	1.45578	2.07071	2.41059	0
Seita.1G082300	0	0	0	0	0	0	0	0	0	0.62705	0.707233	0.439914	0	0	0	0	0.034135	0	0.440058	0.148671	0.524562	0	0	0	0.028942	0	0	0.217176	0.114527	0.107607	0	0	0	0	0	0	0.55865	0.477631	0.706324	0	0	0	0	0	0	0.332429	0.200321	0.517128	0
Seita.1G082400	0.017378	0	0.063937	0.029696	0.324279	0.027587	0.353857	0.06184	0.188816	0.47846	0.28532	0.432122	0	0	0	0.448614	0.227604	0.259968	0.364597	0.102293	0.263353	0	0	0	0.012079	0.036129	0.247773	0.095024	0.088754	0.123772	0.005516	0.077494	0.028998	0.143033	0.134071	0.155066	0.355345	0.148898	0.474942	0	0	0	0.018388	0	0.007944	0.157644	0.115004	0.095842	0
Seita.1G082500	0	0	0	0	0	0	0.097424	0.493888	0.344468	0.023867	0.050121	0.025065	0	0	0	0.104753	0.013572	0.157487	0.086255	0.03663	0.023584	0	0	0	0.609502	0.454038	0.979374	0.055249	0.058993	0.027436	0.067681	0	0.054043	1.39712	0.684329	0.100528	0.200361	0.17807	0.25704	0	0	0	0.145002	0.019385	0.026469	0.058846	0	0.010612	0
Seita.1G082600	0.101573	0.059561	0.226663	0.173789	0.162001	0.214322	0.046766	0.017211	0.045519	1.61985	1.24647	1.09923	0.03579	0.0454	0.048842	0.40533	0.242448	0.132097	1.41355	0.887899	0.6954	0	0	0	0.240848	0.126698	0.074625	1.57794	1.03723	1.22804	0.078302	0.102522	0.149666	0.364639	0.258732	0.172772	3.65192	2.84777	3.75078	0.016857	0.01832	0	0.015047	0	0	0.904504	0.578721	1.04654	0.002068
Seita.1G082700	1.03763	0.685191	1.24857	1.8046	1.35016	1.5571	0.419883	0.132521	0.143478	0.028107	0.027973	0	0.663378	0.611264	1.2538	0.130296	0.671364	0.927457	0.042371	0.014672	0.144435	2.24476	2.58442	0.904696	0.344778	0.844844	0.316302	0.283676	0.305121	0	1.99113	1.13028	1.08704	0.216891	0.763022	0.752059	0.391155	0.17701	0.16355	1.65768	1.82184	2.21853	0.690187	0.43785	0.196166	0.093976	0.029112	0.060929	1.22702
Seita.1G082800	0.63196	0.423861	0.74129	1.28493	0.798653	0.893534	0.057586	0.067195	0.057855	0.701547	0.844875	0.465815	0.087514	0.050631	0.51221	0.103295	0.233052	0.12791	0.61874	0.364239	0.474755	0.374735	0.534224	0.131301	0.06862	0.038348	0.158616	0.367725	0.201551	0.215291	0.175154	0.192046	0.775242	0.182768	0.37829	0.317359	0.477734	0.391584	0.508408	0.546665	0.460423	0.637332	0.126193	0.131601	0.123129	0.12122	0.200765	0.250974	0.676594
Seita.1G082900	1.6146	1.62534	1.50843	1.01104	1.25253	2.36671	0.998123	0.825119	1.01226	1.511	1.58405	1.13842	1.75323	1.68371	1.41537	1.50298	1.55333	1.26986	1.61584	1.44336	1.14778	1.91884	2.2312	1.74165	1.11296	1.37726	1.44779	1.86122	1.69685	0.966378	1.18993	1.24085	1.3616	1.55819	1.34762	1.31372	0.958843	1.83296	1.96168	1.56076	1.91001	1.25179	1.07254	0.824496	1.14067	1.11865	1.03494	1.13016	1.53686
Seita.1G083000	4.02536	3.19274	3.93904	3.51095	4.30909	3.60321	3.65483	3.05382	2.42581	2.77763	2.2113	1.51753	2.96941	2.41665	3.24821	4.19901	3.49244	4.07998	2.55505	1.59946	1.8776	4.05888	4.91338	3.50263	2.46564	3.16051	2.66947	3.00538	3.5526	1.66725	3.50752	3.05529	2.0354	4.57395	4.27106	4.09424	3.65194	3.76718	3.99375	3.40064	3.38194	3.39284	2.97983	4.10036	3.02713	1.79562	1.72938	1.72993	4.12416
Seita.1G083100	1.63678	1.47488	1.9353	2.41227	1.84171	2.16931	1.17897	0.922917	0.863313	1.14628	1.87942	0.695913	1.49105	1.14094	1.43464	2.30144	2.56682	1.5985	1.80663	2.72104	1.70177	1.5466	2.95832	2.07976	1.53991	2.49664	1.76847	1.90816	1.76928	0.844835	0.655144	1.56896	1.30637	2.37041	2.99436	2.08037	2.27576	3.37899	3.09192	3.96826	3.7173	3.47711	1.44055	1.52999	0.890409	2.11636	1.20345	2.01531	2.62408
Seita.1G083200	0	0	0	0	0	0	0	0	0	0	0.166518	0.09571	0	0	0.359072	0	0	0	0	0	0	0	0.04258	0.051023	0	0	0	0.052475	0	0	0	0	0	0.04239	0.018405	0	0.09551	0	0.088682	0.044596	0.048466	0.064578	0	0	0	0.145449	0	0.06458	0
Seita.1G083300	0.107928	0.059916	0	0	0	0	0	0	0	0.028975	0	0	0.313	0.268654	0.652022	0.15337	0.024781	0.008701	0.106814	0.167674	0.275314	0.072368	0.411045	0.148099	0	0	0	0	0.123557	0.025036	0	0	0	0.089658	0.160545	0	0.374912	0.267249	0.26591	0	0.147433	0.248916	0.054292	0	0.046717	0.095252	0.186108	0.202803	0.079283
Seita.1G083400	0	0	0	0	0	0	0	0	0	0.08762	0	0	0	0	0.060788	0	0	0	0.130419	0.067289	0.052673	0	0	0	0	0	0	0.007006	0	0	0	0	0	0	0	0	0	0.06737	0	0	0	0	0	0	0.003222	0.05321	0	0.04879	0
Seita.1G083500	7.02169	8.36609	9.43303	11.2383	10.4285	11.6908	6.69019	5.84001	7.81231	8.78824	7.84328	8.23738	4.74974	5.65975	9.2217	7.066	8.46761	8.00637	7.83028	7.51687	8.17909	11.8662	11.4851	8.19321	7.86599	9.0417	10.0956	9.97015	10.3739	7.51933	20.4043	10.2139	11.1968	7.10503	6.66176	7.35855	9.58591	10.1359	9.15361	10.7756	8.06484	9.5414	7.90629	6.74675	8.17041	8.49625	7.6376	8.08466	10.6071
Seita.1G083600	0	0	0	0	0	0	0	0	0	0	0	0	0	0	0	0	0	0	0	0	0	0	0	0	0	0	0	0	0	0	0	0	0	0	0	0	0	0	0	0	0	0	0	0	0	0	0	0	0
Seita.1G083700	0	0	0	0	0	0	0	0	0	0	0	0	0	0	0	0	0	0	0	0	0	0	0	0	0	0	0	0	0	0	0	0	0	0	0	0	0	0	0	0	0	0	0	0	0	0	0	0	0
Seita.1G083900	0.407706	0.283879	0.399593	0.584975	0.246154	0.379949	0.927261	0.411907	0.708811	0.410035	0.364378	0.238129	0.123951	0.147092	0.082433	0	0	0	0	0	0	0	0	0	0.326281	0.657222	0.627347	0.331022	0.397042	0.367401	0	0.043245	0.037792	0	0	0	0	0	0	0	0	0	0	0	0	0	0	0	0
Seita.1G084000	1.39392	0.80251	1.33823	2.30407	1.21543	1.98886	1.5444	1.53132	1.03053	1.20616	1.1823	0.640602	0.804804	0.932902	1.2811	0.406048	0.603434	0.871382	0.314984	0.597338	0.152201	2.26629	1.57593	1.53807	2.96628	2.2109	0.844178	1.47415	1.45221	0.73902	2.32964	2.49448	1.88517	0.572788	0.41188	1.20584	0.975798	0.932358	0.45711	0.921195	1.29711	0.646874	0.524194	0.35244	0.198362	0.196599	0.547064	0.690944	0.998756
Seita.1G084100	0.027182	0.050386	0.021931	0.108525	0.116306	0.04364	0	0	0	0.088164	0	0	0	0	0	0	0	0	0	0	0	0	0	0	0.071961	0.027854	0.026511	0	0.034811	0	0.015823	0.03606	0.016192	0	0	0	0	0	0	0	0	0	0.011096	0	0	0.037413	0	0	0
Seita.1G084200	0.430149	0.258865	0.248902	0.932709	1.12243	0.724445	0.110766	0.097511	0.136376	0	0.028578	0	0	0.021098	0.112675	0	0	0	0	0.050539	0.012013	0	0	0	0.057332	0.119691	0.733934	0.060699	0.230115	0.003439	0.246639	0.086129	0.22673	0	0	0.025391	0.025653	0.064852	0.047638	0	0	0.023126	0	0	0	0.059947	0.107739	0	0
Seita.1G084300	0	0	0	0	0	0	1.6741	1.4097	1.33717	0.07331	0.032521	0.037435	0.381324	0.264774	0.349573	0	0	0	0	0	0.060679	0.05491	0	0.034077	3.72992	3.85115	2.8027	0.109308	0.388524	0.011706	0.815435	0.117075	0.308969	0.001945	0	0.031009	0.032166	0.086618	0.105067	0.018058	0	0.024083	0.024835	0	0	0	0.043689	0.02582	0
Seita.1G084400	0	0	0.120841	0	0.060464	0	0	0	0	0	0	0	0.02308	0.035993	0.062995	0	0	0	0	0.022857	0	0.079719	0.062695	0	0.026191	0	0	0	0	0	0	0.05601	0	0	0.022396	0	0	0	0	0	0	0	0	0	0	0.018257	0	0.016741	0
Seita.1G084500	0.201592	0.347869	0.205315	0.550585	0.553767	0.448752	0.38374	0.204456	0.239787	0.200862	0.127706	0.117004	0.097987	0.130441	0.166952	0.417354	0.172723	0.28287	0.136156	0.126842	0.059882	0.607861	0.393669	0.242884	0.37401	0.264425	0.321461	0.272508	0.43495	0.198156	0.550289	0.627963	0.626601	0.490847	0.658624	0.634782	0.184226	0.395791	0.318227	0.758583	0.354335	0.276297	0.186782	0.133242	0.235855	0.180551	0.253595	0.215586	0.331275
Seita.1G084600	0.368628	0.346543	0.784761	0.695764	0.543681	0.572733	0.159973	0.119482	0.143555	0.035751	0.129796	0.050735	0.083013	0.115247	0.129048	0.781738	1.02126	0.720541	0.736991	0.867054	0.562392	1.23285	1.25155	1.00418	0.238755	0.466957	0.262801	0.306251	0.155651	0.119151	0.228081	0.284532	0.153985	1.20148	0.902822	1.44524	1.0413	1.09312	0.720534	1.34784	1.35207	1.43596	0.878624	0.57532	0.608866	0.873025	0.723846	1.01586	1.18931
Seita.1G084700	0	0	0	0.064552	0.022302	0.033735	1.24446	1.58155	1.79544	0	0	0	0	0	0	0.771427	0.584944	0.561036	0	0	0	0	0	0	4.60443	5.07899	2.44046	0	0.043003	0	0	0	0	2.91049	3.28266	3.0403	0	0.053559	0	0	0	0	0.573463	0.435229	0.941773	0	0	0	0
Seita.1G084800	0	0.144001	0.030159	0	0	0	0.341354	0.595141	0.266666	0	0	0	0.211362	0	0.024072	0.828161	1.10984	1.32563	0.065611	0.107638	0	0.578967	0.473097	1.22198	4.76757	2.80979	1.47685	0.021116	0.023491	0.015873	0.178231	0.045967	0	5.12441	5.18361	6.06381	0.196075	0.41351	0.090255	0.053758	0.064645	0.405279	0.349282	0.332225	0.427352	0.04158	0.051591	0.023359	0.169462
Seita.1G084900	0.046176	0.039647	0.083765	0.012187	0.02036	0	0.374659	0.463311	0.290329	0.229255	0.234329	0.081371	0	0.005777	0.034259	1.22606	1.50192	1.26351	0.09715	0.260355	0.117186	0.01448	0.030754	0.062528	0.050835	0.12651	0.235894	0.039026	0	0	0	0	0.019055	0.615904	0.439436	0.417877	0	0.011676	0.021984	0	0	0	0.281463	0.111158	0.180106	0.113733	0.210657	0.117269	0
Seita.1G085000	0	0	0	0	0	0	0	0	0	0	0	0	0	0	0	0	0	0	0.016098	0	0	0.066056	0	0	0	0	0	0	0	0	0	0	0	0	0	0	0	0	0	0	0	0	0	0	0	0	0	0	0
Seita.1G085100	0.345066	0.145396	0.209053	0.154879	0.080918	0.140785	0	0.028285	0.057839	0.241407	0.186889	0.350564	0.006291	0	0.092247	0.015503	0	0.031042	0.380681	0.548488	0.321727	0.034987	0.117065	0.487384	0	0	0.050144	0.016299	0.180291	0.028235	0	0	0.015916	0.003628	0.028346	0	0.022934	0.034133	0	0	0	0	0	0	0.028583	0.397682	0.370346	0.388653	0
Seita.1G085200	0	0	0	0	0	0	0	0	0	0.216814	0.623572	0.1718	0	0	0	0	0	0	0.274665	0.256989	0.26504	0	0.252328	0.233514	0	0	0	0	0	0	0	0	0	0	0	0	0.212244	0.124599	0	0	0	0	0	0	0	0.18015	0.276238	0.401436	0
Seita.1G085300	0.24411	0.157593	0.162049	0.155566	0.202771	1.03278	0.351594	0.334739	0.357764	1.23302	0.563026	0.633964	0.12063	0.243957	0.481775	0.368092	0.280922	0.125548	4.61162	5.57967	4.25111	0.345698	0.382305	0.338341	0.420141	0.28952	0.391584	0.371838	0.382716	0.194437	0.384536	0.716046	0.694732	0.257627	0.30919	0.356234	0.769818	0.633768	1.08096	0.257313	0.236498	0.405736	0.112478	0.169692	0.214302	4.32237	4.10188	2.58391	0.43977
Seita.1G085400	0.101088	0.055925	0.075168	0.32679	0.296748	0.157633	0.049906	0.048523	0.01323	0.575756	0.666399	0.248879	0.100901	0.0521	0.115717	0.034869	0.072106	0	0.334872	0.237953	0.207117	0.056607	0.075626	0.018246	0.08467	0.022679	0.036436	0.111841	0.213938	0.024726	0.017314	0.18181	0.181664	0.029865	0.064837	0.008395	0.111449	0.098708	0.121701	0.031683	0.051648	0.015293	0	0.013059	0.03429	0.281057	0.289018	0.357589	0.05515
Seita.1G085500	0.490959	0.370568	0.377278	0.540295	0.352054	0.393664	0.111518	0.063907	0.013068	0.766342	0.565708	0.228991	0.049834	0.085487	0.380296	0.446481	0.404412	0.576805	0.796058	0.659194	0.639547	0.825944	0.744284	0.216277	0.046	0.044729	0.161103	0.302823	0.77864	0.266168	0.203687	0.270017	0.522032	0.394107	0.496191	0.486719	0.397008	0.38417	0.332897	0.176508	0.357232	0.428905	0.31345	0.167475	0.273171	0.860236	0.451715	0.683103	1.11645
Seita.1G085600	0.266708	0.434354	0.26243	0.294348	0.176546	0.282924	0.071608	0.062651	0.239304	0.293378	0.156269	0.24275	0.084204	0.119387	0.322813	0.01758	0	0.0176	0.02681	0.133099	0.51904	0	0	0	0.197661	0.177715	0.32803	0.315302	0.193553	0.160459	0.143228	0.325452	0.243471	0	0	0	0	0	0	0	0	0	0.014306	0	0	0.278322	0.12291	0.103315	0
Seita.1G085700	0.037637	0.079816	0.046234	0	0.013421	0	0.131411	0.104118	0.152109	0.250241	0.256746	0.471239	0.015472	0.063061	0.041995	0.081346	0.152898	0.040829	0.219588	0.061496	0.342355	0.136367	0.114412	0	0.046915	0.139659	0.187808	0.051449	0.017522	0.057062	0.015929	0.055944	0.050075	0.049043	0.06711	0.015448	0	0.092356	0.072457	0.050866	0.031574	0.01407	0.059736	0.077855	0.078871	0.601037	0.576127	0.23406	0.239205
Seita.1G085800	0.013597	0.10551	0.075038	0.031188	0.049309	0	0.516916	0.384927	0.437548	0.032065	0.037625	0.074628	0	0.017317	0.158206	0.598933	0.645436	0.430972	0.281611	0.149908	0.124465	0.767873	0.610327	0	0.714498	0.817124	0.725606	0	0	0.037107	0.223718	0.201975	0.235842	0.473121	0.30667	0.487092	0.03383	0.133461	0	0.150013	0	0.030498	0.424137	0.468345	0.376574	0.249864	0.146915	0.176594	0.675104
Seita.1G085900	2.2759	3.64869	2.58557	1.54893	2.43859	0.882155	0.322452	0.510887	0.404376	0.398158	0.57785	0.436175	2.65974	2.74305	2.33769	0.44444	0.12311	0.53271	0.393559	0.461186	0.486638	1.13182	3.25319	2.42831	0.543539	0.815272	0.438093	0.577864	0.39021	0.412642	5.02513	1.57738	1.21912	0.095082	0.068178	0.221658	0.107472	0.442865	0.074625	0.64571	1.64178	0.989416	0.340661	0.345141	0.599766	0.354494	0.503478	0.391704	4.16324
Seita.1G086000	13.969	15.1145	10.3533	20.1008	19.5638	24.3829	64.5967	69.175	44.0774	0	0	0.049141	13.8801	9.69066	9.83493	86.5406	86.8263	82.5429	0	0	0.136561	8.3178	8.84204	9.64503	107.758	101.999	57.7888	0	0	0	15.5869	10.9485	18.794	69.1457	81.0922	74.1358	0.047617	0	0.022615	11.6066	18.9558	16.0196	83.1936	87.069	93.2737	0	0.033038	0.034793	14.7791
Seita.1G086100	12.651	11.1234	15.7385	15.7736	15.2169	13.5622	7.40849	6.2265	8.72987	8.10338	8.47488	6.78912	11.0363	9.30095	16.4351	6.76667	8.49131	7.71086	8.19772	7.56046	8.11876	15.7781	18.8959	12.8441	7.47366	9.26913	8.8551	10.3165	11.0954	7.633	15.0553	9.79911	12.3072	8.50091	8.65894	9.54978	9.94754	9.598	10.6355	11.6852	12.991	15.6639	8.16635	6.35462	7.57007	7.67948	6.55647	6.89161	8.03362
Seita.1G086200	4.54843	4.5149	5.74267	6.30809	4.62729	6.15552	3.14388	2.69198	2.8832	4.58889	4.29739	4.10184	2.57066	3.28727	2.86406	3.70735	3.35387	3.59091	4.2741	2.99228	2.16305	4.19976	5.00702	3.25437	3.82852	4.42639	3.7792	4.0026	4.71578	3.93412	3.65462	4.0897	3.71418	4.07231	4.01728	4.14992	2.94314	3.67285	4.06123	3.87888	3.31846	3.48675	2.14669	2.9463	2.7972	2.41029	2.66191	2.15765	4.28026
Seita.1G086300	21.6176	22.1242	15.4061	18.4993	18.0337	17.2092	32.314	31.3513	29.8692	44.726	51.7796	42.775	27.1593	32.4756	28.8916	24.4103	27.727	22.9976	25.7429	25.125	21.9602	29.35	32.8556	28.6547	56.0729	50.2201	41.1578	38.2368	36.7616	38.4839	101.94	60.9352	44.891	26.2468	25.3735	24.6678	36.8423	33.4465	35.9053	52.9973	19.5897	23.7189	13.9605	12.3449	20.6441	18.894	15.223	15.7353	22.9229
Seita.1G086400	0.024086	0	0.029239	0.003407	0.025766	0	0	0	0	0	0	0	0	0	0	0	0	0	0	0	0	0	0	0	0	0	0	0	0	0	0	0	0	0	0	0	0	0	0	0	0	0	0	0	0	0	0	0	0
Seita.1G086500	0	0	0	0	0	0	0	0	0	0	0	0	0	0	0	0	0	0	0	0	0	0.087902	0.388691	0	0	0	0	0	0	0	0	0.069568	0.002726	0	0	0	0	0	0	0.013994	0	0.039384	0	0	0	0	0	0	0.052268
Seita.1G086600	12.1882	13.1475	15.0979	14.5039	14.5615	14.0634	11.1571	7.43262	11.4904	15.187	14.5873	13.7126	8.80739	8.42343	11.8474	16.5999	16.3291	16.456	18.3328	15.462	15.6076	12.0901	15.6802	10.7467	6.4228	7.49155	8.45543	9.30153	9.35697	6.45028	7.60121	8.80411	8.58548	10.5531	9.7803	10.4283	9.29832	11.5923	9.74737	6.66818	7.97765	8.70712	9.89865	9.91867	12.2591	19.5355	17.1064	15.8189	15.4054
Seita.1G086700	0	0.036371	0.141738	0.065447	0	0	0	0	0	4.75127	3.73798	2.64481	0	0	0	0.041719	0	0	5.26293	6.2115	9.65994	0	0.058652	0	0	0	0	0.126985	0	0	0.000185	0	0	0.028817	0	0	0	0.000638	0	0	0	0.015593	0	0.078803	0	9.46007	8.31474	6.67813	0
Seita.1G086800	0	0	0	0.0023	0	0	0	0	0	0.074598	0	0.011191	0	0	0	0	0.000566	0	0	0.038798	0	0.022327	0.000468	0	0	0.026328	0	0	0	0	0	0	0	0	0	0	0	0	0	0	0	0	0	0	0	0	0	0	0.018293
Seita.1G086900	143.663	113.565	90.6892	53.9656	65.8757	48.2792	14.0441	4.69493	11.6748	41.924	24.8519	44.611	87.981	186.47	88.374	6.45086	7.9381	10.7401	34.2811	35.9486	59.4847	34.4379	37.9298	138.325	3.32089	6.38545	6.39232	23.1692	23.3164	15.7287	4.65713	23.4111	18.6069	3.24409	4.2448	6.11718	8.5405	12.6184	8.95066	14.8695	81.1728	37.8716	11.837	12.2839	6.49394	46.1499	62.3759	45.4019	41.3812
Seita.1G087000	0	0	0	0	0	0	0.126353	0.045924	0	0	0	0.081819	0.043249	0.136869	0.269958	0.025738	0.069783	0.00893	0.052337	0.050171	0.072414	0.482768	0.475221	0.197463	0.082553	0	0.107922	0.212054	0.135082	0.212519	0.038109	1.21807	0.65062	0.065284	0.169279	0.167611	0.086045	0.193202	0.062192	0.394763	0.214256	0.302816	0.00661	0.025865	0.039415	0.142075	0.091111	0.025551	0.311314
Seita.1G087100	2.22964	1.48667	2.08051	4.05157	5.0641	3.74401	0.564666	0.437762	0.565292	1.17501	0.914842	1.48489	1.35745	1.68151	2.58648	0.657808	0.764785	0.412063	1.67149	1.59506	1.08303	2.4465	2.44756	1.81557	1.92345	1.22242	1.67702	1.75513	3.12403	1.55965	1.90405	3.35434	3.04041	1.13416	1.01611	1.41024	1.50353	1.10793	1.5694	1.71548	2.52181	2.74827	0.24716	0.407512	0.426893	1.6416	1.25832	1.22364	1.45079
Seita.1G087200	46.8265	35.3416	43.0793	48.2552	40.9469	36.7403	8.09163	7.58613	6.26012	28.5648	25.431	23.809	32.5492	52.7328	28.5458	7.06224	6.76835	6.63269	20.7791	17.413	16.2852	19.4342	26.4543	57.8176	7.9692	7.91729	8.21232	15.3806	17.1983	9.90053	5.85576	20.3129	15.4205	10.2256	10.6002	11.1822	25.7371	30.1832	24.9839	14.5291	50.0593	31.8504	6.07257	5.9516	6.13226	19.8936	15.7847	19.0634	11.6902
Seita.1G087300	20.1561	17.9804	21.2614	23.8563	25.9158	22.9794	20.222	19.0022	21.9662	20.1311	19.7569	16.3811	17.0262	16.5049	20.1164	19.4815	20.8087	20.5196	16.8379	16.5774	15.0947	20.0505	23.2292	22.2401	22.633	26.8079	26.2992	25.597	26.2952	16.6886	34.624	31.1918	27.7326	18.9805	29.1437	31.2092	26.0597	26.3803	27.1079	31.648	26.6133	26.1127	19.4432	17.9415	21.1172	16.3076	15.5599	16.6524	15.3159
Seita.1G087400	8.80115	8.49912	12.0097	12.6522	14.3991	11.5308	4.17237	3.05394	4.10467	13.4678	14.0387	11.1799	12.3029	10.5104	6.04228	2.72301	2.9753	4.28608	9.54482	8.56344	7.89136	7.42166	7.19174	13.6469	6.39198	5.78213	4.17497	28.9162	24.6025	10.6775	7.73302	8.78269	5.42298	3.85861	3.97754	5.76166	12.7985	15.9743	12.6477	6.82629	5.12423	5.03778	1.94472	2.55443	3.35479	10.1726	8.85648	7.51486	4.23581
Seita.1G087500	11.7462	16.8557	10.4118	20.3664	15.0137	16.764	3.81411	2.31642	3.70335	20.2761	19.0911	18.7316	8.74095	9.61956	12.0317	4.05336	4.53732	4.42348	23.9438	22.4126	20.5036	15.7875	14.955	16.3022	6.61776	7.69628	5.62873	6.56623	7.74162	4.70634	24.6477	18.341	12.0353	5.04282	5.69756	6.05596	4.85455	4.60587	5.05843	15.1864	20.0508	17.759	3.43653	3.23761	4.27284	35.0054	37.236	24.7186	23.9104
Seita.1G087600	0	0	0	0	0	0	0	0.076097	0	0.398348	0.236166	0.241723	0	0	0.036216	0	0	0	0.03674	0.087951	0.322593	0	0	0	0	0.053683	0	0.139724	0	0.189092	0	0	0	0	0.055636	0.038423	0.276809	0.077614	0.035668	0	0	0	0.102461	0.061823	0	0.281612	0.282733	0.109643	0
Seita.1G087700	9.06133	10.3339	10.7737	11.4152	11.253	11.6872	10.2184	7.77731	12.8519	8.27447	7.15457	7.33644	7.72589	5.9991	12.1111	10.0919	10.0036	10.1603	5.97435	6.53659	5.94728	11.1651	12.3569	8.75582	8.4317	10.2834	13.1692	8.05502	8.42169	9.17006	12.6657	9.91213	13.6542	11.1244	11.4941	12.9431	9.96642	10.7822	10.761	10.4527	10.0702	9.45748	8.15623	8.07176	8.92138	6.76334	5.67993	5.47424	9.04389
Seita.1G087800	0	0.132492	0	0	0	0	0	0	0	0	0	0	0	0	0.033802	0	0	0	0	0	0	0	0	0	0	0	0	0	0	0.110793	0	0	0	0	0	0	0	0.076037	0	0	0	0	0	0	0	0.12011	0	0.185085	0.050229
Seita.1G087900	0	0.062011	0	0	0	0	0.058342	0	0.025551	40.5741	28.0513	28.1735	0	0.148924	0.137739	0	0.164258	0	78.6725	79.258	78.5322	0.058505	0	0	0.157352	0.203721	0.199843	22.387	16.2267	55.9009	0	0	0.040879	0.472067	0.417165	0.071642	81.1254	62.6822	87.1812	0	0.053235	0.068686	0.129608	0	0.077006	23.2399	21.6876	34.7241	0.397057
Seita.1G088000	0	0	0	0	0.036301	0.035912	0	0	0.032923	13.4318	15.3831	9.63335	0.711301	0.559386	0.249815	0	0	0.176695	7.7681	7.6038	9.49689	0.063919	0	0	0	0.169311	0.036909	16.5566	13.8363	16.4925	0	0.05044	0	0.037472	0	0	36.616	34.7524	39.6398	0	0	0	0	0	0	5.41193	3.87705	7.44931	0
Seita.1G088200	0	0	0	0	0	0	0	0	0	0	0	0	0	0	0	0	0	0	0	0	0.032028	0	0	0	0	0	0	0	0	0	0	0	0	0	0	0	0	0	0	0	0	0	0	0	0	0	0	0	0
Seita.1G088400	0	0.059816	0	0	0	0	0	0	0.063782	0	0	0	0	0	0	0	0	0	0	0	0	0	0	0	0	0	0	0	0	0	0	0	0	0	0	0	0	0	0	0	0	0	0	0	0	0	0	0	0
Seita.1G088500	0.601359	0.443487	0.426805	1.25824	1.29042	0.744783	8.92648	6.24568	8.60258	7.05356	9.16667	6.54067	10.2352	8.93457	14.7722	9.91635	10.9187	11.1818	6.53477	5.64426	6.56406	12.9955	13.0074	11.8935	7.37886	7.54332	9.44143	11.4899	12.7757	9.56122	11.1377	15.6213	16.7135	8.78523	7.21184	8.07272	10.4953	10.6736	10.8392	12.2691	12.7578	14.4783	0	0.336564	0.844729	0	0	0	0
Seita.1G088600	8.93203	6.85878	8.42236	6.96626	12.0719	7.99479	2.48226	2.37161	1.60286	2.36413	2.52712	0.94194	3.33091	2.86242	3.3367	1.92074	2.52874	2.26935	1.99418	1.34744	1.58231	6.27198	4.16739	3.14042	5.79214	6.25918	2.51374	4.53409	6.94483	3.33724	24.9157	12.654	5.06821	2.20801	2.62689	3.62039	3.86107	4.44244	3.43284	11.0336	5.07794	7.15199	4.64506	4.12276	5.83632	3.43131	4.44175	3.95449	4.05707
Seita.1G088700	37.3358	38.5506	41.4603	37.0201	38.4025	34.7749	37.3672	35.7276	31.7101	62.2583	74.6877	52.3168	53.0597	54.7001	45.1165	34.5859	34.8995	33.4694	63.2673	52.0025	49.4535	55.142	57.7775	46.2088	43.4138	44.5693	30.8694	59.1914	58.4652	40.6182	66.8799	43.0308	36.246	49.112	47.6603	49.3812	58.9287	56.6984	57.0292	47.8951	39.6647	42.6873	25.1085	23.9198	21.6879	53.255	53.2603	51.0048	38.5699
Seita.1G088800	4.15509	5.90385	5.46516	3.71058	4.22862	3.48819	3.56105	2.99928	4.20988	4.03367	3.34142	5.75059	4.58911	5.03675	14.7602	2.83425	2.94958	3.65509	2.92379	3.33073	4.17655	11.2899	10.6468	5.24188	1.95118	2.8373	5.29389	6.50383	6.01548	9.3498	2.53364	4.1758	8.0027	4.18219	3.74986	4.23879	5.06809	5.07216	4.9192	3.82256	5.39855	5.93404	1.65621	1.65471	1.67619	1.42763	1.83423	1.319	8.6683
Seita.1G088900	127.346	133.822	120.974	167.048	149.21	156.773	151.44	136.924	132.751	117.486	128.603	89.1629	120.119	124.051	117.248	124.028	125.665	120.676	89.0873	70.1455	72.7502	156.434	150.408	143.647	152.215	150.961	134.448	136.318	156.901	87.8126	155.23	158.997	145.809	133.329	135.163	130.85	128.132	124.639	122.204	144.978	173.019	155.283	120.016	111.17	138.887	89.5651	87.3253	82.976	121.441
Seita.1G089000	0.056942	0	0.039528	0.091044	0.200191	0.104665	0.055636	0.063987	0.017446	0	0	0.066497	0	0.016391	0.07952	0.242615	0.155931	0.060829	0.081104	0.092256	0.052236	0.127569	0.163172	0.298051	0.047867	0.029906	0.038855	0.049161	0.06419	0.050435	0	0	0.226113	0.012774	0	0	0.048717	0.037457	0.020771	0	0.29241	0.069674	0.101003	0.034441	0.066019	0.043562	0.031033	0.121391	0.052566
Seita.1G089100	1.31224	0.866986	0.793394	2.04616	2.25812	2.58601	1.10582	1.57968	0.918544	0.905958	0.267482	0.591286	0.864082	1.40815	0.872694	1.75879	1.19097	1.25977	1.12498	0.650172	0.74425	1.63378	2.27978	2.53239	7.07233	4.49809	2.11229	1.7893	2.14458	0.740989	3.75305	3.08321	0.792638	2.27137	1.77679	2.40676	1.53997	2.27305	2.01085	1.32154	1.66821	2.17702	1.01347	0.546126	1.3787	0.459687	0.772413	0.507257	1.84968
Seita.1G089200	12.1709	15.326	15.743	18.8024	19.1021	20.5363	22.6793	9.55494	18.9829	3.45327	3.16904	8.33958	18.4443	6.83213	11.9963	18.1078	27.3087	15.9254	8.35105	7.25048	3.39892	22.8358	22.6846	13.8908	30.1527	23.1209	16.2128	10.3542	9.4235	6.95966	23.4983	12.2035	22.2467	23.4844	23.9299	18.3966	16.826	16.8599	11.1553	18.6063	19.8016	20.8841	21.759	21.794	25.1901	6.39801	7.34821	6.80339	13.2341
Seita.1G089300	10.9695	10.1125	11.0871	18.859	14.9521	14.3726	5.55744	5.27145	5.28654	7.42775	7.37543	6.14329	9.30134	8.77686	10.6766	4.94998	6.16061	4.20362	8.26356	6.95111	6.87966	7.06145	9.00773	7.75605	4.94906	5.47536	7.13518	9.37045	8.98223	7.45825	8.05197	7.43812	7.8697	8.01156	7.49301	9.35871	8.89951	8.10331	9.97163	5.53979	8.47869	11.1664	5.52062	4.11111	5.37994	7.73757	6.24011	6.76683	9.81774
Seita.1G089400	11.4591	10.0188	11.0305	16.1169	12.2103	17.88	8.92437	8.10105	9.30404	8.45067	10.0413	9.17036	10.0947	10.4314	13.0074	10.066	9.12921	10.007	8.23975	9.88078	8.68369	11.1472	10.9217	10.5814	11.2821	8.74235	10.1235	9.82109	10.6003	8.01554	10.4764	16.9474	13.4296	17.139	20.1604	19.3673	11.1211	11.3725	11.56	16.3231	17.1405	17.5497	5.41527	6.8404	6.21934	7.40292	7.76994	7.16738	12.7089
Seita.1G089500	26.9916	26.1474	20.3431	43.5133	48.7493	44.4782	78.7638	81.5537	129.167	0.288499	0.259346	0.322529	4.20128	9.12998	18.5831	87.9494	89.8047	106.694	0.69475	0.631022	0.245103	3.53457	5.22652	13.7986	75.1154	114.981	244.322	0.159882	0.290552	0.731139	4.48505	9.01467	43.8468	256.351	313.072	295.032	0.449107	0.384196	0.443303	12.2027	28.5746	31.5753	48.2332	94.9834	79.3011	0.212244	0.407287	0.23951	13.1318
Seita.1G089600	16.7088	14.5451	20.621	21.2229	19.8339	21.4418	11.7297	12.0079	7.67874	15.4957	19.5824	11.132	30.3716	22.4015	16.0017	17.6994	17.0247	15.915	18.9884	16.9967	15.7667	28.9061	27.6318	28.0951	24.967	21.5336	13.1385	24.9545	29.3392	11.4648	22.1216	21.3415	13.6652	22.1844	19.8458	21.37	22.9894	25.3461	23.3549	23.1547	20.0218	17.6796	11.3966	13.7129	11.6234	11.8522	11.9147	12.5592	13.2372
Seita.1G089700	30.9559	34.5658	39.2603	59.5071	43.8954	54.771	33.0636	30.5828	35.4783	40.7108	43.6758	40.1888	32.9114	29.2755	44.5354	28.0451	29.065	26.5903	38.0144	36.8277	33.3042	46.8597	51.5515	35.7662	46.2397	46.7247	50.9193	54.2429	49.5983	44.0094	104.371	80.7104	62.9391	39.4325	39.0524	43.159	51.414	54.5283	49.8885	101.898	48.9247	60.7026	27.5825	25.0058	30.8862	36.7273	35.2136	33.6282	39.9694
Seita.1G089800	0	0	0	0	0	0	0	0	0	0.045155	0.106149	0.207092	0	0	0	0	0	0	0.370592	0.591843	0.291314	0	0	0	0.035492	0	0	0	0	0.101879	0	0	0	0	0	0	0.04383	0	0	0	0	0	0	0	0	1.05931	0.957344	1.02039	0
Seita.1G089900	27.0632	38.4916	28.8612	55.4045	35.5157	54.4377	33.1342	30.3622	37.8476	77.4791	82.3556	79.7579	28.7217	34.2266	41.9555	33.2754	31.545	29.5825	103.166	112.359	103.273	52.8433	49.6674	35.1401	49.3477	48.9705	55.4935	57.7519	53.0824	91.9869	42.1161	39.7002	55.8789	47.9285	42.4068	44.1892	63.4123	68.3637	68.4745	36.4716	42.8048	42.8801	26.6599	23.1072	27.2033	85.6876	88.9316	88.9025	112.331
Seita.1G090000	7.5916	7.18077	6.87574	7.54751	9.17119	7.76767	4.62608	5.18922	3.55391	7.91396	6.2737	8.59232	4.78301	8.34159	5.23965	6.1978	6.05192	5.89608	9.33897	8.50914	7.67199	7.12108	5.19944	5.69117	9.08019	6.2061	6.50773	7.88528	9.67399	8.27309	5.14371	5.0034	4.5937	8.46274	7.6586	7.96671	9.12323	10.3575	7.78155	7.97093	7.28722	5.69907	3.29387	4.35761	4.1006	7.26271	7.74476	7.95863	4.02436
Seita.1G090100	20.7505	17.9932	23.4007	28.7788	32.1519	27.5098	14.2279	10.262	17.9786	14.6246	12.0427	15.0485	8.44976	7.62726	21.4415	13.5033	14.5903	12.5561	15.177	13.1661	15.0118	18.4887	20.3354	10.842	13.1907	14.7552	25.9303	21.4466	21.4704	18.6016	45.2151	22.1617	34.0049	20.9357	21.5649	23.8021	22.3172	23.5346	24.4534	30.2958	22.3139	29.6585	15.6325	11.8929	14.5607	15.3698	12.6881	13.6591	18.8217
Seita.1G090200	9.59815	10.2042	9.6791	8.95618	8.65103	8.20709	6.85426	5.69989	6.9292	8.15697	5.43967	8.153	7.06326	7.77407	10.3729	6.22322	7.01615	6.976	6.30969	5.86954	5.64757	11.1642	9.42028	7.84325	5.35792	6.12051	6.91402	7.73987	7.51483	6.46556	7.38753	7.89298	8.22978	7.34263	6.82845	7.04345	9.79605	8.83913	9.75424	7.71342	8.11188	7.68311	5.69125	5.15331	5.84311	6.94486	7.46322	6.7987	9.67608
Seita.1G090300	0.130286	0.044565	0	0	0.010375	0	0	0	0.010253	0.99784	0.902799	0.762121	0	0	0	0.013741	0	0	0.803572	1.01099	0.730136	0.061252	0	0	0	0.072228	0	0	0	0.079011	0.300106	0.064552	0.057973	0	0	0	0.054026	0.240717	0.250819	0.102587	0	0	0	0	0	1.51095	1.77231	0.308192	0.451657
Seita.1G090400	0.568404	0.785599	0.39754	1.03938	0.364697	0.504759	0.097755	0.053965	0.044141	0.936993	1.43214	1.16707	0.941513	0.68915	0.656982	0.236629	0	0	0.480162	0.658635	0.818265	0.639551	0.529047	0.699893	0	0.151335	0.024742	0.684125	1.13658	0.309572	0.346606	0.303643	0.514821	0.099811	0.107444	0.053033	0.452598	0.223282	0.62923	0.259342	0.939548	0.254781	0.047498	0.087142	0	0.851191	0.723907	1.26411	0.938442
Seita.1G090500	0.801782	0.711146	0.509422	1.3709	1.16126	1.33594	0.574095	0.394958	0.565575	0.969056	0.927437	1.44022	0.407488	0.505878	0.916866	0.460516	0.499222	0.452556	0.953081	1.36211	1.40712	0.550391	0.570531	0.498213	0.469117	0.623812	0.787698	1.1663	1.58353	0.772658	1.5536	1.67831	1.56351	0.78656	0.699591	0.90439	1.22281	1.0878	1.11313	1.92663	1.70004	1.40855	0.341637	0.351325	0.454652	2.81635	2.53219	1.55401	1.01446
Seita.1G090600	5.26399	5.46174	7.63732	12.0842	9.83668	12.2111	5.90101	7.91183	7.53344	6.52226	7.58607	5.89288	5.55803	4.4685	6.82574	7.60227	10.6194	6.62232	7.01363	7.65088	7.61257	10.3808	17.3424	15.8312	5.76795	17.9389	10.4728	14.1145	18.0674	9.02954	20.5177	12.7494	8.95773	11.3599	9.33191	11.1138	9.56575	9.41647	9.57445	8.19396	11.475	8.69061	6.43044	4.96967	7.66997	6.73018	5.97934	6.29403	6.99036
Seita.1G090700	3.93565	4.55077	5.56576	4.46562	5.85282	5.29322	5.15283	4.59821	4.74843	8.14405	8.11519	6.36685	5.7951	6.11172	4.38514	6.96952	7.20106	6.58421	7.40991	5.92941	6.46399	5.01047	6.24381	4.63495	9.46809	8.18018	5.86646	10.5784	9.75124	6.4025	17.5582	10.1112	5.89092	8.95746	8.03144	8.60403	10.2786	9.85946	8.04313	12.03	5.75995	7.43166	5.16883	5.72252	6.05236	5.46409	5.89063	6.6558	3.28443
Seita.1G090800	10.4692	9.15854	9.19882	13.8055	14.1998	12.9525	5.08337	4.25922	7.02986	16.2287	9.18625	20.0201	5.87905	5.18066	8.98158	9.2257	8.06015	9.49085	22.6993	20.9967	19.4262	4.60793	5.37827	5.26391	7.35456	6.5024	11.6854	8.05489	9.60954	11.392	0.770571	4.43659	11.3096	9.33464	9.87355	9.70244	15.6691	16.9047	16.4197	6.11937	7.20281	8.50867	5.07246	5.78996	7.10129	22.6612	20.0226	21.0711	4.45151
Seita.1G090900	29.6254	25.1331	45.4178	11.0373	14.7458	11.7296	0.74311	0.564955	0.687039	6.0873	4.83757	6.36502	38.6767	19.524	26.8318	0.723936	0.930851	0.57578	5.32733	4.20181	4.56984	38.9841	43.3114	32.6579	1.54412	1.2684	1.59368	6.25037	8.32464	5.33466	1.00931	12.1698	13.9275	0.849623	0.667255	0.977598	6.39497	7.06002	6.59823	12.3237	7.35668	9.90001	0.313909	0.427172	0.588086	7.82055	5.6973	6.93519	9.13832
Seita.1G091000	7.64135	6.58248	8.63344	12.5018	12.6951	11.6543	10.4786	9.37129	8.11989	8.82921	12.3116	9.39855	5.34982	5.64403	7.88277	10.9342	10.9457	9.36852	10.7944	9.66772	8.19403	10.8729	7.57128	6.18926	14.374	15.1954	11.0496	12.9428	16.0772	11.249	33.3665	17.4762	14.5967	14.4894	14.0383	16.6696	18.9802	16.7231	15.2269	21.52	18.7342	23.2533	9.64498	10.7732	8.78493	7.54142	6.76113	8.73032	8.56704
Seita.1G091100	0	0	0.055874	0	0	0.028268	0	0	0	0	0	0	7.01022	0	6.58614	0	0	0	14.4239	0	18.9401	0	10.4203	0	0	0	0	0	12.2017	0	0	0	0	0	0	0	23.823	0	0	0	0	0	0	0	0	0	0	0	0
Seita.1G091200	0	0.0085	0	0	0	0.005882	0	0	0	0.113877	0.068507	0.040348	0	0	0	0	0	0.042561	0.043222	0.079999	0.038093	0	0	0	0	0	0	0	0.091329	0.029742	0	0	0	0	0	0	0	0	0	0	0	0	0	0.022114	0	0	0.058071	0.09064	0
Seita.1G091300	6.67936	5.18097	11.1119	5.29457	8.48796	6.9582	1.41124	1.07632	1.42129	3.52504	2.15702	3.19598	2.3665	2.62921	8.03132	2.01889	2.58317	2.26037	2.9692	3.05475	3.05095	5.83995	6.59038	3.62445	3.18852	2.54629	2.98693	3.66614	3.12297	3.21346	6.67997	5.41239	7.40563	4.01606	5.22361	5.63756	4.98691	4.02531	5.61554	7.71316	6.17905	7.83398	1.77882	1.95199	2.18187	2.76044	2.70324	3.17436	5.44749
Seita.1G091400	0	0	0	0	0	0	0	0	0	0	0	0	0	0	0	0	0	0	0	0	0	0	0	0	0	0	0	0	0	0	0	0	0	0	0	0	0	0	0	0	0	0	0	0	0	0	0.01813	0	0
Seita.1G091500	0	0	0	0	0	0	0	0	0	0	0	0	0	0	0	0	0	0	0	0.023819	0	0	0	0	0	0	0	0	0	0	0	0	0	0	0	0	0	0	0	0	0	0	0	0	0	0	0	0	0
Seita.1G091600	4.59277	6.18853	5.06468	3.73347	3.68076	2.84817	0.992462	0.757069	1.08015	3.85548	1.82412	4.20093	2.29161	3.26031	6.79777	1.17474	1.1065	1.29713	3.70415	3.46491	3.534	7.21728	6.68109	2.16445	1.69487	1.41861	1.87344	0.947339	1.28871	0.615698	2.64849	3.08763	4.48294	2.08839	1.80657	2.03277	1.29913	1.16959	0.602614	3.36227	3.42908	4.31608	1.31319	1.15686	1.08588	7.59994	8.0153	5.13649	7.499
Seita.1G091700	21.2504	26.6082	25.6987	38.4496	42.0734	40.8634	25.1087	24.9325	25.8463	35.9097	28.6348	50.1606	22.2459	18.2982	36.8639	18.1235	19.581	18.2083	40.8722	49.5984	37.3881	29.3841	30.6188	16.913	39.4303	38.5751	39.2674	64.8921	58.7459	51.2193	225.923	107.139	84.6948	43.2653	46.9111	46.6526	52.1761	56.48	57.2629	99.4913	47.9393	73.6196	22.6034	18.1818	23.8849	52.0546	48.7152	39.5055	33.7662
Seita.1G091800	1.53054	2.40852	2.61434	1.20772	2.64928	1.57715	1.86696	0.899376	2.14215	22.383	9.86876	12.8331	2.17751	2.81185	2.37193	1.89506	1.46987	3.07543	10.3482	10.3183	9.36842	3.75979	3.73815	1.8471	1.36405	3.40309	2.21159	4.89049	4.65724	4.62214	4.15191	3.30323	2.85906	1.84414	1.51033	1.34594	5.1777	7.25082	6.40348	2.44501	2.89683	1.99065	2.17894	1.22997	1.42666	13.4315	14.5157	9.93392	1.03217
Seita.1G091900	46.77	46.6967	55.9345	30.3752	34.1443	27.4175	6.89554	7.20984	6.93158	6.2273	6.89914	5.26786	25.235	25.3378	39.4892	8.70628	7.92828	9.39454	4.40804	4.22421	5.58745	41.7019	45.5413	40.4601	7.93853	9.7655	8.66811	4.79199	5.1279	2.77282	15.119	20.2874	28.3373	14.367	16.7742	17.7474	4.08115	4.75219	4.41301	36.5279	45.208	49.8581	6.17032	5.86806	6.27623	5.60697	4.45149	4.33612	43.3865
Seita.1G092000	10.126	8.69969	11.9144	7.56346	8.47272	6.47569	1.53866	1.49761	1.55748	3.74916	4.39758	3.16394	9.77154	9.0699	12.5426	1.30922	2.02343	1.5416	3.60207	3.42045	2.90877	11.4222	9.32604	9.42044	2.44315	2.02074	1.64405	3.56071	4.34208	2.66073	2.93796	3.90254	3.15889	1.76089	2.00467	2.24766	3.78202	3.5868	4.08301	4.66569	7.59322	6.86347	1.41541	1.28388	1.45921	3.93644	3.47584	3.17278	7.40177
Seita.1G092100	8.50106	12.2282	16.2987	18.6719	16.2431	20.8056	14.8101	12.2042	18.6687	16.7032	16.6224	17.758	11.4167	7.88823	16.8865	19.5905	17.4528	17.7787	18.6941	16.3038	19.7878	18.8693	20.6914	13.151	19.5465	19.677	23.7865	17.9382	20.135	21.3585	23.8985	19.4431	22.5684	21.248	22.1387	23.9753	20.1098	21.4369	20.9985	22.9037	17.521	21.8976	12.9189	13.6846	16.2573	14.816	13.9601	13.5846	14.5055
Seita.1G092200	0.084551	0.043382	0	0.09422	0.135672	0	0.045417	0	0	0.14954	0.117178	0.052171	0.052137	0.018845	0.047434	0	0.056691	0.274612	0.167662	0.310839	0.100645	0	0.119108	0.056568	0.058769	0	0.00935	0.17337	0.332644	0.076913	0.003936	0	0	0.092745	0	0.066022	0.210763	0.1762	0.16759	0	0.101946	0.094824	0	0	0	0.242932	0.148548	0.112441	0
Seita.1G092300	34.9036	39.5947	54.7478	79.0277	85.9045	90.5315	47.6593	42.8965	37.8158	79.9035	96.0835	56.1787	36.2197	22.761	48.8491	62.4494	61.6655	58.0848	73.8945	72.2627	70.5497	110.379	108.927	44.0772	72.4762	76.9786	53.5866	100.476	98.9044	61.9678	207.654	137.984	92.8814	87.7607	79.6333	82.9729	100.876	103.202	93.1873	155.386	101.387	115.527	31.9533	37.9459	35.3198	47.6194	47.6448	52.1179	51.9695
Seita.1G092400	22.0907	23.5081	22.617	8.42513	8.91955	8.98356	14.6527	13.401	11.3951	46.6132	45.6375	36.949	20.5968	20.0067	16.9469	14.838	13.6226	11.5385	40.4719	37.5999	28.6984	17.2754	17.2242	11.8103	9.33829	10.102	9.09162	21.9248	24.5569	13.8209	17.9737	13.0429	7.72927	19.6198	20.4296	19.4687	20.6171	23.9763	21.4205	12.2739	14.0944	13.3306	11.171	11.6378	9.37508	32.8728	33.2547	35.2702	22.6661
Seita.1G092500	1.09321	2.03601	1.10027	1.65081	1.30541	0.880614	8.35507	7.90691	8.08598	22.084	16.263	17.2215	1.00022	1.67743	1.43586	8.77228	6.7735	5.40161	18.2424	11.9342	10.7063	0.992479	0.559717	1.48003	8.80556	6.6954	8.31962	5.58164	6.54151	2.44949	8.98254	2.0244	1.54906	12.1455	14.715	12.0491	12.4842	15.22	9.48167	1.90394	0.877575	0.666409	5.54063	5.52153	5.95205	12.3564	9.47088	11.5646	5.70235
Seita.1G092600	0	0.020048	0.033624	0.022482	0	0.018795	0.076695	0.244676	0.055001	0.131123	0	0.09305	0.024502	0.122764	0	0.156589	0.25195	0.303127	0.054909	0.106878	0.053802	0	0.10142	0.068147	0.255017	0.257282	0.068472	0.094062	0.068763	0.036146	0.087508	0	0	0.130048	0.094527	0.06653	0.054148	0.071639	0	0.007905	0.065397	0	0.049413	0.064068	0.054417	0.077742	0.082742	0.120097	0
Seita.1G092700	4.20724	4.13331	5.71183	6.55544	5.9601	5.85956	5.08484	3.67321	4.68163	5.76018	7.63203	4.57419	3.33502	2.53947	4.06775	6.23042	6.31352	6.35039	5.31446	5.20218	4.83611	6.08268	7.56256	4.173	7.11695	7.03698	6.42413	9.48091	11.4085	7.17255	16.8719	14.4493	9.47828	10.4882	8.52886	8.35294	8.13064	9.36881	7.77546	13.6888	6.3893	7.01371	4.95944	5.37807	6.77162	5.12788	5.08293	4.93926	5.46922
Seita.1G092800	0	0	0	0	0	0	1.88078	2.24796	1.86779	0	0.070598	0	0	0	0	0.298064	0.239088	0.494915	0	0	0	0.355169	0.113009	0.068163	2.05884	2.53321	1.03352	0	0	0	0	0.448725	0.330716	4.2107	5.9718	4.93432	0	0.03252	0	0.205749	0.063887	0.05713	0.857207	1.20678	0.425934	0	0	0	0
Seita.1G092900	4.75973	12.3594	2.22865	0.02237	1.06666	0.089558	0.105008	0	0.056688	2.34089	1.2047	2.3419	0.581611	1.39153	4.57326	0	0.052429	0.101791	0.899569	2.9272	2.96541	41.7077	22.2667	4.05689	0	0	0	0.158556	0.281951	0.645952	2.64824	3.4056	8.20773	0	0.030984	0	0.33879	1.67009	0.321949	5.26788	2.17507	5.29788	0.041369	0.062404	0	8.10559	11.3561	2.49996	55.5101
Seita.1G093000	0.452776	0.811499	1.09321	1.40819	0.870023	1.18782	0.721507	0.68995	0.820849	0.515895	0.234215	0.64226	0.113881	0.201801	0.738366	0.495918	0.748852	0.75718	0.599767	0.680283	0.584352	1.88285	1.79631	0.626672	0.921918	0.890364	1.21041	0.845448	0.842922	0.595131	0.947032	0.647384	0.873611	1.07086	1.01191	0.868295	0.85316	0.663258	0.868831	0.92432	0.696563	1.07098	0.713641	0.419052	0.61451	0.626033	0.644456	0.604388	2.07147
Seita.1G093100	25.5909	26.6816	19.8653	27.5763	24.1102	25.3019	20.7123	19.8853	18.3144	22.4637	25.7725	22.7065	28.8975	32.9708	21.321	20.9493	19.7087	24.4496	25.8619	25.2073	29.6752	22.6516	20.4179	25.6935	19.8708	24.4382	17.5329	18.1863	17.6597	18.6514	9.35002	16.9626	17.2837	18.7957	21.2607	19.6367	17.703	18.7412	23.1305	13.5189	20.7518	22.8545	19.153	23.6917	19.7107	24.4224	31.0095	25.8336	21.4414
Seita.1G093200	0.121502	0.286087	0.055008	0.221084	0.244752	0.321036	31.5049	30.5914	36.1112	0.041706	0.108336	0.131619	0.196156	0.13065	0.083211	2.14141	2.05087	2.96992	0.149088	0	0.020606	0.156109	0.096518	0.118325	16.7895	9.8935	16.837	0.385692	0.330421	0.731235	0.110034	0.128024	0.466514	77.3821	124.737	97.4088	0.493821	0.351525	0.388551	0.326823	0.055823	0.19451	13.1454	20.6011	13.9768	0.017138	0.015654	0	0.161861
Seita.1G093300	3.43123	3.47256	3.84066	7.18042	7.43446	8.51128	9.65876	8.37588	7.54876	2.60978	3.64942	2.41717	2.10676	2.74515	3.75579	10.9055	11.4832	10.6705	3.00042	3.34152	2.97432	5.8391	5.14274	4.43896	15.6828	13.0616	16.2274	3.42458	5.32517	4.57226	6.05033	5.12244	7.68639	13.8199	9.92261	12.1339	3.32286	3.66344	3.65028	3.84068	5.07273	4.16603	11.3022	10.1662	12.7572	2.81948	2.95002	2.96511	4.28284
Seita.1G093400	15.551	15.142	21.9564	21.7891	23.0025	19.2586	12.7223	13.3093	18.7624	13.1736	9.53771	16.4908	13.3945	13.3159	19.9978	12.4376	15.5605	13.3143	21.7405	17.8714	19.4542	17.4042	17.4005	11.9388	11.7036	16.125	20.7771	14.7005	19.0591	15.4343	7.80134	14.8721	14.4711	18.0565	13.183	18.4663	20.3629	21.5348	23.1465	13.7045	16.0976	15.3662	17.842	12.984	17.9063	22.1012	16.9683	17.9028	14.194
Seita.1G093500	0.124022	0	0.189274	0.078229	0.052577	0.484416	0.015545	0.412992	0.133696	0.081241	0	0.113275	0.042487	0.262379	0	0.258016	0.261169	0.089692	0	0.168869	0	0.192091	0.162788	0.043639	0.640147	0.569526	0.291521	0.094187	0	0.414741	0	0.140309	0.045682	0.830345	0.89876	0.574076	0.044571	0.120604	0.148827	0	0.341872	0	0.072905	0.225668	0.129948	0	0.171125	0.182033	0.193474
Seita.1G093600	0	0	0	0	0.018556	0	0	0	0.034819	0	0	0.045039	0	0	0	0	0	0	0	0	0.083627	0	0	0	0	0	0.038254	0.049059	0	0.057022	0	0	0.047908	0	0	0	0.133937	0	0	0	0	0	0.075948	0	0	0	0.063743	0.061226	0
Seita.1G093700	0.062362	0.113999	0.226578	0.087658	0.214125	0.107827	0.018613	0	0.050197	0.289951	0.014124	0.211068	0	0	0.037387	0	0.051248	0.049749	0.096666	0.187332	0	0	0.084782	0	0.053127	0.136345	0.020784	0.14368	0.397526	0.242573	0	0.056806	0.203556	0.042202	0.16418	0.046744	0.075782	0.046889	0.087855	0.02928	0.047446	0.133831	0.080876	0	0	0.092477	0.254546	0.101873	0
Seita.1G093800	3.8745	3.64394	4.60639	5.62584	6.18233	5.91743	3.95227	2.92601	7.62429	2.39745	1.87882	3.22715	1.74799	1.96594	4.53081	4.85176	4.57828	4.91587	2.35959	2.33177	2.57838	2.83984	3.38686	2.53115	3.32636	3.34609	7.8838	2.91541	2.91098	4.61695	3.62539	4.14845	7.19801	6.32842	5.90552	6.08528	3.80927	4.1519	4.39649	3.7252	3.46918	3.85047	5.62167	5.01156	6.32824	3.05905	2.58369	2.59087	3.31808
Seita.1G093900	113.752	119.773	83.5302	95.1865	100.032	106.536	423.367	438.733	353.51	7.67858	6.17809	10.058	59.8786	66.1096	79.6187	553.71	519.754	550.189	9.51192	8.49368	10.9518	46.6988	48.1533	67.3696	331.431	347.862	286.916	5.94139	6.79261	6.60425	20.6033	29.677	59.5837	309.989	345.558	273.364	9.47362	7.08964	7.69586	24.1126	69.8104	51.1173	522.793	584.301	547.052	8.56451	9.77906	8.35032	99.0506
Seita.1G094000	21.6465	19.3911	22.2206	18.304	23.8934	17.0104	11.3312	10.5343	7.75414	16.2873	20.7577	13.5487	24.5932	17.6608	17.0881	17.6646	18.6853	15.5113	15.6324	11.7893	11.0913	15.6033	19.1163	19.0194	12.4781	14.3007	9.22265	13.9497	17.7862	9.08074	15.5375	12.0288	10.9814	10.5341	9.88356	10.8748	16.765	18.7597	16.4189	10.903	12.0347	11.987	10.7737	13.0319	13.5026	16.5694	13.8931	13.4379	12.431
Seita.1G094100	14.0387	15.2858	13.1894	17.8364	15.0006	16.3699	8.39474	6.37683	12.4914	7.32297	9.07944	11.1552	11.6681	5.61386	17.3894	7.81022	7.95331	5.84351	7.4445	8.00181	8.9626	13.8053	14.1758	8.86002	6.44143	7.67177	14.1612	11.2698	10.1957	16.0406	17.0554	12.5255	15.5207	10.4765	7.74531	10.9128	9.88487	8.94655	9.00651	7.29591	8.45969	9.90742	7.40239	6.61803	8.15732	9.68651	8.09163	9.1993	20.8879
Seita.1G094200	2.92366	4.44483	0.037342	0.023048	1.27772	0	0.05102	0.058777	0.029712	3.29146	3.17349	3.84198	2.1078	6.61776	3.04684	0	0.022845	0.116963	3.02043	4.12257	3.98376	0.106806	0.055915	0.090734	0.045621	0.02683	0.061689	0.053381	0.140531	0.105591	0.07484	0.025032	0.108693	0.131936	0.049606	0.023082	0.336318	0.274292	0.321913	0.449498	0.144015	0.038652	0.020565	0.01944	0	6.00261	5.99892	4.61531	1.61589
Seita.1G094300	0.040608	0.192956	0.165569	0.065908	0.130477	0.034987	0.031595	0.101302	0.031594	0.776038	0.320641	1.25077	0.107193	0.322688	0.283764	0	0	0	0.452329	0.139972	0.402319	0.895635	0.455508	0.033177	0.153129	0.054984	0.077138	1.21243	0.495905	0.679318	0.727623	5.24803	2.18402	0.036507	0	0	1.68188	4.13394	1.78079	3.72978	0.125218	0.256754	0	0	0	1.34002	1.74077	2.6021	0.198143
Seita.1G094400	0	0	0	0	0.19752	0.130561	0	0	0	0	0.083899	0	0	0	0	0	0	0	0.081546	0	0	0	0	0	0	0	0	0	0.429905	0.168337	0.234705	0	0.082344	0	0	0	0.076737	0.454092	0.136786	0	0	0	0	0	0	0	0	0.05481	0
Seita.1G094500	6.64387	6.43763	7.53105	5.23875	6.51063	5.2063	13.7961	17.4405	12.5325	2.96463	4.21308	2.46723	9.13205	9.01967	6.40203	18.4787	18.1419	12.9765	2.35973	3.1285	2.1956	6.90897	6.40727	5.38124	15.9394	13.7589	9.53371	2.53918	3.14992	1.57546	4.07693	4.91971	3.36475	9.55487	10.5646	11.1816	1.78902	2.43178	1.38329	3.76254	5.47898	4.73199	16.0056	14.7174	17.7388	2.69818	2.48599	2.48859	5.10547
Seita.1G094600	0	0	0	0	0	0	0	0	0	0.202911	0.228941	0.103152	0	0	0	0	0	0	0.164338	0.157333	0.151949	0.061314	0	0	0	0	0	0.118852	0	0.039545	0	0	0	0	0	0	0.05408	0	0	0	0	0	0	0	0	0.763051	0.372878	0.534087	0
Seita.1G094700	2.6831	2.30409	2.84581	4.16068	4.27518	3.85116	4.27955	4.05225	6.11786	2.85974	2.79957	3.63585	3.85157	3.65395	8.96945	1.84071	1.82342	1.95977	0.332438	1.09638	1.1751	2.02424	2.45124	2.46693	3.9246	4.10576	7.09543	4.21145	4.38844	0.38674	8.65535	8.29359	11.6837	2.59566	2.6247	3.03909	3.11277	2.82592	2.33935	5.35301	4.09527	4.29312	1.47609	0.959572	1.80132	0.895467	0.935741	0.904211	1.07883
Seita.1G094800	3.38501	4.02901	4.91694	7.88962	6.22654	6.88056	4.36331	3.12852	4.76983	5.05731	4.77254	4.78297	2.7416	1.768	4.25852	4.40968	5.1797	4.03214	4.72879	4.32952	4.62377	6.24754	6.3572	3.9058	4.5992	4.83678	6.17174	5.72222	5.28723	4.0567	7.22083	4.83528	5.88334	5.57142	5.39682	6.77331	5.5845	5.09858	5.48122	5.25217	4.97985	5.51608	4.85564	4.24062	4.855	4.51452	4.11213	4.46439	5.08674
Seita.1G094900	12.0392	11.8697	22.0591	17.7778	23.7225	20.4517	14.5822	19.6493	12.0145	16.0755	18.656	14.7422	14.4409	12.3653	18.4814	18.2604	15.9552	15.1961	15.7231	18.0719	16.3233	43.6986	42.6519	17.9885	27.3532	29.047	18.3736	32.4779	34.2443	21.3269	37.0487	42.5801	28.1752	23.6393	21.8514	22.8298	37.1182	39.5957	38.141	28.237	19.2479	29.7934	17.0755	16.5304	16.7933	18.1063	22.7258	18.3911	13.875
Seita.1G095000	24.5184	33.7705	29.4261	35.0989	33.6296	30.2786	49.6157	28.8706	50.3412	293.595	206.305	359.625	29.7046	55.5702	56.8895	38.5689	41.6691	51.1746	376.357	438.986	490.167	35.4559	47.3352	36.3023	27.6807	29.8878	65.5619	103.331	111.669	350.352	28.636	33.9941	77.7657	61.5463	47.1935	47.9914	185.137	162.797	193.494	36.2533	37.7614	61.0221	39.5018	41.4433	28.545	360.1	374.012	348.643	91.2758
Seita.1G095100	0.0367	1.83776	0.250242	0.604895	0.290914	0.468826	0.137697	0.087064	0.130687	2.5482	1.49305	2.73125	0	0.116853	0.399288	0.11914	0.135339	0.071662	2.59056	3.54013	2.59467	4.92278	4.06935	0.537074	0.074827	0.151272	0.218548	1.48762	0.932792	2.01628	2.33732	1.20784	4.68289	0.391355	0.238582	0.375346	0.825893	0.97043	1.2134	0.548298	0.081087	0.193242	0.132808	0.033155	0.089815	5.00315	4.73656	3.28424	4.51243
Seita.1G095200	0	0	0.102448	0.031935	0	0.056385	0.269573	0.769801	0.312054	0.523564	0.683774	0.487154	0.149589	0.15208	0.152974	0.165573	0.094433	0.201797	0.360674	0.633879	0.505098	0.217281	0.165083	0.186128	0.074292	0.223167	0.132257	0.218874	0.341594	0.171175	0.070713	0.320087	0.451414	0.298944	0.143213	0.341242	0.661088	0.390535	0.631612	0.407353	0.377586	0.031229	0.293238	0.228145	0.284735	0.785726	0.410849	0.832469	0.366159
Seita.1G095300	1.34011	2.01414	1.50257	2.08186	2.45039	1.89367	0.74647	1.02303	0.558901	10.5634	13.0699	7.42177	1.23632	2.31022	1.11585	0.925031	0.828262	0.757897	11.1243	7.20535	7.48844	1.39751	1.28443	1.56718	2.74277	2.77038	1.58782	5.60616	7.68157	3.07692	1.21469	2.21815	1.31368	1.35458	1.36542	1.5702	9.56585	8.37276	10.1474	1.319	1.87437	1.31104	0.505442	0.589495	0.785926	8.36017	6.83265	10.0615	1.07786
Seita.1G095400	38.604	38.275	36.7469	28.4358	37.05	37.559	42.8432	49.3801	78.0405	54.3024	58.2334	136.187	132.715	96.9563	75.8244	33.6391	26.4342	31.3613	28.1304	32.7077	29.7768	58.4653	59.0334	86.5683	84.0108	61.7196	116.518	53.2201	59.8101	257.69	87.2063	66.9464	79.6445	36.2314	37.3469	30.2745	36.0241	44.2073	38.0271	54.9515	47.1649	45.3929	20.5498	25.9971	18.3864	25.9513	28.8586	26.4216	40.1896
Seita.1G095500	0.967152	1.55292	1.86432	0.96806	0.792206	0.61075	0.42959	0.348803	0.32207	8.76779	16.214	7.87149	1.2339	2.58937	1.24684	0.336612	0.425615	0.288955	7.57411	7.38686	8.59957	2.36738	2.86277	2.77231	0.922365	0.968596	1.13297	0.882955	1.86638	4.0256	0.508003	0.759529	0.850226	0.803199	0.738068	1.03566	2.36271	2.01199	1.6736	0.712183	0.936569	1.73369	0.264738	0.198424	0.021839	6.62731	3.59925	7.11167	1.37188
Seita.1G095600	1.117	1.92764	0.683463	0.95424	1.12134	0.870951	0.716955	1.07415	0.676747	109.307	150.045	134.689	7.44529	58.0155	1.76231	0.894399	1.15869	0.868739	137.786	144.104	134.189	1.18997	3.559	5.93846	7.60669	4.07526	9.34343	91.4492	107.633	209.798	0.304985	1.20096	4.00513	7.55504	4.00743	4.09178	91.1694	77.8891	92.6052	1.98482	1.07963	7.8893	1.09876	0.786179	0.50449	143.736	159.604	166.953	18.8402
Seita.1G095700	19.7826	21.042	16.7814	16.582	17.8477	12.7487	10.518	8.1796	7.40022	11.6482	15.1661	9.19033	39.3772	51.1202	21.0719	9.19824	9.6302	8.09947	10.0732	9.95443	8.03871	14.1588	11.7477	16.8555	6.23173	7.35535	6.34957	9.39823	9.61046	4.79539	4.69104	7.68409	7.44625	4.10895	4.23173	5.592	4.62198	4.89965	4.11287	8.21354	29.2117	18.1818	3.91164	4.2783	3.62923	8.76045	8.23199	10.8594	6.42815
Seita.1G095800	6.99086	6.81266	6.84861	9.83992	8.80132	9.35353	12.1626	11.0458	14.2379	9.31614	7.50746	9.27993	5.78452	7.03699	9.0546	14.7557	12.9683	13.3766	7.23905	7.7003	8.31936	10.0867	9.15703	6.01812	14.1594	15.7631	19.0069	6.75695	8.61639	10.3125	13.6248	12.1418	15.2801	16.5463	17.5309	18.7156	8.85154	8.05418	7.17719	13.4291	14.1846	15.5606	11.2566	11.7246	12.6847	6.35262	6.1363	5.69796	9.11399
Seita.1G095900	0.803233	2.18078	2.35787	0.806243	2.40829	0.839954	0.116279	0.098624	0.032311	0.039136	0.412924	0.302594	4.18783	4.38706	10.7469	0.107968	0.266761	0.292629	0.055033	0.081622	0.029101	7.08971	6.5779	0.723267	0.471739	0.553326	0.300795	0.723657	0.798764	0.444523	4.96368	9.92492	9.21284	0.073551	0.018342	0.162112	0.051787	0.142738	0.162976	2.47487	0.923435	1.55557	0.229048	0.110936	0.104683	0.249145	0.072164	0.118267	9.18925
Seita.1G096000	24.508	23.5596	25.9676	26.5233	30.0512	29.0259	21.6315	16.8459	32.9309	24.6995	21.1385	25.9622	14.5789	13.3915	27.2971	18.728	23.9248	20.1863	16.4699	15.6933	14.9027	30.0817	32.2627	17.8813	19.0245	25.2761	41.4378	35.794	38.8957	34.0018	49.6625	28.8644	45.9207	26.7042	23.246	29.8827	28.9769	31.3402	32.1134	34.6475	29.6618	30.1575	18.8374	19.0407	19.2417	17.3207	15.0753	15.8233	25.4559
Seita.1G096100	8.1993	9.33721	6.48187	5.59557	6.34092	4.94885	2.99294	2.18819	4.00108	3.85525	2.58176	5.43835	3.44388	5.41628	7.4843	2.60045	3.94928	4.45646	5.10559	3.46518	3.79798	3.52604	4.28416	3.26021	2.63416	4.02757	5.96903	3.62825	4.31859	5.70564	4.49279	3.58246	5.40152	5.36803	5.84474	4.63798	4.76785	5.29016	4.59885	3.96386	3.76607	3.2037	4.50321	4.36576	3.30212	5.14099	5.20754	4.93926	9.2042
Seita.1G096200	54.6906	65.1208	56.0758	79.5253	55.191	75.2604	65.7969	66.3829	66.2119	73.1829	65.3911	81.2272	83.1232	64.8995	63.8434	63.4417	65.2302	63.1651	80.9197	81.8101	71.6222	82.7836	68.2958	88.8461	107.997	91.9143	79.5814	63.6889	60.6835	64.8003	53.8257	53.3813	59.6017	68.185	69.7843	69.4032	68.856	75.8735	77.2446	52.3015	63.4459	50.1825	44.2596	51.0567	52.2291	74.4783	82.9977	71.9944	86.4402
Seita.1G096300	0	0.040069	0	0	0.045335	0.04485	0	0	0.012932	0	0	0	0.026046	0.072776	0	0.027552	0.05683	0	0.066587	0.02149	0.024	0	0.042541	0	0.088371	0.035242	0	0	0	0.018189	0.248781	0.050225	0.070716	0.023399	0	0	0	0	0	0.144256	0.173895	0.077542	0	0	0.026643	0	0	0	0.073173
Seita.1G096400	37.6901	43.3313	38.2844	32.7194	36.1227	27.2311	7.75466	6.64171	6.67812	17.672	17.4305	20.1167	24.6931	31.9083	40.3527	6.31555	7.88733	8.38404	28.2318	31.0875	27.9724	45.1099	46.6064	28.3667	7.24151	9.87029	10.977	17.2013	16.2956	11.8047	96.4816	50.7051	38.8783	9.0578	7.63903	8.39839	12.8325	16.1216	16.3519	48.0169	35.3978	45.3484	10.8512	8.12355	9.12725	31.5844	34.4821	29.5884	56.6222
Seita.1G096500	21.7636	23.0134	26.196	16.9279	18.5981	16.5757	19.9348	16.8823	20.2818	43.3407	40.1791	41.5179	21.8559	28.407	21.7325	29.8947	30.6303	26.5576	85.8429	81.986	86.0443	20.9335	33.3813	27.1585	23.8755	21.2615	32.7099	23.2496	31.5529	43.1732	14.4262	16.1869	21.5967	30.4889	29.4501	34.7551	30.0536	31.556	29.9782	34.8947	27.7996	60.3412	22.7681	21.6767	21.0042	77.4828	78.5159	80.0621	44.6775
Seita.1G096600	2.80823	3.14387	3.14803	4.86248	4.02676	4.57061	1.44012	1.49474	2.54033	2.09388	2.04774	2.91453	1.31703	1.08419	2.96231	2.25298	1.96638	2.05404	2.23144	2.43522	2.23052	3.75223	3.49982	2.05703	1.79896	1.56484	3.46845	3.09468	3.0822	3.68241	2.73383	3.62968	3.9361	2.55892	2.33207	2.68921	3.00277	3.37922	3.14019	3.07143	2.30967	2.58206	1.86056	1.79706	1.97396	2.12905	1.82597	1.98908	2.82787
Seita.1G096700	0.161003	0.047801	0.19394	0.215706	0.185866	0	0	0.055252	0.211854	0.082385	0.193667	0.221303	0.233233	0.088988	0.154877	0.237857	0	0.060637	0	0.222812	0.271357	0.11419	0	0.062329	0.194263	0.154426	0.030009	0.248759	0.108049	0	0.295723	0.138477	0.188617	0.045043	0.055372	0.057165	0.159549	0.090425	0.125904	0	0.175124	0.024553	0	0.089219	0.168799	0.088923	0.211662	0.222346	0.106218
Seita.1G096800	129.592	119.895	302.621	98.7851	69.5561	84.1039	43.8506	56.0216	70.2194	153.88	128.547	169.691	26.2914	25.875	401.379	41.8655	47.272	52.0177	95.9126	84.2408	105.977	385.109	519.789	145.256	16.6656	39.909	31.2609	107.767	68.9449	65.2305	10.2292	20.2998	132.022	14.6351	15.9733	14.9435	53.4006	55.2944	57.1733	16.6692	66.0317	103.619	44.6525	43.0415	54.2686	86.7352	97.5396	108.016	113.866
Seita.1G096900	45.7129	42.3184	105.074	36.0896	28.2456	36.9367	11.3071	17.1319	13.9107	41.9473	100.276	32.4009	15.2388	17.2105	70.1124	11.5964	12.5285	11.4379	17.2122	14.0414	18.9992	152.365	154.904	61.6281	12.0561	11.0992	6.29605	32.0581	33.7006	12.9001	3.56241	8.02465	21.3271	2.91138	3.16792	3.38425	10.7761	10.9756	10.2327	6.74241	22.0827	20.4643	10.7907	9.59139	11.1153	16.5948	20.1981	24.8738	27.1385
Seita.1G097000	0	0	0	0	0	0	0	0	0	0	0	0	0	0	0	0	0	0	0	0	0	0	0	0	0	0	0	0	0	0	0	0	0	0	0	0	0	0	0.005463	0	0	0	0	0	0	0	0	0	0
Seita.1G097100	7.50663	5.78754	6.26839	9.23698	8.61676	6.03409	5.91208	2.83659	3.30052	7.64363	6.95214	7.43061	2.87648	5.4891	7.03987	5.57251	8.09558	6.41976	7.86984	6.66845	6.11262	9.8312	8.59778	4.50119	5.18936	5.53844	5.32012	13.8442	11.7962	7.97892	13.5928	4.6802	8.00762	7.91552	7.14549	9.13449	12.2894	13.6822	11.1569	7.26487	7.04774	11.4251	2.91146	4.12645	3.22449	6.52281	6.97556	5.07049	6.44209
Seita.1G097200	6.95155	7.63989	8.38796	8.5317	8.94344	8.83961	6.85897	6.99121	7.21724	9.49609	10.7327	8.38648	9.01698	8.35738	7.52732	8.20288	9.47207	7.69135	8.52538	7.1494	7.94278	11.5286	11.8915	8.60912	10.1398	10.4972	9.02167	14.5319	14.1825	9.44358	22.9187	15.4542	9.70863	7.54407	7.16292	7.49702	9.69436	12.5253	10.1973	12.2035	9.38218	9.21059	6.39598	6.77946	6.51665	7.47791	7.64045	6.85527	9.61062
Seita.1G097300	3.5289	3.6486	3.2142	7.72872	6.88653	8.0867	2.16014	1.43491	3.28507	2.19631	1.84086	2.23266	0.766108	0.824543	4.10095	2.00627	2.71213	2.52469	2.56823	2.35599	2.45765	2.53159	3.56586	1.63251	1.67174	2.45233	7.50085	3.3716	3.71488	4.75003	1.9786	1.89812	6.12127	4.6239	4.63061	5.08631	3.45714	3.24103	3.63734	1.96857	2.31454	3.66235	4.12778	2.86436	3.89009	4.51532	3.09811	3.71653	5.35246
Seita.1G097400	0.042655	0.00186	0.000519	0.401333	0.013113	0.011875	7.66388	7.68542	5.86051	9.51253	8.77868	8.47206	6.34676	4.55505	6.13246	6.27236	6.74022	6.41763	6.59657	6.39706	7.19028	13.6257	9.89623	6.62392	21.8078	17.5885	11.1371	11.9429	16.8262	10.6026	22.3452	10.029	11.5125	7.35586	6.9741	8.87935	6.48262	7.51745	6.61313	6.72371	7.56958	7.88825	0.953408	0.959035	1.42922	1.29286	2.35495	3.25312	2.41517
Seita.1G097500	0.943505	1.02939	1.4252	1.91403	1.77504	2.00287	1.2345	1.19343	1.83224	1.00699	1.01538	2.61508	0.78803	0.838827	1.65525	1.78282	1.53323	2.24217	1.4472	1.86149	1.91981	1.72356	1.65984	1.6116	2.18572	2.06919	2.64674	1.97192	1.61537	2.3859	0.898695	1.48127	2.01476	2.20899	2.4068	2.14347	1.02231	1.40045	1.47391	1.41701	1.55123	1.47638	2.05068	1.29281	1.29892	1.79237	1.48573	1.74628	1.65813
Seita.1G097600	1.76528	4.5317	1.395	0.321318	1.38541	0.323104	0	0	0	0.900763	0.97237	1.00903	7.88669	4.80445	3.34822	0	0	0	0.471177	0.187277	0.231668	3.69347	2.18165	3.30682	0.283262	0	0	0.069636	0.320165	0.231697	0	0.746339	0.203779	0.152257	0.18126	0.125449	0.26954	0.247919	0.41189	1.05932	0.641652	0.541975	0	0.048785	0	0.172773	0.475012	0.339325	3.35139
Seita.1G097700	0.522048	0.664305	0.779621	0.915089	0.89493	0.575086	0.368842	0.695424	0.331494	2.79863	2.7296	0.972447	1.31681	0.948707	0.453528	0.442376	0.344968	0.460656	1.63094	1.44009	1.10446	1.53805	1.08965	1.08409	0.985715	0.505956	1.03553	2.91757	1.78198	1.02749	1.50549	1.78175	0.466229	0.43066	0.573233	0.210425	1.62141	1.84577	1.9438	0.591185	0.467826	0.756236	0.200752	0.280607	0.43893	1.65658	1.95613	1.56351	0.881097
Seita.1G097800	19.9292	21.2853	29.9946	26.0701	21.4343	23.5583	1.94432	1.95446	2.28036	6.86455	5.7358	6.27377	6.9086	8.12574	15.1438	0.754389	0.723928	1.01655	6.08434	4.66265	5.6607	8.52268	15.3382	12.385	3.31259	1.7976	1.98777	2.7535	2.57598	1.90165	0.56416	1.4821	2.46952	6.28432	6.90296	7.85842	3.19065	5.11504	2.35496	1.93375	4.93468	4.36505	0.47211	0.499463	0.557366	7.83827	5.9541	5.702	11.1864
Seita.1G097900	8.22684	6.68015	11.4187	6.4402	9.78155	5.83136	11.9569	12.0106	13.1	10.3238	13.1296	12.8643	8.45472	9.47347	10.1564	14.6013	13.8239	14.8974	13.485	12.7265	11.471	11.9603	13.4165	9.6095	10.86	12.5877	11.5865	11.7273	11.2459	9.13959	11.0385	9.9563	10.2787	10.1175	12.3331	12.079	11.1525	11.8931	11.335	8.6535	8.04307	9.84993	14.6737	14.1688	11.8509	10.8739	15.4533	14.6526	4.74246
Seita.1G098000	64.7463	74.4724	75.1695	104.327	81.3818	96.7912	63.6392	67.9903	37.1432	84.305	117.903	63.1293	74.5319	76.2525	68.9769	67.7128	75.3698	58.5441	113.828	106.785	87.3015	150.399	131.145	87.323	93.8476	91.96	50.5968	90.6769	105.04	52.3894	176.75	118.936	61.4768	73.7749	79.1904	78.7176	103.139	103.485	109.284	88.1044	89.3669	87.4877	58.3	58.7979	55.8141	88.4933	91.9132	93.5254	132.547
Seita.1G098100	0.128675	0.099715	0.143484	0.152404	0.181498	0.08667	0.054975	0.033419	0.090373	0.48623	0.620042	0.506216	0.051599	0.110997	0.226184	0.034862	0.018891	0.137475	0.369231	0.315167	0.740381	0.148187	0.171519	0.036462	0.136757	0.081716	0.037055	0.288444	0.363426	0.194096	0.311925	0.344313	0.276319	0.09784	0.091736	0.132311	0.172677	0.192739	0.154768	0.260439	0.211724	0.207786	0.014906	0.039066	0.015863	0.269992	0.166892	0.210661	0.324112
Seita.1G098200	0	0.032162	0	0	0	0	0	0	0	0.361702	0.180068	0.378687	0	0	0	0	0	0	0.269153	0.25819	0.193757	0	0	0	0	0	0	0.177105	0.473102	0.225622	0	0	0	0	0	0	0.023124	0.170209	0.042656	0	0	0	0	0	0	0.609846	1.0288	0.673593	0
Seita.1G098300	0	0	0	0	0	0	0	0	0	0.12234	0.18838	0.117456	0	0	0	0	0	0	0.112244	0.238775	0.468733	0	0	0	0	0	0	0	0	0.017176	0	0	0	0	0	0	0	0.130109	0	0	0	0	0	0	0	0.517998	1.05614	0.417592	0.67928
Seita.1G098400	0	0	0	0	0	0	0	0	0	0.311747	0.152326	0.959058	0	0	0	0	0	0	1.45343	1.43431	0.869616	0	0	0	0	0	0	0	0	0	0	0	0	0	0	0	0	1.98259	0.02116	0	0	0	0	0	0	0.54888	1.17379	0.144783	0
Seita.1G098500	1.3638	2.87741	0.749199	0	0.827333	0	0	0	0	0.519195	0.319537	0.814876	0.809097	1.87471	3.52963	0	0	0	0.44208	0.326815	0.437561	0.081233	0.042519	0.025517	0	0	0	0.274398	0.767435	0.447293	0.073374	0.538828	1.25424	0	0	0	0.107275	0.509058	0.091003	0.044756	0	0.344784	0	0	0.022347	0.627323	0.684167	0.572589	1.53777
Seita.1G098700	0	0	0	0	0	0	0	0	0	0	0	0	0.291333	0.05343	0	0	0	0	0	0	0	0	0	0.056512	0	0	0	0	0	0	0	0	0	0	0	0	0	0.051818	0	0.09813	0	0	0	0	0	0	0	0	0.093672
Seita.1G098800	7.70597	6.33504	10.8935	11.5229	12.7662	10.7447	19.8638	17.0175	15.1295	5.79776	3.85742	4.95669	2.45343	4.20736	7.9403	2.85001	1.02357	0.729247	0.631706	0.089401	0.227536	0.521978	0.492107	0.462887	9.13658	11.1783	14.6859	0.793849	0.214293	0.438491	1.44595	4.41987	3.60332	1.45402	2.25636	1.34235	0	0.344961	0.095889	0.421113	0.630812	0.714111	10.1235	9.39008	12.8121	3.24988	3.10159	3.06676	3.29438
Seita.1G098900	36.2304	34.554	35.0867	18.8018	21.9808	16.6952	0.511067	0.916421	0.745558	3.52781	3.83358	5.04259	16.1436	21.5392	37.4209	1.29225	1.08926	1.27708	2.0088	1.89779	1.05056	18.0001	18.1771	19.0116	0.64887	1.01669	0.46675	3.46236	3.0371	1.95728	5.47983	4.06873	9.63812	0.506992	0.396761	0.551092	1.04344	0.993263	1.10156	3.91611	8.10704	6.12017	0.817908	0.714942	0.544085	2.57724	3.53924	2.98049	21.5897
Seita.1G099000	9.97263	10.0904	10.5993	12.5448	12.9194	12.2876	7.07346	6.91392	5.31835	17.7298	15.701	16.4467	14.8068	18.2089	11.1153	9.54413	8.63845	8.08959	13.2876	15.0264	14.6062	15.2908	14.1232	18.0246	13.9403	13.4894	8.86985	16.2379	19.0626	12.5137	40.1169	31.8039	15.8991	11.1054	10.3981	12.0295	18.4517	17.7092	17.6008	33.2087	19.9236	20.4254	4.9869	4.95939	4.87221	13.8421	12.3117	11.9038	11.5607
Seita.1G099100	5.14777	7.26588	3.08312	0.047548	1.16165	0.234357	0	0	0.020045	0.094919	0.20101	0.329567	1.24317	2.08724	2.91727	0.036399	0.069497	0	0.109528	0.331914	0	3.98271	4.23147	6.07149	0	0	0.022172	0	0.083385	0.017376	4.68888	15.374	3.29316	0	0	0.051051	0.064471	0.076302	0.095781	4.53161	0.764503	0.603692	0.026614	0	0	0.436987	0.515842	0.238043	10.2869
Seita.1G099200	10.1248	10.3926	8.79112	19.7491	17.8662	17.339	14.2347	13.9859	13.159	33.2805	33.6916	30.6952	7.20357	8.93688	7.73523	17.9931	17.0196	19.6491	56.9338	54.7132	55.1362	10.0601	10.9609	10.8374	18.3128	19.1126	16.6342	50.9699	51.2012	39.8754	19.8274	28.6793	21.1907	22.2778	25.7299	19.1352	81.7268	89.031	82.5103	34.4878	29.4451	28.4094	16.9655	17.0672	17.1945	56.9651	60.0632	57.6374	11.7059
Seita.1G099300	39.6578	46.4559	55.4518	61.9525	58.7109	62.7039	62.2891	67.6003	46.11	71.2267	88.1427	57.3091	54.2314	38.451	40.0555	83.5844	69.2957	64.6452	56.718	53.6396	56.7783	108.472	91.6654	73.3101	111.66	102.59	60.8787	86.7476	73.8632	58.6148	111.23	67.8829	48.6156	60.4839	61.793	62.3603	72.3181	64.3338	69.171	72.5219	55.9029	53.069	38.4703	55.6728	42.5702	46.7406	47.9254	54.8995	50.406
Seita.1G099400	13.304	12.7597	14.91	10.5623	17.7036	12.7915	39.8747	36.1591	32.6725	1.07042	1.4747	1.00938	11.0424	10.5966	15.7486	40.0266	43.7284	28.3711	0.421095	0.306674	0.809444	22.4134	22.3103	10.3468	48.0543	53.5276	44.3934	1.83353	2.51352	1.01419	38.5024	15.5064	14.413	53.304	61.3271	53.2055	1.50541	1.20212	1.18794	11.041	11.8734	12.4118	44.6837	48.8655	41.9559	0.293224	0.345383	0.695781	23.5054
Seita.1G099500	0.208541	0.498623	1.28715	0	0.296083	0.146887	21.1388	22.083	14.5384	0.245343	0.168109	0.130567	0.212179	0	0.537646	12.1447	11.9253	8.21574	0.091896	0.170371	0	1.54974	1.28767	0.369889	8.89712	4.82082	3.30028	0.400844	0.167476	0.173894	14.7219	2.16278	1.70665	17.6378	34.5232	19.3061	0.556618	0.423169	0.698563	1.10489	1.04673	0.911345	23.1996	22.5156	22.8758	0.067249	0.216066	0.061766	0.317559
Seita.1G099600	2.17275	5.19146	1.66385	31.8006	11.6634	24.1967	8.95465	9.91124	8.74898	8.81154	11.1196	8.99208	8.67142	7.32328	13.1265	9.28181	9.51843	8.92541	6.59484	5.51759	5.78909	16.3008	23.4781	31.58	42.2512	52.6065	21.7008	31.8348	30.1813	13.8793	179.166	96.7174	61.8651	27.5678	26.6326	34.1905	24.4291	24.3559	18.194	92.8796	57.7086	69.268	3.68492	4.39555	2.68782	3.19183	2.05214	2.66514	6.43641
Seita.1G099700	0.683819	1.40881	7.20083	1.14303	4.39544	2.26646	2.90729	3.29086	0.859914	21.3026	3.98668	2.52951	29.9333	1.84621	1.20843	0.898401	1.0768	0.516413	0.775559	0.318195	1.58458	4.0267	0.09421	2.76101	132.885	19.2789	26.5511	55.6867	62.7854	19.7037	541.669	297.415	88.9703	26.9072	0.095156	36.0386	0.760844	33.0594	20.9593	180.532	88.5446	7.56572	2.28103	0.943781	7.92786	1.02851	1.33203	0.078706	1.47097
Seita.1G099800	5.12481	6.07884	7.16409	6.42001	7.93326	5.97805	6.76371	5.84915	8.23686	5.48887	7.01702	6.84211	4.21452	3.91514	7.96439	8.27267	6.96338	9.12462	4.73586	3.17656	5.70313	7.66079	6.3287	4.04207	4.48791	3.43107	7.4226	5.71519	5.44082	6.55323	11.5773	14.6888	12.2419	6.91237	6.07153	6.8048	7.04222	7.23552	5.48637	8.77373	6.85513	6.59759	5.58291	6.84895	5.86485	4.90033	4.52083	4.3058	6.37437
Seita.1G099900	1.56073	1.6724	2.17444	3.43817	3.16105	3.11202	1.00019	0.852676	2.06639	1.98356	1.21665	2.07096	0.439639	0.436501	2.24036	1.4645	2.04579	1.71762	1.88701	1.67578	1.57889	1.33703	1.54033	1.39041	0.536079	1.15119	2.51518	2.66707	2.61599	2.05158	1.43662	0.894439	2.59422	2.56286	2.45498	3.03128	1.92149	2.05377	2.28397	1.25368	1.20188	2.02958	1.75829	1.38502	1.82384	1.8118	1.45608	1.50529	2.17604
Seita.1G100000	11.6396	11.365	11.8721	11.137	19.2315	10.3334	7.67712	5.75849	7.28489	1.16593	1.22406	0.817679	1.08647	0.825318	3.73383	23.2545	28.1675	24.0188	1.24714	1.53635	0.527814	5.60793	5.07071	2.21283	2.87023	6.86501	8.04635	1.16274	2.63661	0.791683	1.54598	1.95392	3.74034	19.0475	22.9298	22.7298	1.46662	1.02677	0.528406	3.83813	6.76372	11.2716	33.279	31.77	35.0498	1.06408	0.633129	0.350967	8.0691
Seita.1G100100	0.145105	0.427127	0.252331	0.359355	0.428527	0.18201	8.01454	10.5272	6.17511	2.15079	2.51178	0.810076	3.90704	2.08194	3.21651	42.3922	44.6408	37.6171	1.31439	1.09561	1.17577	12.8482	13.7645	8.37693	12.3856	13.048	6.39997	1.97413	3.0223	1.18332	5.91324	3.38043	2.39767	22.0484	26.5024	24.2573	1.32587	1.00802	1.66839	11.7187	10.1677	12.4042	1.23311	0.575147	0.663822	0.418328	0.535608	1.30187	0.296921
Seita.1G100200	0	0	0	0	0	0	0.355303	0.478973	0.706465	1.06221	0.152781	0.748689	0	0.192077	0.902643	0.280837	0.947619	0.392536	0.198112	0.493391	0.384899	0.875	1.83696	1.00957	0.563254	1.54467	1.49423	1.69501	2.42638	0.703095	1.27284	1.45756	0.819704	0.945029	0.961115	1.32662	0.740832	0.740564	1.23221	1.41157	0.633753	1.47202	0.626278	0.816728	0.245678	0.636017	0.177868	0.406912	1.04267
Seita.1G100400	9.19157	7.21691	7.83355	7.4186	9.09508	7.3198	11.3841	11.8736	7.70779	12.4809	16.2953	11.349	23.2393	21.292	17.4353	5.77067	5.17402	5.39081	0.218257	0.579645	0.435239	11.5545	6.2667	5.75674	9.17597	10.5318	7.12804	13.0765	12.9424	6.86932	30.1755	18.8579	12.1151	5.44312	2.85381	4.35102	1.04775	1.46286	1.14201	6.19704	5.95969	4.49179	6.61461	5.22074	5.96874	2.09439	2.0017	1.60982	9.56934
Seita.1G100500	0	0	0	0	0	0	0	0	0	0	0	0	0	0	0	0	0.048916	0	0	0	0	0	0	0	0	0	0	0	0.098229	0	0	0	0	0	0	0.062143	0	0	0	0	0	0.061259	0	0	0	0	0	0	0
Seita.1G100600	28.1064	28.5399	28.1533	34.6421	31.5947	28.982	9.81664	9.35118	7.02079	21.6228	20.984	15.9232	20.0751	24.8105	20.5555	11.4738	12.6877	12.3993	21.2119	19.2981	18.5878	19.896	22.4438	23.3656	16.7866	17.7493	11.7988	28.3582	27.8917	15.0747	20.0535	21.4073	18.7316	19.7972	17.3329	20.3976	26.9612	33.0179	31.9446	24.5692	27.8804	23.6162	9.42959	9.90211	9.81936	17.8564	18.3743	19.7886	23.7156
Seita.1G100700	4.28939	3.06376	4.73386	6.25744	7.01633	6.00644	4.80396	4.88787	4.3384	6.16227	6.21696	6.01611	4.37481	4.15397	3.67194	6.55811	7.05622	6.75289	6.35579	7.10775	6.40883	6.21087	7.29648	4.55129	9.80823	8.58087	8.2287	8.63831	11.0751	7.24426	5.86118	6.82437	5.18188	8.91165	9.92862	9.44541	11.145	11.001	11.6319	8.21879	6.97784	6.3754	4.05839	5.33894	4.64811	6.37468	5.22256	5.39108	4.40906
Seita.1G100800	4.77023	3.64294	5.79824	6.19325	7.62275	5.58069	5.38844	3.5818	5.49828	3.20729	3.42968	2.70175	2.11997	2.28762	4.5687	6.57399	6.27152	4.27021	3.62452	3.72115	3.0847	4.6564	6.574	3.80931	3.9558	4.98958	7.28351	4.51822	4.16737	3.93569	4.7506	4.38915	6.22948	7.48744	7.31835	6.99354	5.47561	5.36835	4.57443	5.48438	5.39802	6.92459	6.14059	5.35235	5.92661	3.41135	3.41924	3.71685	3.65947
Seita.1G100900	1.93707	2.08199	2.13773	4.15009	3.03663	3.27901	2.27959	2.37463	2.1874	3.39561	3.21886	3.46023	3.30655	2.48869	3.46777	4.25663	3.43262	2.96	2.92291	4.13938	3.3432	4.0453	4.7873	2.92279	4.56478	5.57419	4.86304	3.08114	2.67671	2.77296	1.81892	2.81788	3.76591	5.18988	5.37735	3.94145	3.8676	3.73426	3.90896	1.97316	3.15499	2.15021	2.03577	1.52553	1.70352	3.10852	2.77651	2.32358	2.41159
Seita.1G101000	13.0859	14.4265	11.1681	7.80112	10.9378	9.14905	23.4424	21.1089	18.2928	13.1208	13.0963	9.58789	14.7622	13.4339	9.77396	21.3083	28.9931	25.7218	12.6005	10.4093	11.1197	16.1147	13.7109	13.8578	14.2243	14.8966	8.79098	12.4575	15.8192	9.4946	27.0992	14.5337	10.7433	15.1537	16.3988	15.8538	15.869	16.1506	16.4378	17.9049	21.1538	21.4259	26.6134	23.1133	19.5608	9.54787	7.52389	9.97042	11.5685
Seita.1G101100	32.0076	31.092	35.6134	37.6837	37.4261	36.9346	24.3217	26.1796	20.2448	27.7537	29.9113	22.8642	32.892	30.4634	26.1546	31.9638	29.0033	27.733	27.6789	25.9693	25.9313	40.7122	37.6149	41.6183	25.8728	28.3487	22.1336	29.5977	27.283	18.2256	49.7803	37.7261	28.0932	30.3449	31.6936	33.1367	35.8393	36.2396	38.1237	68.8654	51.8339	46.3682	18.1184	22.5527	21.3283	25.1816	24.9278	22.6325	29.181
Seita.1G101200	131.638	97.7824	166.557	130.074	137.867	130.281	182.897	345.293	214.8	133.254	180.707	152.659	91.8534	135.249	245.215	172.928	183.561	153.367	51.768	45.8358	67.5065	142.139	138.337	273.17	419.412	703.081	416.583	605.968	527.412	506.199	145.66	196.397	183.548	134.427	152.487	143.695	238.418	270.534	325.721	148.752	323.625	174.303	184.883	181.759	141.759	26.1475	35.6398	45.6818	55.7716
Seita.1G101300	11.6676	12.7585	12.269	10.9589	10.7086	12.6168	10.8676	11.781	10.171	15.2647	13.5862	13.0619	13.0362	11.1814	10.5269	14.1917	12.6971	10.9282	19.6543	18.0561	15.7148	18.1824	14.6295	14.6909	22.8768	22.7206	13.7475	16.7597	15.3803	12.9459	18.9535	13.1185	9.69139	14.3073	16.4922	17.3069	19.9664	18.3544	18.6561	13.1711	13.3184	10.1682	8.24646	11.279	10.2863	16.1818	16.531	14.6633	11.6749
Seita.1G101500	13.5924	15.1435	17.0776	28.4356	22.3447	29.6525	28.4571	27.2532	28.9623	17.1467	13.9271	15.9377	13.5603	9.30783	14.8368	40.8441	42.348	35.4506	20.1381	17.247	15.6572	15.8147	17.4383	16.6251	41.4233	42.9901	32.3986	15.3477	13.6751	11.9204	13.9404	13.2395	17.1196	35.6063	37.7359	35.8315	16.8031	17.3159	17.0418	15.1817	21.9418	18.4144	27.9862	27.2511	34.8635	14.2927	13.2812	14.6448	12.3123
Seita.1G101600	2.55644	2.76837	3.21576	5.4238	3.94364	4.89874	2.74699	1.86389	4.54528	2.92258	2.49959	4.20467	1.15916	0.971242	3.48979	3.57514	3.32249	3.33986	2.95895	3.38976	2.57142	2.89732	3.3142	2.14883	2.48526	3.33788	6.57243	3.79733	3.64474	5.31471	1.57999	3.11103	5.06686	4.92211	4.32712	4.41013	3.71345	3.97331	3.82533	3.18202	3.10956	3.7772	3.62944	3.01896	3.64194	2.99755	3.06191	2.74424	4.18375
Seita.1G101700	5.04061	5.34468	6.01976	5.62544	5.47894	5.4965	12.9124	12.5915	11.6301	7.07965	8.17006	5.57525	6.92796	6.56087	5.3431	14.7037	16.1067	13.0831	6.0387	5.12145	5.13708	7.25726	7.03554	6.27039	13.5346	12.7916	11.2246	7.32777	8.01637	4.94349	5.33347	5.34198	4.62104	10.934	11.3305	11.2315	5.63001	5.17651	5.31482	5.97483	4.98899	5.54599	12.2736	13.4316	14.115	5.46632	5.8868	5.92673	4.5165
Seita.1G101800	16.8494	17.6238	15.8765	19.182	18.3338	21.4727	12.1381	12.3935	12.451	14.6443	10.7626	14.4645	13.0581	13.809	13.3618	17.2698	13.9003	14.5832	13.4733	16.6633	17.7041	13.3219	14.8992	12.524	15.9235	16.4361	15.9543	12.0822	12.4666	14.7817	9.10577	11.3247	13.5261	13.692	14.9701	15.087	15.2574	18.5451	17.4031	13.9415	12.948	15.4517	10.3327	11.0374	10.7888	16.4984	16.3583	15.6995	19.4395
Seita.1G101900	12.4013	17.4456	1.78762	0.029356	6.14504	0.026864	0.08522	0.260207	0.140925	2.2953	1.14186	1.807	9.51041	11.9435	5.67106	0.103143	0.177053	0.154777	2.36643	2.8408	1.16727	31.0867	24.4778	1.60082	0.22473	0.307836	0.192815	0.842056	1.21784	0.49326	14.8122	9.40447	1.78589	0.207012	0.031327	0.294138	1.0806	2.35567	0.927844	4.8094	1.66626	3.99522	0.135303	0.054516	0.148943	0.712065	1.88925	1.18871	22.3961
Seita.1G102000	0.696578	0.876245	0.962181	1.61588	1.28412	1.62775	0.435511	0.48657	0.788155	0.290837	0.600345	0.501009	0.097137	0.337826	0.521399	0.718064	0.481997	0.726468	0.29221	0.485126	1.48943	0.550766	0.751777	0.313744	0.467959	0.697187	0.3931	0.006434	0.462886	0.961251	0.013419	0.552841	0.675217	1.65836	0.440633	0.576467	1.31243	0.898193	1.08354	0.373324	0.488166	0.906927	0.658535	0.663815	0.640857	0.205355	0.681383	0.976735	0.537337
Seita.1G102100	40.2404	29.4864	34.1822	38.8631	37.5095	37.8372	23.8801	15.9179	23.9402	49.0592	45.085	47.9249	28.4344	24.0243	26.8288	26.9821	31.402	29.5439	92.1754	95.7518	89.1325	19.8838	30.7306	27.4298	17.0147	20.2519	29.6738	22.2716	26.519	29.2494	20.5616	23.9465	24.5686	30.597	28.9604	24.8744	26.5512	35.9684	30.5263	21.1578	27.2195	34.0548	30.3895	27.7207	30.1075	53.8191	66.9591	67.36	23.3577
Seita.1G102200	0	0	0	0	0	0	0	0	0	0	0	0	0	0	0	0	0	0	0.085591	0.092596	0	0	0.013224	0	0	0	0	0.013543	0.035178	0.021995	0	0	0	0	0	0	0	0.042187	0	0	0	0	0	0	0	0	0.021473	0	0
Seita.1G102400	8.70898	8.40507	9.9521	12.7526	10.7896	12.2631	9.36126	11.0397	8.00627	8.66258	11.3527	6.7312	9.74995	9.87141	8.45664	10.7366	10.6792	10.1818	8.24279	7.73881	7.75498	14.9998	12.4245	10.8835	14.0947	13.7206	9.29044	11.8384	11.1532	8.27228	13.946	12.9482	9.5882	11.0971	11.5055	11.4899	9.65305	8.90711	9.15313	12.6243	12.0436	12.3988	7.89836	9.66124	7.89027	7.40787	8.12797	7.57537	9.1557
Seita.1G102500	37.3721	37.4583	33.9762	80.7566	80.2258	83.5068	51.9519	56.2747	41.6344	25.4195	20.9441	18.0622	54.5767	38.3437	34.1829	80.9237	77.3071	71.753	22.1581	20.1764	20.6954	40.0637	37.4996	42.9644	134.671	141.045	93.4383	15.422	15.5542	10.3647	63.4025	58.1662	54.9187	108.774	119.847	118.859	14.3945	14.421	15.2166	47.0515	74.1425	61.5003	62.1432	55.0582	56.4069	14.8776	13.9133	15.5113	40.9901
Seita.1G102600	0.048305	0.126604	0.176934	0.508357	0.216253	0.189077	0	0	0	0	0	0	0	0	0	0.258212	0.06449	0.035702	0.56365	0.279745	0.400048	0.076523	0.040763	0.10351	0	0	0	0	0	0	0	0	0	0.429018	0.219661	0.164658	0.411746	0.285386	0.505231	0.067043	0.422189	0.358935	0.065346	0.093531	0.11687	0.334383	0.303018	0.178528	0
Seita.1G102700	0.393925	0.22857	0.563792	0.641992	0.765918	0.546624	0.304603	0.328814	0.15545	0.18683	0.022527	0.111934	0.291751	0.229273	0.274121	0.248061	0.249588	0.240952	0.212521	0.021889	0.100345	0.588006	0.57126	0.319747	0.467145	0.55345	0.358577	0.145469	0.482236	0.12988	0.269928	0.242558	0.300837	0.2647	0.318803	0.219719	0.044442	0.114502	0.178497	0.178848	0.914473	0.440645	0.233353	0.269365	0.18576	0.255483	0.339968	0.195006	0.485126
Seita.1G102800	0.30332	0.226158	0.080853	0.17825	0.100628	0.102304	0	0.016764	0.017278	0.048994	0.074893	0.027446	1.48244	0.676717	0.432747	0	0	0	0	0.051267	0	0.490466	0.667338	0.233313	0.007073	0	0.128251	0	0	0.043987	0.126828	0.900988	0.480323	0	0.064063	0	0	0	0	0.245363	0.160576	0.160478	0	0.064428	0	0	0	0	0.57975
Seita.1G102900	21.0289	19.9098	21.024	16.9799	22.254	18.9059	17.6221	15.0768	18.7814	12.3045	12.9211	11.8169	15.6954	13.1101	21.3762	16.6322	17.6825	16.528	9.02477	8.09732	8.80143	18.1111	19.3356	13.2113	15.0307	16.9222	23.8094	14.7663	17.4606	11.3513	35.8018	19.9898	25.1078	18.9163	18.508	19.9445	13.6884	14.0237	13.5367	24.0002	22.6185	23.3717	16.0174	14.4901	16.7494	11.1647	9.56516	9.01036	17.0676
Seita.1G103000	0.195007	0.219502	0.06558	0.595836	0.287677	0.370494	0.189583	0.084573	0.051882	0	0	0	0.043966	0	0	0.139064	0.04191	0.139224	0	0	0	0	0.036249	0.082526	0.403411	0.237167	0.794641	0	0	0	0.09023	0.098916	0.04759	0.548784	0.436778	0.373122	0	0	0	0	0.144032	0.039982	0	0	0.044824	0	0	0.031677	0
Seita.1G103100	5.43917	4.54091	5.88546	7.13037	6.63731	6.00364	3.59812	3.05859	4.60128	5.86678	6.01565	6.69807	5.1641	4.9723	7.35846	3.44084	3.45713	3.72576	5.24415	4.84705	4.96917	4.66197	5.57424	4.32608	4.66237	4.54762	6.66992	5.1456	5.94113	6.07675	4.72691	5.15721	6.92926	6.16628	5.72368	6.28955	5.80812	5.89481	6.89047	4.81628	4.71899	5.85777	3.60857	2.81257	4.19012	5.29935	4.59357	4.70611	4.47002
Seita.1G103200	177.023	161.161	170.171	126.502	195.056	130.635	216.168	166.184	190.612	50.7209	51.5506	46.7379	175.927	163.139	167.574	136.491	153.732	156.44	43.2679	38.7206	41.3113	148.735	147.042	132.559	113.638	138.287	126.664	93.8996	85.4927	57.6568	186.204	296.995	273.141	157.005	149.021	158.635	99.8269	94.6023	98.908	311.12	281.944	358.682	236.084	195.336	185.691	42.0688	43.8438	39.7721	107.54
Seita.1G103300	8.08526	8.21654	7.8151	15.9128	14.8573	16.4851	23.8729	22.6856	18.2955	2.70386	3.76114	2.26378	8.99315	7.25392	6.84729	33.2497	33.7089	27.8033	2.2982	2.53458	2.57853	7.57328	5.87681	5.72946	40.6194	42.405	31.0403	5.24055	6.90425	2.73291	4.02968	6.07925	8.33714	29.048	34.2003	27.6473	2.74659	3.17751	3.19616	5.53121	10.6783	9.29773	32.5033	30.1516	29.1563	2.80807	1.93708	1.65754	7.63647
Seita.1G103400	0	0	0	0	0	0	0	0	0	0	0	0	0	0	0	0	0	0	0	0.033815	0.021893	0	0	0	0	0	0	0	0	0	0	0	0	0	0	0	0	0	0	0	0	0	0	0	0	0	0	0.023345	0
Seita.1G103500	23.7404	26.4138	25.5411	41.0401	41.1793	43.1569	55.908	58.0205	57.5885	36.9501	35.3733	38.9036	35.2064	32.5405	33.1482	69.3502	65.146	57.0273	41.5373	38.8292	34.5932	49.2694	42.4202	32.5248	87.2657	79.0857	69.7219	41.2529	45.7028	41.9053	91.2852	67.9423	59.8446	77.4237	79.387	77.5518	49.9995	54.051	52.5664	70.8571	56.0334	58.1495	60.1696	52.4764	59.5864	39.1776	37.7184	37.6066	27.0732
Seita.1G103600	0.688994	0.566809	0.339118	1.44931	1.26381	1.5788	0.051521	0	0.119797	27.1843	22.4665	22.2937	1.34428	1.69253	0.938753	0	0	0.032147	17.6197	21.2529	18.7975	0.352197	0.33519	0.92358	0.30874	0.205085	0.320978	6.19086	6.66527	5.22206	0.504829	1.08017	1.30116	0.159348	0.20363	0.167241	4.98148	5.66186	6.00943	1.34667	3.1135	2.01254	0.024824	0	0	23.9782	20.3488	20.4602	0.323225
Seita.1G103700	3.37392	5.0594	1.89674	0.344685	1.59142	0.743934	0.342812	0.296157	0.063873	21.2976	19.058	20.1155	3.53737	3.82545	3.75455	0.262048	0.110519	0.34268	17.0564	21.9257	21.0045	7.45489	4.80302	3.76849	0.477908	0.529963	0.217212	1.30248	1.87199	2.67438	16.5834	6.61621	2.88029	0.40331	0.139749	0.227336	1.23156	2.11469	1.89557	10.2057	8.95682	8.41603	0.106623	0.224529	0.083622	27.7225	24.5758	20.9882	9.66773
Seita.1G103800	178.16	145.696	129.426	112.077	115.405	93.3659	4.04686	1.90386	2.50877	37.9515	42.6277	34.7607	144.331	238.023	120.715	2.11971	2.76944	4.15193	29.9122	31.7198	33.4047	48.8085	52.3671	162.402	1.73709	4.40904	3.3758	25.8503	24.1233	11.4456	5.74058	30.2492	33.4652	1.44045	1.14751	2.6001	5.30391	8.5559	6.29078	17.5558	121.327	67.3997	6.80243	7.59091	3.10355	34.749	41.7125	32.8532	53.3687
Seita.1G103900	0.306543	0.243291	0.152636	0.347453	0.295259	0.273526	0.011628	0.098396	0.013927	0.241067	0.081926	0.155005	0.481208	0.474398	0.153657	0	0	0	0.15872	0.099881	0.025569	0.544851	0.198212	0.398204	0	0.025546	0.059572	0.307615	0.299147	0.064603	0.503201	0.26096	0.263934	0.129729	0	0	0.068594	0.165238	0.107045	0.272961	0.977779	0.76062	0.025079	0	0	0.208469	0.146696	0.195272	0.193708
Seita.1G104000	0.348754	0.175711	0.035641	0.059569	0.164546	0.112503	0.375221	0	0.152255	0.393352	0.275515	0.124319	0.377838	0.130065	0.949903	0.066394	0.26385	0.361752	0	0	0	0.603036	0.746123	0.15988	0.545155	0.230971	1.51138	0	0.028051	0	0.361343	0.618788	0.920938	0.156754	0.221575	0.357637	0.063522	0	0.117962	0.398358	0.452202	0.688336	0.054029	0.080849	0.177198	0	0.384662	0.106773	0.47204
Seita.1G104100	0	0	0	0	0	0	0	0	0	0	0	0	0	0	0.06174	0	0	0	0	0	0	0.065556	0	0	0	0	0	0	0	0	0.27965	0.069089	0	0	0	0	0	0	0	0	0	0	0	0	0	0	0	0	0
Seita.1G104400	0	0	0	0	0	0	0	0	0	0	0	0.030527	0	0	0.030372	0	0	0	0	0	0.026899	0.028635	0.180321	0	0	0	0	0	0	0	0.071475	0	0	0	0	0	0	0	0	0	0	0	0	0	0	0	0.028504	0	0
Seita.1G104600	0	0	0	0	0	0	0	0	0	30.7013	15.1527	14.6192	0	0.188439	0	0	0	0	35.4673	58.1314	46.6672	0	0	0	0	0	0	0	0.139002	0	0	0	0	0	0	0	0.792876	0.138388	0	0	0	0	0.175511	0	0	124.241	125.468	121.994	0
Seita.1G104700	0.266923	0	0.066457	0	0	0	0	0	0	278.056	242.999	146.618	0	0	0	0	0	0	315.181	387.152	267.695	0	0	0	0	0	0	0.895465	1.90238	8.18819	0	0	0	0	0	0	7.19008	3.02948	10.7595	0	0	0	0	0.061762	0	329.615	283.094	298.045	0
Seita.1G104800	0.09131	0	0.104563	0	0	0	0	0	0	38.1715	38.5822	21.6424	0	0	0	0	0	0	53.6415	59.9966	58.6956	0	0	0	0	0	0	0.155404	0.415527	1.22832	0	0	0	0	0	0	1.83099	0.620986	3.42257	0	0	0	0	0	0	108.126	105.192	84.031	0
Seita.1G104900	0	0.173749	0.080091	0	0	0	0	0	0	12.5538	15.068	6.9446	0	0	0	0	0	0	12.8232	14.0662	15.101	0	0	0	0	0	0	0	0.158779	0.271737	0	0	0	0	0	0	0.225677	0.199576	0.324795	0	0	0	0	0	0	34.2036	33.2784	30.9434	0
Seita.1G105000	0	0	0	0	0	0	0	0	0	0	0	0	0	0	0	0	0	0	0	0	0	0	0	0	0.187568	0	0	0.140077	0	0	0.138907	0	0	0	0	0.166137	0	0	0	0	0	0	0.311773	0	0.045392	0	0	0	0
Seita.1G105100	1.37767	1.84396	3.07951	1.35332	1.02855	1.4058	1.55798	1.39983	1.72563	1.93681	3.75495	2.48489	4.55144	5.48909	2.50638	1.16498	1.76042	2.76642	2.5699	2.78103	3.47597	1.20629	0.958408	1.97998	3.93485	3.00573	3.52309	4.06031	5.04376	4.9659	7.77513	2.85102	1.89999	0.937287	1.67713	1.68973	5.1079	3.03902	2.8944	1.251	1.25477	2.89376	1.4235	1.38733	1.47889	4.22282	3.91106	3.5111	2.92044
Seita.1G105200	1.76532	0.967696	1.7107	1.29609	1.67245	1.9767	0.767192	0.728449	0.477367	1.01279	1.01428	0.518061	0.706477	0.18397	0.374808	1.0396	1.63577	0.602985	0.801443	2.07707	1.06553	0.895435	1.14287	0.538881	0.658438	0.940833	1.04462	1.18974	1.73075	1.79721	0.414077	0.598638	0.861927	0.409978	0.727046	0.35628	0.256054	1.01846	0.460572	0.646452	0.634392	0.402997	0.338894	0.145688	0.492192	0.196594	0.59017	0.184914	0.202172
Seita.1G105300	0	0	0	0	0	0	0	0	0	14.2225	10.1026	8.32203	0	0	0	0	0	0	15.9196	25.0177	28.4309	0	0	0	0	0	0	0.196791	0.155081	0.49622	0	0	0	0	0	0	1.1725	0.354837	1.42947	0	0	0	0	0	0	46.8878	46.9591	35.0102	0
Seita.1G105400	0	0	0.24321	0	0	0	0	0	0.170378	79.413	61.6371	36.2163	0	0	0	0	0	0	129.454	126.098	161.905	0	0	0	0	0	0.109773	0.241896	0.253727	0.751341	0	0	0	0	0	0	1.01781	0.392119	0.346625	0	0	0	0	0	0	262.347	259.366	198.278	0
Seita.1G105500	0.534232	1.18482	0.721585	0.010803	0	0	0	0	0.357075	1932.88	1899.18	993.871	0	0	0	0	0.261655	0	2324.12	2618.97	2459.37	0.221112	0.105978	0.529381	0	0.972435	0	4.99796	20.832	37.2332	0	0	0	0	0	0.210432	45.0893	35.3287	71.6352	0	0	0.393138	0.668505	0.164956	0.284251	2995.08	2453.11	2712.84	0
Seita.1G105600	0.170612	0	0	0	0	0	0	0	0	68.6544	79.3975	24.4962	0	0	0	0	0	0	62.9318	41.2855	160.647	0	0	0	0	0	0	0	0	0.126229	0	0	0	0	0	0	1.1157	0.46331	4.44792	0	0	0	0	0	0	214.95	224.737	191.447	0
Seita.1G105700	0	0	0	0	0	0	0	0	0	6.06051	5.21761	2.72141	0	0	0	0	0	0	23.3094	38.571	29.9137	0	0	0	0	0	0	0	0	0.2716	0	0	0	0	0	0	0	0	0	0	0	0	0	0	0	22.8701	14.8051	37.7643	0
Seita.1G105800	0	0	0	0	0	0	0	0	0	31.244	26.2464	13.8219	0	0	0	0	0	0	30.5434	31.5189	35.1734	0	0	0.180351	0	0	0	0	0.212077	0.340405	0	0	0	0	0	0	0.663616	0.551925	0.32714	0	0	0	0	0.056097	0	101.457	93.0088	88.301	0
Seita.1G105900	0	0	0	0	0	0	0	0	0	1.05716	0.238786	0.831938	0	0	0	0	0	0	0.932936	1.0619	1.20263	0	0	0	0	0	0	0.016037	0	0.032448	1.58035	0.035347	0	0	0	0	0	0.086684	0.027468	0	0	0	0	0	0	2.55563	1.82744	1.61832	0.035657
Seita.1G106000	0	0	0	0	0	0	0	0	0	0	0	0	0	0	0	0	0.286754	0.078291	0	0	0.030886	0.47844	0.27574	0.158881	0	0	0	0	0	0	0	0	0	0.029578	0.06271	0.227276	0	0	0	0.243574	0.126771	0.308749	0	0	0	0	0	0	0
Seita.1G106100	27.6617	29.0495	23.4901	35.3383	30.5073	38.5455	55.5383	66.5863	41.011	31.8428	27.4364	25.8915	27.6239	30.4082	21.536	50.3884	49.3068	44.2861	30.9146	29.0461	31.4676	27.7189	28.2712	37.1564	91.2149	90.8545	52.2975	30.8491	31.3883	21.0892	97.5192	71.3056	38.4255	59.7527	65.7298	64.1212	29.1621	32.3127	31.7499	52.8781	36.9748	29.1668	47.6671	48.227	49.409	30.5883	32.1408	34.6373	25.8088
Seita.1G106200	0	0	0	0.318867	0.187398	0.15351	0	0	0	0.332492	0.156045	2.05331	0	0	0	0.031812	0	0.021232	2.78742	0.886047	2.14831	0	0.035116	0	0	0.054253	0	0.133777	0.088605	0.046527	0	0.153993	0.228181	0	0.019647	0	0	0	0.026136	0	0.100935	0.257308	0.000575	0.116364	0	2.18949	5.82724	2.73074	0
Seita.1G106300	2.04031	1.44479	1.46666	0.310239	2.00248	0.307695	4.36239	4.99153	3.80337	7.5333	8.94358	5.84573	5.63414	6.46181	4.79316	6.38727	6.11315	4.60001	6.73263	4.69738	5.18036	7.41397	7.17461	7.1366	7.31055	6.87931	4.46577	9.30736	8.80989	4.34568	10.1708	9.59542	5.84825	5.14121	5.74348	7.05608	6.42025	5.91994	5.59165	8.38032	8.94869	7.54117	3.98928	3.9971	4.01467	7.57212	5.85193	6.08233	3.96922
Seita.1G106400	0.443256	0	0	0	0.763956	0.468425	1.27594	0.418744	0.555267	9.40557	8.82886	5.97214	0.904548	0.92324	0.76676	0.634879	1.04182	0.665713	9.51665	9.05484	7.81218	0.557145	0.901115	0.830211	0.785626	1.41581	0.786333	5.72252	3.9049	3.05083	2.78659	1.46859	0.991946	0.287287	0.760891	0.771254	3.96892	2.47953	3.46713	0.877351	0.340708	0	0.420408	0.671189	0.597835	7.39036	9.15039	10.5177	0.507612
Seita.1G106500	0	0	0	0	0	0.078576	0	0	0	20.3065	5.36255	61.6823	0	0	0	0.011446	0	0	90.5595	140.114	76.3148	0.048671	0.039058	0	0	0	0	0.095949	0.048196	0.096094	0.089419	0.78033	0.310691	0	0.020929	0	0.043805	0.212962	0	0	0.044457	0.097673	0.074393	0.016861	0	116.14	222.228	144.057	0.04069
Seita.1G106600	9.54351	9.40329	10.3542	13.5342	11.5409	12.4869	13.9979	10.5465	16.3793	16.407	11.1436	22.9287	7.7499	8.63488	18.5882	12.8574	13.2366	15.3635	21.3261	22.4365	19.0023	11.9317	13.3024	11.4844	8.95624	11.9158	18.0518	15.5364	13.3463	17.6974	12.1532	17.4093	22.7083	17.4974	17.5166	19.3404	21.3672	20.4265	20.5564	15.4292	14.8263	18.0342	14.9887	13.3133	15.9789	21.387	21.5505	22.3991	12.6107
Seita.1G106700	24.6598	23.3188	27.5015	23.2938	27.3692	23.7273	25.9192	20.9963	21.8474	37.5584	36.2358	34.6843	24.2405	21.1389	23.3111	29.9843	28.0412	31.3081	42.8128	37.635	39.7409	26.0802	27.6178	27.3751	24.0602	26.671	24.2712	32.8983	32.7329	24.1464	46.5456	37.5178	30.6862	30.2924	29.3508	27.3893	36.4943	38.3905	36.5414	34.3531	27.0595	33.2193	19.2832	20.953	21.5031	41.4469	37.3926	41.805	22.2826
Seita.1G106800	14.8882	15.8377	15.4311	14.8713	15.2649	12.6934	18.3898	22.0061	20.9177	9.83666	6.81812	10.1881	16.8307	9.68921	18.2029	22.3221	23.4672	23.2567	8.95382	9.81459	7.22788	18.1498	18.9817	16.2272	7.20809	11.3728	11.1009	4.16291	4.28541	3.21079	20.8604	8.91205	12.2477	9.71458	8.98867	9.91397	3.51021	4.75499	4.3264	9.68307	10.2242	10.2149	15.5188	14.3503	19.2519	11.0746	10.6246	12.575	23.1251
Seita.1G106900	3.7531	3.56983	3.79088	5.09229	6.55738	5.72674	11.3986	11.6404	11.142	1.83316	2.43301	1.41011	2.2203	2.03061	4.00528	14.4089	13.234	12.9494	1.80732	1.75055	1.92679	4.61977	4.59349	2.76503	7.17675	8.04277	7.92584	2.43372	3.27819	2.16479	5.81018	4.96416	5.50342	7.74306	10.204	9.62072	2.08923	2.11646	2.50297	4.5552	4.90287	5.74625	15.0409	14.9602	18.0032	2.00073	1.37808	1.81697	3.22721
Seita.1G107000	35.6703	36.9893	44.5034	45.9683	47.8905	46.9194	49.3796	43.1256	41.2168	50.0128	42.8743	39.0002	50.7718	41.1078	38.4416	55.4999	55.9169	49.4779	42.6845	31.6374	37.9674	71.276	72.5818	43.8386	57.9218	53.9423	39.9358	48.0156	51.2028	23.6231	126.64	48.3232	37.6051	40.2143	39.1749	43.6682	33.3922	32.3524	32.9189	53.6102	40.3362	43.9485	33.7291	35.2757	36.937	29.6203	31.4831	32.6647	43.1679
Seita.1G107100	2.86239	3.64629	3.41482	2.64933	2.17677	1.90505	3.54237	1.53281	2.34027	3.80314	3.26213	4.02271	3.29101	2.81152	4.45137	1.69409	2.17174	1.67224	3.52646	3.61911	2.91127	4.36799	4.45673	3.962	1.62974	1.46007	1.50546	2.7501	4.40015	3.63284	0.957161	2.05508	2.06717	1.31713	0.719998	1.20782	2.11506	2.21034	2.79651	1.46155	3.36734	2.85609	1.52934	1.78409	1.2733	3.72459	3.94031	4.47717	4.18507
Seita.1G107200	83.3974	94.5646	124.671	36.6942	79.5496	31.8237	211.062	140.072	191.475	206.088	200.542	198.27	292.568	246.671	297.507	165.2	190.107	197.04	164.485	181.216	183.744	149.282	183.453	218.076	177.005	165.399	138.919	49.0343	56.7431	81.9859	90.918	115.283	143.503	112.865	102.35	113.993	88.8588	91.5041	90.4272	193.484	224.249	256.342	79.8194	139.918	76.5897	121.016	133.061	143.08	101.175
Seita.1G107300	0	0	0	0	0	0	0	0	0	0	0	0	0	0	0	0	0	0	0	0	0	0	0	0.005155	0	0	0	0	0	0	0	0	0	0	0	0	0	0	0	0	0	0	0	0	0	0	0	0	0
Seita.1G107400	27.4423	36.5491	21.7621	92.0824	130.863	127.654	107.414	100.328	121.422	7.22568	5.80626	10.8618	22.2936	26.2531	40.2909	78.2252	77.3686	95.2167	3.3263	3.70769	5.13772	12.2952	15.1501	26.6396	173.119	177.489	201.833	7.20816	6.08905	7.24303	43.8052	68.7025	186.341	166.573	188.137	170.933	5.81072	5.01758	5.1733	78.3694	112.427	129.55	129.69	122.432	86.7188	5.91488	6.26294	5.38182	28.5016
Seita.1G107500	3.12305	4.2705	4.42016	4.91151	3.90236	4.41266	3.11815	2.48212	3.21458	2.85607	2.8458	2.49009	3.00341	3.40575	4.41474	2.92645	4.51363	3.62869	2.69584	2.23712	2.41636	6.32854	4.93583	4.15644	3.10883	3.28499	2.93673	2.78343	2.83509	1.65044	3.7397	2.27581	2.5585	3.62393	4.03435	3.73289	2.51792	1.97337	2.14872	2.43434	3.11009	2.77734	3.40457	2.46074	2.96338	2.7597	1.88734	2.22353	4.66299
Seita.1G107600	24.1252	24.5556	25.419	28.7114	22.23	25.3344	19.8847	18.066	11.5963	35.7558	47.5876	26.3075	35.1344	31.7874	23.3998	19.2793	17.356	16.5736	31.0885	25.7353	26.9373	31.9873	29.8022	29.7883	25.9296	26.0895	13.9108	31.0795	35.9996	17.8034	19.5266	21.0217	16.0345	26.8277	27.149	27.1998	32.5815	37.7909	35.1797	21.7027	32.9442	29.7573	12.938	13.6381	12.2085	31.6079	30.4623	30.9606	33.984
Seita.1G107700	8.89586	9.07819	9.84705	15.5925	15.279	15.849	18.3619	17.8285	20.6907	3.26091	4.0946	3.1569	7.03222	5.3403	12.0067	20.7033	21.5236	19.5835	2.69077	2.63786	2.62674	7.12748	8.21652	6.06657	18.1978	18.4293	22.6055	5.81861	5.77867	3.75226	7.48733	7.89103	12.9081	23.7486	26.4206	26.8572	4.07929	4.22107	4.8501	6.90138	7.506	8.8342	22.9281	19.5285	27.4992	1.95711	2.09919	2.58774	8.28752
Seita.1G107800	0.126827	0	0.638083	0.145451	0	0.13422	0.227087	0	0.118536	0	0	0	0.140248	0	0	0.482628	0	0	0	0	0	0	0.164125	0.509112	0.322055	0.271399	0	0.172792	0	0	0	0.377033	0	0.140051	0	0	0	0.311212	0	0	0	0	0.250052	0.463972	0	0	0.101743	0	0
Seita.1G107900	9.64798	8.10782	10.0468	10.3533	11.0654	10.2482	7.76081	5.66512	8.13508	8.55147	8.41595	10.501	5.19437	5.20932	11.3369	7.46498	7.29783	7.22132	7.58026	7.85491	8.80706	7.40268	8.9375	7.11137	5.47375	7.87044	11.0375	10.1425	10.0142	9.27873	14.7193	11.3305	15.0039	9.69544	8.80451	9.13204	9.06916	10.3519	10.2304	10.8272	8.77714	11.3339	6.68382	7.21812	8.87811	8.53062	8.47626	8.09775	8.49958
Seita.1G108000	18.1604	16.6537	14.4531	24.3402	23.5556	26.1315	41.1071	33.0218	41.0087	12.0156	10.7636	11.0306	11.8159	8.82622	14.6725	50.0002	50.4738	50.085	11.9798	10.375	10.2929	11.8259	12.751	12.2113	41.8193	44.464	50.1785	10.0938	10.3617	7.45153	16.0377	12.0836	12.1012	54.8285	67.6727	62.0745	10.4542	10.7764	10.76	13.3775	15.7634	16.5536	49.4639	45.5486	56.6688	10.8409	9.95433	7.37828	15.2375
Seita.1G108100	0.235808	0.218513	0.44996	0.308976	0.432332	0.199806	0.274704	0.099438	0.307926	0.207485	0.241505	0.129508	0.179247	0.18202	0.414227	0.251066	0.314118	0.683117	0.060195	0.135327	0.08664	0.103632	0.145466	0	0.487758	0.27984	0.545958	0.143488	0.087962	0.342376	0.211459	0.123615	0.228059	0.412557	0.394337	0.199981	0.052232	0.089463	0	0	0.007445	0.025113	0.309492	0.350124	0.231663	0.176474	0.152303	0.251892	0.40127
Seita.1G108200	34.4191	34.1338	40.7039	44.5044	41.4118	44.2986	57.5485	56.1412	34.5076	59.1578	82.5043	39.5778	55.5323	41.8062	36.8973	63.8943	61.892	57.9386	56.0753	52.0321	45.3086	67.0118	60.2274	52.5469	84.1068	80.9797	38.9096	59.4832	61.186	28.8888	103.331	59.0826	33.0612	57.9133	59.7905	58.0743	54.7796	55.3915	49.6087	57.4117	50.259	52.0623	35.6442	41.8296	39.4616	41.245	37.7696	42.2006	42.6463
Seita.1G108300	1.05679	1.1531	1.25535	2.30376	0.344197	1.95435	1.77121	0.981991	2.54802	1.12745	0.800327	0.955086	0.463918	0.685715	1.94021	1.45565	1.56345	0.990081	0.648105	0.963715	0.525124	2.12125	2.05701	1.33505	0.638534	0.935756	2.43698	1.16504	1.42467	1.37716	1.12687	1.2037	2.18247	2.03671	2.24477	2.40496	1.2456	1.31078	1.35409	1.26153	1.08389	1.5209	1.61743	1.2482	1.83938	0.530833	0.834413	0.951881	0.928131
Seita.1G108400	0.100571	0	0	0	0	0	0.016207	0.059646	0.144736	0.088937	0.209069	0	0	0	0	0	0.196227	0	0	0.116261	0.11068	0.035462	0.055778	0	0	0.167265	0.027347	0.03437	0	0.045743	0	0	0.064889	0	0.059776	0.185752	0.06193	0.014396	0.114233	0.046561	0.126975	0	0.053208	0.024079	0	0.119223	0.309623	0.044681	0.110792
Seita.1G108500	0	0	0	0	0	0	13.1552	10.8582	12.3444	0	0	0.024825	0	0	0	20.1062	18.8288	47.4528	0	0.024013	0.023617	0	0	0	1.50211	1.00555	3.31971	0	0	0	0	0	0.027572	13.3423	9.7346	7.71486	0.048333	0	0	0	0	0.022076	4.79521	5.46192	3.58915	0	0	0	0
Seita.1G108600	0.018604	0.145357	0.119781	0	0	0	12.4943	5.345	11.0776	0.035325	0	0	0.018598	0	0.016018	6.33126	20.4734	19.5793	0.019604	0	0.03514	0.754692	0.605834	0	1.44267	2.94819	4.82861	0	0	0	3.36438	0.158922	1.07229	3.16207	3.04561	8.0415	0.039759	0	0	0.866398	0.038079	5.5226	8.93809	10.8535	7.63169	0.000545	0	0	0.592346
Seita.1G108700	0	0.526382	0.051312	0	0.067668	0.011246	0.03383	0.033822	0.064825	0.017875	0.010922	0.013336	0.064128	0.232779	0.244856	0	0	0	0	0	0	0.394623	0.648321	0.028438	0.184839	0.022504	0.088966	0.014526	0.007371	0.057247	0.086217	0.078976	0.395745	0.008801	0.021652	0.004405	0	0	0	0.052412	0	0.040877	0.06975	0.037687	0.030062	0.010297	0	0.004721	2.34257
Seita.1G108800	0	0.040382	0.020189	0	0.040736	0	0	0	0	0	0	0	0	0	0	0	0	0	0	0	0	0.221538	0.163163	0	0	0	0	0	0	0	0	0	0	0	0	0	0	0	0	0	0.080684	0.038707	0	0	0	0	0	0	0.449323
Seita.1G108900	17.3377	17.0162	8.73515	9.45502	20.8762	21.7295	18.9906	18.0653	6.61049	17.0276	15.0042	14.1832	11.0559	4.42765	14.4484	11.3554	24.6105	23.4116	6.17372	6.73175	11.2845	16.6096	19.0647	6.91484	3.79148	19.8606	5.96577	6.41362	14.5168	9.18158	3.02474	14.7576	14.4494	17.0506	16.0842	16.0072	13.9416	12.8044	13.3147	18.1834	16.5908	15.8936	7.54136	20.7327	19.5114	7.84615	13.7379	6.4701	11.8408
Seita.1G109000	20.1785	18.3138	22.3512	20.599	24.1981	22.5512	19.9592	23.9523	20.1483	6.62578	6.57442	4.7669	11.4744	8.83249	10.1338	29.4598	28.5371	27.8655	6.37343	4.70055	5.58226	13.334	21.1404	24.2739	23.4101	28.8886	25.8102	6.5401	8.19844	4.28229	11.8376	9.39575	12.2673	24.0688	25.9735	26.8426	5.6846	5.63799	6.22622	18.2672	15.2061	20.0825	25.9583	20.7517	22.1031	5.31473	4.83868	4.3892	7.06944
Seita.1G109100	3.9033	3.61013	4.62936	5.69969	6.41962	4.86496	10.125	14.8058	16.2754	9.62304	8.88339	11.7303	4.85698	9.29059	7.16578	13.9586	12.213	9.40379	9.13347	10.347	11.125	8.90105	5.50355	3.60815	10.9906	9.53857	12.9508	9.71262	10.5545	9.29182	8.97805	8.08959	9.80912	8.47916	10.0071	8.86067	8.79355	4.62478	6.35227	4.89589	9.06627	7.29898	8.42923	9.91871	10.2432	6.96827	8.85423	11.0828	8.6188
Seita.1G109200	3.04886	3.18793	4.10978	5.87514	2.80431	4.84633	2.37577	1.54271	1.55849	4.27126	6.19123	3.99727	3.29516	4.1309	3.85415	1.12558	2.03434	2.23572	2.48755	1.64005	1.83359	4.80774	5.03555	2.92592	1.38086	2.4053	2.23909	6.52216	5.31569	3.34895	5.03728	2.69588	2.41934	2.61359	1.4094	1.83447	5.07114	3.92991	3.16676	2.79551	3.93808	3.07164	1.15191	1.18535	1.41736	2.49183	1.9925	2.31221	5.9079
Seita.1G109300	0	0	0	0	0	0	1147.55	1809.19	0	897.468	790.918	0	762.009	1282.56	0	1011.21	0	0	0	0	0	0	0	0	0	0	0	1363.04	0	0	0	0	0	0	0	0	0	0	0	0	0	0	0	0	0	0	0	0	0
Seita.1G109400	4.41125	3.58275	5.06666	7.73354	6.99066	7.05751	5.35984	5.21513	4.94271	4.68407	6.77442	5.08136	3.73746	2.66068	4.5949	6.49871	6.52435	6.10082	5.77644	3.99489	4.05274	7.65822	6.22575	5.3807	5.35826	5.99271	5.77286	7.81912	9.35315	5.59303	8.92675	6.13423	5.0938	5.97276	5.73177	6.69007	7.31829	7.01506	6.60565	5.72271	5.3657	5.62849	5.46943	5.62116	6.02022	4.20833	3.42044	4.18579	2.8928
Seita.1G109500	153.683	195.087	174.815	209.029	166.323	241.678	175.13	190.949	196.988	248.633	270.296	311.866	161.642	194.639	181.793	166.272	148.657	165.615	173.751	200.386	173.664	166.273	186.32	197.876	157.642	149.047	166.429	254.129	238.921	404.419	132.858	123.42	126.972	90.2444	81.8257	85.9221	173.744	176.094	180.59	77.4095	138.139	98.4354	127.125	148.019	132.306	185.51	223.867	213.569	332.504
Seita.1G109600	11.8215	12.3336	11.468	20.311	18.8668	21.9446	27.1487	26.9486	25.9678	11.3613	10.4662	9.12088	10.7246	9.99957	11.6313	38.292	33.7955	33.2601	11.0415	10.9024	10.8942	13.2234	13.9225	10.2048	32.4581	38.6581	34.044	9.26689	11.4511	7.06582	21.4181	14.4028	17.115	37.689	42.0786	40.1235	10.25	10.1203	10.7424	13.0131	16.7391	16.6683	32.2545	31.0023	36.2972	9.65801	9.58247	9.72544	14.542
Seita.1G109700	3.40421	3.6194	7.39241	6.53569	5.44214	6.36627	9.04209	12.0796	9.52002	8.33554	10.2987	7.51802	4.78618	3.99474	6.91095	11.9713	11.4405	9.8815	8.73394	7.9149	7.40565	12.9409	13.3894	6.19125	14.8722	14.5829	9.63067	9.37595	11.1485	7.57528	5.77316	5.91522	5.19417	10.9414	12.8721	11.48	7.46318	7.55412	8.84713	3.99691	5.92661	5.51936	9.22663	6.82021	9.00896	7.60459	7.31976	7.76564	6.19682
Seita.1G109800	49.2329	50.8754	44.8168	37.2744	37.4705	38.0918	16.6116	14.9835	12.7817	40.8196	55.0602	31.3523	68.1079	76.613	45.9495	13.8192	17.0258	15.9838	38.5191	31.3913	32.2606	65.8098	61.8768	50.6822	26.1958	23.7664	16.6101	39.0102	41.2871	18.9315	73.9025	34.7752	23.4045	13.2035	15.9976	17.1096	17.2817	19.4952	20.1817	28.7341	29.2583	25.6715	15.4164	14.5049	13.9817	38.8173	36.3769	34.3855	61.0343
Seita.1G109900	11.1363	8.0031	14.8706	2.283	1.64885	3.39503	14.0346	21.9877	10.9402	28.0932	68.3318	36.1648	3.46143	7.31462	11.3313	13.5899	12.4454	11.1416	16.0657	15.8183	22.4026	9.13557	13.8846	4.15915	15.9635	11.9736	7.42922	10.9649	13.394	5.65615	3.60842	3.76583	3.38871	6.12419	5.08992	4.17715	9.59666	9.29167	13.7932	2.76521	5.11859	5.42222	15.0709	16.3744	13.0595	26.5532	29.5153	36.6142	1.86353
Seita.1G110000	0	0	0	0	0	0	0	0	0	0	0	0	0	0	0	0	0	0	0	0	0	0	0	0	0	0	0	0	0	0	0	0	0	0	0	0	0	0	0	0	0	0	0	0	0	0	0	0	0
Seita.1G110100	0	0.043307	0	0	0	0	0	0	0	0.025305	0.014971	0.038502	0	0.027516	0	0	0	0	0	0.105904	0.059071	0	0	0	0	0	0.023421	0.05134	0	0.075469	0	0.032114	0	0	0	0	0	0.026508	0.012478	0	0	0	0	0	0	0.030427	0.056473	0.047225	0
Seita.1G110200	3.10097	2.9701	4.80602	5.15187	3.92661	5.59532	4.59759	4.14792	3.66782	6.39278	8.70778	4.63217	3.16101	3.24147	2.49762	5.96984	7.00767	4.95242	6.68706	6.05697	5.68793	6.83443	6.24599	4.66354	7.10123	6.71164	5.73761	7.47755	7.44233	4.29948	5.24553	5.64574	3.2051	5.62438	4.30533	5.03832	4.86692	5.49156	6.59734	4.45133	4.48837	3.28492	4.23479	4.02353	2.93645	5.46962	5.53991	5.29479	4.00208
Seita.1G110300	0.446215	0.632918	0.83088	1.52663	1.58291	1.10447	0.89107	0.655922	0.833922	0.832974	1.15049	0.286166	1.16296	0.599547	0.432835	1.18907	1.75351	0.866908	0.588266	0.551072	0.925046	1.02073	1.3262	0.873106	1.0495	1.17008	0.904104	0.663024	1.27145	0.679077	0.520465	0.768801	0.839778	0.910711	0.953672	1.48421	0.951697	0.364262	0.477566	0.608468	1.04245	0.812609	0.82824	1.14148	1.30207	0.555966	0.607162	0.274997	0.989506
Seita.1G110400	0.020376	0.2229	0.030612	0	0	0	0	0	0	0.064069	0.054721	0.083349	0	0.105535	0.185842	0	0	0	0.017958	0.04994	0.084022	0.96281	0.575858	0.018177	0	0.022066	0	0.1389	0.211369	0.054495	2.95934	1.62565	0.122447	0	0	0	0.016899	0.076557	0	0.602205	0.017151	0.014326	0	0	0.01708	0.052435	0.058882	0.036211	1.08
Seita.1G110500	0	0.013333	0	0	0.022719	0	0.580784	0.817807	0.463245	0.185074	0.124304	0.158126	0.016395	0.017738	0	0.811473	1.03231	0.457997	0.09385	0.201411	0.035616	0	0	0.017018	0.500638	0.8416	0.531214	0.236213	0.08337	0.122833	0.239235	0	0	0.540401	0.587202	0.379642	0.141329	0.336505	0.04517	0.007259	0.016785	0.033016	0.475229	0.327673	0.228336	0.706584	0.424982	0.135952	0.014799
Seita.1G110600	3.26875	2.65299	2.95181	4.15283	4.39803	4.94079	6.06301	5.02375	8.6316	0.329957	0.293251	0.276989	0.640184	0.92394	2.36639	8.06255	8.73978	10.7167	0.672284	0.524783	0.324062	2.44739	1.591	2.06544	2.16023	3.53711	6.70234	0.436849	0.557419	0.183778	0.641238	1.41204	2.81715	6.83779	8.60672	8.17403	1.14618	1.12759	1.3363	1.35765	1.36956	2.25754	12.4612	11.8335	12.4422	0.672405	0.498075	0.631442	2.57911
Seita.1G110700	4.75931	4.0821	4.20975	2.70154	2.14888	3.23325	0	0	0	0	0	0	2.14818	2.19835	2.27329	0.037974	3.32994	0.019597	0	0	0	0.824373	1.37919	2.3168	0	0	0	0	0	0	1.66425	0	0	0.066495	0	0	0	0	0.029802	0	0	0.033766	0.031858	0	0	0	0	0	0.263742
Seita.1G110800	8.71143	9.78757	10.902	11.7621	10.902	14.9667	12.4513	12.525	10.2656	4.91876	4.44072	6.49247	3.81555	3.35517	12.0054	10.4545	15.9139	14.0087	5.46509	6.74299	5.99791	9.71194	10.5739	8.00107	9.14922	13.0294	5.93394	7.43912	7.95592	3.82924	7.41024	5.17011	5.78684	9.48882	11.2375	13.2012	7.21198	6.67804	7.57971	4.11963	7.22068	8.18272	10.8002	9.72563	12.148	7.21079	7.89237	5.85372	13.4808
Seita.1G110900	0	0	0	0	0	0	4.83732	3.67682	9.09561	3.87961	2.70296	7.90418	1.55065	1.71939	4.74365	4.40662	4.18072	3.55904	3.8128	4.753	3.22357	6.85863	6.98516	5.60062	4.65611	4.40793	9.73206	4.46102	3.97106	10.9317	2.15099	3.13362	5.62253	5.8182	6.56043	5.3373	6.37375	5.90076	6.19071	4.80527	6.17692	5.6601	3.67253	3.93338	3.05299	4.17779	4.08147	3.51734	7.00226
Seita.1G111000	0.581284	0.626223	0.753595	0.871815	3.99424	3.30669	2.5392	1.80802	5.09394	1.968	2.25326	4.26467	3.33812	2.94522	4.31801	0.000324	0.022353	0.000205	0.110247	0.03871	0.05272	0.37445	0.402757	0.916688	2.29514	2.87947	4.47005	3.06455	4.51039	0.418613	1.91114	3.80495	2.03382	0.000482	0.005447	0.116189	0.246636	0.114802	0.139318	0.000959	1.58604	0.812474	0.322379	0.469557	0.392743	0.579684	0.099838	0.353516	6.33489
Seita.1G111100	5.54488	7.10539	3.32705	1.41624	1.46876	0.469447	1.90356	1.41736	3.21426	10.104	5.04146	12.0958	0.501275	1.04363	1.98021	2.21718	1.60257	1.54284	3.58531	4.66733	3.83515	1.70685	1.40378	2.23684	2.19073	1.27877	3.69957	9.75577	8.14155	32.4768	0.279299	0.583869	2.15194	1.8072	1.25816	1.35882	3.35276	3.4993	3.45202	0.994994	2.3699	1.49903	0.452586	0.470322	0.426479	2.98669	2.78854	3.81666	2.23769
Seita.1G111200	9.55418	9.92586	5.42268	3.56729	4.39661	2.50986	2.88936	2.71611	3.76657	6.53967	3.7505	8.49891	7.34902	11.9065	8.56497	1.41394	2.87624	1.83047	5.16036	5.74108	5.71076	4.49852	3.58322	8.11042	3.19842	2.96631	3.98782	4.87742	3.04419	9.6234	1.41749	2.12563	1.71093	1.59175	3.69874	1.94413	6.66246	5.81404	7.39995	1.43605	4.73484	2.30141	1.67615	2.11368	1.00875	5.61397	5.51025	6.6802	5.14533
Seita.1G111300	0.607886	0.706484	0.874211	0.498737	0.540709	0.95015	0.225817	0.744315	0.612094	1.34893	0.943119	0.332658	0.06538	0.410286	0.356297	0.135336	0.454633	0.422177	0.559031	0.47513	0.425721	0.335226	0.612148	0.528242	0.954131	0.608743	0.060737	1.26611	2.20302	0.445187	0.181873	0.348297	0.45528	0	0.421595	0.06136	0.667195	0.6706	0.786879	0.184764	0.330462	0.267349	0.104899	0.5011	0.326617	0.126719	0.411636	0.178444	0.444221
Seita.1G111400	9.63973	7.82744	8.50674	10.9865	8.03492	7.38408	4.73798	5.17403	2.96612	7.44018	6.78022	5.12588	7.65058	9.57145	7.26687	5.77021	5.66035	4.31931	6.30275	5.10163	5.93206	8.81013	10.7855	5.37274	5.36907	5.47386	4.6875	5.8655	4.88559	3.95091	6.70944	4.7149	6.07574	6.66509	4.93964	6.64192	6.79307	8.09902	7.80542	9.0701	7.82988	6.77154	4.71193	4.4952	4.17455	5.51596	5.72451	5.08476	7.96524
Seita.1G111500	26.3995	19.7406	39.7068	13.7278	20.6451	19.9419	21.9219	35.2568	37.2061	10.9991	14.5889	18.4114	18.2484	20.5596	43.7923	20.182	20.2607	25.4165	10.6678	11.3728	10.578	26.6981	26.9164	20.5893	5.98581	5.55136	13.1198	11.4711	14.341	25.9846	2.24595	5.75938	14.9213	13.8432	13.9039	10.5259	14.3796	18.5714	14.5138	8.30113	13.9482	13.1682	28.7688	24.7668	24.1718	12.6524	13.6828	11.4114	8.52221
Seita.1G111600	33.7161	30.4542	28.0282	30.3834	26.7619	29.0132	4.55772	3.59669	3.83791	7.09427	7.2679	7.72133	21.3178	25.6035	23.4886	5.79161	6.76195	6.41702	10.6165	10.2033	9.64318	20.6915	20.3219	25.8431	4.0716	5.435	5.59763	4.71643	5.19998	3.19431	18.6271	11.0078	8.63451	7.04036	6.59694	5.41197	3.01239	4.59229	3.42804	12.5235	31.4363	23.1818	6.4763	6.41942	7.73109	11.1589	11.2991	10.5488	30.2828
Seita.1G111700	0	0.091012	0	0.118291	0	0.321627	0	0.15973	0.04141	0.370555	0	0	0.251305	0.98296	0.265308	0	0	0	0	0	0	0	0	0	0	0	0	0.074183	0.122655	0.029657	0.317021	0.148243	0	0	0	0	0	0	0	0	0	0	0.011105	0.060025	0.049632	0	0	0	0.112186
Seita.1G111800	0	0	0	0	0	0	0	0	0	0	0	0	0	0	0	0	0	0	0	0	0	0.037239	0.021943	0	0	0	0.02162	0	0	0	0	0	0	0	0	0	0	0	0	0	0	0	0.042064	0	0	0	0	0	0.022969
Seita.1G111900	0.063753	0	0.134506	0.232017	0.003911	0.301685	0	0	0	0	0	0.04007	0.204675	0.06466	0	0	0	0	0	0	0	0.097628	0.09246	0.097839	0	0.121609	0.198824	0	0.040509	0	0.190707	0.413906	0.188709	0.114453	0.086629	0	0.06039	0	0	0.254837	0.161927	0	0	0	0	0	0.12987	0	0.253481
Seita.1G112000	3.12735	3.90716	4.40438	8.54654	7.37555	6.18711	1.81562	1.90413	2.03427	3.81798	1.5906	2.50443	0.791816	2.21931	3.61597	1.49991	2.85711	2.26826	1.9259	2.86389	2.39816	10.6094	4.67322	4.30687	1.96018	3.47576	3.97713	6.66559	8.2252	2.38867	5.99391	3.89196	7.04541	3.47261	4.18588	2.44359	3.9741	6.90175	5.49884	5.52927	5.93575	3.83697	2.01117	1.10386	2.73061	2.60916	2.78481	2.70614	6.72888
Seita.1G112100	13.7159	14.2343	15.686	10.8012	13.8753	12.0523	17.244	10.0516	13.9127	35.5585	22.5796	34.5932	31.2811	22.3396	13.6879	25.2138	24.9259	25.4529	39.0198	37.3195	35.2556	18.911	19.44	41.4216	11.7936	10.6115	14.0338	18.1647	17.2451	23.6735	4.6905	8.70029	8.77964	13.779	14.2308	15.1292	24.2957	26.9169	25.2307	10.0926	10.5126	11.1933	7.81108	9.48124	7.07819	23.5434	23.5957	23.7315	7.33138
Seita.1G112200	0	0.0697	0	0	0	0	0	0	0	0	0	0	0	0	0	0	0	0	0	0	0	0	0	0.090884	0	0	0	0	0	0	0	0	0	0.112505	0	0	0	0	0	0	0	0	0	0	0	0.032909	0	0	0
Seita.1G112300	5.76119	4.94007	6.16695	6.08016	6.67293	6.12157	4.54166	5.05142	3.60226	7.05587	6.69047	5.54439	8.53151	7.5054	6.70043	4.88112	5.78951	5.88555	5.75029	5.2976	5.71312	7.05124	8.76206	8.65624	7.30645	8.15404	4.97117	6.687	8.07408	5.28524	11.2241	6.51315	5.76042	5.90634	6.11253	8.46045	7.00582	7.19966	7.47174	9.13531	8.35972	7.01419	3.37409	3.33426	3.50197	4.36572	4.13526	4.63894	7.18632
Seita.1G112400	0.18246	0.181811	0.37786	0.437001	0.552541	0.561709	0	0.067057	0	0	0	0	0	0	0.290331	0	0	0	0	0	0	0.147626	0.24639	0	0	0	0	0	0	0	0.346869	0.174803	0	0.154812	0	0	0	0	0	0	0	0.321256	0.068405	0	0	0.138299	0	0	0
Seita.1G112500	19.9914	21.0584	19.2566	21.4006	25.9359	28.8576	22.5708	21.6759	26.3137	29.9231	22.695	30.6095	37.7581	28.3298	36.0945	23.127	23.1608	23.424	24.0439	23.3865	23.3304	30.9903	34.1044	22.654	36.4865	31.0498	37.1038	34.9782	36.1177	29.2146	68.5993	39.3117	47.2643	27.7999	27.72	31.4334	28.3817	30.7981	28.7137	31.5714	26.5584	29.0624	19.3675	17.7948	20.5039	21.0774	21.4082	22.2861	26.095
Seita.1G112600	3.7666	3.23904	4.65507	7.18449	4.9494	3.85589	2.62173	3.67108	2.38389	3.3905	4.09815	1.95027	3.09627	1.33926	3.42917	1.9119	3.09371	2.56775	3.36962	3.12672	3.4756	1.50906	4.56066	2.00626	6.95989	5.56934	5.12014	2.3826	4.99452	2.75979	3.27316	3.15562	2.88801	5.13703	5.79204	5.88889	4.53189	4.57755	3.518	3.3232	1.83066	2.55468	2.71471	3.54143	3.0086	2.05992	2.11439	2.67788	3.37844
Seita.1G112700	0.584967	0.693855	1.68814	1.50261	1.33631	1.97022	0.757745	0.7945	0.693951	1.68451	1.82259	1.27128	1.72033	1.36036	1.30424	1.20789	1.18702	1.59371	1.19551	1.32368	1.6634	1.71034	1.55068	1.50653	2.96919	1.64293	1.58279	2.70642	1.89754	1.45268	1.65182	1.87007	1.47523	1.56859	1.87932	1.85406	1.55099	2.01635	1.54187	2.12855	1.71298	1.27442	0.798541	0.386798	0.785665	0.976851	0.649482	0.977273	0.846668
Seita.1G112800	6.68131	12.2902	1.62955	0.775577	1.52598	0.277897	0.00802	0.040747	0.023782	1.70175	1.52228	1.65097	1.99809	3.67882	3.867	0	0.014612	0.088973	1.34301	1.79747	1.94932	4.52235	3.38449	0.988847	0	0.050545	0.064385	0.399378	0.842991	0.142431	0.28199	0.422946	0.437624	0.019895	0.001939	0.072994	0.159497	0.632343	0.121309	0.363107	0.539282	0.350781	0	0.00498	0.054429	2.8728	2.97401	1.40961	34.4992
Seita.1G112900	6.49702	6.6163	5.7291	5.05694	7.5361	6.39044	8.40799	6.27198	5.55968	0.386217	0.654302	0.612961	6.01316	3.49779	5.27053	11.4139	15.0592	15.4077	0.417384	0.226484	0.349238	2.92303	4.08995	3.60163	11.6787	10.3602	8.2879	0.168576	0.334995	0.099828	4.48448	2.63731	3.53987	8.23616	10.0373	7.81956	0.316826	0.406662	0.216087	2.8754	4.33348	4.99468	19.9714	20.7834	17.9956	0.540839	0.610173	0.570375	3.20184
Seita.1G113000	4.01985	4.85548	4.6809	2.92522	3.24098	2.68547	2.09044	3.55745	2.15253	2.09018	1.36512	2.02026	2.40966	2.40219	4.26857	1.85995	2.5661	2.24037	1.89128	2.50304	2.3051	6.42506	6.64718	2.73821	1.08133	1.92548	1.48263	1.6445	1.84117	1.14657	2.71638	1.17597	2.25011	0.825209	0.88339	0.753006	1.61187	1.74714	1.81816	1.01157	1.69049	2.41493	2.7132	3.41862	3.25977	2.83628	2.20629	2.57466	7.15994
Seita.1G113100	26.5761	27.6977	27.7729	42.7917	32.0997	39.4547	29.3287	24.081	23.9901	28.5145	26.7437	32.4928	21.9654	19.3795	23.8339	39.5744	39.9062	34.847	38.0611	39.8687	35.2898	29.604	27.0068	25.7403	32.8549	35.0465	27.6349	28.1643	26.249	20.0202	46.528	37.8708	26.7337	40.7006	37.6869	39.1401	34.6625	34.6563	36.3327	39.421	29.3405	33.0778	28.7622	27.9456	32.6352	39.4542	38.2446	37.1574	34.8559
Seita.1G113200	14.6564	14.9595	12.5509	7.91113	6.33577	8.49912	0.208082	0.092964	0.231812	1.0453	3.18023	4.2488	1.26448	2.12959	0.092221	0.182019	0.079679	0.292422	0.7622	13.6235	0.671586	0.294328	0.144216	0.065516	0.082691	0.695247	0.036337	8.48902	0.251816	3.52429	0.366074	0.879967	1.08756	1.52716	0.200263	0.24892	0.641805	6.13775	6.43889	0.58173	1.05219	0.405029	0.440724	0.390749	0.000187	22.5927	0.088965	0.000473	6e-06
Seita.1G113300	2.55428	2.82759	3.56545	3.43087	3.72193	3.62724	5.90177	4.57271	5.64971	7.44102	7.08183	4.86235	4.37885	3.86013	5.2561	8.73017	7.50193	9.38671	7.64229	3.79195	6.74885	4.17975	3.98594	3.26882	4.22722	5.4335	4.83646	1.30873	3.30674	1.44086	3.53878	2.34822	2.1503	7.62031	7.56132	7.84402	5.34899	4.05053	2.87868	3.20552	4.19598	3.75332	7.02838	7.23762	6.14381	0.759368	11.3136	8.26117	9.54058
Seita.1G113400	0.69034	0.337839	0.683645	1.01131	0.83644	1.39379	0	0	0	0	0	0	0	0	0	3.96441	6.73722	5.111	3.68924	2.65393	2.139	2.39902	1.38071	0.556152	0.098785	0	0	0	0	0	0	0	0.040109	3.20386	4.10537	4.8171	1.56748	2.2996	1.33176	0.813075	1.94308	1.04325	2.09094	3.13753	2.2184	1.93804	2.21044	2.63179	0.550004
Seita.1G113600	0	0	0	0	0	0	0.348031	0.522872	0.219197	0.362347	0.482908	0.061969	1.14756	0.803549	0.73778	0	0	0	0	0	0	0	0	0	0.734423	0.707136	0.276093	1.07654	1.17139	0.30494	8.02902	3.96297	1.25015	0	0	0	0	0	0	0	0	0	0	0	0	0	0	0	0
Seita.1G113700	0	0	0	0	0	0	0	0	0	0	0	0	2.25886	1.74166	0.751401	13.1373	16.9138	11.2288	14.8047	9.65383	9.60288	32.2331	28.9746	28.6146	0.318082	0	0	0.045773	0	0	0.255096	0	0.1782	13.1716	13.4055	14.8148	11.393	12.1901	11.0281	20.061	22.3047	18.8832	0	0	0	0	0	0	0
Seita.1G113800	0	0	0	0.007603	0	0	0	0	0	0	0	0	0	0	0	0	0	0.119302	0	0	0	0	0	0	0	0	0	0	0	0	0	0	0	0.101883	0.10419	0	0	0	0	0	0	0	0	0	0	0.044703	0.081935	0	0
Seita.1G113900	6.03252	6.04585	4.7554	8.06888	5.48435	6.14545	10.3163	9.74816	9.85117	0.06495	0.027347	0.115087	5.08677	4.49943	7.66791	11.8594	11.6392	10.4717	0.740665	0.371946	0.367551	3.3775	4.91509	4.41526	6.68659	7.33141	6.55062	0	0	0.07309	1.34151	1.89359	3.79349	6.73982	9.65262	8.89621	0.341978	0.316821	0.346197	1.58086	5.29405	5.12338	12.8228	13.8705	13.5853	0.113775	0.107579	0.226335	5.60923
Seita.1G114100	0.373564	1.69828	0.974629	0	0.147608	0	0.414375	0.282827	0.261415	0	0.014064	0.016736	3.5919	1.04399	3.01909	0	0.035766	0	0.017512	0	0.028692	0.018809	0.235399	0.44658	0.032133	0.182698	0.083221	0	0.035477	0.024262	0.013433	0.487008	1.18763	0	0	0	0	0.032505	0	0.493023	0.776155	0.827361	0.11084	0.157905	0.166557	0	0	0.102057	0.749035
Seita.1G114200	12.0187	10.5912	5.55711	9.09227	7.01228	13.2798	0.451162	0.22919	0.427672	0.343793	0.373929	0.626212	6.63053	4.40813	8.23066	1.15668	1.50375	1.10482	3.11842	2.99828	3.7168	4.56301	5.20728	12.4467	0.525679	0.417337	0.554766	0.716055	0.603141	0.644148	0.356146	1.34464	2.14533	1.88854	1.68589	1.21937	2.86694	2.95864	3.84174	1.53545	12.6777	9.31224	0.124759	0.122936	0.1617	0.470063	0.312943	0.443769	11.8702
Seita.1G114300	4.32693	4.41079	4.13266	8.60854	3.60052	3.75527	0.09491	0.037527	0.196006	0.086805	0.295883	0.149796	0.15339	1.24793	0.272726	1.61806	0.532486	1.05212	0.946914	0.710314	2.35408	2.00741	0.486119	1.63904	0.10087	0.14384	0.235831	0.266439	0.187481	0.153249	0.070108	0.246242	0.159044	1.49763	0.716543	1.53652	0.900929	0.734752	0.9612	1.11018	1.15582	1.55075	1.39623	1.56576	1.41621	2.86761	3.48374	3.83755	1.28675
Seita.1G114400	0.460888	0.492161	0.213447	0.879203	1.16837	0.943836	0.808823	0.715045	0.875717	0.259444	0.206516	1.28978	0.240176	0.446298	0.942947	0.674734	0.90401	0.424186	0.157536	0.601225	0.393065	0.793206	0.49368	0.284292	1.56461	1.09089	2.59408	0.78811	1.00872	1.80135	0.539769	0.775947	1.17546	1.86509	1.14119	2.26851	1.46576	0.915814	1.51738	0.347158	0.926945	0.716257	1.2648	0	1.22477	0.498197	0.497986	0.268504	0.519126
Seita.1G114500	18.7216	16.1559	17.6086	18.2115	21.1612	19.7494	1.13622	0.340969	0.251815	1.82252	0.754212	0.922404	1.71194	0.905634	1.3966	7.09598	6.10719	3.38509	4.41511	7.49439	5.84606	6.6346	5.25241	4.63655	0.326325	2.3603	1.22107	1.57255	0.479972	0.74654	0.547593	0.414962	0.338008	3.42401	4.20171	5.51004	7.67734	6.8653	7.23941	2.35564	7.63825	3.46246	4.23726	4.5118	5.5784	13.569	11.1128	14.7167	2.79322
Seita.1G114600	0	0	0	0	0	0	0	0	0	0	0	0	0	0	0	0	0	0	0	0	0	0	0	0	0	0	0	0	0	0	0	0	0	0	0	0	0	0	0	0	0	0	0	0	0	0.010531	0	0	0
Seita.1G114700	0.196314	1.55492	0.04948	0.008226	0.084328	0.007591	0	0	0	1.49058	1.25038	1.23499	0.053076	0.127255	0.084209	0	0	0	0.425855	0.742226	0.708432	0.050044	0.063544	0	0	0	0	0.744609	0.875419	0.790255	0.013054	0.106583	0.01398	0	0	0	0.413738	0.961576	0.561772	0	0	0.024133	0.00759	0	0	2.21102	2.31561	0.85404	1.52837
Seita.1G114900	0	0	0	0	0	0	0	0	0.004888	0.331164	0.58303	0.689735	0	0	0	0	0	0	0.282746	0.331068	0.618096	0	0	0	0	0	0	0.046253	0.252041	0.234505	0	0	0	0	0	0	0.23843	0.245778	0.323279	0	0	0	0	0	0	1.18891	0.876565	0.422912	0
Seita.1G115000	0.232014	0.362772	0	0.237995	0.638641	0.15984	4.12203	9.83131	3.43216	2.29467	0.878809	0	4.43692	0	0.409344	2.39183	0	1.19077	1.04502	0.642933	0	1.0192	0.405993	0.039948	4.09269	2.79378	4.15926	2.7115	0	0	0	0	4.91407	0.320461	1.67571	1.12548	0.00596	1.2563	0.383113	0.599594	0.852558	0.376612	0.153963	0.282905	0.359597	0	0.080158	0	0
Seita.1G115100	5.89245	4.59365	6.26834	6.04793	7.41747	4.75489	9.44896	6.81617	6.31984	5.36579	4.43691	5.35764	2.46585	3.83086	4.26124	18.967	19.2114	20.1052	9.37086	9.16189	8.38234	16.5044	15.0078	7.71257	18.65	11.4824	11.1705	5.66428	6.6797	3.76109	7.62529	8.54306	6.72878	15.4445	16.8352	15.8319	11.3151	14.6391	9.58769	18.9557	12.5446	14.3243	9.59441	11.059	10.4688	5.36736	4.38797	6.04026	7.07565
Seita.1G115200	0	0	0	0	0	0	0	0	0.038313	0	0	0	0	0	0	0	0	0	0	0	0	0	0	0	0	0	0	0	0	0	0.041463	0.038489	0.0354	0	0	0	0	0.045938	0	0.009648	0	0	0.074471	0	0	0.02059	0	0	0
Seita.1G115400	0	0	0	0	0	0	0	0	0.005904	3.25622	4.29881	1.89291	0	0	0	0	0	0	4.25447	2.01466	2.90328	0	0	0	0	0	0	0.576179	1.92742	1.85262	0	0	0	0.045431	0.034763	0.030976	3.54084	4.00462	5.82999	0	0	0	0	0	0	1.09315	1.88271	1.00412	0
Seita.1G115500	9.17633	8.08073	10.0812	16.2757	15.9688	26.4952	11.6871	10.4478	9.882	8.10789	5.31668	7.17053	4.13147	5.8665	8.23539	26.3893	25.8434	25.4278	14.0165	13.1418	13.1514	20.0647	18.2651	15.1298	18.4656	21.5712	14.8796	10.185	9.26148	8.06353	13.2435	15.0167	10.8504	27.8941	28.1311	27.0781	17.1593	18.1288	16.373	25.3007	18.8405	22.5622	20.948	24.1349	27.1759	13.0439	11.1185	13.05	11.2685
Seita.1G115600	0	0	0	0	0	0	0	0	0	0.710278	0.521656	0.782238	0	0	0	0	0	0	0.053999	0.304096	0.145535	0	0	0	0	0	0	1.01232	0.492229	0.206932	0	0	0	0	0	0	0.232742	0.615079	0.095492	0	0	0	0	0	0.026293	0.177514	0.572109	0.111485	0
Seita.1G115700	0	0.023543	0.010445	0.013156	0.012271	0	0.154006	0.027213	0.067964	2.78782	4.66728	2.86494	0	0	0	0.014219	0.061531	0	3.62402	3.53419	3.05243	0	0	0	1.29769	0.398103	0.9309	5.06657	7.65953	8.40471	0.014565	0	0.015109	0.038002	0	0.049436	6.92735	5.87862	9.81109	0	0	0	0.024276	0	0	6.54277	3.51885	5.63007	0
Seita.1G115800	0	0.027853	0.037323	0.015564	0.014518	0	0.094721	0.064391	0.249779	5.4724	9.30423	5.13551	0	0	0	0.070585	0.180534	0.032507	6.24451	7.65934	5.26394	0	0	0	2.49939	1.28283	2.00678	0.575795	18.126	14.7376	0.017232	0	0.017875	0.014987	0	0.211501	11.6652	10.3659	18.3432	0	0	0	0.02872	0.025994	0	8.40692	6.99011	10.2961	0
Seita.1G115900	1.11279	0.260971	1.11914	2.41221	1.61425	0.750908	2.79401	0.698298	1.94934	2.36739	1.84596	0.874598	3.57647	3.83301	1.94694	1.61864	1.0928	1.21813	0.94172	0.523428	1.19829	0.473624	1.65356	2.94604	7.91247	2.95371	3.69064	4.43483	5.86163	1.87628	7.21807	7.23444	2.2526	2.51505	1.26434	1.05014	1.62379	0.73954	1.4785	2.48434	0.313984	0.819389	0.52034	0.149358	2.04751	0.461561	1.44368	0.78652	0.251658
Seita.1G116000	0	0	0	0	0	0	0	0	0.033209	1.57567	0.144173	2.0577	0	0	0	0	0	0.007547	2.22714	1.6974	2.00951	0	0	0	0.136584	0	0.045536	2.66711	4.72302	6.50767	0	0	0	0	0	0	3.4822	3.04596	5.12364	0	0	0	0	0	0	3.49796	2.28614	3.46495	0
Seita.1G116100	0	0	0	0	0	0	0.48422	0	0.540317	10.271	10.3219	8.85394	0	0	0	0.108918	0.19261	0.140466	10.6428	12.7126	8.59711	0	0	0	4.76582	1.81084	2.72204	3.30036	32.7347	28.9747	0	0	0	0	0	0.05536	16.9877	12.9038	24.3359	0	0	0	0.050745	0.022964	0	9.09922	7.64688	10.2628	0
Seita.1G116200	7.14784	4.27209	8.55504	12.776	9.52448	14.0699	0.113603	0.01998	0.009085	0.039196	0.111731	0	0.242955	0.957064	1.14644	0	0	0.005251	0	0.060674	0	1.04847	1.56698	6.13425	0.352728	0.280929	0.103881	0.012023	0.058384	0.039788	0.136958	1.10977	0.137125	0	0	0.022555	0	0	0	2.33927	4.11181	3.26338	0	0	0.049603	0.078314	0.12719	0.071809	1.83153
Seita.1G116300	0.33292	0.195221	0	0.054544	0.151783	0.35216	0	0.056413	0	0.028226	0	0.263817	1.48297	1.2066	1.93813	0	0	0	0	0	0	0	0.052754	0.376531	0	0	0	0.130028	0	0	0	1.05428	2.04814	0	0	0	0	0	0	0.0547	0.08987	0.053338	0	0	0	0	0	0	0
Seita.1G116400	192.621	186.585	149.897	183.194	159.099	180.488	3.85075	3.23252	3.66328	27.4585	29.8166	51.088	69.3253	149.768	135.269	1.1294	1.96787	3.41731	23.1857	30.85	20.5241	36.1438	37.6754	126.869	5.90967	7.55261	6.1062	11.3353	10.9783	7.91564	12.034	21.7424	40.9658	1.78232	1.32228	3.38549	11.8783	10.6837	11.8632	25.4514	58.1303	44.752	0.64338	1.08191	1.10844	25.085	26.2665	29.06	54.1143
Seita.1G116500	43.259	23.5327	25.8225	1.36309	0.098388	1.28902	0	0	0	0.7309	0.294458	0.738889	35.5986	12.1879	20.5573	0	0	0	0.850981	0.587708	0.786249	1.59959	1.84214	2.5442	0	0	0	0.123838	0.173271	0.085113	0	0.023205	0.041124	0	0	0	0.073023	0.153233	0.036066	0	1.65829	0.333008	0.033037	0	0	1.80429	1.19065	0.470525	18.7182
Seita.1G116600	0.807752	0.665864	0.755061	0.206464	0.206723	0.184534	0.332498	0.226936	0.672637	0.682874	1.27539	1.20878	1.7517	2.01676	1.31837	0.106447	0.122307	0.113888	0.269505	0.100466	0.520901	0.83291	0.451517	0.527156	0.236778	0.155374	0.406488	0.885724	2.27278	1.50661	1.10912	0.312659	0.300545	0.09726	0.048728	0.086421	0.0999	0.191641	0.14836	0.013606	0.110605	0.135701	2.20713	2.3278	3.36445	3.53366	2.43868	2.69614	0.460123
Seita.1G116700	26.9318	40.9614	2.02897	2.46217	12.4128	2.46418	7.57852	5.15892	6.91037	52.8302	27.69	101.388	8.47024	25.5674	18.7636	5.40933	5.50882	8.78192	43.0131	62.9204	54.8984	0.953648	0.850575	1.69484	5.30403	5.84437	12.8528	6.4649	3.83422	9.18097	1.96637	0.976259	1.56457	4.98825	4.23317	4.04147	7.72011	9.46555	7.83049	5.98376	2.74055	1.52467	4.28196	3.7074	3.4022	67.5886	63.8551	68.7466	15.9721
Seita.1G116800	17.3187	15.0201	16.801	20.8809	18.5534	20.1825	16.6865	15.4199	13.0195	21.8863	26.7577	16.1278	20.1749	18.7933	15.9754	13.966	16.2067	11.5418	18.0983	17.6585	15.3811	21.8619	23.1054	23.1665	19.0921	18.6064	15.2796	29.9119	31.2863	16.2388	20.1098	17.3633	12.2785	16.0406	16.1865	16.4344	21.0428	21.8637	21.8122	17.0628	20.9944	19.4553	10.2051	6.79029	7.29135	10.689	9.61025	12.3881	11.2811
Seita.1G116900	8.25103	10.8163	11.1809	22.3066	16.9774	20.0542	11.687	8.87163	12.2716	12.0879	12.2744	12.9278	7.6302	5.82667	11.6321	10.2247	12.5512	12.0629	13.1827	12.6543	13.1592	20.1425	19.159	11.5964	15.6731	18.3969	16.059	14.1981	13.0857	14.1164	61.9382	32.0435	25.6121	16.4845	17.9451	19.6752	19.4689	19.5393	19.5006	33.1728	19.5034	25.3938	11.1278	9.38009	11.1399	12.5376	10.9992	11.4628	14.6245
Seita.1G117000	1.25179	0.616229	0.9586	0	0	0	0.074437	0.06169	0.016203	0.868211	0.647423	0.650912	2.40257	2.19601	1.54734	0	0	0	1.05927	0.737119	2.16931	0.2908	0.773415	0.58621	0.071738	0.200774	0.111243	0.333281	0.483054	0.326411	0.110061	0.231749	0.296842	0.065133	0.020608	0.053366	0.320841	0.672489	0.389857	0.221544	0.262818	0.17317	0.010626	0.031563	0.04144	2.78777	2.3455	1.13141	0.811851
Seita.1G117100	33.9506	52.3229	51.6493	88.7852	66.9946	95.1825	69.925	62.6652	51.0485	62.8407	58.4492	51.3323	28.2921	23.6096	37.2907	84.6648	81.3727	86.5433	72.6128	74.3707	75.2029	105.009	94.3805	46.1757	81.6723	83.1275	63.0083	67.3507	57.9962	45.4783	120.281	78.2244	63.8077	98.025	98.7589	92.5833	67.8534	70.369	73.2832	82.9772	55.424	60.4602	62.2531	68.9385	66.9983	66.4296	69.9197	60.8922	106.529
Seita.1G117200	0.210516	0.279701	0.14011	0.329334	0.257697	0.084753	7.36839	8.61914	9.56696	0	0.029458	0	0.370832	0.347958	0.231744	3.43601	1.76245	3.59202	0	0	0	0.045423	0.08895	0.304383	9.13896	8.71622	8.77388	0.044024	0.044381	0.118064	1.59082	2.28996	1.7049	6.87893	9.20776	7.2714	0	0.057031	0	2.2138	0.843845	0.877072	6.59795	8.4914	5.19244	0.062417	0	0	0.659577
Seita.1G117300	4.59734	5.51003	5.55455	9.48509	11.6679	11.6132	12.803	13.9934	14.315	1.64756	1.67382	1.63694	5.0674	3.3254	4.1646	22.3741	22.9052	21.0836	2.60289	1.9435	2.12683	5.38502	5.65551	4.46144	27.4788	28.4723	28.5874	3.45295	4.19559	1.83187	11.2887	6.951	9.57288	31.8467	35.6828	33.5169	3.6333	4.13474	3.36625	8.32276	8.06088	10.3839	25.9496	22.5801	28.4175	1.32819	1.36223	1.28899	4.75054
Seita.1G117400	0.232058	0.21498	0.153995	0	0.478758	0.147969	0	0	0	0	0.206269	0	0.008972	0.017793	0.016546	0.144561	0.019999	0.181422	0.117418	0	0	0.042271	0.050753	0.007876	0.006068	0	0	0	0	0	0	0	0	0	0.027796	0.006427	0.163267	0.076935	0.028791	0	0.053018	0.152161	0.034328	0.040611	0.07039	0.010926	0.001938	0.064494	0.2862
Seita.1G117500	991.749	823.447	810.336	512.039	746.391	822.203	111.054	38.9235	120.801	646.816	505.644	610.167	228.212	175.534	531.975	311.561	261.615	363.169	299.788	287.985	321.249	157.319	161.743	341.525	121.076	114.5	172.776	527.724	515.337	408.38	31.7402	166.588	498.759	240.013	195.649	268.381	692.896	815.426	671.086	287.373	543.094	504.393	56.591	95.8211	175.505	614.472	661.357	818.477	455.369
Seita.1G117600	60.1861	88.0563	66.4054	107.852	51.267	108.757	194.129	215.229	179.055	239.36	197.527	224.087	73.2842	83.4164	81.5473	195.378	193.565	173.444	180.117	168.479	174.576	106.313	78.5778	62.3836	111.286	83.564	100.533	131.553	117.14	94.47	60.8034	53.2159	61.6762	134.101	143.543	132.398	146.104	130.964	156.363	57.9406	49.0432	53.7798	142.918	144.321	174.249	224.003	218.514	242.677	152.808
Seita.1G117700	0	0	0	0	0	0	0	0	0	0	0	0	0	0	0	0	0	0	0	0	0	0.051627	0	0	0	0	0	0	0	0.029518	0	0	0	0	0	0	0	0	0	0	0	0	0	0	0	0	0	0	0
Seita.1G117800	11.3219	12.4056	15.0139	18.6256	17.1874	14.8947	10.9671	12.9745	14.2069	14.6554	12.3012	9.46126	14.6577	9.32331	11.9493	12.8681	12.8114	12.7635	11.1071	9.52356	8.23594	20.1747	20.9511	10.7055	26.0942	12.6971	18.6962	18.3594	21.5345	9.16697	41.1968	19.884	14.4876	17.3214	19.8703	21.0441	14.226	15.8862	15.806	25.4284	18.3826	20.6064	12.8564	11.7167	12.661	9.30901	9.05312	9.52974	16.1957
Seita.1G117900	0.269438	0.341303	0.41685	0.959796	0.696342	0.582552	0.122443	0.397172	0.716333	0.261012	0.578419	0.751364	0.224181	0.058349	0.60675	0.670949	0.786998	0.680487	0.218368	0.604372	0.52369	0.550512	0.968635	0.189986	0.215203	0.276882	1.52863	1.01468	0.99278	0.833747	0.728703	0.317338	0.835677	0.89182	0.780562	0.845102	0.515094	0.806781	0.719465	0.615158	0.226261	0.632332	0.625962	0.523253	0.371017	0.520075	0.380807	0.357636	0.816075
Seita.1G118000	0	0	0	0	0	0	0	0.007293	0	0	0	0	0	0	0	0	0	0	0	0	0	0	0	0	0	0	0	0	0.029479	0	0	0	0	0	0	0	0	0	0	0	0	0	0	0	0	0	0	0	0
Seita.1G118100	0.991178	0.859828	1.27817	0.036836	0.119587	0.033953	0.119835	0.173702	0.156588	0.619629	0.319588	0.275805	0.430717	0.356799	0.364088	0	0.014453	0	0	0.06582	0.037673	0.105145	0.067714	0.122539	0.542045	0.662061	0.714673	1.25802	1.33866	1.16184	1.55839	0.144001	0.543434	0	0.051249	0.026543	0.066773	0.125231	0.01245	0.012521	0	0.036263	0.034213	0.040841	0.013552	0.244811	0.156571	0.198977	0.186602
Seita.1G118200	0.01964	0.042281	0.016848	0.047174	0.064791	0.021802	0	0.073307	0	0	0	0	0	0	0	0	0	0	0	0	0	0	0	0	0	0	0.022407	0	0	0	0	0	0.082501	0	0	0	0	0	0	0.023933	0	0	0	0.039458	0.051805	0	0	0	0
Seita.1G118300	12.1583	10.7196	10.4168	13.6758	16.2648	12.4882	33.0758	29.9599	22.3185	0.046282	0.234817	0	11.8744	8.66118	10.0936	18.339	25.7567	23.8104	0.055997	0.051908	0.194777	10.1972	11.3344	8.04791	21.6589	22.4733	18.3709	0.230072	0.413932	0.096203	10.6131	7.74062	11.4612	18.9398	23.5644	19.0604	0	0	0	5.65323	14.2943	9.87477	48.0615	39.4649	30.3012	0.078736	0	0.095706	9.35658
Seita.1G118400	14.4174	18.2599	16.8356	29.9452	23.5316	26.2244	7.40006	8.0952	7.95383	17.0687	19.8218	18.3263	19.606	13.6473	22.5846	11.2318	10.9546	13.2855	16.9153	15.5024	16.76	27.1815	25.4495	18.382	20.5269	21.1923	18.5213	26.6756	26.9544	17.1187	44.0971	47.7771	38.5716	18.9389	19.753	21.431	22.6764	22.6642	16.1712	40.0194	28.3365	30.7936	7.0046	7.47174	8.37977	17.847	17.5391	16.1087	28.1414
Seita.1G118500	21.3347	21.7319	24.1907	21.5394	21.684	20.0077	41.1711	15.8913	15.4877	24.0968	22.4793	19.9123	10.0414	29.2177	26.2887	36.9461	16.237	35.7809	11.4948	20.3742	20.8939	32.0843	29.5723	25.9979	14.0989	15.2101	29.4583	11.8539	8.94025	8.14358	36.3824	25.8097	8.98529	37.7034	19.1039	19.1854	13.6213	14.5125	26.8114	10.8709	13.103	10.9245	36.7991	34.318	33.9156	16.0087	16.2967	17.6212	21.618
Seita.1G118600	10.2213	9.33439	10.5405	9.94278	10.1806	11.5162	2.37048	2.72829	2.93723	24.787	40.6674	23.1476	41.9024	23.3671	9.14494	2.98517	2.55623	3.13948	6.47604	4.60387	6.25275	10.9949	11.9819	28.9677	2.68217	2.20343	1.75881	59.4804	43.0783	22.0225	0.910628	10.3094	6.06679	1.11364	0.95446	1.28418	18.1132	18.4597	20.481	7.23397	10.7483	4.0421	2.93914	2.3316	2.92912	9.68167	11.6993	11.6394	3.79365
Seita.1G118700	5.55899	10.1397	11.0433	8.65334	12.3647	8.64215	1.3627	0.76902	0.975845	7.32833	14.8523	6.735	8.90247	8.37369	15.0885	2.34003	2.56438	3.12759	3.46032	2.06738	1.98482	26.9139	24.021	7.29122	4.04625	3.25506	2.2646	13.3404	9.94169	1.79437	35.1657	17.6512	11.794	3.87441	4.69111	6.15094	6.8829	6.26214	5.72727	20.723	18.2804	24.8496	1.63228	1.24834	0.92144	2.69674	4.11522	3.60779	21.665
Seita.1G118800	50.6813	52.5203	55.0029	50.8881	50.2741	54.2127	38.8804	38.5615	29.2983	43.062	50.9056	33.0561	49.2986	66.6198	43.1836	60.0725	54.042	50.735	60.0741	59.4236	56.4788	86.9349	65.1883	73.2952	37.6884	37.6233	28.1707	55.8521	54.8472	27.2506	29.6244	43.8837	35.3472	40.9726	39.077	42.344	54.9719	59.9265	56.2053	49.837	61.8588	48.0025	36.0956	40.4321	32.7208	40.1347	42.6342	42.8424	51.8595
Seita.1G118900	0.282897	0.461439	0.302378	0.699556	0.391783	0.39687	0.497604	0.403826	0.582677	0.362703	0.213819	0.382979	0.470756	0.233353	0	0.389815	0.598491	0.233519	0.28032	0.395298	0.386504	0.316706	0.300891	0.187526	0.825134	0.365074	1.68748	0.565503	0.273356	1.35362	0.350526	0.173867	0.752637	0.983363	0.430326	0.797418	1.50839	1.02411	1.18248	0.969258	0.255168	0.79311	2.4832	4.01359	1.65325	1.75984	1.65053	2.00648	2.125
Seita.1G119000	0.817188	0.390215	0.880347	1.20486	0.81247	0.57423	0.489464	0.435349	0.355212	0.872106	0.674889	0.408243	0.212773	0.297229	0.445731	0.422088	0.368693	0.457493	0.536888	0.77828	0.422482	0.49002	0.566049	0.60069	0.229847	0.470366	0.863497	1.22327	1.2947	0.657219	1.21455	0.318573	0.965787	0.715876	0.642117	0.572221	1.22865	0.646193	1.18964	0.421545	0.62704	0.869319	1.43497	2.18307	1.69233	1.59832	1.51066	0.906314	1.04295
Seita.1G119100	0.276266	0.417265	0.559575	0.546764	0.836951	0.910227	1.23934	0.887545	1.34402	3.11288	1.73064	2.77513	1.68627	1.14846	1.17488	1.27851	1.56331	1.32263	1.73715	1.17942	0.487281	2.84794	3.23368	1.17038	2.97049	4.35301	2.77181	3.30536	1.65906	2.88353	3.65234	2.13661	3.49639	1.66319	2.55736	2.7817	1.99286	2.96616	1.07989	3.19271	2.3864	2.20341	0.580502	0.805095	0.684228	0.991785	0.704552	0.920061	1.12088
Seita.1G119200	0.026357	0	0.186024	0.031486	0.051103	0.20145	0.05899	0.130262	0.07991	0.218174	0.076207	0	0.25197	0.382715	0.185036	0.071397	0.115542	0	0.152354	0	0.225604	0.315378	0.307123	0.150128	0.076089	0	0.057135	0.147383	0.252311	0.052287	2.30152	0.345143	0.277784	0.095208	0.136653	0	0.136617	0.101054	0	0.193182	0.122889	0.52851	0.02905	0	0	0.052855	0.022431	0.023744	0
Seita.1G119300	0.102193	0.159949	0.524576	0.407065	0.35535	0.375634	0	0.026633	0.079859	0.030712	0.05084	0.071943	0.5779	0.217764	0.026709	39.6929	49.1958	51.1601	43.7536	50.4374	45.5618	59.9862	60.1393	49.6975	0	0.113647	0.196614	0.093409	0.235377	0.328271	1.05507	0.262672	0.177535	64.9043	67.6027	68.0066	56.1869	67.3842	59.045	56.1076	67.0067	63.3389	0.371142	0.466501	0.448216	0.784437	0.694687	0.616152	1.1975
[truncated: 31,044 more rows]
[truncated: 41 more columns]
