# Supplementary material for: Response of Multiple Tissues to Drought Revealed by a Weighted Gene Co-Expression Network Analysis in Foxtail Millet [Setaria italica (L.) P. Beauv.]
Source: Front Plant Sci. 2022 Jan 12;12:746166. doi: 10.3389/fpls.2021.746166 (PMC8790073; doi:10.3389/fpls.2021.746166)
Supplement: Supplementary Table S3 — DEGs identified in all samples between normal and drought conditions. [file Table_3.XLSX]

## Sheet: Supplementary Table S3
Supplementary Table S3: DEGs identified in all samples between normal and drought conditions
Comparison：	Ci134 Root Drought vs. Normal				Comparison：	Ci134 Stem Drought vs. Normal				Comparison：	Ci134 Leaf Drought vs. Normal				Comparison：	Ci328 Root Drought vs. Normal				Comparison：	Ci328 Stem Drought vs. Normal				Comparison：	Ci328 Leaf Drought vs. Normal				Comparison：	Ci409 Root Drought vs. Normal				Comparison：	Ci409 Stem Drought vs. Normal				Comparison：	Ci409 Leaf Drought vs. Normal				Comparison：	Ci603 Root Drought vs. Normal
Total DEGs：	3497				Total DEGs：	2013				Total DEGs：	2557				Total DEGs：	5656				Total DEGs：	1454				Total DEGs：	3776				Total DEGs：	4583				Total DEGs：	587				Total DEGs：	3117				Total DEGs：	6007
Up-regulated:	921				Up-regulated:	709				Up-regulated:	1232				Up-regulated:	1811				Up-regulated:	631				Up-regulated:	1607				Up-regulated:	1544				Up-regulated:	219				Up-regulated:	1298				Up-regulated:	2161
Down-regulated:	2576				Down-regulated:	1304				Down-regulated:	1325				Down-regulated:	3845				Down-regulated:	823				Down-regulated:	2169				Down-regulated:	3039				Down-regulated:	368				Down-regulated:	1819				Down-regulated:	3846
GeneID	FDR	log2FC	regulated		GeneID	FDR	log2FC	regulated		GeneID	FDR	log2FC	regulated		GeneID	FDR	log2FC	regulated		GeneID	FDR	log2FC	regulated		GeneID	FDR	log2FC	regulated		GeneID	FDR	log2FC	regulated		GeneID	FDR	log2FC	regulated		GeneID	FDR	log2FC	regulated		GeneID	FDR	log2FC	regulated
Seita.1G001900	0.0489801	1.22563	up		Seita.1G003000	0.00637982	-3.19744	down		Seita.1G001900	0.000345892	1.42894	up		Seita.1G000300	0.014471	-1.43824	down		Seita.1G001100	0.0100897	1.50028	up		Seita.1G001900	2.10942e-05	-1.03321	down		Seita.1G001100	1.16908e-11	1.67141	up		Seita.1G012200	0.000129027	3.47886	up		Seita.1G000100	0.0138776	1.66738	up		Seita.1G000300	2.05077e-05	1.56286	up
Seita.1G002800	0.0101993	1.84167	up		Seita.1G005400	4.03071e-07	-3.5009	down		Seita.1G002000	0.036743	1.1107	up		Seita.1G000400	2.55295e-09	1.2026	up		Seita.1G007700	0.00425645	-2.70077	down		Seita.1G002000	5.93675e-08	-1.60818	down		Seita.1G002000	2.99627e-06	1.13132	up		Seita.1G016300	0.000348432	-4.55141	down		Seita.1G001100	0.0485419	1.13131	up		Seita.1G000700	0.000512143	-2.12003	down
Seita.1G004400	1.42296e-05	-2.68928	down		Seita.1G005900	0.048448	-1.65493	down		Seita.1G002800	0.0190058	1.82078	up		Seita.1G001900	2.24358e-10	2.23296	up		Seita.1G012200	0.00233341	3.14199	up		Seita.1G004600	3.51172e-116	6.29704	up		Seita.1G002800	0.0109526	1.34795	up		Seita.1G019800	0.0242606	-3.31435	down		Seita.1G001900	1.53617e-12	-1.99317	down		Seita.1G002000	6.62136e-10	2.06987	up
Seita.1G005000	0.0111078	1.35039	up		Seita.1G006000	0.0414278	1.96789	up		Seita.1G005000	0.00232465	1.57796	up		Seita.1G002200	4.22382e-07	1.07007	up		Seita.1G012800	5.49781e-05	-2.31774	down		Seita.1G005000	0.00104878	1.37587	up		Seita.1G003700	9.08889e-07	1.56312	up		Seita.1G023100	0.0439483	-4.00163	down		Seita.1G002800	0.0429732	1.19886	up		Seita.1G002800	0.000406834	2.01364	up
Seita.1G005600	0.0447427	1.13946	up		Seita.1G008400	0.000623421	2.72266	up		Seita.1G005400	0.00759352	-1.71275	down		Seita.1G002800	1.62718e-05	2.18099	up		Seita.1G015100	1.52374e-07	2.795	up		Seita.1G005400	9.17763e-08	-2.24674	down		Seita.1G004400	0.00434922	-2.41743	down		Seita.1G025800	0.0284744	3.1678	up		Seita.1G003200	0.00267464	-1.05234	down		Seita.1G002900	0.00124016	1.92395	up
Seita.1G006400	0.000177716	-2.83804	down		Seita.1G011800	0.000253765	-2.80051	down		Seita.1G005600	0.00974639	1.84651	up		Seita.1G003000	0.0278555	-1.16969	down		Seita.1G019800	0.0300377	-6.95449	down		Seita.1G006200	0.0427679	1.12213	up		Seita.1G005000	7.11143e-06	2.12476	up		Seita.1G043800	0.0173424	-2.88235	down		Seita.1G004600	4.90477e-08	6.14154	up		Seita.1G003000	0.0080178	-1.33948	down
Seita.1G007900	0.000997861	-1.70017	down		Seita.1G012200	0.00266467	2.90785	up		Seita.1G008800	0.0476418	-1.14326	down		Seita.1G003700	1.30119e-07	2.01567	up		Seita.1G023000	0.0166561	-1.42752	down		Seita.1G007700	3.25889e-10	-1.46245	down		Seita.1G005600	1.3111e-22	2.76218	up		Seita.1G045200	2.78294e-06	4.42365	up		Seita.1G004900	0.0074536	3.38828	up		Seita.1G003300	4.56899e-05	-2.43043	down
Seita.1G012200	0.000771237	1.99186	up		Seita.1G016000	0.00101813	-2.9842	down		Seita.1G011800	0.0224542	-1.79676	down		Seita.1G004400	4.09779e-05	-4.10845	down		Seita.1G024100	0.0342243	1.66045	up		Seita.1G007800	1.47849e-18	-1.80852	down		Seita.1G006400	6.99042e-09	-2.67797	down		Seita.1G048200	0.0465509	-3.28547	down		Seita.1G005000	0.00326653	2.2676	up		Seita.1G003700	1.65297e-05	1.59087	up
Seita.1G012600	0.0195258	-1.45779	down		Seita.1G019500	0.00125671	3.26213	up		Seita.1G012200	0.00821064	1.16319	up		Seita.1G004600	0.000302018	-2.09736	down		Seita.1G025800	1.70128e-08	3.24543	up		Seita.1G007900	1.1137e-21	-1.95414	down		Seita.1G007900	6.03283e-08	-1.34189	down		Seita.1G063500	0.00591718	1.99268	up		Seita.1G005400	0.00065208	-2.02195	down		Seita.1G004600	6.44754e-07	-2.04504	down
Seita.1G012900	0.00175058	-2.10968	down		Seita.1G020100	3.05579e-05	-4.81494	down		Seita.1G013800	0.0239647	-1.48578	down		Seita.1G005000	2.68559e-05	2.67874	up		Seita.1G028700	0.000496503	-3.07547	down		Seita.1G008600	2.52115e-08	-1.23933	down		Seita.1G008300	0.00604686	-1.64404	down		Seita.1G074200	0.000957026	-2.46806	down		Seita.1G005600	0.0010004	1.67801	up		Seita.1G005000	0.000552732	3.89012	up
Seita.1G013900	0.0213476	-1.14479	down		Seita.1G021300	0.000733136	-2.86254	down		Seita.1G013900	0.00379911	-1.22202	down		Seita.1G005400	0.00103226	-1.12531	down		Seita.1G033600	0.0038851	-3.16431	down		Seita.1G011800	0.0039647	-3.24175	down		Seita.1G008600	0.00015964	-1.3026	down		Seita.1G075000	0.0241767	3.09985	up		Seita.1G007200	3.64055e-09	-1.55803	down		Seita.1G005600	1.07533e-09	2.23533	up
Seita.1G014800	0.0182306	-2.09031	down		Seita.1G023000	0.000106101	-2.67707	down		Seita.1G014700	7.64892e-09	-2.4028	down		Seita.1G005600	5.59215e-15	5.01935	up		Seita.1G036700	0.00033656	-2.43646	down		Seita.1G012200	2.8175e-30	2.38081	up		Seita.1G009100	0.00678901	-1.0956	down		Seita.1G075800	0.0433016	-2.19876	down		Seita.1G007800	6.11881e-06	-1.13403	down		Seita.1G005700	2.93258e-06	-1.31728	down
Seita.1G014900	0.000102135	-2.47643	down		Seita.1G023100	0.000928755	-2.37633	down		Seita.1G015800	6.74165e-10	5.65289	up		Seita.1G008500	6.03022e-09	-3.39207	down		Seita.1G038300	0.00482596	-3.16399	down		Seita.1G012700	2.34118e-11	1.45642	up		Seita.1G011400	6.74004e-05	1.53192	up		Seita.1G080600	4.8804e-13	5.07589	up		Seita.1G007900	5.10539e-14	-1.84518	down		Seita.1G006400	1.32717e-17	-4.08423	down
Seita.1G016400	3.37181e-06	-2.6063	down		Seita.1G024300	0.00889134	-1.95814	down		Seita.1G015900	1.22816e-06	-4.63485	down		Seita.1G008600	0.000299562	-1.50211	down		Seita.1G039400	0.0334039	-2.47515	down		Seita.1G013500	1.71825e-12	1.4495	up		Seita.1G011800	0.00935076	-1.91534	down		Seita.1G094200	0.00535809	-3.62557	down		Seita.1G008600	1.51348e-11	-1.70503	down		Seita.1G007600	0.0036066	2.01207	up
Seita.1G017900	0.0221703	-1.82269	down		Seita.1G025800	1.33246e-05	2.84302	up		Seita.1G019500	2.61923e-06	1.98553	up		Seita.1G011100	0.00525095	1.30523	up		Seita.1G042300	0.000107518	4.51781	up		Seita.1G013900	8.76261e-17	-1.69323	down		Seita.1G012200	1.30648e-10	1.50466	up		Seita.1G098900	0.00535809	-1.9361	down		Seita.1G008800	0.00205565	-1.0209	down		Seita.1G007700	2.65748e-06	1.85158	up
Seita.1G019500	6.14736e-08	2.46733	up		Seita.1G028300	0.0443074	1.64004	up		Seita.1G020100	0.0191991	-1.37196	down		Seita.1G011600	0.045935	1.03844	up		Seita.1G043700	1.433e-08	-3.59159	down		Seita.1G014700	5.05901e-06	-1.12752	down		Seita.1G012900	0.00776968	-1.17862	down		Seita.1G099100	0.00141593	-2.40407	down		Seita.1G011800	0.00190616	-3.21432	down		Seita.1G007800	3.42567e-09	2.00831	up
Seita.1G019800	0.0166554	-1.81066	down		Seita.1G031100	0.0144329	-3.40651	down		Seita.1G022500	0.00169534	-6.33882	down		Seita.1G011800	2.80161e-07	-2.10987	down		Seita.1G044800	0.0222412	1.60782	up		Seita.1G014800	3.83182e-06	-2.08389	down		Seita.1G013400	1.28257e-25	5.33007	up		Seita.1G099700	0.017882	4.65597	up		Seita.1G012200	5.92297e-19	2.15382	up		Seita.1G009100	0.0114533	-1.189	down
Seita.1G021500	0.00247567	-2.4503	down		Seita.1G033000	0.00150429	-3.57768	down		Seita.1G023100	1.15607e-05	-3.42284	down		Seita.1G012200	2.1917e-33	2.44628	up		Seita.1G044900	0.00648225	3.044	up		Seita.1G014900	1.0365e-05	-1.22488	down		Seita.1G013500	5.1833e-16	2.03515	up		Seita.1G114200	0.0405689	-1.66098	down		Seita.1G012400	8.40871e-07	-1.22515	down		Seita.1G011600	0.00220099	1.90375	up
Seita.1G021600	0.0103949	-2.32386	down		Seita.1G034900	3.26641e-10	5.17838	up		Seita.1G024000	0.00213158	2.3584	up		Seita.1G012900	3.67249e-06	-2.25904	down		Seita.1G045400	1.8451e-07	-2.91156	down		Seita.1G015900	2.92661e-17	-3.54062	down		Seita.1G014800	4.48614e-10	-1.85958	down		Seita.1G116400	0.0141535	-2.31082	down		Seita.1G013300	0.00150311	-2.33211	down		Seita.1G012000	0.000428487	1.17943	up
Seita.1G021900	0.0236093	-1.44092	down		Seita.1G040000	0.0125607	-3.0776	down		Seita.1G024100	0.0174094	-1.13965	down		Seita.1G013400	1.42237e-21	6.66165	up		Seita.1G054400	0.0194318	-3.05818	down		Seita.1G016500	1.90365e-05	-1.12707	down		Seita.1G014900	1.27012e-06	-1.52544	down		Seita.1G116500	0.000335402	-6.7602	down		Seita.1G013500	4.14874e-06	1.15496	up		Seita.1G012200	3.49433e-05	3.09572	up
Seita.1G022400	0.00274855	-4.11159	down		Seita.1G041500	0.0340781	-2.16374	down		Seita.1G024200	0.010271	2.0554	up		Seita.1G014700	0.0225166	-1.30862	down		Seita.1G055500	0.0102673	-1.47926	down		Seita.1G019100	8.10926e-05	-2.75113	down		Seita.1G015100	0.000220628	1.04587	up		Seita.1G123600	5.9946e-05	-3.58248	down		Seita.1G013900	9.92051e-07	-1.22203	down		Seita.1G012500	1.17464e-05	-1.29766	down
Seita.1G022700	0.0344111	-1.46411	down		Seita.1G042000	0.0427114	-2.31525	down		Seita.1G025800	3.65041e-15	6.25532	up		Seita.1G014800	1.20017e-16	-2.97909	down		Seita.1G063500	0.00718927	2.71712	up		Seita.1G019500	2.43482e-21	2.05468	up		Seita.1G015800	1.6195e-54	4.75664	up		Seita.1G144700	0.00225198	-2.07704	down		Seita.1G014700	2.46039e-09	-1.80611	down		Seita.1G012600	0.00219004	1.65309	up
Seita.1G024100	0.02851	1.36305	up		Seita.1G042300	0.0285299	2.5495	up		Seita.1G027100	1.59535e-05	-3.52087	down		Seita.1G014900	2.03607e-07	-2.06788	down		Seita.1G063700	0.0483601	-2.83183	down		Seita.1G020600	2.69478e-07	1.9489	up		Seita.1G016400	9.69644e-09	-1.73238	down		Seita.1G145300	0.0494468	3.04403	up		Seita.1G016500	4.35786e-08	-1.57518	down		Seita.1G012900	1.84454e-07	-1.91795	down
Seita.1G025100	0.0274834	-1.38672	down		Seita.1G042800	0.0116863	-3.92328	down		Seita.1G028000	0.00031244	-1.73019	down		Seita.1G015100	8.89391e-08	1.5458	up		Seita.1G065200	0.0111178	-1.77602	down		Seita.1G023000	0.00274769	-1.68735	down		Seita.1G016700	0.00301269	1.34737	up		Seita.1G149000	0.00178831	-4.2184	down		Seita.1G016700	3.78683e-05	-2.0838	down		Seita.1G013400	2.25872e-37	5.78863	up
Seita.1G027100	0.027531	-1.62127	down		Seita.1G043800	0.00116689	-5.28356	down		Seita.1G028800	1.60318e-08	-4.11381	down		Seita.1G015800	3.58275e-57	5.83136	up		Seita.1G067300	0.0263632	-1.35877	down		Seita.1G023100	4.84367e-07	-3.29817	down		Seita.1G017900	0.0272509	-1.16975	down		Seita.1G167400	2.23202e-08	-5.45911	down		Seita.1G019100	1.5691e-07	-1.62472	down		Seita.1G014800	0.00012847	-1.33308	down
Seita.1G027700	0.0187409	-1.27425	down		Seita.1G043900	0.00692471	-4.16321	down		Seita.1G029700	0.000923845	6.46807	up		Seita.1G016000	3.51512e-13	-1.46709	down		Seita.1G070100	0.0104102	-3.46335	down		Seita.1G024200	0.0420749	1.26797	up		Seita.1G018700	9.80441e-10	-4.25483	down		Seita.1G171900	3.46017e-05	-3.26424	down		Seita.1G019500	1.99647e-06	1.23963	up		Seita.1G015100	0.00119695	1.05573	up
Seita.1G028700	0.000139793	-1.708	down		Seita.1G045200	0.000136385	4.38744	up		Seita.1G029900	0.0005536	6.10557	up		Seita.1G017900	8.56699e-07	-2.67473	down		Seita.1G071800	0.0130403	-1.6309	down		Seita.1G025100	1.41638e-05	-2.20544	down		Seita.1G018800	2.55115e-05	-2.11126	down		Seita.1G178900	0.00260842	-2.25317	down		Seita.1G021500	0.000805303	-1.94537	down		Seita.1G015800	5.6882e-11	4.03481	up
Seita.1G031100	1.14067e-06	-2.2171	down		Seita.1G046800	0.0154061	-1.95027	down		Seita.1G030000	0.0014034	5.92771	up		Seita.1G018800	1.98132e-09	-3.52031	down		Seita.1G074200	0.0079623	-2.51418	down		Seita.1G025200	0.0300937	-1.28108	down		Seita.1G019400	2.0154e-07	-2.06546	down		Seita.1G180600	0.00135087	-2.62954	down		Seita.1G022500	2.60003e-32	-11.0659	down		Seita.1G016400	0.00135503	-1.25396	down
Seita.1G031500	0.000336616	-2.08379	down		Seita.1G048200	0.0186145	-2.88159	down		Seita.1G031100	4.13252e-07	-6.07595	down		Seita.1G019400	0.00449271	-1.41738	down		Seita.1G075800	0.00260051	-1.81915	down		Seita.1G025800	2.24025e-06	5.58543	up		Seita.1G019500	2.05469e-19	2.22012	up		Seita.1G185300	0.0125034	2.94897	up		Seita.1G023100	0.00214099	-2.41618	down		Seita.1G016900	7.95003e-13	-5.11944	down
Seita.1G033800	0.000135619	3.36265	up		Seita.1G050400	0.00149042	-2.39926	down		Seita.1G031600	0.0283079	-1.18781	down		Seita.1G019500	1.74694e-32	2.82108	up		Seita.1G079000	0.0178911	-2.06243	down		Seita.1G026500	5.78076e-09	2.86499	up		Seita.1G019600	0.00733581	-1.50749	down		Seita.1G195200	0.040326	1.56983	up		Seita.1G025800	2.09081e-18	6.0822	up		Seita.1G017900	1.78843e-05	-2.26501	down
Seita.1G034500	0.0386627	1.09033	up		Seita.1G054800	0.0333168	1.75706	up		Seita.1G034900	2.80498e-11	4.6209	up		Seita.1G019600	0.000372531	-1.88417	down		Seita.1G080600	0.00213382	7.08541	up		Seita.1G027600	7.43128e-07	1.63088	up		Seita.1G021900	6.0614e-05	-1.38454	down		Seita.1G210300	0.0043669	2.05165	up		Seita.1G026500	0.0224115	1.22233	up		Seita.1G018400	0.000419584	-2.14626	down
Seita.1G034600	0.00319476	-2.96017	down		Seita.1G055500	0.00962331	-1.81505	down		Seita.1G035200	4.56287e-11	-2.58959	down		Seita.1G020300	0.0396511	1.19282	up		Seita.1G090900	0.00182675	-1.86004	down		Seita.1G028400	6.41015e-05	-1.48341	down		Seita.1G022400	0.0101236	-2.1729	down		Seita.1G210800	0.0370953	-1.65349	down		Seita.1G028200	2.8578e-08	3.45719	up		Seita.1G018700	4.98814e-11	-4.17849	down
Seita.1G035400	0.0338818	-1.90008	down		Seita.1G056000	0.0467959	-1.63224	down		Seita.1G035400	0.00488663	2.57008	up		Seita.1G021400	0.000431604	-1.02864	down		Seita.1G091700	0.0261232	1.64323	up		Seita.1G028700	0.018606	-2.529	down		Seita.1G022700	0.00284686	-1.43359	down		Seita.1G222100	0.045969	-1.61024	down		Seita.1G028400	0.000364413	-1.21416	down		Seita.1G018800	4.90433e-12	-3.75333	down
Seita.1G035500	0.0385262	-1.70631	down		Seita.1G063500	0.00180032	2.48327	up		Seita.1G036400	0.00445125	2.22165	up		Seita.1G021500	3.59158e-06	-1.83582	down		Seita.1G096800	0.0167036	-2.37991	down		Seita.1G028800	2.89596e-06	-2.0454	down		Seita.1G022900	0.0288347	-1.03145	down		Seita.1G239000	0.0295222	1.6457	up		Seita.1G028700	2.45392e-10	-1.55158	down		Seita.1G019100	0.000199141	1.37325	up
Seita.1G036400	3.4796e-05	-2.93587	down		Seita.1G064400	0.0049345	4.82945	up		Seita.1G036500	0.0220369	1.81999	up		Seita.1G021600	1.47192e-05	-2.55654	down		Seita.1G096900	4.91252e-05	-2.79299	down		Seita.1G028900	6.30896e-10	-1.76128	down		Seita.1G024100	2.68588e-10	2.28245	up		Seita.1G241300	0.000243457	-2.59865	down		Seita.1G028800	0.000346035	1.32856	up		Seita.1G019400	0.00419815	-1.49642	down
Seita.1G036500	0.000273975	-2.38591	down		Seita.1G065200	0.0121787	-1.85379	down		Seita.1G038400	0.00120165	1.59575	up		Seita.1G021900	8.2958e-07	-2.65135	down		Seita.1G097800	0.00530184	-1.62713	down		Seita.1G030600	0.00029598	-1.95615	down		Seita.1G025100	0.000760217	-1.56701	down		Seita.1G241900	0.0322774	-4.3717	down		Seita.1G030600	0.000134366	-2.76421	down		Seita.1G019500	2.95853e-22	2.78578	up
Seita.1G038600	0.00476998	-2.11334	down		Seita.1G071700	0.000389735	-3.3966	down		Seita.1G039200	0.015124	2.4727	up		Seita.1G022400	9.08159e-14	-4.39357	down		Seita.1G098900	0.00816438	-1.58869	down		Seita.1G031100	4.52297e-40	-6.19044	down		Seita.1G025800	9.59938e-20	3.65789	up		Seita.1G251600	0.0278965	2.98697	up		Seita.1G031100	0.0124403	-1.93273	down		Seita.1G019600	0.0456049	-1.59717	down
Seita.1G039700	0.00102688	-2.46596	down		Seita.1G071800	0.0204302	-1.76339	down		Seita.1G041700	0.000852804	-1.88157	down		Seita.1G022500	6.74799e-08	6.41689	up		Seita.1G099200	0.00976542	1.61309	up		Seita.1G031600	0.000194196	-1.16562	down		Seita.1G027700	0.00278559	1.24731	up		Seita.1G253700	0.00736386	5.47358	up		Seita.1G034600	0.00020373	-3.20001	down		Seita.1G019800	0.000149035	-2.21592	down
Seita.1G041000	5.98576e-05	-2.28238	down		Seita.1G072700	0.0031094	-2.14857	down		Seita.1G041900	0.000389329	-1.95815	down		Seita.1G022700	0.0454508	-1.17761	down		Seita.1G099600	0.0176147	1.67463	up		Seita.1G032000	2.70941e-08	-1.21277	down		Seita.1G027900	0.02972	1.08793	up		Seita.1G276200	0.0124548	1.92142	up		Seita.1G034900	4.22418e-06	2.75453	up		Seita.1G021400	0.00106056	-1.02704	down
Seita.1G041300	0.0180369	1.1736	up		Seita.1G072900	0.0117803	2.73559	up		Seita.1G042000	0.00632194	-1.45319	down		Seita.1G023000	0.000645965	-1.74838	down		Seita.1G107400	1.37395e-06	2.58371	up		Seita.1G034900	1.15844e-06	4.94935	up		Seita.1G028000	1.65688e-09	1.83973	up		Seita.1G276600	0.0333927	-1.68788	down		Seita.1G035200	2.15829e-08	-1.59015	down		Seita.1G021500	2.22429e-09	-2.32598	down
Seita.1G041400	0.00635521	-1.88965	down		Seita.1G075800	0.0361236	-1.59737	down		Seita.1G043900	0.00171161	-3.01465	down		Seita.1G024000	0.0442811	-1.11218	down		Seita.1G110700	0.000326104	-7.0843	down		Seita.1G035200	9.45142e-08	-1.9444	down		Seita.1G030500	1.27359e-07	-Inf	down		Seita.1G279800	0.000673093	2.20176	up		Seita.1G035400	0.000135708	1.86946	up		Seita.1G021900	0.00172312	-1.25861	down
Seita.1G041700	2.32899e-06	-4.73593	down		Seita.1G078600	0.00950095	-3.1244	down		Seita.1G044500	0.00530296	1.36305	up		Seita.1G024100	8.41144e-08	2.17081	up		Seita.1G112800	0.0324489	-2.65793	down		Seita.1G035400	0.000476627	1.70152	up		Seita.1G031100	4.98079e-07	-1.16711	down		Seita.1G282300	0.000673112	-2.21702	down		Seita.1G039400	0.00454195	1.41872	up		Seita.1G022300	8.91813e-08	-5.61719	down
Seita.1G042000	0.00020977	2.73977	up		Seita.1G079000	0.0188797	-1.97055	down		Seita.1G044800	0.0423463	1.4925	up		Seita.1G024400	0.000110377	1.15675	up		Seita.1G113000	0.0389722	-1.58596	down		Seita.1G038400	0.0193095	-1.37676	down		Seita.1G031500	7.50503e-06	-1.45847	down		Seita.1G291000	0.00765001	1.872	up		Seita.1G040100	0.00145034	1.6762	up		Seita.1G022400	0.00298757	-2.25347	down
Seita.1G045200	8.10497e-06	4.86569	up		Seita.1G080600	1.11617e-20	7.23483	up		Seita.1G045000	5.56745e-05	1.92698	up		Seita.1G025800	1.02615e-12	2.25684	up		Seita.1G116600	0.0227601	-2.70152	down		Seita.1G040000	0.000567974	1.8731	up		Seita.1G033700	0.0058865	1.4494	up		Seita.1G295700	0.0450304	-4.66292	down		Seita.1G041900	2.52967e-25	-2.66801	down		Seita.1G022700	0.000230886	-1.7182	down
Seita.1G046800	8.30201e-08	-3.43345	down		Seita.1G080900	0.0256259	-3.29474	down		Seita.1G045400	2.32089e-08	-4.83481	down		Seita.1G027700	0.0249397	1.07572	up		Seita.1G121600	0.0483257	-1.46688	down		Seita.1G041600	0.00031728	-1.01591	down		Seita.1G033800	6.67443e-40	3.41506	up		Seita.1G299400	0.0290781	-1.95379	down		Seita.1G042400	1.83991e-10	1.65327	up		Seita.1G023000	0.00356139	-1.53171	down
Seita.1G046900	0.0276901	-1.10283	down		Seita.1G086900	0.0158229	-3.15013	down		Seita.1G046300	0.000699627	-1.41468	down		Seita.1G028000	1.22066e-10	1.32525	up		Seita.1G123600	0.0165529	-2.70342	down		Seita.1G041900	1.43074e-23	-2.29761	down		Seita.1G034600	7.38324e-05	-2.02934	down		Seita.1G308900	0.00886785	2.77554	up		Seita.1G043900	0.00261052	-2.1054	down		Seita.1G024000	0.00326244	1.76132	up
Seita.1G047500	0.0184563	1.37618	up		Seita.1G090900	0.0212652	-1.8039	down		Seita.1G050100	0.0108957	-1.15016	down		Seita.1G028900	3.20648e-13	1.61292	up		Seita.1G123900	0.0309438	-1.47075	down		Seita.1G042000	0.00123343	-1.01728	down		Seita.1G034900	1.01827e-06	1.31484	up		Seita.1G310000	0.013903	-2.92841	down		Seita.1G044400	0.00241473	-1.82593	down		Seita.1G024100	2.82528e-05	1.79434	up
Seita.1G050400	0.000196147	-1.73197	down		Seita.1G091700	0.0460918	2.31482	up		Seita.1G054400	0.00406396	-2.23802	down		Seita.1G031100	1.73831e-05	-1.27926	down		Seita.1G128600	3.5415e-05	2.67221	up		Seita.1G043800	1.78613e-15	2.65062	up		Seita.1G035400	3.45416e-06	-1.05979	down		Seita.1G325200	0.0494251	-1.56732	down		Seita.1G044800	2.76465e-06	2.43725	up		Seita.1G025800	1.78896e-25	3.33311	up
Seita.1G056300	2.92971e-06	-3.60044	down		Seita.1G092000	0.0329787	-1.69266	down		Seita.1G057100	0.0347592	-1.39723	down		Seita.1G031400	1.0075e-13	-1.57485	down		Seita.1G133200	0.028554	-1.4752	down		Seita.1G043900	0.00400496	-1.44854	down		Seita.1G035500	0.000559622	-1.94744	down		Seita.1G326600	8.67494e-05	3.81322	up		Seita.1G045000	0.000206216	1.63373	up		Seita.1G027700	0.0407844	1.02158	up
Seita.1G058700	0.000161527	-1.83499	down		Seita.1G092300	0.0156415	1.90091	up		Seita.1G057300	0.00886784	1.14886	up		Seita.1G031500	6.59961e-15	-3.05005	down		Seita.1G141600	0.0415439	1.412	up		Seita.1G044800	9.93192e-06	2.25024	up		Seita.1G035700	5.37639e-12	-1.5256	down		Seita.1G332400	0.00481995	-3.66532	down		Seita.1G045400	0.0256245	-1.46038	down		Seita.1G027900	0.0474211	1.09838	up
Seita.1G059200	0.00033726	-4.32073	down		Seita.1G092700	0.0160462	1.91418	up		Seita.1G058200	0.0123851	-1.30373	down		Seita.1G031600	1.2369e-12	-1.78478	down		Seita.1G142400	0.00793336	-2.87854	down		Seita.1G045400	4.69307e-31	-4.10824	down		Seita.1G036400	1.69509e-27	-3.99655	down		Seita.1G335200	0.00275826	3.56607	up		Seita.1G045700	0.0151024	-1.07116	down		Seita.1G028900	3.51618e-08	1.62343	up
Seita.1G059300	0.000245102	-5.01857	down		Seita.1G094200	0.00438341	-5.81794	down		Seita.1G060000	0.0039456	-1.32264	down		Seita.1G032700	4.22713e-10	3.85356	up		Seita.1G145200	6.69576e-08	-4.49314	down		Seita.1G045600	4.85052e-06	-2.6147	down		Seita.1G037300	0.00325395	1.5499	up		Seita.1G336800	0.0462063	-1.53633	down		Seita.1G046300	2.23063e-07	-1.32892	down		Seita.1G031100	0.00162115	-1.09668	down
Seita.1G060800	0.000258241	-2.57842	down		Seita.1G095100	0.0156275	3.90111	up		Seita.1G060100	0.00175127	-2.18528	down		Seita.1G033800	2.22614e-09	3.04437	up		Seita.1G160000	0.00134048	1.88119	up		Seita.1G045700	0.0132376	-1.05483	down		Seita.1G038300	0.0271549	-1.01829	down		Seita.1G337500	1.14241e-05	-2.8775	down		Seita.1G046400	1.38373e-15	-2.12105	down		Seita.1G031500	0.00127751	-2.03732	down
Seita.1G061000	9.10643e-05	-2.50505	down		Seita.1G095700	0.00970834	-2.03605	down		Seita.1G060800	0.0157362	-1.73362	down		Seita.1G034000	2.39409e-10	1.33103	up		Seita.1G162400	0.0172154	2.46481	up		Seita.1G045800	1.8141e-19	-1.92756	down		Seita.1G038400	0.00511612	-1.56898	down		Seita.1G340100	0.000733648	-5.71441	down		Seita.1G046800	3.99825e-11	-1.78685	down		Seita.1G033700	0.0248066	1.32045	up
Seita.1G064000	8.03107e-06	-Inf	down		Seita.1G097600	0.000291913	-4.22994	down		Seita.1G063500	3.78252e-13	3.85725	up		Seita.1G034600	0.0261618	-4.26896	down		Seita.1G162500	0.0153621	1.6147	up		Seita.1G046400	1.11008e-10	-1.5852	down		Seita.1G039400	2.86178e-07	-2.13667	down		Seita.1G340400	2.23762e-05	-2.87243	down		Seita.1G050300	0.000206334	-1.39973	down		Seita.1G033800	3.7529e-21	3.15111	up
Seita.1G065300	0.00440345	-1.87321	down		Seita.1G097800	1.94028e-05	-2.85679	down		Seita.1G063600	0.00321795	1.29389	up		Seita.1G035400	8.25382e-09	-2.09984	down		Seita.1G166200	0.0100778	-2.88731	down		Seita.1G046800	3.06359e-10	-2.11505	down		Seita.1G039700	0.00019121	-1.68299	down		Seita.1G342400	0.00104161	4.53929	up		Seita.1G050700	0.000835051	-1.20658	down		Seita.1G034000	3.83826e-12	1.83251	up
Seita.1G066900	5.73181e-07	-3.94702	down		Seita.1G098900	0.00287893	-2.11038	down		Seita.1G064400	7.86675e-13	-4.85908	down		Seita.1G035500	7.88671e-06	-2.61439	down		Seita.1G171800	0.0206534	1.61209	up		Seita.1G047000	3.50345e-06	-1.34732	down		Seita.1G040100	2.37939e-06	1.06453	up		Seita.1G342900	0.00681099	-2.89828	down		Seita.1G053900	1.96187e-09	-1.76363	down		Seita.1G034100	3.41759e-05	-3.18764	down
Seita.1G069500	2.2554e-05	2.48404	up		Seita.1G099600	0.00540739	3.41879	up		Seita.1G065200	1.8899e-05	-3.05439	down		Seita.1G036400	3.08358e-11	-4.26171	down		Seita.1G172900	0.0331579	-1.75662	down		Seita.1G050800	0.033514	1.2967	up		Seita.1G040900	1.12445e-05	1.25645	up		Seita.1G346800	0.0169694	3.24276	up		Seita.1G054000	0.0289792	-1.44556	down		Seita.1G034400	0.000158892	-1.03052	down
Seita.1G070400	1.32425e-05	1.97355	up		Seita.1G099700	0.0151725	4.60735	up		Seita.1G065300	3.13622e-06	-2.15555	down		Seita.1G036500	2.03795e-12	-4.40415	down		Seita.1G178300	0.0269245	2.39219	up		Seita.1G054000	0.000836027	-3.66253	down		Seita.1G041000	0.00488442	-1.06496	down		Seita.1G354100	6.76686e-05	-2.78043	down		Seita.1G054800	0.0174304	-1.14102	down		Seita.1G034600	5.27085e-05	-2.20825	down
Seita.1G075900	1.02746e-05	-4.74219	down		Seita.1G103800	0.00320719	-3.05075	down		Seita.1G065400	5.95145e-05	-2.01641	down		Seita.1G037300	0.000271135	1.91929	up		Seita.1G179500	0.00426681	-3.57094	down		Seita.1G054400	2.88516e-29	-4.66818	down		Seita.1G041300	8.69087e-06	1.05026	up		Seita.1G362000	2.77889e-08	-5.73383	down		Seita.1G056700	1.81198e-10	-1.54123	down		Seita.1G035300	0.0318925	-1.06147	down
Seita.1G076100	0.0468614	-1.58293	down		Seita.1G111200	0.00204607	-2.56975	down		Seita.1G065800	0.000816122	1.42359	up		Seita.1G038300	0.00199505	-1.30688	down		Seita.1G180500	0.00370003	-5.72058	down		Seita.1G054900	2.88069e-05	-1.11778	down		Seita.1G041700	9.36133e-15	-2.55852	down		Seita.1G365200	0.000109941	2.63688	up		Seita.1G057100	0.00140354	2.02877	up		Seita.1G035400	3.59538e-12	-1.83328	down
Seita.1G076500	0.00174591	-1.99935	down		Seita.1G111500	0.0140521	-1.96834	down		Seita.1G068700	2.97501e-12	-4.39796	down		Seita.1G038600	2.02865e-05	-2.481	down		Seita.1G180600	0.0181503	-2.09412	down		Seita.1G055500	3.2883e-10	-1.80732	down		Seita.1G044500	1.90338e-11	-1.55549	down		Seita.1G369500	0.0279966	-1.63499	down		Seita.1G057300	4.06249e-05	1.25093	up		Seita.1G035500	0.00156048	-1.89776	down
Seita.1G077100	0.00367433	-1.55944	down		Seita.1G112800	0.00382904	-3.20329	down		Seita.1G068800	9.97255e-06	-1.70965	down		Seita.1G039000	3.48015e-06	2.75024	up		Seita.1G186400	0.000303078	4.6975	up		Seita.1G056700	9.20106e-10	-1.24946	down		Seita.1G044800	0.000106907	1.03414	up		Seita.1G373600	0.000748967	2.39208	up		Seita.1G057500	8.96486e-07	-1.21683	down		Seita.1G035800	0.00987747	-1.42325	down
Seita.1G078500	0.000450242	-3.86298	down		Seita.1G114200	0.00964515	-2.45107	down		Seita.1G069500	3.44679e-06	1.89408	up		Seita.1G039400	3.64486e-11	-1.94679	down		Seita.1G187000	0.0300981	-2.39377	down		Seita.1G057100	2.14999e-05	2.13192	up		Seita.1G045200	1.73605e-23	5.20286	up		Seita.2G000800	0.00825116	-5.03362	down		Seita.1G058000	5.93553e-06	-1.41303	down		Seita.1G036500	9.18036e-08	-2.81339	down
Seita.1G079000	6.45304e-06	-2.94911	down		Seita.1G116400	0.00266467	-2.40982	down		Seita.1G075600	0.00762661	1.24656	up		Seita.1G039700	1.54566e-12	-4.54639	down		Seita.1G191800	0.000676471	-2.84862	down		Seita.1G058700	0.000703626	-1.37658	down		Seita.1G046800	3.14123e-07	-2.26805	down		Seita.2G026400	0.0450988	-1.97667	down		Seita.1G060000	2.31637e-15	-2.20275	down		Seita.1G037000	4.48631e-24	Inf	up
Seita.1G079500	0.00648094	-1.41476	down		Seita.1G116500	1.79234e-09	-10.2027	down		Seita.1G076900	0.000611916	3.99671	up		Seita.1G040000	0.0010074	-1.30325	down		Seita.1G192100	0.000594614	1.88135	up		Seita.1G060000	1.04178e-14	-1.60742	down		Seita.1G047100	0.000929364	-1.49988	down		Seita.2G035400	0.0193724	5.55972	up		Seita.1G060100	6.18062e-06	-1.98113	down		Seita.1G037300	0.000421827	1.8757	up
Seita.1G080400	1.3432e-06	-3.80861	down		Seita.1G116700	0.00432143	-3.72156	down		Seita.1G078200	0.0122851	1.72363	up		Seita.1G041000	2.82429e-12	-2.43434	down		Seita.1G193200	0.0101731	-3.63249	down		Seita.1G060100	9.6553e-11	-2.68417	down		Seita.1G047500	0.0118383	1.00311	up		Seita.2G038600	0.017882	-1.79874	down		Seita.1G060500	5.54455e-10	1.68032	up		Seita.1G038300	0.00582604	1.6128	up
Seita.1G080600	0.00384284	4.35482	up		Seita.1G116900	0.03057	2.13222	up		Seita.1G080900	5.46314e-21	4.84659	up		Seita.1G041700	8.38305e-27	-4.0503	down		Seita.1G193300	0.0188391	-2.11077	down		Seita.1G060800	4.75828e-06	-1.9743	down		Seita.1G048200	0.0364177	1.15152	up		Seita.2G044900	3.85287e-07	-3.09737	down		Seita.1G060700	0.000462078	1.0915	up		Seita.1G039400	1.365e-26	-3.21995	down
Seita.1G081300	0.0193127	-1.8091	down		Seita.1G117000	0.0118874	-3.06084	down		Seita.1G081100	0.00754581	1.45595	up		Seita.1G045000	1.13826e-13	-1.58253	down		Seita.1G195000	7.57089e-06	-2.59869	down		Seita.1G061300	1.18392e-06	1.30524	up		Seita.1G049200	0.0103455	-1.04658	down		Seita.2G050800	2.70255e-06	-3.03007	down		Seita.1G060800	5.04571e-05	-1.77799	down		Seita.1G039700	2.28963e-05	-2.7688	down
Seita.1G086700	2.19208e-11	-6.24734	down		Seita.1G120000	0.0209883	-2.55632	down		Seita.1G084800	0.0277969	2.5939	up		Seita.1G045200	2.98606e-35	6.06763	up		Seita.1G195200	0.0108363	1.54679	up		Seita.1G062400	7.92989e-05	1.15578	up		Seita.1G052600	0.0308169	-1.29227	down		Seita.2G053800	3.44876e-07	7.55576	up		Seita.1G061800	6.58741e-05	-1.29648	down		Seita.1G040000	0.0044374	-1.28607	down
Seita.1G087500	0.00127845	-1.5429	down		Seita.1G121600	0.0399586	-2.31393	down		Seita.1G093200	0.000634486	-1.45849	down		Seita.1G046800	0.00374141	-1.19702	down		Seita.1G202200	0.0342243	-2.64854	down		Seita.1G062500	0.00024194	1.53966	up		Seita.1G053500	4.07745e-06	-2.45276	down		Seita.2G070100	0.00489761	-3.35098	down		Seita.1G062100	0.00253069	1.82107	up		Seita.1G040700	0.0156077	-1.37608	down
Seita.1G088600	0.0390098	1.42181	up		Seita.1G123600	1.87127e-09	-4.07202	down		Seita.1G095600	8.62531e-05	2.79509	up		Seita.1G046900	5.52817e-09	-1.29526	down		Seita.1G206800	6.10012e-09	-4.32825	down		Seita.1G063500	3.58976e-40	3.45128	up		Seita.1G054000	0.00457747	-1.35653	down		Seita.2G070300	0.0414789	-2.90982	down		Seita.1G063500	2.08657e-16	2.68622	up		Seita.1G040900	1.00771e-19	3.04512	up
Seita.1G091600	0.0154608	-1.73683	down		Seita.1G126500	0.0247992	1.96664	up		Seita.1G099500	2.26139e-06	-2.04215	down		Seita.1G050400	1.3745e-15	-1.73361	down		Seita.1G209000	2.83967e-06	2.45326	up		Seita.1G063600	3.70425e-07	1.27092	up		Seita.1G054700	4.84685e-05	-1.86195	down		Seita.2G078300	0.0113807	-8.09023	down		Seita.1G063600	0.00124961	1.15598	up		Seita.1G041000	2.84089e-05	-1.9986	down
Seita.1G091800	0.0294237	-1.5042	down		Seita.1G127700	0.0352321	-1.94025	down		Seita.1G099600	0.0131371	1.7495	up		Seita.1G051000	0.00391762	1.19205	up		Seita.1G210500	0.000208834	2.79891	up		Seita.1G064400	7.20337e-05	-4.16337	down		Seita.1G054800	1.91477e-07	-1.44922	down		Seita.2G081000	0.0322774	3.26831	up		Seita.1G064400	8.03567e-12	-2.82839	down		Seita.1G041300	0.000131943	1.06627	up
Seita.1G092400	0.0404336	-1.03055	down		Seita.1G133200	0.00666655	-2.08924	down		Seita.1G101000	0.0208391	-1.0047	down		Seita.1G052200	0.0485416	-1.15845	down		Seita.1G211800	0.0436898	2.06301	up		Seita.1G064700	1.37163e-11	-2.86038	down		Seita.1G056000	8.06394e-15	-1.70654	down		Seita.2G093200	0.0376656	2.28875	up		Seita.1G064700	7.27027e-12	-2.91551	down		Seita.1G041700	2.14128e-53	-4.53192	down
Seita.1G092500	3.74381e-05	-1.89046	down		Seita.1G135100	0.00939961	-1.87231	down		Seita.1G102500	0.0322228	1.0132	up		Seita.1G052600	1.76975e-06	-2.75078	down		Seita.1G216100	0.00438681	-2.0556	down		Seita.1G065200	0.000120005	-3.96275	down		Seita.1G057900	1.61535e-05	-1.20425	down		Seita.2G098100	0.0167845	-2.95292	down		Seita.1G065200	0.000836923	-3.21187	down		Seita.1G042000	1.51872e-06	3.13056	up
Seita.1G092900	0.00243112	-2.24335	down		Seita.1G136200	0.033007	1.74368	up		Seita.1G106800	0.00258046	-1.34063	down		Seita.1G053500	1.2441e-18	-5.38229	down		Seita.1G220400	0.0467214	2.58891	up		Seita.1G065300	5.00103e-20	-1.98106	down		Seita.1G059200	7.14469e-09	-1.81348	down		Seita.2G112100	0.00568084	-2.97709	down		Seita.1G065300	3.00384e-06	-1.17085	down		Seita.1G042300	1.1039e-05	2.7391	up
Seita.1G094200	3.52799e-12	-4.78486	down		Seita.1G141800	0.00137508	-3.80382	down		Seita.1G108500	1.93446e-10	-2.92079	down		Seita.1G053600	0.0182823	-3.28471	down		Seita.1G225000	5.9566e-06	2.45108	up		Seita.1G065400	6.50184e-08	-2.00242	down		Seita.1G059300	6.01455e-10	-1.99991	down		Seita.2G127000	0.0285371	-2.82981	down		Seita.1G065700	0.000389781	-1.05853	down		Seita.1G042400	0.000229747	-1.52253	down
Seita.1G095500	0.0111397	-2.01271	down		Seita.1G144700	3.42807e-05	-2.98299	down		Seita.1G108600	0.00974639	-1.92681	down		Seita.1G053800	9.4797e-16	-1.7319	down		Seita.1G228800	0.00487478	1.93329	up		Seita.1G065700	2.75547e-15	-1.80691	down		Seita.1G060400	0.0108317	1.45047	up		Seita.2G136500	0.0287528	3.02311	up		Seita.1G065800	2.46691e-05	1.45775	up		Seita.1G043900	0.00100852	-1.09167	down
Seita.1G097800	0.00615488	-1.30735	down		Seita.1G145200	0.000206778	-4.83808	down		Seita.1G111500	0.00013798	-2.23451	down		Seita.1G054000	0.000115127	-1.92011	down		Seita.1G239000	0.000370622	2.07693	up		Seita.1G065800	0.00139309	1.27729	up		Seita.1G060800	4.91366e-05	-1.46331	down		Seita.2G141500	7.21542e-10	6.12115	up		Seita.1G067400	0.0290567	1.08521	up		Seita.1G044800	5.03408e-05	1.35042	up
Seita.1G098800	8.93527e-06	-2.68611	down		Seita.1G165600	0.00842996	-2.15968	down		Seita.1G115800	1.08959e-05	3.45699	up		Seita.1G054700	5.56882e-05	-2.18	down		Seita.1G239300	1.433e-08	7.35598	up		Seita.1G066400	0.000347559	1.57529	up		Seita.1G061100	3.86139e-05	1.68374	up		Seita.2G142500	0.020254	4.00009	up		Seita.1G068700	0.002879	-1.40208	down		Seita.1G045200	7.63238e-15	8.69533	up
Seita.1G099600	0.00313248	1.45726	up		Seita.1G167700	0.0106703	-3.10288	down		Seita.1G116100	0.00739637	2.91212	up		Seita.1G054800	2.03676e-06	1.3229	up		Seita.1G241800	0.0248122	3.95386	up		Seita.1G067400	2.64885e-25	3.81713	up		Seita.1G063500	3.19352e-12	1.63101	up		Seita.2G154700	0.00922834	-3.13042	down		Seita.1G069700	7.18842e-08	-1.38877	down		Seita.1G046800	2.90318e-07	-2.5769	down
Seita.1G099700	0.00891437	2.35057	up		Seita.1G167800	0.00588453	-2.36687	down		Seita.1G117600	0.0105335	-1.27983	down		Seita.1G056000	5.02966e-09	-2.53875	down		Seita.1G242000	0.000334689	-2.53294	down		Seita.1G068500	3.56206e-07	-1.63299	down		Seita.1G063600	8.24535e-08	1.25042	up		Seita.2G170600	8.17272e-05	-2.89134	down		Seita.1G070200	0.0172038	1.22705	up		Seita.1G047100	0.00259175	-1.76832	down
Seita.1G101200	0.000404041	1.91237	up		Seita.1G169700	0.0155442	1.97036	up		Seita.1G118100	0.0322651	1.78927	up		Seita.1G056300	1.12746e-05	-2.45487	down		Seita.1G246200	0.0180435	-2.76444	down		Seita.1G068700	0.00125303	-1.96522	down		Seita.1G063900	6.91928e-23	-2.71499	down		Seita.2G192500	6.52025e-05	-2.48985	down		Seita.1G072900	1.46549e-08	3.77384	up		Seita.1G047500	0.0171775	1.03082	up
Seita.1G103600	3.48918e-05	-1.90274	down		Seita.1G170500	0.043482	3.00636	up		Seita.1G118400	0.0211422	1.06812	up		Seita.1G057100	6.2052e-07	1.01631	up		Seita.1G247100	0.0215775	-1.81939	down		Seita.1G068800	4.19407e-13	-1.6299	down		Seita.1G064000	1.27059e-15	-6.28027	down		Seita.2G193200	0.019449	2.12528	up		Seita.1G073000	4.91022e-11	-1.59752	down		Seita.1G048200	0.0391444	1.21101	up
Seita.1G103700	1.9232e-10	-3.2104	down		Seita.1G174900	0.0134557	-3.16922	down		Seita.1G120500	0.00397419	-2.34078	down		Seita.1G057900	2.11158e-09	-1.64738	down		Seita.1G250600	3.22712e-05	2.25388	up		Seita.1G069500	2.67184e-08	1.14509	up		Seita.1G064100	1.38121e-42	-3.11761	down		Seita.2G196700	0.00041045	2.48672	up		Seita.1G076900	3.95335e-17	4.02403	up		Seita.1G049200	0.0008053	-1.65695	down
Seita.1G104600	8.08418e-11	-8.81235	down		Seita.1G175200	0.0240738	-1.86831	down		Seita.1G123000	0.000728343	1.36662	up		Seita.1G058700	3.75861e-12	-1.61553	down		Seita.1G253700	6.50982e-14	6.10388	up		Seita.1G069700	2.85249e-06	-1.00567	down		Seita.1G064700	6.20618e-08	-2.51464	down		Seita.2G198100	0.0400979	3.79741	up		Seita.1G077200	0.000407067	1.85623	up		Seita.1G050400	1.71658e-07	-1.39762	down
Seita.1G104700	9.98861e-21	-5.62397	down		Seita.1G177500	0.00577504	-6.81455	down		Seita.1G123800	0.000907843	1.3829	up		Seita.1G059200	3.24064e-22	-4.49413	down		Seita.1G255500	0.000949821	-2.73286	down		Seita.1G073000	2.94316e-12	-1.43668	down		Seita.1G066900	2.65952e-08	-2.6083	down		Seita.2G200200	0.0173424	1.79263	up		Seita.1G078200	0.000481592	2.73673	up		Seita.1G051000	0.0252256	1.0279	up
Seita.1G104800	1.3572e-13	-5.39639	down		Seita.1G179500	1.63928e-05	-3.1687	down		Seita.1G125000	0.00976347	-1.77989	down		Seita.1G059300	2.09155e-36	-5.13773	down		Seita.1G256100	0.00698662	4.79969	up		Seita.1G076900	6.97017e-34	4.02152	up		Seita.1G067400	0.000187657	-1.17175	down		Seita.2G200800	0.00340646	2.3286	up		Seita.1G079000	0.013509	-2.92292	down		Seita.1G052200	0.0217748	-1.25909	down
Seita.1G104900	1.06848e-10	-5.68624	down		Seita.1G180000	0.0375487	1.58738	up		Seita.1G126200	0.0453692	-1.73221	down		Seita.1G060800	4.57964e-06	-1.87056	down		Seita.1G257200	0.0300981	2.7359	up		Seita.1G078200	1.86473e-20	5.89948	up		Seita.1G069500	1.03836e-17	1.92885	up		Seita.2G205400	0.0454078	-2.39778	down		Seita.1G080900	5.31869e-06	3.48587	up		Seita.1G052600	1.91553e-06	-2.69694	down
Seita.1G105300	7.3093e-09	-4.7707	down		Seita.1G180600	0.00716518	-2.21082	down		Seita.1G127100	0.0415733	1.67265	up		Seita.1G061300	7.97457e-05	1.0986	up		Seita.1G257300	0.0184417	2.01359	up		Seita.1G080900	0.000164956	3.08213	up		Seita.1G069600	5.82529e-07	-1.10821	down		Seita.2G216300	0.0235076	-3.77912	down		Seita.1G081100	8.20305e-05	1.66872	up		Seita.1G053500	0.00135995	-4.4349	down
Seita.1G105400	8.28371e-16	-6.77839	down		Seita.1G181200	0.031709	1.73306	up		Seita.1G127200	0.00202861	1.28634	up		Seita.1G062000	3.11948e-17	-Inf	down		Seita.1G259000	5.74022e-05	2.4681	up		Seita.1G081100	9.55543e-09	2.7327	up		Seita.1G069800	0.0197187	-1.13962	down		Seita.2G221900	0.000981364	-3.86665	down		Seita.1G084800	0.000127294	2.23818	up		Seita.1G053600	0.0256791	-2.14261	down
Seita.1G105500	3.74655e-20	-6.03417	down		Seita.1G181900	0.0474024	1.56233	up		Seita.1G127500	4.53284e-07	4.07386	up		Seita.1G062100	4.00187e-17	-1.69157	down		Seita.1G259900	0.000414527	3.21016	up		Seita.1G081300	0.0119972	1.50945	up		Seita.1G070400	2.44371e-08	1.46645	up		Seita.2G229900	0.0356095	3.19648	up		Seita.1G087100	0.00462155	1.48378	up		Seita.1G053800	0.00216701	-1.47021	down
Seita.1G105600	8.05414e-12	-9.73995	down		Seita.1G184500	0.00106228	-2.95624	down		Seita.1G127900	0.00374955	-1.35728	down		Seita.1G062400	1.45653e-08	-1.76053	down		Seita.1G265300	0.0289244	-2.14975	down		Seita.1G081400	4.59876e-10	1.28152	up		Seita.1G071600	3.60642e-06	-1.0532	down		Seita.2G241600	0.007818	1.87103	up		Seita.1G092800	0.00500438	1.65259	up		Seita.1G054400	0.000224889	1.17637	up
Seita.1G105800	7.02788e-14	-6.60643	down		Seita.1G185400	0.0461353	-2.29146	down		Seita.1G133000	0.0122851	2.05765	up		Seita.1G062600	0.000276037	1.65738	up		Seita.1G268200	0.0136134	3.38314	up		Seita.1G084700	2.46844e-05	2.14036	up		Seita.1G072400	0.0103188	-1.17821	down		Seita.2G241800	0.0175669	2.08764	up		Seita.1G093200	7.99952e-17	2.03714	up		Seita.1G054700	0.000126999	-1.96412	down
Seita.1G106500	0.0097833	-8.30622	down		Seita.1G186500	0.0323022	1.98217	up		Seita.1G134700	0.0024993	-1.47992	down		Seita.1G063500	2.87183e-42	3.07338	up		Seita.1G268300	0.0103919	-1.51807	down		Seita.1G084800	3.43707e-06	2.20277	up		Seita.1G075900	0.000438964	-1.11342	down		Seita.2G248900	0.0185312	-3.20731	down		Seita.1G093900	4.48995e-08	-1.40613	down		Seita.1G055200	0.000131531	-1.19465	down
Seita.1G107200	0.00166862	-1.54014	down		Seita.1G186600	0.0386323	-3.89189	down		Seita.1G135500	2.16865e-10	4.1845	up		Seita.1G063700	0.0150312	-1.41806	down		Seita.1G269900	0.049934	-2.34343	down		Seita.1G084900	0.00440998	-1.53703	down		Seita.1G076500	8.31224e-09	-1.29193	down		Seita.2G250200	0.000397299	-2.28847	down		Seita.1G096800	0.013083	-1.12745	down		Seita.1G055700	0.00336311	-1.25953	down
Seita.1G109900	0.0104845	-2.06576	down		Seita.1G190500	0.0214624	-2.99207	down		Seita.1G135700	0.000891641	3.46542	up		Seita.1G064100	3.58682e-17	-4.59714	down		Seita.1G270200	0.00432163	-4.47316	down		Seita.1G086900	0.0168576	-1.00354	down		Seita.1G077100	5.50291e-16	-1.86692	down		Seita.2G251700	0.00031279	-3.08394	down		Seita.1G096900	5.65781e-06	-1.22534	down		Seita.1G056000	2.38233e-05	-1.99144	down
Seita.1G112800	0.0160357	-1.7853	down		Seita.1G192100	0.0139613	1.77091	up		Seita.1G139000	0.0100257	2.1138	up		Seita.1G064700	1.77942e-08	-3.3015	down		Seita.1G272900	0.0280439	2.55576	up		Seita.1G089500	3.91743e-13	1.49321	up		Seita.1G078500	0.00690699	-1.37419	down		Seita.2G263800	2.02515e-06	-3.42505	down		Seita.1G097800	3.13931e-41	3.60993	up		Seita.1G056300	0.000348176	-1.90118	down
Seita.1G113300	0.0024938	-1.60772	down		Seita.1G193600	0.0230935	-3.81528	down		Seita.1G146900	0.00778361	2.17371	up		Seita.1G066900	2.43246e-05	-2.93532	down		Seita.1G275000	0.00432733	-4.34524	down		Seita.1G091700	8.88526e-09	1.18345	up		Seita.1G079000	0.000148542	-1.83923	down		Seita.2G268500	0.0391437	-1.78259	down		Seita.1G101000	3.55448e-06	-1.19159	down		Seita.1G057900	1.76492e-18	-2.39921	down
Seita.1G116400	0.0114923	-1.77702	down		Seita.1G195000	0.0282047	-2.40665	down		Seita.1G154200	0.000649104	3.23699	up		Seita.1G067400	1.43071e-28	-2.24985	down		Seita.1G276200	9.14397e-06	3.76537	up		Seita.1G092800	1.93216e-11	3.71273	up		Seita.1G080400	8.59808e-16	-2.42581	down		Seita.2G271700	0.0010422	3.9514	up		Seita.1G106900	1.70911e-05	-1.20098	down		Seita.1G058400	0.00141322	-1.86441	down
Seita.1G116700	0.0393423	-3.09013	down		Seita.1G196500	0.00280416	-2.36548	down		Seita.1G155200	0.0234179	2.39485	up		Seita.1G068500	1.4299e-07	1.76208	up		Seita.1G276400	0.000324081	3.77125	up		Seita.1G093200	1.53216e-25	5.26739	up		Seita.1G080600	1.01916e-49	7.02024	up		Seita.2G279000	2.34172e-07	-3.14413	down		Seita.1G108500	2.15354e-09	-2.25505	down		Seita.1G058500	0.00251614	-1.47108	down
Seita.1G118100	0.0341559	1.59813	up		Seita.1G200500	0.0462377	-1.53693	down		Seita.1G158400	0.000974823	2.27589	up		Seita.1G069500	4.1774e-29	2.2758	up		Seita.1G276500	0.00328517	2.99947	up		Seita.1G095600	0.000507977	2.31501	up		Seita.1G082100	0.00183305	-1.11929	down		Seita.2G284700	0.0187589	-2.84321	down		Seita.1G108600	3.56571e-12	-2.83801	down		Seita.1G059200	4.89845e-31	-4.03407	down
Seita.1G118500	0.0304985	-1.11191	down		Seita.1G202200	0.015297	-2.87619	down		Seita.1G159600	0.00123861	1.45142	up		Seita.1G069600	5.01052e-13	-1.49568	down		Seita.1G288500	0.00480756	1.75024	up		Seita.1G096800	8.92288e-05	-1.73466	down		Seita.1G082600	0.00453652	1.17362	up		Seita.2G287200	0.0235076	2.25426	up		Seita.1G109900	3.75625e-08	-1.79726	down		Seita.1G059300	8.64824e-36	-3.92196	down
Seita.1G119700	4.45075e-06	-2.65485	down		Seita.1G202300	0.0200049	1.77567	up		Seita.1G160000	0.000587347	1.44656	up		Seita.1G070400	1.09466e-19	2.27885	up		Seita.1G288800	0.0181537	1.48194	up		Seita.1G096900	9.8678e-17	-2.01717	down		Seita.1G085300	1.92434e-09	-2.50001	down		Seita.2G295100	0.00908443	-3.39968	down		Seita.1G111500	2.31627e-14	-1.93648	down		Seita.1G059600	0.0343417	-1.20438	down
Seita.1G123000	7.07227e-05	1.90996	up		Seita.1G203200	0.00389429	2.13965	up		Seita.1G166700	0.000271276	2.03844	up		Seita.1G071700	0.0110907	-1.35122	down		Seita.1G290100	0.0055523	-1.79219	down		Seita.1G097800	3.77974e-38	2.95929	up		Seita.1G085500	0.0429043	-1.09704	down		Seita.2G296300	0.0139653	-2.2093	down		Seita.1G112900	2.30308e-10	-1.70836	down		Seita.1G060000	0.000199883	1.01528	up
Seita.1G123400	6.79547e-08	-4.01031	down		Seita.1G203300	0.0170183	3.51768	up		Seita.1G167300	0.00682113	-1.34706	down		Seita.1G072700	2.85916e-11	-1.50195	down		Seita.1G290900	0.0359808	-2.20372	down		Seita.1G098900	0.0036236	-1.41257	down		Seita.1G085700	0.04831	-1.43595	down		Seita.2G304700	0.00111682	3.97658	up		Seita.1G113000	6.60376e-08	-2.06726	down		Seita.1G060800	3.68932e-06	-1.95345	down
Seita.1G123500	0.00492075	1.48614	up		Seita.1G206700	0.000732406	-2.53858	down		Seita.1G170500	0.000852804	2.61145	up		Seita.1G074200	0.0196582	-1.36345	down		Seita.1G291000	0.00387675	1.71919	up		Seita.1G099600	1.88e-14	1.56676	up		Seita.1G086700	5.64441e-07	-2.20906	down		Seita.2G305100	0.0184659	-3.38449	down		Seita.1G116600	1.37601e-07	-2.68158	down		Seita.1G061000	1.55138e-08	-2.28211	down
Seita.1G123600	0.00379014	-1.95959	down		Seita.1G206800	0.00670431	-2.67604	down		Seita.1G171800	1.17548e-12	6.51166	up		Seita.1G075800	1.3455e-06	-1.25739	down		Seita.1G291100	0.0419895	1.36348	up		Seita.1G106800	7.56349e-09	-1.39061	down		Seita.1G086900	1.70652e-05	-1.05352	down		Seita.2G311800	0.000551725	-3.31751	down		Seita.1G117500	0.0248375	1.10442	up		Seita.1G061100	0.0115645	1.28111	up
Seita.1G124300	0.00575877	1.77598	up		Seita.1G209900	0.0361062	-1.75754	down		Seita.1G171900	0.00131322	1.42138	up		Seita.1G075900	4.45196e-28	-6.46164	down		Seita.1G291600	0.0293757	-1.34267	down		Seita.1G108600	0.0484764	-1.77741	down		Seita.1G087500	4.01799e-09	-1.78057	down		Seita.2G320400	0.000207474	-2.37076	down		Seita.1G118300	5.25308e-06	-1.59352	down		Seita.1G061200	8.97812e-05	-1.06816	down
Seita.1G125000	0.0123207	-2.93753	down		Seita.1G210300	4.75566e-05	3.32588	up		Seita.1G172400	6.1989e-08	-2.18657	down		Seita.1G076500	2.83487e-20	-1.97693	down		Seita.1G292500	0.00144117	-2.99975	down		Seita.1G109500	2.33114e-06	-1.00673	down		Seita.1G089800	6.72248e-05	-2.1216	down		Seita.2G352700	0.000276406	-10.2552	down		Seita.1G118700	0.0138807	1.13096	up		Seita.1G062100	0.0044374	-1.18962	down
Seita.1G125500	0.00494306	1.86151	up		Seita.1G214900	0.0361062	1.7232	up		Seita.1G175300	0.0124569	-1.45744	down		Seita.1G077000	3.85651e-05	-2.06377	down		Seita.1G293100	0.0205819	-1.79498	down		Seita.1G109900	0.000234312	-1.34589	down		Seita.1G091600	3.27581e-08	-1.67138	down		Seita.2G363400	0.0175669	-1.70516	down		Seita.1G119300	0.0130061	1.44928	up		Seita.1G062400	0.0410236	-1.53864	down
Seita.1G126500	0.0167835	1.21216	up		Seita.1G220400	0.0132187	3.09562	up		Seita.1G180700	0.00244851	-1.9257	down		Seita.1G077100	2.00329e-20	-2.25276	down		Seita.1G293200	8.07128e-05	-2.1521	down		Seita.1G113000	5.85101e-05	-1.61152	down		Seita.1G091800	9.17976e-07	-1.18608	down		Seita.2G372500	0.00232314	-2.20932	down		Seita.1G119700	0.0111367	1.68283	up		Seita.1G063500	9.51542e-10	1.63197	up
Seita.1G127500	3.35441e-10	2.84342	up		Seita.1G226800	0.0318296	-1.74276	down		Seita.1G180900	0.00950026	-1.17219	down		Seita.1G077200	1.64178e-09	1.26989	up		Seita.1G294300	0.00177344	1.94673	up		Seita.1G117200	0.000508381	1.29089	up		Seita.1G094200	1.51241e-14	-2.64024	down		Seita.2G376500	0.0226051	-2.14204	down		Seita.1G123000	1.17357e-15	2.05196	up		Seita.1G063600	5.91651e-06	1.22708	up
Seita.1G127700	2.52262e-06	-2.66939	down		Seita.1G227000	0.018875	-1.7165	down		Seita.1G181200	0.019057	1.30018	up		Seita.1G078400	0.00162387	-1.82216	down		Seita.1G298100	0.0489761	1.2897	up		Seita.1G118600	4.96383e-05	-1.48435	down		Seita.1G094300	3.04411e-05	-2.51824	down		Seita.2G379900	0.041727	-3.77201	down		Seita.1G125000	7.94811e-09	-2.21735	down		Seita.1G063900	0.00115849	-2.98412	down
Seita.1G132500	9.99669e-06	-5.43517	down		Seita.1G230100	0.015639	-3.63412	down		Seita.1G182300	0.0110778	-2.11234	down		Seita.1G078500	2.76813e-05	-2.56426	down		Seita.1G298700	0.013798	-1.82569	down		Seita.1G119700	0.00923445	-1.39195	down		Seita.1G095100	0.00129	-1.10023	down		Seita.2G381600	1.43456e-05	2.93728	up		Seita.1G125500	1.8028e-05	5.08727	up		Seita.1G064000	0.00742614	-5.09285	down
Seita.1G134200	0.0475905	1.19459	up		Seita.1G230800	0.0183042	-2.21564	down		Seita.1G185200	0.0363695	-1.21147	down		Seita.1G078600	7.37991e-05	-2.26335	down		Seita.1G304600	0.00429151	-5.33926	down		Seita.1G121100	4.34216e-06	-1.04008	down		Seita.1G095500	2.75057e-06	-2.57009	down		Seita.2G382900	0.00830823	-2.70748	down		Seita.1G125900	4.37373e-11	-1.57711	down		Seita.1G064100	3.51634e-05	-2.90753	down
Seita.1G135500	0.00161152	1.76039	up		Seita.1G232500	0.0143785	-2.58559	down		Seita.1G186000	0.0037696	-2.00094	down		Seita.1G078700	0.000201691	2.15345	up		Seita.1G305000	0.0458393	-1.38419	down		Seita.1G122400	0.0038718	-1.23117	down		Seita.1G095700	7.66208e-07	-1.21245	down		Seita.2G394400	0.0177037	-2.55745	down		Seita.1G127100	0.00775877	1.47644	up		Seita.1G064700	6.5357e-08	-2.82758	down
Seita.1G136700	0.0158263	-3.23706	down		Seita.1G235000	0.000289719	-2.70871	down		Seita.1G186400	5.59994e-13	9.82363	up		Seita.1G079000	0.000798891	-1.86264	down		Seita.1G308900	0.00502868	2.94734	up		Seita.1G123000	3.8801e-32	2.53769	up		Seita.1G096800	0.000470659	-1.10598	down		Seita.2G395600	0.0236209	1.70324	up		Seita.1G130300	1.048e-06	-1.46001	down		Seita.1G065200	0.00448153	1.70174	up
Seita.1G137500	0.0296522	-2.38951	down		Seita.1G237600	0.0407404	6.30175	up		Seita.1G186500	0.0248029	1.10991	up		Seita.1G079500	6.32882e-08	-1.66917	down		Seita.1G311100	0.0109577	-2.08318	down		Seita.1G123300	1.37924e-07	1.25445	up		Seita.1G096900	0.000763956	-1.05024	down		Seita.2G396200	3.36564e-06	-5.60925	down		Seita.1G134400	0.000231385	-1.07426	down		Seita.1G066900	2.45214e-12	-3.5321	down
Seita.1G142800	0.00189477	2.34397	up		Seita.1G241300	0.00210424	-3.44727	down		Seita.1G187200	0.00527551	1.50846	up		Seita.1G080400	9.56021e-11	-2.68585	down		Seita.1G314800	0.0478181	-1.36774	down		Seita.1G123400	0.000589808	-2.40379	down		Seita.1G098100	0.00492751	1.4952	up		Seita.2G402800	0.000314785	2.43938	up		Seita.1G134700	7.36715e-14	-2.09332	down		Seita.1G067000	1.44337e-11	-1.80907	down
Seita.1G144700	3.32362e-17	-4.04647	down		Seita.1G241500	0.00959196	-1.98369	down		Seita.1G191300	0.0482784	1.71404	up		Seita.1G080600	3.27843e-105	8.73614	up		Seita.1G317100	0.0190965	-2.52796	down		Seita.1G123500	0.00064276	-1.83633	down		Seita.1G098300	0.0131637	-2.17285	down		Seita.2G404100	0.0121427	-1.74635	down		Seita.1G135100	2.39895e-05	-1.08803	down		Seita.1G067400	2.05739e-05	-1.78905	down
Seita.1G145200	3.86657e-05	-2.96151	down		Seita.1G241800	0.0067053	3.40489	up		Seita.1G193500	0.0468335	1.74189	up		Seita.1G080900	7.01028e-10	-1.29251	down		Seita.1G318200	0.0200587	1.66673	up		Seita.1G123800	5.99027e-07	1.21124	up		Seita.1G098500	0.0108212	1.24347	up		Seita.2G406100	0.0252551	-1.65187	down		Seita.1G135700	1.02944e-07	3.81769	up		Seita.1G068000	0.00699063	1.30076	up
Seita.1G146400	0.0493535	-1.04199	down		Seita.1G241900	0.000231922	-5.00226	down		Seita.1G197200	0.000853921	-2.20512	down		Seita.1G081100	2.04333e-11	-1.81079	down		Seita.1G319000	0.0010026	-3.27394	down		Seita.1G125000	1.62038e-12	-2.69391	down		Seita.1G098800	9.71912e-11	-1.94733	down		Seita.2G406500	0.0339091	2.93775	up		Seita.1G137500	6.99812e-11	3.67975	up		Seita.1G069500	7.48583e-12	1.98182	up
Seita.1G146500	0.0482189	1.0322	up		Seita.1G242000	0.0183506	-2.15843	down		Seita.1G198100	0.0462567	1.74669	up		Seita.1G081300	0.0132225	-1.74516	down		Seita.1G322700	0.0154906	1.49422	up		Seita.1G126200	4.0463e-07	-1.83855	down		Seita.1G099600	8.90536e-11	1.62929	up		Seita.2G410300	0.0309858	-2.15237	down		Seita.1G137700	0.000109436	1.04258	up		Seita.1G069600	1.93198e-06	-1.48507	down
Seita.1G148300	6.27615e-09	-3.64274	down		Seita.1G244200	0.000118308	4.91835	up		Seita.1G202300	0.000127678	2.6643	up		Seita.1G082100	0.000334576	-1.57507	down		Seita.1G323100	0.00898703	2.38811	up		Seita.1G127100	0.00136314	1.80011	up		Seita.1G100000	0.0180236	1.16953	up		Seita.2G411400	0.000832655	-2.25704	down		Seita.1G139100	0.000102063	-1.02664	down		Seita.1G069700	0.012741	1.00242	up
Seita.1G148900	0.00707894	1.58211	up		Seita.1G245500	0.00141865	-4.38663	down		Seita.1G203400	0.00716033	-1.95145	down		Seita.1G082600	4.77303e-06	1.73768	up		Seita.1G326600	0.0120858	2.80965	up		Seita.1G127200	2.7214e-11	1.36725	up		Seita.1G101200	1.43e-05	1.52176	up		Seita.2G412000	0.0012059	-2.2395	down		Seita.1G141800	0.0195095	-1.10964	down		Seita.1G069800	2.09037e-08	-2.59614	down
Seita.1G149200	0.0347113	-1.50922	down		Seita.1G246500	0.0260693	-2.21639	down		Seita.1G203800	0.014832	-1.87571	down		Seita.1G085300	5.14046e-14	-2.57708	down		Seita.1G327200	0.000708177	-3.14023	down		Seita.1G132400	0.000516775	2.06243	up		Seita.1G103600	4.21053e-06	-1.10662	down		Seita.2G415900	0.00730756	-1.99848	down		Seita.1G141900	6.95224e-07	1.31886	up		Seita.1G070400	2.12245e-14	2.48061	up
Seita.1G155200	1.01914e-05	2.17666	up		Seita.1G251300	6.86041e-07	7.03863	up		Seita.1G205400	8.3542e-05	3.16702	up		Seita.1G086700	3.21332e-16	-8.96097	down		Seita.1G331600	1.52896e-05	2.30439	up		Seita.1G133000	2.62757e-05	-2.5134	down		Seita.1G103700	2.59755e-34	-3.23158	down		Seita.2G431300	0.0239601	-3.2637	down		Seita.1G143800	6.80481e-06	-1.18119	down		Seita.1G071600	3.94467e-08	-1.51406	down
Seita.1G155300	2.50732e-08	-4.97277	down		Seita.1G252700	0.0451162	-1.67372	down		Seita.1G206500	0.00107221	-1.41663	down		Seita.1G086900	0.000166644	-2.1702	down		Seita.1G331800	0.0484055	-1.65577	down		Seita.1G133400	0.00466082	-1.46263	down		Seita.1G104600	3.75976e-57	-5.03905	down		Seita.2G437900	2.59167e-18	Inf	up		Seita.1G151900	0.0163748	1.53166	up		Seita.1G072400	3.75317e-07	-2.6394	down
Seita.1G157400	0.0439486	-1.71684	down		Seita.1G255400	0.0291742	-1.93196	down		Seita.1G206700	6.9909e-07	-2.07426	down		Seita.1G087500	1.23854e-19	-2.2471	down		Seita.1G334700	0.0362486	2.79055	up		Seita.1G134400	2.16565e-16	-2.1164	down		Seita.1G104700	3.94066e-20	-2.14064	down		Seita.3G001500	0.0300531	-1.72797	down		Seita.1G155100	0.000981099	-1.39036	down		Seita.1G075100	0.000649606	1.09289	up
Seita.1G158000	0.01978	1.85744	up		Seita.1G255500	0.0418145	-1.82667	down		Seita.1G208400	7.38603e-08	4.44725	up		Seita.1G088000	5.53552e-19	2.10492	up		Seita.1G335200	9.38699e-06	3.03894	up		Seita.1G134700	1.23075e-26	-2.66834	down		Seita.1G104800	7.16014e-25	-2.92304	down		Seita.3G002300	0.0425601	-2.35398	down		Seita.1G156200	5.23024e-08	1.55095	up		Seita.1G075900	1.40916e-22	-2.89967	down
Seita.1G159600	0.000409982	1.63281	up		Seita.1G255900	0.0110869	-2.71498	down		Seita.1G209000	0.00163489	1.78791	up		Seita.1G088600	0.00792857	1.20693	up		Seita.1G337500	0.00300535	-1.94284	down		Seita.1G135100	1.36281e-12	-1.48303	down		Seita.1G104900	1.4916e-18	-3.82753	down		Seita.3G012100	0.00141593	-5.7731	down		Seita.1G158700	9.56958e-07	1.51763	up		Seita.1G076100	6.8746e-05	-1.2409	down
Seita.1G160200	2.74928e-13	4.02935	up		Seita.1G256100	1.92116e-06	5.63288	up		Seita.1G210300	6.51942e-06	1.94755	up		Seita.1G089200	0.000753147	1.18871	up		Seita.1G338100	0.014777	-2.76703	down		Seita.1G135500	2.42386e-07	2.74261	up		Seita.1G105300	6.40672e-15	-3.03029	down		Seita.3G016000	0.00765001	-4.04797	down		Seita.1G165200	1.08712e-08	1.58836	up		Seita.1G076500	9.75985e-17	-2.301	down
Seita.1G161800	0.0429807	1.15901	up		Seita.1G256200	0.004156	-2.58825	down		Seita.1G210800	0.000236443	-1.73397	down		Seita.1G091600	2.07997e-06	-1.82054	down		Seita.1G342400	4.76101e-07	4.2634	up		Seita.1G136700	0.00359269	1.9911	up		Seita.1G105400	1.73815e-53	-3.90246	down		Seita.3G017400	0.0132973	1.92794	up		Seita.1G166700	0.0122339	1.21236	up		Seita.1G077000	0.0120503	-1.61204	down
Seita.1G162000	0.0417907	1.16152	up		Seita.1G256300	0.0359234	-3.60629	down		Seita.1G212200	3.57524e-05	1.68744	up		Seita.1G094200	8.62828e-15	-3.433	down		Seita.1G342900	5.53802e-07	-5.28893	down		Seita.1G137500	8.80621e-10	1.71661	up		Seita.1G105500	5.47091e-26	-2.60057	down		Seita.3G020400	0.00108067	-2.16513	down		Seita.1G170500	0.00336433	1.78697	up		Seita.1G077100	0.000546643	-3.09752	down
Seita.1G162700	1.1107e-05	-4.62384	down		Seita.1G259700	0.00349235	3.54554	up		Seita.1G214300	0.000343665	-1.66407	down		Seita.1G094300	0.0027933	2.86781	up		Seita.1G344600	0.0226237	1.36361	up		Seita.1G138200	0.00668097	1.59927	up		Seita.1G105600	1.73105e-131	-8.43859	down		Seita.3G021000	0.0169694	-2.00797	down		Seita.1G171900	0.00849709	-1.26925	down		Seita.1G077200	5.85783e-07	1.3364	up
Seita.1G162800	1.80121e-09	-5.1344	down		Seita.1G262000	0.0414705	-2.00775	down		Seita.1G215900	0.000473322	2.61932	up		Seita.1G094700	2.10823e-05	1.59736	up		Seita.1G345200	0.00467631	1.6018	up		Seita.1G141800	1.76196e-05	-1.81485	down		Seita.1G105700	1.07793e-06	-5.16881	down		Seita.3G024000	0.0420762	-1.64742	down		Seita.1G172400	3.54731e-21	-2.28106	down		Seita.1G078400	0.0268318	-1.36013	down
Seita.1G162900	0.00170296	2.4185	up		Seita.1G263400	9.4379e-05	-4.98503	down		Seita.1G217200	0.0290075	-1.2585	down		Seita.1G094900	3.29511e-07	1.146	up		Seita.1G346600	0.00384006	-2.11251	down		Seita.1G146900	0.00177333	1.79774	up		Seita.1G105800	1.2615e-33	-3.60124	down		Seita.3G043500	0.0222953	7.04842	up		Seita.1G172600	1.51698e-08	3.34161	up		Seita.1G078500	5.27818e-05	-2.12139	down
Seita.1G163000	1.28633e-05	-1.98977	down		Seita.1G266700	0.0162792	1.83459	up		Seita.1G217500	0.000167718	2.84764	up		Seita.1G095000	5.02966e-09	-1.32226	down		Seita.1G346700	0.00697178	2.65154	up		Seita.1G151900	0.000146883	2.98508	up		Seita.1G105900	5.3738e-15	-4.18238	down		Seita.3G055800	0.0297289	-1.6259	down		Seita.1G177800	3.08871e-05	-1.04806	down		Seita.1G078600	0.0134756	1.43947	up
Seita.1G164600	0.000412207	-2.08727	down		Seita.1G268000	5.42444e-07	4.20918	up		Seita.1G218500	0.00522561	2.16718	up		Seita.1G095100	0.000240618	-1.57741	down		Seita.1G347800	0.00045887	-2.24784	down		Seita.1G154200	0.0173354	1.04054	up		Seita.1G106200	0.000115044	-4.33436	down		Seita.3G063300	0.0352084	1.7979	up		Seita.1G178300	0.00174501	1.43109	up		Seita.1G080400	5.17681e-19	-2.59101	down
Seita.1G164900	1.34108e-05	-2.52059	down		Seita.1G268200	0.0107842	2.66064	up		Seita.1G218600	0.00209109	2.30278	up		Seita.1G095500	2.10576e-12	-2.00062	down		Seita.1G348600	3.99323e-06	2.8373	up		Seita.1G154500	1.98441e-11	3.30632	up		Seita.1G106500	4.60682e-17	-6.15771	down		Seita.3G067600	0.010373	-3.07997	down		Seita.1G179500	7.29791e-09	-3.8729	down		Seita.1G080600	1.68065e-32	6.127	up
Seita.1G165200	0.0248845	1.40933	up		Seita.1G271800	7.63082e-07	5.63951	up		Seita.1G218900	5.69784e-07	-1.96811	down		Seita.1G096500	1.91024e-13	-1.49418	down		Seita.1G350200	0.036403	1.33926	up		Seita.1G155200	0.00057358	1.83527	up		Seita.1G107100	9.86805e-05	-1.2976	down		Seita.3G068400	0.0345286	2.20696	up		Seita.1G182800	4.07494e-08	-1.86207	down		Seita.1G080900	0.0203686	1.56061	up
Seita.1G166000	0.0333923	-1.68267	down		Seita.1G272900	0.0163216	3.03183	up		Seita.1G220300	6.3964e-05	-3.3913	down		Seita.1G099400	0.0417201	1.1802	up		Seita.1G350600	0.0146493	-1.53326	down		Seita.1G156200	1.40181e-06	1.26314	up		Seita.1G107200	1.7346e-06	-1.12114	down		Seita.3G068800	5.20135e-05	-3.99172	down		Seita.1G185300	0.0261615	1.45921	up		Seita.1G081300	0.00542753	-1.48851	down
Seita.1G166500	0.00046334	-3.28869	down		Seita.1G275800	0.000232112	4.98269	up		Seita.1G220400	9.18514e-06	3.21587	up		Seita.1G099600	2.34082e-11	1.914	up		Seita.1G352100	2.37665e-05	-4.13499	down		Seita.1G156800	0.00110263	-1.36239	down		Seita.1G109900	8.30541e-15	-2.21784	down		Seita.3G072400	0.000832655	-2.95216	down		Seita.1G186000	0.00110035	-2.12282	down		Seita.1G082100	6.12595e-12	-2.58099	down
Seita.1G167200	0.00704344	-2.34902	down		Seita.1G276200	0.0195539	1.66146	up		Seita.1G222300	0.000215488	-3.06668	down		Seita.1G100400	0.00959222	1.48656	up		Seita.1G354100	3.75806e-05	-2.97839	down		Seita.1G158700	0.00909318	-1.43597	down		Seita.1G112800	0.0192221	-1.18288	down		Seita.3G073100	0.00938671	1.91336	up		Seita.1G186200	0.000677255	2.28654	up		Seita.1G083900	5.61772e-06	2.82839	up
Seita.1G167300	0.00990996	-1.69103	down		Seita.1G278000	0.00884445	-2.39636	down		Seita.1G225600	0.0357807	-2.14346	down		Seita.1G101200	1.23508e-20	2.28251	up		Seita.1G356800	0.0208831	3.71586	up		Seita.1G161800	3.33688e-12	1.42243	up		Seita.1G114300	0.0300191	-1.02867	down		Seita.3G075100	0.0437174	-1.58567	down		Seita.1G186400	2.37985e-46	10.4533	up		Seita.1G084900	5.81001e-05	-2.36003	down
Seita.1G167800	0.000697843	-2.3579	down		Seita.1G279800	0.00391453	2.20228	up		Seita.1G226800	0.00317451	-1.35984	down		Seita.1G102100	4.11256e-14	-1.53202	down		Seita.1G356900	0.0152319	-1.77973	down		Seita.1G162000	1.0991e-08	1.17255	up		Seita.1G116100	1.91837e-13	1.70067	up		Seita.3G075300	0.0373496	-1.96438	down		Seita.1G190500	0.00571792	-1.41919	down		Seita.1G085100	1.21287e-06	-3.14253	down
Seita.1G168700	0.014457	1.85526	up		Seita.1G282100	0.0488829	-2.41555	down		Seita.1G227000	2.26139e-06	-2.04264	down		Seita.1G103200	5.55111e-09	1.20213	up		Seita.1G357900	0.0238214	1.44103	up		Seita.1G162200	0.0459006	1.22364	up		Seita.1G116600	2.07547e-25	-4.38862	down		Seita.3G087000	0.00726473	4.66455	up		Seita.1G192000	0.0130958	1.23052	up		Seita.1G085300	9.24688e-10	-2.68429	down
Seita.1G168900	0.0015992	1.69388	up		Seita.1G282400	0.0291511	-3.8746	down		Seita.1G227300	0.0281932	-1.0372	down		Seita.1G103600	1.83108e-13	-1.84175	down		Seita.1G358100	0.014157	1.50495	up		Seita.1G162500	0.000180717	1.20063	up		Seita.1G116700	1.32075e-09	-1.3365	down		Seita.3G097400	0.0160414	-2.00621	down		Seita.1G192100	6.60872e-05	-1.13084	down		Seita.1G085400	0.0137145	-1.45324	down
Seita.1G169400	0.0163301	1.3838	up		Seita.1G286900	0.0462377	2.86181	up		Seita.1G227600	0.00391241	1.43381	up		Seita.1G103700	6.11225e-32	-3.57119	down		Seita.1G358800	0.035926	-1.32012	down		Seita.1G165200	7.46765e-14	1.83384	up		Seita.1G118600	1.05562e-05	1.03185	up		Seita.3G101300	3.02e-06	5.00745	up		Seita.1G193500	0.000140035	2.0326	up		Seita.1G085500	0.0201383	-1.34196	down
Seita.1G170200	1.87988e-07	-4.08559	down		Seita.1G287100	0.0442346	1.59261	up		Seita.1G228800	2.37164e-05	-1.80276	down		Seita.1G103800	5.90335e-22	-2.29247	down		Seita.1G360400	0.00170331	-2.79877	down		Seita.1G166700	0.00343518	1.17376	up		Seita.1G119300	0.000244753	1.65905	up		Seita.3G109900	9.44094e-09	-3.64011	down		Seita.1G194400	0.000789173	1.95694	up		Seita.1G085600	0.029602	-2.04465	down
Seita.1G170300	4.08072e-09	-4.89244	down		Seita.1G287200	0.000773334	2.6238	up		Seita.1G231000	0.00209048	2.18212	up		Seita.1G104600	1.58774e-27	-7.02188	down		Seita.1G362600	0.00479088	2.07205	up		Seita.1G168900	7.44422e-06	1.05045	up		Seita.1G119700	3.0622e-05	-1.52739	down		Seita.3G111700	0.0370849	2.1717	up		Seita.1G195000	0.000894857	-1.03483	down		Seita.1G085700	4.28851e-14	-4.21708	down
Seita.1G170700	0.000150017	-1.74418	down		Seita.1G288800	0.00691225	1.98964	up		Seita.1G232800	2.16066e-14	-3.11704	down		Seita.1G104700	4.11133e-49	-5.5644	down		Seita.1G363900	0.00449643	2.80299	up		Seita.1G170500	0.021914	1.34855	up		Seita.1G120800	1.25197e-08	2.26462	up		Seita.3G120900	0.039471	-3.8221	down		Seita.1G197200	0.00929681	-1.06331	down		Seita.1G086700	2.55059e-15	-3.96113	down
Seita.1G171000	0.0100495	-2.95682	down		Seita.1G290100	0.0474024	-1.60213	down		Seita.1G234400	0.0119562	-1.2239	down		Seita.1G104800	2.73062e-31	-4.87858	down		Seita.1G364800	0.00314208	-3.10249	down		Seita.1G171400	0.00049518	1.01688	up		Seita.1G122400	0.0373178	-1.37634	down		Seita.3G124200	0.000309339	-2.31864	down		Seita.1G197900	0.0082325	-1.18377	down		Seita.1G087500	9.51724e-20	-2.44887	down
Seita.1G174600	0.00274537	-1.89009	down		Seita.1G290200	0.00123899	-5.51853	down		Seita.1G236100	0.000537855	1.40602	up		Seita.1G104900	6.45276e-17	-5.47125	down		Seita.1G365200	0.000692468	2.24524	up		Seita.1G171800	8.79532e-10	4.05772	up		Seita.1G122900	0.0189798	1.07818	up		Seita.3G128000	0.00235158	-2.06224	down		Seita.1G202300	1.43956e-22	2.82123	up		Seita.1G088000	2.37817e-08	1.96003	up
Seita.1G175400	0.00108782	2.9052	up		Seita.1G291000	0.00209744	2.25531	up		Seita.1G239300	0.00129073	2.4513	up		Seita.1G105300	1.07866e-12	-4.57704	down		Seita.1G367900	0.0310583	-1.49458	down		Seita.1G171900	2.089e-05	1.95426	up		Seita.1G123000	1.27653e-19	2.04407	up		Seita.3G139000	5.93163e-07	3.23895	up		Seita.1G202600	3.33205e-05	1.2143	up		Seita.1G088800	0.00814708	1.19135	up
Seita.1G176900	0.00365242	1.71175	up		Seita.1G291400	0.011989	-1.99526	down		Seita.1G239600	3.57758e-09	2.68314	up		Seita.1G105400	2.91462e-67	-7.76849	down		Seita.1G376000	0.0284322	-1.62632	down		Seita.1G172400	7.12734e-26	-2.1435	down		Seita.1G123400	4.72396e-14	-3.26703	down		Seita.3G139200	0.017882	3.17321	up		Seita.1G203300	9.86193e-05	2.06614	up		Seita.1G089800	4.1744e-12	-4.25082	down
Seita.1G177600	7.58306e-06	2.21085	up		Seita.1G292500	0.0403224	-4.03918	down		Seita.1G241300	0.000893787	2.60641	up		Seita.1G105500	6.48519e-128	-5.65042	down		Seita.1G376200	0.00793726	-1.58486	down		Seita.1G172600	6.70116e-05	2.13753	up		Seita.1G124300	2.15189e-15	2.03749	up		Seita.3G140700	0.0324987	3.14809	up		Seita.1G203400	8.36428e-08	-1.33326	down		Seita.1G090500	5.65778e-05	-1.59891	down
Seita.1G178300	8.76868e-09	-4.85381	down		Seita.1G293200	0.0140559	-1.77943	down		Seita.1G241500	6.09597e-09	-2.31819	down		Seita.1G105600	0.00165686	-5.47599	down		Seita.1G376600	0.0228298	-4.46796	down		Seita.1G177400	1.61458e-06	-1.2924	down		Seita.1G125000	1.83811e-09	-1.36139	down		Seita.3G142400	0.00353978	2.33978	up		Seita.1G205200	0.000214088	1.91794	up		Seita.1G091600	2.86048e-20	-2.90123	down
Seita.1G180000	2.37595e-06	3.32981	up		Seita.1G293900	0.00134842	-3.66055	down		Seita.1G241800	3.51862e-12	Inf	up		Seita.1G105700	5.00333e-31	-Inf	down		Seita.1G379200	0.0241455	-3.65825	down		Seita.1G177700	0.000318047	1.87871	up		Seita.1G125200	1.04052e-07	1.35785	up		Seita.3G142500	0.0220391	-1.91307	down		Seita.1G207900	4.68178e-13	5.73266	up		Seita.1G091800	1.60483e-16	-2.43063	down
Seita.1G180500	0.00512183	-1.39086	down		Seita.1G295700	0.0138949	-5.08196	down		Seita.1G241900	4.609e-09	-5.34485	down		Seita.1G105800	1.05732e-27	-5.83486	down		Seita.1G380200	0.000846368	-3.66364	down		Seita.1G178300	1.43245e-05	1.72077	up		Seita.1G125500	0.0475759	1.21705	up		Seita.3G147500	0.0480306	1.53708	up		Seita.1G208100	5.19185e-14	-1.9871	down		Seita.1G092400	3.84112e-07	-1.40462	down
Seita.1G180900	0.00982883	1.89847	up		Seita.1G295900	0.000376414	-2.86943	down		Seita.1G242700	0.0130844	1.91598	up		Seita.1G105900	5.47071e-13	-4.87963	down		Seita.2G000700	0.000164611	3.49353	up		Seita.1G179500	1.2367e-07	-2.26527	down		Seita.1G126600	1.25519e-08	-3.33877	down		Seita.3G148700	0.0391867	3.68603	up		Seita.1G208500	7.18917e-14	-2.1933	down		Seita.1G092900	0.00547	-2.9602	down
Seita.1G181000	6.73297e-11	-8.06002	down		Seita.1G296200	0.0236338	2.15055	up		Seita.1G242800	0.000415235	1.51051	up		Seita.1G106200	1.47312e-08	-7.31978	down		Seita.2G002300	0.017947	-3.3648	down		Seita.1G182500	1.41525e-05	-2.36452	down		Seita.1G126700	8.93978e-06	-2.29572	down		Seita.3G157400	0.000214916	2.45426	up		Seita.1G209700	0.000404471	1.22756	up		Seita.1G094200	6.91372e-05	-1.74958	down
Seita.1G182800	7.47669e-05	2.00719	up		Seita.1G299400	0.00782011	-2.3614	down		Seita.1G243300	3.04567e-06	-2.83595	down		Seita.1G106400	0.000861323	-1.41406	down		Seita.2G003000	0.00243426	Inf	up		Seita.1G182800	3.14232e-05	-1.94062	down		Seita.1G126900	2.18498e-05	-1.86462	down		Seita.3G158500	0.0250304	-1.79357	down		Seita.1G210300	2.98109e-10	1.53155	up		Seita.1G094300	0.0221798	2.66863	up
Seita.1G183800	0.00602418	-2.08155	down		Seita.1G300500	0.00504611	-2.27691	down		Seita.1G243600	0.0141329	-1.90185	down		Seita.1G106500	1.36269e-31	-10.2746	down		Seita.2G021700	0.00599747	-2.39599	down		Seita.1G185200	2.19241e-10	-1.78573	down		Seita.1G127500	3.38722e-05	1.42616	up		Seita.3G160800	0.0139653	2.55491	up		Seita.1G210800	3.99217e-21	-2.85764	down		Seita.1G095000	0.000558904	-1.19023	down
Seita.1G184300	0.00688722	-4.55897	down		Seita.1G300600	0.00036689	-2.69482	down		Seita.1G245500	1.48708e-17	-3.42244	down		Seita.1G106800	0.00202174	-1.07712	down		Seita.2G023400	1.16303e-07	5.1297	up		Seita.1G186000	1.74988e-06	-2.5337	down		Seita.1G127700	0.00655064	-2.78784	down		Seita.3G164700	0.00186917	2.19475	up		Seita.1G211800	2.73551e-29	4.42525	up		Seita.1G095100	0.000448783	-1.38185	down
Seita.1G185900	0.00986097	-1.85568	down		Seita.1G304600	0.00250228	-3.4356	down		Seita.1G245800	0.00217887	-1.28513	down		Seita.1G107200	2.40417e-06	-1.01798	down		Seita.2G026400	0.00521128	-2.18733	down		Seita.1G186200	2.20662e-13	2.44703	up		Seita.1G127800	0.000554075	-1.07498	down		Seita.3G175700	0.00765001	2.96518	up		Seita.1G212000	0.00441308	1.22441	up		Seita.1G095500	9.22518e-21	-3.33307	down
Seita.1G186000	1.63507e-05	-2.51373	down		Seita.1G304800	0.00924777	-3.76076	down		Seita.1G250600	9.17923e-05	2.34056	up		Seita.1G110600	0.0351192	1.20236	up		Seita.2G031800	0.0078038	1.66855	up		Seita.1G186400	1.11145e-239	10.4868	up		Seita.1G131800	2.60943e-13	4.84135	up		Seita.3G177600	0.0227106	-1.70476	down		Seita.1G212200	5.15893e-08	2.05289	up		Seita.1G096500	0.00370541	-1.30634	down
Seita.1G187200	1.05435e-07	-2.89021	down		Seita.1G305000	0.00139666	-2.32511	down		Seita.1G251100	0.00623333	-1.2154	down		Seita.1G111600	5.60101e-07	-1.51313	down		Seita.2G032600	0.022172	1.41152	up		Seita.1G186500	4.60222e-23	2.0283	up		Seita.1G132500	0.00014446	-2.35176	down		Seita.3G180800	0.00105956	-2.27628	down		Seita.1G215600	0.00346342	-1.28459	down		Seita.1G097800	1.08557e-05	-1.18003	down
Seita.1G188700	0.00189086	-1.51213	down		Seita.1G306300	0.0223812	-1.74402	down		Seita.1G251800	0.00716716	-1.13977	down		Seita.1G112000	0.00210616	1.12579	up		Seita.2G038500	0.0129546	-4.19042	down		Seita.1G186900	0.00163111	1.38415	up		Seita.1G133100	0.0051406	-1.60175	down		Seita.3G182800	0.0211136	-1.83922	down		Seita.1G215900	0.00282683	1.5296	up		Seita.1G098100	0.0291479	-1.30204	down
Seita.1G192100	0.000122167	2.08413	up		Seita.1G307300	0.00387013	2.75517	up		Seita.1G253600	0.0267239	1.59818	up		Seita.1G112800	1.55493e-06	-2.52164	down		Seita.2G039400	0.0220863	-3.02849	down		Seita.1G188900	7.68772e-06	1.62065	up		Seita.1G134700	1.49952e-07	-1.90283	down		Seita.3G193800	0.0287528	5.12401	up		Seita.1G216200	0.000319101	-1.16417	down		Seita.1G098300	0.00315739	-3.33747	down
Seita.1G193200	1.92211e-11	-4.38445	down		Seita.1G310000	0.0021591	-3.59671	down		Seita.1G253700	1.52606e-07	5.89091	up		Seita.1G114400	0.012151	1.46761	up		Seita.2G044900	2.98804e-06	-2.78974	down		Seita.1G190500	0.000257412	-1.86577	down		Seita.1G134800	3.15597e-07	3.24795	up		Seita.3G209600	0.0472861	-1.81915	down		Seita.1G217200	7.17969e-05	-1.14773	down		Seita.1G098800	7.094e-05	-1.46348	down
Seita.1G194100	0.00761845	1.3017	up		Seita.1G314800	0.0317245	-1.69055	down		Seita.1G253900	0.0140767	-1.20124	down		Seita.1G115700	0.00196225	1.10264	up		Seita.2G046600	0.0104102	2.16621	up		Seita.1G191000	6.96459e-05	-1.67659	down		Seita.1G135200	0.0424758	-1.51956	down		Seita.3G209800	3.63408e-06	8.08954	up		Seita.1G217500	0.0166938	1.69019	up		Seita.1G099400	0.0032611	1.6991	up
Seita.1G196100	0.0307236	1.09034	up		Seita.1G316400	0.00844735	2.17843	up		Seita.1G255400	0.00237888	-1.6339	down		Seita.1G115800	0.0179208	1.02879	up		Seita.2G048100	0.0088712	-1.51909	down		Seita.1G193500	0.00053346	1.72847	up		Seita.1G135500	8.47238e-08	1.22732	up		Seita.3G218000	0.00117838	-3.20688	down		Seita.1G218100	1.52995e-05	-2.52425	down		Seita.1G099600	0.00547264	3.05003	up
Seita.1G196500	0.00303115	-2.2472	down		Seita.1G318200	0.0445442	1.77361	up		Seita.1G255900	0.0230312	-1.61994	down		Seita.1G116400	3.51344e-05	-1.15947	down		Seita.2G053800	1.53664e-10	Inf	up		Seita.1G195000	1.63612e-06	-2.18167	down		Seita.1G142800	0.00274584	1.60344	up		Seita.3G218800	0.0125034	1.89577	up		Seita.1G218900	2.19317e-31	-2.85883	down		Seita.1G100400	0.0420914	1.16601	up
Seita.1G196600	1.1747e-06	-2.84689	down		Seita.1G322200	0.00124075	-2.46876	down		Seita.1G256200	6.22782e-07	3.12831	up		Seita.1G116700	2.05355e-15	-2.73932	down		Seita.2G061700	0.000165104	-2.3504	down		Seita.1G195200	1.8811e-06	1.06301	up		Seita.1G144700	3.93093e-15	-1.93395	down		Seita.3G226700	0.000750551	-4.11671	down		Seita.1G220400	4.65795e-05	2.26424	up		Seita.1G101200	6.68538e-13	2.70383	up
Seita.1G197600	1.15077e-05	-2.21229	down		Seita.1G323700	0.00141865	-6.72211	down		Seita.1G257200	0.00229161	4.46919	up		Seita.1G117500	2.98979e-09	1.19463	up		Seita.2G071600	0.0216285	-3.25031	down		Seita.1G196500	0.0133766	-1.06663	down		Seita.1G145200	0.0054138	-1.8981	down		Seita.3G242000	0.0142813	-2.18623	down		Seita.1G221300	1.19896e-05	-1.09596	down		Seita.1G102000	0.0359502	-1.73485	down
Seita.1G201700	0.00200765	1.51267	up		Seita.1G324100	0.0273914	-2.44666	down		Seita.1G257800	0.0070101	-1.40495	down		Seita.1G118600	3.57276e-14	1.6713	up		Seita.2G076100	0.0456657	2.1751	up		Seita.1G197200	1.52664e-09	-2.57692	down		Seita.1G148000	1.05448e-05	-1.01944	down		Seita.3G244300	0.0400979	4.09657	up		Seita.1G222800	0.00280121	1.83741	up		Seita.1G102100	0.000200884	-1.59179	down
Seita.1G202300	0.0235811	1.81809	up		Seita.1G324300	0.0146726	2.60957	up		Seita.1G259500	0.00175706	-1.33821	down		Seita.1G118700	9.09556e-05	1.31664	up		Seita.2G077400	0.0497066	-1.25576	down		Seita.1G197500	8.3421e-07	-2.15471	down		Seita.1G148300	7.35148e-05	-1.85863	down		Seita.3G260100	0.00452848	-3.73301	down		Seita.1G225300	0.000315981	-4.21099	down		Seita.1G103200	2.20508e-05	1.18895	up
Seita.1G204200	0.00979703	-1.31635	down		Seita.1G324800	0.000884955	-3.25718	down		Seita.1G260100	1.72774e-05	Inf	up		Seita.1G119100	0.0175274	1.11991	up		Seita.2G078000	0.0331579	1.3722	up		Seita.1G197600	1.17255e-06	-2.07107	down		Seita.1G150700	0.0233818	-1.18758	down		Seita.3G263800	0.000673112	-5.05913	down		Seita.1G226800	6.1442e-07	-1.39609	down		Seita.1G103600	4.83876e-19	-2.41517	down
Seita.1G204900	0.000125201	-1.83079	down		Seita.1G326600	0.0123359	-2.96633	down		Seita.1G260600	0.00699138	-1.53912	down		Seita.1G119700	7.57934e-09	-2.8437	down		Seita.2G078100	0.0170075	-3.45499	down		Seita.1G197900	0.00602469	-1.31261	down		Seita.1G151700	0.0026212	-1.56374	down		Seita.3G264300	3.06939e-08	3.98762	up		Seita.1G227000	8.43722e-13	-1.98119	down		Seita.1G103700	2.99601e-10	-4.90652	down
Seita.1G205000	2.17015e-06	-2.77803	down		Seita.1G327100	0.00349724	-4.41262	down		Seita.1G263000	0.0139933	2.05827	up		Seita.1G122400	3.64057e-05	-1.31208	down		Seita.2G078300	0.0162035	-2.47775	down		Seita.1G198300	0.0133095	3.73268	up		Seita.1G154500	2.34843e-07	1.37826	up		Seita.3G271300	0.033866	-2.59413	down		Seita.1G227500	9.81319e-09	-1.46068	down		Seita.1G104600	1.53096e-55	-6.96211	down
Seita.1G205100	1.83567e-05	-3.29558	down		Seita.1G332000	0.0202589	-3.1405	down		Seita.1G264800	0.00210333	2.29864	up		Seita.1G122900	0.000766591	1.46883	up		Seita.2G092300	0.000575114	1.93974	up		Seita.1G198900	3.00487e-05	-1.84364	down		Seita.1G155200	4.19231e-15	2.16519	up		Seita.3G278400	0.00444796	-2.67301	down		Seita.1G228100	4.49642e-05	-1.08357	down		Seita.1G104700	3.38859e-66	-5.15594	down
Seita.1G206000	0.000927456	-1.58472	down		Seita.1G332400	0.0014256	-4.75547	down		Seita.1G265600	1.55717e-23	Inf	up		Seita.1G123000	6.34134e-26	2.24503	up		Seita.2G093200	0.000596862	2.26186	up		Seita.1G200500	4.96096e-18	-1.80562	down		Seita.1G155500	4.64242e-05	2.15857	up		Seita.3G283100	0.00683795	-2.1386	down		Seita.1G228800	8.17526e-08	-1.38797	down		Seita.1G104800	1.74094e-35	-4.45435	down
Seita.1G206700	8.33472e-05	-2.10613	down		Seita.1G332900	0.000104427	-4.86725	down		Seita.1G266300	0.000612205	-2.85182	down		Seita.1G123400	2.07902e-17	-6.2832	down		Seita.2G098100	0.00654808	-2.54846	down		Seita.1G201000	4.00599e-06	-1.00413	down		Seita.1G157600	2.1607e-16	-2.12457	down		Seita.3G293800	0.0205799	-1.65139	down		Seita.1G229000	3.42254e-09	-1.64393	down		Seita.1G104900	9.12411e-28	-5.60818	down
Seita.1G207000	0.0256895	-1.41889	down		Seita.1G333100	0.0253186	-5.79292	down		Seita.1G267200	1.43604e-07	3.84061	up		Seita.1G123500	0.0256298	1.00446	up		Seita.2G100300	2.1417e-10	-3.73585	down		Seita.1G201200	1.54643e-05	-2.03683	down		Seita.1G159600	5.21146e-10	1.41574	up		Seita.3G300200	0.0116533	-3.56532	down		Seita.1G230100	9.25845e-10	-1.92477	down		Seita.1G105300	5.84557e-19	-4.10983	down
Seita.1G208300	0.000292686	-2.88005	down		Seita.1G334900	0.013092	1.84315	up		Seita.1G267400	0.0117543	-1.3822	down		Seita.1G123600	0.00241612	-1.43873	down		Seita.2G106800	0.000130593	-3.23123	down		Seita.1G201400	1.50391e-08	2.01311	up		Seita.1G160200	1.83562e-35	5.90631	up		Seita.3G300700	0.0051619	-1.93449	down		Seita.1G230200	4.71845e-05	-1.0637	down		Seita.1G105400	3.50532e-50	-4.52182	down
Seita.1G208600	3.09012e-07	-3.58024	down		Seita.1G335400	0.0215745	1.75684	up		Seita.1G268000	0.0101115	1.2847	up		Seita.1G124300	2.25661e-35	2.53987	up		Seita.2G106900	0.0037617	-2.64979	down		Seita.1G201800	0.000653174	1.88067	up		Seita.1G161800	1.51854e-16	1.82935	up		Seita.3G306600	0.0101023	-1.84889	down		Seita.1G231000	0.000114944	1.01935	up		Seita.1G105500	1.59598e-33	-4.10276	down
Seita.1G208700	0.000676852	-3.19848	down		Seita.1G337500	0.00565708	-2.19833	down		Seita.1G268600	0.0228278	-1.25453	down		Seita.1G124900	0.01189	-1.96543	down		Seita.2G109800	0.0334856	1.31912	up		Seita.1G202200	8.25768e-11	-3.25682	down		Seita.1G162000	3.37801e-06	1.05137	up		Seita.3G314400	0.00977961	-2.09343	down		Seita.1G231800	2.0709e-09	1.80098	up		Seita.1G105600	1.95969e-23	-5.66343	down
Seita.1G209700	0.000402518	-1.8259	down		Seita.1G338900	0.0114586	3.3032	up		Seita.1G269900	0.000354741	2.92133	up		Seita.1G125200	7.58108e-21	2.39888	up		Seita.2G110800	0.00198432	-4.03257	down		Seita.1G202300	2.59928e-10	1.59767	up		Seita.1G162600	8.86619e-11	-3.28327	down		Seita.3G316000	8.12028e-05	5.14085	up		Seita.1G232300	0.00189211	-1.06963	down		Seita.1G105700	1.02346e-18	-7.74125	down
Seita.1G210300	0.014115	2.18583	up		Seita.1G340100	1.10249e-05	-6.07509	down		Seita.1G270200	0.0125242	-3.58545	down		Seita.1G125500	0.0060589	1.56375	up		Seita.2G115100	2.02291e-44	Inf	up		Seita.1G203000	3.67276e-06	1.09399	up		Seita.1G162700	1.40261e-14	-2.88417	down		Seita.3G316100	1.39347e-05	5.95735	up		Seita.1G237200	0.000290619	-1.07474	down		Seita.1G105800	2.04398e-46	-5.09194	down
Seita.1G211700	0.00643361	-1.41557	down		Seita.1G341000	0.0161909	-2.82966	down		Seita.1G272700	0.000411656	-1.92468	down		Seita.1G125700	1.85859e-08	-2.73432	down		Seita.2G115800	0.000310468	-4.04579	down		Seita.1G203300	0.000627423	1.54294	up		Seita.1G162800	4.50855e-08	-1.93973	down		Seita.3G320700	2.04525e-08	4.31732	up		Seita.1G239000	5.38024e-07	1.4332	up		Seita.1G105900	1.19079e-13	-4.35262	down
Seita.1G212000	0.0221715	-1.22673	down		Seita.1G341700	0.0324611	1.74656	up		Seita.1G272900	4.78266e-08	4.33995	up		Seita.1G127500	1.59458e-08	2.11326	up		Seita.2G115900	0.0325401	-3.52341	down		Seita.1G203400	9.68449e-06	-1.45711	down		Seita.1G162900	0.0236731	1.31551	up		Seita.3G332700	0.0279089	-1.89794	down		Seita.1G239300	0.000557565	2.01624	up		Seita.1G106500	2.68648e-40	-6.40358	down
Seita.1G212200	9.87735e-08	-2.68081	down		Seita.1G342900	0.000767787	-4.22999	down		Seita.1G273100	0.000734725	2.41485	up		Seita.1G127700	1.21416e-07	-3.75226	down		Seita.2G119000	0.00366427	3.31829	up		Seita.1G205400	0.025581	1.11749	up		Seita.1G163000	0.00501655	-1.40979	down		Seita.3G337900	0.0256309	-1.98725	down		Seita.1G239600	7.16158e-27	2.81519	up		Seita.1G107200	4.27469e-08	-1.45066	down
Seita.1G215300	0.000841838	2.17536	up		Seita.1G344900	0.0429974	-3.94635	down		Seita.1G273300	5.76433e-11	2.61159	up		Seita.1G130300	0.000666555	-1.09576	down		Seita.2G122700	5.52691e-05	-5.16561	down		Seita.1G206600	2.72852e-09	-1.24595	down		Seita.1G164900	0.000230108	-1.14641	down		Seita.3G346000	0.0133365	-1.89467	down		Seita.1G240800	2.59998e-06	-1.42157	down		Seita.1G112000	3.91705e-05	1.70064	up
Seita.1G216100	0.00161521	-2.22406	down		Seita.1G346700	0.00427345	2.15905	up		Seita.1G274600	0.0345062	-3.46951	down		Seita.1G132200	3.30433e-05	1.22974	up		Seita.2G124600	0.00976542	4.25361	up		Seita.1G207000	4.92977e-11	-2.18401	down		Seita.1G165200	9.88129e-07	2.03826	up		Seita.3G349500	0.0185312	-3.98346	down		Seita.1G240900	0.00405537	-1.17616	down		Seita.1G112800	0.00731666	-2.06285	down
Seita.1G217400	0.0250113	-4.8073	down		Seita.1G347800	0.0125937	-1.92605	down		Seita.1G275500	1.38571e-05	3.04787	up		Seita.1G132500	1.25922e-15	-4.64267	down		Seita.2G125300	0.00701397	1.60628	up		Seita.1G208500	1.7141e-24	-2.07759	down		Seita.1G166500	4.68501e-13	-1.71993	down		Seita.3G350800	0.00570179	-1.8948	down		Seita.1G241300	0.000171066	2.18972	up		Seita.1G113000	0.0148028	-1.00589	down
Seita.1G219200	0.0181655	-7.89717	down		Seita.1G349200	0.0287101	-1.72156	down		Seita.1G275700	0.0376236	3.48815	up		Seita.1G132700	6.47962e-06	1.17848	up		Seita.2G136700	0.0153736	Inf	up		Seita.1G208700	2.92996e-08	-2.32877	down		Seita.1G166600	0.00166189	-1.23782	down		Seita.3G353000	0.0268994	-2.4696	down		Seita.1G241500	1.93661e-14	-1.81495	down		Seita.1G113300	3.11742e-08	-1.75784	down
Seita.1G220300	0.00336007	-2.97942	down		Seita.1G349600	0.00124473	-2.3655	down		Seita.1G275800	0.00200938	2.55878	up		Seita.1G133900	0.00176337	1.53758	up		Seita.2G141500	4.38274e-11	5.90947	up		Seita.1G210300	1.16822e-19	1.88101	up		Seita.1G166800	0.0072767	-1.25172	down		Seita.3G355400	0.00891214	-1.9352	down		Seita.1G241900	0.00198939	-1.65958	down		Seita.1G114700	0.0354367	-1.35407	down
Seita.1G220400	6.50741e-05	2.13087	up		Seita.1G354100	0.0306239	-2.26672	down		Seita.1G276200	1.53142e-06	2.97062	up		Seita.1G134600	0.0321001	-1.14797	down		Seita.2G141900	0.0368659	-5.76954	down		Seita.1G210800	6.32504e-20	-2.19668	down		Seita.1G167300	0.00391143	-1.07672	down		Seita.3G357700	8.21168e-05	3.49157	up		Seita.1G242700	0.031665	1.40961	up		Seita.1G114900	0.00692602	-3.77092	down
Seita.1G221800	0.00241101	-1.45714	down		Seita.1G356800	0.00129233	4.50453	up		Seita.1G276500	0.000641447	3.68653	up		Seita.1G134700	9.73132e-11	-2.46944	down		Seita.2G142500	2.36682e-06	3.09514	up		Seita.1G210900	5.14605e-09	-5.03885	down		Seita.1G167600	3.96153e-34	-6.00145	down		Seita.3G364000	0.0185312	-1.81662	down		Seita.1G243300	0.00529813	1.48272	up		Seita.1G115700	1.04794e-07	-1.52872	down
Seita.1G223700	8.35779e-09	-3.39591	down		Seita.1G357900	0.00558322	2.15062	up		Seita.1G276600	0.0170709	-1.16323	down		Seita.1G134800	3.12142e-54	7.22741	up		Seita.2G144900	2.11238e-05	5.25785	up		Seita.1G211700	1.19894e-18	-1.79743	down		Seita.1G168900	5.99434e-09	1.33367	up		Seita.3G364800	0.0432669	-1.53535	down		Seita.1G243400	0.0077822	1.89	up		Seita.1G115800	5.74105e-07	-1.92181	down
Seita.1G224700	0.0240004	-1.34982	down		Seita.1G358600	0.0214803	1.89192	up		Seita.1G278000	0.0328091	-1.04681	down		Seita.1G135200	0.0019623	-1.95938	down		Seita.2G149300	0.00426681	-1.81202	down		Seita.1G214300	7.60352e-07	1.94245	up		Seita.1G169400	0.000220988	1.52936	up		Seita.3G371900	0.000136082	4.99984	up		Seita.1G243600	0.00216053	1.61424	up		Seita.1G116000	6.18804e-19	-3.0434	down
Seita.1G225600	0.00819618	-2.07494	down		Seita.1G358800	0.0188488	-1.70254	down		Seita.1G278500	1.72774e-05	-2.23379	down		Seita.1G135500	1.23541e-17	1.85086	up		Seita.2G156200	0.00463992	1.89223	up		Seita.1G215900	0.00683859	-1.3042	down		Seita.1G170200	0.00122874	-2.44363	down		Seita.3G373500	0.0265811	2.59256	up		Seita.1G243700	0.00142486	1.66185	up		Seita.1G116100	2.4491e-06	-1.25746	down
Seita.1G227000	3.37035e-05	-1.92464	down		Seita.1G358900	0.00776246	-2.30455	down		Seita.1G278900	1.01202e-07	-4.79605	down		Seita.1G136700	0.0024925	-1.7985	down		Seita.2G157800	0.0240313	-2.20487	down		Seita.1G216200	0.00182322	-1.01618	down		Seita.1G171800	0.00590894	1.03136	up		Seita.3G386300	0.00543584	-3.61221	down		Seita.1G244900	0.00493335	-2.49667	down		Seita.1G116500	0.00109062	-1.83877	down
Seita.1G228300	0.0350311	-1.15539	down		Seita.1G360400	0.00297139	-2.45145	down		Seita.1G279800	5.52873e-05	1.71699	up		Seita.1G137500	3.05129e-08	-1.40477	down		Seita.2G159000	0.00220634	2.10666	up		Seita.1G217500	1.30957e-09	1.27684	up		Seita.1G171900	2.82085e-60	-3.852	down		Seita.3G388700	0.0125034	-5.11741	down		Seita.1G245300	5.97126e-11	-1.6591	down		Seita.1G116700	1.73955e-10	-1.71138	down
Seita.1G228800	0.00152874	-1.56566	down		Seita.1G362000	0.011169	-3.53646	down		Seita.1G280600	0.00735893	-1.5813	down		Seita.1G137900	0.039503	-1.1929	down		Seita.2G164500	0.00105483	1.82884	up		Seita.1G218100	1.84413e-05	-2.20823	down		Seita.1G172500	4.27398e-11	-1.573	down		Seita.3G391200	0.00333333	-2.94698	down		Seita.1G245500	1.11961e-21	-2.49269	down		Seita.1G117000	0.000540409	-2.36213	down
Seita.1G230800	0.0346771	-1.05583	down		Seita.1G362600	0.00156928	2.25186	up		Seita.1G282300	0.0294969	-1.06694	down		Seita.1G138200	0.00963303	1.509	up		Seita.2G166600	0.0163828	-5.24035	down		Seita.1G218500	5.48851e-05	1.96452	up		Seita.1G174100	0.000110304	-1.55852	down		Seita.3G398000	0.0189055	-2.13859	down		Seita.1G245800	3.84439e-08	-1.39142	down		Seita.1G117300	0.000413901	1.37992	up
Seita.1G231400	0.0471992	1.10746	up		Seita.1G366100	0.0122424	-1.92154	down		Seita.1G287100	0.0347766	1.79945	up		Seita.1G138300	2.14198e-12	-1.43037	down		Seita.2G167900	0.0201364	-1.55323	down		Seita.1G218600	5.49673e-05	2.43189	up		Seita.1G174600	8.51583e-07	-1.48176	down		Seita.3G398700	0.0145033	-2.30345	down		Seita.1G247100	0.0111842	-1.34981	down		Seita.1G117500	1.01747e-05	1.61253	up
Seita.1G236000	5.15737e-05	-2.3929	down		Seita.1G369500	1.58331e-24	-Inf	down		Seita.1G289300	6.35716e-05	-1.80861	down		Seita.1G139400	1.46367e-15	-2.07183	down		Seita.2G168200	0.00301995	-2.46094	down		Seita.1G218900	5.14066e-48	-3.14892	down		Seita.1G175000	3.90426e-07	1.91507	up		Seita.4G007200	0.00279986	3.57942	up		Seita.1G250600	0.000673117	1.96903	up		Seita.1G117600	0.00181528	-1.02587	down
Seita.1G236400	5.66481e-05	2.22096	up		Seita.1G370400	0.0397944	-2.56486	down		Seita.1G289600	0.0351161	1.49304	up		Seita.1G141900	5.27124e-13	-1.49414	down		Seita.2G170100	2.94997e-05	-3.24222	down		Seita.1G220400	1.05611e-15	2.747	up		Seita.1G175100	0.000520588	-1.34124	down		Seita.4G007900	0.0330445	6.36265	up		Seita.1G251400	0.0349736	1.27739	up		Seita.1G118600	9.14739e-07	1.34584	up
Seita.1G237000	0.000887384	-2.45794	down		Seita.1G371900	0.0112473	-1.89776	down		Seita.1G289800	0.0028097	-1.54038	down		Seita.1G142800	4.90749e-06	2.49229	up		Seita.2G174800	0.00941335	-2.03821	down		Seita.1G224300	3.22817e-16	-3.14546	down		Seita.1G176900	2.78688e-20	3.8946	up		Seita.4G013500	0.0185312	-1.79318	down		Seita.1G251800	5.22104e-10	-1.59037	down		Seita.1G118700	0.012416	1.11599	up
Seita.1G237200	0.00801881	-2.04961	down		Seita.1G372500	0.00699584	2.43436	up		Seita.1G294300	1.82606e-05	2.14028	up		Seita.1G145200	2.96466e-05	-3.43263	down		Seita.2G177500	2.85211e-06	2.99547	up		Seita.1G225300	2.27015e-05	-1.59057	down		Seita.1G177600	1.28698e-20	2.07513	up		Seita.4G020700	0.0323113	2.34359	up		Seita.1G252000	0.000249798	1.87623	up		Seita.1G119700	0.00054827	-1.70889	down
Seita.1G237300	0.00132053	-1.55343	down		Seita.1G376200	0.039636	-1.54301	down		Seita.1G295900	0.0210089	-1.12492	down		Seita.1G147700	3.90978e-15	-1.60354	down		Seita.2G182000	0.0151872	-1.72696	down		Seita.1G226700	1.78492e-18	-1.82428	down		Seita.1G177700	1.6324e-11	-1.71928	down		Seita.4G025400	0.00930785	3.21	up		Seita.1G253100	0.00231401	-1.49104	down		Seita.1G119900	0.000126755	1.54613	up
Seita.1G238400	0.0161353	-1.2127	down		Seita.1G379200	0.00445049	-2.94974	down		Seita.1G296200	0.0332329	-1.13422	down		Seita.1G148000	5.51901e-10	-2.5025	down		Seita.2G183100	0.0280901	-2.56494	down		Seita.1G227000	1.68211e-13	-1.52149	down		Seita.1G177900	0.0201217	1.1955	up		Seita.4G029000	0.00292248	-4.27329	down		Seita.1G253700	8.65945e-59	7.27446	up		Seita.1G121100	0.00459268	-1.02409	down
Seita.1G239200	0.000367784	-2.51993	down		Seita.1G379700	0.039636	-2.53402	down		Seita.1G297600	0.00522561	3.11368	up		Seita.1G148300	8.5882e-14	-3.376	down		Seita.2G187700	0.0124418	-2.80035	down		Seita.1G227500	8.57653e-07	-1.03624	down		Seita.1G178400	5.65957e-05	-1.05051	down		Seita.4G029200	5.12298e-07	-3.74513	down		Seita.1G254000	0.0131737	1.44752	up		Seita.1G121600	9.13101e-08	-1.42263	down
Seita.1G239400	9.06845e-05	-2.13393	down		Seita.2G000600	0.00205459	10.0749	up		Seita.1G301000	0.0354425	-1.2034	down		Seita.1G149200	2.0066e-08	-1.54578	down		Seita.2G188400	0.00021485	-3.20975	down		Seita.1G228800	3.3648e-06	-1.18106	down		Seita.1G179500	1.36805e-27	-2.41988	down		Seita.4G035600	0.0329993	2.85114	up		Seita.1G255400	0.000761043	-1.30633	down		Seita.1G122400	5.88441e-08	-1.459	down
Seita.1G240400	0.000789535	-1.64021	down		Seita.2G000800	0.00776246	-2.95083	down		Seita.1G301300	2.87182e-09	3.28678	up		Seita.1G149300	0.0286379	-1.27434	down		Seita.2G193000	3.88242e-20	5.48268	up		Seita.1G229000	2.65165e-06	-1.2742	down		Seita.1G180000	0.000170061	1.73827	up		Seita.4G038000	0.0142405	3.18516	up		Seita.1G256000	7.17692e-08	-1.32191	down		Seita.1G122500	0.00016633	-2.21447	down
Seita.1G240600	1.72646e-05	-3.01251	down		Seita.2G001200	0.026343	-3.96899	down		Seita.1G301600	4.32857e-09	5.59834	up		Seita.1G150500	0.0237292	-1.56319	down		Seita.2G193200	0.00056206	1.99105	up		Seita.1G230100	0.0124397	-1.31705	down		Seita.1G180500	3.09493e-19	-2.02619	down		Seita.4G041800	0.0439633	-1.68572	down		Seita.1G256200	0.000407165	2.07057	up		Seita.1G122900	0.0229333	1.13859	up
Seita.1G241500	0.0154608	-1.21019	down		Seita.2G002000	0.0189842	-1.7585	down		Seita.1G301900	0.00031244	-2.852	down		Seita.1G151600	1.69474e-07	-2.12083	down		Seita.2G193300	0.00159191	-3.86535	down		Seita.1G230800	0.0174108	-1.24178	down		Seita.1G180600	9.99039e-06	-1.44885	down		Seita.4G042100	0.0160428	-2.11588	down		Seita.1G256400	0.0222782	1.85995	up		Seita.1G123000	6.70794e-25	2.77472	up
Seita.1G241900	0.00851418	-1.53163	down		Seita.2G005900	0.00622209	-2.2493	down		Seita.1G302500	0.0351921	-4.54651	down		Seita.1G151700	3.79558e-16	-4.09532	down		Seita.2G194200	0.00828984	-1.85237	down		Seita.1G231000	3.40245e-13	1.76481	up		Seita.1G180700	6.57924e-08	-2.10274	down		Seita.4G067800	0.00351164	-3.78625	down		Seita.1G256900	0.000192327	1.17525	up		Seita.1G123400	3.79601e-26	-4.48001	down
Seita.1G242300	0.00763223	-1.95031	down		Seita.2G014200	0.0273941	Inf	up		Seita.1G303300	9.95055e-06	-1.9287	down		Seita.1G153400	0.0112841	1.22052	up		Seita.2G196200	0.00479027	-1.93712	down		Seita.1G232600	7.41455e-13	-1.6056	down		Seita.1G180900	0.00417895	1.4362	up		Seita.4G068600	2.25749e-05	-2.96932	down		Seita.1G257200	1.26318e-06	2.60428	up		Seita.1G123500	0.0159092	1.2046	up
Seita.1G242700	0.000732881	1.75316	up		Seita.2G020700	0.0301402	-3.38763	down		Seita.1G303500	0.0351698	-1.20064	down		Seita.1G154200	7.80817e-10	-1.26344	down		Seita.2G197500	0.0285423	-6.89958	down		Seita.1G232700	5.24696e-08	-1.6944	down		Seita.1G181000	1.55923e-53	-7.0377	down		Seita.4G079400	0.0461733	-2.72448	down		Seita.1G257600	0.00261787	1.745	up		Seita.1G123600	0.00997961	-1.27847	down
Seita.1G244900	0.000255706	-2.87607	down		Seita.2G026400	0.000463968	-2.44727	down		Seita.1G303900	0.0179807	-1.60541	down		Seita.1G154500	4.01699e-05	1.17057	up		Seita.2G199600	0.0090138	4.31671	up		Seita.1G232800	6.6779e-70	-3.8308	down		Seita.1G181500	1.00556e-06	-2.54462	down		Seita.4G085500	0.000827455	-2.29487	down		Seita.1G257800	9.30633e-05	1.11864	up		Seita.1G123900	0.00259523	1.50148	up
Seita.1G245200	0.0237814	-1.94754	down		Seita.2G029300	6.07635e-05	-5.84043	down		Seita.1G306100	0.0011796	-1.62563	down		Seita.1G155100	0.0122597	2.33041	up		Seita.2G204400	0.0463837	-2.36866	down		Seita.1G233100	0.00415895	-1.60989	down		Seita.1G181900	0.000373475	-1.07902	down		Seita.4G093100	0.0357089	-2.97195	down		Seita.1G258300	0.00629553	1.35309	up		Seita.1G124300	5.09444e-18	2.81613	up
Seita.1G245500	3.07141e-05	-3.50134	down		Seita.2G030200	0.0153156	1.93247	up		Seita.1G307000	1.74395e-10	-5.5869	down		Seita.1G155200	6.48051e-33	3.51234	up		Seita.2G205400	0.000196232	-2.19109	down		Seita.1G233300	8.91176e-11	-1.58779	down		Seita.1G182500	0.01745	1.01828	up		Seita.4G095900	0.0227106	2.99483	up		Seita.1G259500	1.97412e-05	-1.07568	down		Seita.1G125000	2.0756e-13	-1.93583	down
Seita.1G245800	0.00240186	-1.54091	down		Seita.2G031200	0.0423157	-1.79523	down		Seita.1G308600	7.64185e-08	-2.24023	down		Seita.1G155300	7.64182e-39	-5.90221	down		Seita.2G206200	0.031706	2.06353	up		Seita.1G233400	1.80542e-23	-2.15216	down		Seita.1G182800	1.41701e-11	1.58587	up		Seita.4G099200	1.39347e-05	7.97772	up		Seita.1G260600	8.46629e-07	-1.26149	down		Seita.1G125200	1.30689e-20	2.88841	up
Seita.1G247000	3.72182e-05	-5.42531	down		Seita.2G033100	0.0207227	-2.41262	down		Seita.1G309200	0.016869	1.83047	up		Seita.1G155500	0.020938	1.35027	up		Seita.2G207800	0.0216285	-3.18122	down		Seita.1G237200	7.26698e-05	-1.17251	down		Seita.1G183800	0.00118607	-1.6131	down		Seita.4G101600	2.00558e-06	5.96044	up		Seita.1G264800	0.0039324	1.45447	up		Seita.1G125500	4.10735e-06	2.80369	up
Seita.1G248800	0.000552441	-2.67653	down		Seita.2G035900	0.0206419	1.7245	up		Seita.1G309600	4.18791e-09	4.20906	up		Seita.1G157600	0.00152233	-1.64896	down		Seita.2G209400	0.00435418	-3.20109	down		Seita.1G237300	0.00376317	-1.71141	down		Seita.1G184300	0.00239847	-2.89963	down		Seita.4G108300	5.30331e-08	3.59166	up		Seita.1G264900	9.71677e-13	1.77276	up		Seita.1G125700	2.02685e-06	-2.05546	down
Seita.1G251000	0.000105194	1.81539	up		Seita.2G038500	0.00343758	-5.18438	down		Seita.1G312600	0.0153794	2.43602	up		Seita.1G158800	3.74354e-05	1.47085	up		Seita.2G211000	0.0463837	-3.90929	down		Seita.1G238400	2.26939e-11	-1.54843	down		Seita.1G184500	0.00597126	-1.13888	down		Seita.4G108700	0.0373035	-1.82468	down		Seita.1G265400	1.08892e-11	-2.03585	down		Seita.1G126600	3.30746e-20	-6.96278	down
Seita.1G253500	0.0302673	-3.0483	down		Seita.2G038800	0.00478927	-2.68792	down		Seita.1G315200	4.79613e-06	7.90422	up		Seita.1G159600	7.69331e-16	1.80619	up		Seita.2G217500	2.89185e-05	2.41898	up		Seita.1G239000	1.20924e-22	2.26974	up		Seita.1G185100	1.6819e-06	-1.87111	down		Seita.4G108800	0.0472861	-2.83224	down		Seita.1G266000	0.00519938	-1.39417	down		Seita.1G126700	4.87866e-15	-4.55904	down
Seita.1G254000	7.39633e-06	-2.10851	down		Seita.2G041700	0.0026333	-3.60213	down		Seita.1G316900	0.00761565	2.21206	up		Seita.1G160200	2.42843e-07	3.58979	up		Seita.2G218500	9.91891e-09	4.18007	up		Seita.1G239600	5.41962e-48	4.09719	up		Seita.1G185300	0.000906312	1.6567	up		Seita.4G111400	0.0245491	2.23821	up		Seita.1G266300	9.44407e-09	-2.1751	down		Seita.1G127500	0.000200745	1.67674	up
Seita.1G254600	0.0261572	-1.63572	down		Seita.2G042700	0.00415497	-2.16332	down		Seita.1G318100	1.20736e-08	-5.98501	down		Seita.1G161800	7.98056e-16	1.66237	up		Seita.2G220400	0.0100897	2.87696	up		Seita.1G239800	1.52577e-17	1.75981	up		Seita.1G186500	2.43554e-13	1.6308	up		Seita.4G117000	0.0400979	-2.62019	down		Seita.1G267200	0.000171481	3.439	up		Seita.1G127700	7.40688e-05	-3.32977	down
Seita.1G256100	0.0367003	4.42918	up		Seita.2G042900	0.014166	1.87882	up		Seita.1G318400	0.000673282	-1.75087	down		Seita.1G162000	1.03544e-13	1.51319	up		Seita.2G226300	3.54003e-11	-4.54614	down		Seita.1G240800	1.9334e-08	-1.65114	down		Seita.1G187000	0.000463753	-1.37254	down		Seita.4G132600	6.40937e-06	-6.75013	down		Seita.1G267400	0.00642997	-1.40396	down		Seita.1G127800	0.00180698	-1.1309	down
Seita.1G256300	5.77999e-09	-2.74861	down		Seita.2G044400	0.00784439	-2.07367	down		Seita.1G321500	0.0166469	-1.12503	down		Seita.1G162600	9.40254e-12	-4.5813	down		Seita.2G227400	0.0429605	-1.90051	down		Seita.1G240900	1.43821e-05	-1.03011	down		Seita.1G187200	1.07328e-12	-1.86219	down		Seita.4G138700	0.0429598	1.60691	up		Seita.1G267900	3.70231e-06	1.27121	up		Seita.1G128700	0.0280373	1.11573	up
Seita.1G257600	0.00228502	-1.64005	down		Seita.2G044900	3.10887e-07	-3.5411	down		Seita.1G322300	0.00607304	2.62128	up		Seita.1G162700	3.26045e-27	-6.32149	down		Seita.2G228700	0.00055279	3.28754	up		Seita.1G241500	1.2119e-05	-1.44621	down		Seita.1G190900	1.22987e-05	-3.24723	down		Seita.4G139200	0.0465509	-4.333	down		Seita.1G268400	0.000191109	2.24169	up		Seita.1G130300	3.33288e-09	-1.83688	down
Seita.1G258300	0.000727392	1.7812	up		Seita.2G045100	0.00941984	-1.99491	down		Seita.1G322700	8.05752e-17	3.26851	up		Seita.1G162800	2.08143e-41	-8.7095	down		Seita.2G229900	0.00658093	4.26308	up		Seita.1G241800	1.1954e-06	6.48705	up		Seita.1G191700	0.00411363	1.16352	up		Seita.4G140300	2.00558e-06	6.07539	up		Seita.1G270000	0.0369654	-1.45519	down		Seita.1G131800	1.32436e-05	4.11579	up
Seita.1G258400	0.00789261	2.00413	up		Seita.2G045600	0.00992873	2.94171	up		Seita.1G323200	0.0331523	1.3895	up		Seita.1G162900	5.49516e-06	2.68143	up		Seita.2G231300	0.0327769	1.92197	up		Seita.1G242000	0.0257194	-1.25297	down		Seita.1G192100	1.01356e-07	1.93709	up		Seita.4G143700	0.0148298	7.55298	up		Seita.1G270200	5.30127e-07	-5.35577	down		Seita.1G132400	5.15414e-09	-3.81059	down
Seita.1G259900	7.55738e-05	-4.41328	down		Seita.2G047700	0.00017234	-3.9723	down		Seita.1G323700	0.0200959	-1.5196	down		Seita.1G163000	7.20604e-11	-1.36108	down		Seita.2G232100	0.0133497	-1.51976	down		Seita.1G242300	0.000944989	6.32127	up		Seita.1G193200	0.00637729	-1.65379	down		Seita.4G155100	0.046986	-3.97821	down		Seita.1G271100	6.05934e-07	-1.30135	down		Seita.1G132500	2.4599e-18	-3.87629	down
Seita.1G260600	0.0276901	1.20529	up		Seita.2G049800	3.43659e-06	-5.86273	down		Seita.1G324100	7.05848e-06	-3.85821	down		Seita.1G164600	1.2286e-06	-2.2699	down		Seita.2G232900	0.0331579	-3.68294	down		Seita.1G243900	0.00213633	-1.60229	down		Seita.1G193500	0.0141188	1.01864	up		Seita.4G159500	0.000296289	3.55583	up		Seita.1G272900	2.45146e-11	4.37763	up		Seita.1G134700	2.19809e-07	-2.17479	down
Seita.1G260700	2.15451e-05	-Inf	down		Seita.2G050000	0.00270403	-6.26734	down		Seita.1G324300	1.6323e-06	4.27559	up		Seita.1G164900	0.00131439	-1.06293	down		Seita.2G233100	0.03761	1.63906	up		Seita.1G245300	1.68684e-06	-1.01613	down		Seita.1G193600	1.59619e-07	-1.21913	down		Seita.4G171400	0.000557593	-4.08711	down		Seita.1G273300	0.0244452	1.46264	up		Seita.1G134800	8.81082e-13	3.76371	up
Seita.1G260800	3.38496e-05	-3.90999	down		Seita.2G050200	0.00124075	-5.68732	down		Seita.1G325600	0.00121158	2.60049	up		Seita.1G165200	2.02573e-06	2.06357	up		Seita.2G236200	0.0019617	3.35197	up		Seita.1G245500	1.18131e-33	-2.86265	down		Seita.1G194100	1.18912e-29	2.81465	up		Seita.4G180900	0.00938671	-3.12578	down		Seita.1G274600	1.45712e-07	-2.91737	down		Seita.1G135200	1.1614e-27	-3.07767	down
Seita.1G261400	0.00329362	2.23663	up		Seita.2G050800	6.14209e-06	-3.18937	down		Seita.1G330800	0.00168064	8.52965	up		Seita.1G166400	1.08125e-05	-1.27372	down		Seita.2G236900	0.0200587	1.85763	up		Seita.1G246700	0.00371232	1.39703	up		Seita.1G196100	5.15447e-07	1.16458	up		Seita.4G181200	0.0324103	-2.13956	down		Seita.1G275700	4.40126e-05	2.4269	up		Seita.1G135500	7.02641e-18	2.28896	up
Seita.1G262300	0.0234367	-2.16714	down		Seita.2G055300	0.00959196	2.33762	up		Seita.1G331500	0.00289185	-1.41662	down		Seita.1G166500	7.82527e-21	-2.19121	down		Seita.2G237700	0.00600547	-3.06767	down		Seita.1G247100	1.70926e-05	-1.96087	down		Seita.1G196500	0.00339489	-2.2437	down		Seita.4G181300	0.019171	4.0214	up		Seita.1G275800	0.000712756	2.05156	up		Seita.1G135700	5.5518e-05	1.2184	up
Seita.1G262500	0.00917284	-1.51238	down		Seita.2G058900	0.00445728	-2.47285	down		Seita.1G332100	0.00387377	-1.83286	down		Seita.1G166600	0.0113701	-1.23922	down		Seita.2G238800	6.61865e-05	4.54733	up		Seita.1G248300	5.86719e-05	1.80456	up		Seita.1G196600	0.005516	-1.03509	down		Seita.4G183800	0.0063928	-3.06949	down		Seita.1G276200	9.38388e-10	2.78166	up		Seita.1G136600	0.0208636	-1.57329	down
Seita.1G263000	0.000286926	4.11753	up		Seita.2G060800	0.0400292	-1.63873	down		Seita.1G335200	0.0205721	1.1892	up		Seita.1G166800	0.000188758	-2.05781	down		Seita.2G239200	0.00763515	-2.27714	down		Seita.1G249200	1.79769e-06	-1.01606	down		Seita.1G196900	0.011395	-1.16507	down		Seita.4G191500	0.0297874	-1.79492	down		Seita.1G279800	5.7768e-12	1.70158	up		Seita.1G137500	7.95818e-19	-2.40645	down
Seita.1G263200	0.0248547	-2.65131	down		Seita.2G061700	0.0236746	-1.96531	down		Seita.1G335400	0.00781835	1.40678	up		Seita.1G167800	0.000341069	-1.96162	down		Seita.2G241600	0.000824268	1.90681	up		Seita.1G250600	8.58899e-06	1.96936	up		Seita.1G197300	0.0271549	1.95189	up		Seita.4G192300	0.00939549	2.05765	up		Seita.1G280600	0.00484118	1.27623	up		Seita.1G138300	4.84698e-08	-1.71942	down
Seita.1G263400	0.00156355	-3.93851	down		Seita.2G070300	0.00700581	-2.37685	down		Seita.1G337500	8.03081e-08	-2.16179	down		Seita.1G168000	2.82605e-09	Inf	up		Seita.2G241800	0.00727454	2.09254	up		Seita.1G252000	8.88526e-09	1.23409	up		Seita.1G197500	6.68094e-32	-2.79064	down		Seita.4G195200	3.53086e-06	3.77267	up		Seita.1G282000	0.000555815	-1.61961	down		Seita.1G139400	1.57104e-13	-2.02198	down
Seita.1G264400	0.000217565	-2.22721	down		Seita.2G071600	0.0374854	-3.80623	down		Seita.1G339100	0.0191846	-1.71831	down		Seita.1G168100	0.00667783	-1.02988	down		Seita.2G243000	0.0198324	-2.68354	down		Seita.1G253100	7.61851e-07	-1.93316	down		Seita.1G197600	5.50788e-32	-2.71909	down		Seita.4G221700	0.00894591	1.83861	up		Seita.1G282300	5.86241e-12	-1.76989	down		Seita.1G141800	0.00509482	-1.05656	down
Seita.1G265100	2.7181e-05	-4.31627	down		Seita.2G078100	0.0119756	-1.86596	down		Seita.1G342400	0.00224996	1.39376	up		Seita.1G168900	4.72769e-09	1.25896	up		Seita.2G246500	0.0206469	-5.77499	down		Seita.1G253700	3.5974e-39	6.11632	up		Seita.1G198900	6.14082e-10	-2.76376	down		Seita.4G226600	0.00104161	-3.14463	down		Seita.1G283800	2.10978e-25	-2.60475	down		Seita.1G141900	0.00136461	-1.08192	down
Seita.1G265400	0.00240965	-3.46884	down		Seita.2G078300	1.93786e-06	-3.82019	down		Seita.1G343600	0.0181203	1.02691	up		Seita.1G169400	0.000191727	1.72536	up		Seita.2G249000	0.00654872	-2.26396	down		Seita.1G255400	0.00499377	-1.18676	down		Seita.1G199400	0.0193959	1.1752	up		Seita.4G233000	0.0010048	-3.84028	down		Seita.1G283900	0.0127945	1.47218	up		Seita.1G142800	1.73632e-06	2.98205	up
Seita.1G266100	0.00987126	-1.81377	down		Seita.2G079700	0.00956954	2.15134	up		Seita.1G346800	2.24468e-13	-Inf	down		Seita.1G169800	0.00336263	-2.00353	down		Seita.2G253600	5.63963e-08	-5.46993	down		Seita.1G256200	8.18105e-13	4.43851	up		Seita.1G201400	7.57686e-13	2.69762	up		Seita.4G234100	0.000147348	-3.14714	down		Seita.1G284300	0.0386113	-1.43527	down		Seita.1G143300	6.04071e-05	-1.09776	down
Seita.1G267000	3.36823e-05	-5.57915	down		Seita.2G080200	0.0165241	2.88739	up		Seita.1G347700	0.00857997	-1.59605	down		Seita.1G170200	0.00364902	-4.05214	down		Seita.2G254100	0.00487478	3.52474	up		Seita.1G257200	8.70623e-30	4.88487	up		Seita.1G201700	4.38354e-27	2.69012	up		Seita.4G239300	0.0437174	-1.82944	down		Seita.1G288100	2.40813e-07	1.41968	up		Seita.1G144700	1.61527e-05	-1.33714	down
Seita.1G267100	0.00343309	1.51903	up		Seita.2G081000	0.00209744	4.0074	up		Seita.1G352200	0.0149165	-1.21288	down		Seita.1G170500	0.0275199	-1.19954	down		Seita.2G255500	0.00793543	1.739	up		Seita.1G257600	5.03658e-05	2.66657	up		Seita.1G202200	4.28968e-07	-1.90288	down		Seita.4G258900	9.226e-06	2.7471	up		Seita.1G288600	0.0144937	-1.09087	down		Seita.1G145200	0.00130784	-2.79324	down
Seita.1G267400	0.00623142	-1.84623	down		Seita.2G081200	0.0327014	2.00905	up		Seita.1G353200	3.64808e-07	2.3392	up		Seita.1G170700	4.98286e-17	-2.5509	down		Seita.2G258900	0.00843861	2.79502	up		Seita.1G257800	1.96401e-06	1.60222	up		Seita.1G202300	7.99578e-52	3.51177	up		Seita.4G259700	1.11857e-06	-3.76306	down		Seita.1G289300	1.20513e-10	-1.6212	down		Seita.1G147700	2.64936e-10	-1.74449	down
Seita.1G268000	0.0083992	1.47205	up		Seita.2G088600	0.0284301	-2.80519	down		Seita.1G353500	1.9305e-05	1.73295	up		Seita.1G171900	2.44883e-05	-1.07406	down		Seita.2G259000	0.00275847	-3.34548	down		Seita.1G258300	2.0347e-07	1.67871	up		Seita.1G202700	0.00764861	1.43263	up		Seita.4G260400	0.000750551	-2.5161	down		Seita.1G289600	0.000197777	1.69491	up		Seita.1G148300	2.12883e-13	-3.33502	down
Seita.1G268900	3.13657e-05	-2.21327	down		Seita.2G090000	0.0499733	1.56054	up		Seita.1G353600	0.00778361	-1.46009	down		Seita.1G172500	2.48215e-08	-1.38846	down		Seita.2G260500	0.0019617	3.08304	up		Seita.1G260600	0.00123509	-1.18496	down		Seita.1G203300	1.75355e-07	-1.64077	down		Seita.4G263300	0.000971652	-2.17427	down		Seita.1G291000	4.35732e-07	1.3586	up		Seita.1G148900	0.0117156	1.31201	up
Seita.1G269900	1.25685e-05	3.31307	up		Seita.2G090200	0.000277586	2.60202	up		Seita.1G354100	0.0319457	-1.77013	down		Seita.1G175000	0.00591658	-1.43584	down		Seita.2G263800	2.20438e-06	-2.99464	down		Seita.1G262400	0.000842786	-1.79197	down		Seita.1G203700	4.71233e-05	-2.22469	down		Seita.4G267900	0.00681055	1.89027	up		Seita.1G292400	7.83504e-05	2.41978	up		Seita.1G149200	9.14408e-10	-1.64922	down
Seita.1G271500	0.000884416	1.58351	up		Seita.2G092300	0.0164135	1.7706	up		Seita.1G354600	0.000537993	2.65657	up		Seita.1G175100	0.0106495	-5.25626	down		Seita.2G271100	0.00792502	-2.85694	down		Seita.1G262500	1.73833e-07	-1.38404	down		Seita.1G204000	4.01893e-13	-1.60334	down		Seita.4G270600	0.036207	-1.62845	down		Seita.1G293100	0.0328086	-1.17651	down		Seita.1G150700	3.75265e-05	-1.99333	down
Seita.1G272200	1.66015e-10	-4.97053	down		Seita.2G092900	0.00255649	-2.3269	down		Seita.1G354800	0.0148319	-1.12715	down		Seita.1G175400	2.11924e-08	2.94918	up		Seita.2G282200	0.01328	1.74922	up		Seita.1G263000	9.9559e-08	3.38974	up		Seita.1G205000	9.99995e-07	-1.39796	down		Seita.5G011800	1.61921e-07	3.20208	up		Seita.1G293700	5.05334e-05	-1.90804	down		Seita.1G151700	0.00194656	-1.80793	down
Seita.1G272900	5.17684e-06	3.84616	up		Seita.2G093200	2.13286e-05	3.91598	up		Seita.1G356800	0.00566746	3.34692	up		Seita.1G176900	0.000176283	1.95056	up		Seita.2G284000	0.000863594	2.26718	up		Seita.1G263100	0.00136523	1.8648	up		Seita.1G208000	0.0482544	1.38351	up		Seita.5G012100	0.014712	1.8632	up		Seita.1G294300	0.00283947	1.35468	up		Seita.1G155100	0.00613286	1.46984	up
Seita.1G274100	0.000218931	1.76776	up		Seita.2G095500	0.00229374	5.29047	up		Seita.1G357900	0.0269054	1.01777	up		Seita.1G177600	1.59444e-30	2.44219	up		Seita.2G287100	0.00903788	-4.23808	down		Seita.1G263500	1.06236e-06	1.14211	up		Seita.1G208600	7.22274e-22	-4.37918	down		Seita.5G014300	0.021782	3.10269	up		Seita.1G296200	7.56179e-06	-1.1634	down		Seita.1G155200	3.53862e-10	2.42167	up
Seita.1G274500	0.000488863	-2.08076	down		Seita.2G096300	0.0139613	2.90574	up		Seita.1G358100	0.0180361	-1.56842	down		Seita.1G177700	5.22938e-39	-2.86648	down		Seita.2G290300	1.56968e-05	4.16435	up		Seita.1G264100	6.51476e-06	1.78937	up		Seita.1G208700	3.78944e-21	-3.37526	down		Seita.5G020500	0.00485541	1.9337	up		Seita.1G296300	0.00136864	-1.81436	down		Seita.1G155300	8.27997e-31	-3.33775	down
Seita.1G275000	0.00174599	-2.01542	down		Seita.2G098500	0.0270224	-2.80697	down		Seita.1G361200	0.0164942	2.08523	up		Seita.1G178300	0.000110269	-1.42125	down		Seita.2G291500	0.000111015	-4.45517	down		Seita.1G264900	1.01236e-19	1.93856	up		Seita.1G209700	1.11348e-08	-1.54387	down		Seita.5G026800	4.48918e-08	8.78718	up		Seita.1G297600	0.00108052	1.60885	up		Seita.1G155500	0.00018194	2.18776	up
Seita.1G275400	0.0139114	1.83975	up		Seita.2G100300	0.000581662	-3.01134	down		Seita.1G362000	0.000546779	-4.87612	down		Seita.1G178800	5.24322e-09	-1.46428	down		Seita.2G294500	0.0164861	-1.49753	down		Seita.1G265400	4.15056e-07	-1.71646	down		Seita.1G210300	7.87953e-27	2.39643	up		Seita.5G028400	0.00791195	-2.6758	down		Seita.1G300500	0.000450196	1.02092	up		Seita.1G156200	0.00375971	1.00684	up
Seita.1G276300	2.00748e-05	-2.90956	down		Seita.2G106900	0.00750588	-2.63464	down		Seita.1G362600	0.0392284	1.11539	up		Seita.1G179700	0.0164725	1.40211	up		Seita.2G295200	0.0163833	-2.69436	down		Seita.1G265600	2.12608e-38	Inf	up		Seita.1G211900	1.69522e-07	-3.18275	down		Seita.5G037900	0.00922834	-1.84898	down		Seita.1G301900	0.0356241	-1.10324	down		Seita.1G156700	6.77039e-15	2.05861	up
Seita.1G276400	0.0041176	-1.39069	down		Seita.2G108900	8.8703e-05	-6.35594	down		Seita.1G363800	8.0826e-05	-1.67398	down		Seita.1G180000	7.21261e-23	3.68612	up		Seita.2G296700	0.0260284	-2.55127	down		Seita.1G266000	9.32553e-07	-2.35846	down		Seita.1G212200	9.48328e-15	-2.20101	down		Seita.5G042600	1.47927e-06	7.48383	up		Seita.1G303100	0.00863989	-1.52221	down		Seita.1G157400	0.000175035	-2.7705	down
Seita.1G278900	5.74062e-05	-3.07228	down		Seita.2G111500	0.0117157	1.96256	up		Seita.1G364200	0.0263536	1.6071	up		Seita.1G180500	2.37248e-08	-1.17061	down		Seita.2G298000	0.0259846	-2.41624	down		Seita.1G266200	0.012222	-1.60692	down		Seita.1G212300	4.20549e-38	5.65995	up		Seita.5G042700	0.0205799	-3.3554	down		Seita.1G303300	1.20097e-10	-1.70601	down		Seita.1G158400	2.04084e-05	1.9443	up
Seita.1G279300	0.00801881	-1.84548	down		Seita.2G112100	0.016614	-2.8269	down		Seita.1G365200	0.0177242	-1.05912	down		Seita.1G180600	6.19196e-08	-1.81817	down		Seita.2G298700	0.0272522	-1.63868	down		Seita.1G266300	3.52483e-14	-2.90056	down		Seita.1G213900	2.84084e-08	-1.24193	down		Seita.5G048600	5.56866e-12	-Inf	down		Seita.1G303800	4.6207e-09	-1.48981	down		Seita.1G158700	1.63708e-21	5.15712	up
Seita.1G280500	0.0452391	-1.55689	down		Seita.2G115100	1.55285e-07	9.40984	up		Seita.1G366300	0.0196397	1.10447	up		Seita.1G180700	7.61187e-10	-2.07147	down		Seita.2G300600	0.0149373	-2.68183	down		Seita.1G267200	1.08794e-35	4.79063	up		Seita.1G215300	1.09533e-08	1.57202	up		Seita.5G050500	0.0400979	-2.12493	down		Seita.1G304700	4.65795e-05	-1.0355	down		Seita.1G159200	0.00663179	-1.11917	down
Seita.1G281400	5.01545e-08	-5.88637	down		Seita.2G115300	0.0148106	-2.86306	down		Seita.1G367700	8.02953e-07	3.4368	up		Seita.1G180900	1.91969e-05	2.33237	up		Seita.2G304700	7.21525e-18	7.07149	up		Seita.1G268000	0.00111315	1.1442	up		Seita.1G215600	3.37342e-12	-1.57771	down		Seita.5G053000	0.000584907	-3.14598	down		Seita.1G305900	0.0171986	-1.56555	down		Seita.1G159600	2.32971e-11	1.80875	up
Seita.1G282400	0.00156964	-4.59031	down		Seita.2G115900	0.0230383	-4.05578	down		Seita.1G368400	3.98389e-05	-1.61929	down		Seita.1G181000	3.3661e-07	-8.08404	down		Seita.2G309200	0.00403378	1.67334	up		Seita.1G268900	2.57521e-07	-1.35672	down		Seita.1G217400	8.72906e-69	-7.64949	down		Seita.5G075600	0.00232314	-2.10436	down		Seita.1G306100	2.02756e-08	-1.47472	down		Seita.1G160200	4.43744e-21	5.19499	up
Seita.1G284000	0.0256306	1.74152	up		Seita.2G122700	1.44758e-05	-5.16467	down		Seita.1G371900	0.0217692	-1.6366	down		Seita.1G181200	1.84442e-12	1.44958	up		Seita.2G310900	0.00307796	-1.69317	down		Seita.1G270000	3.77382e-05	-2.12623	down		Seita.1G217800	0.00148023	-1.79568	down		Seita.5G079300	0.00939549	-2.62262	down		Seita.1G306500	0.0430235	1.2357	up		Seita.1G161800	9.79566e-06	1.21629	up
Seita.1G284100	8.28646e-08	-2.70146	down		Seita.2G125300	0.0256349	1.67477	up		Seita.1G373600	4.48583e-08	4.85799	up		Seita.1G181900	2.10555e-05	-1.34763	down		Seita.2G319800	3.29e-05	2.37393	up		Seita.1G270200	0.0401468	-3.87445	down		Seita.1G217900	4.25611e-08	-1.34239	down		Seita.5G081100	0.00116578	-2.65221	down		Seita.1G307900	3.47994e-05	-1.20061	down		Seita.1G162000	0.000146232	1.0801	up
Seita.1G284600	0.000224285	-2.81929	down		Seita.2G127000	0.0223294	-5.03665	down		Seita.1G373700	0.0141046	2.02808	up		Seita.1G182300	5.68939e-16	-2.26494	down		Seita.2G323800	1.18944e-11	3.72089	up		Seita.1G270500	0.00184532	-1.81874	down		Seita.1G219200	1.14469e-10	-5.88428	down		Seita.5G092200	0.0120516	-3.92899	down		Seita.1G308600	5.43133e-06	-2.2379	down		Seita.1G162200	0.0478531	1.29995	up
Seita.1G286300	0.0102166	-1.92297	down		Seita.2G129500	0.02835	-2.31666	down		Seita.1G376700	0.000207591	-1.56674	down		Seita.1G182500	5.66717e-11	2.09058	up		Seita.2G324900	7.43154e-06	-2.40156	down		Seita.1G271500	7.60335e-21	4.3251	up		Seita.1G219700	0.00195762	-2.02166	down		Seita.5G092400	0.00333333	3.05466	up		Seita.1G308900	0.00437241	1.1464	up		Seita.1G162600	3.16136e-12	-3.84932	down
Seita.1G286400	0.00890932	-1.62163	down		Seita.2G136700	1.99157e-05	Inf	up		Seita.1G377800	0.0238448	1.55303	up		Seita.1G182800	6.41295e-55	3.41038	up		Seita.2G325000	8.00904e-06	-4.57699	down		Seita.1G272700	5.40501e-07	1.88837	up		Seita.1G220400	1.43978e-15	2.63591	up		Seita.5G092900	0.00543093	5.11849	up		Seita.1G309600	3.64134e-05	4.63496	up		Seita.1G162700	2.96721e-25	-3.89256	down
Seita.1G287200	0.0014435	1.50015	up		Seita.2G141100	0.0125749	2.28202	up		Seita.1G378000	0.0102233	2.02006	up		Seita.1G184300	4.86935e-14	-3.11668	down		Seita.2G325100	0.0141482	1.70755	up		Seita.1G272900	1.31509e-15	4.64965	up		Seita.1G221400	4.81503e-09	-1.33525	down		Seita.5G093000	1.18287e-11	5.25992	up		Seita.1G313700	0.00210132	1.83443	up		Seita.1G162800	5.60477e-33	-3.82251	down
Seita.1G288000	0.0135423	-1.38427	down		Seita.2G141500	4.65331e-09	6.66898	up		Seita.1G378100	0.0346596	-1.02934	down		Seita.1G184500	9.18261e-10	-2.36166	down		Seita.2G330800	7.93635e-05	2.94887	up		Seita.1G273300	3.82979e-08	1.44976	up		Seita.1G221600	1.93515e-18	-3.97851	down		Seita.5G105200	0.0439633	-1.58651	down		Seita.1G313800	0.00390985	-1.06204	down		Seita.1G163000	2.85186e-15	-2.09919	down
Seita.1G289500	0.0317838	-1.12092	down		Seita.2G142200	0.00842996	-1.93525	down		Seita.1G380000	0.000362813	4.89793	up		Seita.1G185000	9.06317e-05	1.89095	up		Seita.2G335600	0.039693	2.59653	up		Seita.1G274100	0.0293701	-3.20297	down		Seita.1G221800	4.44382e-12	-1.53591	down		Seita.5G110600	0.0169694	4.83347	up		Seita.1G314700	0.0428779	1.21334	up		Seita.1G164900	3.10013e-12	-2.2448	down
Seita.1G290200	6.35945e-09	-4.35622	down		Seita.2G142500	0.00201335	4.81465	up		Seita.1G380300	0.00924041	-1.18222	down		Seita.1G185100	1.02131e-40	-2.97657	down		Seita.2G335900	0.0027118	-2.27853	down		Seita.1G274600	1.94787e-06	-2.89346	down		Seita.1G221900	0.00691954	1.41545	up		Seita.5G112900	0.0169694	-2.66071	down		Seita.1G315200	4.11082e-29	6.1728	up		Seita.1G165200	7.8078e-05	2.05477	up
Seita.1G290900	0.00165692	-2.0023	down		Seita.2G143900	0.0326152	1.59356	up		Seita.2G001400	0.000162357	2.07152	up		Seita.1G185300	0.000397071	1.86956	up		Seita.2G336300	0.000102251	-3.03413	down		Seita.1G275500	0.000107495	1.85965	up		Seita.1G223700	4.51439e-51	-5.02381	down		Seita.5G113700	4.8804e-13	4.65435	up		Seita.1G315800	0.00176367	1.06297	up		Seita.1G165800	0.00317323	-1.14944	down
Seita.1G292500	9.14677e-05	-1.77661	down		Seita.2G149000	0.0356385	1.69601	up		Seita.2G002300	0.0346441	-1.76466	down		Seita.1G186200	3.55821e-53	-3.22044	down		Seita.2G337900	3.96042e-05	-2.7964	down		Seita.1G275700	0.0475518	1.07058	up		Seita.1G224700	3.27825e-06	-1.13051	down		Seita.5G119800	0.0496083	5.37112	up		Seita.1G316900	0.0383657	1.03976	up		Seita.1G166400	2.45919e-05	-1.30985	down
Seita.1G294600	0.0166554	-1.46416	down		Seita.2G154700	3.40136e-06	-3.31776	down		Seita.2G002600	0.00954951	1.16799	up		Seita.1G186400	5.85932e-08	-2.69408	down		Seita.2G338900	0.000488466	-3.36673	down		Seita.1G276200	1.81466e-22	3.76818	up		Seita.1G225000	7.41647e-05	1.83307	up		Seita.5G125500	0.00652007	-2.20344	down		Seita.1G317800	6.55512e-06	-1.12569	down		Seita.1G166500	6.68185e-19	-2.50837	down
Seita.1G295300	0.0458327	1.08638	up		Seita.2G158000	0.0238504	-2.14479	down		Seita.2G003000	5.54029e-08	Inf	up		Seita.1G186500	1.69285e-23	2.04341	up		Seita.2G340700	0.0161863	2.67261	up		Seita.1G277500	0.00506427	-1.51447	down		Seita.1G225300	9.79145e-05	-1.02241	down		Seita.5G126500	0.0465509	-2.25419	down		Seita.1G318100	7.23801e-09	-5.69533	down		Seita.1G166600	3.64911e-05	-1.98162	down
Seita.1G295700	1.06679e-15	-5.01401	down		Seita.2G158200	0.00307945	-3.34073	down		Seita.2G003500	0.000642818	-2.26016	down		Seita.1G186900	0.00740591	1.14269	up		Seita.2G341500	0.0217659	-2.58713	down		Seita.1G277600	5.67787e-07	1.1227	up		Seita.1G227000	1.00881e-12	-1.66914	down		Seita.5G134500	0.0413459	1.75491	up		Seita.1G318400	1.62904e-12	-1.90746	down		Seita.1G166800	1.49593e-07	-2.60766	down
Seita.1G297000	0.0151794	-1.18318	down		Seita.2G159600	4.21559e-05	7.2411	up		Seita.2G014200	0.00852117	1.79328	up		Seita.1G187000	4.99433e-06	-2.36383	down		Seita.2G342300	0.000152833	-4.11859	down		Seita.1G278100	0.000152934	-2.13638	down		Seita.1G228800	0.000695188	1.01673	up		Seita.5G146500	0.000161081	-2.47653	down		Seita.1G318800	2.21631e-06	1.29497	up		Seita.1G167200	0.000506538	-2.107	down
Seita.1G298000	0.00519922	-1.7693	down		Seita.2G160700	0.00939961	2.92468	up		Seita.2G015900	5.21658e-07	-4.12025	down		Seita.1G187200	3.48858e-23	-2.1981	down		Seita.2G348600	0.0206534	2.49634	up		Seita.1G279800	0.000343812	1.07724	up		Seita.1G230000	5.30384e-33	-4.77903	down		Seita.5G147900	0.0494251	1.55331	up		Seita.1G319200	1.68702e-07	2.04527	up		Seita.1G167300	1.7997e-06	-1.42463	down
Seita.1G299200	5.29251e-06	-5.26407	down		Seita.2G161000	0.00685389	5.94452	up		Seita.2G024600	0.000202174	2.1221	up		Seita.1G188700	2.08966e-10	-1.78054	down		Seita.2G349000	0.000435133	-4.0455	down		Seita.1G282300	0.000142304	-1.17102	down		Seita.1G230700	0.000657942	1.34614	up		Seita.5G153500	0.0100797	-3.49181	down		Seita.1G321000	1.88834e-06	-1.21866	down		Seita.1G167400	4.78281e-13	-2.14863	down
Seita.1G300600	0.00235507	-1.58427	down		Seita.2G163800	0.016614	-2.6956	down		Seita.2G025600	0.0227489	-1.42415	down		Seita.1G190500	2.80013e-05	-1.26684	down		Seita.2G352200	0.0136125	2.41605	up		Seita.1G283000	1.21416e-06	-2.9613	down		Seita.1G233400	0.000512144	1.6139	up		Seita.5G154300	0.0296908	-1.68038	down		Seita.1G321900	1.01799e-05	-1.1198	down		Seita.1G167800	0.00720756	-2.7216	down
Seita.1G301000	0.0147164	-1.76633	down		Seita.2G165600	0.0195419	-2.54149	down		Seita.2G025800	0.000404256	-1.61597	down		Seita.1G190600	0.00114297	-1.19695	down		Seita.2G352600	0.0113484	4.01042	up		Seita.1G283300	1.56601e-07	4.11974	up		Seita.1G236000	4.88569e-08	-2.44684	down		Seita.5G164100	0.00333333	-2.20563	down		Seita.1G322000	0.000134366	-1.05272	down		Seita.1G168000	1.56536e-06	2.93259	up
Seita.1G301300	0.0222581	1.37211	up		Seita.2G166300	1.21206e-08	-4.38159	down		Seita.2G026900	0.00634453	-1.48413	down		Seita.1G191700	0.00152233	1.26338	up		Seita.2G353400	3.59193e-08	3.87199	up		Seita.1G283800	3.28626e-15	-1.65604	down		Seita.1G236400	3.88221e-20	2.0448	up		Seita.5G166200	0.00414155	3.72153	up		Seita.1G322300	0.00533164	1.69511	up		Seita.1G168100	0.00233556	-1.17125	down
Seita.1G301800	0.00917284	2.31062	up		Seita.2G166600	0.00255111	-7.28967	down		Seita.2G029500	0.0186717	-1.05741	down		Seita.1G192100	3.74244e-06	1.67679	up		Seita.2G353800	0.000123916	2.50408	up		Seita.1G284300	1.61707e-13	-3.38538	down		Seita.1G237000	4.71906e-09	-2.50511	down		Seita.5G178400	0.0169694	1.73635	up		Seita.1G322500	0.00816278	1.16653	up		Seita.1G168900	3.58887e-10	1.91622	up
Seita.1G302500	1.62853e-07	-Inf	down		Seita.2G166800	0.0469802	1.55047	up		Seita.2G029600	1.77694e-07	-3.27583	down		Seita.1G192800	0.000441377	-2.12594	down		Seita.2G363400	0.0415439	-2.28874	down		Seita.1G285500	0.00651009	1.61892	up		Seita.1G237200	0.0041103	-1.273	down		Seita.5G191400	0.000352794	2.42466	up		Seita.1G322700	4.31636e-27	3.00709	up		Seita.1G169000	2.38903e-08	1.6241	up
Seita.1G303900	0.0297628	-1.32572	down		Seita.2G167900	0.00959196	-2.16612	down		Seita.2G031300	0.000308945	-1.84593	down		Seita.1G193200	0.000843001	-2.42482	down		Seita.2G372500	0.0299034	-1.67227	down		Seita.1G286500	3.59134e-09	1.25765	up		Seita.1G239200	0.00018877	-1.63755	down		Seita.5G195000	7.21542e-10	-3.81307	down		Seita.1G322800	5.15605e-07	-1.26905	down		Seita.1G169100	0.00513078	-1.18491	down
Seita.1G304100	0.00800297	-1.42244	down		Seita.2G169600	0.0433967	-1.90606	down		Seita.2G033100	0.00983478	-2.01565	down		Seita.1G193600	2.37162e-08	-1.5967	down		Seita.2G372800	0.0277912	1.29575	up		Seita.1G287800	0.000191071	-1.3669	down		Seita.1G239400	5.75629e-20	-2.06516	down		Seita.5G195700	0.0141535	-3.79249	down		Seita.1G323200	0.000696025	-1.69572	down		Seita.1G169400	0.0155757	-1.03826	down
Seita.1G307000	8.01577e-05	-2.03211	down		Seita.2G170600	0.000394466	-4.77443	down		Seita.2G035400	1.62284e-05	4.41247	up		Seita.1G194100	7.28161e-20	2.04261	up		Seita.2G373600	0.000854049	3.30022	up		Seita.1G287900	1.24162e-06	1.05954	up		Seita.1G240400	0.0211818	3.09971	up		Seita.5G201500	0.0148196	1.74387	up		Seita.1G324300	1.20359e-12	2.76916	up		Seita.1G169800	0.0181795	-1.27365	down
Seita.1G308500	2.313e-05	-3.20759	down		Seita.2G174100	0.00403882	-2.2194	down		Seita.2G036400	0.000236443	-2.78835	down		Seita.1G195100	3.12265e-05	1.09457	up		Seita.2G374300	0.00233735	-2.72428	down		Seita.1G291000	5.50004e-07	1.14831	up		Seita.1G240500	2.81211e-20	-2.04399	down		Seita.5G203400	8.21168e-05	-2.61568	down		Seita.1G324700	2.30362e-08	-1.36594	down		Seita.1G170200	5.23116e-09	-3.99895	down
Seita.1G308900	0.00442994	3.76573	up		Seita.2G174400	0.0495919	2.1672	up		Seita.2G037100	0.0406591	-2.05707	down		Seita.1G195200	1.93583e-09	1.34945	up		Seita.2G380300	0.0278609	-2.53863	down		Seita.1G294300	3.06699e-07	1.89643	up		Seita.1G240600	1.04918e-05	-3.68708	down		Seita.5G206800	0.0259719	-1.64224	down		Seita.1G325000	0.000848147	-1.44087	down		Seita.1G170500	0.00333084	-1.41189	down
Seita.1G309800	3.0308e-30	-6.14922	down		Seita.2G175000	0.000865715	2.37221	up		Seita.2G037200	0.00150697	-1.56941	down		Seita.1G196500	1.25923e-11	-4.27695	down		Seita.2G381600	0.00491399	2.34874	up		Seita.1G294400	1.05438e-19	-2.16371	down		Seita.1G241500	4.17872e-07	-1.17519	down		Seita.5G219300	7.6099e-08	4.64762	up		Seita.1G325200	0.00701069	-1.01603	down		Seita.1G170700	1.97496e-27	-2.96432	down
Seita.1G310800	0.00207733	-1.8289	down		Seita.2G176100	0.0301402	2.09695	up		Seita.2G038800	5.84923e-05	-2.09487	down		Seita.1G196600	0.0326025	-1.00868	down		Seita.2G382600	0.0394827	1.5181	up		Seita.1G294800	3.51919e-06	2.87527	up		Seita.1G242300	0.000110733	-1.3994	down		Seita.5G226400	0.0409901	-1.56348	down		Seita.1G325500	0.00175933	1.20863	up		Seita.1G171000	0.000436329	-2.08178	down
Seita.1G311000	0.028061	-1.076	down		Seita.2G179100	4.56015e-08	-3.68408	down		Seita.2G043200	0.000806525	2.10771	up		Seita.1G196900	5.54297e-06	-2.47513	down		Seita.2G382900	0.00994033	-2.02827	down		Seita.1G297200	0.010428	-1.06337	down		Seita.1G242700	2.35626e-06	1.7513	up		Seita.5G236800	0.00573662	-2.44618	down		Seita.1G326600	7.92261e-12	4.02127	up		Seita.1G171800	5.86631e-05	1.68686	up
Seita.1G311100	0.00867613	-1.48086	down		Seita.2G179600	0.00271119	-2.19597	down		Seita.2G045600	0.00754652	1.75313	up		Seita.1G197300	1.30553e-11	1.87827	up		Seita.2G384400	0.0332574	2.30795	up		Seita.1G297600	9.62871e-08	3.43325	up		Seita.1G245500	1.08097e-13	-2.42859	down		Seita.5G237800	0.00499505	4.41662	up		Seita.1G327300	0.0105482	2.78951	up		Seita.1G171900	6.67357e-08	-2.12672	down
Seita.1G312200	8.2257e-05	-1.78072	down		Seita.2G182500	0.041676	2.01509	up		Seita.2G046000	0.0168467	-1.07019	down		Seita.1G197500	1.33441e-09	-4.13297	down		Seita.2G387000	0.0270202	1.47245	up		Seita.1G298100	8.09301e-09	1.24234	up		Seita.1G245800	1.64535e-07	-1.17582	down		Seita.5G242700	2.00558e-06	-3.21264	down		Seita.1G327800	7.0713e-06	1.13411	up		Seita.1G172200	0.00943005	1.07595	up
Seita.1G312600	0.0276387	-1.20087	down		Seita.2G184200	0.017863	-2.90701	down		Seita.2G046100	0.0078705	-1.22089	down		Seita.1G197600	8.46113e-10	-2.83249	down		Seita.2G388200	7.1387e-05	-4.35304	down		Seita.1G300600	9.93192e-06	-1.7716	down		Seita.1G246000	0.00161291	-1.62031	down		Seita.5G243400	0.017882	1.89409	up		Seita.1G329700	1.64603e-08	1.71736	up		Seita.1G172600	0.00453576	1.09564	up
Seita.1G312800	0.00059914	-2.82427	down		Seita.2G184500	0.0389492	6.70197	up		Seita.2G046600	0.0100341	-1.13673	down		Seita.1G198900	0.00846033	-1.60829	down		Seita.2G390800	4.74774e-09	3.0939	up		Seita.1G301900	0.0120205	-1.4138	down		Seita.1G248700	0.0101725	-1.29019	down		Seita.5G246200	0.00161169	-4.0602	down		Seita.1G330100	0.0193991	1.06856	up		Seita.1G174600	1.84454e-07	-1.74964	down
Seita.1G312900	3.25112e-05	-2.87589	down		Seita.2G185100	0.0261634	-1.851	down		Seita.2G047700	1.44075e-11	-Inf	down		Seita.1G199400	0.0259664	1.08128	up		Seita.2G395600	0.0425928	1.29495	up		Seita.1G302500	0.0324155	-2.48514	down		Seita.1G248800	3.99903e-07	-3.73328	down		Seita.5G246600	6.49992e-06	-3.20263	down		Seita.1G330600	6.12597e-06	-1.12649	down		Seita.1G175100	3.66815e-59	-5.67909	down
Seita.1G314800	0.0061761	-1.30582	down		Seita.2G187500	0.00192555	-2.3546	down		Seita.2G049000	3.09805e-06	-3.60256	down		Seita.1G201400	6.08361e-05	1.6854	up		Seita.2G397300	0.0129786	-2.96575	down		Seita.1G303300	7.77979e-15	-1.5805	down		Seita.1G248900	0.000479148	-1.84144	down		Seita.5G257700	0.0310762	1.83051	up		Seita.1G330800	3.52516e-08	3.7251	up		Seita.1G176900	7.00492e-11	3.1033	up
Seita.1G315200	0.00879144	1.86134	up		Seita.2G189200	0.0451162	-2.03526	down		Seita.2G050200	0.0259918	1.69735	up		Seita.1G201700	1.59217e-13	1.88394	up		Seita.2G398900	0.0195171	-2.71147	down		Seita.1G305000	0.0222881	-1.29296	down		Seita.1G249900	0.0222786	1.23324	up		Seita.5G263600	0.00117052	-4.84263	down		Seita.1G331600	9.16089e-07	1.23525	up		Seita.1G177400	2.43465e-05	-1.20484	down
Seita.1G315700	5.12524e-06	2.30752	up		Seita.2G191800	0.00635723	-2.35167	down		Seita.2G050700	4.79517e-09	-5.71196	down		Seita.1G202200	0.00247639	-1.24781	down		Seita.2G399700	0.0339519	1.82779	up		Seita.1G305900	0.0493408	1.07792	up		Seita.1G250200	5.21679e-16	3.58792	up		Seita.5G273900	0.0184659	-2.01454	down		Seita.1G332100	0.00192241	-3.01186	down		Seita.1G177600	6.41212e-21	2.50105	up
Seita.1G316300	0.00749123	-2.14999	down		Seita.2G192500	0.0197641	-3.12078	down		Seita.2G050800	7.79657e-14	-4.03207	down		Seita.1G202300	1.75939e-29	2.44213	up		Seita.2G400500	9.46306e-05	-4.31893	down		Seita.1G306100	6.85944e-18	-2.00706	down		Seita.1G251000	1.37449e-11	3.51264	up		Seita.5G274700	0.0233098	-3.09369	down		Seita.1G333200	1.06803e-12	-1.83604	down		Seita.1G177700	0.0106381	-2.48262	down
Seita.1G316700	0.0005922	-1.57439	down		Seita.2G194200	0.0276375	-1.86528	down		Seita.2G053300	0.00117358	3.04248	up		Seita.1G203300	3.94285e-06	-1.6586	down		Seita.2G402800	3.60354e-06	3.12341	up		Seita.1G307000	2.54965e-10	-6.36027	down		Seita.1G251400	0.00117047	1.66699	up		Seita.5G282100	0.0284576	-1.68251	down		Seita.1G335000	2.11242e-05	-2.20425	down		Seita.1G177900	0.0458667	1.1605	up
Seita.1G318100	0.0417315	-1.94961	down		Seita.2G194700	0.0201548	-2.20915	down		Seita.2G053400	0.000424836	3.2817	up		Seita.1G203700	0.000595466	-1.91674	down		Seita.2G405900	0.00612357	1.59827	up		Seita.1G308800	1.22877e-08	-1.22824	down		Seita.1G252200	4.50399e-41	6.12679	up		Seita.5G284000	0.0328941	1.65671	up		Seita.1G335300	0.0197215	-2.27286	down		Seita.1G178300	5.47327e-10	-2.30371	down
Seita.1G318800	0.0170974	1.63965	up		Seita.2G199600	3.84356e-07	3.55757	up		Seita.2G053700	5.55769e-05	2.74126	up		Seita.1G204000	2.10716e-13	-1.50779	down		Seita.2G406400	0.0182516	-1.45329	down		Seita.1G308900	0.00317163	1.02955	up		Seita.1G253100	2.44155e-22	-2.24537	down		Seita.5G287800	7.91685e-05	Inf	up		Seita.1G336500	2.08155e-06	-1.25216	down		Seita.1G178800	0.00022361	-1.02372	down
Seita.1G320100	0.00483071	-1.59667	down		Seita.2G200900	0.0145402	2.08912	up		Seita.2G053800	0.00397815	2.80651	up		Seita.1G204900	7.14465e-12	-2.04188	down		Seita.2G406500	4.05432e-07	4.59064	up		Seita.1G309600	2.3639e-18	5.85397	up		Seita.1G253500	3.52702e-05	-1.31369	down		Seita.5G298300	0.0132001	2.4205	up		Seita.1G336800	1.0226e-18	-2.13709	down		Seita.1G179000	0.000990092	2.01738	up
Seita.1G322800	9.11831e-07	3.76263	up		Seita.2G202900	0.00882986	-5.73318	down		Seita.2G057400	0.0251394	2.39099	up		Seita.1G205000	2.0511e-09	-1.96804	down		Seita.2G410300	0.000247272	-2.5479	down		Seita.1G314700	1.3135e-05	1.28693	up		Seita.1G253700	5.35434e-25	2.42965	up		Seita.5G303900	4.32832e-07	-6.32114	down		Seita.1G337400	0.000182518	-1.05075	down		Seita.1G180000	0.00129432	1.2889	up
Seita.1G323700	0.000313297	-2.22034	down		Seita.2G204400	0.00283409	-4.89349	down		Seita.2G058900	7.80992e-06	2.95917	up		Seita.1G205100	0.000194133	-2.1665	down		Seita.2G415900	0.0135201	-1.50298	down		Seita.1G314800	6.64337e-05	-1.03697	down		Seita.1G254000	1.55509e-12	-1.58989	down		Seita.5G307400	0.00905322	2.18321	up		Seita.1G337500	3.64751e-07	-2.32605	down		Seita.1G180500	6.0133e-12	-1.82621	down
Seita.1G324100	8.54957e-06	-2.67902	down		Seita.2G205400	0.000623421	-2.39124	down		Seita.2G061700	0.0276586	-1.27314	down		Seita.1G205200	0.0231468	1.10089	up		Seita.2G418500	6.3428e-05	-2.24234	down		Seita.1G315200	1.36195e-09	2.7531	up		Seita.1G254500	0.0198654	1.02661	up		Seita.5G311200	0.020254	2.58268	up		Seita.1G338300	0.0139805	1.33091	up		Seita.1G180600	0.00417596	-1.03361	down
Seita.1G324300	0.00428433	1.71506	up		Seita.2G205600	0.0067175	3.01757	up		Seita.2G065100	1.72841e-05	-1.77675	down		Seita.1G206000	6.20581e-10	-1.28742	down		Seita.2G426200	7.04635e-05	-2.3845	down		Seita.1G315300	0.000416652	2.12925	up		Seita.1G254600	0.00973701	-1.49023	down		Seita.5G312000	0.00112939	-4.28796	down		Seita.1G339100	0.000147695	-1.66831	down		Seita.1G180700	0.00247594	-2.41569	down
Seita.1G324800	3.34356e-07	-3.82154	down		Seita.2G206000	0.00480026	-4.12451	down		Seita.2G066600	4.48583e-08	-2.18873	down		Seita.1G208000	0.00612034	1.58555	up		Seita.2G429000	0.0146582	1.61412	up		Seita.1G316900	0.00020039	2.22918	up		Seita.1G256100	1.88088e-32	5.25962	up		Seita.5G314300	0.00289945	4.00431	up		Seita.1G340500	0.00564747	-6.27395	down		Seita.1G180900	0.00423508	1.59849	up
Seita.1G325400	0.0302015	-1.17722	down		Seita.2G207200	0.0364232	-2.20337	down		Seita.2G069800	2.58489e-10	2.58656	up		Seita.1G208600	6.75585e-10	-5.48855	down		Seita.2G429200	0.0121747	-1.84851	down		Seita.1G317600	0.000147205	-1.53445	down		Seita.1G256800	9.66396e-07	-1.34349	down		Seita.5G319300	0.0101023	-4.08028	down		Seita.1G341200	2.64139e-06	-1.9194	down		Seita.1G181000	8.21296e-34	-7.01816	down
Seita.1G326000	0.01441	-2.66741	down		Seita.2G209100	0.0412699	-2.2112	down		Seita.2G070700	0.00031244	2.07027	up		Seita.1G208700	5.39712e-22	-5.35428	down		Seita.2G429800	0.000508491	-3.11056	down		Seita.1G317800	4.68816e-10	-1.32054	down		Seita.1G257600	6.13946e-08	-1.37124	down		Seita.5G322200	6.06154e-07	-6.73243	down		Seita.1G342400	4.67897e-28	2.96646	up		Seita.1G181500	1.38834e-12	-3.93752	down
Seita.1G326600	0.00049523	-1.69687	down		Seita.2G209400	0.00637982	-3.61059	down		Seita.2G075500	1.19687e-08	-3.07507	down		Seita.1G209700	0.000208182	-1.11555	down		Seita.2G429900	1.1972e-05	-5.18629	down		Seita.1G318100	1.07991e-14	-7.31831	down		Seita.1G257800	4.11394e-12	-2.70019	down		Seita.5G334500	6.85104e-08	-7.54355	down		Seita.1G345400	0.00117866	-1.07907	down		Seita.1G181900	3.06089e-14	-2.1557	down
Seita.1G327000	2.92561e-06	-4.43631	down		Seita.2G216300	1.16183e-07	-4.42529	down		Seita.2G078100	0.0357159	-1.72762	down		Seita.1G210300	1.12262e-39	2.78321	up		Seita.2G432200	0.0339437	-1.6543	down		Seita.1G318200	6.06712e-11	1.34331	up		Seita.1G258300	6.10356e-24	2.68535	up		Seita.5G342900	0.0343849	3.74852	up		Seita.1G346100	0.0262354	1.43097	up		Seita.1G182300	2.02501e-12	-2.02987	down
Seita.1G329900	0.00296195	-2.32629	down		Seita.2G216500	5.84397e-08	3.85356	up		Seita.2G080200	5.59017e-12	Inf	up		Seita.1G212000	5.82591e-08	-1.50474	down		Seita.2G434300	2.20744e-05	-2.48942	down		Seita.1G318800	1.10474e-06	1.08387	up		Seita.1G259100	0.0121864	-1.29815	down		Seita.5G346500	5.40323e-06	3.47939	up		Seita.1G346400	9.07865e-05	-1.13782	down		Seita.1G182500	0.00484098	1.38335	up
Seita.1G331300	0.0491543	2.40965	up		Seita.2G220800	0.0142349	-1.82281	down		Seita.2G080900	0.00260935	-1.72993	down		Seita.1G212200	6.68424e-06	-1.36185	down		Seita.2G436100	9.48422e-05	2.36062	up		Seita.1G319600	2.59675e-05	2.32179	up		Seita.1G259400	1.04648e-15	-2.83822	down		Seita.5G355000	0.000151733	4.83148	up		Seita.1G346600	0.000188141	-1.67176	down		Seita.1G182800	5.49422e-41	3.78361	up
Seita.1G331600	0.0445254	-1.19948	down		Seita.2G221900	5.36578e-05	-2.74721	down		Seita.2G081000	6.06489e-18	5.97171	up		Seita.1G212300	2.28353e-21	6.02873	up		Seita.2G436200	0.00838925	-1.73658	down		Seita.1G320800	0.0339125	-1.03149	down		Seita.1G259900	5.67435e-05	-1.95202	down		Seita.5G355500	0.000457949	-4.44434	down		Seita.1G346800	1.74063e-13	-4.80819	down		Seita.1G184600	0.00112316	1.29527	up
Seita.1G332000	8.71601e-07	-3.22786	down		Seita.2G224000	0.00380047	-2.16511	down		Seita.2G083700	0.00554834	2.15471	up		Seita.1G213900	0.000151152	-1.1391	down		Seita.2G436600	0.0376688	-1.41292	down		Seita.1G322300	0.00891875	1.50888	up		Seita.1G260600	0.0320854	-1.0349	down		Seita.5G360700	0.0413502	1.67493	up		Seita.1G347700	0.0300767	-1.1044	down		Seita.1G185000	0.00295561	1.70872	up
Seita.1G332900	0.00665335	-1.9888	down		Seita.2G225100	0.000979538	-2.57858	down		Seita.2G087900	0.00554834	-2.5331	down		Seita.1G214100	7.40089e-20	1.8809	up		Seita.2G437900	0.0102673	10.0327	up		Seita.1G322500	2.10522e-06	1.92738	up		Seita.1G260700	1.35223e-07	-2.44724	down		Seita.5G363100	0.0406101	-3.53566	down		Seita.1G348100	4.26241e-16	1.97691	up		Seita.1G185100	0.0126029	-1.67097	down
Seita.1G333100	3.20581e-06	-2.14234	down		Seita.2G226300	0.0301936	-4.49246	down		Seita.2G089100	0.00267356	4.09397	up		Seita.1G215300	7.32297e-20	2.54967	up		Seita.2G438500	1.28975e-19	8.6165	up		Seita.1G322700	7.02761e-97	4.70173	up		Seita.1G260800	4.02992e-06	-2.13723	down		Seita.5G363900	0.00913568	-1.82768	down		Seita.1G348600	0.000106169	-1.0305	down		Seita.1G185300	0.00113094	1.90639	up
Seita.1G333600	0.0467217	1.28553	up		Seita.2G229900	3.4345e-05	4.29157	up		Seita.2G092300	7.65363e-07	1.96596	up		Seita.1G215600	5.50576e-08	-1.20437	down		Seita.2G441900	0.0134093	2.78939	up		Seita.1G323400	0.0225784	-1.35649	down		Seita.1G261400	0.000287174	2.29366	up		Seita.5G376100	0.000293978	2.87017	up		Seita.1G349500	0.0251955	1.40524	up		Seita.1G185500	0.014102	1.69939	up
Seita.1G334400	0.00403003	-1.47983	down		Seita.2G231900	0.0327082	-3.02422	down		Seita.2G092400	0.006431	-2.12863	down		Seita.1G215900	4.44321e-05	1.79489	up		Seita.2G444300	0.00896176	1.53944	up		Seita.1G324300	1.27342e-36	3.42314	up		Seita.1G261600	0.000120797	1.01108	up		Seita.5G378200	0.00110023	-2.76089	down		Seita.1G349700	0.0200083	2.06045	up		Seita.1G186200	0.000166107	-1.45751	down
Seita.1G335000	0.00909323	-1.55668	down		Seita.2G232100	0.0357657	-2.08848	down		Seita.2G094800	7.78238e-05	-1.64885	down		Seita.1G216100	0.00127009	-1.68209	down		Seita.3G002200	2.44878e-08	5.60788	up		Seita.1G326600	3.16372e-16	3.49815	up		Seita.1G262500	5.90912e-06	-1.35156	down		Seita.5G378400	0.0108927	3.84157	up		Seita.1G349800	0.0117594	1.28626	up		Seita.1G186500	4.17909e-19	2.52112	up
Seita.1G335400	0.00761445	1.283	up		Seita.2G233300	0.0367928	-1.58021	down		Seita.2G095400	0.000106863	-2.79476	down		Seita.1G217400	0.0114387	-8.09231	down		Seita.3G005400	0.0399022	-1.60193	down		Seita.1G327300	1.36984e-18	3.82317	up		Seita.1G263000	6.08142e-91	7.4627	up		Seita.5G381100	0.000118139	3.15755	up		Seita.1G350600	0.00085927	-1.01344	down		Seita.1G187000	0.0322596	-1.02261	down
Seita.1G336200	0.000417805	2.59794	up		Seita.2G234200	0.0190205	1.88895	up		Seita.2G095900	0.00207914	1.76628	up		Seita.1G217800	0.000102224	-2.11647	down		Seita.3G006100	3.63374e-09	-5.72131	down		Seita.1G327400	0.00200719	1.08066	up		Seita.1G263100	2.94954e-06	2.60227	up		Seita.5G393300	4.04827e-06	2.84925	up		Seita.1G352200	1.03233e-05	-1.1726	down		Seita.1G187200	3.46606e-24	-2.73689	down
Seita.1G336500	0.0496738	1.3611	up		Seita.2G235200	0.000683729	-2.55284	down		Seita.2G097400	0.000221417	-1.92441	down		Seita.1G217900	9.98785e-41	-2.75057	down		Seita.3G009200	0.0133976	-1.7771	down		Seita.1G327800	2.23993e-26	2.16989	up		Seita.1G264400	1.15324e-10	-2.11281	down		Seita.5G393800	0.017882	2.46893	up		Seita.1G353600	1.15971e-16	-2.45413	down		Seita.1G188100	9.45954e-05	2.41057	up
Seita.1G336900	7.18947e-05	-2.05108	down		Seita.2G237200	0.000354268	-2.64872	down		Seita.2G097500	5.22604e-08	-2.32343	down		Seita.1G219200	1.01525e-10	-6.17565	down		Seita.3G011900	0.0354417	-1.44793	down		Seita.1G327900	8.3118e-08	1.1721	up		Seita.1G265400	5.1468e-05	-1.11125	down		Seita.5G403300	4.74975e-05	-2.85994	down		Seita.1G354100	0.00202591	-2.25206	down		Seita.1G188700	0.00100214	-1.04799	down
Seita.1G338100	0.000165058	-1.76236	down		Seita.2G237300	0.00302746	-3.39827	down		Seita.2G106700	1.13181e-12	-6.53255	down		Seita.1G219700	8.67978e-12	-3.7901	down		Seita.3G017900	0.0331579	-3.49615	down		Seita.1G330800	1.23455e-07	9.35614	up		Seita.1G265600	7.6928e-12	4.61905	up		Seita.5G417700	0.000742731	-2.48878	down		Seita.1G356200	7.64376e-06	-1.40694	down		Seita.1G189700	1.09245e-06	-1.55411	down
Seita.1G339700	0.0183488	-1.35723	down		Seita.2G238800	0.000727331	3.89104	up		Seita.2G107900	0.00929167	2.11417	up		Seita.1G220300	0.0163671	-1.36696	down		Seita.3G018200	7.44623e-05	-3.21678	down		Seita.1G331500	6.07355e-08	-1.16014	down		Seita.1G266400	8.25516e-07	1.88541	up		Seita.5G422900	0.0462991	4.36931	up		Seita.1G357600	8.12021e-05	-1.06917	down		Seita.1G190600	0.000488075	-1.02423	down
Seita.1G339900	0.000957677	-4.47457	down		Seita.2G239200	0.0401954	-2.41216	down		Seita.2G108100	0.000162357	1.68799	up		Seita.1G220400	6.52348e-18	3.15354	up		Seita.3G020300	0.0429683	1.96497	up		Seita.1G332000	2.4141e-10	-2.31955	down		Seita.1G266800	2.49126e-18	-2.32195	down		Seita.5G428300	0.000214916	-3.43137	down		Seita.1G358900	4.84437e-13	1.96947	up		Seita.1G190900	1.82855e-18	-5.46	down
Seita.1G340100	3.04401e-13	-5.81843	down		Seita.2G240800	0.0361062	1.61164	up		Seita.2G108400	0.0499496	1.71299	up		Seita.1G221500	3.73604e-07	1.09029	up		Seita.3G021400	0.0153621	1.554	up		Seita.1G336800	2.60861e-30	-2.34549	down		Seita.1G267000	1.34291e-13	-2.68265	down		Seita.5G428600	0.0454078	2.87558	up		Seita.1G362000	4.19638e-18	-4.2249	down		Seita.1G191100	0.0012195	1.97462	up
Seita.1G342400	0.0347609	1.23864	up		Seita.2G241800	0.0327786	1.94494	up		Seita.2G109200	0.000162679	1.72698	up		Seita.1G221800	1.05042e-05	-1.54213	down		Seita.3G022000	0.0473559	-2.03031	down		Seita.1G337500	1.269e-16	-2.28499	down		Seita.1G267100	1.01698e-07	1.23673	up		Seita.5G441700	0.0242606	1.65064	up		Seita.1G362500	1.80755e-08	1.67551	up		Seita.1G191700	0.00354279	1.37185	up
Seita.1G344600	0.0320863	1.06169	up		Seita.2G245500	0.00829377	-2.19828	down		Seita.2G117000	0.0027557	-1.65276	down		Seita.1G221900	0.0355936	1.087	up		Seita.3G022600	0.0136125	-6.43868	down		Seita.1G339100	1.03082e-09	-2.82937	down		Seita.1G267200	3.39343e-25	3.60298	up		Seita.5G445600	0.000733648	-7.21735	down		Seita.1G362600	0.000137944	1.16206	up		Seita.1G192000	0.0289341	1.92824	up
Seita.1G344900	1.19763e-08	-4.7435	down		Seita.2G245800	0.00909727	-3.08648	down		Seita.2G117700	0.00691178	-1.17807	down		Seita.1G223700	1.52191e-05	-3.96297	down		Seita.3G024000	0.0011451	-2.43091	down		Seita.1G339200	3.86815e-13	Inf	up		Seita.1G267400	1.05843e-09	-1.35644	down		Seita.5G446600	0.0230933	-1.70739	down		Seita.1G362700	0.0154022	-1.38726	down		Seita.1G192100	0.00300112	1.35946	up
Seita.1G345900	0.0176257	-3.03834	down		Seita.2G246900	0.0341778	-1.78115	down		Seita.2G118100	0.000446164	1.48582	up		Seita.1G225000	0.0082538	1.36233	up		Seita.3G028500	5.5431e-05	-4.23783	down		Seita.1G339500	4.80103e-13	1.47871	up		Seita.1G267500	1.26428e-05	2.11196	up		Seita.5G448400	0.0175669	-2.15599	down		Seita.1G363800	2.06565e-05	-1.04603	down		Seita.1G192500	0.00397942	1.65635	up
Seita.1G346700	0.000891538	2.63368	up		Seita.2G248900	0.0462377	-4.38475	down		Seita.2G119000	1.25782e-05	3.24845	up		Seita.1G225300	1.79079e-18	-2.97394	down		Seita.3G030400	0.00635264	2.08814	up		Seita.1G339600	5.95542e-09	1.78472	up		Seita.1G268000	1.09451e-07	1.20321	up		Seita.5G454800	4.48918e-08	-4.18832	down		Seita.1G363900	0.00128612	-1.27687	down		Seita.1G192800	0.00753723	-1.59071	down
Seita.1G347900	0.00889237	1.94499	up		Seita.2G250200	0.0064594	-3.53027	down		Seita.2G119300	0.00379359	-1.22164	down		Seita.1G227000	4.00899e-12	-1.7049	down		Seita.3G031300	0.0127755	1.70829	up		Seita.1G341200	0.00166503	-1.1649	down		Seita.1G268200	5.71182e-13	2.83297	up		Seita.5G463200	5.35625e-08	3.75384	up		Seita.1G364200	0.0095725	1.41245	up		Seita.1G193600	0.000101095	-1.08018	down
Seita.1G349400	0.0116683	-1.76065	down		Seita.2G251100	0.0141541	-1.76958	down		Seita.2G119700	0.0246582	1.87383	up		Seita.1G228500	9.52289e-06	2.51786	up		Seita.3G032600	2.66459e-09	-3.3799	down		Seita.1G342400	1.43296e-64	3.72896	up		Seita.1G268300	1.59282e-07	1.28774	up		Seita.5G467700	0.000951125	-5.02604	down		Seita.1G365200	6.10169e-14	1.83068	up		Seita.1G194100	0.0479175	1.30463	up
Seita.1G349600	0.00163041	-1.72804	down		Seita.2G254100	0.000787362	5.79774	up		Seita.2G125200	0.00552186	1.35061	up		Seita.1G228800	6.14424e-05	1.2761	up		Seita.3G032700	0.0456657	-1.33196	down		Seita.1G343900	2.05408e-05	-2.10159	down		Seita.1G268400	0.00583885	1.48618	up		Seita.5G468100	0.00905322	-1.85873	down		Seita.1G365300	0.000912857	1.03596	up		Seita.1G195900	0.0362632	1.06345	up
Seita.1G349700	7.05741e-07	-2.62786	down		Seita.2G254900	0.00043319	-4.35721	down		Seita.2G128600	9.48099e-05	3.79856	up		Seita.1G230000	3.67208e-09	-3.66347	down		Seita.3G034900	0.00364394	3.15806	up		Seita.1G345400	3.15999e-09	-1.59461	down		Seita.1G268500	0.00126845	1.61572	up		Seita.6G005300	6.07796e-16	5.69652	up		Seita.1G366500	0.00831434	-1.0433	down		Seita.1G196100	3.48452e-05	1.14642	up
Seita.1G353200	0.00152998	1.82406	up		Seita.2G257000	0.0254565	1.78015	up		Seita.2G129100	0.0326439	-1.41916	down		Seita.1G230100	1.93493e-11	-1.86654	down		Seita.3G036400	0.000358262	7.6503	up		Seita.1G346600	0.00586725	-1.26147	down		Seita.1G268600	4.47951e-24	-2.57971	down		Seita.6G015200	1.71247e-05	-4.19809	down		Seita.1G367400	0.00825372	1.81961	up		Seita.1G196500	0.000739869	-3.19868	down
Seita.1G353500	0.00157487	1.71579	up		Seita.2G260500	0.00801213	3.41061	up		Seita.2G129800	0.00938074	1.15946	up		Seita.1G231200	0.000336923	1.14145	up		Seita.3G037000	0.000696955	-2.1508	down		Seita.1G346700	1.23729e-09	1.31244	up		Seita.1G269300	0.00157664	1.46983	up		Seita.6G015300	8.21168e-05	-4.9868	down		Seita.1G367700	0.000982041	1.86276	up		Seita.1G196900	3.05443e-09	-2.50315	down
Seita.1G354100	3.09102e-05	-2.74147	down		Seita.2G262500	0.0225695	-2.60667	down		Seita.2G130600	0.0114011	1.91197	up		Seita.1G231400	2.79647e-09	1.22515	up		Seita.3G038400	0.0280059	-1.47945	down		Seita.1G346900	0.00748469	-1.09168	down		Seita.1G270200	0.0129315	-1.55386	down		Seita.6G015400	3.40461e-06	-5.30347	down		Seita.1G367900	0.0322161	1.16638	up		Seita.1G197500	1.31473e-05	-2.96468	down
Seita.1G354600	0.021588	1.39702	up		Seita.2G263000	0.0129337	-1.83419	down		Seita.2G131500	3.03298e-05	2.18025	up		Seita.1G232200	0.011226	-1.38056	down		Seita.3G040300	0.0457464	-2.4419	down		Seita.1G347300	5.40212e-05	-1.01728	down		Seita.1G270500	2.43694e-08	-1.41624	down		Seita.6G015500	0.0117953	-3.92074	down		Seita.1G368400	1.05963e-06	-1.20518	down		Seita.1G197600	5.07914e-05	-2.20889	down
Seita.1G355600	0.0304274	-1.70405	down		Seita.2G263800	4.52414e-09	-3.92863	down		Seita.2G133200	0.0070016	-1.16222	down		Seita.1G232500	0.00121888	-1.07557	down		Seita.3G044100	0.000466303	3.79713	up		Seita.1G347700	7.29096e-05	-1.81031	down		Seita.1G270800	6.67312e-06	-2.8536	down		Seita.6G016200	0.00681099	2.04358	up		Seita.1G369200	7.48054e-05	1.57039	up		Seita.1G197800	1.16231e-11	-2.27639	down
Seita.1G356800	0.00490877	1.78313	up		Seita.2G266800	0.00830797	2.12335	up		Seita.2G134000	2.07473e-78	-10.6824	down		Seita.1G235000	0.00204463	-1.52867	down		Seita.3G047200	0.0360836	-3.49251	down		Seita.1G348100	5.99654e-20	1.87347	up		Seita.1G272200	4.5135e-07	-3.27704	down		Seita.6G033500	0.0330504	-6.28005	down		Seita.1G371900	0.00540755	-1.09605	down		Seita.1G198300	0.00607715	1.02345	up
Seita.1G357500	1.22171e-05	-4.08546	down		Seita.2G267400	0.0293732	2.05499	up		Seita.2G136800	0.0384285	1.5194	up		Seita.1G236400	2.37816e-22	2.03734	up		Seita.3G055800	0.000173873	-2.12602	down		Seita.1G349700	4.39721e-05	2.39542	up		Seita.1G272900	1.23143e-87	5.24637	up		Seita.6G043100	0.0227144	1.99071	up		Seita.1G372300	0.00807046	1.59431	up		Seita.1G198500	0.023979	-1.75379	down
Seita.1G357600	0.0151313	-1.22011	down		Seita.2G275600	2.6927e-05	-6.81311	down		Seita.2G137200	0.0479856	1.50015	up		Seita.1G237000	0.000819596	-3.72605	down		Seita.3G057400	0.0236082	1.50769	up		Seita.1G349900	0.00328914	1.9999	up		Seita.1G273000	3.82871e-08	6.83914	up		Seita.6G070700	0.0256811	-1.88867	down		Seita.1G373600	3.58158e-55	5.08366	up		Seita.1G199400	0.029665	1.14331	up
Seita.1G357800	0.00487494	-1.35296	down		Seita.2G279000	0.000178392	-2.55939	down		Seita.2G141500	4.84558e-10	5.60203	up		Seita.1G237200	0.00467292	-1.28532	down		Seita.3G060600	0.00170429	-2.92043	down		Seita.1G350600	3.38989e-07	-1.25474	down		Seita.1G273500	0.00816133	-1.27702	down		Seita.6G075900	0.00218612	-2.42302	down		Seita.1G375800	4.26318e-35	-8.08931	down		Seita.1G201400	4.78943e-05	1.97868	up
Seita.1G357900	0.0475698	1.04396	up		Seita.2G281300	0.00835424	-2.41195	down		Seita.2G141700	0.0374837	-1.05106	down		Seita.1G239000	8.69549e-09	1.30954	up		Seita.3G063000	0.00156518	-4.13392	down		Seita.1G353600	8.60986e-16	-2.50617	down		Seita.1G273600	1.56913e-09	-1.35921	down		Seita.6G086100	0.0196494	-1.85686	down		Seita.1G376700	1.58429e-05	-1.12454	down		Seita.1G201700	4.7871e-09	2.08476	up
Seita.1G359100	1.18786e-05	-2.53913	down		Seita.2G281700	0.00512434	-2.01392	down		Seita.2G142500	2.29884e-09	2.37547	up		Seita.1G239200	7.86807e-05	-1.65695	down		Seita.3G068600	0.000721931	-1.9865	down		Seita.1G354100	5.49858e-10	-3.10654	down		Seita.1G274100	8.85557e-16	2.53279	up		Seita.6G090000	0.0013495	-2.83487	down		Seita.1G377800	0.0145748	1.18833	up		Seita.1G202300	4.21824e-33	3.29499	up
Seita.1G360100	0.0222581	-1.81355	down		Seita.2G283500	3.52923e-06	-3.27415	down		Seita.2G142900	0.0412387	1.40411	up		Seita.1G239400	1.72176e-30	-2.63425	down		Seita.3G072400	1.01285e-08	-4.44464	down		Seita.1G354600	9.96453e-06	2.42224	up		Seita.1G274400	0.000283938	-1.25855	down		Seita.6G105300	0.0290781	-2.70192	down		Seita.1G378400	2.7807e-05	-2.82879	down		Seita.1G203700	8.85814e-06	-2.52224	down
Seita.1G362600	0.00229379	1.42508	up		Seita.2G289100	0.0142349	-2.23086	down		Seita.2G143400	0.0411005	-1.0158	down		Seita.1G239600	5.40472e-06	1.34724	up		Seita.3G073900	0.0136183	-1.50963	down		Seita.1G357600	1.91377e-07	-1.1812	down		Seita.1G274500	3.75182e-05	-1.84733	down		Seita.6G110100	0.0330445	-2.34661	down		Seita.1G380300	8.78601e-06	-1.09884	down		Seita.1G203900	0.00349211	-1.38445	down
Seita.1G367300	0.0323398	-1.29943	down		Seita.2G290300	0.00914145	2.78263	up		Seita.2G145900	0.00084782	-1.70102	down		Seita.1G240500	4.63695e-20	-2.47044	down		Seita.3G074300	0.0135409	-2.77202	down		Seita.1G360400	0.013775	-1.33613	down		Seita.1G275000	0.000159561	-1.37954	down		Seita.6G114400	0.0454078	-2.74327	down		Seita.2G000200	0.00763923	1.46781	up		Seita.1G204000	3.37118e-09	-1.61522	down
Seita.1G367600	0.0328283	-1.53942	down		Seita.2G291300	0.00150536	2.37633	up		Seita.2G146000	4.33099e-08	-4.39555	down		Seita.1G240600	6.49282e-11	-2.50378	down		Seita.3G074700	0.0381577	2.45201	up		Seita.1G362000	4.10177e-90	-6.47993	down		Seita.1G275400	6.32156e-05	1.98405	up		Seita.6G122600	5.60266e-07	3.69413	up		Seita.2G000400	0.0230614	1.83244	up		Seita.1G204200	0.000130482	-1.49754	down
Seita.1G367700	0.045137	-1.50874	down		Seita.2G294200	0.0122304	1.92388	up		Seita.2G147100	0.000445937	-1.52404	down		Seita.1G241300	1.15922e-08	-1.26861	down		Seita.3G076700	0.000196232	-7.16616	down		Seita.1G364200	0.000128499	1.64595	up		Seita.1G276300	5.42782e-08	-2.46102	down		Seita.6G123500	6.66563e-08	5.40169	up		Seita.2G000900	1.12279e-06	1.39045	up		Seita.1G204900	5.35934e-22	-2.79779	down
Seita.1G369100	0.000764715	-2.5174	down		Seita.2G294400	0.0106122	-3.13928	down		Seita.2G148000	2.16329e-06	3.02757	up		Seita.1G241500	7.76738e-06	-1.95591	down		Seita.3G076800	0.00652633	-3.08746	down		Seita.1G365200	1.65523e-74	4.21314	up		Seita.1G277300	1.97785e-12	-1.77038	down		Seita.6G137600	0.0436939	1.91622	up		Seita.2G001800	0.00105318	-1.05119	down		Seita.1G205000	2.22874e-18	-2.77824	down
Seita.1G370300	0.000216632	-2.62575	down		Seita.2G295200	0.000722992	-4.04103	down		Seita.2G149000	0.000554433	2.2411	up		Seita.1G242300	3.03022e-22	-3.58199	down		Seita.3G079000	3.97659e-05	-5.15817	down		Seita.1G365300	0.000199102	1.07657	up		Seita.1G277900	2.96776e-06	-1.53111	down		Seita.6G138200	0.000787676	-3.25619	down		Seita.2G002300	0.000626219	-1.85616	down		Seita.1G205100	0.000260843	-4.42498	down
Seita.1G371900	6.69844e-07	-2.98996	down		Seita.2G295600	2.08918e-06	-6.36497	down		Seita.2G149300	0.0317512	1.07517	up		Seita.1G244200	0.000176507	2.14451	up		Seita.3G082100	0.030776	-2.23773	down		Seita.1G366500	3.84331e-05	-2.4719	down		Seita.1G278500	5.00073e-10	1.37068	up		Seita.6G152300	0.00260842	4.98157	up		Seita.2G003500	0.00324385	-1.6377	down		Seita.1G205900	0.0221349	-1.35717	down
Seita.1G372500	0.0441822	1.70417	up		Seita.2G296000	0.000272645	-4.2561	down		Seita.2G150900	0.00357969	-2.28054	down		Seita.1G245200	0.00610921	-1.52718	down		Seita.3G082800	0.00740457	-3.68351	down		Seita.1G367200	8.19908e-13	-3.39273	down		Seita.1G278900	0.001849	-1.64576	down		Seita.6G159000	1.05581e-09	-3.6924	down		Seita.2G003600	4.63835e-12	-1.92798	down		Seita.1G206500	0.000369784	-1.55457	down
Seita.1G372800	0.00487832	-1.8432	down		Seita.2G296300	0.000814928	-3.59847	down		Seita.2G151800	0.000108585	1.58531	up		Seita.1G245500	1.82223e-17	-4.24911	down		Seita.3G085500	0.0342725	2.2991	up		Seita.1G367700	0.00214093	1.63575	up		Seita.1G280200	4.37707e-09	-1.45076	down		Seita.6G166200	0.0187462	-3.30336	down		Seita.2G006300	0.000590053	2.05248	up		Seita.1G206700	2.58567e-16	-2.35956	down
Seita.1G373600	4.22802e-05	2.58191	up		Seita.2G296700	0.00350565	-3.51836	down		Seita.2G154400	0.000805908	-1.45385	down		Seita.1G246100	0.00078045	1.15184	up		Seita.3G086800	0.0110854	-3.26176	down		Seita.1G371900	2.3928e-07	-1.81671	down		Seita.1G281400	8.25195e-20	-3.18511	down		Seita.6G170200	0.000151095	-3.35933	down		Seita.2G006500	0.0085666	1.45131	up		Seita.1G207200	0.0016833	-1.78982	down
Seita.1G373700	0.0105823	2.08593	up		Seita.2G296900	0.000523984	-4.06466	down		Seita.2G154700	1.40171e-05	-4.08439	down		Seita.1G246800	5.91004e-07	1.10539	up		Seita.3G087800	0.00196112	-3.46872	down		Seita.1G372300	2.0435e-06	2.04086	up		Seita.1G282400	5.73106e-08	-1.88708	down		Seita.6G171600	0.0391437	-2.38314	down		Seita.2G007300	0.0454426	1.25697	up		Seita.1G208300	0.000293198	-1.737	down
Seita.1G374300	0.0400147	-1.61492	down		Seita.2G297500	0.0260693	2.59018	up		Seita.2G156300	7.97455e-08	4.79527	up		Seita.1G247000	6.2821e-94	-8.13565	down		Seita.3G089400	0.0234431	-4.3705	down		Seita.1G373600	1.9763e-41	3.41819	up		Seita.1G282900	0.00115671	-1.1109	down		Seita.6G206500	0.0300531	-1.58583	down		Seita.2G013800	8.04826e-08	1.56431	up		Seita.1G208400	0.000126097	-1.3268	down
Seita.1G375700	0.00197311	1.47994	up		Seita.2G298700	0.00465419	-2.13232	down		Seita.2G156700	0.0105968	1.87736	up		Seita.1G247400	0.00315779	-1.2125	down		Seita.3G090400	0.00442954	-1.67107	down		Seita.1G373700	0.0273112	1.35917	up		Seita.1G283900	3.74701e-06	2.01499	up		Seita.6G211600	0.000136082	3.91945	up		Seita.2G014200	0.000976352	1.47822	up		Seita.1G208600	7.03743e-05	-2.89325	down
Seita.1G376100	0.0398884	1.61205	up		Seita.2G304700	2.20374e-12	Inf	up		Seita.2G157500	5.35434e-06	-4.58815	down		Seita.1G248700	8.48492e-05	-2.0148	down		Seita.3G093900	6.76669e-10	3.61528	up		Seita.1G376000	0.000947402	-1.207	down		Seita.1G284300	1.46963e-14	-1.85263	down		Seita.6G215100	0.000154064	2.91338	up		Seita.2G016000	2.30595e-05	2.21898	up		Seita.1G208700	2.99697e-05	-4.00609	down
Seita.1G376600	0.0401344	-1.61159	down		Seita.2G307900	0.0499003	-2.025	down		Seita.2G159000	1.29799e-06	1.90173	up		Seita.1G248800	2.81874e-08	-3.39209	down		Seita.3G096100	0.0271458	-2.46078	down		Seita.1G376200	1.20994e-06	-1.13712	down		Seita.1G284600	0.00767172	-1.43671	down		Seita.6G217200	0.0262018	-2.21294	down		Seita.2G016400	0.000161159	1.753	up		Seita.1G210300	7.13582e-20	2.43586	up
Seita.1G378600	0.00372303	-2.01589	down		Seita.2G308300	1.3705e-06	4.32782	up		Seita.2G159500	0.0373616	1.1725	up		Seita.1G250200	0.0017148	1.12575	up		Seita.3G096200	0.000333365	-2.21412	down		Seita.1G376400	0.0109927	-1.41346	down		Seita.1G286400	7.99118e-11	-2.11305	down		Seita.6G217500	0.0269534	-1.64147	down		Seita.2G016500	0.00132945	1.50955	up		Seita.1G210500	3.43363e-06	2.57914	up
Seita.1G380200	0.000297381	-3.69	down		Seita.2G310900	0.0204302	-2.53554	down		Seita.2G159600	2.96663e-14	Inf	up		Seita.1G250400	0.00951476	1.26433	up		Seita.3G097400	0.0355395	-2.73019	down		Seita.2G000300	2.04302e-12	1.46757	up		Seita.1G286600	1.22545e-13	-1.68916	down		Seita.6G224300	3.63408e-06	-3.53951	down		Seita.2G017000	0.000531209	1.51638	up		Seita.1G211700	9.96952e-07	-1.58042	down
Seita.2G000200	7.58988e-09	-2.96905	down		Seita.2G311200	0.025525	-1.71409	down		Seita.2G160700	0.0281162	1.64918	up		Seita.1G251000	1.12648e-07	1.213	up		Seita.3G097600	0.028916	-1.38498	down		Seita.2G000400	2.11711e-10	-1.53439	down		Seita.1G287600	0.0011307	-1.38626	down		Seita.6G227100	0.0193724	2.58563	up		Seita.2G021700	0.000454392	-2.16952	down		Seita.1G212300	9.53203e-31	7.20161	up
Seita.2G000400	0.0316238	-1.61561	down		Seita.2G311800	0.00078723	-3.67381	down		Seita.2G161000	0.0017469	2.30033	up		Seita.1G251400	0.0257686	1.24095	up		Seita.3G099600	0.0129546	1.52248	up		Seita.2G000900	1.68003e-05	1.03411	up		Seita.1G288000	7.02414e-15	-1.73162	down		Seita.6G236100	0.0173287	1.93589	up		Seita.2G022100	1.76095e-06	2.18801	up		Seita.1G212900	1.26019e-11	-2.72521	down
Seita.2G000800	7.67557e-05	-3.86963	down		Seita.2G312700	0.0175782	-1.83449	down		Seita.2G163700	0.00162418	-1.32776	down		Seita.1G252200	6.59746e-16	4.72214	up		Seita.3G101300	0.0414803	4.33132	up		Seita.2G003500	0.000140255	-2.80649	down		Seita.1G288600	0.0380795	-1.01315	down		Seita.6G237000	0.000109342	3.30972	up		Seita.2G026200	0.0110638	-2.7027	down		Seita.1G213900	0.00028345	-2.10257	down
Seita.2G000900	0.01815	-1.51004	down		Seita.2G320400	0.000208167	-2.97968	down		Seita.2G165000	2.49083e-05	-1.74118	down		Seita.1G252400	1.19745e-10	3.92419	up		Seita.3G101400	0.00464199	-2.55628	down		Seita.2G003600	0.00197563	-1.58087	down		Seita.1G289100	1.43895e-07	-1.54221	down		Seita.6G237500	0.0147024	-1.78633	down		Seita.2G026400	0.00370951	-2.7639	down		Seita.1G214000	0.00586328	1.53248	up
Seita.2G001800	0.0372832	1.92909	up		Seita.2G322900	5.42444e-07	-3.40559	down		Seita.2G166000	3.63596e-05	3.1641	up		Seita.1G253000	2.62672e-13	4.39154	up		Seita.3G102200	0.00078871	2.33187	up		Seita.2G003800	2.91399e-08	3.56559	up		Seita.1G289500	1.70455e-07	-1.61977	down		Seita.6G240600	0.0297874	2.86352	up		Seita.2G026900	0.000125882	-2.15992	down		Seita.1G214100	5.76443e-07	1.32726	up
Seita.2G002700	0.0154608	-1.76928	down		Seita.2G324300	0.0108647	-1.84043	down		Seita.2G167400	0.00197179	1.32151	up		Seita.1G253100	4.29646e-29	-4.10082	down		Seita.3G103300	0.000171966	3.19333	up		Seita.2G004800	0.00591953	-1.18647	down		Seita.1G289700	1.38027e-07	-1.16794	down		Seita.6G249100	0.0189055	3.0588	up		Seita.2G027400	0.000217603	-2.04776	down		Seita.1G215300	2.31816e-05	1.63238	up
Seita.2G003000	4.02234e-26	Inf	up		Seita.2G325500	0.000315424	-2.61202	down		Seita.2G167900	6.05801e-07	2.18061	up		Seita.1G253300	9.36885e-10	-1.80969	down		Seita.3G103800	0.0462395	4.87931	up		Seita.2G005800	0.0460758	-1.23013	down		Seita.1G289800	0.00631833	1.37259	up		Seita.6G250800	0.0057181	-2.10706	down		Seita.2G029600	0.00013282	-1.54034	down		Seita.1G215600	0.00159998	-1.14048	down
Seita.2G003100	0.015854	-1.58666	down		Seita.2G325700	0.00862983	-1.96582	down		Seita.2G168000	1.5389e-09	2.61194	up		Seita.1G253500	1.04049e-34	-3.58587	down		Seita.3G105100	0.00137297	-1.90011	down		Seita.2G005900	4.61359e-12	-2.52762	down		Seita.1G291100	5.52204e-07	-1.14642	down		Seita.7G012000	0.038046	2.86666	up		Seita.2G029900	0.000993335	-1.28171	down		Seita.1G215900	1.00423e-06	2.13443	up
Seita.2G003500	0.0225317	-1.77007	down		Seita.2G327700	0.00266467	-2.24184	down		Seita.2G168200	0.00649357	2.35055	up		Seita.1G253700	1.70136e-12	1.42372	up		Seita.3G109400	1.65008e-05	-2.32118	down		Seita.2G006200	1.55921e-05	-1.48934	down		Seita.1G294000	2.599e-11	1.52823	up		Seita.7G014000	0.00509013	3.51664	up		Seita.2G030900	3.92055e-05	1.45019	up		Seita.1G216100	0.00881445	-1.34562	down
Seita.2G004900	0.00863099	-1.29877	down		Seita.2G332000	4.13836e-05	2.8532	up		Seita.2G170600	0.00387645	3.66689	up		Seita.1G254000	1.12237e-17	-1.77009	down		Seita.3G110100	4.79864e-06	2.57614	up		Seita.2G009400	2.26138e-10	-1.31594	down		Seita.1G294300	1.30139e-43	3.23925	up		Seita.7G014500	1.08217e-05	3.21391	up		Seita.2G031200	5.45861e-14	-1.92384	down		Seita.1G217400	9.92601e-17	-6.13722	down
Seita.2G006600	5.44159e-09	-4.52655	down		Seita.2G333400	9.92553e-09	Inf	up		Seita.2G171600	0.022839	-1.02792	down		Seita.1G255400	7.41259e-06	-1.53122	down		Seita.3G110200	0.000112446	2.84676	up		Seita.2G010100	0.0377239	-1.12378	down		Seita.1G295700	2.15067e-20	-2.89855	down		Seita.7G018900	0.00905322	-1.95219	down		Seita.2G031300	2.12172e-09	-2.43107	down		Seita.1G217900	4.57524e-07	-1.76696	down
Seita.2G007200	0.00392603	-2.25869	down		Seita.2G334400	0.0352194	-2.26305	down		Seita.2G172000	0.00415801	-1.28841	down		Seita.1G255900	0.0387481	-1.02658	down		Seita.3G110600	0.0181296	-1.57678	down		Seita.2G013800	1.84925e-07	1.32955	up		Seita.1G298000	0.000581261	-1.62111	down		Seita.7G020900	0.0413459	-2.3603	down		Seita.2G031800	4.94029e-05	1.032	up		Seita.1G218600	5.4517e-05	-1.21771	down
Seita.2G007800	0.049599	-1.59717	down		Seita.2G335600	0.0358065	2.31924	up		Seita.2G174400	0.0040762	1.98311	up		Seita.1G256100	3.09427e-38	7.22326	up		Seita.3G111800	0.0389813	1.32562	up		Seita.2G013900	2.22174e-07	-2.28036	down		Seita.1G299200	2.79555e-71	-4.37143	down		Seita.7G021400	3.15186e-13	6.52769	up		Seita.2G032400	7.15948e-10	-3.05998	down		Seita.1G220400	2.37174e-17	3.40741	up
Seita.2G010500	0.000410977	-2.59881	down		Seita.2G335900	0.00592956	-2.51625	down		Seita.2G175000	1.66359e-06	2.21776	up		Seita.1G256200	0.000556985	-1.57148	down		Seita.3G112700	0.000308145	-1.99628	down		Seita.2G014200	2.33301e-05	1.53698	up		Seita.1G301000	7.92735e-06	-2.044	down		Seita.7G025900	8.11062e-06	-2.73275	down		Seita.2G035400	0.00303957	2.84967	up		Seita.1G221400	6.36235e-05	-1.07696	down
Seita.2G013600	0.000299166	-2.08723	down		Seita.2G336300	0.000231995	-2.63363	down		Seita.2G177500	1.20188e-34	5.22179	up		Seita.1G256300	5.30333e-24	-2.21508	down		Seita.3G115700	0.00108489	-3.61128	down		Seita.2G015900	2.89014e-07	-3.12463	down		Seita.1G301100	3.0088e-06	-2.09992	down		Seita.7G042800	0.0496083	-3.61881	down		Seita.2G036900	9.00283e-07	-1.23877	down		Seita.1G221600	0.000905359	-3.05827	down
Seita.2G013700	0.000772765	-6.76044	down		Seita.2G337900	0.00384917	-2.07396	down		Seita.2G182000	0.0397675	-1.44397	down		Seita.1G256700	1.21501e-07	-1.25101	down		Seita.3G117600	0.000958998	-6.57965	down		Seita.2G016200	0.000308502	-1.27569	down		Seita.1G302400	0.0107491	-1.30114	down		Seita.7G043100	0.0100161	-1.9955	down		Seita.2G037200	2.4598e-05	-1.11385	down		Seita.1G221800	2.49033e-15	-2.21732	down
Seita.2G014200	7.72507e-11	4.48943	up		Seita.2G338000	0.00425858	3.17176	up		Seita.2G182700	0.00318036	1.85757	up		Seita.1G256800	6.19824e-42	-2.78039	down		Seita.3G117900	0.000192504	-4.30265	down		Seita.2G018700	0.00412106	-1.60834	down		Seita.1G302500	3.71792e-32	-4.00032	down		Seita.7G045100	0.00115388	2.3542	up		Seita.2G038300	0.000244006	2.32732	up		Seita.1G221900	0.00310878	1.71026	up
Seita.2G014800	0.005887	-1.7412	down		Seita.2G342900	0.0376227	1.82836	up		Seita.2G183600	0.00039618	2.60572	up		Seita.1G257500	0.00811227	1.38625	up		Seita.3G118800	9.41566e-05	-2.14411	down		Seita.2G021700	0.000163134	-2.27526	down		Seita.1G302900	8.64336e-17	3.95799	up		Seita.7G056200	0.00145463	2.55639	up		Seita.2G039300	9.13807e-06	1.43414	up		Seita.1G223700	8.58735e-27	-3.56733	down
Seita.2G015200	0.000972239	-2.26297	down		Seita.2G347100	0.0152829	-3.19336	down		Seita.2G183700	0.0467533	3.2569	up		Seita.1G257600	4.59282e-16	-3.1258	down		Seita.3G119400	0.000166393	3.75299	up		Seita.2G022100	1.36135e-18	2.76488	up		Seita.1G303300	7.26783e-06	-2.59775	down		Seita.7G060200	0.015839	3.67553	up		Seita.2G041300	1.48174e-14	4.55088	up		Seita.1G223900	0.000163964	-1.07242	down
Seita.2G015400	0.00307001	-1.43461	down		Seita.2G347700	0.0386183	-1.77671	down		Seita.2G187000	1.06745e-07	4.68074	up		Seita.1G258300	1.10486e-22	2.06734	up		Seita.3G120300	0.00222371	-1.93156	down		Seita.2G023000	0.000590265	-2.03302	down		Seita.1G304200	3.2735e-05	-2.32222	down		Seita.7G073100	5.4693e-09	Inf	up		Seita.2G044400	0.00611004	-1.5593	down		Seita.1G224100	0.000600835	1.01046	up
Seita.2G016600	2.02772e-09	-5.44614	down		Seita.2G349000	0.0247291	-3.95545	down		Seita.2G187200	0.00102463	-1.65742	down		Seita.1G258400	0.00744941	1.54759	up		Seita.3G122700	0.0172154	-3.77566	down		Seita.2G023800	0.0332045	-1.04406	down		Seita.1G304500	0.000415563	-1.51653	down		Seita.7G079300	0.00738331	-1.87198	down		Seita.2G044900	0.00230364	-1.4299	down		Seita.1G224700	5.7484e-07	-1.43709	down
Seita.2G018000	0.00175136	-2.34715	down		Seita.2G351200	0.00480634	-3.37393	down		Seita.2G188200	0.0324892	-1.21662	down		Seita.1G258800	0.01728	-1.33933	down		Seita.3G123200	0.0458393	-1.64793	down		Seita.2G025600	1.76502e-05	-1.17275	down		Seita.1G305400	4.75862e-10	-2.80146	down		Seita.7G080700	0.00759127	-2.0499	down		Seita.2G046000	1.49678e-08	-1.40328	down		Seita.1G225300	0.00442778	-2.89288	down
Seita.2G018200	2.09826e-08	-5.5674	down		Seita.2G352200	0.0183042	1.97397	up		Seita.2G190600	1.09457e-13	-3.1163	down		Seita.1G259100	6.10604e-15	-5.77639	down		Seita.3G123700	0.0458393	-1.26474	down		Seita.2G025800	4.40706e-21	-2.11282	down		Seita.1G307000	3.11891e-18	-2.33358	down		Seita.7G084400	0.0304007	-1.60525	down		Seita.2G046200	7.76924e-06	1.08353	up		Seita.1G226500	0.0308746	-1.24417	down
Seita.2G022100	0.00374419	2.55511	up		Seita.2G352600	2.19544e-05	4.10459	up		Seita.2G191800	0.0432509	1.74984	up		Seita.1G259400	9.00795e-05	-1.96605	down		Seita.3G126900	0.00975535	2.84655	up		Seita.2G026400	2.10501e-06	-3.53463	down		Seita.1G308200	0.00134832	1.02572	up		Seita.7G089000	0.00284495	2.15425	up		Seita.2G047600	2.21041e-05	Inf	up		Seita.1G227000	4.76e-08	-1.48771	down
Seita.2G022600	6.96418e-07	-Inf	down		Seita.2G352700	3.83466e-09	-Inf	down		Seita.2G193000	0.00138448	5.57735	up		Seita.1G259900	5.10178e-09	-3.38137	down		Seita.3G128000	0.00113896	-1.86758	down		Seita.2G026900	1.07532e-06	-2.10846	down		Seita.1G308500	8.96271e-05	-1.74494	down		Seita.7G093400	1.36448e-06	9.74588	up		Seita.2G049000	0.00332723	-1.7354	down		Seita.1G228800	0.00568178	-1.05892	down
Seita.2G023000	0.000550372	-2.16391	down		Seita.2G353400	8.4837e-05	3.00082	up		Seita.2G193200	0.0330687	1.33475	up		Seita.1G260100	0.013883	1.21152	up		Seita.3G129200	0.000387796	-3.94759	down		Seita.2G030900	1.74907e-06	1.41565	up		Seita.1G308900	9.20289e-08	2.39148	up		Seita.7G094200	0.0183802	3.24741	up		Seita.2G050700	5.01742e-05	-5.07266	down		Seita.1G230000	8.18848e-10	-2.62079	down
Seita.2G024600	0.00165804	-4.89783	down		Seita.2G353800	0.0424377	1.67263	up		Seita.2G193400	2.00517e-12	6.37565	up		Seita.1G260700	0.0114278	-3.69368	down		Seita.3G131100	6.51106e-05	2.65295	up		Seita.2G031200	3.83385e-12	-2.24326	down		Seita.1G309600	1.64166e-11	2.2116	up		Seita.7G108900	0.033866	1.60685	up		Seita.2G050800	1.62904e-12	-3.50196	down		Seita.1G231000	0.000462752	3.79544	up
Seita.2G025400	0.0406283	-1.95446	down		Seita.2G354000	0.000722992	4.03729	up		Seita.2G193900	2.42917e-09	2.3299	up		Seita.1G262000	1.13921e-22	-2.16534	down		Seita.3G134100	0.0020524	-2.96999	down		Seita.2G031300	3.16056e-17	-1.96795	down		Seita.1G309800	2.20993e-31	-3.25776	down		Seita.7G115400	0.017882	-3.1338	down		Seita.2G051000	0.00141432	-1.05452	down		Seita.1G231200	0.010061	1.14139	up
Seita.2G025600	0.000264698	-2.77239	down		Seita.2G357200	0.0407437	1.60621	up		Seita.2G194000	2.15884e-07	-2.41832	down		Seita.1G262300	9.09665e-07	-2.75444	down		Seita.3G134200	0.0366367	-1.84221	down		Seita.2G031800	1.98688e-17	1.75326	up		Seita.1G310900	0.000101119	-1.14643	down		Seita.7G118200	0.0212391	-2.81538	down		Seita.2G052500	0.000110836	1.0171	up		Seita.1G232600	0.000123626	-1.07251	down
Seita.2G025700	0.000280074	-2.50784	down		Seita.2G357900	0.000319588	4.53074	up		Seita.2G194200	0.0214961	-1.97208	down		Seita.1G262500	2.51961e-05	-1.43041	down		Seita.3G135800	0.0150409	-4.18595	down		Seita.2G032400	5.08175e-08	-2.98295	down		Seita.1G312200	1.34804e-05	-1.0368	down		Seita.7G121700	6.41038e-13	4.68013	up		Seita.2G052700	1.88468e-12	-2.28749	down		Seita.1G235200	0.0294442	1.23525	up
Seita.2G025800	7.82698e-05	-2.24823	down		Seita.2G365800	0.021687	5.88323	up		Seita.2G198100	0.00156715	1.94287	up		Seita.1G263000	8.91084e-39	5.29022	up		Seita.3G136400	0.000292093	5.09354	up		Seita.2G036400	1.23145e-07	-2.52081	down		Seita.1G312800	0.00108175	-1.37287	down		Seita.7G122900	0.000685198	-2.34666	down		Seita.2G053300	4.51502e-14	3.6665	up		Seita.1G236000	3.69503e-06	-1.59464	down
Seita.2G026700	1.05909e-06	-2.95889	down		Seita.2G367900	0.0414374	-2.40119	down		Seita.2G199500	0.0369716	1.75152	up		Seita.1G263400	1.31425e-15	-2.68357	down		Seita.3G138700	0.00576728	3.04379	up		Seita.2G037100	1.27741e-09	-2.69072	down		Seita.1G312900	1.35657e-06	-1.99812	down		Seita.7G132700	0.00017966	2.39969	up		Seita.2G053400	7.57807e-16	3.86232	up		Seita.1G236400	5.99176e-40	3.91915	up
Seita.2G026900	0.0161353	1.16925	up		Seita.2G368600	0.0261917	3.51867	up		Seita.2G199600	0.0104467	1.57728	up		Seita.1G264400	0.00208369	-1.5114	down		Seita.3G139000	0.00155287	2.02798	up		Seita.2G037200	4.10268e-07	-1.5321	down		Seita.1G313700	1.06034e-08	-1.96374	down		Seita.7G158900	0.0111963	-2.57256	down		Seita.2G053700	1.1891e-10	3.12174	up		Seita.1G237000	1.31906e-08	-2.70774	down
Seita.2G027000	0.00943624	-1.49629	down		Seita.2G371500	0.00952661	-1.95034	down		Seita.2G200100	0.000133822	5.92181	up		Seita.1G264900	2.68571e-09	1.19874	up		Seita.3G140700	0.000603183	2.11811	up		Seita.2G037400	0.0117512	-1.22282	down		Seita.1G314100	1.2341e-06	-1.25846	down		Seita.7G172600	0.0284576	1.82966	up		Seita.2G053800	2.55177e-26	5.58504	up		Seita.1G237200	0.0324756	-1.47205	down
Seita.2G029000	0.00182933	-1.60471	down		Seita.2G371600	0.0268062	-4.06538	down		Seita.2G200200	2.00874e-05	4.49233	up		Seita.1G265100	2.96304e-13	-3.05119	down		Seita.3G142400	0.000466303	3.73544	up		Seita.2G038300	0.00181879	1.50729	up		Seita.1G314500	4.81394e-05	-1.14887	down		Seita.7G184600	0.046532	6.03959	up		Seita.2G057200	7.95961e-06	1.4915	up		Seita.1G239400	1.02764e-12	-3.68849	down
Seita.2G029300	3.14667e-12	-3.48453	down		Seita.2G371800	0.00857468	-3.16102	down		Seita.2G200700	4.07799e-08	-2.43528	down		Seita.1G265400	0.000329305	-1.08327	down		Seita.3G144000	0.00178573	1.94393	up		Seita.2G039300	1.18036e-18	4.58234	up		Seita.1G314800	1.4758e-05	-1.05818	down		Seita.7G216000	0.00543584	-3.78586	down		Seita.2G058300	1.92586e-07	-3.072	down		Seita.1G239600	1.64713e-07	1.39704	up
Seita.2G030500	0.0232325	-1.724	down		Seita.2G374300	0.0139613	-3.74165	down		Seita.2G202200	0.00314568	-1.24449	down		Seita.1G266000	0.00128141	-1.01602	down		Seita.3G145100	0.0440753	1.30423	up		Seita.2G039400	0.000519959	-5.70777	down		Seita.1G315200	2.11812e-06	1.1669	up		Seita.7G221800	0.0182058	-2.52638	down		Seita.2G058500	0.0107271	-1.57634	down		Seita.1G240300	0.00363991	-1.05571	down
Seita.2G030600	1.74997e-05	-3.82368	down		Seita.2G374400	0.00378182	-2.20428	down		Seita.2G204600	0.0200188	-1.78636	down		Seita.1G266100	2.15665e-08	-2.71198	down		Seita.3G147500	6.69576e-08	2.96218	up		Seita.2G040500	0.0127957	-1.1994	down		Seita.1G315300	4.84487e-35	4.50275	up		Seita.7G232500	4.48918e-08	Inf	up		Seita.2G058900	0.0287265	2.10433	up		Seita.1G240500	9.37067e-18	-2.95811	down
Seita.2G033200	0.00926389	-1.33763	down		Seita.2G375000	0.0125085	3.20876	up		Seita.2G205600	0.04612	1.52826	up		Seita.1G266200	0.00131153	-1.34994	down		Seita.3G148700	6.41894e-06	7.07938	up		Seita.2G040600	0.028218	-1.67977	down		Seita.1G316400	0.0107816	-1.00945	down		Seita.7G234500	0.0129855	-1.76837	down		Seita.2G059200	8.11672e-05	1.77507	up		Seita.1G240600	1.23573e-21	-2.80926	down
Seita.2G033500	0.0238268	-1.69621	down		Seita.2G375900	0.011989	-2.36233	down		Seita.2G206200	0.00170803	1.52245	up		Seita.1G266400	0.0259381	2.27925	up		Seita.3G151900	0.00308677	-3.20544	down		Seita.2G043200	0.00849061	1.39028	up		Seita.1G316700	2.47541e-06	-1.09022	down		Seita.7G235100	0.00894661	-1.8921	down		Seita.2G060000	7.62823e-05	-1.00161	down		Seita.1G240800	0.000951644	-1.0217	down
Seita.2G038600	0.000212335	-2.75195	down		Seita.2G379000	0.000470211	-2.87933	down		Seita.2G209000	0.00807751	2.2099	up		Seita.1G267000	1.86975e-33	-7.25427	down		Seita.3G153600	0.00349882	-2.32598	down		Seita.2G044400	0.000602444	-2.03047	down		Seita.1G317100	0.0138153	-1.00628	down		Seita.7G239900	0.00463341	-2.30644	down		Seita.2G061200	3.53707e-05	-1.08035	down		Seita.1G241900	5.36674e-07	-2.94195	down
Seita.2G039200	1.11911e-06	-3.39908	down		Seita.2G379300	0.00884363	-4.56586	down		Seita.2G209100	7.43854e-05	1.81508	up		Seita.1G267100	1.54713e-23	2.11561	up		Seita.3G155400	0.000437199	-3.85583	down		Seita.2G044900	0.000107495	-2.03633	down		Seita.1G318100	0.00386173	-1.34741	down		Seita.7G255200	0.017882	-3.8704	down		Seita.2G061700	1.30356e-05	-1.48314	down		Seita.1G242300	2.11857e-05	-3.27917	down
Seita.2G039800	0.0499511	-1.36125	down		Seita.2G379400	0.0171214	-4.62881	down		Seita.2G209400	0.0378084	-1.46661	down		Seita.1G267200	8.96729e-38	2.62658	up		Seita.3G157100	0.000147477	4.25951	up		Seita.2G045600	1.02414e-05	1.44307	up		Seita.1G319200	7.71227e-16	2.4489	up		Seita.7G256900	0.039662	-5.70227	down		Seita.2G062000	2.89425e-06	1.2188	up		Seita.1G242700	2.67084e-10	2.66171	up
Seita.2G040800	3.72705e-06	-3.62102	down		Seita.2G379500	0.00477122	-2.68452	down		Seita.2G209500	0.0425944	1.75051	up		Seita.1G267400	1.02014e-25	-2.24512	down		Seita.3G158600	0.012141	1.55912	up		Seita.2G046000	1.39439e-06	-1.00462	down		Seita.1G320100	1.20617e-18	-1.95566	down		Seita.7G257800	0.0120993	-2.10348	down		Seita.2G066200	0.0155857	1.47539	up		Seita.1G245200	2.65482e-06	-2.25252	down
Seita.2G041600	2.53499e-11	-3.48851	down		Seita.2G379600	0.00193234	-5.71155	down		Seita.2G209700	0.00429713	-1.26275	down		Seita.1G267500	1.3245e-06	2.44682	up		Seita.3G163200	0.0457247	-1.71941	down		Seita.2G046600	4.41677e-15	1.69983	up		Seita.1G321400	0.00131492	1.37066	up		Seita.7G263500	0.000218727	-2.46487	down		Seita.2G066600	1.65765e-09	-1.54206	down		Seita.1G245500	1.20732e-37	-3.68367	down
Seita.2G041700	0.0389793	-2.22153	down		Seita.2G379700	0.0317165	-4.58237	down		Seita.2G210300	0.00150635	2.57012	up		Seita.1G267800	7.73608e-05	-1.70892	down		Seita.3G163400	0.0163104	1.58922	up		Seita.2G048100	8.15959e-06	-1.45983	down		Seita.1G322900	5.50719e-06	-1.07375	down		Seita.7G263700	0.0496083	-3.34743	down		Seita.2G067900	0.0131448	-1.0363	down		Seita.1G247000	1.65515e-18	-2.4231	down
Seita.2G043500	1.29738e-14	-6.48126	down		Seita.2G379900	0.000686286	-5.65006	down		Seita.2G213700	0.0108232	-2.10264	down		Seita.1G268000	5.55154e-23	2.09481	up		Seita.3G164700	0.000270679	2.45102	up		Seita.2G049000	0.00148102	-1.89498	down		Seita.1G323100	2.38791e-08	1.43751	up		Seita.7G263800	4.43431e-05	-2.66077	down		Seita.2G068100	2.10955e-07	-1.587	down		Seita.1G247100	0.0037191	1.45442	up
Seita.2G043900	2.65777e-21	-5.55045	down		Seita.2G381500	1.68173e-06	10.8659	up		Seita.2G214700	5.32034e-07	-2.08728	down		Seita.1G268200	8.08779e-08	2.07305	up		Seita.3G167200	0.0216191	7.16694	up		Seita.2G050300	4.62663e-05	-1.42986	down		Seita.1G324100	7.54336e-12	-2.56449	down		Seita.7G264000	0.00526983	-1.97162	down		Seita.2G070500	0.000251642	1.17019	up		Seita.1G247200	4.39064e-09	-3.89809	down
Seita.2G044200	2.8487e-11	-4.55559	down		Seita.2G381600	0.0239727	1.75338	up		Seita.2G216500	1.0097e-09	2.53112	up		Seita.1G268300	9.11536e-09	1.54345	up		Seita.3G173400	0.0194318	2.26516	up		Seita.2G050800	1.54687e-07	-2.37754	down		Seita.1G324300	8.62968e-13	1.63526	up		Seita.7G264500	0.0199402	-1.89878	down		Seita.2G078100	1.82515e-06	-2.54148	down		Seita.1G247400	3.5152e-16	-2.75442	down
Seita.2G044900	3.30562e-06	-2.23244	down		Seita.2G381700	0.0260582	2.21844	up		Seita.2G216800	0.0241738	-1.48909	down		Seita.1G268400	0.0028808	1.62172	up		Seita.3G175700	0.00156518	2.43471	up		Seita.2G051000	1.05929e-10	-1.35204	down		Seita.1G325400	4.5541e-09	-1.34268	down		Seita.7G285300	0.0200589	-1.69509	down		Seita.2G081000	3.10004e-36	4.7554	up		Seita.1G248800	0.00393691	-4.98124	down
Seita.2G045200	2.81173e-05	-2.476	down		Seita.2G382900	0.0427114	-3.18434	down		Seita.2G218700	1.08642e-05	3.35919	up		Seita.1G268600	1.89703e-22	-3.0176	down		Seita.3G177600	0.028916	-1.52082	down		Seita.2G051500	0.0135883	2.34219	up		Seita.1G326000	0.000108714	-2.21377	down		Seita.7G302400	0.0303855	-2.65744	down		Seita.2G082400	9.99342e-08	-2.15532	down		Seita.1G249800	0.00616479	-2.17592	down
Seita.2G048800	0.0024145	-4.28795	down		Seita.2G383400	7.61295e-05	-4.60888	down		Seita.2G219700	0.0423783	3.59934	up		Seita.1G268900	6.17859e-10	-2.01293	down		Seita.3G177700	0.0132096	-1.63858	down		Seita.2G053300	5.65039e-15	7.05387	up		Seita.1G326100	0.0034482	-1.22465	down		Seita.7G307300	0.03238	-1.72522	down		Seita.2G085800	0.00136523	-2.11033	down		Seita.1G251000	1.23777e-05	2.5446	up
Seita.2G049800	0.00235246	-3.61117	down		Seita.2G386600	0.035836	1.94671	up		Seita.2G220400	1.1439e-06	2.93945	up		Seita.1G270200	0.00734244	-2.0246	down		Seita.3G180700	0.000170161	-3.71807	down		Seita.2G053400	3.06595e-13	7.76056	up		Seita.1G326200	6.04658e-05	-1.76581	down		Seita.7G310000	0.00102009	-3.39194	down		Seita.2G088200	1.86413e-07	-1.34174	down		Seita.1G252200	3.07341e-13	5.07252	up
Seita.2G050000	7.33201e-07	-3.69951	down		Seita.2G389700	0.0314258	1.66353	up		Seita.2G222900	0.0462359	-1.54279	down		Seita.1G270300	0.0499961	-1.63392	down		Seita.3G181300	0.0324384	-1.95607	down		Seita.2G053700	3.3496e-10	10.2058	up		Seita.1G326900	2.44371e-09	-1.53526	down		Seita.7G311600	0.0060553	-4.17272	down		Seita.2G088600	0.00771798	1.25547	up		Seita.1G252300	5.56517e-07	-1.36468	down
Seita.2G050200	3.38522e-08	-2.49624	down		Seita.2G391600	0.00136205	2.2479	up		Seita.2G224000	0.0320648	-1.01254	down		Seita.1G270500	0.00336442	-1.18959	down		Seita.3G185500	0.0157101	-1.99612	down		Seita.2G053800	2.67484e-13	9.74043	up		Seita.1G327100	0.0446267	-1.02086	down		Seita.7G315700	8.21168e-05	-3.4837	down		Seita.2G090600	0.0200083	1.06962	up		Seita.1G253500	6.71185e-20	-3.27557	down
Seita.2G054900	5.78105e-06	-3.84076	down		Seita.2G396200	0.000532936	-7.02141	down		Seita.2G224300	0.00178122	-1.34629	down		Seita.1G270800	4.94605e-05	-4.31656	down		Seita.3G185600	0.030236	1.33093	up		Seita.2G054600	5.58474e-05	-1.4927	down		Seita.1G327300	3.79522e-08	-2.3914	down		Seita.7G320200	2.18143e-06	2.93694	up		Seita.2G092300	0.000696003	1.60602	up		Seita.1G253700	5.94178e-15	2.2191	up
Seita.2G056500	0.0437355	1.04064	up		Seita.2G397300	0.00783918	-1.91349	down		Seita.2G226300	0.000179911	-3.17032	down		Seita.1G271000	3.56797e-24	-2.49283	down		Seita.3G189100	0.044228	-3.47614	down		Seita.2G058900	0.0122982	1.23119	up		Seita.1G328000	0.00136007	-1.22459	down		Seita.7G324700	0.0279819	-2.80146	down		Seita.2G092400	4.6207e-09	-1.79017	down		Seita.1G254000	4.65475e-05	-1.11752	down
Seita.2G061200	0.00992815	1.34492	up		Seita.2G399100	1.7957e-08	-4.07054	down		Seita.2G228700	0.000542562	3.76996	up		Seita.1G271500	1.13514e-17	2.05188	up		Seita.3G190500	0.0206534	4.35387	up		Seita.2G060000	1.78044e-20	-1.88454	down		Seita.1G329700	0.00199186	1.00015	up		Seita.7G324900	0.0430818	-1.8708	down		Seita.2G092500	9.30633e-05	-2.82847	down		Seita.1G254300	1.53825e-05	-1.98107	down
Seita.2G063300	0.0169431	-2.03996	down		Seita.2G401300	0.016614	-3.68985	down		Seita.2G229000	0.00140396	-1.80665	down		Seita.1G272500	0.00671418	1.36935	up		Seita.3G191900	0.00562749	1.63962	up		Seita.2G061200	1.23649e-06	-1.09634	down		Seita.1G329800	4.9998e-05	-1.93946	down		Seita.7G326600	0.0306522	2.1958	up		Seita.2G092700	3.99264e-12	-3.97404	down		Seita.1G255300	0.0341102	1.17599	up
Seita.2G065300	0.000191434	-1.77984	down		Seita.2G401400	0.035836	-3.52799	down		Seita.2G229100	7.4268e-06	-1.92998	down		Seita.1G272900	9.40077e-43	4.93017	up		Seita.3G192300	0.00816438	1.66352	up		Seita.2G065300	1.12434e-05	-2.07434	down		Seita.1G330300	2.09621e-08	-1.26688	down		Seita.7G326700	0.0492698	-1.51648	down		Seita.2G092900	0.00030313	1.56117	up		Seita.1G256100	4.42332e-25	6.26355	up
Seita.2G067800	7.84541e-06	-2.67132	down		Seita.2G402500	0.0046642	-2.45095	down		Seita.2G229400	0.00667611	-1.33727	down		Seita.1G273300	4.16909e-10	-1.2569	down		Seita.3G193800	5.13134e-05	4.92625	up		Seita.2G066600	1.9635e-08	-1.25877	down		Seita.1G330600	1.71112e-05	2.4439	up		Seita.8G003100	0.00485937	-3.96728	down		Seita.2G093200	0.000196867	2.56248	up		Seita.1G256300	1.26016e-07	-2.07868	down
Seita.2G068200	0.00210729	-2.20376	down		Seita.2G404000	0.0120091	-1.89029	down		Seita.2G229700	7.50248e-06	2.0476	up		Seita.1G273500	5.93914e-07	-Inf	down		Seita.3G195500	1.14296e-06	-2.61345	down		Seita.2G066700	7.38683e-05	-1.10225	down		Seita.1G331300	3.3381e-23	2.20366	up		Seita.8G007100	0.0494251	-2.1172	down		Seita.2G094800	1.67501e-10	-1.88096	down		Seita.1G256800	0.000100048	-2.02278	down
Seita.2G069000	2.61576e-05	-4.81874	down		Seita.2G404100	7.66957e-05	-2.71635	down		Seita.2G230800	0.0198909	1.94005	up		Seita.1G273600	2.43739e-20	-2.00841	down		Seita.3G196300	0.0182098	3.81588	up		Seita.2G068100	5.49498e-06	-1.76883	down		Seita.1G332000	7.11218e-08	-2.58942	down		Seita.8G016400	0.0398762	1.67852	up		Seita.2G095700	0.00221762	-1.53777	down		Seita.1G257300	9.35105e-05	-1.09027	down
Seita.2G069100	0.00354566	-4.29876	down		Seita.2G404500	7.02809e-12	4.91045	up		Seita.2G233300	0.00549216	-1.25249	down		Seita.1G274000	0.000514727	1.23924	up		Seita.3G197200	0.0482758	1.25734	up		Seita.2G068600	1.48289e-17	1.88641	up		Seita.1G332900	0.00556772	-1.09554	down		Seita.8G019100	0.000276406	-2.71502	down		Seita.2G097500	6.15035e-05	-1.62757	down		Seita.1G257600	7.07609e-22	-2.95575	down
Seita.2G069500	0.04757	-1.26843	down		Seita.2G406100	0.0145906	-2.08187	down		Seita.2G233400	5.44552e-05	-1.63376	down		Seita.1G274100	7.62524e-11	1.89674	up		Seita.3G202900	0.00559372	-1.81175	down		Seita.2G069800	0.0171029	1.45141	up		Seita.1G334400	0.0206548	-1.01245	down		Seita.8G019600	0.0177241	-1.77046	down		Seita.2G099400	0.00483026	-1.12521	down		Seita.1G258300	9.64412e-22	2.56348	up
Seita.2G070100	7.84603e-05	-4.04689	down		Seita.2G410300	0.0473091	-1.97981	down		Seita.2G233700	0.000314837	-2.20461	down		Seita.1G274300	0.00023552	1.57909	up		Seita.3G204700	0.00154254	-2.09664	down		Seita.2G075500	1.01921e-05	1.64671	up		Seita.1G334700	5.15858e-13	1.59476	up		Seita.8G019800	0.044179	-2.70546	down		Seita.2G100300	1.12695e-36	-3.68613	down		Seita.1G258400	0.0011453	1.99097	up
Seita.2G070300	0.0203688	-1.51904	down		Seita.2G411400	0.000410398	-3.33725	down		Seita.2G235900	1.09547e-05	-2.04907	down		Seita.1G274400	0.00672261	-1.32675	down		Seita.3G205800	0.0170069	-4.25797	down		Seita.2G078100	2.03889e-05	-2.44765	down		Seita.1G336200	5.63725e-13	2.63377	up		Seita.8G020200	0.00886785	-1.82972	down		Seita.2G100600	3.01771e-05	1.10717	up		Seita.1G259400	1.14698e-08	-2.70047	down
Seita.2G074700	0.00039947	-4.23321	down		Seita.2G412000	0.0094255	-3.18204	down		Seita.2G236000	0.00321795	1.35171	up		Seita.1G274500	1.97232e-18	-1.87004	down		Seita.3G209600	0.0296186	-2.89764	down		Seita.2G079200	6.28005e-07	1.14367	up		Seita.1G336500	0.00927502	1.44948	up		Seita.8G025000	5.72878e-05	-3.77137	down		Seita.2G103600	0.00222873	-1.54552	down		Seita.1G259900	1.48097e-08	-5.31212	down
Seita.2G074800	0.0015799	-4.18034	down		Seita.2G415800	0.0273056	-1.80619	down		Seita.2G236800	1.78308e-05	-1.83373	down		Seita.1G275000	6.42505e-07	-2.53509	down		Seita.3G209800	4.29085e-06	6.65232	up		Seita.2G081000	4.0878e-46	5.13777	up		Seita.1G336900	1.35705e-27	-2.57212	down		Seita.8G030400	6.31826e-06	4.55681	up		Seita.2G104900	0.00140364	-1.47501	down		Seita.1G260700	3.04777e-05	-2.26709	down
Seita.2G074900	6.54943e-09	-4.37289	down		Seita.2G415900	0.0180153	-3.05059	down		Seita.2G236900	4.75555e-06	-1.86009	down		Seita.1G275400	1.38289e-12	4.00927	up		Seita.3G212000	0.0322348	1.72861	up		Seita.2G082400	3.14933e-05	-1.97634	down		Seita.1G339100	1.3933e-13	-2.18124	down		Seita.8G033700	0.00215565	-2.4493	down		Seita.2G105100	0.0383428	1.12946	up		Seita.1G260800	0.0268591	-1.3252	down
Seita.2G075100	3.73588e-06	-4.61497	down		Seita.2G416400	5.47316e-08	Inf	up		Seita.2G237300	3.93503e-05	2.44533	up		Seita.1G276300	1.99767e-19	-4.49343	down		Seita.3G214900	0.0351023	-2.35875	down		Seita.2G082500	5.42093e-09	-1.47833	down		Seita.1G339900	0.0031146	-3.16277	down		Seita.8G034000	0.00189101	-5.24256	down		Seita.2G106400	0.000124757	-1.05505	down		Seita.1G261600	0.00742704	1.27743	up
Seita.2G075300	0.00486387	-3.75448	down		Seita.2G418500	0.00672917	-1.94385	down		Seita.2G239200	0.00399388	-1.22943	down		Seita.1G276500	8.16938e-12	-1.51234	down		Seita.3G216900	8.14009e-05	2.24038	up		Seita.2G085800	2.10441e-05	-2.21146	down		Seita.1G340100	3.16087e-07	-2.30806	down		Seita.8G041800	0.00736386	-3.50006	down		Seita.2G106700	5.75776e-07	-5.64611	down		Seita.1G262300	0.0140242	-1.37232	down
Seita.2G077200	1.14997e-11	-5.32802	down		Seita.2G423200	0.00141299	-4.3449	down		Seita.2G239700	0.0260254	1.06209	up		Seita.1G277900	7.28824e-07	-1.77044	down		Seita.3G218800	1.33433e-05	2.63637	up		Seita.2G086200	0.000578562	-1.33922	down		Seita.1G340400	0.0401978	1.16649	up		Seita.8G053500	0.00298846	-1.99292	down		Seita.2G109200	9.03787e-07	1.4461	up		Seita.1G262500	0.00143061	-1.2004	down
Seita.2G078100	1.11458e-05	-2.76038	down		Seita.2G423300	0.00980425	-2.18117	down		Seita.2G240200	0.0359394	-3.01061	down		Seita.1G278000	1.47845e-12	-1.49214	down		Seita.3G218900	0.000539907	3.59372	up		Seita.2G087900	1.3003e-11	-3.65656	down		Seita.1G341100	8.68536e-05	-2.17414	down		Seita.8G055900	0.000571715	-2.26243	down		Seita.2G112500	2.85606e-10	1.55978	up		Seita.1G263000	6.10826e-30	6.65154	up
Seita.2G079200	0.0215222	1.16993	up		Seita.2G424400	1.54332e-05	-6.29774	down		Seita.2G243900	0.0323771	-2.11303	down		Seita.1G278500	1.92345e-18	1.79297	up		Seita.3G221000	0.0236848	1.97578	up		Seita.2G088200	3.62382e-07	-1.11065	down		Seita.1G342400	5.27431e-11	4.68326	up		Seita.8G056100	0.0013495	-2.62676	down		Seita.2G113700	0.0489823	1.16887	up		Seita.1G263400	2.65491e-11	-2.11528	down
Seita.2G080200	0.000254222	4.56509	up		Seita.2G426400	0.00105157	-2.43788	down		Seita.2G244000	0.00489901	-2.36877	down		Seita.1G278600	1.20102e-07	-1.1364	down		Seita.3G227400	0.00127305	-5.0444	down		Seita.2G088600	1.42739e-07	6.47947	up		Seita.1G344700	0.0048237	1.05643	up		Seita.8G081100	0.00336413	-1.95881	down		Seita.2G115400	5.86971e-05	-1.02151	down		Seita.1G264400	2.1629e-10	-2.31817	down
Seita.2G081000	0.00985081	4.29266	up		Seita.2G429200	0.00367116	-3.03557	down		Seita.2G246900	0.00627661	1.61325	up		Seita.1G279300	0.000210399	-1.72005	down		Seita.3G228600	0.0239856	-1.51469	down		Seita.2G089200	0.0156857	-1.19651	down		Seita.1G344900	0.0100336	-3.40151	down		Seita.8G081300	0.0124998	-3.15133	down		Seita.2G117000	5.15442e-21	-2.7062	down		Seita.1G265100	1.1223e-05	-1.65252	down
Seita.2G086600	0.0105374	-1.35692	down		Seita.2G429900	0.00653394	-3.07293	down		Seita.2G247400	0.0315061	-1.38227	down		Seita.1G280500	9.48537e-05	-1.27074	down		Seita.3G229000	2.20785e-07	-4.27111	down		Seita.2G090000	0.000197795	-1.1367	down		Seita.1G345900	0.000218441	-1.30877	down		Seita.8G082300	0.00137462	-3.51222	down		Seita.2G118100	7.02921e-13	1.81424	up		Seita.1G265400	4.05906e-13	-2.33637	down
Seita.2G090000	0.0128904	1.23745	up		Seita.2G431200	2.33373e-07	-6.68418	down		Seita.2G248100	0.0227407	-1.24223	down		Seita.1G281400	9.96166e-46	-4.94226	down		Seita.3G231400	0.0180081	-1.95432	down		Seita.2G090200	0.0070945	1.60221	up		Seita.1G346700	9.54771e-23	2.74092	up		Seita.8G087900	0.0444325	-1.68442	down		Seita.2G118900	0.00508591	1.59584	up		Seita.1G266100	0.000119068	-1.26621	down
Seita.2G090100	0.000443837	-2.30463	down		Seita.2G431500	0.0242957	-2.60157	down		Seita.2G250300	0.00201095	-1.7429	down		Seita.1G281500	0.00485766	1.17422	up		Seita.3G232500	0.0134626	1.65845	up		Seita.2G091700	0.030401	-1.16753	down		Seita.1G348100	6.33517e-14	4.01663	up		Seita.8G088000	0.00208062	-2.26637	down		Seita.2G119000	1.54522e-10	3.8454	up		Seita.1G266400	0.00570732	1.71265	up
Seita.2G090300	0.0436123	-1.07811	down		Seita.2G434400	0.00980425	2.29963	up		Seita.2G251100	0.00625618	-1.17408	down		Seita.1G282400	1.08659e-64	-5.23162	down		Seita.3G233100	0.018051	-2.53386	down		Seita.2G092300	4.22838e-21	2.00328	up		Seita.1G348800	0.000370778	-1.25504	down		Seita.8G090100	0.0156008	-1.85691	down		Seita.2G122700	2.78526e-07	-Inf	down		Seita.1G266800	0.00733201	-1.07453	down
Seita.2G092300	2.46719e-07	2.32545	up		Seita.2G435200	0.00283733	-3.31151	down		Seita.2G251700	0.00250771	-2.03172	down		Seita.1G282900	0.0024718	-1.43657	down		Seita.3G235200	0.000560842	-2.92787	down		Seita.2G092400	0.000218999	-1.46854	down		Seita.1G349400	0.0146504	-1.11546	down		Seita.8G091900	0.0356095	-1.57133	down		Seita.2G127100	0.0402603	-1.06861	down		Seita.1G267000	9.78695e-56	-4.68409	down
Seita.2G093000	0.000374101	-2.11248	down		Seita.2G436200	0.042523	-1.9631	down		Seita.2G252300	0.0140579	1.01987	up		Seita.1G284000	0.0285938	1.24157	up		Seita.3G235400	1.1972e-05	-2.48639	down		Seita.2G093000	3.59134e-09	-1.31858	down		Seita.1G352100	4.43258e-05	-1.49565	down		Seita.8G101900	0.000869691	-5.43597	down		Seita.2G128600	0.0410989	3.32171	up		Seita.1G267100	4.21319e-19	2.37168	up
Seita.2G093500	0.000366924	-2.66346	down		Seita.2G437500	0.0281561	-1.8486	down		Seita.2G253500	0.0241738	1.30411	up		Seita.1G284100	2.0269e-32	-2.71294	down		Seita.3G243200	0.0110383	-1.62193	down		Seita.2G093200	1.98545e-06	1.4823	up		Seita.1G352600	1.37658e-07	1.17291	up		Seita.8G106400	9.9332e-11	-5.00465	down		Seita.2G128900	0.0068262	-1.05085	down		Seita.1G267200	4.7812e-12	2.717	up
Seita.2G095400	9.36124e-10	2.84035	up		Seita.2G437900	2.04656e-20	9.9309	up		Seita.2G253700	4.90332e-06	2.07858	up		Seita.1G284200	0.0432861	-2.71491	down		Seita.3G244300	0.00656377	4.13257	up		Seita.2G094000	1.21768e-34	-2.54609	down		Seita.1G352900	0.0103567	-1.39207	down		Seita.8G115400	1.05829e-07	8.00004	up		Seita.2G129000	0.0175402	-1.09336	down		Seita.1G267400	8.3134e-17	-2.40556	down
Seita.2G097900	0.00240186	-2.77699	down		Seita.2G438500	0.016894	5.84052	up		Seita.2G255100	0.0332746	1.14288	up		Seita.1G284300	5.79436e-18	-2.70129	down		Seita.3G245200	0.0128573	-2.27953	down		Seita.2G094800	1.66883e-08	-1.215	down		Seita.1G353500	2.60451e-16	1.82894	up		Seita.8G118200	8.28537e-05	5.20248	up		Seita.2G129800	0.000106442	1.04977	up		Seita.1G267500	0.0113507	1.44996	up
Seita.2G102800	0.000730234	-3.99615	down		Seita.2G439000	0.0206962	-1.97931	down		Seita.2G256100	4.56236e-08	-2.21755	down		Seita.1G284600	0.00358654	-2.06356	down		Seita.3G246300	0.0363316	1.52793	up		Seita.2G095400	1.79281e-05	-1.6948	down		Seita.1G354100	0.00233947	-1.14299	down		Seita.8G122900	0.0185276	-1.73479	down		Seita.2G129900	0.000596353	2.07783	up		Seita.1G267900	7.26497e-07	1.33424	up
Seita.2G103600	4.76944e-10	-3.09501	down		Seita.2G439100	0.00621836	-2.96381	down		Seita.2G256500	0.0138394	-1.14426	down		Seita.1G284800	2.62927e-05	-2.22885	down		Seita.3G249700	0.0129786	-1.60075	down		Seita.2G097400	3.18856e-23	-2.39219	down		Seita.1G354600	0.00351192	1.49326	up		Seita.8G124200	0.00207803	6.73554	up		Seita.2G130600	0.0404504	1.28683	up		Seita.1G268000	9.58777e-06	1.19912	up
Seita.2G104100	0.0184526	1.30667	up		Seita.2G439200	0.0424377	-1.55169	down		Seita.2G256700	0.00943581	-1.99826	down		Seita.1G285000	0.0137675	1.34454	up		Seita.3G250100	0.00186002	-3.47431	down		Seita.2G097500	4.82862e-47	-3.12963	down		Seita.1G357500	1.57334e-17	-2.40834	down		Seita.8G125000	0.000742731	-3.69635	down		Seita.2G131500	0.000265447	1.2825	up		Seita.1G268200	0.0318156	1.30494	up
Seita.2G104900	0.0205333	1.81983	up		Seita.2G441900	0.00632822	2.629	up		Seita.2G258900	0.000810872	2.32024	up		Seita.1G285500	0.00351874	-1.2504	down		Seita.3G254300	0.0119131	-1.98416	down		Seita.2G098100	4.83075e-28	-Inf	down		Seita.1G357600	5.35359e-09	-1.39733	down		Seita.8G136400	0.0108486	2.30663	up		Seita.2G132600	2.80731e-05	-1.06683	down		Seita.1G268300	0.000114227	1.2419	up
Seita.2G106200	5.55138e-07	-2.76943	down		Seita.2G442200	0.0229471	-1.72909	down		Seita.2G260500	2.29067e-05	3.87881	up		Seita.1G286400	0.0129951	-1.07548	down		Seita.3G255900	0.00658404	-3.07502	down		Seita.2G099600	4.44074e-06	2.4165	up		Seita.1G357900	2.024e-06	1.08553	up		Seita.8G167700	0.000144753	2.44427	up		Seita.2G134000	7.14377e-06	-5.59321	down		Seita.1G268600	0.000302328	-1.71159	down
Seita.2G106300	0.00832943	-1.82948	down		Seita.2G444300	0.0416252	1.5551	up		Seita.2G261100	0.0179562	-1.05295	down		Seita.1G286600	4.13608e-09	-1.69368	down		Seita.3G262400	0.000235964	-3.13787	down		Seita.2G100300	2.80441e-16	-6.52281	down		Seita.1G359100	0.000255429	-3.29855	down		Seita.8G167800	6.41038e-13	-Inf	down		Seita.2G141500	9.38932e-80	6.30941	up		Seita.1G268900	9.07931e-13	-2.12296	down
Seita.2G106500	3.16503e-22	-8.28648	down		Seita.2G445000	0.000272645	2.69559	up		Seita.2G262300	0.0452618	1.7267	up		Seita.1G286900	0.0289863	1.55776	up		Seita.3G263800	0.00113125	-3.97179	down		Seita.2G104900	9.8561e-20	-1.86318	down		Seita.1G360500	0.00234247	1.66615	up		Seita.8G194200	0.0426054	-1.66786	down		Seita.2G141700	0.000121209	-1.02241	down		Seita.1G270200	0.00142948	-2.80873	down
Seita.2G108800	0.00208607	2.2813	up		Seita.3G003200	0.00773406	-2.06799	down		Seita.2G262500	6.98489e-05	2.42205	up		Seita.1G288000	6.16607e-35	-2.7403	down		Seita.3G264300	0.010232	4.62603	up		Seita.2G106800	8.46449e-19	-3.66093	down		Seita.1G362600	4.83544e-08	1.32095	up		Seita.8G201300	0.00735657	-1.85943	down		Seita.2G142500	8.13851e-16	2.04465	up		Seita.1G270500	1.60977e-05	-1.63596	down
Seita.2G108900	8.93412e-17	-4.92683	down		Seita.3G003700	0.026397	4.29343	up		Seita.2G263000	6.46924e-07	-2.47019	down		Seita.1G288600	9.33756e-07	-2.87973	down		Seita.3G266300	0.02695	-1.3572	down		Seita.2G110300	1.9215e-06	-1.85872	down		Seita.1G363300	0.00111357	1.20361	up		Seita.8G201400	8.04869e-13	-5.41531	down		Seita.2G144900	0.00837417	-1.3433	down		Seita.1G270800	0.00553034	-2.22064	down
Seita.2G109800	0.000912659	2.45323	up		Seita.3G004500	0.0346147	-1.71176	down		Seita.2G263800	2.34307e-10	-6.79549	down		Seita.1G289100	4.25448e-07	-1.48671	down		Seita.3G269200	0.0490832	1.60138	up		Seita.2G112100	0.0273485	-1.13936	down		Seita.1G364800	0.0436451	1.57592	up		Seita.8G202100	0.00104161	-2.17252	down		Seita.2G145400	4.52648e-05	-1.27426	down		Seita.1G271000	0.0197604	-1.06856	down
Seita.2G110300	0.0457506	-1.06806	down		Seita.3G008200	0.00380047	-3.33285	down		Seita.2G265400	0.0296397	-1.07881	down		Seita.1G289400	0.000188273	-1.15194	down		Seita.3G270200	0.0263632	2.4604	up		Seita.2G112500	5.46029e-35	3.58348	up		Seita.1G367700	8.16994e-12	-2.2032	down		Seita.8G215100	0.00143735	-5.0933	down		Seita.2G145900	0.000258334	-1.21432	down		Seita.1G271500	9.28506e-35	3.92101	up
Seita.2G112100	7.05546e-05	-3.45599	down		Seita.3G010000	0.000324523	3.25379	up		Seita.2G265500	0.0302169	-1.13797	down		Seita.1G289700	2.20207e-11	-1.38334	down		Seita.3G270300	0.0143742	-2.07584	down		Seita.2G113700	0.0202699	1.11571	up		Seita.1G369100	0.0139359	-1.46106	down		Seita.8G217900	0.0105954	-1.9737	down		Seita.2G146000	1.60399e-06	-2.89109	down		Seita.1G272200	9.09399e-08	-3.15817	down
Seita.2G112200	0.0330845	-1.43767	down		Seita.3G011900	0.0184391	-1.86388	down		Seita.2G266700	0.033677	1.07358	up		Seita.1G290200	2.21777e-35	-3.7187	down		Seita.3G270500	0.000447932	-1.93738	down		Seita.2G116100	0.00124882	1.59135	up		Seita.1G369200	2.89596e-11	1.5373	up		Seita.8G230000	0.0413459	-2.83768	down		Seita.2G147100	3.25591e-07	-1.27705	down		Seita.1G272600	0.00137159	-1.04866	down
Seita.2G113100	2.57466e-06	-3.43541	down		Seita.3G013100	2.20438e-10	-4.46443	down		Seita.2G266800	2.01227e-05	2.05512	up		Seita.1G291400	5.91004e-07	-1.08051	down		Seita.3G271300	0.00160298	-4.95244	down		Seita.2G117000	5.34484e-14	-1.8735	down		Seita.1G369300	5.63725e-13	1.78442	up		Seita.9G007200	0.0485175	-2.70254	down		Seita.2G147500	0.00935275	-1.09977	down		Seita.1G272700	0.0040855	-1.16305	down
Seita.2G114300	0.00701126	-3.95076	down		Seita.3G014000	0.00972766	3.61228	up		Seita.2G270400	0.0264942	-1.07113	down		Seita.1G292500	9.95368e-06	-1.39201	down		Seita.3G274100	0.00975535	-2.24036	down		Seita.2G119000	9.34925e-12	3.86774	up		Seita.1G370000	4.73043e-05	1.04563	up		Seita.9G007500	0.00489761	-1.94224	down		Seita.2G147800	1.61545e-05	-1.29547	down		Seita.1G272900	2.82907e-58	5.11804	up
Seita.2G115100	0.0244809	3.34839	up		Seita.3G014100	0.00751242	2.73584	up		Seita.2G271100	0.00300648	-2.20206	down		Seita.1G293800	5.61762e-19	6.29329	up		Seita.3G279900	0.0142934	-1.92461	down		Seita.2G123000	5.43794e-08	1.16578	up		Seita.1G370300	0.000131291	-1.618	down		Seita.9G021200	0.0079089	-2.63114	down		Seita.2G149000	0.0289792	1.12621	up		Seita.1G273500	0.000166279	-2.19068	down
Seita.2G115300	0.0465033	-1.59033	down		Seita.3G014900	0.0470012	-2.20424	down		Seita.2G273900	0.0172473	2.79195	up		Seita.1G294000	7.55459e-24	2.33093	up		Seita.3G289200	0.00570345	1.95343	up		Seita.2G123200	6.11034e-05	-1.28862	down		Seita.1G371900	1.00153e-20	-2.54554	down		Seita.9G034000	1.658e-06	5.91559	up		Seita.2G150900	8.32836e-07	-1.71862	down		Seita.1G273600	0.00231268	-1.82517	down
Seita.2G116100	0.0166647	-1.83249	down		Seita.3G016000	0.0261489	-5.02964	down		Seita.2G275200	0.00769473	-1.40258	down		Seita.1G294300	9.98612e-16	1.82001	up		Seita.3G294500	0.0254586	-1.41546	down		Seita.2G123300	3.2167e-05	2.19236	up		Seita.1G372100	1.77461e-16	-1.86114	down		Seita.9G039200	6.45859e-08	4.00104	up		Seita.2G151800	2.20984e-23	2.4135	up		Seita.1G274000	0.0061412	2.46313	up
Seita.2G119600	0.0174226	1.903	up		Seita.3G016400	0.00829763	-1.96082	down		Seita.2G275500	1.83221e-21	-5.22809	down		Seita.1G294600	0.000221811	-1.30715	down		Seita.3G294700	0.00832649	-4.06031	down		Seita.2G124600	0.0223699	2.58992	up		Seita.1G373300	4.70573e-14	-3.46563	down		Seita.9G043000	0.000151095	4.14141	up		Seita.2G154700	3.966e-07	-3.95954	down		Seita.1G274100	0.000596057	4.37963	up
Seita.2G120000	0.0269482	-1.2388	down		Seita.3G018200	0.004156	-2.59113	down		Seita.2G275600	4.69871e-26	-4.45395	down		Seita.1G294800	6.49774e-06	-1.00114	down		Seita.3G299000	0.0215259	2.07828	up		Seita.2G126200	1.685e-05	1.49088	up		Seita.1G373600	4.84487e-35	2.78257	up		Seita.9G056300	0.0100797	2.55289	up		Seita.2G156600	0.00767119	-1.86023	down		Seita.1G274300	0.00712088	2.46275	up
Seita.2G122700	0.00772332	-2.40269	down		Seita.3G019100	0.0356785	-1.58279	down		Seita.2G276000	6.06051e-08	-4.73625	down		Seita.1G295700	5.54624e-25	-4.4484	down		Seita.3G299800	0.036694	-2.32908	down		Seita.2G127100	0.00311149	-1.30412	down		Seita.1G373700	0.000700365	1.86117	up		Seita.9G057000	2.40795e-05	-2.88429	down		Seita.2G157100	0.0143839	-1.45011	down		Seita.1G274400	0.0175809	-1.19237	down
Seita.2G123200	3.47492e-06	-3.14379	down		Seita.3G020300	0.0315632	1.68613	up		Seita.2G276500	1.06334e-06	-2.87415	down		Seita.1G295900	2.73711e-12	-1.58284	down		Seita.3G300200	0.0351722	-2.33002	down		Seita.2G127400	7.42627e-05	1.27673	up		Seita.1G375700	1.96718e-25	2.51288	up		Seita.9G061600	5.15298e-09	9.72211	up		Seita.2G157500	9.90393e-06	-3.97764	down		Seita.1G274500	5.73045e-11	-1.73294	down
Seita.2G123300	5.49619e-07	-3.37258	down		Seita.3G022000	0.0495765	-1.93223	down		Seita.2G280000	0.0131059	2.16139	up		Seita.1G296400	0.0138219	4.22773	up		Seita.3G306400	0.0429683	-3.38608	down		Seita.2G128500	4.25033e-18	-Inf	down		Seita.1G375800	2.14584e-12	1.59067	up		Seita.9G092000	0.0110376	-1.79424	down		Seita.2G158100	1.65896e-14	-1.95711	down		Seita.1G275000	5.47424e-09	-2.18961	down
Seita.2G125300	0.0302959	1.09713	up		Seita.3G024000	0.0306678	-1.96247	down		Seita.2G280100	0.0406237	3.26777	up		Seita.1G298000	5.46785e-07	-2.13026	down		Seita.3G315800	0.000637873	-3.78921	down		Seita.2G128600	1.01883e-09	2.8327	up		Seita.1G378600	0.00217926	-1.55135	down		Seita.9G107800	0.0125034	2.9989	up		Seita.2G158200	7.17969e-05	-2.27102	down		Seita.1G275400	0.0415788	1.26235	up
Seita.2G126200	0.00121936	-2.19675	down		Seita.3G025000	0.0165241	-2.23708	down		Seita.2G280200	0.000100584	3.3577	up		Seita.1G299200	4.56978e-78	-6.42818	down		Seita.3G319400	0.00533136	-1.81816	down		Seita.2G128900	5.83483e-31	-2.76166	down		Seita.2G000200	4.7289e-22	-2.60242	down		Seita.9G109900	0.0239565	-1.87065	down		Seita.2G159000	3.87341e-17	2.18708	up		Seita.1G275900	0.00390362	1.75589	up
Seita.2G127900	0.00368978	1.35184	up		Seita.3G032600	0.0029418	-4.16098	down		Seita.2G282600	1.62729e-30	-5.18377	down		Seita.1G300600	5.38762e-07	-1.04708	down		Seita.3G320700	4.76101e-07	2.52599	up		Seita.2G129800	1.09264e-10	1.45578	up		Seita.2G001400	0.0284474	-1.08581	down		Seita.9G112100	4.11975e-09	5.13768	up		Seita.2G159500	0.000494506	-1.10556	down		Seita.1G276300	6.75777e-14	-3.63409	down
Seita.2G132800	0.000541677	-6.1128	down		Seita.3G035800	0.043784	1.78485	up		Seita.2G282700	0.0499716	-1.45644	down		Seita.1G302500	1.59168e-52	-7.07325	down		Seita.3G326100	0.0138353	-4.07215	down		Seita.2G130600	0.0266288	3.97945	up		Seita.2G002700	6.39195e-05	-1.59245	down		Seita.9G113000	0.0213469	-1.68611	down		Seita.2G159700	0.0203108	-1.31514	down		Seita.1G276400	8.5796e-05	-1.07625	down
Seita.2G133200	2.72495e-07	-2.82731	down		Seita.3G036400	0.00316199	8.09728	up		Seita.2G282900	5.91194e-05	-1.60482	down		Seita.1G302900	1.71741e-12	4.28774	up		Seita.3G326200	4.95034e-11	-3.86381	down		Seita.2G131500	4.19575e-05	1.3823	up		Seita.2G003100	8.18983e-07	-1.91154	down		Seita.9G114100	0.00077603	2.20118	up		Seita.2G163700	1.9328e-17	-2.08577	down		Seita.1G276600	0.00357969	-1.0745	down
Seita.2G133900	1.62072e-16	-6.81904	down		Seita.3G036600	0.0409131	1.81877	up		Seita.2G283000	0.00200938	-1.35692	down		Seita.1G303300	0.00593803	-2.55166	down		Seita.3G327700	0.0272119	1.70424	up		Seita.2G132500	8.90258e-16	1.70959	up		Seita.2G006600	1.99473e-07	-3.17471	down		Seita.9G114600	0.0233098	-1.63854	down		Seita.2G164800	0.000203963	-1.07628	down		Seita.1G277300	2.00608e-13	-2.07797	down
Seita.2G134000	4.97434e-11	-7.04338	down		Seita.3G037000	0.00641516	-1.96636	down		Seita.2G283500	0.0163747	1.38578	up		Seita.1G303900	0.00902281	-1.04694	down		Seita.3G328300	0.0184417	-2.26022	down		Seita.2G133000	5.45667e-07	2.24247	up		Seita.2G007000	0.000256804	-1.862	down		Seita.9G117400	0.0118542	-1.84696	down		Seita.2G165000	1.60298e-17	-2.14726	down		Seita.1G277500	0.000257361	2.18769	up
Seita.2G135400	7.51643e-05	-2.36039	down		Seita.3G039200	0.0403706	1.57925	up		Seita.2G284000	2.90973e-05	1.72533	up		Seita.1G304200	0.000308574	-2.05185	down		Seita.3G333100	0.0272522	-2.63674	down		Seita.2G133500	0.0459152	1.01505	up		Seita.2G007300	0.0024452	-1.17074	down		Seita.9G120700	0.017882	2.81122	up		Seita.2G165800	7.01114e-05	-2.71376	down		Seita.1G277900	4.86632e-07	-2.02182	down
Seita.2G136700	0.020944	4.27586	up		Seita.3G039700	0.00706397	-2.06974	down		Seita.2G284500	0.0121018	-1.37749	down		Seita.1G304800	1.73546e-06	-1.8398	down		Seita.3G335500	0.0193853	-4.03359	down		Seita.2G134000	7.03105e-25	-8.01144	down		Seita.2G008100	0.00204857	1.18332	up		Seita.9G127100	0.000151733	2.86746	up		Seita.2G166000	0.0378413	1.20856	up		Seita.1G278000	0.000312695	-1.27658	down
Seita.2G138200	0.0149302	-1.79904	down		Seita.3G040800	0.0205439	-2.86943	down		Seita.2G284800	0.0246955	1.95825	up		Seita.1G305400	5.84084e-07	-2.98128	down		Seita.3G337900	0.0251147	-4.98387	down		Seita.2G134700	1.79173e-08	1.20033	up		Seita.2G008800	0.0389745	-1.06027	down		Seita.9G134900	0.000480475	2.26743	up		Seita.2G166200	0.000175828	-1.91298	down		Seita.1G278600	6.85538e-05	-1.07353	down
Seita.2G138400	6.89671e-08	-2.40654	down		Seita.3G044100	0.00210728	3.70582	up		Seita.2G285600	0.0026627	1.38169	up		Seita.1G307000	1.89371e-11	-1.6276	down		Seita.3G338400	0.0191289	-1.47787	down		Seita.2G136600	1.43315e-09	-2.96547	down		Seita.2G009000	3.56157e-10	-2.39872	down		Seita.9G136000	0.00183281	-4.0114	down		Seita.2G166700	0.000461773	1.12164	up		Seita.1G280200	7.13008e-05	-1.68213	down
Seita.2G139700	0.000445521	-1.66897	down		Seita.3G044200	0.0231609	-1.72707	down		Seita.2G286300	0.0050875	-1.27209	down		Seita.1G308500	0.00016922	-2.06082	down		Seita.3G339800	0.00616717	3.26785	up		Seita.2G137300	3.3554e-05	-1.23253	down		Seita.2G011500	0.000538504	1.0652	up		Seita.9G141400	0.0277878	-2.85556	down		Seita.2G167400	1.05441e-05	1.3022	up		Seita.1G281400	9.01732e-62	-5.56639	down
Seita.2G141500	1.37767e-10	3.37118	up		Seita.3G044600	0.0208456	-1.73647	down		Seita.2G288900	0.0295005	-1.49205	down		Seita.1G308900	1.63578e-11	3.06882	up		Seita.3G343100	0.0381257	-2.24905	down		Seita.2G138400	6.89255e-10	-3.33615	down		Seita.2G013400	0.000316255	-1.27076	down		Seita.9G142100	0.043984	-1.67807	down		Seita.2G167900	1.68354e-12	2.16063	up		Seita.1G282100	0.0329157	1.27136	up
Seita.2G144400	2.69409e-09	-3.9184	down		Seita.3G046000	0.00149502	-2.75567	down		Seita.2G289500	0.00131055	-1.89171	down		Seita.1G309100	8.27422e-05	-1.49321	down		Seita.3G347500	3.1911e-07	-3.12948	down		Seita.2G140600	0.000192194	-1.46124	down		Seita.2G013600	0.00807695	-1.67207	down		Seita.9G142600	0.0488877	-4.42469	down		Seita.2G168000	5.73407e-23	2.92933	up		Seita.1G282300	0.0136275	1.23375	up
Seita.2G144900	2.41793e-10	-4.7265	down		Seita.3G046100	0.0099287	-2.10972	down		Seita.2G290300	6.62525e-16	4.19962	up		Seita.1G309600	6.59389e-09	2.12262	up		Seita.3G352100	0.017092	2.10936	up		Seita.2G141500	6.93728e-119	6.20182	up		Seita.2G013700	3.86065e-07	-2.88046	down		Seita.9G143300	0.00304762	-2.17176	down		Seita.2G169400	0.00352554	1.12266	up		Seita.1G282400	1.75156e-53	-4.52627	down
Seita.2G145700	2.45537e-07	-4.79783	down		Seita.3G047600	0.0322121	-1.63561	down		Seita.2G291500	5.99975e-06	1.88155	up		Seita.1G309800	7.70209e-17	-5.19351	down		Seita.3G352300	8.14009e-05	-3.40281	down		Seita.2G142500	1.13173e-08	1.17905	up		Seita.2G014200	1.14748e-33	6.75793	up		Seita.9G148700	0.0415107	-2.15257	down		Seita.2G169600	9.66045e-07	2.45503	up		Seita.1G283000	0.00916523	1.06652	up
Seita.2G145800	8.59713e-11	-4.47339	down		Seita.3G047800	0.0160059	1.83893	up		Seita.2G292400	0.00270654	1.22363	up		Seita.1G310800	8.7833e-11	-1.30551	down		Seita.3G357700	8.12831e-06	3.23098	up		Seita.2G145900	1.13819e-15	-1.67416	down		Seita.2G015400	1.10566e-10	-1.54971	down		Seita.9G156500	0.00931074	3.53092	up		Seita.2G169700	7.18407e-08	1.36642	up		Seita.1G283900	9.51113e-05	2.03845	up
Seita.2G145900	0.000262793	-3.04509	down		Seita.3G053000	8.96459e-05	-4.52856	down		Seita.2G293100	0.0139704	-1.4977	down		Seita.1G310900	3.06343e-08	-2.22486	down		Seita.3G366000	0.0367512	-2.54142	down		Seita.2G146000	3.86517e-07	-3.65982	down		Seita.2G015900	0.0361017	-1.0996	down		Seita.9G165600	0.0013547	-4.11861	down		Seita.2G172500	1.13641e-05	1.80298	up		Seita.1G284000	0.0302283	1.4484	up
Seita.2G147600	0.0115157	-1.27301	down		Seita.3G054100	0.00884363	-2.49981	down		Seita.2G298200	0.0344016	1.72835	up		Seita.1G311700	2.03798e-06	-1.02321	down		Seita.3G368700	0.00298278	1.69618	up		Seita.2G147000	0.000207452	-1.8651	down		Seita.2G016600	3.52251e-05	-2.2396	down		Seita.9G170000	0.00232384	-4.94472	down		Seita.2G174400	0.0208959	1.05285	up		Seita.1G284100	2.04867e-15	-2.09914	down
Seita.2G148000	0.00647683	1.67703	up		Seita.3G054600	0.00238132	-3.44887	down		Seita.2G298700	1.86582e-05	-1.77973	down		Seita.1G312600	6.16503e-12	-2.05016	down		Seita.3G369800	0.00874951	1.80935	up		Seita.2G147100	1.43037e-12	-1.4396	down		Seita.2G017400	4.74163e-05	-2.45877	down		Seita.9G173100	0.00681413	-2.57814	down		Seita.2G176500	0.000137944	1.26688	up		Seita.1G284200	6.33536e-06	-6.28817	down
Seita.2G150000	0.0434748	-1.02414	down		Seita.3G055800	0.0188734	-2.54595	down		Seita.2G299900	0.000873651	-2.46951	down		Seita.1G312800	5.75565e-09	-2.52747	down		Seita.3G372000	0.0206469	-1.55539	down		Seita.2G148000	2.79091e-07	2.34066	up		Seita.2G017800	2.65938e-08	-3.41293	down		Seita.9G187000	0.0173424	-2.30787	down		Seita.2G177500	3.02778e-30	5.05661	up		Seita.1G284300	2.87227e-16	-2.61417	down
Seita.2G151100	5.44538e-13	-3.55468	down		Seita.3G056300	0.000182715	8.11736	up		Seita.2G300300	0.00999572	2.35539	up		Seita.1G312900	4.46156e-18	-2.77943	down		Seita.3G373100	2.58883e-09	3.25574	up		Seita.2G149000	0.000199847	1.52911	up		Seita.2G018200	3.92751e-17	-4.19911	down		Seita.9G187200	0.0245491	-3.49434	down		Seita.2G178200	3.63006e-10	-1.56853	down		Seita.1G284400	0.000208159	-1.15237	down
Seita.2G156100	0.000100958	-4.70773	down		Seita.3G060900	0.0215745	-1.96258	down		Seita.2G301400	6.21242e-09	2.36037	up		Seita.1G313500	2.38755e-06	-2.79165	down		Seita.3G374000	0.0435487	-1.57285	down		Seita.2G151000	2.20979e-05	-1.97136	down		Seita.2G018300	0.0369152	-1.48352	down		Seita.9G193600	0.0330504	-1.60806	down		Seita.2G179500	0.000466979	1.37984	up		Seita.1G284600	1.63337e-06	-2.30514	down
Seita.2G156200	0.0233667	-1.37766	down		Seita.3G063200	0.0102557	-1.94115	down		Seita.2G301900	5.18912e-06	1.79441	up		Seita.1G313600	6.97548e-05	-3.48329	down		Seita.3G376500	1.07178e-05	-2.44727	down		Seita.2G151800	9.81321e-27	2.18765	up		Seita.2G022100	2.12194e-06	1.3811	up		Seita.9G198800	0.0494468	7.64768	up		Seita.2G179800	0.00610997	1.68669	up		Seita.1G284800	9.55526e-06	-1.63215	down
Seita.2G157400	1.34882e-06	-3.29052	down		Seita.3G063900	0.0231051	-4.38742	down		Seita.2G302100	0.0413406	4.64386	up		Seita.1G313700	4.4411e-12	-2.03215	down		Seita.3G379200	0.017743	-3.09626	down		Seita.2G154700	5.23762e-12	-3.73712	down		Seita.2G023200	0.00088016	1.93344	up		Seita.9G200700	0.000214916	-2.75013	down		Seita.2G180200	5.61261e-05	-2.02031	down		Seita.1G285000	0.00129138	1.82353	up
Seita.2G158000	0.0369595	-1.22569	down		Seita.3G066900	0.0268062	1.69812	up		Seita.2G302900	4.5841e-06	3.41597	up		Seita.1G314100	1.61081e-52	-3.18155	down		Seita.3G379400	0.00701506	-2.51792	down		Seita.2G155900	7.67948e-07	1.08044	up		Seita.2G023400	0.0399211	1.02185	up		Seita.9G208200	0.000742731	3.32145	up		Seita.2G181000	0.0295713	1.40036	up		Seita.1G286400	0.0334695	-1.06674	down
Seita.2G159400	6.76032e-12	-5.61398	down		Seita.3G067200	2.97631e-05	-2.79284	down		Seita.2G304400	0.000998795	1.43423	up		Seita.1G314500	6.96169e-21	-2.81307	down		Seita.3G381300	2.40506e-05	-2.50582	down		Seita.2G157100	0.00716168	-1.44717	down		Seita.2G023800	9.2053e-09	-2.63461	down		Seita.9G224400	0.0184306	-1.8439	down		Seita.2G181500	1.43501e-05	1.10397	up		Seita.1G286500	1.1948e-06	-1.30079	down
Seita.2G159600	0.0216747	4.92103	up		Seita.3G067500	0.0402748	-1.72824	down		Seita.2G304700	0.00513519	1.81155	up		Seita.1G314700	3.51385e-08	-1.62388	down		Seita.3G391200	0.0049741	-3.231	down		Seita.2G157500	5.59267e-10	-5.59453	down		Seita.2G024600	1.20617e-18	-9.16119	down		Seita.9G229700	8.21168e-05	8.94089	up		Seita.2G182700	0.00463913	1.48758	up		Seita.1G286600	3.83993e-10	-2.10152	down
Seita.2G160700	0.0183429	2.5048	up		Seita.3G067600	0.0364938	-3.44979	down		Seita.2G305600	0.00193365	-2.79008	down		Seita.1G314800	9.01004e-07	-1.18504	down		Seita.3G391400	0.0353686	3.42185	up		Seita.2G157800	0.0160692	-1.22713	down		Seita.2G024800	5.74523e-20	-Inf	down		Seita.9G233400	1.61921e-07	-3.41239	down		Seita.2G183100	2.62615e-06	2.28251	up		Seita.1G286900	0.011044	1.64972	up
Seita.2G161000	1.28345e-09	3.36681	up		Seita.3G070700	0.0018398	-3.12999	down		Seita.2G308200	9.07341e-10	-2.50633	down		Seita.1G314900	4.95753e-08	-3.58844	down		Seita.3G393500	0.0171772	-2.67899	down		Seita.2G158000	1.16783e-06	-1.22031	down		Seita.2G025700	0.000688539	-1.66775	down		Seita.9G234100	0.0297874	-2.77703	down		Seita.2G183500	2.45673e-07	3.0217	up		Seita.1G287600	0.0302388	-1.10435	down
Seita.2G165500	0.0156191	-1.17705	down		Seita.3G074300	0.00105292	-3.78887	down		Seita.2G308400	0.0335224	1.72856	up		Seita.1G315000	4.66883e-13	-1.60107	down		Seita.3G394900	0.0259769	1.80796	up		Seita.2G158100	1.70654e-10	-1.38338	down		Seita.2G025800	0.00173499	-1.14	down		Seita.9G239700	0.00905322	3.47045	up		Seita.2G185100	0.00559038	-1.18393	down		Seita.1G288000	3.59731e-09	-1.85214	down
Seita.2G165600	0.0155408	-1.49177	down		Seita.3G074700	0.0152883	2.08003	up		Seita.2G308600	8.40537e-07	-1.93423	down		Seita.1G315200	2.46822e-09	1.51014	up		Seita.3G402300	0.0210825	-3.50605	down		Seita.2G159000	3.3232e-56	3.38391	up		Seita.2G026700	4.02638e-07	-1.46119	down		Seita.9G264100	0.00761824	-3.07353	down		Seita.2G185400	1.28181e-22	-2.59394	down		Seita.1G288600	1.62559e-11	-3.41007	down
Seita.2G166600	0.000277536	-1.80353	down		Seita.3G075100	0.0144492	-1.81066	down		Seita.2G310000	0.0145155	-1.87447	down		Seita.1G315400	8.5852e-17	-1.73406	down		Seita.3G404200	0.0138353	2.24271	up		Seita.2G159600	5.89538e-46	Inf	up		Seita.2G026900	1.25517e-08	1.53017	up		Seita.9G269200	0.0273646	-3.60508	down		Seita.2G187200	6.72833e-10	-1.90797	down		Seita.1G288700	0.000938596	-1.04961	down
Seita.2G168000	0.00369523	2.99373	up		Seita.3G077600	0.00275193	3.38457	up		Seita.2G310800	0.0130236	2.00212	up		Seita.1G315500	1.63974e-27	-2.24831	down		Seita.3G405700	2.58238e-05	5.47789	up		Seita.2G159700	0.000468458	-1.72911	down		Seita.2G027000	0.000580396	-1.31375	down		Seita.9G272800	0.0400979	2.09377	up		Seita.2G188200	6.68314e-08	-1.40183	down		Seita.1G289000	2.11136e-11	2.01277	up
Seita.2G168200	0.032154	-1.45165	down		Seita.3G077900	0.00959196	-3.15184	down		Seita.2G312300	0.00627661	-1.36051	down		Seita.1G315600	8.07849e-10	-1.26944	down		Seita.4G003100	0.0147272	-3.70928	down		Seita.2G159900	3.20118e-05	2.52749	up		Seita.2G029900	0.0492918	-1.59618	down		Seita.9G298200	0.0204186	-4.86152	down		Seita.2G190100	0.000883361	-1.54074	down		Seita.1G289100	2.62894e-19	-2.54597	down
Seita.2G169700	0.0126621	1.55521	up		Seita.3G079000	1.62424e-05	-4.7589	down		Seita.2G313200	0.0129528	-1.18707	down		Seita.1G315700	0.000405111	1.44293	up		Seita.4G003800	0.0454507	-4.6164	down		Seita.2G163700	1.83573e-11	-1.42665	down		Seita.2G030500	4.78567e-07	-1.83285	down		Seita.9G298300	0.001	-3.96245	down		Seita.2G190400	0.000483271	-1.21272	down		Seita.1G289700	0.00292546	-1.49165	down
Seita.2G174500	0.000136671	-3.16678	down		Seita.3G080900	0.0205141	-2.33421	down		Seita.2G313400	0.00677326	-1.22686	down		Seita.1G316300	4.95946e-07	-2.31063	down		Seita.4G004900	0.0457247	-4.38088	down		Seita.2G164500	1.346e-17	1.77156	up		Seita.2G030600	1.99819e-19	-2.51673	down		Seita.9G298400	0.0264805	-3.0778	down		Seita.2G190600	2.73488e-13	-2.95796	down		Seita.1G289800	0.0403516	1.0852	up
Seita.2G175800	0.0100825	-3.31898	down		Seita.3G084500	0.000410011	-4.8108	down		Seita.2G313800	2.44131e-07	-4.78841	down		Seita.1G316400	0.0234699	-1.18005	down		Seita.4G005300	4.13465e-15	-4.20378	down		Seita.2G165000	9.8195e-14	-1.67515	down		Seita.2G031700	0.0101236	1.19612	up		Seita.9G305500	0.00773731	-1.88285	down		Seita.2G191000	0.033732	1.05276	up		Seita.1G290200	1.11771e-18	-2.4564	down
Seita.2G177300	0.0469208	-1.02917	down		Seita.3G086000	5.61857e-07	-4.65737	down		Seita.2G315800	0.0236139	2.00723	up		Seita.1G316700	1.20143e-14	-1.61481	down		Seita.4G006100	0.00365731	2.60531	up		Seita.2G165200	0.00295573	-1.27287	down		Seita.2G033100	0.00661504	-1.13477	down		Seita.9G326300	0.0180344	-2.28577	down		Seita.2G191400	0.0151463	-1.54957	down		Seita.1G291100	0.00020885	-1.05136	down
Seita.2G179100	0.00295572	-1.84847	down		Seita.3G091400	0.0230952	2.76332	up		Seita.2G319800	0.0411654	1.31483	up		Seita.1G318100	0.00317072	-1.60914	down		Seita.4G006200	0.00133915	2.20146	up		Seita.2G165600	0.00441099	-1.72577	down		Seita.2G033300	1.38893e-13	1.71012	up		Seita.9G327100	0.000228627	-4.29329	down		Seita.2G192000	0.00586799	-1.04894	down		Seita.1G294000	1.34443e-09	1.74749	up
Seita.2G179500	0.00703554	1.27834	up		Seita.3G094000	0.0231399	2.20108	up		Seita.2G321400	0.0078773	2.1898	up		Seita.1G318900	0.0261281	-1.28026	down		Seita.4G006500	3.02527e-05	-3.18522	down		Seita.2G167900	3.82196e-06	1.28629	up		Seita.2G033500	0.00113444	-1.13446	down		Seita.9G328900	0.00342566	-3.46993	down		Seita.2G193000	1.23357e-08	5.17581	up		Seita.1G294100	3.21111e-05	1.20021	up
Seita.2G179600	2.4668e-09	-2.6924	down		Seita.3G097000	1.61081e-05	-3.33403	down		Seita.2G323400	8.10803e-07	4.27711	up		Seita.1G320100	1.42572e-31	-2.54187	down		Seita.4G008600	0.0173656	-4.29994	down		Seita.2G168000	4.47991e-38	3.74466	up		Seita.2G034400	0.00268507	-1.48106	down		Seita.9G329300	0.00081019	-2.86794	down		Seita.2G193200	4.78641e-08	1.45726	up		Seita.1G294300	2.3892e-31	3.29634	up
Seita.2G179700	0.0270685	-1.22941	down		Seita.3G097400	4.41803e-08	-3.78167	down		Seita.2G323800	0.00169577	-1.55635	down		Seita.1G320200	3.62547e-15	-1.62382	down		Seita.4G010800	0.000490493	-2.26806	down		Seita.2G169200	0.00382047	-1.45916	down		Seita.2G034500	2.21585e-18	-4.36264	down		Seita.9G343600	0.0246175	-2.58978	down		Seita.2G193400	5.07228e-09	4.94977	up		Seita.1G294400	1.14325e-05	-1.26105	down
Seita.2G180300	0.0169609	1.17517	up		Seita.3G100500	0.00734515	4.38768	up		Seita.2G323900	0.0153794	-1.91302	down		Seita.1G321400	0.0319102	1.02998	up		Seita.4G011500	0.014957	-1.66269	down		Seita.2G169400	0.000508479	1.40265	up		Seita.2G035600	0.00766438	1.03111	up		Seita.9G345500	7.21542e-10	-4.0151	down		Seita.2G193700	4.98355e-05	-1.04194	down		Seita.1G294800	3.7544e-06	-1.59139	down
Seita.2G180500	0.0130825	1.54154	up		Seita.3G101000	0.0229161	-2.13423	down		Seita.2G327500	0.00576025	-1.41779	down		Seita.1G322900	5.04113e-05	-1.21242	down		Seita.4G012100	0.0412071	-4.74232	down		Seita.2G169600	1.9622e-22	3.0184	up		Seita.2G036400	1.36318e-12	-2.7488	down		Seita.9G345700	4.47399e-10	-4.04339	down		Seita.2G193900	4.91392e-28	2.71275	up		Seita.1G295100	1.48637e-06	-1.29302	down
Seita.2G181600	0.038144	1.07181	up		Seita.3G101300	0.0026333	4.24886	up		Seita.2G330500	0.0025162	-1.63473	down		Seita.1G323700	2.17566e-05	-1.76311	down		Seita.4G013200	0.00286522	-1.82009	down		Seita.2G169700	7.28524e-20	1.85374	up		Seita.2G038000	1.22511e-06	1.90428	up		Seita.9G350600	0.0472861	1.87905	up		Seita.2G194000	1.91722e-15	-2.22002	down		Seita.1G295200	4.58725e-05	1.11191	up
Seita.2G183300	0.00248511	-4.04782	down		Seita.3G101400	0.0191128	-2.58446	down		Seita.2G330800	0.0341696	1.31141	up		Seita.1G324100	7.65327e-28	-3.92481	down		Seita.4G013300	0.0185855	-1.44636	down		Seita.2G171400	8.71927e-13	-4.39587	down		Seita.2G038800	1.84972e-11	-3.91067	down		Seita.9G357000	0.000869691	2.42072	up		Seita.2G196700	2.1631e-08	1.54758	up		Seita.1G295400	0.0281341	1.31875	up
Seita.2G186000	0.0163636	1.69229	up		Seita.3G102200	0.0109951	1.78838	up		Seita.2G333600	2.0202e-40	Inf	up		Seita.1G324300	7.19717e-24	2.03504	up		Seita.4G013400	0.0156018	-2.59435	down		Seita.2G172500	0.00161781	1.51473	up		Seita.2G038900	2.72919e-16	-1.79971	down		Seita.9G361200	0.0010641	2.29679	up		Seita.2G198100	9.39393e-07	1.40274	up		Seita.1G295700	8.56739e-12	-2.44139	down
Seita.2G187200	0.00433732	1.44709	up		Seita.3G105100	0.0303525	-1.77498	down		Seita.2G335600	0.000179525	-2.18194	down		Seita.1G324800	5.552e-17	-3.44251	down		Seita.4G013500	7.60526e-05	-2.19985	down		Seita.2G172800	0.0128157	-1.35719	down		Seita.2G039200	1.80957e-05	-1.69618	down		Seita.9G363300	0.0132198	2.50135	up		Seita.2G199400	1.81151e-10	-1.78207	down		Seita.1G297100	2.93135e-07	-1.47111	down
Seita.2G187300	0.00724337	-4.45194	down		Seita.3G105800	0.000106101	-2.69562	down		Seita.2G340700	0.00578254	1.82685	up		Seita.1G325400	3.14839e-07	-1.16333	down		Seita.4G025500	0.0103813	2.60852	up		Seita.2G173700	9.08442e-08	1.16062	up		Seita.2G039800	6.29281e-16	-1.79339	down		Seita.9G363400	0.0108486	-2.08123	down		Seita.2G199500	7.14377e-06	2.51484	up		Seita.1G298000	3.04882e-12	-2.41169	down
Seita.2G187400	7.22611e-05	-3.23376	down		Seita.3G109400	0.0483427	-1.49172	down		Seita.2G342700	7.29088e-05	-1.96345	down		Seita.1G325500	1.75425e-07	-1.1256	down		Seita.4G029000	0.0335964	-5.76539	down		Seita.2G174400	0.00665048	1.40806	up		Seita.2G040600	3.92519e-06	-2.42761	down		Seita.9G367400	0.0132973	-2.25478	down		Seita.2G200200	8.28644e-05	4.27041	up		Seita.1G299200	3.93975e-62	-5.10643	down
Seita.2G187800	9.56702e-08	-6.24124	down		Seita.3G111700	0.0444249	2.17939	up		Seita.2G342900	7.34036e-10	4.27161	up		Seita.1G325700	3.1573e-09	-1.19503	down		Seita.4G029200	3.25865e-09	-3.24517	down		Seita.2G175100	0.00341235	-1.82005	down		Seita.2G040700	1.00502e-05	-2.10389	down		Seita.9G369800	0.00545468	-2.37402	down		Seita.2G202100	0.0304854	-1.02997	down		Seita.1G301100	0.0004894	-1.87086	down
Seita.2G187900	0.0142263	-1.72179	down		Seita.3G112700	0.027393	-1.61705	down		Seita.2G343000	2.15741e-10	-3.06935	down		Seita.1G325900	0.000183687	-1.1941	down		Seita.4G029800	9.646e-15	-4.99395	down		Seita.2G175200	0.00233117	-1.54449	down		Seita.2G041200	0.00744117	-1.30403	down		Seita.9G377000	0.000869691	-3.01953	down		Seita.2G202200	6.20137e-23	-2.35795	down		Seita.1G301300	1.30389e-14	2.68583	up
Seita.2G189100	0.00122276	-2.39731	down		Seita.3G113500	0.00039225	4.33285	up		Seita.2G343200	0.023414	2.56913	up		Seita.1G326000	2.06178e-15	-5.23775	down		Seita.4G034700	2.9473e-08	3.00677	up		Seita.2G175800	2.01306e-05	-1.79158	down		Seita.2G041600	7.35348e-10	-1.62365	down		Seita.9G378500	1.22624e-05	5.77375	up		Seita.2G202500	0.000110413	-1.02636	down		Seita.1G301600	0.000230656	1.73379	up
Seita.2G192400	0.00533783	-3.58783	down		Seita.3G115200	0.0437927	-1.59033	down		Seita.2G343700	0.021238	1.01268	up		Seita.1G326100	6.27441e-13	-2.75097	down		Seita.4G035500	0.0282675	4.09555	up		Seita.2G176800	9.54498e-11	-2.17128	down		Seita.2G042800	4.75716e-15	1.81115	up		Seita.9G380600	2.78294e-06	2.98589	up		Seita.2G203100	0.000929288	-1.00857	down		Seita.1G302400	0.00288804	-1.70134	down
Seita.2G194000	0.00778282	-2.79966	down		Seita.3G117700	0.00102032	-2.35416	down		Seita.2G345500	0.023414	-1.00966	down		Seita.1G326200	9.98503e-05	-1.82775	down		Seita.4G042100	9.83719e-05	-3.23879	down		Seita.2G177500	1.52492e-56	4.23708	up		Seita.2G043500	1.0328e-39	-4.39569	down		Seita.9G386600	0.020626	3.11008	up		Seita.2G203600	2.06905e-07	-1.31582	down		Seita.1G302500	0.0102422	-4.39603	down
Seita.2G194500	0.000562269	-2.8532	down		Seita.3G119400	0.000382812	2.50552	up		Seita.2G348200	0.00331934	-1.53894	down		Seita.1G326600	3.96396e-06	1.51355	up		Seita.4G045200	0.00833953	1.74687	up		Seita.2G177900	0.0184073	1.8991	up		Seita.2G043900	1.24598e-21	-2.68698	down		Seita.9G395400	0.0202701	7.8932	up		Seita.2G204600	0.00246631	-1.60032	down		Seita.1G302900	1.24422e-11	4.3433	up
Seita.2G195200	0.0219861	-1.33971	down		Seita.3G120300	2.85459e-05	-2.9036	down		Seita.2G350200	0.0296652	-1.27745	down		Seita.1G326900	7.32254e-20	-2.50261	down		Seita.4G053700	0.0227141	-2.23079	down		Seita.2G179500	0.00317221	1.12451	up		Seita.2G044200	6.32514e-38	-3.07025	down		Seita.9G396900	0.0445557	-2.27679	down		Seita.2G205900	9.99975e-05	-1.04461	down		Seita.1G304200	0.00150921	-1.79915	down
Seita.2G196500	0.0107357	1.32557	up		Seita.3G120800	0.0331565	1.80982	up		Seita.2G351400	0.0164182	1.58971	up		Seita.1G327300	3.06888e-14	-3.02274	down		Seita.4G066000	0.0215578	-5.65247	down		Seita.2G180200	0.000138024	-1.05004	down		Seita.2G044900	3.69115e-23	-2.29918	down		Seita.9G410800	0.00162481	3.15566	up		Seita.2G206200	1.80914e-18	2.35897	up		Seita.1G305000	3.68898e-06	1.27024	up
Seita.2G197200	0.0191367	-1.75921	down		Seita.3G120900	0.000776933	-2.39895	down		Seita.2G351600	0.0035984	-1.79249	down		Seita.1G327600	0.0223357	1.45754	up		Seita.4G066200	0.0324251	-3.73915	down		Seita.2G181500	1.32206e-27	2.2248	up		Seita.2G045900	4.36117e-11	3.85206	up		Seita.9G416100	6.84797e-30	7.76901	up		Seita.2G207200	0.00704576	-1.11551	down		Seita.1G305400	1.53514e-09	-2.40042	down
Seita.2G198800	0.012307	-2.33227	down		Seita.3G122700	0.0141123	-4.11392	down		Seita.2G352000	5.8149e-05	2.65337	up		Seita.1G328000	0.0447548	-1.23938	down		Seita.4G079300	0.00139009	-3.42376	down		Seita.2G181600	5.75488e-06	-1.37401	down		Seita.2G046000	2.98504e-09	-1.43307	down		Seita.9G418200	0.000673112	2.41725	up		Seita.2G207900	1.51078e-07	-1.29049	down		Seita.1G307000	4.78434e-06	-1.61143	down
Seita.2G199100	2.49716e-06	-3.21343	down		Seita.3G123300	0.0371871	-2.16215	down		Seita.2G352300	0.0375233	-1.58786	down		Seita.1G328200	0.000110442	1.49049	up		Seita.4G079400	0.029395	-4.00062	down		Seita.2G182800	0.0184742	-1.4097	down		Seita.2G046100	0.0340201	-1.73789	down		Seita.9G431100	0.00626356	6.46806	up		Seita.2G209600	0.0238848	-1.30648	down		Seita.1G308300	2.23359e-10	-3.79323	down
Seita.2G199800	0.0219892	-1.8167	down		Seita.3G124200	0.000454739	-3.30214	down		Seita.2G352400	0.00101421	3.82023	up		Seita.1G329500	3.22291e-25	-2.12941	down		Seita.4G079600	0.000537077	2.23498	up		Seita.2G185400	4.77691e-17	-1.92344	down		Seita.2G048000	1.11493e-06	1.12326	up		Seita.9G431400	0.0194429	-2.41119	down		Seita.2G209900	1.4344e-12	-1.75414	down		Seita.1G308500	2.62757e-05	-2.26356	down
Seita.2G199900	0.00895339	-2.0347	down		Seita.3G125300	0.00165768	-2.55908	down		Seita.2G352700	2.40359e-05	-4.22063	down		Seita.1G329800	2.79559e-07	-2.98579	down		Seita.4G079700	0.0167041	2.70546	up		Seita.2G187200	2.26955e-35	-3.48166	down		Seita.2G048800	0.00753755	-1.05036	down		Seita.9G440600	0.0245491	-1.99672	down		Seita.2G211300	0.011714	-1.6864	down		Seita.1G308900	1.11795e-15	4.1403	up
Seita.2G200800	7.0339e-05	1.94833	up		Seita.3G128000	0.000570148	-2.36727	down		Seita.2G352900	2.93783e-09	-3.34607	down		Seita.1G330100	8.2751e-07	-1.53869	down		Seita.4G083300	5.68885e-08	-3.51656	down		Seita.2G188200	2.93297e-44	-3.10362	down		Seita.2G049100	1.12271e-08	-2.3624	down		Seita.9G440900	0.0117981	-2.05348	down		Seita.2G216800	2.00351e-05	-1.67266	down		Seita.1G309100	0.00480023	-1.03275	down
Seita.2G200900	0.00579681	1.49113	up		Seita.3G129000	0.0154433	-1.88733	down		Seita.2G353400	0.0457924	1.53952	up		Seita.1G330300	1.28304e-09	-1.34022	down		Seita.4G087700	1.9698e-05	-3.57242	down		Seita.2G190100	0.00507463	-1.42558	down		Seita.2G050400	3.82259e-15	-Inf	down		Seita.9G441000	1.40284e-06	-3.60228	down		Seita.2G216900	7.51204e-05	-1.64342	down		Seita.1G309600	4.87455e-31	4.50461	up
Seita.2G201000	0.00384235	1.42344	up		Seita.3G131400	0.0299309	-2.32374	down		Seita.2G353800	0.00132029	1.38569	up		Seita.1G330600	1.94194e-07	3.04195	up		Seita.4G090500	0.0419895	4.17709	up		Seita.2G190600	6.57641e-45	-3.06866	down		Seita.2G051800	3.32478e-06	1.08365	up		Seita.9G443200	0.00472974	-2.06754	down		Seita.2G217100	6.18752e-08	1.33797	up		Seita.1G309800	2.60057e-09	-2.12597	down
Seita.2G203100	0.0222581	-3.63298	down		Seita.3G131700	0.0289041	-1.5851	down		Seita.2G356500	0.00792367	-1.14923	down		Seita.1G331300	8.8498e-06	1.70006	up		Seita.4G091100	0.00219748	2.13812	up		Seita.2G191000	0.0362827	1.00891	up		Seita.2G053300	1.27924e-08	2.90112	up		Seita.9G443500	3.15186e-13	4.52203	up		Seita.2G217200	1.15218e-05	2.74245	up		Seita.1G311100	0.00377523	1.22947	up
Seita.2G206000	6.80041e-06	-3.00901	down		Seita.3G132100	0.00222976	-2.47725	down		Seita.2G358200	0.00566746	1.16339	up		Seita.1G331800	0.0100145	-1.31065	down		Seita.4G101300	1.15726e-09	-3.20995	down		Seita.2G191800	0.000170023	1.94971	up		Seita.2G053400	2.64691e-20	Inf	up		Seita.9G451500	3.04184e-06	5.14203	up		Seita.2G217500	0.0305403	-1.2482	down		Seita.1G311400	5.00148e-05	-1.47553	down
Seita.2G206100	5.93144e-07	-3.86625	down		Seita.3G132400	9.44381e-11	-4.43296	down		Seita.2G360800	6.72942e-08	-4.07071	down		Seita.1G332000	5.79076e-08	-3.18426	down		Seita.4G105600	0.0052832	-6.65663	down		Seita.2G192100	8.44001e-12	1.39643	up		Seita.2G054900	1.03441e-05	-1.34893	down		Seita.9G456600	0.000167599	-2.53805	down		Seita.2G217800	3.21337e-09	-1.45802	down		Seita.1G311600	0.0205598	1.16181	up
Seita.2G209900	0.00213986	-2.12583	down		Seita.3G132600	0.0459527	-2.094	down		Seita.2G366500	0.0344016	-1.10338	down		Seita.1G332900	7.56482e-05	-1.89	down		Seita.4G108300	0.000381597	2.02755	up		Seita.2G192400	0.0188145	1.15746	up		Seita.2G057100	0.000103853	-1.02636	down		Seita.9G457400	0.00509013	2.05336	up		Seita.2G218700	4.4925e-15	2.0565	up		Seita.1G311700	0.0487856	-1.0313	down
Seita.2G210300	0.0343561	1.12732	up		Seita.3G133300	0.0385945	1.86705	up		Seita.2G366600	0.0316863	-1.47088	down		Seita.1G333100	8.65431e-10	-1.36516	down		Seita.4G111400	0.00139951	2.57522	up		Seita.2G193000	4.43732e-35	4.82413	up		Seita.2G058300	0.00013469	-1.34139	down		Seita.9G458900	0.00502434	-2.00913	down		Seita.2G220400	3.45513e-07	2.61634	up		Seita.1G312800	0.000486622	-1.81332	down
Seita.2G211000	0.0235072	1.36341	up		Seita.3G134800	0.00084393	-2.34167	down		Seita.2G367800	0.0348651	-1.13978	down		Seita.1G334400	3.77076e-12	-1.95608	down		Seita.4G111500	7.86597e-07	-5.26302	down		Seita.2G193900	2.89423e-42	2.83573	up		Seita.2G059600	2.09596e-19	-Inf	down		Seita.9G460200	0.000155562	3.77378	up		Seita.2G223900	3.86037e-06	-1.15012	down		Seita.1G312900	4.79671e-05	-1.78048	down
Seita.2G212900	7.02611e-06	-2.74679	down		Seita.3G136400	0.00205888	2.73019	up		Seita.2G369800	1.66339e-05	3.57127	up		Seita.1G334600	0.000240018	1.462	up		Seita.4G113700	0.0162441	-2.78631	down		Seita.2G194000	0.000348917	-1.3298	down		Seita.2G062100	0.0373606	-1.01434	down		Seita.9G465800	0.00104161	-2.15764	down		Seita.2G224300	1.95496e-13	-1.80008	down		Seita.1G313200	0.0477081	1.0389	up
Seita.2G213800	0.000627505	-2.74549	down		Seita.3G136800	1.00509e-07	-3.92824	down		Seita.2G372500	0.00551045	-2.13899	down		Seita.1G334700	7.27575e-07	2.00677	up		Seita.4G118500	0.01476	-5.05752	down		Seita.2G194200	0.000540015	-1.85696	down		Seita.2G063300	1.75881e-13	-1.92291	down		Seita.9G471900	0.000250626	-2.4481	down		Seita.2G224400	1.05555e-06	-1.26526	down		Seita.1G313700	1.29804e-07	-1.73573	down
Seita.2G216900	0.00187763	-2.33993	down		Seita.3G138700	2.81483e-06	4.83673	up		Seita.2G373600	0.00103213	3.2142	up		Seita.1G335200	4.9691e-12	1.39452	up		Seita.4G122200	0.000328378	-3.44207	down		Seita.2G195300	3.00052e-05	-1.21944	down		Seita.2G065300	2.05837e-16	-1.88712	down		Seita.9G475300	5.38643e-06	-3.96199	down		Seita.2G226300	3.53341e-06	-2.42785	down		Seita.1G314100	2.24905e-06	-1.60949	down
Seita.2G217200	0.0472467	-1.43072	down		Seita.3G139000	0.00605374	2.23827	up		Seita.2G374300	0.0352629	-1.69896	down		Seita.1G336200	1.81477e-47	4.23203	up		Seita.4G122300	0.000520341	-1.88807	down		Seita.2G196200	0.0268267	-3.38592	down		Seita.2G066800	7.40773e-08	2.57664	up		Seita.9G476100	0.0100797	1.83199	up		Seita.2G227100	0.00367277	1.62467	up		Seita.1G314500	5.78633e-05	-2.87297	down
Seita.2G217500	0.000394039	-2.40275	down		Seita.3G139200	0.00398732	3.1308	up		Seita.2G374400	1.72774e-05	-1.82661	down		Seita.1G336500	0.000132417	1.85085	up		Seita.4G124800	0.0447647	1.28696	up		Seita.2G196300	0.00472025	1.11411	up		Seita.2G067200	3.04713e-06	-2.60045	down		Seita.9G478000	0.000100685	-4.47008	down		Seita.2G228300	0.0202438	1.25953	up		Seita.1G314800	3.44704e-06	-1.30013	down
Seita.2G217800	0.00363195	2.41325	up		Seita.3G142400	8.26569e-10	4.27369	up		Seita.2G374700	0.0149006	1.26319	up		Seita.1G336900	2.6651e-27	-2.86244	down		Seita.4G125800	0.0272522	-2.49053	down		Seita.2G196500	6.70182e-06	-1.00015	down		Seita.2G067300	5.65236e-09	-2.9542	down		Seita.9G480700	0.0310762	-1.68346	down		Seita.2G229100	1.12394e-06	-1.23904	down		Seita.1G314900	0.000238131	-2.12395	down
Seita.2G218700	4.72578e-18	5.04179	up		Seita.3G142500	0.00465419	-2.2824	down		Seita.2G375300	0.0143605	4.80167	up		Seita.1G337300	1.93013e-05	1.41935	up		Seita.4G125900	0.0450724	-3.68686	down		Seita.2G198100	4.14125e-14	2.0689	up		Seita.2G067800	6.70088e-13	-2.90037	down		Seita.9G483100	0.0400979	3.68142	up		Seita.2G229700	0.00112192	1.14252	up		Seita.1G315200	3.42969e-05	1.30304	up
Seita.2G218800	0.00631782	1.50174	up		Seita.3G143200	0.0169139	1.82173	up		Seita.2G378000	0.00351769	-1.27893	down		Seita.1G338100	9.74341e-23	-2.22867	down		Seita.4G132100	0.0023709	5.21876	up		Seita.2G199200	0.00110517	-1.16715	down		Seita.2G068200	5.16893e-07	-2.06224	down		Seita.9G483600	0.000787676	-4.347	down		Seita.2G231300	0.00199109	-1.85317	down		Seita.1G315300	1.99651e-26	4.72358	up
Seita.2G219600	1.72421e-06	-2.50275	down		Seita.3G144000	0.00946591	1.97831	up		Seita.2G381500	4.63237e-11	8.76473	up		Seita.1G338700	0.0131984	-1.40701	down		Seita.4G132600	0.0424031	-4.68571	down		Seita.2G199300	9.1143e-06	-1.23675	down		Seita.2G069000	2.89065e-18	-2.60162	down		Seita.9G486000	0.0227106	-2.07311	down		Seita.2G232500	9.72169e-06	-1.09639	down		Seita.1G315400	0.000286242	-1.25125	down
Seita.2G221700	0.00887216	1.58894	up		Seita.3G144300	0.0242145	-2.21807	down		Seita.2G381600	0.00642325	1.43039	up		Seita.1G339100	2.45214e-22	-4.20247	down		Seita.4G138700	0.0372152	1.43583	up		Seita.2G199500	2.10117e-11	2.7512	up		Seita.2G069100	5.01991e-09	-1.79792	down		Seita.9G488400	0.00567276	3.32335	up		Seita.2G233700	0.0431801	-1.0013	down		Seita.1G315500	5.29403e-05	-1.50537	down
Seita.2G222600	0.0444202	-2.74762	down		Seita.3G147200	0.0413857	-3.28865	down		Seita.2G381700	0.00100124	1.8674	up		Seita.1G339700	5.25712e-06	-1.48308	down		Seita.4G141400	0.0186229	1.89007	up		Seita.2G199600	9.3257e-08	1.12197	up		Seita.2G069900	0.00415184	-1.85548	down		Seita.9G494200	0.00703718	-1.87138	down		Seita.2G235000	0.0100925	-4.01806	down		Seita.1G316300	8.26139e-07	-1.83078	down
Seita.2G222800	4.54033e-23	-5.18496	down		Seita.3G148700	0.004284	5.29023	up		Seita.2G382600	2.18843e-31	5.94683	up		Seita.1G339900	0.0044782	-2.47211	down		Seita.4G144600	0.00350112	-3.89157	down		Seita.2G200100	2.88349e-05	4.19231	up		Seita.2G070100	1.40766e-05	-1.07547	down		Seita.9G496200	0.040232	-2.54023	down		Seita.2G236000	9.58542e-06	1.20816	up		Seita.1G317100	0.000922293	-1.56383	down
Seita.2G223700	1.31242e-11	-3.15171	down		Seita.3G151000	0.0162792	1.75658	up		Seita.2G383400	0.00677326	-1.80518	down		Seita.1G340100	1.62995e-30	-5.24544	down		Seita.4G145300	0.00169818	-5.16694	down		Seita.2G200200	5.10548e-05	5.24582	up		Seita.2G070300	0.0228613	-1.26142	down		Seita.9G516300	0.0119875	3.39718	up		Seita.2G236300	1.03381e-05	-3.70152	down		Seita.1G317300	7.00533e-05	-1.11957	down
Seita.2G224000	0.0113817	-1.34904	down		Seita.3G151800	0.00132786	-3.08329	down		Seita.2G384400	0.000673282	4.16373	up		Seita.1G340300	2.41124e-07	-3.14515	down		Seita.4G150700	0.0166287	-2.91788	down		Seita.2G201400	0.0212389	-1.1041	down		Seita.2G072400	0.000447796	1.3319	up		Seita.9G519200	0.0147344	-3.46072	down		Seita.2G239200	0.000196583	-1.07311	down		Seita.1G317500	0.000806008	-1.07334	down
Seita.2G224300	2.60569e-10	-2.84568	down		Seita.3G153500	0.0362118	2.67644	up		Seita.2G384900	0.0170654	-1.16748	down		Seita.1G341100	1.1062e-88	-6.57387	down		Seita.4G152400	0.000255278	-2.74009	down		Seita.2G202200	3.30236e-30	-2.3746	down		Seita.2G077100	1.03019e-06	1.11261	up		Seita.9G519300	0.017009	1.72579	up		Seita.2G240200	0.0300382	-1.79678	down		Seita.1G317600	0.00381133	1.12121	up
Seita.2G224400	0.00177462	-1.81402	down		Seita.3G154700	0.000633489	-2.55107	down		Seita.2G385300	0.0289962	-1.56845	down		Seita.1G342400	2.52294e-67	3.98531	up		Seita.4G154100	0.00589158	-4.14092	down		Seita.2G202500	1.42493e-05	-1.08644	down		Seita.2G077200	0.0108865	-1.68399	down		Seita.9G533000	0.00242391	-4.46637	down		Seita.2G241800	1.04745e-08	1.42472	up		Seita.1G318100	0.0104479	-1.28262	down
Seita.2G225500	0.0357639	1.43921	up		Seita.3G157300	2.84346e-06	-4.15263	down		Seita.2G386800	0.0352629	-1.06312	down		Seita.1G342800	0.00119971	-1.37725	down		Seita.4G154500	0.0224566	-3.62725	down		Seita.2G204600	9.28542e-10	-2.94965	down		Seita.2G079200	3.89534e-10	1.38505	up		Seita.9G548800	0.0439483	-1.63094	down		Seita.2G243200	8.1538e-11	-4.20939	down		Seita.1G318800	4.57711e-05	-1.35808	down
Seita.2G226100	0.0167798	-1.89306	down		Seita.3G157400	0.0134883	4.74917	up		Seita.2G387200	3.66284e-06	-1.89336	down		Seita.1G343300	0.0374747	1.17118	up		Seita.4G159500	0.0482758	5.56987	up		Seita.2G205100	0.000100585	-1.19793	down		Seita.2G080100	0.0141858	1.35747	up		Seita.9G559200	0.026	2.54201	up		Seita.2G244000	4.98978e-14	-2.11429	down		Seita.1G318900	2.02558e-05	-2.15122	down
Seita.2G226300	0.000110395	-2.60543	down		Seita.3G158400	0.0221168	-1.78698	down		Seita.2G388200	0.048361	-1.51483	down		Seita.1G344600	4.90827e-06	1.02618	up		Seita.4G165700	0.0274797	-2.59757	down		Seita.2G205700	0.0392431	1.09565	up		Seita.2G080200	2.6258e-23	4.90913	up		Seita.9G559400	0.0467029	-2.53089	down		Seita.2G244300	1.94826e-11	-1.73852	down		Seita.1G319500	0.000459103	1.4594	up
Seita.2G228300	0.00173969	-1.84883	down		Seita.3G158500	0.00449327	-3.34231	down		Seita.2G391600	7.22189e-06	1.98282	up		Seita.1G345300	0.0125276	2.15345	up		Seita.4G168800	0.00356343	-2.54601	down		Seita.2G205900	4.7427e-06	-1.32041	down		Seita.2G081000	1.95649e-13	5.09085	up		Seita.9G562600	0.0189804	-2.05647	down		Seita.2G248100	4.8753e-12	-2.31697	down		Seita.1G320100	3.30981e-16	-2.14942	down
Seita.2G228700	0.0188532	-1.16642	down		Seita.3G162400	3.3135e-07	11.3814	up		Seita.2G395000	1.70529e-08	2.28182	up		Seita.1G345400	3.50058e-13	-1.53706	down		Seita.4G173400	0.0173656	-3.61675	down		Seita.2G206000	0.0320621	-1.02665	down		Seita.2G082400	0.0175915	-1.19715	down		Seita.9G562900	0.0305016	1.63136	up		Seita.2G248500	0.000716536	1.25474	up		Seita.1G321900	0.024735	1.09526	up
Seita.2G229000	0.0292756	-1.61738	down		Seita.3G162800	0.0190694	2.05562	up		Seita.2G396200	0.048061	-1.75528	down		Seita.1G345900	6.77015e-17	-4.1167	down		Seita.4G175200	0.00483039	2.6788	up		Seita.2G206200	1.82069e-05	1.41301	up		Seita.2G082600	0.000498043	-1.57641	down		Seita.9G570100	0.000441624	-2.44056	down		Seita.2G250300	0.0259398	-2.87432	down		Seita.1G322500	0.00122741	1.50975	up
Seita.2G229900	1.7352e-22	5.78119	up		Seita.3G164700	0.0233034	1.94915	up		Seita.2G397700	0.016357	1.79596	up		Seita.1G346100	0.00306495	1.4636	up		Seita.4G175400	0.0155891	-2.07904	down		Seita.2G207200	0.00132605	-1.35958	down		Seita.2G087100	5.73048e-06	-2.30423	down		Seita.9G573900	0.0134526	-4.17658	down		Seita.2G251700	0.000716111	-2.67234	down		Seita.1G322900	0.000487005	-1.00133	down
Seita.2G231400	0.0240265	-2.23693	down		Seita.3G164900	0.0476934	2.23413	up		Seita.2G398500	0.00970993	-1.40895	down		Seita.1G346700	4.54531e-53	3.87301	up		Seita.4G176800	0.00170429	-4.55242	down		Seita.2G207900	2.52236e-29	-3.06714	down		Seita.2G087900	3.03386e-07	1.84362	up		Seita.J003300	0.00562796	-2.64362	down		Seita.2G252100	0.0386514	-1.23754	down		Seita.1G323100	3.36136e-06	1.29845	up
Seita.2G231800	9.19201e-11	-3.98054	down		Seita.3G165100	0.0241425	3.74676	up		Seita.2G399600	0.000760327	2.74412	up		Seita.1G347900	0.000300883	1.8615	up		Seita.4G180500	0.0298745	1.67388	up		Seita.2G209600	0.0287813	-1.54448	down		Seita.2G090200	0.00150202	1.33233	up		Seita.J011900	0.00566827	2.52741	up		Seita.2G253200	3.48643e-09	-1.53189	down		Seita.1G323200	3.59192e-07	1.54097	up
Seita.2G232600	8.85289e-15	-4.94627	down		Seita.3G168300	0.0320952	-2.46981	down		Seita.2G401000	0.00399388	-1.3888	down		Seita.1G348100	0.0047188	1.34676	up		Seita.4G193600	0.0483192	-1.9823	down		Seita.2G211100	3.95884e-08	-1.23482	down		Seita.2G090400	4.50623e-28	-Inf	down							Seita.2G255100	1.10919e-05	1.17603	up		Seita.1G323400	0.00413407	1.41361	up
Seita.2G232900	0.00305548	-1.7171	down		Seita.3G171200	0.00023645	-2.7465	down		Seita.2G401300	3.28053e-12	-2.71599	down		Seita.1G349200	1.50909e-08	-1.42829	down		Seita.4G195600	0.00830158	3.01287	up		Seita.2G211200	0.0164828	-1.289	down		Seita.2G090500	2.31878e-06	2.38356	up							Seita.2G255500	0.000151846	2.22273	up		Seita.1G323700	0.000604593	-1.35296	down
Seita.2G233100	0.0349706	-1.08597	down		Seita.3G173400	6.11942e-09	4.0831	up		Seita.2G402500	0.0121715	-1.20374	down		Seita.1G349400	1.45874e-07	-2.67482	down		Seita.4G196000	0.000313629	5.98561	up		Seita.2G211800	7.72478e-09	2.12238	up		Seita.2G092300	2.14679e-27	2.49945	up							Seita.2G255600	5.0632e-08	1.66654	up		Seita.1G323900	4.82846e-06	1.32516	up
Seita.2G233700	2.06615e-06	-2.63048	down		Seita.3G175200	0.00051176	2.95886	up		Seita.2G405500	7.71375e-06	-1.96389	down		Seita.1G349500	0.015166	-1.14297	down		Seita.4G198200	0.013213	-1.89588	down		Seita.2G213200	5.08323e-05	-2.61631	down		Seita.2G093000	5.62779e-05	-1.44357	down							Seita.2G255800	0.0215684	1.08904	up		Seita.1G324100	0.00247781	-2.69158	down
Seita.2G234000	9.52375e-09	-5.3479	down		Seita.3G175700	0.0458508	1.77771	up		Seita.2G405900	0.0207973	-1.29503	down		Seita.1G349600	7.66077e-11	-2.42913	down		Seita.4G207300	0.00162657	1.79135	up		Seita.2G216800	3.3794e-05	-2.09101	down		Seita.2G095400	0.0273124	1.46106	up							Seita.2G256100	8.07804e-05	1.02773	up		Seita.1G324300	1.32271e-16	2.40239	up
Seita.2G234300	0.00229322	-5.54914	down		Seita.3G176400	0.0307368	-1.65238	down		Seita.2G412400	0.000164047	2.69573	up		Seita.1G349700	2.25964e-11	-3.24204	down		Seita.4G212300	0.00435418	1.97147	up		Seita.2G217100	6.52804e-13	1.46541	up		Seita.2G095700	4.11496e-07	-1.33895	down							Seita.2G256700	0.0295935	-1.25438	down		Seita.1G324800	4.6003e-08	-1.9698	down
Seita.2G234400	5.0938e-09	-6.56736	down		Seita.3G177600	0.00743203	-2.2834	down		Seita.2G415600	0.00622704	-1.22006	down		Seita.1G352100	2.86351e-08	-2.64906	down		Seita.4G215700	0.0492416	-2.78973	down		Seita.2G217700	5.99853e-06	1.02326	up		Seita.2G097700	0.00288179	-1.44989	down							Seita.2G256900	0.00286028	1.2459	up		Seita.1G325400	7.70538e-10	-1.61673	down
Seita.2G234500	0.000184002	-5.35017	down		Seita.3G178100	0.0386183	-1.57882	down		Seita.2G418000	7.43854e-05	3.09693	up		Seita.1G352900	0.00164121	-2.14094	down		Seita.4G216800	0.00887142	-5.92686	down		Seita.2G217800	8.75613e-07	-1.04392	down		Seita.2G098500	2.17184e-08	-1.28484	down							Seita.2G257700	0.00680001	-1.10493	down		Seita.1G325500	4.03221e-17	-2.24572	down
Seita.2G234700	3.42964e-13	-6.79806	down		Seita.3G180800	0.000209214	-2.71665	down		Seita.2G418400	1.00226e-05	3.99093	up		Seita.1G353000	3.18201e-06	1.16217	up		Seita.4G221000	0.0389813	-1.97364	down		Seita.2G218200	2.50231e-09	3.48918	up		Seita.2G099400	0.00228579	-1.0674	down							Seita.2G257800	2.95536e-05	-1.05837	down		Seita.1G325700	1.26213e-05	-1.3541	down
Seita.2G234800	2.31777e-08	-6.97515	down		Seita.3G181100	0.00743883	-3.20628	down		Seita.2G419000	3.24148e-08	-2.42098	down		Seita.1G353500	1.06189e-14	1.98622	up		Seita.4G222600	0.0318302	-1.74503	down		Seita.2G218500	8.73269e-05	-2.04413	down		Seita.2G102600	0.0444304	-1.01579	down							Seita.2G258900	3.85598e-07	2.66909	up		Seita.1G326000	2.8781e-07	-2.78123	down
Seita.2G237100	0.00189666	1.72691	up		Seita.3G182000	0.0462377	1.79582	up		Seita.2G422000	6.94791e-06	-1.84305	down		Seita.1G353700	0.0424151	1.09643	up		Seita.4G228600	0.0191521	-2.79407	down		Seita.2G218700	1.53332e-07	2.56524	up		Seita.2G102800	4.04875e-05	-2.38782	down							Seita.2G260500	1.77953e-07	3.0519	up		Seita.1G326200	0.000406552	-1.47272	down
Seita.2G237300	0.0194711	1.16085	up		Seita.3G189000	0.0111614	-2.82959	down		Seita.2G422300	0.00205231	-2.5464	down		Seita.1G354100	5.84036e-07	-2.02334	down		Seita.4G233500	0.0473559	1.7114	up		Seita.2G220400	6.53858e-12	3.39448	up		Seita.2G102900	0.00898493	-1.46289	down							Seita.2G262300	2.09124e-06	2.96596	up		Seita.1G326600	1.35871e-05	-2.2836	down
Seita.2G237400	3.29799e-06	2.88121	up		Seita.3G189700	0.0139613	-2.2417	down		Seita.2G423200	0.00104531	-2.32327	down		Seita.1G354600	1.79212e-09	2.38492	up		Seita.4G234400	0.0038361	-1.89945	down		Seita.2G220700	0.00860687	1.30375	up		Seita.2G103600	3.92386e-28	-2.57688	down							Seita.2G262500	4.61872e-05	2.03374	up		Seita.1G326900	3.91256e-06	-1.78953	down
Seita.2G237500	0.0203688	-1.57621	down		Seita.3G192500	0.00400255	-5.88889	down		Seita.2G423300	0.00150697	-1.60917	down		Seita.1G354800	1.00342e-09	-1.30152	down		Seita.4G236500	0.020833	-2.92889	down		Seita.2G221700	0.00451571	-1.90939	down		Seita.2G105000	0.0113967	1.22737	up							Seita.2G263000	2.01454e-25	-2.73123	down		Seita.1G327300	0.00478915	-1.08079	down
Seita.2G238400	0.0377086	-2.08636	down		Seita.3G193100	0.00913858	-1.9101	down		Seita.2G428800	0.0308946	1.34839	up		Seita.1G355600	0.00608542	-1.67857	down		Seita.4G239600	3.65461e-05	3.06883	up		Seita.2G222900	0.0169152	1.20589	up		Seita.2G106200	7.75554e-05	-1.7814	down							Seita.2G263800	7.23188e-28	-6.44085	down		Seita.1G327600	0.0438154	1.05105	up
Seita.2G238900	0.0174343	-2.39642	down		Seita.3G194300	0.00937864	-2.18336	down		Seita.2G428900	0.000465218	-1.43483	down		Seita.1G356800	0.000998123	2.52456	up		Seita.4G239800	0.00173223	1.8251	up		Seita.2G223900	2.20083e-08	-1.15624	down		Seita.2G106300	0.00061133	-1.56935	down							Seita.2G264800	0.0020158	1.6334	up		Seita.1G328000	0.027797	-1.03772	down
Seita.2G239500	5.31204e-07	-2.41574	down		Seita.3G195500	0.0390388	-1.59378	down		Seita.2G429400	0.0123093	1.14926	up		Seita.1G357500	4.98857e-15	-3.80951	down		Seita.4G244600	0.0192849	1.62972	up		Seita.2G224000	0.00190096	-2.03161	down		Seita.2G106500	9.51167e-09	-2.67843	down							Seita.2G265500	6.18642e-10	-1.58237	down		Seita.1G329800	2.35506e-07	-2.75538	down
Seita.2G240600	2.25299e-10	-5.19961	down		Seita.3G197300	0.035214	1.59963	up		Seita.2G430500	0.0152038	1.29502	up		Seita.1G357600	4.85533e-09	-1.41946	down		Seita.4G247400	2.44202e-07	-3.0159	down		Seita.2G224300	1.13552e-09	-1.25454	down		Seita.2G106800	4.00989e-85	-5.40053	down							Seita.2G266800	8.09988e-06	1.68414	up		Seita.1G330300	4.05222e-09	-1.8111	down
Seita.2G244300	1.05329e-05	2.49931	up		Seita.3G198100	0.0448439	2.36617	up		Seita.2G431000	0.0187847	-2.26732	down		Seita.1G357900	4.684e-07	1.07096	up		Seita.4G247800	0.0228879	1.41048	up		Seita.2G225100	1.64466e-16	-1.86746	down		Seita.2G107600	3.4731e-05	1.33277	up							Seita.2G267000	1.70875e-13	-2.51073	down		Seita.1G332000	0.0246244	-1.31472	down
Seita.2G245500	0.0128002	-1.41048	down		Seita.3G202800	0.0253359	-1.7674	down		Seita.2G431200	2.14034e-06	-4.6718	down		Seita.1G358400	1.62035e-07	-1.06735	down		Seita.4G248700	0.00843861	-3.0523	down		Seita.2G226300	1.85033e-07	-2.64585	down		Seita.2G107900	1.18885e-07	1.86397	up							Seita.2G267500	0.0340097	3.3994	up		Seita.1G332200	0.000229262	-1.29009	down
Seita.2G246400	3.66958e-13	-7.2542	down		Seita.3G203500	0.00257272	4.99952	up		Seita.2G431300	0.0427301	-1.54098	down		Seita.1G358500	1.78486e-10	-3.00437	down		Seita.4G255100	0.0238296	2.11005	up		Seita.2G228700	0.00617249	3.45621	up		Seita.2G108500	1.73577e-06	-1.11438	down							Seita.2G269900	0.0213638	-1.46386	down		Seita.1G332900	4.37005e-05	-1.80732	down
Seita.2G248900	0.00485299	-1.93493	down		Seita.3G206200	0.00360385	-3.26865	down		Seita.2G431500	1.71269e-30	-4.83434	down		Seita.1G359100	2.21299e-05	-4.00763	down		Seita.4G258300	0.0179468	-1.98191	down		Seita.2G229100	2.42641e-05	-1.5345	down		Seita.2G108900	3.88511e-10	-1.69033	down							Seita.2G270000	1.67018e-05	-3.14453	down		Seita.1G333100	0.00125653	-1.1646	down
Seita.2G249300	6.96822e-11	3.65769	up		Seita.3G208000	0.0281137	-3.91024	down		Seita.2G432200	9.79346e-08	-2.17335	down		Seita.1G359600	7.31915e-06	-1.88666	down		Seita.4G258900	1.10742e-06	2.68888	up		Seita.2G229400	2.75189e-05	-1.1224	down		Seita.2G109700	2.89484e-12	1.55527	up							Seita.2G275200	8.42473e-27	-2.77605	down		Seita.1G333600	1.54816e-09	1.64295	up
Seita.2G249400	5.60564e-10	5.38419	up		Seita.3G209600	0.000633489	-2.89301	down		Seita.2G433600	0.00725213	-3.41799	down		Seita.1G361200	3.496e-05	-1.16057	down		Seita.4G260100	0.0417441	1.40317	up		Seita.2G229700	7.84054e-05	1.54464	up		Seita.2G109800	0.0496123	1.35148	up							Seita.2G275500	3.08468e-15	-5.3597	down		Seita.1G334100	0.000474114	-1.09859	down
Seita.2G249500	0.000392444	-2.33906	down		Seita.3G209700	0.0014442	-3.14695	down		Seita.2G434000	0.0107468	-1.54274	down		Seita.1G362600	8.18094e-11	1.53275	up		Seita.4G260400	1.06406e-06	-3.34927	down		Seita.2G229900	0.000544916	2.08409	up		Seita.2G110700	0.012854	-1.26067	down							Seita.2G275600	0.000201308	-1.38552	down		Seita.1G334400	9.98321e-05	-1.22715	down
Seita.2G250300	0.000137269	-1.79509	down		Seita.3G209800	4.91609e-09	6.98386	up		Seita.2G434300	0.0021195	-1.31887	down		Seita.1G364500	4.01042e-06	2.55732	up		Seita.4G264700	0.0314683	1.425	up		Seita.2G231300	0.000113592	-2.26716	down		Seita.2G111300	5.93323e-05	-2.07666	down							Seita.2G276500	8.20305e-05	-1.38024	down		Seita.1G336200	5.64957e-08	4.61002	up
Seita.2G252900	0.0363778	1.2682	up		Seita.3G209900	0.0459463	2.89121	up		Seita.2G436200	0.00144296	-2.02757	down		Seita.1G364800	0.000445385	-1.56617	down		Seita.4G267900	0.0129546	1.49091	up		Seita.2G232100	4.28011e-06	-1.12065	down		Seita.2G112100	7.45677e-05	-1.55971	down							Seita.2G278400	0.0289651	-1.43176	down		Seita.1G336400	0.00207612	1.02318	up
Seita.2G253700	0.0257291	1.19664	up		Seita.3G216900	0.0300048	-1.66945	down		Seita.2G436800	4.22753e-05	-1.66073	down		Seita.1G367300	1.18529e-15	-1.98029	down		Seita.4G268600	0.0390802	3.63216	up		Seita.2G232600	4.03445e-08	1.2207	up		Seita.2G112200	2.50206e-06	-1.93554	down							Seita.2G278900	2.58758e-06	1.15237	up		Seita.1G336500	2.5594e-06	2.45106	up
Seita.2G254000	0.00012184	-2.01269	down		Seita.3G217700	0.00103986	-3.24766	down		Seita.2G436900	0.0114273	2.02544	up		Seita.1G367400	0.00662863	1.63248	up		Seita.4G268900	9.90342e-11	3.49659	up		Seita.2G235500	0.000100837	1.77057	up		Seita.2G113100	1.17937e-07	-1.92707	down							Seita.2G279000	3.04184e-05	-2.45336	down		Seita.1G336700	1.39719e-06	1.73358	up
Seita.2G255200	0.0031371	-2.22847	down		Seita.3G217800	0.00959196	-2.99149	down		Seita.2G437500	0.000130051	2.91811	up		Seita.1G367600	0.00420615	-1.56812	down		Seita.4G275500	0.0206534	1.45814	up		Seita.2G236000	3.43836e-08	1.33194	up		Seita.2G113500	0.00479695	1.45183	up							Seita.2G281600	1.90508e-08	1.58	up		Seita.1G336800	2.82238e-07	1.98245	up
Seita.2G255300	0.00904992	-1.91152	down		Seita.3G218000	3.10336e-06	-4.7793	down		Seita.2G437900	1.53273e-47	8.90775	up		Seita.1G367700	7.53307e-21	-2.60425	down		Seita.4G279600	0.0453975	1.181	up		Seita.2G236300	5.73438e-07	-2.50749	down		Seita.2G114300	0.000167147	-1.84104	down							Seita.2G282600	1.62809e-38	-4.63956	down		Seita.1G336900	7.5415e-09	-2.71538	down
Seita.2G255500	0.0241186	-1.12328	down		Seita.3G218600	0.00608066	-4.20413	down		Seita.2G438500	1.25298e-07	2.54848	up		Seita.1G368900	1.85095e-05	1.06477	up		Seita.4G281200	0.00688661	1.48276	up		Seita.2G237800	7.66375e-07	-1.18633	down		Seita.2G115100	4.34581e-40	4.36204	up							Seita.2G283000	3.61614e-08	-1.36571	down		Seita.1G337300	0.00690669	1.01246	up
Seita.2G256100	0.0165006	-1.20014	down		Seita.3G221500	0.0386183	1.84412	up		Seita.2G441600	2.16214e-05	-1.69499	down		Seita.1G369100	2.96851e-05	-2.33865	down		Seita.4G281800	0.0258685	-1.39583	down		Seita.2G238800	8.88967e-10	1.86215	up		Seita.2G115500	0.00197417	1.26701	up							Seita.2G284000	0.0115062	1.36441	up		Seita.1G338100	0.000109823	-1.12185	down
Seita.2G256400	4.84453e-14	-5.18953	down		Seita.3G223500	0.0306239	-3.36427	down		Seita.2G441700	4.48287e-06	-1.92128	down		Seita.1G370300	8.76941e-07	-2.49776	down		Seita.4G282100	0.0173108	1.42378	up		Seita.2G239200	9.69497e-12	-1.92328	down		Seita.2G118100	0.0042825	1.08747	up							Seita.2G284500	0.000208013	1.11251	up		Seita.1G338200	6.76781e-05	2.43823	up
Seita.2G256700	9.98751e-24	-4.80058	down		Seita.3G223900	0.0279099	1.84206	up		Seita.2G441900	6.90465e-05	3.21933	up		Seita.1G371900	5.43269e-25	-3.11116	down		Seita.4G283600	3.69526e-05	-2.68131	down		Seita.2G240200	2.70679e-10	-3.36361	down		Seita.2G119600	0.000237074	1.95425	up							Seita.2G285600	0.0158218	1.16593	up		Seita.1G339100	0.000787103	-2.10774	down
Seita.2G256800	0.0066066	-2.70202	down		Seita.3G224000	0.00876319	2.10591	up		Seita.2G442900	6.80668e-05	1.61991	up		Seita.1G372300	3.80799e-09	1.19193	up		Seita.4G284800	0.0261167	-5.64049	down		Seita.2G241600	7.56119e-09	1.19114	up		Seita.2G122700	0.0039457	-2.11108	down							Seita.2G286300	4.83851e-12	-1.67502	down		Seita.1G339900	0.00869335	-5.0476	down
Seita.2G257300	0.0020015	-2.05303	down		Seita.3G224400	0.0486596	-1.84316	down		Seita.2G443600	0.0415733	-2.45881	down		Seita.1G373300	0.042178	-3.618	down		Seita.4G286100	0.0415894	-2.39865	down		Seita.2G241800	1.66295e-12	1.45242	up		Seita.2G124600	4.70573e-14	1.71666	up							Seita.2G286400	0.00227585	1.10593	up		Seita.1G340100	1.13725e-21	-4.49389	down
Seita.2G259000	0.000108144	-2.17278	down		Seita.3G225200	0.00283034	-2.10642	down		Seita.2G443900	0.0355076	1.50271	up		Seita.1G373600	3.13747e-39	2.70632	up		Seita.4G288400	0.0412071	1.62318	up		Seita.2G243100	2.94559e-08	-3.45271	down		Seita.2G125300	5.48308e-06	1.23834	up							Seita.2G287200	0.00219434	-1.69152	down		Seita.1G340300	8.21531e-05	-2.18022	down
Seita.2G260500	0.0383316	-2.50282	down		Seita.3G225800	1.69546e-06	6.29048	up		Seita.2G444000	0.00426844	-1.38054	down		Seita.1G373700	3.67177e-06	2.64768	up		Seita.4G288800	0.00206239	-3.79129	down		Seita.2G243200	1.70271e-10	-3.79115	down		Seita.2G128800	3.33966e-05	-1.0868	down							Seita.2G288000	1.21689e-05	-1.10493	down		Seita.1G340800	0.00051369	-1.59535	down
Seita.2G260700	8.07612e-08	-3.96167	down		Seita.3G226000	0.00145469	-3.01383	down		Seita.3G000700	3.39773e-09	-3.35314	down		Seita.1G375700	9.27756e-07	1.25491	up		Seita.5G002800	0.000247272	-2.0794	down		Seita.2G248100	4.69466e-11	-1.5288	down		Seita.2G129700	0.0193421	1.18074	up							Seita.2G288700	0.00354985	1.78395	up		Seita.1G341000	0.000251837	1.35016	up
Seita.2G264300	0.0218067	-1.95833	down		Seita.3G226700	0.00132032	-3.34317	down		Seita.3G001500	1.34145e-07	-3.15946	down		Seita.1G375800	1.58484e-09	1.35202	up		Seita.5G006500	0.000166393	-4.19853	down		Seita.2G250300	0.00460728	-1.47069	down		Seita.2G132800	0.00287659	-1.59641	down							Seita.2G289200	9.13451e-06	-2.07816	down		Seita.1G341100	0.0290069	-2.61418	down
Seita.2G264800	0.00563614	-1.5865	down		Seita.3G228400	0.00862481	-1.86019	down		Seita.3G003000	0.029765	-2.25618	down		Seita.1G376600	2.68138e-06	-2.70987	down		Seita.5G007500	0.0176147	-4.01587	down		Seita.2G251700	1.34663e-37	-3.79696	down		Seita.2G133200	8.26563e-13	-2.04642	down							Seita.2G289500	0.00393574	-1.01918	down		Seita.1G342400	3.01616e-06	1.90428	up
Seita.2G266300	0.00348757	2.17015	up		Seita.3G229000	1.04929e-07	-4.18403	down		Seita.3G003200	0.0352629	-1.03087	down		Seita.1G378600	0.00659671	-1.50435	down		Seita.5G011800	7.47828e-07	2.76361	up		Seita.2G252100	0.00397741	-1.66681	down		Seita.2G133900	1.22418e-54	-4.47549	down							Seita.2G290300	6.16422e-25	4.42369	up		Seita.1G343300	0.0481741	1.38921	up
Seita.2G268500	5.74882e-10	-2.78115	down		Seita.3G231000	0.0177237	-1.8831	down		Seita.3G003400	0.0421887	4.2281	up		Seita.1G379500	7.2006e-06	1.00672	up		Seita.5G012100	0.0173656	2.3737	up		Seita.2G252500	1.28797e-08	1.61609	up		Seita.2G134000	1.86539e-37	-4.56303	down							Seita.2G291600	0.0397858	-1.13644	down		Seita.1G344900	0.00244489	-4.69673	down
Seita.2G269000	0.00971899	-1.8125	down		Seita.3G233000	0.0412699	-1.55256	down		Seita.3G004500	0.000673282	-1.43296	down		Seita.1G380200	8.89358e-07	-Inf	down		Seita.5G013800	0.0259113	-2.5839	down		Seita.2G253200	2.67e-06	-1.31399	down		Seita.2G135400	1.41489e-28	-3.17582	down							Seita.2G292600	0.00421556	1.11608	up		Seita.1G345400	5.88403e-08	-1.45472	down
Seita.2G269800	3.08274e-11	-3.63861	down		Seita.3G234100	0.0111138	2.20978	up		Seita.3G005100	0.01852	1.07696	up		Seita.2G000200	1.79148e-43	-2.90748	down		Seita.5G016700	0.00105132	3.54877	up		Seita.2G255600	1.58804e-07	1.45843	up		Seita.2G136700	3.37342e-12	6.1151	up							Seita.2G293600	5.71847e-38	5.75827	up		Seita.1G345900	1.27494e-12	-2.95479	down
Seita.2G269900	8.1096e-09	-4.47196	down		Seita.3G235400	0.00101813	-2.98567	down		Seita.3G006400	0.00419341	2.01605	up		Seita.2G000800	0.000191262	-2.41859	down		Seita.5G020500	0.010232	1.59843	up		Seita.2G255800	0.00454063	1.14292	up		Seita.2G137100	3.74092e-05	-1.84657	down							Seita.2G294300	0.0013269	-1.31771	down		Seita.1G346600	0.000164919	1.17814	up
Seita.2G270000	1.04459e-08	-2.84478	down		Seita.3G235800	0.0157868	-2.44354	down		Seita.3G007200	0.0193912	-2.64675	down		Seita.2G000900	0.00648404	-1.01557	down		Seita.5G021300	0.0272425	1.76281	up		Seita.2G256500	3.14761e-07	-1.1244	down		Seita.2G138200	5.5838e-05	-1.98088	down							Seita.2G294500	2.29379e-09	-2.07821	down		Seita.1G346700	3.06256e-14	2.66888	up
Seita.2G271100	0.0385132	-1.54713	down		Seita.3G236600	0.000814928	-5.30652	down		Seita.3G008300	0.0304355	1.29953	up		Seita.2G001400	0.00609412	-1.04019	down		Seita.5G022400	0.0111178	-6.76311	down		Seita.2G256700	5.99027e-07	-2.90564	down		Seita.2G138400	7.41352e-12	-1.66094	down							Seita.2G298300	2.72786e-05	-1.57579	down		Seita.1G347600	0.000395291	-1.06078	down
Seita.2G272000	0.0438209	1.51557	up		Seita.3G242900	0.00350398	2.11616	up		Seita.3G010000	0.0118526	-1.3237	down		Seita.2G001800	0.030885	1.21171	up		Seita.5G026700	0.0238296	2.18322	up		Seita.2G257300	0.0021983	1.72608	up		Seita.2G139500	1.33445e-09	-1.34711	down							Seita.2G299900	6.7391e-16	-2.94555	down		Seita.1G348800	0.00940208	-1.03358	down
Seita.2G276000	0.00103023	-4.58277	down		Seita.3G243700	0.0126412	3.31286	up		Seita.3G011900	0.0223239	-1.46681	down		Seita.2G002000	7.43113e-06	-1.19168	down		Seita.5G026800	0.0435487	9.18984	up		Seita.2G257500	6.34636e-14	-2.19535	down		Seita.2G141500	4.17822e-74	4.60831	up							Seita.2G300800	5.84809e-05	1.09872	up		Seita.1G349000	0.00752617	1.13648	up
Seita.2G276300	3.58852e-09	-3.1879	down		Seita.3G245100	0.0397944	-2.4581	down		Seita.3G013100	1.06647e-07	-2.13079	down		Seita.2G002700	8.03879e-06	-1.89316	down		Seita.5G028500	9.61362e-05	-3.11989	down		Seita.2G257700	8.38067e-06	-1.52591	down		Seita.2G144400	1.24898e-45	-3.55529	down							Seita.2G302000	4.07234e-19	-2.1509	down		Seita.1G350600	3.69059e-05	1.31177	up
Seita.2G276400	1.35377e-08	-4.10174	down		Seita.3G258400	0.0403224	1.80129	up		Seita.3G014100	1.6023e-06	2.31114	up		Seita.2G003100	9.02058e-05	-1.57578	down		Seita.5G029100	0.00936585	-5.24155	down		Seita.2G258900	1.58639e-09	2.65297	up		Seita.2G144900	5.98508e-32	-3.80495	down							Seita.2G303000	7.23347e-05	1.8537	up		Seita.1G351500	0.00376843	1.57218	up
Seita.2G276800	0.00037038	-2.61115	down		Seita.3G260100	0.00604133	-5.35991	down		Seita.3G014700	0.0459361	-2.93086	down		Seita.2G004800	8.32776e-06	1.22363	up		Seita.5G031700	0.0177445	-1.8202	down		Seita.2G259100	4.1274e-08	-1.81815	down		Seita.2G145600	0.00936817	1.08735	up							Seita.2G304200	1.25336e-07	1.67689	up		Seita.1G352100	2.45467e-05	-1.77453	down
Seita.2G277900	0.0389793	-1.08967	down		Seita.3G262600	0.0033701	3.60158	up		Seita.3G015800	0.000669343	2.55726	up		Seita.2G006600	8.48716e-13	-3.4135	down		Seita.5G032600	0.0354069	1.99982	up		Seita.2G259500	0.000107093	1.2786	up		Seita.2G145700	4.34831e-41	-3.82147	down							Seita.2G304400	9.81371e-05	1.03933	up		Seita.1G352900	0.0159562	-2.23348	down
Seita.2G278500	0.0386457	-1.18837	down		Seita.3G262900	5.90775e-08	Inf	up		Seita.3G016700	0.00172608	-1.33735	down		Seita.2G008100	0.000812474	1.08833	up		Seita.5G034800	0.0215345	3.05183	up		Seita.2G260500	6.1661e-20	2.66023	up		Seita.2G145800	1.08036e-61	-3.99837	down							Seita.2G304700	2.67445e-08	2.75976	up		Seita.1G353500	1.34822e-12	1.94156	up
Seita.2G280700	1.27816e-06	-3.78158	down		Seita.3G263800	1.52597e-22	-7.91834	down		Seita.3G017100	4.27515e-15	3.70293	up		Seita.2G011500	0.000357973	1.14699	up		Seita.5G034900	0.0351722	1.77195	up		Seita.2G261500	4.08246e-07	-1.05249	down		Seita.2G145900	9.53074e-10	-3.90866	down							Seita.2G305900	2.03135e-11	1.75229	up		Seita.1G353700	0.0355497	1.11864	up
Seita.2G282100	0.0284343	1.08919	up		Seita.3G264300	4.95182e-11	4.83335	up		Seita.3G019000	0.0109912	-1.5453	down		Seita.2G012900	1.08595e-13	-1.74792	down		Seita.5G036200	8.48004e-11	6.56233	up		Seita.2G262300	6.70554e-07	2.50501	up		Seita.2G148000	0.00903883	1.13892	up							Seita.2G307800	1.61021e-08	-1.61067	down		Seita.1G354100	1.6095e-08	-2.11219	down
Seita.2G282700	0.0012546	-1.59724	down		Seita.3G265100	0.0006818	-2.90354	down		Seita.3G020400	0.00374505	-1.30412	down		Seita.2G013400	0.00451966	-1.04427	down		Seita.5G038300	3.24562e-05	3.11565	up		Seita.2G262400	0.000318032	1.05547	up		Seita.2G149300	4.09465e-16	1.99057	up							Seita.2G307900	8.68715e-09	-1.42484	down		Seita.1G354800	1.36763e-10	-1.69978	down
Seita.2G283800	0.017295	-3.23355	down		Seita.3G266300	0.00670431	-2.4198	down		Seita.3G023100	0.0130559	-1.06965	down		Seita.2G013500	6.35308e-15	1.65602	up		Seita.5G039000	0.00365731	-1.66684	down		Seita.2G263000	4.06586e-10	-2.62315	down		Seita.2G150600	3.20393e-16	2.83838	up							Seita.2G308200	2.60138e-21	-2.49358	down		Seita.1G355300	1.39686e-11	-2.15293	down
Seita.2G285400	0.000126648	-2.23709	down		Seita.3G266900	0.0166474	1.87957	up		Seita.3G026900	7.75487e-09	-3.87295	down		Seita.2G013600	6.45895e-05	-1.83312	down		Seita.5G039100	0.000910528	1.91346	up		Seita.2G263800	5.57607e-05	-4.92224	down		Seita.2G151100	1.4203e-08	-2.27718	down							Seita.2G308600	3.68528e-23	-2.41496	down		Seita.1G356800	0.00478882	1.66505	up
Seita.2G286900	0.00778953	-1.56724	down		Seita.3G267100	0.00150429	-2.78729	down		Seita.3G028800	0.0357486	1.47675	up		Seita.2G013700	1.89051e-17	-Inf	down		Seita.5G042400	5.29904e-05	Inf	up		Seita.2G265500	2.4663e-11	-1.83001	down		Seita.2G151800	3.76709e-07	1.14875	up							Seita.2G308700	7.49837e-07	-1.24467	down		Seita.1G357500	3.9916e-58	-4.73043	down
Seita.2G287100	0.0351026	-1.55096	down		Seita.3G270400	0.0244833	-2.96165	down		Seita.3G028900	0.0401885	-1.01932	down		Seita.2G014200	2.4759e-37	6.07802	up		Seita.5G042600	0.0206534	Inf	up		Seita.2G266800	7.92159e-06	1.51446	up		Seita.2G153900	2.05342e-10	2.48978	up							Seita.2G312000	4.02481e-07	-3.04057	down		Seita.1G357600	0.000642947	-1.02029	down
Seita.2G290000	3.2011e-05	-3.052	down		Seita.3G270500	0.0415043	-1.70555	down		Seita.3G030200	1.74855e-06	3.50322	up		Seita.2G015400	6.79321e-12	-1.69445	down		Seita.5G046600	0.0296186	-2.12161	down		Seita.2G267000	0.0268503	-1.41108	down		Seita.2G156100	0.0123461	-1.1553	down							Seita.2G312300	1.06155e-05	-1.15046	down		Seita.1G357800	2.95388e-11	-1.81935	down
Seita.2G290300	0.000947124	1.8859	up		Seita.3G271500	0.0372117	-1.71398	down		Seita.3G030400	0.0248118	1.18493	up		Seita.2G015900	0.00393301	-1.53636	down		Seita.5G047700	0.0347405	-1.8565	down		Seita.2G267500	2.21494e-14	5.56743	up		Seita.2G156300	8.26765e-20	5.69218	up							Seita.2G313800	1.15599e-14	-5.05835	down		Seita.1G357900	0.000128445	1.04252	up
Seita.2G291600	0.0103566	-1.85809	down		Seita.3G272900	0.0328422	-1.91002	down		Seita.3G031600	0.027356	1.4324	up		Seita.2G016100	0.0003375	1.3521	up		Seita.5G052700	0.00180752	2.72094	up		Seita.2G268500	1.90638e-07	-1.09795	down		Seita.2G157400	2.31707e-05	-1.28328	down							Seita.2G314900	3.34495e-06	1.36611	up		Seita.1G358500	0.0281131	-1.0607	down
Seita.2G292900	0.00163496	-1.70574	down		Seita.3G276100	0.0100874	3.24657	up		Seita.3G034800	0.00438142	3.30954	up		Seita.2G016600	1.40541e-07	-3.20415	down		Seita.5G064800	8.80176e-07	-4.23886	down		Seita.2G270000	0.035436	-1.18816	down		Seita.2G158500	0.0033474	1.04703	up							Seita.2G318000	1.1875e-14	-1.85358	down		Seita.1G359100	3.28962e-18	-3.67807	down
Seita.2G293100	0.00778953	-1.77266	down		Seita.3G277300	0.00805979	2.19111	up		Seita.3G037000	0.000193195	-1.70581	down		Seita.2G016900	4.14468e-07	-3.06464	down		Seita.5G066800	0.0351722	-3.84041	down		Seita.2G271100	6.91951e-08	-3.43932	down		Seita.2G159000	3.505e-06	1.04574	up							Seita.2G318800	2.14524e-05	-1.0695	down		Seita.1G360100	0.0106415	-1.41563	down
Seita.2G297500	1.73909e-05	-3.11224	down		Seita.3G278400	1.82973e-07	-4.30403	down		Seita.3G037800	0.0316439	-1.33521	down		Seita.2G018200	4.68168e-09	-2.84111	down		Seita.5G071300	0.00698662	-2.2326	down		Seita.2G275200	4.40584e-13	-1.99659	down		Seita.2G159400	2.47819e-42	-4.91497	down							Seita.2G320000	0.000388188	1.29495	up		Seita.1G361500	0.000336658	-1.30977	down
Seita.2G298400	9.04687e-06	-2.1094	down		Seita.3G279900	0.0367444	-1.97306	down		Seita.3G040300	0.000548968	-2.59363	down		Seita.2G019500	0.00229966	1.43879	up		Seita.5G072100	0.00319726	-1.86974	down		Seita.2G275500	5.77756e-06	-4.10779	down		Seita.2G159600	2.11381e-33	6.05567	up							Seita.2G320400	6.05934e-07	-2.71477	down		Seita.1G362400	1.16231e-05	1.62534	up
Seita.2G299400	0.0315771	-4.65974	down		Seita.3G280200	0.0191128	2.53675	up		Seita.3G041600	0.0231154	1.94855	up		Seita.2G021200	0.0214352	1.13825	up		Seita.5G073000	0.0296186	3.64855	up		Seita.2G275600	2.48683e-07	-2.13881	down		Seita.2G159900	1.33143e-08	2.45338	up							Seita.2G323100	1.35288e-06	-2.00763	down		Seita.1G362500	1.57103e-07	-1.65557	down
Seita.2G299900	4.15764e-06	-2.48285	down		Seita.3G280500	0.0285299	-1.66288	down		Seita.3G042200	0.000319122	-3.64267	down		Seita.2G022100	1.28287e-33	3.86972	up		Seita.5G073800	0.0211211	-1.40342	down		Seita.2G276400	0.000126269	-2.0163	down		Seita.2G160100	1.01596e-05	-2.32698	down							Seita.2G323200	0.0282243	1.11942	up		Seita.1G362600	0.000103915	1.21396	up
Seita.2G300000	1.3397e-06	-3.2397	down		Seita.3G283100	0.00256835	-2.48045	down		Seita.3G043600	0.0264852	1.06816	up		Seita.2G023300	0.00275219	-1.71339	down		Seita.5G074000	0.0351722	1.31427	up		Seita.2G276500	4.32553e-23	-2.30171	down		Seita.2G164500	0.031641	1.44131	up							Seita.2G324100	4.94199e-28	3.3177	up		Seita.1G364800	9.12622e-07	-2.42339	down
Seita.2G300300	5.81552e-05	1.82869	up		Seita.3G283600	0.0277509	-3.04738	down		Seita.3G045000	0.0207417	2.63951	up		Seita.2G024600	8.9385e-09	-5.31034	down		Seita.5G075200	5.09058e-11	Inf	up		Seita.2G276600	1.33049e-07	1.10169	up		Seita.2G168000	1.97355e-15	3.26243	up							Seita.2G324300	0.000148714	-1.02562	down		Seita.1G366800	0.0051381	-1.66128	down
Seita.2G300900	0.00362609	-2.02092	down		Seita.3G284500	0.00540466	-3.29908	down		Seita.3G047600	0.000510132	2.03256	up		Seita.2G024900	1.32832e-21	2.08618	up		Seita.5G075600	0.0078038	-1.8087	down		Seita.2G277400	0.000747682	2.21333	up		Seita.2G169200	0.0242127	-1.14195	down							Seita.2G324800	8.60146e-10	3.26924	up		Seita.1G367300	5.11443e-16	-2.21373	down
Seita.2G303000	0.00340047	1.76509	up		Seita.3G285000	0.000623421	-3.1824	down		Seita.3G050300	0.0322651	-1.0091	down		Seita.2G026700	1.45495e-08	-1.18222	down		Seita.5G076100	0.00116599	1.82217	up		Seita.2G281600	3.84536e-09	1.4356	up		Seita.2G169700	8.35241e-13	1.58229	up							Seita.2G325000	0.000608775	-1.7153	down		Seita.1G367400	0.00271254	1.50358	up
Seita.2G303100	0.00373978	2.1634	up		Seita.3G286800	0.00079641	-3.74735	down		Seita.3G053600	0.00120244	-1.53132	down		Seita.2G027000	2.29221e-09	-2.10053	down		Seita.5G079600	0.0280216	-3.1986	down		Seita.2G282600	1.50561e-61	-4.00218	down		Seita.2G174500	3.40274e-10	-1.88207	down							Seita.2G325500	4.90849e-08	-1.46949	down		Seita.1G367700	0.0321496	-2.24461	down
Seita.2G304400	0.00128101	1.51467	up		Seita.3G287100	0.000969189	-2.48794	down		Seita.3G053900	0.0290075	-1.55646	down		Seita.2G029300	3.83919e-16	-2.6204	down		Seita.5G085100	0.0015085	-2.08884	down		Seita.2G282700	2.24006e-05	-1.69963	down		Seita.2G175800	5.11623e-15	-1.90228	down							Seita.2G325700	1.93392e-05	-1.16239	down		Seita.1G367900	0.00106171	1.65952	up
Seita.2G304500	0.00927428	-2.58208	down		Seita.3G291600	0.00316772	-5.26305	down		Seita.3G054100	0.0447107	-1.71937	down		Seita.2G030300	0.00224003	-1.68998	down		Seita.5G085900	0.0149121	-4.38286	down		Seita.2G284000	0.000104725	1.34002	up		Seita.2G176500	6.04415e-05	1.39403	up							Seita.2G330500	2.85456e-12	-1.89849	down		Seita.1G368400	3.04542e-05	-1.13649	down
Seita.2G304700	0.0378085	4.20333	up		Seita.3G294700	0.0025742	-2.97036	down		Seita.3G055400	7.85601e-13	3.50464	up		Seita.2G030600	4.2925e-29	-4.1971	down		Seita.5G087500	0.0202342	1.76434	up		Seita.2G284100	1.2834e-07	3.23353	up		Seita.2G176800	1.01549e-07	-1.2311	down							Seita.2G332300	0.0456633	-1.40986	down		Seita.1G368900	0.000175707	2.23152	up
Seita.2G305200	0.0399647	1.051	up		Seita.3G298100	2.08918e-06	Inf	up		Seita.3G056000	0.0200592	-1.13206	down		Seita.2G031200	2.87492e-13	-1.82029	down		Seita.5G090200	0.000237205	-2.39052	down		Seita.2G284200	6.29617e-07	1.04397	up		Seita.2G177500	1.41931e-13	1.67581	up							Seita.2G332700	0.000236162	-1.16295	down		Seita.1G369100	2.58411e-24	-5.52186	down
Seita.2G307300	0.0462782	1.62813	up		Seita.3G299300	0.00973184	2.031	up		Seita.3G056400	0.000838944	-2.19807	down		Seita.2G033100	0.0076074	-1.25338	down		Seita.5G092400	5.31793e-09	4.23705	up		Seita.2G285600	3.88541e-22	2.23769	up		Seita.2G178100	1.5518e-06	1.17156	up							Seita.2G337800	2.44017e-07	-1.77306	down		Seita.1G369200	4.02081e-11	1.79842	up
Seita.2G307400	1.28274e-06	-4.35421	down		Seita.3G299800	0.0473448	-2.74276	down		Seita.3G057700	7.59731e-05	-1.68103	down		Seita.2G033500	0.000333681	-1.57578	down		Seita.5G093000	1.2562e-07	5.63411	up		Seita.2G286400	0.0347807	1.10302	up		Seita.2G179100	0.0223854	-1.02939	down							Seita.2G337900	0.00202591	-1.5201	down		Seita.1G369300	4.29651e-21	2.85135	up
Seita.2G308000	0.00012078	-2.78854	down		Seita.3G311200	0.0283826	1.99029	up		Seita.3G057800	1.50104e-13	-2.93959	down		Seita.2G034500	2.26253e-17	-4.8407	down		Seita.5G095900	0.0133976	-3.30037	down		Seita.2G287600	1.38267e-19	1.84238	up		Seita.2G179500	1.41357e-36	3.00968	up							Seita.2G338600	0.0155656	-1.07094	down		Seita.1G370300	7.56443e-10	-2.66026	down
Seita.2G309200	0.000160018	1.85488	up		Seita.3G312200	0.0393237	1.98209	up		Seita.3G060000	0.0160866	-1.2698	down		Seita.2G035900	3.09625e-20	2.16407	up		Seita.5G096100	0.0129748	2.12328	up		Seita.2G288900	0.0105282	-1.01609	down		Seita.2G179600	1.22032e-10	-1.54298	down							Seita.2G341000	0.00408822	1.82585	up		Seita.1G371900	8.79049e-45	-3.97502	down
Seita.2G315100	0.0302959	-1.58488	down		Seita.3G312700	0.00947206	1.88019	up		Seita.3G063000	0.00702478	2.1609	up		Seita.2G036400	7.87084e-11	-4.17121	down		Seita.5G097400	0.0163833	-2.71249	down		Seita.2G289200	0.00790419	-1.76028	down		Seita.2G180100	1.83406e-05	1.01042	up							Seita.2G341100	3.24257e-05	1.78791	up		Seita.1G372500	0.0408782	1.28844	up
Seita.2G315900	6.08402e-08	-4.20672	down		Seita.3G314400	0.0293531	-1.92343	down		Seita.3G063200	0.00632194	-1.52527	down		Seita.2G037200	8.7024e-07	1.00632	up		Seita.5G102900	0.031966	1.8904	up		Seita.2G290300	5.63241e-102	6.51684	up		Seita.2G180300	2.72692e-06	1.10148	up							Seita.2G342300	7.36608e-06	-2.41435	down		Seita.1G372800	0.000675508	-1.6842	down
Seita.2G316000	0.00302232	-1.39838	down		Seita.3G316100	1.92714e-06	7.03522	up		Seita.3G063400	0.00416398	-1.28187	down		Seita.2G038000	0.0201212	1.12607	up		Seita.5G104100	0.0148932	-1.47779	down		Seita.2G291100	0.0136039	1.15462	up		Seita.2G180500	0.024469	1.00025	up							Seita.2G343000	1.36391e-47	-4.06024	down		Seita.1G373600	4.2514e-47	4.65512	up
Seita.2G317900	0.0401558	-1.99695	down		Seita.3G318000	0.0331065	1.96726	up		Seita.3G065900	0.0235498	-1.03766	down		Seita.2G038100	1.14713e-06	1.43684	up		Seita.5G104500	0.0210116	-1.68565	down		Seita.2G291600	0.000228356	-1.62248	down		Seita.2G182000	0.000501688	-1.61616	down							Seita.2G343100	5.30112e-26	-2.64994	down		Seita.1G373700	6.26519e-06	2.78013	up
Seita.2G318200	0.00657978	-1.5252	down		Seita.3G321200	0.00356251	-2.89954	down		Seita.3G068800	0.0384285	-2.59153	down		Seita.2G038200	4.26065e-05	-1.13509	down		Seita.5G106800	0.0429605	2.31426	up		Seita.2G292900	0.00379933	-1.71031	down		Seita.2G183100	1.45833e-12	-5.17577	down							Seita.2G344400	7.80805e-05	-1.24578	down		Seita.1G374300	0.000123435	-1.99282	down
Seita.2G320200	0.00114427	-4.11463	down		Seita.3G321600	0.0323078	-2.57069	down		Seita.3G068900	0.0269555	-2.69816	down		Seita.2G038900	1.10062e-49	-3.18274	down		Seita.5G115800	0.0335076	1.75831	up		Seita.2G293100	6.36453e-13	-2.16194	down		Seita.2G183300	0.000220762	-1.24465	down							Seita.2G345500	1.05699e-07	-1.29582	down		Seita.1G375700	1.28197e-07	2.24536	up
Seita.2G324100	3.21889e-05	-2.34934	down		Seita.3G322300	0.00842996	5.84628	up		Seita.3G072600	0.00550606	-1.17847	down		Seita.2G039200	9.40054e-05	-3.21075	down		Seita.5G117500	0.00393289	-4.28083	down		Seita.2G293600	1.01045e-17	4.38978	up		Seita.2G185300	4.78291e-09	-1.35339	down							Seita.2G349000	0.0152669	-1.47609	down		Seita.1G376600	0.0230626	-1.25058	down
Seita.2G324600	0.00054923	-3.41837	down		Seita.3G322600	0.00288411	-3.10101	down		Seita.3G072700	0.00827541	-6.26393	down		Seita.2G041600	6.16945e-22	-4.36024	down		Seita.5G119600	0.0189509	-1.54803	down		Seita.2G294300	0.000107106	-1.48418	down		Seita.2G186000	0.00478835	1.41863	up							Seita.2G349700	1.14329e-10	-1.76804	down		Seita.1G379700	1.54941e-11	-1.78184	down
Seita.2G325500	0.010096	-1.28506	down		Seita.3G324900	0.0175624	-2.84711	down		Seita.3G073100	1.3335e-05	-2.03422	down		Seita.2G041700	1.43761e-20	-1.99208	down		Seita.5G119800	1.36089e-08	7.05529	up		Seita.2G294500	1.057e-12	-2.65282	down		Seita.2G187000	1.36831e-05	-1.2313	down							Seita.2G350100	3.63413e-05	-1.05658	down		Seita.1G380700	0.0464784	1.13206	up
Seita.2G325700	0.000474427	-1.6069	down		Seita.3G326300	1.886e-05	-4.68835	down		Seita.3G074300	2.32532e-05	-2.01945	down		Seita.2G042300	1.7802e-05	-6.19753	down		Seita.5G121000	0.0150605	-2.20495	down		Seita.2G298700	1.51232e-15	-1.68934	down		Seita.2G187300	3.87235e-22	-3.39214	down							Seita.2G350200	2.81368e-10	-1.74417	down		Seita.2G000200	2.11166e-41	-4.24137	down
Seita.2G330800	5.67275e-07	2.2748	up		Seita.3G328100	8.8524e-11	5.26365	up		Seita.3G074700	2.24134e-05	4.80914	up		Seita.2G042800	0.00107063	1.60256	up		Seita.5G123400	0.0136125	-2.10457	down		Seita.2G299900	7.62099e-08	-2.3125	down		Seita.2G187400	0.00616631	-1.73157	down							Seita.2G350400	0.00825363	-1.28192	down		Seita.2G000400	5.36709e-09	-1.6417	down
Seita.2G332000	1.31821e-08	2.55769	up		Seita.3G328200	1.9622e-11	6.02624	up		Seita.3G075100	1.95962e-05	-1.71756	down		Seita.2G043500	2.47277e-20	-6.00142	down		Seita.5G123900	0.0241105	-1.77786	down		Seita.2G300500	0.0151073	-1.22594	down		Seita.2G187800	5.43041e-30	-3.30709	down							Seita.2G351400	0.000396394	1.737	up		Seita.2G000800	0.00248746	-1.51824	down
Seita.2G332600	0.00739145	-1.40599	down		Seita.3G330100	0.0341722	2.11011	up		Seita.3G075400	0.00244851	-1.57585	down		Seita.2G043900	4.08298e-30	-5.23122	down		Seita.5G124200	0.0457247	1.66721	up		Seita.2G300800	4.15986e-05	1.00998	up		Seita.2G187900	1.48854e-15	-2.63826	down							Seita.2G351600	1.51717e-11	-2.13221	down		Seita.2G000900	7.94463e-08	-1.7841	down
Seita.2G334000	0.00248133	-3.04024	down		Seita.3G331900	0.035836	-2.40507	down		Seita.3G075500	0.00120681	-2.21753	down		Seita.2G044200	8.16416e-49	-7.91818	down		Seita.5G124500	0.00549983	-2.8466	down		Seita.2G302000	0.0231631	3.1397	up		Seita.2G188200	8.80114e-07	-1.19975	down							Seita.2G351700	5.59441e-09	-1.43751	down		Seita.2G001400	1.48014e-08	-2.09599	down
Seita.2G334100	0.0372124	-1.19703	down		Seita.3G332100	0.0284594	-5.2952	down		Seita.3G075600	2.40359e-05	1.87291	up		Seita.2G044400	1.05318e-11	-1.64531	down		Seita.5G125500	0.0118773	-2.39391	down		Seita.2G302200	0.000126756	1.40074	up		Seita.2G188300	4.8751e-07	3.92588	up							Seita.2G351900	0.0110925	-1.29706	down		Seita.2G002700	0.0030642	-1.38521	down
Seita.2G334600	0.023563	1.12412	up		Seita.3G332700	0.0374408	-2.49224	down		Seita.3G077100	2.18319e-06	2.77856	up		Seita.2G044900	1.53802e-11	-1.79562	down		Seita.5G128100	0.0144669	-1.55602	down		Seita.2G303000	1.32986e-08	1.46519	up		Seita.2G188800	8.28553e-07	-1.17633	down							Seita.2G352400	1.27424e-29	7.65831	up		Seita.2G003800	0.000370869	1.43888	up
Seita.2G335500	0.0363739	1.0367	up		Seita.3G335400	0.035836	-2.20561	down		Seita.3G077600	0.00376976	1.30717	up		Seita.2G045200	2.93967e-10	-3.24326	down		Seita.5G129700	0.00671839	-1.60485	down		Seita.2G303400	0.0337736	-1.2802	down		Seita.2G189100	3.40896e-05	-1.42772	down							Seita.2G352700	5.48232e-06	-5.91976	down		Seita.2G005900	0.0153076	1.3623	up
Seita.2G336100	0.000188436	-2.48455	down		Seita.3G338400	4.05281e-05	-2.87909	down		Seita.3G079000	5.41832e-08	-4.19341	down		Seita.2G048000	0.000392012	1.28913	up		Seita.5G131400	0.000157076	2.34039	up		Seita.2G304200	1.05706e-16	2.39553	up		Seita.2G190100	3.36443e-06	-1.56616	down							Seita.2G352900	2.67561e-14	-4.01154	down		Seita.2G006200	0.0229935	1.79236	up
Seita.2G336200	7.74283e-12	-5.34984	down		Seita.3G340100	0.00046587	-8.05735	down		Seita.3G079300	8.53838e-12	-3.01547	down		Seita.2G048800	1.2699e-06	-2.3524	down		Seita.5G134300	0.00931933	2.36853	up		Seita.2G304400	1.0365e-05	1.06514	up		Seita.2G192100	2.69472e-06	1.05972	up							Seita.2G353300	2.55143e-05	1.0934	up		Seita.2G006500	6.94122e-05	-2.37144	down
Seita.2G336400	1.75522e-09	-2.6798	down		Seita.3G340900	0.00705443	-2.49438	down		Seita.3G082100	0.00341148	1.21513	up		Seita.2G049100	8.18934e-17	-5.83383	down		Seita.5G134500	0.00365731	1.8363	up		Seita.2G304700	6.6874e-12	2.88943	up		Seita.2G192400	2.35103e-05	-1.85389	down							Seita.2G353800	0.00020866	2.68877	up		Seita.2G006600	1.97401e-05	-2.19464	down
Seita.2G337400	0.00202243	-2.12984	down		Seita.3G343500	0.0307185	2.46818	up		Seita.3G084000	8.03257e-07	2.84058	up		Seita.2G049800	2.54683e-12	-3.25899	down		Seita.5G134600	0.00288807	-1.74388	down		Seita.2G305400	3.48381e-08	1.99341	up		Seita.2G193000	7.26103e-43	3.13854	up							Seita.2G354900	0.0192096	-1.14149	down		Seita.2G007800	0.0413132	-1.27466	down
Seita.2G339400	2.3649e-06	-3.61122	down		Seita.3G346000	0.00745815	-2.27685	down		Seita.3G084100	0.00106206	2.68858	up		Seita.2G050000	4.60386e-08	-2.91659	down		Seita.5G135700	0.0343076	2.19857	up		Seita.2G305900	1.35766e-36	2.77268	up		Seita.2G193200	3.30209e-13	2.2923	up							Seita.2G355000	5.45861e-14	-2.13819	down		Seita.2G008400	0.0110588	1.12053	up
Seita.2G339600	5.73043e-05	-2.68646	down		Seita.3G347500	2.51018e-08	-4.98456	down		Seita.3G087100	5.16216e-11	2.57426	up		Seita.2G050200	1.35868e-10	-1.82977	down		Seita.5G136100	0.0272522	1.7938	up		Seita.2G307800	1.13945e-11	-1.77158	down		Seita.2G193900	3.14873e-23	2.23503	up							Seita.2G356500	4.56441e-06	-1.66919	down		Seita.2G008500	3.80389e-05	1.56425	up
Seita.2G339800	0.00114672	-3.30495	down		Seita.3G349500	0.00106548	-2.86682	down		Seita.3G090200	0.0107709	-2.08062	down		Seita.2G050700	0.00859729	-1.38977	down		Seita.5G137900	0.022955	1.62597	up		Seita.2G307900	1.67711e-23	-2.03581	down		Seita.2G196600	0.0101952	1.08258	up							Seita.2G358000	1.2246e-13	-1.90231	down		Seita.2G009500	0.00138141	-1.58615	down
Seita.2G340000	6.53406e-05	-5.13631	down		Seita.3G350800	0.00330043	-2.01951	down		Seita.3G090400	0.0412253	-1.11214	down		Seita.2G051800	6.73721e-06	1.00064	up		Seita.5G140700	0.0457247	-1.73937	down		Seita.2G308200	3.06617e-10	-1.73023	down		Seita.2G196700	5.98268e-06	1.06871	up							Seita.2G359800	8.22066e-10	-1.52522	down		Seita.2G010500	0.00117286	-2.7002	down
Seita.2G341200	0.00144706	-2.44513	down		Seita.3G353600	0.0278854	-1.80579	down		Seita.3G093500	3.20553e-10	2.98581	up		Seita.2G054900	7.8789e-08	-3.59872	down		Seita.5G142700	0.00263618	-2.17168	down		Seita.2G308600	6.88384e-17	-1.77482	down		Seita.2G197500	1.62163e-13	3.39687	up							Seita.2G359900	5.32538e-06	-1.98145	down		Seita.2G010900	8.82416e-05	-2.29461	down
Seita.2G341500	0.00405833	-1.65643	down		Seita.3G355400	2.01557e-06	-3.30585	down		Seita.3G093600	4.79517e-09	5.48557	up		Seita.2G058700	0.0378814	-1.21611	down		Seita.5G145700	3.96997e-06	6.20425	up		Seita.2G308700	0.00850318	-1.22693	down		Seita.2G198800	1.05508e-11	-2.27217	down							Seita.2G360500	5.04571e-05	-1.34424	down		Seita.2G011300	0.0484985	-1.38408	down
Seita.2G341700	0.000511404	-2.36379	down		Seita.3G357700	0.000263322	3.61156	up		Seita.3G093900	7.56221e-05	-1.64592	down		Seita.2G061200	9.17889e-11	1.32862	up		Seita.5G145900	0.000452342	2.96268	up		Seita.2G309200	5.92869e-08	1.14249	up		Seita.2G199100	3.48808e-20	-3.36677	down							Seita.2G360800	0.000281569	-1.81642	down		Seita.2G012900	0.00135995	-2.61805	down
Seita.2G342200	0.00166862	-3.51838	down		Seita.3G364000	3.4216e-07	-3.63744	down		Seita.3G095700	0.0257019	1.02771	up		Seita.2G061700	6.01789e-09	-1.48932	down		Seita.5G150100	5.52691e-05	2.23543	up		Seita.2G310000	5.17148e-08	-2.42153	down		Seita.2G199400	2.88694e-07	-1.37094	down							Seita.2G363900	8.21049e-05	1.41124	up		Seita.2G013400	0.00814053	-1.03995	down
Seita.2G342300	1.30841e-11	-4.4509	down		Seita.3G364700	0.0371166	-2.24311	down		Seita.3G096700	0.000205066	1.72187	up		Seita.2G063000	0.00230884	1.39749	up		Seita.5G155100	0.0301467	-3.16553	down		Seita.2G310900	0.000714543	-1.4395	down		Seita.2G199800	3.51859e-05	-1.77065	down							Seita.2G364700	0.0110349	1.53839	up		Seita.2G013600	0.00164727	-1.7245	down
Seita.2G342500	6.45348e-05	-4.8853	down		Seita.3G366300	0.0171404	2.9766	up		Seita.3G097200	1.2505e-05	-1.92878	down		Seita.2G063300	1.76623e-06	-1.31454	down		Seita.5G157900	6.2135e-05	-4.68074	down		Seita.2G311700	7.37233e-05	-1.00868	down		Seita.2G200200	2.60842e-16	2.52867	up							Seita.2G366500	4.34125e-05	-1.14677	down		Seita.2G013700	1.37085e-17	-4.65497	down
Seita.2G343200	1.09976e-08	2.55607	up		Seita.3G368700	0.0120364	1.86132	up		Seita.3G097400	0.00492515	-1.195	down		Seita.2G065300	9.63664e-20	-2.24322	down		Seita.5G164100	0.000121522	-2.31778	down		Seita.2G312000	3.3554e-05	-2.49107	down		Seita.2G200800	2.63079e-37	3.00039	up							Seita.2G366600	3.07244e-11	-2.12078	down		Seita.2G014000	0.00534672	1.3414	up
Seita.2G344400	0.025713	-1.17316	down		Seita.3G373100	0.0334841	2.0418	up		Seita.3G097900	0.0122926	-1.11716	down		Seita.2G066200	0.0154789	1.13882	up		Seita.5G166300	0.0463363	7.41624	up		Seita.2G312300	1.86295e-06	-1.06426	down		Seita.2G202300	7.48417e-16	-4.46908	down							Seita.2G367800	0.00490888	-1.86093	down		Seita.2G014200	5.14227e-43	5.97821	up
Seita.2G345500	0.0251497	-1.10512	down		Seita.3G374000	0.00349724	-2.25455	down		Seita.3G098100	3.30824e-06	-1.90675	down		Seita.2G066800	0.00730382	1.53366	up		Seita.5G170600	0.0453177	1.46063	up		Seita.2G313200	1.21612e-11	-1.40553	down		Seita.2G203000	0.00168824	-1.33623	down							Seita.2G368100	2.86429e-09	-1.44202	down		Seita.2G015400	2.39464e-19	-2.4596	down
Seita.2G347100	1.55354e-05	-2.69409	down		Seita.3G375500	0.0072814	-1.94867	down		Seita.3G098700	5.45786e-05	-1.63992	down		Seita.2G067500	0.000386918	-1.78621	down		Seita.5G178800	0.00587506	2.56695	up		Seita.2G313300	6.6162e-06	-1.57722	down		Seita.2G203100	1.93688e-10	-3.31015	down							Seita.2G368800	0.0033589	1.4124	up		Seita.2G015900	0.0059753	-1.42894	down
Seita.2G348400	0.011057	-1.73478	down		Seita.3G377100	0.000667026	3.47868	up		Seita.3G099000	5.88667e-32	-6.06356	down		Seita.2G067800	0.00956164	-1.48718	down		Seita.5G180900	0.0420167	-1.82792	down		Seita.2G313400	3.64584e-15	-1.6565	down		Seita.2G205400	6.61324e-07	-1.11016	down							Seita.2G373600	7.01132e-08	2.57718	up		Seita.2G016600	4.80031e-10	-3.6392	down
Seita.2G350200	0.00380363	-1.81096	down		Seita.3G379400	0.0434266	-1.65679	down		Seita.3G101300	0.0422458	2.20816	up		Seita.2G068200	8.15389e-53	-3.36093	down		Seita.5G182500	0.0306657	5.98724	up		Seita.2G313800	0.00757807	-4.23251	down		Seita.2G206200	2.60523e-07	1.27611	up							Seita.2G373900	0.00014494	-1.4592	down		Seita.2G018200	4.61659e-14	-3.60386	down
Seita.2G350300	0.0066066	-1.6855	down		Seita.3G379500	0.0308731	-1.67277	down		Seita.3G101900	0.0326244	-1.05106	down		Seita.2G069000	1.26434e-33	-8.841	down		Seita.5G184000	0.00118376	-3.62877	down		Seita.2G314900	8.36808e-06	1.2003	up		Seita.2G206700	1.8887e-09	1.49279	up							Seita.2G374500	2.96792e-08	-1.5032	down		Seita.2G020200	2.9916e-13	-5.64161	down
Seita.2G350400	0.000428822	-1.96604	down		Seita.3G379900	0.0180153	-3.18782	down		Seita.3G102000	0.00070486	-1.99114	down		Seita.2G069100	6.24214e-16	-4.35457	down		Seita.5G185100	0.0304068	-2.55604	down		Seita.2G318000	1.20941e-18	-1.79219	down		Seita.2G207900	0.0246939	-1.22646	down							Seita.2G381600	1.06992e-16	2.02878	up		Seita.2G021200	0.00621971	1.33468	up
Seita.2G351000	0.0458293	-3.16616	down		Seita.3G380200	0.00141162	-2.44565	down		Seita.3G102200	0.00031244	3.05897	up		Seita.2G069900	7.95364e-06	-1.64217	down		Seita.5G189400	0.0226237	-2.20646	down		Seita.2G320000	4.44562e-59	3.57344	up		Seita.2G208500	0.000451519	1.08055	up							Seita.2G381700	6.66944e-05	1.66255	up		Seita.2G021900	0.000272836	1.25511	up
Seita.2G351200	0.00119896	-2.57139	down		Seita.3G382000	0.0241739	1.87957	up		Seita.3G103300	0.0014034	1.64535	up		Seita.2G070100	2.18175e-06	-2.59897	down		Seita.5G192100	0.00113896	-4.41956	down		Seita.2G323100	7.07109e-06	-1.50917	down		Seita.2G208800	0.00301042	-1.60149	down							Seita.2G382600	1.98859e-12	4.55167	up		Seita.2G022100	6.6374e-08	3.21365	up
Seita.2G352000	0.0312665	1.23252	up		Seita.3G383500	0.004207	-3.53447	down		Seita.3G103400	0.0273581	-1.02531	down		Seita.2G070300	6.65278e-08	-2.97288	down		Seita.5G194000	0.0136038	-1.97624	down		Seita.2G323900	0.00158167	-1.88093	down		Seita.2G209900	1.42837e-05	-1.4327	down							Seita.2G383100	0.000311497	-2.02728	down		Seita.2G023000	0.0256791	1.1468	up
Seita.2G352200	0.00202828	-1.75316	down		Seita.3G383700	0.00174652	-7.27002	down		Seita.3G104000	0.0367922	1.16484	up		Seita.2G070700	0.0139123	1.11365	up		Seita.5G195700	4.23734e-08	-5.50698	down		Seita.2G324100	2.62314e-24	2.64206	up		Seita.2G210800	1.02356e-11	2.12457	up							Seita.2G385300	0.00246824	-1.08461	down		Seita.2G023400	0.00404383	1.61221	up
Seita.2G352300	0.0256229	-1.30123	down		Seita.3G384000	0.00828059	-3.48889	down		Seita.3G105500	1.43088e-07	-2.80519	down		Seita.2G071100	0.00383627	-1.0005	down		Seita.5G201500	0.00250836	1.93115	up		Seita.2G324400	1.33049e-06	2.79763	up		Seita.2G211000	0.00680578	1.15388	up							Seita.2G386200	0.0317988	-3.1299	down		Seita.2G024800	4.16798e-06	-2.46932	down
Seita.2G353400	0.010117	3.20413	up		Seita.3G386300	0.0072814	-4.65936	down		Seita.3G108200	1.02246e-05	3.48086	up		Seita.2G071600	3.28613e-05	2.41784	up		Seita.5G202300	0.000240748	2.34054	up		Seita.2G324500	8.97117e-05	-1.08305	down		Seita.2G211600	7.71647e-06	2.17235	up							Seita.2G387600	0.0106129	1.66378	up		Seita.2G025400	0.00756405	-1.22738	down
Seita.2G353800	0.000107238	2.96623	up		Seita.3G390200	0.00743883	3.12901	up		Seita.3G109600	0.00637953	2.26782	up		Seita.2G072100	7.01675e-12	-1.50958	down		Seita.5G203400	0.01628	-2.97638	down		Seita.2G324600	0.0132944	1.28122	up		Seita.2G212900	1.5014e-18	-4.3785	down							Seita.2G389600	0.00282683	-1.80962	down		Seita.2G025600	0.00322721	-1.6527	down
Seita.2G355900	0.0425339	1.76484	up		Seita.3G391000	0.0130983	4.6915	up		Seita.3G110100	0.000288885	1.49231	up		Seita.2G073400	0.0228518	1.46396	up		Seita.5G207000	0.0321412	1.9141	up		Seita.2G325000	1.90943e-08	-2.54568	down		Seita.2G213800	5.15275e-24	-2.33832	down							Seita.2G391600	4.07847e-10	-1.95532	down		Seita.2G025700	1.10238e-05	-2.12268	down
Seita.2G356200	0.0303762	1.26602	up		Seita.3G391200	0.0150598	-5.62215	down		Seita.3G110200	5.26693e-30	4.69066	up		Seita.2G075000	0.00543006	-1.03403	down		Seita.5G216900	0.0351722	2.47623	up		Seita.2G325700	9.18347e-16	-1.74968	down		Seita.2G216500	2.67298e-05	1.02185	up							Seita.2G392200	0.000124329	-1.01157	down		Seita.2G025800	1.38912e-10	-2.59726	down
Seita.2G356900	2.95083e-19	-5.94425	down		Seita.3G392900	0.0127215	2.9366	up		Seita.3G110300	4.01682e-06	3.7139	up		Seita.2G076300	0.0255523	-1.19897	down		Seita.5G219300	4.98277e-05	4.72874	up		Seita.2G329100	0.00912657	-1.407	down		Seita.2G216900	3.19433e-10	-3.01513	down							Seita.2G392500	0.00147251	1.31403	up		Seita.2G026900	5.46692e-07	1.65983	up
Seita.2G357100	0.0484642	-1.02322	down		Seita.3G394400	0.010636	-2.10676	down		Seita.3G111800	0.0214082	1.07005	up		Seita.2G077100	2.61645e-08	1.21103	up		Seita.5G230500	0.0143135	-1.75432	down		Seita.2G329700	0.0180071	-1.25409	down		Seita.2G217500	3.23136e-28	-3.17265	down							Seita.2G392700	9.59829e-08	-1.3603	down		Seita.2G027000	2.90007e-16	-2.15914	down
Seita.2G358300	5.38466e-07	-3.94307	down		Seita.3G398000	0.00188582	-3.34526	down		Seita.3G112700	0.000136712	-1.91133	down		Seita.2G077200	2.21899e-08	-3.07421	down		Seita.5G233300	0.0435575	-2.12284	down		Seita.2G330500	5.70059e-11	-1.51327	down		Seita.2G218700	2.71965e-19	2.90523	up							Seita.2G395000	9.24908e-18	2.69904	up		Seita.2G029300	0.000492011	-1.58516	down
Seita.2G358400	5.33441e-08	-4.17827	down		Seita.3G398300	0.000301454	-3.46143	down		Seita.3G112800	1.24845e-05	-1.78815	down		Seita.2G078000	1.97419e-09	1.25582	up		Seita.5G234500	0.0139432	1.46799	up		Seita.2G330600	3.84127e-11	-1.36973	down		Seita.2G218800	3.7556e-07	1.70467	up							Seita.2G396300	0.0495162	1.30348	up		Seita.2G030500	0.000305265	-1.56354	down
Seita.2G360500	0.0244436	-1.54272	down		Seita.3G399900	0.00885817	7.50855	up		Seita.3G113000	6.3203e-05	-1.70453	down		Seita.2G078100	0.0182756	-1.48722	down		Seita.5G234700	0.0192896	1.8595	up		Seita.2G331600	0.000940999	-1.04639	down		Seita.2G219500	0.0025328	-1.3635	down							Seita.2G397700	0.00302017	1.62847	up		Seita.2G030600	1.25496e-12	-3.19619	down
Seita.2G360800	8.94416e-05	-2.8254	down		Seita.3G405100	0.00145745	3.42926	up		Seita.3G113500	9.49999e-07	Inf	up		Seita.2G078400	3.06019e-18	-Inf	down		Seita.5G236400	0.0299954	-2.97649	down		Seita.2G332300	0.010757	-1.87309	down		Seita.2G219600	2.05364e-19	-2.23134	down							Seita.2G397800	1.56908e-06	-2.44417	down		Seita.2G030700	0.000630406	-1.3061	down
Seita.2G361800	0.000557565	-1.80008	down		Seita.3G408200	3.24353e-06	Inf	up		Seita.3G114000	1.5166e-10	-3.26041	down		Seita.2G079200	2.24665e-07	1.10576	up		Seita.5G238600	0.036628	-2.35272	down		Seita.2G332600	5.0265e-10	-1.62193	down		Seita.2G219700	6.15392e-20	-2.13072	down							Seita.2G398500	2.83436e-37	-3.66249	down		Seita.2G031100	0.0045035	3.35225	up
Seita.2G363100	0.0199654	-1.31438	down		Seita.3G409400	0.0371696	2.30446	up		Seita.3G114800	0.00186312	-2.23452	down		Seita.2G079600	5.45699e-05	1.13456	up		Seita.5G238700	0.0143135	-1.95671	down		Seita.2G332800	0.00759243	-1.37703	down		Seita.2G220500	0.0165201	-1.74003	down							Seita.2G401700	9.78682e-10	-1.68773	down		Seita.2G031600	0.0374599	1.12964	up
Seita.2G363400	0.0447715	-1.32239	down		Seita.4G003600	0.000637941	-2.49572	down		Seita.3G116400	0.0207772	1.32776	up		Seita.2G080200	0.00158692	2.07422	up		Seita.5G239100	0.0154626	-6.43187	down		Seita.2G333400	8.02829e-05	2.65586	up		Seita.2G221700	4.89896e-16	1.79844	up							Seita.2G402000	0.000179808	-1.0172	down		Seita.2G031700	0.010788	1.29118	up
Seita.2G364000	0.000259393	2.67465	up		Seita.4G005300	2.21659e-06	-3.34918	down		Seita.3G117900	0.000691719	2.58154	up		Seita.2G080900	2.79102e-07	-1.05533	down		Seita.5G242400	0.0263632	6.26435	up		Seita.2G335600	4.58783e-07	2.07624	up		Seita.2G221800	6.33079e-06	-1.4043	down							Seita.2G402800	1.76243e-23	2.8409	up		Seita.2G031900	0.0297789	1.09441	up
Seita.2G364700	0.000246712	-3.86164	down		Seita.4G006300	3.80747e-05	-3.30494	down		Seita.3G119200	0.00388392	-1.31345	down		Seita.2G081000	7.49981e-122	5.74763	up		Seita.5G242700	0.041792	-1.37697	down		Seita.2G337800	3.08653e-12	-1.48289	down		Seita.2G222800	0.000199484	-1.27792	down							Seita.2G404500	0.00204505	-1.0019	down		Seita.2G032400	0.00767483	1.58871	up
Seita.2G365000	0.00318271	-4.03551	down		Seita.4G006500	0.000114716	-6.77715	down		Seita.3G120200	0.0415343	1.03416	up		Seita.2G081200	0.000118639	1.29296	up		Seita.5G243200	0.0103828	1.8036	up		Seita.2G337900	0.0202951	-1.0857	down		Seita.2G223700	1.73756e-24	-2.30886	down							Seita.2G408200	0.0129564	1.09067	up		Seita.2G033100	0.000266297	-1.53816	down
Seita.2G365400	0.00656348	-1.96768	down		Seita.4G006600	0.00607653	-2.49367	down		Seita.3G123300	0.000420865	-1.47701	down		Seita.2G082300	5.49755e-08	1.26996	up		Seita.5G243400	0.0103748	1.69137	up		Seita.2G339900	0.00288834	-1.556	down		Seita.2G224000	8.63367e-09	-1.82815	down							Seita.2G410600	2.08089e-06	-1.43583	down		Seita.2G033200	2.19317e-10	-1.68496	down
Seita.2G365700	0.00819472	-3.6505	down		Seita.4G007000	0.0244833	-1.7677	down		Seita.3G124500	0.00208632	1.82309	up		Seita.2G082600	8.83931e-05	-2.46177	down		Seita.5G243500	0.000831583	-1.86061	down		Seita.2G340100	1.59473e-07	-2.32263	down		Seita.2G224300	7.31966e-16	-1.91991	down							Seita.2G415300	4.87279e-12	-2.34534	down		Seita.2G033500	1.10713e-11	-2.72794	down
Seita.2G365800	1.28447e-05	-2.01819	down		Seita.4G008000	0.035214	-2.71852	down		Seita.3G126100	0.0294969	-2.02774	down		Seita.2G084300	0.00210616	1.04408	up		Seita.5G246200	8.97073e-08	-Inf	down		Seita.2G340200	9.94003e-10	-2.1311	down		Seita.2G224500	0.0159186	-1.6311	down							Seita.2G415500	0.0137964	-1.02534	down		Seita.2G034500	7.91197e-06	-3.7762	down
Seita.2G367800	0.0466461	-1.06837	down		Seita.4G008400	0.00132645	2.53699	up		Seita.3G126900	1.00319e-14	-3.18446	down		Seita.2G086200	0.00161278	-1.66077	down		Seita.5G246600	0.000200301	-2.08354	down		Seita.2G340400	2.34892e-18	-3.23032	down		Seita.2G226300	0.0418758	1.0009	up							Seita.2G416100	0.00191121	-1.93685	down		Seita.2G036400	9.22139e-28	-4.95269	down
Seita.2G368400	0.000749304	1.75032	up		Seita.4G010800	0.0206962	-2.18213	down		Seita.3G128500	0.000199397	-1.52087	down		Seita.2G087900	2.31451e-11	2.2338	up		Seita.5G248000	0.000257578	Inf	up		Seita.2G340600	0.0196068	-1.19225	down		Seita.2G226400	3.11455e-09	-1.38124	down							Seita.2G418200	6.28271e-05	1.01281	up		Seita.2G037600	0.00489359	1.08939	up
Seita.2G368900	1.46676e-13	-4.16218	down		Seita.4G011200	2.72022e-05	3.49587	up		Seita.3G129300	0.000753922	-1.58579	down		Seita.2G090000	1.83425e-09	1.63912	up		Seita.5G250100	0.000502452	-3.8051	down		Seita.2G340700	0.00496136	1.43899	up		Seita.2G226600	0.0202388	1.31884	up							Seita.2G418300	1.4468e-07	3.48039	up		Seita.2G038000	0.0116079	3.24502	up
Seita.2G369900	0.0324898	-1.16956	down		Seita.4G012900	0.0157875	-2.4622	down		Seita.3G130700	0.0100341	1.24816	up		Seita.2G090200	0.00155622	2.07131	up		Seita.5G251200	0.0491051	1.22321	up		Seita.2G341300	6.08547e-07	-1.08968	down		Seita.2G227100	0.00298694	1.44267	up							Seita.2G419000	6.54509e-06	-1.11397	down		Seita.2G038300	0.0112091	1.39928	up
Seita.2G370900	2.32877e-05	-1.99416	down		Seita.4G013200	0.0452156	-1.60373	down		Seita.3G131900	0.00138375	-1.32601	down		Seita.2G090300	4.867e-07	-1.16228	down		Seita.5G253900	0.0416099	1.88451	up		Seita.2G342700	2.74262e-05	1.67104	up		Seita.2G228300	1.16272e-11	-1.87778	down							Seita.2G422000	2.85384e-08	-1.38649	down		Seita.2G038900	1.19812e-05	-2.7104	down
Seita.2G371400	1.34424e-07	2.40657	up		Seita.4G013400	0.00447652	-3.0653	down		Seita.3G132400	9.04787e-20	-3.7421	down		Seita.2G092300	4.52519e-33	2.69337	up		Seita.5G254800	0.0227601	-3.98235	down		Seita.2G343000	6.31917e-50	-3.45511	down		Seita.2G229100	9.2878e-13	-3.376	down							Seita.2G422400	1.54522e-10	-3.99685	down		Seita.2G039200	2.97436e-19	-3.9696	down
Seita.2G371600	6.19907e-06	-3.31375	down		Seita.4G013500	6.07635e-05	-3.02908	down		Seita.3G132500	8.29953e-06	2.51634	up		Seita.2G094000	0.00308962	-2.11631	down		Seita.5G254900	0.0235782	-3.14934	down		Seita.2G343200	0.0152691	1.34185	up		Seita.2G229500	2.33011e-15	1.77255	up							Seita.2G423300	2.57734e-05	-1.09283	down		Seita.2G040600	0.00358371	2.54092	up
Seita.2G372600	1.86026e-06	-3.4522	down		Seita.4G013900	0.00056581	-4.20969	down		Seita.3G132800	9.04687e-05	2.17771	up		Seita.2G095400	9.07154e-14	2.28849	up		Seita.5G256300	0.00283467	1.83992	up		Seita.2G344200	7.43826e-09	-2.45053	down		Seita.2G229900	4.1257e-16	4.57767	up							Seita.2G426500	2.55359e-08	-1.64555	down		Seita.2G040700	0.000466289	1.75841	up
Seita.2G372800	0.000248756	-1.92602	down		Seita.4G014000	0.00073229	-2.83571	down		Seita.3G133900	3.32405e-18	-4.99377	down		Seita.2G095700	2.26081e-05	-1.33791	down		Seita.5G257700	0.0268574	1.49663	up		Seita.2G345500	1.19129e-18	-1.7888	down		Seita.2G230700	2.42993e-05	-2.10129	down							Seita.2G429000	3.04514e-08	-2.22959	down		Seita.2G041600	2.60754e-24	-3.37662	down
Seita.2G373000	0.0244898	1.12653	up		Seita.4G014100	7.16186e-06	-6.92257	down		Seita.3G134100	0.0111724	-1.13918	down		Seita.2G097900	1.84485e-22	-3.79317	down		Seita.5G262400	3.65461e-05	-2.76809	down		Seita.2G347100	0.00549616	-1.63219	down		Seita.2G230800	2.96899e-05	-1.94381	down							Seita.2G429800	4.39113e-06	-1.47575	down		Seita.2G042900	0.000109027	1.2185	up
Seita.2G374300	0.00535219	-1.66119	down		Seita.4G024000	0.00193234	2.18605	up		Seita.3G136400	1.25148e-10	3.24864	up		Seita.2G098500	5.2724e-08	-1.22961	down		Seita.5G263000	0.0111297	-3.69962	down		Seita.2G347300	4.41499e-07	1.1278	up		Seita.2G231400	3.00082e-15	-2.35854	down							Seita.2G431100	1.23467e-13	-5.04891	down		Seita.2G043500	8.20373e-34	-4.64893	down
Seita.2G379300	4.74896e-06	-4.4155	down		Seita.4G026700	2.92775e-05	-2.77976	down		Seita.3G136500	0.00244851	2.41152	up		Seita.2G099400	6.66256e-08	-2.77469	down		Seita.5G263500	0.0182607	1.52514	up		Seita.2G347600	0.000115583	1.47679	up		Seita.2G231700	0.0168479	1.37149	up							Seita.2G431200	3.81582e-07	-4.91036	down		Seita.2G043900	5.49116e-37	-4.24086	down
Seita.2G379400	0.0031335	-3.41383	down		Seita.4G028400	0.0327786	-2.6277	down		Seita.3G137100	5.94667e-10	3.23005	up		Seita.2G099800	0.00226957	-1.73205	down		Seita.5G263600	0.00943892	-1.63771	down		Seita.2G348200	2.74426e-07	-1.31035	down		Seita.2G231800	5.97569e-12	-2.56699	down							Seita.2G431400	0.00105946	-1.7203	down		Seita.2G044200	7.00874e-58	-4.67501	down
Seita.2G379600	1.73339e-12	-4.57967	down		Seita.4G029000	0.000170982	-5.02211	down		Seita.3G138200	0.0192762	2.66781	up		Seita.2G100300	8.78272e-10	-1.65127	down		Seita.5G266600	0.0322348	1.36608	up		Seita.2G348400	0.000145969	-1.57217	down		Seita.2G232600	1.15323e-07	-1.67596	down							Seita.2G431500	7.04977e-13	-3.80054	down		Seita.2G044400	0.00948147	1.25467	up
Seita.2G379700	6.48181e-13	-7.17122	down		Seita.4G029200	9.0755e-07	-3.40232	down		Seita.3G138700	4.67817e-14	4.4987	up		Seita.2G100600	3.96972e-07	1.13013	up		Seita.5G270700	0.00357118	-2.52849	down		Seita.2G348600	0.0238679	-1.14549	down		Seita.2G232900	0.000688138	-1.21986	down							Seita.2G433600	0.00120603	-1.91478	down		Seita.2G044900	6.35598e-15	-2.11545	down
Seita.2G379900	1.83199e-22	-5.32583	down		Seita.4G029800	0.00193234	-6.24351	down		Seita.3G139000	8.99341e-05	1.61935	up		Seita.2G101500	0.0242607	1.09618	up		Seita.5G271200	0.0425928	-3.22506	down		Seita.2G350200	0.0118628	-1.47579	down		Seita.2G233700	5.23509e-10	-1.8848	down							Seita.2G435100	0.00154748	-1.42439	down		Seita.2G046000	9.00262e-05	-1.11049	down
Seita.2G380400	0.000114657	-3.59188	down		Seita.4G030400	0.000506203	-4.08861	down		Seita.3G139400	0.0240943	1.86062	up		Seita.2G101800	0.0237798	1.30902	up		Seita.5G279000	0.00478503	-4.63304	down		Seita.2G350400	0.00167517	-1.5936	down		Seita.2G234000	0.0125961	-1.32686	down							Seita.2G435800	0.0250047	-1.41972	down		Seita.2G049100	5.59637e-22	-4.48572	down
Seita.2G381500	3.02904e-05	4.68946	up		Seita.4G032700	0.0464151	1.59759	up		Seita.3G140700	1.43291e-09	2.49366	up		Seita.2G102600	2.7193e-07	-1.07401	down		Seita.5G280700	0.0457464	2.42384	up		Seita.2G351600	1.08457e-09	-1.68315	down		Seita.2G234300	2.117e-06	-1.79571	down							Seita.2G436000	0.000508516	3.06556	up		Seita.2G049800	8.80511e-08	-1.46201	down
Seita.2G381700	0.0131073	1.39768	up		Seita.4G033400	0.031576	-2.46902	down		Seita.3G141400	0.00178646	-1.47669	down		Seita.2G102800	4.70445e-09	-3.93984	down		Seita.5G284400	6.82084e-05	4.09123	up		Seita.2G351900	7.59141e-05	-2.93633	down		Seita.2G234400	9.4072e-08	-2.27618	down							Seita.2G436200	2.83584e-10	-1.52818	down		Seita.2G050000	0.00368443	-1.4589	down
Seita.2G381800	0.00463563	-2.4252	down		Seita.4G034700	0.0087017	1.98003	up		Seita.3G142400	1.11283e-09	2.83709	up		Seita.2G103600	4.27473e-13	-2.75663	down		Seita.5G284700	0.0465515	-1.92868	down		Seita.2G352000	4.82929e-06	1.52335	up		Seita.2G234500	3.46521e-07	-1.88802	down							Seita.2G436600	1.74991e-17	-2.17818	down		Seita.2G050800	0.000176742	-1.96907	down
Seita.2G382900	0.00204302	-1.44301	down		Seita.4G040600	0.0123854	2.78249	up		Seita.3G143800	0.00843785	-1.44118	down		Seita.2G104700	2.04052e-06	-2.82862	down		Seita.5G284900	0.0385284	1.38034	up		Seita.2G352400	3.93552e-39	Inf	up		Seita.2G234700	3.27434e-11	-2.9097	down							Seita.2G436800	6.45589e-06	-1.16244	down		Seita.2G051300	1.50613e-15	-4.62764	down
Seita.2G384700	2.94831e-05	-1.97925	down		Seita.4G041200	0.0361975	1.74975	up		Seita.3G144000	0.00380317	1.35762	up		Seita.2G104900	0.00902286	1.46897	up		Seita.5G285100	8.85359e-05	-2.30313	down		Seita.2G352700	3.32575e-100	-8.00864	down		Seita.2G234800	6.15644e-21	-4.1673	down							Seita.2G437500	0.0163222	1.4068	up		Seita.2G054900	6.69999e-45	-4.25384	down
Seita.2G386900	0.00416575	-2.17346	down		Seita.4G041800	0.00776246	-2.58244	down		Seita.3G144600	0.0326439	1.09149	up		Seita.2G106200	4.1619e-08	-1.45001	down		Seita.5G285200	0.00814091	2.83421	up		Seita.2G352900	0.0059488	-2.14625	down		Seita.2G237100	4.13057e-12	2.37108	up							Seita.2G437900	1.04546e-37	Inf	up		Seita.2G056400	0.0364312	1.07778	up
Seita.2G387900	0.000768044	-1.7046	down		Seita.4G042000	0.0278747	-3.69577	down		Seita.3G145000	0.0257237	1.72036	up		Seita.2G106500	3.20489e-07	-4.06556	down		Seita.5G291400	0.000235964	3.12966	up		Seita.2G353300	1.76317e-11	1.39153	up		Seita.2G237400	4.1622e-05	2.07422	up							Seita.2G438500	9.48916e-39	3.72102	up		Seita.2G057000	0.0447559	-1.46215	down
Seita.2G390100	1.87763e-05	-2.66931	down		Seita.4G046000	0.00650045	-2.16493	down		Seita.3G146300	0.0293268	-1.21762	down		Seita.2G106800	2.70339e-07	-3.72575	down		Seita.5G298300	0.00633778	4.04238	up		Seita.2G353400	1.08986e-59	3.94942	up		Seita.2G238300	0.0189972	-1.31217	down							Seita.2G441600	8.09577e-09	-1.45058	down		Seita.2G058300	1.85035e-18	2.41841	up
Seita.2G390800	0.00974848	-1.53214	down		Seita.4G049800	0.0376373	1.74045	up		Seita.3G146700	0.0295711	-1.16945	down		Seita.2G107200	3.48159e-05	-1.12397	down		Seita.5G298800	8.65371e-16	-8.47091	down		Seita.2G353800	3.6233e-12	1.71461	up		Seita.2G238400	2.62675e-11	-1.47323	down							Seita.2G441700	1.26331e-07	-1.6314	down		Seita.2G058400	0.016076	1.08053	up
Seita.2G390900	0.0459783	1.17641	up		Seita.4G051800	0.046606	1.96776	up		Seita.3G146800	0.0476775	-1.8296	down		Seita.2G107300	1.90219e-30	-2.70709	down		Seita.5G303900	0.000413269	-4.6712	down		Seita.2G354900	0.0200766	-1.17489	down		Seita.2G238900	3.41867e-07	-1.76315	down							Seita.2G443600	0.00012648	-2.04357	down		Seita.2G058800	0.00268706	1.82533	up
Seita.2G392500	0.035241	-1.11158	down		Seita.4G051900	0.026169	-1.89602	down		Seita.3G150400	0.0489127	1.26725	up		Seita.2G107500	4.72509e-05	-1.12636	down		Seita.5G304300	0.0243837	-4.35964	down		Seita.2G355700	0.00695261	-1.50826	down		Seita.2G239500	0.000521245	-1.832	down							Seita.3G000700	0.000287485	-2.34872	down		Seita.2G058900	0.000371131	1.01802	up
Seita.2G392800	1.03919e-08	-7.48087	down		Seita.4G055500	0.00921583	-3.07529	down		Seita.3G150900	0.0267579	1.60742	up		Seita.2G107600	1.6878e-06	1.16537	up		Seita.5G307100	0.0280901	-2.54836	down		Seita.2G356500	3.58791e-06	-1.10482	down		Seita.2G240100	2.74857e-07	-3.91459	down							Seita.3G001500	0.00123827	-2.40877	down		Seita.2G060400	0.000261015	-1.00583	down
Seita.2G396200	0.0106506	-1.49919	down		Seita.4G056000	0.00843965	-2.37381	down		Seita.3G151000	2.55359e-07	2.06541	up		Seita.2G107900	2.36426e-09	1.73419	up		Seita.5G307500	1.73813e-08	3.80977	up		Seita.2G356700	0.000112627	-1.15853	down		Seita.2G240600	3.40995e-07	-2.85685	down							Seita.3G002200	0.00671739	2.64397	up		Seita.2G061200	2.58216e-08	1.47981	up
Seita.2G397500	0.00200554	-3.22859	down		Seita.4G058700	1.92443e-26	9.52413	up		Seita.3G151100	8.62371e-08	4.01938	up		Seita.2G108900	1.61808e-44	-3.99324	down		Seita.5G309000	0.000387473	4.00448	up		Seita.2G357000	0.000172272	1.11403	up		Seita.2G242200	3.74545e-08	1.23027	up							Seita.3G002300	7.56179e-06	-1.1049	down		Seita.2G061400	0.0471597	1.13628	up
Seita.2G399000	1.46922e-06	-3.77439	down		Seita.4G067800	0.0185287	-3.11713	down		Seita.3G152100	0.0436057	1.45473	up		Seita.2G109300	0.0373567	-1.12617	down		Seita.5G309600	0.00167737	3.2894	up		Seita.2G358000	2.50448e-06	-1.08308	down		Seita.2G242400	3.81622e-07	1.22963	up							Seita.3G003000	6.32863e-05	-3.73772	down		Seita.2G061700	0.000795848	-1.02665	down
Seita.2G399100	0.000967158	-4.85065	down		Seita.4G068600	0.0222946	-2.13819	down		Seita.3G153400	0.000351764	-3.3273	down		Seita.2G109700	1.24122e-16	1.72899	up		Seita.5G311200	0.0456657	1.92143	up		Seita.2G358200	1.28437e-09	2.17399	up		Seita.2G243500	0.0238746	1.06677	up							Seita.3G003800	1.21317e-05	-2.6247	down		Seita.2G062100	0.0456686	-1.09284	down
Seita.2G399700	6.48904e-06	3.25558	up		Seita.4G069300	0.0185287	-2.25336	down		Seita.3G154700	0.00565492	1.53383	up		Seita.2G109800	0.00234357	2.96166	up		Seita.5G312500	0.0124555	-1.67421	down		Seita.2G359800	6.19393e-09	-1.19123	down		Seita.2G244300	2.65672e-08	1.7732	up							Seita.3G005100	1.85748e-05	-1.2862	down		Seita.2G063200	0.000487045	-1.88171	down
Seita.2G400500	8.91475e-05	-2.94813	down		Seita.4G072600	0.0395777	1.563	up		Seita.3G156000	0.000962284	2.56749	up		Seita.2G110700	4.86022e-09	-3.72025	down		Seita.5G315800	2.96893e-15	-7.54465	down		Seita.2G360500	0.000909072	-1.15442	down		Seita.2G246400	1.63802e-10	-4.29203	down							Seita.3G005400	2.88997e-14	-1.85649	down		Seita.2G063300	1.04589e-10	-1.82295	down
Seita.2G400600	0.00175136	-2.40167	down		Seita.4G072800	0.0153258	2.39989	up		Seita.3G157100	0.0368744	1.71652	up		Seita.2G112100	5.66192e-10	-3.247	down		Seita.5G316700	0.00975535	-1.7277	down		Seita.2G360800	5.78223e-06	-2.55252	down		Seita.2G246500	0.00662741	-1.03087	down							Seita.3G006100	0.0238848	-1.34538	down		Seita.2G065300	1.27914e-19	-2.83092	down
Seita.2G400700	2.30451e-09	-4.93741	down		Seita.4G074700	0.0166904	-2.69688	down		Seita.3G157400	0.000141682	7.60673	up		Seita.2G112200	0.0216135	-1.18366	down		Seita.5G319200	0.00122037	-3.6069	down		Seita.2G361800	1.34548e-07	-1.14952	down		Seita.2G248700	0.00271486	1.95642	up							Seita.3G007200	4.53698e-07	-3.04474	down		Seita.2G066800	0.000184793	2.19358	up
Seita.2G400800	0.00424323	-1.46565	down		Seita.4G075000	0.0307185	1.726	up		Seita.3G157500	0.00459395	4.58376	up		Seita.2G113100	1.66368e-12	-3.4308	down		Seita.5G322200	0.00414678	-Inf	down		Seita.2G363900	0.000291103	1.65105	up		Seita.2G249200	0.000108918	-1.06723	down							Seita.3G007600	2.01509e-07	1.34357	up		Seita.2G067500	0.00212603	-1.62362	down
Seita.2G401000	0.00132226	2.39777	up		Seita.4G075400	0.0240636	1.97053	up		Seita.3G158600	0.00208182	-1.43698	down		Seita.2G113500	5.40122e-05	1.71272	up		Seita.5G322500	0.00627786	2.66013	up		Seita.2G365000	0.0100922	1.23222	up		Seita.2G249300	2.23856e-14	6.27444	up							Seita.3G007800	0.0272429	1.3603	up		Seita.2G067800	0.0286847	-1.08269	down
Seita.2G401100	0.0101693	1.82942	up		Seita.4G077000	4.01739e-05	-3.01722	down		Seita.3G161500	0.0184856	1.07662	up		Seita.2G113700	1.57735e-08	1.43707	up		Seita.5G323600	0.0177871	1.41599	up		Seita.2G365600	2.81814e-05	1.00226	up		Seita.2G249500	3.01061e-12	-2.40268	down							Seita.3G008400	0.00153549	1.78451	up		Seita.2G068200	1.97632e-19	-2.4922	down
Seita.2G401300	0.000405217	-1.84393	down		Seita.4G079400	0.0119756	-4.39104	down		Seita.3G161900	0.0173742	1.06873	up		Seita.2G114300	1.00865e-09	-3.77116	down		Seita.5G323800	0.0157833	-1.58827	down		Seita.2G366600	1.05494e-06	-1.36331	down		Seita.2G250300	3.01562e-08	-2.40605	down							Seita.3G009800	0.0125394	1.87023	up		Seita.2G068400	0.0171818	3.03169	up
Seita.2G401400	2.54539e-08	-2.57968	down		Seita.4G082600	0.032748	-2.59679	down		Seita.3G162000	0.0298073	-1.64081	down		Seita.2G115100	2.1912e-35	6.16916	up		Seita.5G326900	0.0266092	-2.84417	down		Seita.2G367800	0.00206009	-1.26269	down		Seita.2G251700	5.44981e-21	-2.12145	down							Seita.3G009900	1.20865e-05	-1.086	down		Seita.2G069000	2.80278e-62	-7.13096	down
Seita.2G402000	0.0100227	-1.21989	down		Seita.4G085500	0.00101813	-3.76936	down		Seita.3G162400	0.00166238	9.58511	up		Seita.2G115800	0.0241081	-1.30979	down		Seita.5G329900	1.75917e-05	5.37675	up		Seita.2G368800	7.83499e-09	1.61343	up		Seita.2G251900	7.1161e-06	1.66424	up							Seita.3G010200	0.001081	1.01653	up		Seita.2G069100	1.73134e-69	-5.33152	down
Seita.2G404100	0.00196104	-1.67535	down		Seita.4G085900	0.0123076	3.23652	up		Seita.3G164700	4.37966e-07	2.12957	up		Seita.2G115900	0.0469851	-1.125	down		Seita.5G332300	0.000673131	-2.06527	down		Seita.2G369900	0.0159584	-1.04482	down		Seita.2G252800	0.0222823	1.1115	up							Seita.3G011800	9.0662e-06	-1.16905	down		Seita.2G069900	1.97129e-06	-2.58167	down
Seita.2G404500	0.00855379	2.22179	up		Seita.4G086400	0.0291146	2.65442	up		Seita.3G165100	3.78252e-13	2.97749	up		Seita.2G117900	0.000238706	-2.07996	down		Seita.5G333000	0.000528606	2.34875	up		Seita.2G371400	0.0381293	-1.16886	down		Seita.2G252900	0.000225256	1.0607	up							Seita.3G011900	0.000913707	-1.4527	down		Seita.2G070000	7.40776e-05	-2.34418	down
Seita.2G405200	0.0002157	-2.78783	down		Seita.4G087700	0.00978203	-2.94319	down		Seita.3G166700	0.0211944	-1.21486	down		Seita.2G119700	0.0133639	1.41292	up		Seita.5G333100	0.0218646	2.16762	up		Seita.2G371600	0.00639848	-3.6642	down		Seita.2G255600	8.09317e-06	1.05122	up							Seita.3G014700	2.94393e-18	-5.25616	down		Seita.2G070400	0.0169508	-1.29505	down
Seita.2G405400	4.16175e-09	-5.03329	down		Seita.4G088600	0.0100874	-3.02076	down		Seita.3G166800	0.0289582	-1.07867	down		Seita.2G122700	0.00275445	-1.67917	down		Seita.5G337600	0.00785641	-3.80414	down		Seita.2G372100	0.00463347	-1.39028	down		Seita.2G255700	0.0279608	-1.12406	down							Seita.3G014900	0.0189978	1.23822	up		Seita.2G071100	1.00223e-11	-2.09164	down
Seita.2G406500	0.00603896	2.92571	up		Seita.4G090500	0.000151608	7.76589	up		Seita.3G167600	5.06955e-06	-3.4342	down		Seita.2G125300	5.03191e-10	1.53835	up		Seita.5G341700	1.89625e-05	2.54128	up		Seita.2G372500	2.42062e-09	-3.53063	down		Seita.2G256100	0.00121964	-1.17821	down							Seita.3G016700	3.70827e-11	-1.6048	down		Seita.2G072100	9.57906e-07	-2.35466	down
Seita.2G406600	0.00100504	-4.38771	down		Seita.4G092200	0.0407896	-1.58078	down		Seita.3G168400	0.000133822	-4.45658	down		Seita.2G126200	9.79792e-08	-2.54891	down		Seita.5G344700	0.00105483	-3.39567	down		Seita.2G373600	5.64967e-05	1.64143	up		Seita.2G256200	0.00246316	-1.23571	down							Seita.3G020400	1.13273e-35	-3.11348	down		Seita.2G072400	0.000439494	1.5516	up
Seita.2G407100	0.00363619	-1.53445	down		Seita.4G093700	0.0354952	2.24938	up		Seita.3G169000	0.000414132	-1.50495	down		Seita.2G127900	4.96549e-06	1.27564	up		Seita.5G346500	0.000829667	3.17627	up		Seita.2G373900	0.00522144	-1.13918	down		Seita.2G256300	7.41932e-10	-1.59627	down							Seita.3G022800	5.47371e-09	-1.46524	down		Seita.2G074900	0.00341263	-1.73356	down
Seita.2G407200	0.0019306	-2.38147	down		Seita.4G096200	0.0230935	1.88304	up		Seita.3G173700	0.00578979	-1.81681	down		Seita.2G128800	7.78391e-05	-1.06668	down		Seita.5G348000	0.0163908	1.57009	up		Seita.2G374300	3.57267e-24	-3.14002	down		Seita.2G256400	7.41119e-09	-3.01228	down							Seita.3G026900	1.42501e-05	-4.62299	down		Seita.2G075300	0.00797756	-1.60022	down
Seita.2G407300	8.1096e-09	-3.84636	down		Seita.4G098700	0.00203528	-2.97263	down		Seita.3G174700	1.1437e-05	-1.80933	down		Seita.2G129300	0.000362332	1.89821	up		Seita.5G348800	0.0494878	-2.87498	down		Seita.2G374400	4.29713e-15	-2.13827	down		Seita.2G256700	5.70642e-19	-2.93745	down							Seita.3G028500	0.0449018	-1.89515	down		Seita.2G075700	3.40368e-06	1.25508	up
Seita.2G407600	0.00467612	-2.09147	down		Seita.4G099600	4.41803e-08	-5.61886	down		Seita.3G174800	6.22745e-05	-3.17618	down		Seita.2G129700	0.0192244	1.27073	up		Seita.5G352100	5.28152e-05	3.74829	up		Seita.2G374700	0.00121606	-1.27038	down		Seita.2G256800	1.89439e-08	-2.96531	down							Seita.3G029000	4.50637e-05	-1.34231	down		Seita.2G077200	9.87944e-09	-3.77729	down
Seita.2G410100	1.16284e-06	3.37262	up		Seita.4G101600	3.17334e-07	6.24716	up		Seita.3G174900	2.41765e-05	-2.90931	down		Seita.2G130600	1.65083e-23	2.27223	up		Seita.5G355000	0.0205602	Inf	up		Seita.2G375300	0.0264037	2.96202	up		Seita.2G257000	0.00336739	2.44548	up							Seita.3G029400	1.96079e-05	-1.08233	down		Seita.2G077400	0.000221582	1.01718	up
Seita.2G410300	0.0497892	-1.43852	down		Seita.4G102100	0.000259253	-2.91764	down		Seita.3G175200	0.000673282	-1.45788	down		Seita.2G130700	1.53025e-92	-8.99088	down		Seita.5G360700	2.43387e-05	2.38597	up		Seita.2G375500	2.70704e-07	-2.93644	down		Seita.2G257800	0.00767172	-1.33471	down							Seita.3G031300	7.10744e-10	1.67699	up		Seita.2G077500	0.0176049	1.33175	up
Seita.2G410600	1.46922e-06	-3.39407	down		Seita.4G102700	0.0137561	-4.89544	down		Seita.3G175700	0.00877952	1.13284	up		Seita.2G131500	3.26921e-05	1.04011	up		Seita.5G360800	0.0106848	-2.01618	down		Seita.2G375900	3.55631e-07	2.34422	up		Seita.2G258900	6.46193e-07	2.60117	up							Seita.3G031400	8.04027e-05	-1.06784	down		Seita.2G077600	0.00274406	2.30498	up
Seita.2G412200	1.32615e-10	-4.38581	down		Seita.4G105400	0.0469802	-1.79143	down		Seita.3G176900	0.0128054	-1.31132	down		Seita.2G132100	0.00577474	-1.25936	down		Seita.5G361900	0.024482	2.09124	up		Seita.2G376600	0.0149562	-1.38103	down		Seita.2G260500	4.75546e-12	-1.53899	down							Seita.3G035500	2.37246e-07	1.40641	up		Seita.2G078400	2.9409e-08	-3.44925	down
Seita.2G414100	0.0078491	3.38133	up		Seita.4G108300	0.000588009	2.50614	up		Seita.3G177600	6.56623e-08	-2.93951	down		Seita.2G132500	2.36833e-09	1.20397	up		Seita.5G363100	3.23312e-08	-7.05428	down		Seita.2G377800	4.9917e-08	1.34977	up		Seita.2G260700	2.13982e-18	-3.92976	down							Seita.3G037000	1.48493e-05	-1.45931	down		Seita.2G079600	2.3122e-05	1.37403	up
Seita.2G414200	6.60176e-05	-5.4111	down		Seita.4G108700	0.0186585	-3.4076	down		Seita.3G178400	0.0280505	1.56865	up		Seita.2G132800	4.35771e-23	-3.98954	down		Seita.5G363400	0.00703176	-1.93515	down		Seita.2G379000	2.56496e-05	-3.03038	down		Seita.2G260900	4.17751e-06	-2.60117	down							Seita.3G037800	1.12289e-06	-1.23263	down		Seita.2G080200	3.19228e-20	7.26343	up
Seita.2G418400	0.014354	-2.42817	down		Seita.4G111500	0.0245697	-3.20131	down		Seita.3G179600	2.42902e-12	-2.78846	down		Seita.2G133200	0.00022187	-1.95714	down		Seita.5G367100	0.0446651	-1.57731	down		Seita.2G380300	1.65586e-05	-1.43961	down		Seita.2G263300	3.43197e-17	-2.03298	down							Seita.3G040300	0.01678	-1.12818	down		Seita.2G081000	1.00146e-25	5.42163	up
Seita.2G418500	0.00489985	-1.62176	down		Seita.4G112500	0.0188797	-4.61449	down		Seita.3G179700	0.000445029	-2.86741	down		Seita.2G133900	6.03604e-31	-5.27542	down		Seita.5G367700	0.000282941	2.0693	up		Seita.2G380800	1.75733e-08	-1.27536	down		Seita.2G264300	1.03939e-09	-1.49487	down							Seita.3G042300	7.32986e-05	-1.0255	down		Seita.2G082600	2.51524e-23	-4.07382	down
Seita.2G420900	0.0232325	1.1314	up		Seita.4G114000	0.0026178	-3.72247	down		Seita.3G180800	6.06051e-08	-3.24002	down		Seita.2G134000	1.25449e-11	-5.59773	down		Seita.5G367800	0.0335612	1.85843	up		Seita.2G381500	3.34024e-20	Inf	up		Seita.2G265900	7.64868e-06	-1.04021	down							Seita.3G043500	0.0390034	1.47476	up		Seita.2G082700	1.1887e-27	-Inf	down
Seita.2G422300	0.00018769	-2.4243	down		Seita.4G114100	0.0177726	-2.46521	down		Seita.3G184100	0.0366214	-1.95803	down		Seita.2G135400	7.77543e-13	-2.15113	down		Seita.5G368500	0.000185842	4.12555	up		Seita.2G381600	1.0133e-26	2.18842	up		Seita.2G267500	5.63967e-09	1.78507	up							Seita.3G045100	1.86771e-06	2.83239	up		Seita.2G086200	0.0191529	-1.14384	down
Seita.2G422400	0.0191362	-2.72331	down		Seita.4G119100	0.0170682	-2.67591	down		Seita.3G184400	3.50386e-12	-4.6266	down		Seita.2G137100	0.00955643	-1.56838	down		Seita.5G370200	0.00364394	-2.0034	down		Seita.2G381700	7.1626e-09	2.02407	up		Seita.2G267600	0.0117128	1.4233	up							Seita.3G045500	0.00230887	1.1138	up		Seita.2G086600	1.55175e-06	-1.30312	down
Seita.2G422600	0.000717568	-2.42791	down		Seita.4G119800	0.000260531	3.17569	up		Seita.3G184900	3.41286e-07	-2.07856	down		Seita.2G137400	1.80509e-12	-1.40898	down		Seita.5G370600	0.0162894	-4.09862	down		Seita.2G382100	1.05663e-10	1.33214	up		Seita.2G268500	3.54806e-06	-1.2968	down							Seita.3G047300	0.00455478	-1.01927	down		Seita.2G087100	1.13665e-09	-3.69908	down
Seita.2G422800	0.00207606	1.44735	up		Seita.4G120300	0.0155442	-2.40279	down		Seita.3G185800	0.024161	-1.10586	down		Seita.2G138400	0.000101747	-1.01585	down		Seita.5G374200	0.0334856	2.34405	up		Seita.2G382600	1.62854e-09	4.78067	up		Seita.2G269000	6.86699e-12	-1.97449	down							Seita.3G047800	2.21631e-06	-1.25344	down		Seita.2G088600	0.00643493	1.0494	up
Seita.2G423200	7.62852e-05	-4.30338	down		Seita.4G121400	5.65397e-06	-5.90995	down		Seita.3G187900	0.0180658	-1.0568	down		Seita.2G138600	0.0162684	1.33658	up		Seita.5G376100	6.01372e-06	3.15969	up		Seita.2G384800	1.44353e-05	-1.04339	down		Seita.2G269700	7.55077e-08	-1.31246	down							Seita.3G049600	0.0388824	1.09266	up		Seita.2G090100	0.00841023	-1.79987	down
Seita.2G424400	1.85308e-05	-4.42906	down		Seita.4G122000	0.0339402	3.17218	up		Seita.3G189400	0.00173108	-2.7886	down		Seita.2G139500	6.17039e-35	-2.8393	down		Seita.5G378700	4.62082e-05	2.84238	up		Seita.2G385300	3.77915e-09	-1.76394	down		Seita.2G269800	1.63016e-28	-2.98737	down							Seita.3G050700	0.000755027	1.25189	up		Seita.2G090300	6.78037e-09	-1.63383	down
Seita.2G424600	0.014886	-2.10079	down		Seita.4G122200	0.00962754	-1.97968	down		Seita.3G190500	4.69488e-05	Inf	up		Seita.2G141500	2.35361e-112	5.31076	up		Seita.5G379500	4.78608e-05	-2.25983	down		Seita.2G386800	7.38402e-05	-1.56685	down		Seita.2G269900	4.58512e-08	-2.59987	down							Seita.3G052400	0.00791307	-2.50285	down		Seita.2G090400	1.47236e-13	-5.70309	down
Seita.2G425800	2.22213e-06	-4.525	down		Seita.4G125900	0.0140215	-2.28614	down		Seita.3G193800	2.52431e-05	1.72059	up		Seita.2G141900	0.00288452	-1.52457	down		Seita.5G383100	0.0013895	2.92976	up		Seita.2G387300	0.000105582	-1.8542	down		Seita.2G270000	1.93058e-06	-1.55287	down							Seita.3G053800	0.00010956	1.12387	up		Seita.2G090500	3.71838e-10	3.85018	up
Seita.2G426000	0.0427798	1.54831	up		Seita.4G127100	0.0350266	-2.02918	down		Seita.3G198800	0.0015251	1.29593	up		Seita.2G144400	4.67097e-25	-4.61765	down		Seita.5G384700	0.000171966	2.00467	up		Seita.2G388200	7.48091e-20	-2.50422	down		Seita.2G271000	2.01695e-05	-1.32675	down							Seita.3G053900	0.0134727	-1.23085	down		Seita.2G092300	9.90196e-19	2.4299	up
Seita.2G429200	1.12183e-05	-2.2703	down		Seita.4G128800	0.0368542	-1.96994	down		Seita.3G201100	9.60704e-06	-3.24813	down		Seita.2G144900	1.53682e-17	-5.7518	down		Seita.5G384800	0.0288865	-4.97586	down		Seita.2G389800	0.0264767	1.20615	up		Seita.2G271100	3.11685e-06	-1.70876	down							Seita.3G054100	5.98771e-08	-1.3661	down		Seita.2G093400	0.00614578	-1.61385	down
Seita.2G429600	0.0334352	1.2847	up		Seita.4G132600	6.16425e-12	-5.3974	down		Seita.3G204700	7.60944e-06	2.07963	up		Seita.2G145700	1.1699e-24	-4.88171	down		Seita.5G385800	0.048675	-2.32056	down		Seita.2G390100	0.000909072	-1.86296	down		Seita.2G272000	0.00331288	1.54514	up							Seita.3G054600	0.00387601	-1.69469	down		Seita.2G093600	0.00075149	-2.06419	down
Seita.2G430900	0.00103886	-5.86387	down		Seita.4G134500	0.0173224	1.80889	up		Seita.3G206300	0.00121117	-1.72899	down		Seita.2G145800	4.18769e-39	-4.14803	down		Seita.5G389300	0.00291819	-3.59609	down		Seita.2G391600	0.000365801	-1.07436	down		Seita.2G273900	6.20456e-07	-1.63487	down							Seita.3G055400	5.59441e-09	2.50673	up		Seita.2G094000	0.0215897	1.11967	up
Seita.2G431200	2.02532e-06	-10.2656	down		Seita.4G138500	0.000208167	7.31547	up		Seita.3G206500	4.84056e-14	5.55066	up		Seita.2G145900	1.04006e-15	-3.83261	down		Seita.5G393800	0.000439329	2.60791	up		Seita.2G392100	4.02077e-06	1.06523	up		Seita.2G275600	1.47708e-10	2.64012	up							Seita.3G056000	0.0302066	-1.43041	down		Seita.2G095400	9.86217e-08	3.13818	up
Seita.2G431500	0.0236746	-7.60085	down		Seita.4G140300	0.000148131	6.94132	up		Seita.3G207800	8.0826e-05	4.08403	up		Seita.2G148000	0.00786416	1.16005	up		Seita.5G394300	1.08874e-09	3.24041	up		Seita.2G392200	5.39105e-07	-1.03446	down		Seita.2G276300	1.27276e-06	-1.53688	down							Seita.3G056400	3.11187e-08	-1.35861	down		Seita.2G095700	0.000655021	-2.02446	down
Seita.2G431600	7.96823e-11	-4.56208	down		Seita.4G141400	0.0069913	1.86218	up		Seita.3G209600	0.000210488	-2.28685	down		Seita.2G149000	0.00654068	1.04426	up		Seita.5G395300	6.86141e-05	2.16523	up		Seita.2G392300	3.73012e-06	-1.41062	down		Seita.2G276400	2.49497e-11	-2.43736	down							Seita.3G057100	3.06959e-05	1.19555	up		Seita.2G096800	7.9594e-11	-3.9552	down
Seita.2G433600	5.3008e-07	-2.24103	down		Seita.4G141700	0.0055912	-3.03214	down		Seita.3G209800	4.02593e-05	3.1564	up		Seita.2G149300	1.10847e-05	1.10991	up		Seita.5G396600	0.00667694	-2.62871	down		Seita.2G392400	1.10416e-08	-1.62669	down		Seita.2G276800	0.000577336	-1.50681	down							Seita.3G057200	0.00504759	-1.01813	down		Seita.2G097000	0.015804	1.12936	up
Seita.2G434100	1.77202e-05	-3.65147	down		Seita.4G143700	2.80868e-05	4.84263	up		Seita.3G212000	0.000164047	1.93897	up		Seita.2G151100	2.05837e-60	-3.84685	down		Seita.5G396700	0.0275982	-2.39845	down		Seita.2G394800	4.35429e-13	1.47639	up		Seita.2G277100	2.00499e-22	-5.0307	down							Seita.3G057300	0.00067496	-2.33941	down		Seita.2G098000	0.00436488	-1.72171	down
Seita.2G435200	0.00665703	-3.91314	down		Seita.4G147000	0.0307368	1.74089	up		Seita.3G215000	3.45438e-16	-3.5675	down		Seita.2G151800	1.81631e-09	1.22342	up		Seita.5G400700	0.0130465	-3.4885	down		Seita.2G395000	6.13025e-14	1.97882	up		Seita.2G277900	6.21473e-10	-1.36547	down							Seita.3G057800	6.15035e-05	-1.64657	down		Seita.2G098500	1.00817e-13	-1.96549	down
Seita.2G436000	0.00196484	-2.19662	down		Seita.4G150700	0.00124706	-2.85631	down		Seita.3G215600	5.63284e-08	2.73529	up		Seita.2G152800	2.70926e-15	-1.65689	down		Seita.5G400800	0.00824488	-1.95337	down		Seita.2G395600	2.43512e-06	1.00518	up		Seita.2G279800	0.000549032	-1.64186	down							Seita.3G059500	0.0126554	-1.44349	down		Seita.2G099400	0.00211635	-1.25955	down
Seita.2G436300	0.0176882	1.35731	up		Seita.4G155100	0.0170477	-2.95587	down		Seita.3G216900	0.00525819	-1.21061	down		Seita.2G154700	1.39529e-12	-1.50068	down		Seita.5G400900	0.000975027	-3.94436	down		Seita.2G396300	1.29603e-10	1.46835	up		Seita.2G280300	0.0197123	-2.34817	down							Seita.3G063200	5.74408e-09	-1.49163	down		Seita.2G100300	3.69015e-16	-2.18271	down
Seita.2G436400	4.95312e-07	-2.32881	down		Seita.4G159500	2.63505e-13	6.30818	up		Seita.3G217800	1.28799e-15	3.51515	up		Seita.2G155300	0.00791951	-1.1625	down		Seita.5G403300	5.92311e-07	-2.86936	down		Seita.2G397700	0.0409711	1.15036	up		Seita.2G282300	0.000858573	-1.50314	down							Seita.3G063300	0.0107246	-1.05402	down		Seita.2G100600	5.51447e-05	1.17592	up
Seita.2G436700	0.00353445	-1.64172	down		Seita.4G160400	0.0173362	1.96841	up		Seita.3G218800	7.84998e-05	1.68128	up		Seita.2G156100	4.61064e-07	-2.8399	down		Seita.5G404900	6.76669e-10	-3.31821	down		Seita.2G398500	3.60386e-07	-1.58501	down		Seita.2G283000	9.43741e-05	2.45644	up							Seita.3G064100	0.00503991	-1.00614	down		Seita.2G101800	0.000655645	2.15941	up
Seita.2G437900	1.27227e-14	3.94652	up		Seita.4G161100	0.0243347	-1.99127	down		Seita.3G218900	4.13507e-10	3.97937	up		Seita.2G156200	1.15647e-08	-1.23249	down		Seita.5G405700	0.0230051	-2.66794	down		Seita.2G399400	2.74867e-07	1.08895	up		Seita.2G283800	7.66526e-09	-1.70153	down							Seita.3G064600	0.0164242	-1.13294	down		Seita.2G102600	0.000134719	-1.04659	down
Seita.2G438400	0.00535908	-1.48379	down		Seita.4G161300	0.0486596	2.39289	up		Seita.3G220500	0.00227665	1.27525	up		Seita.2G156300	9.95664e-28	6.3929	up		Seita.5G405800	0.0490164	-1.2525	down		Seita.2G401100	0.00237315	-1.63833	down		Seita.2G284000	5.95844e-08	1.2262	up							Seita.3G065500	0.00208568	-1.11967	down		Seita.2G102800	1.46161e-15	-2.50046	down
Seita.2G441300	8.71935e-07	-3.47136	down		Seita.4G164300	0.000254623	4.56131	up		Seita.3G221100	0.000213023	-3.33721	down		Seita.2G157400	0.00131306	-2.5474	down		Seita.5G407700	0.0390802	-1.56202	down		Seita.2G401200	7.0979e-10	-1.32977	down		Seita.2G285400	0.00324746	-1.03754	down							Seita.3G066500	4.29776e-08	-1.40405	down		Seita.2G102900	1.32129e-06	-3.00997	down
Seita.2G441700	0.0112137	-1.52818	down		Seita.4G164400	0.00776246	-1.95339	down		Seita.3G221400	0.00225289	-1.30285	down		Seita.2G159000	5.97466e-21	1.93578	up		Seita.5G413400	0.0445001	1.23666	up		Seita.2G401700	4.09307e-06	-1.09734	down		Seita.2G286900	8.67343e-07	-1.45314	down							Seita.3G066700	8.46594e-19	-3.271	down		Seita.2G103600	1.42455e-16	-2.35356	down
Seita.2G442900	0.0040169	1.38552	up		Seita.4G166500	0.0208853	-2.81707	down		Seita.3G222200	3.83973e-07	-2.56495	down		Seita.2G159400	8.70759e-51	-5.86342	down		Seita.5G417800	0.000628008	2.1336	up		Seita.2G402500	7.63478e-12	-1.40512	down		Seita.2G287100	5.10816e-05	-1.44397	down							Seita.3G068600	0.00147662	-1.68038	down		Seita.2G104700	0.00191196	-1.80537	down
Seita.2G444300	0.0268245	1.14374	up		Seita.4G169900	0.0236301	1.7619	up		Seita.3G223500	0.0139704	-1.4158	down		Seita.2G159500	0.0376679	-1.22666	down		Seita.5G418400	0.0104102	-4.25205	down		Seita.2G402800	7.45135e-53	3.82377	up		Seita.2G288600	0.0137333	-1.23315	down							Seita.3G068800	5.19761e-21	-3.76708	down		Seita.2G104900	5.377e-06	2.66421	up
Seita.2G444500	0.000388228	-1.85607	down		Seita.4G173200	0.0196032	2.02188	up		Seita.3G223900	0.0149398	1.45004	up		Seita.2G159600	8.40631e-32	8.03041	up		Seita.5G421200	0.0342725	1.29489	up		Seita.2G404500	0.000986891	1.03218	up		Seita.2G289200	2.32049e-06	-1.31803	down							Seita.3G068900	6.59204e-12	-3.08697	down		Seita.2G105000	0.0334695	1.13806	up
Seita.3G002200	0.000637599	2.51597	up		Seita.4G173400	0.0371748	-2.92467	down		Seita.3G224400	0.0404739	-1.01234	down		Seita.2G159900	0.00674068	1.34494	up		Seita.5G422700	0.00327586	-2.63038	down		Seita.2G410200	3.77418e-09	1.21947	up		Seita.2G290300	0.000145973	1.04675	up							Seita.3G070200	2.92872e-06	2.12817	up		Seita.2G105100	0.000410059	2.0418	up
Seita.3G003000	0.00952162	-1.8776	down		Seita.4G175000	0.00784439	-2.80641	down		Seita.3G224500	2.9823e-17	-3.36668	down		Seita.2G160700	4.68087e-11	6.08901	up		Seita.5G422900	2.37665e-05	3.58881	up		Seita.2G410600	1.04784e-06	-1.51127	down		Seita.2G290900	1.56255e-06	-1.10678	down							Seita.3G072700	2.90421e-23	-Inf	down		Seita.2G106200	1.3756e-10	-1.84153	down
Seita.3G003200	0.0370806	-1.10143	down		Seita.4G176400	0.0436488	-1.62273	down		Seita.3G224900	0.000150569	2.07455	up		Seita.2G164500	2.48554e-13	1.52723	up		Seita.5G423000	0.0122983	1.5274	up		Seita.2G412400	9.94319e-07	2.73487	up		Seita.2G291600	9.47936e-07	-2.12877	down							Seita.3G073100	4.87263e-05	-1.28997	down		Seita.2G106300	0.000516011	-1.73394	down
Seita.3G003900	0.0465696	-1.63829	down		Seita.4G176800	2.2768e-06	-3.609	down		Seita.3G225200	0.00698331	-1.66807	down		Seita.2G165100	0.000413472	1.29648	up		Seita.5G423200	9.61281e-16	-4.30185	down		Seita.2G415300	0.0293735	-3.05696	down		Seita.2G292900	3.10423e-09	-1.97508	down							Seita.3G073300	0.00504932	-1.47686	down		Seita.2G106500	5.3503e-24	-5.14316	down
Seita.3G004500	0.00171273	-1.48402	down		Seita.4G178900	0.0418045	-3.16257	down		Seita.3G225500	9.9615e-09	4.51439	up		Seita.2G165500	1.6513e-06	-1.04096	down		Seita.5G426500	0.0294967	-1.51106	down		Seita.2G416600	9.64739e-06	-1.11552	down		Seita.2G293100	1.80089e-05	-1.04601	down							Seita.3G073900	5.16752e-07	-1.31748	down		Seita.2G107900	2.57701e-08	1.77358	up
Seita.3G004800	0.00052157	-10.7248	down		Seita.4G179600	0.0236338	-3.55294	down		Seita.3G225700	6.0591e-05	-2.11025	down		Seita.2G165600	3.03363e-06	-1.06135	down		Seita.5G427700	0.0114765	-2.19395	down		Seita.2G417100	0.000210936	1.50171	up		Seita.2G293600	5.16403e-33	-2.69277	down							Seita.3G074300	3.36536e-06	-1.56113	down		Seita.2G108500	5.12354e-05	-1.09651	down
Seita.3G005500	0.00286344	2.22382	up		Seita.4G180900	0.0318036	-2.57862	down		Seita.3G227300	0.0351698	1.10214	up		Seita.2G166600	4.67682e-10	-2.19104	down		Seita.5G428600	0.0429683	3.56223	up		Seita.2G418200	2.8833e-19	1.82657	up		Seita.2G293700	5.54268e-19	-2.02422	down							Seita.3G074700	0.00260663	2.23352	up		Seita.2G108800	2.72343e-06	2.87931	up
Seita.3G006100	0.003102	-2.12573	down		Seita.4G181300	0.0301584	2.44373	up		Seita.3G229000	2.12809e-18	-6.18012	down		Seita.2G166700	0.0246664	1.00656	up		Seita.5G433700	1.87082e-08	-4.64677	down		Seita.2G418300	2.51843e-07	3.06342	up		Seita.2G297100	0.00663478	-1.40133	down							Seita.3G075400	0.00060764	-1.72341	down		Seita.2G108900	1.09755e-07	-1.62165	down
Seita.3G006200	2.22111e-06	-2.46072	down		Seita.4G181400	0.0188938	-1.78341	down		Seita.3G232700	0.0278766	-1.13309	down		Seita.2G168000	7.4344e-12	3.04982	up		Seita.5G442500	0.0410908	2.57713	up		Seita.2G418500	1.66423e-07	-2.32591	down		Seita.2G298400	9.84577e-08	-1.3604	down							Seita.3G076800	0.0262021	-1.30899	down		Seita.2G109300	1.62336e-07	-2.44275	down
Seita.3G007100	1.76977e-10	-4.8877	down		Seita.4G181500	0.0301921	-1.54779	down		Seita.3G233500	6.80195e-05	-1.73989	down		Seita.2G168200	3.94285e-06	-1.85593	down		Seita.5G443400	0.0289244	-1.73314	down		Seita.2G420000	0.0174188	1.39226	up		Seita.2G299400	0.00061133	-1.4593	down							Seita.3G077100	1.58735e-17	2.20668	up		Seita.2G110300	8.42351e-08	-2.21981	down
Seita.3G009100	0.00493323	-1.68586	down		Seita.4G182100	0.00254479	-4.07828	down		Seita.3G236600	1.33404e-13	-5.7567	down		Seita.2G169100	0.00494875	-1.47559	down		Seita.5G446300	0.00639619	-6.55618	down		Seita.2G422000	6.21655e-11	-1.34278	down		Seita.2G299900	1.55222e-08	-1.74453	down							Seita.3G078100	0.0143196	1.34943	up		Seita.2G110700	0.000140886	-2.22442	down
Seita.3G010800	1.87244e-10	-4.31571	down		Seita.4G185100	0.00141299	-3.10389	down		Seita.3G238400	0.0120232	-1.1758	down		Seita.2G169700	1.33783e-31	2.43104	up		Seita.5G447800	0.0436898	-1.65188	down		Seita.2G422300	2.29311e-08	-2.77761	down		Seita.2G300000	1.05383e-10	-2.17339	down							Seita.3G078700	1.13272e-07	2.00849	up		Seita.2G112100	4.17782e-09	-2.61934	down
Seita.3G013100	5.54519e-07	-2.5064	down		Seita.4G186000	0.0280816	-2.08896	down		Seita.3G238700	0.000690741	-1.58518	down		Seita.2G170600	1.10569e-05	-1.188	down		Seita.5G449200	0.018051	-2.77963	down		Seita.2G422400	4.41372e-05	-3.73294	down		Seita.2G300500	0.0168765	1.02626	up							Seita.3G079000	2.14546e-18	-3.8414	down		Seita.2G112200	1.88958e-05	-1.95084	down
Seita.3G014000	7.57384e-06	3.13528	up		Seita.4G187300	1.77937e-05	-3.31745	down		Seita.3G239400	1.11962e-06	-2.11547	down		Seita.2G172500	0.00447089	1.24157	up		Seita.5G451100	0.0433266	-1.39988	down		Seita.2G422600	0.0110564	-1.21238	down		Seita.2G300600	0.0321807	-1.09434	down							Seita.3G082100	1.50619e-05	-2.53923	down		Seita.2G113100	1.36764e-15	-3.33786	down
Seita.3G014900	0.0074422	-1.33197	down		Seita.4G187600	0.019006	-1.79984	down		Seita.3G241100	0.049506	1.62452	up		Seita.2G172800	0.0184134	-1.56301	down		Seita.5G454300	0.00017884	3.55791	up		Seita.2G423300	4.86777e-17	-1.94817	down		Seita.2G300900	1.77295e-12	-2.42678	down							Seita.3G084000	6.22686e-07	2.02724	up		Seita.2G114600	0.000261874	-1.01533	down
Seita.3G016400	0.00133442	-1.48583	down		Seita.4G191500	0.000623421	-2.67943	down		Seita.3G243700	0.000157143	5.52025	up		Seita.2G174500	2.97734e-11	-2.81298	down		Seita.5G455300	0.017958	-1.5736	down		Seita.2G426500	0.01457	-1.64501	down		Seita.2G302400	0.0105598	-1.16682	down							Seita.3G085200	0.042605	1.15489	up		Seita.2G114900	0.000167137	-1.02329	down
Seita.3G017100	8.42295e-12	3.33533	up		Seita.4G193700	0.0118461	2.37057	up		Seita.3G248300	0.0188381	-1.05462	down		Seita.2G175100	0.0218952	-1.32813	down		Seita.5G455800	0.00442916	-1.89268	down		Seita.2G426600	9.76624e-05	-1.05998	down		Seita.2G303000	4.69857e-20	2.04455	up							Seita.3G085500	6.39798e-06	-1.17411	down		Seita.2G115100	7.34934e-29	5.02144	up
Seita.3G017300	0.000270593	-3.55966	down		Seita.4G195200	0.0164944	2.70757	up		Seita.3G248500	0.0277438	-1.00632	down		Seita.2G175800	2.86045e-24	-3.81093	down		Seita.5G461500	0.0441432	-1.36344	down		Seita.2G428500	0.0255882	1.09576	up		Seita.2G304400	8.40585e-22	2.23746	up							Seita.3G086600	6.95604e-07	-5.25217	down		Seita.2G115600	1.45498e-09	-3.90321	down
Seita.3G020300	0.0431193	1.03493	up		Seita.4G195600	0.00718139	3.34169	up		Seita.3G250400	0.0128896	-2.11224	down		Seita.2G176800	2.47881e-08	-1.20238	down		Seita.5G470300	0.031966	-3.01966	down		Seita.2G428900	0.000141631	-1.69166	down		Seita.2G304500	0.00377524	-1.26694	down							Seita.3G087100	2.37553e-20	2.44863	up		Seita.2G116100	0.000104712	-2.09428	down
Seita.3G021000	1.61864e-08	-3.94948	down		Seita.4G196000	5.21058e-05	7.51651	up		Seita.3G255700	0.000401726	-2.54029	down		Seita.2G177500	1.23048e-08	1.1649	up		Seita.5G470500	1.78372e-06	-2.50634	down		Seita.2G429200	0.00140295	-1.59911	down		Seita.2G304700	9.44024e-11	2.4831	up							Seita.3G091400	0.032625	-1.71359	down		Seita.2G118900	0.0102341	1.71812	up
Seita.3G021300	0.0139031	-1.21648	down		Seita.4G196400	0.0150976	-1.7575	down		Seita.3G256200	0.0151322	-1.991	down		Seita.2G178900	1.18553e-10	1.35184	up		Seita.6G001600	0.00401059	-1.71594	down		Seita.2G429400	1.92178e-06	1.01008	up		Seita.2G304800	0.000135792	-1.39001	down							Seita.3G093500	1.09545e-31	2.99683	up		Seita.2G119600	2.47244e-06	2.32085	up
Seita.3G021500	0.0147359	1.41126	up		Seita.4G197200	0.0141123	-2.22282	down		Seita.3G260500	0.0401246	-1.61591	down		Seita.2G179500	1.80475e-09	1.44195	up		Seita.6G005300	7.76164e-15	6.96226	up		Seita.2G429800	1.10473e-18	-2.959	down		Seita.2G306200	0.00933743	-1.22629	down							Seita.3G095700	5.74094e-05	1.03274	up		Seita.2G122700	9.58777e-06	-3.55559	down
Seita.3G021600	1.66583e-05	3.46161	up		Seita.4G197600	0.00973184	2.76881	up		Seita.3G260600	0.0475177	-1.59752	down		Seita.2G179600	1.62618e-13	-1.59892	down		Seita.6G005400	0.0104102	Inf	up		Seita.2G431000	2.09073e-10	-4.20939	down		Seita.2G307400	1.56846e-10	-3.89482	down							Seita.3G096700	0.00691155	-1.54736	down		Seita.2G123000	2.76385e-09	-1.88156	down
Seita.3G022600	0.000246656	-2.75701	down		Seita.4G202100	0.0474024	-2.65125	down		Seita.3G260800	0.00247914	-4.49531	down		Seita.2G179700	2.92591e-08	-1.14017	down		Seita.6G007700	7.53757e-05	-2.95277	down		Seita.2G431100	5.05715e-17	-4.38402	down		Seita.2G308000	8.06047e-24	-3.09997	down							Seita.3G096800	3.44442e-09	-1.56879	down		Seita.2G123200	4.85759e-14	-3.20155	down
Seita.3G023300	5.74969e-05	2.78781	up		Seita.4G204100	0.00417911	-2.04802	down		Seita.3G261300	0.00460778	-1.26084	down		Seita.2G179800	3.18431e-15	-1.58442	down		Seita.6G009300	7.50742e-05	-2.90746	down		Seita.2G431200	9.47054e-58	-6.4206	down		Seita.2G308200	0.000729424	1.65874	up							Seita.3G097400	2.74065e-24	-2.65253	down		Seita.2G123300	2.92691e-06	-3.8016	down
Seita.3G023800	8.03107e-06	-3.13524	down		Seita.4G204700	0.00553235	-2.35036	down		Seita.3G262000	0.0397035	-1.75072	down		Seita.2G180100	7.5809e-12	1.51652	up		Seita.6G011200	0.00892206	-1.90156	down		Seita.2G431300	3.12263e-10	-2.716	down		Seita.2G309200	5.24729e-07	1.50461	up							Seita.3G097900	0.000117159	-1.00479	down		Seita.2G124600	3.59743e-07	1.42862	up
Seita.3G025500	2.83479e-10	-3.68057	down		Seita.4G207100	0.0350048	-2.66858	down		Seita.3G263800	1.23832e-08	-4.23218	down		Seita.2G180300	1.65155e-06	1.09131	up		Seita.6G021900	0.00315832	1.72274	up		Seita.2G431400	2.40673e-20	-6.58974	down		Seita.2G310800	0.0322307	1.14152	up							Seita.3G098100	3.81204e-09	-1.43603	down		Seita.2G125300	0.00229111	1.0347	up
Seita.3G028200	0.0137138	-3.5776	down		Seita.4G207500	6.16059e-05	-2.73254	down		Seita.3G264300	4.66467e-09	3.52015	up		Seita.2G180500	0.000549577	1.46104	up		Seita.6G026000	0.00839396	-2.00618	down		Seita.2G431500	7.99484e-136	-6.57044	down		Seita.2G311500	0.00954219	-1.56802	down							Seita.3G098200	0.000146369	-1.03245	down		Seita.2G125700	0.00116258	1.94738	up
Seita.3G028500	6.8529e-12	-4.54452	down		Seita.4G210300	0.0415043	1.55081	up		Seita.3G265000	0.0310771	-1.28324	down		Seita.2G181200	5.01218e-05	-1.82398	down		Seita.6G028000	0.0400653	1.82955	up		Seita.2G432000	5.55762e-08	1.12881	up		Seita.2G312000	1.26712e-19	-3.64465	down							Seita.3G098900	0.0272707	-1.32594	down		Seita.2G126200	8.39672e-06	-2.30307	down
Seita.3G028600	0.000153145	-3.37577	down		Seita.4G215100	0.00672917	2.52718	up		Seita.3G268500	0.00545089	3.32993	up		Seita.2G182000	0.0468342	-1.07095	down		Seita.6G029400	0.0403007	-1.82086	down		Seita.2G432200	0.000240427	-1.96038	down		Seita.2G313100	0.000153519	-1.26107	down							Seita.3G099000	5.0343e-30	-2.97897	down		Seita.2G128600	0.0212553	-1.79708	down
Seita.3G029000	7.89268e-09	-2.78404	down		Seita.4G218900	0.00327929	-4.79647	down		Seita.3G269000	0.00465161	3.42435	up		Seita.2G182800	2.71247e-10	-1.61257	down		Seita.6G030000	0.0197742	-1.71745	down		Seita.2G433600	1.05238e-05	-1.87143	down		Seita.2G313200	6.60552e-10	-2.35772	down							Seita.3G099500	0.0122987	1.20162	up		Seita.2G130600	0.0116278	-1.92751	down
Seita.3G030400	0.0145542	1.24871	up		Seita.4G219000	0.0410455	2.53537	up		Seita.3G269600	0.00364067	-1.96306	down		Seita.2G183300	7.8583e-09	-2.46967	down		Seita.6G032700	0.0240114	-4.75918	down		Seita.2G434000	7.14187e-09	-2.49976	down		Seita.2G313800	2.16201e-08	-2.61703	down							Seita.3G102200	4.24384e-12	2.23009	up		Seita.2G132800	1.4222e-06	-1.73976	down
Seita.3G030500	7.39633e-06	-2.45406	down		Seita.4G219700	0.0264287	-2.19758	down		Seita.3G270200	0.0070016	-1.29737	down		Seita.2G186000	2.04839e-05	1.5594	up		Seita.6G045900	0.0289244	-1.85546	down		Seita.2G434300	1.62854e-09	-1.37285	down		Seita.2G315100	3.56439e-05	-1.48739	down							Seita.3G102500	0.00226058	-2.3065	down		Seita.2G133200	8.2918e-15	-2.44896	down
Seita.3G032200	0.012176	-1.69985	down		Seita.4G220100	0.010325	-2.87337	down		Seita.3G275400	4.04347e-06	3.61013	up		Seita.2G186900	0.0126798	-2.69748	down		Seita.6G049400	0.0222412	-2.28262	down		Seita.2G435100	0.000238124	-1.70349	down		Seita.2G315900	0.0333697	-1.36089	down							Seita.3G103200	5.65888e-09	-1.48595	down		Seita.2G133900	1.17137e-71	-5.44801	down
Seita.3G033600	6.72338e-08	2.82815	up		Seita.4G220500	0.0239727	2.63784	up		Seita.3G279400	7.97455e-08	-2.21983	down		Seita.2G187000	1.27584e-07	-1.97661	down		Seita.6G049700	0.0457464	-1.96689	down		Seita.2G435300	1.54009e-06	-1.29636	down		Seita.2G316000	8.38991e-06	-1.0416	down							Seita.3G104600	0.000310604	-1.36699	down		Seita.2G134000	2.52253e-64	-5.60476	down
Seita.3G034800	5.64569e-06	3.22111	up		Seita.4G222600	0.000542103	-2.58529	down		Seita.3G281700	0.000709167	1.52322	up		Seita.2G187200	6.79552e-09	1.26186	up		Seita.6G049800	0.00358289	-2.96755	down		Seita.2G436000	6.32949e-07	1.83747	up		Seita.2G317900	1.63753e-16	-3.03205	down							Seita.3G105100	0.0129236	1.29657	up		Seita.2G134800	0.000130112	-1.18482	down
Seita.3G034900	0.00649652	-3.42727	down		Seita.4G224300	0.00853801	-1.98141	down		Seita.3G281800	0.00137879	2.16427	up		Seita.2G187300	0.000474436	-5.17292	down		Seita.6G049900	0.00611408	1.74065	up		Seita.2G436100	0.000192241	1.12302	up		Seita.2G319800	7.05976e-18	2.39517	up							Seita.3G105500	4.17432e-12	-2.74216	down		Seita.2G135400	2.61063e-12	-2.66931	down
Seita.3G036400	0.0249458	4.18501	up		Seita.4G226600	0.0173156	-4.48962	down		Seita.3G283100	0.0152148	-2.52691	down		Seita.2G187400	6.07588e-27	-3.31484	down		Seita.6G050700	0.000828421	-1.87498	down		Seita.2G436200	4.70362e-06	-1.55016	down		Seita.2G320000	1.44615e-17	2.65872	up							Seita.3G106600	0.0182553	-1.23055	down		Seita.2G135600	2.90642e-05	-1.18364	down
Seita.3G037900	0.0317519	-3.78958	down		Seita.4G227700	0.00398732	-3.12298	down		Seita.3G286100	3.65989e-05	3.24556	up		Seita.2G187800	2.83756e-26	-4.72099	down		Seita.6G053400	0.00183298	-2.89979	down		Seita.2G436600	2.80739e-32	-2.53397	down		Seita.2G320200	0.0041527	-1.15697	down							Seita.3G108500	4.95427e-14	1.90032	up		Seita.2G136700	3.81743e-05	4.6543	up
Seita.3G038000	0.0187393	-4.10107	down		Seita.4G229600	0.0190206	-3.36071	down		Seita.3G287100	0.00234622	-1.45447	down		Seita.2G187900	1.7128e-12	-2.7392	down		Seita.6G055700	0.0299456	3.26641	up		Seita.2G436800	7.89716e-07	-1.09297	down		Seita.2G324100	1.17414e-20	-2.09681	down							Seita.3G108800	5.74884e-13	6.17729	up		Seita.2G137400	0.00453027	-1.05803	down
Seita.3G038400	0.0201576	-1.20215	down		Seita.4G231500	0.0360611	-2.19983	down		Seita.3G292400	0.0212146	1.8524	up		Seita.2G188200	8.51746e-38	-2.85191	down		Seita.6G056400	0.000394072	-2.03029	down		Seita.2G437500	8.07894e-17	2.00633	up		Seita.2G324500	0.00414424	-1.20463	down							Seita.3G108900	6.8864e-05	1.06122	up		Seita.2G137500	0.00255682	-1.29526	down
Seita.3G038600	0.0243581	-2.04142	down		Seita.4G232700	0.000414407	-4.10082	down		Seita.3G298100	3.08967e-08	4.43663	up		Seita.2G188300	0.00116264	3.16499	up		Seita.6G063500	0.0295757	1.97743	up		Seita.2G437900	1.3622e-109	Inf	up		Seita.2G324600	6.76862e-07	-2.53484	down							Seita.3G109200	0.0459633	-1.15622	down		Seita.2G138400	1.40522e-10	-1.76645	down
Seita.3G038700	0.00238494	-1.63254	down		Seita.4G233000	0.0386323	-2.49114	down		Seita.3G300100	0.0447107	-1.57685	down		Seita.2G188400	0.000102247	-1.64024	down		Seita.6G075700	0.0005694	-3.07796	down		Seita.2G438100	0.013775	1.47581	up		Seita.2G325700	5.98071e-09	-1.32207	down							Seita.3G109300	0.0367914	1.00218	up		Seita.2G138600	6.02759e-07	3.12466	up
Seita.3G042200	0.000277452	-2.09521	down		Seita.4G234100	0.0136168	-2.19324	down		Seita.3G308800	0.00210109	-1.97376	down		Seita.2G188800	4.11667e-09	-2.06629	down		Seita.6G083800	0.0300981	-2.59749	down		Seita.2G438500	1.08059e-59	4.57781	up		Seita.2G328200	4.46003e-07	-1.18025	down							Seita.3G111200	0.00181833	-2.81128	down		Seita.2G139500	0.000179258	-2.3973	down
Seita.3G043500	3.26998e-07	3.01323	up		Seita.4G236400	0.0078435	3.61801	up		Seita.3G311700	7.54749e-08	3.87882	up		Seita.2G189100	6.48552e-09	-2.93062	down		Seita.6G084700	0.00572864	-3.15216	down		Seita.2G441700	9.76832e-42	-2.81998	down		Seita.2G329200	0.0376497	-1.11833	down							Seita.3G111800	5.2226e-12	1.67961	up		Seita.2G140600	0.0035591	8.33673	up
Seita.3G044200	0.0199654	-1.13357	down		Seita.4G237700	0.0433996	-1.70605	down		Seita.3G312400	0.0456786	-1.36392	down		Seita.2G189200	0.000250331	-1.0162	down		Seita.6G088800	8.43336e-05	3.2915	up		Seita.2G442600	3.70375e-07	1.4456	up		Seita.2G330800	0.000189778	1.36239	up							Seita.3G113000	6.575e-05	-1.44461	down		Seita.2G141500	6.85065e-70	5.36023	up
Seita.3G048400	0.0477369	-1.23776	down		Seita.4G239300	3.58124e-06	-3.97756	down		Seita.3G315000	0.0167923	2.24473	up		Seita.2G189300	0.0188532	-1.47571	down		Seita.6G089500	0.000136093	-2.30776	down		Seita.2G442900	2.61429e-06	1.13425	up		Seita.2G331500	0.00191749	1.37278	up							Seita.3G114000	9.96204e-21	-2.93524	down		Seita.2G141900	6.47601e-08	-2.35724	down
Seita.3G049400	0.0437355	1.42218	up		Seita.4G239800	0.00151654	2.28177	up		Seita.3G320700	0.0475893	2.215	up		Seita.2G189400	0.000272046	-1.11892	down		Seita.6G090000	0.00398222	-1.98033	down		Seita.2G443900	1.25938e-05	1.64118	up		Seita.2G332000	6.86208e-20	2.14255	up							Seita.3G114700	3.58666e-07	-2.40878	down		Seita.2G143300	0.00019708	1.53658	up
Seita.3G049900	0.00144678	1.77183	up		Seita.4G240700	0.00685389	-1.98504	down		Seita.3G321700	0.00972082	-1.85859	down		Seita.2G190100	1.78256e-07	-2.48096	down		Seita.6G096700	0.0211148	-1.37954	down		Seita.2G444500	4.14556e-28	-2.31413	down		Seita.2G332300	0.012975	1.23352	up							Seita.3G115000	1.15183e-06	-1.27649	down		Seita.2G143600	0.0199798	1.31463	up
Seita.3G051000	6.29034e-05	-3.14353	down		Seita.4G245500	1.80629e-08	10.8642	up		Seita.3G324600	0.000175084	-1.77093	down		Seita.2G190400	1.00298e-08	-1.66574	down		Seita.6G098100	0.000481237	-3.12855	down		Seita.3G000700	1.76701e-16	-2.72045	down		Seita.2G332700	1.15686e-11	-1.97061	down							Seita.3G116400	0.0101088	1.14229	up		Seita.2G144400	1.09974e-20	-2.5405	down
Seita.3G051400	0.000695601	-1.6294	down		Seita.4G245700	0.000376414	-3.95553	down		Seita.3G327200	0.00434118	-5.14836	down		Seita.2G190900	0.00195392	1.17828	up		Seita.6G103800	0.0120825	-1.84826	down		Seita.3G002200	5.0694e-22	4.16841	up		Seita.2G333000	0.010872	-1.33861	down							Seita.3G119200	3.37689e-12	-1.71347	down		Seita.2G144900	3.2505e-16	-3.28923	down
Seita.3G052900	1.14362e-08	-3.77774	down		Seita.4G247100	0.0349705	-2.28965	down		Seita.3G327400	7.70951e-12	-2.73585	down		Seita.2G192400	7.27701e-17	-4.33936	down		Seita.6G105500	0.0149625	1.44015	up		Seita.3G002300	0.000231759	-2.44602	down		Seita.2G333400	0.0137725	-1.22921	down							Seita.3G120200	2.08657e-16	2.3212	up		Seita.2G145300	0.000384972	1.07659	up
Seita.3G053000	0.000341269	-4.53222	down		Seita.4G248700	0.000518104	-4.42024	down		Seita.3G328100	0.00740601	7.08661	up		Seita.2G192500	0.000790989	-1.59356	down		Seita.6G111600	0.040225	-2.40831	down		Seita.3G002900	0.00311133	-1.28863	down		Seita.2G335300	1.14916e-33	-2.9414	down							Seita.3G120400	3.57474e-06	-1.3914	down		Seita.2G145700	4.94782e-16	-2.16555	down
Seita.3G055000	0.0024802	-2.32858	down		Seita.4G252200	1.49557e-07	4.7649	up		Seita.3G328300	0.00782326	2.58099	up		Seita.2G193000	0.00279907	1.34157	up		Seita.6G118900	0.0103308	1.56645	up		Seita.3G003000	0.00529157	-1.59157	down		Seita.2G336100	3.29933e-06	-1.73383	down							Seita.3G121800	3.81666e-07	-1.31415	down		Seita.2G145800	4.22753e-20	-2.47351	down
Seita.3G056300	0.0496862	4.36919	up		Seita.4G254100	0.0386323	1.72232	up		Seita.3G330000	0.0271301	2.39749	up		Seita.2G193200	3.29082e-06	1.32473	up		Seita.6G120700	2.35999e-15	-7.04063	down		Seita.3G003400	0.00106459	1.95307	up		Seita.2G336200	1.00683e-09	-2.861	down							Seita.3G122800	1.19137e-05	-1.10858	down		Seita.2G145900	0.000281147	-1.61139	down
Seita.3G056400	0.018159	-3.38292	down		Seita.4G255100	0.00945245	2.11835	up		Seita.3G330400	0.00691423	2.09175	up		Seita.2G193900	2.5427e-18	1.79288	up		Seita.6G123500	0.00150682	6.78697	up		Seita.3G005200	2.29815e-05	-1.60347	down		Seita.2G336500	2.8249e-05	-1.07695	down							Seita.3G123300	1.05624e-06	-1.21388	down		Seita.2G149000	7.82718e-06	1.71846	up
Seita.3G057100	1.51698e-10	3.48673	up		Seita.4G258300	0.00988999	-3.37965	down		Seita.3G332200	5.43266e-08	-2.13682	down		Seita.2G194000	2.17102e-09	-2.01397	down		Seita.6G125400	6.93705e-05	-4.41878	down		Seita.3G005400	3.97943e-45	-2.93307	down		Seita.2G336700	0.000249523	-1.00479	down							Seita.3G123800	2.87063e-06	2.13269	up		Seita.2G149300	3.89992e-09	1.78509	up
Seita.3G057300	0.0157174	1.79492	up		Seita.4G258900	0.0102536	1.91067	up		Seita.3G333100	0.0416311	-1.13677	down		Seita.2G194200	1.0578e-05	-1.2763	down		Seita.6G130800	5.81155e-09	3.15623	up		Seita.3G005900	0.000800558	-1.00425	down		Seita.2G336900	0.00139459	1.77038	up							Seita.3G124200	0.00219008	-1.96763	down		Seita.2G150000	3.10554e-05	-1.15141	down
Seita.3G059500	0.0257112	-1.52938	down		Seita.4G259700	0.00475276	-2.36336	down		Seita.3G333600	0.0376257	2.42287	up		Seita.2G194500	0.00537493	-1.65538	down		Seita.6G131300	0.00415746	3.12511	up		Seita.3G006400	0.00684976	1.30015	up		Seita.2G339400	2.71026e-06	-2.2431	down							Seita.3G124300	4.63311e-06	-1.16381	down		Seita.2G150600	0.00208986	1.30459	up
Seita.3G063000	0.00970736	-1.63835	down		Seita.4G260000	0.0243292	-2.52775	down		Seita.3G337300	0.00875908	-2.11289	down		Seita.2G195200	1.89582e-13	-1.81856	down		Seita.6G131400	0.00719808	2.85522	up		Seita.3G007600	1.91716e-07	1.18227	up		Seita.2G339600	0.00295124	-1.03305	down							Seita.3G126100	0.0106191	-1.95552	down		Seita.2G151100	1.09833e-41	-4.01194	down
Seita.3G066200	2.31555e-11	-4.87498	down		Seita.4G260400	0.0256976	-3.02938	down		Seita.3G338400	0.000873651	-1.62719	down		Seita.2G195300	1.72215e-07	-1.09662	down		Seita.6G131500	0.00170331	2.69281	up		Seita.3G007800	3.79264e-09	1.20442	up		Seita.2G339800	4.83585e-26	-4.01088	down							Seita.3G128300	2.90819e-05	1.05317	up		Seita.2G151900	0.00164872	1.11203	up
Seita.3G066400	8.71935e-07	-4.97943	down		Seita.4G267900	0.00920602	1.93819	up		Seita.3G339100	0.000239774	-2.05869	down		Seita.2G196600	0.00910087	1.13134	up		Seita.6G131600	5.5773e-10	3.26222	up		Seita.3G008400	0.000987935	1.69765	up		Seita.2G340200	1.85972e-05	-2.27776	down							Seita.3G128500	4.12952e-17	-2.17365	down		Seita.2G154400	2.30018e-05	-1.1416	down
Seita.3G067600	9.52375e-09	-2.63777	down		Seita.4G268600	8.65193e-09	4.85152	up		Seita.3G340100	0.0330737	-6.22816	down		Seita.2G196700	5.81656e-12	1.70298	up		Seita.6G137600	4.361e-06	2.92019	up		Seita.3G008700	0.00134264	-1.0059	down		Seita.2G340400	5.41945e-06	-2.53776	down							Seita.3G128900	5.59578e-06	-3.04798	down		Seita.2G156100	2.85542e-07	-2.8554	down
Seita.3G068000	0.0172468	1.22503	up		Seita.4G270600	0.0388495	-1.70584	down		Seita.3G343100	1.92393e-07	-4.06423	down		Seita.2G197500	5.65858e-19	2.51439	up		Seita.6G139900	3.63039e-06	-4.30822	down		Seita.3G009900	3.62685e-09	-1.21402	down		Seita.2G340600	2.89618e-21	-2.19862	down							Seita.3G131100	0.0003277	2.13624	up		Seita.2G156200	0.00189557	-1.5055	down
Seita.3G070700	8.27919e-08	-2.54624	down		Seita.4G273400	0.00651792	-3.26835	down		Seita.3G343500	0.0017469	1.67469	up		Seita.2G198700	1.86685e-09	-2.03018	down		Seita.6G140600	0.00167389	-2.56399	down		Seita.3G010000	2.48437e-07	1.37403	up		Seita.2G341200	1.39105e-15	-3.38363	down							Seita.3G131700	0.00805945	1.24005	up		Seita.2G156300	3.03157e-07	3.71438	up
Seita.3G071400	0.0406115	-1.39401	down		Seita.4G276900	0.0373225	-3.25861	down		Seita.3G344200	0.00083202	-2.62178	down		Seita.2G198800	1.32108e-26	-3.15112	down		Seita.6G144500	0.0311777	-1.31845	down		Seita.3G010200	1.89733e-11	1.37184	up		Seita.2G341500	3.22697e-06	-1.38409	down							Seita.3G131800	0.00114467	1.19982	up		Seita.2G156700	0.000141648	-1.70226	down
Seita.3G072400	0.00055483	-1.61125	down		Seita.4G282500	0.00254479	Inf	up		Seita.3G344500	0.000110227	-4.56894	down		Seita.2G199100	1.09105e-30	-4.48253	down		Seita.6G144900	0.00100181	5.56436	up		Seita.3G011900	2.18368e-11	-2.49701	down		Seita.2G341700	1.85637e-08	-2.19655	down							Seita.3G131900	2.58528e-44	3.52898	up		Seita.2G157200	1.85717e-05	2.92963	up
Seita.3G074300	2.19637e-06	-2.57954	down		Seita.4G288400	0.017611	1.94919	up		Seita.3G347600	0.0472053	1.8816	up		Seita.2G199800	3.98515e-06	-2.44864	down		Seita.6G145600	0.01357	-2.8066	down		Seita.3G013000	0.0354763	-1.10412	down		Seita.2G341800	1.7309e-14	-3.02936	down							Seita.3G133300	2.54612e-16	1.96121	up		Seita.2G157400	0.000141428	-1.48493	down
Seita.3G076900	2.21002e-07	-3.46719	down		Seita.5G002800	0.000853917	-2.49716	down		Seita.3G352100	0.00410726	-1.38452	down		Seita.2G200400	3.35838e-07	-1.05383	down		Seita.6G152300	1.29343e-07	2.97277	up		Seita.3G013100	8.11272e-12	-1.38941	down		Seita.2G341900	1.48807e-12	-3.11065	down							Seita.3G133900	0.00014494	-2.26226	down		Seita.2G158000	0.000334586	-1.21394	down
Seita.3G077500	1.66979e-12	-Inf	down		Seita.5G002900	0.0261124	-1.82229	down		Seita.3G352300	0.00015117	-3.13473	down		Seita.2G200800	5.25608e-35	2.69346	up		Seita.6G152500	3.69306e-05	2.41126	up		Seita.3G014100	0.000439049	-1.40058	down		Seita.2G342300	6.53903e-51	-3.63833	down							Seita.3G136100	0.0475255	1.09964	up		Seita.2G158400	0.0195772	1.66023	up
Seita.3G077600	0.0080757	-2.00469	down		Seita.5G003200	0.0142622	2.22725	up		Seita.3G353200	0.000336764	2.44045	up		Seita.2G200900	0.000114677	1.57821	up		Seita.6G155100	3.07965e-08	-5.28416	down		Seita.3G014700	2.51125e-12	-5.00711	down		Seita.2G342500	0.000140616	-2.02517	down							Seita.3G136400	6.1861e-13	2.70962	up		Seita.2G159400	3.03859e-15	-4.13036	down
Seita.3G077900	1.79709e-07	-4.20273	down		Seita.5G003600	0.0337125	-1.58872	down		Seita.3G353500	1.19578e-05	4.24408	up		Seita.2G201000	4.92977e-07	1.66428	up		Seita.6G156100	0.0190965	-1.56506	down		Seita.3G014800	0.032246	-1.28026	down		Seita.2G343200	1.57769e-08	1.84361	up							Seita.3G138700	6.16957e-84	5.92534	up		Seita.2G159600	6.00526e-28	6.45786	up
Seita.3G078900	0.0266066	-1.82537	down		Seita.5G007400	0.0204881	-4.7479	down		Seita.3G354700	0.0415733	-1.15928	down		Seita.2G202100	6.4033e-10	1.53161	up		Seita.6G157400	0.0351722	-1.38346	down		Seita.3G014900	5.06834e-06	1.78907	up		Seita.2G343600	0.0433892	1.12818	up							Seita.3G139000	1.28898e-15	1.94482	up		Seita.2G159900	0.00109552	1.75244	up
Seita.3G079000	0.000162725	-2.668	down		Seita.5G010300	0.048065	-2.03334	down		Seita.3G356500	0.0462567	1.22648	up		Seita.2G202200	0.0136483	1.3216	up		Seita.6G158800	0.0388893	-5.074	down		Seita.3G018200	6.56027e-06	-2.62874	down		Seita.2G343700	8.21301e-08	-1.19655	down							Seita.3G139300	0.00010806	-1.01662	down		Seita.2G161300	0.00252346	-1.72601	down
Seita.3G080700	0.000461705	-3.59778	down		Seita.5G011600	8.86096e-12	4.98485	up		Seita.3G357000	0.0226659	-1.32653	down		Seita.2G203000	0.000366663	-1.72118	down		Seita.6G158900	0.00192255	-2.37471	down		Seita.3G019200	0.00329516	1.07706	up		Seita.2G347100	1.12863e-15	-2.26997	down							Seita.3G140600	0.0230678	-1.17067	down		Seita.2G161800	0.00102389	1.30264	up
Seita.3G082800	0.0157817	-1.77688	down		Seita.5G011800	7.27976e-13	5.41273	up		Seita.3G357100	5.87163e-05	-1.65548	down		Seita.2G204600	0.0322182	-1.21778	down		Seita.6G159700	0.00282603	2.52365	up		Seita.3G020400	4.3506e-32	-2.43645	down		Seita.2G347200	4.2318e-06	-3.33949	down							Seita.3G140700	1.74025e-23	2.60604	up		Seita.2G162800	9.34304e-09	-1.55012	down
Seita.3G083400	0.0494989	-1.47139	down		Seita.5G012100	1.33246e-05	5.48748	up		Seita.3G357600	0.0015533	2.55906	up		Seita.2G205100	7.99294e-07	-1.44617	down		Seita.6G162500	0.0441648	1.28181	up		Seita.3G022800	2.6094e-08	-1.21289	down		Seita.2G348000	0.000625637	-2.12854	down							Seita.3G141400	0.00286426	-1.4556	down		Seita.2G162900	0.0038483	-1.00446	down
Seita.3G084300	0.00212756	1.48094	up		Seita.5G014300	9.74794e-05	7.57112	up		Seita.3G357700	1.27138e-14	3.24747	up		Seita.2G205400	1.40761e-18	-2.45667	down		Seita.6G164900	0.0128689	-1.52326	down		Seita.3G024600	2.23703e-08	-2.4284	down		Seita.2G348200	0.0446267	-1.04044	down							Seita.3G141800	3.69727e-09	-1.44565	down		Seita.2G163200	0.000205061	-1.02574	down
Seita.3G084500	1.82786e-17	-4.29037	down		Seita.5G015400	0.00676349	2.41	up		Seita.3G363400	4.75722e-07	-2.1547	down		Seita.2G205600	6.63041e-09	1.22679	up		Seita.6G166200	0.0102511	-2.79575	down		Seita.3G026900	9.12604e-25	-5.88647	down		Seita.2G348600	0.000117093	-1.25357	down							Seita.3G142400	2.59327e-05	1.23847	up		Seita.2G165500	0.000143014	-1.03359	down
Seita.3G087200	2.40985e-10	-5.10466	down		Seita.5G021600	0.0135817	-2.14388	down		Seita.3G363500	0.0122851	-1.16383	down		Seita.2G205700	0.00195571	-1.3771	down		Seita.6G167200	2.83144e-07	-Inf	down		Seita.3G028500	4.04733e-06	-2.34514	down		Seita.2G349700	1.85375e-06	-1.10555	down							Seita.3G142800	8.82634e-05	-1.02243	down		Seita.2G167700	0.000808586	-2.05943	down
Seita.3G087300	3.14667e-12	-6.25554	down		Seita.5G021800	0.0106126	2.15275	up		Seita.3G364000	7.1293e-08	-2.39849	down		Seita.2G206000	0.0404819	1.03171	up		Seita.6G167300	0.019671	-2.55807	down		Seita.3G029000	1.23513e-10	-1.92731	down		Seita.2G350200	3.28456e-22	-2.22922	down							Seita.3G143800	7.97247e-08	-1.81566	down		Seita.2G167900	9.24583e-07	-1.47424	down
Seita.3G087700	4.16056e-06	-6.33576	down		Seita.5G021900	0.00714505	-4.22054	down		Seita.3G367000	0.0191594	2.18199	up		Seita.2G206200	0.00169064	1.11844	up		Seita.6G170200	0.0287164	-2.48561	down		Seita.3G030200	0.0103311	1.69075	up		Seita.2G350300	2.68994e-06	-1.72918	down							Seita.3G144000	1.01312e-07	1.46322	up		Seita.2G168000	2.42741e-07	2.66133	up
Seita.3G087800	0.00196849	-3.8201	down		Seita.5G022000	0.00904911	-1.8588	down		Seita.3G367100	0.00871488	-1.54339	down		Seita.2G208300	6.81141e-05	-1.40462	down		Seita.6G175700	1.83688e-33	-7.71181	down		Seita.3G031300	1.53528e-20	2.03856	up		Seita.2G350400	1.91119e-10	-1.49711	down							Seita.3G144600	1.08328e-06	-1.23412	down		Seita.2G168200	1.52963e-06	-1.78577	down
Seita.3G088000	1.06673e-09	-6.42155	down		Seita.5G025200	1.73122e-08	3.99773	up		Seita.3G368700	0.0114706	1.09761	up		Seita.2G208600	6.45346e-05	-1.25062	down		Seita.6G179000	6.41894e-06	-6.67708	down		Seita.3G032700	1.74452e-07	-2.98661	down		Seita.2G350500	0.0436173	-1.13131	down							Seita.3G146800	0.000720446	-1.77585	down		Seita.2G169700	1.31058e-11	1.78662	up
Seita.3G088900	2.68565e-12	-Inf	down		Seita.5G025500	0.00425858	2.41519	up		Seita.3G369200	2.15355e-05	4.22638	up		Seita.2G208900	0.029158	-1.17346	down		Seita.6G179200	4.79377e-06	-5.62307	down		Seita.3G033500	2.20565e-08	-1.21365	down		Seita.2G351000	0.0150534	-1.22518	down							Seita.3G147200	4.56441e-06	2.59164	up		Seita.2G170600	4.24868e-05	2.54567	up
Seita.3G089400	3.52901e-05	-2.74492	down		Seita.5G026400	0.0158578	1.82177	up		Seita.3G369800	0.0147089	-1.33562	down		Seita.2G209000	0.00579091	-1.54149	down		Seita.6G179400	0.00196112	-3.32633	down		Seita.3G035500	1.63898e-21	2.13987	up		Seita.2G351100	0.0375349	-1.08358	down							Seita.3G147500	1.28133e-16	2.29604	up		Seita.2G172800	0.000103559	-2.04991	down
Seita.3G091400	0.0192233	1.62069	up		Seita.5G026600	0.0113745	3.04371	up		Seita.3G370000	0.0012661	-1.55568	down		Seita.2G209100	2.18198e-08	-1.45989	down		Seita.6G181300	0.000240748	4.51873	up		Seita.3G035700	4.94917e-08	2.88816	up		Seita.2G351400	1.03701e-08	1.31275	up							Seita.3G147600	0.000117159	1.03579	up		Seita.2G174500	8.7227e-34	-3.80827	down
Seita.3G093300	0.00169377	-4.28377	down		Seita.5G026800	1.86208e-10	9.94022	up		Seita.3G370300	3.08967e-08	-4.56711	down		Seita.2G209900	2.46962e-15	-2.12601	down		Seita.6G182500	0.00288807	2.19619	up		Seita.3G037000	1.36281e-12	-2.31495	down		Seita.2G351900	0.00261705	1.67872	up							Seita.3G147700	2.36943e-17	2.2739	up		Seita.2G174800	8.76185e-06	1.50142	up
Seita.3G093500	1.31541e-06	2.25383	up		Seita.5G027400	0.0125506	-1.93662	down		Seita.3G373000	0.000224295	2.36062	up		Seita.2G210800	3.73024e-15	2.75467	up		Seita.6G182700	0.00134048	-1.95942	down		Seita.3G037800	0.00882538	-1.1564	down		Seita.2G352000	3.45447e-12	1.54323	up							Seita.3G148400	0.00325182	2.05943	up		Seita.2G175000	0.000102927	1.20371	up
Seita.3G094000	0.00036526	-2.42849	down		Seita.5G027600	0.00621111	-2.24298	down		Seita.3G373100	2.55732e-11	3.18994	up		Seita.2G211000	4.26752e-06	1.73974	up		Seita.6G186200	0.00475715	-2.96964	down		Seita.3G040300	1.62599e-08	-2.42898	down		Seita.2G352200	1.05909e-22	-2.24204	down							Seita.3G149000	4.57295e-05	-2.22721	down		Seita.2G175600	0.00566199	-1.31806	down
Seita.3G094600	2.08934e-05	2.98731	up		Seita.5G028100	0.0306942	1.77914	up		Seita.3G373500	0.00578122	1.72809	up		Seita.2G211100	1.05686e-16	-1.66259	down		Seita.6G188600	0.000174187	2.455	up		Seita.3G042200	2.21476e-10	3.6112	up		Seita.2G352700	1.5166e-82	-5.47644	down							Seita.3G150400	7.53384e-07	1.30506	up		Seita.2G175700	0.00705996	-1.50282	down
Seita.3G094900	0.0453474	1.14412	up		Seita.5G028200	0.0280309	2.27831	up		Seita.3G375800	0.00782326	-1.18174	down		Seita.2G211200	0.00438406	1.02989	up		Seita.6G194700	6.96311e-09	7.36134	up		Seita.3G042300	1.02939e-15	-2.1728	down		Seita.2G352900	0.013181	1.02539	up							Seita.3G150900	0.0298601	1.21487	up		Seita.2G175800	6.73259e-20	-2.53784	down
Seita.3G096400	0.00452897	-1.50276	down		Seita.5G028400	0.0358564	-2.57544	down		Seita.3G380200	3.60942e-09	-2.84943	down		Seita.2G211800	0.0355887	-1.19594	down		Seita.6G194800	8.5664e-07	-2.84473	down		Seita.3G043500	3.3899e-06	-1.61153	down		Seita.2G353400	2.41431e-24	3.41925	up							Seita.3G151000	9.54306e-06	1.15628	up		Seita.2G176800	7.66591e-12	-1.8097	down
Seita.3G096800	0.000479705	-1.80174	down		Seita.5G028500	8.86096e-12	-4.74818	down		Seita.3G382700	0.0130559	1.22658	up		Seita.2G212400	0.00264623	-1.17912	down		Seita.6G195300	0.00521138	-2.07395	down		Seita.3G044200	1.9635e-08	-1.18719	down		Seita.2G354000	1.90617e-07	-2.14805	down							Seita.3G151100	4.23466e-27	3.07492	up		Seita.2G177000	0.0274899	1.35362	up
Seita.3G096900	0.000106219	-1.94378	down		Seita.5G035900	0.0217668	-2.70679	down		Seita.3G385200	0.00261066	2.42514	up		Seita.2G212900	1.55808e-14	-3.45385	down		Seita.6G202400	1.25417e-05	2.6363	up		Seita.3G044600	3.47686e-12	-1.42013	down		Seita.2G354800	0.000587047	-1.02275	down							Seita.3G152100	4.52648e-05	1.09466	up		Seita.2G177500	1.19492e-13	2.14723	up
Seita.3G097200	2.91775e-05	-2.91204	down		Seita.5G037900	0.00743883	-2.076	down		Seita.3G386800	6.83078e-06	-1.92836	down		Seita.2G213800	2.67534e-06	-1.67848	down		Seita.6G203200	0.000165104	2.22592	up		Seita.3G047300	0.00520461	-1.23816	down		Seita.2G355900	0.000992694	2.12125	up							Seita.3G153400	8.44118e-26	-5.47125	down		Seita.2G178900	9.83933e-09	2.16203	up
Seita.3G097400	0.000142329	-1.75661	down		Seita.5G038300	0.0301921	2.46006	up		Seita.3G390000	6.33313e-05	2.01133	up		Seita.2G214000	4.91477e-13	-2.15729	down		Seita.6G203400	0.0101686	-2.87254	down		Seita.3G048200	0.0226886	-1.0388	down		Seita.2G356100	1.57327e-09	-5.39837	down							Seita.3G153500	0.0075537	1.14094	up		Seita.2G179500	2.18283e-24	2.92126	up
Seita.3G097600	0.0441722	-1.02583	down		Seita.5G042400	3.51124e-09	Inf	up		Seita.3G391000	1.2869e-06	3.94767	up		Seita.2G214100	2.51951e-10	-1.98945	down		Seita.6G204500	0.0208831	-1.7617	down		Seita.3G048500	0.0012646	-1.58201	down		Seita.2G356300	0.00748197	-1.26574	down							Seita.3G153600	0.0014423	-1.42237	down		Seita.2G179600	1.73756e-07	-1.3977	down
Seita.3G101000	0.0251832	-1.76645	down		Seita.5G042600	1.14425e-06	8.82274	up		Seita.3G391400	0.00162418	-1.56875	down		Seita.2G214700	2.56049e-08	1.29064	up		Seita.6G208900	0.0309131	-1.86682	down		Seita.3G049100	1.34042e-05	-1.84827	down		Seita.2G356700	1.70109e-07	-1.20661	down							Seita.3G154700	0.0312636	1.03155	up		Seita.2G180100	5.99845e-05	1.12522	up
Seita.3G101300	0.00174018	4.40686	up		Seita.5G042700	0.00655624	-5.55135	down		Seita.3G394500	1.54429e-08	-2.81249	down		Seita.2G216400	0.00215349	-1.69042	down		Seita.6G211600	0.000575859	3.65656	up		Seita.3G050300	4.80986e-07	-1.04672	down		Seita.2G356900	4.25709e-17	-2.36404	down							Seita.3G154900	0.0252973	-1.00339	down		Seita.2G180300	0.000471672	1.03197	up
Seita.3G102200	9.23129e-05	2.70165	up		Seita.5G042800	0.0424377	1.79107	up		Seita.3G396400	0.000575613	1.88599	up		Seita.2G216500	0.0391894	1.13985	up		Seita.6G213100	0.0419895	-1.50239	down		Seita.3G050700	1.10416e-08	1.5178	up		Seita.2G357800	2.48669e-13	-1.60701	down							Seita.3G155600	0.0314304	1.30282	up		Seita.2G181200	3.88099e-06	-2.09605	down
Seita.3G102800	4.3386e-08	-3.98003	down		Seita.5G043200	0.00553235	-2.00146	down		Seita.3G397400	0.00557141	-1.1914	down		Seita.2G216600	5.54214e-08	-1.11297	down		Seita.6G219700	0.0419895	-1.8681	down		Seita.3G051000	5.98604e-08	-1.13231	down		Seita.2G358300	8.86073e-08	-2.81302	down							Seita.3G156200	0.0462233	-1.7189	down		Seita.2G181600	4.3343e-09	1.91511	up
Seita.3G103200	0.00202544	-1.51249	down		Seita.5G044400	0.0291332	-1.86857	down		Seita.3G398700	0.0317512	-1.88787	down		Seita.2G216900	0.00122115	-1.8638	down		Seita.6G220000	0.0183834	-1.74086	down		Seita.3G052400	0.0220454	-1.33303	down		Seita.2G358400	4.61154e-08	-2.11889	down							Seita.3G157300	2.82932e-05	1.12183	up		Seita.2G182200	0.00856608	-1.5781	down
Seita.3G104900	2.29376e-05	-4.41566	down		Seita.5G044800	0.0152883	-1.84955	down		Seita.3G402100	2.75785e-05	1.7375	up		Seita.2G217200	1.78037e-24	-3.20883	down		Seita.6G221700	0.00796214	2.46996	up		Seita.3G053900	0.000306875	-1.75902	down		Seita.2G360500	0.000216605	-1.26705	down							Seita.3G157400	1.76388e-16	3.72454	up		Seita.2G182300	0.038474	1.03734	up
Seita.3G105100	0.0019657	1.55936	up		Seita.5G047700	0.0120574	-1.91743	down		Seita.3G403800	0.0311965	1.43008	up		Seita.2G217500	8.08178e-56	-3.90864	down		Seita.6G224300	0.000183507	-3.0784	down		Seita.3G054600	9.71575e-09	-3.60024	down		Seita.2G360800	1.30421e-06	-1.84051	down							Seita.3G157500	1.24324e-10	2.64317	up		Seita.2G182800	8.30074e-07	-1.35193	down
Seita.3G106800	0.00137241	-2.08548	down		Seita.5G051900	0.00577504	-2.01864	down		Seita.3G404200	1.2495e-06	2.36918	up		Seita.2G217800	0.00203811	1.79328	up		Seita.6G230000	0.036694	-1.77762	down		Seita.3G055400	0.00121618	4.71342	up		Seita.2G361800	1.19965e-17	-2.07154	down							Seita.3G161200	0.0475255	-1.22649	down		Seita.2G183300	1.87115e-18	-4.19457	down
Seita.3G108800	0.000287779	-2.85758	down		Seita.5G052500	0.0287035	1.62503	up		Seita.3G404400	0.00941992	1.30818	up		Seita.2G218700	1.79145e-50	3.65231	up		Seita.6G235000	0.014621	1.65948	up		Seita.3G055700	1.0398e-12	1.65314	up		Seita.2G363400	1.5938e-08	-1.48626	down							Seita.3G161800	0.001081	1.81689	up		Seita.2G186000	0.0073868	1.20113	up
Seita.3G110800	9.59942e-07	-7.9143	down		Seita.5G052700	0.00267209	3.67286	up		Seita.3G405000	0.000426118	-1.46188	down		Seita.2G218800	1.16962e-05	1.49743	up		Seita.6G236100	0.0261616	1.71819	up		Seita.3G056000	8.78893e-11	-1.6281	down		Seita.2G364700	1.36852e-14	-2.25005	down							Seita.3G163200	9.0662e-06	-1.17992	down		Seita.2G187000	0.00595432	-1.57211	down
Seita.3G111200	5.89987e-11	-3.59953	down		Seita.5G053000	0.0033877	-2.38556	down		Seita.3G405600	7.82902e-08	4.5468	up		Seita.2G219300	1.18427e-07	-1.21847	down		Seita.6G239000	0.000233692	-Inf	down		Seita.3G056400	5.20973e-12	-1.5763	down		Seita.2G365000	1.2435e-22	-2.19225	down							Seita.3G164700	0.000142424	2.15836	up		Seita.2G187100	0.0103175	1.02173	up
Seita.3G111700	0.0118405	1.83702	up		Seita.5G055100	4.07778e-05	-2.75838	down		Seita.3G406500	0.0301015	2.46114	up		Seita.2G219400	1.70105e-10	-1.28376	down		Seita.6G240000	0.0491051	-1.24746	down		Seita.3G057100	1.13323e-11	1.70671	up		Seita.2G365400	0.0473655	-1.05446	down							Seita.3G165100	1.91735e-11	1.83549	up		Seita.2G187200	6.83803e-14	1.98841	up
Seita.3G113000	0.00452146	-2.16203	down		Seita.5G055600	0.0178014	2.75486	up		Seita.3G407000	0.00513224	-1.23101	down		Seita.2G219700	0.000494195	-2.01941	down		Seita.6G240600	0.0113246	2.67443	up		Seita.3G057300	0.0024032	-1.1789	down		Seita.2G365500	1.7005e-66	-7.15278	down							Seita.3G167500	1.54282e-06	-2.64149	down		Seita.2G187300	1.1886e-09	-4.50189	down
Seita.3G113500	0.00517759	3.57926	up		Seita.5G056500	0.0151781	-3.30264	down		Seita.3G407300	0.000754529	-2.20703	down		Seita.2G220300	0.0334723	1.14668	up		Seita.6G240900	5.05415e-07	4.90359	up		Seita.3G059500	0.000320673	-1.67245	down		Seita.2G365700	4.4857e-32	-2.9602	down							Seita.3G167600	1.90699e-10	-2.55072	down		Seita.2G187400	3.73964e-13	-3.34684	down
Seita.3G115700	1.33359e-05	-2.12213	down		Seita.5G057200	0.00687127	3.67268	up		Seita.3G408500	0.0285062	1.83867	up		Seita.2G221100	0.00656253	-1.10584	down		Seita.6G243300	0.00372436	-6.26586	down		Seita.3G060600	0.00151775	-1.51024	down		Seita.2G365800	4.05881e-31	-3.4013	down							Seita.3G168400	5.85013e-06	-2.27146	down		Seita.2G187800	3.45617e-38	-4.47138	down
Seita.3G116300	5.36073e-07	2.36668	up		Seita.5G057300	0.000222519	4.93102	up		Seita.4G000900	0.0245577	-1.25782	down		Seita.2G221700	8.91437e-18	1.74833	up		Seita.6G244100	0.00688661	-3.00508	down		Seita.3G060800	5.27239e-09	1.28415	up		Seita.2G368200	2.39888e-07	-1.19148	down							Seita.3G170100	9.55513e-07	-1.22639	down		Seita.2G187900	5.80075e-17	-3.18271	down
Seita.3G119400	0.0253111	1.48433	up		Seita.5G059300	0.0480866	1.9124	up		Seita.4G003600	0.000496869	-1.7248	down		Seita.2G221800	5.91551e-22	-4.53709	down		Seita.6G249100	0.000766173	3.17939	up		Seita.3G062400	0.000137664	-1.38759	down		Seita.2G368400	9.64953e-15	1.75292	up							Seita.3G170300	3.95474e-07	1.54289	up		Seita.2G188200	6.33997e-06	-1.54656	down
Seita.3G120900	0.0154136	-1.57529	down		Seita.5G067100	0.000683729	-2.3976	down		Seita.4G003800	6.44054e-31	-5.08075	down		Seita.2G221900	0.000123499	-2.14023	down		Seita.6G251100	0.0104541	-3.4174	down		Seita.3G063200	1.22258e-08	-1.33671	down		Seita.2G368900	5.94268e-28	-2.77513	down							Seita.3G170700	2.02344e-05	2.35433	up		Seita.2G188300	4.10735e-06	2.73036	up
Seita.3G122800	1.15732e-05	-2.08075	down		Seita.5G067900	0.0223526	4.82768	up		Seita.4G005300	7.14097e-05	-2.37596	down		Seita.2G222600	0.000559716	-1.87269	down		Seita.6G251800	0.0395555	1.37327	up		Seita.3G064300	1.00068e-07	-1.1134	down		Seita.2G370900	2.01548e-06	-1.11932	down							Seita.3G171400	0.00196214	1.93124	up		Seita.2G188800	1.20575e-09	-1.86582	down
Seita.3G123000	0.00665703	-1.70243	down		Seita.5G070500	0.0311173	-2.58268	down		Seita.4G006100	5.71083e-05	-1.68806	down		Seita.2G222800	2.17753e-05	-1.1968	down		Seita.6G252800	0.00976542	1.66721	up		Seita.3G064600	5.42591e-21	-2.04489	down		Seita.2G371400	0.00193051	1.20729	up							Seita.3G174900	2.66398e-09	-1.57453	down		Seita.2G189100	2.70454e-09	-2.14829	down
Seita.3G123300	0.000407205	-1.75123	down		Seita.5G073800	0.011989	-1.91368	down		Seita.4G006300	0.0106003	-2.03476	down		Seita.2G223700	8.57803e-51	-3.44304	down		Seita.7G004200	0.00704614	3.27231	up		Seita.3G064700	1.97851e-17	1.93722	up		Seita.2G371600	1.12684e-06	-1.96748	down							Seita.3G175700	1.63972e-14	1.92492	up		Seita.2G189300	0.000907312	-1.50255	down
Seita.3G123500	0.00723629	-1.82076	down		Seita.5G073900	0.0191888	-2.90755	down		Seita.4G010800	0.00054864	-1.49583	down		Seita.2G224000	2.74602e-05	-2.22203	down		Seita.7G006300	0.0290317	-3.35067	down		Seita.3G066700	1.65457e-09	-2.00028	down		Seita.2G372600	1.66494e-13	-3.1858	down							Seita.3G176300	0.021907	1.31274	up		Seita.2G189400	4.88317e-06	-1.55227	down
Seita.3G123800	0.049955	2.36237	up		Seita.5G075600	0.00100296	-2.31916	down		Seita.4G011200	0.0274858	3.66069	up		Seita.2G224400	0.000478114	-1.37907	down		Seita.7G009200	7.54586e-11	4.10038	up		Seita.3G068600	3.4819e-10	-2.71444	down		Seita.2G373200	0.0236321	1.30119	up							Seita.3G177300	0.000253939	-1.25698	down		Seita.2G190100	9.21575e-07	-1.87724	down
Seita.3G124500	0.0215739	-1.2093	down		Seita.5G079300	0.0218876	-2.95479	down		Seita.4G013400	0.000100737	-1.65902	down		Seita.2G224500	1.97303e-07	-3.06804	down		Seita.7G010200	0.00376085	-3.18438	down		Seita.3G068800	1.8408e-18	-4.74244	down		Seita.2G374300	6.6904e-20	-5.96551	down							Seita.3G177600	4.45197e-14	-1.90108	down		Seita.2G190400	0.00110669	-1.08094	down
Seita.3G124600	0.0225091	-1.22051	down		Seita.5G081100	0.000136305	-4.79562	down		Seita.4G013500	0.00513426	-1.92452	down		Seita.2G225100	5.89817e-12	-1.50297	down		Seita.7G021400	0.00482579	3.25226	up		Seita.3G068900	5.01634e-19	-4.59062	down		Seita.2G377800	1.23746e-10	-1.41119	down							Seita.3G179600	1.32602e-10	-1.59598	down		Seita.2G190900	0.000275906	1.45527	up
Seita.3G128000	0.0100105	-1.62617	down		Seita.5G082400	0.00847894	2.13687	up		Seita.4G016400	0.0483626	6.65231	up		Seita.2G226400	3.20437e-28	-2.79231	down		Seita.7G029500	0.0419895	-3.19842	down		Seita.3G070100	2.70004e-08	2.44651	up		Seita.2G379300	1.28839e-08	-1.26937	down							Seita.3G180800	9.63996e-07	-3.37431	down		Seita.2G191000	6.33985e-09	-1.54779	down
Seita.3G128900	0.0301288	-1.45954	down		Seita.5G083600	0.0125937	-3.3073	down		Seita.4G019400	0.00417095	-2.34854	down		Seita.2G226600	0.0381274	1.15584	up		Seita.7G030800	0.0196794	-3.2935	down		Seita.3G070200	0.00450288	1.14993	up		Seita.2G379600	0.000481453	-1.51019	down							Seita.3G181100	0.0017857	1.17622	up		Seita.2G191300	0.0130156	1.26338	up
Seita.3G129000	0.00124896	-1.49641	down		Seita.5G085900	0.0078435	-3.97654	down		Seita.4G019500	2.48163e-05	-3.53564	down		Seita.2G227400	0.0152428	-1.23773	down		Seita.7G032100	0.00832603	2.23578	up		Seita.3G070800	1.35318e-08	1.27241	up		Seita.2G379700	0.0021128	-1.91092	down							Seita.3G181900	0.00018718	-1.622	down		Seita.2G192400	6.06173e-44	-4.08234	down
Seita.3G129200	4.76508e-07	-3.7691	down		Seita.5G086500	0.00420048	3.74383	up		Seita.4G019700	0.00514847	-1.61904	down		Seita.2G228300	4.20434e-31	-3.14596	down		Seita.7G039900	0.0251147	2.48002	up		Seita.3G072600	2.06623e-16	1.69399	up		Seita.2G379900	1.57588e-07	-1.39284	down							Seita.3G182000	0.0247462	1.17156	up		Seita.2G193000	1.27673e-38	3.63599	up
Seita.3G131200	0.0290609	-1.14283	down		Seita.5G086800	0.00228774	Inf	up		Seita.4G020000	0.0123214	1.87042	up		Seita.2G228400	3.33619e-07	-1.17396	down		Seita.7G045400	0.000908597	2.41941	up		Seita.3G072700	4.4538e-27	-7.2429	down		Seita.2G380400	7.82843e-09	-1.58777	down							Seita.3G182400	5.56899e-08	2.38765	up		Seita.2G193200	4.3052e-07	1.5979	up
Seita.3G132400	4.24705e-19	-4.61879	down		Seita.5G087300	0.0449948	2.3966	up		Seita.4G021700	0.0148864	1.12907	up		Seita.2G229000	7.62146e-05	-1.62151	down		Seita.7G046200	0.0491933	1.33244	up		Seita.3G073300	0.000587374	-1.51316	down		Seita.2G380900	6.2073e-06	-2.46562	down							Seita.3G184100	5.81461e-06	-1.15063	down		Seita.2G193300	0.00767146	-1.46077	down
Seita.3G132500	0.0480607	1.1028	up		Seita.5G088300	0.0155931	2.50937	up		Seita.4G022700	0.000138555	1.89558	up		Seita.2G229100	2.26287e-14	-3.17691	down		Seita.7G047000	0.0111978	1.54404	up		Seita.3G073900	4.68111e-07	-1.19896	down		Seita.2G381500	3.13121e-05	1.81597	up							Seita.3G184400	1.39912e-16	-3.51836	down		Seita.2G193900	9.81239e-19	2.39785	up
Seita.3G132600	0.0475182	-1.02835	down		Seita.5G090200	0.00574224	-1.9938	down		Seita.4G022900	0.0268849	1.14327	up		Seita.2G229300	0.000395401	1.36825	up		Seita.7G048300	0.0135409	-1.7062	down		Seita.3G074300	6.96377e-17	-2.41173	down		Seita.2G381600	5.9535e-11	1.82254	up							Seita.3G184900	9.39527e-15	-1.85277	down		Seita.2G194000	5.08797e-12	-1.96427	down
Seita.3G132800	0.0256585	1.12071	up		Seita.5G090700	0.00228265	2.26713	up		Seita.4G023300	0.0271301	1.01991	up		Seita.2G229900	1.84547e-05	4.18889	up		Seita.7G058300	2.74009e-07	-4.96928	down		Seita.3G074700	2.02992e-11	3.54676	up		Seita.2G381700	1.73884e-05	1.30111	up							Seita.3G185100	0.000512432	-1.41146	down		Seita.2G194500	0.00105795	-1.72633	down
Seita.3G133300	1.42294e-17	3.96176	up		Seita.5G092000	0.0484703	-2.70147	down		Seita.4G024000	0.0217692	1.10452	up		Seita.2G230500	1.13711e-46	-2.9736	down		Seita.7G060200	2.6451e-13	4.32273	up		Seita.3G075100	3.79267e-10	-1.42765	down		Seita.2G381800	2.56896e-10	-1.5403	down							Seita.3G189400	1.70452e-10	-1.68719	down		Seita.2G196600	0.0353402	1.02699	up
Seita.3G134300	3.74089e-06	-8.37024	down		Seita.5G092400	0.0242957	3.81302	up		Seita.4G025500	5.71739e-08	-3.38736	down		Seita.2G230700	6.72195e-07	-2.89536	down		Seita.7G061000	0.00639317	-1.89359	down		Seita.3G075300	2.8335e-05	-1.43018	down		Seita.2G382800	0.00314881	-1.94457	down							Seita.3G189700	5.21516e-11	-1.72432	down		Seita.2G197500	2.84467e-06	2.13175	up
Seita.3G135900	0.0136597	-2.85531	down		Seita.5G093000	1.41673e-06	4.00525	up		Seita.4G025700	5.28362e-08	-2.42922	down		Seita.2G230800	2.38566e-13	-2.6468	down		Seita.7G061300	0.00788485	-2.4173	down		Seita.3G075400	4.42111e-07	-2.16713	down		Seita.2G382900	5.82137e-12	-1.8285	down							Seita.3G190000	0.000424811	2.61589	up		Seita.2G198700	0.000254425	-1.92669	down
Seita.3G136100	0.00623104	-2.0902	down		Seita.5G095800	0.00477095	-1.97511	down		Seita.4G026700	0.00048178	-4.42767	down		Seita.2G231300	0.0102996	-1.48607	down		Seita.7G064200	0.00126968	-2.93214	down		Seita.3G076800	0.0295176	-1.22992	down		Seita.2G384700	0.00954219	-1.11505	down							Seita.3G192600	0.00010483	-1.72646	down		Seita.2G198800	4.58682e-09	-2.11847	down
Seita.3G136400	2.012e-09	3.13764	up		Seita.5G096100	0.00523842	2.53178	up		Seita.4G029600	0.000306905	-1.97378	down		Seita.2G231400	4.31932e-09	-4.22536	down		Seita.7G065800	0.0143135	-4.48607	down		Seita.3G077100	7.09502e-05	1.32506	up		Seita.2G386000	4.3863e-05	1.27325	up							Seita.3G192900	1.07775e-15	-3.08643	down		Seita.2G199100	2.70722e-60	-5.69841	down
Seita.3G136600	0.000229031	-2.16631	down		Seita.5G096600	0.0383351	1.76543	up		Seita.4G029700	2.12485e-05	-1.99197	down		Seita.2G231800	1.0127e-32	-4.05869	down		Seita.7G073100	0.00186593	9.43266	up		Seita.3G078200	0.0164586	-1.38428	down		Seita.2G386900	1.44684e-05	-2.24691	down							Seita.3G193800	6.89994e-11	3.05866	up		Seita.2G199400	3.61753e-05	-1.33673	down
Seita.3G136700	0.0351973	-1.65315	down		Seita.5G098300	0.0495197	-1.72457	down		Seita.4G033500	0.0181381	2.03636	up		Seita.2G232600	1.4712e-07	-1.6958	down		Seita.7G073600	0.00731091	-4.55631	down		Seita.3G078700	5.4274e-06	1.76797	up		Seita.2G387100	1.17083e-08	1.34726	up							Seita.3G194800	0.00607104	-1.59369	down		Seita.2G199800	5.15995e-16	-3.98492	down
Seita.3G136900	0.00151714	-3.70202	down		Seita.5G102000	0.000105392	4.85118	up		Seita.4G035500	1.88393e-05	3.06707	up		Seita.2G232900	0.0490712	-1.49768	down		Seita.7G074200	0.0342725	-1.38883	down		Seita.3G079000	7.93226e-78	-4.32836	down		Seita.2G387800	0.000835753	-1.08102	down							Seita.3G196200	4.64069e-29	-2.72564	down		Seita.2G199900	2.97901e-09	-3.42182	down
Seita.3G137800	1.92368e-09	-3.28441	down		Seita.5G104100	2.76623e-05	-2.8782	down		Seita.4G040100	0.0412256	2.58647	up		Seita.2G233400	1.04562e-06	1.31465	up		Seita.7G074700	0.00353357	1.92025	up		Seita.3G082000	3.3707e-11	-4.2464	down		Seita.2G388200	2.1e-05	-1.56162	down							Seita.3G196700	0.0294163	-1.77878	down		Seita.2G200800	1.06601e-34	3.48458	up
Seita.3G138400	4.17358e-06	-3.51942	down		Seita.5G110600	0.0208853	3.92604	up		Seita.4G042100	0.00275414	-3.64261	down		Seita.2G233700	5.9061e-17	-3.17242	down		Seita.7G075500	0.00848967	-1.7903	down		Seita.3G082100	2.04545e-16	-2.68056	down		Seita.2G388400	3.50794e-07	-1.19968	down							Seita.3G196900	4.79569e-07	1.55459	up		Seita.2G201200	0.0116696	1.45548	up
Seita.3G138500	1.4182e-08	-4.08651	down		Seita.5G112900	1.18205e-05	-4.65431	down		Seita.4G043100	0.00167907	1.95535	up		Seita.2G234000	2.65348e-13	-4.86876	down		Seita.7G076500	1.14888e-12	-7.10623	down		Seita.3G083300	2.90042e-06	-2.44204	down		Seita.2G390400	2.18513e-10	-3.59715	down							Seita.3G199300	2.77042e-10	-2.30754	down		Seita.2G201600	0.00167011	-1.295	down
Seita.3G139000	0.00509641	3.53373	up		Seita.5G113700	0.0117692	1.87943	up		Seita.4G045800	0.0326244	1.83786	up		Seita.2G234300	1.59618e-31	-5.99298	down		Seita.7G079300	0.00127305	-2.33131	down		Seita.3G084000	0.00533366	1.07055	up		Seita.2G390900	2.97278e-12	1.55009	up							Seita.3G199700	0.0165939	-1.36953	down		Seita.2G202100	0.00262533	1.09903	up
Seita.3G139100	0.0181901	1.17232	up		Seita.5G116400	0.0094255	-2.18227	down		Seita.4G046000	0.0463409	-1.45886	down		Seita.2G234400	2.54237e-35	-7.13653	down		Seita.7G081200	0.00101026	-2.30846	down		Seita.3G084600	0.00709834	1.56584	up		Seita.2G391600	1.99939e-09	-1.52025	down							Seita.3G201400	0.0276819	-1.68161	down		Seita.2G203000	0.00533134	-1.20358	down
Seita.3G139400	0.000171619	-2.39049	down		Seita.5G117400	0.0141123	-1.84792	down		Seita.4G048300	0.043836	3.14216	up		Seita.2G234500	4.67101e-25	-5.38015	down		Seita.7G084400	0.037624	-1.38427	down		Seita.3G085200	0.0442396	1.00926	up		Seita.2G392400	2.4156e-15	1.75225	up							Seita.3G202500	3.23201e-06	-1.16182	down		Seita.2G203100	1.825e-05	-2.55896	down
Seita.3G140400	0.014886	3.26119	up		Seita.5G118600	0.0389483	-1.62383	down		Seita.4G052700	0.0286331	-1.11385	down		Seita.2G234700	9.12047e-15	-4.63664	down		Seita.7G087700	1.9286e-05	2.77972	up		Seita.3G085500	9.96251e-15	-1.67005	down		Seita.2G392500	1.1849e-06	-1.11514	down							Seita.3G204900	1.16396e-05	-8.75212	down		Seita.2G204900	0.00182317	1.01425	up
Seita.3G140700	0.00200407	1.42405	up		Seita.5G118700	0.000470211	-4.11306	down		Seita.4G053500	3.88448e-09	2.42102	up		Seita.2G234800	1.93882e-25	-6.29774	down		Seita.7G088700	0.0166287	1.61319	up		Seita.3G087100	2.43083e-05	1.03342	up		Seita.2G392800	5.29196e-10	-8.3457	down							Seita.3G206500	1.69687e-37	7.09066	up		Seita.2G205400	0.000475406	-2.01357	down
Seita.3G141400	0.0123205	1.20744	up		Seita.5G118800	9.72024e-05	-3.16942	down		Seita.4G058500	0.00740601	-2.87363	down		Seita.2G235000	0.0137229	-1.2796	down		Seita.7G090100	0.0381257	-2.03357	down		Seita.3G087800	1.79954e-10	-3.58016	down		Seita.2G394300	0.000110304	-1.85007	down							Seita.3G206700	0.0192807	1.94131	up		Seita.2G205700	0.000487519	-1.44276	down
Seita.3G142400	0.000171619	3.54791	up		Seita.5G119800	0.00651792	4.10712	up		Seita.4G060600	6.28165e-05	4.78376	up		Seita.2G235500	0.00564546	-1.62491	down		Seita.7G093400	0.0106848	9.78325	up		Seita.3G090400	0.000832797	-1.17541	down		Seita.2G395000	8.0352e-05	1.31968	up							Seita.3G209800	2.23571e-66	4.51992	up		Seita.2G206200	1.22312e-08	1.80733	up
Seita.3G142500	0.0132446	-1.62389	down		Seita.5G120300	0.0326931	-1.61954	down		Seita.4G061100	0.0160139	-1.07941	down		Seita.2G236200	5.42603e-19	-2.21242	down		Seita.7G093900	0.000187482	-2.49252	down		Seita.3G091100	0.00249819	-1.34489	down		Seita.2G395400	0.019805	-1.89323	down							Seita.3G210000	5.15088e-07	-1.26345	down		Seita.2G206800	0.0116137	1.42981	up
Seita.3G144400	0.00545467	-1.42949	down		Seita.5G121000	0.031246	-3.11384	down		Seita.4G063900	0.0488955	2.43548	up		Seita.2G237100	4.1989e-05	1.4603	up		Seita.7G095400	0.0137594	-3.81889	down		Seita.3G093400	9.7894e-16	-3.05529	down		Seita.2G395600	3.90994e-11	1.45694	up							Seita.3G212000	7.96046e-19	2.75826	up		Seita.2G207600	0.00186194	1.30852	up
Seita.3G145200	7.52182e-10	-3.12287	down		Seita.5G123000	0.0183506	-2.36993	down		Seita.4G065500	0.000274046	-1.54115	down		Seita.2G237400	1.49228e-12	3.74381	up		Seita.7G095500	0.00497621	-2.28029	down		Seita.3G093500	3.51646e-44	2.91778	up		Seita.2G396200	6.03514e-08	-1.48706	down							Seita.3G213600	3.87306e-06	1.21004	up		Seita.2G207800	0.0135305	-1.46939	down
Seita.3G146800	0.0163196	-1.50398	down		Seita.5G123900	0.00531756	-3.81276	down		Seita.4G068600	5.1365e-07	-2.07164	down		Seita.2G238400	2.50378e-24	-2.12725	down		Seita.7G097100	4.91536e-05	2.87708	up		Seita.3G094000	3.46113e-06	1.83812	up		Seita.2G397500	0.000937457	-1.63853	down							Seita.3G215600	0.000151922	1.91947	up		Seita.2G207900	0.00145085	1.72253	up
Seita.3G147000	0.0345012	1.05239	up		Seita.5G124200	0.0424137	2.79784	up		Seita.4G075600	0.00013121	-1.67333	down		Seita.2G238900	2.20835e-11	-3.1722	down		Seita.7G097200	0.00748237	2.11995	up		Seita.3G095700	3.51149e-07	1.0524	up		Seita.2G399100	0.000230921	-1.40576	down							Seita.3G216400	4.3158e-20	-2.31979	down		Seita.2G209000	0.0136943	2.70034	up
Seita.3G147200	0.0433784	-1.05874	down		Seita.5G126500	0.00989507	-2.13875	down		Seita.4G076000	5.92319e-08	-2.58954	down		Seita.2G239500	1.52265e-05	-1.03908	down		Seita.7G099300	0.0102673	1.53539	up		Seita.3G096700	2.07353e-06	-2.30906	down		Seita.2G399700	4.27275e-16	3.69885	up							Seita.3G216900	4.40673e-43	3.76205	up		Seita.2G209100	0.0361995	1.50394	up
Seita.3G147300	1.81788e-12	-Inf	down		Seita.5G127000	0.0412699	1.5332	up		Seita.4G078600	0.0281795	1.34942	up		Seita.2G239700	1.64233e-06	1.10905	up		Seita.7G099400	0.00294686	-4.08682	down		Seita.3G096800	3.6346e-36	-4.10076	down		Seita.2G400500	0.000359604	-1.70318	down							Seita.3G217400	0.000820093	-2.57635	down		Seita.2G209200	0.000179775	-1.16186	down
Seita.3G148700	3.15269e-10	2.81672	up		Seita.5G128200	0.0273138	2.92839	up		Seita.4G079000	0.000119148	1.71369	up		Seita.2G240100	1.03777e-08	-Inf	down		Seita.7G100500	3.69306e-05	-3.40138	down		Seita.3G097400	7.95439e-26	-2.18698	down		Seita.2G400600	0.00137234	-2.16213	down							Seita.3G217800	6.59984e-06	2.1184	up		Seita.2G209900	1.70145e-24	-2.86111	down
Seita.3G151000	0.000862762	1.56416	up		Seita.5G129700	0.0350218	-1.63594	down		Seita.4G079200	0.0082208	1.71013	up		Seita.2G240600	2.699e-29	-5.64801	down		Seita.7G100800	0.0246549	-2.56012	down		Seita.3G097600	1.33969e-06	-1.03419	down		Seita.2G400700	7.78164e-11	-2.24461	down							Seita.3G218000	0.0190217	2.31285	up		Seita.2G211000	0.00064733	1.70664	up
Seita.3G153400	0.0027814	-3.22196	down		Seita.5G131300	0.0175624	1.81976	up		Seita.4G082000	0.000133822	1.77285	up		Seita.2G244000	2.8588e-09	-3.65961	down		Seita.7G101100	0.00811266	2.69437	up		Seita.3G099000	2.03011e-30	-4.46987	down		Seita.2G401000	3.51805e-06	4.01785	up							Seita.3G218600	0.00377671	1.10126	up		Seita.2G211600	0.00977883	1.82066	up
Seita.3G153600	0.040904	-1.6057	down		Seita.5G131500	0.0437536	1.54962	up		Seita.4G083300	0.00175873	-3.01591	down		Seita.2G244300	1.5346e-05	2.13867	up		Seita.7G102200	0.0107442	1.50982	up		Seita.3G099500	0.0460885	1.01059	up		Seita.2G401100	3.32678e-11	2.04584	up							Seita.3G218800	0.0160363	1.91271	up		Seita.2G212400	1.97401e-08	-2.03515	down
Seita.3G154700	6.19469e-11	-3.02508	down		Seita.5G134300	0.0244833	2.12917	up		Seita.4G084300	0.00303179	-1.27899	down		Seita.2G246400	1.68813e-16	-7.09395	down		Seita.7G102900	5.16839e-05	2.62776	up		Seita.3G101300	9.89237e-07	2.49834	up		Seita.2G401300	2.60165e-15	1.80631	up							Seita.3G218900	2.16994e-12	3.52215	up		Seita.2G212500	2.53709e-13	-2.89994	down
Seita.3G155200	0.00905829	-3.23012	down		Seita.5G134500	0.00691225	1.9632	up		Seita.4G085500	0.000413771	2.75472	up		Seita.2G246500	2.62748e-05	-1.97467	down		Seita.7G107500	0.0258685	2.61657	up		Seita.3G102200	5.31392e-24	2.29	up		Seita.2G401400	2.33758e-15	-1.96817	down							Seita.3G219800	4.9557e-06	-1.1695	down		Seita.2G212900	2.84763e-26	-4.13714	down
Seita.3G157400	6.55079e-13	4.64928	up		Seita.5G135000	0.0366945	3.54397	up		Seita.4G088600	1.28799e-15	5.11285	up		Seita.2G247300	0.0153992	-1.38104	down		Seita.7G115400	0.00107837	-2.11782	down		Seita.3G102500	3.79677e-08	-1.53167	down		Seita.2G402000	1.20929e-15	-1.80342	down							Seita.3G220000	0.0355973	1.33714	up		Seita.2G213000	8.04505e-12	-Inf	down
Seita.3G158000	0.00618557	-2.57682	down		Seita.5G137400	0.0256884	3.93495	up		Seita.4G091100	0.00694973	-1.20561	down		Seita.2G247400	0.00602199	-1.24282	down		Seita.7G118000	0.0468904	1.48726	up		Seita.3G103200	3.4383e-07	-1.68668	down		Seita.2G402400	1.05619e-09	1.75044	up							Seita.3G220200	0.000266197	-1.3249	down		Seita.2G213800	3.7529e-21	-2.51578	down
Seita.3G158200	0.036696	-1.07294	down		Seita.5G138100	0.00393635	-2.78538	down		Seita.4G091200	3.16649e-07	-2.12683	down		Seita.2G248600	0.0375709	3.61787	up		Seita.7G120200	0.00184234	-2.71678	down		Seita.3G103400	7.10811e-06	-1.40357	down		Seita.2G402800	8.07062e-12	1.58164	up							Seita.3G220500	1.34715e-09	1.47202	up		Seita.2G214100	4.84201e-05	-1.08958	down
Seita.3G158300	5.17029e-05	-2.51659	down		Seita.5G139200	0.00100296	-2.49465	down		Seita.4G091400	8.09907e-09	-2.38054	down		Seita.2G248900	0.008253	-1.64864	down		Seita.7G121100	0.00598117	-2.91036	down		Seita.3G103800	1.72438e-06	-1.26287	down		Seita.2G403800	0.000146286	2.00782	up							Seita.3G221300	0.00120492	-1.73291	down		Seita.2G214700	0.000426562	1.16848	up
Seita.3G159900	6.01038e-05	-4.36026	down		Seita.5G142600	0.0283453	-1.84134	down		Seita.4G091500	0.00117951	-2.84487	down		Seita.2G249300	3.95652e-22	8.21479	up		Seita.7G121700	6.6884e-06	5.52925	up		Seita.3G104600	5.91856e-08	-1.91465	down		Seita.2G403900	2.61449e-05	1.68739	up							Seita.3G221400	1.37576e-07	-1.45766	down		Seita.2G216500	5.73881e-09	1.81827	up
Seita.3G161200	1.27617e-05	-2.17951	down		Seita.5G145000	0.0175698	1.84219	up		Seita.4G092600	0.00821332	-2.60483	down		Seita.2G249500	3.66007e-14	-3.07766	down		Seita.7G124900	0.0338345	-2.51776	down		Seita.3G105100	1.8451e-05	2.27821	up		Seita.2G404100	0.000528687	-1.29566	down							Seita.3G221500	7.2714e-07	1.75479	up		Seita.2G217200	0.0159304	-2.49437	down
Seita.3G161500	0.00434906	1.40037	up		Seita.5G146500	0.0003677	-2.51822	down		Seita.4G096400	0.0122966	2.08414	up		Seita.2G250200	9.08799e-21	-2.01504	down		Seita.7G126300	0.00168357	3.27943	up		Seita.3G105500	2.08926e-37	-3.58165	down		Seita.2G404500	2.61451e-17	2.6977	up							Seita.3G222200	2.72761e-06	-1.48058	down		Seita.2G217400	0.0478086	-1.23155	down
Seita.3G162000	2.25987e-08	-3.34395	down		Seita.5G146800	0.00962254	-5.95623	down		Seita.4G099200	7.90694e-21	3.89695	up		Seita.2G250300	6.1051e-24	-2.57344	down		Seita.7G128200	0.0108363	-1.6551	down		Seita.3G105800	2.63731e-06	-1.00857	down		Seita.2G405200	0.00333914	-1.319	down							Seita.3G222300	1.03883e-13	-2.16107	down		Seita.2G217500	5.93443e-06	-2.50622	down
Seita.3G162200	0.0293778	-1.09644	down		Seita.5G147800	0.000222519	3.39625	up		Seita.4G099300	0.0357807	1.14508	up		Seita.2G251500	4.72235e-16	-2.14005	down		Seita.7G129100	0.014957	-2.2618	down		Seita.3G105900	0.00409023	1.08326	up		Seita.2G406500	3.78032e-07	3.08817	up							Seita.3G223200	8.99644e-07	-1.49954	down		Seita.2G217600	0.0101686	1.56811	up
Seita.3G162400	0.000725127	3.33942	up		Seita.5G151100	0.0490962	-1.54493	down		Seita.4G099400	1.9337e-06	3.64015	up		Seita.2G251700	2.76932e-10	-1.4496	down		Seita.7G132000	0.00232377	Inf	up		Seita.3G108900	2.26573e-09	1.39901	up		Seita.2G407200	0.000549468	-1.78311	down							Seita.3G223900	0.0123032	1.23693	up		Seita.2G217900	1.06564e-05	-1.20259	down
Seita.3G163200	0.00255882	-1.42603	down		Seita.5G152000	0.0276701	-2.68876	down		Seita.4G101200	0.0262361	1.19523	up		Seita.2G251900	0.0288685	1.10662	up		Seita.7G132300	0.000511709	2.14874	up		Seita.3G109100	5.37584e-20	2.04707	up		Seita.2G407300	0.0116775	-1.86168	down							Seita.3G224500	9.38388e-10	-2.44548	down		Seita.2G218000	0.00987358	1.11467	up
Seita.3G164900	0.0116632	-1.30889	down		Seita.5G153300	0.000623421	-2.56731	down		Seita.4G101900	0.000213082	-2.62347	down		Seita.2G253500	1.15621e-05	-1.77541	down		Seita.7G132700	6.58161e-13	3.84643	up		Seita.3G109200	8.43577e-11	-3.27067	down		Seita.2G409400	4.84587e-10	-2.18846	down							Seita.3G225200	6.59984e-06	-1.18004	down		Seita.2G218700	2.83942e-56	4.58676	up
Seita.3G165100	0.000456014	1.61521	up		Seita.5G154300	0.0151376	-2.32423	down		Seita.4G102100	0.0143605	1.36604	up		Seita.2G254100	3.59158e-06	-1.03195	down		Seita.7G133000	0.0408608	-1.36625	down		Seita.3G109300	0.00648724	1.76343	up		Seita.2G410600	6.288e-11	-2.35523	down							Seita.3G227500	0.000168331	-1.03601	down		Seita.2G218800	0.00056801	1.47052	up
Seita.3G165200	7.34248e-11	-4.24434	down		Seita.5G157900	1.73122e-08	-5.58498	down		Seita.4G102400	8.71752e-05	-3.4151	down		Seita.2G254900	0.00731433	-1.89345	down		Seita.7G133600	0.000588494	-2.69685	down		Seita.3G110100	1.99989e-13	1.49534	up		Seita.2G411000	3.12119e-08	-1.88197	down							Seita.3G227600	1.31257e-07	-1.3762	down		Seita.2G219000	0.000260453	1.05108	up
Seita.3G165800	0.00289045	-1.93643	down		Seita.5G164100	3.20251e-05	-3.23986	down		Seita.4G104100	0.00457459	2.85214	up		Seita.2G255600	3.4641e-06	1.20951	up		Seita.7G134000	0.000667434	-2.81899	down		Seita.3G110200	1.32433e-67	4.33134	up		Seita.2G412200	1.70376e-06	-1.38025	down							Seita.3G228900	0.000134917	-6.3772	down		Seita.2G219700	0.0154367	-2.4179	down
Seita.3G168200	0.000587778	-2.33134	down		Seita.5G166200	0.025525	3.81473	up		Seita.4G104700	0.0378084	-1.28242	down		Seita.2G255700	0.000117603	-2.16917	down		Seita.7G134400	0.000247272	-4.51076	down		Seita.3G110700	0.000285678	-2.72876	down		Seita.2G414100	4.76581e-11	3.26008	up							Seita.3G229000	3.96801e-07	-4.09582	down		Seita.2G220500	0.00274024	-1.78308	down
Seita.3G168400	1.90367e-07	-4.16892	down		Seita.5G166300	0.000602093	3.22025	up		Seita.4G106900	0.0190058	-3.56219	down		Seita.2G256100	2.346e-05	-1.35297	down		Seita.7G137100	0.00184709	-2.03519	down		Seita.3G111000	0.0262273	1.08024	up		Seita.2G414200	1.75735e-16	-2.73621	down							Seita.3G230200	4.56596e-07	1.80804	up		Seita.2G221800	3.09877e-21	-3.25045	down
Seita.3G168900	8.1505e-05	-2.10488	down		Seita.5G166400	0.0320952	-2.51241	down		Seita.4G108300	0.00024047	1.98455	up		Seita.2G256200	0.00797594	-1.05121	down		Seita.7G140500	0.029395	1.64324	up		Seita.3G111200	5.27367e-06	-2.2007	down		Seita.2G415500	0.00273906	-1.0069	down							Seita.3G230400	3.62488e-06	1.21591	up		Seita.2G221900	0.0193949	-1.71853	down
Seita.3G169200	6.04164e-09	-4.92853	down		Seita.5G168800	0.0240195	-2.6982	down		Seita.4G108700	1.04327e-06	-2.94999	down		Seita.2G256400	1.42827e-24	-4.73778	down		Seita.7G141000	0.0262745	4.66697	up		Seita.3G111800	2.97089e-07	1.07849	up		Seita.2G415800	4.14903e-05	-1.20492	down							Seita.3G231300	9.6954e-08	-1.31409	down		Seita.2G222400	4.76278e-06	-2.77797	down
Seita.3G170100	0.00797269	-1.39839	down		Seita.5G173500	0.04759	2.02978	up		Seita.4G110300	0.000326842	-1.75048	down		Seita.2G256700	1.82175e-73	-5.09904	down		Seita.7G144300	0.0163068	-2.88883	down		Seita.3G112000	0.000516775	-1.76818	down		Seita.2G418000	0.00193068	-1.27733	down							Seita.3G232700	1.76525e-07	-1.32227	down		Seita.2G222800	9.14311e-16	-2.64639	down
Seita.3G170300	0.0359891	1.46161	up		Seita.5G178400	0.039636	1.79427	up		Seita.4G111700	0.00876113	-1.29013	down		Seita.2G256800	7.87185e-24	-3.92598	down		Seita.7G144600	0.000785815	-5.13433	down		Seita.3G112700	3.75242e-16	-2.69406	down		Seita.2G420900	7.77663e-09	1.35973	up							Seita.3G233500	7.63157e-07	-2.00021	down		Seita.2G223700	2.5991e-28	-2.99196	down
Seita.3G170400	1.24605e-07	-4.11192	down		Seita.5G180100	0.000203295	-5.74491	down		Seita.4G112500	1.14298e-07	-2.05484	down		Seita.2G257000	1.58312e-16	3.05818	up		Seita.7G149600	0.0188594	1.6007	up		Seita.3G112800	0.000272764	-1.11078	down		Seita.2G421600	0.00446888	1.54423	up							Seita.3G235400	2.66838e-06	-2.30819	down		Seita.2G223900	3.4128e-05	-1.11689	down
Seita.3G171400	0.0195362	-1.28721	down		Seita.5G180900	0.001946	-2.84873	down		Seita.4G114000	0.0323723	-1.31825	down		Seita.2G258900	3.14696e-29	3.54525	up		Seita.7G149800	0.00364394	1.98013	up		Seita.3G114000	2.01044e-16	-2.85207	down		Seita.2G422100	1.01698e-07	1.37272	up							Seita.3G236600	0.0384752	-1.34615	down		Seita.2G224000	0.00118015	-1.2179	down
Seita.3G171800	0.00205279	2.36155	up		Seita.5G184000	0.0041121	-3.17618	down		Seita.4G114600	0.000108436	1.59187	up		Seita.2G260500	1.75285e-23	-2.41624	down		Seita.7G149900	0.00106621	-2.17594	down		Seita.3G116400	0.00342063	1.17545	up		Seita.2G422200	0.000100289	1.52815	up							Seita.3G237500	0.036422	-1.11167	down		Seita.2G224300	1.59364e-09	-1.71392	down
Seita.3G172500	1.68149e-19	-7.50914	down		Seita.5G184100	5.53154e-05	-2.73289	down		Seita.4G116300	5.33087e-10	6.08604	up		Seita.2G262000	0.000638957	-1.96893	down		Seita.7G153200	0.00135897	-2.89185	down		Seita.3G119200	2.42386e-07	-1.06637	down		Seita.2G422300	0.00220221	-1.11769	down							Seita.3G238600	1.67599e-07	-1.28066	down		Seita.2G224400	0.0116982	-1.10334	down
Seita.3G172700	1.18457e-05	-9.27721	down		Seita.5G185100	0.000115104	-4.01164	down		Seita.4G117700	0.000172778	-1.79657	down		Seita.2G263300	5.89672e-05	-2.10052	down		Seita.7G158900	0.0321412	-3.90271	down		Seita.3G119400	8.44407e-10	1.42055	up		Seita.2G422400	1.23227e-14	-1.95306	down							Seita.3G240500	0.0491772	-1.10275	down		Seita.2G224500	1.15009e-05	-2.27184	down
Seita.3G172800	0.00672147	-3.61608	down		Seita.5G191600	0.0351668	-1.63321	down		Seita.4G119400	0.00722577	1.34752	up		Seita.2G264300	8.5604e-13	-2.12306	down		Seita.7G160900	0.0366367	-2.52207	down		Seita.3G120200	7.34085e-36	3.1482	up		Seita.2G422600	2.28456e-08	-2.17606	down							Seita.3G241400	0.000138492	1.19875	up		Seita.2G224800	0.000207893	-1.55033	down
Seita.3G174700	0.0035852	-1.69947	down		Seita.5G193100	0.0338414	-2.49681	down		Seita.4G120200	0.0128247	1.99662	up		Seita.2G264800	0.000249595	-1.90726	down		Seita.7G161900	0.0489133	-2.3184	down		Seita.3G121200	0.0361876	1.53148	up		Seita.2G422800	2.71347e-16	2.17996	up							Seita.3G243700	6.80188e-11	4.14483	up		Seita.2G225400	2.2304e-06	1.45009	up
Seita.3G176300	0.00160935	2.54868	up		Seita.5G194500	0.000371646	2.92719	up		Seita.4G122200	0.0321828	-1.38647	down		Seita.2G265200	1.55582e-06	-3.84818	down		Seita.7G163500	0.0149373	-3.8995	down		Seita.3G121700	4.84805e-07	-1.588	down		Seita.2G423200	9.50713e-06	-3.07681	down							Seita.3G248300	5.06597e-06	-1.12705	down		Seita.2G225500	1.93644e-09	2.43786	up
Seita.3G176600	0.0092402	1.29418	up		Seita.5G195700	0.0333005	-5.02039	down		Seita.4G122500	0.0273371	1.82765	up		Seita.2G266300	0.000226002	2.13329	up		Seita.7G166400	0.00417644	1.88781	up		Seita.3G122800	7.66797e-17	-1.80283	down		Seita.2G424900	3.2118e-06	1.17957	up							Seita.3G248500	6.13641e-11	-1.61689	down		Seita.2G226400	9.17379e-30	-3.14351	down
Seita.3G176700	0.000142075	-2.88544	down		Seita.5G198500	0.000161187	-4.07321	down		Seita.4G128800	2.10231e-06	-1.94364	down		Seita.2G268500	7.40854e-38	-2.89848	down		Seita.7G166800	0.04103	-3.91723	down		Seita.3G123300	1.15346e-21	-1.9521	down		Seita.2G425800	0.0301445	-1.25604	down							Seita.3G249600	5.99785e-07	-1.25349	down		Seita.2G226800	2.30863e-09	-1.62952	down
Seita.3G176800	1.4871e-06	-3.16889	down		Seita.5G200000	0.0204373	2.41731	up		Seita.4G132600	2.34465e-06	-5.135	down		Seita.2G269000	1.91368e-06	-1.54871	down		Seita.7G167200	0.00170429	-1.78896	down		Seita.3G123800	2.44997e-09	2.36653	up		Seita.2G426000	0.0121231	1.13594	up							Seita.3G251200	2.94262e-10	-2.42282	down		Seita.2G228300	0.00100762	-2.75422	down
Seita.3G177700	0.0171005	-1.26245	down		Seita.5G201500	9.02242e-05	2.72629	up		Seita.4G135100	0.00722577	-4.42578	down		Seita.2G269700	1.42588e-06	-1.24492	down		Seita.7G167900	0.0154906	1.55636	up		Seita.3G124200	6.01827e-11	-4.10961	down		Seita.2G426700	0.00162063	1.06535	up							Seita.3G255700	4.29345e-05	-2.64566	down		Seita.2G228400	0.0147962	-1.1983	down
Seita.3G179200	0.040904	-1.29831	down		Seita.5G201900	0.00099467	-2.95352	down		Seita.4G137800	0.00550425	-2.14295	down		Seita.2G269800	2.46157e-55	-4.668	down		Seita.7G170200	0.00775734	3.47979	up		Seita.3G124300	1.94199e-12	-1.45172	down		Seita.2G426900	0.0495114	1.09687	up							Seita.3G262000	0.0113961	-1.12869	down		Seita.2G229100	0.000348238	-2.02498	down
Seita.3G182400	3.82863e-06	3.16712	up		Seita.5G206800	0.0323733	-2.25687	down		Seita.4G137900	0.00368399	-3.21233	down		Seita.2G269900	1.35347e-11	-3.66443	down		Seita.7G171000	0.0120858	3.00564	up		Seita.3G126900	1.35684e-28	2.4703	up		Seita.2G427100	6.6423e-08	-1.24521	down							Seita.3G263800	2.02236e-56	-6.08821	down		Seita.2G229500	4.62073e-12	1.82611	up
Seita.3G182500	0.0189638	-1.20567	down		Seita.5G211800	0.040247	3.30652	up		Seita.4G138500	4.37393e-06	3.50642	up		Seita.2G270000	7.34775e-17	-2.89305	down		Seita.7G173800	3.89685e-09	3.07786	up		Seita.3G128300	1.31509e-10	1.31322	up		Seita.2G427700	1.98865e-26	4.23669	up							Seita.3G264300	3.86911e-15	2.92759	up		Seita.2G229900	3.64056e-05	2.17725	up
Seita.3G185100	0.0162439	-1.3537	down		Seita.5G214300	0.0055634	2.30713	up		Seita.4G139900	0.0154577	-1.55906	down		Seita.2G271100	8.01234e-10	-2.75713	down		Seita.7G175200	0.00995123	1.72398	up		Seita.3G128500	0.0240761	-1.28243	down		Seita.2G429200	6.58907e-20	-2.11212	down							Seita.3G269500	3.34714e-09	-2.45198	down		Seita.2G230800	8.70433e-20	-3.4428	down
Seita.3G185300	0.00199477	2.27159	up		Seita.5G216800	0.00191337	-2.22207	down		Seita.4G140300	0.00251459	5.57092	up		Seita.2G272000	0.00176804	1.67901	up		Seita.7G178900	0.00770033	1.67016	up		Seita.3G128900	9.60993e-07	-1.45202	down		Seita.2G429300	6.77648e-05	-1.35952	down							Seita.3G269600	5.78566e-20	-3.34266	down		Seita.2G231100	0.000502886	1.06157	up
Seita.3G185500	0.000246656	-1.74265	down		Seita.5G219300	5.84316e-07	3.57301	up		Seita.4G141400	0.0137207	1.07237	up		Seita.2G273900	3.39907e-11	-2.60598	down		Seita.7G182800	0.00170331	-4.25704	down		Seita.3G130700	0.0089939	1.19713	up		Seita.2G429600	0.0202704	1.01674	up							Seita.3G271300	2.74089e-06	-2.09095	down		Seita.2G231200	0.000732187	-1.95557	down
[truncated: 4,979 more rows]
[truncated: 8 more columns]
