# Supplementary material for: Response of Multiple Tissues to Drought Revealed by a Weighted Gene Co-Expression Network Analysis in Foxtail Millet [Setaria italica (L.) P. Beauv.]
Source: Front Plant Sci. 2022 Jan 12;12:746166. doi: 10.3389/fpls.2021.746166 (PMC8790073; doi:10.3389/fpls.2021.746166)
Supplement: Supplementary Table S4 — A list of KEGG categories of DEGs identified in this trial. [file Table_4.XLSX]

## Sheet: Supplementary Table S4
Supplementary Table S4: List of KEGG categories of DEGs identified in this trial
Root											Stem											Leaf
Cluster	KEGG_ID	Description	GeneRatio	BgRatio	pvalue	p.adjust	qvalue	geneID	Count		Cluster	KEGG_ID	Description	GeneRatio	BgRatio	pvalue	p.adjust	qvalue	geneID	Count		Cluster	KEGG_ID	Description	GeneRatio	BgRatio	pvalue	p.adjust	qvalue	geneID	Count
Ci134DEG	sita00940	Phenylpropanoid biosynthesis	73/611	282/5494	7.70161e-13	8.39475e-11	7.05305e-11	Seita.1G022400/Seita.1G079000/Seita.1G170300/Seita.1G240400/Seita.1G240600/Seita.1G281400/Seita.2G147600/Seita.2G254000/Seita.2G320200/Seita.2G371600/Seita.2G406500/Seita.2G406600/Seita.2G407100/Seita.2G407300/Seita.2G407600/Seita.2G430900/Seita.2G431500/Seita.2G431600/Seita.3G004800/Seita.3G022600/Seita.3G052900/Seita.3G053000/Seita.3G190400/Seita.3G234900/Seita.3G235000/Seita.3G270300/Seita.3G3…	73		Ci134DEG	sita00940	Phenylpropanoid biosynthesis	35/377	282/5494	0.000372875	0.0361689	0.033755	Seita.1G023000/Seita.1G023100/Seita.1G079000/Seita.1G230100/Seita.2G254100/Seita.2G371600/Seita.2G431500/Seita.3G053000/Seita.3G194300/Seita.3G270400/Seita.3G271500/Seita.3G347500/Seita.4G176800/Seita.4G191500/Seita.4G259700/Seita.5G053000/Seita.5G356600/Seita.5G361200/Seita.5G463200/Seita.6G055900/Seita.6G093400/Seita.6G224300/Seita.7G155700/Seita.8G015200/Seita.8G100100/Seita.9G091600/Seita.9G2…	35		Ci134DEG	sita00500	Starch and sucrose metabolism	42/488	180/5494	2.50354e-09	2.57864e-07	2.21365e-07	Seita.1G323700/Seita.2G168000/Seita.2G188200/Seita.2G235900/Seita.2G270400/Seita.2G342700/Seita.2G342900/Seita.2G343000/Seita.2G396200/Seita.2G422000/Seita.3G109600/Seita.3G176900/Seita.3G270200/Seita.4G065500/Seita.4G101200/Seita.4G191200/Seita.5G056800/Seita.5G134800/Seita.5G237300/Seita.5G334800/Seita.5G384100/Seita.5G414600/Seita.5G429100/Seita.6G090000/Seita.6G120500/Seita.6G141700/Seita.7G1…	42
Ci134DEG	sita00500	Starch and sucrose metabolism	44/611	180/5494	2.22443e-07	1.21231e-05	1.01855e-05	Seita.1G112800/Seita.1G323700/Seita.1G339700/Seita.1G378600/Seita.2G168000/Seita.2G237100/Seita.2G254000/Seita.2G315900/Seita.2G396200/Seita.3G017300/Seita.3G059500/Seita.3G133300/Seita.4G041500/Seita.4G099700/Seita.4G101200/Seita.4G114200/Seita.4G139700/Seita.4G255800/Seita.4G288800/Seita.5G019600/Seita.5G022400/Seita.5G134800/Seita.5G313600/Seita.5G334800/Seita.5G356800/Seita.5G429100/Seita.6G0…	44		Ci603DEG	sita03010	Ribosome	68/456	334/5494	6.2233e-13	6.2233e-11	5.69923e-11	Seita.1G003100/Seita.1G028300/Seita.1G073500/Seita.1G119400/Seita.1G160500/Seita.1G205300/Seita.1G214900/Seita.2G048400/Seita.2G134200/Seita.2G181800/Seita.2G183600/Seita.2G262800/Seita.2G262900/Seita.2G267400/Seita.2G317300/Seita.2G318300/Seita.2G319400/Seita.2G362700/Seita.2G387500/Seita.2G394600/Seita.2G429500/Seita.3G036600/Seita.3G162800/Seita.3G280800/Seita.3G330100/Seita.4G005200/Seita.4G0…	68		Ci134DEG	sita00196	Photosynthesis - antenna proteins	10/488	16/5494	1.37178e-07	7.06464e-06	6.06469e-06	Seita.2G351600/Seita.2G352900/Seita.2G366600/Seita.3G143800/Seita.4G139900/Seita.5G215600/Seita.6G158500/Seita.7G121800/Seita.8G080900/Seita.9G177100	10
Ci134DEG	sita00480	Glutathione metabolism	36/611	141/5494	9.49672e-07	3.45048e-05	2.899e-05	Seita.1G166500/Seita.1G192100/Seita.2G033200/Seita.2G033500/Seita.2G406500/Seita.2G444500/Seita.3G038400/Seita.3G038600/Seita.3G038700/Seita.4G232000/Seita.4G241000/Seita.5G047800/Seita.5G104100/Seita.5G452900/Seita.5G453400/Seita.5G453500/Seita.7G023900/Seita.7G225300/Seita.8G008300/Seita.8G040400/Seita.9G064400/Seita.9G157600/Seita.9G262500/Seita.9G338500/Seita.9G345600/Seita.9G345700/Seita.9G3…	36		Ci603DEG	sita00196	Photosynthesis - antenna proteins	12/456	16/5494	1.24708e-10	6.23538e-09	5.7103e-09	Seita.2G217800/Seita.2G299200/Seita.2G351600/Seita.2G352900/Seita.2G366600/Seita.3G143800/Seita.4G139900/Seita.5G215600/Seita.6G158500/Seita.7G121800/Seita.8G080900/Seita.9G177100	12		Ci134DEG	sita04075	Plant hormone signal transduction	45/488	267/5494	1.43525e-05	0.000492768	0.00042302	Seita.1G013900/Seita.1G075600/Seita.1G356800/Seita.2G024600/Seita.2G029600/Seita.2G058900/Seita.2G142900/Seita.2G177500/Seita.2G367800/Seita.2G375300/Seita.2G437500/Seita.3G003200/Seita.3G019000/Seita.3G104000/Seita.3G139000/Seita.3G164700/Seita.3G173700/Seita.3G218800/Seita.3G223500/Seita.4G026700/Seita.4G060600/Seita.4G082000/Seita.4G226200/Seita.5G018300/Seita.5G126200/Seita.5G312700/Seita.5G3…	45
Ci134DEG	sita00904	Diterpenoid biosynthesis	13/611	35/5494	5.06061e-05	0.00137902	0.00115861	Seita.2G144900/Seita.2G145800/Seita.2G145900/Seita.4G235500/Seita.4G235600/Seita.5G157700/Seita.5G323400/Seita.5G404900/Seita.6G023100/Seita.6G100500/Seita.6G101900/Seita.8G166500/Seita.9G004400	13		Ci603DEG	sita04016	MAPK signaling pathway - plant	30/456	167/5494	3.52836e-05	0.00117612	0.00107708	Seita.1G030500/Seita.1G144700/Seita.2G138400/Seita.2G177500/Seita.2G319600/Seita.3G139000/Seita.3G160800/Seita.3G164700/Seita.3G207900/Seita.3G218800/Seita.4G086700/Seita.4G185100/Seita.4G251700/Seita.5G233100/Seita.5G257700/Seita.5G354700/Seita.5G379400/Seita.6G005300/Seita.7G021400/Seita.7G121700/Seita.7G194000/Seita.7G239900/Seita.9G311900/Seita.9G318200/Seita.9G319200/Seita.9G379000/Seita.9G4…	30		Ci134DEG	sita00195	Photosynthesis	21/488	90/5494	2.72223e-05	0.000700975	0.000601757	Seita.1G217200/Seita.2G031300/Seita.2G117000/Seita.2G248100/Seita.2G330500/Seita.2G356500/Seita.3G184900/Seita.4G000900/Seita.4G207000/Seita.5G172700/Seita.5G336700/Seita.5G390200/Seita.5G446500/Seita.6G005700/Seita.6G032200/Seita.6G082000/Seita.7G090300/Seita.7G092700/Seita.7G279400/Seita.9G069300/Seita.J002400	21
Ci134DEG	sita00010	Glycolysis / Gluconeogenesis	35/611	165/5494	0.000101573	0.00221428	0.00186038	Seita.1G004400/Seita.1G221800/Seita.1G307000/Seita.1G314800/Seita.3G111200/Seita.3G209500/Seita.3G247900/Seita.4G093100/Seita.4G108300/Seita.4G267900/Seita.4G268700/Seita.5G113700/Seita.5G134800/Seita.5G313600/Seita.5G377300/Seita.5G380500/Seita.7G122900/Seita.7G123000/Seita.7G226400/Seita.7G283900/Seita.7G315000/Seita.7G315100/Seita.8G024300/Seita.8G050800/Seita.8G099000/Seita.8G099100/Seita.9G0…	35		Ci603DEG	sita04075	Plant hormone signal transduction	41/456	267/5494	6.58786e-05	0.00164697	0.00150827	Seita.1G030500/Seita.1G195000/Seita.1G331600/Seita.2G058900/Seita.2G138400/Seita.2G177500/Seita.2G267500/Seita.3G019000/Seita.3G026500/Seita.3G026600/Seita.3G080900/Seita.3G139000/Seita.3G164700/Seita.3G207900/Seita.3G218800/Seita.3G223500/Seita.3G379400/Seita.3G379500/Seita.3G398000/Seita.4G026700/Seita.4G279000/Seita.5G126200/Seita.5G230500/Seita.5G243400/Seita.5G257700/Seita.5G379400/Seita.5G3…	41		Ci134DEG	sita00480	Glutathione metabolism	26/488	141/5494	0.000227835	0.0046934	0.00402908	Seita.2G444000/Seita.3G010000/Seita.4G114600/Seita.4G168600/Seita.4G241000/Seita.5G171100/Seita.5G194300/Seita.5G197500/Seita.5G279800/Seita.5G279900/Seita.5G328300/Seita.5G452100/Seita.5G453200/Seita.5G453300/Seita.5G453500/Seita.7G023900/Seita.7G102200/Seita.7G122100/Seita.7G225300/Seita.9G121000/Seita.9G262500/Seita.9G345300/Seita.9G345600/Seita.9G345800/Seita.9G345900/Seita.9G424300	26
Ci134DEG	sita04016	MAPK signaling pathway - plant	35/611	167/5494	0.000131022	0.00238023	0.0019998	Seita.1G013900/Seita.1G144700/Seita.2G024600/Seita.2G039200/Seita.2G138400/Seita.2G194500/Seita.3G003200/Seita.3G007100/Seita.3G139000/Seita.3G206900/Seita.4G163600/Seita.4G239500/Seita.4G286000/Seita.5G164400/Seita.5G175100/Seita.5G284600/Seita.5G354700/Seita.5G365500/Seita.5G395400/Seita.6G005300/Seita.6G120000/Seita.6G120100/Seita.7G100500/Seita.7G121700/Seita.7G193900/Seita.7G194000/Seita.7G2…	35		Ci603DEG	sita00906	Carotenoid biosynthesis	11/456	37/5494	0.000133508	0.00267017	0.00244531	Seita.2G035400/Seita.2G042900/Seita.2G104900/Seita.2G229900/Seita.3G391000/Seita.5G315800/Seita.6G181300/Seita.7G116800/Seita.7G189300/Seita.9G156500/Seita.9G559200	11		Ci134DEG	sita04016	MAPK signaling pathway - plant	29/488	167/5494	0.000296167	0.00508421	0.00436457	Seita.1G013900/Seita.1G185200/Seita.2G024600/Seita.2G177500/Seita.2G216800/Seita.2G437500/Seita.3G003200/Seita.3G139000/Seita.3G164700/Seita.3G218800/Seita.3G250400/Seita.3G343100/Seita.4G019700/Seita.4G185100/Seita.5G164400/Seita.5G284300/Seita.5G284400/Seita.5G379400/Seita.5G395400/Seita.6G005300/Seita.6G170500/Seita.7G021400/Seita.7G121700/Seita.7G194000/Seita.8G141900/Seita.9G318200/Seita.9G4…	29
Ci134DEG	sita00906	Carotenoid biosynthesis	12/611	37/5494	0.000430287	0.00670018	0.00562932	Seita.1G367300/Seita.2G104900/Seita.2G229900/Seita.2G303000/Seita.3G391000/Seita.3G397800/Seita.5G315600/Seita.5G315800/Seita.7G189300/Seita.8G101900/Seita.8G168400/Seita.9G041900	12		Ci603DEG	sita00500	Starch and sucrose metabolism	29/456	180/5494	0.000346817	0.00578029	0.00529353	Seita.1G060200/Seita.1G318200/Seita.1G323700/Seita.2G188200/Seita.2G254100/Seita.2G343000/Seita.2G396100/Seita.2G396200/Seita.3G059500/Seita.3G133300/Seita.3G176900/Seita.3G222700/Seita.3G270200/Seita.4G191200/Seita.5G429100/Seita.5G447800/Seita.6G022200/Seita.6G141700/Seita.7G164300/Seita.7G164500/Seita.8G083400/Seita.9G091600/Seita.9G125400/Seita.9G229700/Seita.9G389200/Seita.9G410800/Seita.9G4…	29		Ci134DEG	sita00051	Fructose and mannose metabolism	15/488	65/5494	0.000433669	0.00638112	0.00547792	Seita.2G167900/Seita.3G109600/Seita.4G101200/Seita.4G141400/Seita.4G194100/Seita.5G134800/Seita.5G316000/Seita.5G377200/Seita.6G090000/Seita.7G132000/Seita.8G050800/Seita.8G176300/Seita.9G021900/Seita.9G458800/Seita.9G460100	15
Ci134DEG	sita00531	Glycosaminoglycan degradation	7/611	17/5494	0.00145261	0.01906	0.0160137	Seita.1G354100/Seita.2G365000/Seita.4G053700/Seita.5G440300/Seita.5G440400/Seita.9G399100/Seita.9G494300	7		Ci603DEG	sita00940	Phenylpropanoid biosynthesis	40/456	282/5494	0.000455948	0.00651354	0.00596503	Seita.1G023000/Seita.1G065800/Seita.1G230100/Seita.1G240300/Seita.1G240600/Seita.2G208500/Seita.2G254100/Seita.2G431300/Seita.2G431500/Seita.3G053000/Seita.3G190400/Seita.3G222700/Seita.3G270200/Seita.3G270300/Seita.3G347500/Seita.4G048300/Seita.4G227800/Seita.4G259700/Seita.5G046600/Seita.5G053000/Seita.5G053200/Seita.5G361200/Seita.6G055900/Seita.6G163400/Seita.6G224300/Seita.7G155700/Seita.7G1…	40		Ci134DEG	sita00330	Arginine and proline metabolism	12/488	57/5494	0.00364815	0.043615	0.0374416	Seita.1G307000/Seita.1G352200/Seita.2G210300/Seita.2G313200/Seita.2G313400/Seita.3G020400/Seita.3G165100/Seita.3G220500/Seita.4G168600/Seita.5G381100/Seita.9G048800/Seita.9G330700	12
Ci134DEG	sita00052	Galactose metabolism	16/611	65/5494	0.00157376	0.01906	0.0160137	Seita.1G112800/Seita.2G081000/Seita.3G111200/Seita.3G119400/Seita.5G119800/Seita.5G134800/Seita.5G313600/Seita.6G195300/Seita.7G091600/Seita.7G091700/Seita.7G122900/Seita.7G123000/Seita.7G181300/Seita.8G228200/Seita.9G043300/Seita.9G208200	16		Ci328DEG	sita04075	Plant hormone signal transduction	32/263	267/5494	9.89184e-07	8.6059e-05	7.39285e-05	Seita.1G195000/Seita.1G331600/Seita.1G356800/Seita.2G177500/Seita.2G217500/Seita.2G231300/Seita.3G109400/Seita.3G139000/Seita.3G164700/Seita.3G189100/Seita.3G218800/Seita.3G246300/Seita.3G379400/Seita.5G134600/Seita.5G230500/Seita.5G243400/Seita.5G257700/Seita.5G389300/Seita.5G393800/Seita.5G451100/Seita.5G455300/Seita.6G005300/Seita.6G009300/Seita.7G021400/Seita.7G100500/Seita.7G121700/Seita.8G0…	32		Ci134DEG	sita00520	Amino sugar and nucleotide sugar metabolism	25/488	161/5494	0.00381102	0.043615	0.0374416	Seita.2G003000/Seita.2G168000/Seita.2G235900/Seita.2G247400/Seita.2G263800/Seita.2G282600/Seita.2G429400/Seita.3G109600/Seita.3G250400/Seita.4G101200/Seita.4G194100/Seita.5G134800/Seita.5G237300/Seita.5G467000/Seita.6G090000/Seita.6G120500/Seita.6G130900/Seita.7G150600/Seita.7G230800/Seita.7G305700/Seita.8G176300/Seita.9G102900/Seita.9G409000/Seita.9G422700/Seita.9G460100	25
Ci134DEG	sita00960	Tropane, piperidine and pyridine alkaloid biosynthesis	9/611	29/5494	0.00315806	0.0344229	0.0289212	Seita.1G216100/Seita.2G361800/Seita.4G177400/Seita.5G440100/Seita.8G149600/Seita.8G150700/Seita.8G216400/Seita.8G216500/Seita.8G252100	9		Ci328DEG	sita03030	DNA replication	11/263	54/5494	3.74237e-05	0.00162793	0.00139847	Seita.1G352100/Seita.1G356900/Seita.1G376600/Seita.3G082800/Seita.3G086800/Seita.3G205800/Seita.3G335500/Seita.5G192100/Seita.7G073600/Seita.8G121500/Seita.9G491000	11		Ci134DEG	sita00910	Nitrogen metabolism	9/488	38/5494	0.00502199	0.0494811	0.0424774	Seita.1G115800/Seita.1G116100/Seita.5G240000/Seita.5G240100/Seita.6G178500/Seita.6G179900/Seita.6G189200/Seita.7G090500/Seita.9G118300	9
Ci134DEG	sita00350	Tyrosine metabolism	14/611	59/5494	0.00434791	0.039638	0.0333028	Seita.1G216100/Seita.2G361800/Seita.3G096900/Seita.3G097200/Seita.4G177400/Seita.4G215500/Seita.8G099000/Seita.8G099100/Seita.8G149600/Seita.8G150700/Seita.8G209800/Seita.9G284900/Seita.9G510900/Seita.9G511000	14		Ci328DEG	sita00620	Pyruvate metabolism	14/263	113/5494	0.000905057	0.0200877	0.0172563	Seita.1G314800/Seita.3G020300/Seita.4G108300/Seita.4G175200/Seita.5G074000/Seita.5G134300/Seita.6G251800/Seita.7G144600/Seita.7G189800/Seita.9G073100/Seita.9G284800/Seita.9G284900/Seita.9G465500/Seita.9G510900	14		Ci134DEG	sita00010	Glycolysis / Gluconeogenesis	25/488	165/5494	0.00528439	0.0494811	0.0424774	Seita.1G307000/Seita.2G167900/Seita.2G235900/Seita.3G023100/Seita.3G109600/Seita.4G025700/Seita.4G108300/Seita.4G141400/Seita.5G113700/Seita.5G134800/Seita.5G377200/Seita.7G122800/Seita.7G123000/Seita.7G132000/Seita.7G268900/Seita.8G024300/Seita.8G050800/Seita.8G095900/Seita.8G099000/Seita.8G099100/Seita.9G156800/Seita.9G284800/Seita.9G314300/Seita.9G416100/Seita.9G458800	25
Ci134DEG	sita00071	Fatty acid degradation	13/611	53/5494	0.00436382	0.039638	0.0333028	Seita.1G307000/Seita.3G051400/Seita.3G170100/Seita.4G156800/Seita.5G386300/Seita.7G267400/Seita.7G283900/Seita.8G049100/Seita.8G099000/Seita.8G099100/Seita.9G284900/Seita.9G510900/Seita.9G511000	13		Ci328DEG	sita00052	Galactose metabolism	10/263	65/5494	0.000923574	0.0200877	0.0172563	Seita.1G112800/Seita.1G206800/Seita.2G438500/Seita.3G119400/Seita.5G119800/Seita.5G447800/Seita.6G195300/Seita.7G132000/Seita.8G228200/Seita.9G424800	10		Ci603DEG	sita00500	Starch and sucrose metabolism	51/707	180/5494	1.57299e-08	1.17786e-06	9.2989e-07	Seita.1G262000/Seita.1G318200/Seita.1G323700/Seita.2G112500/Seita.2G168000/Seita.2G188200/Seita.2G192600/Seita.2G235900/Seita.2G342700/Seita.2G343000/Seita.2G422000/Seita.3G176900/Seita.3G270200/Seita.3G281600/Seita.4G065500/Seita.4G139700/Seita.4G191200/Seita.5G056800/Seita.5G313600/Seita.5G318400/Seita.5G334800/Seita.5G384100/Seita.5G414600/Seita.5G429100/Seita.5G447800/Seita.6G118900/Seita.6G1…	51
Ci134DEG	sita00564	Glycerophospholipid metabolism	23/611	119/5494	0.00535632	0.044417	0.037318	Seita.1G116700/Seita.2G381500/Seita.3G158200/Seita.3G188000/Seita.3G291600/Seita.5G067300/Seita.5G096100/Seita.5G280600/Seita.5G282200/Seita.5G282300/Seita.5G299700/Seita.5G386400/Seita.5G447400/Seita.7G305300/Seita.8G009400/Seita.8G170900/Seita.8G196400/Seita.8G234000/Seita.9G007200/Seita.9G122800/Seita.9G173100/Seita.9G361200/Seita.9G378300	23		Ci328DEG	sita00906	Carotenoid biosynthesis	7/263	37/5494	0.00158976	0.0276617	0.0237627	Seita.2G229900/Seita.5G315800/Seita.6G181300/Seita.7G189300/Seita.7G209000/Seita.9G041800/Seita.9G559200	7		Ci603DEG	sita00196	Photosynthesis - antenna proteins	12/707	16/5494	2.10332e-08	1.17786e-06	9.2989e-07	Seita.2G299200/Seita.2G351600/Seita.2G352900/Seita.2G366600/Seita.3G143800/Seita.4G139900/Seita.4G219400/Seita.5G215600/Seita.6G158500/Seita.7G121800/Seita.8G080900/Seita.9G177100	12
Ci134DEG	sita02010	ABC transporters	10/611	37/5494	0.0057463	0.044417	0.037318	Seita.2G127900/Seita.3G159900/Seita.4G047900/Seita.5G031800/Seita.5G189700/Seita.5G302200/Seita.6G060300/Seita.7G029100/Seita.7G140300/Seita.7G258700	10		Ci328DEG	sita00500	Starch and sucrose metabolism	18/263	180/5494	0.00224827	0.0325999	0.0280048	Seita.1G112800/Seita.1G318200/Seita.2G254100/Seita.3G270200/Seita.4G288800/Seita.5G022400/Seita.5G447800/Seita.6G090000/Seita.6G118900/Seita.7G088700/Seita.8G083400/Seita.9G229700/Seita.9G381600/Seita.9G389200/Seita.9G410800/Seita.9G487200/Seita.9G492500/Seita.9G544600	18		Ci603DEG	sita04075	Plant hormone signal transduction	58/707	267/5494	2.58344e-05	0.000964485	0.000761435	Seita.1G013900/Seita.1G028400/Seita.1G050400/Seita.1G195000/Seita.1G331600/Seita.1G356800/Seita.2G029600/Seita.2G138400/Seita.2G177500/Seita.2G367800/Seita.2G437500/Seita.3G003200/Seita.3G019000/Seita.3G055700/Seita.3G080900/Seita.3G139000/Seita.3G164700/Seita.3G173700/Seita.3G218800/Seita.3G230400/Seita.3G369900/Seita.3G384900/Seita.4G026700/Seita.4G082000/Seita.4G226200/Seita.5G018300/Seita.5G0…	58
Ci134DEG	sita00250	Alanine, aspartate and glutamate metabolism	13/611	55/5494	0.00611243	0.044417	0.037318	Seita.1G069500/Seita.1G095500/Seita.3G165100/Seita.3G375200/Seita.4G177400/Seita.6G029400/Seita.6G177000/Seita.7G115400/Seita.7G236000/Seita.7G264800/Seita.9G118300/Seita.9G411100/Seita.9G440900	13		Ci409DEG	sita04016	MAPK signaling pathway - plant	11/119	167/5494	0.000904031	0.0312691	0.0288727	Seita.1G144700/Seita.3G139000/Seita.3G160800/Seita.3G164700/Seita.3G218800/Seita.5G257700/Seita.6G005300/Seita.7G021400/Seita.7G121700/Seita.7G239900/Seita.9G460200	11		Ci603DEG	sita00010	Glycolysis / Gluconeogenesis	40/707	165/5494	3.75706e-05	0.00105198	0.000830508	Seita.1G253300/Seita.2G178200/Seita.2G191000/Seita.2G218400/Seita.2G235900/Seita.2G288000/Seita.3G023100/Seita.3G111200/Seita.3G192600/Seita.3G219400/Seita.4G025700/Seita.4G108300/Seita.4G141400/Seita.5G113700/Seita.5G156300/Seita.5G251100/Seita.5G313600/Seita.5G349200/Seita.5G359900/Seita.5G377200/Seita.5G447800/Seita.6G162900/Seita.7G123000/Seita.7G226400/Seita.7G268900/Seita.7G286800/Seita.7G3…	40
Ci603DEG	sita00940	Phenylpropanoid biosynthesis	117/1016	282/5494	2.32105e-20	2.57637e-18	1.979e-18	Seita.1G022300/Seita.1G022400/Seita.1G023000/Seita.1G062400/Seita.1G098300/Seita.1G240300/Seita.1G240500/Seita.1G240600/Seita.1G281400/Seita.2G010900/Seita.2G371600/Seita.2G406500/Seita.2G407100/Seita.2G407300/Seita.2G408600/Seita.2G430900/Seita.2G431300/Seita.2G431500/Seita.2G431600/Seita.3G004800/Seita.3G004900/Seita.3G005000/Seita.3G005200/Seita.3G052900/Seita.3G053000/Seita.3G053100/Seita.3G1…	117		Ci409DEG	sita00906	Carotenoid biosynthesis	5/119	37/5494	0.00109716	0.0312691	0.0288727	Seita.2G035400/Seita.2G229900/Seita.8G101900/Seita.9G156500/Seita.9G559200	5		Ci603DEG	sita00710	Carbon fixation in photosynthetic organisms	24/707	83/5494	7.56226e-05	0.00169395	0.00133733	Seita.2G137100/Seita.2G288000/Seita.2G401000/Seita.3G192600/Seita.3G269600/Seita.3G284800/Seita.3G312000/Seita.3G312200/Seita.3G312400/Seita.4G119800/Seita.4G175200/Seita.4G177400/Seita.5G074200/Seita.5G134300/Seita.5G301800/Seita.5G314300/Seita.5G349200/Seita.5G377200/Seita.7G046700/Seita.7G123400/Seita.7G286800/Seita.8G050800/Seita.9G251000/Seita.9G554700	24
Ci603DEG	sita00010	Glycolysis / Gluconeogenesis	59/1016	165/5494	7.43878e-08	4.12852e-06	3.17127e-06	Seita.1G071600/Seita.1G177400/Seita.1G221800/Seita.1G295200/Seita.1G307000/Seita.1G314800/Seita.1G322900/Seita.2G167900/Seita.2G191000/Seita.2G394300/Seita.3G111200/Seita.3G192600/Seita.3G219400/Seita.3G227500/Seita.3G391300/Seita.4G093100/Seita.4G108300/Seita.4G141400/Seita.4G267900/Seita.4G268700/Seita.5G113700/Seita.5G134800/Seita.5G135500/Seita.5G158800/Seita.5G251100/Seita.5G313600/Seita.5G3…	59		Ci603up	sita03010	Ribosome	66/216	334/5494	1.35076e-30	1.02658e-28	9.8108e-29	Seita.1G003100/Seita.1G028300/Seita.1G073500/Seita.1G119400/Seita.1G160500/Seita.1G205300/Seita.1G214900/Seita.2G048400/Seita.2G134200/Seita.2G181800/Seita.2G262800/Seita.2G262900/Seita.2G267400/Seita.2G317300/Seita.2G318300/Seita.2G319400/Seita.2G362700/Seita.2G387500/Seita.2G394600/Seita.2G429500/Seita.3G036600/Seita.3G162800/Seita.3G280800/Seita.3G330100/Seita.4G005200/Seita.4G023300/Seita.4G1…	66		Ci603DEG	sita00195	Photosynthesis	25/707	90/5494	0.000110878	0.00206972	0.00163399	Seita.1G217200/Seita.1G321900/Seita.2G031300/Seita.2G117000/Seita.2G330500/Seita.2G356500/Seita.3G149000/Seita.3G184900/Seita.3G304000/Seita.4G207000/Seita.5G172700/Seita.5G336700/Seita.5G395300/Seita.5G446500/Seita.6G005700/Seita.6G032200/Seita.6G082000/Seita.7G092700/Seita.7G279400/Seita.9G045100/Seita.9G069300/Seita.9G414200/Seita.9G450200/Seita.9G561800/Seita.J002400	25
Ci603DEG	sita00500	Starch and sucrose metabolism	60/1016	180/5494	9.49701e-07	3.5139e-05	2.69915e-05	Seita.1G098300/Seita.1G112800/Seita.1G179000/Seita.1G323700/Seita.2G168000/Seita.2G188200/Seita.2G237100/Seita.2G315900/Seita.2G342900/Seita.2G366300/Seita.2G396200/Seita.2G398700/Seita.3G011400/Seita.3G059500/Seita.3G076100/Seita.3G133300/Seita.3G176900/Seita.3G253500/Seita.3G270000/Seita.3G281600/Seita.4G041500/Seita.4G092100/Seita.4G139700/Seita.4G191200/Seita.4G255800/Seita.4G263300/Seita.4G2…	60		Ci603up	sita00906	Carotenoid biosynthesis	8/216	37/5494	7.21954e-05	0.00212421	0.00203006	Seita.2G035400/Seita.2G042900/Seita.2G104900/Seita.2G229900/Seita.3G391000/Seita.6G181300/Seita.9G156500/Seita.9G559200	8		Ci603DEG	sita00941	Flavonoid biosynthesis	15/707	44/5494	0.00023495	0.0037592	0.00296779	Seita.1G230100/Seita.1G332100/Seita.1G349500/Seita.2G248300/Seita.3G026900/Seita.5G100900/Seita.5G101100/Seita.6G197600/Seita.7G249200/Seita.7G249600/Seita.7G301600/Seita.9G034700/Seita.9G242900/Seita.9G244600/Seita.9G393400	15
Ci603DEG	sita00910	Nitrogen metabolism	20/1016	38/5494	2.07383e-06	4.73702e-05	3.63868e-05	Seita.1G114900/Seita.1G115700/Seita.1G115800/Seita.1G116000/Seita.1G116100/Seita.1G181000/Seita.1G212900/Seita.1G311400/Seita.2G235500/Seita.3G024100/Seita.5G198500/Seita.5G240000/Seita.5G240100/Seita.5G286900/Seita.6G178500/Seita.6G179900/Seita.6G180000/Seita.7G325400/Seita.9G118300/Seita.9G226000	20		Ci603up	sita04016	MAPK signaling pathway - plant	18/216	167/5494	8.38504e-05	0.00212421	0.00203006	Seita.2G138400/Seita.2G177500/Seita.2G319600/Seita.3G139000/Seita.3G160800/Seita.3G164700/Seita.3G218800/Seita.5G233100/Seita.5G257700/Seita.5G379400/Seita.6G005300/Seita.7G021400/Seita.7G121700/Seita.9G318200/Seita.9G319200/Seita.9G379000/Seita.9G460200/Seita.9G552800	18		Ci603DEG	sita04016	MAPK signaling pathway - plant	37/707	167/5494	0.000510645	0.00714903	0.00564397	Seita.1G013900/Seita.1G117500/Seita.2G138400/Seita.2G177500/Seita.2G216800/Seita.2G437500/Seita.3G003200/Seita.3G139000/Seita.3G160800/Seita.3G164200/Seita.3G164700/Seita.3G206900/Seita.3G218800/Seita.3G230400/Seita.3G282000/Seita.3G343100/Seita.3G369900/Seita.4G019700/Seita.4G185100/Seita.5G231200/Seita.5G257700/Seita.5G284300/Seita.5G284400/Seita.5G365500/Seita.5G379400/Seita.5G395400/Seita.6G0…	37
Ci603DEG	sita04075	Plant hormone signal transduction	80/1016	267/5494	2.13379e-06	4.73702e-05	3.63868e-05	Seita.1G050400/Seita.1G061200/Seita.1G170700/Seita.1G333600/Seita.1G345400/Seita.1G356800/Seita.2G024800/Seita.2G058900/Seita.2G138400/Seita.2G163200/Seita.2G177500/Seita.2G217500/Seita.2G229500/Seita.2G253800/Seita.2G267500/Seita.2G394500/Seita.2G426000/Seita.2G439900/Seita.3G003200/Seita.3G109200/Seita.3G128200/Seita.3G139000/Seita.3G147000/Seita.3G164700/Seita.3G173700/Seita.3G207900/Seita.3G2…	80		Ci328up	sita04075	Plant hormone signal transduction	19/140	267/5494	3.92416e-05	0.00262919	0.00227188	Seita.1G331600/Seita.1G356800/Seita.2G177500/Seita.2G217500/Seita.2G231300/Seita.3G139000/Seita.3G164700/Seita.3G218800/Seita.3G246300/Seita.5G243400/Seita.5G257700/Seita.5G393800/Seita.6G005300/Seita.7G021400/Seita.7G121700/Seita.8G047400/Seita.9G252500/Seita.9G379000/Seita.9G460200	19		Ci603DEG	sita00052	Galactose metabolism	18/707	65/5494	0.00103291	0.0117353	0.00926475	Seita.2G081000/Seita.2G176100/Seita.2G282600/Seita.2G438500/Seita.3G111200/Seita.4G242100/Seita.5G119800/Seita.5G313600/Seita.5G447800/Seita.6G130900/Seita.6G195300/Seita.7G123000/Seita.7G181300/Seita.8G228200/Seita.9G118400/Seita.9G207800/Seita.9G208200/Seita.9G286800	18
Ci603DEG	sita00480	Glutathione metabolism	48/1016	141/5494	6.12563e-06	0.000113324	8.70484e-05	Seita.1G156200/Seita.1G166500/Seita.1G192100/Seita.1G221400/Seita.2G033200/Seita.2G033500/Seita.2G178900/Seita.2G293400/Seita.2G406500/Seita.2G444500/Seita.3G038600/Seita.3G038700/Seita.4G232000/Seita.4G241000/Seita.5G047800/Seita.5G104100/Seita.5G442000/Seita.5G452100/Seita.5G452900/Seita.5G453000/Seita.5G453200/Seita.5G453400/Seita.5G453500/Seita.6G210000/Seita.7G023900/Seita.7G116100/Seita.7G1…	48		Ci328up	sita04016	MAPK signaling pathway - plant	12/140	167/5494	0.00104214	0.0255907	0.022113	Seita.2G177500/Seita.3G139000/Seita.3G164700/Seita.3G218800/Seita.5G257700/Seita.5G284400/Seita.6G005300/Seita.7G021400/Seita.7G121700/Seita.9G379000/Seita.9G460200/Seita.9G552800	12		Ci603DEG	sita00460	Cyanoamino acid metabolism	21/707	81/5494	0.0010478	0.0117353	0.00926475	Seita.1G245800/Seita.1G245900/Seita.2G208700/Seita.3G270200/Seita.3G281600/Seita.4G139700/Seita.4G236300/Seita.5G056800/Seita.5G334800/Seita.5G414600/Seita.6G118900/Seita.7G122100/Seita.7G164300/Seita.7G164500/Seita.7G264800/Seita.8G115500/Seita.9G091400/Seita.9G091600/Seita.9G091800/Seita.9G125400/Seita.9G492500	21
Ci603DEG	sita00052	Galactose metabolism	26/1016	65/5494	3.94617e-05	0.000537619	0.000412965	Seita.1G112800/Seita.2G081000/Seita.2G282600/Seita.2G432600/Seita.2G438500/Seita.3G111200/Seita.4G263300/Seita.5G119800/Seita.5G134800/Seita.5G135500/Seita.5G313600/Seita.6G195300/Seita.7G091600/Seita.7G091700/Seita.7G122800/Seita.7G122900/Seita.7G123000/Seita.7G123100/Seita.7G132000/Seita.7G181300/Seita.8G228200/Seita.9G043300/Seita.9G207800/Seita.9G208200/Seita.9G258900/Seita.9G424800	26		Ci328up	sita00710	Carbon fixation in photosynthetic organisms	8/140	83/5494	0.00114585	0.0255907	0.022113	Seita.4G175200/Seita.4G267900/Seita.5G134300/Seita.5G384700/Seita.6G251800/Seita.8G050800/Seita.9G073100/Seita.9G525700	8		Ci603DEG	sita00860	Porphyrin and chlorophyll metabolism	15/707	51/5494	0.00136922	0.0139412	0.0110062	Seita.1G225800/Seita.1G318400/Seita.2G285600/Seita.3G001500/Seita.3G014700/Seita.4G016600/Seita.4G022100/Seita.4G271200/Seita.5G033900/Seita.5G040100/Seita.5G461800/Seita.7G217800/Seita.7G290300/Seita.9G041600/Seita.9G201900	15
Ci603DEG	sita04626	Plant-pathogen interaction	70/1016	243/5494	4.02906e-05	0.000537619	0.000412965	Seita.1G042400/Seita.1G102100/Seita.1G308900/Seita.1G336400/Seita.1G345400/Seita.2G024800/Seita.2G062100/Seita.2G246400/Seita.2G357800/Seita.3G053500/Seita.3G135500/Seita.3G142500/Seita.3G188100/Seita.3G206900/Seita.3G290500/Seita.3G350300/Seita.3G380800/Seita.4G163600/Seita.4G206600/Seita.4G225400/Seita.4G281500/Seita.4G284200/Seita.5G231500/Seita.5G286600/Seita.5G294600/Seita.5G330300/Seita.5G3…	70		Ci409up	sita04141	Protein processing in endoplasmic reticulum	11/60	217/5494	1.76092e-05	0.000581102	0.000500471	Seita.1G045200/Seita.1G326600/Seita.1G342400/Seita.2G241600/Seita.4G111400/Seita.5G092400/Seita.5G092900/Seita.5G093000/Seita.5G376100/Seita.6G122600/Seita.9G451500	11		Ci603DEG	sita00906	Carotenoid biosynthesis	12/707	37/5494	0.00161428	0.0148688	0.0117385	Seita.2G035400/Seita.2G104900/Seita.2G105100/Seita.2G303000/Seita.3G391000/Seita.3G397800/Seita.4G288600/Seita.7G116400/Seita.7G116800/Seita.9G156500/Seita.9G336100/Seita.9G559200	12
Ci603DEG	sita04016	MAPK signaling pathway - plant	52/1016	167/5494	4.35907e-05	0.000537619	0.000412965	Seita.1G049200/Seita.1G117500/Seita.1G144700/Seita.1G295400/Seita.1G345400/Seita.2G024800/Seita.2G039200/Seita.2G138400/Seita.2G177500/Seita.2G194500/Seita.2G394500/Seita.3G003200/Seita.3G007100/Seita.3G139000/Seita.3G164200/Seita.3G164700/Seita.3G206900/Seita.3G207900/Seita.3G218800/Seita.3G230400/Seita.3G250400/Seita.4G163600/Seita.4G223000/Seita.4G286000/Seita.5G257700/Seita.5G284300/Seita.5G2…	52		Ci409up	sita04016	MAPK signaling pathway - plant	9/60	167/5494	6.96415e-05	0.00114909	0.000989643	Seita.3G139000/Seita.3G160800/Seita.3G164700/Seita.3G218800/Seita.5G257700/Seita.6G005300/Seita.7G021400/Seita.7G121700/Seita.9G460200	9		Ci603DEG	sita00260	Glycine, serine and threonine metabolism	21/707	84/5494	0.00172584	0.0148688	0.0117385	Seita.1G072700/Seita.1G133500/Seita.2G109200/Seita.2G218400/Seita.2G260500/Seita.3G206500/Seita.5G156300/Seita.5G280800/Seita.5G291800/Seita.5G359900/Seita.6G072900/Seita.6G117900/Seita.6G151100/Seita.6G167400/Seita.7G127300/Seita.7G243300/Seita.7G268900/Seita.7G315100/Seita.7G315200/Seita.8G115500/Seita.9G416100	21
Ci603DEG	sita00531	Glycosaminoglycan degradation	10/1016	17/5494	0.000246291	0.00273382	0.00209995	Seita.1G354100/Seita.2G365000/Seita.3G240700/Seita.4G053700/Seita.5G409400/Seita.5G440300/Seita.5G440400/Seita.7G265200/Seita.8G078700/Seita.9G399100	10		Ci409up	sita04075	Plant hormone signal transduction	11/60	267/5494	0.000118776	0.00130653	0.00112524	Seita.3G139000/Seita.3G164700/Seita.3G218800/Seita.5G243400/Seita.5G257700/Seita.5G342900/Seita.5G393800/Seita.6G005300/Seita.7G021400/Seita.7G121700/Seita.9G460200	11		Ci603DEG	sita00905	Brassinosteroid biosynthesis	7/707	17/5494	0.00342818	0.0274254	0.0216517	Seita.2G219700/Seita.3G114000/Seita.4G224700/Seita.5G123900/Seita.5G139200/Seita.9G173500/Seita.9G480100	7
Ci603DEG	sita00906	Carotenoid biosynthesis	16/1016	37/5494	0.000429525	0.0043343	0.00332934	Seita.1G055200/Seita.1G367300/Seita.2G042900/Seita.2G104900/Seita.2G105100/Seita.2G229900/Seita.2G303000/Seita.3G391000/Seita.3G397800/Seita.5G315800/Seita.7G116400/Seita.7G189300/Seita.7G209000/Seita.8G101900/Seita.8G158400/Seita.8G168400	16		Ci409up	sita00906	Carotenoid biosynthesis	4/60	37/5494	0.000648653	0.00535139	0.00460885	Seita.2G035400/Seita.2G229900/Seita.9G156500/Seita.9G559200	4		Ci603DEG	sita00330	Arginine and proline metabolism	15/707	57/5494	0.00452202	0.0337644	0.0266561	Seita.1G244900/Seita.1G253300/Seita.1G352200/Seita.2G210400/Seita.2G218400/Seita.2G313300/Seita.3G020400/Seita.3G165100/Seita.3G220500/Seita.4G168600/Seita.4G177400/Seita.5G063800/Seita.5G381100/Seita.9G048800/Seita.9G507500	15
Ci603DEG	sita00904	Diterpenoid biosynthesis	15/1016	35/5494	0.000726194	0.00671729	0.0051598	Seita.2G144900/Seita.2G145800/Seita.2G145900/Seita.3G074700/Seita.4G235500/Seita.5G147400/Seita.5G157700/Seita.5G323400/Seita.5G404900/Seita.6G023100/Seita.6G089500/Seita.6G100500/Seita.8G166500/Seita.9G004400/Seita.9G262400	15		Ci134down	sita00940	Phenylpropanoid biosynthesis	32/200	282/5494	5.04084e-09	3.78063e-07	3.23675e-07	Seita.1G023000/Seita.1G023100/Seita.1G079000/Seita.1G230100/Seita.2G371600/Seita.2G431500/Seita.3G053000/Seita.3G194300/Seita.3G270400/Seita.3G271500/Seita.3G347500/Seita.4G176800/Seita.4G191500/Seita.4G259700/Seita.5G053000/Seita.5G356600/Seita.5G361200/Seita.6G055900/Seita.6G093400/Seita.6G224300/Seita.7G155700/Seita.8G015200/Seita.8G100100/Seita.9G091600/Seita.9G298200/Seita.9G298300/Seita.9G2…	32		Ci328DEG	sita00196	Photosynthesis - antenna proteins	11/689	16/5494	2.69524e-07	2.93781e-05	2.46827e-05	Seita.2G217800/Seita.2G351600/Seita.2G352900/Seita.2G366600/Seita.4G139900/Seita.4G219400/Seita.5G215600/Seita.6G158500/Seita.7G121800/Seita.8G080900/Seita.9G177100	11
Ci603DEG	sita02010	ABC transporters	15/1016	37/5494	0.00144829	0.0123661	0.00949888	Seita.1G055700/Seita.1G190900/Seita.1G191100/Seita.3G159900/Seita.5G031800/Seita.5G163300/Seita.5G189700/Seita.5G283000/Seita.5G283500/Seita.5G283600/Seita.6G060300/Seita.7G029100/Seita.7G039700/Seita.7G040200/Seita.7G140300	15		Ci134down	sita00073	Cutin, suberine and wax biosynthesis	7/200	37/5494	0.000309841	0.011619	0.00994754	Seita.4G260400/Seita.5G386300/Seita.6G138200/Seita.6G244100/Seita.7G197000/Seita.8G128800/Seita.9G214500	7		Ci328DEG	sita04075	Plant hormone signal transduction	59/689	267/5494	5.60192e-06	0.000305305	0.000256509	Seita.1G013900/Seita.1G028400/Seita.1G195000/Seita.1G252000/Seita.1G345400/Seita.2G058900/Seita.2G138400/Seita.2G177500/Seita.2G231300/Seita.2G267500/Seita.2G367800/Seita.2G375300/Seita.2G437500/Seita.3G055700/Seita.3G109200/Seita.3G139000/Seita.3G147000/Seita.3G164700/Seita.3G218800/Seita.3G223500/Seita.3G230400/Seita.3G246300/Seita.4G060600/Seita.4G082000/Seita.4G215800/Seita.4G226200/Seita.4G2…	59
Ci603DEG	sita00061	Fatty acid biosynthesis	20/1016	57/5494	0.00211053	0.0167335	0.0128536	Seita.1G166400/Seita.1G167200/Seita.2G108900/Seita.3G051400/Seita.3G087000/Seita.4G040200/Seita.4G067400/Seita.4G256200/Seita.6G021700/Seita.6G113700/Seita.6G255800/Seita.7G030200/Seita.7G259500/Seita.7G334200/Seita.8G028000/Seita.8G049100/Seita.9G234600/Seita.9G234800/Seita.9G276700/Seita.9G437400	20		Ci134down	sita00941	Flavonoid biosynthesis	7/200	44/5494	0.000929293	0.0232323	0.0198901	Seita.1G230100/Seita.3G194300/Seita.5G361200/Seita.7G155700/Seita.7G249200/Seita.7G249600/Seita.7G301600	7		Ci328DEG	sita00195	Photosynthesis	26/689	90/5494	2.46981e-05	0.000897364	0.000753942	Seita.1G016500/Seita.1G208500/Seita.2G030900/Seita.2G031300/Seita.2G117000/Seita.2G248100/Seita.2G330500/Seita.2G356500/Seita.3G149000/Seita.3G184900/Seita.3G304000/Seita.4G000900/Seita.4G207000/Seita.5G172700/Seita.5G336700/Seita.5G395300/Seita.6G005700/Seita.6G032200/Seita.6G082000/Seita.7G092700/Seita.7G279400/Seita.9G069300/Seita.J002400/Seita.J011100/Seita.J017900/Seita.J019900	26
Ci603DEG	sita00592	alpha-Linolenic acid metabolism	20/1016	58/5494	0.00267374	0.0197857	0.0151981	Seita.1G122400/Seita.3G070700/Seita.4G065000/Seita.4G077800/Seita.4G077900/Seita.4G078000/Seita.4G078100/Seita.4G078200/Seita.4G144800/Seita.4G156800/Seita.6G205300/Seita.7G109800/Seita.7G110100/Seita.7G113700/Seita.7G267400/Seita.8G099100/Seita.8G180100/Seita.9G122800/Seita.9G357200/Seita.9G483700	20		Ci603down	sita00196	Photosynthesis - antenna proteins	11/240	16/5494	3.17997e-12	2.70298e-10	2.37661e-10	Seita.2G299200/Seita.2G351600/Seita.2G352900/Seita.2G366600/Seita.3G143800/Seita.4G139900/Seita.5G215600/Seita.6G158500/Seita.7G121800/Seita.8G080900/Seita.9G177100	11		Ci328DEG	sita00940	Phenylpropanoid biosynthesis	58/689	282/5494	6.37069e-05	0.00173601	0.00145855	Seita.1G023000/Seita.1G023100/Seita.1G062400/Seita.1G065800/Seita.1G230100/Seita.1G283300/Seita.2G004800/Seita.2G371600/Seita.2G415300/Seita.2G431300/Seita.2G431400/Seita.2G431500/Seita.3G005200/Seita.3G052400/Seita.3G270000/Seita.3G281600/Seita.3G287400/Seita.4G047600/Seita.4G048300/Seita.4G135100/Seita.4G139700/Seita.4G176600/Seita.4G259700/Seita.5G029700/Seita.5G035700/Seita.5G046600/Seita.5G0…	58
Ci603DEG	sita00620	Pyruvate metabolism	33/1016	113/5494	0.00342881	0.0237874	0.0182719	Seita.1G177400/Seita.1G307000/Seita.1G314800/Seita.2G394300/Seita.2G401000/Seita.3G219400/Seita.3G391300/Seita.4G108300/Seita.5G134300/Seita.5G158800/Seita.5G301800/Seita.5G314300/Seita.5G324500/Seita.5G380500/Seita.6G036000/Seita.6G036100/Seita.6G156600/Seita.7G030200/Seita.7G268900/Seita.7G281700/Seita.7G283900/Seita.8G026900/Seita.8G099100/Seita.9G027100/Seita.9G073100/Seita.9G143700/Seita.9G2…	33		Ci603down	sita00940	Phenylpropanoid biosynthesis	35/240	282/5494	1.12759e-08	4.79226e-07	4.21362e-07	Seita.1G023000/Seita.1G065800/Seita.1G230100/Seita.1G240300/Seita.1G240600/Seita.2G208500/Seita.2G431300/Seita.2G431500/Seita.3G053000/Seita.3G190400/Seita.3G270300/Seita.3G347500/Seita.4G048300/Seita.4G227800/Seita.4G259700/Seita.5G046600/Seita.5G053000/Seita.5G361200/Seita.6G055900/Seita.6G163400/Seita.6G224300/Seita.7G155700/Seita.7G164300/Seita.7G164500/Seita.8G015200/Seita.9G081300/Seita.9G0…	35		Ci328DEG	sita00500	Starch and sucrose metabolism	40/689	180/5494	0.000164451	0.00358503	0.00301205	Seita.1G318200/Seita.1G347300/Seita.2G112500/Seita.2G134700/Seita.2G168000/Seita.2G188200/Seita.2G342700/Seita.2G343000/Seita.2G415300/Seita.2G422000/Seita.3G059500/Seita.3G133300/Seita.3G270000/Seita.3G281600/Seita.4G139700/Seita.4G191200/Seita.4G263300/Seita.5G056800/Seita.5G134800/Seita.5G318400/Seita.5G356600/Seita.5G356800/Seita.5G384100/Seita.6G090000/Seita.6G141700/Seita.7G164000/Seita.7G1…	40
Ci603DEG	sita00564	Glycerophospholipid metabolism	34/1016	119/5494	0.0044085	0.0287849	0.0221107	Seita.1G116700/Seita.1G171900/Seita.2G207900/Seita.2G381500/Seita.3G158200/Seita.3G166100/Seita.3G188000/Seita.3G193000/Seita.3G218600/Seita.3G291600/Seita.4G086600/Seita.5G028700/Seita.5G067300/Seita.5G096100/Seita.5G261900/Seita.5G280600/Seita.5G282300/Seita.5G296300/Seita.5G299700/Seita.5G340900/Seita.5G341700/Seita.5G386400/Seita.5G467900/Seita.6G051900/Seita.7G077400/Seita.7G253300/Seita.7G3…	34		Ci603down	sita00941	Flavonoid biosynthesis	8/240	44/5494	0.000533336	0.0151112	0.0132866	Seita.1G230100/Seita.1G332100/Seita.2G208500/Seita.5G361200/Seita.7G155700/Seita.7G249600/Seita.7G301600/Seita.9G034700	8		Ci328DEG	sita00564	Glycerophospholipid metabolism	29/689	119/5494	0.000253887	0.00398573	0.00334871	Seita.1G171900/Seita.2G088200/Seita.2G207900/Seita.2G217100/Seita.2G381500/Seita.3G095700/Seita.3G154100/Seita.3G166100/Seita.3G188000/Seita.3G218600/Seita.4G086600/Seita.4G277200/Seita.5G023200/Seita.5G096100/Seita.5G121900/Seita.5G236200/Seita.5G261900/Seita.5G282300/Seita.5G341700/Seita.5G350600/Seita.5G440500/Seita.5G447400/Seita.6G043300/Seita.7G305300/Seita.8G009400/Seita.9G306400/Seita.9G3…	29
Ci603DEG	sita00071	Fatty acid degradation	18/1016	53/5494	0.0051531	0.0317774	0.0244094	Seita.1G122400/Seita.1G307000/Seita.2G394300/Seita.3G051400/Seita.3G170100/Seita.4G065000/Seita.4G067400/Seita.4G156800/Seita.5G145200/Seita.5G386300/Seita.7G267400/Seita.7G283900/Seita.8G028000/Seita.8G049100/Seita.8G099100/Seita.9G284800/Seita.9G510900/Seita.9G511000	18		Ci603down	sita02010	ABC transporters	7/240	37/5494	0.000930054	0.0197637	0.0173773	Seita.1G191000/Seita.5G031800/Seita.5G282700/Seita.5G302200/Seita.6G253500/Seita.7G123300/Seita.7G258700	7		Ci328DEG	sita00052	Galactose metabolism	19/689	65/5494	0.000255965	0.00398573	0.00334871	Seita.2G081000/Seita.2G282600/Seita.2G438500/Seita.3G111200/Seita.3G119400/Seita.4G057000/Seita.4G263300/Seita.5G119800/Seita.5G134800/Seita.6G161700/Seita.6G195300/Seita.7G122800/Seita.7G122900/Seita.7G123000/Seita.7G132000/Seita.8G228200/Seita.9G207800/Seita.9G208200/Seita.9G424800	19
Ci603DEG	sita00905	Brassinosteroid biosynthesis	8/1016	17/5494	0.00664612	0.0388273	0.0298247	Seita.2G219700/Seita.2G413200/Seita.3G114000/Seita.4G224700/Seita.5G139200/Seita.7G318000/Seita.9G173500/Seita.9G480100	8		Ci603down	sita04075	Plant hormone signal transduction	23/240	267/5494	0.00125993	0.0214188	0.0188326	Seita.1G030500/Seita.1G195000/Seita.2G058900/Seita.3G019000/Seita.3G026500/Seita.3G080900/Seita.3G207900/Seita.3G223500/Seita.3G379400/Seita.3G379500/Seita.3G398000/Seita.4G026700/Seita.4G279000/Seita.5G126200/Seita.5G230500/Seita.5G387200/Seita.5G389500/Seita.5G455300/Seita.6G009300/Seita.7G313800/Seita.7G318100/Seita.9G311900/Seita.9G437300	23		Ci328DEG	sita00330	Arginine and proline metabolism	17/689	57/5494	0.000412477	0.00562	0.00472178	Seita.1G307000/Seita.2G313200/Seita.2G313300/Seita.2G313400/Seita.3G020400/Seita.3G165100/Seita.3G220500/Seita.4G021300/Seita.4G168600/Seita.5G063800/Seita.5G291400/Seita.5G381100/Seita.5G450800/Seita.7G242500/Seita.9G048800/Seita.9G330700/Seita.9G507500	17
Ci328DEG	sita00940	Phenylpropanoid biosynthesis	106/947	282/5494	3.80012e-17	4.21813e-15	3.2001e-15	Seita.1G022400/Seita.1G022500/Seita.1G023000/Seita.1G062400/Seita.1G079000/Seita.1G157600/Seita.1G230100/Seita.1G240500/Seita.1G240600/Seita.1G281400/Seita.1G349500/Seita.2G004800/Seita.2G208600/Seita.2G254100/Seita.2G320200/Seita.2G406500/Seita.2G406600/Seita.2G407100/Seita.2G407300/Seita.2G407500/Seita.2G407600/Seita.2G430900/Seita.2G431500/Seita.2G431600/Seita.3G004800/Seita.3G004900/Seita.3G0…	106		Ci328down	sita03030	DNA replication	11/123	54/5494	1.91589e-08	1.22617e-06	1.1092e-06	Seita.1G352100/Seita.1G356900/Seita.1G376600/Seita.3G082800/Seita.3G086800/Seita.3G205800/Seita.3G335500/Seita.5G192100/Seita.7G073600/Seita.8G121500/Seita.9G491000	11		Ci328DEG	sita00531	Glycosaminoglycan degradation	7/689	17/5494	0.00295149	0.0357458	0.0300327	Seita.1G354100/Seita.2G365000/Seita.3G364800/Seita.4G053700/Seita.5G440300/Seita.5G440400/Seita.9G487800	7
Ci328DEG	sita00500	Starch and sucrose metabolism	56/947	180/5494	2.52836e-06	0.000140324	0.000106457	Seita.1G112800/Seita.1G262000/Seita.1G323700/Seita.1G339700/Seita.1G378600/Seita.2G168000/Seita.2G188200/Seita.2G237100/Seita.2G254100/Seita.2G315900/Seita.2G396200/Seita.3G011400/Seita.3G017300/Seita.3G059500/Seita.3G109600/Seita.3G133300/Seita.4G041500/Seita.4G092100/Seita.4G139700/Seita.4G191200/Seita.4G255800/Seita.4G263300/Seita.4G286200/Seita.5G019600/Seita.5G022400/Seita.5G134800/Seita.5G3…	56		Ci328down	sita00520	Amino sugar and nucleotide sugar metabolism	13/123	161/5494	5.43444e-05	0.00173902	0.00157313	Seita.1G112800/Seita.1G319000/Seita.1G347800/Seita.2G263800/Seita.2G382900/Seita.3G337900/Seita.5G029100/Seita.5G447800/Seita.6G090000/Seita.6G219700/Seita.7G305700/Seita.8G008500/Seita.9G487800	13		Ci409DEG	sita00196	Photosynthesis - antenna proteins	14/611	16/5494	3.75174e-12	4.05187e-10	3.59377e-10	Seita.1G330600/Seita.2G166700/Seita.2G217800/Seita.2G351600/Seita.2G352900/Seita.2G366600/Seita.3G143800/Seita.4G139900/Seita.4G219400/Seita.5G215600/Seita.6G158500/Seita.7G121800/Seita.8G080900/Seita.9G177100	14
Ci328DEG	sita00531	Glycosaminoglycan degradation	11/947	17/5494	1.70086e-05	0.000545018	0.000413479	Seita.1G354100/Seita.2G365000/Seita.3G240700/Seita.3G364800/Seita.4G053700/Seita.5G409400/Seita.5G440300/Seita.5G440400/Seita.7G265200/Seita.8G078700/Seita.9G399100	11		Ci328down	sita00940	Phenylpropanoid biosynthesis	16/123	282/5494	0.000492241	0.0105011	0.00949939	Seita.1G023000/Seita.1G079000/Seita.3G022600/Seita.3G270300/Seita.3G347500/Seita.4G176800/Seita.4G247400/Seita.5G046600/Seita.5G155100/Seita.5G263000/Seita.6G026000/Seita.6G224300/Seita.7G128200/Seita.9G342200/Seita.9G478000/Seita.9G492500	16		Ci409DEG	sita00195	Photosynthesis	31/611	90/5494	2.89248e-09	1.56194e-07	1.38535e-07	Seita.1G003200/Seita.1G016500/Seita.1G208500/Seita.1G217200/Seita.1G321900/Seita.2G030900/Seita.2G031300/Seita.2G117000/Seita.2G248100/Seita.2G330500/Seita.2G356500/Seita.3G149000/Seita.3G184900/Seita.3G304000/Seita.4G207000/Seita.5G172700/Seita.5G336700/Seita.5G446500/Seita.6G005700/Seita.6G032200/Seita.6G082000/Seita.7G092700/Seita.7G279400/Seita.9G045100/Seita.9G069300/Seita.9G149700/Seita.9G4…	31
Ci328DEG	sita00010	Glycolysis / Gluconeogenesis	50/947	165/5494	1.96403e-05	0.000545018	0.000413479	Seita.1G004400/Seita.1G221800/Seita.1G253300/Seita.1G307000/Seita.1G314800/Seita.1G322900/Seita.2G394300/Seita.2G394400/Seita.3G109600/Seita.3G111200/Seita.3G140600/Seita.3G227500/Seita.3G247900/Seita.3G391300/Seita.4G093100/Seita.4G108300/Seita.4G141400/Seita.4G267900/Seita.5G113700/Seita.5G134800/Seita.5G158800/Seita.5G313600/Seita.5G377200/Seita.5G377300/Seita.5G380500/Seita.6G079600/Seita.6G1…	50		Ci409down	sita00940	Phenylpropanoid biosynthesis	12/59	282/5494	3.38074e-05	0.00141991	0.0013523	Seita.1G023100/Seita.2G431300/Seita.4G191500/Seita.4G259700/Seita.5G053000/Seita.6G224300/Seita.9G298200/Seita.9G298300/Seita.9G298400/Seita.9G478000/Seita.9G562600/Seita.J003300	12		Ci409DEG	sita00710	Carbon fixation in photosynthetic organisms	26/611	83/5494	4.82507e-07	1.73702e-05	1.54064e-05	Seita.1G283800/Seita.2G051000/Seita.2G288000/Seita.3G109300/Seita.3G192600/Seita.3G219800/Seita.3G227500/Seita.3G269500/Seita.3G269600/Seita.3G312000/Seita.3G312200/Seita.3G312400/Seita.4G023100/Seita.4G119800/Seita.4G175200/Seita.5G074200/Seita.5G301800/Seita.5G314300/Seita.5G381500/Seita.5G384700/Seita.7G046700/Seita.7G123400/Seita.7G286800/Seita.8G050800/Seita.9G458800/Seita.9G554700	26
Ci328DEG	sita00480	Glutathione metabolism	43/947	141/5494	6.31952e-05	0.00140293	0.00106434	Seita.1G166500/Seita.1G192100/Seita.2G033500/Seita.2G178900/Seita.2G406500/Seita.2G444500/Seita.3G010000/Seita.3G038600/Seita.3G060800/Seita.5G047800/Seita.5G104100/Seita.5G169900/Seita.5G171200/Seita.5G216600/Seita.5G279900/Seita.5G442000/Seita.5G452100/Seita.5G452900/Seita.6G153400/Seita.6G210000/Seita.7G023900/Seita.7G153200/Seita.7G225300/Seita.8G040400/Seita.8G106200/Seita.9G064400/Seita.9G1…	43		Ci409down	sita00520	Amino sugar and nucleotide sugar metabolism	8/59	161/5494	0.000284039	0.00596483	0.00568079	Seita.2G263800/Seita.2G382900/Seita.3G337900/Seita.6G090000/Seita.6G105300/Seita.7G235100/Seita.7G257800/Seita.8G081300	8		Ci409DEG	sita00906	Carotenoid biosynthesis	15/611	37/5494	3.73865e-06	0.000100944	8.95309e-05	Seita.1G288100/Seita.2G035400/Seita.2G104900/Seita.2G105100/Seita.2G303000/Seita.3G391000/Seita.4G288600/Seita.5G258300/Seita.6G181300/Seita.7G067200/Seita.7G116800/Seita.7G209000/Seita.9G041900/Seita.9G156500/Seita.9G559200	15
Ci328DEG	sita04075	Plant hormone signal transduction	70/947	267/5494	0.000102812	0.00190202	0.00144297	Seita.1G050400/Seita.1G170700/Seita.1G345400/Seita.1G356800/Seita.2G024600/Seita.2G024900/Seita.2G138400/Seita.2G177500/Seita.2G200400/Seita.2G216400/Seita.2G217500/Seita.2G231300/Seita.2G375300/Seita.2G388400/Seita.3G109400/Seita.3G128200/Seita.3G139000/Seita.3G147000/Seita.3G173700/Seita.3G189100/Seita.3G207900/Seita.3G230400/Seita.3G379400/Seita.4G026700/Seita.4G082000/Seita.4G246300/Seita.4G2…	70													Ci409DEG	sita00030	Pentose phosphate pathway	15/611	60/5494	0.00185003	0.0385145	0.0341601	Seita.2G051000/Seita.2G167900/Seita.3G111200/Seita.3G219800/Seita.3G227500/Seita.4G023100/Seita.5G381500/Seita.5G437000/Seita.7G046700/Seita.7G286800/Seita.8G050800/Seita.9G365500/Seita.9G424300/Seita.9G458800/Seita.9G580300	15
Ci328DEG	sita04626	Plant-pathogen interaction	64/947	243/5494	0.000176816	0.0028038	0.00212711	Seita.1G102100/Seita.1G308900/Seita.1G345400/Seita.2G024600/Seita.2G024900/Seita.2G128800/Seita.2G246400/Seita.2G357800/Seita.3G053500/Seita.3G079700/Seita.3G135500/Seita.3G137500/Seita.3G142500/Seita.3G170600/Seita.3G188100/Seita.3G206900/Seita.3G261400/Seita.3G282000/Seita.3G290500/Seita.3G350300/Seita.3G380800/Seita.4G206600/Seita.4G225400/Seita.5G097100/Seita.5G175100/Seita.5G217800/Seita.5G2…	64													Ci409DEG	sita00941	Flavonoid biosynthesis	12/611	44/5494	0.00236111	0.0385145	0.0341601	Seita.1G230100/Seita.1G332100/Seita.1G349500/Seita.3G026900/Seita.4G047600/Seita.5G101100/Seita.5G361200/Seita.6G197600/Seita.7G249200/Seita.8G140200/Seita.9G242900/Seita.9G393400	12
Ci328DEG	sita04016	MAPK signaling pathway - plant	46/947	167/5494	0.000498357	0.0069147	0.00524586	Seita.1G117500/Seita.1G345400/Seita.2G024600/Seita.2G024900/Seita.2G039200/Seita.2G138400/Seita.2G177500/Seita.2G194500/Seita.3G139000/Seita.3G160800/Seita.3G170600/Seita.3G206900/Seita.3G207900/Seita.3G230400/Seita.3G282000/Seita.5G175100/Seita.5G284300/Seita.5G284400/Seita.5G284600/Seita.5G354700/Seita.5G365500/Seita.5G395400/Seita.6G005300/Seita.6G056700/Seita.6G120100/Seita.6G170500/Seita.6G2…	46													Ci409DEG	sita04075	Plant hormone signal transduction	45/611	267/5494	0.00249631	0.0385145	0.0341601	Seita.1G013900/Seita.1G028400/Seita.1G195000/Seita.1G252000/Seita.1G331600/Seita.1G345400/Seita.2G029600/Seita.2G058900/Seita.2G177500/Seita.2G217500/Seita.2G231300/Seita.2G267500/Seita.2G367800/Seita.2G437500/Seita.3G109200/Seita.3G139000/Seita.3G164700/Seita.3G218800/Seita.3G230400/Seita.4G082000/Seita.4G226200/Seita.5G034000/Seita.5G126200/Seita.5G175100/Seita.5G231200/Seita.5G257700/Seita.5G3…	45
Ci328DEG	sita00620	Pyruvate metabolism	33/947	113/5494	0.00102874	0.0126877	0.0096256	Seita.1G004400/Seita.1G253300/Seita.1G307000/Seita.1G314800/Seita.2G137100/Seita.2G394300/Seita.2G394400/Seita.2G401000/Seita.3G020300/Seita.3G247900/Seita.3G391300/Seita.4G108300/Seita.4G117200/Seita.5G158800/Seita.5G301800/Seita.5G314300/Seita.5G380500/Seita.6G036000/Seita.6G036100/Seita.6G156600/Seita.7G030200/Seita.7G268900/Seita.7G281700/Seita.7G283900/Seita.8G099100/Seita.9G027100/Seita.9G1…	33													Ci409DEG	sita00860	Porphyrin and chlorophyll metabolism	13/611	51/5494	0.00304265	0.0410758	0.0364318	Seita.1G318400/Seita.2G285600/Seita.3G001500/Seita.3G014700/Seita.4G022100/Seita.5G033900/Seita.5G040100/Seita.7G217800/Seita.7G232700/Seita.7G290300/Seita.9G041600/Seita.9G152400/Seita.9G201900	13
Ci328DEG	sita00904	Diterpenoid biosynthesis	14/947	35/5494	0.00119338	0.0132465	0.0100495	Seita.2G144900/Seita.2G145800/Seita.2G145900/Seita.4G235500/Seita.4G235600/Seita.5G157700/Seita.5G323400/Seita.5G404900/Seita.6G023100/Seita.6G089500/Seita.6G100500/Seita.8G166500/Seita.9G004400/Seita.9G262400	14													Ci134up	sita04075	Plant hormone signal transduction	28/241	267/5494	1.21366e-05	0.0010923	0.000983707	Seita.1G075600/Seita.1G356800/Seita.2G024600/Seita.2G058900/Seita.2G142900/Seita.2G177500/Seita.2G375300/Seita.2G437500/Seita.3G104000/Seita.3G139000/Seita.3G164700/Seita.3G218800/Seita.4G060600/Seita.4G082000/Seita.4G226200/Seita.5G126200/Seita.5G312700/Seita.5G379400/Seita.5G393800/Seita.5G395400/Seita.6G005300/Seita.7G021400/Seita.7G121700/Seita.9G097300/Seita.9G251600/Seita.9G314200/Seita.9G3…	28
Ci328DEG	sita00520	Amino sugar and nucleotide sugar metabolism	43/947	161/5494	0.00148311	0.014966	0.011354	Seita.1G112800/Seita.1G225300/Seita.2G107300/Seita.2G168000/Seita.2G247400/Seita.2G365000/Seita.2G382900/Seita.2G429400/Seita.2G435100/Seita.3G011800/Seita.3G109600/Seita.3G133300/Seita.3G240700/Seita.3G271400/Seita.3G337900/Seita.5G029100/Seita.5G087000/Seita.5G134800/Seita.5G278700/Seita.5G313600/Seita.5G389800/Seita.5G389900/Seita.5G390000/Seita.5G390100/Seita.5G409400/Seita.5G467000/Seita.6G0…	43													Ci134up	sita00480	Glutathione metabolism	18/241	141/5494	3.70257e-05	0.00166616	0.00150051	Seita.4G114600/Seita.4G168600/Seita.4G241000/Seita.5G171100/Seita.5G194300/Seita.5G279800/Seita.5G279900/Seita.5G452100/Seita.5G453200/Seita.5G453300/Seita.5G453500/Seita.7G023900/Seita.7G102200/Seita.7G122100/Seita.9G121000/Seita.9G262500/Seita.9G345300/Seita.9G424300	18
Ci328DEG	sita00052	Galactose metabolism	21/947	65/5494	0.00213594	0.0191142	0.014501	Seita.1G112800/Seita.2G081000/Seita.2G438500/Seita.3G109600/Seita.3G111200/Seita.4G057000/Seita.4G263300/Seita.5G119800/Seita.5G134800/Seita.5G313600/Seita.6G195300/Seita.7G122800/Seita.7G122900/Seita.7G123000/Seita.7G132000/Seita.7G181300/Seita.8G228200/Seita.9G043300/Seita.9G207800/Seita.9G208200/Seita.9G424800	21													Ci134up	sita04016	MAPK signaling pathway - plant	18/241	167/5494	0.00033531	0.0100593	0.00905925	Seita.2G024600/Seita.2G177500/Seita.2G437500/Seita.3G139000/Seita.3G164700/Seita.3G218800/Seita.4G185100/Seita.5G164400/Seita.5G284300/Seita.5G284400/Seita.5G379400/Seita.5G395400/Seita.6G005300/Seita.7G021400/Seita.7G121700/Seita.8G141900/Seita.9G318200/Seita.9G460200	18
Ci328DEG	sita00073	Cutin, suberine and wax biosynthesis	14/947	37/5494	0.0022386	0.0191142	0.014501	Seita.1G265100/Seita.1G310900/Seita.2G132800/Seita.4G112000/Seita.4G260400/Seita.5G386300/Seita.5G434700/Seita.6G243900/Seita.6G244000/Seita.7G162900/Seita.7G197000/Seita.8G128800/Seita.9G214500/Seita.9G486300	14													Ci134up	sita00051	Fructose and mannose metabolism	10/241	65/5494	0.000465782	0.0104801	0.00943822	Seita.2G167900/Seita.3G109600/Seita.4G101200/Seita.4G141400/Seita.5G134800/Seita.5G377200/Seita.7G132000/Seita.8G176300/Seita.9G021900/Seita.9G460100	10
Ci328DEG	sita00564	Glycerophospholipid metabolism	33/947	119/5494	0.00265089	0.0210178	0.0159452	Seita.1G116700/Seita.1G171900/Seita.2G293200/Seita.2G381500/Seita.3G125800/Seita.3G158200/Seita.3G188000/Seita.3G218600/Seita.3G291600/Seita.5G028700/Seita.5G067300/Seita.5G096100/Seita.5G261900/Seita.5G280600/Seita.5G282300/Seita.5G299700/Seita.5G340900/Seita.5G341700/Seita.5G386400/Seita.5G440600/Seita.5G447400/Seita.5G467900/Seita.6G225700/Seita.7G077400/Seita.7G081500/Seita.7G253300/Seita.8G0…	33													Ci134up	sita00500	Starch and sucrose metabolism	17/241	180/5494	0.00216281	0.0389305	0.0350603	Seita.2G168000/Seita.2G342900/Seita.3G109600/Seita.4G101200/Seita.4G191200/Seita.5G134800/Seita.5G237300/Seita.5G334800/Seita.5G414600/Seita.9G091800/Seita.9G229700/Seita.9G350600/Seita.9G381600/Seita.9G389200/Seita.9G410800/Seita.9G416600/Seita.9G544600	17
Ci328DEG	sita00350	Tyrosine metabolism	19/947	59/5494	0.00355877	0.0263349	0.0199791	Seita.1G216100/Seita.2G361800/Seita.2G394300/Seita.2G394400/Seita.3G096900/Seita.3G097200/Seita.3G231000/Seita.4G177400/Seita.4G215500/Seita.6G067600/Seita.6G067700/Seita.6G067800/Seita.8G099100/Seita.8G149600/Seita.8G150700/Seita.8G209800/Seita.9G256000/Seita.9G510900/Seita.9G511000	19													Ci603up	sita04016	MAPK signaling pathway - plant	26/322	167/5494	3.44992e-06	0.000351892	0.000319572	Seita.1G117500/Seita.2G138400/Seita.2G177500/Seita.2G437500/Seita.3G139000/Seita.3G160800/Seita.3G164200/Seita.3G164700/Seita.3G206900/Seita.3G218800/Seita.3G230400/Seita.3G282000/Seita.3G369900/Seita.4G185100/Seita.5G231200/Seita.5G257700/Seita.5G284300/Seita.5G284400/Seita.5G365500/Seita.5G379400/Seita.5G395400/Seita.6G005300/Seita.7G021400/Seita.7G121700/Seita.9G318200/Seita.9G460200	26
Ci328DEG	sita00950	Isoquinoline alkaloid biosynthesis	12/947	32/5494	0.00495893	0.0331049	0.0251152	Seita.1G216100/Seita.2G361800/Seita.3G231000/Seita.4G177400/Seita.4G215500/Seita.6G067600/Seita.6G067700/Seita.6G067800/Seita.8G149600/Seita.8G150700/Seita.8G209800/Seita.9G256000	12													Ci603up	sita04075	Plant hormone signal transduction	31/322	267/5494	0.000164733	0.00840137	0.00762973	Seita.1G331600/Seita.1G356800/Seita.2G138400/Seita.2G177500/Seita.2G437500/Seita.3G080900/Seita.3G139000/Seita.3G164700/Seita.3G218800/Seita.3G230400/Seita.3G369900/Seita.4G082000/Seita.4G226200/Seita.5G126200/Seita.5G137400/Seita.5G231200/Seita.5G257700/Seita.5G312700/Seita.5G379400/Seita.5G393800/Seita.5G395400/Seita.5G451100/Seita.6G005300/Seita.7G021400/Seita.7G121700/Seita.7G230900/Seita.9G0…	31
Ci328DEG	sita00941	Flavonoid biosynthesis	15/947	44/5494	0.00507012	0.0331049	0.0251152	Seita.1G157600/Seita.1G230100/Seita.1G349500/Seita.2G208600/Seita.5G237900/Seita.6G164300/Seita.7G036600/Seita.7G036700/Seita.7G047600/Seita.7G249600/Seita.7G301600/Seita.7G301800/Seita.8G140200/Seita.9G034700/Seita.9G244600	15													Ci603up	sita00261	Monobactam biosynthesis	5/322	13/5494	0.00058358	0.0198417	0.0180193	Seita.2G109200/Seita.4G159800/Seita.4G190200/Seita.6G117900/Seita.7G207200	5
Ci409DEG	sita00940	Phenylpropanoid biosynthesis	91/817	282/5494	2.79021e-14	3.06923e-12	2.46714e-12	Seita.1G022400/Seita.1G022900/Seita.1G079000/Seita.1G098300/Seita.1G098500/Seita.1G157600/Seita.1G240400/Seita.1G240500/Seita.1G240600/Seita.1G281400/Seita.2G208500/Seita.2G320200/Seita.2G371600/Seita.2G406500/Seita.2G407300/Seita.2G430900/Seita.2G431300/Seita.2G431500/Seita.2G431600/Seita.3G004800/Seita.3G004900/Seita.3G005000/Seita.3G005100/Seita.3G005200/Seita.3G052400/Seita.3G052900/Seita.3G0…	91													Ci603up	sita00906	Carotenoid biosynthesis	8/322	37/5494	0.00110225	0.0281073	0.0255257	Seita.2G035400/Seita.2G104900/Seita.2G105100/Seita.2G303000/Seita.3G391000/Seita.7G116800/Seita.9G156500/Seita.9G559200	8
Ci409DEG	sita00010	Glycolysis / Gluconeogenesis	47/817	165/5494	3.75797e-06	0.000198077	0.000159219	Seita.1G004400/Seita.1G071600/Seita.1G221800/Seita.1G307000/Seita.1G314800/Seita.1G322900/Seita.2G057100/Seita.2G394300/Seita.3G111200/Seita.3G247900/Seita.4G093100/Seita.4G108300/Seita.4G141400/Seita.4G267900/Seita.4G268700/Seita.5G113700/Seita.5G134800/Seita.5G251100/Seita.5G313600/Seita.5G377300/Seita.5G380500/Seita.6G156600/Seita.6G162900/Seita.7G122800/Seita.7G122900/Seita.7G123000/Seita.7G1…	47													Ci328up	sita00564	Glycerophospholipid metabolism	19/335	119/5494	8.87661e-05	0.00869907	0.00775535	Seita.1G171900/Seita.2G217100/Seita.2G381500/Seita.3G095700/Seita.3G188000/Seita.3G218600/Seita.4G086600/Seita.4G277200/Seita.5G023200/Seita.5G096100/Seita.5G121900/Seita.5G261900/Seita.5G282300/Seita.5G341700/Seita.5G350600/Seita.7G305300/Seita.8G009400/Seita.9G306400/Seita.9G361200	19
Ci409DEG	sita04016	MAPK signaling pathway - plant	47/817	167/5494	5.40209e-06	0.000198077	0.000159219	Seita.1G030500/Seita.1G049200/Seita.1G144700/Seita.2G024600/Seita.2G024800/Seita.2G039200/Seita.2G138400/Seita.2G177500/Seita.2G437500/Seita.3G139000/Seita.3G160700/Seita.3G160800/Seita.3G164700/Seita.3G206900/Seita.3G207900/Seita.3G218800/Seita.3G230400/Seita.4G163600/Seita.4G223000/Seita.4G239500/Seita.4G286000/Seita.5G175100/Seita.5G257700/Seita.5G284400/Seita.5G284600/Seita.5G365500/Seita.5G3…	47													Ci328up	sita04075	Plant hormone signal transduction	31/335	267/5494	0.000336013	0.0164646	0.0146785	Seita.1G252000/Seita.2G058900/Seita.2G177500/Seita.2G267500/Seita.2G375300/Seita.2G437500/Seita.3G055700/Seita.3G139000/Seita.3G147000/Seita.3G164700/Seita.3G218800/Seita.3G230400/Seita.3G246300/Seita.4G060600/Seita.4G082000/Seita.4G226200/Seita.4G279000/Seita.5G257700/Seita.5G312700/Seita.5G393800/Seita.5G395400/Seita.6G005300/Seita.7G021400/Seita.7G108800/Seita.7G121700/Seita.9G252500/Seita.9G3…	31
Ci409DEG	sita00904	Diterpenoid biosynthesis	16/817	35/5494	1.24348e-05	0.000341957	0.000274875	Seita.2G038800/Seita.2G144900/Seita.2G145800/Seita.2G145900/Seita.3G074700/Seita.4G235500/Seita.4G235600/Seita.5G157700/Seita.5G323400/Seita.5G404900/Seita.6G023100/Seita.6G089500/Seita.6G100500/Seita.6G101900/Seita.9G262400/Seita.9G415500	16													Ci328up	sita00906	Carotenoid biosynthesis	8/335	37/5494	0.00142519	0.0411722	0.0367056	Seita.2G229900/Seita.2G303000/Seita.3G391000/Seita.3G397800/Seita.6G181300/Seita.7G209000/Seita.9G156500/Seita.9G559200	8
Ci409DEG	sita00620	Pyruvate metabolism	31/817	113/5494	0.000353971	0.00704989	0.0056669	Seita.1G004400/Seita.1G307000/Seita.1G314800/Seita.2G057100/Seita.2G137100/Seita.2G394300/Seita.2G401000/Seita.3G109300/Seita.3G247900/Seita.4G108300/Seita.4G119800/Seita.5G301800/Seita.5G314300/Seita.5G324500/Seita.5G380500/Seita.6G036000/Seita.6G036100/Seita.6G156600/Seita.6G251800/Seita.7G030200/Seita.7G268900/Seita.7G281700/Seita.7G283900/Seita.8G099000/Seita.8G099100/Seita.9G027100/Seita.9G1…	31													Ci328up	sita00052	Galactose metabolism	11/335	65/5494	0.0016805	0.0411722	0.0367056	Seita.2G081000/Seita.2G438500/Seita.3G119400/Seita.4G057000/Seita.5G119800/Seita.5G134800/Seita.6G161700/Seita.7G132000/Seita.8G228200/Seita.9G208200/Seita.9G424800	11
Ci409DEG	sita00500	Starch and sucrose metabolism	44/817	180/5494	0.000401953	0.00704989	0.0056669	Seita.1G098300/Seita.1G098500/Seita.1G112800/Seita.1G378600/Seita.2G168000/Seita.2G188200/Seita.2G237100/Seita.2G315900/Seita.2G386000/Seita.2G396200/Seita.3G017300/Seita.3G059500/Seita.3G076100/Seita.3G133300/Seita.3G281600/Seita.4G041500/Seita.4G139700/Seita.4G191200/Seita.4G263300/Seita.5G019600/Seita.5G134800/Seita.5G313600/Seita.5G318400/Seita.5G334800/Seita.5G429100/Seita.6G022200/Seita.6G0…	44													Ci409up	sita00906	Carotenoid biosynthesis	10/246	37/5494	3.22671e-06	0.000296857	0.000275119	Seita.1G288100/Seita.2G035400/Seita.2G105100/Seita.2G303000/Seita.3G391000/Seita.6G181300/Seita.7G116800/Seita.7G209000/Seita.9G156500/Seita.9G559200	10
Ci409DEG	sita04075	Plant hormone signal transduction	60/817	267/5494	0.00044863	0.00704989	0.0056669	Seita.1G030500/Seita.2G024600/Seita.2G024800/Seita.2G138400/Seita.2G177500/Seita.2G217500/Seita.2G229500/Seita.2G267500/Seita.2G388400/Seita.2G426000/Seita.2G437500/Seita.3G109400/Seita.3G139000/Seita.3G147000/Seita.3G164700/Seita.3G207900/Seita.3G218800/Seita.3G224800/Seita.3G230400/Seita.3G379400/Seita.3G398000/Seita.4G050700/Seita.4G082000/Seita.4G239500/Seita.4G246300/Seita.4G266100/Seita.5G1…	60													Ci409up	sita04016	MAPK signaling pathway - plant	20/246	167/5494	4.70589e-05	0.00150037	0.0013905	Seita.1G117500/Seita.2G177500/Seita.2G437500/Seita.3G139000/Seita.3G164700/Seita.3G218800/Seita.3G230400/Seita.4G185100/Seita.5G175100/Seita.5G231200/Seita.5G257700/Seita.5G284300/Seita.5G379400/Seita.5G395400/Seita.6G005300/Seita.7G021400/Seita.7G121700/Seita.9G318200/Seita.9G379000/Seita.9G460200	20
Ci409DEG	sita00480	Glutathione metabolism	36/817	141/5494	0.00055997	0.00769959	0.00618914	Seita.1G166500/Seita.1G192100/Seita.1G221400/Seita.2G033300/Seita.2G033500/Seita.2G406500/Seita.2G444500/Seita.3G038600/Seita.3G348900/Seita.4G009400/Seita.4G232000/Seita.4G241000/Seita.5G047800/Seita.5G104100/Seita.5G169900/Seita.5G279800/Seita.5G452900/Seita.6G210000/Seita.7G153200/Seita.7G225300/Seita.8G008300/Seita.8G040400/Seita.9G064400/Seita.9G121100/Seita.9G157600/Seita.9G261500/Seita.9G2…	36													Ci409up	sita04075	Plant hormone signal transduction	27/246	267/5494	4.8925e-05	0.00150037	0.0013905	Seita.1G252000/Seita.1G331600/Seita.2G058900/Seita.2G177500/Seita.2G267500/Seita.2G437500/Seita.3G139000/Seita.3G164700/Seita.3G218800/Seita.3G230400/Seita.4G082000/Seita.4G226200/Seita.5G126200/Seita.5G175100/Seita.5G231200/Seita.5G257700/Seita.5G312700/Seita.5G379400/Seita.5G393800/Seita.5G395400/Seita.6G005300/Seita.7G021400/Seita.7G121700/Seita.7G230900/Seita.9G318200/Seita.9G379000/Seita.9G4…	27
Ci409DEG	sita00052	Galactose metabolism	20/817	65/5494	0.000821698	0.010043	0.00807282	Seita.1G112800/Seita.2G081000/Seita.2G438500/Seita.3G111200/Seita.3G119400/Seita.4G263300/Seita.5G119800/Seita.5G134800/Seita.5G313600/Seita.6G195300/Seita.7G122800/Seita.7G122900/Seita.7G123000/Seita.7G132000/Seita.7G181300/Seita.8G228200/Seita.9G043300/Seita.9G207800/Seita.9G208200/Seita.9G424800	20													Ci409up	sita00564	Glycerophospholipid metabolism	15/246	119/5494	0.000241223	0.00554812	0.00514185	Seita.2G217100/Seita.3G095700/Seita.3G218600/Seita.4G086600/Seita.4G277200/Seita.5G023200/Seita.5G121900/Seita.5G282300/Seita.5G341700/Seita.6G021900/Seita.7G305300/Seita.8G009400/Seita.9G023200/Seita.9G306400/Seita.9G361200	15
Ci409DEG	sita00592	alpha-Linolenic acid metabolism	18/817	58/5494	0.00132301	0.0145531	0.0116982	Seita.1G122400/Seita.2G271000/Seita.3G070700/Seita.4G077900/Seita.4G078000/Seita.4G078100/Seita.4G078200/Seita.4G144800/Seita.4G156800/Seita.5G169400/Seita.6G205300/Seita.7G110100/Seita.7G113700/Seita.8G099000/Seita.8G099100/Seita.8G180100/Seita.9G122800/Seita.9G483700	18													Ci134down	sita00196	Photosynthesis - antenna proteins	10/247	16/5494	1.78081e-10	1.5493e-08	1.34966e-08	Seita.2G351600/Seita.2G352900/Seita.2G366600/Seita.3G143800/Seita.4G139900/Seita.5G215600/Seita.6G158500/Seita.7G121800/Seita.8G080900/Seita.9G177100	10
Ci409DEG	sita00564	Glycerophospholipid metabolism	30/817	119/5494	0.00195275	0.0195275	0.0156968	Seita.1G116700/Seita.1G171900/Seita.2G207900/Seita.2G271000/Seita.2G381500/Seita.3G159500/Seita.3G188000/Seita.3G218600/Seita.3G291600/Seita.4G086600/Seita.5G028700/Seita.5G261900/Seita.5G280600/Seita.5G282300/Seita.5G299700/Seita.5G340900/Seita.5G341700/Seita.5G386400/Seita.5G467900/Seita.6G225700/Seita.7G077400/Seita.7G253300/Seita.7G305300/Seita.8G009400/Seita.8G170900/Seita.8G196400/Seita.9G0…	30													Ci134down	sita00195	Photosynthesis	19/247	90/5494	1.04298e-08	4.53696e-07	3.95234e-07	Seita.1G217200/Seita.2G031300/Seita.2G117000/Seita.2G248100/Seita.2G330500/Seita.2G356500/Seita.3G184900/Seita.4G000900/Seita.4G207000/Seita.5G172700/Seita.5G336700/Seita.5G446500/Seita.6G005700/Seita.6G032200/Seita.6G082000/Seita.7G092700/Seita.7G279400/Seita.9G069300/Seita.J002400	19
Ci409DEG	sita00910	Nitrogen metabolism	13/817	38/5494	0.00231477	0.0212187	0.0170562	Seita.1G116100/Seita.1G181000/Seita.1G331300/Seita.1G334700/Seita.3G024100/Seita.5G198500/Seita.5G286900/Seita.6G178500/Seita.6G180000/Seita.7G186100/Seita.7G325400/Seita.9G118300/Seita.9G226000	13													Ci134down	sita00500	Starch and sucrose metabolism	25/247	180/5494	3.37346e-07	9.78303e-06	8.52242e-06	Seita.1G323700/Seita.2G188200/Seita.2G235900/Seita.2G270400/Seita.2G342700/Seita.2G343000/Seita.2G396200/Seita.2G422000/Seita.3G176900/Seita.3G270200/Seita.4G065500/Seita.5G056800/Seita.5G384100/Seita.5G429100/Seita.6G090000/Seita.6G120500/Seita.6G141700/Seita.7G134800/Seita.7G164300/Seita.7G181300/Seita.7G243900/Seita.9G091400/Seita.9G091600/Seita.9G102900/Seita.9G532500	25
Ci409DEG	sita00710	Carbon fixation in photosynthetic organisms	22/817	83/5494	0.0039089	0.0330753	0.0265869	Seita.1G071600/Seita.1G086700/Seita.1G221800/Seita.2G137100/Seita.2G265900/Seita.2G401000/Seita.3G109300/Seita.3G247900/Seita.4G119800/Seita.4G267900/Seita.4G268700/Seita.5G301800/Seita.5G314300/Seita.5G324500/Seita.5G377300/Seita.5G381500/Seita.6G251800/Seita.7G046700/Seita.7G286800/Seita.8G050800/Seita.9G251100/Seita.9G458800	22													Ci134down	sita00750	Vitamin B6 metabolism	4/247	12/5494	0.0014828	0.0322509	0.0280952	Seita.1G031100/Seita.5G280800/Seita.9G191500/Seita.J005500	4
Ci409DEG	sita04626	Plant-pathogen interaction	51/817	243/5494	0.00539456	0.0423858	0.0340709	Seita.1G308900/Seita.2G024600/Seita.2G024800/Seita.2G062100/Seita.2G128800/Seita.2G246400/Seita.2G357800/Seita.3G053500/Seita.3G188100/Seita.3G206900/Seita.3G290500/Seita.3G350300/Seita.3G380800/Seita.4G116400/Seita.4G163600/Seita.4G225400/Seita.4G281500/Seita.5G097100/Seita.5G175100/Seita.5G217800/Seita.5G286600/Seita.5G330300/Seita.5G365500/Seita.5G451500/Seita.5G456800/Seita.5G456900/Seita.6G1…	51													Ci603down	sita00196	Photosynthesis - antenna proteins	12/385	16/5494	1.67614e-11	1.6091e-09	1.3762e-09	Seita.2G299200/Seita.2G351600/Seita.2G352900/Seita.2G366600/Seita.3G143800/Seita.4G139900/Seita.4G219400/Seita.5G215600/Seita.6G158500/Seita.7G121800/Seita.8G080900/Seita.9G177100	12
Ci134up	sita00500	Starch and sucrose metabolism	17/172	180/5494	4.00452e-05	0.00332375	0.00303501	Seita.2G168000/Seita.2G237100/Seita.3G133300/Seita.4G099700/Seita.4G101200/Seita.5G134800/Seita.5G313600/Seita.5G334800/Seita.5G429100/Seita.6G022200/Seita.7G088700/Seita.7G091700/Seita.7G243900/Seita.8G083400/Seita.9G229700/Seita.9G410800/Seita.9G416600	17													Ci603down	sita00195	Photosynthesis	25/385	90/5494	1.07779e-09	5.17338e-08	4.4246e-08	Seita.1G217200/Seita.1G321900/Seita.2G031300/Seita.2G117000/Seita.2G330500/Seita.2G356500/Seita.3G149000/Seita.3G184900/Seita.3G304000/Seita.4G207000/Seita.5G172700/Seita.5G336700/Seita.5G395300/Seita.5G446500/Seita.6G005700/Seita.6G032200/Seita.6G082000/Seita.7G092700/Seita.7G279400/Seita.9G045100/Seita.9G069300/Seita.9G414200/Seita.9G450200/Seita.9G561800/Seita.J002400	25
Ci134up	sita00052	Galactose metabolism	9/172	65/5494	0.000165609	0.00687276	0.00627569	Seita.2G081000/Seita.3G119400/Seita.5G119800/Seita.5G134800/Seita.5G313600/Seita.7G091700/Seita.8G228200/Seita.9G043300/Seita.9G208200	9													Ci603down	sita00500	Starch and sucrose metabolism	35/385	180/5494	1.75818e-08	5.62617e-07	4.81186e-07	Seita.1G262000/Seita.1G318200/Seita.1G323700/Seita.2G112500/Seita.2G188200/Seita.2G235900/Seita.2G342700/Seita.2G343000/Seita.2G422000/Seita.3G176900/Seita.3G270200/Seita.3G281600/Seita.4G065500/Seita.4G139700/Seita.5G056800/Seita.5G313600/Seita.5G318400/Seita.5G384100/Seita.5G429100/Seita.5G447800/Seita.6G118900/Seita.6G120500/Seita.7G088700/Seita.7G164300/Seita.7G164500/Seita.7G181300/Seita.7G2…	35
Ci134up	sita00250	Alanine, aspartate and glutamate metabolism	7/172	55/5494	0.00148923	0.0412021	0.0376227	Seita.1G069500/Seita.3G165100/Seita.6G177000/Seita.7G115400/Seita.7G236000/Seita.7G264800/Seita.9G118300	7													Ci603down	sita00710	Carbon fixation in photosynthetic organisms	20/385	83/5494	6.70224e-07	1.60854e-05	1.37572e-05	Seita.2G137100/Seita.2G288000/Seita.2G401000/Seita.3G192600/Seita.3G269600/Seita.3G284800/Seita.3G312000/Seita.3G312200/Seita.3G312400/Seita.4G119800/Seita.4G175200/Seita.4G177400/Seita.5G074200/Seita.5G134300/Seita.7G046700/Seita.7G123400/Seita.7G286800/Seita.8G050800/Seita.9G251000/Seita.9G554700	20
Ci134up	sita00650	Butanoate metabolism	5/172	30/5494	0.00214109	0.0444277	0.0405681	Seita.1G069500/Seita.6G177000/Seita.7G115400/Seita.7G236000/Seita.9G564900	5													Ci603down	sita00860	Porphyrin and chlorophyll metabolism	13/385	51/5494	3.29306e-05	0.000632268	0.000540756	Seita.1G225800/Seita.1G318400/Seita.3G001500/Seita.3G014700/Seita.4G022100/Seita.4G271200/Seita.5G033900/Seita.5G040100/Seita.5G461800/Seita.7G217800/Seita.7G290300/Seita.9G041600/Seita.9G201900	13
Ci603up	sita00500	Starch and sucrose metabolism	30/318	180/5494	9.55766e-08	8.88862e-06	8.24977e-06	Seita.1G179000/Seita.2G168000/Seita.2G237100/Seita.2G342900/Seita.2G366300/Seita.2G398700/Seita.3G133300/Seita.3G253500/Seita.4G191200/Seita.4G286200/Seita.5G134800/Seita.5G237300/Seita.5G313600/Seita.5G334800/Seita.5G356600/Seita.5G429100/Seita.6G022200/Seita.6G118900/Seita.7G088700/Seita.7G091700/Seita.7G164200/Seita.7G164400/Seita.7G164500/Seita.8G083400/Seita.9G085600/Seita.9G101500/Seita.9G3…	30													Ci603down	sita00010	Glycolysis / Gluconeogenesis	24/385	165/5494	0.000440568	0.00632569	0.00541013	Seita.1G253300/Seita.2G178200/Seita.2G235900/Seita.2G288000/Seita.3G023100/Seita.3G111200/Seita.3G192600/Seita.3G219400/Seita.4G025700/Seita.5G156300/Seita.5G313600/Seita.5G359900/Seita.5G447800/Seita.6G162900/Seita.7G123000/Seita.7G226400/Seita.7G286800/Seita.7G315100/Seita.7G315200/Seita.8G050800/Seita.8G099000/Seita.9G118400/Seita.9G284800/Seita.9G284900	24
Ci603up	sita04075	Plant hormone signal transduction	33/318	267/5494	2.19895e-05	0.00102251	0.000949022	Seita.1G333600/Seita.1G356800/Seita.2G058900/Seita.2G177500/Seita.2G229500/Seita.2G426000/Seita.2G439900/Seita.3G109200/Seita.3G139000/Seita.3G147000/Seita.3G164700/Seita.3G218800/Seita.3G230400/Seita.4G050700/Seita.4G060600/Seita.4G082000/Seita.4G161100/Seita.4G226200/Seita.5G126200/Seita.5G257700/Seita.5G314500/Seita.5G393800/Seita.5G395400/Seita.5G419200/Seita.6G005300/Seita.6G009300/Seita.6G1…	33													Ci603down	sita00052	Galactose metabolism	13/385	65/5494	0.000461248	0.00632569	0.00541013	Seita.2G176100/Seita.2G282600/Seita.3G111200/Seita.4G242100/Seita.5G119800/Seita.5G313600/Seita.5G447800/Seita.6G130900/Seita.6G195300/Seita.7G123000/Seita.7G181300/Seita.9G118400/Seita.9G207800	13
Ci603up	sita00052	Galactose metabolism	12/318	65/5494	0.000287337	0.00890744	0.00826724	Seita.2G081000/Seita.2G432600/Seita.2G438500/Seita.5G119800/Seita.5G134800/Seita.5G313600/Seita.7G091700/Seita.7G132000/Seita.8G228200/Seita.9G043300/Seita.9G208200/Seita.9G424800	12													Ci603down	sita00750	Vitamin B6 metabolism	5/385	12/5494	0.000863607	0.0103633	0.00886333	Seita.1G031100/Seita.5G280800/Seita.9G191500/Seita.9G568400/Seita.J005500	5
Ci603up	sita00906	Carotenoid biosynthesis	8/318	37/5494	0.00101576	0.0236165	0.0219191	Seita.2G042900/Seita.2G104900/Seita.2G105100/Seita.2G229900/Seita.2G303000/Seita.3G391000/Seita.7G116400/Seita.7G209000	8													Ci603down	sita00460	Cyanoamino acid metabolism	14/385	81/5494	0.00130463	0.0139161	0.0119019	Seita.1G245800/Seita.1G245900/Seita.3G270200/Seita.3G281600/Seita.4G139700/Seita.4G236300/Seita.5G056800/Seita.6G118900/Seita.7G164300/Seita.7G164500/Seita.8G115500/Seita.9G091400/Seita.9G091600/Seita.9G125400	14
Ci603up	sita04016	MAPK signaling pathway - plant	20/318	167/5494	0.0014235	0.0264771	0.0245741	Seita.1G117500/Seita.1G295400/Seita.2G177500/Seita.3G139000/Seita.3G164200/Seita.3G164700/Seita.3G218800/Seita.3G230400/Seita.4G286000/Seita.5G257700/Seita.5G354700/Seita.5G395400/Seita.6G005300/Seita.6G056700/Seita.7G021400/Seita.7G121700/Seita.7G193900/Seita.9G169200/Seita.9G379000/Seita.9G551200	20													Ci603down	sita00941	Flavonoid biosynthesis	9/385	44/5494	0.00291503	0.0279842	0.0239339	Seita.1G230100/Seita.1G332100/Seita.3G026900/Seita.5G100900/Seita.5G101100/Seita.7G249600/Seita.7G301600/Seita.9G034700/Seita.9G242900	9
Ci603up	sita00030	Pentose phosphate pathway	10/318	60/5494	0.00207093	0.0320994	0.0297923	Seita.1G295200/Seita.2G382400/Seita.4G141400/Seita.4G215100/Seita.5G381500/Seita.6G162900/Seita.7G132000/Seita.7G286800/Seita.9G363900/Seita.9G424300	10													Ci603down	sita00561	Glycerolipid metabolism	15/385	101/5494	0.00417357	0.0364238	0.031152	Seita.1G253300/Seita.2G196800/Seita.2G209700/Seita.3G210000/Seita.3G219400/Seita.5G236200/Seita.5G327000/Seita.7G094100/Seita.8G234000/Seita.8G237500/Seita.9G023200/Seita.9G114100/Seita.9G207800/Seita.9G460000/Seita.J005600	15
Ci328up	sita04141	Protein processing in endoplasmic reticulum	28/308	217/5494	2.43507e-05	0.00231331	0.00202495	Seita.1G000400/Seita.1G032700/Seita.1G045200/Seita.1G101200/Seita.1G293800/Seita.1G326600/Seita.1G342400/Seita.3G216900/Seita.3G271000/Seita.4G089400/Seita.4G111400/Seita.5G092400/Seita.5G092700/Seita.5G093000/Seita.5G131300/Seita.5G131400/Seita.5G336600/Seita.5G376100/Seita.6G122600/Seita.7G009200/Seita.7G111700/Seita.8G079900/Seita.9G120300/Seita.9G451500/Seita.9G458200/Seita.9G458700/Seita.9G4…	28													Ci328down	sita00196	Photosynthesis - antenna proteins	11/354	16/5494	2.2314e-10	2.20908e-08	1.99651e-08	Seita.2G217800/Seita.2G351600/Seita.2G352900/Seita.2G366600/Seita.4G139900/Seita.4G219400/Seita.5G215600/Seita.6G158500/Seita.7G121800/Seita.8G080900/Seita.9G177100	11
Ci328up	sita00480	Glutathione metabolism	19/308	141/5494	0.000290846	0.0128355	0.0112355	Seita.1G192100/Seita.2G178900/Seita.2G406500/Seita.3G060800/Seita.5G047800/Seita.5G169900/Seita.5G279900/Seita.5G452100/Seita.6G153400/Seita.6G210000/Seita.7G023900/Seita.7G225300/Seita.9G064400/Seita.9G121000/Seita.9G262500/Seita.9G351000/Seita.9G424300/Seita.9G446300/Seita.9G446400	19													Ci328down	sita00195	Photosynthesis	24/354	90/5494	1.05626e-09	5.22847e-08	4.72536e-08	Seita.1G016500/Seita.1G208500/Seita.2G031300/Seita.2G117000/Seita.2G248100/Seita.2G330500/Seita.2G356500/Seita.3G149000/Seita.3G184900/Seita.3G304000/Seita.4G000900/Seita.4G207000/Seita.5G172700/Seita.5G336700/Seita.6G005700/Seita.6G032200/Seita.6G082000/Seita.7G092700/Seita.7G279400/Seita.9G069300/Seita.J002400/Seita.J011100/Seita.J017900/Seita.J019900	24
Ci328up	sita00500	Starch and sucrose metabolism	22/308	180/5494	0.000405333	0.0128355	0.0112355	Seita.2G168000/Seita.2G237100/Seita.3G109600/Seita.3G133300/Seita.4G191200/Seita.4G286200/Seita.5G134800/Seita.5G313600/Seita.5G334800/Seita.5G429100/Seita.6G022200/Seita.6G118900/Seita.7G088700/Seita.7G164500/Seita.7G243900/Seita.8G083400/Seita.9G085600/Seita.9G229700/Seita.9G389200/Seita.9G410800/Seita.9G416600/Seita.9G544600	22													Ci328down	sita00940	Phenylpropanoid biosynthesis	40/354	282/5494	1.23587e-06	4.07836e-05	3.68592e-05	Seita.1G023000/Seita.1G023100/Seita.1G230100/Seita.2G004800/Seita.2G371600/Seita.2G415300/Seita.2G431300/Seita.2G431400/Seita.2G431500/Seita.3G005200/Seita.3G052400/Seita.3G270000/Seita.3G281600/Seita.4G047600/Seita.4G135100/Seita.4G139700/Seita.4G176600/Seita.5G029700/Seita.5G035700/Seita.5G046600/Seita.5G056800/Seita.5G122000/Seita.5G174100/Seita.5G263000/Seita.5G356600/Seita.5G356800/Seita.7G1…	40
Ci328up	sita00052	Galactose metabolism	11/308	65/5494	0.000844968	0.020068	0.0175664	Seita.2G081000/Seita.2G438500/Seita.3G109600/Seita.5G119800/Seita.5G134800/Seita.5G313600/Seita.7G132000/Seita.8G228200/Seita.9G043300/Seita.9G208200/Seita.9G424800	11													Ci328down	sita00531	Glycosaminoglycan degradation	6/354	17/5494	0.000461809	0.0114298	0.0103299	Seita.1G354100/Seita.3G364800/Seita.4G053700/Seita.5G440300/Seita.5G440400/Seita.9G487800	6
Ci328up	sita00650	Butanoate metabolism	7/308	30/5494	0.00108071	0.0205334	0.0179739	Seita.1G069500/Seita.5G047000/Seita.6G111400/Seita.6G128400/Seita.6G177000/Seita.7G115400/Seita.9G431600	7													Ci409down	sita00195	Photosynthesis	30/365	90/5494	2.53271e-14	2.4314e-12	2.31943e-12	Seita.1G003200/Seita.1G016500/Seita.1G208500/Seita.1G217200/Seita.1G321900/Seita.2G031300/Seita.2G117000/Seita.2G248100/Seita.2G330500/Seita.2G356500/Seita.3G149000/Seita.3G184900/Seita.3G304000/Seita.4G207000/Seita.5G172700/Seita.5G336700/Seita.5G446500/Seita.6G005700/Seita.6G032200/Seita.6G082000/Seita.7G092700/Seita.7G279400/Seita.9G045100/Seita.9G069300/Seita.9G149700/Seita.9G414200/Seita.9G4…	30
Ci409up	sita00052	Galactose metabolism	11/272	65/5494	0.000293669	0.0159416	0.0144094	Seita.2G081000/Seita.2G438500/Seita.3G119400/Seita.5G119800/Seita.5G134800/Seita.5G313600/Seita.7G132000/Seita.8G228200/Seita.9G043300/Seita.9G208200/Seita.9G424800	11													Ci409down	sita00196	Photosynthesis - antenna proteins	13/365	16/5494	1.86909e-13	8.97163e-12	8.55846e-12	Seita.1G330600/Seita.2G217800/Seita.2G351600/Seita.2G352900/Seita.2G366600/Seita.3G143800/Seita.4G139900/Seita.4G219400/Seita.5G215600/Seita.6G158500/Seita.7G121800/Seita.8G080900/Seita.9G177100	13
Ci409up	sita00910	Nitrogen metabolism	8/272	38/5494	0.000434502	0.0159416	0.0144094	Seita.1G116100/Seita.1G331300/Seita.1G334700/Seita.3G024100/Seita.5G198500/Seita.7G325400/Seita.9G118300/Seita.9G226000	8													Ci409down	sita00710	Carbon fixation in photosynthetic organisms	23/365	83/5494	1.90136e-09	6.08435e-08	5.80415e-08	Seita.1G283800/Seita.2G051000/Seita.2G288000/Seita.3G192600/Seita.3G219800/Seita.3G227500/Seita.3G269500/Seita.3G269600/Seita.3G312000/Seita.3G312200/Seita.3G312400/Seita.4G023100/Seita.4G119800/Seita.4G175200/Seita.5G074200/Seita.5G381500/Seita.5G384700/Seita.7G046700/Seita.7G123400/Seita.7G286800/Seita.8G050800/Seita.9G458800/Seita.9G554700	23
Ci409up	sita00500	Starch and sucrose metabolism	20/272	180/5494	0.000519835	0.0159416	0.0144094	Seita.1G098500/Seita.2G168000/Seita.2G237100/Seita.2G386000/Seita.3G133300/Seita.4G191200/Seita.5G134800/Seita.5G313600/Seita.5G334800/Seita.5G429100/Seita.6G022200/Seita.6G141700/Seita.7G088700/Seita.7G243900/Seita.8G083400/Seita.9G229700/Seita.9G389200/Seita.9G410800/Seita.9G416600/Seita.9G544600	20													Ci409down	sita00860	Porphyrin and chlorophyll metabolism	12/365	51/5494	9.17527e-05	0.00220206	0.00210065	Seita.1G318400/Seita.3G001500/Seita.3G014700/Seita.4G022100/Seita.5G033900/Seita.5G040100/Seita.7G217800/Seita.7G232700/Seita.7G290300/Seita.9G041600/Seita.9G152400/Seita.9G201900	12
Ci409up	sita04075	Plant hormone signal transduction	25/272	267/5494	0.00141857	0.0326271	0.0294913	Seita.2G177500/Seita.2G229500/Seita.2G267500/Seita.2G426000/Seita.2G437500/Seita.3G139000/Seita.3G147000/Seita.3G164700/Seita.3G218800/Seita.3G224800/Seita.3G230400/Seita.4G050700/Seita.4G082000/Seita.4G246300/Seita.5G257700/Seita.5G265200/Seita.5G393800/Seita.5G395400/Seita.5G419200/Seita.6G005300/Seita.6G180900/Seita.7G021400/Seita.7G108800/Seita.7G121700/Seita.9G379000	25													Ci409down	sita00030	Pentose phosphate pathway	13/365	60/5494	0.000116859	0.00224369	0.00214037	Seita.2G051000/Seita.3G111200/Seita.3G219800/Seita.3G227500/Seita.4G023100/Seita.5G381500/Seita.5G437000/Seita.7G046700/Seita.7G286800/Seita.8G050800/Seita.9G365500/Seita.9G458800/Seita.9G580300	13
Ci134down	sita00940	Phenylpropanoid biosynthesis	67/439	282/5494	3.8601e-17	4.0531e-15	3.49441e-15	Seita.1G022400/Seita.1G079000/Seita.1G170300/Seita.1G240400/Seita.1G240600/Seita.1G281400/Seita.2G147600/Seita.2G254000/Seita.2G320200/Seita.2G371600/Seita.2G406600/Seita.2G407100/Seita.2G407300/Seita.2G407600/Seita.2G430900/Seita.2G431500/Seita.2G431600/Seita.3G004800/Seita.3G022600/Seita.3G052900/Seita.3G053000/Seita.3G190400/Seita.3G234900/Seita.3G235000/Seita.3G270300/Seita.3G347500/Seita.4G1…	67
Ci134down	sita00904	Diterpenoid biosynthesis	13/439	35/5494	1.30988e-06	6.87689e-05	5.92895e-05	Seita.2G144900/Seita.2G145800/Seita.2G145900/Seita.4G235500/Seita.4G235600/Seita.5G157700/Seita.5G323400/Seita.5G404900/Seita.6G023100/Seita.6G100500/Seita.6G101900/Seita.8G166500/Seita.9G004400	13
Ci134down	sita00480	Glutathione metabolism	28/439	141/5494	4.50853e-06	0.000157798	0.000136047	Seita.1G166500/Seita.2G033200/Seita.2G033500/Seita.2G444500/Seita.3G038400/Seita.3G038600/Seita.3G038700/Seita.4G232000/Seita.4G241000/Seita.5G104100/Seita.5G452900/Seita.5G453400/Seita.5G453500/Seita.8G008300/Seita.8G040400/Seita.9G157600/Seita.9G338500/Seita.9G345600/Seita.9G345700/Seita.9G345900/Seita.9G346100/Seita.9G346200/Seita.9G346400/Seita.9G346800/Seita.9G346900/Seita.9G347000/Seita.9G3…	28
Ci134down	sita00960	Tropane, piperidine and pyridine alkaloid biosynthesis	9/439	29/5494	0.00028803	0.00756079	0.00651858	Seita.1G216100/Seita.2G361800/Seita.4G177400/Seita.5G440100/Seita.8G149600/Seita.8G150700/Seita.8G216400/Seita.8G216500/Seita.8G252100	9
Ci134down	sita00350	Tyrosine metabolism	13/439	59/5494	0.000606391	0.0116767	0.0100672	Seita.1G216100/Seita.2G361800/Seita.3G096900/Seita.3G097200/Seita.4G177400/Seita.4G215500/Seita.8G099000/Seita.8G149600/Seita.8G150700/Seita.8G209800/Seita.9G284900/Seita.9G510900/Seita.9G511000	13
Ci134down	sita04016	MAPK signaling pathway - plant	26/439	167/5494	0.000667242	0.0116767	0.0100672	Seita.1G013900/Seita.1G144700/Seita.2G024600/Seita.2G039200/Seita.2G138400/Seita.2G194500/Seita.3G003200/Seita.3G007100/Seita.3G206900/Seita.4G163600/Seita.4G239500/Seita.4G286000/Seita.5G175100/Seita.5G284600/Seita.5G365500/Seita.6G120000/Seita.6G120100/Seita.7G100500/Seita.7G194000/Seita.7G239900/Seita.8G176000/Seita.9G097000/Seita.9G339100/Seita.9G427100/Seita.9G437300/Seita.9G500100	26
Ci134down	sita00500	Starch and sucrose metabolism	27/439	180/5494	0.000952572	0.0142886	0.012319	Seita.1G112800/Seita.1G323700/Seita.1G339700/Seita.1G378600/Seita.2G254000/Seita.2G315900/Seita.2G396200/Seita.3G017300/Seita.3G059500/Seita.4G041500/Seita.4G114200/Seita.4G139700/Seita.4G255800/Seita.4G288800/Seita.5G019600/Seita.5G022400/Seita.5G356800/Seita.6G144600/Seita.6G166700/Seita.7G091600/Seita.7G134900/Seita.7G181300/Seita.8G179800/Seita.9G091600/Seita.9G125400/Seita.9G350600/Seita.9G3…	27
Ci134down	sita00531	Glycosaminoglycan degradation	6/439	17/5494	0.00145298	0.0190703	0.0164416	Seita.1G354100/Seita.2G365000/Seita.4G053700/Seita.5G440300/Seita.5G440400/Seita.9G399100	6
Ci603down	sita00940	Phenylpropanoid biosynthesis	98/698	282/5494	6.14655e-23	6.57681e-21	4.91724e-21	Seita.1G022300/Seita.1G022400/Seita.1G023000/Seita.1G062400/Seita.1G098300/Seita.1G240300/Seita.1G240500/Seita.1G240600/Seita.1G281400/Seita.2G010900/Seita.2G371600/Seita.2G407100/Seita.2G407300/Seita.2G408600/Seita.2G430900/Seita.2G431300/Seita.2G431500/Seita.2G431600/Seita.3G004800/Seita.3G004900/Seita.3G005000/Seita.3G005200/Seita.3G052900/Seita.3G053000/Seita.3G053100/Seita.3G190400/Seita.3G2…	98
Ci603down	sita04626	Plant-pathogen interaction	58/698	243/5494	7.4156e-07	3.70146e-05	2.76745e-05	Seita.1G042400/Seita.1G102100/Seita.1G345400/Seita.2G024800/Seita.2G062100/Seita.2G246400/Seita.2G357800/Seita.3G053500/Seita.3G135500/Seita.3G142500/Seita.3G206900/Seita.3G290500/Seita.3G350300/Seita.3G380800/Seita.4G163600/Seita.4G206600/Seita.4G281500/Seita.4G284200/Seita.5G231500/Seita.5G286600/Seita.5G294600/Seita.5G330300/Seita.5G365500/Seita.5G456800/Seita.5G456900/Seita.6G120000/Seita.6G1…	58
Ci603down	sita00910	Nitrogen metabolism	17/698	38/5494	1.03779e-06	3.70146e-05	2.76745e-05	Seita.1G114900/Seita.1G115700/Seita.1G115800/Seita.1G116000/Seita.1G116100/Seita.1G181000/Seita.1G212900/Seita.1G311400/Seita.2G235500/Seita.3G024100/Seita.5G198500/Seita.5G240000/Seita.5G240100/Seita.5G286900/Seita.6G178500/Seita.6G179900/Seita.6G180000	17
Ci603down	sita00531	Glycosaminoglycan degradation	10/698	17/5494	8.64852e-06	0.000231348	0.00017297	Seita.1G354100/Seita.2G365000/Seita.3G240700/Seita.4G053700/Seita.5G409400/Seita.5G440300/Seita.5G440400/Seita.7G265200/Seita.8G078700/Seita.9G399100	10
Ci603down	sita00010	Glycolysis / Gluconeogenesis	41/698	165/5494	1.16778e-05	0.000249906	0.000186845	Seita.1G071600/Seita.1G177400/Seita.1G221800/Seita.1G307000/Seita.1G314800/Seita.1G322900/Seita.2G167900/Seita.2G191000/Seita.2G394300/Seita.3G111200/Seita.3G192600/Seita.3G227500/Seita.3G391300/Seita.4G093100/Seita.5G135500/Seita.5G158800/Seita.5G377300/Seita.5G380500/Seita.6G156600/Seita.7G122800/Seita.7G122900/Seita.7G123000/Seita.7G123100/Seita.7G268900/Seita.7G281700/Seita.7G315100/Seita.7G3…	41
Ci603down	sita00480	Glutathione metabolism	36/698	141/5494	2.12018e-05	0.000378099	0.000282691	Seita.1G166500/Seita.1G221400/Seita.2G033200/Seita.2G033500/Seita.2G293400/Seita.2G444500/Seita.3G038600/Seita.3G038700/Seita.4G232000/Seita.4G241000/Seita.5G104100/Seita.5G442000/Seita.5G452900/Seita.5G453000/Seita.5G453200/Seita.5G453400/Seita.5G453500/Seita.7G116100/Seita.7G122100/Seita.7G153200/Seita.8G040400/Seita.8G106200/Seita.9G121100/Seita.9G157600/Seita.9G261500/Seita.9G345500/Seita.9G3…	36
Ci603down	sita00592	alpha-Linolenic acid metabolism	18/698	58/5494	0.000189938	0.00271318	0.00202855	Seita.1G122400/Seita.3G070700/Seita.4G065000/Seita.4G077800/Seita.4G077900/Seita.4G078000/Seita.4G078100/Seita.4G078200/Seita.4G144800/Seita.6G205300/Seita.7G109800/Seita.7G110100/Seita.7G113700/Seita.7G267400/Seita.8G180100/Seita.9G122800/Seita.9G357200/Seita.9G483700	18
Ci603down	sita00904	Diterpenoid biosynthesis	13/698	35/5494	0.000202855	0.00271318	0.00202855	Seita.2G144900/Seita.2G145800/Seita.2G145900/Seita.4G235500/Seita.5G157700/Seita.5G323400/Seita.5G404900/Seita.6G023100/Seita.6G089500/Seita.6G100500/Seita.8G166500/Seita.9G004400/Seita.9G262400	13
Ci603down	sita00061	Fatty acid biosynthesis	17/698	57/5494	0.000481308	0.00543819	0.00406593	Seita.1G166400/Seita.1G167200/Seita.2G108900/Seita.3G051400/Seita.4G040200/Seita.4G067400/Seita.4G256200/Seita.6G021700/Seita.6G113700/Seita.6G255800/Seita.7G030200/Seita.7G259500/Seita.7G334200/Seita.8G028000/Seita.8G049100/Seita.9G234600/Seita.9G437400	17
Ci603down	sita00960	Tropane, piperidine and pyridine alkaloid biosynthesis	11/698	29/5494	0.000508242	0.00543819	0.00406593	Seita.1G216100/Seita.2G361800/Seita.3G231000/Seita.5G440100/Seita.8G149600/Seita.8G150700/Seita.8G216400/Seita.8G216500/Seita.8G216600/Seita.8G217200/Seita.8G252100	11
Ci603down	sita02010	ABC transporters	12/698	37/5494	0.00144165	0.0140234	0.0104847	Seita.1G055700/Seita.1G190900/Seita.3G159900/Seita.5G031800/Seita.5G163300/Seita.5G283000/Seita.5G283500/Seita.5G283600/Seita.6G060300/Seita.7G029100/Seita.7G040200/Seita.7G140300	12
Ci603down	sita00920	Sulfur metabolism	11/698	36/5494	0.00382402	0.0340975	0.0254935	Seita.1G035300/Seita.1G076100/Seita.1G357600/Seita.3G397200/Seita.4G074600/Seita.4G074900/Seita.5G262900/Seita.7G020900/Seita.7G096600/Seita.9G255100/Seita.9G255300	11
Ci603down	sita00071	Fatty acid degradation	14/698	53/5494	0.00515425	0.0424234	0.0317185	Seita.1G122400/Seita.1G307000/Seita.2G394300/Seita.3G051400/Seita.3G170100/Seita.4G065000/Seita.4G067400/Seita.5G386300/Seita.7G267400/Seita.8G028000/Seita.8G049100/Seita.9G284800/Seita.9G510900/Seita.9G511000	14
Ci603down	sita00350	Tyrosine metabolism	15/698	59/5494	0.00567593	0.0433804	0.0324339	Seita.1G216100/Seita.2G361800/Seita.2G394300/Seita.3G096900/Seita.3G097200/Seita.3G231000/Seita.4G215500/Seita.6G067600/Seita.6G067700/Seita.8G149600/Seita.8G150700/Seita.9G256000/Seita.9G284800/Seita.9G510900/Seita.9G511000	15
Ci603down	sita00620	Pyruvate metabolism	24/698	113/5494	0.00700374	0.04996	0.0373533	Seita.1G177400/Seita.1G307000/Seita.1G314800/Seita.2G394300/Seita.3G391300/Seita.5G134300/Seita.5G158800/Seita.5G301800/Seita.5G324500/Seita.5G380500/Seita.6G156600/Seita.7G030200/Seita.7G268900/Seita.7G281700/Seita.8G026900/Seita.9G027100/Seita.9G073100/Seita.9G143700/Seita.9G284800/Seita.9G314300/Seita.9G431700/Seita.9G465500/Seita.9G510900/Seita.9G511000	24
Ci328down	sita00940	Phenylpropanoid biosynthesis	90/639	282/5494	6.0988e-21	6.28177e-19	5.00744e-19	Seita.1G022400/Seita.1G023000/Seita.1G062400/Seita.1G079000/Seita.1G157600/Seita.1G230100/Seita.1G240500/Seita.1G240600/Seita.1G281400/Seita.1G349500/Seita.2G208600/Seita.2G254100/Seita.2G320200/Seita.2G406600/Seita.2G407100/Seita.2G407300/Seita.2G407500/Seita.2G407600/Seita.2G430900/Seita.2G431500/Seita.2G431600/Seita.3G004800/Seita.3G004900/Seita.3G005000/Seita.3G005200/Seita.3G052400/Seita.3G0…	90
Ci328down	sita00531	Glycosaminoglycan degradation	11/639	17/5494	3.10853e-07	1.60089e-05	1.27613e-05	Seita.1G354100/Seita.2G365000/Seita.3G240700/Seita.3G364800/Seita.4G053700/Seita.5G409400/Seita.5G440300/Seita.5G440400/Seita.7G265200/Seita.8G078700/Seita.9G399100	11
Ci328down	sita04626	Plant-pathogen interaction	54/639	243/5494	1.17862e-06	4.0466e-05	3.2257e-05	Seita.1G102100/Seita.1G345400/Seita.2G024600/Seita.2G128800/Seita.2G246400/Seita.2G357800/Seita.3G053500/Seita.3G079700/Seita.3G135500/Seita.3G137500/Seita.3G142500/Seita.3G170600/Seita.3G206900/Seita.3G261400/Seita.3G282000/Seita.3G290500/Seita.3G350300/Seita.3G380800/Seita.4G206600/Seita.5G097100/Seita.5G175100/Seita.5G217800/Seita.5G294600/Seita.5G330300/Seita.5G365500/Seita.5G456800/Seita.5G4…	54
Ci328down	sita00904	Diterpenoid biosynthesis	14/639	35/5494	1.61051e-05	0.000414706	0.000330578	Seita.2G144900/Seita.2G145800/Seita.2G145900/Seita.4G235500/Seita.4G235600/Seita.5G157700/Seita.5G323400/Seita.5G404900/Seita.6G023100/Seita.6G089500/Seita.6G100500/Seita.8G166500/Seita.9G004400/Seita.9G262400	14
Ci328down	sita00520	Amino sugar and nucleotide sugar metabolism	37/639	161/5494	2.7372e-05	0.000563864	0.000449478	Seita.1G112800/Seita.1G225300/Seita.2G107300/Seita.2G247400/Seita.2G365000/Seita.2G382900/Seita.2G429400/Seita.2G435100/Seita.3G011800/Seita.3G240700/Seita.3G271400/Seita.3G337900/Seita.5G029100/Seita.5G087000/Seita.5G278700/Seita.5G389800/Seita.5G389900/Seita.5G390000/Seita.5G390100/Seita.5G409400/Seita.5G467000/Seita.6G060000/Seita.6G090000/Seita.6G105300/Seita.6G219700/Seita.7G150100/Seita.7G1…	37
Ci328down	sita04075	Plant hormone signal transduction	53/639	267/5494	4.65641e-05	0.00079935	0.000637193	Seita.1G050400/Seita.1G170700/Seita.1G345400/Seita.2G024600/Seita.2G138400/Seita.2G200400/Seita.2G216400/Seita.2G217500/Seita.2G231300/Seita.2G375300/Seita.2G388400/Seita.3G109400/Seita.3G128200/Seita.3G173700/Seita.3G189100/Seita.3G207900/Seita.3G379400/Seita.4G026700/Seita.4G266100/Seita.5G033700/Seita.5G175100/Seita.5G268600/Seita.5G329500/Seita.5G342900/Seita.5G387200/Seita.5G436800/Seita.5G4…	53
Ci328down	sita00350	Tyrosine metabolism	17/639	59/5494	0.000262353	0.00386034	0.00307722	Seita.1G216100/Seita.2G361800/Seita.2G394300/Seita.2G394400/Seita.3G096900/Seita.3G097200/Seita.3G231000/Seita.4G177400/Seita.4G215500/Seita.6G067600/Seita.6G067700/Seita.8G149600/Seita.8G150700/Seita.8G209800/Seita.9G256000/Seita.9G510900/Seita.9G511000	17
Ci328down	sita00950	Isoquinoline alkaloid biosynthesis	11/639	32/5494	0.000624455	0.00803986	0.00640888	Seita.1G216100/Seita.2G361800/Seita.3G231000/Seita.4G177400/Seita.4G215500/Seita.6G067600/Seita.6G067700/Seita.8G149600/Seita.8G150700/Seita.8G209800/Seita.9G256000	11
Ci328down	sita00941	Flavonoid biosynthesis	13/639	44/5494	0.00105816	0.0103755	0.00827075	Seita.1G157600/Seita.1G230100/Seita.1G349500/Seita.2G208600/Seita.6G164300/Seita.7G036600/Seita.7G036700/Seita.7G047600/Seita.7G249600/Seita.7G301600/Seita.8G140200/Seita.9G034700/Seita.9G244600	13
Ci328down	sita00960	Tropane, piperidine and pyridine alkaloid biosynthesis	10/639	29/5494	0.00107104	0.0103755	0.00827075	Seita.1G216100/Seita.2G361800/Seita.3G231000/Seita.4G177400/Seita.5G440100/Seita.8G149600/Seita.8G150700/Seita.8G216400/Seita.8G216500/Seita.8G252100	10
Ci328down	sita00010	Glycolysis / Gluconeogenesis	33/639	165/5494	0.00110807	0.0103755	0.00827075	Seita.1G004400/Seita.1G221800/Seita.1G253300/Seita.1G307000/Seita.1G314800/Seita.1G322900/Seita.2G394300/Seita.2G394400/Seita.3G111200/Seita.3G140600/Seita.3G227500/Seita.3G247900/Seita.3G391300/Seita.4G093100/Seita.5G158800/Seita.5G377200/Seita.5G377300/Seita.5G380500/Seita.6G156600/Seita.7G122800/Seita.7G122900/Seita.7G123000/Seita.7G268900/Seita.7G281700/Seita.7G315100/Seita.8G024300/Seita.9G0…	33
Ci328down	sita00073	Cutin, suberine and wax biosynthesis	11/639	37/5494	0.00240284	0.0190284	0.0151683	Seita.1G265100/Seita.1G310900/Seita.2G132800/Seita.4G260400/Seita.5G386300/Seita.5G434700/Seita.6G243900/Seita.6G244000/Seita.7G197000/Seita.8G128800/Seita.9G214500	11
Ci328down	sita00780	Biotin metabolism	9/639	27/5494	0.00248453	0.0190284	0.0151683	Seita.1G166400/Seita.1G349400/Seita.2G159500/Seita.2G389400/Seita.4G040200/Seita.4G256200/Seita.6G021700/Seita.6G113700/Seita.6G255800	9
Ci328down	sita00500	Starch and sucrose metabolism	34/639	180/5494	0.00258639	0.0190284	0.0151683	Seita.1G112800/Seita.1G262000/Seita.1G323700/Seita.1G339700/Seita.1G378600/Seita.2G188200/Seita.2G254100/Seita.2G315900/Seita.2G396200/Seita.3G011400/Seita.3G017300/Seita.3G059500/Seita.4G041500/Seita.4G092100/Seita.4G139700/Seita.4G255800/Seita.4G263300/Seita.5G019600/Seita.5G022400/Seita.5G318400/Seita.5G356600/Seita.5G356800/Seita.6G090000/Seita.7G109100/Seita.7G134900/Seita.7G135200/Seita.7G1…	34
Ci328down	sita00360	Phenylalanine metabolism	13/639	49/5494	0.00309231	0.0212339	0.0169263	Seita.1G216100/Seita.1G240500/Seita.1G240600/Seita.2G361800/Seita.3G231000/Seita.4G177400/Seita.6G067600/Seita.6G067700/Seita.8G149600/Seita.8G150700/Seita.8G209800/Seita.9G256000/Seita.9G286700	13
Ci328down	sita00130	Ubiquinone and other terpenoid-quinone biosynthesis	14/639	55/5494	0.00329919	0.0212385	0.01693	Seita.1G157600/Seita.2G000200/Seita.3G054900/Seita.3G055000/Seita.4G190800/Seita.4G191500/Seita.5G416900/Seita.6G093400/Seita.8G149600/Seita.8G150700/Seita.9G133200/Seita.9G184200/Seita.9G231800/Seita.9G306300	14
Ci328down	sita04016	MAPK signaling pathway - plant	31/639	167/5494	0.00514021	0.0311436	0.0248258	Seita.1G345400/Seita.2G024600/Seita.2G039200/Seita.2G138400/Seita.2G194500/Seita.3G160800/Seita.3G170600/Seita.3G206900/Seita.3G207900/Seita.3G282000/Seita.5G175100/Seita.5G284300/Seita.5G284400/Seita.5G284600/Seita.5G365500/Seita.6G120100/Seita.6G170500/Seita.6G205200/Seita.7G094400/Seita.7G100500/Seita.7G208700/Seita.7G267600/Seita.8G141900/Seita.8G176000/Seita.9G290900/Seita.9G339100/Seita.9G4…	31
Ci328down	sita00592	alpha-Linolenic acid metabolism	14/639	58/5494	0.00552963	0.0316418	0.0252229	Seita.1G122400/Seita.3G070700/Seita.4G077900/Seita.4G078000/Seita.4G078100/Seita.4G078200/Seita.6G205300/Seita.7G110100/Seita.7G113700/Seita.7G267400/Seita.8G180100/Seita.9G122800/Seita.9G357200/Seita.9G483700	14
Ci409down	sita00940	Phenylpropanoid biosynthesis	75/545	282/5494	1.30686e-16	1.35913e-14	1.073e-14	Seita.1G022400/Seita.1G022900/Seita.1G079000/Seita.1G098300/Seita.1G157600/Seita.1G240500/Seita.1G240600/Seita.1G281400/Seita.2G320200/Seita.2G371600/Seita.2G407300/Seita.2G430900/Seita.2G431300/Seita.2G431500/Seita.2G431600/Seita.3G004800/Seita.3G004900/Seita.3G005000/Seita.3G005100/Seita.3G005200/Seita.3G052400/Seita.3G052900/Seita.3G053100/Seita.3G190400/Seita.3G234900/Seita.3G235000/Seita.3G2…	75
Ci409down	sita00904	Diterpenoid biosynthesis	13/545	35/5494	1.47463e-05	0.000766807	0.000605374	Seita.2G038800/Seita.2G144900/Seita.2G145800/Seita.2G145900/Seita.4G235500/Seita.4G235600/Seita.5G157700/Seita.5G323400/Seita.5G404900/Seita.6G023100/Seita.6G089500/Seita.6G100500/Seita.6G101900	13
Ci409down	sita04626	Plant-pathogen interaction	43/545	243/5494	9.61877e-05	0.00278967	0.00220237	Seita.2G024600/Seita.2G024800/Seita.2G062100/Seita.2G128800/Seita.2G246400/Seita.2G357800/Seita.3G053500/Seita.3G206900/Seita.3G290500/Seita.3G350300/Seita.3G380800/Seita.4G163600/Seita.4G281500/Seita.5G097100/Seita.5G175100/Seita.5G217800/Seita.5G286600/Seita.5G330300/Seita.5G365500/Seita.5G451500/Seita.5G456800/Seita.5G456900/Seita.6G120000/Seita.6G120100/Seita.6G219800/Seita.7G147800/Seita.7G2…	43
Ci409down	sita00592	alpha-Linolenic acid metabolism	16/545	58/5494	0.000107295	0.00278967	0.00220237	Seita.1G122400/Seita.2G271000/Seita.3G070700/Seita.4G077900/Seita.4G078000/Seita.4G078100/Seita.4G078200/Seita.4G144800/Seita.5G169400/Seita.6G205300/Seita.7G110100/Seita.7G113700/Seita.8G099000/Seita.8G180100/Seita.9G122800/Seita.9G483700	16
Ci409down	sita04016	MAPK signaling pathway - plant	31/545	167/5494	0.000387876	0.00806782	0.00636933	Seita.1G030500/Seita.1G049200/Seita.1G144700/Seita.2G024600/Seita.2G024800/Seita.2G039200/Seita.2G138400/Seita.3G160700/Seita.3G160800/Seita.3G206900/Seita.3G207900/Seita.4G163600/Seita.4G223000/Seita.4G239500/Seita.4G286000/Seita.5G175100/Seita.5G284400/Seita.5G284600/Seita.5G365500/Seita.6G120000/Seita.6G120100/Seita.7G100500/Seita.7G239900/Seita.7G267600/Seita.8G003300/Seita.8G141900/Seita.8G1…	31
Ci409down	sita00010	Glycolysis / Gluconeogenesis	30/545	165/5494	0.000688872	0.0108201	0.00854215	Seita.1G004400/Seita.1G071600/Seita.1G221800/Seita.1G307000/Seita.1G314800/Seita.1G322900/Seita.2G057100/Seita.2G394300/Seita.3G111200/Seita.3G247900/Seita.4G093100/Seita.5G377300/Seita.5G380500/Seita.6G156600/Seita.7G122800/Seita.7G122900/Seita.7G123000/Seita.7G226400/Seita.7G268900/Seita.7G281700/Seita.7G315100/Seita.8G024300/Seita.8G050800/Seita.8G099000/Seita.9G027100/Seita.9G156800/Seita.9G3…	30
Ci409down	sita00531	Glycosaminoglycan degradation	7/545	17/5494	0.000728273	0.0108201	0.00854215	Seita.1G354100/Seita.2G365000/Seita.3G364800/Seita.4G053700/Seita.5G440300/Seita.5G440400/Seita.9G399100	7
Ci409down	sita00620	Pyruvate metabolism	22/545	113/5494	0.00140222	0.0182289	0.0143912	Seita.1G004400/Seita.1G307000/Seita.1G314800/Seita.2G057100/Seita.2G137100/Seita.2G394300/Seita.3G109300/Seita.3G247900/Seita.4G119800/Seita.5G301800/Seita.5G324500/Seita.5G380500/Seita.6G156600/Seita.7G030200/Seita.7G268900/Seita.7G281700/Seita.8G099000/Seita.9G027100/Seita.9G156800/Seita.9G314300/Seita.9G510900/Seita.9G511000	22
Ci409down	sita00480	Glutathione metabolism	25/545	141/5494	0.0026951	0.0311434	0.0245869	Seita.1G166500/Seita.1G221400/Seita.2G033500/Seita.2G444500/Seita.3G038600/Seita.3G348900/Seita.4G009400/Seita.4G232000/Seita.4G241000/Seita.5G104100/Seita.5G452900/Seita.7G153200/Seita.8G008300/Seita.8G040400/Seita.9G121100/Seita.9G157600/Seita.9G261500/Seita.9G345500/Seita.9G345600/Seita.9G345700/Seita.9G345800/Seita.9G346800/Seita.9G346900/Seita.9G347000/Seita.9G444200	25
