# Supplementary material for: Response of Multiple Tissues to Drought Revealed by a Weighted Gene Co-Expression Network Analysis in Foxtail Millet [Setaria italica (L.) P. Beauv.]
Source: Front Plant Sci. 2022 Jan 12;12:746166. doi: 10.3389/fpls.2021.746166 (PMC8790073; doi:10.3389/fpls.2021.746166)
Supplement: Supplementary Table S5 — A list of GO categories of DEGs detected in this study. [file Table_5.XLSX]

## Sheet: Supplementary Table S5
Supplementary Table S5: List of GO categories of DEGs detected in this study
Root												Stem												Leaf
DEG Set	ONTOLOGY	GO_ID	Description	GeneRatio	BgRatio	pvalue	p.adjust	qvalue	geneID	Count		DEG Set	ONTOLOGY	GO_ID	Description	GeneRatio	BgRatio	pvalue	p.adjust	qvalue	geneID	Count		DEG Set	ONTOLOGY	GO_ID	Description	GeneRatio	BgRatio	pvalue	p.adjust	qvalue	geneID	Count
Ci134DEG	BP	GO:0006721	terpenoid metabolic process	46/1131	159/9983	9.10041e-10	1.97843e-06	1.89959e-06	Seita.1G367300/Seita.2G000900/Seita.2G104900/Seita.2G144900/Seita.2G145800/Seita.2G145900/Seita.2G300900/Seita.2G303000/Seita.2G390100/Seita.2G400600/Seita.4G015600/Seita.4G015700/Seita.4G021600/Seita.4G051800/Seita.4G223200/Seita.4G235500/Seita.4G235600/Seita.5G071800/Seita.5G157700/Seita.5G285100/Seita.5G285200/Seita.5G315600/Seita.5G315800/Seita.5G323400/Seita.5G404900/Seita.6G023100/Seita.6G1…	46		Ci134DEG	BP	GO:0009834	plant-type secondary cell wall biogenesis	21/745	73/9983	4.27908e-08	8.43407e-05	8.32394e-05	Seita.1G080900/Seita.1G116500/Seita.2G209100/Seita.3G046000/Seita.3G132100/Seita.3G136800/Seita.3G158400/Seita.3G158500/Seita.3G217800/Seita.3G235400/Seita.3G350800/Seita.5G242700/Seita.5G319100/Seita.5G363400/Seita.5G437300/Seita.7G220500/Seita.7G264400/Seita.7G272500/Seita.8G252500/Seita.9G425900/Seita.9G560500	21		Ci134DEG	BP	GO:0098656	anion transmembrane transport	52/911	265/9983	7.3492e-08	0.000148674	0.000141878	Seita.1G044800/Seita.1G115800/Seita.1G116100/Seita.1G127900/Seita.1G218500/Seita.1G218600/Seita.1G241300/Seita.1G268000/Seita.1G278500/Seita.2G106700/Seita.2G141700/Seita.2G167400/Seita.2G335600/Seita.2G352700/Seita.2G360800/Seita.3G102000/Seita.3G150400/Seita.3G223500/Seita.3G283100/Seita.3G333100/Seita.3G406500/Seita.4G005300/Seita.4G083300/Seita.4G227300/Seita.4G231500/Seita.5G026800/Seita.5G1…	52
Ci134DEG	BP	GO:0006720	isoprenoid metabolic process	51/1131	191/9983	2.46472e-09	2.67915e-06	2.57239e-06	Seita.1G047500/Seita.1G367300/Seita.2G000900/Seita.2G104900/Seita.2G144900/Seita.2G145800/Seita.2G145900/Seita.2G187800/Seita.2G187900/Seita.2G300900/Seita.2G303000/Seita.2G390100/Seita.2G400600/Seita.3G245500/Seita.4G015600/Seita.4G015700/Seita.4G021600/Seita.4G051800/Seita.4G223200/Seita.4G235500/Seita.4G235600/Seita.5G071800/Seita.5G157700/Seita.5G285100/Seita.5G285200/Seita.5G315600/Seita.5G3…	51		Ci134DEG	BP	GO:0045492	xylan biosynthetic process	13/745	31/9983	1.17268e-07	0.000115567	0.000114058	Seita.1G080900/Seita.3G046000/Seita.3G132100/Seita.3G158400/Seita.3G158500/Seita.3G217800/Seita.3G235400/Seita.5G437300/Seita.7G264400/Seita.9G037100/Seita.9G425900/Seita.9G440600/Seita.9G441000	13		Ci134DEG	BP	GO:0009637	response to blue light	22/911	78/9983	1.02964e-06	0.000625639	0.00059704	Seita.1G203400/Seita.1G289600/Seita.1G306100/Seita.2G053300/Seita.2G053700/Seita.2G053800/Seita.2G193200/Seita.2G262300/Seita.2G302100/Seita.2G351600/Seita.3G028800/Seita.3G126900/Seita.3G140700/Seita.4G139900/Seita.5G251200/Seita.5G279700/Seita.7G018400/Seita.7G119400/Seita.7G303000/Seita.8G012100/Seita.8G080900/Seita.9G504100	22
Ci134DEG	BP	GO:0042446	hormone biosynthetic process	51/1131	200/9983	1.33969e-08	9.70832e-06	9.32146e-06	Seita.1G245800/Seita.1G275400/Seita.1G371900/Seita.2G000900/Seita.2G039800/Seita.2G104900/Seita.2G144900/Seita.2G201000/Seita.2G225500/Seita.2G229900/Seita.2G334600/Seita.2G390100/Seita.2G436000/Seita.3G116300/Seita.4G051800/Seita.4G078000/Seita.4G235500/Seita.4G235600/Seita.5G069100/Seita.5G139200/Seita.5G208900/Seita.5G315600/Seita.5G315800/Seita.5G323400/Seita.5G404900/Seita.5G416000/Seita.6G0…	51		Ci134DEG	BP	GO:0045491	xylan metabolic process	16/745	51/9983	4.7459e-07	0.000226369	0.000223413	Seita.1G080900/Seita.2G439200/Seita.3G046000/Seita.3G132100/Seita.3G158400/Seita.3G158500/Seita.3G217800/Seita.3G235400/Seita.5G437300/Seita.7G257800/Seita.7G264400/Seita.8G081100/Seita.9G037100/Seita.9G425900/Seita.9G440600/Seita.9G441000	16		Ci134DEG	BP	GO:0005975	carbohydrate metabolic process	75/911	474/9983	1.19026e-06	0.000625639	0.00059704	Seita.1G080900/Seita.1G127500/Seita.1G294300/Seita.1G301000/Seita.1G323700/Seita.2G003000/Seita.2G080900/Seita.2G081000/Seita.2G143400/Seita.2G168000/Seita.2G188200/Seita.2G209100/Seita.2G235900/Seita.2G261100/Seita.2G262300/Seita.2G263800/Seita.2G351400/Seita.2G384400/Seita.2G396200/Seita.2G422000/Seita.2G443600/Seita.3G003000/Seita.3G109600/Seita.3G176900/Seita.3G217800/Seita.3G275400/Seita.3G3…	75
Ci134DEG	BP	GO:0042445	hormone metabolic process	64/1131	288/9983	6.37713e-08	3.46597e-05	3.32786e-05	Seita.1G245800/Seita.1G275400/Seita.1G371900/Seita.2G000900/Seita.2G039800/Seita.2G104900/Seita.2G144900/Seita.2G201000/Seita.2G225500/Seita.2G229900/Seita.2G334600/Seita.2G390100/Seita.2G436000/Seita.3G116300/Seita.3G147000/Seita.3G170100/Seita.3G201500/Seita.4G015600/Seita.4G015700/Seita.4G051800/Seita.4G078000/Seita.4G235500/Seita.4G235600/Seita.5G069100/Seita.5G139200/Seita.5G157700/Seita.5G2…	64		Ci134DEG	BP	GO:0003333	amino acid transmembrane transport	18/745	64/9983	5.74248e-07	0.000226369	0.000223413	Seita.1G268000/Seita.1G333100/Seita.2G090200/Seita.3G223500/Seita.4G005300/Seita.4G006500/Seita.4G006600/Seita.4G161300/Seita.5G026800/Seita.5G365100/Seita.5G387200/Seita.7G037100/Seita.7G125900/Seita.7G298300/Seita.8G047400/Seita.9G299000/Seita.9G311800/Seita.9G431100	18		Ci134DEG	BP	GO:0006820	anion transport	57/911	328/9983	1.23705e-06	0.000625639	0.00059704	Seita.1G044800/Seita.1G115800/Seita.1G116100/Seita.1G127900/Seita.1G218500/Seita.1G218600/Seita.1G241300/Seita.1G257200/Seita.1G268000/Seita.1G275700/Seita.1G278500/Seita.2G106700/Seita.2G141700/Seita.2G167400/Seita.2G335600/Seita.2G352700/Seita.2G360800/Seita.3G102000/Seita.3G150400/Seita.3G223500/Seita.3G283100/Seita.3G333100/Seita.3G406500/Seita.4G005300/Seita.4G083300/Seita.4G227300/Seita.4G2…	57
Ci134DEG	BP	GO:0010817	regulation of hormone levels	79/1131	390/9983	1.29725e-07	5.64044e-05	5.41568e-05	Seita.1G228300/Seita.1G245800/Seita.1G275400/Seita.1G371900/Seita.2G000900/Seita.2G039800/Seita.2G104900/Seita.2G144900/Seita.2G201000/Seita.2G221700/Seita.2G225500/Seita.2G229900/Seita.2G264800/Seita.2G334600/Seita.2G390100/Seita.2G436000/Seita.3G116300/Seita.3G147000/Seita.3G170100/Seita.3G201500/Seita.4G015600/Seita.4G015700/Seita.4G051800/Seita.4G078000/Seita.4G235500/Seita.4G235600/Seita.4G2…	79		Ci134DEG	BP	GO:0006865	amino acid transport	18/745	64/9983	5.74248e-07	0.000226369	0.000223413	Seita.1G268000/Seita.1G333100/Seita.2G090200/Seita.3G223500/Seita.4G005300/Seita.4G006500/Seita.4G006600/Seita.4G161300/Seita.5G026800/Seita.5G365100/Seita.5G387200/Seita.7G037100/Seita.7G125900/Seita.7G298300/Seita.8G047400/Seita.9G299000/Seita.9G311800/Seita.9G431100	18		Ci134DEG	BP	GO:0044262	cellular carbohydrate metabolic process	55/911	322/9983	3.29059e-06	0.00133137	0.00127051	Seita.1G080900/Seita.1G323700/Seita.2G080900/Seita.2G143400/Seita.2G168000/Seita.2G188200/Seita.2G209100/Seita.2G235900/Seita.2G261100/Seita.2G262300/Seita.2G396200/Seita.2G422000/Seita.2G443600/Seita.3G003000/Seita.3G109600/Seita.3G176900/Seita.3G217800/Seita.3G275400/Seita.3G332200/Seita.4G065500/Seita.4G099300/Seita.4G101200/Seita.5G065300/Seita.5G069500/Seita.5G134800/Seita.5G157600/Seita.5G2…	55
Ci134DEG	BP	GO:0016101	diterpenoid metabolic process	24/1131	70/9983	3.18851e-07	0.000108799	0.000104463	Seita.2G000900/Seita.2G144900/Seita.2G145800/Seita.2G145900/Seita.2G390100/Seita.4G015600/Seita.4G015700/Seita.4G051800/Seita.4G235500/Seita.4G235600/Seita.5G157700/Seita.5G323400/Seita.5G404900/Seita.6G023100/Seita.6G100500/Seita.6G101900/Seita.7G171000/Seita.7G171100/Seita.8G068800/Seita.8G069000/Seita.8G166500/Seita.9G004400/Seita.9G241000/Seita.J029400	24		Ci134DEG	BP	GO:0071554	cell wall organization or biogenesis	56/745	409/9983	5.75012e-06	0.00188891	0.00186425	Seita.1G079000/Seita.1G080900/Seita.1G112800/Seita.1G116500/Seita.1G338900/Seita.2G044900/Seita.2G209100/Seita.2G347700/Seita.2G382900/Seita.2G404000/Seita.2G439200/Seita.3G046000/Seita.3G132100/Seita.3G136800/Seita.3G158400/Seita.3G158500/Seita.3G217800/Seita.3G235400/Seita.3G347500/Seita.3G350800/Seita.4G181500/Seita.4G259700/Seita.5G053000/Seita.5G242700/Seita.5G246600/Seita.5G319100/Seita.5G3…	56		Ci134DEG	BP	GO:0080167	response to karrikin	29/911	136/9983	1.10842e-05	0.00373722	0.00356638	Seita.1G057100/Seita.1G057300/Seita.1G115800/Seita.1G116100/Seita.1G332100/Seita.2G053300/Seita.2G053700/Seita.2G053800/Seita.2G081000/Seita.2G270400/Seita.2G335600/Seita.3G103400/Seita.3G270200/Seita.3G369800/Seita.3G406500/Seita.4G043100/Seita.4G096400/Seita.5G056800/Seita.5G236200/Seita.5G386100/Seita.6G007700/Seita.6G166300/Seita.7G028400/Seita.7G079000/Seita.7G149800/Seita.7G168700/Seita.8G2…	29
Ci134DEG	BP	GO:0008299	isoprenoid biosynthetic process	40/1131	155/9983	3.50319e-07	0.000108799	0.000104463	Seita.1G047500/Seita.1G367300/Seita.2G000900/Seita.2G104900/Seita.2G144900/Seita.2G187800/Seita.2G187900/Seita.2G300900/Seita.2G303000/Seita.2G390100/Seita.2G400600/Seita.3G245500/Seita.4G021600/Seita.4G051800/Seita.4G223200/Seita.4G235500/Seita.4G235600/Seita.5G071800/Seita.5G285100/Seita.5G285200/Seita.5G315600/Seita.5G315800/Seita.5G323400/Seita.5G404900/Seita.6G208200/Seita.6G234800/Seita.7G1…	40		Ci134DEG	BP	GO:0010383	cell wall polysaccharide metabolic process	23/745	112/9983	6.739e-06	0.00189751	0.00187273	Seita.1G080900/Seita.2G209100/Seita.2G439200/Seita.3G046000/Seita.3G132100/Seita.3G158400/Seita.3G158500/Seita.3G217800/Seita.3G235400/Seita.5G053000/Seita.5G437300/Seita.7G257800/Seita.7G264400/Seita.8G081100/Seita.8G128800/Seita.9G021900/Seita.9G037100/Seita.9G260200/Seita.9G425900/Seita.9G440600/Seita.9G441000/Seita.9G494200/Seita.9G542400	23		Ci134DEG	BP	GO:0006979	response to oxidative stress	60/911	380/9983	1.53141e-05	0.00442579	0.00422348	Seita.1G012200/Seita.1G044800/Seita.1G063600/Seita.1G123800/Seita.1G193500/Seita.1G206500/Seita.1G209000/Seita.1G210300/Seita.1G272900/Seita.1G323700/Seita.1G335200/Seita.2G081000/Seita.2G188200/Seita.2G219700/Seita.2G312300/Seita.2G396200/Seita.2G441700/Seita.2G444000/Seita.3G016700/Seita.3G145000/Seita.3G175700/Seita.3G248500/Seita.3G402100/Seita.4G274700/Seita.5G157600/Seita.5G284300/Seita.5G3…	60
Ci134DEG	BP	GO:0016114	terpenoid biosynthetic process	35/1131	128/9983	4.25572e-07	0.000115649	0.000111041	Seita.1G367300/Seita.2G000900/Seita.2G104900/Seita.2G144900/Seita.2G300900/Seita.2G303000/Seita.2G390100/Seita.2G400600/Seita.4G021600/Seita.4G051800/Seita.4G223200/Seita.4G235500/Seita.4G235600/Seita.5G071800/Seita.5G285100/Seita.5G285200/Seita.5G315600/Seita.5G315800/Seita.5G323400/Seita.5G404900/Seita.6G208200/Seita.7G187900/Seita.7G189300/Seita.8G068800/Seita.8G069000/Seita.8G101900/Seita.8G1…	35		Ci134DEG	BP	GO:0010410	hemicellulose metabolic process	18/745	77/9983	1.03558e-05	0.00227359	0.0022439	Seita.1G080900/Seita.2G439200/Seita.3G046000/Seita.3G132100/Seita.3G158400/Seita.3G158500/Seita.3G217800/Seita.3G235400/Seita.5G437300/Seita.7G257800/Seita.7G264400/Seita.8G081100/Seita.9G037100/Seita.9G260200/Seita.9G425900/Seita.9G440600/Seita.9G441000/Seita.9G542400	18		Ci134DEG	BP	GO:1903825	organic acid transmembrane transport	27/911	133/9983	5.51807e-05	0.012029	0.0114791	Seita.1G268000/Seita.2G106700/Seita.2G141700/Seita.2G167400/Seita.2G335600/Seita.2G360800/Seita.3G102000/Seita.3G223500/Seita.4G005300/Seita.4G083300/Seita.4G231500/Seita.5G026800/Seita.5G121600/Seita.5G127600/Seita.5G145600/Seita.5G242900/Seita.5G365100/Seita.5G387200/Seita.5G469400/Seita.6G118800/Seita.7G102400/Seita.7G125900/Seita.8G107500/Seita.9G306500/Seita.9G311800/Seita.9G431100/Seita.9G4…	27
Ci134DEG	BP	GO:0009636	response to toxic substance	55/1131	252/9983	9.95782e-07	0.000240537	0.000230952	Seita.1G012200/Seita.1G045200/Seita.1G079000/Seita.1G192100/Seita.1G245800/Seita.2G033500/Seita.2G090300/Seita.2G179700/Seita.2G324100/Seita.2G406500/Seita.3G038700/Seita.3G089400/Seita.3G096900/Seita.3G097200/Seita.3G190400/Seita.3G192300/Seita.3G270300/Seita.3G347500/Seita.4G020900/Seita.4G067200/Seita.4G232000/Seita.4G259700/Seita.5G015400/Seita.5G207000/Seita.5G249900/Seita.5G346500/Seita.5G4…	55		Ci134DEG	BP	GO:0044038	cell wall macromolecule biosynthetic process	16/745	64/9983	1.28915e-05	0.00227359	0.0022439	Seita.1G080900/Seita.3G046000/Seita.3G132100/Seita.3G158400/Seita.3G158500/Seita.3G217800/Seita.3G235400/Seita.5G437300/Seita.7G264400/Seita.8G128800/Seita.9G037100/Seita.9G425900/Seita.9G440600/Seita.9G441000/Seita.9G494200/Seita.9G542400	16		Ci134DEG	BP	GO:1905039	carboxylic acid transmembrane transport	27/911	133/9983	5.51807e-05	0.012029	0.0114791	Seita.1G268000/Seita.2G106700/Seita.2G141700/Seita.2G167400/Seita.2G335600/Seita.2G360800/Seita.3G102000/Seita.3G223500/Seita.4G005300/Seita.4G083300/Seita.4G231500/Seita.5G026800/Seita.5G121600/Seita.5G127600/Seita.5G145600/Seita.5G242900/Seita.5G365100/Seita.5G387200/Seita.5G469400/Seita.6G118800/Seita.7G102400/Seita.7G125900/Seita.8G107500/Seita.9G306500/Seita.9G311800/Seita.9G431100/Seita.9G4…	27
Ci134DEG	BP	GO:0008610	lipid biosynthetic process	78/1131	404/9983	1.17873e-06	0.000256255	0.000246043	Seita.1G047500/Seita.1G219200/Seita.1G367300/Seita.2G000900/Seita.2G039800/Seita.2G079200/Seita.2G104900/Seita.2G144900/Seita.2G187800/Seita.2G187900/Seita.2G229900/Seita.2G300900/Seita.2G303000/Seita.2G334600/Seita.2G390100/Seita.2G400600/Seita.3G116300/Seita.3G134300/Seita.3G165200/Seita.3G245500/Seita.3G346000/Seita.3G403100/Seita.4G021600/Seita.4G051800/Seita.4G078000/Seita.4G101200/Seita.4G2…	78		Ci134DEG	BP	GO:0070589	cellular component macromolecule biosynthetic process	16/745	64/9983	1.28915e-05	0.00227359	0.0022439	Seita.1G080900/Seita.3G046000/Seita.3G132100/Seita.3G158400/Seita.3G158500/Seita.3G217800/Seita.3G235400/Seita.5G437300/Seita.7G264400/Seita.8G128800/Seita.9G037100/Seita.9G425900/Seita.9G440600/Seita.9G441000/Seita.9G494200/Seita.9G542400	16		Ci134DEG	BP	GO:0009415	response to water	54/911	347/9983	6.10655e-05	0.012029	0.0114791	Seita.1G267200/Seita.1G278900/Seita.1G324300/Seita.2G035400/Seita.2G142500/Seita.2G252300/Seita.2G284000/Seita.2G312300/Seita.2G352700/Seita.3G007200/Seita.3G144000/Seita.3G157100/Seita.3G162400/Seita.3G193800/Seita.3G260500/Seita.3G260600/Seita.3G369800/Seita.4G082000/Seita.4G281500/Seita.5G046600/Seita.5G069100/Seita.5G166200/Seita.5G166300/Seita.5G174100/Seita.5G319100/Seita.5G351300/Seita.5G3…	54
Ci134DEG	BP	GO:0019748	secondary metabolic process	61/1131	305/9983	5.52351e-06	0.00109165	0.00104815	Seita.1G064000/Seita.1G219200/Seita.1G245800/Seita.2G033500/Seita.2G104900/Seita.2G132800/Seita.2G145700/Seita.2G145800/Seita.2G145900/Seita.2G147600/Seita.2G219600/Seita.2G224300/Seita.2G278500/Seita.2G283800/Seita.2G300900/Seita.2G400600/Seita.3G096900/Seita.3G097200/Seita.3G097400/Seita.3G140700/Seita.3G142500/Seita.3G339800/Seita.4G021600/Seita.4G121900/Seita.4G181500/Seita.4G216300/Seita.4G2…	61		Ci134DEG	BP	GO:0070592	cell wall polysaccharide biosynthetic process	16/745	64/9983	1.28915e-05	0.00227359	0.0022439	Seita.1G080900/Seita.3G046000/Seita.3G132100/Seita.3G158400/Seita.3G158500/Seita.3G217800/Seita.3G235400/Seita.5G437300/Seita.7G264400/Seita.8G128800/Seita.9G037100/Seita.9G425900/Seita.9G440600/Seita.9G441000/Seita.9G494200/Seita.9G542400	16		Ci134DEG	BP	GO:0009834	plant-type secondary cell wall biogenesis	18/911	73/9983	7.10512e-05	0.012029	0.0114791	Seita.1G080900/Seita.1G309600/Seita.2G080900/Seita.2G200100/Seita.2G200200/Seita.2G209100/Seita.2G443600/Seita.3G003000/Seita.3G217800/Seita.3G275400/Seita.4G289300/Seita.5G319100/Seita.5G363400/Seita.6G086100/Seita.7G220500/Seita.8G252500/Seita.9G227400/Seita.9G560500	18
Ci134DEG	BP	GO:0048878	chemical homeostasis	64/1131	328/9983	7.61028e-06	0.00137873	0.00132379	Seita.1G019500/Seita.1G228300/Seita.1G256100/Seita.1G263000/Seita.1G274100/Seita.1G333100/Seita.2G090300/Seita.2G229900/Seita.2G264800/Seita.2G277900/Seita.2G309200/Seita.3G006100/Seita.3G030500/Seita.3G049900/Seita.3G051000/Seita.3G097600/Seita.3G116300/Seita.3G201500/Seita.3G243800/Seita.3G260800/Seita.3G312900/Seita.3G375800/Seita.3G391700/Seita.4G138500/Seita.4G159500/Seita.4G175000/Seita.4G2…	64		Ci134DEG	BP	GO:0044036	cell wall macromolecule metabolic process	24/745	125/9983	1.43e-05	0.00227359	0.0022439	Seita.1G080900/Seita.2G209100/Seita.2G439200/Seita.3G046000/Seita.3G132100/Seita.3G158400/Seita.3G158500/Seita.3G217800/Seita.3G235400/Seita.5G053000/Seita.5G437300/Seita.7G257800/Seita.7G264400/Seita.8G081100/Seita.8G128800/Seita.9G021900/Seita.9G037100/Seita.9G260200/Seita.9G425900/Seita.9G440600/Seita.9G441000/Seita.9G494200/Seita.9G542400/Seita.9G573900	24		Ci134DEG	BP	GO:0042440	pigment metabolic process	32/911	172/9983	7.13534e-05	0.012029	0.0114791	Seita.1G057100/Seita.1G102500/Seita.1G332100/Seita.2G053300/Seita.2G053700/Seita.2G053800/Seita.2G270400/Seita.2G285600/Seita.3G185800/Seita.3G270200/Seita.4G043100/Seita.4G096400/Seita.4G156200/Seita.5G040100/Seita.5G056800/Seita.5G087500/Seita.5G365700/Seita.5G412600/Seita.5G461800/Seita.6G073100/Seita.6G159400/Seita.7G079000/Seita.7G116400/Seita.7G116800/Seita.7G119400/Seita.7G157900/Seita.7G1…	32
Ci134DEG	BP	GO:0009415	response to water	66/1131	347/9983	1.31902e-05	0.00220582	0.00211792	Seita.1G079000/Seita.1G103700/Seita.1G127700/Seita.1G161800/Seita.1G278900/Seita.1G324300/Seita.1G331600/Seita.2G033500/Seita.2G400600/Seita.2G406500/Seita.2G436000/Seita.3G162400/Seita.3G237600/Seita.3G337900/Seita.3G347500/Seita.3G379400/Seita.4G021600/Seita.4G041500/Seita.4G082000/Seita.4G112000/Seita.4G227700/Seita.4G232000/Seita.4G239500/Seita.4G259700/Seita.5G000800/Seita.5G044000/Seita.5G0…	66		Ci134DEG	BP	GO:0071669	plant-type cell wall organization or biogenesis	39/745	257/9983	1.49958e-05	0.00227359	0.0022439	Seita.1G079000/Seita.1G080900/Seita.1G116500/Seita.1G338900/Seita.2G044900/Seita.2G209100/Seita.2G347700/Seita.2G382900/Seita.3G046000/Seita.3G132100/Seita.3G136800/Seita.3G158400/Seita.3G158500/Seita.3G217800/Seita.3G235400/Seita.3G347500/Seita.3G350800/Seita.4G259700/Seita.5G242700/Seita.5G319100/Seita.5G363400/Seita.5G437300/Seita.5G463200/Seita.7G220500/Seita.7G264400/Seita.7G272500/Seita.8G1…	39		Ci134DEG	BP	GO:0009636	response to toxic substance	42/911	252/9983	8.46852e-05	0.0131783	0.0125759	Seita.1G002000/Seita.1G012200/Seita.1G206500/Seita.1G209000/Seita.1G239600/Seita.1G245800/Seita.1G380000/Seita.2G001400/Seita.2G312300/Seita.2G352900/Seita.2G444000/Seita.3G016700/Seita.3G097200/Seita.3G145000/Seita.3G175700/Seita.5G046600/Seita.5G157600/Seita.5G171000/Seita.5G174100/Seita.5G263000/Seita.5G328300/Seita.5G342100/Seita.5G346500/Seita.6G053800/Seita.7G023900/Seita.7G102200/Seita.7G1…	42
Ci134DEG	BP	GO:0006979	response to oxidative stress	69/1131	380/9983	4.08822e-05	0.00634842	0.00609544	Seita.1G012200/Seita.1G045200/Seita.1G134200/Seita.1G144700/Seita.1G192100/Seita.1G209700/Seita.1G210300/Seita.1G257600/Seita.1G263400/Seita.1G272900/Seita.1G323700/Seita.2G033500/Seita.2G077200/Seita.2G081000/Seita.2G156100/Seita.2G179700/Seita.2G219600/Seita.2G225500/Seita.2G280700/Seita.2G396200/Seita.2G441700/Seita.3G089400/Seita.3G111700/Seita.3G192300/Seita.3G368800/Seita.4G067200/Seita.4G1…	69		Ci134DEG	BP	GO:0042546	cell wall biogenesis	30/745	180/9983	2.39308e-05	0.00336912	0.00332513	Seita.1G080900/Seita.1G116500/Seita.2G209100/Seita.2G382900/Seita.3G046000/Seita.3G132100/Seita.3G136800/Seita.3G158400/Seita.3G158500/Seita.3G217800/Seita.3G235400/Seita.3G350800/Seita.5G242700/Seita.5G319100/Seita.5G363400/Seita.5G437300/Seita.7G220500/Seita.7G264400/Seita.7G272500/Seita.8G128800/Seita.8G252500/Seita.9G037100/Seita.9G425900/Seita.9G434100/Seita.9G440600/Seita.9G441000/Seita.9G4…	30		Ci134DEG	BP	GO:0009414	response to water deprivation	52/911	340/9983	0.000131325	0.0186402	0.0177881	Seita.1G267200/Seita.1G278900/Seita.1G324300/Seita.2G035400/Seita.2G142500/Seita.2G252300/Seita.2G284000/Seita.2G312300/Seita.2G352700/Seita.3G007200/Seita.3G144000/Seita.3G157100/Seita.3G162400/Seita.3G193800/Seita.3G260500/Seita.3G260600/Seita.3G369800/Seita.4G082000/Seita.4G281500/Seita.5G046600/Seita.5G166200/Seita.5G166300/Seita.5G174100/Seita.5G319100/Seita.5G351300/Seita.5G384100/Seita.5G3…	52
Ci134DEG	BP	GO:0055088	lipid homeostasis	17/1131	53/9983	4.47055e-05	0.00647931	0.00622112	Seita.2G229900/Seita.2G277900/Seita.3G116300/Seita.3G201500/Seita.3G243800/Seita.3G312900/Seita.5G139200/Seita.5G232500/Seita.7G199400/Seita.7G204200/Seita.7G318000/Seita.8G166500/Seita.9G021400/Seita.9G173500/Seita.9G205600/Seita.9G205700/Seita.9G205800	17		Ci134DEG	BP	GO:0009832	plant-type cell wall biogenesis	25/745	147/9983	8.0136e-05	0.0101459	0.0100134	Seita.1G080900/Seita.1G116500/Seita.2G209100/Seita.2G382900/Seita.3G046000/Seita.3G132100/Seita.3G136800/Seita.3G158400/Seita.3G158500/Seita.3G217800/Seita.3G235400/Seita.3G350800/Seita.5G242700/Seita.5G319100/Seita.5G363400/Seita.5G437300/Seita.7G220500/Seita.7G264400/Seita.7G272500/Seita.8G128800/Seita.8G252500/Seita.9G425900/Seita.9G434100/Seita.9G494200/Seita.9G560500	25		Ci134DEG	BP	GO:0015849	organic acid transport	28/911	148/9983	0.000147426	0.0186402	0.0177881	Seita.1G268000/Seita.2G106700/Seita.2G141700/Seita.2G167400/Seita.2G335600/Seita.2G360800/Seita.3G102000/Seita.3G223500/Seita.4G005300/Seita.4G083300/Seita.4G231500/Seita.5G026800/Seita.5G121600/Seita.5G127600/Seita.5G145600/Seita.5G229200/Seita.5G242900/Seita.5G365100/Seita.5G387200/Seita.5G469400/Seita.6G118800/Seita.7G102400/Seita.7G125900/Seita.8G107500/Seita.9G306500/Seita.9G311800/Seita.9G4…	28
Ci134DEG	BP	GO:0009685	gibberellin metabolic process	16/1131	50/9983	7.69815e-05	0.0104599	0.0100431	Seita.2G000900/Seita.2G144900/Seita.2G390100/Seita.4G015600/Seita.4G015700/Seita.4G051800/Seita.4G235500/Seita.4G235600/Seita.5G157700/Seita.5G323400/Seita.5G404900/Seita.7G171000/Seita.7G171100/Seita.8G166500/Seita.9G004400/Seita.J029400	16		Ci134DEG	BP	GO:0034637	cellular carbohydrate biosynthetic process	26/745	156/9983	8.23612e-05	0.0101459	0.0100134	Seita.1G080900/Seita.1G244200/Seita.1G262000/Seita.1G318200/Seita.1G323700/Seita.2G209100/Seita.2G396200/Seita.3G046000/Seita.3G132100/Seita.3G133300/Seita.3G158400/Seita.3G158500/Seita.3G217800/Seita.3G235400/Seita.5G319100/Seita.5G437300/Seita.6G094400/Seita.6G141700/Seita.7G264400/Seita.8G128800/Seita.9G037100/Seita.9G425900/Seita.9G440600/Seita.9G441000/Seita.9G494200/Seita.9G542400	26		Ci134DEG	BP	GO:0046942	carboxylic acid transport	28/911	148/9983	0.000147426	0.0186402	0.0177881	Seita.1G268000/Seita.2G106700/Seita.2G141700/Seita.2G167400/Seita.2G335600/Seita.2G360800/Seita.3G102000/Seita.3G223500/Seita.4G005300/Seita.4G083300/Seita.4G231500/Seita.5G026800/Seita.5G121600/Seita.5G127600/Seita.5G145600/Seita.5G229200/Seita.5G242900/Seita.5G365100/Seita.5G387200/Seita.5G469400/Seita.6G118800/Seita.7G102400/Seita.7G125900/Seita.8G107500/Seita.9G306500/Seita.9G311800/Seita.9G4…	28
Ci134DEG	BP	GO:0009414	response to water deprivation	62/1131	340/9983	8.79163e-05	0.0112429	0.0107949	Seita.1G079000/Seita.1G103700/Seita.1G127700/Seita.1G161800/Seita.1G278900/Seita.1G324300/Seita.1G331600/Seita.2G033500/Seita.2G400600/Seita.2G406500/Seita.3G162400/Seita.3G237600/Seita.3G337900/Seita.3G347500/Seita.3G379400/Seita.4G021600/Seita.4G041500/Seita.4G082000/Seita.4G112000/Seita.4G227700/Seita.4G232000/Seita.4G239500/Seita.4G259700/Seita.5G000800/Seita.5G044000/Seita.5G046700/Seita.5G0…	62		Ci134DEG	BP	GO:0005975	carbohydrate metabolic process	58/745	474/9983	0.000109725	0.0127216	0.0125555	Seita.1G080900/Seita.1G112800/Seita.1G206800/Seita.1G244200/Seita.1G262000/Seita.1G318200/Seita.1G323700/Seita.1G347800/Seita.2G081000/Seita.2G209100/Seita.2G263800/Seita.2G396200/Seita.2G439200/Seita.3G046000/Seita.3G132100/Seita.3G133300/Seita.3G158400/Seita.3G158500/Seita.3G217800/Seita.3G235400/Seita.3G346000/Seita.4G055500/Seita.4G173200/Seita.4G239800/Seita.4G240700/Seita.4G267900/Seita.5G0…	58		Ci134DEG	BP	GO:0009642	response to light intensity	25/911	127/9983	0.000172263	0.0204993	0.0195623	Seita.1G012200/Seita.1G020100/Seita.1G123800/Seita.1G206500/Seita.2G046000/Seita.2G046600/Seita.2G053300/Seita.2G053700/Seita.2G053800/Seita.2G335600/Seita.2G352900/Seita.3G130700/Seita.3G158600/Seita.3G175700/Seita.4G099200/Seita.4G139900/Seita.5G014300/Seita.6G005700/Seita.6G082000/Seita.7G119400/Seita.7G220500/Seita.7G280800/Seita.9G237000/Seita.9G488400/Seita.9G531900	25
Ci134DEG	BP	GO:0016125	sterol metabolic process	19/1131	68/9983	0.000134074	0.0153879	0.0147747	Seita.1G047500/Seita.1G362600/Seita.2G079200/Seita.2G229900/Seita.3G116300/Seita.5G139200/Seita.6G208200/Seita.7G204200/Seita.7G318000/Seita.8G014200/Seita.8G136000/Seita.8G136400/Seita.8G166500/Seita.9G021400/Seita.9G173500/Seita.9G205600/Seita.9G205700/Seita.9G205800/Seita.9G483700	19		Ci134DEG	BP	GO:0010413	glucuronoxylan metabolic process	7/745	18/9983	0.000192177	0.0191327	0.0188829	Seita.3G046000/Seita.3G158400/Seita.3G158500/Seita.3G217800/Seita.3G235400/Seita.5G437300/Seita.7G264400	7		Ci134DEG	BP	GO:0000302	response to reactive oxygen species	34/911	197/9983	0.000198902	0.0223544	0.0213326	Seita.1G012200/Seita.1G206500/Seita.1G209000/Seita.1G210300/Seita.1G335200/Seita.2G219700/Seita.2G441700/Seita.2G444000/Seita.3G145000/Seita.3G175700/Seita.3G248500/Seita.4G274700/Seita.5G157600/Seita.5G328300/Seita.5G342100/Seita.5G414600/Seita.5G456800/Seita.6G053800/Seita.7G023900/Seita.7G102200/Seita.7G119400/Seita.7G126300/Seita.7G141400/Seita.7G220500/Seita.7G225300/Seita.7G301200/Seita.8G0…	34
Ci134DEG	BP	GO:0098754	detoxification	29/1131	126/9983	0.000134485	0.0153879	0.0147747	Seita.1G079000/Seita.1G192100/Seita.1G245800/Seita.2G033500/Seita.2G090300/Seita.2G406500/Seita.3G089400/Seita.3G096900/Seita.3G097200/Seita.3G190400/Seita.3G270300/Seita.3G347500/Seita.4G232000/Seita.4G259700/Seita.5G346500/Seita.5G463200/Seita.6G053800/Seita.7G020900/Seita.7G023900/Seita.7G193900/Seita.7G194000/Seita.7G225300/Seita.7G231200/Seita.7G277800/Seita.9G064400/Seita.9G157600/Seita.9G1…	29		Ci134DEG	BP	GO:0010417	glucuronoxylan biosynthetic process	7/745	18/9983	0.000192177	0.0191327	0.0188829	Seita.3G046000/Seita.3G158400/Seita.3G158500/Seita.3G217800/Seita.3G235400/Seita.5G437300/Seita.7G264400	7		Ci134DEG	BP	GO:0009765	photosynthesis, light harvesting	8/911	20/9983	0.000216579	0.0230599	0.0220058	Seita.2G046600/Seita.2G351600/Seita.2G352900/Seita.3G143800/Seita.4G099200/Seita.4G139900/Seita.8G080900/Seita.9G177100	8
Ci134DEG	BP	GO:0055082	cellular chemical homeostasis	32/1131	145/9983	0.000144222	0.0156769	0.0150522	Seita.1G274100/Seita.3G006100/Seita.3G030500/Seita.3G049900/Seita.3G051000/Seita.3G260800/Seita.4G138500/Seita.4G159500/Seita.4G175000/Seita.5G000800/Seita.5G103100/Seita.5G124100/Seita.5G134800/Seita.5G232500/Seita.5G270400/Seita.5G313600/Seita.5G325800/Seita.5G455700/Seita.6G123500/Seita.7G088700/Seita.7G218000/Seita.7G331800/Seita.8G118200/Seita.9G090100/Seita.9G205600/Seita.9G205700/Seita.9G2…	32		Ci134DEG	BP	GO:0044264	cellular polysaccharide metabolic process	32/745	220/9983	0.000194142	0.0191327	0.0188829	Seita.1G080900/Seita.1G112800/Seita.1G244200/Seita.1G318200/Seita.2G209100/Seita.2G439200/Seita.3G046000/Seita.3G132100/Seita.3G133300/Seita.3G158400/Seita.3G158500/Seita.3G217800/Seita.3G235400/Seita.5G053000/Seita.5G319100/Seita.5G437300/Seita.7G088700/Seita.7G257800/Seita.7G264400/Seita.8G081100/Seita.8G128800/Seita.9G021900/Seita.9G037100/Seita.9G229700/Seita.9G260200/Seita.9G410800/Seita.9G4…	32		Ci134DEG	BP	GO:0016051	carbohydrate biosynthetic process	37/911	223/9983	0.000241318	0.0233548	0.0222872	Seita.1G080900/Seita.1G127500/Seita.1G294300/Seita.1G301000/Seita.1G323700/Seita.2G080900/Seita.2G168000/Seita.2G188200/Seita.2G209100/Seita.2G261100/Seita.2G263800/Seita.2G396200/Seita.2G443600/Seita.3G176900/Seita.3G217800/Seita.3G332200/Seita.4G065500/Seita.4G099300/Seita.4G101200/Seita.4G194100/Seita.4G239800/Seita.5G069500/Seita.5G237300/Seita.5G319100/Seita.5G377200/Seita.6G120500/Seita.6G1…	37
Ci134DEG	BP	GO:0000302	response to reactive oxygen species	40/1131	197/9983	0.000158967	0.0164568	0.0158011	Seita.1G012200/Seita.1G045200/Seita.1G192100/Seita.1G210300/Seita.1G257600/Seita.2G077200/Seita.2G156100/Seita.2G179700/Seita.2G219600/Seita.2G225500/Seita.2G280700/Seita.2G441700/Seita.3G192300/Seita.3G368800/Seita.4G067200/Seita.4G274700/Seita.5G047800/Seita.5G207000/Seita.5G249900/Seita.5G421200/Seita.5G456800/Seita.6G053800/Seita.7G023900/Seita.7G069900/Seita.7G070000/Seita.7G101100/Seita.7G1…	40		Ci134DEG	BP	GO:0009699	phenylpropanoid biosynthetic process	18/745	99/9983	0.000336064	0.031542	0.0311302	Seita.1G230100/Seita.3G142500/Seita.3G194300/Seita.3G218600/Seita.3G394400/Seita.4G181500/Seita.4G191500/Seita.5G053000/Seita.5G386300/Seita.6G055900/Seita.6G093400/Seita.6G244100/Seita.7G155700/Seita.7G220500/Seita.8G126500/Seita.8G128800/Seita.8G252500/Seita.9G214500	18		Ci134DEG	BP	GO:0009644	response to high light intensity	18/911	80/9983	0.000248914	0.0233548	0.0222872	Seita.1G012200/Seita.1G020100/Seita.1G123800/Seita.1G206500/Seita.2G046600/Seita.2G053300/Seita.2G053700/Seita.2G053800/Seita.2G352900/Seita.3G130700/Seita.3G175700/Seita.4G099200/Seita.4G139900/Seita.5G014300/Seita.6G082000/Seita.7G119400/Seita.9G488400/Seita.9G531900	18
Ci134DEG	BP	GO:0090693	plant organ senescence	37/1131	178/9983	0.000168683	0.016669	0.0160047	Seita.1G144700/Seita.1G166500/Seita.1G362600/Seita.2G179700/Seita.2G300900/Seita.2G309200/Seita.2G436000/Seita.2G436400/Seita.2G441700/Seita.3G120900/Seita.3G147300/Seita.3G287100/Seita.3G379400/Seita.4G017200/Seita.4G054100/Seita.4G054900/Seita.4G067200/Seita.4G105900/Seita.4G155100/Seita.4G163600/Seita.5G069100/Seita.5G249900/Seita.5G416000/Seita.5G444000/Seita.5G468100/Seita.6G005100/Seita.7G0…	37		Ci134DEG	BP	GO:0033692	cellular polysaccharide biosynthetic process	21/745	126/9983	0.000387765	0.0347402	0.0342866	Seita.1G080900/Seita.1G244200/Seita.1G318200/Seita.2G209100/Seita.3G046000/Seita.3G132100/Seita.3G133300/Seita.3G158400/Seita.3G158500/Seita.3G217800/Seita.3G235400/Seita.5G319100/Seita.5G437300/Seita.7G264400/Seita.8G128800/Seita.9G037100/Seita.9G425900/Seita.9G440600/Seita.9G441000/Seita.9G494200/Seita.9G542400	21		Ci134DEG	BP	GO:0015718	monocarboxylic acid transport	12/911	42/9983	0.00025983	0.0233548	0.0222872	Seita.2G106700/Seita.2G141700/Seita.2G167400/Seita.2G335600/Seita.2G360800/Seita.3G102000/Seita.4G231500/Seita.5G121600/Seita.5G229200/Seita.5G242900/Seita.6G118800/Seita.9G306500	12
Ci134DEG	BP	GO:0010200	response to chitin	25/1131	105/9983	0.00021799	0.0206048	0.0197837	Seita.1G034600/Seita.1G188700/Seita.1G257600/Seita.1G278900/Seita.2G156100/Seita.2G156200/Seita.2G179700/Seita.2G195200/Seita.2G206000/Seita.2G206100/Seita.3G237600/Seita.3G287100/Seita.4G067200/Seita.4G163600/Seita.4G197100/Seita.4G235200/Seita.4G277900/Seita.5G044000/Seita.5G207000/Seita.5G208300/Seita.5G249900/Seita.5G363900/Seita.7G094300/Seita.7G186400/Seita.7G217500	25		Ci134DEG	BP	GO:0044262	cellular carbohydrate metabolic process	41/745	322/9983	0.000494993	0.0424188	0.0418649	Seita.1G080900/Seita.1G112800/Seita.1G244200/Seita.1G262000/Seita.1G318200/Seita.1G323700/Seita.2G209100/Seita.2G396200/Seita.2G439200/Seita.3G046000/Seita.3G132100/Seita.3G133300/Seita.3G158400/Seita.3G158500/Seita.3G217800/Seita.3G235400/Seita.4G240700/Seita.5G053000/Seita.5G319100/Seita.5G437300/Seita.6G090000/Seita.6G094400/Seita.6G141700/Seita.7G088700/Seita.7G132000/Seita.7G257800/Seita.7G2…	41		Ci134DEG	BP	GO:0009311	oligosaccharide metabolic process	17/911	74/9983	0.000282045	0.0233548	0.0222872	Seita.1G323700/Seita.2G081000/Seita.2G188200/Seita.2G351400/Seita.2G396200/Seita.2G422000/Seita.3G176900/Seita.5G157600/Seita.5G388900/Seita.6G141700/Seita.7G159600/Seita.9G350600/Seita.9G381600/Seita.9G402500/Seita.9G410800/Seita.9G458800/Seita.9G532500	17
Ci134DEG	BP	GO:0009733	response to auxin	58/1131	326/9983	0.000289369	0.0236371	0.0226952	Seita.1G021900/Seita.1G046800/Seita.1G210300/Seita.1G228300/Seita.1G275400/Seita.1G324100/Seita.1G333100/Seita.1G356800/Seita.2G166600/Seita.2G219600/Seita.2G264800/Seita.2G400600/Seita.2G426000/Seita.3G003000/Seita.3G005500/Seita.3G033600/Seita.3G084500/Seita.3G147000/Seita.3G170100/Seita.3G194400/Seita.3G244500/Seita.3G354400/Seita.3G379400/Seita.4G006600/Seita.4G181500/Seita.5G044000/Seita.5G1…	58		Ci134DEG	BP	GO:0016051	carbohydrate biosynthetic process	31/745	223/9983	0.000542875	0.0445836	0.0440015	Seita.1G080900/Seita.1G244200/Seita.1G262000/Seita.1G318200/Seita.1G323700/Seita.1G347800/Seita.2G209100/Seita.2G263800/Seita.2G396200/Seita.3G046000/Seita.3G132100/Seita.3G133300/Seita.3G158400/Seita.3G158500/Seita.3G217800/Seita.3G235400/Seita.3G346000/Seita.4G239800/Seita.5G319100/Seita.5G437300/Seita.6G094400/Seita.6G141700/Seita.7G264400/Seita.8G128800/Seita.9G037100/Seita.9G425900/Seita.9G4…	31		Ci134DEG	BP	GO:0010167	response to nitrate	10/911	31/9983	0.000284565	0.0233548	0.0222872	Seita.1G115800/Seita.1G116100/Seita.1G218500/Seita.1G218600/Seita.1G257200/Seita.1G278500/Seita.4G175200/Seita.7G141400/Seita.8G132300/Seita.9G327900	10
Ci134DEG	BP	GO:0032787	monocarboxylic acid metabolic process	70/1131	412/9983	0.000295331	0.0236371	0.0226952	Seita.1G047500/Seita.1G069500/Seita.1G103700/Seita.1G219200/Seita.1G245800/Seita.1G265100/Seita.1G371900/Seita.2G104900/Seita.2G187800/Seita.2G187900/Seita.2G300900/Seita.2G334600/Seita.2G360500/Seita.2G400600/Seita.3G020300/Seita.3G051400/Seita.3G056400/Seita.3G096900/Seita.3G097200/Seita.3G111200/Seita.3G165200/Seita.3G170100/Seita.3G245500/Seita.3G346000/Seita.3G346200/Seita.4G021600/Seita.4G0…	70		Ci134DEG	BP	GO:1902074	response to salt	7/745	21/9983	0.00057602	0.0454134	0.0448204	Seita.3G283100/Seita.3G283600/Seita.5G394300/Seita.5G461300/Seita.7G124900/Seita.7G290600/Seita.9G198800	7		Ci134DEG	BP	GO:0009409	response to cold	54/911	368/9983	0.000288616	0.0233548	0.0222872	Seita.1G044500/Seita.1G106800/Seita.1G127200/Seita.1G267200/Seita.1G275700/Seita.1G324300/Seita.1G362000/Seita.2G053300/Seita.2G053700/Seita.2G053800/Seita.2G142500/Seita.2G156300/Seita.2G352700/Seita.2G401000/Seita.3G060000/Seita.3G095700/Seita.3G103400/Seita.3G144000/Seita.3G162400/Seita.3G248500/Seita.3G260500/Seita.3G260600/Seita.3G380200/Seita.4G025700/Seita.4G048300/Seita.4G139900/Seita.4G2…	54
Ci134DEG	BP	GO:0006833	water transport	14/1131	45/9983	0.000298403	0.0236371	0.0226952	Seita.1G025100/Seita.1G259900/Seita.1G318800/Seita.2G123200/Seita.2G123300/Seita.4G021600/Seita.4G180100/Seita.5G007300/Seita.5G007500/Seita.7G189600/Seita.8G085300/Seita.9G193500/Seita.9G268100/Seita.9G344800	14		Ci134DEG	CC	GO:0030312	external encapsulating structure	59/674	491/9955	9.47191e-06	0.00228037	0.00204739	Seita.1G079000/Seita.1G092000/Seita.1G180600/Seita.1G210300/Seita.1G295700/Seita.1G316400/Seita.1G323700/Seita.2G055300/Seita.2G079700/Seita.2G154700/Seita.2G396200/Seita.2G404000/Seita.2G439200/Seita.3G067600/Seita.3G101400/Seita.3G162800/Seita.3G177600/Seita.3G263800/Seita.3G294700/Seita.3G347500/Seita.4G210300/Seita.4G234100/Seita.4G259700/Seita.4G282500/Seita.5G053000/Seita.5G059300/Seita.5G1…	59		Ci134DEG	BP	GO:0015698	inorganic anion transport	20/911	96/9983	0.00034534	0.0268701	0.0256418	Seita.1G115800/Seita.1G116100/Seita.1G218500/Seita.1G218600/Seita.1G257200/Seita.1G275700/Seita.1G278500/Seita.3G150400/Seita.3G283100/Seita.3G406500/Seita.5G124100/Seita.5G298500/Seita.6G141000/Seita.7G157900/Seita.7G205800/Seita.7G213800/Seita.9G193500/Seita.9G235900/Seita.9G327900/Seita.9G506300	20
Ci134DEG	BP	GO:0042044	fluid transport	14/1131	45/9983	0.000298403	0.0236371	0.0226952	Seita.1G025100/Seita.1G259900/Seita.1G318800/Seita.2G123200/Seita.2G123300/Seita.4G021600/Seita.4G180100/Seita.5G007300/Seita.5G007500/Seita.7G189600/Seita.8G085300/Seita.9G193500/Seita.9G268100/Seita.9G344800	14		Ci134DEG	CC	GO:0005618	cell wall	58/674	490/9955	1.77927e-05	0.00228037	0.00204739	Seita.1G079000/Seita.1G092000/Seita.1G180600/Seita.1G210300/Seita.1G295700/Seita.1G316400/Seita.1G323700/Seita.2G055300/Seita.2G079700/Seita.2G154700/Seita.2G396200/Seita.2G404000/Seita.2G439200/Seita.3G067600/Seita.3G101400/Seita.3G162800/Seita.3G177600/Seita.3G263800/Seita.3G294700/Seita.3G347500/Seita.4G210300/Seita.4G234100/Seita.4G259700/Seita.4G282500/Seita.5G053000/Seita.5G059300/Seita.5G1…	58		Ci134DEG	BP	GO:0019684	photosynthesis, light reaction	19/911	91/9983	0.000467666	0.0350403	0.0334386	Seita.2G046600/Seita.2G202200/Seita.2G248100/Seita.2G330500/Seita.2G351600/Seita.2G352900/Seita.3G126900/Seita.3G143800/Seita.3G158600/Seita.4G099200/Seita.4G139900/Seita.4G248300/Seita.5G336700/Seita.6G005700/Seita.6G082000/Seita.7G111300/Seita.8G080900/Seita.9G177100/Seita.J002400	19
Ci134DEG	BP	GO:0071669	plant-type cell wall organization or biogenesis	48/1131	257/9983	0.000304434	0.0236371	0.0226952	Seita.1G079000/Seita.1G123400/Seita.1G123500/Seita.1G268900/Seita.1G316700/Seita.2G003000/Seita.2G044900/Seita.2G199800/Seita.2G199900/Seita.2G356200/Seita.2G382900/Seita.3G003000/Seita.3G096400/Seita.3G190400/Seita.3G270300/Seita.3G337900/Seita.3G347500/Seita.4G148700/Seita.4G223900/Seita.4G259700/Seita.5G062700/Seita.5G363400/Seita.5G434700/Seita.5G437200/Seita.5G463200/Seita.6G154200/Seita.6G2…	48		Ci134DEG	CC	GO:0031226	intrinsic component of plasma membrane	43/674	331/9955	2.51511e-05	0.00228037	0.00204739	Seita.1G020100/Seita.1G092000/Seita.1G116500/Seita.1G127700/Seita.1G256300/Seita.1G333100/Seita.2G044900/Seita.2G115900/Seita.2G154700/Seita.2G166300/Seita.2G166600/Seita.2G250200/Seita.2G327700/Seita.2G351200/Seita.2G412000/Seita.3G182000/Seita.3G193100/Seita.3G225200/Seita.3G233000/Seita.3G263800/Seita.4G005300/Seita.4G006500/Seita.4G006600/Seita.4G051900/Seita.4G098700/Seita.5G007400/Seita.5G0…	43		Ci134DEG	BP	GO:0010114	response to red light	13/911	52/9983	0.000610841	0.0441333	0.0421159	Seita.1G356800/Seita.2G053300/Seita.2G053700/Seita.2G053800/Seita.2G351600/Seita.3G126900/Seita.3G134100/Seita.4G060600/Seita.4G139900/Seita.7G116400/Seita.7G116800/Seita.7G119400/Seita.8G080900	13
Ci134DEG	BP	GO:0071555	cell wall organization	36/1131	177/9983	0.000321001	0.024064	0.0231051	Seita.1G079000/Seita.1G112800/Seita.1G316700/Seita.2G003000/Seita.2G044900/Seita.3G096400/Seita.3G190400/Seita.3G270300/Seita.3G347500/Seita.4G114200/Seita.4G148700/Seita.4G181500/Seita.4G259700/Seita.5G047800/Seita.5G062700/Seita.5G153500/Seita.5G328200/Seita.5G434700/Seita.5G463200/Seita.7G239900/Seita.7G277800/Seita.8G220400/Seita.9G183500/Seita.9G186200/Seita.9G233400/Seita.9G316400/Seita.9G3…	36		Ci134DEG	CC	GO:0046658	anchored component of plasma membrane	19/674	119/9955	0.000377386	0.0256622	0.0230404	Seita.1G092000/Seita.1G127700/Seita.1G256300/Seita.2G044900/Seita.2G154700/Seita.2G250200/Seita.2G327700/Seita.2G351200/Seita.2G412000/Seita.3G182000/Seita.3G225200/Seita.3G263800/Seita.5G263600/Seita.5G448400/Seita.8G079300/Seita.9G233400/Seita.9G363400/Seita.9G479800/Seita.9G486000	19		Ci134DEG	BP	GO:0005976	polysaccharide metabolic process	40/911	260/9983	0.000676902	0.0472198	0.0450613	Seita.1G080900/Seita.1G294300/Seita.1G301000/Seita.2G003000/Seita.2G080900/Seita.2G168000/Seita.2G209100/Seita.2G235900/Seita.2G261100/Seita.2G384400/Seita.2G422000/Seita.2G443600/Seita.3G003000/Seita.3G217800/Seita.3G275400/Seita.3G332200/Seita.4G065500/Seita.4G099300/Seita.5G069500/Seita.5G237300/Seita.5G316000/Seita.5G319100/Seita.5G384100/Seita.6G120500/Seita.6G128700/Seita.6G202800/Seita.7G1…	40
Ci134DEG	BP	GO:0009828	plant-type cell wall loosening	9/1131	22/9983	0.000374863	0.0253373	0.0243276	Seita.5G062700/Seita.9G326300/Seita.9G326600/Seita.9G326700/Seita.9G326900/Seita.9G327000/Seita.9G327100/Seita.9G577300/Seita.9G577400	9		Ci134DEG	CC	GO:0031225	anchored component of membrane	21/674	142/9955	0.000551863	0.0300213	0.0269541	Seita.1G092000/Seita.1G127700/Seita.1G256300/Seita.2G044900/Seita.2G154700/Seita.2G250200/Seita.2G327700/Seita.2G351200/Seita.2G412000/Seita.3G102200/Seita.3G182000/Seita.3G225200/Seita.3G263800/Seita.5G263600/Seita.5G448400/Seita.7G272500/Seita.8G079300/Seita.9G233400/Seita.9G363400/Seita.9G479800/Seita.9G486000	21		Ci134DEG	BP	GO:0015711	organic anion transport	35/911	219/9983	0.000716609	0.0483233	0.0461144	Seita.1G044800/Seita.1G241300/Seita.1G268000/Seita.2G106700/Seita.2G141700/Seita.2G167400/Seita.2G335600/Seita.2G352700/Seita.2G360800/Seita.3G102000/Seita.3G223500/Seita.3G406500/Seita.4G005300/Seita.4G083300/Seita.4G227300/Seita.4G231500/Seita.5G026800/Seita.5G121600/Seita.5G127600/Seita.5G145600/Seita.5G229200/Seita.5G242900/Seita.5G365100/Seita.5G387200/Seita.5G469400/Seita.6G118800/Seita.7G1…	35
Ci134DEG	BP	GO:0007568	aging	40/1131	205/9983	0.000379212	0.0253373	0.0243276	Seita.1G144700/Seita.1G166500/Seita.1G362600/Seita.2G179700/Seita.2G300900/Seita.2G309200/Seita.2G436000/Seita.2G436400/Seita.2G441700/Seita.3G120900/Seita.3G147300/Seita.3G287100/Seita.3G379400/Seita.4G017200/Seita.4G054100/Seita.4G054900/Seita.4G067200/Seita.4G105900/Seita.4G155100/Seita.4G163600/Seita.5G069100/Seita.5G104100/Seita.5G249900/Seita.5G416000/Seita.5G444000/Seita.5G468100/Seita.6G0…	40		Ci134DEG	CC	GO:0005874	microtubule	15/674	90/9955	0.000963921	0.0349095	0.0313429	Seita.1G005900/Seita.1G127700/Seita.1G235000/Seita.1G252700/Seita.2G031200/Seita.3G046100/Seita.4G069300/Seita.4G085500/Seita.4G085900/Seita.6G222800/Seita.6G237500/Seita.7G183000/Seita.7G248700/Seita.7G258800/Seita.8G146100	15		Ci134DEG	BP	GO:0018107	peptidyl-threonine phosphorylation	9/911	29/9983	0.000787718	0.0496041	0.0473366	Seita.2G206200/Seita.2G405500/Seita.3G373500/Seita.5G145700/Seita.5G340800/Seita.6G163200/Seita.7G140200/Seita.8G014400/Seita.9G411700	9
Ci134DEG	BP	GO:0006714	sesquiterpenoid metabolic process	14/1131	46/9983	0.00038486	0.0253373	0.0243276	Seita.2G104900/Seita.2G300900/Seita.2G400600/Seita.4G021600/Seita.5G315600/Seita.5G315800/Seita.7G189300/Seita.8G101900/Seita.8G168400/Seita.9G021400/Seita.9G041900/Seita.9G061300/Seita.9G061500/Seita.9G344800	14		Ci134DEG	CC	GO:0099081	supramolecular polymer	18/674	119/9955	0.00102675	0.0349095	0.0313429	Seita.1G005900/Seita.1G127700/Seita.1G235000/Seita.1G252700/Seita.2G031200/Seita.3G046100/Seita.4G069300/Seita.4G085500/Seita.4G085900/Seita.5G180900/Seita.6G222800/Seita.6G237500/Seita.7G147500/Seita.7G147600/Seita.7G183000/Seita.7G248700/Seita.7G258800/Seita.8G146100	18		Ci134DEG	BP	GO:0018210	peptidyl-threonine modification	9/911	29/9983	0.000787718	0.0496041	0.0473366	Seita.2G206200/Seita.2G405500/Seita.3G373500/Seita.5G145700/Seita.5G340800/Seita.6G163200/Seita.7G140200/Seita.8G014400/Seita.9G411700	9
Ci134DEG	BP	GO:0008300	isoprenoid catabolic process	7/1131	14/9983	0.000392608	0.0253373	0.0243276	Seita.5G157700/Seita.5G315600/Seita.5G315800/Seita.5G323400/Seita.7G189300/Seita.8G101900/Seita.9G021400	7		Ci134DEG	CC	GO:0099512	supramolecular fiber	18/674	119/9955	0.00102675	0.0349095	0.0313429	Seita.1G005900/Seita.1G127700/Seita.1G235000/Seita.1G252700/Seita.2G031200/Seita.3G046100/Seita.4G069300/Seita.4G085500/Seita.4G085900/Seita.5G180900/Seita.6G222800/Seita.6G237500/Seita.7G147500/Seita.7G147600/Seita.7G183000/Seita.7G248700/Seita.7G258800/Seita.8G146100	18		Ci134DEG	BP	GO:0034637	cellular carbohydrate biosynthetic process	27/911	156/9983	0.000833682	0.0496041	0.0473366	Seita.1G080900/Seita.1G323700/Seita.2G080900/Seita.2G168000/Seita.2G188200/Seita.2G209100/Seita.2G261100/Seita.2G396200/Seita.2G443600/Seita.3G176900/Seita.3G217800/Seita.3G332200/Seita.4G065500/Seita.4G099300/Seita.5G069500/Seita.5G237300/Seita.5G319100/Seita.6G120500/Seita.6G141700/Seita.7G192300/Seita.9G227400/Seita.9G327500/Seita.9G381600/Seita.9G416600/Seita.9G440600/Seita.9G458800/Seita.9G4…	27
Ci134DEG	BP	GO:0016106	sesquiterpenoid biosynthetic process	13/1131	41/9983	0.000396259	0.0253373	0.0243276	Seita.2G104900/Seita.2G300900/Seita.2G400600/Seita.4G021600/Seita.5G315600/Seita.5G315800/Seita.7G189300/Seita.8G101900/Seita.8G168400/Seita.9G041900/Seita.9G061300/Seita.9G061500/Seita.9G344800	13		Ci134DEG	CC	GO:0099513	polymeric cytoskeletal fiber	16/674	101/9955	0.00116361	0.0351669	0.031574	Seita.1G005900/Seita.1G127700/Seita.1G235000/Seita.1G252700/Seita.2G031200/Seita.3G046100/Seita.4G069300/Seita.4G085500/Seita.4G085900/Seita.5G180900/Seita.6G222800/Seita.6G237500/Seita.7G183000/Seita.7G248700/Seita.7G258800/Seita.8G146100	16		Ci134DEG	BP	GO:0062197	cellular response to chemical stress	27/911	156/9983	0.000833682	0.0496041	0.0473366	Seita.1G044800/Seita.1G065400/Seita.1G206500/Seita.1G272900/Seita.1G335200/Seita.2G219700/Seita.2G312300/Seita.2G352700/Seita.2G444000/Seita.3G016700/Seita.3G120200/Seita.3G126900/Seita.3G145000/Seita.3G248500/Seita.4G274700/Seita.5G001000/Seita.5G342100/Seita.5G414600/Seita.6G053800/Seita.7G023900/Seita.7G102200/Seita.7G119400/Seita.7G220500/Seita.7G225300/Seita.7G279700/Seita.9G237000/Seita.9G4…	27
Ci134DEG	BP	GO:0006873	cellular ion homeostasis	27/1131	122/9983	0.000442166	0.0274648	0.0263704	Seita.1G274100/Seita.3G006100/Seita.3G030500/Seita.3G049900/Seita.3G051000/Seita.3G260800/Seita.4G138500/Seita.4G159500/Seita.4G175000/Seita.5G000800/Seita.5G103100/Seita.5G124100/Seita.5G270400/Seita.5G455700/Seita.6G123500/Seita.7G218000/Seita.7G331800/Seita.8G118200/Seita.9G090100/Seita.9G205600/Seita.9G205700/Seita.9G205800/Seita.9G469400/Seita.9G475100/Seita.9G475300/Seita.9G533500/Seita.9G5…	27		Ci134DEG	MF	GO:0016722	oxidoreductase activity, oxidizing metal ions	15/626	36/8539	1.05178e-08	4.9749e-06	4.77174e-06	Seita.3G151800/Seita.3G218000/Seita.5G085900/Seita.5G342100/Seita.5G365900/Seita.5G377700/Seita.5G378200/Seita.7G330200/Seita.8G018100/Seita.8G210700/Seita.8G211600/Seita.8G211700/Seita.8G252500/Seita.9G192300/Seita.9G453900	15		Ci134DEG	CC	GO:0034357	photosynthetic membrane	54/853	244/9955	4.36585e-11	5.5228e-09	5.12413e-09	Seita.1G102500/Seita.1G251800/Seita.2G029500/Seita.2G035400/Seita.2G046600/Seita.2G053300/Seita.2G053700/Seita.2G053800/Seita.2G066600/Seita.2G163700/Seita.2G202200/Seita.2G236000/Seita.2G248100/Seita.2G283000/Seita.2G285600/Seita.2G330500/Seita.2G343000/Seita.2G351600/Seita.2G352900/Seita.3G143800/Seita.3G144000/Seita.3G158600/Seita.3G224900/Seita.4G099200/Seita.4G139900/Seita.4G207000/Seita.5G0…	54
Ci134DEG	BP	GO:1901617	organic hydroxy compound biosynthetic process	33/1131	162/9983	0.000544255	0.0328669	0.0315572	Seita.1G157400/Seita.1G287200/Seita.2G039800/Seita.2G079200/Seita.2G104900/Seita.2G229900/Seita.2G300900/Seita.2G400600/Seita.3G020300/Seita.3G116300/Seita.4G021600/Seita.4G169900/Seita.5G139200/Seita.5G340800/Seita.5G434700/Seita.6G011600/Seita.6G011900/Seita.6G012200/Seita.6G125000/Seita.6G208200/Seita.7G079000/Seita.7G204200/Seita.7G318000/Seita.8G014200/Seita.8G136000/Seita.8G136400/Seita.8G1…	33		Ci134DEG	MF	GO:0015171	amino acid transmembrane transporter activity	18/626	61/8539	1.93992e-07	4.58791e-05	4.40056e-05	Seita.1G268000/Seita.1G333100/Seita.2G090200/Seita.3G223500/Seita.4G005300/Seita.4G006500/Seita.4G006600/Seita.4G161300/Seita.5G026800/Seita.5G365100/Seita.5G387200/Seita.7G037100/Seita.7G125900/Seita.7G298300/Seita.8G047400/Seita.9G299000/Seita.9G311800/Seita.9G431100	18		Ci134DEG	CC	GO:0042651	thylakoid membrane	54/853	244/9955	4.36585e-11	5.5228e-09	5.12413e-09	Seita.1G102500/Seita.1G251800/Seita.2G029500/Seita.2G035400/Seita.2G046600/Seita.2G053300/Seita.2G053700/Seita.2G053800/Seita.2G066600/Seita.2G163700/Seita.2G202200/Seita.2G236000/Seita.2G248100/Seita.2G283000/Seita.2G285600/Seita.2G330500/Seita.2G343000/Seita.2G351600/Seita.2G352900/Seita.3G143800/Seita.3G144000/Seita.3G158600/Seita.3G224900/Seita.4G099200/Seita.4G139900/Seita.4G207000/Seita.5G0…	54
Ci134DEG	BP	GO:0009664	plant-type cell wall organization	27/1131	125/9983	0.000661268	0.0344778	0.0331039	Seita.1G079000/Seita.1G316700/Seita.2G003000/Seita.2G044900/Seita.3G096400/Seita.3G190400/Seita.3G270300/Seita.3G347500/Seita.4G148700/Seita.4G259700/Seita.5G062700/Seita.5G434700/Seita.5G463200/Seita.7G277800/Seita.8G220400/Seita.9G186200/Seita.9G316400/Seita.9G326300/Seita.9G326600/Seita.9G326700/Seita.9G326900/Seita.9G327000/Seita.9G327100/Seita.9G333500/Seita.9G441000/Seita.9G577300/Seita.9G5…	27		Ci134DEG	MF	GO:0004553	hydrolase activity, hydrolyzing O-glycosyl compounds	33/626	228/8539	0.000117754	0.0185659	0.0178078	Seita.1G092000/Seita.1G323700/Seita.2G044900/Seita.2G081000/Seita.2G254100/Seita.2G279000/Seita.2G327700/Seita.2G396200/Seita.2G439200/Seita.3G182000/Seita.3G225200/Seita.3G263800/Seita.3G270400/Seita.4G234100/Seita.5G117400/Seita.5G356600/Seita.5G448400/Seita.6G011100/Seita.6G141700/Seita.7G234500/Seita.7G257800/Seita.8G079300/Seita.8G206900/Seita.8G230000/Seita.9G021900/Seita.9G043300/Seita.9G0…	33		Ci134DEG	CC	GO:0055035	plastid thylakoid membrane	52/853	233/9955	7.28174e-11	6.14093e-09	5.69764e-09	Seita.1G102500/Seita.1G251800/Seita.2G029500/Seita.2G035400/Seita.2G046600/Seita.2G053300/Seita.2G053700/Seita.2G053800/Seita.2G066600/Seita.2G163700/Seita.2G202200/Seita.2G236000/Seita.2G248100/Seita.2G283000/Seita.2G285600/Seita.2G330500/Seita.2G343000/Seita.2G351600/Seita.2G352900/Seita.3G143800/Seita.3G144000/Seita.4G099200/Seita.4G139900/Seita.4G207000/Seita.5G040100/Seita.5G172700/Seita.5G2…	52
Ci134DEG	BP	GO:0072529	pyrimidine-containing compound catabolic process	7/1131	15/9983	0.000664456	0.0344778	0.0331039	Seita.1G123600/Seita.1G224700/Seita.2G133200/Seita.2G316000/Seita.5G353700/Seita.6G243800/Seita.8G233600	7		Ci134DEG	MF	GO:0005200	structural constituent of cytoskeleton	8/626	24/8539	0.00020427	0.0202031	0.0193781	Seita.5G025500/Seita.5G026400/Seita.5G028100/Seita.7G147500/Seita.7G147600/Seita.7G163400/Seita.9G115300/Seita.9G148700	8		Ci134DEG	CC	GO:0031976	plastid thylakoid	60/853	297/9955	1.85957e-10	1.17618e-08	1.09127e-08	Seita.1G102500/Seita.1G123800/Seita.1G251800/Seita.2G029500/Seita.2G035400/Seita.2G046600/Seita.2G053300/Seita.2G053700/Seita.2G053800/Seita.2G066600/Seita.2G163700/Seita.2G202200/Seita.2G236000/Seita.2G248100/Seita.2G283000/Seita.2G285600/Seita.2G330500/Seita.2G343000/Seita.2G351600/Seita.2G352900/Seita.3G143800/Seita.3G144000/Seita.3G224900/Seita.4G099200/Seita.4G139900/Seita.4G207000/Seita.5G0…	60
Ci134DEG	BP	GO:0071554	cell wall organization or biogenesis	68/1131	409/9983	0.00066601	0.0344778	0.0331039	Seita.1G079000/Seita.1G112800/Seita.1G123400/Seita.1G123500/Seita.1G268900/Seita.1G316700/Seita.2G003000/Seita.2G044900/Seita.2G199800/Seita.2G199900/Seita.2G356200/Seita.2G382900/Seita.2G414200/Seita.3G003000/Seita.3G096400/Seita.3G134300/Seita.3G190400/Seita.3G270300/Seita.3G337900/Seita.3G347500/Seita.4G114200/Seita.4G120400/Seita.4G148700/Seita.4G181500/Seita.4G223900/Seita.4G259700/Seita.5G0…	68		Ci134DEG	MF	GO:0008509	anion transmembrane transporter activity	34/626	245/8539	0.000213564	0.0202031	0.0193781	Seita.1G241300/Seita.1G268000/Seita.1G333100/Seita.1G360400/Seita.2G090200/Seita.2G335600/Seita.2G352700/Seita.3G223500/Seita.3G283100/Seita.3G283600/Seita.4G005300/Seita.4G006500/Seita.4G006600/Seita.4G138500/Seita.4G161300/Seita.4G231500/Seita.5G026800/Seita.5G198500/Seita.5G326900/Seita.5G365100/Seita.5G387200/Seita.5G461300/Seita.6G058300/Seita.7G037100/Seita.7G125900/Seita.7G169400/Seita.7G2…	34		Ci134DEG	CC	GO:0009535	chloroplast thylakoid membrane	50/853	227/9955	2.79177e-10	1.41264e-08	1.31066e-08	Seita.1G102500/Seita.1G251800/Seita.2G029500/Seita.2G035400/Seita.2G046600/Seita.2G053300/Seita.2G053700/Seita.2G053800/Seita.2G066600/Seita.2G163700/Seita.2G202200/Seita.2G236000/Seita.2G248100/Seita.2G283000/Seita.2G330500/Seita.2G343000/Seita.2G351600/Seita.2G352900/Seita.3G143800/Seita.3G144000/Seita.4G099200/Seita.4G139900/Seita.4G207000/Seita.5G040100/Seita.5G172700/Seita.5G215600/Seita.5G2…	50
Ci134DEG	BP	GO:0001763	morphogenesis of a branching structure	11/1131	33/9983	0.000684397	0.0344778	0.0331039	Seita.5G095700/Seita.5G285100/Seita.5G285200/Seita.5G315600/Seita.5G315800/Seita.5G387200/Seita.6G064400/Seita.7G189300/Seita.8G101900/Seita.8G168400/Seita.9G165600	11		Ci134DEG	MF	GO:0015075	ion transmembrane transporter activity	57/626	495/8539	0.000366939	0.0261239	0.0250571	Seita.1G019500/Seita.1G020100/Seita.1G141800/Seita.1G241300/Seita.1G268000/Seita.1G272900/Seita.1G333100/Seita.1G360400/Seita.2G090200/Seita.2G335600/Seita.2G352200/Seita.2G352700/Seita.3G193100/Seita.3G208000/Seita.3G209900/Seita.3G223500/Seita.3G233000/Seita.3G283100/Seita.3G283600/Seita.3G357700/Seita.4G005300/Seita.4G006500/Seita.4G006600/Seita.4G138500/Seita.4G161300/Seita.4G181500/Seita.4G2…	57		Ci134DEG	CC	GO:0009534	chloroplast thylakoid	58/853	293/9955	8.59602e-10	3.62466e-08	3.36301e-08	Seita.1G102500/Seita.1G123800/Seita.1G251800/Seita.2G029500/Seita.2G035400/Seita.2G046600/Seita.2G053300/Seita.2G053700/Seita.2G053800/Seita.2G066600/Seita.2G163700/Seita.2G202200/Seita.2G236000/Seita.2G248100/Seita.2G283000/Seita.2G330500/Seita.2G343000/Seita.2G351600/Seita.2G352900/Seita.3G143800/Seita.3G144000/Seita.3G224900/Seita.4G099200/Seita.4G139900/Seita.4G207000/Seita.5G040100/Seita.5G1…	58
Ci134DEG	BP	GO:0010223	secondary shoot formation	11/1131	33/9983	0.000684397	0.0344778	0.0331039	Seita.5G095700/Seita.5G285100/Seita.5G285200/Seita.5G315600/Seita.5G315800/Seita.5G387200/Seita.6G064400/Seita.7G189300/Seita.8G101900/Seita.8G168400/Seita.9G165600	11		Ci134DEG	MF	GO:0005342	organic acid transmembrane transporter activity	21/626	130/8539	0.000463987	0.0261239	0.0250571	Seita.1G268000/Seita.1G333100/Seita.2G090200/Seita.2G335600/Seita.3G223500/Seita.4G005300/Seita.4G006500/Seita.4G006600/Seita.4G161300/Seita.4G231500/Seita.5G026800/Seita.5G365100/Seita.5G387200/Seita.7G037100/Seita.7G125900/Seita.7G298300/Seita.8G047400/Seita.9G161200/Seita.9G299000/Seita.9G311800/Seita.9G431100	21		Ci134DEG	CC	GO:0009579	thylakoid	65/853	359/9955	3.75322e-09	1.35652e-07	1.2586e-07	Seita.1G102500/Seita.1G123800/Seita.1G251800/Seita.1G324300/Seita.1G364200/Seita.2G029500/Seita.2G035400/Seita.2G046600/Seita.2G053300/Seita.2G053700/Seita.2G053800/Seita.2G066600/Seita.2G163700/Seita.2G202200/Seita.2G236000/Seita.2G248100/Seita.2G283000/Seita.2G285600/Seita.2G330500/Seita.2G343000/Seita.2G351600/Seita.2G352900/Seita.3G143800/Seita.3G144000/Seita.3G158600/Seita.3G224900/Seita.4G0…	65
Ci134DEG	BP	GO:0010346	shoot axis formation	11/1131	33/9983	0.000684397	0.0344778	0.0331039	Seita.5G095700/Seita.5G285100/Seita.5G285200/Seita.5G315600/Seita.5G315800/Seita.5G387200/Seita.6G064400/Seita.7G189300/Seita.8G101900/Seita.8G168400/Seita.9G165600	11		Ci134DEG	MF	GO:0046943	carboxylic acid transmembrane transporter activity	21/626	130/8539	0.000463987	0.0261239	0.0250571	Seita.1G268000/Seita.1G333100/Seita.2G090200/Seita.2G335600/Seita.3G223500/Seita.4G005300/Seita.4G006500/Seita.4G006600/Seita.4G161300/Seita.4G231500/Seita.5G026800/Seita.5G365100/Seita.5G387200/Seita.7G037100/Seita.7G125900/Seita.7G298300/Seita.8G047400/Seita.9G161200/Seita.9G299000/Seita.9G311800/Seita.9G431100	21		Ci134DEG	CC	GO:0010287	plastoglobule	15/853	47/9955	4.80065e-06	0.000151821	0.000140861	Seita.1G123800/Seita.2G029500/Seita.2G351600/Seita.2G352900/Seita.3G143800/Seita.4G139900/Seita.5G166000/Seita.7G056200/Seita.8G080900/Seita.8G173800/Seita.9G124200/Seita.9G177100/Seita.9G191500/Seita.9G195600/Seita.9G195900	15
Ci134DEG	BP	GO:0009753	response to jasmonic acid	40/1131	211/9983	0.000692987	0.0344778	0.0331039	Seita.1G275400/Seita.1G324800/Seita.2G145800/Seita.2G145900/Seita.2G156200/Seita.2G217500/Seita.2G278500/Seita.2G400600/Seita.3G120900/Seita.3G287100/Seita.3G379400/Seita.4G091600/Seita.4G105900/Seita.5G044000/Seita.5G047800/Seita.5G257200/Seita.5G421200/Seita.5G451100/Seita.6G011600/Seita.6G011900/Seita.6G012200/Seita.6G023100/Seita.6G055700/Seita.6G100500/Seita.6G101900/Seita.6G190300/Seita.7G0…	40		Ci134DEG	MF	GO:0008514	organic anion transmembrane transporter activity	25/626	168/8539	0.00050649	0.0261239	0.0250571	Seita.1G241300/Seita.1G268000/Seita.1G333100/Seita.2G090200/Seita.2G335600/Seita.2G352700/Seita.3G223500/Seita.4G005300/Seita.4G006500/Seita.4G006600/Seita.4G161300/Seita.4G231500/Seita.5G026800/Seita.5G365100/Seita.5G387200/Seita.7G037100/Seita.7G125900/Seita.7G169400/Seita.7G298300/Seita.8G047400/Seita.9G136100/Seita.9G161200/Seita.9G299000/Seita.9G311800/Seita.9G431100	25		Ci134DEG	CC	GO:0031226	intrinsic component of plasma membrane	53/853	331/9955	5.49052e-06	0.000154344	0.000143203	Seita.1G020100/Seita.1G135500/Seita.1G135700/Seita.1G159600/Seita.2G154700/Seita.2G199500/Seita.2G291500/Seita.2G292400/Seita.3G008300/Seita.3G082100/Seita.3G146800/Seita.3G225200/Seita.3G263800/Seita.3G315000/Seita.3G333100/Seita.4G005300/Seita.4G083300/Seita.4G110300/Seita.4G160700/Seita.5G043400/Seita.5G079300/Seita.5G096100/Seita.5G124100/Seita.5G218600/Seita.5G263600/Seita.5G284900/Seita.5G2…	53
Ci134DEG	BP	GO:0044550	secondary metabolite biosynthetic process	41/1131	218/9983	0.000705422	0.0344778	0.0331039	Seita.1G064000/Seita.1G219200/Seita.2G132800/Seita.2G145700/Seita.2G145800/Seita.2G145900/Seita.2G147600/Seita.2G219600/Seita.2G224300/Seita.2G278500/Seita.2G283800/Seita.3G142500/Seita.3G339800/Seita.4G021600/Seita.4G181500/Seita.4G216300/Seita.4G235500/Seita.4G235600/Seita.5G047800/Seita.5G257200/Seita.5G386300/Seita.5G434700/Seita.6G023100/Seita.6G093400/Seita.6G100500/Seita.6G101900/Seita.6G1…	41		Ci134DEG	MF	GO:0015318	inorganic molecular entity transmembrane transporter activity	56/626	492/8539	0.000552302	0.0261239	0.0250571	Seita.1G019500/Seita.1G020100/Seita.1G141800/Seita.1G268000/Seita.1G272900/Seita.1G333100/Seita.1G360400/Seita.2G090200/Seita.2G335600/Seita.2G352200/Seita.3G193100/Seita.3G208000/Seita.3G209900/Seita.3G223500/Seita.3G233000/Seita.3G283100/Seita.3G283600/Seita.3G357700/Seita.4G005300/Seita.4G006500/Seita.4G006600/Seita.4G098700/Seita.4G138500/Seita.4G161300/Seita.4G181500/Seita.4G231500/Seita.5G0…	56		Ci134DEG	CC	GO:0009941	chloroplast envelope	63/853	430/9955	1.42741e-05	0.000361134	0.000335065	Seita.1G123800/Seita.1G206500/Seita.1G253900/Seita.1G272900/Seita.1G354800/Seita.1G380300/Seita.2G029500/Seita.2G046600/Seita.2G108400/Seita.2G141700/Seita.2G151800/Seita.2G209700/Seita.2G235900/Seita.2G248100/Seita.2G283000/Seita.2G312300/Seita.2G330500/Seita.2G351600/Seita.2G352900/Seita.2G401000/Seita.3G102000/Seita.3G143800/Seita.3G144000/Seita.3G175700/Seita.4G099200/Seita.4G139900/Seita.4G1…	63
Ci134DEG	BP	GO:0010150	leaf senescence	34/1131	171/9983	0.000713661	0.0344778	0.0331039	Seita.1G144700/Seita.1G166500/Seita.1G362600/Seita.2G179700/Seita.2G300900/Seita.2G309200/Seita.2G436000/Seita.2G436400/Seita.2G441700/Seita.3G120900/Seita.3G287100/Seita.3G379400/Seita.4G017200/Seita.4G054100/Seita.4G054900/Seita.4G067200/Seita.4G105900/Seita.4G163600/Seita.5G069100/Seita.5G249900/Seita.5G416000/Seita.5G444000/Seita.5G468100/Seita.7G038400/Seita.7G078900/Seita.7G124900/Seita.7G2…	34		Ci134DEG	MF	GO:0016798	hydrolase activity, acting on glycosyl bonds	33/626	249/8539	0.000612827	0.0263515	0.0252754	Seita.1G092000/Seita.1G323700/Seita.2G044900/Seita.2G081000/Seita.2G254100/Seita.2G279000/Seita.2G327700/Seita.2G396200/Seita.2G439200/Seita.3G182000/Seita.3G225200/Seita.3G263800/Seita.3G270400/Seita.4G234100/Seita.5G117400/Seita.5G356600/Seita.5G448400/Seita.6G011100/Seita.6G141700/Seita.7G234500/Seita.7G257800/Seita.8G079300/Seita.8G206900/Seita.8G230000/Seita.9G021900/Seita.9G043300/Seita.9G0…	33		Ci134DEG	CC	GO:0009526	plastid envelope	65/853	451/9955	1.78076e-05	0.000409576	0.00038001	Seita.1G123800/Seita.1G206500/Seita.1G253900/Seita.1G265600/Seita.1G272900/Seita.1G354800/Seita.1G380300/Seita.2G029500/Seita.2G046600/Seita.2G108400/Seita.2G141700/Seita.2G151800/Seita.2G209700/Seita.2G235900/Seita.2G248100/Seita.2G283000/Seita.2G312300/Seita.2G330500/Seita.2G351600/Seita.2G352900/Seita.2G401000/Seita.3G102000/Seita.3G143800/Seita.3G144000/Seita.3G175700/Seita.4G099200/Seita.4G1…	65
Ci134DEG	BP	GO:0120178	steroid hormone biosynthetic process	9/1131	24/9983	0.000798787	0.0377514	0.036247	Seita.2G039800/Seita.2G229900/Seita.3G116300/Seita.5G139200/Seita.7G204200/Seita.7G318000/Seita.8G166500/Seita.9G021400/Seita.9G173500	9		Ci603DEG	BP	GO:0009734	auxin-activated signaling pathway	29/839	142/9983	5.44298e-06	0.00594171	0.00570653	Seita.1G116500/Seita.1G116600/Seita.1G317400/Seita.1G324100/Seita.1G333100/Seita.2G166600/Seita.3G244500/Seita.3G379400/Seita.3G393100/Seita.4G005300/Seita.4G006500/Seita.4G006600/Seita.4G083300/Seita.4G101300/Seita.4G288100/Seita.5G079300/Seita.5G126200/Seita.5G241500/Seita.5G351800/Seita.6G251100/Seita.6G253500/Seita.7G123300/Seita.7G141400/Seita.7G212900/Seita.7G224300/Seita.7G258700/Seita.7G3…	29		Ci134DEG	CC	GO:0046658	anchored component of plasma membrane	23/853	119/9955	0.000162788	0.00343211	0.00318436	Seita.1G159600/Seita.2G154700/Seita.2G199500/Seita.2G292400/Seita.3G008300/Seita.3G146800/Seita.3G225200/Seita.3G263800/Seita.3G315000/Seita.5G263600/Seita.5G357100/Seita.5G448000/Seita.5G448500/Seita.6G003500/Seita.6G110400/Seita.6G113100/Seita.6G202800/Seita.9G060800/Seita.9G112400/Seita.9G145500/Seita.9G373900/Seita.9G479800/Seita.J002600	23
Ci134DEG	BP	GO:0050801	ion homeostasis	40/1131	214/9983	0.000923021	0.0422957	0.0406103	Seita.1G019500/Seita.1G256100/Seita.1G263000/Seita.1G274100/Seita.1G333100/Seita.2G090300/Seita.2G277900/Seita.2G309200/Seita.3G006100/Seita.3G030500/Seita.3G049900/Seita.3G051000/Seita.3G097600/Seita.3G243800/Seita.3G260800/Seita.3G375800/Seita.3G391700/Seita.4G138500/Seita.4G159500/Seita.4G175000/Seita.4G268700/Seita.5G000800/Seita.5G103100/Seita.5G124100/Seita.5G270400/Seita.5G455700/Seita.6G1…	40		Ci603DEG	BP	GO:0009834	plant-type secondary cell wall biogenesis	19/839	73/9983	6.08782e-06	0.00594171	0.00570653	Seita.1G116500/Seita.1G251900/Seita.1G281500/Seita.2G200100/Seita.2G200200/Seita.3G136800/Seita.3G158400/Seita.3G158500/Seita.3G235400/Seita.3G350800/Seita.4G255400/Seita.5G242700/Seita.5G437300/Seita.6G086100/Seita.6G251100/Seita.7G181500/Seita.7G220500/Seita.7G272500/Seita.9G113200	19		Ci134DEG	CC	GO:0031225	anchored component of membrane	25/853	142/9955	0.000393808	0.00766411	0.00711087	Seita.1G159600/Seita.2G154700/Seita.2G199500/Seita.2G292400/Seita.3G008300/Seita.3G102200/Seita.3G146800/Seita.3G225200/Seita.3G263800/Seita.3G315000/Seita.5G122100/Seita.5G263600/Seita.5G357100/Seita.5G448000/Seita.5G448500/Seita.6G003500/Seita.6G110400/Seita.6G113100/Seita.6G202800/Seita.9G060800/Seita.9G112400/Seita.9G145500/Seita.9G373900/Seita.9G479800/Seita.J002600	25
Ci134DEG	BP	GO:1901615	organic hydroxy compound metabolic process	49/1131	277/9983	0.000949407	0.0422957	0.0406103	Seita.1G047500/Seita.1G157400/Seita.1G238400/Seita.1G287200/Seita.1G362600/Seita.2G039800/Seita.2G079200/Seita.2G104900/Seita.2G229900/Seita.2G300900/Seita.2G400600/Seita.3G020300/Seita.3G096900/Seita.3G097200/Seita.3G116300/Seita.3G165800/Seita.3G201500/Seita.3G346200/Seita.4G021600/Seita.4G169900/Seita.5G139200/Seita.5G340800/Seita.5G434700/Seita.6G011600/Seita.6G011900/Seita.6G012200/Seita.6G0…	49		Ci603DEG	BP	GO:0071365	cellular response to auxin stimulus	30/839	159/9983	1.95351e-05	0.0124143	0.0119229	Seita.1G116500/Seita.1G116600/Seita.1G317400/Seita.1G324100/Seita.1G333100/Seita.2G166600/Seita.3G244500/Seita.3G379400/Seita.3G393100/Seita.4G005300/Seita.4G006500/Seita.4G006600/Seita.4G083300/Seita.4G101300/Seita.4G288100/Seita.5G079300/Seita.5G126200/Seita.5G241500/Seita.5G351800/Seita.5G403700/Seita.6G251100/Seita.6G253500/Seita.7G123300/Seita.7G141400/Seita.7G212900/Seita.7G224300/Seita.7G2…	30		Ci134DEG	CC	GO:0048046	apoplast	34/853	226/9955	0.000835536	0.0150993	0.0140094	Seita.1G170500/Seita.1G245800/Seita.1G324300/Seita.2G003000/Seita.2G168000/Seita.2G343000/Seita.2G401000/Seita.3G130700/Seita.3G263800/Seita.3G315000/Seita.3G369800/Seita.4G025700/Seita.4G075600/Seita.4G191200/Seita.4G245500/Seita.4G281500/Seita.5G014300/Seita.5G240000/Seita.5G240100/Seita.5G246700/Seita.5G329900/Seita.5G377200/Seita.5G448000/Seita.5G448500/Seita.5G467000/Seita.6G120500/Seita.7G1…	34
Ci134DEG	BP	GO:0016132	brassinosteroid biosynthetic process	8/1131	20/9983	0.000953308	0.0422957	0.0406103	Seita.2G229900/Seita.3G116300/Seita.5G139200/Seita.7G204200/Seita.7G318000/Seita.8G166500/Seita.9G021400/Seita.9G173500	8		Ci603DEG	BP	GO:2000652	regulation of secondary cell wall biogenesis	10/839	26/9983	2.54391e-05	0.0124143	0.0119229	Seita.1G251900/Seita.1G281500/Seita.2G200100/Seita.2G200200/Seita.3G136800/Seita.3G350800/Seita.5G242700/Seita.7G181500/Seita.7G220500/Seita.9G113200	10		Ci134DEG	CC	GO:0005618	cell wall	62/853	490/9955	0.00107514	0.0178945	0.0166028	Seita.1G210300/Seita.1G323700/Seita.1G335200/Seita.1G380000/Seita.2G003000/Seita.2G134000/Seita.2G154700/Seita.2G188200/Seita.2G193900/Seita.2G199500/Seita.2G218700/Seita.2G261100/Seita.2G396200/Seita.2G434300/Seita.3G146800/Seita.3G161900/Seita.3G162000/Seita.3G177600/Seita.3G263800/Seita.3G315000/Seita.3G373000/Seita.4G160700/Seita.4G210300/Seita.4G234100/Seita.5G035200/Seita.5G046600/Seita.5G0…	62
Ci134DEG	BP	GO:0009624	response to nematode	21/1131	91/9983	0.00104596	0.0448872	0.0430985	Seita.2G026700/Seita.2G260700/Seita.2G441700/Seita.4G106500/Seita.5G022400/Seita.5G039100/Seita.6G020900/Seita.7G043900/Seita.7G064100/Seita.7G064200/Seita.7G076700/Seita.7G076800/Seita.7G185900/Seita.7G228200/Seita.7G298300/Seita.9G226700/Seita.9G275500/Seita.9G275600/Seita.9G341200/Seita.9G416600/Seita.9G471700	21		Ci603DEG	BP	GO:0003333	amino acid transmembrane transport	16/839	64/9983	5.58704e-05	0.018166	0.0174469	Seita.1G333100/Seita.3G223500/Seita.3G323900/Seita.4G005300/Seita.4G006500/Seita.4G006600/Seita.4G083300/Seita.4G208500/Seita.5G365100/Seita.5G387200/Seita.7G037100/Seita.7G298300/Seita.9G277500/Seita.9G299000/Seita.9G311700/Seita.9G431100	16		Ci134DEG	CC	GO:0030312	external encapsulating structure	62/853	491/9955	0.00113167	0.0178945	0.0166028	Seita.1G210300/Seita.1G323700/Seita.1G335200/Seita.1G380000/Seita.2G003000/Seita.2G134000/Seita.2G154700/Seita.2G188200/Seita.2G193900/Seita.2G199500/Seita.2G218700/Seita.2G261100/Seita.2G396200/Seita.2G434300/Seita.3G146800/Seita.3G161900/Seita.3G162000/Seita.3G177600/Seita.3G263800/Seita.3G315000/Seita.3G373000/Seita.4G160700/Seita.4G210300/Seita.4G234100/Seita.5G035200/Seita.5G046600/Seita.5G0…	62
Ci134DEG	BP	GO:0016115	terpenoid catabolic process	6/1131	12/9983	0.00105301	0.0448872	0.0430985	Seita.5G157700/Seita.5G315600/Seita.5G315800/Seita.5G323400/Seita.8G101900/Seita.9G021400	6		Ci603DEG	BP	GO:0006865	amino acid transport	16/839	64/9983	5.58704e-05	0.018166	0.0174469	Seita.1G333100/Seita.3G223500/Seita.3G323900/Seita.4G005300/Seita.4G006500/Seita.4G006600/Seita.4G083300/Seita.4G208500/Seita.5G365100/Seita.5G387200/Seita.7G037100/Seita.7G298300/Seita.9G277500/Seita.9G299000/Seita.9G311700/Seita.9G431100	16		Ci134DEG	CC	GO:0042170	plastid membrane	20/853	117/9955	0.0020957	0.0298794	0.0277225	Seita.1G123800/Seita.1G354800/Seita.2G046600/Seita.2G108400/Seita.2G209700/Seita.3G102000/Seita.3G144000/Seita.5G002900/Seita.5G026800/Seita.5G040100/Seita.5G121600/Seita.5G362100/Seita.5G461800/Seita.5G469400/Seita.6G208200/Seita.7G217800/Seita.9G306500/Seita.9G418200/Seita.9G431100/Seita.9G460000	20
Ci134DEG	BP	GO:0045229	external encapsulating structure organization	39/1131	209/9983	0.00109856	0.0459282	0.044098	Seita.1G079000/Seita.1G112800/Seita.1G316700/Seita.2G003000/Seita.2G044900/Seita.3G096400/Seita.3G190400/Seita.3G270300/Seita.3G347500/Seita.4G114200/Seita.4G148700/Seita.4G181500/Seita.4G259700/Seita.5G047800/Seita.5G062700/Seita.5G153500/Seita.5G287400/Seita.5G328200/Seita.5G434700/Seita.5G463200/Seita.6G098800/Seita.7G239900/Seita.7G277800/Seita.7G318000/Seita.8G220400/Seita.9G183500/Seita.9G1…	39		Ci603DEG	BP	GO:1903338	regulation of cell wall organization or biogenesis	11/839	34/9983	6.51443e-05	0.018166	0.0174469	Seita.1G251900/Seita.1G281500/Seita.2G200100/Seita.2G200200/Seita.3G136800/Seita.3G350800/Seita.5G242700/Seita.5G383300/Seita.7G181500/Seita.7G220500/Seita.9G113200	11		Ci134DEG	CC	GO:0031969	chloroplast membrane	19/853	109/9955	0.00212581	0.0298794	0.0277225	Seita.1G123800/Seita.1G354800/Seita.2G046600/Seita.2G108400/Seita.2G209700/Seita.3G102000/Seita.3G144000/Seita.5G002900/Seita.5G026800/Seita.5G040100/Seita.5G121600/Seita.5G362100/Seita.5G461800/Seita.5G469400/Seita.7G217800/Seita.9G306500/Seita.9G418200/Seita.9G431100/Seita.9G460000	19
Ci134DEG	BP	GO:0010143	cutin biosynthetic process	10/1131	30/9983	0.00119435	0.0486267	0.046689	Seita.1G116700/Seita.3G051400/Seita.3G165200/Seita.4G021600/Seita.5G386400/Seita.6G164700/Seita.8G005700/Seita.8G234000/Seita.9G101700/Seita.9G344800	10		Ci603DEG	BP	GO:0071554	cell wall organization or biogenesis	57/839	409/9983	8.8516e-05	0.0215979	0.020743	Seita.1G116500/Seita.1G251900/Seita.1G281500/Seita.1G294300/Seita.2G044900/Seita.2G072100/Seita.2G200100/Seita.2G200200/Seita.2G313800/Seita.2G314800/Seita.2G347800/Seita.2G380300/Seita.2G404000/Seita.3G136800/Seita.3G158400/Seita.3G158500/Seita.3G176900/Seita.3G190400/Seita.3G235400/Seita.3G270300/Seita.3G332200/Seita.3G347500/Seita.3G350800/Seita.4G086700/Seita.4G227100/Seita.4G255400/Seita.4G2…	57		Ci134DEG	CC	GO:0009528	plastid inner membrane	10/853	44/9955	0.00341123	0.0454233	0.0421443	Seita.1G123800/Seita.2G209700/Seita.3G102000/Seita.3G144000/Seita.5G040100/Seita.5G121600/Seita.5G362100/Seita.5G461800/Seita.7G217800/Seita.9G306500	10
Ci134DEG	BP	GO:0042592	homeostatic process	68/1131	418/9983	0.00120784	0.0486267	0.046689	Seita.1G019500/Seita.1G228300/Seita.1G256100/Seita.1G263000/Seita.1G274100/Seita.1G333100/Seita.2G090300/Seita.2G229900/Seita.2G264800/Seita.2G277900/Seita.2G309200/Seita.3G006100/Seita.3G030500/Seita.3G049900/Seita.3G051000/Seita.3G089400/Seita.3G097600/Seita.3G116300/Seita.3G201500/Seita.3G243800/Seita.3G260800/Seita.3G312900/Seita.3G375800/Seita.3G391700/Seita.4G138500/Seita.4G159500/Seita.4G1…	68		Ci603DEG	BP	GO:0009765	photosynthesis, light harvesting	8/839	20/9983	0.000121391	0.0263283	0.0252862	Seita.2G046600/Seita.2G217800/Seita.2G351600/Seita.2G352900/Seita.3G143800/Seita.4G139900/Seita.8G080900/Seita.9G177100	8		Ci134DEG	CC	GO:0005887	integral component of plasma membrane	30/853	211/9955	0.00393422	0.0497679	0.0461753	Seita.1G020100/Seita.1G135500/Seita.1G135700/Seita.2G291500/Seita.3G082100/Seita.3G333100/Seita.4G005300/Seita.4G083300/Seita.4G110300/Seita.4G160700/Seita.5G043400/Seita.5G079300/Seita.5G096100/Seita.5G124100/Seita.5G218600/Seita.5G284900/Seita.5G298500/Seita.5G341100/Seita.5G403300/Seita.6G141000/Seita.7G033300/Seita.7G102400/Seita.7G194000/Seita.7G199400/Seita.7G228200/Seita.7G316000/Seita.9G1…	30
Ci134DEG	CC	GO:0031226	intrinsic component of plasma membrane	76/1037	331/9955	1.33552e-11	3.64598e-09	3.64598e-09	Seita.1G025100/Seita.1G127700/Seita.1G135500/Seita.1G159600/Seita.1G237300/Seita.1G256300/Seita.1G259900/Seita.1G318800/Seita.1G333100/Seita.2G044900/Seita.2G123200/Seita.2G123300/Seita.2G166600/Seita.2G260700/Seita.2G351200/Seita.3G005500/Seita.3G076900/Seita.3G077500/Seita.3G146800/Seita.3G194400/Seita.3G225200/Seita.3G244500/Seita.3G263500/Seita.3G315000/Seita.4G006600/Seita.4G169700/Seita.4G1…	76		Ci603DEG	BP	GO:0080167	response to karrikin	25/839	136/9983	0.000145959	0.0284913	0.0273635	Seita.1G043800/Seita.1G332100/Seita.1G346600/Seita.2G081000/Seita.2G335600/Seita.3G270200/Seita.3G393100/Seita.3G406500/Seita.4G096400/Seita.4G232000/Seita.4G276400/Seita.5G274700/Seita.6G007700/Seita.6G157400/Seita.6G193700/Seita.7G149800/Seita.7G301600/Seita.8G013300/Seita.8G228200/Seita.9G006400/Seita.9G034700/Seita.9G136100/Seita.9G357300/Seita.9G379000/Seita.J031500	25		Ci134DEG	MF	GO:0008509	anion transmembrane transporter activity	49/775	245/8539	7.4111e-08	3.67046e-05	3.28675e-05	Seita.1G044800/Seita.1G115800/Seita.1G116100/Seita.1G218500/Seita.1G218600/Seita.1G241300/Seita.1G268000/Seita.1G278500/Seita.2G106700/Seita.2G141700/Seita.2G167400/Seita.2G335600/Seita.2G352700/Seita.2G360800/Seita.3G102000/Seita.3G223500/Seita.3G283100/Seita.3G333100/Seita.3G406500/Seita.4G005300/Seita.4G083300/Seita.4G138500/Seita.4G227300/Seita.4G231500/Seita.5G026800/Seita.5G121600/Seita.5G1…	49
Ci134DEG	CC	GO:0005887	integral component of plasma membrane	53/1037	211/9955	6.18117e-10	8.43729e-08	8.43729e-08	Seita.1G025100/Seita.1G135500/Seita.1G237300/Seita.1G259900/Seita.1G318800/Seita.1G333100/Seita.2G123200/Seita.2G123300/Seita.2G166600/Seita.2G260700/Seita.3G005500/Seita.3G076900/Seita.3G077500/Seita.3G194400/Seita.3G244500/Seita.4G006600/Seita.4G180100/Seita.4G257500/Seita.4G276500/Seita.5G007300/Seita.5G007500/Seita.5G019000/Seita.5G043400/Seita.5G096100/Seita.5G104100/Seita.5G124100/Seita.5G2…	53		Ci603DEG	BP	GO:0000470	maturation of LSU-rRNA	9/839	26/9983	0.000168711	0.0285249	0.0273959	Seita.2G267400/Seita.3G008800/Seita.4G122000/Seita.4G177300/Seita.6G017200/Seita.6G224900/Seita.7G064700/Seita.7G228400/Seita.9G128300	9		Ci134DEG	MF	GO:0015075	ion transmembrane transporter activity	80/775	495/8539	1.44222e-07	3.67046e-05	3.28675e-05	Seita.1G019500/Seita.1G020100/Seita.1G028000/Seita.1G044800/Seita.1G068700/Seita.1G115800/Seita.1G116100/Seita.1G218500/Seita.1G218600/Seita.1G241300/Seita.1G268000/Seita.1G272900/Seita.1G278500/Seita.2G106700/Seita.2G129100/Seita.2G141700/Seita.2G167400/Seita.2G335600/Seita.2G352700/Seita.2G360800/Seita.2G432200/Seita.3G102000/Seita.3G112800/Seita.3G120200/Seita.3G223500/Seita.3G283100/Seita.3G3…	80
Ci134DEG	CC	GO:0005618	cell wall	93/1037	490/9955	4.01021e-09	3.04653e-07	3.04653e-07	Seita.1G079000/Seita.1G092900/Seita.1G162700/Seita.1G162800/Seita.1G210300/Seita.1G295700/Seita.1G316700/Seita.1G318800/Seita.1G323700/Seita.1G378600/Seita.2G003000/Seita.2G027000/Seita.2G069000/Seita.2G069100/Seita.2G133900/Seita.2G134000/Seita.2G218700/Seita.2G225500/Seita.2G396200/Seita.3G067600/Seita.3G071400/Seita.3G146800/Seita.3G162000/Seita.3G177700/Seita.3G190400/Seita.3G263500/Seita.3G2…	93		Ci603DEG	BP	GO:0098656	anion transmembrane transport	40/839	265/9983	0.000188293	0.0285249	0.0273959	Seita.1G044800/Seita.1G278500/Seita.1G333100/Seita.1G360400/Seita.2G335600/Seita.2G352700/Seita.3G223500/Seita.3G283100/Seita.3G283500/Seita.3G299000/Seita.3G323900/Seita.3G406500/Seita.4G005300/Seita.4G006500/Seita.4G006600/Seita.4G083300/Seita.4G208500/Seita.4G231500/Seita.5G000800/Seita.5G365100/Seita.5G387200/Seita.6G058300/Seita.7G037100/Seita.7G046200/Seita.7G204900/Seita.7G239900/Seita.7G2…	40		Ci134DEG	MF	GO:0015318	inorganic molecular entity transmembrane transporter activity	77/775	492/8539	9.42869e-07	0.000159973	0.00014325	Seita.1G019500/Seita.1G020100/Seita.1G028000/Seita.1G068700/Seita.1G115800/Seita.1G116100/Seita.1G127900/Seita.1G218500/Seita.1G218600/Seita.1G268000/Seita.1G272900/Seita.1G278500/Seita.2G106700/Seita.2G129100/Seita.2G141700/Seita.2G167400/Seita.2G291500/Seita.2G335600/Seita.2G360800/Seita.2G432200/Seita.3G082100/Seita.3G102000/Seita.3G112800/Seita.3G120200/Seita.3G223500/Seita.3G283100/Seita.3G3…	77
Ci134DEG	CC	GO:0030312	external encapsulating structure	93/1037	491/9955	4.46378e-09	3.04653e-07	3.04653e-07	Seita.1G079000/Seita.1G092900/Seita.1G162700/Seita.1G162800/Seita.1G210300/Seita.1G295700/Seita.1G316700/Seita.1G318800/Seita.1G323700/Seita.1G378600/Seita.2G003000/Seita.2G027000/Seita.2G069000/Seita.2G069100/Seita.2G133900/Seita.2G134000/Seita.2G218700/Seita.2G225500/Seita.2G396200/Seita.3G067600/Seita.3G071400/Seita.3G146800/Seita.3G162000/Seita.3G177700/Seita.3G190400/Seita.3G263500/Seita.3G2…	93		Ci603DEG	BP	GO:0048878	chemical homeostasis	47/839	328/9983	0.000189971	0.0285249	0.0273959	Seita.1G019500/Seita.1G141800/Seita.1G230100/Seita.1G278500/Seita.1G281500/Seita.1G317400/Seita.1G333100/Seita.2G159000/Seita.2G229900/Seita.2G302100/Seita.2G309200/Seita.2G426200/Seita.3G006100/Seita.3G030500/Seita.3G049900/Seita.3G243500/Seita.3G260800/Seita.4G083300/Seita.4G101300/Seita.4G110300/Seita.4G159500/Seita.4G175000/Seita.4G183800/Seita.4G224700/Seita.4G242300/Seita.5G000800/Seita.5G1…	47		Ci134DEG	MF	GO:0008514	organic anion transmembrane transporter activity	33/775	168/8539	1.51841e-05	0.00193218	0.00173019	Seita.1G044800/Seita.1G241300/Seita.1G268000/Seita.2G106700/Seita.2G141700/Seita.2G167400/Seita.2G335600/Seita.2G352700/Seita.2G360800/Seita.3G102000/Seita.3G223500/Seita.3G406500/Seita.4G005300/Seita.4G083300/Seita.4G227300/Seita.4G231500/Seita.5G026800/Seita.5G121600/Seita.5G127600/Seita.5G145600/Seita.5G242900/Seita.5G365100/Seita.5G387200/Seita.5G469400/Seita.6G118800/Seita.7G102400/Seita.7G1…	33
Ci134DEG	CC	GO:0031012	extracellular matrix	14/1037	24/9955	1.17175e-08	6.39778e-07	6.39778e-07	Seita.1G162700/Seita.1G162800/Seita.6G037400/Seita.6G037500/Seita.6G038200/Seita.6G038300/Seita.6G038400/Seita.6G038500/Seita.6G038600/Seita.6G038700/Seita.6G038800/Seita.6G039000/Seita.6G039100/Seita.9G463100	14		Ci603DEG	BP	GO:0009414	response to water deprivation	48/839	340/9983	0.000232761	0.0324536	0.031169	Seita.1G103700/Seita.1G161800/Seita.1G267200/Seita.1G323900/Seita.1G324300/Seita.1G331600/Seita.2G035400/Seita.2G142500/Seita.2G226700/Seita.2G284000/Seita.2G352700/Seita.3G144000/Seita.3G157100/Seita.3G193800/Seita.3G260500/Seita.3G347500/Seita.3G379400/Seita.4G021600/Seita.4G060700/Seita.4G232000/Seita.4G259700/Seita.5G000800/Seita.5G046600/Seita.5G119800/Seita.5G351300/Seita.5G393800/Seita.5G4…	48		Ci134DEG	MF	GO:0005342	organic acid transmembrane transporter activity	27/775	130/8539	3.21506e-05	0.00272744	0.00244232	Seita.1G268000/Seita.2G106700/Seita.2G141700/Seita.2G167400/Seita.2G335600/Seita.2G360800/Seita.3G102000/Seita.3G223500/Seita.4G005300/Seita.4G083300/Seita.4G231500/Seita.5G026800/Seita.5G121600/Seita.5G127600/Seita.5G145600/Seita.5G242900/Seita.5G365100/Seita.5G387200/Seita.5G469400/Seita.6G118800/Seita.7G102400/Seita.7G125900/Seita.8G107500/Seita.9G306500/Seita.9G311800/Seita.9G431100/Seita.9G4…	27
Ci134DEG	CC	GO:0009505	plant-type cell wall	44/1037	220/9955	1.44506e-05	0.000657501	0.000657501	Seita.1G079000/Seita.1G092900/Seita.1G210300/Seita.1G316700/Seita.1G318800/Seita.2G027000/Seita.2G069000/Seita.2G069100/Seita.2G218700/Seita.3G071400/Seita.3G146800/Seita.3G162000/Seita.3G190400/Seita.3G270300/Seita.3G347500/Seita.4G021600/Seita.4G169700/Seita.4G255800/Seita.4G259700/Seita.4G284800/Seita.5G035500/Seita.5G153500/Seita.5G328200/Seita.5G338000/Seita.5G463200/Seita.6G153100/Seita.7G1…	44		Ci603DEG	BP	GO:0009733	response to auxin	46/839	326/9983	0.000316104	0.039029	0.0374842	Seita.1G116500/Seita.1G116600/Seita.1G141800/Seita.1G209000/Seita.1G210300/Seita.1G317400/Seita.1G324100/Seita.1G332100/Seita.1G333100/Seita.2G166600/Seita.2G219700/Seita.3G020000/Seita.3G080900/Seita.3G244500/Seita.3G379400/Seita.3G393100/Seita.4G005300/Seita.4G006500/Seita.4G006600/Seita.4G083300/Seita.4G101300/Seita.4G288100/Seita.5G079300/Seita.5G126200/Seita.5G149100/Seita.5G241500/Seita.5G3…	46		Ci134DEG	MF	GO:0046943	carboxylic acid transmembrane transporter activity	27/775	130/8539	3.21506e-05	0.00272744	0.00244232	Seita.1G268000/Seita.2G106700/Seita.2G141700/Seita.2G167400/Seita.2G335600/Seita.2G360800/Seita.3G102000/Seita.3G223500/Seita.4G005300/Seita.4G083300/Seita.4G231500/Seita.5G026800/Seita.5G121600/Seita.5G127600/Seita.5G145600/Seita.5G242900/Seita.5G365100/Seita.5G387200/Seita.5G469400/Seita.6G118800/Seita.7G102400/Seita.7G125900/Seita.8G107500/Seita.9G306500/Seita.9G311800/Seita.9G431100/Seita.9G4…	27
Ci134DEG	CC	GO:0005576	extracellular region	64/1037	384/9955	8.67628e-05	0.00338375	0.00338375	Seita.1G002800/Seita.1G116400/Seita.1G162700/Seita.1G162800/Seita.1G245800/Seita.1G295700/Seita.1G323700/Seita.1G324300/Seita.1G331300/Seita.1G332000/Seita.2G003000/Seita.2G033500/Seita.2G044900/Seita.2G168000/Seita.2G396200/Seita.2G401000/Seita.3G067600/Seita.3G097400/Seita.3G177700/Seita.3G263500/Seita.3G312900/Seita.3G315000/Seita.4G082600/Seita.4G232000/Seita.4G245500/Seita.4G267900/Seita.5G0…	64		Ci603DEG	BP	GO:0010315	auxin efflux	9/839	28/9983	0.00031991	0.039029	0.0374842	Seita.1G116500/Seita.1G317400/Seita.4G101300/Seita.5G241500/Seita.6G251100/Seita.6G253500/Seita.7G123300/Seita.7G258700/Seita.7G313600	9		Ci134DEG	MF	GO:0008028	monocarboxylic acid transmembrane transporter activity	11/775	31/8539	4.96941e-05	0.00361347	0.00323572	Seita.2G106700/Seita.2G141700/Seita.2G167400/Seita.2G335600/Seita.2G360800/Seita.3G102000/Seita.4G231500/Seita.5G121600/Seita.5G242900/Seita.6G118800/Seita.9G306500	11
Ci134DEG	CC	GO:0000325	plant-type vacuole	39/1037	214/9955	0.000342501	0.0116878	0.0116878	Seita.1G162700/Seita.1G162800/Seita.1G259900/Seita.1G271500/Seita.2G412200/Seita.3G049900/Seita.3G120900/Seita.3G147300/Seita.3G375800/Seita.4G047900/Seita.4G155100/Seita.5G007300/Seita.5G007500/Seita.5G185300/Seita.5G340800/Seita.6G005100/Seita.6G037400/Seita.6G037500/Seita.6G038200/Seita.6G038300/Seita.6G038400/Seita.6G038500/Seita.6G038600/Seita.6G038700/Seita.6G038800/Seita.6G039000/Seita.6G0…	39		Ci603DEG	BP	GO:0009415	response to water	48/839	347/9983	0.000375644	0.0431327	0.0414255	Seita.1G103700/Seita.1G161800/Seita.1G267200/Seita.1G323900/Seita.1G324300/Seita.1G331600/Seita.2G035400/Seita.2G142500/Seita.2G226700/Seita.2G284000/Seita.2G352700/Seita.3G144000/Seita.3G157100/Seita.3G193800/Seita.3G260500/Seita.3G347500/Seita.3G379400/Seita.4G021600/Seita.4G060700/Seita.4G232000/Seita.4G259700/Seita.5G000800/Seita.5G046600/Seita.5G119800/Seita.5G351300/Seita.5G393800/Seita.5G4…	48		Ci134DEG	MF	GO:0015103	inorganic anion transmembrane transporter activity	19/775	80/8539	7.16757e-05	0.00405366	0.00362989	Seita.1G115800/Seita.1G116100/Seita.1G218500/Seita.1G218600/Seita.1G278500/Seita.2G167400/Seita.3G102000/Seita.3G283100/Seita.3G406500/Seita.5G121600/Seita.5G124100/Seita.5G298500/Seita.6G118800/Seita.6G141000/Seita.7G157900/Seita.9G193500/Seita.9G235900/Seita.9G327900/Seita.9G506300	19
Ci134DEG	MF	GO:0004497	monooxygenase activity	49/986	167/8539	2.69467e-10	7.56531e-08	6.91762e-08	Seita.1G260600/Seita.1G265100/Seita.1G367300/Seita.2G003500/Seita.2G145700/Seita.2G145800/Seita.2G145900/Seita.2G201000/Seita.2G219600/Seita.2G224300/Seita.2G229900/Seita.2G283800/Seita.3G116300/Seita.3G201500/Seita.3G339800/Seita.4G036200/Seita.4G145700/Seita.4G216300/Seita.4G235500/Seita.4G235600/Seita.5G139200/Seita.5G386300/Seita.6G023100/Seita.6G100500/Seita.6G101900/Seita.6G132000/Seita.6G1…	49		Ci603DEG	CC	GO:0005618	cell wall	74/766	490/9955	9.51417e-09	1.20155e-06	1.11148e-06	Seita.1G033600/Seita.1G053900/Seita.1G099100/Seita.1G180600/Seita.1G210300/Seita.1G317400/Seita.1G323700/Seita.1G335200/Seita.2G048400/Seita.2G188200/Seita.2G193900/Seita.2G314800/Seita.2G362700/Seita.2G380300/Seita.2G396100/Seita.2G396200/Seita.2G404000/Seita.2G434300/Seita.3G032700/Seita.3G067600/Seita.3G162000/Seita.3G162800/Seita.3G177600/Seita.3G177700/Seita.3G190400/Seita.3G202900/Seita.3G2…	74		Ci134DEG	MF	GO:0030246	carbohydrate binding	19/775	80/8539	7.16757e-05	0.00405366	0.00362989	Seita.1G361200/Seita.2G422000/Seita.3G225200/Seita.3G263800/Seita.3G315000/Seita.5G069300/Seita.5G448000/Seita.5G448500/Seita.6G113100/Seita.6G114000/Seita.6G128700/Seita.9G060800/Seita.9G112400/Seita.9G145500/Seita.9G231200/Seita.9G373900/Seita.9G408000/Seita.9G479800/Seita.9G532500	19
Ci134DEG	MF	GO:0016705	oxidoreductase activity, acting on paired donors, with incorporation or reduction of molecular oxygen	48/986	162/8539	2.83877e-10	7.56531e-08	6.91762e-08	Seita.1G265100/Seita.2G145700/Seita.2G145800/Seita.2G145900/Seita.2G219600/Seita.2G224300/Seita.2G229900/Seita.2G253700/Seita.2G283800/Seita.3G116300/Seita.3G339800/Seita.4G015600/Seita.4G015700/Seita.4G145700/Seita.4G216300/Seita.4G223200/Seita.4G235500/Seita.4G235600/Seita.5G139200/Seita.5G157700/Seita.5G323400/Seita.5G386300/Seita.5G404900/Seita.6G023100/Seita.6G100500/Seita.6G101900/Seita.6G1…	48		Ci603DEG	CC	GO:0030312	external encapsulating structure	74/766	491/9955	1.0403e-08	1.20155e-06	1.11148e-06	Seita.1G033600/Seita.1G053900/Seita.1G099100/Seita.1G180600/Seita.1G210300/Seita.1G317400/Seita.1G323700/Seita.1G335200/Seita.2G048400/Seita.2G188200/Seita.2G193900/Seita.2G314800/Seita.2G362700/Seita.2G380300/Seita.2G396100/Seita.2G396200/Seita.2G404000/Seita.2G434300/Seita.3G032700/Seita.3G067600/Seita.3G162000/Seita.3G162800/Seita.3G177600/Seita.3G177700/Seita.3G190400/Seita.3G202900/Seita.3G2…	74		Ci134DEG	MF	GO:0004553	hydrolase activity, hydrolyzing O-glycosyl compounds	38/775	228/8539	0.000157383	0.00801079	0.00717335	Seita.1G323700/Seita.2G081000/Seita.2G188200/Seita.2G270400/Seita.2G396200/Seita.3G225200/Seita.3G250400/Seita.3G263800/Seita.3G270200/Seita.3G315000/Seita.4G191200/Seita.4G234100/Seita.5G056800/Seita.5G157600/Seita.5G316000/Seita.5G414600/Seita.5G448000/Seita.5G448500/Seita.6G113100/Seita.6G141700/Seita.7G150600/Seita.7G164300/Seita.7G181300/Seita.9G021900/Seita.9G060800/Seita.9G091600/Seita.9G0…	38
Ci134DEG	MF	GO:0016709	oxidoreductase activity, acting on paired donors, with incorporation or reduction of molecular oxygen, NAD(P)H as one donor, and incorporation of one atom of oxygen	32/986	102/8539	6.17428e-08	1.09696e-05	1.00305e-05	Seita.2G145700/Seita.2G145800/Seita.2G145900/Seita.2G219600/Seita.2G224300/Seita.2G229900/Seita.2G283800/Seita.3G116300/Seita.3G339800/Seita.4G145700/Seita.4G216300/Seita.4G235500/Seita.4G235600/Seita.5G139200/Seita.6G023100/Seita.6G100500/Seita.6G101900/Seita.6G132000/Seita.6G237000/Seita.7G139200/Seita.8G014200/Seita.8G068800/Seita.8G069000/Seita.8G136000/Seita.8G136400/Seita.8G166500/Seita.9G0…	32		Ci603DEG	CC	GO:0009505	plant-type cell wall	39/766	220/9955	6.3891e-07	4.91961e-05	4.55083e-05	Seita.1G053900/Seita.1G099100/Seita.1G210300/Seita.1G317400/Seita.2G314800/Seita.2G380300/Seita.2G404000/Seita.2G434300/Seita.3G162000/Seita.3G190400/Seita.3G202900/Seita.3G270300/Seita.3G294700/Seita.3G347500/Seita.4G021600/Seita.4G101300/Seita.4G169700/Seita.4G210300/Seita.4G259700/Seita.5G046600/Seita.5G053000/Seita.5G053200/Seita.5G123100/Seita.5G263600/Seita.5G409400/Seita.5G454800/Seita.7G0…	39		Ci134DEG	MF	GO:0016798	hydrolase activity, acting on glycosyl bonds	40/775	249/8539	0.000238803	0.0110501	0.00989489	Seita.1G323700/Seita.2G081000/Seita.2G133200/Seita.2G188200/Seita.2G270400/Seita.2G396200/Seita.3G225200/Seita.3G250400/Seita.3G263800/Seita.3G270200/Seita.3G315000/Seita.4G191200/Seita.4G234100/Seita.5G056800/Seita.5G064300/Seita.5G157600/Seita.5G316000/Seita.5G414600/Seita.5G448000/Seita.5G448500/Seita.6G113100/Seita.6G141700/Seita.7G150600/Seita.7G164300/Seita.7G181300/Seita.9G021900/Seita.9G0…	40
Ci134DEG	MF	GO:0048037	cofactor binding	42/986	199/8539	6.55035e-05	0.00872834	0.00798108	Seita.1G069500/Seita.1G127500/Seita.1G134200/Seita.1G221800/Seita.1G357800/Seita.1G357900/Seita.2G033500/Seita.2G104900/Seita.2G110300/Seita.2G217800/Seita.2G309200/Seita.3G036400/Seita.3G038700/Seita.3G084500/Seita.3G281700/Seita.3G346000/Seita.3G386300/Seita.4G223200/Seita.4G232000/Seita.5G071800/Seita.5G165100/Seita.5G447400/Seita.5G456100/Seita.6G087600/Seita.7G020900/Seita.7G096600/Seita.7G1…	42		Ci603DEG	CC	GO:0042788	polysomal ribosome	17/766	58/9955	9.52615e-07	5.50135e-05	5.08897e-05	Seita.2G267400/Seita.3G280800/Seita.4G177300/Seita.6G017200/Seita.6G085600/Seita.6G112100/Seita.6G224900/Seita.7G099000/Seita.7G166100/Seita.7G228400/Seita.7G290900/Seita.7G314300/Seita.8G046000/Seita.9G044700/Seita.9G131800/Seita.9G502500/Seita.9G517100	17		Ci134DEG	MF	GO:0016758	transferase activity, transferring hexosyl groups	38/775	242/8539	0.000537168	0.0206027	0.0184489	Seita.1G057100/Seita.1G294300/Seita.1G301000/Seita.1G354800/Seita.2G080900/Seita.2G209100/Seita.2G209700/Seita.2G261100/Seita.2G422000/Seita.3G077100/Seita.3G176900/Seita.3G217800/Seita.3G332200/Seita.4G043100/Seita.4G065500/Seita.4G096400/Seita.4G099300/Seita.4G120200/Seita.5G064300/Seita.5G319100/Seita.5G382400/Seita.5G384100/Seita.5G388900/Seita.5G429100/Seita.6G073100/Seita.7G079000/Seita.7G1…	38
Ci134DEG	MF	GO:0015318	inorganic molecular entity transmembrane transporter activity	83/986	492/8539	0.000188706	0.0169764	0.015523	Seita.1G019500/Seita.1G025100/Seita.1G207000/Seita.1G237300/Seita.1G259900/Seita.1G268000/Seita.1G272900/Seita.1G318800/Seita.1G333100/Seita.2G000400/Seita.2G026700/Seita.2G123200/Seita.2G123300/Seita.2G224400/Seita.2G228300/Seita.2G260700/Seita.2G278500/Seita.2G352200/Seita.2G360800/Seita.2G368900/Seita.3G006100/Seita.3G049900/Seita.3G094900/Seita.3G283000/Seita.3G357100/Seita.3G357700/Seita.4G0…	83		Ci603DEG	CC	GO:0005844	polysome	17/766	72/9955	2.34848e-05	0.001085	0.00100367	Seita.2G267400/Seita.3G280800/Seita.4G177300/Seita.6G017200/Seita.6G085600/Seita.6G112100/Seita.6G224900/Seita.7G099000/Seita.7G166100/Seita.7G228400/Seita.7G290900/Seita.7G314300/Seita.8G046000/Seita.9G044700/Seita.9G131800/Seita.9G502500/Seita.9G517100	17		Ci134DEG	MF	GO:0008236	serine-type peptidase activity	14/775	59/8539	0.000633691	0.0206027	0.0184489	Seita.2G218700/Seita.4G242700/Seita.5G157800/Seita.5G285700/Seita.5G303900/Seita.5G332300/Seita.7G206300/Seita.8G097000/Seita.9G253700/Seita.9G262900/Seita.9G349500/Seita.9G376900/Seita.9G377000/Seita.9G567800	14
Ci134DEG	MF	GO:0051213	dioxygenase activity	16/986	53/8539	0.000207263	0.0169764	0.015523	Seita.2G253700/Seita.4G015600/Seita.4G015700/Seita.5G157700/Seita.5G315600/Seita.5G315800/Seita.5G323400/Seita.5G404900/Seita.7G053300/Seita.7G171000/Seita.7G171100/Seita.7G189300/Seita.8G101900/Seita.9G004400/Seita.9G122600/Seita.J029400	16		Ci603DEG	CC	GO:0005887	integral component of plasma membrane	33/766	211/9955	6.66407e-05	0.00256567	0.00237334	Seita.1G020100/Seita.1G116500/Seita.1G116600/Seita.1G135500/Seita.1G333100/Seita.2G166600/Seita.2G220700/Seita.3G082100/Seita.3G244500/Seita.3G319200/Seita.4G005300/Seita.4G006500/Seita.4G006600/Seita.4G051900/Seita.4G083300/Seita.4G098700/Seita.4G110300/Seita.4G257500/Seita.5G043400/Seita.5G079300/Seita.5G104100/Seita.5G351800/Seita.5G403300/Seita.6G214700/Seita.6G251100/Seita.7G194000/Seita.9G2…	33		Ci134DEG	MF	GO:0016825	hydrolase activity, acting on acid phosphorus-nitrogen bonds	14/775	59/8539	0.000633691	0.0206027	0.0184489	Seita.2G218700/Seita.4G242700/Seita.5G157800/Seita.5G285700/Seita.5G303900/Seita.5G332300/Seita.7G206300/Seita.8G097000/Seita.9G253700/Seita.9G262900/Seita.9G349500/Seita.9G376900/Seita.9G377000/Seita.9G567800	14
Ci134DEG	MF	GO:0005372	water transmembrane transporter activity	12/986	34/8539	0.000254805	0.0169764	0.015523	Seita.1G025100/Seita.1G259900/Seita.1G318800/Seita.2G123200/Seita.2G123300/Seita.4G180100/Seita.5G007300/Seita.5G007500/Seita.7G189600/Seita.8G085300/Seita.9G193500/Seita.9G268100	12		Ci603DEG	CC	GO:0044391	ribosomal subunit	26/766	163/9955	0.000280444	0.00895243	0.00828136	Seita.1G214900/Seita.2G048400/Seita.2G267400/Seita.2G362700/Seita.3G162800/Seita.3G280800/Seita.4G023300/Seita.4G177300/Seita.6G017200/Seita.6G085600/Seita.6G112100/Seita.6G224900/Seita.7G064700/Seita.7G099000/Seita.7G166100/Seita.7G228400/Seita.7G234800/Seita.7G290900/Seita.7G314300/Seita.8G046000/Seita.9G044700/Seita.9G124300/Seita.9G131800/Seita.9G502500/Seita.9G517100/Seita.9G544700	26		Ci134DEG	MF	GO:0017171	serine hydrolase activity	14/775	59/8539	0.000633691	0.0206027	0.0184489	Seita.2G218700/Seita.4G242700/Seita.5G157800/Seita.5G285700/Seita.5G303900/Seita.5G332300/Seita.7G206300/Seita.8G097000/Seita.9G253700/Seita.9G262900/Seita.9G349500/Seita.9G376900/Seita.9G377000/Seita.9G567800	14
Ci134DEG	MF	GO:0015250	water channel activity	12/986	34/8539	0.000254805	0.0169764	0.015523	Seita.1G025100/Seita.1G259900/Seita.1G318800/Seita.2G123200/Seita.2G123300/Seita.4G180100/Seita.5G007300/Seita.5G007500/Seita.7G189600/Seita.8G085300/Seita.9G193500/Seita.9G268100	12		Ci603DEG	CC	GO:0022626	cytosolic ribosome	27/766	173/9955	0.000310041	0.00895243	0.00828136	Seita.1G214900/Seita.1G337500/Seita.2G048400/Seita.2G267400/Seita.2G362700/Seita.3G162800/Seita.3G280800/Seita.4G023300/Seita.4G177300/Seita.6G017200/Seita.6G085600/Seita.6G112100/Seita.6G224900/Seita.7G064700/Seita.7G099000/Seita.7G166100/Seita.7G228400/Seita.7G234800/Seita.7G290900/Seita.7G314300/Seita.8G046000/Seita.9G044700/Seita.9G125400/Seita.9G131800/Seita.9G502500/Seita.9G517100/Seita.9G5…	27		Ci134DEG	MF	GO:0046527	glucosyltransferase activity	22/775	116/8539	0.00064763	0.0206027	0.0184489	Seita.1G057100/Seita.2G080900/Seita.2G209100/Seita.3G077100/Seita.3G176900/Seita.3G332200/Seita.4G043100/Seita.4G065500/Seita.4G096400/Seita.4G120200/Seita.5G064300/Seita.5G319100/Seita.5G429100/Seita.6G073100/Seita.7G079000/Seita.7G192300/Seita.7G194300/Seita.8G153700/Seita.9G227400/Seita.9G239700/Seita.9G327500/Seita.9G410800	22
Ci134DEG	MF	GO:0004553	hydrolase activity, hydrolyzing O-glycosyl compounds	44/986	228/8539	0.000377617	0.0223633	0.0204487	Seita.1G323700/Seita.2G044900/Seita.2G081000/Seita.2G237100/Seita.2G396200/Seita.3G225200/Seita.3G263500/Seita.3G315000/Seita.4G114200/Seita.4G148700/Seita.4G169700/Seita.4G255800/Seita.4G286000/Seita.5G022400/Seita.5G258600/Seita.5G328200/Seita.5G336600/Seita.5G356800/Seita.5G448000/Seita.5G450000/Seita.5G465600/Seita.6G239900/Seita.7G101100/Seita.7G134900/Seita.7G150100/Seita.7G150600/Seita.7G1…	44		Ci603DEG	CC	GO:0031226	intrinsic component of plasma membrane	42/766	331/9955	0.000848952	0.0194248	0.0179687	Seita.1G020100/Seita.1G116500/Seita.1G116600/Seita.1G135500/Seita.1G159600/Seita.1G333100/Seita.2G044900/Seita.2G166600/Seita.2G220700/Seita.2G380300/Seita.3G082100/Seita.3G244500/Seita.3G319200/Seita.4G005300/Seita.4G006500/Seita.4G006600/Seita.4G051900/Seita.4G083300/Seita.4G084200/Seita.4G098700/Seita.4G110300/Seita.4G169700/Seita.4G257500/Seita.5G043400/Seita.5G079300/Seita.5G104100/Seita.5G2…	42		Ci134DEG	MF	GO:0030247	polysaccharide binding	14/775	60/8539	0.000758959	0.0227241	0.0203486	Seita.2G422000/Seita.3G225200/Seita.3G263800/Seita.3G315000/Seita.5G448000/Seita.5G448500/Seita.6G113100/Seita.6G128700/Seita.9G060800/Seita.9G112400/Seita.9G145500/Seita.9G373900/Seita.9G479800/Seita.9G532500	14
Ci134DEG	MF	GO:0004601	peroxidase activity	13/986	42/8539	0.000616444	0.0263728	0.0241149	Seita.1G079000/Seita.1G192100/Seita.2G406500/Seita.3G190400/Seita.3G270300/Seita.3G347500/Seita.4G259700/Seita.5G463200/Seita.7G023900/Seita.7G225300/Seita.7G277800/Seita.9G186200/Seita.9G316400	13		Ci603DEG	CC	GO:0005938	cell cortex	20/766	122/9955	0.000964842	0.0194248	0.0179687	Seita.1G116500/Seita.1G116600/Seita.1G144700/Seita.1G292500/Seita.1G333100/Seita.1G364800/Seita.2G166600/Seita.3G029800/Seita.3G160800/Seita.3G244500/Seita.4G005300/Seita.4G006500/Seita.4G006600/Seita.4G083300/Seita.5G079300/Seita.5G085300/Seita.5G351800/Seita.6G251100/Seita.7G140200/Seita.9G277500	20		Ci134DEG	MF	GO:0015171	amino acid transmembrane transporter activity	14/775	61/8539	0.000904523	0.0240506	0.0215364	Seita.1G268000/Seita.3G223500/Seita.4G005300/Seita.4G083300/Seita.5G026800/Seita.5G127600/Seita.5G365100/Seita.5G387200/Seita.5G469400/Seita.7G102400/Seita.7G125900/Seita.8G107500/Seita.9G311800/Seita.9G431100	14
Ci134DEG	MF	GO:0008810	cellulase activity	7/986	15/8539	0.000745393	0.0263728	0.0241149	Seita.3G263500/Seita.3G315000/Seita.4G114200/Seita.5G022400/Seita.5G448000/Seita.5G450000/Seita.9G416600	7		Ci603DEG	CC	GO:0099568	cytoplasmic region	21/766	131/9955	0.000981383	0.0194248	0.0179687	Seita.1G116500/Seita.1G116600/Seita.1G144700/Seita.1G292500/Seita.1G333100/Seita.1G364800/Seita.2G166600/Seita.3G029800/Seita.3G160800/Seita.3G244500/Seita.4G005300/Seita.4G006500/Seita.4G006600/Seita.4G083300/Seita.5G079300/Seita.5G085300/Seita.5G351800/Seita.6G251100/Seita.7G140200/Seita.9G277500/Seita.9G510400	21		Ci134DEG	MF	GO:0035251	UDP-glucosyltransferase activity	17/775	82/8539	0.000926659	0.0240506	0.0215364	Seita.1G057100/Seita.3G077100/Seita.3G176900/Seita.4G043100/Seita.4G096400/Seita.4G120200/Seita.5G064300/Seita.5G319100/Seita.5G429100/Seita.6G073100/Seita.7G079000/Seita.7G192300/Seita.7G194300/Seita.8G153700/Seita.9G239700/Seita.9G327500/Seita.9G410800	17
Ci134DEG	MF	GO:0016798	hydrolase activity, acting on glycosyl bonds	46/986	249/8539	0.000761531	0.0263728	0.0241149	Seita.1G323700/Seita.2G044900/Seita.2G081000/Seita.2G133200/Seita.2G237100/Seita.2G396200/Seita.3G225200/Seita.3G263500/Seita.3G315000/Seita.4G114200/Seita.4G148700/Seita.4G169700/Seita.4G255800/Seita.4G286000/Seita.5G022400/Seita.5G258600/Seita.5G328200/Seita.5G336600/Seita.5G356800/Seita.5G448000/Seita.5G450000/Seita.5G465600/Seita.6G239900/Seita.6G243800/Seita.7G101100/Seita.7G134900/Seita.7G1…	46		Ci603DEG	CC	GO:0022625	cytosolic large ribosomal subunit	15/766	80/9955	0.00100908	0.0194248	0.0179687	Seita.1G214900/Seita.2G267400/Seita.3G162800/Seita.4G177300/Seita.6G017200/Seita.6G085600/Seita.6G112100/Seita.6G224900/Seita.7G064700/Seita.7G166100/Seita.7G228400/Seita.7G290900/Seita.7G314300/Seita.8G046000/Seita.9G544700	15		Ci134DEG	MF	GO:0004252	serine-type endopeptidase activity	9/775	30/8539	0.000992013	0.0240506	0.0215364	Seita.2G218700/Seita.4G242700/Seita.5G285700/Seita.5G303900/Seita.5G332300/Seita.7G206300/Seita.9G253700/Seita.9G349500/Seita.9G567800	9
Ci134DEG	MF	GO:0008236	serine-type peptidase activity	16/986	59/8539	0.000785736	0.0263728	0.0241149	Seita.1G046800/Seita.1G116400/Seita.2G069000/Seita.2G069100/Seita.2G218700/Seita.4G242700/Seita.5G370200/Seita.7G203700/Seita.7G269800/Seita.8G097000/Seita.9G262900/Seita.9G340500/Seita.9G376900/Seita.9G377000/Seita.9G377100/Seita.9G533900	16		Ci603DEG	CC	GO:0022627	cytosolic small ribosomal subunit	10/766	47/9955	0.00259914	0.0461848	0.0427228	Seita.2G048400/Seita.2G362700/Seita.3G280800/Seita.4G023300/Seita.7G099000/Seita.7G234800/Seita.9G044700/Seita.9G131800/Seita.9G502500/Seita.9G517100	10		Ci134DEG	MF	GO:0016706	2-oxoglutarate-dependent dioxygenase activity	10/775	36/8539	0.00102235	0.0240506	0.0215364	Seita.1G332100/Seita.2G253700/Seita.3G026900/Seita.5G404900/Seita.7G135700/Seita.7G171000/Seita.7G171100/Seita.9G048800/Seita.J003500/Seita.J029400	10
Ci134DEG	MF	GO:0016825	hydrolase activity, acting on acid phosphorus-nitrogen bonds	16/986	59/8539	0.000785736	0.0263728	0.0241149	Seita.1G046800/Seita.1G116400/Seita.2G069000/Seita.2G069100/Seita.2G218700/Seita.4G242700/Seita.5G370200/Seita.7G203700/Seita.7G269800/Seita.8G097000/Seita.9G262900/Seita.9G340500/Seita.9G376900/Seita.9G377000/Seita.9G377100/Seita.9G533900	16		Ci603DEG	MF	GO:0016168	chlorophyll binding	7/723	15/8539	0.000106478	0.0206329	0.0193495	Seita.2G217800/Seita.2G351600/Seita.2G352900/Seita.3G143800/Seita.4G139900/Seita.8G080900/Seita.9G177100	7		Ci134DEG	MF	GO:0016151	nickel cation binding	5/775	10/8539	0.00103951	0.0240506	0.0215364	Seita.5G166200/Seita.5G166300/Seita.6G036000/Seita.8G115200/Seita.8G115400	5
Ci134DEG	MF	GO:0017171	serine hydrolase activity	16/986	59/8539	0.000785736	0.0263728	0.0241149	Seita.1G046800/Seita.1G116400/Seita.2G069000/Seita.2G069100/Seita.2G218700/Seita.4G242700/Seita.5G370200/Seita.7G203700/Seita.7G269800/Seita.8G097000/Seita.9G262900/Seita.9G340500/Seita.9G376900/Seita.9G377000/Seita.9G377100/Seita.9G533900	16		Ci603DEG	MF	GO:0015562	efflux transmembrane transporter activity	10/723	30/8539	0.000111678	0.0206329	0.0193495	Seita.1G317400/Seita.1G333100/Seita.4G083300/Seita.4G101300/Seita.5G241500/Seita.6G253500/Seita.7G123300/Seita.7G258700/Seita.7G313600/Seita.9G277500	10		Ci134DEG	MF	GO:0016168	chlorophyll binding	6/775	15/8539	0.00134004	0.0290395	0.0260037	Seita.2G351600/Seita.2G352900/Seita.3G143800/Seita.4G139900/Seita.8G080900/Seita.9G177100	6
Ci134DEG	MF	GO:0016684	oxidoreductase activity, acting on peroxide as acceptor	13/986	43/8539	0.000791679	0.0263728	0.0241149	Seita.1G079000/Seita.1G192100/Seita.2G406500/Seita.3G190400/Seita.3G270300/Seita.3G347500/Seita.4G259700/Seita.5G463200/Seita.7G023900/Seita.7G225300/Seita.7G277800/Seita.9G186200/Seita.9G316400	13		Ci603DEG	MF	GO:0015171	amino acid transmembrane transporter activity	15/723	61/8539	0.000125048	0.0206329	0.0193495	Seita.1G333100/Seita.3G223500/Seita.3G323900/Seita.4G005300/Seita.4G006500/Seita.4G006600/Seita.4G083300/Seita.5G365100/Seita.5G387200/Seita.7G037100/Seita.7G298300/Seita.9G277500/Seita.9G299000/Seita.9G311700/Seita.9G431100	15		Ci134DEG	MF	GO:0015297	antiporter activity	12/775	50/8539	0.00136925	0.0290395	0.0260037	Seita.1G019500/Seita.1G241300/Seita.1G278500/Seita.2G141700/Seita.2G167400/Seita.3G102000/Seita.4G138500/Seita.5G121600/Seita.5G145600/Seita.6G118800/Seita.7G102400/Seita.9G220000	12
Ci134DEG	MF	GO:0015171	amino acid transmembrane transporter activity	16/986	61/8539	0.00116331	0.0364733	0.0333507	Seita.1G268000/Seita.1G333100/Seita.2G026700/Seita.4G006600/Seita.5G026800/Seita.5G127600/Seita.5G230200/Seita.5G365100/Seita.5G387200/Seita.7G037100/Seita.7G058900/Seita.7G185900/Seita.7G298300/Seita.9G299000/Seita.9G431100/Seita.9G471700	16		Ci603DEG	MF	GO:0080161	auxin transmembrane transporter activity	9/723	28/8539	0.00033683	0.0416827	0.03909	Seita.1G317400/Seita.3G223500/Seita.4G101300/Seita.5G241500/Seita.5G387200/Seita.6G253500/Seita.7G123300/Seita.7G258700/Seita.7G313600	9		Ci134DEG	MF	GO:0015291	secondary active transmembrane transporter activity	24/775	140/8539	0.00166026	0.0332571	0.0297805	Seita.1G019500/Seita.1G028000/Seita.1G127900/Seita.1G241300/Seita.1G278500/Seita.2G141700/Seita.2G167400/Seita.2G335600/Seita.3G102000/Seita.3G357100/Seita.3G357700/Seita.3G406500/Seita.4G138500/Seita.5G121600/Seita.5G145600/Seita.6G118800/Seita.7G102400/Seita.7G120800/Seita.8G005600/Seita.9G202700/Seita.9G220000/Seita.9G235900/Seita.9G272300/Seita.9G483100	24
Ci134DEG	MF	GO:0015562	efflux transmembrane transporter activity	10/986	30/8539	0.00138033	0.0408732	0.037374	Seita.1G228300/Seita.1G333100/Seita.2G264800/Seita.5G124100/Seita.5G351400/Seita.5G429600/Seita.6G060300/Seita.7G029100/Seita.7G258700/Seita.7G313600	10		Ci603DEG	MF	GO:0015318	inorganic molecular entity transmembrane transporter activity	63/723	492/8539	0.000499315	0.0484589	0.0454447	Seita.1G019500/Seita.1G020100/Seita.1G141800/Seita.1G207000/Seita.1G272900/Seita.1G278500/Seita.1G333100/Seita.1G360400/Seita.2G224400/Seita.2G335600/Seita.2G432200/Seita.3G006100/Seita.3G049900/Seita.3G082100/Seita.3G112800/Seita.3G120200/Seita.3G208000/Seita.3G223500/Seita.3G283100/Seita.3G283500/Seita.3G299000/Seita.3G323900/Seita.3G357700/Seita.3G406500/Seita.4G005300/Seita.4G006500/Seita.4G0…	63		Ci134DEG	MF	GO:0004805	trehalose-phosphatase activity	5/775	11/8539	0.00176413	0.0332571	0.0297805	Seita.1G323700/Seita.2G188200/Seita.2G396200/Seita.6G141700/Seita.9G381600	5
Ci603DEG	BP	GO:0019748	secondary metabolic process	100/1938	305/9983	1.34296e-08	3.2513e-05	3.08881e-05	Seita.1G000700/Seita.1G019400/Seita.1G062400/Seita.1G063900/Seita.1G064000/Seita.1G064100/Seita.1G089800/Seita.1G158700/Seita.1G270800/Seita.1G271000/Seita.1G379700/Seita.2G033500/Seita.2G042900/Seita.2G104900/Seita.2G105100/Seita.2G132800/Seita.2G140600/Seita.2G145700/Seita.2G145800/Seita.2G145900/Seita.2G154400/Seita.2G178900/Seita.2G219700/Seita.2G224300/Seita.2G278500/Seita.2G283800/Seita.2G3…	100		Ci603DEG	MF	GO:0015075	ion transmembrane transporter activity	63/723	495/8539	0.000587381	0.0484589	0.0454447	Seita.1G019500/Seita.1G020100/Seita.1G044800/Seita.1G141800/Seita.1G207000/Seita.1G272900/Seita.1G278500/Seita.1G333100/Seita.1G360400/Seita.2G224400/Seita.2G335600/Seita.2G352700/Seita.2G432200/Seita.3G006100/Seita.3G049900/Seita.3G112800/Seita.3G120200/Seita.3G208000/Seita.3G223500/Seita.3G283100/Seita.3G283500/Seita.3G299000/Seita.3G323900/Seita.3G357700/Seita.3G406500/Seita.4G005300/Seita.4G0…	63		Ci134DEG	MF	GO:0015114	phosphate ion transmembrane transporter activity	5/775	11/8539	0.00176413	0.0332571	0.0297805	Seita.2G167400/Seita.3G102000/Seita.5G121600/Seita.6G118800/Seita.7G157900	5
Ci603DEG	BP	GO:0032787	monocarboxylic acid metabolic process	124/1938	412/9983	7.37256e-08	8.92449e-05	8.47845e-05	Seita.1G047500/Seita.1G063600/Seita.1G069500/Seita.1G103700/Seita.1G121100/Seita.1G121600/Seita.1G122400/Seita.1G177400/Seita.1G223900/Seita.1G265100/Seita.1G340800/Seita.1G354800/Seita.1G371900/Seita.1G379700/Seita.2G042900/Seita.2G104900/Seita.2G105100/Seita.2G187800/Seita.2G187900/Seita.2G190100/Seita.2G290900/Seita.2G300900/Seita.2G360500/Seita.3G015800/Seita.3G051400/Seita.3G056400/Seita.3G0…	124		Ci328DEG	BP	GO:0009636	response to toxic substance	31/543	252/9983	1.62989e-05	0.0289631	0.0280856	Seita.1G012200/Seita.1G079000/Seita.1G192100/Seita.1G209000/Seita.2G406500/Seita.3G089400/Seita.3G099600/Seita.3G175700/Seita.3G192300/Seita.3G270300/Seita.3G347500/Seita.5G046600/Seita.5G092400/Seita.5G207000/Seita.5G263000/Seita.5G333100/Seita.5G346500/Seita.5G421200/Seita.7G093900/Seita.7G101100/Seita.7G102200/Seita.7G124900/Seita.7G167900/Seita.8G153700/Seita.8G222300/Seita.9G077800/Seita.9G2…	31		Ci134DEG	MF	GO:0048037	cofactor binding	31/775	199/8539	0.00192738	0.0350371	0.0313743	Seita.1G069500/Seita.1G127500/Seita.1G357900/Seita.2G351600/Seita.2G352900/Seita.2G430500/Seita.3G143800/Seita.3G206500/Seita.3G281700/Seita.3G330000/Seita.4G139900/Seita.4G191600/Seita.5G071800/Seita.5G246700/Seita.5G280800/Seita.5G342100/Seita.5G384100/Seita.5G467000/Seita.6G005700/Seita.7G028400/Seita.7G119400/Seita.8G080900/Seita.9G061200/Seita.9G177100/Seita.9G186600/Seita.9G191500/Seita.9G3…	31
Ci603DEG	BP	GO:0055088	lipid homeostasis	27/1938	53/9983	2.50857e-07	0.000202442	0.000192324	Seita.1G063600/Seita.1G166600/Seita.2G229900/Seita.2G277900/Seita.2G413200/Seita.3G114000/Seita.3G116300/Seita.3G201500/Seita.3G243500/Seita.3G243700/Seita.3G243800/Seita.4G194200/Seita.4G224700/Seita.5G139200/Seita.5G232500/Seita.6G089500/Seita.7G199400/Seita.7G204200/Seita.7G318000/Seita.8G041200/Seita.8G166500/Seita.9G021400/Seita.9G173500/Seita.9G205600/Seita.9G205700/Seita.9G205800/Seita.9G4…	27		Ci328DEG	CC	GO:0005887	integral component of plasma membrane	28/501	211/9955	2.30465e-06	0.000497804	0.000473059	Seita.1G116600/Seita.1G259900/Seita.2G115800/Seita.2G115900/Seita.2G166600/Seita.2G291500/Seita.3G068600/Seita.3G082100/Seita.3G319400/Seita.3G333100/Seita.4G005300/Seita.4G006500/Seita.4G083300/Seita.5G007500/Seita.5G096100/Seita.5G104100/Seita.5G284900/Seita.5G333000/Seita.5G403300/Seita.6G251100/Seita.7G170200/Seita.7G228200/Seita.8G130300/Seita.8G222300/Seita.9G235900/Seita.9G277500/Seita.9G4…	28		Ci134DEG	MF	GO:0051213	dioxygenase activity	12/775	53/8539	0.00233722	0.0410222	0.0367338	Seita.1G332100/Seita.2G035400/Seita.2G253700/Seita.3G026900/Seita.5G404900/Seita.7G135700/Seita.7G171000/Seita.7G171100/Seita.9G048800/Seita.9G267000/Seita.J003500/Seita.J029400	12
Ci603DEG	BP	GO:0048878	chemical homeostasis	101/1938	328/9983	3.74677e-07	0.000226773	0.000215439	Seita.1G019500/Seita.1G063600/Seita.1G071600/Seita.1G130300/Seita.1G141800/Seita.1G155500/Seita.1G166600/Seita.1G169800/Seita.1G179000/Seita.1G206500/Seita.1G231200/Seita.1G256100/Seita.1G263000/Seita.1G274100/Seita.1G319500/Seita.1G333100/Seita.2G090300/Seita.2G090500/Seita.2G197500/Seita.2G229900/Seita.2G277900/Seita.2G302500/Seita.2G309200/Seita.2G397300/Seita.2G413200/Seita.3G030500/Seita.3G0…	101		Ci328DEG	CC	GO:0031226	intrinsic component of plasma membrane	34/501	331/9955	5.65437e-05	0.00610672	0.00580317	Seita.1G116600/Seita.1G259900/Seita.2G044900/Seita.2G115800/Seita.2G115900/Seita.2G166600/Seita.2G291500/Seita.2G380300/Seita.3G068600/Seita.3G082100/Seita.3G263800/Seita.3G319400/Seita.3G333100/Seita.4G005300/Seita.4G006500/Seita.4G083300/Seita.5G007500/Seita.5G096100/Seita.5G104100/Seita.5G263600/Seita.5G284900/Seita.5G333000/Seita.5G403300/Seita.6G251100/Seita.7G170200/Seita.7G228200/Seita.8G1…	34		Ci134DEG	MF	GO:0019203	carbohydrate phosphatase activity	7/775	22/8539	0.00249568	0.0423433	0.0379168	Seita.1G323700/Seita.2G188200/Seita.2G396200/Seita.6G128700/Seita.6G141700/Seita.9G381600/Seita.9G458800	7
Ci603DEG	BP	GO:0042446	hormone biosynthetic process	67/1938	200/9983	1.42825e-06	0.000631167	0.000599622	Seita.1G021400/Seita.1G034400/Seita.1G275400/Seita.1G317500/Seita.1G345400/Seita.1G347600/Seita.1G371900/Seita.2G000900/Seita.2G042900/Seita.2G104900/Seita.2G105100/Seita.2G144900/Seita.2G225400/Seita.2G225500/Seita.2G229900/Seita.2G390100/Seita.2G436000/Seita.3G114000/Seita.3G116300/Seita.4G051800/Seita.4G065000/Seita.4G078000/Seita.4G078100/Seita.4G078200/Seita.4G101100/Seita.4G110900/Seita.4G2…	67		Ci328DEG	CC	GO:0000347	THO complex	5/501	13/9955	0.000290744	0.0209335	0.019893	Seita.1G352100/Seita.3G205800/Seita.3G335500/Seita.5G192100/Seita.8G121500	5		Ci134DEG	MF	GO:0016757	transferase activity, transferring glycosyl groups	40/775	283/8539	0.00301571	0.049516	0.0443396	Seita.1G057100/Seita.1G294300/Seita.1G301000/Seita.1G354800/Seita.2G080900/Seita.2G209100/Seita.2G209700/Seita.2G261100/Seita.2G422000/Seita.2G443600/Seita.3G077100/Seita.3G176900/Seita.3G217800/Seita.3G332200/Seita.4G043100/Seita.4G065500/Seita.4G096400/Seita.4G099300/Seita.4G120200/Seita.5G064300/Seita.5G319100/Seita.5G382400/Seita.5G384100/Seita.5G388900/Seita.5G429100/Seita.6G073100/Seita.7G0…	40
Ci603DEG	BP	GO:0042445	hormone metabolic process	89/1938	288/9983	1.56423e-06	0.000631167	0.000599622	Seita.1G021400/Seita.1G034400/Seita.1G116500/Seita.1G166600/Seita.1G275400/Seita.1G317500/Seita.1G345400/Seita.1G347600/Seita.1G371900/Seita.2G000900/Seita.2G042900/Seita.2G098500/Seita.2G104900/Seita.2G105100/Seita.2G144900/Seita.2G225400/Seita.2G225500/Seita.2G229900/Seita.2G390100/Seita.2G413200/Seita.2G436000/Seita.3G114000/Seita.3G116300/Seita.3G147000/Seita.3G150700/Seita.3G170100/Seita.3G2…	89		Ci328DEG	CC	GO:0010369	chromocenter	5/501	15/9955	0.000623759	0.033683	0.0320087	Seita.3G227400/Seita.4G066000/Seita.4G066200/Seita.7G095500/Seita.7G144300	5		Ci603DEG	BP	GO:0019684	photosynthesis, light reaction	35/1273	91/9983	4.43387e-10	9.98507e-07	9.63317e-07	Seita.1G013300/Seita.1G118300/Seita.1G321900/Seita.2G046600/Seita.2G202200/Seita.2G330500/Seita.2G351600/Seita.2G352900/Seita.3G126900/Seita.3G143800/Seita.3G158600/Seita.3G203200/Seita.3G249600/Seita.3G333700/Seita.4G099200/Seita.4G139900/Seita.4G219400/Seita.4G248300/Seita.5G195800/Seita.5G336700/Seita.5G348400/Seita.6G005700/Seita.6G082000/Seita.6G094800/Seita.6G103300/Seita.6G163000/Seita.7G0…	35
Ci603DEG	BP	GO:0009636	response to toxic substance	78/1938	252/9983	6.4209e-06	0.00222071	0.00210972	Seita.1G002000/Seita.1G012200/Seita.1G045200/Seita.1G089800/Seita.1G117500/Seita.1G192100/Seita.1G206500/Seita.1G239600/Seita.1G295400/Seita.1G336800/Seita.2G001400/Seita.2G033500/Seita.2G090300/Seita.2G090500/Seita.2G178900/Seita.2G324100/Seita.2G406500/Seita.3G038700/Seita.3G096900/Seita.3G097200/Seita.3G175700/Seita.3G190400/Seita.3G192300/Seita.3G203100/Seita.3G286500/Seita.4G040000/Seita.4G0…	78		Ci409DEG	BP	GO:0071554	cell wall organization or biogenesis	30/232	409/9983	1.98866e-08	2.31679e-05	2.22102e-05	Seita.1G116500/Seita.1G325200/Seita.2G044900/Seita.2G200200/Seita.2G382900/Seita.3G158500/Seita.3G337900/Seita.3G350800/Seita.3G371900/Seita.4G259700/Seita.5G053000/Seita.5G153500/Seita.5G242700/Seita.5G246600/Seita.5G463200/Seita.6G086100/Seita.6G105300/Seita.7G239900/Seita.7G257800/Seita.7G264000/Seita.8G081100/Seita.8G081300/Seita.9G233400/Seita.9G326300/Seita.9G327100/Seita.9G363400/Seita.9G4…	30		Ci603DEG	BP	GO:0015979	photosynthesis	40/1273	128/9983	2.92802e-08	3.29696e-05	3.18076e-05	Seita.1G013300/Seita.1G118300/Seita.1G321900/Seita.2G046600/Seita.2G202200/Seita.2G330500/Seita.2G335600/Seita.2G351600/Seita.2G352900/Seita.2G387600/Seita.2G389600/Seita.3G126900/Seita.3G143800/Seita.3G158600/Seita.3G203200/Seita.3G249600/Seita.3G333700/Seita.3G390600/Seita.4G099200/Seita.4G139900/Seita.4G219400/Seita.4G248300/Seita.5G195800/Seita.5G240000/Seita.5G336700/Seita.5G348400/Seita.6G0…	40
Ci603DEG	BP	GO:0080167	response to karrikin	48/1938	136/9983	9.00422e-06	0.0027249	0.00258871	Seita.1G114900/Seita.1G115700/Seita.1G115800/Seita.1G116000/Seita.1G116100/Seita.1G346600/Seita.2G033500/Seita.2G081000/Seita.2G178900/Seita.2G334500/Seita.2G394500/Seita.3G108800/Seita.3G155100/Seita.3G170100/Seita.3G270000/Seita.3G393100/Seita.3G406500/Seita.4G121900/Seita.4G232000/Seita.4G276400/Seita.4G277900/Seita.5G274700/Seita.5G356600/Seita.5G356800/Seita.5G399300/Seita.5G446300/Seita.5G4…	48		Ci409DEG	BP	GO:0009644	response to high light intensity	10/232	80/9983	1.49934e-05	0.00598342	0.00573608	Seita.1G012200/Seita.1G045200/Seita.2G053800/Seita.3G175700/Seita.4G099200/Seita.5G014300/Seita.5G092400/Seita.9G272800/Seita.9G457400/Seita.9G488400	10		Ci603DEG	BP	GO:0006091	generation of precursor metabolites and energy	58/1273	240/9983	7.27845e-07	0.000465312	0.000448913	Seita.1G013300/Seita.1G118300/Seita.1G321900/Seita.2G046600/Seita.2G202200/Seita.2G288000/Seita.2G330500/Seita.2G351600/Seita.2G352900/Seita.2G422000/Seita.3G111200/Seita.3G126900/Seita.3G143800/Seita.3G158600/Seita.3G203200/Seita.3G249600/Seita.3G333700/Seita.4G099200/Seita.4G139900/Seita.4G219400/Seita.4G248300/Seita.5G074200/Seita.5G195800/Seita.5G295200/Seita.5G313600/Seita.5G336700/Seita.5G3…	58
Ci603DEG	BP	GO:0010817	regulation of hormone levels	110/1938	390/9983	1.18882e-05	0.00319794	0.00303811	Seita.1G021400/Seita.1G034400/Seita.1G063600/Seita.1G116500/Seita.1G166600/Seita.1G240800/Seita.1G275400/Seita.1G317500/Seita.1G345400/Seita.1G347600/Seita.1G371900/Seita.2G000900/Seita.2G042900/Seita.2G098500/Seita.2G104900/Seita.2G105100/Seita.2G144900/Seita.2G207600/Seita.2G225400/Seita.2G225500/Seita.2G229900/Seita.2G302500/Seita.2G390100/Seita.2G413200/Seita.2G436000/Seita.3G114000/Seita.3G1…	110		Ci409DEG	BP	GO:0009408	response to heat	16/232	199/9983	1.54079e-05	0.00598342	0.00573608	Seita.1G012200/Seita.1G045200/Seita.1G326600/Seita.1G342400/Seita.2G053800/Seita.2G241600/Seita.2G287200/Seita.3G175700/Seita.4G111400/Seita.4G267900/Seita.5G092400/Seita.5G092900/Seita.5G093000/Seita.7G060200/Seita.9G363400/Seita.9G488400	16		Ci603DEG	BP	GO:0009765	photosynthesis, light harvesting	12/1273	20/9983	8.26487e-07	0.000465312	0.000448913	Seita.1G118300/Seita.2G046600/Seita.2G351600/Seita.2G352900/Seita.3G143800/Seita.3G249600/Seita.4G099200/Seita.4G139900/Seita.4G219400/Seita.7G257400/Seita.8G080900/Seita.9G177100	12
Ci603DEG	BP	GO:0010268	brassinosteroid homeostasis	15/1938	26/9983	1.74455e-05	0.00422356	0.00401247	Seita.1G166600/Seita.2G229900/Seita.2G413200/Seita.3G114000/Seita.3G116300/Seita.3G201500/Seita.4G224700/Seita.5G139200/Seita.6G089500/Seita.7G204200/Seita.7G318000/Seita.8G166500/Seita.9G021400/Seita.9G173500/Seita.9G480100	15		Ci409DEG	BP	GO:0071669	plant-type cell wall organization or biogenesis	18/232	257/9983	2.96865e-05	0.0086462	0.00828879	Seita.1G116500/Seita.1G325200/Seita.2G044900/Seita.2G200200/Seita.2G382900/Seita.3G158500/Seita.3G337900/Seita.3G350800/Seita.4G259700/Seita.5G242700/Seita.5G463200/Seita.6G086100/Seita.6G105300/Seita.7G264000/Seita.9G326300/Seita.9G327100/Seita.9G441000/Seita.9G494200	18		Ci603DEG	BP	GO:0042440	pigment metabolic process	45/1273	172/9983	1.29774e-06	0.000584502	0.000563902	Seita.1G043800/Seita.1G057100/Seita.1G225800/Seita.1G231800/Seita.1G332100/Seita.2G053800/Seita.2G202100/Seita.2G252100/Seita.2G285600/Seita.2G303000/Seita.2G436400/Seita.3G055700/Seita.3G242400/Seita.3G245500/Seita.3G270200/Seita.4G016600/Seita.4G022100/Seita.4G096400/Seita.4G097900/Seita.4G156200/Seita.4G224000/Seita.4G234800/Seita.4G271200/Seita.4G288600/Seita.5G034000/Seita.5G040100/Seita.5G0…	45
Ci603DEG	BP	GO:0009415	response to water	99/1938	347/9983	1.94684e-05	0.00428482	0.00407067	Seita.1G103700/Seita.1G127700/Seita.1G161800/Seita.1G177700/Seita.1G185100/Seita.1G267200/Seita.1G270500/Seita.1G271000/Seita.1G323900/Seita.1G324300/Seita.1G327600/Seita.2G033500/Seita.2G049100/Seita.2G141900/Seita.2G178900/Seita.2G229500/Seita.2G352700/Seita.2G406500/Seita.2G436000/Seita.3G007200/Seita.3G036300/Seita.3G162400/Seita.3G193800/Seita.3G337900/Seita.4G021600/Seita.4G041500/Seita.4G0…	99		Ci409DEG	BP	GO:0071555	cell wall organization	14/232	177/9983	6.32927e-05	0.0147472	0.0141376	Seita.1G325200/Seita.2G044900/Seita.3G371900/Seita.4G259700/Seita.5G153500/Seita.5G463200/Seita.6G105300/Seita.7G239900/Seita.9G233400/Seita.9G326300/Seita.9G327100/Seita.9G363400/Seita.9G441000/Seita.9G494200	14		Ci603DEG	BP	GO:0009636	response to toxic substance	57/1273	252/9983	8.22765e-06	0.00308811	0.00297927	Seita.1G002000/Seita.1G012200/Seita.1G117500/Seita.1G184000/Seita.1G192100/Seita.1G203000/Seita.1G206500/Seita.1G209000/Seita.1G239600/Seita.1G245800/Seita.1G245900/Seita.1G358900/Seita.2G090300/Seita.2G312300/Seita.2G352900/Seita.2G444000/Seita.3G016700/Seita.3G049100/Seita.3G097200/Seita.3G175700/Seita.4G011900/Seita.4G067200/Seita.5G046600/Seita.5G157600/Seita.5G171000/Seita.5G174100/Seita.5G2…	57
Ci603DEG	BP	GO:0009414	response to water deprivation	97/1938	340/9983	2.36121e-05	0.00476374	0.00452565	Seita.1G103700/Seita.1G127700/Seita.1G161800/Seita.1G177700/Seita.1G185100/Seita.1G267200/Seita.1G270500/Seita.1G271000/Seita.1G323900/Seita.1G324300/Seita.1G327600/Seita.2G033500/Seita.2G049100/Seita.2G141900/Seita.2G178900/Seita.2G229500/Seita.2G352700/Seita.2G406500/Seita.3G007200/Seita.3G036300/Seita.3G162400/Seita.3G193800/Seita.3G337900/Seita.4G021600/Seita.4G041500/Seita.4G082000/Seita.4G1…	97		Ci409DEG	BP	GO:0045229	external encapsulating structure organization	15/232	209/9983	0.00010535	0.0204554	0.0196098	Seita.1G325200/Seita.2G044900/Seita.3G371900/Seita.4G259700/Seita.5G153500/Seita.5G463200/Seita.6G105300/Seita.7G234500/Seita.7G239900/Seita.9G233400/Seita.9G326300/Seita.9G327100/Seita.9G363400/Seita.9G441000/Seita.9G494200	15		Ci603DEG	BP	GO:0046148	pigment biosynthetic process	34/1273	126/9983	1.23334e-05	0.00396782	0.00382798	Seita.1G057100/Seita.1G225800/Seita.1G231800/Seita.1G332100/Seita.2G053800/Seita.2G202100/Seita.2G252100/Seita.2G303000/Seita.3G242400/Seita.3G245500/Seita.4G016600/Seita.4G022100/Seita.4G096400/Seita.4G097900/Seita.4G156200/Seita.4G234800/Seita.4G271200/Seita.4G288600/Seita.5G040100/Seita.5G087500/Seita.5G365700/Seita.5G461800/Seita.6G094800/Seita.6G159400/Seita.7G116400/Seita.7G116800/Seita.7G1…	34
Ci603DEG	BP	GO:0006833	water transport	21/1938	45/9983	3.05585e-05	0.00528444	0.00502032	Seita.1G259900/Seita.1G318800/Seita.2G123000/Seita.2G123200/Seita.2G123300/Seita.3G073300/Seita.3G082100/Seita.3G101400/Seita.4G021600/Seita.4G098700/Seita.4G180100/Seita.5G007400/Seita.5G469800/Seita.7G170200/Seita.7G189600/Seita.8G085300/Seita.9G063400/Seita.9G193500/Seita.9G268100/Seita.9G344800/Seita.9G541300	21		Ci409DEG	BP	GO:0044036	cell wall macromolecule metabolic process	11/232	125/9983	0.00015223	0.0226957	0.0217575	Seita.1G325200/Seita.3G158500/Seita.5G053000/Seita.7G257800/Seita.7G264000/Seita.8G081100/Seita.8G081300/Seita.9G440600/Seita.9G441000/Seita.9G494200/Seita.9G573900	11		Ci603DEG	BP	GO:0080167	response to karrikin	35/1273	136/9983	2.80115e-05	0.00788523	0.00760732	Seita.1G043800/Seita.1G057100/Seita.1G225000/Seita.1G332100/Seita.2G053800/Seita.2G081000/Seita.2G335600/Seita.3G049100/Seita.3G170100/Seita.3G270200/Seita.3G406500/Seita.4G046700/Seita.4G096400/Seita.4G199800/Seita.4G224000/Seita.5G056800/Seita.5G236200/Seita.5G386100/Seita.5G465600/Seita.6G007700/Seita.6G118900/Seita.6G193700/Seita.7G028400/Seita.7G046700/Seita.7G090200/Seita.7G149800/Seita.7G1…	35
Ci603DEG	BP	GO:0042044	fluid transport	21/1938	45/9983	3.05585e-05	0.00528444	0.00502032	Seita.1G259900/Seita.1G318800/Seita.2G123000/Seita.2G123200/Seita.2G123300/Seita.3G073300/Seita.3G082100/Seita.3G101400/Seita.4G021600/Seita.4G098700/Seita.4G180100/Seita.5G007400/Seita.5G469800/Seita.7G170200/Seita.7G189600/Seita.8G085300/Seita.9G063400/Seita.9G193500/Seita.9G268100/Seita.9G344800/Seita.9G541300	21		Ci409DEG	BP	GO:0045491	xylan metabolic process	7/232	51/9983	0.000162035	0.0226957	0.0217575	Seita.3G158500/Seita.7G257800/Seita.7G264000/Seita.8G081100/Seita.8G081300/Seita.9G440600/Seita.9G441000	7		Ci603DEG	BP	GO:0016311	dephosphorylation	48/1273	222/9983	0.000136493	0.0341536	0.0329499	Seita.1G013900/Seita.1G130300/Seita.1G262000/Seita.1G288600/Seita.1G288700/Seita.1G323700/Seita.1G335000/Seita.2G143400/Seita.2G188200/Seita.2G192600/Seita.2G286900/Seita.3G139000/Seita.3G164700/Seita.3G166700/Seita.3G176900/Seita.3G249600/Seita.3G304100/Seita.3G405000/Seita.4G072200/Seita.4G245500/Seita.5G067300/Seita.5G114700/Seita.5G195800/Seita.5G236200/Seita.5G257700/Seita.5G296200/Seita.5G3…	48
Ci603DEG	BP	GO:0044550	secondary metabolite biosynthetic process	67/1938	218/9983	3.63497e-05	0.00556052	0.00528261	Seita.1G000700/Seita.1G019400/Seita.1G062400/Seita.1G063900/Seita.1G064000/Seita.1G064100/Seita.1G089800/Seita.2G132800/Seita.2G140600/Seita.2G145700/Seita.2G145800/Seita.2G145900/Seita.2G219700/Seita.2G224300/Seita.2G278500/Seita.2G283800/Seita.3G142500/Seita.3G218600/Seita.3G298400/Seita.3G339800/Seita.3G394400/Seita.4G021600/Seita.4G181500/Seita.4G216300/Seita.4G235500/Seita.5G035900/Seita.5G0…	67		Ci409DEG	BP	GO:0009642	response to light intensity	11/232	127/9983	0.000175331	0.0226957	0.0217575	Seita.1G012200/Seita.1G045200/Seita.2G053800/Seita.3G175700/Seita.4G099200/Seita.5G014300/Seita.5G092400/Seita.9G272800/Seita.9G440900/Seita.9G457400/Seita.9G488400	11		Ci603DEG	CC	GO:0031976	plastid thylakoid	97/1272	297/9955	1.18946e-19	2.0783e-17	1.93701e-17	Seita.1G013300/Seita.1G118300/Seita.1G192100/Seita.1G251800/Seita.1G303800/Seita.1G321900/Seita.2G029500/Seita.2G035400/Seita.2G046600/Seita.2G053800/Seita.2G066600/Seita.2G153300/Seita.2G163700/Seita.2G202200/Seita.2G236000/Seita.2G252100/Seita.2G263700/Seita.2G283000/Seita.2G285600/Seita.2G299200/Seita.2G310100/Seita.2G330500/Seita.2G343000/Seita.2G351600/Seita.2G352900/Seita.2G355000/Seita.2G3…	97
Ci603DEG	BP	GO:0050801	ion homeostasis	66/1938	214/9983	3.67486e-05	0.00556052	0.00528261	Seita.1G019500/Seita.1G071600/Seita.1G130300/Seita.1G141800/Seita.1G169800/Seita.1G206500/Seita.1G231200/Seita.1G256100/Seita.1G263000/Seita.1G274100/Seita.1G333100/Seita.2G090300/Seita.2G090500/Seita.2G197500/Seita.2G277900/Seita.2G309200/Seita.2G397300/Seita.3G030500/Seita.3G049900/Seita.3G051000/Seita.3G101400/Seita.3G166700/Seita.3G193100/Seita.3G243500/Seita.3G243700/Seita.3G243800/Seita.3G2…	66		Ci409DEG	BP	GO:0010383	cell wall polysaccharide metabolic process	10/232	112/9983	0.000269542	0.030307	0.0290542	Seita.1G325200/Seita.3G158500/Seita.5G053000/Seita.7G257800/Seita.7G264000/Seita.8G081100/Seita.8G081300/Seita.9G440600/Seita.9G441000/Seita.9G494200	10		Ci603DEG	CC	GO:0009534	chloroplast thylakoid	96/1272	293/9955	1.44326e-19	2.0783e-17	1.93701e-17	Seita.1G013300/Seita.1G118300/Seita.1G192100/Seita.1G251800/Seita.1G303800/Seita.1G321900/Seita.2G029500/Seita.2G035400/Seita.2G046600/Seita.2G053800/Seita.2G066600/Seita.2G153300/Seita.2G163700/Seita.2G202200/Seita.2G236000/Seita.2G252100/Seita.2G263700/Seita.2G283000/Seita.2G299200/Seita.2G310100/Seita.2G330500/Seita.2G343000/Seita.2G351600/Seita.2G352900/Seita.2G355000/Seita.2G394800/Seita.3G1…	96
Ci603DEG	BP	GO:0006720	isoprenoid metabolic process	60/1938	191/9983	4.52823e-05	0.00644382	0.00612177	Seita.1G021400/Seita.1G034400/Seita.1G047500/Seita.1G055200/Seita.1G181900/Seita.1G223900/Seita.1G272600/Seita.1G317500/Seita.1G367300/Seita.1G379700/Seita.2G000900/Seita.2G042900/Seita.2G104900/Seita.2G105100/Seita.2G144900/Seita.2G145800/Seita.2G145900/Seita.2G187800/Seita.2G187900/Seita.2G300900/Seita.2G303000/Seita.2G368100/Seita.2G390100/Seita.3G015800/Seita.3G201400/Seita.3G245500/Seita.3G4…	60		Ci409DEG	BP	GO:0042546	cell wall biogenesis	13/232	180/9983	0.000286161	0.030307	0.0290542	Seita.1G116500/Seita.1G325200/Seita.2G200200/Seita.2G382900/Seita.3G158500/Seita.3G337900/Seita.3G350800/Seita.5G242700/Seita.6G086100/Seita.7G264000/Seita.9G440600/Seita.9G441000/Seita.9G494200	13		Ci603DEG	CC	GO:0009579	thylakoid	109/1272	359/9955	3.11227e-19	2.98778e-17	2.78466e-17	Seita.1G013300/Seita.1G053900/Seita.1G118300/Seita.1G125900/Seita.1G192100/Seita.1G251800/Seita.1G303800/Seita.1G321900/Seita.1G324300/Seita.2G029500/Seita.2G035400/Seita.2G046600/Seita.2G053800/Seita.2G066600/Seita.2G153300/Seita.2G163700/Seita.2G202200/Seita.2G236000/Seita.2G252100/Seita.2G263700/Seita.2G283000/Seita.2G285600/Seita.2G288000/Seita.2G299200/Seita.2G310100/Seita.2G330500/Seita.2G3…	109
Ci603DEG	BP	GO:0015893	drug transport	41/1938	117/9983	4.79095e-05	0.00644382	0.00612177	Seita.1G003300/Seita.1G041300/Seita.1G044800/Seita.1G270500/Seita.2G001400/Seita.2G278500/Seita.2G324100/Seita.2G360800/Seita.3G357100/Seita.3G357700/Seita.4G006500/Seita.4G181500/Seita.5G015100/Seita.5G048000/Seita.5G051800/Seita.5G124100/Seita.5G243600/Seita.5G274000/Seita.5G274100/Seita.5G302300/Seita.5G333300/Seita.6G098800/Seita.6G186100/Seita.6G186200/Seita.6G252800/Seita.7G039700/Seita.7G0…	41		Ci409DEG	CC	GO:0005618	cell wall	34/211	490/9955	7.16457e-10	5.21587e-08	4.53554e-08	Seita.1G099100/Seita.1G180600/Seita.1G210300/Seita.1G295700/Seita.1G335200/Seita.1G340400/Seita.2G154700/Seita.2G396200/Seita.3G067600/Seita.3G177600/Seita.3G263800/Seita.4G234100/Seita.4G259700/Seita.5G053000/Seita.5G153500/Seita.5G263600/Seita.5G448400/Seita.5G454800/Seita.5G463200/Seita.5G467700/Seita.6G105300/Seita.7G079300/Seita.7G257800/Seita.8G081300/Seita.8G230000/Seita.9G148700/Seita.9G2…	34		Ci603DEG	CC	GO:0034357	photosynthetic membrane	79/1272	244/9955	5.89612e-16	3.39616e-14	3.16528e-14	Seita.1G013300/Seita.1G118300/Seita.1G192100/Seita.1G251800/Seita.1G303800/Seita.1G321900/Seita.2G029500/Seita.2G035400/Seita.2G046600/Seita.2G053800/Seita.2G066600/Seita.2G153300/Seita.2G163700/Seita.2G202200/Seita.2G236000/Seita.2G263700/Seita.2G283000/Seita.2G285600/Seita.2G299200/Seita.2G310100/Seita.2G330500/Seita.2G343000/Seita.2G351600/Seita.2G352900/Seita.2G355000/Seita.3G143800/Seita.3G1…	79
Ci603DEG	BP	GO:0055082	cellular chemical homeostasis	48/1938	145/9983	6.0385e-05	0.00769433	0.00730977	Seita.1G130300/Seita.1G141800/Seita.1G169800/Seita.1G179000/Seita.1G231200/Seita.1G274100/Seita.2G197500/Seita.2G397300/Seita.3G030500/Seita.3G049900/Seita.3G051000/Seita.3G166700/Seita.3G260800/Seita.4G138500/Seita.4G159500/Seita.4G175000/Seita.4G235900/Seita.4G259400/Seita.5G000800/Seita.5G103100/Seita.5G124100/Seita.5G134800/Seita.5G232500/Seita.5G270400/Seita.5G311400/Seita.5G313600/Seita.5G3…	48		Ci409DEG	CC	GO:0030312	external encapsulating structure	34/211	491/9955	7.55923e-10	5.21587e-08	4.53554e-08	Seita.1G099100/Seita.1G180600/Seita.1G210300/Seita.1G295700/Seita.1G335200/Seita.1G340400/Seita.2G154700/Seita.2G396200/Seita.3G067600/Seita.3G177600/Seita.3G263800/Seita.4G234100/Seita.4G259700/Seita.5G053000/Seita.5G153500/Seita.5G263600/Seita.5G448400/Seita.5G454800/Seita.5G463200/Seita.5G467700/Seita.6G105300/Seita.7G079300/Seita.7G257800/Seita.8G081300/Seita.8G230000/Seita.9G148700/Seita.9G2…	34		Ci603DEG	CC	GO:0042651	thylakoid membrane	79/1272	244/9955	5.89612e-16	3.39616e-14	3.16528e-14	Seita.1G013300/Seita.1G118300/Seita.1G192100/Seita.1G251800/Seita.1G303800/Seita.1G321900/Seita.2G029500/Seita.2G035400/Seita.2G046600/Seita.2G053800/Seita.2G066600/Seita.2G153300/Seita.2G163700/Seita.2G202200/Seita.2G236000/Seita.2G263700/Seita.2G283000/Seita.2G285600/Seita.2G299200/Seita.2G310100/Seita.2G330500/Seita.2G343000/Seita.2G351600/Seita.2G352900/Seita.2G355000/Seita.3G143800/Seita.3G1…	79
Ci603DEG	BP	GO:0072330	monocarboxylic acid biosynthetic process	66/1938	218/9983	6.91233e-05	0.00822425	0.00781321	Seita.1G121100/Seita.1G371900/Seita.1G379700/Seita.2G042900/Seita.2G104900/Seita.2G105100/Seita.2G190100/Seita.2G290900/Seita.2G300900/Seita.3G015800/Seita.3G111200/Seita.3G183600/Seita.3G346000/Seita.3G391300/Seita.4G021600/Seita.4G065000/Seita.4G078000/Seita.4G078100/Seita.4G078200/Seita.4G110900/Seita.4G169900/Seita.4G267900/Seita.5G014400/Seita.5G087500/Seita.5G091900/Seita.5G130100/Seita.5G1…	66		Ci409DEG	CC	GO:0005576	extracellular region	23/211	384/9955	6.44778e-06	0.000296598	0.000257911	Seita.1G116400/Seita.1G295700/Seita.1G340400/Seita.2G044900/Seita.2G396200/Seita.3G067600/Seita.3G097400/Seita.3G263800/Seita.4G267900/Seita.5G014300/Seita.5G448400/Seita.5G467700/Seita.6G105300/Seita.6G138200/Seita.7G255200/Seita.7G257800/Seita.7G311600/Seita.8G003100/Seita.8G081300/Seita.8G230000/Seita.9G148700/Seita.9G208200/Seita.9G416100	23		Ci603DEG	CC	GO:0009535	chloroplast thylakoid membrane	74/1272	227/9955	3.37911e-15	1.62197e-13	1.51171e-13	Seita.1G013300/Seita.1G118300/Seita.1G192100/Seita.1G251800/Seita.1G303800/Seita.1G321900/Seita.2G029500/Seita.2G035400/Seita.2G046600/Seita.2G053800/Seita.2G066600/Seita.2G153300/Seita.2G163700/Seita.2G202200/Seita.2G236000/Seita.2G263700/Seita.2G283000/Seita.2G299200/Seita.2G310100/Seita.2G330500/Seita.2G343000/Seita.2G351600/Seita.2G352900/Seita.2G355000/Seita.3G143800/Seita.3G144000/Seita.3G1…	74
Ci603DEG	BP	GO:0006855	drug transmembrane transport	40/1938	115/9983	7.1338e-05	0.00822425	0.00781321	Seita.1G003300/Seita.1G041300/Seita.1G044800/Seita.1G270500/Seita.2G001400/Seita.2G278500/Seita.2G324100/Seita.2G360800/Seita.3G357100/Seita.3G357700/Seita.4G006500/Seita.4G181500/Seita.5G015100/Seita.5G048000/Seita.5G051800/Seita.5G124100/Seita.5G243600/Seita.5G274000/Seita.5G274100/Seita.5G302300/Seita.5G333300/Seita.6G186100/Seita.6G186200/Seita.6G252800/Seita.7G039700/Seita.7G040200/Seita.7G0…	40		Ci409DEG	CC	GO:0046658	anchored component of plasma membrane	11/211	119/9955	4.25174e-05	0.00146685	0.00127552	Seita.2G044900/Seita.2G154700/Seita.2G250200/Seita.2G305100/Seita.2G412000/Seita.3G263800/Seita.5G263600/Seita.5G448400/Seita.9G233400/Seita.9G363400/Seita.9G486000	11		Ci603DEG	CC	GO:0055035	plastid thylakoid membrane	75/1272	233/9955	4.70578e-15	1.93609e-13	1.80447e-13	Seita.1G013300/Seita.1G118300/Seita.1G192100/Seita.1G251800/Seita.1G303800/Seita.1G321900/Seita.2G029500/Seita.2G035400/Seita.2G046600/Seita.2G053800/Seita.2G066600/Seita.2G153300/Seita.2G163700/Seita.2G202200/Seita.2G236000/Seita.2G263700/Seita.2G283000/Seita.2G285600/Seita.2G299200/Seita.2G310100/Seita.2G330500/Seita.2G343000/Seita.2G351600/Seita.2G352900/Seita.2G355000/Seita.3G143800/Seita.3G1…	75
Ci603DEG	BP	GO:0098656	anion transmembrane transport	77/1938	265/9983	8.33221e-05	0.00916921	0.00871094	Seita.1G003300/Seita.1G041300/Seita.1G044800/Seita.1G114900/Seita.1G115700/Seita.1G115800/Seita.1G116000/Seita.1G116100/Seita.1G218600/Seita.1G268000/Seita.1G270500/Seita.1G286600/Seita.1G318800/Seita.1G333100/Seita.2G228300/Seita.2G240500/Seita.2G278500/Seita.2G352700/Seita.2G360800/Seita.2G368200/Seita.3G127900/Seita.3G283000/Seita.3G299000/Seita.3G350700/Seita.3G406500/Seita.4G006500/Seita.4G0…	77		Ci409DEG	CC	GO:0009505	plant-type cell wall	15/211	220/9955	6.64256e-05	0.00183335	0.00159421	Seita.1G099100/Seita.1G210300/Seita.1G340400/Seita.4G259700/Seita.5G053000/Seita.5G153500/Seita.5G263600/Seita.5G454800/Seita.5G463200/Seita.7G079300/Seita.8G081300/Seita.8G230000/Seita.9G208200/Seita.9G363400/Seita.9G486000	15		Ci603DEG	CC	GO:0009526	plastid envelope	103/1272	451/9955	1.13826e-09	4.09772e-08	3.81915e-08	Seita.1G013300/Seita.1G053900/Seita.1G057500/Seita.1G125900/Seita.1G160200/Seita.1G180800/Seita.1G206500/Seita.1G216200/Seita.1G253900/Seita.1G265400/Seita.1G272900/Seita.1G321900/Seita.2G029500/Seita.2G046600/Seita.2G083900/Seita.2G141700/Seita.2G151800/Seita.2G209700/Seita.2G235900/Seita.2G252100/Seita.2G263700/Seita.2G283000/Seita.2G288000/Seita.2G310100/Seita.2G312300/Seita.2G325800/Seita.2G3…	103
Ci603DEG	BP	GO:0008299	isoprenoid biosynthetic process	50/1938	155/9983	9.04585e-05	0.00917952	0.00872073	Seita.1G021400/Seita.1G034400/Seita.1G047500/Seita.1G055200/Seita.1G181900/Seita.1G223900/Seita.1G272600/Seita.1G317500/Seita.1G367300/Seita.1G379700/Seita.2G000900/Seita.2G042900/Seita.2G104900/Seita.2G105100/Seita.2G144900/Seita.2G187800/Seita.2G187900/Seita.2G300900/Seita.2G303000/Seita.2G368100/Seita.2G390100/Seita.3G015800/Seita.3G245500/Seita.4G021600/Seita.4G051800/Seita.4G101100/Seita.4G2…	50		Ci409DEG	CC	GO:0048046	apoplast	15/211	226/9955	9.01082e-05	0.00207249	0.00180216	Seita.1G340400/Seita.2G044900/Seita.3G263800/Seita.4G267900/Seita.5G014300/Seita.5G448400/Seita.6G105300/Seita.7G257800/Seita.7G311600/Seita.8G003100/Seita.8G081300/Seita.8G230000/Seita.9G148700/Seita.9G208200/Seita.9G416100	15		Ci603DEG	CC	GO:0009941	chloroplast envelope	99/1272	430/9955	1.54404e-09	4.94092e-08	4.60503e-08	Seita.1G013300/Seita.1G053900/Seita.1G057500/Seita.1G160200/Seita.1G180800/Seita.1G206500/Seita.1G216200/Seita.1G253900/Seita.1G272900/Seita.1G321900/Seita.2G029500/Seita.2G046600/Seita.2G083900/Seita.2G141700/Seita.2G151800/Seita.2G209700/Seita.2G235900/Seita.2G252100/Seita.2G263700/Seita.2G283000/Seita.2G288000/Seita.2G310100/Seita.2G312300/Seita.2G325800/Seita.2G330500/Seita.2G351600/Seita.2G3…	99
Ci603DEG	BP	GO:0006721	terpenoid metabolic process	51/1938	159/9983	9.0999e-05	0.00917952	0.00872073	Seita.1G021400/Seita.1G034400/Seita.1G055200/Seita.1G181900/Seita.1G272600/Seita.1G317500/Seita.1G367300/Seita.1G379700/Seita.2G000900/Seita.2G042900/Seita.2G104900/Seita.2G105100/Seita.2G144900/Seita.2G145800/Seita.2G145900/Seita.2G300900/Seita.2G303000/Seita.2G390100/Seita.3G015800/Seita.3G201400/Seita.3G408300/Seita.4G015700/Seita.4G021600/Seita.4G051800/Seita.4G101100/Seita.4G235500/Seita.5G0…	51		Ci409DEG	CC	GO:0031225	anchored component of membrane	11/211	142/9955	0.000210211	0.00414417	0.00360363	Seita.2G044900/Seita.2G154700/Seita.2G250200/Seita.2G305100/Seita.2G412000/Seita.3G263800/Seita.5G263600/Seita.5G448400/Seita.9G233400/Seita.9G363400/Seita.9G486000	11		Ci603DEG	CC	GO:0010287	plastoglobule	17/1272	47/9955	3.64696e-05	0.00105032	0.000978921	Seita.1G321900/Seita.2G029500/Seita.2G153300/Seita.2G351600/Seita.2G352900/Seita.3G143800/Seita.4G139900/Seita.4G199800/Seita.4G219400/Seita.7G056200/Seita.8G080900/Seita.8G173800/Seita.9G124200/Seita.9G177100/Seita.9G191500/Seita.9G195600/Seita.9G195900	17
Ci603DEG	BP	GO:0016143	S-glycoside metabolic process	24/1938	59/9983	0.00013161	0.0113796	0.0108108	Seita.1G063900/Seita.1G064000/Seita.1G064100/Seita.1G158700/Seita.1G270800/Seita.1G271000/Seita.2G042900/Seita.2G104900/Seita.2G105100/Seita.2G154400/Seita.2G278500/Seita.3G140700/Seita.4G181500/Seita.5G035900/Seita.5G047800/Seita.5G090200/Seita.5G146100/Seita.5G251200/Seita.5G302300/Seita.7G298100/Seita.8G026900/Seita.9G061300/Seita.9G061600/Seita.9G554000	24		Ci409DEG	CC	GO:0031226	intrinsic component of plasma membrane	16/211	331/9955	0.00179638	0.0309875	0.0269457	Seita.1G116500/Seita.2G044900/Seita.2G154700/Seita.2G250200/Seita.2G305100/Seita.2G412000/Seita.3G068400/Seita.3G263800/Seita.5G079300/Seita.5G263600/Seita.5G403300/Seita.5G448400/Seita.8G118200/Seita.9G233400/Seita.9G363400/Seita.9G486000	16		Ci603DEG	CC	GO:0031977	thylakoid lumen	17/1272	49/9955	6.73062e-05	0.0017622	0.0016424	Seita.1G125900/Seita.2G343000/Seita.2G355000/Seita.3G249600/Seita.3G333700/Seita.5G099500/Seita.6G127500/Seita.6G208100/Seita.6G230800/Seita.7G037600/Seita.7G225300/Seita.7G278200/Seita.8G173800/Seita.9G069300/Seita.9G093400/Seita.9G561800/Seita.J002400	17
Ci603DEG	BP	GO:0019757	glycosinolate metabolic process	24/1938	59/9983	0.00013161	0.0113796	0.0108108	Seita.1G063900/Seita.1G064000/Seita.1G064100/Seita.1G158700/Seita.1G270800/Seita.1G271000/Seita.2G042900/Seita.2G104900/Seita.2G105100/Seita.2G154400/Seita.2G278500/Seita.3G140700/Seita.4G181500/Seita.5G035900/Seita.5G047800/Seita.5G090200/Seita.5G146100/Seita.5G251200/Seita.5G302300/Seita.7G298100/Seita.8G026900/Seita.9G061300/Seita.9G061600/Seita.9G554000	24		Ci409DEG	MF	GO:0070011	peptidase activity, acting on L-amino acid peptides	15/193	222/8539	0.000145701	0.0234094	0.0214058	Seita.1G116400/Seita.1G295700/Seita.1G340400/Seita.3G016000/Seita.3G067600/Seita.3G120900/Seita.4G099200/Seita.4G138700/Seita.5G236800/Seita.5G303900/Seita.5G467700/Seita.7G079300/Seita.7G311600/Seita.8G003100/Seita.9G377000	15		Ci603DEG	CC	GO:0031226	intrinsic component of plasma membrane	66/1272	331/9955	0.000123319	0.00295965	0.00275845	Seita.1G020100/Seita.1G116600/Seita.1G135700/Seita.1G144500/Seita.1G216200/Seita.2G123000/Seita.2G123200/Seita.2G154700/Seita.2G199400/Seita.2G199500/Seita.2G220700/Seita.2G263300/Seita.2G291500/Seita.2G380300/Seita.2G412000/Seita.3G082100/Seita.3G146800/Seita.3G235900/Seita.3G244500/Seita.3G263800/Seita.3G315000/Seita.3G319400/Seita.3G333100/Seita.4G005300/Seita.4G098700/Seita.4G110300/Seita.5G0…	66
Ci603DEG	BP	GO:0019760	glucosinolate metabolic process	24/1938	59/9983	0.00013161	0.0113796	0.0108108	Seita.1G063900/Seita.1G064000/Seita.1G064100/Seita.1G158700/Seita.1G270800/Seita.1G271000/Seita.2G042900/Seita.2G104900/Seita.2G105100/Seita.2G154400/Seita.2G278500/Seita.3G140700/Seita.4G181500/Seita.5G035900/Seita.5G047800/Seita.5G090200/Seita.5G146100/Seita.5G251200/Seita.5G302300/Seita.7G298100/Seita.8G026900/Seita.9G061300/Seita.9G061600/Seita.9G554000	24		Ci409DEG	MF	GO:0004553	hydrolase activity, hydrolyzing O-glycosyl compounds	15/193	228/8539	0.000195546	0.0234094	0.0214058	Seita.2G044900/Seita.2G081000/Seita.2G279000/Seita.2G396200/Seita.3G263800/Seita.4G234100/Seita.5G448400/Seita.7G234500/Seita.7G257800/Seita.8G081300/Seita.8G230000/Seita.9G229700/Seita.9G350600/Seita.9G363400/Seita.9G465800	15		Ci603DEG	CC	GO:0005887	integral component of plasma membrane	43/1272	211/9955	0.0011363	0.0251734	0.023462	Seita.1G020100/Seita.1G116600/Seita.1G135700/Seita.1G144500/Seita.1G216200/Seita.2G123000/Seita.2G123200/Seita.2G220700/Seita.2G291500/Seita.3G082100/Seita.3G235900/Seita.3G244500/Seita.3G319400/Seita.3G333100/Seita.4G005300/Seita.4G098700/Seita.4G110300/Seita.5G029000/Seita.5G043400/Seita.5G124100/Seita.5G218600/Seita.5G284900/Seita.5G341100/Seita.5G403300/Seita.6G012100/Seita.6G022400/Seita.7G0…	43
Ci603DEG	BP	GO:0042537	benzene-containing compound metabolic process	24/1938	59/9983	0.00013161	0.0113796	0.0108108	Seita.1G121100/Seita.2G033500/Seita.2G178900/Seita.3G096900/Seita.3G097200/Seita.3G150700/Seita.4G110900/Seita.4G226900/Seita.4G227100/Seita.4G232000/Seita.5G091900/Seita.5G127500/Seita.5G434700/Seita.6G011600/Seita.6G011900/Seita.6G012200/Seita.6G125000/Seita.7G168500/Seita.7G168700/Seita.7G318900/Seita.7G319100/Seita.8G128800/Seita.9G064400/Seita.9G157600	24		Ci409DEG	MF	GO:0008233	peptidase activity	15/193	232/8539	0.000236459	0.0234094	0.0214058	Seita.1G116400/Seita.1G295700/Seita.1G340400/Seita.3G016000/Seita.3G067600/Seita.3G120900/Seita.4G099200/Seita.4G138700/Seita.5G236800/Seita.5G303900/Seita.5G467700/Seita.7G079300/Seita.7G311600/Seita.8G003100/Seita.9G377000	15		Ci603DEG	CC	GO:0005618	cell wall	85/1272	490/9955	0.00170657	0.0348195	0.0324524	Seita.1G004600/Seita.1G033600/Seita.1G053900/Seita.1G210300/Seita.1G225800/Seita.1G284500/Seita.1G317400/Seita.1G323700/Seita.2G027000/Seita.2G048400/Seita.2G109700/Seita.2G134000/Seita.2G154700/Seita.2G188200/Seita.2G193900/Seita.2G199400/Seita.2G199500/Seita.2G218700/Seita.2G225400/Seita.2G225500/Seita.2G380300/Seita.2G387600/Seita.3G071300/Seita.3G072000/Seita.3G146800/Seita.3G162800/Seita.3G1…	85
Ci603DEG	BP	GO:0006873	cellular ion homeostasis	41/1938	122/9983	0.000139724	0.0116645	0.0110815	Seita.1G130300/Seita.1G141800/Seita.1G169800/Seita.1G231200/Seita.1G274100/Seita.2G197500/Seita.2G397300/Seita.3G030500/Seita.3G049900/Seita.3G051000/Seita.3G166700/Seita.3G260800/Seita.4G138500/Seita.4G159500/Seita.4G175000/Seita.4G235900/Seita.4G259400/Seita.5G000800/Seita.5G103100/Seita.5G124100/Seita.5G270400/Seita.5G455700/Seita.6G123500/Seita.6G150900/Seita.7G218000/Seita.7G331800/Seita.8G0…	41		Ci409DEG	MF	GO:0016798	hydrolase activity, acting on glycosyl bonds	15/193	249/8539	0.000503846	0.0374106	0.0342085	Seita.2G044900/Seita.2G081000/Seita.2G279000/Seita.2G396200/Seita.3G263800/Seita.4G234100/Seita.5G448400/Seita.7G234500/Seita.7G257800/Seita.8G081300/Seita.8G230000/Seita.9G229700/Seita.9G350600/Seita.9G363400/Seita.9G465800	15		Ci603DEG	CC	GO:0030312	external encapsulating structure	85/1272	491/9955	0.00181352	0.0348195	0.0324524	Seita.1G004600/Seita.1G033600/Seita.1G053900/Seita.1G210300/Seita.1G225800/Seita.1G284500/Seita.1G317400/Seita.1G323700/Seita.2G027000/Seita.2G048400/Seita.2G109700/Seita.2G134000/Seita.2G154700/Seita.2G188200/Seita.2G193900/Seita.2G199400/Seita.2G199500/Seita.2G218700/Seita.2G225400/Seita.2G225500/Seita.2G380300/Seita.2G387600/Seita.3G071300/Seita.3G072000/Seita.3G146800/Seita.3G162800/Seita.3G1…	85
Ci603DEG	BP	GO:0015850	organic hydroxy compound transport	13/1938	24/9983	0.000154983	0.0120497	0.0114475	Seita.1G270500/Seita.2G278500/Seita.2G368900/Seita.4G181500/Seita.5G302300/Seita.7G148600/Seita.7G199400/Seita.7G204900/Seita.8G055700/Seita.8G092400/Seita.9G348500/Seita.9G351700/Seita.9G523900	13		Ci134up	BP	GO:0009415	response to water	27/291	347/9983	3.08279e-06	0.00441455	0.00419259	Seita.1G324300/Seita.2G142500/Seita.3G144000/Seita.3G162400/Seita.5G119800/Seita.5G166200/Seita.5G166300/Seita.5G351300/Seita.5G393800/Seita.6G114000/Seita.6G178100/Seita.7G039700/Seita.7G121500/Seita.7G184600/Seita.7G228200/Seita.8G008100/Seita.8G115200/Seita.8G115400/Seita.8G121700/Seita.8G125500/Seita.9G039200/Seita.9G157700/Seita.9G198800/Seita.9G229700/Seita.9G410800/Seita.9G420500/Seita.9G5…	27		Ci603DEG	MF	GO:0015318	inorganic molecular entity transmembrane transporter activity	94/1116	492/8539	6.31649e-05	0.0163128	0.0149606	Seita.1G001100/Seita.1G019500/Seita.1G020100/Seita.1G028000/Seita.1G127900/Seita.1G216200/Seita.1G218500/Seita.1G218600/Seita.1G231800/Seita.1G272900/Seita.1G278500/Seita.2G000400/Seita.2G026700/Seita.2G032600/Seita.2G090600/Seita.2G106700/Seita.2G123000/Seita.2G123200/Seita.2G141700/Seita.2G167400/Seita.2G224400/Seita.2G291500/Seita.2G335600/Seita.2G360800/Seita.2G368800/Seita.2G432200/Seita.3G0…	94
Ci603DEG	BP	GO:0071669	plant-type cell wall organization or biogenesis	74/1938	257/9983	0.000155635	0.0120497	0.0114475	Seita.1G080900/Seita.1G116500/Seita.1G123400/Seita.1G123500/Seita.1G213900/Seita.1G268900/Seita.1G309600/Seita.2G044900/Seita.2G199800/Seita.2G199900/Seita.2G209100/Seita.2G368200/Seita.2G382900/Seita.2G415500/Seita.3G046000/Seita.3G096400/Seita.3G136800/Seita.3G176900/Seita.3G190400/Seita.3G205300/Seita.3G217800/Seita.3G300900/Seita.3G337900/Seita.4G003000/Seita.4G008800/Seita.4G115200/Seita.4G1…	74		Ci134up	BP	GO:0009414	response to water deprivation	26/291	340/9983	6.48897e-06	0.0046461	0.0044125	Seita.1G324300/Seita.2G142500/Seita.3G144000/Seita.3G162400/Seita.5G119800/Seita.5G166200/Seita.5G166300/Seita.5G351300/Seita.5G393800/Seita.6G114000/Seita.6G178100/Seita.7G039700/Seita.7G121500/Seita.7G184600/Seita.7G228200/Seita.8G115200/Seita.8G115400/Seita.8G121700/Seita.8G125500/Seita.9G039200/Seita.9G157700/Seita.9G198800/Seita.9G229700/Seita.9G410800/Seita.9G420500/Seita.9G544600	26		Ci603DEG	MF	GO:0042578	phosphoric ester hydrolase activity	50/1116	224/8539	7.73365e-05	0.0163128	0.0149606	Seita.1G130300/Seita.1G262000/Seita.1G284500/Seita.1G288600/Seita.1G288700/Seita.1G323700/Seita.1G335000/Seita.2G143400/Seita.2G188200/Seita.2G192600/Seita.2G286900/Seita.2G387600/Seita.3G102100/Seita.3G139000/Seita.3G164700/Seita.3G166700/Seita.3G176900/Seita.3G249600/Seita.3G304100/Seita.3G405000/Seita.4G072200/Seita.4G245500/Seita.5G067300/Seita.5G121900/Seita.5G195800/Seita.5G236200/Seita.5G2…	50
Ci603DEG	BP	GO:0016131	brassinosteroid metabolic process	15/1938	30/9983	0.000159269	0.0120497	0.0114475	Seita.1G166600/Seita.2G229900/Seita.2G413200/Seita.3G114000/Seita.3G116300/Seita.3G201500/Seita.4G224700/Seita.5G139200/Seita.6G089500/Seita.7G204200/Seita.7G318000/Seita.8G166500/Seita.9G021400/Seita.9G173500/Seita.9G480100	15		Ci134up	BP	GO:0051315	attachment of mitotic spindle microtubules to kinetochore	5/291	12/9983	1.36132e-05	0.00649804	0.00617132	Seita.5G025500/Seita.5G026400/Seita.5G028100/Seita.8G146100/Seita.9G012300	5		Ci603DEG	MF	GO:0016705	oxidoreductase activity, acting on paired donors, with incorporation or reduction of molecular oxygen	39/1116	162/8539	8.63111e-05	0.0163128	0.0149606	Seita.1G296200/Seita.1G332100/Seita.2G107500/Seita.2G180200/Seita.2G219700/Seita.2G224300/Seita.2G253700/Seita.2G283800/Seita.3G026900/Seita.3G114000/Seita.3G116300/Seita.4G015700/Seita.5G035900/Seita.5G040100/Seita.5G044400/Seita.5G050500/Seita.5G139200/Seita.5G404900/Seita.6G089500/Seita.6G100500/Seita.6G101900/Seita.6G176700/Seita.6G205100/Seita.7G116400/Seita.7G116800/Seita.7G135700/Seita.7G1…	39
Ci603DEG	BP	GO:0071554	cell wall organization or biogenesis	109/1938	409/9983	0.000168488	0.0123609	0.0117431	Seita.1G080900/Seita.1G112800/Seita.1G116500/Seita.1G123400/Seita.1G123500/Seita.1G213900/Seita.1G240800/Seita.1G268900/Seita.1G287600/Seita.1G294300/Seita.1G309600/Seita.2G044900/Seita.2G072100/Seita.2G072400/Seita.2G191300/Seita.2G193300/Seita.2G199800/Seita.2G199900/Seita.2G209100/Seita.2G313800/Seita.2G368200/Seita.2G382900/Seita.2G383500/Seita.2G414200/Seita.2G415500/Seita.3G046000/Seita.3G0…	109		Ci134up	BP	GO:0009631	cold acclimation	7/291	35/9983	5.54724e-05	0.0185094	0.0175788	Seita.1G192100/Seita.3G144000/Seita.5G166200/Seita.5G166300/Seita.7G102200/Seita.8G115200/Seita.8G115400	7		Ci603DEG	MF	GO:0016791	phosphatase activity	44/1116	197/8539	0.000201647	0.025079	0.0230001	Seita.1G130300/Seita.1G262000/Seita.1G288600/Seita.1G288700/Seita.1G323700/Seita.1G335000/Seita.2G143400/Seita.2G188200/Seita.2G192600/Seita.2G286900/Seita.3G139000/Seita.3G164700/Seita.3G166700/Seita.3G176900/Seita.3G249600/Seita.3G304100/Seita.3G405000/Seita.4G072200/Seita.4G245500/Seita.5G067300/Seita.5G195800/Seita.5G236200/Seita.5G257700/Seita.5G296200/Seita.5G311400/Seita.5G448100/Seita.5G4…	44
Ci603DEG	BP	GO:0006812	cation transport	111/1938	419/9983	0.00018986	0.0135191	0.0128435	Seita.1G003300/Seita.1G019500/Seita.1G049200/Seita.1G055700/Seita.1G057900/Seita.1G067000/Seita.1G098100/Seita.1G113000/Seita.1G141800/Seita.1G165200/Seita.1G169800/Seita.1G190900/Seita.1G191100/Seita.1G231200/Seita.1G254300/Seita.1G259900/Seita.1G274100/Seita.1G286600/Seita.2G000400/Seita.2G049100/Seita.2G090300/Seita.2G090500/Seita.2G176800/Seita.2G197500/Seita.2G206200/Seita.2G217600/Seita.2G2…	111		Ci134up	BP	GO:0043200	response to amino acid	6/291	25/9983	6.4628e-05	0.0185094	0.0175788	Seita.2G352600/Seita.3G035800/Seita.5G166200/Seita.5G166300/Seita.8G115200/Seita.8G115400	6		Ci603DEG	MF	GO:0016168	chlorophyll binding	8/1116	15/8539	0.000228065	0.025079	0.0230001	Seita.2G351600/Seita.2G352900/Seita.3G143800/Seita.4G139900/Seita.4G219400/Seita.7G257400/Seita.8G080900/Seita.9G177100	8
Ci603DEG	BP	GO:0006820	anion transport	90/1938	328/9983	0.000211434	0.0146252	0.0138943	Seita.1G003300/Seita.1G041300/Seita.1G044800/Seita.1G069600/Seita.1G114900/Seita.1G115700/Seita.1G115800/Seita.1G116000/Seita.1G116100/Seita.1G218600/Seita.1G266400/Seita.1G268000/Seita.1G270500/Seita.1G271500/Seita.1G286600/Seita.1G318800/Seita.1G333100/Seita.2G228300/Seita.2G240500/Seita.2G278500/Seita.2G352700/Seita.2G360800/Seita.2G368200/Seita.3G116800/Seita.3G127900/Seita.3G283000/Seita.3G2…	90		Ci134up	BP	GO:0003333	amino acid transmembrane transport	9/291	64/9983	9.04816e-05	0.01851	0.0175793	Seita.1G268000/Seita.2G090200/Seita.4G161300/Seita.5G026800/Seita.5G365100/Seita.7G037100/Seita.7G125900/Seita.8G047400/Seita.9G431100	9		Ci603DEG	MF	GO:0016903	oxidoreductase activity, acting on the aldehyde or oxo group of donors	17/1116	53/8539	0.000265386	0.025079	0.0230001	Seita.1G253300/Seita.2G104900/Seita.2G105100/Seita.2G218400/Seita.2G306800/Seita.3G220500/Seita.4G227800/Seita.5G381100/Seita.6G151100/Seita.6G163400/Seita.6G244000/Seita.6G244100/Seita.7G127300/Seita.9G061600/Seita.9G131200/Seita.9G156800/Seita.9G201900	17
Ci603DEG	BP	GO:0016125	sterol metabolic process	26/1938	68/9983	0.000233459	0.0157001	0.0149154	Seita.1G047500/Seita.1G362600/Seita.2G229900/Seita.3G114000/Seita.3G116300/Seita.5G068300/Seita.5G139200/Seita.6G089500/Seita.6G208200/Seita.7G140400/Seita.7G204200/Seita.7G318000/Seita.8G041200/Seita.8G136000/Seita.8G136400/Seita.8G163100/Seita.8G166500/Seita.8G174000/Seita.9G021400/Seita.9G077900/Seita.9G173500/Seita.9G205600/Seita.9G205700/Seita.9G205800/Seita.9G480100/Seita.9G483700	26		Ci134up	BP	GO:0006865	amino acid transport	9/291	64/9983	9.04816e-05	0.01851	0.0175793	Seita.1G268000/Seita.2G090200/Seita.4G161300/Seita.5G026800/Seita.5G365100/Seita.7G037100/Seita.7G125900/Seita.8G047400/Seita.9G431100	9		Ci603DEG	MF	GO:0004497	monooxygenase activity	38/1116	167/8539	0.000363005	0.0274318	0.0251579	Seita.1G296200/Seita.2G003500/Seita.2G107500/Seita.2G219700/Seita.2G224300/Seita.2G283800/Seita.2G404300/Seita.2G434000/Seita.3G114000/Seita.3G116300/Seita.3G247600/Seita.4G043300/Seita.4G224700/Seita.5G035900/Seita.5G040100/Seita.5G044400/Seita.5G050500/Seita.5G123900/Seita.5G139200/Seita.5G461800/Seita.6G089500/Seita.6G100500/Seita.6G101900/Seita.6G176700/Seita.7G116400/Seita.7G116800/Seita.8G0…	38
Ci603DEG	BP	GO:0042592	homeostatic process	110/1938	418/9983	0.000267363	0.0174942	0.0166198	Seita.1G019500/Seita.1G063600/Seita.1G071600/Seita.1G130300/Seita.1G141800/Seita.1G155500/Seita.1G166600/Seita.1G169800/Seita.1G179000/Seita.1G206500/Seita.1G231200/Seita.1G256100/Seita.1G263000/Seita.1G274100/Seita.1G319500/Seita.1G333100/Seita.1G336800/Seita.2G038000/Seita.2G068400/Seita.2G090300/Seita.2G090500/Seita.2G197500/Seita.2G217400/Seita.2G229900/Seita.2G277900/Seita.2G302500/Seita.2G3…	110		Ci134up	BP	GO:0007080	mitotic metaphase plate congression	5/291	18/9983	0.000127497	0.022822	0.0216745	Seita.5G025500/Seita.5G026400/Seita.5G028100/Seita.8G146100/Seita.9G012300	5		Ci603DEG	MF	GO:0015103	inorganic anion transmembrane transporter activity	22/1116	80/8539	0.000428574	0.0274318	0.0251579	Seita.1G216200/Seita.1G218500/Seita.1G218600/Seita.1G231800/Seita.1G278500/Seita.2G167400/Seita.3G283100/Seita.3G406500/Seita.5G121600/Seita.5G124100/Seita.5G198500/Seita.5G295200/Seita.5G326900/Seita.5G424900/Seita.6G118800/Seita.7G157900/Seita.7G207100/Seita.7G265500/Seita.8G106000/Seita.9G235900/Seita.9G506200/Seita.9G540800	22
Ci603DEG	BP	GO:0016053	organic acid biosynthetic process	109/1938	415/9983	0.000307999	0.0191196	0.018164	Seita.1G009100/Seita.1G021400/Seita.1G034400/Seita.1G121100/Seita.1G127500/Seita.1G259400/Seita.1G291100/Seita.1G317500/Seita.1G371900/Seita.1G379700/Seita.2G000900/Seita.2G042900/Seita.2G104900/Seita.2G105100/Seita.2G144900/Seita.2G190100/Seita.2G223900/Seita.2G290900/Seita.2G300900/Seita.2G390100/Seita.3G015800/Seita.3G090300/Seita.3G111200/Seita.3G153400/Seita.3G183600/Seita.3G231000/Seita.3G3…	109		Ci134up	BP	GO:0008608	attachment of spindle microtubules to kinetochore	5/291	19/9983	0.000168933	0.0268791	0.0255276	Seita.5G025500/Seita.5G026400/Seita.5G028100/Seita.8G146100/Seita.9G012300	5		Ci603DEG	MF	GO:0016620	oxidoreductase activity, acting on the aldehyde or oxo group of donors, NAD or NADP as acceptor	15/1116	46/8539	0.000494192	0.0274318	0.0251579	Seita.1G253300/Seita.2G104900/Seita.2G105100/Seita.2G218400/Seita.2G306800/Seita.3G220500/Seita.4G227800/Seita.5G381100/Seita.6G151100/Seita.6G163400/Seita.6G244000/Seita.6G244100/Seita.7G127300/Seita.9G061600/Seita.9G201900	15
Ci603DEG	BP	GO:0046394	carboxylic acid biosynthetic process	109/1938	415/9983	0.000307999	0.0191196	0.018164	Seita.1G009100/Seita.1G021400/Seita.1G034400/Seita.1G121100/Seita.1G127500/Seita.1G259400/Seita.1G291100/Seita.1G317500/Seita.1G371900/Seita.1G379700/Seita.2G000900/Seita.2G042900/Seita.2G104900/Seita.2G105100/Seita.2G144900/Seita.2G190100/Seita.2G223900/Seita.2G290900/Seita.2G300900/Seita.2G390100/Seita.3G015800/Seita.3G090300/Seita.3G111200/Seita.3G153400/Seita.3G183600/Seita.3G231000/Seita.3G3…	109		Ci134up	BP	GO:0051310	metaphase plate congression	5/291	20/9983	0.000219912	0.0314914	0.029908	Seita.5G025500/Seita.5G026400/Seita.5G028100/Seita.8G146100/Seita.9G012300	5		Ci603DEG	MF	GO:0016709	oxidoreductase activity, acting on paired donors, with incorporation or reduction of molecular oxygen, NAD(P)H as one donor, and incorporation of one atom of oxygen	26/1116	102/8539	0.000495668	0.0274318	0.0251579	Seita.1G296200/Seita.2G107500/Seita.2G219700/Seita.2G224300/Seita.2G283800/Seita.3G114000/Seita.3G116300/Seita.5G035900/Seita.5G040100/Seita.5G044400/Seita.5G050500/Seita.5G139200/Seita.6G089500/Seita.6G100500/Seita.6G101900/Seita.6G176700/Seita.7G116400/Seita.7G116800/Seita.8G014200/Seita.8G068800/Seita.8G069000/Seita.9G189700/Seita.9G242900/Seita.9G244600/Seita.9G469300/Seita.J031600	26
Ci603DEG	BP	GO:0006979	response to oxidative stress	101/1938	380/9983	0.000321129	0.0194363	0.0184649	Seita.1G012200/Seita.1G044800/Seita.1G045200/Seita.1G063600/Seita.1G117500/Seita.1G144700/Seita.1G192000/Seita.1G192100/Seita.1G206500/Seita.1G210300/Seita.1G257600/Seita.1G263400/Seita.1G272900/Seita.1G295400/Seita.1G323700/Seita.1G336800/Seita.2G013400/Seita.2G033500/Seita.2G077200/Seita.2G081000/Seita.2G156100/Seita.2G178900/Seita.2G188200/Seita.2G219700/Seita.2G225400/Seita.2G225500/Seita.2G2…	101		Ci134up	BP	GO:0051303	establishment of chromosome localization	5/291	22/9983	0.000356069	0.0463537	0.0440231	Seita.5G025500/Seita.5G026400/Seita.5G028100/Seita.8G146100/Seita.9G012300	5		Ci603DEG	MF	GO:0015075	ion transmembrane transporter activity	90/1116	495/8539	0.000532187	0.0274318	0.0251579	Seita.1G001100/Seita.1G019500/Seita.1G020100/Seita.1G028000/Seita.1G044800/Seita.1G216200/Seita.1G218500/Seita.1G218600/Seita.1G231800/Seita.1G241300/Seita.1G272900/Seita.1G278500/Seita.2G000400/Seita.2G026700/Seita.2G032600/Seita.2G090600/Seita.2G106700/Seita.2G141700/Seita.2G167400/Seita.2G224400/Seita.2G335600/Seita.2G360800/Seita.2G368800/Seita.2G432200/Seita.3G006100/Seita.3G064700/Seita.3G1…	90
Ci603DEG	BP	GO:0015698	inorganic anion transport	33/1938	96/9983	0.000379802	0.0217728	0.0206847	Seita.1G114900/Seita.1G115700/Seita.1G115800/Seita.1G116000/Seita.1G116100/Seita.1G218600/Seita.1G271500/Seita.1G318800/Seita.2G228300/Seita.3G283000/Seita.3G406500/Seita.4G032500/Seita.4G140700/Seita.5G000800/Seita.5G124100/Seita.5G146100/Seita.5G198500/Seita.5G286900/Seita.5G326900/Seita.5G461300/Seita.6G058300/Seita.6G141000/Seita.7G157900/Seita.7G205800/Seita.7G213800/Seita.9G052300/Seita.9G1…	33		Ci134up	CC	GO:0015934	large ribosomal subunit	11/264	93/9955	3.29387e-05	0.00350845	0.00290873	Seita.1G214900/Seita.2G055300/Seita.2G143900/Seita.2G267400/Seita.3G162800/Seita.3G197300/Seita.6G112100/Seita.6G231500/Seita.7G134600/Seita.8G046000/Seita.9G544700	11		Ci603DEG	MF	GO:0004029	aldehyde dehydrogenase (NAD+) activity	8/1116	17/8539	0.000676299	0.0294971	0.027052	Seita.1G253300/Seita.2G104900/Seita.2G105100/Seita.2G218400/Seita.4G227800/Seita.6G151100/Seita.7G127300/Seita.9G061600	8
Ci603DEG	BP	GO:0030001	metal ion transport	70/1938	247/9983	0.000384565	0.0217728	0.0206847	Seita.1G019500/Seita.1G049200/Seita.1G067000/Seita.1G098100/Seita.1G113000/Seita.1G141800/Seita.1G165200/Seita.1G169800/Seita.1G231200/Seita.1G254300/Seita.1G274100/Seita.2G049100/Seita.2G090300/Seita.2G090500/Seita.2G197500/Seita.2G206200/Seita.2G217600/Seita.2G224400/Seita.2G260700/Seita.2G397300/Seita.2G427100/Seita.2G432200/Seita.3G030500/Seita.3G049900/Seita.3G112800/Seita.3G193100/Seita.4G1…	70		Ci134up	CC	GO:0000779	condensed chromosome, centromeric region	5/264	16/9955	4.34025e-05	0.00350845	0.00290873	Seita.5G025500/Seita.5G026400/Seita.5G028100/Seita.8G146100/Seita.9G012300	5		Ci603DEG	MF	GO:0004030	aldehyde dehydrogenase [NAD(P)+] activity	8/1116	17/8539	0.000676299	0.0294971	0.027052	Seita.1G253300/Seita.2G104900/Seita.2G105100/Seita.2G218400/Seita.4G227800/Seita.6G151100/Seita.7G127300/Seita.9G061600	8
Ci603DEG	BP	GO:0008610	lipid biosynthetic process	106/1938	404/9983	0.000386713	0.0217728	0.0206847	Seita.1G021400/Seita.1G034400/Seita.1G047500/Seita.1G055200/Seita.1G112000/Seita.1G181900/Seita.1G206500/Seita.1G223900/Seita.1G272600/Seita.1G288600/Seita.1G288700/Seita.1G295100/Seita.1G317500/Seita.1G367300/Seita.1G379700/Seita.2G000900/Seita.2G042900/Seita.2G104900/Seita.2G105100/Seita.2G144900/Seita.2G187800/Seita.2G187900/Seita.2G190100/Seita.2G229900/Seita.2G290900/Seita.2G300900/Seita.2G3…	106		Ci134up	CC	GO:0022625	cytosolic large ribosomal subunit	10/264	80/9955	4.65724e-05	0.00350845	0.00290873	Seita.1G214900/Seita.2G055300/Seita.2G267400/Seita.3G162800/Seita.3G197300/Seita.6G112100/Seita.6G231500/Seita.7G134600/Seita.8G046000/Seita.9G544700	10		Ci603DEG	MF	GO:0008509	anion transmembrane transporter activity	50/1116	245/8539	0.000744128	0.0301372	0.027639	Seita.1G001100/Seita.1G044800/Seita.1G216200/Seita.1G218500/Seita.1G218600/Seita.1G231800/Seita.1G241300/Seita.1G278500/Seita.2G026700/Seita.2G106700/Seita.2G141700/Seita.2G167400/Seita.2G335600/Seita.2G360800/Seita.3G064700/Seita.3G283100/Seita.3G333100/Seita.3G350700/Seita.3G406500/Seita.4G005300/Seita.4G138500/Seita.4G231500/Seita.5G026800/Seita.5G121600/Seita.5G124100/Seita.5G127600/Seita.5G1…	50
Ci603DEG	BP	GO:0009410	response to xenobiotic stimulus	11/1938	20/9983	0.000423954	0.0228087	0.0216688	Seita.1G089800/Seita.1G117500/Seita.3G038700/Seita.3G217600/Seita.5G008900/Seita.5G104100/Seita.8G041200/Seita.8G153700/Seita.9G205600/Seita.9G205700/Seita.9G205800	11		Ci134up	CC	GO:0044391	ribosomal subunit	14/264	163/9955	0.000106895	0.00518811	0.00430128	Seita.1G214900/Seita.2G055300/Seita.2G079700/Seita.2G143900/Seita.2G267400/Seita.2G389700/Seita.3G162800/Seita.3G197300/Seita.6G112100/Seita.6G231500/Seita.7G134600/Seita.8G046000/Seita.9G044700/Seita.9G544700	14		Ci603DEG	MF	GO:0015114	phosphate ion transmembrane transporter activity	6/1116	11/8539	0.00126413	0.0477841	0.0438231	Seita.1G216200/Seita.1G231800/Seita.2G167400/Seita.5G121600/Seita.6G118800/Seita.7G157900	6
Ci603DEG	BP	GO:0016132	brassinosteroid biosynthetic process	11/1938	20/9983	0.000423954	0.0228087	0.0216688	Seita.2G229900/Seita.3G114000/Seita.3G116300/Seita.5G139200/Seita.6G089500/Seita.7G204200/Seita.7G318000/Seita.8G166500/Seita.9G021400/Seita.9G173500/Seita.9G480100	11		Ci134up	CC	GO:0042788	polysomal ribosome	8/264	58/9955	0.000133671	0.00518811	0.00430128	Seita.2G055300/Seita.2G079700/Seita.2G267400/Seita.2G389700/Seita.3G197300/Seita.6G112100/Seita.8G046000/Seita.9G044700	8		Ci328DEG	BP	GO:0019684	photosynthesis, light reaction	31/1292	91/9983	1.67922e-07	0.000381351	0.000367484	Seita.1G208500/Seita.1G317800/Seita.2G046600/Seita.2G164500/Seita.2G202200/Seita.2G217800/Seita.2G248100/Seita.2G308700/Seita.2G330500/Seita.2G351600/Seita.2G352900/Seita.3G126900/Seita.3G249600/Seita.3G333700/Seita.4G099200/Seita.4G139900/Seita.4G219400/Seita.5G336700/Seita.5G348400/Seita.6G005700/Seita.6G082000/Seita.6G103300/Seita.7G111300/Seita.7G171400/Seita.8G080900/Seita.9G092700/Seita.9G1…	31
Ci603DEG	BP	GO:0016114	terpenoid biosynthetic process	41/1938	128/9983	0.000441967	0.0232609	0.0220984	Seita.1G021400/Seita.1G034400/Seita.1G055200/Seita.1G181900/Seita.1G272600/Seita.1G317500/Seita.1G367300/Seita.1G379700/Seita.2G000900/Seita.2G042900/Seita.2G104900/Seita.2G105100/Seita.2G144900/Seita.2G300900/Seita.2G303000/Seita.2G390100/Seita.3G015800/Seita.4G021600/Seita.4G051800/Seita.4G101100/Seita.4G235500/Seita.5G071800/Seita.5G087500/Seita.5G285200/Seita.5G315800/Seita.5G323400/Seita.5G4…	41		Ci134up	CC	GO:0000778	condensed nuclear chromosome kinetochore	4/264	11/9955	0.000137738	0.00518811	0.00430128	Seita.5G025500/Seita.5G026400/Seita.5G028100/Seita.9G012300	4		Ci328DEG	BP	GO:0009636	response to toxic substance	61/1292	252/9983	5.94057e-07	0.000421135	0.000405821	Seita.1G002000/Seita.1G012200/Seita.1G203000/Seita.1G239600/Seita.1G336800/Seita.1G341200/Seita.2G132500/Seita.2G199200/Seita.2G312300/Seita.2G324100/Seita.2G352900/Seita.3G049100/Seita.3G060800/Seita.3G145000/Seita.3G175700/Seita.3G192300/Seita.4G067200/Seita.4G110900/Seita.4G259700/Seita.5G046600/Seita.5G092400/Seita.5G171000/Seita.5G174100/Seita.5G207000/Seita.5G249900/Seita.5G261700/Seita.5G2…	61
Ci603DEG	BP	GO:0006875	cellular metal ion homeostasis	33/1938	97/9983	0.000470146	0.0242175	0.0230071	Seita.1G130300/Seita.1G141800/Seita.1G169800/Seita.1G231200/Seita.1G274100/Seita.2G197500/Seita.2G397300/Seita.3G030500/Seita.3G049900/Seita.3G051000/Seita.3G166700/Seita.3G260800/Seita.4G175000/Seita.4G235900/Seita.4G259400/Seita.5G103100/Seita.5G270400/Seita.5G455700/Seita.6G150900/Seita.7G218000/Seita.7G331800/Seita.8G041200/Seita.8G114700/Seita.8G118200/Seita.9G088000/Seita.9G090100/Seita.9G2…	33		Ci134up	CC	GO:0000777	condensed chromosome kinetochore	4/264	12/9955	0.000202313	0.0065318	0.00541528	Seita.5G025500/Seita.5G026400/Seita.5G028100/Seita.9G012300	4		Ci328DEG	BP	GO:0015698	inorganic anion transport	31/1292	96/9983	6.47991e-07	0.000421135	0.000405821	Seita.1G216200/Seita.1G218500/Seita.1G218600/Seita.1G257200/Seita.1G271500/Seita.1G275700/Seita.1G318800/Seita.1G360400/Seita.2G302200/Seita.3G283100/Seita.3G283600/Seita.3G300700/Seita.3G402300/Seita.3G406500/Seita.4G018900/Seita.4G032500/Seita.5G124100/Seita.5G198500/Seita.5G326900/Seita.6G058300/Seita.6G141000/Seita.7G157900/Seita.7G205800/Seita.7G207100/Seita.7G213800/Seita.9G136100/Seita.9G3…	31
Ci603DEG	BP	GO:0010200	response to chitin	35/1938	105/9983	0.000496439	0.0250391	0.0237877	Seita.1G034600/Seita.1G053800/Seita.1G064700/Seita.1G067400/Seita.1G185100/Seita.1G188700/Seita.1G257300/Seita.1G257600/Seita.1G309100/Seita.1G317600/Seita.2G013400/Seita.2G156100/Seita.2G156200/Seita.2G269700/Seita.2G291300/Seita.2G351400/Seita.3G007200/Seita.3G139200/Seita.4G067200/Seita.4G163600/Seita.4G197100/Seita.4G235200/Seita.4G277900/Seita.5G001000/Seita.5G044000/Seita.5G207000/Seita.5G2…	35		Ci134up	CC	GO:0000780	condensed nuclear chromosome, centromeric region	4/264	13/9955	0.000286161	0.00808405	0.00670219	Seita.5G025500/Seita.5G026400/Seita.5G028100/Seita.9G012300	4		Ci328DEG	BP	GO:0080167	response to karrikin	39/1292	136/9983	7.96919e-07	0.000421135	0.000405821	Seita.1G043800/Seita.1G057100/Seita.1G253100/Seita.1G346600/Seita.2G053300/Seita.2G053700/Seita.2G053800/Seita.2G081000/Seita.2G335600/Seita.3G049100/Seita.3G103400/Seita.3G270000/Seita.3G393100/Seita.3G406500/Seita.4G021300/Seita.4G043100/Seita.4G224000/Seita.4G276400/Seita.5G056800/Seita.5G236200/Seita.5G356600/Seita.5G356800/Seita.6G007700/Seita.6G008000/Seita.6G166300/Seita.7G046700/Seita.7G0…	39
Ci603DEG	BP	GO:0055065	metal ion homeostasis	44/1938	141/9983	0.000524206	0.0259001	0.0246056	Seita.1G019500/Seita.1G130300/Seita.1G141800/Seita.1G169800/Seita.1G206500/Seita.1G231200/Seita.1G274100/Seita.2G090300/Seita.2G090500/Seita.2G197500/Seita.2G309200/Seita.2G397300/Seita.3G030500/Seita.3G049900/Seita.3G051000/Seita.3G101400/Seita.3G166700/Seita.3G260800/Seita.3G375800/Seita.4G138500/Seita.4G175000/Seita.4G235900/Seita.4G259400/Seita.5G103100/Seita.5G270400/Seita.5G455700/Seita.6G1…	44		Ci134up	CC	GO:0005844	polysome	8/264	72/9955	0.000606368	0.0152266	0.0126238	Seita.2G055300/Seita.2G079700/Seita.2G267400/Seita.2G389700/Seita.3G197300/Seita.6G112100/Seita.8G046000/Seita.9G044700	8		Ci328DEG	BP	GO:0015979	photosynthesis	37/1292	128/9983	1.22817e-06	0.000421135	0.000405821	Seita.1G208500/Seita.1G317800/Seita.2G046600/Seita.2G051000/Seita.2G164500/Seita.2G202200/Seita.2G217800/Seita.2G248100/Seita.2G308700/Seita.2G330500/Seita.2G335600/Seita.2G351600/Seita.2G352900/Seita.3G126900/Seita.3G227500/Seita.3G249600/Seita.3G333700/Seita.4G099200/Seita.4G139900/Seita.4G219400/Seita.5G240100/Seita.5G336700/Seita.5G348400/Seita.6G005700/Seita.6G082000/Seita.6G103300/Seita.7G1…	37
Ci603DEG	BP	GO:0071466	cellular response to xenobiotic stimulus	9/1938	15/9983	0.000617064	0.0298782	0.0283849	Seita.1G089800/Seita.3G217600/Seita.5G008900/Seita.5G104100/Seita.8G041200/Seita.8G153700/Seita.9G205600/Seita.9G205700/Seita.9G205800	9		Ci134up	CC	GO:0022626	cytosolic ribosome	13/264	173/9955	0.000688111	0.0155513	0.012893	Seita.1G214900/Seita.2G055300/Seita.2G079700/Seita.2G267400/Seita.2G389700/Seita.3G162800/Seita.3G197300/Seita.6G112100/Seita.6G231500/Seita.7G134600/Seita.8G046000/Seita.9G044700/Seita.9G544700	13		Ci328DEG	BP	GO:0009644	response to high light intensity	27/1292	80/9983	1.28397e-06	0.000421135	0.000405821	Seita.1G012200/Seita.1G123800/Seita.1G257600/Seita.2G046600/Seita.2G053300/Seita.2G053700/Seita.2G053800/Seita.2G164500/Seita.2G352900/Seita.3G130700/Seita.3G175700/Seita.4G099200/Seita.4G139900/Seita.4G219400/Seita.5G014300/Seita.5G092400/Seita.5G207000/Seita.5G315500/Seita.6G082000/Seita.7G113700/Seita.9G272800/Seita.9G320700/Seita.9G424800/Seita.9G457400/Seita.9G488400/Seita.9G508400/Seita.9G5…	27
Ci603DEG	BP	GO:0098754	detoxification	40/1938	126/9983	0.000630549	0.0299325	0.0284365	Seita.1G002000/Seita.1G117500/Seita.1G192100/Seita.1G336800/Seita.2G033500/Seita.2G090300/Seita.2G090500/Seita.2G178900/Seita.2G406500/Seita.3G096900/Seita.3G097200/Seita.3G190400/Seita.3G203100/Seita.3G286500/Seita.4G040000/Seita.4G232000/Seita.4G259700/Seita.5G046600/Seita.5G053000/Seita.5G053100/Seita.5G053200/Seita.5G346500/Seita.5G442000/Seita.5G463200/Seita.6G090100/Seita.6G210000/Seita.7G0…	40		Ci134up	CC	GO:0005759	mitochondrial matrix	9/264	94/9955	0.000841853	0.0171449	0.0142142	Seita.1G266700/Seita.2G143900/Seita.2G445000/Seita.3G047800/Seita.4G024000/Seita.4G108300/Seita.5G021800/Seita.7G280800/Seita.9G192300	9		Ci328DEG	BP	GO:0009409	response to cold	80/1292	368/9983	1.29808e-06	0.000421135	0.000405821	Seita.1G062400/Seita.1G106800/Seita.1G127200/Seita.1G141800/Seita.1G238400/Seita.1G249200/Seita.1G257600/Seita.1G267200/Seita.1G275700/Seita.1G308900/Seita.1G319600/Seita.1G324300/Seita.1G341200/Seita.1G362000/Seita.2G053300/Seita.2G053700/Seita.2G053800/Seita.2G142500/Seita.2G164500/Seita.2G180200/Seita.2G185400/Seita.2G352700/Seita.2G401700/Seita.3G048500/Seita.3G064700/Seita.3G095700/Seita.3G1…	80
Ci603DEG	BP	GO:0007568	aging	59/1938	205/9983	0.000703488	0.0327528	0.0311158	Seita.1G144700/Seita.1G166500/Seita.1G206500/Seita.1G240800/Seita.1G362600/Seita.1G379700/Seita.2G072100/Seita.2G072400/Seita.2G154400/Seita.2G300900/Seita.2G309200/Seita.2G436000/Seita.2G436400/Seita.3G030000/Seita.3G120900/Seita.3G397200/Seita.4G017200/Seita.4G054000/Seita.4G054100/Seita.4G054900/Seita.4G067200/Seita.4G105900/Seita.4G155100/Seita.4G163600/Seita.4G226200/Seita.4G247100/Seita.5G0…	59		Ci134up	CC	GO:0005740	mitochondrial envelope	15/264	224/9955	0.000910347	0.0171449	0.0142142	Seita.1G210300/Seita.1G272900/Seita.2G257000/Seita.5G011600/Seita.5G011800/Seita.5G012100/Seita.5G015400/Seita.5G026800/Seita.6G208200/Seita.7G141600/Seita.9G190000/Seita.9G192300/Seita.9G386200/Seita.9G416100/Seita.9G431100	15		Ci328DEG	BP	GO:0006820	anion transport	71/1292	328/9983	6.03115e-06	0.00170756	0.00164547	Seita.1G044800/Seita.1G133400/Seita.1G216200/Seita.1G218500/Seita.1G218600/Seita.1G257200/Seita.1G268000/Seita.1G270500/Seita.1G271500/Seita.1G275700/Seita.1G318800/Seita.1G360400/Seita.2G090200/Seita.2G259500/Seita.2G302200/Seita.2G304200/Seita.2G335600/Seita.2G352700/Seita.2G360800/Seita.3G064700/Seita.3G223500/Seita.3G283100/Seita.3G283600/Seita.3G300700/Seita.3G323900/Seita.3G333100/Seita.3G4…	71
Ci603DEG	BP	GO:0009832	plant-type cell wall biogenesis	45/1938	147/9983	0.000721283	0.0329476	0.0313009	Seita.1G080900/Seita.1G116500/Seita.1G123400/Seita.1G123500/Seita.1G268900/Seita.1G309600/Seita.2G199800/Seita.2G199900/Seita.2G209100/Seita.2G368200/Seita.2G382900/Seita.2G415500/Seita.3G046000/Seita.3G096400/Seita.3G136800/Seita.3G176900/Seita.3G205300/Seita.3G217800/Seita.4G003000/Seita.4G115200/Seita.4G211600/Seita.4G223900/Seita.4G226900/Seita.4G227100/Seita.5G043700/Seita.5G122700/Seita.5G1…	45		Ci134up	CC	GO:0098798	mitochondrial protein complex	10/264	119/9955	0.00121827	0.0206154	0.0170915	Seita.1G210300/Seita.2G143900/Seita.2G445000/Seita.5G021800/Seita.5G026800/Seita.7G280800/Seita.9G190000/Seita.9G192300/Seita.9G386200/Seita.9G431100	10		Ci328DEG	BP	GO:0009415	response to water	74/1292	347/9983	6.76709e-06	0.00170756	0.00164547	Seita.1G081400/Seita.1G161800/Seita.1G177700/Seita.1G249200/Seita.1G267200/Seita.1G270500/Seita.1G319600/Seita.1G324300/Seita.2G132500/Seita.2G142500/Seita.2G164500/Seita.2G241600/Seita.2G284000/Seita.2G312300/Seita.2G352700/Seita.2G436000/Seita.3G048500/Seita.3G144000/Seita.3G162400/Seita.3G193800/Seita.3G337900/Seita.4G082000/Seita.4G112000/Seita.4G112200/Seita.4G227700/Seita.4G259700/Seita.5G0…	74
Ci603DEG	BP	GO:0016106	sesquiterpenoid biosynthetic process	17/1938	41/9983	0.000951152	0.0426433	0.040512	Seita.1G379700/Seita.2G042900/Seita.2G104900/Seita.2G105100/Seita.2G300900/Seita.3G015800/Seita.4G021600/Seita.5G087500/Seita.5G315800/Seita.7G096800/Seita.7G116400/Seita.7G189300/Seita.8G101900/Seita.8G168400/Seita.9G061300/Seita.9G061600/Seita.9G344800	17		Ci134up	CC	GO:0031966	mitochondrial membrane	14/264	209/9955	0.00133655	0.0206154	0.0170915	Seita.1G210300/Seita.1G272900/Seita.2G257000/Seita.5G011600/Seita.5G011800/Seita.5G012100/Seita.5G015400/Seita.5G026800/Seita.6G208200/Seita.7G141600/Seita.9G190000/Seita.9G192300/Seita.9G386200/Seita.9G431100	14		Ci328DEG	BP	GO:0009642	response to light intensity	35/1292	127/9983	7.7257e-06	0.00175451	0.00169071	Seita.1G012200/Seita.1G117200/Seita.1G123800/Seita.1G257600/Seita.2G046000/Seita.2G046600/Seita.2G053300/Seita.2G053700/Seita.2G053800/Seita.2G164500/Seita.2G335600/Seita.2G352900/Seita.3G130700/Seita.3G175700/Seita.4G099200/Seita.4G110900/Seita.4G139900/Seita.4G219400/Seita.5G014300/Seita.5G092400/Seita.5G207000/Seita.5G315500/Seita.6G005700/Seita.6G082000/Seita.7G113700/Seita.7G220500/Seita.9G1…	35
Ci603DEG	BP	GO:0090693	plant organ senescence	52/1938	178/9983	0.000980749	0.0431708	0.0410131	Seita.1G144700/Seita.1G166500/Seita.1G206500/Seita.1G240800/Seita.1G362600/Seita.1G379700/Seita.2G072100/Seita.2G072400/Seita.2G154400/Seita.2G300900/Seita.2G309200/Seita.2G436000/Seita.2G436400/Seita.3G030000/Seita.3G120900/Seita.4G017200/Seita.4G054000/Seita.4G054100/Seita.4G054900/Seita.4G067200/Seita.4G105900/Seita.4G155100/Seita.4G163600/Seita.4G226200/Seita.4G247100/Seita.5G064300/Seita.5G0…	52		Ci134up	CC	GO:0031305	integral component of mitochondrial inner membrane	4/264	19/9955	0.00136828	0.0206154	0.0170915	Seita.5G026800/Seita.9G190000/Seita.9G192300/Seita.9G431100	4		Ci328DEG	BP	GO:0006979	response to oxidative stress	79/1292	380/9983	9.00482e-06	0.00185909	0.00179149	Seita.1G012200/Seita.1G044800/Seita.1G063600/Seita.1G123800/Seita.1G193500/Seita.1G203000/Seita.1G210300/Seita.1G257600/Seita.1G272900/Seita.1G336800/Seita.1G341200/Seita.2G081000/Seita.2G188200/Seita.2G196200/Seita.2G312300/Seita.2G441700/Seita.3G060800/Seita.3G145000/Seita.3G175700/Seita.3G192300/Seita.4G016300/Seita.4G021300/Seita.4G067200/Seita.4G111400/Seita.4G194200/Seita.4G222300/Seita.4G2…	79
Ci603DEG	BP	GO:1901615	organic hydroxy compound metabolic process	75/1938	277/9983	0.00104083	0.0449975	0.0427485	Seita.1G000700/Seita.1G047500/Seita.1G157400/Seita.1G166600/Seita.1G362600/Seita.1G379700/Seita.2G042900/Seita.2G104900/Seita.2G105100/Seita.2G229900/Seita.2G300900/Seita.2G413200/Seita.3G015800/Seita.3G096900/Seita.3G097200/Seita.3G114000/Seita.3G116300/Seita.3G150700/Seita.3G165800/Seita.3G201500/Seita.3G346200/Seita.4G021600/Seita.4G110900/Seita.4G169900/Seita.4G224700/Seita.5G068300/Seita.5G0…	75		Ci134up	CC	GO:0000776	kinetochore	5/264	33/9955	0.0016311	0.0219387	0.0181886	Seita.5G025500/Seita.5G026400/Seita.5G028100/Seita.8G146100/Seita.9G012300	5		Ci328DEG	BP	GO:0006855	drug transmembrane transport	32/1292	115/9983	1.5114e-05	0.00264889	0.00255257	Seita.1G044800/Seita.1G207000/Seita.1G270500/Seita.2G238800/Seita.2G324100/Seita.2G360800/Seita.3G357100/Seita.3G357700/Seita.4G005300/Seita.4G006600/Seita.4G183800/Seita.4G222300/Seita.4G273500/Seita.5G015100/Seita.5G047700/Seita.5G124100/Seita.5G274000/Seita.5G333100/Seita.5G333300/Seita.6G186100/Seita.7G039700/Seita.7G039900/Seita.7G064100/Seita.7G064200/Seita.7G308000/Seita.8G006000/Seita.9G0…	32
Ci603DEG	BP	GO:0030003	cellular cation homeostasis	35/1938	109/9983	0.00106769	0.0453488	0.0430823	Seita.1G130300/Seita.1G141800/Seita.1G169800/Seita.1G231200/Seita.1G274100/Seita.2G197500/Seita.2G397300/Seita.3G030500/Seita.3G049900/Seita.3G051000/Seita.3G166700/Seita.3G260800/Seita.4G138500/Seita.4G175000/Seita.4G235900/Seita.4G259400/Seita.5G103100/Seita.5G124100/Seita.5G270400/Seita.5G455700/Seita.6G150900/Seita.7G218000/Seita.7G331800/Seita.8G041200/Seita.8G114700/Seita.8G118200/Seita.9G0…	35		Ci134up	CC	GO:0031304	intrinsic component of mitochondrial inner membrane	4/264	20/9955	0.00167505	0.0219387	0.0181886	Seita.5G026800/Seita.9G190000/Seita.9G192300/Seita.9G431100	4		Ci328DEG	BP	GO:0098656	anion transmembrane transport	59/1292	265/9983	1.51632e-05	0.00264889	0.00255257	Seita.1G044800/Seita.1G216200/Seita.1G218500/Seita.1G218600/Seita.1G268000/Seita.1G270500/Seita.1G318800/Seita.1G360400/Seita.2G090200/Seita.2G302200/Seita.2G304200/Seita.2G335600/Seita.2G352700/Seita.2G360800/Seita.3G064700/Seita.3G223500/Seita.3G283100/Seita.3G283600/Seita.3G300700/Seita.3G323900/Seita.3G333100/Seita.3G406500/Seita.4G005300/Seita.4G006600/Seita.4G032500/Seita.4G071500/Seita.4G2…	59
Ci603DEG	BP	GO:0016128	phytosteroid metabolic process	16/1938	38/9983	0.00109471	0.0456946	0.0434108	Seita.1G166600/Seita.2G229900/Seita.2G413200/Seita.3G114000/Seita.3G116300/Seita.3G201500/Seita.4G224700/Seita.5G139200/Seita.6G089500/Seita.7G204200/Seita.7G318000/Seita.8G166500/Seita.8G174000/Seita.9G021400/Seita.9G173500/Seita.9G480100	16		Ci134up	CC	GO:0005840	ribosome	14/264	215/9955	0.00174733	0.0219387	0.0181886	Seita.1G214900/Seita.2G055300/Seita.2G079700/Seita.2G143900/Seita.2G267400/Seita.2G389700/Seita.3G162800/Seita.3G197300/Seita.6G112100/Seita.6G231500/Seita.7G134600/Seita.8G046000/Seita.9G044700/Seita.9G544700	14		Ci328DEG	BP	GO:0015893	drug transport	32/1292	117/9983	2.21557e-05	0.00359397	0.00346328	Seita.1G044800/Seita.1G207000/Seita.1G270500/Seita.2G238800/Seita.2G324100/Seita.2G360800/Seita.3G357100/Seita.3G357700/Seita.4G005300/Seita.4G006600/Seita.4G183800/Seita.4G222300/Seita.4G273500/Seita.5G015100/Seita.5G047700/Seita.5G124100/Seita.5G274000/Seita.5G333100/Seita.5G333300/Seita.6G186100/Seita.7G039700/Seita.7G039900/Seita.7G064100/Seita.7G064200/Seita.7G308000/Seita.8G006000/Seita.9G0…	32
Ci603DEG	BP	GO:0010150	leaf senescence	50/1938	171/9983	0.00118886	0.0487834	0.0463452	Seita.1G144700/Seita.1G166500/Seita.1G206500/Seita.1G240800/Seita.1G362600/Seita.1G379700/Seita.2G072100/Seita.2G072400/Seita.2G154400/Seita.2G300900/Seita.2G309200/Seita.2G436000/Seita.2G436400/Seita.3G030000/Seita.3G120900/Seita.4G017200/Seita.4G054000/Seita.4G054100/Seita.4G054900/Seita.4G067200/Seita.4G105900/Seita.4G163600/Seita.4G226200/Seita.4G247100/Seita.5G064300/Seita.5G069100/Seita.5G1…	50		Ci134up	CC	GO:0005730	nucleolus	22/264	436/9955	0.00283638	0.0332527	0.0275686	Seita.1G210300/Seita.1G214900/Seita.2G055300/Seita.2G079700/Seita.2G267400/Seita.3G143200/Seita.4G122000/Seita.4G159500/Seita.5G003200/Seita.5G059300/Seita.5G131500/Seita.6G112100/Seita.6G123500/Seita.6G145100/Seita.6G231500/Seita.7G134600/Seita.8G046000/Seita.8G161700/Seita.9G044700/Seita.9G087300/Seita.9G414500/Seita.9G436100	22		Ci328DEG	BP	GO:0009767	photosynthetic electron transport chain	16/1292	41/9983	2.41948e-05	0.0036631	0.0035299	Seita.1G208500/Seita.1G317800/Seita.2G164500/Seita.2G202200/Seita.2G248100/Seita.2G330500/Seita.4G099200/Seita.6G005700/Seita.6G082000/Seita.6G103300/Seita.7G111300/Seita.7G171400/Seita.9G092700/Seita.9G342500/Seita.9G534200/Seita.J002400	16
Ci603DEG	CC	GO:0031226	intrinsic component of plasma membrane	118/1830	331/9955	2.71855e-14	8.80812e-12	8.72799e-12	Seita.1G003300/Seita.1G049200/Seita.1G067000/Seita.1G116500/Seita.1G127700/Seita.1G135500/Seita.1G135700/Seita.1G159600/Seita.1G213900/Seita.1G256300/Seita.1G259900/Seita.1G286600/Seita.1G318800/Seita.1G322500/Seita.1G333100/Seita.2G044900/Seita.2G049100/Seita.2G071100/Seita.2G123000/Seita.2G123200/Seita.2G123300/Seita.2G145300/Seita.2G199400/Seita.2G250200/Seita.2G260700/Seita.2G263300/Seita.2G2…	118		Ci134up	CC	GO:1990904	ribonucleoprotein complex	24/264	493/9955	0.00294272	0.0332527	0.0275686	Seita.1G203200/Seita.1G214900/Seita.2G055300/Seita.2G079700/Seita.2G143900/Seita.2G234200/Seita.2G267400/Seita.2G381700/Seita.2G389700/Seita.3G143200/Seita.3G162800/Seita.3G197300/Seita.4G122000/Seita.5G003200/Seita.6G112100/Seita.6G231500/Seita.7G134600/Seita.8G046000/Seita.8G161700/Seita.9G040900/Seita.9G044700/Seita.9G414500/Seita.9G436100/Seita.9G544700	24		Ci328DEG	BP	GO:0009414	response to water deprivation	70/1292	340/9983	4.04955e-05	0.00574782	0.00553882	Seita.1G081400/Seita.1G161800/Seita.1G177700/Seita.1G249200/Seita.1G267200/Seita.1G270500/Seita.1G319600/Seita.1G324300/Seita.2G132500/Seita.2G142500/Seita.2G164500/Seita.2G241600/Seita.2G284000/Seita.2G312300/Seita.2G352700/Seita.3G048500/Seita.3G144000/Seita.3G162400/Seita.3G193800/Seita.3G337900/Seita.4G082000/Seita.4G112000/Seita.4G112200/Seita.4G227700/Seita.4G259700/Seita.5G046600/Seita.5G0…	70
Ci603DEG	CC	GO:0005887	integral component of plasma membrane	75/1830	211/9955	1.77643e-09	2.87781e-07	2.85163e-07	Seita.1G003300/Seita.1G049200/Seita.1G067000/Seita.1G116500/Seita.1G135500/Seita.1G135700/Seita.1G259900/Seita.1G286600/Seita.1G318800/Seita.1G333100/Seita.2G049100/Seita.2G123000/Seita.2G123200/Seita.2G123300/Seita.2G260700/Seita.3G005500/Seita.3G043400/Seita.3G073300/Seita.3G076900/Seita.3G077500/Seita.3G082100/Seita.3G193100/Seita.3G244500/Seita.3G319200/Seita.3G319400/Seita.4G006500/Seita.4G0…	75		Ci134up	CC	GO:0000775	chromosome, centromeric region	6/264	55/9955	0.00320609	0.0345036	0.0286057	Seita.3G198100/Seita.5G025500/Seita.5G026400/Seita.5G028100/Seita.8G146100/Seita.9G012300	6		Ci328DEG	BP	GO:0042542	response to hydrogen peroxide	25/1292	85/9983	4.64789e-05	0.00620903	0.00598326	Seita.1G012200/Seita.3G060800/Seita.3G145000/Seita.3G175700/Seita.3G192300/Seita.4G067200/Seita.5G092400/Seita.5G207000/Seita.5G249900/Seita.5G261700/Seita.5G315500/Seita.5G384200/Seita.5G411200/Seita.7G124900/Seita.7G141400/Seita.7G301200/Seita.8G013500/Seita.8G019400/Seita.8G222300/Seita.9G028500/Seita.9G424800/Seita.9G425300/Seita.9G475200/Seita.9G488400/Seita.9G508400	25
Ci603DEG	CC	GO:0005618	cell wall	134/1830	490/9955	3.64932e-07	3.34958e-05	3.31911e-05	Seita.1G004600/Seita.1G092900/Seita.1G162600/Seita.1G162700/Seita.1G162800/Seita.1G180600/Seita.1G192800/Seita.1G210300/Seita.1G213900/Seita.1G287600/Seita.1G295700/Seita.1G318800/Seita.1G323700/Seita.2G027000/Seita.2G069000/Seita.2G069100/Seita.2G133900/Seita.2G134000/Seita.2G188200/Seita.2G193900/Seita.2G199400/Seita.2G218700/Seita.2G225400/Seita.2G225500/Seita.2G383500/Seita.2G396200/Seita.2G4…	134		Ci134up	MF	GO:0015171	amino acid transmembrane transporter activity	9/240	61/8539	4.56424e-05	0.0131247	0.0128343	Seita.1G268000/Seita.2G090200/Seita.4G161300/Seita.5G026800/Seita.5G365100/Seita.7G037100/Seita.7G125900/Seita.8G047400/Seita.9G431100	9		Ci328DEG	BP	GO:0015706	nitrate transport	13/1292	31/9983	5.78049e-05	0.00729305	0.00702785	Seita.1G218500/Seita.1G218600/Seita.1G257200/Seita.3G300700/Seita.3G402300/Seita.3G406500/Seita.5G198500/Seita.5G326900/Seita.6G058300/Seita.9G136100/Seita.9G327900/Seita.9G328000/Seita.J031500	13
Ci603DEG	CC	GO:0030312	external encapsulating structure	134/1830	491/9955	4.13528e-07	3.34958e-05	3.31911e-05	Seita.1G004600/Seita.1G092900/Seita.1G162600/Seita.1G162700/Seita.1G162800/Seita.1G180600/Seita.1G192800/Seita.1G210300/Seita.1G213900/Seita.1G287600/Seita.1G295700/Seita.1G318800/Seita.1G323700/Seita.2G027000/Seita.2G069000/Seita.2G069100/Seita.2G133900/Seita.2G134000/Seita.2G188200/Seita.2G193900/Seita.2G199400/Seita.2G218700/Seita.2G225400/Seita.2G225500/Seita.2G383500/Seita.2G396200/Seita.2G4…	134		Ci134up	MF	GO:0005198	structural molecule activity	19/240	250/8539	7.52513e-05	0.0131247	0.0128343	Seita.1G214900/Seita.2G055300/Seita.2G079700/Seita.2G143900/Seita.2G267400/Seita.2G389700/Seita.3G162800/Seita.3G197300/Seita.5G025500/Seita.5G026400/Seita.5G028100/Seita.6G112100/Seita.6G231500/Seita.7G134600/Seita.7G147500/Seita.7G147600/Seita.8G046000/Seita.9G044700/Seita.9G544700	19		Ci328DEG	BP	GO:0009765	photosynthesis, light harvesting	10/1292	20/9983	6.86216e-05	0.00820209	0.00790384	Seita.2G046600/Seita.2G217800/Seita.2G351600/Seita.2G352900/Seita.3G249600/Seita.4G099200/Seita.4G139900/Seita.4G219400/Seita.8G080900/Seita.9G177100	10
Ci603DEG	CC	GO:0046658	anchored component of plasma membrane	43/1830	119/9955	3.14764e-06	0.000203967	0.000202112	Seita.1G127700/Seita.1G159600/Seita.1G213900/Seita.1G256300/Seita.1G322500/Seita.2G044900/Seita.2G071100/Seita.2G145300/Seita.2G199400/Seita.2G250200/Seita.2G263300/Seita.2G298100/Seita.2G351200/Seita.2G375100/Seita.2G383500/Seita.2G412000/Seita.3G175800/Seita.3G217100/Seita.3G225200/Seita.3G315000/Seita.4G084200/Seita.4G169700/Seita.5G328200/Seita.5G343700/Seita.5G376800/Seita.5G392200/Seita.5G4…	43		Ci134up	MF	GO:0016151	nickel cation binding	4/240	10/8539	0.000111858	0.0131247	0.0128343	Seita.5G166200/Seita.5G166300/Seita.8G115200/Seita.8G115400	4		Ci328DEG	BP	GO:0000302	response to reactive oxygen species	45/1292	197/9983	8.02331e-05	0.00911047	0.00877919	Seita.1G012200/Seita.1G210300/Seita.1G257600/Seita.1G341200/Seita.2G196200/Seita.2G441700/Seita.3G060800/Seita.3G145000/Seita.3G175700/Seita.3G192300/Seita.4G016300/Seita.4G067200/Seita.4G111400/Seita.4G274700/Seita.5G092400/Seita.5G207000/Seita.5G249900/Seita.5G261700/Seita.5G315500/Seita.5G356000/Seita.5G384200/Seita.5G411200/Seita.6G053800/Seita.7G102200/Seita.7G113700/Seita.7G124900/Seita.7G1…	45
Ci603DEG	CC	GO:0031225	anchored component of membrane	48/1830	142/9955	7.37682e-06	0.000398348	0.000394725	Seita.1G127700/Seita.1G159600/Seita.1G213900/Seita.1G256300/Seita.1G322500/Seita.2G044900/Seita.2G071100/Seita.2G145300/Seita.2G199400/Seita.2G250200/Seita.2G263300/Seita.2G298100/Seita.2G351200/Seita.2G375100/Seita.2G383500/Seita.2G412000/Seita.3G102200/Seita.3G175800/Seita.3G217100/Seita.3G225200/Seita.3G315000/Seita.4G084200/Seita.4G105900/Seita.4G169700/Seita.4G253300/Seita.5G328200/Seita.5G3…	48		Ci134up	MF	GO:0016614	oxidoreductase activity, acting on CH-OH group of donors	11/240	115/8539	0.000372085	0.0264456	0.0258603	Seita.2G257000/Seita.3G056300/Seita.3G276100/Seita.4G119800/Seita.5G134300/Seita.6G208200/Seita.6G235000/Seita.7G280800/Seita.8G114900/Seita.8G121700/Seita.9G476100	11		Ci328DEG	BP	GO:0009845	seed germination	40/1292	176/9983	0.000219391	0.0237256	0.0228629	Seita.1G096900/Seita.1G201000/Seita.1G252000/Seita.1G346600/Seita.2G053300/Seita.2G053700/Seita.2G053800/Seita.2G169700/Seita.2G193000/Seita.2G377800/Seita.3G010200/Seita.3G139000/Seita.3G165800/Seita.3G193800/Seita.4G097900/Seita.4G143700/Seita.4G159500/Seita.4G238400/Seita.4G288100/Seita.5G121900/Seita.5G246000/Seita.5G246100/Seita.5G340800/Seita.5G389300/Seita.5G427300/Seita.6G123200/Seita.6G1…	40
Ci603DEG	CC	GO:0000325	plant-type vacuole	65/1830	214/9955	1.20226e-05	0.000556473	0.000551411	Seita.1G004600/Seita.1G114900/Seita.1G115700/Seita.1G115800/Seita.1G116000/Seita.1G116100/Seita.1G116500/Seita.1G117600/Seita.1G141800/Seita.1G162600/Seita.1G162700/Seita.1G162800/Seita.1G192800/Seita.1G252200/Seita.1G259900/Seita.1G271500/Seita.2G352700/Seita.2G412200/Seita.2G426700/Seita.3G049900/Seita.3G082100/Seita.3G120900/Seita.3G193100/Seita.3G267500/Seita.3G375800/Seita.4G155100/Seita.5G0…	65		Ci134up	MF	GO:0016616	oxidoreductase activity, acting on the CH-OH group of donors, NAD or NADP as acceptor	10/240	97/8539	0.000375647	0.0264456	0.0258603	Seita.2G257000/Seita.3G056300/Seita.3G276100/Seita.4G119800/Seita.5G134300/Seita.6G208200/Seita.6G235000/Seita.7G280800/Seita.8G121700/Seita.9G476100	10		Ci328DEG	BP	GO:0090351	seedling development	41/1292	183/9983	0.000254498	0.0258517	0.0249116	Seita.1G096900/Seita.1G201000/Seita.1G252000/Seita.1G346600/Seita.2G053300/Seita.2G053700/Seita.2G053800/Seita.2G169700/Seita.2G193000/Seita.2G377800/Seita.3G010200/Seita.3G139000/Seita.3G165800/Seita.3G193800/Seita.4G097900/Seita.4G143700/Seita.4G159500/Seita.4G238400/Seita.4G279000/Seita.4G288100/Seita.5G121900/Seita.5G246000/Seita.5G246100/Seita.5G340800/Seita.5G389300/Seita.5G427300/Seita.6G1…	41
Ci603DEG	CC	GO:0009505	plant-type cell wall	64/1830	220/9955	6.09659e-05	0.00246912	0.00244666	Seita.1G004600/Seita.1G092900/Seita.1G192800/Seita.1G210300/Seita.1G213900/Seita.1G287600/Seita.1G318800/Seita.2G027000/Seita.2G069000/Seita.2G069100/Seita.2G199400/Seita.2G218700/Seita.2G383500/Seita.2G432600/Seita.3G071400/Seita.3G101400/Seita.3G162000/Seita.3G190400/Seita.3G240700/Seita.4G021600/Seita.4G169700/Seita.4G255800/Seita.4G259700/Seita.4G271100/Seita.5G035500/Seita.5G046600/Seita.5G0…	64		Ci134up	MF	GO:0005200	structural constituent of cytoskeleton	5/240	24/8539	0.000461553	0.0270778	0.0264786	Seita.5G025500/Seita.5G026400/Seita.5G028100/Seita.7G147500/Seita.7G147600	5		Ci328DEG	BP	GO:0009773	photosynthetic electron transport in photosystem I	7/1292	12/9983	0.000261818	0.0258517	0.0249116	Seita.1G317800/Seita.2G202200/Seita.2G248100/Seita.6G103300/Seita.9G092700/Seita.9G342500/Seita.9G534200	7
Ci603DEG	CC	GO:0005871	kinesin complex	23/1830	59/9955	0.000164443	0.00591995	0.0058661	Seita.1G027900/Seita.1G052200/Seita.1G317100/Seita.1G360100/Seita.2G207800/Seita.2G406300/Seita.3G029800/Seita.3G151900/Seita.3G174700/Seita.3G251500/Seita.5G055100/Seita.5G179700/Seita.5G218400/Seita.5G233200/Seita.6G243300/Seita.7G058500/Seita.7G130100/Seita.8G146100/Seita.9G177700/Seita.9G284500/Seita.9G433300/Seita.9G449500/Seita.J002300	23		Ci134up	MF	GO:0003735	structural constituent of ribosome	14/240	182/8539	0.000594522	0.029896	0.0292344	Seita.1G214900/Seita.2G055300/Seita.2G079700/Seita.2G143900/Seita.2G267400/Seita.2G389700/Seita.3G162800/Seita.3G197300/Seita.6G112100/Seita.6G231500/Seita.7G134600/Seita.8G046000/Seita.9G044700/Seita.9G544700	14		Ci328DEG	BP	GO:0009408	response to heat	43/1292	199/9983	0.000417493	0.0395053	0.0380688	Seita.1G012200/Seita.1G162500/Seita.1G177700/Seita.1G240800/Seita.1G324300/Seita.1G326600/Seita.1G342400/Seita.2G053300/Seita.2G053700/Seita.2G053800/Seita.2G229700/Seita.2G241600/Seita.2G284200/Seita.2G332600/Seita.2G380300/Seita.3G175700/Seita.4G089700/Seita.4G111400/Seita.4G227700/Seita.5G092400/Seita.5G093000/Seita.5G131300/Seita.5G131400/Seita.5G207000/Seita.5G315500/Seita.5G328200/Seita.5G3…	43
Ci603DEG	CC	GO:0031012	extracellular matrix	12/1830	24/9955	0.000432374	0.0140089	0.0138815	Seita.1G162600/Seita.1G162700/Seita.1G162800/Seita.6G038000/Seita.6G038400/Seita.6G038500/Seita.6G038700/Seita.6G038800/Seita.6G038900/Seita.6G039000/Seita.6G039100/Seita.6G039200	12		Ci134up	MF	GO:0005342	organic acid transmembrane transporter activity	11/240	130/8539	0.00105065	0.0410922	0.0401829	Seita.1G268000/Seita.2G090200/Seita.2G335600/Seita.4G161300/Seita.5G026800/Seita.5G365100/Seita.7G037100/Seita.7G125900/Seita.8G047400/Seita.9G161200/Seita.9G431100	11		Ci328DEG	BP	GO:0010218	response to far red light	15/1292	46/9983	0.000446826	0.0405896	0.0391137	Seita.1G043800/Seita.1G117200/Seita.1G250600/Seita.2G053300/Seita.2G053700/Seita.2G053800/Seita.2G217800/Seita.2G351600/Seita.3G126900/Seita.3G140100/Seita.4G060600/Seita.4G139900/Seita.4G224000/Seita.8G080900/Seita.9G113600	15
Ci603DEG	MF	GO:0015318	inorganic molecular entity transmembrane transporter activity	144/1707	492/8539	2.5855e-07	0.000152545	0.000136079	Seita.1G003300/Seita.1G019500/Seita.1G049200/Seita.1G057900/Seita.1G067000/Seita.1G098100/Seita.1G113000/Seita.1G114900/Seita.1G115700/Seita.1G115800/Seita.1G116000/Seita.1G116100/Seita.1G141800/Seita.1G218600/Seita.1G259900/Seita.1G266400/Seita.1G268000/Seita.1G270500/Seita.1G272900/Seita.1G286600/Seita.1G318800/Seita.1G333100/Seita.2G000400/Seita.2G049100/Seita.2G123000/Seita.2G123200/Seita.2G1…	144		Ci134up	MF	GO:0046943	carboxylic acid transmembrane transporter activity	11/240	130/8539	0.00105065	0.0410922	0.0401829	Seita.1G268000/Seita.2G090200/Seita.2G335600/Seita.4G161300/Seita.5G026800/Seita.5G365100/Seita.7G037100/Seita.7G125900/Seita.8G047400/Seita.9G161200/Seita.9G431100	11		Ci328DEG	BP	GO:0006812	cation transport	78/1292	419/9983	0.000473505	0.0413589	0.039855	Seita.1G019500/Seita.1G055500/Seita.1G068700/Seita.1G113000/Seita.1G141800/Seita.1G165200/Seita.1G191000/Seita.1G207000/Seita.1G237300/Seita.1G274100/Seita.1G349900/Seita.2G000400/Seita.2G159000/Seita.2G176800/Seita.2G205100/Seita.2G206200/Seita.2G218500/Seita.2G330500/Seita.2G360800/Seita.2G368800/Seita.2G374400/Seita.2G432200/Seita.3G112800/Seita.3G120200/Seita.3G300700/Seita.3G357100/Seita.3G3…	78
Ci603DEG	MF	GO:0015075	ion transmembrane transporter activity	143/1707	495/8539	6.61546e-07	0.000189298	0.000168865	Seita.1G003300/Seita.1G019500/Seita.1G041300/Seita.1G044800/Seita.1G049200/Seita.1G057900/Seita.1G067000/Seita.1G098100/Seita.1G113000/Seita.1G114900/Seita.1G115700/Seita.1G115800/Seita.1G116000/Seita.1G116100/Seita.1G141800/Seita.1G218600/Seita.1G259900/Seita.1G266400/Seita.1G268000/Seita.1G270500/Seita.1G272900/Seita.1G286600/Seita.1G318800/Seita.1G333100/Seita.2G000400/Seita.2G049100/Seita.2G1…	143		Ci603up	BP	GO:0009414	response to water deprivation	30/321	340/9983	4.74871e-07	0.000333349	0.000324397	Seita.1G161800/Seita.1G267200/Seita.1G323900/Seita.1G324300/Seita.1G331600/Seita.2G035400/Seita.2G142500/Seita.2G284000/Seita.3G144000/Seita.3G157100/Seita.3G193800/Seita.4G021600/Seita.4G060700/Seita.5G119800/Seita.5G351300/Seita.5G393800/Seita.5G405100/Seita.6G073000/Seita.6G114000/Seita.6G151500/Seita.7G121500/Seita.7G184600/Seita.8G115200/Seita.8G115400/Seita.8G125500/Seita.9G039200/Seita.9G1…	30		Ci328DEG	BP	GO:0042445	hormone metabolic process	57/1292	288/9983	0.00058886	0.0491495	0.0473623	Seita.1G030600/Seita.1G345400/Seita.1G371900/Seita.2G000900/Seita.2G039300/Seita.2G104900/Seita.2G185400/Seita.2G229900/Seita.2G231300/Seita.2G390100/Seita.2G436000/Seita.3G048500/Seita.3G114000/Seita.3G147000/Seita.3G150700/Seita.3G201400/Seita.4G110900/Seita.4G224700/Seita.4G235500/Seita.4G235600/Seita.4G252000/Seita.4G288100/Seita.4G289300/Seita.5G044200/Seita.5G050500/Seita.5G063800/Seita.5G0…	57
Ci603DEG	MF	GO:0004497	monooxygenase activity	60/1707	167/8539	9.6253e-07	0.000189298	0.000168865	Seita.1G019400/Seita.1G166600/Seita.1G265100/Seita.1G367300/Seita.2G140600/Seita.2G145700/Seita.2G145800/Seita.2G145900/Seita.2G219700/Seita.2G224300/Seita.2G229900/Seita.2G283800/Seita.2G404300/Seita.2G413200/Seita.3G114000/Seita.3G116300/Seita.3G201400/Seita.3G201500/Seita.3G298400/Seita.3G339800/Seita.4G036200/Seita.4G145700/Seita.4G216300/Seita.4G224700/Seita.4G235500/Seita.5G035900/Seita.5G1…	60		Ci603up	BP	GO:0042273	ribosomal large subunit biogenesis	13/321	74/9983	5.50796e-07	0.000333349	0.000324397	Seita.1G214900/Seita.2G267400/Seita.4G122000/Seita.4G177300/Seita.6G017200/Seita.6G224900/Seita.7G064700/Seita.7G166100/Seita.7G228400/Seita.7G290900/Seita.8G046000/Seita.9G128300/Seita.9G233700	13		Ci328DEG	BP	GO:0010114	response to red light	16/1292	52/9983	0.000605983	0.0491495	0.0473623	Seita.1G043800/Seita.1G117200/Seita.2G053300/Seita.2G053700/Seita.2G053800/Seita.2G217800/Seita.2G351600/Seita.3G126900/Seita.3G134100/Seita.3G140100/Seita.4G060600/Seita.4G139900/Seita.4G224000/Seita.5G238500/Seita.8G080900/Seita.9G113600	16
Ci603DEG	MF	GO:0043492	ATPase activity, coupled to movement of substances	41/1707	112/8539	2.97505e-05	0.0043882	0.00391454	Seita.1G039400/Seita.1G049200/Seita.1G067000/Seita.2G179600/Seita.2G240500/Seita.2G260700/Seita.3G000700/Seita.3G116800/Seita.3G193100/Seita.3G260100/Seita.3G299000/Seita.4G140700/Seita.4G181500/Seita.5G146100/Seita.5G185300/Seita.5G221500/Seita.5G226500/Seita.5G287400/Seita.5G302300/Seita.6G098800/Seita.6G135900/Seita.6G136400/Seita.6G136500/Seita.6G214700/Seita.6G234600/Seita.7G032000/Seita.7G0…	41		Ci603up	BP	GO:0009415	response to water	30/321	347/9983	7.33173e-07	0.000333349	0.000324397	Seita.1G161800/Seita.1G267200/Seita.1G323900/Seita.1G324300/Seita.1G331600/Seita.2G035400/Seita.2G142500/Seita.2G284000/Seita.3G144000/Seita.3G157100/Seita.3G193800/Seita.4G021600/Seita.4G060700/Seita.5G119800/Seita.5G351300/Seita.5G393800/Seita.5G405100/Seita.6G073000/Seita.6G114000/Seita.6G151500/Seita.7G121500/Seita.7G184600/Seita.8G115200/Seita.8G115400/Seita.8G125500/Seita.9G039200/Seita.9G1…	30		Ci328DEG	CC	GO:0031976	plastid thylakoid	83/1230	297/9955	1.741e-13	2.45688e-11	2.36923e-11	Seita.1G008600/Seita.1G123800/Seita.1G208500/Seita.1G305900/Seita.1G317800/Seita.1G341200/Seita.2G046600/Seita.2G051000/Seita.2G053300/Seita.2G053700/Seita.2G053800/Seita.2G066600/Seita.2G163700/Seita.2G164500/Seita.2G202200/Seita.2G217800/Seita.2G236000/Seita.2G248100/Seita.2G252100/Seita.2G285600/Seita.2G308700/Seita.2G330500/Seita.2G343000/Seita.2G351600/Seita.2G352900/Seita.2G394800/Seita.2G4…	83
Ci603DEG	MF	GO:0042626	ATPase-coupled transmembrane transporter activity	39/1707	108/8539	6.54722e-05	0.0072163	0.00643738	Seita.1G039400/Seita.1G049200/Seita.1G067000/Seita.2G179600/Seita.2G240500/Seita.2G260700/Seita.3G000700/Seita.3G193100/Seita.3G260100/Seita.3G299000/Seita.4G140700/Seita.4G181500/Seita.5G146100/Seita.5G185300/Seita.5G221500/Seita.5G226500/Seita.5G287400/Seita.5G302300/Seita.6G098800/Seita.6G135900/Seita.6G136400/Seita.6G136500/Seita.6G214700/Seita.6G234600/Seita.7G032000/Seita.7G035300/Seita.7G0…	39		Ci603up	BP	GO:0000470	maturation of LSU-rRNA	8/321	26/9983	9.86596e-07	0.000336429	0.000327394	Seita.2G267400/Seita.4G122000/Seita.4G177300/Seita.6G017200/Seita.6G224900/Seita.7G064700/Seita.7G228400/Seita.9G128300	8		Ci328DEG	CC	GO:0009534	chloroplast thylakoid	82/1230	293/9955	2.25017e-13	2.45688e-11	2.36923e-11	Seita.1G008600/Seita.1G123800/Seita.1G208500/Seita.1G305900/Seita.1G317800/Seita.1G341200/Seita.2G046600/Seita.2G051000/Seita.2G053300/Seita.2G053700/Seita.2G053800/Seita.2G066600/Seita.2G163700/Seita.2G164500/Seita.2G202200/Seita.2G217800/Seita.2G236000/Seita.2G248100/Seita.2G252100/Seita.2G308700/Seita.2G330500/Seita.2G343000/Seita.2G351600/Seita.2G352900/Seita.2G394800/Seita.2G401700/Seita.3G1…	82
Ci603DEG	MF	GO:0005372	water transmembrane transporter activity	17/1707	34/8539	8.56171e-05	0.0072163	0.00643738	Seita.1G259900/Seita.1G318800/Seita.2G123000/Seita.2G123200/Seita.2G123300/Seita.3G073300/Seita.3G082100/Seita.4G098700/Seita.4G180100/Seita.5G007400/Seita.5G469800/Seita.7G170200/Seita.7G189600/Seita.8G085300/Seita.9G193500/Seita.9G268100/Seita.9G541300	17		Ci603up	BP	GO:0042254	ribosome biogenesis	24/321	256/9983	2.42541e-06	0.000661652	0.000643882	Seita.1G127200/Seita.1G214900/Seita.2G048400/Seita.2G267400/Seita.2G404800/Seita.3G280800/Seita.4G122000/Seita.4G177300/Seita.6G017200/Seita.6G224900/Seita.7G064700/Seita.7G099000/Seita.7G166100/Seita.7G228400/Seita.7G290900/Seita.8G046000/Seita.8G161700/Seita.9G057400/Seita.9G128300/Seita.9G131800/Seita.9G233700/Seita.9G404600/Seita.9G404700/Seita.9G517100	24		Ci328DEG	CC	GO:0009535	chloroplast thylakoid membrane	69/1230	227/9955	2.6136e-13	2.45688e-11	2.36923e-11	Seita.1G008600/Seita.1G208500/Seita.1G305900/Seita.1G317800/Seita.1G341200/Seita.2G046600/Seita.2G051000/Seita.2G053300/Seita.2G053700/Seita.2G053800/Seita.2G066600/Seita.2G163700/Seita.2G164500/Seita.2G202200/Seita.2G217800/Seita.2G236000/Seita.2G248100/Seita.2G308700/Seita.2G330500/Seita.2G343000/Seita.2G351600/Seita.2G352900/Seita.2G401700/Seita.3G144000/Seita.3G149000/Seita.3G249600/Seita.3G3…	69
Ci603DEG	MF	GO:0015250	water channel activity	17/1707	34/8539	8.56171e-05	0.0072163	0.00643738	Seita.1G259900/Seita.1G318800/Seita.2G123000/Seita.2G123200/Seita.2G123300/Seita.3G073300/Seita.3G082100/Seita.4G098700/Seita.4G180100/Seita.5G007400/Seita.5G469800/Seita.7G170200/Seita.7G189600/Seita.8G085300/Seita.9G193500/Seita.9G268100/Seita.9G541300	17		Ci603up	BP	GO:0006364	rRNA processing	18/321	162/9983	4.34006e-06	0.00098664	0.000960143	Seita.1G127200/Seita.2G267400/Seita.2G404800/Seita.3G280800/Seita.4G122000/Seita.4G177300/Seita.6G017200/Seita.6G224900/Seita.7G064700/Seita.7G228400/Seita.8G161700/Seita.9G057400/Seita.9G128300/Seita.9G131800/Seita.9G233700/Seita.9G404600/Seita.9G404700/Seita.9G517100	18		Ci328DEG	CC	GO:0055035	plastid thylakoid membrane	70/1230	233/9955	3.29783e-13	2.45688e-11	2.36923e-11	Seita.1G008600/Seita.1G208500/Seita.1G305900/Seita.1G317800/Seita.1G341200/Seita.2G046600/Seita.2G051000/Seita.2G053300/Seita.2G053700/Seita.2G053800/Seita.2G066600/Seita.2G163700/Seita.2G164500/Seita.2G202200/Seita.2G217800/Seita.2G236000/Seita.2G248100/Seita.2G285600/Seita.2G308700/Seita.2G330500/Seita.2G343000/Seita.2G351600/Seita.2G352900/Seita.2G401700/Seita.3G144000/Seita.3G149000/Seita.3G2…	70
Ci603DEG	MF	GO:0008509	anion transmembrane transporter activity	73/1707	245/8539	0.000133599	0.0098529	0.00878938	Seita.1G003300/Seita.1G041300/Seita.1G044800/Seita.1G114900/Seita.1G115700/Seita.1G115800/Seita.1G116000/Seita.1G116100/Seita.1G218600/Seita.1G268000/Seita.1G270500/Seita.1G286600/Seita.1G318800/Seita.1G333100/Seita.2G228300/Seita.2G240500/Seita.2G278500/Seita.2G352700/Seita.2G360800/Seita.2G368200/Seita.3G127900/Seita.3G283000/Seita.3G299000/Seita.3G350700/Seita.3G406500/Seita.4G006500/Seita.4G0…	73		Ci603up	BP	GO:0016072	rRNA metabolic process	18/321	172/9983	1.01075e-05	0.00196952	0.00191662	Seita.1G127200/Seita.2G267400/Seita.2G404800/Seita.3G280800/Seita.4G122000/Seita.4G177300/Seita.6G017200/Seita.6G224900/Seita.7G064700/Seita.7G228400/Seita.8G161700/Seita.9G057400/Seita.9G128300/Seita.9G131800/Seita.9G233700/Seita.9G404600/Seita.9G404700/Seita.9G517100	18		Ci328DEG	CC	GO:0034357	photosynthetic membrane	71/1230	244/9955	1.25237e-12	6.22011e-11	5.9982e-11	Seita.1G008600/Seita.1G208500/Seita.1G305900/Seita.1G317800/Seita.1G341200/Seita.2G046600/Seita.2G051000/Seita.2G053300/Seita.2G053700/Seita.2G053800/Seita.2G066600/Seita.2G163700/Seita.2G164500/Seita.2G202200/Seita.2G217800/Seita.2G236000/Seita.2G248100/Seita.2G285600/Seita.2G308700/Seita.2G330500/Seita.2G343000/Seita.2G351600/Seita.2G352900/Seita.2G401700/Seita.3G144000/Seita.3G149000/Seita.3G2…	71
Ci603DEG	MF	GO:0016705	oxidoreductase activity, acting on paired donors, with incorporation or reduction of molecular oxygen	52/1707	162/8539	0.000163419	0.010713	0.00955669	Seita.1G000700/Seita.1G019400/Seita.1G265100/Seita.2G140600/Seita.2G145700/Seita.2G145800/Seita.2G145900/Seita.2G219700/Seita.2G224300/Seita.2G229900/Seita.2G253700/Seita.2G283800/Seita.3G114000/Seita.3G116300/Seita.3G298400/Seita.3G339800/Seita.4G015700/Seita.4G145700/Seita.4G216300/Seita.4G235500/Seita.5G035900/Seita.5G130100/Seita.5G130200/Seita.5G139200/Seita.5G157700/Seita.5G323400/Seita.5G3…	52		Ci603up	BP	GO:0043043	peptide biosynthetic process	25/321	325/9983	4.69241e-05	0.00800055	0.00778569	Seita.1G214900/Seita.2G048400/Seita.2G267400/Seita.2G362700/Seita.3G111700/Seita.3G162800/Seita.3G264300/Seita.3G280800/Seita.4G023300/Seita.4G122000/Seita.4G177300/Seita.6G017200/Seita.6G085600/Seita.6G224900/Seita.7G064700/Seita.7G166100/Seita.7G228400/Seita.7G234800/Seita.7G290900/Seita.8G046000/Seita.9G044700/Seita.9G476100/Seita.9G502500/Seita.9G517100/Seita.9G544700	25		Ci328DEG	CC	GO:0042651	thylakoid membrane	71/1230	244/9955	1.25237e-12	6.22011e-11	5.9982e-11	Seita.1G008600/Seita.1G208500/Seita.1G305900/Seita.1G317800/Seita.1G341200/Seita.2G046600/Seita.2G051000/Seita.2G053300/Seita.2G053700/Seita.2G053800/Seita.2G066600/Seita.2G163700/Seita.2G164500/Seita.2G202200/Seita.2G217800/Seita.2G236000/Seita.2G248100/Seita.2G285600/Seita.2G308700/Seita.2G330500/Seita.2G343000/Seita.2G351600/Seita.2G352900/Seita.2G401700/Seita.3G144000/Seita.3G149000/Seita.3G2…	71
Ci603DEG	MF	GO:0016709	oxidoreductase activity, acting on paired donors, with incorporation or reduction of molecular oxygen, NAD(P)H as one donor, and incorporation of one atom of oxygen	36/1707	102/8539	0.000209322	0.01235	0.011017	Seita.1G019400/Seita.2G140600/Seita.2G145700/Seita.2G145800/Seita.2G145900/Seita.2G219700/Seita.2G224300/Seita.2G229900/Seita.2G283800/Seita.3G114000/Seita.3G116300/Seita.3G298400/Seita.3G339800/Seita.4G145700/Seita.4G216300/Seita.4G235500/Seita.5G035900/Seita.5G139200/Seita.6G023100/Seita.6G061400/Seita.6G089500/Seita.6G100500/Seita.6G132000/Seita.6G237000/Seita.7G096800/Seita.7G116400/Seita.7G1…	36		Ci603up	BP	GO:0043604	amide biosynthetic process	27/321	374/9983	7.00656e-05	0.00825322	0.00803157	Seita.1G214900/Seita.2G048400/Seita.2G267400/Seita.2G362700/Seita.3G111700/Seita.3G162800/Seita.3G264300/Seita.3G280800/Seita.4G023300/Seita.4G122000/Seita.4G177300/Seita.5G158800/Seita.6G017200/Seita.6G085600/Seita.6G224900/Seita.7G064700/Seita.7G166100/Seita.7G228400/Seita.7G234800/Seita.7G280800/Seita.7G290900/Seita.8G046000/Seita.9G044700/Seita.9G476100/Seita.9G502500/Seita.9G517100/Seita.9G5…	27		Ci328DEG	CC	GO:0009579	thylakoid	90/1230	359/9955	1.35925e-11	5.78654e-10	5.58009e-10	Seita.1G008600/Seita.1G123800/Seita.1G208500/Seita.1G305900/Seita.1G317800/Seita.1G324300/Seita.1G341200/Seita.1G364200/Seita.2G046600/Seita.2G051000/Seita.2G053300/Seita.2G053700/Seita.2G053800/Seita.2G066600/Seita.2G163700/Seita.2G164500/Seita.2G202200/Seita.2G217800/Seita.2G236000/Seita.2G248100/Seita.2G252100/Seita.2G285600/Seita.2G308700/Seita.2G330500/Seita.2G343000/Seita.2G351600/Seita.2G3…	90
Ci603DEG	MF	GO:0022804	active transmembrane transporter activity	74/1707	255/8539	0.000295785	0.0158648	0.0141524	Seita.1G019500/Seita.1G039400/Seita.1G041300/Seita.1G049200/Seita.1G057900/Seita.1G067000/Seita.1G141800/Seita.1G286600/Seita.2G000400/Seita.2G176800/Seita.2G179600/Seita.2G240500/Seita.2G260700/Seita.2G352200/Seita.2G368200/Seita.2G368900/Seita.3G000700/Seita.3G193100/Seita.3G209900/Seita.3G260100/Seita.3G299000/Seita.3G357100/Seita.3G357700/Seita.3G406500/Seita.4G138500/Seita.4G140700/Seita.4G1…	74		Ci603up	BP	GO:0006412	translation	24/321	315/9983	7.75057e-05	0.00825322	0.00803157	Seita.1G214900/Seita.2G048400/Seita.2G267400/Seita.2G362700/Seita.3G111700/Seita.3G162800/Seita.3G264300/Seita.3G280800/Seita.4G023300/Seita.4G122000/Seita.4G177300/Seita.6G017200/Seita.6G085600/Seita.6G224900/Seita.7G064700/Seita.7G166100/Seita.7G228400/Seita.7G234800/Seita.7G290900/Seita.8G046000/Seita.9G044700/Seita.9G502500/Seita.9G517100/Seita.9G544700	24		Ci328DEG	CC	GO:0031226	intrinsic component of plasma membrane	76/1230	331/9955	3.59888e-08	1.34058e-06	1.29276e-06	Seita.1G025100/Seita.1G045800/Seita.1G135500/Seita.1G216200/Seita.1G237300/Seita.1G318800/Seita.1G322500/Seita.1G372300/Seita.2G044900/Seita.2G123000/Seita.2G123200/Seita.2G123300/Seita.2G154700/Seita.2G199500/Seita.2G211200/Seita.2G220700/Seita.2G380300/Seita.3G068600/Seita.3G073300/Seita.3G082100/Seita.3G146800/Seita.3G182000/Seita.3G225200/Seita.3G244500/Seita.3G248900/Seita.3G263800/Seita.3G3…	76
Ci603DEG	MF	GO:1990939	ATP-dependent microtubule motor activity	12/1707	22/8539	0.000340869	0.0167594	0.0149504	Seita.1G317100/Seita.1G360100/Seita.3G029800/Seita.3G151900/Seita.5G055100/Seita.5G218400/Seita.6G243300/Seita.7G058500/Seita.9G177700/Seita.9G284500/Seita.9G449500/Seita.J002300	12		Ci603up	BP	GO:0022613	ribonucleoprotein complex biogenesis	24/321	315/9983	7.75057e-05	0.00825322	0.00803157	Seita.1G127200/Seita.1G214900/Seita.2G048400/Seita.2G267400/Seita.2G404800/Seita.3G280800/Seita.4G122000/Seita.4G177300/Seita.6G017200/Seita.6G224900/Seita.7G064700/Seita.7G099000/Seita.7G166100/Seita.7G228400/Seita.7G290900/Seita.8G046000/Seita.8G161700/Seita.9G057400/Seita.9G128300/Seita.9G131800/Seita.9G233700/Seita.9G404600/Seita.9G404700/Seita.9G517100	24		Ci328DEG	CC	GO:0031225	anchored component of membrane	37/1230	142/9955	5.95923e-06	0.000197317	0.000190277	Seita.1G045800/Seita.1G322500/Seita.2G044900/Seita.2G154700/Seita.2G199500/Seita.2G380300/Seita.3G032700/Seita.3G102200/Seita.3G146800/Seita.3G182000/Seita.3G225200/Seita.3G263800/Seita.3G315000/Seita.3G371700/Seita.4G084200/Seita.4G105900/Seita.4G106300/Seita.5G122100/Seita.5G263600/Seita.5G328200/Seita.5G390300/Seita.5G448000/Seita.5G448500/Seita.6G003500/Seita.6G201700/Seita.6G202800/Seita.7G0…	37
Ci603DEG	MF	GO:0004553	hydrolase activity, hydrolyzing O-glycosyl compounds	67/1707	228/8539	0.000383157	0.0173894	0.0155124	Seita.1G004600/Seita.1G098300/Seita.1G323700/Seita.2G044900/Seita.2G081000/Seita.2G188200/Seita.2G193300/Seita.2G237100/Seita.2G263300/Seita.2G279000/Seita.2G383500/Seita.2G396200/Seita.2G432600/Seita.3G011400/Seita.3G175800/Seita.3G225200/Seita.3G240700/Seita.3G250400/Seita.3G253500/Seita.3G270000/Seita.3G300900/Seita.3G315000/Seita.4G092100/Seita.4G148700/Seita.4G169700/Seita.4G191200/Seita.4G2…	67		Ci603up	BP	GO:0009687	abscisic acid metabolic process	7/321	34/9983	8.47104e-05	0.00825322	0.00803157	Seita.2G035400/Seita.2G042900/Seita.2G104900/Seita.4G021600/Seita.5G087500/Seita.6G193700/Seita.9G061600	7		Ci328DEG	CC	GO:0046658	anchored component of plasma membrane	32/1230	119/9955	1.24489e-05	0.000370978	0.000357743	Seita.1G045800/Seita.1G322500/Seita.2G044900/Seita.2G154700/Seita.2G199500/Seita.2G380300/Seita.3G146800/Seita.3G182000/Seita.3G225200/Seita.3G263800/Seita.3G315000/Seita.3G371700/Seita.4G084200/Seita.5G263600/Seita.5G328200/Seita.5G390300/Seita.5G448000/Seita.5G448500/Seita.6G003500/Seita.6G201700/Seita.6G202800/Seita.7G099100/Seita.8G220400/Seita.9G060800/Seita.9G112400/Seita.9G145500/Seita.9G1…	32
Ci603DEG	MF	GO:0003777	microtubule motor activity	23/1707	59/8539	0.00058413	0.0237609	0.0211962	Seita.1G027900/Seita.1G052200/Seita.1G317100/Seita.1G360100/Seita.2G207800/Seita.2G406300/Seita.3G029800/Seita.3G151900/Seita.3G174700/Seita.3G251500/Seita.5G055100/Seita.5G179700/Seita.5G218400/Seita.5G233200/Seita.6G243300/Seita.7G058500/Seita.7G130100/Seita.8G146100/Seita.9G177700/Seita.9G284500/Seita.9G433300/Seita.9G449500/Seita.J002300	23		Ci603up	BP	GO:0043288	apocarotenoid metabolic process	7/321	34/9983	8.47104e-05	0.00825322	0.00803157	Seita.2G035400/Seita.2G042900/Seita.2G104900/Seita.4G021600/Seita.5G087500/Seita.6G193700/Seita.9G061600	7		Ci328DEG	CC	GO:0031977	thylakoid lumen	16/1230	49/9955	0.000165883	0.00449392	0.00433359	Seita.1G208500/Seita.1G364200/Seita.2G164500/Seita.2G343000/Seita.3G249600/Seita.3G333700/Seita.5G099500/Seita.5G442500/Seita.6G127500/Seita.6G230800/Seita.7G171400/Seita.7G225300/Seita.7G278200/Seita.8G173800/Seita.9G069300/Seita.J002400	16
Ci603DEG	MF	GO:0048037	cofactor binding	59/1707	199/8539	0.000653118	0.0237609	0.0211962	Seita.1G034000/Seita.1G069500/Seita.1G117500/Seita.1G127500/Seita.1G221800/Seita.1G357800/Seita.1G357900/Seita.2G033500/Seita.2G042900/Seita.2G104900/Seita.2G105100/Seita.2G110300/Seita.2G178900/Seita.2G290900/Seita.2G309200/Seita.2G442100/Seita.3G009500/Seita.3G036400/Seita.3G038700/Seita.3G084500/Seita.3G193000/Seita.3G206500/Seita.3G281700/Seita.3G330000/Seita.3G346000/Seita.3G351700/Seita.3G3…	59		Ci603up	BP	GO:1902644	tertiary alcohol metabolic process	7/321	34/9983	8.47104e-05	0.00825322	0.00803157	Seita.2G035400/Seita.2G042900/Seita.2G104900/Seita.4G021600/Seita.5G087500/Seita.6G193700/Seita.9G061600	7		Ci328DEG	CC	GO:0010598	NAD(P)H dehydrogenase complex (plastoquinone)	7/1230	12/9955	0.000194582	0.00483212	0.00465973	Seita.1G317800/Seita.2G202200/Seita.3G359500/Seita.5G404400/Seita.5G460600/Seita.6G103300/Seita.9G534200	7
Ci603DEG	MF	GO:0016798	hydrolase activity, acting on glycosyl bonds	71/1707	249/8539	0.000673619	0.0237609	0.0211962	Seita.1G004600/Seita.1G098300/Seita.1G192000/Seita.1G323700/Seita.2G044900/Seita.2G081000/Seita.2G133200/Seita.2G188200/Seita.2G193300/Seita.2G237100/Seita.2G263300/Seita.2G279000/Seita.2G383500/Seita.2G396200/Seita.2G432600/Seita.3G011400/Seita.3G175800/Seita.3G225200/Seita.3G240700/Seita.3G250400/Seita.3G253500/Seita.3G270000/Seita.3G300900/Seita.3G315000/Seita.4G092100/Seita.4G148700/Seita.4G1…	71		Ci603up	BP	GO:0071215	cellular response to abscisic acid stimulus	20/321	249/9983	0.000151735	0.0129354	0.012588	Seita.1G161800/Seita.1G331600/Seita.2G193000/Seita.2G302100/Seita.3G139000/Seita.3G157100/Seita.3G160800/Seita.3G164700/Seita.3G193800/Seita.5G351300/Seita.5G393800/Seita.5G394300/Seita.6G073000/Seita.6G144900/Seita.6G193700/Seita.8G051100/Seita.8G060900/Seita.9G198800/Seita.9G205900/Seita.9G460200	20		Ci328DEG	CC	GO:0005887	integral component of plasma membrane	44/1230	211/9955	0.000292913	0.00671448	0.00647493	Seita.1G025100/Seita.1G135500/Seita.1G216200/Seita.1G237300/Seita.1G318800/Seita.1G372300/Seita.2G123000/Seita.2G123200/Seita.2G123300/Seita.2G211200/Seita.2G220700/Seita.3G068600/Seita.3G073300/Seita.3G082100/Seita.3G244500/Seita.3G248900/Seita.3G319400/Seita.3G333100/Seita.4G005300/Seita.4G006600/Seita.4G032500/Seita.4G101500/Seita.5G029000/Seita.5G043400/Seita.5G079300/Seita.5G096100/Seita.5G1…	44
Ci603DEG	MF	GO:0016722	oxidoreductase activity, oxidizing metal ions	16/1707	36/8539	0.000745661	0.0237609	0.0211962	Seita.3G151800/Seita.4G282400/Seita.5G271600/Seita.5G365900/Seita.5G378200/Seita.5G382800/Seita.7G330200/Seita.8G018100/Seita.8G210900/Seita.8G211000/Seita.8G212800/Seita.8G252500/Seita.9G192300/Seita.9G453900/Seita.9G507200/Seita.J004900	16		Ci603up	BP	GO:0097306	cellular response to alcohol	20/321	249/9983	0.000151735	0.0129354	0.012588	Seita.1G161800/Seita.1G331600/Seita.2G193000/Seita.2G302100/Seita.3G139000/Seita.3G157100/Seita.3G160800/Seita.3G164700/Seita.3G193800/Seita.5G351300/Seita.5G393800/Seita.5G394300/Seita.6G073000/Seita.6G144900/Seita.6G193700/Seita.8G051100/Seita.8G060900/Seita.9G198800/Seita.9G205900/Seita.9G460200	20		Ci328DEG	CC	GO:0009526	plastid envelope	80/1230	451/9955	0.000440628	0.00937909	0.00904448	Seita.1G008600/Seita.1G061300/Seita.1G123800/Seita.1G177700/Seita.1G216200/Seita.1G265400/Seita.1G265600/Seita.1G272900/Seita.1G341200/Seita.1G348100/Seita.2G031800/Seita.2G046600/Seita.2G051000/Seita.2G088200/Seita.2G132500/Seita.2G151800/Seita.2G164500/Seita.2G217800/Seita.2G241600/Seita.2G248100/Seita.2G252100/Seita.2G253200/Seita.2G312300/Seita.2G330500/Seita.2G351600/Seita.2G352900/Seita.2G3…	80
Ci603DEG	MF	GO:0046527	glucosyltransferase activity	38/1707	116/8539	0.000769251	0.0237609	0.0211962	Seita.1G089800/Seita.1G245200/Seita.1G268900/Seita.2G209100/Seita.3G155100/Seita.3G176900/Seita.3G194500/Seita.3G194600/Seita.3G337900/Seita.4G041500/Seita.4G121900/Seita.4G127200/Seita.4G211600/Seita.4G223900/Seita.4G226900/Seita.4G227100/Seita.4G228200/Seita.4G271600/Seita.5G064300/Seita.5G122700/Seita.5G127500/Seita.5G274700/Seita.5G319100/Seita.5G429100/Seita.7G079000/Seita.7G098500/Seita.7G1…	38		Ci603up	BP	GO:0009845	seed germination	16/321	176/9983	0.000170878	0.0137104	0.0133422	Seita.1G209000/Seita.1G335200/Seita.2G193000/Seita.2G302100/Seita.3G010200/Seita.3G139000/Seita.3G193800/Seita.4G143700/Seita.4G159500/Seita.5G053200/Seita.5G351300/Seita.5G393900/Seita.6G123500/Seita.6G144900/Seita.7G212900/Seita.9G460200	16		Ci328DEG	CC	GO:0009941	chloroplast envelope	75/1230	430/9955	0.00108	0.021456	0.0206906	Seita.1G061300/Seita.1G123800/Seita.1G177700/Seita.1G216200/Seita.1G272900/Seita.1G341200/Seita.1G348100/Seita.2G031800/Seita.2G046600/Seita.2G051000/Seita.2G088200/Seita.2G132500/Seita.2G151800/Seita.2G217800/Seita.2G241600/Seita.2G248100/Seita.2G252100/Seita.2G253200/Seita.2G312300/Seita.2G330500/Seita.2G351600/Seita.2G352900/Seita.2G360500/Seita.2G401700/Seita.2G418200/Seita.2G436600/Seita.3G0…	75
Ci603DEG	MF	GO:0016758	transferase activity, transferring hexosyl groups	69/1707	242/8539	0.000798174	0.0237609	0.0211962	Seita.1G089800/Seita.1G123400/Seita.1G123500/Seita.1G179000/Seita.1G245200/Seita.1G268900/Seita.1G294300/Seita.1G354800/Seita.2G072100/Seita.2G072400/Seita.2G209100/Seita.2G226400/Seita.2G362400/Seita.2G398700/Seita.3G155100/Seita.3G176900/Seita.3G194500/Seita.3G194600/Seita.3G217800/Seita.3G294100/Seita.3G337900/Seita.4G008800/Seita.4G041500/Seita.4G121900/Seita.4G127200/Seita.4G211600/Seita.4G2…	69		Ci603up	BP	GO:0006518	peptide metabolic process	26/321	378/9983	0.00020861	0.015808	0.0153834	Seita.1G214900/Seita.2G048400/Seita.2G267400/Seita.2G362700/Seita.3G111700/Seita.3G162800/Seita.3G264300/Seita.3G280800/Seita.4G023300/Seita.4G122000/Seita.4G177300/Seita.6G017200/Seita.6G085600/Seita.6G224900/Seita.7G064700/Seita.7G166100/Seita.7G228300/Seita.7G228400/Seita.7G234800/Seita.7G290900/Seita.8G046000/Seita.9G044700/Seita.9G476100/Seita.9G502500/Seita.9G517100/Seita.9G544700	26		Ci328DEG	CC	GO:0010287	plastoglobule	14/1230	47/9955	0.00117804	0.021941	0.0211583	Seita.1G123800/Seita.2G164500/Seita.2G217800/Seita.2G351600/Seita.2G352900/Seita.4G139900/Seita.4G219400/Seita.5G166000/Seita.7G084700/Seita.8G080900/Seita.8G173800/Seita.9G177100/Seita.9G191500/Seita.J017900	14
Ci603DEG	MF	GO:0035251	UDP-glucosyltransferase activity	29/1707	82/8539	0.000805455	0.0237609	0.0211962	Seita.1G089800/Seita.1G245200/Seita.3G155100/Seita.3G176900/Seita.3G194500/Seita.3G194600/Seita.4G041500/Seita.4G121900/Seita.4G127200/Seita.4G226900/Seita.4G227100/Seita.4G228200/Seita.4G271600/Seita.5G064300/Seita.5G127500/Seita.5G274700/Seita.5G319100/Seita.5G429100/Seita.7G079000/Seita.7G139300/Seita.7G173500/Seita.7G194200/Seita.7G318900/Seita.7G319100/Seita.8G083400/Seita.8G153700/Seita.9G3…	29		Ci603up	BP	GO:0043603	cellular amide metabolic process	30/321	469/9983	0.00024502	0.0175899	0.0171175	Seita.1G214900/Seita.2G048400/Seita.2G267400/Seita.2G362700/Seita.3G111700/Seita.3G162800/Seita.3G264300/Seita.3G280800/Seita.3G395300/Seita.4G023300/Seita.4G122000/Seita.4G177300/Seita.5G158800/Seita.6G017200/Seita.6G085600/Seita.6G224900/Seita.7G064700/Seita.7G166100/Seita.7G228300/Seita.7G228400/Seita.7G234800/Seita.7G280800/Seita.7G290900/Seita.8G046000/Seita.8G163100/Seita.9G044700/Seita.9G4…	30		Ci328DEG	CC	GO:0048046	apoplast	44/1230	226/9955	0.00132495	0.0232255	0.0223969	Seita.1G170500/Seita.1G324300/Seita.1G339500/Seita.1G341200/Seita.2G044900/Seita.2G168000/Seita.2G173700/Seita.2G223900/Seita.2G343000/Seita.2G418200/Seita.3G010200/Seita.3G032700/Seita.3G060800/Seita.3G130700/Seita.3G263800/Seita.3G315000/Seita.4G025700/Seita.4G036600/Seita.4G075600/Seita.4G191200/Seita.4G245500/Seita.5G014300/Seita.5G064500/Seita.5G240100/Seita.5G291800/Seita.5G448000/Seita.5G4…	44
Ci603DEG	MF	GO:0015399	primary active transmembrane transporter activity	39/1707	123/8539	0.00133038	0.0359479	0.0320677	Seita.1G039400/Seita.1G049200/Seita.1G067000/Seita.2G179600/Seita.2G240500/Seita.2G260700/Seita.3G000700/Seita.3G193100/Seita.3G260100/Seita.3G299000/Seita.4G140700/Seita.4G181500/Seita.5G146100/Seita.5G185300/Seita.5G221500/Seita.5G226500/Seita.5G287400/Seita.5G302300/Seita.6G098800/Seita.6G135900/Seita.6G136400/Seita.6G136500/Seita.6G214700/Seita.6G234600/Seita.7G032000/Seita.7G035300/Seita.7G0…	39		Ci603up	BP	GO:0090351	seedling development	16/321	183/9983	0.000267624	0.0177814	0.0173038	Seita.1G209000/Seita.1G335200/Seita.2G193000/Seita.2G302100/Seita.3G010200/Seita.3G139000/Seita.3G193800/Seita.4G143700/Seita.4G159500/Seita.5G053200/Seita.5G351300/Seita.5G393900/Seita.6G123500/Seita.6G144900/Seita.7G212900/Seita.9G460200	16		Ci328DEG	MF	GO:0015318	inorganic molecular entity transmembrane transporter activity	99/1128	492/8539	6.75081e-06	0.00372645	0.00345357	Seita.1G019500/Seita.1G025100/Seita.1G068700/Seita.1G113000/Seita.1G141800/Seita.1G207000/Seita.1G216200/Seita.1G218500/Seita.1G218600/Seita.1G237300/Seita.1G268000/Seita.1G270500/Seita.1G272900/Seita.1G318800/Seita.1G360400/Seita.1G372300/Seita.2G000400/Seita.2G090200/Seita.2G123000/Seita.2G123200/Seita.2G123300/Seita.2G176800/Seita.2G205100/Seita.2G302200/Seita.2G304200/Seita.2G335600/Seita.2G3…	99
Ci603DEG	MF	GO:0008574	ATP-dependent microtubule motor activity, plus-end-directed	9/1707	16/8539	0.00145467	0.0359479	0.0320677	Seita.1G317100/Seita.1G360100/Seita.3G151900/Seita.5G218400/Seita.6G243300/Seita.7G058500/Seita.9G177700/Seita.9G284500/Seita.9G449500	9		Ci603up	BP	GO:0010029	regulation of seed germination	10/321	82/9983	0.000281653	0.0177814	0.0173038	Seita.1G209000/Seita.1G335200/Seita.2G193000/Seita.2G302100/Seita.3G010200/Seita.3G139000/Seita.3G193800/Seita.4G143700/Seita.5G351300/Seita.6G144900	10		Ci328DEG	MF	GO:0008509	anion transmembrane transporter activity	55/1128	245/8539	3.92932e-05	0.00556543	0.00515789	Seita.1G044800/Seita.1G216200/Seita.1G218500/Seita.1G218600/Seita.1G268000/Seita.1G270500/Seita.1G318800/Seita.1G360400/Seita.2G090200/Seita.2G302200/Seita.2G335600/Seita.2G352700/Seita.2G360800/Seita.3G064700/Seita.3G223500/Seita.3G283100/Seita.3G283600/Seita.3G300700/Seita.3G323900/Seita.3G333100/Seita.3G406500/Seita.4G005300/Seita.4G006600/Seita.4G032500/Seita.4G138500/Seita.4G222300/Seita.4G2…	55
Ci603DEG	MF	GO:0008236	serine-type peptidase activity	22/1707	59/8539	0.00152321	0.0359479	0.0320677	Seita.1G046800/Seita.2G069000/Seita.2G069100/Seita.2G218700/Seita.4G242700/Seita.5G157800/Seita.5G303900/Seita.5G370200/Seita.6G235900/Seita.7G203700/Seita.7G206300/Seita.7G269800/Seita.7G277500/Seita.8G097000/Seita.8G134300/Seita.9G253700/Seita.9G262800/Seita.9G262900/Seita.9G340500/Seita.9G376900/Seita.9G377000/Seita.9G377100	22		Ci603up	BP	GO:0009738	abscisic acid-activated signaling pathway	18/321	223/9983	0.000304214	0.0177814	0.0173038	Seita.1G331600/Seita.2G193000/Seita.2G302100/Seita.3G139000/Seita.3G160800/Seita.3G164700/Seita.3G193800/Seita.5G351300/Seita.5G393800/Seita.5G394300/Seita.6G073000/Seita.6G144900/Seita.6G193700/Seita.8G051100/Seita.8G060900/Seita.9G198800/Seita.9G205900/Seita.9G460200	18		Ci328DEG	MF	GO:0015075	ion transmembrane transporter activity	96/1128	495/8539	4.39438e-05	0.00556543	0.00515789	Seita.1G019500/Seita.1G044800/Seita.1G068700/Seita.1G113000/Seita.1G141800/Seita.1G207000/Seita.1G216200/Seita.1G218500/Seita.1G218600/Seita.1G237300/Seita.1G268000/Seita.1G270500/Seita.1G272900/Seita.1G318800/Seita.1G360400/Seita.2G000400/Seita.2G090200/Seita.2G176800/Seita.2G205100/Seita.2G302200/Seita.2G335600/Seita.2G352700/Seita.2G360800/Seita.2G368800/Seita.2G432200/Seita.3G064700/Seita.3G1…	96
Ci603DEG	MF	GO:0016825	hydrolase activity, acting on acid phosphorus-nitrogen bonds	22/1707	59/8539	0.00152321	0.0359479	0.0320677	Seita.1G046800/Seita.2G069000/Seita.2G069100/Seita.2G218700/Seita.4G242700/Seita.5G157800/Seita.5G303900/Seita.5G370200/Seita.6G235900/Seita.7G203700/Seita.7G206300/Seita.7G269800/Seita.7G277500/Seita.8G097000/Seita.8G134300/Seita.9G253700/Seita.9G262800/Seita.9G262900/Seita.9G340500/Seita.9G376900/Seita.9G377000/Seita.9G377100	22		Ci603up	BP	GO:0009688	abscisic acid biosynthetic process	6/321	30/9983	0.000325905	0.0177814	0.0173038	Seita.2G035400/Seita.2G042900/Seita.2G104900/Seita.4G021600/Seita.5G087500/Seita.9G061600	6		Ci328DEG	MF	GO:0030247	polysaccharide binding	20/1128	60/8539	4.92206e-05	0.00556543	0.00515789	Seita.1G045800/Seita.1G201800/Seita.2G044900/Seita.2G380300/Seita.2G422000/Seita.3G182000/Seita.3G225200/Seita.3G263800/Seita.3G315000/Seita.5G328200/Seita.5G390300/Seita.5G448000/Seita.5G448500/Seita.6G128700/Seita.9G060800/Seita.9G112400/Seita.9G145500/Seita.9G150500/Seita.9G373900/Seita.9G479800	20
Ci603DEG	MF	GO:0017171	serine hydrolase activity	22/1707	59/8539	0.00152321	0.0359479	0.0320677	Seita.1G046800/Seita.2G069000/Seita.2G069100/Seita.2G218700/Seita.4G242700/Seita.5G157800/Seita.5G303900/Seita.5G370200/Seita.6G235900/Seita.7G203700/Seita.7G206300/Seita.7G269800/Seita.7G277500/Seita.8G097000/Seita.8G134300/Seita.9G253700/Seita.9G262800/Seita.9G262900/Seita.9G340500/Seita.9G376900/Seita.9G377000/Seita.9G377100	22		Ci603up	BP	GO:0043289	apocarotenoid biosynthetic process	6/321	30/9983	0.000325905	0.0177814	0.0173038	Seita.2G035400/Seita.2G042900/Seita.2G104900/Seita.4G021600/Seita.5G087500/Seita.9G061600	6		Ci328DEG	MF	GO:0015103	inorganic anion transmembrane transporter activity	24/1128	80/8539	6.3411e-05	0.00556543	0.00515789	Seita.1G216200/Seita.1G218500/Seita.1G218600/Seita.1G318800/Seita.1G360400/Seita.2G302200/Seita.3G283100/Seita.3G283600/Seita.3G300700/Seita.3G406500/Seita.4G032500/Seita.5G124100/Seita.5G198500/Seita.5G326900/Seita.6G058300/Seita.6G141000/Seita.7G157900/Seita.7G207100/Seita.9G136100/Seita.9G327900/Seita.9G328000/Seita.9G532700/Seita.9G540800/Seita.J031500	24
Ci603DEG	MF	GO:0004601	peroxidase activity	17/1707	42/8539	0.00183204	0.0415732	0.0370858	Seita.1G117500/Seita.1G192100/Seita.2G406500/Seita.3G190400/Seita.4G259700/Seita.5G046600/Seita.5G053000/Seita.5G053100/Seita.5G053200/Seita.5G463200/Seita.6G090100/Seita.6G210000/Seita.7G023900/Seita.7G225300/Seita.7G277800/Seita.9G186200/Seita.9G537300	17		Ci603up	BP	GO:1902645	tertiary alcohol biosynthetic process	6/321	30/9983	0.000325905	0.0177814	0.0173038	Seita.2G035400/Seita.2G042900/Seita.2G104900/Seita.4G021600/Seita.5G087500/Seita.9G061600	6		Ci328DEG	MF	GO:0030246	carbohydrate binding	24/1128	80/8539	6.3411e-05	0.00556543	0.00515789	Seita.1G045800/Seita.1G201800/Seita.2G044900/Seita.2G380300/Seita.2G422000/Seita.3G182000/Seita.3G225200/Seita.3G263800/Seita.3G315000/Seita.5G069300/Seita.5G328200/Seita.5G390300/Seita.5G448000/Seita.5G448500/Seita.6G114000/Seita.6G128700/Seita.9G060800/Seita.9G112400/Seita.9G145500/Seita.9G150500/Seita.9G373900/Seita.9G408000/Seita.9G424800/Seita.9G479800	24
Ci603DEG	MF	GO:0005509	calcium ion binding	30/1707	90/8539	0.00195142	0.0426421	0.0380394	Seita.1G019500/Seita.1G044800/Seita.1G107200/Seita.1G127700/Seita.1G130300/Seita.1G213900/Seita.1G231200/Seita.1G263400/Seita.3G029800/Seita.3G135500/Seita.3G166700/Seita.3G290500/Seita.3G375800/Seita.4G257500/Seita.5G255000/Seita.5G456800/Seita.5G456900/Seita.6G152400/Seita.7G149600/Seita.7G162000/Seita.7G162900/Seita.8G026400/Seita.8G176000/Seita.9G173100/Seita.9G309500/Seita.9G333800/Seita.9G4…	30		Ci603up	BP	GO:1900140	regulation of seedling development	10/321	84/9983	0.000343476	0.0179598	0.0174774	Seita.1G209000/Seita.1G335200/Seita.2G193000/Seita.2G302100/Seita.3G010200/Seita.3G139000/Seita.3G193800/Seita.4G143700/Seita.5G351300/Seita.6G144900	10		Ci328DEG	MF	GO:0016645	oxidoreductase activity, acting on the CH-NH group of donors	14/1128	35/8539	7.05761e-05	0.00556543	0.00515789	Seita.2G223900/Seita.2G260500/Seita.3G020400/Seita.3G165100/Seita.5G020900/Seita.5G291400/Seita.5G337500/Seita.5G447700/Seita.5G450800/Seita.5G456100/Seita.7G242500/Seita.9G039100/Seita.9G330700/Seita.9G507500	14
Ci603DEG	MF	GO:0003774	motor activity	23/1707	64/8539	0.00212301	0.0447348	0.0399061	Seita.1G027900/Seita.1G052200/Seita.1G317100/Seita.1G360100/Seita.2G207800/Seita.2G406300/Seita.3G029800/Seita.3G151900/Seita.3G174700/Seita.3G251500/Seita.5G055100/Seita.5G179700/Seita.5G218400/Seita.5G233200/Seita.6G243300/Seita.7G058500/Seita.7G130100/Seita.8G146100/Seita.9G177700/Seita.9G284500/Seita.9G433300/Seita.9G449500/Seita.J002300	23		Ci603up	BP	GO:0071229	cellular response to acid chemical	29/321	457/9983	0.000355509	0.0179598	0.0174774	Seita.1G161800/Seita.1G257200/Seita.1G331600/Seita.1G335200/Seita.2G144900/Seita.2G193000/Seita.2G302100/Seita.3G139000/Seita.3G144000/Seita.3G157100/Seita.3G160800/Seita.3G164700/Seita.3G193800/Seita.5G258500/Seita.5G351300/Seita.5G393800/Seita.5G394300/Seita.6G073000/Seita.6G144900/Seita.6G193700/Seita.8G051100/Seita.8G060900/Seita.8G150800/Seita.9G198800/Seita.9G205900/Seita.9G435700/Seita.9G4…	29		Ci328DEG	MF	GO:0015112	nitrate transmembrane transporter activity	11/1128	26/8539	0.000235486	0.0150932	0.0139879	Seita.1G218500/Seita.1G218600/Seita.3G300700/Seita.3G406500/Seita.5G198500/Seita.5G326900/Seita.6G058300/Seita.9G136100/Seita.9G327900/Seita.9G328000/Seita.J031500	11
Ci603DEG	MF	GO:0015112	nitrate transmembrane transporter activity	12/1707	26/8539	0.00229685	0.046729	0.0416851	Seita.1G114900/Seita.1G115700/Seita.1G115800/Seita.1G116000/Seita.1G116100/Seita.1G218600/Seita.3G406500/Seita.5G198500/Seita.5G326900/Seita.6G058300/Seita.9G101800/Seita.9G327900	12		Ci603up	BP	GO:0071396	cellular response to lipid	24/321	358/9983	0.000530364	0.0252895	0.0246103	Seita.1G161800/Seita.1G331600/Seita.1G335200/Seita.2G144900/Seita.2G193000/Seita.2G302100/Seita.3G139000/Seita.3G157100/Seita.3G160800/Seita.3G164700/Seita.3G193800/Seita.5G044300/Seita.5G258500/Seita.5G351300/Seita.5G393800/Seita.5G394300/Seita.6G073000/Seita.6G144900/Seita.6G193700/Seita.8G051100/Seita.8G060900/Seita.9G198800/Seita.9G205900/Seita.9G460200	24		Ci328DEG	MF	GO:0016168	chlorophyll binding	8/1128	15/8539	0.000246084	0.0150932	0.0139879	Seita.2G217800/Seita.2G351600/Seita.2G352900/Seita.4G139900/Seita.4G219400/Seita.8G080900/Seita.9G177100/Seita.J017900	8
Ci603DEG	MF	GO:0072341	modified amino acid binding	11/1707	23/8539	0.00245639	0.0469491	0.0418814	Seita.2G033500/Seita.2G178900/Seita.2G290900/Seita.3G038700/Seita.3G346000/Seita.4G232000/Seita.6G240000/Seita.8G115400/Seita.9G004800/Seita.9G064400/Seita.9G157600	11		Ci603up	BP	GO:0006979	response to oxidative stress	25/321	380/9983	0.000537679	0.0252895	0.0246103	Seita.1G012200/Seita.1G044800/Seita.1G045200/Seita.1G209000/Seita.1G210300/Seita.1G272900/Seita.1G335200/Seita.2G081000/Seita.2G219700/Seita.2G319600/Seita.3G111700/Seita.3G160800/Seita.4G169900/Seita.5G119800/Seita.5G207000/Seita.5G258500/Seita.5G393400/Seita.7G098700/Seita.8G228200/Seita.9G108100/Seita.9G183600/Seita.9G198800/Seita.9G319200/Seita.9G488400/Seita.9G552800	25		Ci409DEG	BP	GO:0019684	photosynthesis, light reaction	38/1114	91/9983	6.02096e-14	1.32822e-10	1.29419e-10	Seita.1G013300/Seita.1G118300/Seita.1G208500/Seita.1G317800/Seita.1G321900/Seita.2G166700/Seita.2G202200/Seita.2G217800/Seita.2G248100/Seita.2G308700/Seita.2G318800/Seita.2G330500/Seita.2G351600/Seita.2G352900/Seita.3G143800/Seita.3G249600/Seita.3G333700/Seita.4G099200/Seita.4G139900/Seita.4G219400/Seita.4G248300/Seita.5G164200/Seita.5G336700/Seita.5G348300/Seita.5G348400/Seita.6G005700/Seita.6G0…	38
Ci603DEG	MF	GO:0016684	oxidoreductase activity, acting on peroxide as acceptor	17/1707	43/8539	0.00247437	0.0469491	0.0418814	Seita.1G117500/Seita.1G192100/Seita.2G406500/Seita.3G190400/Seita.4G259700/Seita.5G046600/Seita.5G053000/Seita.5G053100/Seita.5G053200/Seita.5G463200/Seita.6G090100/Seita.6G210000/Seita.7G023900/Seita.7G225300/Seita.7G277800/Seita.9G186200/Seita.9G537300	17		Ci603up	BP	GO:0006714	sesquiterpenoid metabolic process	7/321	46/9983	0.000605504	0.0275303	0.0267909	Seita.2G035400/Seita.2G042900/Seita.2G104900/Seita.4G021600/Seita.5G087500/Seita.6G193700/Seita.9G061600	7		Ci409DEG	BP	GO:0015979	photosynthesis	44/1114	128/9983	2.19339e-12	2.41931e-09	2.35732e-09	Seita.1G013300/Seita.1G118300/Seita.1G208500/Seita.1G317800/Seita.1G321900/Seita.2G051000/Seita.2G166700/Seita.2G202200/Seita.2G217800/Seita.2G248100/Seita.2G308700/Seita.2G318800/Seita.2G330500/Seita.2G351600/Seita.2G352900/Seita.2G387600/Seita.2G389600/Seita.3G143800/Seita.3G227500/Seita.3G249600/Seita.3G333700/Seita.4G099200/Seita.4G139900/Seita.4G219400/Seita.4G248300/Seita.5G164200/Seita.5G2…	44
Ci603DEG	MF	GO:1901618	organic hydroxy compound transmembrane transporter activity	9/1707	17/8539	0.00254639	0.0469491	0.0418814	Seita.1G270500/Seita.2G278500/Seita.2G368900/Seita.7G148600/Seita.7G204900/Seita.8G092400/Seita.9G348500/Seita.9G351700/Seita.9G523900	9		Ci603up	BP	GO:0000463	maturation of LSU-rRNA from tricistronic rRNA transcript (SSU-rRNA, 5.8S rRNA, LSU-rRNA)	4/321	14/9983	0.000813296	0.0346667	0.0337357	Seita.6G017200/Seita.7G064700/Seita.7G228400/Seita.9G128300	4		Ci409DEG	BP	GO:0009765	photosynthesis, light harvesting	13/1114	20/9983	1.4224e-08	9.57628e-06	9.3309e-06	Seita.1G118300/Seita.2G166700/Seita.2G217800/Seita.2G351600/Seita.2G352900/Seita.3G143800/Seita.3G249600/Seita.4G099200/Seita.4G139900/Seita.4G219400/Seita.7G257400/Seita.8G080900/Seita.9G177100	13
Ci603DEG	MF	GO:0015103	inorganic anion transmembrane transporter activity	27/1707	80/8539	0.0026262	0.0469533	0.0418852	Seita.1G114900/Seita.1G115700/Seita.1G115800/Seita.1G116000/Seita.1G116100/Seita.1G218600/Seita.1G318800/Seita.2G228300/Seita.3G283000/Seita.3G406500/Seita.4G032500/Seita.4G140700/Seita.5G124100/Seita.5G146100/Seita.5G198500/Seita.5G326900/Seita.5G461300/Seita.6G058300/Seita.6G141000/Seita.7G157900/Seita.9G101800/Seita.9G184500/Seita.9G193500/Seita.9G235900/Seita.9G327900/Seita.9G532700/Seita.9G5…	27		Ci603up	BP	GO:0031118	rRNA pseudouridine synthesis	4/321	14/9983	0.000813296	0.0346667	0.0337357	Seita.2G404800/Seita.4G122000/Seita.8G161700/Seita.9G057400	4		Ci409DEG	BP	GO:0006091	generation of precursor metabolites and energy	57/1114	240/9983	1.73641e-08	9.57628e-06	9.3309e-06	Seita.1G013300/Seita.1G118300/Seita.1G208500/Seita.1G317800/Seita.1G321900/Seita.2G166700/Seita.2G202200/Seita.2G217800/Seita.2G248100/Seita.2G288000/Seita.2G308700/Seita.2G318800/Seita.2G330500/Seita.2G351600/Seita.2G352900/Seita.2G422000/Seita.3G111200/Seita.3G143800/Seita.3G235400/Seita.3G249600/Seita.3G333700/Seita.4G099200/Seita.4G139900/Seita.4G219400/Seita.4G248300/Seita.5G074200/Seita.5G1…	57
Ci603DEG	MF	GO:0016757	transferase activity, transferring glycosyl groups	76/1707	283/8539	0.00276756	0.0480254	0.0428416	Seita.1G089800/Seita.1G112000/Seita.1G123400/Seita.1G123500/Seita.1G162000/Seita.1G179000/Seita.1G245200/Seita.1G268900/Seita.1G294300/Seita.1G354800/Seita.2G072100/Seita.2G072400/Seita.2G209100/Seita.2G226400/Seita.2G362400/Seita.2G398700/Seita.3G046000/Seita.3G059500/Seita.3G155100/Seita.3G176900/Seita.3G194500/Seita.3G194600/Seita.3G217800/Seita.3G294100/Seita.3G337900/Seita.4G008800/Seita.4G0…	76		Ci603up	BP	GO:0000154	rRNA modification	6/321	36/9983	0.00090897	0.0375708	0.0365618	Seita.2G404800/Seita.4G122000/Seita.8G161700/Seita.9G057400/Seita.9G404600/Seita.9G404700	6		Ci409DEG	BP	GO:0009636	response to toxic substance	54/1114	252/9983	1.41857e-06	0.000625874	0.000609836	Seita.1G012200/Seita.1G079000/Seita.1G117500/Seita.1G192100/Seita.1G239600/Seita.1G245800/Seita.1G336800/Seita.1G341200/Seita.1G358900/Seita.2G179800/Seita.2G312300/Seita.2G324100/Seita.2G352900/Seita.3G016700/Seita.3G175700/Seita.4G011900/Seita.4G067200/Seita.4G101400/Seita.5G015400/Seita.5G046600/Seita.5G092400/Seita.5G157600/Seita.5G171000/Seita.5G174100/Seita.5G263000/Seita.5G315500/Seita.5G3…	54
Ci328DEG	BP	GO:0010200	response to chitin	46/1852	105/9983	1.91325e-09	4.58989e-06	4.31992e-06	Seita.1G034600/Seita.1G053800/Seita.1G064700/Seita.1G067400/Seita.1G185100/Seita.1G188700/Seita.1G253100/Seita.1G257600/Seita.1G309100/Seita.2G013400/Seita.2G156100/Seita.2G156200/Seita.2G179700/Seita.2G179800/Seita.2G195200/Seita.2G206000/Seita.2G269700/Seita.2G291300/Seita.3G007200/Seita.3G062400/Seita.3G139200/Seita.3G205500/Seita.3G237600/Seita.3G282000/Seita.3G287100/Seita.4G067200/Seita.4G1…	46		Ci603up	CC	GO:0042788	polysomal ribosome	17/310	58/9955	9.79907e-13	1.62665e-10	1.38218e-10	Seita.2G267400/Seita.3G280800/Seita.4G177300/Seita.6G017200/Seita.6G085600/Seita.6G112100/Seita.6G224900/Seita.7G099000/Seita.7G166100/Seita.7G228400/Seita.7G290900/Seita.7G314300/Seita.8G046000/Seita.9G044700/Seita.9G131800/Seita.9G502500/Seita.9G517100	17		Ci409DEG	BP	GO:0009767	photosynthetic electron transport chain	16/1114	41/9983	3.5493e-06	0.00130496	0.00127152	Seita.1G013300/Seita.1G208500/Seita.1G317800/Seita.1G321900/Seita.2G202200/Seita.2G248100/Seita.2G330500/Seita.4G099200/Seita.6G005700/Seita.6G082000/Seita.6G103300/Seita.9G092700/Seita.9G294600/Seita.9G342500/Seita.9G534200/Seita.J002400	16
Ci328DEG	BP	GO:0019748	secondary metabolic process	96/1852	305/9983	2.44546e-08	2.93333e-05	2.76079e-05	Seita.1G019400/Seita.1G057100/Seita.1G062400/Seita.1G064100/Seita.1G198900/Seita.1G219200/Seita.1G230100/Seita.1G253000/Seita.1G270800/Seita.1G271000/Seita.1G281500/Seita.2G033500/Seita.2G104900/Seita.2G107500/Seita.2G132800/Seita.2G145700/Seita.2G145800/Seita.2G145900/Seita.2G178900/Seita.2G219700/Seita.2G278500/Seita.2G283800/Seita.2G300900/Seita.2G400600/Seita.3G015800/Seita.3G096900/Seita.3G0…	96		Ci603up	CC	GO:0044391	ribosomal subunit	25/310	163/9955	3.18116e-11	2.50637e-09	2.1297e-09	Seita.1G214900/Seita.2G048400/Seita.2G267400/Seita.2G362700/Seita.3G162800/Seita.3G280800/Seita.4G023300/Seita.4G177300/Seita.6G017200/Seita.6G085600/Seita.6G112100/Seita.6G224900/Seita.7G064700/Seita.7G099000/Seita.7G166100/Seita.7G228400/Seita.7G234800/Seita.7G290900/Seita.7G314300/Seita.8G046000/Seita.9G044700/Seita.9G131800/Seita.9G502500/Seita.9G517100/Seita.9G544700	25		Ci409DEG	BP	GO:0009773	photosynthetic electron transport in photosystem I	8/1114	12/9983	7.69125e-06	0.00242384	0.00236173	Seita.1G317800/Seita.1G321900/Seita.2G202200/Seita.2G248100/Seita.6G103300/Seita.9G092700/Seita.9G342500/Seita.9G534200	8
Ci328DEG	BP	GO:0009415	response to water	104/1852	347/9983	1.06622e-07	6.78051e-05	6.38169e-05	Seita.1G079000/Seita.1G103700/Seita.1G127700/Seita.1G161800/Seita.1G177700/Seita.1G185100/Seita.1G267200/Seita.1G270500/Seita.1G271000/Seita.1G324300/Seita.1G327600/Seita.2G033500/Seita.2G049100/Seita.2G132500/Seita.2G141900/Seita.2G164500/Seita.2G178900/Seita.2G352700/Seita.2G400600/Seita.2G404700/Seita.2G406500/Seita.2G419200/Seita.2G436000/Seita.3G007200/Seita.3G036300/Seita.3G162400/Seita.3G2…	104		Ci603up	CC	GO:0005844	polysome	17/310	72/9955	4.52958e-11	2.50637e-09	2.1297e-09	Seita.2G267400/Seita.3G280800/Seita.4G177300/Seita.6G017200/Seita.6G085600/Seita.6G112100/Seita.6G224900/Seita.7G099000/Seita.7G166100/Seita.7G228400/Seita.7G290900/Seita.7G314300/Seita.8G046000/Seita.9G044700/Seita.9G131800/Seita.9G502500/Seita.9G517100	17		Ci409DEG	BP	GO:0080167	response to karrikin	31/1114	136/9983	7.30268e-05	0.0201371	0.0196212	Seita.1G057100/Seita.1G057300/Seita.1G253100/Seita.1G332100/Seita.1G346600/Seita.2G053300/Seita.2G053700/Seita.2G053800/Seita.2G081000/Seita.2G435800/Seita.3G108800/Seita.3G170100/Seita.3G219800/Seita.3G406500/Seita.5G056800/Seita.5G236200/Seita.5G386100/Seita.6G007700/Seita.6G193700/Seita.7G046700/Seita.7G079000/Seita.7G168700/Seita.7G183800/Seita.8G013300/Seita.8G020600/Seita.8G228200/Seita.8G2…	31
Ci328DEG	BP	GO:0009636	response to toxic substance	81/1852	252/9983	1.13056e-07	6.78051e-05	6.38169e-05	Seita.1G012200/Seita.1G045200/Seita.1G079000/Seita.1G117500/Seita.1G192100/Seita.1G219700/Seita.1G239600/Seita.2G001400/Seita.2G033500/Seita.2G090300/Seita.2G132500/Seita.2G178900/Seita.2G179700/Seita.2G179800/Seita.2G324100/Seita.2G406500/Seita.3G060800/Seita.3G089400/Seita.3G096900/Seita.3G097200/Seita.3G099600/Seita.3G175700/Seita.3G190400/Seita.3G270300/Seita.3G286500/Seita.4G067200/Seita.4G1…	81		Ci603up	CC	GO:0022626	cytosolic ribosome	25/310	173/9955	1.19656e-10	4.96571e-09	4.21944e-09	Seita.1G214900/Seita.2G048400/Seita.2G267400/Seita.2G362700/Seita.3G162800/Seita.3G280800/Seita.4G023300/Seita.4G177300/Seita.6G017200/Seita.6G085600/Seita.6G112100/Seita.6G224900/Seita.7G064700/Seita.7G099000/Seita.7G166100/Seita.7G228400/Seita.7G234800/Seita.7G290900/Seita.7G314300/Seita.8G046000/Seita.9G044700/Seita.9G131800/Seita.9G502500/Seita.9G517100/Seita.9G544700	25		Ci409DEG	BP	GO:0009644	response to high light intensity	21/1114	80/9983	0.00013002	0.0286824	0.0279475	Seita.1G012200/Seita.1G257600/Seita.2G053300/Seita.2G053700/Seita.2G053800/Seita.2G352900/Seita.3G175700/Seita.4G099200/Seita.4G139900/Seita.4G219400/Seita.5G014300/Seita.5G092400/Seita.5G315500/Seita.6G082000/Seita.7G245800/Seita.7G257400/Seita.9G149700/Seita.9G272800/Seita.9G457400/Seita.9G488400/Seita.9G531900	21
Ci328DEG	BP	GO:0009414	response to water deprivation	101/1852	340/9983	2.62378e-07	0.000125889	0.000118484	Seita.1G079000/Seita.1G103700/Seita.1G127700/Seita.1G161800/Seita.1G177700/Seita.1G185100/Seita.1G267200/Seita.1G270500/Seita.1G271000/Seita.1G324300/Seita.1G327600/Seita.2G033500/Seita.2G049100/Seita.2G132500/Seita.2G141900/Seita.2G164500/Seita.2G178900/Seita.2G352700/Seita.2G400600/Seita.2G404700/Seita.2G406500/Seita.2G419200/Seita.3G007200/Seita.3G036300/Seita.3G162400/Seita.3G237600/Seita.3G2…	101		Ci603up	CC	GO:0005840	ribosome	25/310	215/9955	1.21421e-08	4.03118e-07	3.42535e-07	Seita.1G214900/Seita.2G048400/Seita.2G267400/Seita.2G362700/Seita.3G162800/Seita.3G280800/Seita.4G023300/Seita.4G177300/Seita.6G017200/Seita.6G085600/Seita.6G112100/Seita.6G224900/Seita.7G064700/Seita.7G099000/Seita.7G166100/Seita.7G228400/Seita.7G234800/Seita.7G290900/Seita.7G314300/Seita.8G046000/Seita.9G044700/Seita.9G131800/Seita.9G502500/Seita.9G517100/Seita.9G544700	25		Ci409DEG	BP	GO:0010119	regulation of stomatal movement	21/1114	80/9983	0.00013002	0.0286824	0.0279475	Seita.1G240800/Seita.1G305900/Seita.2G193000/Seita.2G352900/Seita.3G312800/Seita.3G370000/Seita.4G185100/Seita.4G231500/Seita.5G121900/Seita.5G240000/Seita.5G240100/Seita.5G284300/Seita.5G366200/Seita.5G468100/Seita.6G144900/Seita.8G001400/Seita.8G020600/Seita.9G063400/Seita.9G080000/Seita.9G234200/Seita.9G541500	21
Ci328DEG	BP	GO:0048878	chemical homeostasis	97/1852	328/9983	5.69307e-07	0.000227628	0.000214239	Seita.1G002200/Seita.1G019500/Seita.1G130300/Seita.1G155500/Seita.1G166600/Seita.1G169800/Seita.1G230100/Seita.1G231200/Seita.1G256100/Seita.1G263000/Seita.1G274100/Seita.1G278500/Seita.1G281500/Seita.1G333100/Seita.1G373300/Seita.1G379500/Seita.2G090300/Seita.2G159000/Seita.2G197500/Seita.2G229900/Seita.2G264800/Seita.2G277900/Seita.2G309200/Seita.2G372300/Seita.2G413200/Seita.2G426200/Seita.3G0…	97		Ci603up	CC	GO:0022625	cytosolic large ribosomal subunit	15/310	80/9955	1.90967e-08	5.28341e-07	4.48939e-07	Seita.1G214900/Seita.2G267400/Seita.3G162800/Seita.4G177300/Seita.6G017200/Seita.6G085600/Seita.6G112100/Seita.6G224900/Seita.7G064700/Seita.7G166100/Seita.7G228400/Seita.7G290900/Seita.7G314300/Seita.8G046000/Seita.9G544700	15		Ci409DEG	BP	GO:1990748	cellular detoxification	24/1114	98/9983	0.000144766	0.0290322	0.0282883	Seita.1G079000/Seita.1G117500/Seita.1G192100/Seita.1G336800/Seita.1G341200/Seita.2G312300/Seita.3G016700/Seita.4G011900/Seita.4G101400/Seita.5G046600/Seita.5G174100/Seita.5G263000/Seita.5G346500/Seita.5G463500/Seita.6G053800/Seita.6G129100/Seita.7G102200/Seita.7G122100/Seita.7G225300/Seita.7G231200/Seita.7G279700/Seita.9G131200/Seita.9G237000/Seita.9G370000	24
Ci328DEG	BP	GO:0000302	response to reactive oxygen species	63/1852	197/9983	3.47305e-06	0.00114871	0.00108114	Seita.1G012200/Seita.1G045200/Seita.1G117500/Seita.1G192100/Seita.1G210300/Seita.1G219700/Seita.1G257600/Seita.1G281500/Seita.1G335200/Seita.2G077200/Seita.2G156100/Seita.2G179700/Seita.2G179800/Seita.2G219700/Seita.2G280700/Seita.2G335300/Seita.2G441700/Seita.3G060800/Seita.3G175700/Seita.3G286500/Seita.3G368800/Seita.4G067200/Seita.4G111400/Seita.5G047800/Seita.5G092400/Seita.5G207000/Seita.5G2…	63		Ci603up	CC	GO:0015934	large ribosomal subunit	15/310	93/9955	1.55904e-07	3.69715e-06	3.14152e-06	Seita.1G214900/Seita.2G267400/Seita.3G162800/Seita.4G177300/Seita.6G017200/Seita.6G085600/Seita.6G112100/Seita.6G224900/Seita.7G064700/Seita.7G166100/Seita.7G228400/Seita.7G290900/Seita.7G314300/Seita.8G046000/Seita.9G544700	15		Ci409DEG	BP	GO:0009409	response to cold	64/1114	368/9983	0.000180515	0.0331846	0.0323343	Seita.1G012400/Seita.1G042400/Seita.1G079000/Seita.1G106900/Seita.1G117500/Seita.1G125900/Seita.1G141800/Seita.1G192100/Seita.1G257600/Seita.1G267200/Seita.1G275700/Seita.1G307900/Seita.1G308900/Seita.1G321900/Seita.1G324300/Seita.1G341200/Seita.1G362000/Seita.2G053300/Seita.2G053700/Seita.2G053800/Seita.2G142500/Seita.2G180200/Seita.2G185400/Seita.2G248500/Seita.2G352700/Seita.2G401700/Seita.3G0…	64
Ci328DEG	BP	GO:0044550	secondary metabolite biosynthetic process	68/1852	218/9983	3.83062e-06	0.00114871	0.00108114	Seita.1G019400/Seita.1G062400/Seita.1G064100/Seita.1G219200/Seita.1G230100/Seita.1G253000/Seita.1G281500/Seita.2G107500/Seita.2G132800/Seita.2G145700/Seita.2G145800/Seita.2G145900/Seita.2G219700/Seita.2G278500/Seita.2G283800/Seita.3G142500/Seita.3G186600/Seita.3G189100/Seita.3G218600/Seita.3G282000/Seita.3G298400/Seita.3G339800/Seita.4G021600/Seita.4G191500/Seita.4G216300/Seita.4G235500/Seita.4G2…	68		Ci603up	CC	GO:1990904	ribonucleoprotein complex	38/310	493/9955	1.89256e-07	3.92706e-06	3.33688e-06	Seita.1G203200/Seita.1G214900/Seita.1G215500/Seita.2G048400/Seita.2G267400/Seita.2G362700/Seita.2G381700/Seita.2G404800/Seita.3G162800/Seita.3G280800/Seita.4G023300/Seita.4G122000/Seita.4G177300/Seita.6G017200/Seita.6G068900/Seita.6G085600/Seita.6G112100/Seita.6G224900/Seita.7G064700/Seita.7G099000/Seita.7G166100/Seita.7G228400/Seita.7G234800/Seita.7G290900/Seita.7G314300/Seita.8G046000/Seita.8G1…	38		Ci409DEG	BP	GO:0098869	cellular oxidant detoxification	23/1114	95/9983	0.000237134	0.0370731	0.0361231	Seita.1G079000/Seita.1G117500/Seita.1G192100/Seita.1G336800/Seita.1G341200/Seita.2G312300/Seita.3G016700/Seita.4G011900/Seita.4G101400/Seita.5G046600/Seita.5G174100/Seita.5G263000/Seita.5G346500/Seita.5G463500/Seita.6G053800/Seita.6G129100/Seita.7G102200/Seita.7G225300/Seita.7G231200/Seita.7G279700/Seita.9G131200/Seita.9G237000/Seita.9G370000	23
Ci328DEG	BP	GO:0042446	hormone biosynthetic process	63/1852	200/9983	6.0514e-06	0.00153308	0.00144291	Seita.1G021400/Seita.1G275400/Seita.1G335200/Seita.1G345400/Seita.1G371900/Seita.2G000900/Seita.2G104900/Seita.2G144900/Seita.2G201000/Seita.2G229900/Seita.2G231300/Seita.2G390100/Seita.2G436000/Seita.3G116300/Seita.3G156200/Seita.4G078000/Seita.4G078100/Seita.4G078200/Seita.4G101100/Seita.4G110900/Seita.4G235500/Seita.4G235600/Seita.4G288100/Seita.5G044300/Seita.5G069100/Seita.5G139200/Seita.5G2…	63		Ci603up	CC	GO:0022627	cytosolic small ribosomal subunit	10/310	47/9955	1.38066e-06	2.54654e-05	2.16384e-05	Seita.2G048400/Seita.2G362700/Seita.3G280800/Seita.4G023300/Seita.7G099000/Seita.7G234800/Seita.9G044700/Seita.9G131800/Seita.9G502500/Seita.9G517100	10		Ci409DEG	BP	GO:0046148	pigment biosynthetic process	28/1114	126/9983	0.000252811	0.0370731	0.0361231	Seita.1G057100/Seita.1G231800/Seita.1G332100/Seita.2G053300/Seita.2G053700/Seita.2G053800/Seita.2G202100/Seita.2G223900/Seita.2G252100/Seita.2G303000/Seita.3G031400/Seita.3G402300/Seita.4G022100/Seita.4G156200/Seita.4G288600/Seita.5G040100/Seita.5G258300/Seita.5G365700/Seita.6G159400/Seita.7G079000/Seita.7G116800/Seita.7G157900/Seita.7G290300/Seita.8G104100/Seita.9G201900/Seita.9G204500/Seita.9G4…	28
Ci328DEG	BP	GO:0006979	response to oxidative stress	105/1852	380/9983	6.39051e-06	0.00153308	0.00144291	Seita.1G012200/Seita.1G045200/Seita.1G117500/Seita.1G192100/Seita.1G209700/Seita.1G210300/Seita.1G219700/Seita.1G257600/Seita.1G263400/Seita.1G272900/Seita.1G281500/Seita.1G323700/Seita.1G335200/Seita.1G364500/Seita.2G013400/Seita.2G033500/Seita.2G077200/Seita.2G081000/Seita.2G156100/Seita.2G178900/Seita.2G179700/Seita.2G179800/Seita.2G188200/Seita.2G219700/Seita.2G280700/Seita.2G335300/Seita.2G3…	105		Ci603up	CC	GO:0005730	nucleolus	30/310	436/9955	3.68502e-05	0.000611714	0.000519782	Seita.1G210300/Seita.1G214900/Seita.2G048400/Seita.2G267400/Seita.2G278900/Seita.2G362700/Seita.2G385500/Seita.2G404800/Seita.4G122000/Seita.4G159500/Seita.4G177300/Seita.5G158800/Seita.6G068900/Seita.6G112100/Seita.6G123500/Seita.6G154500/Seita.6G224900/Seita.7G064700/Seita.7G166100/Seita.7G290900/Seita.7G314300/Seita.8G046000/Seita.8G161700/Seita.9G044700/Seita.9G057400/Seita.9G128300/Seita.9G4…	30		Ci409DEG	BP	GO:0009637	response to blue light	20/1114	78/9983	0.000263003	0.0370731	0.0361231	Seita.1G067400/Seita.1G203400/Seita.1G289600/Seita.1G306100/Seita.2G053300/Seita.2G053700/Seita.2G053800/Seita.2G166700/Seita.2G193200/Seita.2G217800/Seita.2G262300/Seita.2G351600/Seita.3G140700/Seita.4G139900/Seita.5G251200/Seita.7G018400/Seita.7G029100/Seita.7G258700/Seita.8G001400/Seita.8G080900	20
Ci328DEG	BP	GO:0032787	monocarboxylic acid metabolic process	112/1852	412/9983	7.1694e-06	0.00156358	0.00147161	Seita.1G069500/Seita.1G103700/Seita.1G106400/Seita.1G122400/Seita.1G195100/Seita.1G219200/Seita.1G265100/Seita.1G304800/Seita.1G354800/Seita.1G371900/Seita.2G104900/Seita.2G151800/Seita.2G187800/Seita.2G187900/Seita.2G190100/Seita.2G290900/Seita.2G300900/Seita.2G360500/Seita.2G389400/Seita.2G400600/Seita.3G015800/Seita.3G020300/Seita.3G051400/Seita.3G056400/Seita.3G096900/Seita.3G097200/Seita.3G1…	112		Ci603up	CC	GO:0005732	small nucleolar ribonucleoprotein complex	6/310	22/9955	4.25126e-05	0.000641553	0.000545137	Seita.2G404800/Seita.4G122000/Seita.8G161700/Seita.9G057400/Seita.9G404600/Seita.9G404700	6		Ci409DEG	BP	GO:0019740	nitrogen utilization	6/1114	10/9983	0.000268889	0.0370731	0.0361231	Seita.2G418200/Seita.3G153400/Seita.3G350700/Seita.6G224800/Seita.7G076400/Seita.9G174400	6
Ci328DEG	BP	GO:0009753	response to jasmonic acid	65/1852	211/9983	9.83595e-06	0.00196637	0.00185071	Seita.1G219700/Seita.1G275400/Seita.1G281500/Seita.1G309100/Seita.1G315600/Seita.1G324800/Seita.2G034500/Seita.2G132500/Seita.2G145800/Seita.2G145900/Seita.2G156200/Seita.2G200400/Seita.2G217500/Seita.2G278500/Seita.2G388400/Seita.2G400600/Seita.2G430400/Seita.3G060800/Seita.3G062400/Seita.3G146500/Seita.3G232500/Seita.3G287100/Seita.3G379400/Seita.4G083000/Seita.4G091600/Seita.4G105900/Seita.4G1…	65		Ci603up	CC	GO:0015935	small ribosomal subunit	10/310	70/9955	5.60949e-05	0.00077598	0.000659361	Seita.2G048400/Seita.2G362700/Seita.3G280800/Seita.4G023300/Seita.7G099000/Seita.7G234800/Seita.9G044700/Seita.9G131800/Seita.9G502500/Seita.9G517100	10		Ci409DEG	BP	GO:0044264	cellular polysaccharide metabolic process	42/1114	220/9983	0.000321567	0.041728	0.0406588	Seita.1G080900/Seita.1G325200/Seita.2G112500/Seita.2G168000/Seita.2G191400/Seita.2G415500/Seita.2G422000/Seita.2G443600/Seita.3G003000/Seita.3G098900/Seita.3G133300/Seita.3G217800/Seita.3G219800/Seita.3G227500/Seita.3G235400/Seita.3G275400/Seita.3G332200/Seita.4G099300/Seita.4G103800/Seita.4G271600/Seita.5G295100/Seita.5G316000/Seita.5G384100/Seita.6G120500/Seita.6G128700/Seita.6G202800/Seita.7G0…	42
Ci328DEG	BP	GO:0042445	hormone metabolic process	83/1852	288/9983	1.10727e-05	0.00204334	0.00192316	Seita.1G021400/Seita.1G166600/Seita.1G275400/Seita.1G335200/Seita.1G345400/Seita.1G371900/Seita.1G373300/Seita.2G000900/Seita.2G098500/Seita.2G104900/Seita.2G144900/Seita.2G201000/Seita.2G229900/Seita.2G231300/Seita.2G372300/Seita.2G390100/Seita.2G413200/Seita.2G436000/Seita.3G116300/Seita.3G147000/Seita.3G150700/Seita.3G156200/Seita.3G170100/Seita.4G015700/Seita.4G078000/Seita.4G078100/Seita.4G0…	83		Ci603up	CC	GO:0009579	thylakoid	24/310	359/9955	0.000346315	0.00442217	0.00375759	Seita.1G053900/Seita.1G208500/Seita.1G323900/Seita.1G324300/Seita.2G035400/Seita.2G046600/Seita.2G217800/Seita.3G144000/Seita.3G203200/Seita.3G224900/Seita.4G148000/Seita.4G210300/Seita.5G067400/Seita.5G099500/Seita.6G103300/Seita.6G113700/Seita.6G128600/Seita.6G151500/Seita.6G188600/Seita.7G121500/Seita.7G171400/Seita.7G183200/Seita.8G161700/Seita.9G093400	24		Ci409DEG	BP	GO:0005975	carbohydrate metabolic process	77/1114	474/9983	0.000388256	0.0475829	0.0463636	Seita.1G080900/Seita.1G294300/Seita.1G314700/Seita.1G325200/Seita.2G051000/Seita.2G081000/Seita.2G112500/Seita.2G168000/Seita.2G188200/Seita.2G191400/Seita.2G262300/Seita.2G263800/Seita.2G288000/Seita.2G351400/Seita.2G415500/Seita.2G422000/Seita.2G443600/Seita.3G003000/Seita.3G011800/Seita.3G098900/Seita.3G111200/Seita.3G133300/Seita.3G217800/Seita.3G219800/Seita.3G227500/Seita.3G235400/Seita.3G2…	77
Ci328DEG	BP	GO:0072330	monocarboxylic acid biosynthetic process	66/1852	218/9983	1.58123e-05	0.00270955	0.00255017	Seita.1G106400/Seita.1G195100/Seita.1G219200/Seita.1G304800/Seita.1G371900/Seita.2G104900/Seita.2G190100/Seita.2G290900/Seita.2G300900/Seita.2G389400/Seita.2G400600/Seita.3G015800/Seita.3G020300/Seita.3G109600/Seita.3G111200/Seita.3G346000/Seita.3G391300/Seita.4G021600/Seita.4G078000/Seita.4G078100/Seita.4G078200/Seita.4G110900/Seita.4G169900/Seita.4G190800/Seita.4G267900/Seita.5G014400/Seita.5G1…	66		Ci603up	MF	GO:0003735	structural constituent of ribosome	25/273	182/8539	5.69933e-10	1.88078e-07	1.84178e-07	Seita.1G214900/Seita.2G048400/Seita.2G267400/Seita.2G362700/Seita.3G162800/Seita.3G280800/Seita.4G023300/Seita.4G177300/Seita.6G017200/Seita.6G085600/Seita.6G112100/Seita.6G224900/Seita.7G064700/Seita.7G099000/Seita.7G166100/Seita.7G228400/Seita.7G234800/Seita.7G290900/Seita.7G314300/Seita.8G046000/Seita.9G044700/Seita.9G131800/Seita.9G502500/Seita.9G517100/Seita.9G544700	25		Ci409DEG	CC	GO:0009579	thylakoid	131/1107	359/9955	3.05795e-38	8.95981e-36	8.59446e-36	Seita.1G003200/Seita.1G008600/Seita.1G013300/Seita.1G053900/Seita.1G112900/Seita.1G118300/Seita.1G125900/Seita.1G192100/Seita.1G208500/Seita.1G221300/Seita.1G251800/Seita.1G303800/Seita.1G305900/Seita.1G317800/Seita.1G321900/Seita.1G322800/Seita.1G324300/Seita.1G341200/Seita.1G364200/Seita.2G035400/Seita.2G036900/Seita.2G051000/Seita.2G053300/Seita.2G053700/Seita.2G053800/Seita.2G066600/Seita.2G1…	131
Ci328DEG	BP	GO:0071554	cell wall organization or biogenesis	109/1852	409/9983	2.43662e-05	0.00386102	0.00363392	Seita.1G079000/Seita.1G080900/Seita.1G112800/Seita.1G123400/Seita.1G123500/Seita.1G213900/Seita.1G268900/Seita.1G281500/Seita.1G294300/Seita.1G309600/Seita.1G316700/Seita.2G044900/Seita.2G072100/Seita.2G080900/Seita.2G199800/Seita.2G209100/Seita.2G313800/Seita.2G368200/Seita.2G382900/Seita.2G414200/Seita.3G046000/Seita.3G096400/Seita.3G132100/Seita.3G158500/Seita.3G190400/Seita.3G270300/Seita.3G2…	109		Ci603up	MF	GO:0005198	structural molecule activity	26/273	250/8539	9.65581e-08	1.59321e-05	1.56018e-05	Seita.1G214900/Seita.1G267900/Seita.2G048400/Seita.2G267400/Seita.2G362700/Seita.3G162800/Seita.3G280800/Seita.4G023300/Seita.4G177300/Seita.6G017200/Seita.6G085600/Seita.6G112100/Seita.6G224900/Seita.7G064700/Seita.7G099000/Seita.7G166100/Seita.7G228400/Seita.7G234800/Seita.7G290900/Seita.7G314300/Seita.8G046000/Seita.9G044700/Seita.9G131800/Seita.9G502500/Seita.9G517100/Seita.9G544700	26		Ci409DEG	CC	GO:0055035	plastid thylakoid membrane	100/1107	233/9955	2.94632e-36	4.31635e-34	4.14035e-34	Seita.1G003200/Seita.1G008600/Seita.1G013300/Seita.1G118300/Seita.1G192100/Seita.1G208500/Seita.1G251800/Seita.1G303800/Seita.1G305900/Seita.1G317800/Seita.1G321900/Seita.1G322800/Seita.1G341200/Seita.2G035400/Seita.2G051000/Seita.2G053300/Seita.2G053700/Seita.2G053800/Seita.2G066600/Seita.2G163700/Seita.2G166700/Seita.2G193700/Seita.2G202200/Seita.2G217800/Seita.2G236000/Seita.2G248100/Seita.2G2…	100
Ci328DEG	BP	GO:0055088	lipid homeostasis	23/1852	53/9983	2.57508e-05	0.00386102	0.00363392	Seita.1G166600/Seita.1G373300/Seita.2G229900/Seita.2G277900/Seita.2G413200/Seita.3G116300/Seita.3G243800/Seita.4G194200/Seita.4G224700/Seita.5G139200/Seita.5G232500/Seita.6G001600/Seita.6G089500/Seita.7G132100/Seita.7G204200/Seita.7G318000/Seita.8G027000/Seita.8G041200/Seita.8G166500/Seita.9G021400/Seita.9G205600/Seita.9G205700/Seita.9G205800	23		Ci603up	MF	GO:0003729	mRNA binding	21/273	276/8539	0.000196305	0.0215936	0.0211459	Seita.1G203200/Seita.1G214900/Seita.2G048400/Seita.2G381700/Seita.3G280800/Seita.3G357800/Seita.4G191000/Seita.6G017200/Seita.7G037000/Seita.7G046200/Seita.7G064700/Seita.7G099000/Seita.7G166100/Seita.7G228400/Seita.7G290900/Seita.8G046000/Seita.9G044700/Seita.9G183600/Seita.9G380500/Seita.9G502500/Seita.9G517100	21		Ci409DEG	CC	GO:0009535	chloroplast thylakoid membrane	98/1107	227/9955	8.36477e-36	8.16959e-34	7.83647e-34	Seita.1G003200/Seita.1G008600/Seita.1G013300/Seita.1G118300/Seita.1G192100/Seita.1G208500/Seita.1G251800/Seita.1G303800/Seita.1G305900/Seita.1G317800/Seita.1G321900/Seita.1G322800/Seita.1G341200/Seita.2G035400/Seita.2G051000/Seita.2G053300/Seita.2G053700/Seita.2G053800/Seita.2G066600/Seita.2G163700/Seita.2G166700/Seita.2G202200/Seita.2G217800/Seita.2G236000/Seita.2G248100/Seita.2G283000/Seita.2G3…	98
Ci328DEG	BP	GO:0050801	ion homeostasis	64/1852	214/9983	3.22392e-05	0.00451333	0.00424786	Seita.1G002200/Seita.1G019500/Seita.1G130300/Seita.1G169800/Seita.1G231200/Seita.1G256100/Seita.1G263000/Seita.1G274100/Seita.1G278500/Seita.1G281500/Seita.1G333100/Seita.1G379500/Seita.2G090300/Seita.2G159000/Seita.2G197500/Seita.2G277900/Seita.2G309200/Seita.2G372300/Seita.2G426200/Seita.3G030500/Seita.3G049900/Seita.3G051000/Seita.3G101400/Seita.3G150400/Seita.3G166700/Seita.3G193100/Seita.3G2…	64		Ci603up	MF	GO:0030515	snoRNA binding	5/273	22/8539	0.000542149	0.0447273	0.0437999	Seita.4G122000/Seita.8G161700/Seita.9G057400/Seita.9G404600/Seita.9G404700	5		Ci409DEG	CC	GO:0031976	plastid thylakoid	113/1107	297/9955	5.9476e-35	4.25087e-33	4.07753e-33	Seita.1G003200/Seita.1G008600/Seita.1G013300/Seita.1G118300/Seita.1G192100/Seita.1G208500/Seita.1G221300/Seita.1G251800/Seita.1G303800/Seita.1G305900/Seita.1G317800/Seita.1G321900/Seita.1G322800/Seita.1G341200/Seita.2G035400/Seita.2G051000/Seita.2G053300/Seita.2G053700/Seita.2G053800/Seita.2G066600/Seita.2G163700/Seita.2G166700/Seita.2G193700/Seita.2G202200/Seita.2G217800/Seita.2G236000/Seita.2G2…	113
Ci328DEG	BP	GO:0071669	plant-type cell wall organization or biogenesis	74/1852	257/9983	3.38641e-05	0.00451333	0.00424786	Seita.1G079000/Seita.1G080900/Seita.1G123400/Seita.1G123500/Seita.1G213900/Seita.1G268900/Seita.1G281500/Seita.1G309600/Seita.1G316700/Seita.2G044900/Seita.2G080900/Seita.2G199800/Seita.2G209100/Seita.2G368200/Seita.2G382900/Seita.3G046000/Seita.3G096400/Seita.3G132100/Seita.3G158500/Seita.3G190400/Seita.3G270300/Seita.3G337900/Seita.4G008800/Seita.4G115200/Seita.4G213700/Seita.4G223900/Seita.4G2…	74		Ci328up	BP	GO:0009642	response to light intensity	16/258	127/9983	1.56382e-07	0.000103223	9.8291e-05	Seita.1G012200/Seita.2G046600/Seita.2G053800/Seita.2G164500/Seita.2G335600/Seita.3G158600/Seita.3G175700/Seita.5G092400/Seita.5G207000/Seita.7G087700/Seita.7G257400/Seita.7G280800/Seita.9G424800/Seita.9G457400/Seita.9G470600/Seita.9G488400	16		Ci409DEG	CC	GO:0009534	chloroplast thylakoid	112/1107	293/9955	7.25404e-35	4.25087e-33	4.07753e-33	Seita.1G003200/Seita.1G008600/Seita.1G013300/Seita.1G118300/Seita.1G192100/Seita.1G208500/Seita.1G221300/Seita.1G251800/Seita.1G303800/Seita.1G305900/Seita.1G317800/Seita.1G321900/Seita.1G322800/Seita.1G341200/Seita.2G035400/Seita.2G051000/Seita.2G053300/Seita.2G053700/Seita.2G053800/Seita.2G066600/Seita.2G163700/Seita.2G166700/Seita.2G193700/Seita.2G202200/Seita.2G217800/Seita.2G236000/Seita.2G2…	112
Ci328DEG	BP	GO:0055082	cellular chemical homeostasis	47/1852	145/9983	4.00738e-05	0.00482813	0.00454414	Seita.1G130300/Seita.1G169800/Seita.1G231200/Seita.1G274100/Seita.1G379500/Seita.2G159000/Seita.2G197500/Seita.2G426200/Seita.3G030500/Seita.3G049900/Seita.3G051000/Seita.3G109600/Seita.3G166700/Seita.3G215300/Seita.3G333100/Seita.4G138500/Seita.4G159500/Seita.4G175000/Seita.5G085100/Seita.5G103100/Seita.5G124100/Seita.5G134800/Seita.5G232500/Seita.5G270400/Seita.5G311400/Seita.5G313600/Seita.5G3…	47		Ci328up	BP	GO:0000302	response to reactive oxygen species	20/258	197/9983	1.66893e-07	0.000103223	9.8291e-05	Seita.1G012200/Seita.1G192100/Seita.1G209000/Seita.1G335200/Seita.3G175700/Seita.3G192300/Seita.4G111400/Seita.5G092400/Seita.5G207000/Seita.5G421200/Seita.7G101100/Seita.7G102200/Seita.7G126300/Seita.8G173800/Seita.8G222300/Seita.9G198800/Seita.9G424800/Seita.9G470600/Seita.9G488400/Seita.9G552800	20		Ci409DEG	CC	GO:0034357	photosynthetic membrane	100/1107	244/9955	3.49314e-34	1.46213e-32	1.40251e-32	Seita.1G003200/Seita.1G008600/Seita.1G013300/Seita.1G118300/Seita.1G192100/Seita.1G208500/Seita.1G251800/Seita.1G303800/Seita.1G305900/Seita.1G317800/Seita.1G321900/Seita.1G322800/Seita.1G341200/Seita.2G035400/Seita.2G051000/Seita.2G053300/Seita.2G053700/Seita.2G053800/Seita.2G066600/Seita.2G163700/Seita.2G166700/Seita.2G193700/Seita.2G202200/Seita.2G217800/Seita.2G236000/Seita.2G248100/Seita.2G2…	100
Ci328DEG	BP	GO:0055065	metal ion homeostasis	46/1852	141/9983	4.02512e-05	0.00482813	0.00454414	Seita.1G002200/Seita.1G019500/Seita.1G130300/Seita.1G169800/Seita.1G231200/Seita.1G274100/Seita.1G278500/Seita.1G281500/Seita.1G379500/Seita.2G090300/Seita.2G159000/Seita.2G197500/Seita.2G309200/Seita.2G372300/Seita.2G426200/Seita.3G030500/Seita.3G049900/Seita.3G051000/Seita.3G101400/Seita.3G166700/Seita.3G215300/Seita.3G375800/Seita.4G138500/Seita.4G175000/Seita.5G085100/Seita.5G103100/Seita.5G2…	46		Ci328up	BP	GO:0009415	response to water	27/258	347/9983	2.89543e-07	0.000119388	0.000113684	Seita.1G331600/Seita.2G142500/Seita.2G164500/Seita.2G241600/Seita.2G284000/Seita.2G406500/Seita.3G144000/Seita.3G157100/Seita.3G193800/Seita.3G369800/Seita.5G119800/Seita.5G166300/Seita.5G393800/Seita.7G039900/Seita.7G184600/Seita.7G228200/Seita.8G008100/Seita.8G115200/Seita.8G115400/Seita.8G125500/Seita.9G039200/Seita.9G198800/Seita.9G229700/Seita.9G410800/Seita.9G424800/Seita.9G510100/Seita.9G5…	27		Ci409DEG	CC	GO:0042651	thylakoid membrane	100/1107	244/9955	3.49314e-34	1.46213e-32	1.40251e-32	Seita.1G003200/Seita.1G008600/Seita.1G013300/Seita.1G118300/Seita.1G192100/Seita.1G208500/Seita.1G251800/Seita.1G303800/Seita.1G305900/Seita.1G317800/Seita.1G321900/Seita.1G322800/Seita.1G341200/Seita.2G035400/Seita.2G051000/Seita.2G053300/Seita.2G053700/Seita.2G053800/Seita.2G066600/Seita.2G163700/Seita.2G166700/Seita.2G193700/Seita.2G202200/Seita.2G217800/Seita.2G236000/Seita.2G248100/Seita.2G2…	100
Ci328DEG	BP	GO:0044262	cellular carbohydrate metabolic process	88/1852	322/9983	5.52846e-05	0.00607647	0.00571906	Seita.1G080900/Seita.1G112800/Seita.1G123400/Seita.1G123500/Seita.1G213900/Seita.1G244200/Seita.1G262000/Seita.1G268900/Seita.1G323700/Seita.2G080900/Seita.2G168000/Seita.2G187800/Seita.2G187900/Seita.2G188200/Seita.2G209100/Seita.2G237100/Seita.2G396200/Seita.3G046000/Seita.3G096400/Seita.3G109600/Seita.3G111200/Seita.3G132100/Seita.3G133300/Seita.3G158500/Seita.3G165800/Seita.3G186600/Seita.3G2…	88		Ci328up	BP	GO:0006979	response to oxidative stress	28/258	380/9983	5.26288e-07	0.000139262	0.000132608	Seita.1G012200/Seita.1G044800/Seita.1G192100/Seita.1G209000/Seita.1G272900/Seita.1G335200/Seita.3G099600/Seita.3G175700/Seita.3G192300/Seita.4G111400/Seita.5G092400/Seita.5G119800/Seita.5G207000/Seita.5G421200/Seita.7G101100/Seita.7G102200/Seita.7G126300/Seita.8G173800/Seita.8G222300/Seita.8G228200/Seita.9G077800/Seita.9G198800/Seita.9G381600/Seita.9G424800/Seita.9G470600/Seita.9G488400/Seita.9G5…	28		Ci409DEG	CC	GO:0009526	plastid envelope	113/1107	451/9955	1.20142e-17	4.40019e-16	4.22077e-16	Seita.1G007200/Seita.1G008600/Seita.1G012400/Seita.1G013300/Seita.1G053900/Seita.1G057500/Seita.1G093900/Seita.1G125900/Seita.1G177800/Seita.1G216200/Seita.1G221300/Seita.1G256000/Seita.1G265400/Seita.1G272900/Seita.1G321900/Seita.1G324700/Seita.1G341200/Seita.1G348100/Seita.1G380300/Seita.2G031800/Seita.2G051000/Seita.2G088200/Seita.2G141700/Seita.2G151800/Seita.2G166700/Seita.2G193700/Seita.2G2…	113
Ci328DEG	BP	GO:0010268	brassinosteroid homeostasis	14/1852	26/9983	5.57242e-05	0.00607647	0.00571906	Seita.1G166600/Seita.1G373300/Seita.2G229900/Seita.2G413200/Seita.3G116300/Seita.4G224700/Seita.5G139200/Seita.6G089500/Seita.7G132100/Seita.7G204200/Seita.7G318000/Seita.8G027000/Seita.8G166500/Seita.9G021400	14		Ci328up	BP	GO:0009636	response to toxic substance	22/258	252/9983	5.62901e-07	0.000139262	0.000132608	Seita.1G012200/Seita.1G192100/Seita.1G209000/Seita.2G406500/Seita.3G099600/Seita.3G175700/Seita.3G192300/Seita.5G092400/Seita.5G207000/Seita.5G333100/Seita.5G346500/Seita.5G421200/Seita.7G101100/Seita.7G102200/Seita.7G167900/Seita.8G153700/Seita.8G222300/Seita.9G077800/Seita.9G424800/Seita.9G470600/Seita.9G488400/Seita.9G552800	22		Ci409DEG	CC	GO:0009941	chloroplast envelope	109/1107	430/9955	1.91956e-17	6.24924e-16	5.99442e-16	Seita.1G007200/Seita.1G012400/Seita.1G013300/Seita.1G053900/Seita.1G057500/Seita.1G093900/Seita.1G177800/Seita.1G216200/Seita.1G221300/Seita.1G256000/Seita.1G272900/Seita.1G321900/Seita.1G324700/Seita.1G341200/Seita.1G348100/Seita.1G380300/Seita.2G031800/Seita.2G051000/Seita.2G088200/Seita.2G141700/Seita.2G151800/Seita.2G166700/Seita.2G193700/Seita.2G217800/Seita.2G248100/Seita.2G252100/Seita.2G2…	109
Ci328DEG	BP	GO:0016051	carbohydrate biosynthetic process	65/1852	223/9983	6.68461e-05	0.00697234	0.00656224	Seita.1G080900/Seita.1G112000/Seita.1G123400/Seita.1G123500/Seita.1G127500/Seita.1G244200/Seita.1G262000/Seita.1G268900/Seita.1G294300/Seita.1G314700/Seita.1G323700/Seita.2G080900/Seita.2G168000/Seita.2G188200/Seita.2G209100/Seita.2G290900/Seita.2G396200/Seita.3G011800/Seita.3G046000/Seita.3G096400/Seita.3G132100/Seita.3G133300/Seita.3G158500/Seita.3G186600/Seita.3G227500/Seita.3G346000/Seita.4G0…	65		Ci328up	BP	GO:0009414	response to water deprivation	26/258	340/9983	6.80735e-07	0.000140345	0.000133639	Seita.1G331600/Seita.2G142500/Seita.2G164500/Seita.2G241600/Seita.2G284000/Seita.2G406500/Seita.3G144000/Seita.3G157100/Seita.3G193800/Seita.3G369800/Seita.5G119800/Seita.5G166300/Seita.5G393800/Seita.7G039900/Seita.7G184600/Seita.7G228200/Seita.8G115200/Seita.8G115400/Seita.8G125500/Seita.9G039200/Seita.9G198800/Seita.9G229700/Seita.9G410800/Seita.9G424800/Seita.9G510100/Seita.9G544600	26		Ci409DEG	CC	GO:0031977	thylakoid lumen	22/1107	49/9955	2.17829e-09	6.38238e-08	6.12213e-08	Seita.1G112900/Seita.1G125900/Seita.1G208500/Seita.1G364200/Seita.2G318800/Seita.2G343000/Seita.2G355000/Seita.3G249600/Seita.3G333700/Seita.5G099500/Seita.6G127500/Seita.6G176000/Seita.6G208100/Seita.6G230800/Seita.7G037600/Seita.7G040700/Seita.7G067200/Seita.7G225300/Seita.7G245800/Seita.9G069300/Seita.9G561800/Seita.J002400	22
Ci328DEG	BP	GO:0080167	response to karrikin	44/1852	136/9983	7.33452e-05	0.00733147	0.00690024	Seita.1G057100/Seita.1G115700/Seita.1G115800/Seita.1G225000/Seita.1G253100/Seita.2G033500/Seita.2G081000/Seita.2G178900/Seita.2G335600/Seita.2G400600/Seita.3G108800/Seita.3G155100/Seita.3G170100/Seita.4G213300/Seita.4G276400/Seita.4G277900/Seita.5G274700/Seita.5G356600/Seita.5G356800/Seita.5G399300/Seita.5G446300/Seita.6G007700/Seita.6G007800/Seita.6G118900/Seita.6G153400/Seita.6G166300/Seita.7G0…	44		Ci328up	BP	GO:0009644	response to high light intensity	12/258	80/9983	8.69541e-07	0.00015366	0.000146318	Seita.1G012200/Seita.2G046600/Seita.2G053800/Seita.2G164500/Seita.3G175700/Seita.5G092400/Seita.5G207000/Seita.7G257400/Seita.9G424800/Seita.9G457400/Seita.9G470600/Seita.9G488400	12		Ci409DEG	CC	GO:0010598	NAD(P)H dehydrogenase complex (plastoquinone)	9/1107	12/9955	4.06067e-07	1.08162e-05	1.03751e-05	Seita.1G317800/Seita.2G202200/Seita.3G359500/Seita.5G404400/Seita.5G460600/Seita.6G103300/Seita.7G183200/Seita.9G294600/Seita.9G534200	9
Ci328DEG	BP	GO:0016131	brassinosteroid metabolic process	15/1852	30/9983	9.29687e-05	0.00892128	0.00839654	Seita.1G166600/Seita.1G373300/Seita.2G229900/Seita.2G231300/Seita.2G413200/Seita.3G116300/Seita.4G224700/Seita.5G139200/Seita.6G089500/Seita.7G132100/Seita.7G204200/Seita.7G318000/Seita.8G027000/Seita.8G166500/Seita.9G021400	15		Ci328up	BP	GO:0042542	response to hydrogen peroxide	12/258	85/9983	1.69318e-06	0.000261808	0.000249298	Seita.1G012200/Seita.1G209000/Seita.3G175700/Seita.3G192300/Seita.5G092400/Seita.5G207000/Seita.5G421200/Seita.7G101100/Seita.8G222300/Seita.9G424800/Seita.9G470600/Seita.9G488400	12		Ci409DEG	CC	GO:0048046	apoplast	46/1107	226/9955	3.1086e-05	0.000714409	0.000685278	Seita.1G061800/Seita.1G170500/Seita.1G245800/Seita.1G324300/Seita.1G341200/Seita.2G044900/Seita.2G168000/Seita.2G223900/Seita.2G288000/Seita.2G343000/Seita.2G418200/Seita.3G010200/Seita.3G263800/Seita.3G315000/Seita.3G397200/Seita.4G025700/Seita.4G075600/Seita.4G191200/Seita.4G245500/Seita.5G014300/Seita.5G064500/Seita.5G240000/Seita.5G240100/Seita.5G246700/Seita.5G291800/Seita.5G448000/Seita.5G4…	46
Ci328DEG	BP	GO:0010817	regulation of hormone levels	102/1852	390/9983	9.85399e-05	0.0090922	0.00855741	Seita.1G021400/Seita.1G166600/Seita.1G275400/Seita.1G335200/Seita.1G345400/Seita.1G371900/Seita.1G373300/Seita.2G000900/Seita.2G098500/Seita.2G104900/Seita.2G144900/Seita.2G201000/Seita.2G221700/Seita.2G229900/Seita.2G231300/Seita.2G264800/Seita.2G294500/Seita.2G372300/Seita.2G390100/Seita.2G413200/Seita.2G436000/Seita.3G116300/Seita.3G147000/Seita.3G150700/Seita.3G156200/Seita.3G170100/Seita.4G0…	102		Ci328up	BP	GO:0009408	response to heat	18/258	199/9983	3.77434e-06	0.000518763	0.000493976	Seita.1G012200/Seita.1G162500/Seita.1G326600/Seita.1G342400/Seita.2G053800/Seita.2G241600/Seita.3G175700/Seita.4G111400/Seita.4G267900/Seita.5G092400/Seita.5G093000/Seita.5G131400/Seita.5G207000/Seita.7G060200/Seita.9G278500/Seita.9G424800/Seita.9G470600/Seita.9G488400	18		Ci409DEG	CC	GO:0046658	anchored component of plasma membrane	29/1107	119/9955	3.16973e-05	0.000714409	0.000685278	Seita.1G322500/Seita.2G044900/Seita.2G154700/Seita.2G199400/Seita.2G199500/Seita.3G146800/Seita.3G182000/Seita.3G225200/Seita.3G263800/Seita.3G315000/Seita.4G084200/Seita.5G311700/Seita.5G328200/Seita.5G390300/Seita.5G448000/Seita.5G448400/Seita.6G201700/Seita.6G202800/Seita.6G224400/Seita.8G079300/Seita.9G060800/Seita.9G088400/Seita.9G112400/Seita.9G150500/Seita.9G233400/Seita.9G373900/Seita.9G4…	29
Ci328DEG	BP	GO:0006873	cellular ion homeostasis	40/1852	122/9983	0.000110709	0.00955686	0.00899474	Seita.1G130300/Seita.1G169800/Seita.1G231200/Seita.1G274100/Seita.1G379500/Seita.2G159000/Seita.2G197500/Seita.2G426200/Seita.3G030500/Seita.3G049900/Seita.3G051000/Seita.3G166700/Seita.3G215300/Seita.3G333100/Seita.4G138500/Seita.4G159500/Seita.4G175000/Seita.5G085100/Seita.5G103100/Seita.5G124100/Seita.5G270400/Seita.5G324300/Seita.5G342100/Seita.6G123500/Seita.7G182800/Seita.7G218000/Seita.7G2…	40		Ci328up	BP	GO:0009409	response to cold	23/258	368/9983	7.94571e-05	0.00982885	0.00935922	Seita.1G192100/Seita.1G308900/Seita.2G053800/Seita.2G142500/Seita.2G164500/Seita.3G144000/Seita.5G166300/Seita.5G421200/Seita.6G055700/Seita.7G102200/Seita.7G149600/Seita.7G213800/Seita.7G228200/Seita.8G115200/Seita.8G115400/Seita.8G125500/Seita.9G198800/Seita.9G278500/Seita.9G416100/Seita.9G424800/Seita.9G487500/Seita.9G510100/Seita.9G517700	23		Ci409DEG	CC	GO:0098807	chloroplast thylakoid membrane protein complex	7/1107	11/9955	4.54571e-05	0.000951352	0.00091256	Seita.1G003200/Seita.1G013300/Seita.2G248100/Seita.2G330500/Seita.5G067800/Seita.8G080900/Seita.9G342500	7
Ci328DEG	BP	GO:0005975	carbohydrate metabolic process	120/1852	474/9983	0.000112847	0.00955686	0.00899474	Seita.1G080900/Seita.1G112000/Seita.1G112800/Seita.1G123400/Seita.1G123500/Seita.1G127500/Seita.1G213900/Seita.1G244200/Seita.1G262000/Seita.1G268900/Seita.1G294300/Seita.1G314700/Seita.1G323700/Seita.2G080900/Seita.2G081000/Seita.2G168000/Seita.2G187800/Seita.2G187900/Seita.2G188200/Seita.2G209100/Seita.2G237100/Seita.2G290900/Seita.2G384400/Seita.2G396200/Seita.3G011800/Seita.3G046000/Seita.3G0…	120		Ci328up	BP	GO:0046677	response to antibiotic	20/258	299/9983	9.3827e-05	0.0105513	0.0100471	Seita.1G012200/Seita.1G209000/Seita.1G250600/Seita.2G352600/Seita.3G175700/Seita.3G192300/Seita.3G232500/Seita.5G092400/Seita.5G207000/Seita.5G263500/Seita.5G421200/Seita.6G055700/Seita.7G101100/Seita.7G167900/Seita.8G173800/Seita.8G222300/Seita.9G424800/Seita.9G470600/Seita.9G484700/Seita.9G488400	20		Ci409DEG	CC	GO:0031225	anchored component of membrane	32/1107	142/9955	6.63919e-05	0.00129685	0.00124397	Seita.1G061800/Seita.1G322500/Seita.2G044900/Seita.2G154700/Seita.2G199400/Seita.2G199500/Seita.3G102200/Seita.3G146800/Seita.3G182000/Seita.3G225200/Seita.3G263800/Seita.3G315000/Seita.4G084200/Seita.5G122100/Seita.5G311700/Seita.5G328200/Seita.5G390300/Seita.5G448000/Seita.5G448400/Seita.6G201700/Seita.6G202800/Seita.6G224400/Seita.8G079300/Seita.9G060800/Seita.9G088400/Seita.9G112400/Seita.9G1…	32
Ci328DEG	BP	GO:0098771	inorganic ion homeostasis	54/1852	180/9983	0.000118669	0.00955686	0.00899474	Seita.1G002200/Seita.1G019500/Seita.1G130300/Seita.1G169800/Seita.1G231200/Seita.1G256100/Seita.1G263000/Seita.1G274100/Seita.1G278500/Seita.1G281500/Seita.1G379500/Seita.2G090300/Seita.2G159000/Seita.2G197500/Seita.2G309200/Seita.2G372300/Seita.2G426200/Seita.3G030500/Seita.3G049900/Seita.3G051000/Seita.3G101400/Seita.3G150400/Seita.3G166700/Seita.3G215300/Seita.3G333100/Seita.3G375800/Seita.3G3…	54		Ci328up	BP	GO:0071229	cellular response to acid chemical	26/258	457/9983	0.00012829	0.0132245	0.0125927	Seita.1G257200/Seita.1G257300/Seita.1G331600/Seita.1G335200/Seita.2G144900/Seita.2G156200/Seita.2G193000/Seita.2G217500/Seita.3G139000/Seita.3G144000/Seita.3G157100/Seita.3G164700/Seita.3G193800/Seita.3G246300/Seita.5G263500/Seita.5G393800/Seita.5G394300/Seita.5G421200/Seita.6G144900/Seita.9G198800/Seita.9G252500/Seita.9G278500/Seita.9G341400/Seita.9G424800/Seita.9G460200/Seita.9G484700	26		Ci409DEG	CC	GO:0010287	plastoglobule	15/1107	47/9955	0.000107305	0.00196502	0.0018849	Seita.1G293700/Seita.1G321900/Seita.2G166700/Seita.2G217800/Seita.2G351600/Seita.2G352900/Seita.3G143800/Seita.4G139900/Seita.4G219400/Seita.5G166000/Seita.8G080900/Seita.9G124200/Seita.9G177100/Seita.9G191500/Seita.J017900	15
Ci328DEG	BP	GO:0016053	organic acid biosynthetic process	107/1852	415/9983	0.000123494	0.00955686	0.00899474	Seita.1G021400/Seita.1G106400/Seita.1G127500/Seita.1G195100/Seita.1G219200/Seita.1G259400/Seita.1G304800/Seita.1G371900/Seita.2G000900/Seita.2G104900/Seita.2G144900/Seita.2G190100/Seita.2G290900/Seita.2G300900/Seita.2G389400/Seita.2G390100/Seita.2G400600/Seita.3G011800/Seita.3G015800/Seita.3G020300/Seita.3G109600/Seita.3G111200/Seita.3G153400/Seita.3G167400/Seita.3G220500/Seita.3G231000/Seita.3G3…	107		Ci328up	BP	GO:0009631	cold acclimation	6/258	35/9983	0.000242999	0.0231222	0.0220174	Seita.1G192100/Seita.3G144000/Seita.5G166300/Seita.7G102200/Seita.8G115200/Seita.8G115400	6		Ci409DEG	CC	GO:0031226	intrinsic component of plasma membrane	58/1107	331/9955	0.000267216	0.00460555	0.00441776	Seita.1G116600/Seita.1G135700/Seita.1G216200/Seita.1G318800/Seita.1G322500/Seita.1G372300/Seita.2G044900/Seita.2G154700/Seita.2G199400/Seita.2G199500/Seita.2G211300/Seita.3G068600/Seita.3G073300/Seita.3G082100/Seita.3G146800/Seita.3G182000/Seita.3G225200/Seita.3G263800/Seita.3G315000/Seita.3G319400/Seita.3G333100/Seita.4G005300/Seita.4G006600/Seita.4G051900/Seita.4G084200/Seita.4G160700/Seita.5G0…	58
Ci328DEG	BP	GO:0046394	carboxylic acid biosynthetic process	107/1852	415/9983	0.000123494	0.00955686	0.00899474	Seita.1G021400/Seita.1G106400/Seita.1G127500/Seita.1G195100/Seita.1G219200/Seita.1G259400/Seita.1G304800/Seita.1G371900/Seita.2G000900/Seita.2G104900/Seita.2G144900/Seita.2G190100/Seita.2G290900/Seita.2G300900/Seita.2G389400/Seita.2G390100/Seita.2G400600/Seita.3G011800/Seita.3G015800/Seita.3G020300/Seita.3G109600/Seita.3G111200/Seita.3G153400/Seita.3G167400/Seita.3G220500/Seita.3G231000/Seita.3G3…	107		Ci328up	BP	GO:0071482	cellular response to light stimulus	9/258	91/9983	0.000552042	0.0487768	0.0464462	Seita.1G250600/Seita.2G053800/Seita.2G444300/Seita.3G126900/Seita.5G367800/Seita.6G049900/Seita.7G046200/Seita.7G088700/Seita.7G257400	9		Ci409DEG	CC	GO:0005576	extracellular region	65/1107	384/9955	0.000319744	0.00520472	0.00499249	Seita.1G002800/Seita.1G013300/Seita.1G061800/Seita.1G170500/Seita.1G245800/Seita.1G324300/Seita.1G341200/Seita.1G349800/Seita.2G044900/Seita.2G168000/Seita.2G182700/Seita.2G188200/Seita.2G223900/Seita.2G288000/Seita.2G288700/Seita.2G343000/Seita.2G418200/Seita.3G007600/Seita.3G010200/Seita.3G035500/Seita.3G097400/Seita.3G235400/Seita.3G263800/Seita.3G315000/Seita.3G356500/Seita.3G397200/Seita.4G0…	65
Ci328DEG	BP	GO:0042592	homeostatic process	107/1852	418/9983	0.00016696	0.0125168	0.0117806	Seita.1G002200/Seita.1G019500/Seita.1G130300/Seita.1G155500/Seita.1G166600/Seita.1G169800/Seita.1G230100/Seita.1G231200/Seita.1G256100/Seita.1G263000/Seita.1G274100/Seita.1G278500/Seita.1G281500/Seita.1G291400/Seita.1G333100/Seita.1G373300/Seita.1G379500/Seita.2G038000/Seita.2G090300/Seita.2G159000/Seita.2G197500/Seita.2G229900/Seita.2G264800/Seita.2G277900/Seita.2G309200/Seita.2G372300/Seita.2G4…	107		Ci328up	CC	GO:0034357	photosynthetic membrane	17/238	244/9955	7.545e-05	0.00427787	0.00367594	Seita.1G192100/Seita.2G046600/Seita.2G053800/Seita.2G109800/Seita.2G164500/Seita.3G144000/Seita.3G158600/Seita.5G039100/Seita.5G395300/Seita.7G102200/Seita.7G183200/Seita.7G257400/Seita.7G261400/Seita.8G173800/Seita.9G077800/Seita.9G483700/Seita.9G525700	17		Ci409DEG	MF	GO:0016168	chlorophyll binding	11/981	15/8539	3.84869e-08	2.10908e-05	1.99322e-05	Seita.2G166700/Seita.2G217800/Seita.2G351600/Seita.2G352900/Seita.3G143800/Seita.4G139900/Seita.4G219400/Seita.7G257400/Seita.8G080900/Seita.9G177100/Seita.J017900	11
Ci328DEG	BP	GO:0042542	response to hydrogen peroxide	30/1852	85/9983	0.00018187	0.0132214	0.0124437	Seita.1G012200/Seita.1G045200/Seita.1G117500/Seita.1G219700/Seita.2G179700/Seita.2G179800/Seita.3G060800/Seita.3G175700/Seita.4G067200/Seita.5G092400/Seita.5G207000/Seita.5G249900/Seita.5G315500/Seita.5G342100/Seita.5G384200/Seita.5G421200/Seita.6G132800/Seita.7G124900/Seita.7G141400/Seita.7G331800/Seita.8G053300/Seita.8G106200/Seita.9G137000/Seita.9G357200/Seita.9G424800/Seita.9G425300/Seita.9G4…	30		Ci328up	CC	GO:0042651	thylakoid membrane	17/238	244/9955	7.545e-05	0.00427787	0.00367594	Seita.1G192100/Seita.2G046600/Seita.2G053800/Seita.2G109800/Seita.2G164500/Seita.3G144000/Seita.3G158600/Seita.5G039100/Seita.5G395300/Seita.7G102200/Seita.7G183200/Seita.7G257400/Seita.7G261400/Seita.8G173800/Seita.9G077800/Seita.9G483700/Seita.9G525700	17		Ci409DEG	MF	GO:0046906	tetrapyrrole binding	13/981	31/8539	1.58656e-05	0.00434717	0.00410835	Seita.1G117500/Seita.2G166700/Seita.2G217800/Seita.2G351600/Seita.2G352900/Seita.3G143800/Seita.4G139900/Seita.4G219400/Seita.7G257400/Seita.8G080900/Seita.8G104100/Seita.9G177100/Seita.J017900	13
Ci328DEG	BP	GO:0010345	suberin biosynthetic process	15/1852	32/9983	0.000233337	0.016464	0.0154956	Seita.1G219200/Seita.2G132800/Seita.3G142500/Seita.3G218600/Seita.4G021600/Seita.5G069500/Seita.5G130200/Seita.5G386300/Seita.5G434700/Seita.6G243900/Seita.6G244000/Seita.8G128800/Seita.9G214500/Seita.9G344800/Seita.9G545500	15		Ci328up	CC	GO:0009535	chloroplast thylakoid membrane	16/238	227/9955	0.000107329	0.00427787	0.00367594	Seita.1G192100/Seita.2G046600/Seita.2G053800/Seita.2G109800/Seita.2G164500/Seita.3G144000/Seita.5G039100/Seita.5G395300/Seita.7G102200/Seita.7G183200/Seita.7G257400/Seita.7G261400/Seita.8G173800/Seita.9G077800/Seita.9G483700/Seita.9G525700	16		Ci409DEG	MF	GO:0015114	phosphate ion transmembrane transporter activity	7/981	11/8539	5.62043e-05	0.00797592	0.00753775	Seita.1G216200/Seita.1G231800/Seita.2G167400/Seita.2G228300/Seita.5G121600/Seita.6G118800/Seita.7G157900	7
Ci328DEG	BP	GO:0098754	detoxification	40/1852	126/9983	0.000240513	0.0164854	0.0155158	Seita.1G079000/Seita.1G117500/Seita.1G192100/Seita.2G033500/Seita.2G090300/Seita.2G132500/Seita.2G178900/Seita.2G406500/Seita.3G060800/Seita.3G089400/Seita.3G096900/Seita.3G097200/Seita.3G099600/Seita.3G190400/Seita.3G270300/Seita.3G286500/Seita.4G259700/Seita.5G046600/Seita.5G053000/Seita.5G053100/Seita.5G346500/Seita.5G442000/Seita.5G463200/Seita.6G053800/Seita.6G153400/Seita.6G210000/Seita.7G0…	40		Ci328up	CC	GO:0009579	thylakoid	21/238	359/9955	0.000137757	0.00427787	0.00367594	Seita.1G192100/Seita.2G046600/Seita.2G053800/Seita.2G109800/Seita.2G164500/Seita.3G144000/Seita.3G158600/Seita.5G039100/Seita.5G395300/Seita.5G442500/Seita.6G188600/Seita.6G251800/Seita.7G102200/Seita.7G183200/Seita.7G257400/Seita.7G261400/Seita.8G173800/Seita.9G077800/Seita.9G483700/Seita.9G525700/Seita.9G541100	21		Ci409DEG	MF	GO:0048037	cofactor binding	42/981	199/8539	5.82184e-05	0.00797592	0.00753775	Seita.1G065700/Seita.1G117500/Seita.2G104900/Seita.2G105100/Seita.2G166700/Seita.2G217800/Seita.2G351600/Seita.2G352900/Seita.3G143800/Seita.3G206500/Seita.3G330000/Seita.3G346000/Seita.3G348900/Seita.3G397200/Seita.4G101400/Seita.4G139900/Seita.4G191600/Seita.4G219400/Seita.5G064500/Seita.5G246700/Seita.5G280800/Seita.5G384100/Seita.5G447400/Seita.5G456100/Seita.6G005700/Seita.7G257400/Seita.8G0…	42
Ci328DEG	BP	GO:0016132	brassinosteroid biosynthetic process	11/1852	20/9983	0.000279712	0.0186397	0.0175433	Seita.2G229900/Seita.2G231300/Seita.3G116300/Seita.5G139200/Seita.6G089500/Seita.7G132100/Seita.7G204200/Seita.7G318000/Seita.8G027000/Seita.8G166500/Seita.9G021400	11		Ci328up	CC	GO:0055035	plastid thylakoid membrane	16/238	233/9955	0.000145506	0.00427787	0.00367594	Seita.1G192100/Seita.2G046600/Seita.2G053800/Seita.2G109800/Seita.2G164500/Seita.3G144000/Seita.5G039100/Seita.5G395300/Seita.7G102200/Seita.7G183200/Seita.7G257400/Seita.7G261400/Seita.8G173800/Seita.9G077800/Seita.9G483700/Seita.9G525700	16		Ci409DEG	MF	GO:0030247	polysaccharide binding	18/981	60/8539	8.65962e-05	0.00949094	0.00896954	Seita.2G044900/Seita.2G422000/Seita.3G182000/Seita.3G225200/Seita.3G263800/Seita.3G315000/Seita.5G311700/Seita.5G328200/Seita.5G390300/Seita.5G448000/Seita.5G448400/Seita.6G128700/Seita.8G079300/Seita.9G060800/Seita.9G112400/Seita.9G150500/Seita.9G373900/Seita.9G532500	18
Ci328DEG	BP	GO:0009624	response to nematode	31/1852	91/9983	0.000296556	0.0188694	0.0177595	Seita.1G028000/Seita.1G379500/Seita.2G026700/Seita.2G090200/Seita.2G335600/Seita.2G368200/Seita.2G441700/Seita.3G193100/Seita.3G350700/Seita.4G106500/Seita.4G145400/Seita.5G022400/Seita.5G039100/Seita.5G274500/Seita.6G020900/Seita.7G039700/Seita.7G039900/Seita.7G043900/Seita.7G064100/Seita.7G076700/Seita.7G076800/Seita.7G228200/Seita.8G025400/Seita.8G084200/Seita.8G181700/Seita.9G226700/Seita.9G2…	31		Ci328up	CC	GO:0009534	chloroplast thylakoid	18/238	293/9955	0.000229557	0.00562415	0.00483278	Seita.1G192100/Seita.2G046600/Seita.2G053800/Seita.2G109800/Seita.2G164500/Seita.3G144000/Seita.5G039100/Seita.5G395300/Seita.6G188600/Seita.7G102200/Seita.7G183200/Seita.7G257400/Seita.7G261400/Seita.8G173800/Seita.9G077800/Seita.9G483700/Seita.9G525700/Seita.9G541100	18		Ci409DEG	MF	GO:0004553	hydrolase activity, hydrolyzing O-glycosyl compounds	45/981	228/8539	0.000170848	0.0148297	0.014015	Seita.1G004600/Seita.1G013300/Seita.2G044900/Seita.2G081000/Seita.2G188200/Seita.2G279000/Seita.3G182000/Seita.3G225200/Seita.3G263800/Seita.3G315000/Seita.4G191200/Seita.4G234100/Seita.5G056800/Seita.5G157600/Seita.5G258600/Seita.5G295100/Seita.5G311700/Seita.5G316000/Seita.5G328200/Seita.5G390300/Seita.5G408800/Seita.5G448000/Seita.5G448400/Seita.7G164300/Seita.7G257800/Seita.8G079300/Seita.8G1…	45
Ci328DEG	BP	GO:0016125	sterol metabolic process	25/1852	68/9983	0.00029889	0.0188694	0.0177595	Seita.1G150500/Seita.1G362600/Seita.2G079200/Seita.2G229900/Seita.2G257000/Seita.3G116300/Seita.5G068300/Seita.5G139200/Seita.6G089500/Seita.7G132100/Seita.7G140400/Seita.7G204200/Seita.7G318000/Seita.8G014200/Seita.8G027000/Seita.8G041200/Seita.8G136000/Seita.8G136400/Seita.8G166500/Seita.9G021400/Seita.9G077900/Seita.9G205600/Seita.9G205700/Seita.9G205800/Seita.9G483700	25		Ci328up	CC	GO:0031976	plastid thylakoid	18/238	297/9955	0.000271101	0.00569313	0.00489206	Seita.1G192100/Seita.2G046600/Seita.2G053800/Seita.2G109800/Seita.2G164500/Seita.3G144000/Seita.5G039100/Seita.5G395300/Seita.6G188600/Seita.7G102200/Seita.7G183200/Seita.7G257400/Seita.7G261400/Seita.8G173800/Seita.9G077800/Seita.9G483700/Seita.9G525700/Seita.9G541100	18		Ci409DEG	MF	GO:0016798	hydrolase activity, acting on glycosyl bonds	48/981	249/8539	0.00018943	0.0148297	0.014015	Seita.1G004600/Seita.1G013300/Seita.1G192000/Seita.2G044900/Seita.2G081000/Seita.2G188200/Seita.2G279000/Seita.3G182000/Seita.3G225200/Seita.3G263800/Seita.3G315000/Seita.4G191200/Seita.4G234100/Seita.5G056800/Seita.5G064300/Seita.5G157600/Seita.5G258600/Seita.5G295100/Seita.5G311700/Seita.5G316000/Seita.5G328200/Seita.5G390300/Seita.5G408800/Seita.5G448000/Seita.5G448400/Seita.6G243800/Seita.7G1…	48
Ci328DEG	BP	GO:0055080	cation homeostasis	49/1852	165/9983	0.000313351	0.0192751	0.0181414	Seita.1G002200/Seita.1G019500/Seita.1G130300/Seita.1G169800/Seita.1G231200/Seita.1G274100/Seita.1G278500/Seita.1G281500/Seita.1G379500/Seita.2G090300/Seita.2G159000/Seita.2G197500/Seita.2G309200/Seita.2G372300/Seita.2G426200/Seita.3G030500/Seita.3G049900/Seita.3G051000/Seita.3G101400/Seita.3G166700/Seita.3G215300/Seita.3G333100/Seita.3G375800/Seita.3G391700/Seita.4G138500/Seita.4G175000/Seita.5G0…	49		Ci409up	BP	GO:0009408	response to heat	15/96	199/9983	5.82855e-10	4.42387e-07	4.27018e-07	Seita.1G012200/Seita.1G045200/Seita.1G326600/Seita.1G342400/Seita.2G053800/Seita.2G241600/Seita.2G287200/Seita.3G175700/Seita.4G111400/Seita.4G267900/Seita.5G092400/Seita.5G092900/Seita.5G093000/Seita.7G060200/Seita.9G488400	15		Ci409DEG	MF	GO:0015036	disulfide oxidoreductase activity	13/981	42/8539	0.000586839	0.0395927	0.0374176	Seita.1G336800/Seita.2G312300/Seita.3G016700/Seita.3G031300/Seita.4G101400/Seita.5G346500/Seita.5G463500/Seita.6G129100/Seita.6G176000/Seita.7G231200/Seita.7G279700/Seita.9G237000/Seita.9G370000	13
Ci328DEG	BP	GO:0090693	plant organ senescence	52/1852	178/9983	0.000324843	0.0194188	0.0182767	Seita.1G166500/Seita.1G278500/Seita.1G315600/Seita.1G362600/Seita.2G013500/Seita.2G072100/Seita.2G179700/Seita.2G179800/Seita.2G300900/Seita.2G309200/Seita.2G387600/Seita.2G436000/Seita.2G436400/Seita.2G441700/Seita.3G008300/Seita.3G160800/Seita.3G287100/Seita.3G379400/Seita.4G017200/Seita.4G054000/Seita.4G054900/Seita.4G067200/Seita.4G105900/Seita.4G106300/Seita.4G155100/Seita.4G247100/Seita.5G0…	52		Ci409up	BP	GO:0009644	response to high light intensity	10/96	80/9983	3.96751e-09	1.50567e-06	1.45336e-06	Seita.1G012200/Seita.1G045200/Seita.2G053800/Seita.3G175700/Seita.4G099200/Seita.5G014300/Seita.5G092400/Seita.9G272800/Seita.9G457400/Seita.9G488400	10		Ci409DEG	MF	GO:0005527	macrolide binding	7/981	15/8539	0.000722494	0.0395927	0.0374176	Seita.1G112900/Seita.1G322800/Seita.2G318800/Seita.7G037600/Seita.7G060200/Seita.9G106800/Seita.9G121900	7
Ci328DEG	BP	GO:0006790	sulfur compound metabolic process	66/1852	239/9983	0.000331877	0.0194188	0.0182767	Seita.1G064100/Seita.1G270800/Seita.1G271000/Seita.1G345400/Seita.2G033500/Seita.2G104900/Seita.2G132800/Seita.2G178900/Seita.2G180100/Seita.2G278500/Seita.2G337800/Seita.2G436000/Seita.3G018100/Seita.3G060800/Seita.3G140700/Seita.3G167400/Seita.3G186600/Seita.3G187400/Seita.3G189100/Seita.3G282000/Seita.3G299600/Seita.4G024000/Seita.4G248900/Seita.5G047800/Seita.5G066400/Seita.5G069100/Seita.5G0…	66		Ci409up	BP	GO:0009642	response to light intensity	10/96	127/9983	3.4785e-07	8.80061e-05	8.49487e-05	Seita.1G012200/Seita.1G045200/Seita.2G053800/Seita.3G175700/Seita.4G099200/Seita.5G014300/Seita.5G092400/Seita.9G272800/Seita.9G457400/Seita.9G488400	10		Ci409DEG	MF	GO:0005528	FK506 binding	7/981	15/8539	0.000722494	0.0395927	0.0374176	Seita.1G112900/Seita.1G322800/Seita.2G318800/Seita.7G037600/Seita.7G060200/Seita.9G106800/Seita.9G121900	7
Ci328DEG	BP	GO:0009834	plant-type secondary cell wall biogenesis	26/1852	73/9983	0.000406968	0.0228598	0.0215152	Seita.1G080900/Seita.1G281500/Seita.1G309600/Seita.2G080900/Seita.2G199800/Seita.2G209100/Seita.3G046000/Seita.3G132100/Seita.3G158500/Seita.4G115200/Seita.4G253800/Seita.5G319100/Seita.5G363400/Seita.5G402400/Seita.5G437300/Seita.6G086100/Seita.6G154200/Seita.6G251100/Seita.7G005300/Seita.7G110400/Seita.7G220500/Seita.7G264000/Seita.7G272500/Seita.9G227400/Seita.9G345100/Seita.9G560500	26		Ci409up	BP	GO:0009414	response to water deprivation	14/96	340/9983	4.12213e-06	0.000782175	0.000755001	Seita.2G035400/Seita.2G142500/Seita.2G241600/Seita.2G406500/Seita.3G193800/Seita.5G119800/Seita.5G166200/Seita.5G393800/Seita.7G184600/Seita.8G115400/Seita.9G039200/Seita.9G198800/Seita.9G229700/Seita.9G410800	14		Ci409DEG	MF	GO:0016667	oxidoreductase activity, acting on a sulfur group of donors	16/981	60/8539	0.000907183	0.0451942	0.0427114	Seita.1G336800/Seita.2G312300/Seita.2G436600/Seita.3G016700/Seita.3G031300/Seita.3G248500/Seita.4G101400/Seita.5G346500/Seita.5G463500/Seita.6G129100/Seita.6G176000/Seita.7G231200/Seita.7G279700/Seita.9G237000/Seita.9G370000/Seita.9G418200	16
Ci328DEG	BP	GO:0010150	leaf senescence	50/1852	171/9983	0.000409743	0.0228598	0.0215152	Seita.1G166500/Seita.1G278500/Seita.1G315600/Seita.1G362600/Seita.2G013500/Seita.2G072100/Seita.2G179700/Seita.2G179800/Seita.2G300900/Seita.2G309200/Seita.2G387600/Seita.2G436000/Seita.2G436400/Seita.2G441700/Seita.3G008300/Seita.3G160800/Seita.3G287100/Seita.3G379400/Seita.4G017200/Seita.4G054000/Seita.4G054900/Seita.4G067200/Seita.4G105900/Seita.4G106300/Seita.4G247100/Seita.5G064300/Seita.5G0…	50		Ci409up	BP	GO:0009415	response to water	14/96	347/9983	5.21912e-06	0.000792263	0.000764739	Seita.2G035400/Seita.2G142500/Seita.2G241600/Seita.2G406500/Seita.3G193800/Seita.5G119800/Seita.5G166200/Seita.5G393800/Seita.7G184600/Seita.8G115400/Seita.9G039200/Seita.9G198800/Seita.9G229700/Seita.9G410800	14		Ci409DEG	MF	GO:0016209	antioxidant activity	21/981	90/8539	0.00106632	0.0486951	0.04602	Seita.1G079000/Seita.1G117500/Seita.1G192100/Seita.1G336800/Seita.2G312300/Seita.3G016700/Seita.4G011900/Seita.4G101400/Seita.5G046600/Seita.5G174100/Seita.5G263000/Seita.5G346500/Seita.5G463500/Seita.6G129100/Seita.7G102200/Seita.7G225300/Seita.7G231200/Seita.7G279700/Seita.9G131200/Seita.9G237000/Seita.9G370000	21
Ci328DEG	BP	GO:0015893	drug transport	37/1852	117/9983	0.0004402	0.023923	0.0225159	Seita.1G270500/Seita.2G001400/Seita.2G026700/Seita.2G278500/Seita.2G324100/Seita.2G335300/Seita.2G360800/Seita.3G356700/Seita.3G357100/Seita.3G357700/Seita.4G006500/Seita.4G006600/Seita.4G145400/Seita.4G273500/Seita.5G015100/Seita.5G048000/Seita.5G124100/Seita.5G274100/Seita.5G302300/Seita.5G333300/Seita.6G098800/Seita.6G185600/Seita.6G186200/Seita.7G039700/Seita.7G039900/Seita.7G043900/Seita.7G0…	37		Ci409up	BP	GO:0006979	response to oxidative stress	14/96	380/9983	1.47098e-05	0.00186079	0.00179615	Seita.1G012200/Seita.1G045200/Seita.1G210300/Seita.1G335200/Seita.2G081000/Seita.3G111700/Seita.3G160800/Seita.3G175700/Seita.4G111400/Seita.5G092400/Seita.5G119800/Seita.9G198800/Seita.9G488400/Seita.J011900	14		Ci409DEG	MF	GO:0043168	anion binding	66/981	398/8539	0.00118155	0.0496809	0.0469516	Seita.1G013900/Seita.1G143800/Seita.1G291000/Seita.1G337400/Seita.2G104900/Seita.2G105100/Seita.2G147800/Seita.2G166700/Seita.2G217800/Seita.2G320000/Seita.2G351600/Seita.2G352900/Seita.2G360500/Seita.3G002200/Seita.3G005400/Seita.3G047800/Seita.3G143800/Seita.3G206500/Seita.3G346000/Seita.3G348900/Seita.3G373500/Seita.3G397200/Seita.4G101400/Seita.4G102400/Seita.4G122200/Seita.4G139900/Seita.4G2…	66
Ci328DEG	BP	GO:0030003	cellular cation homeostasis	35/1852	109/9983	0.000452254	0.023923	0.0225159	Seita.1G130300/Seita.1G169800/Seita.1G231200/Seita.1G274100/Seita.1G379500/Seita.2G159000/Seita.2G197500/Seita.2G426200/Seita.3G030500/Seita.3G049900/Seita.3G051000/Seita.3G166700/Seita.3G215300/Seita.3G333100/Seita.4G138500/Seita.4G175000/Seita.5G085100/Seita.5G103100/Seita.5G124100/Seita.5G270400/Seita.5G324300/Seita.5G342100/Seita.7G182800/Seita.7G218000/Seita.7G288300/Seita.7G331800/Seita.8G0…	35		Ci409up	BP	GO:0009845	seed germination	9/96	176/9983	4.6613e-05	0.00505418	0.00487859	Seita.1G335200/Seita.2G053800/Seita.3G139000/Seita.3G193800/Seita.4G143700/Seita.4G159500/Seita.6G123500/Seita.8G118200/Seita.9G460200	9		Ci409DEG	MF	GO:0004791	thioredoxin-disulfide reductase activity	10/981	30/8539	0.00132694	0.0496809	0.0469516	Seita.1G336800/Seita.2G312300/Seita.3G016700/Seita.5G346500/Seita.5G463500/Seita.6G129100/Seita.7G231200/Seita.7G279700/Seita.9G237000/Seita.9G370000	10
Ci328DEG	BP	GO:0006875	cellular metal ion homeostasis	32/1852	97/9983	0.000458715	0.023923	0.0225159	Seita.1G130300/Seita.1G169800/Seita.1G231200/Seita.1G274100/Seita.1G379500/Seita.2G159000/Seita.2G197500/Seita.2G426200/Seita.3G030500/Seita.3G049900/Seita.3G051000/Seita.3G166700/Seita.3G215300/Seita.4G175000/Seita.5G085100/Seita.5G103100/Seita.5G270400/Seita.5G324300/Seita.5G342100/Seita.7G182800/Seita.7G218000/Seita.7G288300/Seita.7G331800/Seita.8G041200/Seita.8G114700/Seita.8G118200/Seita.9G2…	32		Ci409up	BP	GO:0090351	seedling development	9/96	183/9983	6.31686e-05	0.00599312	0.00578492	Seita.1G335200/Seita.2G053800/Seita.3G139000/Seita.3G193800/Seita.4G143700/Seita.4G159500/Seita.6G123500/Seita.8G118200/Seita.9G460200	9		Ci409DEG	MF	GO:0015103	inorganic anion transmembrane transporter activity	19/981	80/8539	0.00145054	0.0496809	0.0469516	Seita.1G216200/Seita.1G231800/Seita.1G318800/Seita.2G167400/Seita.2G228300/Seita.3G283100/Seita.3G283600/Seita.3G300700/Seita.3G406500/Seita.5G121600/Seita.5G124100/Seita.5G198500/Seita.6G118800/Seita.7G157900/Seita.9G327900/Seita.9G328000/Seita.9G532700/Seita.9G540800/Seita.J031500	19
Ci328DEG	BP	GO:0010623	programmed cell death involved in cell development	7/1852	10/9983	0.000530376	0.0269697	0.0253834	Seita.1G295700/Seita.2G081200/Seita.3G067600/Seita.5G467700/Seita.6G142300/Seita.7G038400/Seita.7G038500	7		Ci409up	BP	GO:0000302	response to reactive oxygen species	9/96	197/9983	0.000111425	0.0087651	0.00846059	Seita.1G012200/Seita.1G045200/Seita.1G210300/Seita.1G335200/Seita.3G175700/Seita.4G111400/Seita.5G092400/Seita.9G198800/Seita.9G488400	9		Ci409DEG	MF	GO:0030246	carbohydrate binding	19/981	80/8539	0.00145054	0.0496809	0.0469516	Seita.2G044900/Seita.2G422000/Seita.3G182000/Seita.3G225200/Seita.3G263800/Seita.3G315000/Seita.5G069300/Seita.5G311700/Seita.5G328200/Seita.5G390300/Seita.5G448000/Seita.5G448400/Seita.6G128700/Seita.8G079300/Seita.9G060800/Seita.9G112400/Seita.9G150500/Seita.9G373900/Seita.9G532500	19
Ci328DEG	BP	GO:0046916	cellular transition metal ion homeostasis	22/1852	59/9983	0.000539618	0.0269697	0.0253834	Seita.1G169800/Seita.1G274100/Seita.1G379500/Seita.2G159000/Seita.2G197500/Seita.2G426200/Seita.3G030500/Seita.3G049900/Seita.3G051000/Seita.3G215300/Seita.4G175000/Seita.5G085100/Seita.5G103100/Seita.5G270400/Seita.5G324300/Seita.5G342100/Seita.7G182800/Seita.7G218000/Seita.7G331800/Seita.8G114700/Seita.9G344700/Seita.9G537500	22		Ci409up	BP	GO:0010030	positive regulation of seed germination	4/96	27/9983	0.000118944	0.0087651	0.00846059	Seita.1G335200/Seita.2G053800/Seita.3G139000/Seita.4G143700	4		Ci134up	BP	GO:0009415	response to water	34/446	347/9983	1.30037e-05	0.0148588	0.0140008	Seita.1G267200/Seita.1G324300/Seita.2G035400/Seita.2G142500/Seita.2G252300/Seita.2G284000/Seita.3G144000/Seita.3G157100/Seita.3G162400/Seita.3G193800/Seita.4G082000/Seita.5G069100/Seita.5G166200/Seita.5G166300/Seita.5G319100/Seita.5G351300/Seita.5G393800/Seita.6G073100/Seita.6G114000/Seita.6G151500/Seita.7G116800/Seita.7G168700/Seita.7G184600/Seita.7G228200/Seita.8G008100/Seita.8G115200/Seita.8G1…	34
Ci328DEG	BP	GO:0034637	cellular carbohydrate biosynthetic process	46/1852	156/9983	0.000559785	0.0274066	0.0257946	Seita.1G080900/Seita.1G123400/Seita.1G123500/Seita.1G244200/Seita.1G262000/Seita.1G268900/Seita.1G323700/Seita.2G080900/Seita.2G168000/Seita.2G188200/Seita.2G209100/Seita.2G396200/Seita.3G046000/Seita.3G096400/Seita.3G132100/Seita.3G133300/Seita.3G158500/Seita.3G227500/Seita.4G092100/Seita.4G213700/Seita.4G223900/Seita.4G253800/Seita.5G069500/Seita.5G319100/Seita.5G402400/Seita.5G434700/Seita.5G4…	46		Ci409up	BP	GO:0010029	regulation of seed germination	6/96	82/9983	0.000131336	0.0087651	0.00846059	Seita.1G335200/Seita.2G053800/Seita.3G139000/Seita.3G193800/Seita.4G143700/Seita.8G118200	6		Ci134up	BP	GO:0009834	plant-type secondary cell wall biogenesis	13/446	73/9983	1.76052e-05	0.0148588	0.0140008	Seita.1G080900/Seita.1G309600/Seita.2G200100/Seita.2G200200/Seita.2G209100/Seita.3G217800/Seita.3G275400/Seita.4G289300/Seita.5G319100/Seita.7G220500/Seita.8G252500/Seita.9G227400/Seita.9G560500	13
Ci328DEG	BP	GO:0008610	lipid biosynthetic process	101/1852	404/9983	0.000621134	0.029802	0.0280491	Seita.1G021400/Seita.1G106400/Seita.1G112000/Seita.1G181900/Seita.1G195100/Seita.1G219200/Seita.1G288600/Seita.1G304800/Seita.1G367300/Seita.2G000900/Seita.2G079200/Seita.2G104900/Seita.2G144900/Seita.2G187800/Seita.2G187900/Seita.2G190100/Seita.2G229900/Seita.2G231300/Seita.2G257000/Seita.2G290900/Seita.2G300900/Seita.2G303000/Seita.2G368100/Seita.2G389400/Seita.2G390100/Seita.2G400600/Seita.3G0…	101		Ci409up	BP	GO:0065002	intracellular protein transmembrane transport	6/96	84/9983	0.000150127	0.0087651	0.00846059	Seita.2G241600/Seita.2G287200/Seita.5G011800/Seita.5G012100/Seita.5G026800/Seita.9G431100	6		Ci134up	BP	GO:0009414	response to water deprivation	32/446	340/9983	5.19007e-05	0.0292028	0.0275165	Seita.1G267200/Seita.1G324300/Seita.2G035400/Seita.2G142500/Seita.2G252300/Seita.2G284000/Seita.3G144000/Seita.3G157100/Seita.3G162400/Seita.3G193800/Seita.4G082000/Seita.5G166200/Seita.5G166300/Seita.5G319100/Seita.5G351300/Seita.5G393800/Seita.6G073100/Seita.6G114000/Seita.6G151500/Seita.7G116800/Seita.7G168700/Seita.7G184600/Seita.7G228200/Seita.8G115200/Seita.8G115400/Seita.8G125500/Seita.9G0…	32
Ci328DEG	BP	GO:0010243	response to organonitrogen compound	63/1852	231/9983	0.000641693	0.029831	0.0280764	Seita.1G034600/Seita.1G053800/Seita.1G064700/Seita.1G067400/Seita.1G185100/Seita.1G188700/Seita.1G239600/Seita.1G253100/Seita.1G257600/Seita.1G309100/Seita.2G013400/Seita.2G156100/Seita.2G156200/Seita.2G179700/Seita.2G179800/Seita.2G195200/Seita.2G206000/Seita.2G269700/Seita.2G291300/Seita.3G007200/Seita.3G062400/Seita.3G139200/Seita.3G170100/Seita.3G205500/Seita.3G237600/Seita.3G282000/Seita.3G2…	63		Ci409up	BP	GO:1900140	regulation of seedling development	6/96	84/9983	0.000150127	0.0087651	0.00846059	Seita.1G335200/Seita.2G053800/Seita.3G139000/Seita.3G193800/Seita.4G143700/Seita.8G118200	6		Ci134up	BP	GO:0005975	carbohydrate metabolic process	39/446	474/9983	0.000155818	0.0330567	0.0311479	Seita.1G080900/Seita.1G127500/Seita.1G294300/Seita.2G003000/Seita.2G081000/Seita.2G168000/Seita.2G209100/Seita.2G262300/Seita.2G351400/Seita.2G384400/Seita.3G109600/Seita.3G217800/Seita.3G275400/Seita.4G099300/Seita.4G101200/Seita.4G239800/Seita.5G069500/Seita.5G134800/Seita.5G237300/Seita.5G319100/Seita.5G377200/Seita.7G132000/Seita.7G192300/Seita.7G230800/Seita.8G005700/Seita.9G021900/Seita.9G0…	39
Ci328DEG	BP	GO:0006855	drug transmembrane transport	36/1852	115/9983	0.000646608	0.029831	0.0280764	Seita.1G270500/Seita.2G001400/Seita.2G026700/Seita.2G278500/Seita.2G324100/Seita.2G335300/Seita.2G360800/Seita.3G356700/Seita.3G357100/Seita.3G357700/Seita.4G006500/Seita.4G006600/Seita.4G145400/Seita.4G273500/Seita.5G015100/Seita.5G048000/Seita.5G124100/Seita.5G274100/Seita.5G302300/Seita.5G333300/Seita.6G185600/Seita.6G186200/Seita.7G039700/Seita.7G039900/Seita.7G043900/Seita.7G064100/Seita.7G2…	36		Ci409up	BP	GO:0044743	protein transmembrane import into intracellular organelle	5/96	55/9983	0.000176138	0.00954922	0.00921747	Seita.2G287200/Seita.5G011800/Seita.5G012100/Seita.5G026800/Seita.9G431100	5		Ci134up	BP	GO:0071731	response to nitric oxide	6/446	20/9983	0.00017446	0.0330567	0.0311479	Seita.1G210300/Seita.1G335200/Seita.2G219700/Seita.5G414600/Seita.7G126300/Seita.7G220500	6
Ci328DEG	BP	GO:0009608	response to symbiont	13/1852	28/9983	0.000681929	0.0308669	0.0290514	Seita.1G334700/Seita.2G132500/Seita.2G269700/Seita.3G060800/Seita.3G197500/Seita.4G186200/Seita.5G008900/Seita.5G280500/Seita.6G153100/Seita.6G178500/Seita.9G118600/Seita.9G198800/Seita.9G486000	13		Ci409up	BP	GO:0071806	protein transmembrane transport	6/96	88/9983	0.000194076	0.00982023	0.00947907	Seita.2G241600/Seita.2G287200/Seita.5G011800/Seita.5G012100/Seita.5G026800/Seita.9G431100	6		Ci134up	BP	GO:0097366	response to bronchodilator	6/446	20/9983	0.00017446	0.0330567	0.0311479	Seita.1G210300/Seita.1G335200/Seita.2G219700/Seita.5G414600/Seita.7G126300/Seita.7G220500	6
Ci328DEG	BP	GO:0003333	amino acid transmembrane transport	23/1852	64/9983	0.000745446	0.032515	0.0306025	Seita.1G268000/Seita.1G286600/Seita.1G333100/Seita.2G026700/Seita.2G090200/Seita.3G127900/Seita.4G006500/Seita.4G006600/Seita.4G208500/Seita.5G015100/Seita.5G026800/Seita.5G230200/Seita.5G365100/Seita.5G387200/Seita.7G037100/Seita.7G058800/Seita.7G058900/Seita.7G102400/Seita.9G288200/Seita.9G311800/Seita.9G388900/Seita.9G389000/Seita.9G431100	23		Ci409up	BP	GO:0006626	protein targeting to mitochondrion	4/96	47/9983	0.00104369	0.0416926	0.0402441	Seita.5G011800/Seita.5G012100/Seita.5G026800/Seita.9G431100	4		Ci134up	BP	GO:0006979	response to oxidative stress	33/446	380/9983	0.000187682	0.0330567	0.0311479	Seita.1G012200/Seita.1G044800/Seita.1G063600/Seita.1G123800/Seita.1G193500/Seita.1G209000/Seita.1G210300/Seita.1G272900/Seita.1G335200/Seita.2G081000/Seita.2G219700/Seita.3G145000/Seita.3G175700/Seita.3G402100/Seita.5G284300/Seita.5G342100/Seita.5G393400/Seita.5G414600/Seita.5G456800/Seita.6G036000/Seita.7G023900/Seita.7G098700/Seita.7G102200/Seita.7G122100/Seita.7G126300/Seita.7G168700/Seita.7G2…	33
Ci328DEG	BP	GO:0006865	amino acid transport	23/1852	64/9983	0.000745446	0.032515	0.0306025	Seita.1G268000/Seita.1G286600/Seita.1G333100/Seita.2G026700/Seita.2G090200/Seita.3G127900/Seita.4G006500/Seita.4G006600/Seita.4G208500/Seita.5G015100/Seita.5G026800/Seita.5G230200/Seita.5G365100/Seita.5G387200/Seita.7G037100/Seita.7G058800/Seita.7G058900/Seita.7G102400/Seita.9G288200/Seita.9G311800/Seita.9G388900/Seita.9G389000/Seita.9G431100	23		Ci409up	BP	GO:0070585	protein localization to mitochondrion	4/96	47/9983	0.00104369	0.0416926	0.0402441	Seita.5G011800/Seita.5G012100/Seita.5G026800/Seita.9G431100	4		Ci134up	BP	GO:0006626	protein targeting to mitochondrion	9/446	47/9983	0.000195834	0.0330567	0.0311479	Seita.5G011600/Seita.5G011800/Seita.5G012100/Seita.5G026800/Seita.5G231900/Seita.5G469400/Seita.7G228300/Seita.9G431100/Seita.9G543300	9
Ci328DEG	BP	GO:1905622	negative regulation of leaf development	9/1852	16/9983	0.000827374	0.0350112	0.0329519	Seita.1G315600/Seita.2G072100/Seita.3G287100/Seita.4G105900/Seita.4G106300/Seita.9G048700/Seita.9G069700/Seita.9G123000/Seita.9G132100	9		Ci409up	BP	GO:0072655	establishment of protein localization to mitochondrion	4/96	47/9983	0.00104369	0.0416926	0.0402441	Seita.5G011800/Seita.5G012100/Seita.5G026800/Seita.9G431100	4		Ci134up	BP	GO:0070585	protein localization to mitochondrion	9/446	47/9983	0.000195834	0.0330567	0.0311479	Seita.5G011600/Seita.5G011800/Seita.5G012100/Seita.5G026800/Seita.5G231900/Seita.5G469400/Seita.7G228300/Seita.9G431100/Seita.9G543300	9
Ci328DEG	BP	GO:0008202	steroid metabolic process	32/1852	100/9983	0.000831862	0.0350112	0.0329519	Seita.1G150500/Seita.1G166600/Seita.1G362600/Seita.1G373300/Seita.2G079200/Seita.2G229900/Seita.2G231300/Seita.2G257000/Seita.2G413200/Seita.3G116300/Seita.4G224700/Seita.5G068300/Seita.5G139200/Seita.6G011100/Seita.6G089500/Seita.7G132100/Seita.7G140400/Seita.7G204200/Seita.7G318000/Seita.8G014200/Seita.8G027000/Seita.8G041200/Seita.8G136000/Seita.8G136400/Seita.8G166500/Seita.9G021400/Seita.9G0…	32		Ci409up	BP	GO:1990542	mitochondrial transmembrane transport	4/96	47/9983	0.00104369	0.0416926	0.0402441	Seita.5G011800/Seita.5G012100/Seita.5G026800/Seita.9G431100	4		Ci134up	BP	GO:0072655	establishment of protein localization to mitochondrion	9/446	47/9983	0.000195834	0.0330567	0.0311479	Seita.5G011600/Seita.5G011800/Seita.5G012100/Seita.5G026800/Seita.5G231900/Seita.5G469400/Seita.7G228300/Seita.9G431100/Seita.9G543300	9
Ci328DEG	BP	GO:0006633	fatty acid biosynthetic process	29/1852	88/9983	0.000847225	0.035043	0.0329818	Seita.1G106400/Seita.1G195100/Seita.1G219200/Seita.1G304800/Seita.2G190100/Seita.2G290900/Seita.2G389400/Seita.3G346000/Seita.3G391300/Seita.4G078000/Seita.4G078100/Seita.4G078200/Seita.4G190800/Seita.5G130200/Seita.6G113700/Seita.6G164700/Seita.6G240000/Seita.7G030200/Seita.7G162900/Seita.7G163500/Seita.8G041200/Seita.9G004800/Seita.9G126700/Seita.9G156800/Seita.9G205600/Seita.9G205700/Seita.9G2…	29		Ci409up	BP	GO:0010431	seed maturation	4/96	49/9983	0.00122174	0.0452602	0.0436879	Seita.2G035400/Seita.2G406500/Seita.3G139000/Seita.9G410800	4		Ci134up	BP	GO:0009808	lignin metabolic process	10/446	58/9983	0.000217021	0.0333029	0.0313798	Seita.1G057300/Seita.3G077100/Seita.4G048300/Seita.4G289300/Seita.5G239700/Seita.7G168700/Seita.7G220500/Seita.7G234000/Seita.8G153700/Seita.8G252500	10
Ci328DEG	BP	GO:0008299	isoprenoid biosynthetic process	45/1852	155/9983	0.000917657	0.0373129	0.0351182	Seita.1G021400/Seita.1G181900/Seita.1G367300/Seita.2G000900/Seita.2G104900/Seita.2G144900/Seita.2G187800/Seita.2G187900/Seita.2G257000/Seita.2G300900/Seita.2G303000/Seita.2G368100/Seita.2G390100/Seita.2G400600/Seita.3G015800/Seita.3G245500/Seita.4G021600/Seita.4G101100/Seita.4G235500/Seita.4G235600/Seita.5G065300/Seita.5G071800/Seita.5G285200/Seita.5G315800/Seita.5G323400/Seita.5G404900/Seita.5G4…	45		Ci409up	BP	GO:0042542	response to hydrogen peroxide	5/96	85/9983	0.00132395	0.0452602	0.0436879	Seita.1G012200/Seita.1G045200/Seita.3G175700/Seita.5G092400/Seita.9G488400	5		Ci134up	BP	GO:1902170	cellular response to reactive nitrogen species	7/446	30/9983	0.000281808	0.0366486	0.0345323	Seita.1G115800/Seita.1G116100/Seita.1G257200/Seita.1G335200/Seita.2G219700/Seita.5G414600/Seita.7G220500	7
Ci328DEG	BP	GO:0009312	oligosaccharide biosynthetic process	15/1852	36/9983	0.00109062	0.0436068	0.0410419	Seita.1G112000/Seita.1G262000/Seita.1G323700/Seita.2G188200/Seita.2G290900/Seita.2G396200/Seita.3G227500/Seita.3G346000/Seita.4G092100/Seita.6G240000/Seita.9G004800/Seita.9G069700/Seita.9G317500/Seita.9G328900/Seita.9G458800	15		Ci409up	BP	GO:0009738	abscisic acid-activated signaling pathway	8/96	223/9983	0.00134128	0.0452602	0.0436879	Seita.2G271700/Seita.3G139000/Seita.3G160800/Seita.3G164700/Seita.3G193800/Seita.5G393800/Seita.9G198800/Seita.9G460200	8		Ci134up	BP	GO:0009698	phenylpropanoid metabolic process	15/446	120/9983	0.000282247	0.0366486	0.0345323	Seita.1G057300/Seita.1G065800/Seita.3G077100/Seita.4G048300/Seita.4G096400/Seita.4G289300/Seita.5G069500/Seita.5G239700/Seita.7G168700/Seita.7G220500/Seita.7G234000/Seita.8G153700/Seita.8G252500/Seita.9G214500/Seita.9G545600	15
Ci328DEG	BP	GO:0007568	aging	56/1852	205/9983	0.00119771	0.0466352	0.0438922	Seita.1G166500/Seita.1G278500/Seita.1G315600/Seita.1G362600/Seita.2G013500/Seita.2G072100/Seita.2G179700/Seita.2G179800/Seita.2G300900/Seita.2G309200/Seita.2G387600/Seita.2G436000/Seita.2G436400/Seita.2G441700/Seita.3G008300/Seita.3G160800/Seita.3G287100/Seita.3G379400/Seita.4G017200/Seita.4G054000/Seita.4G054900/Seita.4G067200/Seita.4G105900/Seita.4G106300/Seita.4G155100/Seita.4G247100/Seita.5G0…	56		Ci409up	BP	GO:0017038	protein import	6/96	127/9983	0.00137152	0.0452602	0.0436879	Seita.2G241600/Seita.2G287200/Seita.5G011800/Seita.5G012100/Seita.5G026800/Seita.9G431100	6		Ci134up	BP	GO:0009845	seed germination	19/446	176/9983	0.000321262	0.038735	0.0364983	Seita.1G209000/Seita.1G335200/Seita.2G053300/Seita.2G053700/Seita.2G053800/Seita.2G156300/Seita.2G193000/Seita.2G302100/Seita.3G139000/Seita.3G193800/Seita.3G402100/Seita.4G143700/Seita.4G159500/Seita.5G164400/Seita.5G351300/Seita.6G123500/Seita.7G212900/Seita.9G012400/Seita.9G460200	19
Ci328DEG	BP	GO:0019725	cellular homeostasis	51/1852	183/9983	0.00120658	0.0466352	0.0438922	Seita.1G130300/Seita.1G169800/Seita.1G231200/Seita.1G274100/Seita.1G379500/Seita.2G159000/Seita.2G197500/Seita.2G426200/Seita.3G030500/Seita.3G049900/Seita.3G051000/Seita.3G089400/Seita.3G099600/Seita.3G109600/Seita.3G166700/Seita.3G215300/Seita.3G333100/Seita.4G138500/Seita.4G159500/Seita.4G175000/Seita.5G085100/Seita.5G103100/Seita.5G124100/Seita.5G134800/Seita.5G232500/Seita.5G270400/Seita.5G3…	51		Ci134down	BP	GO:0009834	plant-type secondary cell wall biogenesis	21/454	73/9983	4.97982e-12	7.69881e-09	7.3649e-09	Seita.1G080900/Seita.1G116500/Seita.2G209100/Seita.3G046000/Seita.3G132100/Seita.3G136800/Seita.3G158400/Seita.3G158500/Seita.3G217800/Seita.3G235400/Seita.3G350800/Seita.5G242700/Seita.5G319100/Seita.5G363400/Seita.5G437300/Seita.7G220500/Seita.7G264400/Seita.7G272500/Seita.8G252500/Seita.9G425900/Seita.9G560500	21		Ci134up	BP	GO:0016051	carbohydrate biosynthetic process	22/446	223/9983	0.00040261	0.045307	0.0426907	Seita.1G080900/Seita.1G127500/Seita.1G294300/Seita.2G168000/Seita.2G209100/Seita.3G217800/Seita.4G099300/Seita.4G101200/Seita.4G239800/Seita.5G069500/Seita.5G237300/Seita.5G319100/Seita.5G377200/Seita.7G192300/Seita.9G186600/Seita.9G227400/Seita.9G327500/Seita.9G381600/Seita.9G402500/Seita.9G416600/Seita.9G440600/Seita.9G460100	22
Ci328DEG	BP	GO:0006805	xenobiotic metabolic process	7/1852	11/9983	0.00122469	0.0466352	0.0438922	Seita.5G104100/Seita.8G041200/Seita.8G091300/Seita.8G153700/Seita.9G205600/Seita.9G205700/Seita.9G205800	7		Ci134down	BP	GO:0071554	cell wall organization or biogenesis	52/454	409/9983	9.9777e-12	7.71276e-09	7.37825e-09	Seita.1G079000/Seita.1G080900/Seita.1G112800/Seita.1G116500/Seita.2G044900/Seita.2G209100/Seita.2G347700/Seita.2G382900/Seita.2G404000/Seita.2G439200/Seita.3G046000/Seita.3G132100/Seita.3G136800/Seita.3G158400/Seita.3G158500/Seita.3G217800/Seita.3G235400/Seita.3G347500/Seita.3G350800/Seita.4G181500/Seita.4G259700/Seita.5G053000/Seita.5G242700/Seita.5G246600/Seita.5G319100/Seita.5G363400/Seita.5G4…	52		Ci134up	CC	GO:0031225	anchored component of membrane	17/417	142/9955	8.82671e-05	0.0121485	0.0113149	Seita.1G159600/Seita.2G199500/Seita.2G292400/Seita.3G008300/Seita.3G102200/Seita.3G315000/Seita.5G122100/Seita.5G263600/Seita.5G357100/Seita.5G448500/Seita.6G003500/Seita.6G113100/Seita.9G060800/Seita.9G112400/Seita.9G145500/Seita.9G373900/Seita.J002600	17
Ci328DEG	CC	GO:0031226	intrinsic component of plasma membrane	109/1735	331/9955	2.61989e-12	8.25266e-10	8.05272e-10	Seita.1G127700/Seita.1G135500/Seita.1G159600/Seita.1G213900/Seita.1G256300/Seita.1G259900/Seita.1G286600/Seita.1G333100/Seita.1G372300/Seita.2G044900/Seita.2G049100/Seita.2G071100/Seita.2G115800/Seita.2G115900/Seita.2G154700/Seita.2G166600/Seita.2G211200/Seita.2G250200/Seita.2G263300/Seita.2G298100/Seita.2G412000/Seita.3G005500/Seita.3G008300/Seita.3G043400/Seita.3G076900/Seita.3G146800/Seita.3G1…	109		Ci134down	BP	GO:0045492	xylan biosynthetic process	13/454	31/9983	2.92641e-10	1.31372e-07	1.25674e-07	Seita.1G080900/Seita.3G046000/Seita.3G132100/Seita.3G158400/Seita.3G158500/Seita.3G217800/Seita.3G235400/Seita.5G437300/Seita.7G264400/Seita.9G037100/Seita.9G425900/Seita.9G440600/Seita.9G441000	13		Ci134up	CC	GO:0046658	anchored component of plasma membrane	15/417	119/9955	0.000127209	0.0121485	0.0113149	Seita.1G159600/Seita.2G199500/Seita.2G292400/Seita.3G008300/Seita.3G315000/Seita.5G263600/Seita.5G357100/Seita.5G448500/Seita.6G003500/Seita.6G113100/Seita.9G060800/Seita.9G112400/Seita.9G145500/Seita.9G373900/Seita.J002600	15
Ci328DEG	CC	GO:0005618	cell wall	142/1735	490/9955	6.42684e-11	7.91826e-09	7.72643e-09	Seita.1G004600/Seita.1G079000/Seita.1G162600/Seita.1G162700/Seita.1G162800/Seita.1G180600/Seita.1G192800/Seita.1G210300/Seita.1G213900/Seita.1G295700/Seita.1G316400/Seita.1G316700/Seita.1G323700/Seita.1G335200/Seita.1G378600/Seita.2G027000/Seita.2G069000/Seita.2G069100/Seita.2G109700/Seita.2G133900/Seita.2G134000/Seita.2G154700/Seita.2G188200/Seita.2G193900/Seita.2G218700/Seita.2G387600/Seita.2G3…	142		Ci134down	BP	GO:0071669	plant-type cell wall organization or biogenesis	37/454	257/9983	3.5333e-10	1.31372e-07	1.25674e-07	Seita.1G079000/Seita.1G080900/Seita.1G116500/Seita.2G044900/Seita.2G209100/Seita.2G347700/Seita.2G382900/Seita.3G046000/Seita.3G132100/Seita.3G136800/Seita.3G158400/Seita.3G158500/Seita.3G217800/Seita.3G235400/Seita.3G347500/Seita.3G350800/Seita.4G259700/Seita.5G242700/Seita.5G319100/Seita.5G363400/Seita.5G437300/Seita.7G220500/Seita.7G264400/Seita.7G272500/Seita.8G100100/Seita.8G128800/Seita.8G2…	37		Ci134up	CC	GO:0005741	mitochondrial outer membrane	7/417	32/9955	0.000291427	0.0185542	0.0172811	Seita.2G442900/Seita.5G011600/Seita.5G011800/Seita.5G012100/Seita.5G231900/Seita.7G305300/Seita.8G009400	7
Ci328DEG	CC	GO:0030312	external encapsulating structure	142/1735	491/9955	7.5412e-11	7.91826e-09	7.72643e-09	Seita.1G004600/Seita.1G079000/Seita.1G162600/Seita.1G162700/Seita.1G162800/Seita.1G180600/Seita.1G192800/Seita.1G210300/Seita.1G213900/Seita.1G295700/Seita.1G316400/Seita.1G316700/Seita.1G323700/Seita.1G335200/Seita.1G378600/Seita.2G027000/Seita.2G069000/Seita.2G069100/Seita.2G109700/Seita.2G133900/Seita.2G134000/Seita.2G154700/Seita.2G188200/Seita.2G193900/Seita.2G218700/Seita.2G387600/Seita.2G3…	142		Ci134down	BP	GO:0045491	xylan metabolic process	16/454	51/9983	4.24876e-10	1.31372e-07	1.25674e-07	Seita.1G080900/Seita.2G439200/Seita.3G046000/Seita.3G132100/Seita.3G158400/Seita.3G158500/Seita.3G217800/Seita.3G235400/Seita.5G437300/Seita.7G257800/Seita.7G264400/Seita.8G081100/Seita.9G037100/Seita.9G425900/Seita.9G440600/Seita.9G441000	16		Ci134up	CC	GO:0031226	intrinsic component of plasma membrane	27/417	331/9955	0.000698229	0.0333404	0.0310528	Seita.1G135500/Seita.1G135700/Seita.1G159600/Seita.2G199500/Seita.2G291500/Seita.2G292400/Seita.3G008300/Seita.3G082100/Seita.3G315000/Seita.5G096100/Seita.5G218600/Seita.5G263600/Seita.5G357100/Seita.5G448500/Seita.6G003500/Seita.6G113100/Seita.7G033300/Seita.7G102400/Seita.7G199400/Seita.7G228200/Seita.9G060800/Seita.9G112400/Seita.9G145500/Seita.9G373900/Seita.9G410000/Seita.9G506300/Seita.J00…	27
Ci328DEG	CC	GO:0031012	extracellular matrix	18/1735	24/9955	9.43432e-10	7.42953e-08	7.24953e-08	Seita.1G094700/Seita.1G162600/Seita.1G162700/Seita.1G162800/Seita.6G037400/Seita.6G037500/Seita.6G038100/Seita.6G038200/Seita.6G038300/Seita.6G038400/Seita.6G038500/Seita.6G038600/Seita.6G038700/Seita.6G038800/Seita.6G039000/Seita.6G039100/Seita.6G039200/Seita.9G463100	18		Ci134down	BP	GO:0042546	cell wall biogenesis	29/454	180/9983	2.21157e-09	5.69849e-07	5.45134e-07	Seita.1G080900/Seita.1G116500/Seita.2G209100/Seita.2G382900/Seita.3G046000/Seita.3G132100/Seita.3G136800/Seita.3G158400/Seita.3G158500/Seita.3G217800/Seita.3G235400/Seita.3G350800/Seita.5G242700/Seita.5G319100/Seita.5G363400/Seita.5G437300/Seita.7G220500/Seita.7G264400/Seita.7G272500/Seita.8G128800/Seita.8G252500/Seita.9G037100/Seita.9G425900/Seita.9G434100/Seita.9G440600/Seita.9G441000/Seita.9G4…	29		Ci134up	MF	GO:0016151	nickel cation binding	5/387	10/8539	3.88853e-05	0.00808407	0.00762049	Seita.5G166200/Seita.5G166300/Seita.6G036000/Seita.8G115200/Seita.8G115400	5
Ci328DEG	CC	GO:0031225	anchored component of membrane	53/1735	142/9955	1.0644e-08	6.70571e-07	6.54325e-07	Seita.1G127700/Seita.1G159600/Seita.1G213900/Seita.1G256300/Seita.1G315600/Seita.2G044900/Seita.2G071100/Seita.2G154700/Seita.2G250200/Seita.2G263300/Seita.2G298100/Seita.2G412000/Seita.3G008300/Seita.3G102200/Seita.3G146800/Seita.3G225200/Seita.3G263500/Seita.3G263800/Seita.3G315000/Seita.4G105900/Seita.4G106300/Seita.4G169700/Seita.4G205300/Seita.4G253700/Seita.5G263600/Seita.5G328200/Seita.5G3…	53		Ci134down	BP	GO:0009832	plant-type cell wall biogenesis	25/454	147/9983	9.39916e-09	2.07587e-06	1.98584e-06	Seita.1G080900/Seita.1G116500/Seita.2G209100/Seita.2G382900/Seita.3G046000/Seita.3G132100/Seita.3G136800/Seita.3G158400/Seita.3G158500/Seita.3G217800/Seita.3G235400/Seita.3G350800/Seita.5G242700/Seita.5G319100/Seita.5G363400/Seita.5G437300/Seita.7G220500/Seita.7G264400/Seita.7G272500/Seita.8G128800/Seita.8G252500/Seita.9G425900/Seita.9G434100/Seita.9G494200/Seita.9G560500	25		Ci134up	MF	GO:0004252	serine-type endopeptidase activity	8/387	30/8539	4.02193e-05	0.00808407	0.00762049	Seita.2G218700/Seita.4G242700/Seita.5G285700/Seita.5G332300/Seita.7G206300/Seita.9G253700/Seita.9G349500/Seita.9G567800	8
Ci328DEG	CC	GO:0046658	anchored component of plasma membrane	44/1735	119/9955	2.5511e-07	1.33933e-05	1.30688e-05	Seita.1G127700/Seita.1G159600/Seita.1G213900/Seita.1G256300/Seita.2G044900/Seita.2G071100/Seita.2G154700/Seita.2G250200/Seita.2G263300/Seita.2G298100/Seita.2G412000/Seita.3G008300/Seita.3G146800/Seita.3G225200/Seita.3G263500/Seita.3G263800/Seita.3G315000/Seita.4G169700/Seita.5G263600/Seita.5G328200/Seita.5G343700/Seita.5G392200/Seita.5G448000/Seita.5G448400/Seita.5G450000/Seita.6G101500/Seita.6G1…	44		Ci134down	BP	GO:0010383	cell wall polysaccharide metabolic process	21/454	112/9983	2.51597e-08	4.86211e-06	4.65123e-06	Seita.1G080900/Seita.2G209100/Seita.2G439200/Seita.3G046000/Seita.3G132100/Seita.3G158400/Seita.3G158500/Seita.3G217800/Seita.3G235400/Seita.5G053000/Seita.5G437300/Seita.7G257800/Seita.7G264400/Seita.8G081100/Seita.8G128800/Seita.9G037100/Seita.9G260200/Seita.9G425900/Seita.9G440600/Seita.9G441000/Seita.9G494200	21		Ci603up	BP	GO:1900057	positive regulation of leaf senescence	9/616	28/9983	2.92201e-05	0.0210518	0.0205864	Seita.1G209000/Seita.2G436400/Seita.3G160800/Seita.4G226200/Seita.5G126200/Seita.5G284300/Seita.9G097300/Seita.9G162900/Seita.9G521900	9
Ci328DEG	CC	GO:0009505	plant-type cell wall	68/1735	220/9955	5.48196e-07	2.46688e-05	2.40711e-05	Seita.1G004600/Seita.1G079000/Seita.1G192800/Seita.1G210300/Seita.1G213900/Seita.1G316700/Seita.2G027000/Seita.2G069000/Seita.2G069100/Seita.2G218700/Seita.3G071200/Seita.3G071400/Seita.3G071500/Seita.3G101400/Seita.3G146800/Seita.3G162000/Seita.3G190400/Seita.3G202900/Seita.3G240700/Seita.3G270300/Seita.4G021600/Seita.4G105100/Seita.4G169700/Seita.4G255800/Seita.4G259700/Seita.4G271100/Seita.5G0…	68		Ci134down	BP	GO:0044036	cell wall macromolecule metabolic process	22/454	125/9983	3.88818e-08	6.67903e-06	6.38935e-06	Seita.1G080900/Seita.2G209100/Seita.2G439200/Seita.3G046000/Seita.3G132100/Seita.3G158400/Seita.3G158500/Seita.3G217800/Seita.3G235400/Seita.5G053000/Seita.5G437300/Seita.7G257800/Seita.7G264400/Seita.8G081100/Seita.8G128800/Seita.9G037100/Seita.9G260200/Seita.9G425900/Seita.9G440600/Seita.9G441000/Seita.9G494200/Seita.9G573900	22		Ci603up	BP	GO:0009834	plant-type secondary cell wall biogenesis	15/616	73/9983	3.08495e-05	0.0210518	0.0205864	Seita.1G080900/Seita.1G309600/Seita.2G200100/Seita.2G200200/Seita.2G209100/Seita.3G217800/Seita.4G289300/Seita.5G242700/Seita.5G319100/Seita.6G154200/Seita.7G010400/Seita.7G264400/Seita.8G252500/Seita.9G227400/Seita.9G560500	15
Ci328DEG	CC	GO:0005576	extracellular region	104/1735	384/9955	1.00586e-06	3.87707e-05	3.78314e-05	Seita.1G002800/Seita.1G094700/Seita.1G112000/Seita.1G116400/Seita.1G162600/Seita.1G162700/Seita.1G162800/Seita.1G170500/Seita.1G244200/Seita.1G295700/Seita.1G323700/Seita.1G324300/Seita.1G331300/Seita.1G332000/Seita.1G349200/Seita.2G033500/Seita.2G044900/Seita.2G109700/Seita.2G156300/Seita.2G168000/Seita.2G178900/Seita.2G188200/Seita.2G288700/Seita.2G396200/Seita.2G401000/Seita.3G011400/Seita.3G0…	104		Ci134down	BP	GO:0010410	hemicellulose metabolic process	17/454	77/9983	4.43613e-08	6.85826e-06	6.56081e-06	Seita.1G080900/Seita.2G439200/Seita.3G046000/Seita.3G132100/Seita.3G158400/Seita.3G158500/Seita.3G217800/Seita.3G235400/Seita.5G437300/Seita.7G257800/Seita.7G264400/Seita.8G081100/Seita.9G037100/Seita.9G260200/Seita.9G425900/Seita.9G440600/Seita.9G441000	17		Ci603up	BP	GO:1905623	positive regulation of leaf development	9/616	29/9983	4.00726e-05	0.0210518	0.0205864	Seita.1G209000/Seita.2G436400/Seita.3G160800/Seita.4G226200/Seita.5G126200/Seita.5G284300/Seita.9G097300/Seita.9G162900/Seita.9G521900	9
Ci328DEG	CC	GO:0005887	integral component of plasma membrane	65/1735	211/9955	1.10773e-06	3.87707e-05	3.78314e-05	Seita.1G135500/Seita.1G259900/Seita.1G286600/Seita.1G333100/Seita.1G372300/Seita.2G049100/Seita.2G115800/Seita.2G115900/Seita.2G166600/Seita.2G211200/Seita.3G005500/Seita.3G043400/Seita.3G076900/Seita.3G193100/Seita.3G233000/Seita.3G244500/Seita.3G319200/Seita.3G333100/Seita.4G006500/Seita.4G006600/Seita.4G015100/Seita.4G051900/Seita.4G098700/Seita.4G140700/Seita.4G180100/Seita.4G257500/Seita.4G2…	65		Ci134down	BP	GO:0044038	cell wall macromolecule biosynthetic process	15/454	64/9983	1.19519e-07	1.42136e-05	1.35971e-05	Seita.1G080900/Seita.3G046000/Seita.3G132100/Seita.3G158400/Seita.3G158500/Seita.3G217800/Seita.3G235400/Seita.5G437300/Seita.7G264400/Seita.8G128800/Seita.9G037100/Seita.9G425900/Seita.9G440600/Seita.9G441000/Seita.9G494200	15		Ci603up	BP	GO:0009415	response to water	41/616	347/9983	4.21036e-05	0.0210518	0.0205864	Seita.1G267200/Seita.1G324300/Seita.1G331600/Seita.2G035400/Seita.2G142500/Seita.2G218400/Seita.2G284000/Seita.2G404700/Seita.2G420700/Seita.2G436000/Seita.3G144000/Seita.3G193800/Seita.3G242400/Seita.3G282000/Seita.4G082000/Seita.4G092200/Seita.5G319100/Seita.5G351300/Seita.5G393800/Seita.6G073100/Seita.6G151500/Seita.7G040200/Seita.7G116800/Seita.7G127300/Seita.7G168700/Seita.7G184600/Seita.7G2…	41
Ci328DEG	CC	GO:0000325	plant-type vacuole	60/1735	214/9955	6.76145e-05	0.00212986	0.00207826	Seita.1G004600/Seita.1G028000/Seita.1G115700/Seita.1G115800/Seita.1G162600/Seita.1G162700/Seita.1G162800/Seita.1G192800/Seita.1G252200/Seita.1G259900/Seita.1G271500/Seita.2G352700/Seita.2G412200/Seita.2G426700/Seita.3G049900/Seita.3G193100/Seita.3G375800/Seita.4G047900/Seita.4G155100/Seita.4G185000/Seita.5G007400/Seita.5G176800/Seita.5G185300/Seita.5G198500/Seita.5G340800/Seita.6G001600/Seita.6G0…	60		Ci134down	BP	GO:0070589	cellular component macromolecule biosynthetic process	15/454	64/9983	1.19519e-07	1.42136e-05	1.35971e-05	Seita.1G080900/Seita.3G046000/Seita.3G132100/Seita.3G158400/Seita.3G158500/Seita.3G217800/Seita.3G235400/Seita.5G437300/Seita.7G264400/Seita.8G128800/Seita.9G037100/Seita.9G425900/Seita.9G440600/Seita.9G441000/Seita.9G494200	15		Ci603up	BP	GO:0009414	response to water deprivation	39/616	340/9983	0.000123085	0.0492338	0.0481455	Seita.1G267200/Seita.1G324300/Seita.1G331600/Seita.2G035400/Seita.2G142500/Seita.2G218400/Seita.2G284000/Seita.2G404700/Seita.2G420700/Seita.3G144000/Seita.3G193800/Seita.3G242400/Seita.3G282000/Seita.4G082000/Seita.4G092200/Seita.5G319100/Seita.5G351300/Seita.5G393800/Seita.6G073100/Seita.6G151500/Seita.7G040200/Seita.7G116800/Seita.7G127300/Seita.7G168700/Seita.7G184600/Seita.7G228200/Seita.7G2…	39
Ci328DEG	CC	GO:0048046	apoplast	58/1735	226/9955	0.00106361	0.0304579	0.0297199	Seita.1G170500/Seita.1G244200/Seita.1G324300/Seita.1G331300/Seita.1G349200/Seita.2G033500/Seita.2G044900/Seita.2G109700/Seita.2G168000/Seita.2G178900/Seita.2G401000/Seita.3G011400/Seita.3G060800/Seita.3G187400/Seita.3G263500/Seita.3G263800/Seita.3G315000/Seita.4G191200/Seita.4G205300/Seita.4G245500/Seita.4G253700/Seita.4G267900/Seita.4G276800/Seita.5G014300/Seita.5G185300/Seita.5G240100/Seita.5G3…	58		Ci134down	BP	GO:0070592	cell wall polysaccharide biosynthetic process	15/454	64/9983	1.19519e-07	1.42136e-05	1.35971e-05	Seita.1G080900/Seita.3G046000/Seita.3G132100/Seita.3G158400/Seita.3G158500/Seita.3G217800/Seita.3G235400/Seita.5G437300/Seita.7G264400/Seita.8G128800/Seita.9G037100/Seita.9G425900/Seita.9G440600/Seita.9G441000/Seita.9G494200	15		Ci328up	BP	GO:0009644	response to high light intensity	21/610	80/9983	7.63932e-09	1.05879e-05	1.03876e-05	Seita.1G012200/Seita.1G123800/Seita.1G257600/Seita.2G046600/Seita.2G053300/Seita.2G053700/Seita.2G053800/Seita.2G164500/Seita.3G130700/Seita.3G175700/Seita.4G099200/Seita.5G014300/Seita.5G092400/Seita.5G207000/Seita.5G315500/Seita.7G113700/Seita.9G272800/Seita.9G424800/Seita.9G457400/Seita.9G488400/Seita.9G508400	21
Ci328DEG	MF	GO:0004497	monooxygenase activity	62/1621	167/8539	2.29767e-08	1.31657e-05	1.13674e-05	Seita.1G019400/Seita.1G166600/Seita.1G253000/Seita.1G265100/Seita.1G367300/Seita.1G373300/Seita.2G107500/Seita.2G145700/Seita.2G145800/Seita.2G145900/Seita.2G201000/Seita.2G219700/Seita.2G229900/Seita.2G283800/Seita.2G404300/Seita.2G404400/Seita.2G413200/Seita.3G116300/Seita.3G298400/Seita.3G339800/Seita.4G036200/Seita.4G145700/Seita.4G216300/Seita.4G224700/Seita.4G235500/Seita.4G235600/Seita.4G2…	62		Ci134down	BP	GO:0009699	phenylpropanoid biosynthetic process	18/454	99/9983	4.09611e-07	4.52328e-05	4.32709e-05	Seita.1G230100/Seita.3G142500/Seita.3G194300/Seita.3G218600/Seita.3G394400/Seita.4G181500/Seita.4G191500/Seita.5G053000/Seita.5G386300/Seita.6G055900/Seita.6G093400/Seita.6G244100/Seita.7G155700/Seita.7G220500/Seita.8G126500/Seita.8G128800/Seita.8G252500/Seita.9G214500	18		Ci328up	BP	GO:0009408	response to heat	35/610	199/9983	1.09041e-08	1.05879e-05	1.03876e-05	Seita.1G012200/Seita.1G162500/Seita.1G177700/Seita.1G324300/Seita.1G326600/Seita.1G342400/Seita.2G053300/Seita.2G053700/Seita.2G053800/Seita.2G229700/Seita.2G241600/Seita.2G284200/Seita.3G175700/Seita.4G089700/Seita.4G111400/Seita.4G227700/Seita.5G092400/Seita.5G093000/Seita.5G131300/Seita.5G131400/Seita.5G207000/Seita.5G315500/Seita.5G328200/Seita.5G403700/Seita.5G448900/Seita.5G450800/Seita.7G0…	35
Ci328DEG	MF	GO:0016709	oxidoreductase activity, acting on paired donors, with incorporation or reduction of molecular oxygen, NAD(P)H as one donor, and incorporation of one atom of oxygen	38/1621	102/8539	1.08428e-05	0.0021488	0.0018553	Seita.1G019400/Seita.1G253000/Seita.2G107500/Seita.2G145700/Seita.2G145800/Seita.2G145900/Seita.2G219700/Seita.2G229900/Seita.2G283800/Seita.3G116300/Seita.3G298400/Seita.3G339800/Seita.4G145700/Seita.4G216300/Seita.4G235500/Seita.4G235600/Seita.4G260400/Seita.5G044300/Seita.5G139200/Seita.6G023100/Seita.6G061400/Seita.6G089500/Seita.6G100500/Seita.6G132000/Seita.6G237000/Seita.7G116400/Seita.7G1…	38		Ci134down	BP	GO:0034637	cellular carbohydrate biosynthetic process	22/454	156/9983	2.06414e-06	0.000212744	0.000203517	Seita.1G080900/Seita.1G262000/Seita.1G323700/Seita.2G209100/Seita.2G396200/Seita.3G046000/Seita.3G132100/Seita.3G158400/Seita.3G158500/Seita.3G217800/Seita.3G235400/Seita.5G319100/Seita.5G437300/Seita.6G094400/Seita.6G141700/Seita.7G264400/Seita.8G128800/Seita.9G037100/Seita.9G425900/Seita.9G440600/Seita.9G441000/Seita.9G494200	22		Ci328up	BP	GO:0009415	response to water	48/610	347/9983	6.89022e-08	3.46532e-05	3.39977e-05	Seita.1G081400/Seita.1G161800/Seita.1G177700/Seita.1G267200/Seita.1G319600/Seita.1G324300/Seita.2G132500/Seita.2G142500/Seita.2G164500/Seita.2G241600/Seita.2G284000/Seita.2G436000/Seita.3G144000/Seita.3G162400/Seita.3G193800/Seita.4G082000/Seita.4G112000/Seita.4G112200/Seita.4G227700/Seita.4G259700/Seita.5G119800/Seita.5G166200/Seita.5G166300/Seita.5G393800/Seita.6G114000/Seita.6G151100/Seita.7G0…	48
Ci328DEG	MF	GO:0004553	hydrolase activity, hydrolyzing O-glycosyl compounds	70/1621	228/8539	1.12502e-05	0.0021488	0.0018553	Seita.1G004600/Seita.1G323700/Seita.2G044900/Seita.2G081000/Seita.2G188200/Seita.2G237100/Seita.2G254100/Seita.2G263300/Seita.2G279000/Seita.2G396200/Seita.3G011400/Seita.3G225200/Seita.3G240700/Seita.3G263500/Seita.3G263800/Seita.3G288600/Seita.3G315000/Seita.4G092100/Seita.4G105100/Seita.4G169700/Seita.4G191200/Seita.4G255800/Seita.5G022400/Seita.5G258600/Seita.5G316000/Seita.5G328200/Seita.5G3…	70		Ci134down	BP	GO:0009698	phenylpropanoid metabolic process	18/454	120/9983	7.30895e-06	0.00067838	0.000648958	Seita.1G230100/Seita.3G142500/Seita.3G194300/Seita.3G218600/Seita.3G394400/Seita.4G181500/Seita.4G191500/Seita.5G053000/Seita.5G386300/Seita.6G055900/Seita.6G093400/Seita.6G244100/Seita.7G155700/Seita.7G220500/Seita.8G126500/Seita.8G128800/Seita.8G252500/Seita.9G214500	18		Ci328up	BP	GO:0006979	response to oxidative stress	51/610	380/9983	7.13763e-08	3.46532e-05	3.39977e-05	Seita.1G012200/Seita.1G044800/Seita.1G063600/Seita.1G123800/Seita.1G193500/Seita.1G203000/Seita.1G210300/Seita.1G257600/Seita.1G272900/Seita.2G081000/Seita.3G060800/Seita.3G145000/Seita.3G175700/Seita.3G192300/Seita.4G021300/Seita.4G067200/Seita.4G111400/Seita.4G194200/Seita.4G222300/Seita.5G092400/Seita.5G119800/Seita.5G207000/Seita.5G284300/Seita.5G315500/Seita.5G356000/Seita.5G393400/Seita.5G4…	51
Ci328DEG	MF	GO:0008236	serine-type peptidase activity	25/1621	59/8539	2.85254e-05	0.00272417	0.00235209	Seita.1G046800/Seita.1G116400/Seita.2G069000/Seita.2G069100/Seita.2G109700/Seita.2G218700/Seita.2G246500/Seita.5G157800/Seita.5G158000/Seita.5G202300/Seita.5G285700/Seita.5G370200/Seita.7G203700/Seita.7G206300/Seita.7G269800/Seita.8G097000/Seita.8G134300/Seita.9G253700/Seita.9G262900/Seita.9G340500/Seita.9G349500/Seita.9G376900/Seita.9G377000/Seita.9G377100/Seita.9G533900	25		Ci134down	BP	GO:0010413	glucuronoxylan metabolic process	7/454	18/9983	7.89835e-06	0.00067838	0.000648958	Seita.3G046000/Seita.3G158400/Seita.3G158500/Seita.3G217800/Seita.3G235400/Seita.5G437300/Seita.7G264400	7		Ci328up	BP	GO:0009642	response to light intensity	25/610	127/9983	1.50998e-07	5.86478e-05	5.75384e-05	Seita.1G012200/Seita.1G117200/Seita.1G123800/Seita.1G257600/Seita.2G046600/Seita.2G053300/Seita.2G053700/Seita.2G053800/Seita.2G164500/Seita.2G335600/Seita.3G130700/Seita.3G175700/Seita.4G099200/Seita.4G110900/Seita.5G014300/Seita.5G092400/Seita.5G207000/Seita.5G315500/Seita.7G113700/Seita.7G220500/Seita.9G272800/Seita.9G424800/Seita.9G457400/Seita.9G488400/Seita.9G508400	25
Ci328DEG	MF	GO:0016825	hydrolase activity, acting on acid phosphorus-nitrogen bonds	25/1621	59/8539	2.85254e-05	0.00272417	0.00235209	Seita.1G046800/Seita.1G116400/Seita.2G069000/Seita.2G069100/Seita.2G109700/Seita.2G218700/Seita.2G246500/Seita.5G157800/Seita.5G158000/Seita.5G202300/Seita.5G285700/Seita.5G370200/Seita.7G203700/Seita.7G206300/Seita.7G269800/Seita.8G097000/Seita.8G134300/Seita.9G253700/Seita.9G262900/Seita.9G340500/Seita.9G349500/Seita.9G376900/Seita.9G377000/Seita.9G377100/Seita.9G533900	25		Ci134down	BP	GO:0010417	glucuronoxylan biosynthetic process	7/454	18/9983	7.89835e-06	0.00067838	0.000648958	Seita.3G046000/Seita.3G158400/Seita.3G158500/Seita.3G217800/Seita.3G235400/Seita.5G437300/Seita.7G264400	7		Ci328up	BP	GO:0009414	response to water deprivation	45/610	340/9983	6.45041e-07	0.000208778	0.000204829	Seita.1G081400/Seita.1G161800/Seita.1G177700/Seita.1G267200/Seita.1G319600/Seita.1G324300/Seita.2G132500/Seita.2G142500/Seita.2G164500/Seita.2G241600/Seita.2G284000/Seita.3G144000/Seita.3G162400/Seita.3G193800/Seita.4G082000/Seita.4G112000/Seita.4G112200/Seita.4G227700/Seita.4G259700/Seita.5G119800/Seita.5G166200/Seita.5G166300/Seita.5G393800/Seita.6G114000/Seita.6G151100/Seita.7G039700/Seita.7G0…	45
Ci328DEG	MF	GO:0017171	serine hydrolase activity	25/1621	59/8539	2.85254e-05	0.00272417	0.00235209	Seita.1G046800/Seita.1G116400/Seita.2G069000/Seita.2G069100/Seita.2G109700/Seita.2G218700/Seita.2G246500/Seita.5G157800/Seita.5G158000/Seita.5G202300/Seita.5G285700/Seita.5G370200/Seita.7G203700/Seita.7G206300/Seita.7G269800/Seita.8G097000/Seita.8G134300/Seita.9G253700/Seita.9G262900/Seita.9G340500/Seita.9G349500/Seita.9G376900/Seita.9G377000/Seita.9G377100/Seita.9G533900	25		Ci134down	BP	GO:0016051	carbohydrate biosynthetic process	26/454	223/9983	9.26779e-06	0.000754106	0.000721399	Seita.1G080900/Seita.1G262000/Seita.1G323700/Seita.1G347800/Seita.2G209100/Seita.2G263800/Seita.2G396200/Seita.3G046000/Seita.3G132100/Seita.3G158400/Seita.3G158500/Seita.3G217800/Seita.3G235400/Seita.3G346000/Seita.5G319100/Seita.5G437300/Seita.6G094400/Seita.6G141700/Seita.7G264400/Seita.8G128800/Seita.9G037100/Seita.9G425900/Seita.9G434100/Seita.9G440600/Seita.9G441000/Seita.9G494200	26		Ci328up	BP	GO:0042542	response to hydrogen peroxide	17/610	85/9983	1.18721e-05	0.00329365	0.00323135	Seita.1G012200/Seita.3G060800/Seita.3G145000/Seita.3G175700/Seita.3G192300/Seita.4G067200/Seita.5G092400/Seita.5G207000/Seita.5G315500/Seita.5G411200/Seita.8G019400/Seita.8G222300/Seita.9G424800/Seita.9G425300/Seita.9G475200/Seita.9G488400/Seita.9G508400	17
Ci328DEG	MF	GO:0016705	oxidoreductase activity, acting on paired donors, with incorporation or reduction of molecular oxygen	52/1621	162/8539	4.02128e-05	0.00329171	0.00284211	Seita.1G019400/Seita.1G253000/Seita.1G265100/Seita.2G107500/Seita.2G145700/Seita.2G145800/Seita.2G145900/Seita.2G219700/Seita.2G229900/Seita.2G283800/Seita.3G116300/Seita.3G298400/Seita.3G339800/Seita.4G015700/Seita.4G145700/Seita.4G216300/Seita.4G235500/Seita.4G235600/Seita.4G260400/Seita.5G044300/Seita.5G130200/Seita.5G139200/Seita.5G157700/Seita.5G323400/Seita.5G386300/Seita.5G404900/Seita.6G0…	52		Ci134down	BP	GO:0005975	carbohydrate metabolic process	41/454	474/9983	5.1279e-05	0.00391913	0.00374915	Seita.1G080900/Seita.1G112800/Seita.1G206800/Seita.1G262000/Seita.1G323700/Seita.1G347800/Seita.2G209100/Seita.2G263800/Seita.2G396200/Seita.2G439200/Seita.3G046000/Seita.3G132100/Seita.3G158400/Seita.3G158500/Seita.3G217800/Seita.3G235400/Seita.3G346000/Seita.4G055500/Seita.4G240700/Seita.5G002800/Seita.5G053000/Seita.5G319100/Seita.5G373800/Seita.5G437300/Seita.6G090000/Seita.6G094400/Seita.6G1…	41		Ci328up	BP	GO:0090351	seedling development	27/610	183/9983	1.66244e-05	0.00403558	0.00395924	Seita.1G252000/Seita.2G053300/Seita.2G053700/Seita.2G053800/Seita.2G169700/Seita.2G193000/Seita.2G377800/Seita.3G010200/Seita.3G139000/Seita.3G193800/Seita.4G143700/Seita.4G159500/Seita.4G238400/Seita.4G279000/Seita.4G288100/Seita.5G121900/Seita.6G123200/Seita.6G123500/Seita.6G144900/Seita.7G182600/Seita.7G212900/Seita.8G118200/Seita.8G167800/Seita.9G012400/Seita.9G289600/Seita.9G425300/Seita.9G4…	27
Ci328DEG	MF	GO:0050734	hydroxycinnamoyltransferase activity	10/1621	15/8539	6.98124e-05	0.00490863	0.00423819	Seita.1G230100/Seita.2G293600/Seita.2G293700/Seita.3G028200/Seita.5G069500/Seita.5G434700/Seita.7G047600/Seita.8G128800/Seita.9G249200/Seita.9G249300	10		Ci134down	BP	GO:0033692	cellular polysaccharide biosynthetic process	17/454	126/9983	5.32352e-05	0.00391913	0.00374915	Seita.1G080900/Seita.2G209100/Seita.3G046000/Seita.3G132100/Seita.3G158400/Seita.3G158500/Seita.3G217800/Seita.3G235400/Seita.5G319100/Seita.5G437300/Seita.7G264400/Seita.8G128800/Seita.9G037100/Seita.9G425900/Seita.9G440600/Seita.9G441000/Seita.9G494200	17		Ci328up	BP	GO:0009845	seed germination	26/610	176/9983	2.32387e-05	0.00452865	0.00444298	Seita.1G252000/Seita.2G053300/Seita.2G053700/Seita.2G053800/Seita.2G169700/Seita.2G193000/Seita.2G377800/Seita.3G010200/Seita.3G139000/Seita.3G193800/Seita.4G143700/Seita.4G159500/Seita.4G238400/Seita.4G288100/Seita.5G121900/Seita.6G123200/Seita.6G123500/Seita.6G144900/Seita.7G182600/Seita.7G212900/Seita.8G118200/Seita.8G167800/Seita.9G012400/Seita.9G289600/Seita.9G425300/Seita.9G460200	26
Ci328DEG	MF	GO:0016798	hydrolase activity, acting on glycosyl bonds	72/1621	249/8539	7.70989e-05	0.00490863	0.00423819	Seita.1G004600/Seita.1G323700/Seita.2G044900/Seita.2G081000/Seita.2G133200/Seita.2G188200/Seita.2G237100/Seita.2G254100/Seita.2G263300/Seita.2G279000/Seita.2G396200/Seita.3G011400/Seita.3G225200/Seita.3G240700/Seita.3G263500/Seita.3G263800/Seita.3G288600/Seita.3G315000/Seita.4G092100/Seita.4G105100/Seita.4G169700/Seita.4G191200/Seita.4G255800/Seita.5G022400/Seita.5G064300/Seita.5G258600/Seita.5G3…	72		Ci134down	BP	GO:0044262	cellular carbohydrate metabolic process	30/454	322/9983	0.000146788	0.0103152	0.00986781	Seita.1G080900/Seita.1G112800/Seita.1G262000/Seita.1G323700/Seita.2G209100/Seita.2G396200/Seita.2G439200/Seita.3G046000/Seita.3G132100/Seita.3G158400/Seita.3G158500/Seita.3G217800/Seita.3G235400/Seita.4G240700/Seita.5G053000/Seita.5G319100/Seita.5G437300/Seita.6G090000/Seita.6G094400/Seita.6G141700/Seita.7G257800/Seita.7G264400/Seita.8G081100/Seita.8G128800/Seita.9G037100/Seita.9G260200/Seita.9G4…	30		Ci328up	BP	GO:0000302	response to reactive oxygen species	28/610	197/9983	2.35917e-05	0.00452865	0.00444298	Seita.1G012200/Seita.1G210300/Seita.1G257600/Seita.3G060800/Seita.3G145000/Seita.3G175700/Seita.3G192300/Seita.4G067200/Seita.4G111400/Seita.5G092400/Seita.5G207000/Seita.5G315500/Seita.5G356000/Seita.5G411200/Seita.7G102200/Seita.7G113700/Seita.7G220500/Seita.8G019400/Seita.8G173800/Seita.8G222300/Seita.9G115500/Seita.9G198800/Seita.9G424800/Seita.9G425300/Seita.9G460100/Seita.9G475200/Seita.9G4…	28
Ci328DEG	MF	GO:0035251	UDP-glucosyltransferase activity	30/1621	82/8539	0.000131359	0.00752685	0.00649879	Seita.1G057100/Seita.1G245200/Seita.1G378600/Seita.3G155100/Seita.3G194500/Seita.4G041500/Seita.4G120200/Seita.4G127200/Seita.4G228200/Seita.4G271600/Seita.5G064300/Seita.5G274700/Seita.5G319100/Seita.5G402400/Seita.5G429100/Seita.6G073000/Seita.7G079000/Seita.7G139300/Seita.7G173500/Seita.7G318900/Seita.8G083400/Seita.8G091300/Seita.8G117700/Seita.8G153700/Seita.8G192500/Seita.8G203200/Seita.9G1…	30		Ci134down	BP	GO:0044264	cellular polysaccharide metabolic process	23/454	220/9983	0.000164764	0.011075	0.0105947	Seita.1G080900/Seita.1G112800/Seita.2G209100/Seita.2G439200/Seita.3G046000/Seita.3G132100/Seita.3G158400/Seita.3G158500/Seita.3G217800/Seita.3G235400/Seita.5G053000/Seita.5G319100/Seita.5G437300/Seita.7G257800/Seita.7G264400/Seita.8G081100/Seita.8G128800/Seita.9G037100/Seita.9G260200/Seita.9G425900/Seita.9G440600/Seita.9G441000/Seita.9G494200	23		Ci328up	BP	GO:0009636	response to toxic substance	33/610	252/9983	2.56515e-05	0.00452865	0.00444298	Seita.1G012200/Seita.1G203000/Seita.1G239600/Seita.2G132500/Seita.2G324100/Seita.3G060800/Seita.3G145000/Seita.3G175700/Seita.3G192300/Seita.4G067200/Seita.4G110900/Seita.4G259700/Seita.5G092400/Seita.5G207000/Seita.5G315500/Seita.5G328800/Seita.5G333100/Seita.5G346500/Seita.5G411200/Seita.7G102200/Seita.7G122100/Seita.7G167900/Seita.7G178000/Seita.8G019400/Seita.8G153700/Seita.8G222300/Seita.9G0…	33
Ci328DEG	MF	GO:0048037	cofactor binding	59/1621	199/8539	0.000159515	0.00830926	0.00717434	Seita.1G034000/Seita.1G069500/Seita.1G117500/Seita.1G127500/Seita.1G195100/Seita.1G221800/Seita.1G357900/Seita.2G033500/Seita.2G104900/Seita.2G166700/Seita.2G178900/Seita.2G217800/Seita.2G290900/Seita.2G309200/Seita.2G442100/Seita.3G036400/Seita.3G060800/Seita.3G084500/Seita.3G330000/Seita.3G346000/Seita.3G351700/Seita.3G386300/Seita.5G071800/Seita.5G165100/Seita.5G299100/Seita.5G342100/Seita.5G4…	59		Ci134down	BP	GO:0046688	response to copper ion	5/454	13/9983	0.000180757	0.0116437	0.0111387	Seita.1G127700/Seita.5G365900/Seita.7G194000/Seita.7G330200/Seita.8G018100	5		Ci328up	BP	GO:0010224	response to UV-B	14/610	69/9983	5.87845e-05	0.00910486	0.00893262	Seita.1G043800/Seita.1G057100/Seita.1G117200/Seita.2G053300/Seita.2G053700/Seita.2G053800/Seita.4G224000/Seita.5G025200/Seita.5G091900/Seita.5G096100/Seita.5G153400/Seita.7G168700/Seita.9G115500/Seita.9G432200	14
Ci328DEG	MF	GO:0015075	ion transmembrane transporter activity	123/1621	495/8539	0.000534202	0.0234611	0.0202567	Seita.1G019500/Seita.1G028000/Seita.1G057900/Seita.1G115700/Seita.1G115800/Seita.1G175000/Seita.1G241300/Seita.1G259900/Seita.1G266400/Seita.1G268000/Seita.1G270500/Seita.1G272900/Seita.1G278500/Seita.1G286600/Seita.1G333100/Seita.1G379500/Seita.2G026700/Seita.2G049100/Seita.2G090200/Seita.2G176800/Seita.2G197500/Seita.2G205100/Seita.2G224400/Seita.2G228300/Seita.2G278500/Seita.2G335600/Seita.2G3…	123		Ci134down	BP	GO:0000271	polysaccharide biosynthetic process	17/454	140/9983	0.000199797	0.0123555	0.0118196	Seita.1G080900/Seita.2G209100/Seita.3G046000/Seita.3G132100/Seita.3G158400/Seita.3G158500/Seita.3G217800/Seita.3G235400/Seita.5G319100/Seita.5G437300/Seita.7G264400/Seita.8G128800/Seita.9G037100/Seita.9G425900/Seita.9G440600/Seita.9G441000/Seita.9G494200	17		Ci328up	BP	GO:0009409	response to cold	42/610	368/9983	6.09491e-05	0.00910486	0.00893262	Seita.1G062400/Seita.1G127200/Seita.1G257600/Seita.1G267200/Seita.1G275700/Seita.1G308900/Seita.1G319600/Seita.1G324300/Seita.2G053300/Seita.2G053700/Seita.2G053800/Seita.2G142500/Seita.2G164500/Seita.3G064700/Seita.3G095700/Seita.3G144000/Seita.3G162400/Seita.4G021300/Seita.4G048300/Seita.4G225400/Seita.4G238400/Seita.4G259700/Seita.5G166200/Seita.5G166300/Seita.5G240100/Seita.5G411200/Seita.5G4…	42
Ci328DEG	MF	GO:0046527	glucosyltransferase activity	37/1621	116/8539	0.000571703	0.0234611	0.0202567	Seita.1G057100/Seita.1G245200/Seita.1G268900/Seita.1G378600/Seita.2G080900/Seita.2G209100/Seita.3G155100/Seita.3G194500/Seita.3G337900/Seita.4G041500/Seita.4G120200/Seita.4G127200/Seita.4G213700/Seita.4G223900/Seita.4G228200/Seita.4G271600/Seita.5G064300/Seita.5G274700/Seita.5G319100/Seita.5G402400/Seita.5G429100/Seita.6G073000/Seita.7G079000/Seita.7G139300/Seita.7G173500/Seita.7G318900/Seita.8G0…	37		Ci134down	BP	GO:0009809	lignin biosynthetic process	9/454	47/9983	0.000223768	0.0133056	0.0127285	Seita.1G230100/Seita.3G194300/Seita.4G181500/Seita.5G053000/Seita.6G055900/Seita.7G155700/Seita.7G220500/Seita.8G126500/Seita.8G252500	9		Ci328up	BP	GO:0080167	response to karrikin	21/610	136/9983	7.29024e-05	0.0101126	0.0099213	Seita.1G043800/Seita.1G057100/Seita.2G053300/Seita.2G053700/Seita.2G053800/Seita.2G081000/Seita.2G335600/Seita.3G393100/Seita.3G406500/Seita.4G021300/Seita.4G043100/Seita.4G224000/Seita.4G276400/Seita.7G090200/Seita.7G168700/Seita.7G301600/Seita.8G013300/Seita.8G020600/Seita.8G228200/Seita.9G064400/Seita.9G379000	21
Ci328DEG	MF	GO:0015318	inorganic molecular entity transmembrane transporter activity	122/1621	492/8539	0.000613197	0.0234611	0.0202567	Seita.1G019500/Seita.1G028000/Seita.1G057900/Seita.1G115700/Seita.1G115800/Seita.1G175000/Seita.1G259900/Seita.1G266400/Seita.1G268000/Seita.1G270500/Seita.1G272900/Seita.1G278500/Seita.1G286600/Seita.1G333100/Seita.1G372300/Seita.1G379500/Seita.2G026700/Seita.2G049100/Seita.2G090200/Seita.2G176800/Seita.2G197500/Seita.2G205100/Seita.2G224400/Seita.2G228300/Seita.2G278500/Seita.2G335600/Seita.2G3…	122		Ci134down	BP	GO:0009826	unidimensional cell growth	25/454	257/9983	0.000269997	0.0154598	0.0147893	Seita.1G078600/Seita.1G116500/Seita.1G127700/Seita.1G235000/Seita.2G005900/Seita.2G401300/Seita.3G025000/Seita.3G084500/Seita.3G136800/Seita.4G237700/Seita.4G260000/Seita.5G242700/Seita.5G282200/Seita.5G369600/Seita.5G404900/Seita.6G001600/Seita.6G045900/Seita.6G089500/Seita.9G326300/Seita.9G326600/Seita.9G326900/Seita.9G327100/Seita.9G478500/Seita.9G487500/Seita.9G494200	25		Ci328up	BP	GO:0006839	mitochondrial transport	17/610	99/9983	9.2103e-05	0.0113514	0.0111367	Seita.1G044800/Seita.2G259500/Seita.2G302200/Seita.3G064700/Seita.3G128300/Seita.3G163700/Seita.4G222300/Seita.5G011600/Seita.5G011800/Seita.5G012100/Seita.5G015100/Seita.5G026800/Seita.5G206700/Seita.5G231900/Seita.7G228300/Seita.9G431100/Seita.9G543300	17
Ci328DEG	MF	GO:0016151	nickel cation binding	7/1621	10/8539	0.000614166	0.0234611	0.0202567	Seita.5G166200/Seita.5G166300/Seita.6G036000/Seita.6G036100/Seita.8G115200/Seita.8G115400/Seita.9G151800	7		Ci134down	BP	GO:0005976	polysaccharide metabolic process	25/454	260/9983	0.000322514	0.0178074	0.017035	Seita.1G080900/Seita.1G112800/Seita.2G209100/Seita.2G439200/Seita.3G046000/Seita.3G132100/Seita.3G158400/Seita.3G158500/Seita.3G217800/Seita.3G235400/Seita.5G002800/Seita.5G053000/Seita.5G319100/Seita.5G437300/Seita.7G257800/Seita.7G264400/Seita.8G081100/Seita.8G128800/Seita.9G037100/Seita.9G091600/Seita.9G260200/Seita.9G425900/Seita.9G440600/Seita.9G441000/Seita.9G494200	25		Ci328up	BP	GO:1990542	mitochondrial transmembrane transport	11/610	47/9983	9.35233e-05	0.0113514	0.0111367	Seita.3G064700/Seita.3G163700/Seita.5G011600/Seita.5G011800/Seita.5G012100/Seita.5G015100/Seita.5G026800/Seita.5G206700/Seita.5G231900/Seita.9G431100/Seita.9G543300	11
Ci328DEG	MF	GO:0070008	serine-type exopeptidase activity	13/1621	28/8539	0.000854647	0.0293288	0.0253229	Seita.1G116400/Seita.5G157800/Seita.5G158000/Seita.5G202300/Seita.5G370200/Seita.7G269800/Seita.8G097000/Seita.8G134300/Seita.9G262900/Seita.9G340500/Seita.9G376900/Seita.9G377000/Seita.9G377100	13		Ci134down	BP	GO:0071555	cell wall organization	19/454	177/9983	0.000430887	0.0229708	0.0219745	Seita.1G079000/Seita.1G112800/Seita.2G044900/Seita.2G209100/Seita.2G404000/Seita.3G347500/Seita.4G181500/Seita.4G259700/Seita.8G100100/Seita.8G128800/Seita.9G233400/Seita.9G287400/Seita.9G326300/Seita.9G326600/Seita.9G326900/Seita.9G327100/Seita.9G363400/Seita.9G441000/Seita.9G494200	19		Ci328up	BP	GO:1900140	regulation of seedling development	15/610	84/9983	0.000149934	0.0163664	0.0160568	Seita.1G252000/Seita.2G053300/Seita.2G053700/Seita.2G053800/Seita.2G193000/Seita.3G010200/Seita.3G139000/Seita.3G193800/Seita.4G143700/Seita.4G238400/Seita.4G279000/Seita.6G144900/Seita.8G118200/Seita.9G289600/Seita.9G425300	15
Ci328DEG	MF	GO:0022804	active transmembrane transporter activity	69/1621	255/8539	0.000870139	0.0293288	0.0253229	Seita.1G019500/Seita.1G028000/Seita.1G039400/Seita.1G057900/Seita.1G241300/Seita.1G278500/Seita.1G286600/Seita.2G176800/Seita.2G179600/Seita.2G205100/Seita.2G335300/Seita.2G335600/Seita.2G352200/Seita.2G368200/Seita.2G368900/Seita.3G102000/Seita.3G193100/Seita.3G215300/Seita.3G260100/Seita.3G356700/Seita.3G357100/Seita.3G357700/Seita.4G047900/Seita.4G138500/Seita.4G140700/Seita.5G039100/Seita.5G1…	69		Ci134down	BP	GO:0048640	negative regulation of developmental growth	6/454	24/9983	0.000571884	0.0294711	0.0281929	Seita.1G127700/Seita.1G305000/Seita.3G136800/Seita.3G375500/Seita.4G247100/Seita.5G242700	6		Ci328up	BP	GO:0046677	response to antibiotic	35/610	299/9983	0.000151697	0.0163664	0.0160568	Seita.1G012200/Seita.1G239600/Seita.1G250600/Seita.3G060800/Seita.3G145000/Seita.3G175700/Seita.3G192300/Seita.3G371900/Seita.4G067200/Seita.4G227100/Seita.4G288100/Seita.5G092400/Seita.5G156700/Seita.5G207000/Seita.5G315500/Seita.5G411200/Seita.6G055700/Seita.6G254500/Seita.7G113700/Seita.7G167900/Seita.7G212900/Seita.7G220500/Seita.8G019400/Seita.8G173800/Seita.8G222300/Seita.9G115500/Seita.9G3…	35
Ci328DEG	MF	GO:0019203	carbohydrate phosphatase activity	11/1621	22/8539	0.000996013	0.030359	0.0262124	Seita.1G262000/Seita.1G323700/Seita.2G188200/Seita.2G396200/Seita.3G227500/Seita.4G092100/Seita.6G128700/Seita.8G014700/Seita.9G315500/Seita.9G328900/Seita.9G458800	11		Ci134down	BP	GO:0007018	microtubule-based movement	11/454	77/9983	0.000673117	0.033569	0.0321131	Seita.1G005900/Seita.1G252700/Seita.1G291400/Seita.1G310000/Seita.3G340900/Seita.4G085500/Seita.5G055100/Seita.6G237500/Seita.7G183000/Seita.7G248700/Seita.8G215500	11		Ci328up	BP	GO:0010029	regulation of seed germination	14/610	82/9983	0.000400718	0.0375601	0.0368495	Seita.1G252000/Seita.2G053300/Seita.2G053700/Seita.2G053800/Seita.2G193000/Seita.3G010200/Seita.3G139000/Seita.3G193800/Seita.4G143700/Seita.4G238400/Seita.6G144900/Seita.8G118200/Seita.9G289600/Seita.9G425300	14
Ci328DEG	MF	GO:0004601	peroxidase activity	17/1621	42/8539	0.00100667	0.030359	0.0262124	Seita.1G079000/Seita.1G117500/Seita.1G192100/Seita.2G406500/Seita.3G190400/Seita.3G270300/Seita.4G259700/Seita.5G046600/Seita.5G053000/Seita.5G053100/Seita.5G463200/Seita.6G210000/Seita.7G023900/Seita.7G225300/Seita.7G277800/Seita.9G316400/Seita.9G552800	17		Ci134down	BP	GO:2000652	regulation of secondary cell wall biogenesis	6/454	26/9983	0.000905451	0.0436159	0.0417243	Seita.3G136800/Seita.3G350800/Seita.5G242700/Seita.5G363400/Seita.7G220500/Seita.9G560500	6		Ci328up	BP	GO:0071483	cellular response to blue light	7/610	24/9983	0.000425786	0.0375601	0.0368495	Seita.1G067400/Seita.2G053300/Seita.2G053700/Seita.2G053800/Seita.2G284200/Seita.3G126900/Seita.5G007800	7
Ci328DEG	MF	GO:0015171	amino acid transmembrane transporter activity	22/1621	61/8539	0.00124598	0.0356974	0.0308217	Seita.1G268000/Seita.1G286600/Seita.1G333100/Seita.2G026700/Seita.2G090200/Seita.3G127900/Seita.4G006500/Seita.4G006600/Seita.5G015100/Seita.5G026800/Seita.5G230200/Seita.5G365100/Seita.5G387200/Seita.7G037100/Seita.7G058800/Seita.7G058900/Seita.7G102400/Seita.9G288200/Seita.9G311800/Seita.9G388900/Seita.9G389000/Seita.9G431100	22		Ci134down	BP	GO:0044550	secondary metabolite biosynthetic process	21/454	218/9983	0.000931	0.0436159	0.0417243	Seita.1G230100/Seita.3G142500/Seita.3G194300/Seita.3G218600/Seita.3G394400/Seita.4G181500/Seita.4G191500/Seita.4G260400/Seita.5G035900/Seita.5G053000/Seita.5G386300/Seita.6G055900/Seita.6G093400/Seita.6G244100/Seita.7G096800/Seita.7G155700/Seita.7G220500/Seita.8G126500/Seita.8G128800/Seita.8G252500/Seita.9G214500	21		Ci328up	BP	GO:0006626	protein targeting to mitochondrion	10/610	47/9983	0.000444841	0.0375601	0.0368495	Seita.3G064700/Seita.3G163700/Seita.5G011600/Seita.5G011800/Seita.5G012100/Seita.5G026800/Seita.5G231900/Seita.7G228300/Seita.9G431100/Seita.9G543300	10
Ci328DEG	MF	GO:0016684	oxidoreductase activity, acting on peroxide as acceptor	17/1621	43/8539	0.00137459	0.0374879	0.0323677	Seita.1G079000/Seita.1G117500/Seita.1G192100/Seita.2G406500/Seita.3G190400/Seita.3G270300/Seita.4G259700/Seita.5G046600/Seita.5G053000/Seita.5G053100/Seita.5G463200/Seita.6G210000/Seita.7G023900/Seita.7G225300/Seita.7G277800/Seita.9G316400/Seita.9G552800	17		Ci134down	CC	GO:0031226	intrinsic component of plasma membrane	38/410	331/9955	8.1709e-09	1.291e-06	1.06652e-06	Seita.1G020100/Seita.1G092000/Seita.1G116500/Seita.1G127700/Seita.1G256300/Seita.1G333100/Seita.2G044900/Seita.2G115900/Seita.2G154700/Seita.2G166300/Seita.2G166600/Seita.2G250200/Seita.2G327700/Seita.2G351200/Seita.2G412000/Seita.3G193100/Seita.3G225200/Seita.3G233000/Seita.3G263800/Seita.4G005300/Seita.4G006500/Seita.4G006600/Seita.4G051900/Seita.4G098700/Seita.5G007400/Seita.5G079300/Seita.5G1…	38		Ci328up	BP	GO:0070585	protein localization to mitochondrion	10/610	47/9983	0.000444841	0.0375601	0.0368495	Seita.3G064700/Seita.3G163700/Seita.5G011600/Seita.5G011800/Seita.5G012100/Seita.5G026800/Seita.5G231900/Seita.7G228300/Seita.9G431100/Seita.9G543300	10
Ci328DEG	MF	GO:0004185	serine-type carboxypeptidase activity	12/1621	26/8539	0.00143933	0.0374879	0.0323677	Seita.1G116400/Seita.5G157800/Seita.5G158000/Seita.5G202300/Seita.5G370200/Seita.7G269800/Seita.8G097000/Seita.8G134300/Seita.9G340500/Seita.9G376900/Seita.9G377000/Seita.9G377100	12		Ci134down	CC	GO:0030312	external encapsulating structure	44/410	491/9955	8.13231e-07	6.42452e-05	5.3074e-05	Seita.1G079000/Seita.1G092000/Seita.1G180600/Seita.1G295700/Seita.1G323700/Seita.2G154700/Seita.2G396200/Seita.2G404000/Seita.2G439200/Seita.3G067600/Seita.3G101400/Seita.3G177600/Seita.3G263800/Seita.3G294700/Seita.3G347500/Seita.4G234100/Seita.4G259700/Seita.5G053000/Seita.5G118700/Seita.5G118800/Seita.5G263600/Seita.5G319100/Seita.5G357900/Seita.5G448400/Seita.5G454800/Seita.6G001600/Seita.6G1…	44		Ci328up	BP	GO:0072655	establishment of protein localization to mitochondrion	10/610	47/9983	0.000444841	0.0375601	0.0368495	Seita.3G064700/Seita.3G163700/Seita.5G011600/Seita.5G011800/Seita.5G012100/Seita.5G026800/Seita.5G231900/Seita.7G228300/Seita.9G431100/Seita.9G543300	10
Ci328DEG	MF	GO:0005509	calcium ion binding	29/1621	90/8539	0.00181506	0.0452185	0.0390424	Seita.1G019500/Seita.1G107200/Seita.1G127700/Seita.1G130300/Seita.1G213900/Seita.1G231200/Seita.1G263400/Seita.1G364500/Seita.3G079700/Seita.3G135500/Seita.3G166700/Seita.3G261400/Seita.3G290500/Seita.3G375800/Seita.4G257500/Seita.5G217800/Seita.5G255000/Seita.5G456800/Seita.5G456900/Seita.7G149600/Seita.7G162000/Seita.7G162900/Seita.8G026400/Seita.8G176000/Seita.9G173100/Seita.9G333800/Seita.9G4…	29		Ci134down	CC	GO:0046658	anchored component of plasma membrane	18/410	119/9955	1.60275e-06	7.54393e-05	6.23216e-05	Seita.1G092000/Seita.1G127700/Seita.1G256300/Seita.2G044900/Seita.2G154700/Seita.2G250200/Seita.2G327700/Seita.2G351200/Seita.2G412000/Seita.3G225200/Seita.3G263800/Seita.5G263600/Seita.5G448400/Seita.8G079300/Seita.9G233400/Seita.9G363400/Seita.9G479800/Seita.9G486000	18		Ci328up	BP	GO:0034605	cellular response to heat	11/610	56/9983	0.000484177	0.039178	0.0384369	Seita.1G162500/Seita.1G177700/Seita.2G053300/Seita.2G053700/Seita.2G053800/Seita.2G284200/Seita.3G175700/Seita.5G207000/Seita.7G060200/Seita.9G106800/Seita.9G440100	11
Ci409DEG	BP	GO:0009414	response to water deprivation	92/1471	340/9983	1.45919e-09	2.38327e-06	2.29139e-06	Seita.1G079000/Seita.1G103700/Seita.1G127700/Seita.1G161800/Seita.1G177700/Seita.1G185100/Seita.1G267200/Seita.1G270500/Seita.1G278900/Seita.1G324300/Seita.2G033500/Seita.2G049100/Seita.2G164500/Seita.2G229500/Seita.2G284000/Seita.2G352700/Seita.2G400600/Seita.2G406500/Seita.3G007200/Seita.3G048500/Seita.3G144000/Seita.3G162400/Seita.3G193800/Seita.3G237600/Seita.3G260500/Seita.3G337900/Seita.3G3…	92		Ci134down	CC	GO:0005618	cell wall	43/410	490/9955	1.90986e-06	7.54393e-05	6.23216e-05	Seita.1G079000/Seita.1G092000/Seita.1G180600/Seita.1G295700/Seita.1G323700/Seita.2G154700/Seita.2G396200/Seita.2G404000/Seita.2G439200/Seita.3G067600/Seita.3G101400/Seita.3G177600/Seita.3G263800/Seita.3G294700/Seita.3G347500/Seita.4G234100/Seita.4G259700/Seita.5G053000/Seita.5G118700/Seita.5G118800/Seita.5G263600/Seita.5G319100/Seita.5G357900/Seita.5G448400/Seita.5G454800/Seita.6G001600/Seita.6G1…	43		Ci328up	CC	GO:0005741	mitochondrial outer membrane	9/576	32/9955	5.76018e-05	0.0137668	0.0130968	Seita.2G309200/Seita.2G442900/Seita.5G011600/Seita.5G011800/Seita.5G012100/Seita.5G231900/Seita.5G320900/Seita.7G305300/Seita.8G009400	9
Ci409DEG	BP	GO:0009415	response to water	93/1471	347/9983	2.02401e-09	2.38327e-06	2.29139e-06	Seita.1G079000/Seita.1G103700/Seita.1G127700/Seita.1G161800/Seita.1G177700/Seita.1G185100/Seita.1G267200/Seita.1G270500/Seita.1G278900/Seita.1G324300/Seita.2G033500/Seita.2G049100/Seita.2G164500/Seita.2G229500/Seita.2G284000/Seita.2G352700/Seita.2G400600/Seita.2G406500/Seita.2G436000/Seita.3G007200/Seita.3G048500/Seita.3G144000/Seita.3G162400/Seita.3G193800/Seita.3G237600/Seita.3G260500/Seita.3G3…	93		Ci134down	CC	GO:0031225	anchored component of membrane	19/410	142/9955	5.39293e-06	0.000170417	0.000140784	Seita.1G092000/Seita.1G127700/Seita.1G256300/Seita.2G044900/Seita.2G154700/Seita.2G250200/Seita.2G327700/Seita.2G351200/Seita.2G412000/Seita.3G225200/Seita.3G263800/Seita.5G263600/Seita.5G448400/Seita.7G272500/Seita.8G079300/Seita.9G233400/Seita.9G363400/Seita.9G479800/Seita.9G486000	19		Ci328up	CC	GO:0005740	mitochondrial envelope	27/576	224/9955	0.000225534	0.0201667	0.0191853	Seita.1G044800/Seita.1G123300/Seita.1G210300/Seita.1G272900/Seita.1G349900/Seita.2G259500/Seita.2G302200/Seita.2G309200/Seita.2G442900/Seita.3G064700/Seita.3G128300/Seita.4G222300/Seita.5G011600/Seita.5G011800/Seita.5G012100/Seita.5G015100/Seita.5G026800/Seita.5G206700/Seita.5G231900/Seita.5G320900/Seita.6G067400/Seita.6G208200/Seita.7G228300/Seita.7G305300/Seita.8G009400/Seita.9G416100/Seita.9G4…	27
Ci409DEG	BP	GO:0019748	secondary metabolic process	83/1471	305/9983	7.11343e-09	5.58404e-06	5.36877e-06	Seita.1G019400/Seita.1G063900/Seita.1G064000/Seita.1G064100/Seita.1G089800/Seita.1G198900/Seita.1G219200/Seita.1G245800/Seita.1G270800/Seita.2G033500/Seita.2G132800/Seita.2G145700/Seita.2G145800/Seita.2G145900/Seita.2G219600/Seita.2G219700/Seita.2G224300/Seita.2G283800/Seita.2G300900/Seita.2G400600/Seita.3G077100/Seita.3G096900/Seita.3G097200/Seita.3G097400/Seita.3G140700/Seita.3G155100/Seita.3G1…	83		Ci134down	CC	GO:0005802	trans-Golgi network	24/410	230/9955	2.55916e-05	0.000673912	0.00055673	Seita.1G300500/Seita.1G347800/Seita.1G360400/Seita.2G263800/Seita.3G158400/Seita.3G158500/Seita.3G217800/Seita.3G228400/Seita.3G235400/Seita.4G185100/Seita.4G196400/Seita.4G237700/Seita.5G073800/Seita.5G351500/Seita.5G366000/Seita.5G405000/Seita.5G437300/Seita.6G001600/Seita.7G264400/Seita.7G315700/Seita.8G018300/Seita.8G025000/Seita.8G045900/Seita.9G510500	24		Ci328up	CC	GO:0019867	outer membrane	14/576	85/9955	0.000337518	0.0201667	0.0191853	Seita.2G309200/Seita.2G442900/Seita.3G064700/Seita.5G011600/Seita.5G011800/Seita.5G012100/Seita.5G026800/Seita.5G231900/Seita.5G320900/Seita.7G305300/Seita.8G009400/Seita.8G237500/Seita.9G431100/Seita.9G490800	14
Ci409DEG	BP	GO:0010200	response to chitin	39/1471	105/9983	1.0791e-08	6.35319e-06	6.10826e-06	Seita.1G034600/Seita.1G064700/Seita.1G067400/Seita.1G178400/Seita.1G185100/Seita.1G253100/Seita.1G257600/Seita.1G278900/Seita.2G013400/Seita.2G156100/Seita.2G269700/Seita.2G302400/Seita.2G351400/Seita.3G007200/Seita.3G062200/Seita.3G062400/Seita.3G139200/Seita.3G237600/Seita.3G287100/Seita.4G067200/Seita.4G163600/Seita.4G197100/Seita.4G277900/Seita.5G001000/Seita.5G044000/Seita.5G207000/Seita.5G2…	39		Ci134down	CC	GO:0098791	Golgi apparatus subcompartment	27/410	303/9955	0.00012973	0.00292819	0.00241902	Seita.1G300500/Seita.1G347800/Seita.1G360400/Seita.2G263800/Seita.3G046000/Seita.3G158400/Seita.3G158500/Seita.3G217800/Seita.3G228400/Seita.3G235400/Seita.4G185100/Seita.4G196400/Seita.4G237700/Seita.5G073800/Seita.5G351500/Seita.5G366000/Seita.5G405000/Seita.5G437300/Seita.6G001600/Seita.7G203700/Seita.7G264400/Seita.7G315700/Seita.8G018300/Seita.8G025000/Seita.8G033700/Seita.8G045900/Seita.9G5…	27		Ci328up	CC	GO:0031968	organelle outer membrane	14/576	85/9955	0.000337518	0.0201667	0.0191853	Seita.2G309200/Seita.2G442900/Seita.3G064700/Seita.5G011600/Seita.5G011800/Seita.5G012100/Seita.5G026800/Seita.5G231900/Seita.5G320900/Seita.7G305300/Seita.8G009400/Seita.8G237500/Seita.9G431100/Seita.9G490800	14
Ci409DEG	BP	GO:0009636	response to toxic substance	66/1471	252/9983	1.12986e-06	0.000532162	0.000511646	Seita.1G002000/Seita.1G012200/Seita.1G045200/Seita.1G079000/Seita.1G089800/Seita.1G192100/Seita.1G219700/Seita.1G245800/Seita.2G001400/Seita.2G033500/Seita.2G090500/Seita.2G324100/Seita.2G352900/Seita.2G406500/Seita.3G089400/Seita.3G096900/Seita.3G097200/Seita.3G175700/Seita.3G190400/Seita.3G192300/Seita.3G270300/Seita.3G286500/Seita.4G011900/Seita.4G020900/Seita.4G067200/Seita.4G232000/Seita.5G0…	66		Ci134down	CC	GO:0099513	polymeric cytoskeletal fiber	13/410	101/9955	0.000244321	0.00482533	0.00398628	Seita.1G005900/Seita.1G127700/Seita.1G235000/Seita.1G252700/Seita.2G031200/Seita.3G046100/Seita.4G069300/Seita.4G085500/Seita.5G180900/Seita.6G222800/Seita.6G237500/Seita.7G183000/Seita.7G248700	13		Ci328up	CC	GO:0031966	mitochondrial membrane	25/576	209/9955	0.000428388	0.020477	0.0194804	Seita.1G044800/Seita.1G123300/Seita.1G210300/Seita.1G272900/Seita.2G259500/Seita.2G302200/Seita.2G309200/Seita.2G442900/Seita.3G064700/Seita.3G128300/Seita.4G222300/Seita.5G011600/Seita.5G011800/Seita.5G012100/Seita.5G015100/Seita.5G026800/Seita.5G206700/Seita.5G231900/Seita.5G320900/Seita.6G067400/Seita.6G208200/Seita.7G228300/Seita.7G305300/Seita.8G009400/Seita.9G431100	25
Ci409DEG	BP	GO:0032787	monocarboxylic acid metabolic process	96/1471	412/9983	1.63391e-06	0.000641308	0.000616585	Seita.1G047500/Seita.1G063600/Seita.1G069500/Seita.1G103700/Seita.1G122400/Seita.1G219200/Seita.1G245800/Seita.1G371900/Seita.2G057100/Seita.2G151800/Seita.2G185300/Seita.2G187800/Seita.2G187900/Seita.2G190100/Seita.2G290900/Seita.2G300900/Seita.2G360500/Seita.2G400600/Seita.3G056400/Seita.3G096900/Seita.3G097200/Seita.3G111200/Seita.3G150700/Seita.3G165200/Seita.3G170100/Seita.3G183600/Seita.3G2…	96		Ci134down	CC	GO:0005874	microtubule	12/410	90/9955	0.000301921	0.00530039	0.00437873	Seita.1G005900/Seita.1G127700/Seita.1G235000/Seita.1G252700/Seita.2G031200/Seita.3G046100/Seita.4G069300/Seita.4G085500/Seita.6G222800/Seita.6G237500/Seita.7G183000/Seita.7G248700	12		Ci328up	CC	GO:0048046	apoplast	26/576	226/9955	0.000605742	0.0241287	0.0229545	Seita.1G170500/Seita.1G324300/Seita.1G339500/Seita.2G168000/Seita.2G173700/Seita.2G418200/Seita.3G010200/Seita.3G060800/Seita.3G130700/Seita.4G036600/Seita.4G191200/Seita.4G245500/Seita.5G014300/Seita.5G240100/Seita.5G291800/Seita.5G448500/Seita.7G122100/Seita.7G178000/Seita.7G182600/Seita.9G031700/Seita.9G060800/Seita.9G064400/Seita.9G169300/Seita.9G208200/Seita.9G416100/Seita.9G494000	26
Ci409DEG	BP	GO:0044550	secondary metabolite biosynthetic process	58/1471	218/9983	2.93566e-06	0.000926274	0.000890564	Seita.1G019400/Seita.1G063900/Seita.1G064000/Seita.1G064100/Seita.1G089800/Seita.1G219200/Seita.2G132800/Seita.2G145700/Seita.2G145800/Seita.2G145900/Seita.2G219600/Seita.2G219700/Seita.2G224300/Seita.2G283800/Seita.3G186600/Seita.3G218600/Seita.3G298400/Seita.4G021600/Seita.4G205900/Seita.4G216300/Seita.4G235500/Seita.4G235600/Seita.5G047800/Seita.5G053100/Seita.5G053200/Seita.5G257200/Seita.5G3…	58		Ci134down	CC	GO:0031410	cytoplasmic vesicle	35/410	466/9955	0.000407232	0.00602645	0.00497855	Seita.1G120000/Seita.1G175200/Seita.1G263400/Seita.1G300500/Seita.1G347800/Seita.2G031200/Seita.2G127000/Seita.2G263800/Seita.2G325500/Seita.2G367900/Seita.2G406100/Seita.3G115200/Seita.3G158400/Seita.3G158500/Seita.3G217800/Seita.3G228400/Seita.3G235400/Seita.4G185100/Seita.4G196400/Seita.5G027400/Seita.5G117400/Seita.5G351500/Seita.5G366000/Seita.5G405000/Seita.5G437300/Seita.6G001600/Seita.7G2…	35		Ci409up	BP	GO:0009408	response to heat	25/470	199/9983	6.70208e-06	0.0120503	0.0118803	Seita.1G012200/Seita.1G324300/Seita.1G326600/Seita.1G342400/Seita.2G053300/Seita.2G053700/Seita.2G053800/Seita.2G229700/Seita.3G175700/Seita.4G089700/Seita.4G111400/Seita.4G227700/Seita.5G092400/Seita.5G093000/Seita.5G131300/Seita.5G315500/Seita.5G328200/Seita.5G448900/Seita.7G060200/Seita.7G116800/Seita.7G117400/Seita.9G106800/Seita.9G440100/Seita.9G460100/Seita.9G488400	25
Ci409DEG	BP	GO:0006979	response to oxidative stress	89/1471	380/9983	3.14658e-06	0.000926274	0.000890564	Seita.1G012200/Seita.1G044800/Seita.1G045200/Seita.1G063600/Seita.1G144700/Seita.1G192100/Seita.1G193500/Seita.1G209700/Seita.1G210300/Seita.1G219700/Seita.1G257600/Seita.1G272900/Seita.2G013400/Seita.2G033500/Seita.2G077200/Seita.2G081000/Seita.2G156100/Seita.2G188200/Seita.2G219600/Seita.2G219700/Seita.2G335300/Seita.2G396200/Seita.2G441700/Seita.3G032300/Seita.3G089400/Seita.3G111700/Seita.3G1…	89		Ci134down	CC	GO:0005887	integral component of plasma membrane	20/410	211/9955	0.000435805	0.00602645	0.00497855	Seita.1G020100/Seita.1G116500/Seita.1G333100/Seita.2G115900/Seita.2G166300/Seita.2G166600/Seita.3G193100/Seita.3G233000/Seita.4G005300/Seita.4G006500/Seita.4G006600/Seita.4G051900/Seita.4G098700/Seita.5G007400/Seita.5G079300/Seita.5G104100/Seita.5G403300/Seita.7G194000/Seita.8G025400/Seita.9G506300	20		Ci409up	BP	GO:0009644	response to high light intensity	14/470	80/9983	1.87085e-05	0.016819	0.0165817	Seita.1G012200/Seita.1G257600/Seita.2G053300/Seita.2G053700/Seita.2G053800/Seita.3G175700/Seita.4G099200/Seita.5G014300/Seita.5G092400/Seita.5G315500/Seita.7G257400/Seita.9G272800/Seita.9G457400/Seita.9G488400	14
Ci409DEG	BP	GO:0071554	cell wall organization or biogenesis	92/1471	409/9983	1.25091e-05	0.0032732	0.00314701	Seita.1G079000/Seita.1G112800/Seita.1G123400/Seita.1G213900/Seita.1G287600/Seita.1G294300/Seita.1G309600/Seita.1G316700/Seita.2G044900/Seita.2G072400/Seita.2G199800/Seita.2G200200/Seita.2G313800/Seita.2G368200/Seita.2G382900/Seita.2G414200/Seita.2G415500/Seita.3G003000/Seita.3G096400/Seita.3G134300/Seita.3G190400/Seita.3G246700/Seita.3G270300/Seita.3G288600/Seita.3G300900/Seita.3G337900/Seita.4G0…	92		Ci134down	CC	GO:0005938	cell cortex	14/410	122/9955	0.000477147	0.00602645	0.00497855	Seita.1G116500/Seita.1G144700/Seita.1G235000/Seita.1G292500/Seita.1G333100/Seita.2G031200/Seita.2G115900/Seita.2G166300/Seita.2G166600/Seita.4G005300/Seita.4G006500/Seita.4G006600/Seita.5G079300/Seita.5G369600	14		Ci134down	BP	GO:0019684	photosynthesis, light reaction	18/465	91/9983	1.54567e-07	0.000163506	0.000158829	Seita.2G046600/Seita.2G202200/Seita.2G248100/Seita.2G330500/Seita.2G351600/Seita.2G352900/Seita.3G126900/Seita.3G143800/Seita.3G158600/Seita.4G139900/Seita.4G248300/Seita.5G336700/Seita.6G005700/Seita.6G082000/Seita.7G111300/Seita.8G080900/Seita.9G177100/Seita.J002400	18
Ci409DEG	BP	GO:0000302	response to reactive oxygen species	51/1471	197/9983	2.58342e-05	0.00608396	0.00584942	Seita.1G012200/Seita.1G045200/Seita.1G192100/Seita.1G210300/Seita.1G219700/Seita.1G257600/Seita.2G077200/Seita.2G156100/Seita.2G219600/Seita.2G219700/Seita.2G335300/Seita.2G441700/Seita.3G032300/Seita.3G175700/Seita.3G192300/Seita.3G286500/Seita.3G368800/Seita.4G011900/Seita.4G067200/Seita.4G111400/Seita.5G047800/Seita.5G157600/Seita.5G207000/Seita.5G249900/Seita.5G421200/Seita.5G456800/Seita.5G4…	51		Ci134down	CC	GO:0097708	intracellular vesicle	35/410	471/9955	0.000495847	0.00602645	0.00497855	Seita.1G120000/Seita.1G175200/Seita.1G263400/Seita.1G300500/Seita.1G347800/Seita.2G031200/Seita.2G127000/Seita.2G263800/Seita.2G325500/Seita.2G367900/Seita.2G406100/Seita.3G115200/Seita.3G158400/Seita.3G158500/Seita.3G217800/Seita.3G228400/Seita.3G235400/Seita.4G185100/Seita.4G196400/Seita.5G027400/Seita.5G117400/Seita.5G351500/Seita.5G366000/Seita.5G405000/Seita.5G437300/Seita.6G001600/Seita.7G2…	35		Ci134down	BP	GO:0098656	anion transmembrane transport	33/465	265/9983	2.13873e-07	0.000163506	0.000158829	Seita.1G127900/Seita.1G278500/Seita.2G106700/Seita.2G141700/Seita.2G335600/Seita.2G352700/Seita.2G360800/Seita.3G102000/Seita.3G223500/Seita.3G283100/Seita.3G333100/Seita.4G005300/Seita.4G083300/Seita.4G227300/Seita.4G231500/Seita.5G121600/Seita.5G124100/Seita.5G127600/Seita.5G145600/Seita.5G242900/Seita.5G298500/Seita.5G365100/Seita.5G387200/Seita.6G118800/Seita.6G141000/Seita.7G119400/Seita.7G1…	33
Ci409DEG	BP	GO:0016053	organic acid biosynthetic process	90/1471	415/9983	6.66776e-05	0.0130855	0.012581	Seita.1G009100/Seita.1G127500/Seita.1G219200/Seita.1G245800/Seita.1G259400/Seita.1G291100/Seita.1G371900/Seita.2G057100/Seita.2G144900/Seita.2G185300/Seita.2G190100/Seita.2G290900/Seita.2G300900/Seita.2G400600/Seita.3G032300/Seita.3G090300/Seita.3G111200/Seita.3G153400/Seita.3G183600/Seita.3G311400/Seita.3G346200/Seita.3G375200/Seita.3G397200/Seita.4G021600/Seita.4G078000/Seita.4G078100/Seita.4G0…	90		Ci134down	CC	GO:0031982	vesicle	36/410	497/9955	0.000663456	0.00734173	0.00606512	Seita.1G120000/Seita.1G175200/Seita.1G263400/Seita.1G300500/Seita.1G347800/Seita.2G031200/Seita.2G127000/Seita.2G263800/Seita.2G325500/Seita.2G367900/Seita.2G406100/Seita.3G115200/Seita.3G158400/Seita.3G158500/Seita.3G217800/Seita.3G228400/Seita.3G235400/Seita.4G185100/Seita.4G196400/Seita.5G027400/Seita.5G117400/Seita.5G351500/Seita.5G366000/Seita.5G405000/Seita.5G437300/Seita.6G001600/Seita.7G2…	36		Ci134down	BP	GO:0015979	photosynthesis	20/465	128/9983	1.71255e-06	0.00087283	0.000847863	Seita.2G046600/Seita.2G202200/Seita.2G248100/Seita.2G330500/Seita.2G335600/Seita.2G351600/Seita.2G352900/Seita.3G126900/Seita.3G143800/Seita.3G158600/Seita.4G139900/Seita.4G248300/Seita.5G240000/Seita.5G336700/Seita.6G005700/Seita.6G082000/Seita.7G111300/Seita.8G080900/Seita.9G177100/Seita.J002400	20
Ci409DEG	BP	GO:0046394	carboxylic acid biosynthetic process	90/1471	415/9983	6.66776e-05	0.0130855	0.012581	Seita.1G009100/Seita.1G127500/Seita.1G219200/Seita.1G245800/Seita.1G259400/Seita.1G291100/Seita.1G371900/Seita.2G057100/Seita.2G144900/Seita.2G185300/Seita.2G190100/Seita.2G290900/Seita.2G300900/Seita.2G400600/Seita.3G032300/Seita.3G090300/Seita.3G111200/Seita.3G153400/Seita.3G183600/Seita.3G311400/Seita.3G346200/Seita.3G375200/Seita.3G397200/Seita.4G021600/Seita.4G078000/Seita.4G078100/Seita.4G0…	90		Ci134down	CC	GO:0035371	microtubule plus-end	4/410	11/9955	0.000742851	0.00734173	0.00606512	Seita.1G252700/Seita.4G085500/Seita.6G237500/Seita.7G183000	4		Ci134down	BP	GO:0015718	monocarboxylic acid transport	11/465	42/9983	2.29274e-06	0.0008764	0.00085133	Seita.2G106700/Seita.2G141700/Seita.2G335600/Seita.2G360800/Seita.3G102000/Seita.4G231500/Seita.5G121600/Seita.5G229200/Seita.5G242900/Seita.6G118800/Seita.9G306500	11
Ci409DEG	BP	GO:0002215	defense response to nematode	8/1471	13/9983	0.000140343	0.0254237	0.0244436	Seita.2G377800/Seita.3G175800/Seita.3G263500/Seita.3G263800/Seita.3G315000/Seita.5G448000/Seita.5G448500/Seita.5G450000	8		Ci134down	CC	GO:0009505	plant-type cell wall	20/410	220/9955	0.000743467	0.00734173	0.00606512	Seita.1G079000/Seita.1G092000/Seita.2G404000/Seita.2G439200/Seita.3G101400/Seita.3G294700/Seita.3G347500/Seita.4G259700/Seita.5G053000/Seita.5G263600/Seita.5G357900/Seita.5G454800/Seita.6G001600/Seita.8G100100/Seita.8G206900/Seita.8G230000/Seita.9G073700/Seita.9G363400/Seita.9G414700/Seita.9G486000	20		Ci134down	BP	GO:0006820	anion transport	34/465	328/9983	9.44823e-06	0.00260354	0.00252906	Seita.1G127900/Seita.1G278500/Seita.2G106700/Seita.2G141700/Seita.2G335600/Seita.2G352700/Seita.2G360800/Seita.3G102000/Seita.3G223500/Seita.3G283100/Seita.3G333100/Seita.4G005300/Seita.4G083300/Seita.4G227300/Seita.4G231500/Seita.5G121600/Seita.5G124100/Seita.5G127600/Seita.5G145600/Seita.5G229200/Seita.5G242900/Seita.5G298500/Seita.5G365100/Seita.5G387200/Seita.6G118800/Seita.6G141000/Seita.7G1…	34
Ci409DEG	BP	GO:0009664	plant-type cell wall organization	34/1471	125/9983	0.000201791	0.0329464	0.0316763	Seita.1G079000/Seita.1G213900/Seita.1G316700/Seita.2G044900/Seita.2G415500/Seita.3G096400/Seita.3G190400/Seita.3G246700/Seita.3G270300/Seita.3G300900/Seita.4G148700/Seita.4G271600/Seita.5G046600/Seita.5G062700/Seita.5G434700/Seita.5G463200/Seita.6G105300/Seita.7G203300/Seita.7G277800/Seita.8G220400/Seita.9G088400/Seita.9G150500/Seita.9G287600/Seita.9G316400/Seita.9G326100/Seita.9G326300/Seita.9G3…	34		Ci134down	CC	GO:0005768	endosome	28/410	361/9955	0.000941582	0.0085695	0.0070794	Seita.1G120000/Seita.1G175200/Seita.1G263400/Seita.1G300500/Seita.1G347800/Seita.2G263800/Seita.2G406100/Seita.3G115200/Seita.3G158400/Seita.3G158500/Seita.3G217800/Seita.3G228400/Seita.3G235400/Seita.4G185100/Seita.4G196400/Seita.5G027400/Seita.5G351500/Seita.5G366000/Seita.5G405000/Seita.5G437300/Seita.6G001600/Seita.7G264400/Seita.7G315700/Seita.8G018300/Seita.8G025000/Seita.8G045900/Seita.9G0…	28		Ci134down	BP	GO:1903825	organic acid transmembrane transport	19/465	133/9983	1.19194e-05	0.00260354	0.00252906	Seita.2G106700/Seita.2G141700/Seita.2G335600/Seita.2G360800/Seita.3G102000/Seita.3G223500/Seita.4G005300/Seita.4G083300/Seita.4G231500/Seita.5G121600/Seita.5G127600/Seita.5G145600/Seita.5G242900/Seita.5G365100/Seita.5G387200/Seita.6G118800/Seita.9G306500/Seita.9G311800/Seita.9G440400	19
Ci409DEG	BP	GO:0042445	hormone metabolic process	65/1471	288/9983	0.00020985	0.0329464	0.0316763	Seita.1G166600/Seita.1G245800/Seita.1G275400/Seita.1G371900/Seita.1G373300/Seita.2G039800/Seita.2G098500/Seita.2G144900/Seita.2G185300/Seita.2G229900/Seita.2G436000/Seita.3G048500/Seita.3G147000/Seita.3G150700/Seita.3G156200/Seita.3G170100/Seita.4G015600/Seita.4G015700/Seita.4G078000/Seita.4G078100/Seita.4G078200/Seita.4G224700/Seita.4G235500/Seita.4G235600/Seita.4G288100/Seita.5G157700/Seita.5G2…	65		Ci134down	CC	GO:0099568	cytoplasmic region	14/410	131/9955	0.000976272	0.0085695	0.0070794	Seita.1G116500/Seita.1G144700/Seita.1G235000/Seita.1G292500/Seita.1G333100/Seita.2G031200/Seita.2G115900/Seita.2G166300/Seita.2G166600/Seita.4G005300/Seita.4G006500/Seita.4G006600/Seita.5G079300/Seita.5G369600	14		Ci134down	BP	GO:1905039	carboxylic acid transmembrane transport	19/465	133/9983	1.19194e-05	0.00260354	0.00252906	Seita.2G106700/Seita.2G141700/Seita.2G335600/Seita.2G360800/Seita.3G102000/Seita.3G223500/Seita.4G005300/Seita.4G083300/Seita.4G231500/Seita.5G121600/Seita.5G127600/Seita.5G145600/Seita.5G242900/Seita.5G365100/Seita.5G387200/Seita.6G118800/Seita.9G306500/Seita.9G311800/Seita.9G440400	19
Ci409DEG	BP	GO:0098754	detoxification	34/1471	126/9983	0.000238012	0.0350323	0.0336818	Seita.1G002000/Seita.1G079000/Seita.1G192100/Seita.1G245800/Seita.2G033500/Seita.2G090500/Seita.2G406500/Seita.3G089400/Seita.3G096900/Seita.3G097200/Seita.3G190400/Seita.3G270300/Seita.3G286500/Seita.4G011900/Seita.4G232000/Seita.5G046600/Seita.5G053100/Seita.5G053200/Seita.5G346500/Seita.5G463200/Seita.6G210000/Seita.7G020900/Seita.7G193900/Seita.7G225300/Seita.7G231200/Seita.7G277800/Seita.9G0…	34		Ci134down	CC	GO:1990752	microtubule end	4/410	12/9955	0.00107825	0.00896652	0.00740738	Seita.1G252700/Seita.4G085500/Seita.6G237500/Seita.7G183000	4		Ci134down	BP	GO:0015849	organic acid transport	20/465	148/9983	1.64086e-05	0.00278763	0.00270789	Seita.2G106700/Seita.2G141700/Seita.2G335600/Seita.2G360800/Seita.3G102000/Seita.3G223500/Seita.4G005300/Seita.4G083300/Seita.4G231500/Seita.5G121600/Seita.5G127600/Seita.5G145600/Seita.5G229200/Seita.5G242900/Seita.5G365100/Seita.5G387200/Seita.6G118800/Seita.9G306500/Seita.9G311800/Seita.9G440400	20
Ci409DEG	BP	GO:0006805	xenobiotic metabolic process	7/1471	11/9983	0.000284323	0.039387	0.0378686	Seita.1G089800/Seita.5G104100/Seita.8G041200/Seita.8G153700/Seita.9G205600/Seita.9G205700/Seita.9G205800	7		Ci134down	CC	GO:0099081	supramolecular polymer	13/410	119/9955	0.00119715	0.00900709	0.0074409	Seita.1G005900/Seita.1G127700/Seita.1G235000/Seita.1G252700/Seita.2G031200/Seita.3G046100/Seita.4G069300/Seita.4G085500/Seita.5G180900/Seita.6G222800/Seita.6G237500/Seita.7G183000/Seita.7G248700	13		Ci134down	BP	GO:0046942	carboxylic acid transport	20/465	148/9983	1.64086e-05	0.00278763	0.00270789	Seita.2G106700/Seita.2G141700/Seita.2G335600/Seita.2G360800/Seita.3G102000/Seita.3G223500/Seita.4G005300/Seita.4G083300/Seita.4G231500/Seita.5G121600/Seita.5G127600/Seita.5G145600/Seita.5G229200/Seita.5G242900/Seita.5G365100/Seita.5G387200/Seita.6G118800/Seita.9G306500/Seita.9G311800/Seita.9G440400	20
Ci409DEG	BP	GO:0006721	terpenoid metabolic process	40/1471	159/9983	0.000354124	0.0450434	0.0433069	Seita.1G181900/Seita.2G144900/Seita.2G145800/Seita.2G145900/Seita.2G257000/Seita.2G300900/Seita.2G303000/Seita.2G400600/Seita.4G015600/Seita.4G015700/Seita.4G021600/Seita.4G235500/Seita.4G235600/Seita.4G288600/Seita.5G071800/Seita.5G157700/Seita.5G166000/Seita.5G315800/Seita.5G323400/Seita.5G404900/Seita.6G023100/Seita.6G089500/Seita.6G100500/Seita.6G101900/Seita.6G208200/Seita.7G096800/Seita.7G1…	40		Ci134down	CC	GO:0099512	supramolecular fiber	13/410	119/9955	0.00119715	0.00900709	0.0074409	Seita.1G005900/Seita.1G127700/Seita.1G235000/Seita.1G252700/Seita.2G031200/Seita.3G046100/Seita.4G069300/Seita.4G085500/Seita.5G180900/Seita.6G222800/Seita.6G237500/Seita.7G183000/Seita.7G248700	13		Ci134down	BP	GO:0009765	photosynthesis, light harvesting	7/465	20/9983	2.07647e-05	0.00317493	0.00308411	Seita.2G046600/Seita.2G351600/Seita.2G352900/Seita.3G143800/Seita.4G139900/Seita.8G080900/Seita.9G177100	7
Ci409DEG	BP	GO:0055088	lipid homeostasis	18/1471	53/9983	0.000363407	0.0450434	0.0433069	Seita.1G063600/Seita.1G166600/Seita.1G373300/Seita.2G229900/Seita.2G277900/Seita.3G243700/Seita.4G194200/Seita.4G224700/Seita.5G232500/Seita.6G089500/Seita.7G199400/Seita.7G204200/Seita.7G318000/Seita.8G041200/Seita.9G021400/Seita.9G205600/Seita.9G205700/Seita.9G205800	18		Ci134down	CC	GO:0005871	kinesin complex	8/410	59/9955	0.00271454	0.0194953	0.0161054	Seita.1G252700/Seita.3G340900/Seita.4G085500/Seita.5G055100/Seita.6G237500/Seita.7G183000/Seita.7G248700/Seita.8G215500	8		Ci134down	BP	GO:0016311	dephosphorylation	24/465	222/9983	0.000102115	0.014194	0.013788	Seita.1G013900/Seita.1G323700/Seita.2G143400/Seita.2G188200/Seita.2G396200/Seita.3G166700/Seita.3G176900/Seita.3G405000/Seita.5G114700/Seita.5G236200/Seita.5G296200/Seita.6G128700/Seita.6G141700/Seita.7G307600/Seita.7G320900/Seita.8G024300/Seita.9G023200/Seita.9G205600/Seita.9G205800/Seita.9G337000/Seita.9G437300/Seita.9G458800/Seita.9G475100/Seita.9G475400	24
Ci409DEG	BP	GO:0072330	monocarboxylic acid biosynthetic process	51/1471	218/9983	0.000403776	0.0475446	0.0457117	Seita.1G219200/Seita.1G245800/Seita.1G371900/Seita.2G057100/Seita.2G185300/Seita.2G190100/Seita.2G290900/Seita.2G300900/Seita.2G400600/Seita.3G111200/Seita.3G183600/Seita.4G021600/Seita.4G078000/Seita.4G078100/Seita.4G078200/Seita.4G169900/Seita.4G267900/Seita.5G134800/Seita.5G151600/Seita.5G313600/Seita.6G011600/Seita.6G011900/Seita.6G012200/Seita.6G113700/Seita.6G125000/Seita.6G164700/Seita.7G0…	51		Ci134down	CC	GO:0005856	cytoskeleton	24/410	317/9955	0.0029371	0.0201766	0.0166682	Seita.1G005900/Seita.1G127700/Seita.1G235000/Seita.1G252700/Seita.1G310000/Seita.2G031200/Seita.3G046100/Seita.3G340900/Seita.4G069300/Seita.4G085500/Seita.5G055100/Seita.5G180900/Seita.5G369600/Seita.6G222800/Seita.6G237500/Seita.7G163400/Seita.7G183000/Seita.7G248700/Seita.8G215500/Seita.9G114600/Seita.9G115300/Seita.9G148700/Seita.9G475700/Seita.9G487900	24		Ci134down	BP	GO:0046839	phospholipid dephosphorylation	7/465	26/9983	0.000138104	0.0168016	0.016321	Seita.2G143400/Seita.3G405000/Seita.5G296200/Seita.7G307600/Seita.9G205600/Seita.9G205800/Seita.9G475400	7
Ci409DEG	BP	GO:0071669	plant-type cell wall organization or biogenesis	58/1471	257/9983	0.000451723	0.0497338	0.0478164	Seita.1G079000/Seita.1G123400/Seita.1G213900/Seita.1G309600/Seita.1G316700/Seita.2G044900/Seita.2G199800/Seita.2G200200/Seita.2G368200/Seita.2G382900/Seita.2G415500/Seita.3G003000/Seita.3G096400/Seita.3G190400/Seita.3G246700/Seita.3G270300/Seita.3G300900/Seita.3G337900/Seita.4G008800/Seita.4G115200/Seita.4G148700/Seita.4G223900/Seita.4G227100/Seita.4G271600/Seita.4G276800/Seita.5G046600/Seita.5G0…	58		Ci134down	CC	GO:0015630	microtubule cytoskeleton	18/410	221/9955	0.00447377	0.0294523	0.0243311	Seita.1G005900/Seita.1G127700/Seita.1G235000/Seita.1G252700/Seita.1G310000/Seita.2G031200/Seita.3G046100/Seita.3G340900/Seita.4G069300/Seita.4G085500/Seita.5G055100/Seita.6G222800/Seita.6G237500/Seita.7G183000/Seita.7G248700/Seita.8G215500/Seita.9G114600/Seita.9G475700	18		Ci134down	BP	GO:0042440	pigment metabolic process	20/465	172/9983	0.000142852	0.0168016	0.016321	Seita.1G057100/Seita.1G332100/Seita.2G270400/Seita.3G185800/Seita.3G270200/Seita.4G156200/Seita.5G040100/Seita.5G056800/Seita.5G365700/Seita.5G412600/Seita.5G461800/Seita.7G079000/Seita.7G116400/Seita.7G119400/Seita.7G157900/Seita.7G194300/Seita.8G104100/Seita.9G201900/Seita.9G308700/Seita.9G417900	20
Ci409DEG	BP	GO:0009624	response to nematode	26/1471	91/9983	0.000482053	0.0497338	0.0478164	Seita.1G028000/Seita.2G026700/Seita.2G090200/Seita.2G260700/Seita.2G368200/Seita.2G441700/Seita.3G209900/Seita.3G350700/Seita.5G039100/Seita.6G020900/Seita.7G039900/Seita.7G043900/Seita.7G064100/Seita.7G064200/Seita.7G076700/Seita.7G076800/Seita.7G107900/Seita.7G228200/Seita.7G298300/Seita.8G005600/Seita.9G275000/Seita.9G275500/Seita.9G275600/Seita.9G341200/Seita.9G416600/Seita.9G471700	26		Ci134down	CC	GO:0005875	microtubule associated complex	9/410	83/9955	0.00692359	0.0437571	0.0361484	Seita.1G252700/Seita.1G310000/Seita.3G340900/Seita.4G085500/Seita.5G055100/Seita.6G237500/Seita.7G183000/Seita.7G248700/Seita.8G215500	9		Ci134down	BP	GO:0080167	response to karrikin	17/465	136/9983	0.000186371	0.0203543	0.0197721	Seita.1G057100/Seita.1G332100/Seita.2G270400/Seita.2G335600/Seita.3G103400/Seita.3G270200/Seita.3G369800/Seita.5G056800/Seita.5G236200/Seita.5G386100/Seita.6G007700/Seita.6G166300/Seita.7G028400/Seita.7G079000/Seita.7G149800/Seita.9G023200/Seita.9G357300	17
Ci409DEG	BP	GO:0071555	cell wall organization	43/1471	177/9983	0.000485723	0.0497338	0.0478164	Seita.1G079000/Seita.1G112800/Seita.1G213900/Seita.1G287600/Seita.1G316700/Seita.2G044900/Seita.2G415500/Seita.3G096400/Seita.3G190400/Seita.3G246700/Seita.3G270300/Seita.3G300900/Seita.4G148700/Seita.4G271600/Seita.5G046600/Seita.5G047800/Seita.5G062700/Seita.5G153500/Seita.5G302300/Seita.5G328200/Seita.5G434700/Seita.5G463200/Seita.6G105300/Seita.7G203300/Seita.7G239900/Seita.7G277800/Seita.8G2…	43		Ci134down	MF	GO:0016722	oxidoreductase activity, oxidizing metal ions	10/386	36/8539	2.80457e-06	0.00104891	0.000932889	Seita.3G151800/Seita.3G218000/Seita.5G085900/Seita.5G365900/Seita.5G377700/Seita.5G378200/Seita.7G330200/Seita.8G018100/Seita.8G252500/Seita.9G453900	10		Ci134down	BP	GO:0098660	inorganic ion transmembrane transport	32/465	351/9983	0.000206267	0.0210255	0.020424	Seita.1G020100/Seita.1G028000/Seita.1G068700/Seita.1G278500/Seita.2G129100/Seita.2G330500/Seita.2G360800/Seita.2G374400/Seita.2G432200/Seita.3G112800/Seita.3G283100/Seita.3G357100/Seita.4G110300/Seita.4G160700/Seita.5G124100/Seita.5G298500/Seita.5G341100/Seita.5G444100/Seita.6G026600/Seita.6G141000/Seita.7G157900/Seita.7G194000/Seita.7G214000/Seita.7G316000/Seita.8G051100/Seita.9G182400/Seita.9G1…	32
Ci409DEG	CC	GO:0031226	intrinsic component of plasma membrane	90/1378	331/9955	6.13895e-11	1.82941e-08	1.77707e-08	Seita.1G025100/Seita.1G049200/Seita.1G116600/Seita.1G127700/Seita.1G135500/Seita.1G159600/Seita.1G213900/Seita.1G259900/Seita.1G286600/Seita.2G044900/Seita.2G049100/Seita.2G199400/Seita.2G260700/Seita.2G263300/Seita.3G076900/Seita.3G077500/Seita.3G146800/Seita.3G175800/Seita.3G217100/Seita.3G225200/Seita.3G235900/Seita.3G263500/Seita.3G263800/Seita.3G315000/Seita.3G333100/Seita.4G005300/Seita.4G0…	90		Ci134down	MF	GO:0004553	hydrolase activity, hydrolyzing O-glycosyl compounds	25/386	228/8539	3.40875e-05	0.00637436	0.00566929	Seita.1G092000/Seita.1G323700/Seita.2G044900/Seita.2G279000/Seita.2G327700/Seita.2G396200/Seita.2G439200/Seita.3G225200/Seita.3G263800/Seita.3G270400/Seita.4G234100/Seita.5G117400/Seita.5G356600/Seita.5G448400/Seita.6G011100/Seita.6G141700/Seita.7G234500/Seita.7G257800/Seita.8G079300/Seita.8G206900/Seita.8G230000/Seita.9G091600/Seita.9G290000/Seita.9G363400/Seita.9G479800	25		Ci134down	BP	GO:0009637	response to blue light	12/465	78/9983	0.000238309	0.0227734	0.0221219	Seita.1G203400/Seita.1G306100/Seita.2G351600/Seita.3G126900/Seita.4G139900/Seita.5G279700/Seita.7G018400/Seita.7G119400/Seita.7G303000/Seita.8G012100/Seita.8G080900/Seita.9G504100	12
Ci409DEG	CC	GO:0005618	cell wall	115/1378	490/9955	2.72942e-09	3.07618e-07	2.98816e-07	Seita.1G079000/Seita.1G162600/Seita.1G162700/Seita.1G162800/Seita.1G180600/Seita.1G210300/Seita.1G213900/Seita.1G248900/Seita.1G287600/Seita.1G295700/Seita.1G316400/Seita.1G316700/Seita.1G340400/Seita.1G344700/Seita.1G378600/Seita.2G027000/Seita.2G069000/Seita.2G069100/Seita.2G109700/Seita.2G133900/Seita.2G134000/Seita.2G188200/Seita.2G193900/Seita.2G199400/Seita.2G218700/Seita.2G387800/Seita.2G3…	115		Ci134down	MF	GO:0016746	transferase activity, transferring acyl groups	23/386	209/8539	6.63778e-05	0.0082751	0.00735979	Seita.1G116700/Seita.1G230100/Seita.1G304800/Seita.1G349600/Seita.1G369500/Seita.2G005900/Seita.3G097400/Seita.3G142500/Seita.3G218600/Seita.3G332700/Seita.4G226600/Seita.5G027600/Seita.5G104100/Seita.5G246600/Seita.7G155700/Seita.8G128800/Seita.8G243500/Seita.9G037100/Seita.9G260200/Seita.9G440600/Seita.9G441000/Seita.9G470700/Seita.9G487500	23		Ci134down	BP	GO:0005984	disaccharide metabolic process	9/465	49/9983	0.00037137	0.0334014	0.032446	Seita.1G323700/Seita.2G188200/Seita.2G396200/Seita.2G422000/Seita.3G176900/Seita.5G157600/Seita.6G141700/Seita.9G458800/Seita.9G532500	9
Ci409DEG	CC	GO:0030312	external encapsulating structure	115/1378	491/9955	3.09682e-09	3.07618e-07	2.98816e-07	Seita.1G079000/Seita.1G162600/Seita.1G162700/Seita.1G162800/Seita.1G180600/Seita.1G210300/Seita.1G213900/Seita.1G248900/Seita.1G287600/Seita.1G295700/Seita.1G316400/Seita.1G316700/Seita.1G340400/Seita.1G344700/Seita.1G378600/Seita.2G027000/Seita.2G069000/Seita.2G069100/Seita.2G109700/Seita.2G133900/Seita.2G134000/Seita.2G188200/Seita.2G193900/Seita.2G199400/Seita.2G218700/Seita.2G387800/Seita.2G3…	115		Ci134down	MF	GO:0016798	hydrolase activity, acting on glycosyl bonds	25/386	249/8539	0.00014449	0.0135098	0.0120154	Seita.1G092000/Seita.1G323700/Seita.2G044900/Seita.2G279000/Seita.2G327700/Seita.2G396200/Seita.2G439200/Seita.3G225200/Seita.3G263800/Seita.3G270400/Seita.4G234100/Seita.5G117400/Seita.5G356600/Seita.5G448400/Seita.6G011100/Seita.6G141700/Seita.7G234500/Seita.7G257800/Seita.8G079300/Seita.8G206900/Seita.8G230000/Seita.9G091600/Seita.9G290000/Seita.9G363400/Seita.9G479800	25		Ci134down	BP	GO:0046351	disaccharide biosynthetic process	6/465	23/9983	0.000506694	0.0430408	0.0418096	Seita.1G323700/Seita.2G188200/Seita.2G396200/Seita.3G176900/Seita.6G141700/Seita.9G458800	6
Ci409DEG	CC	GO:0046658	anchored component of plasma membrane	36/1378	119/9955	2.58353e-06	0.000192473	0.000186966	Seita.1G127700/Seita.1G159600/Seita.1G213900/Seita.2G044900/Seita.2G199400/Seita.2G263300/Seita.3G146800/Seita.3G175800/Seita.3G217100/Seita.3G225200/Seita.3G263500/Seita.3G263800/Seita.3G315000/Seita.4G022300/Seita.4G169700/Seita.5G328200/Seita.5G343700/Seita.5G392200/Seita.5G448000/Seita.5G448500/Seita.5G450000/Seita.6G101500/Seita.6G153100/Seita.6G224400/Seita.7G099100/Seita.8G079300/Seita.8G2…	36		Ci134down	MF	GO:0015020	glucuronosyltransferase activity	5/386	14/8539	0.000262426	0.0196295	0.0174582	Seita.3G158400/Seita.3G158500/Seita.3G217800/Seita.3G235400/Seita.5G437300	5		Ci134down	BP	GO:0015711	organic anion transport	22/465	219/9983	0.000553011	0.044496	0.0432232	Seita.2G106700/Seita.2G141700/Seita.2G335600/Seita.2G352700/Seita.2G360800/Seita.3G102000/Seita.3G223500/Seita.4G005300/Seita.4G083300/Seita.4G227300/Seita.4G231500/Seita.5G121600/Seita.5G127600/Seita.5G145600/Seita.5G229200/Seita.5G242900/Seita.5G365100/Seita.5G387200/Seita.6G118800/Seita.9G306500/Seita.9G311800/Seita.9G440400	22
Ci409DEG	CC	GO:0005887	integral component of plasma membrane	54/1378	211/9955	3.36849e-06	0.000200762	0.000195018	Seita.1G025100/Seita.1G049200/Seita.1G116600/Seita.1G135500/Seita.1G259900/Seita.1G286600/Seita.2G049100/Seita.2G260700/Seita.3G076900/Seita.3G077500/Seita.3G235900/Seita.3G333100/Seita.4G005300/Seita.4G006500/Seita.4G015100/Seita.4G051900/Seita.4G089800/Seita.4G140700/Seita.4G160700/Seita.4G180100/Seita.4G257500/Seita.4G276500/Seita.5G007400/Seita.5G043400/Seita.5G104100/Seita.5G250400/Seita.5G3…	54		Ci134down	MF	GO:0004805	trehalose-phosphatase activity	4/386	11/8539	0.00105298	0.0384841	0.0342273	Seita.1G262000/Seita.1G323700/Seita.2G396200/Seita.6G141700	4		Ci134down	BP	GO:0009311	oligosaccharide metabolic process	11/465	74/9983	0.000582028	0.044496	0.0432232	Seita.1G323700/Seita.2G188200/Seita.2G396200/Seita.2G422000/Seita.3G176900/Seita.5G157600/Seita.5G388900/Seita.6G141700/Seita.7G159600/Seita.9G458800/Seita.9G532500	11
Ci409DEG	CC	GO:0031225	anchored component of membrane	40/1378	142/9955	5.29777e-06	0.00024997	0.000242818	Seita.1G127700/Seita.1G159600/Seita.1G213900/Seita.2G044900/Seita.2G199400/Seita.2G263300/Seita.3G102200/Seita.3G146800/Seita.3G175800/Seita.3G217100/Seita.3G225200/Seita.3G263500/Seita.3G263800/Seita.3G315000/Seita.4G022300/Seita.4G105900/Seita.4G169700/Seita.5G328200/Seita.5G343700/Seita.5G392200/Seita.5G448000/Seita.5G448500/Seita.5G450000/Seita.6G101500/Seita.6G153100/Seita.6G224400/Seita.7G0…	40		Ci134down	MF	GO:0016747	transferase activity, transferring acyl groups other than amino-acyl groups	19/386	192/8539	0.00106613	0.0384841	0.0342273	Seita.1G116700/Seita.1G230100/Seita.1G304800/Seita.1G349600/Seita.1G369500/Seita.2G005900/Seita.3G097400/Seita.3G142500/Seita.3G218600/Seita.4G226600/Seita.5G246600/Seita.7G155700/Seita.8G128800/Seita.9G037100/Seita.9G260200/Seita.9G440600/Seita.9G441000/Seita.9G470700/Seita.9G487500	19		Ci134down	BP	GO:0009638	phototropism	5/465	16/9983	0.000611214	0.0445022	0.0432292	Seita.1G203400/Seita.7G018400/Seita.7G119400/Seita.7G303000/Seita.8G012100	5
Ci409DEG	CC	GO:0009505	plant-type cell wall	55/1378	220/9955	5.87177e-06	0.00024997	0.000242818	Seita.1G079000/Seita.1G210300/Seita.1G213900/Seita.1G287600/Seita.1G316700/Seita.1G340400/Seita.1G344700/Seita.2G027000/Seita.2G069000/Seita.2G069100/Seita.2G199400/Seita.2G218700/Seita.3G071300/Seita.3G071400/Seita.3G146800/Seita.3G162000/Seita.3G190400/Seita.3G270300/Seita.4G021600/Seita.4G022300/Seita.4G160700/Seita.4G169700/Seita.4G284800/Seita.5G046600/Seita.5G053100/Seita.5G053200/Seita.5G1…	55		Ci134down	MF	GO:0008236	serine-type peptidase activity	9/386	59/8539	0.00121168	0.0384841	0.0342273	Seita.1G046800/Seita.1G116400/Seita.3G131400/Seita.5G157900/Seita.5G303900/Seita.7G203700/Seita.8G097000/Seita.9G262900/Seita.9G377000	9		Ci134down	BP	GO:0009636	response to toxic substance	24/465	252/9983	0.000683646	0.0475134	0.0461543	Seita.1G206500/Seita.1G245800/Seita.2G312300/Seita.2G352900/Seita.2G444000/Seita.3G016700/Seita.3G097200/Seita.5G046600/Seita.5G157600/Seita.5G171000/Seita.5G174100/Seita.5G263000/Seita.5G328300/Seita.6G053800/Seita.7G141400/Seita.7G194000/Seita.7G225300/Seita.7G279700/Seita.7G301200/Seita.8G013500/Seita.9G205600/Seita.9G205800/Seita.9G237000/Seita.9G475100	24
Ci409DEG	CC	GO:0005576	extracellular region	79/1378	384/9955	0.000140621	0.00523814	0.00508827	Seita.1G002800/Seita.1G162600/Seita.1G162700/Seita.1G162800/Seita.1G245800/Seita.1G295700/Seita.1G324300/Seita.1G331300/Seita.1G332000/Seita.1G340400/Seita.2G033500/Seita.2G044900/Seita.2G109700/Seita.2G156300/Seita.2G168000/Seita.2G188200/Seita.2G336500/Seita.2G396200/Seita.2G401000/Seita.3G097400/Seita.3G175800/Seita.3G263500/Seita.3G263800/Seita.3G280100/Seita.3G315000/Seita.3G397200/Seita.4G0…	79		Ci134down	MF	GO:0016825	hydrolase activity, acting on acid phosphorus-nitrogen bonds	9/386	59/8539	0.00121168	0.0384841	0.0342273	Seita.1G046800/Seita.1G116400/Seita.3G131400/Seita.5G157900/Seita.5G303900/Seita.7G203700/Seita.8G097000/Seita.9G262900/Seita.9G377000	9		Ci134down	CC	GO:0034357	photosynthetic membrane	40/436	244/9955	2.86578e-13	1.65628e-11	1.51915e-11	Seita.1G251800/Seita.2G029500/Seita.2G046600/Seita.2G066600/Seita.2G163700/Seita.2G202200/Seita.2G248100/Seita.2G283000/Seita.2G330500/Seita.2G343000/Seita.2G351600/Seita.2G352900/Seita.3G143800/Seita.3G158600/Seita.4G139900/Seita.4G207000/Seita.5G040100/Seita.5G172700/Seita.5G215600/Seita.5G240000/Seita.5G326400/Seita.5G336700/Seita.5G404400/Seita.5G461800/Seita.6G082000/Seita.6G105200/Seita.6G1…	40
Ci409DEG	CC	GO:0048046	apoplast	50/1378	226/9955	0.000414379	0.0137205	0.013328	Seita.1G245800/Seita.1G324300/Seita.1G331300/Seita.1G340400/Seita.2G033500/Seita.2G044900/Seita.2G109700/Seita.2G168000/Seita.2G401000/Seita.3G175800/Seita.3G263500/Seita.3G263800/Seita.3G315000/Seita.3G397200/Seita.4G191200/Seita.4G232000/Seita.4G245500/Seita.4G267900/Seita.4G276800/Seita.4G281500/Seita.5G014300/Seita.5G185300/Seita.5G324500/Seita.5G329900/Seita.5G330000/Seita.5G448000/Seita.5G4…	50		Ci134down	MF	GO:0017171	serine hydrolase activity	9/386	59/8539	0.00121168	0.0384841	0.0342273	Seita.1G046800/Seita.1G116400/Seita.3G131400/Seita.5G157900/Seita.5G303900/Seita.7G203700/Seita.8G097000/Seita.9G262900/Seita.9G377000	9		Ci134down	CC	GO:0042651	thylakoid membrane	40/436	244/9955	2.86578e-13	1.65628e-11	1.51915e-11	Seita.1G251800/Seita.2G029500/Seita.2G046600/Seita.2G066600/Seita.2G163700/Seita.2G202200/Seita.2G248100/Seita.2G283000/Seita.2G330500/Seita.2G343000/Seita.2G351600/Seita.2G352900/Seita.3G143800/Seita.3G158600/Seita.4G139900/Seita.4G207000/Seita.5G040100/Seita.5G172700/Seita.5G215600/Seita.5G240000/Seita.5G326400/Seita.5G336700/Seita.5G404400/Seita.5G461800/Seita.6G082000/Seita.6G105200/Seita.6G1…	40
Ci409DEG	MF	GO:0004497	monooxygenase activity	51/1283	167/8539	2.2327e-07	7.9756e-05	7.38316e-05	Seita.1G019400/Seita.1G166600/Seita.1G260600/Seita.1G373300/Seita.2G145700/Seita.2G145800/Seita.2G145900/Seita.2G219600/Seita.2G219700/Seita.2G224300/Seita.2G229900/Seita.2G283800/Seita.3G298400/Seita.4G036200/Seita.4G145700/Seita.4G216300/Seita.4G224700/Seita.4G235500/Seita.4G235600/Seita.5G040100/Seita.5G386300/Seita.6G023100/Seita.6G089500/Seita.6G100500/Seita.6G101900/Seita.6G132000/Seita.6G1…	51		Ci134down	MF	GO:0070008	serine-type exopeptidase activity	6/386	28/8539	0.00132478	0.0384841	0.0342273	Seita.1G116400/Seita.3G131400/Seita.5G157900/Seita.8G097000/Seita.9G262900/Seita.9G377000	6		Ci134down	CC	GO:0055035	plastid thylakoid membrane	39/436	233/9955	2.90576e-13	1.65628e-11	1.51915e-11	Seita.1G251800/Seita.2G029500/Seita.2G046600/Seita.2G066600/Seita.2G163700/Seita.2G202200/Seita.2G248100/Seita.2G283000/Seita.2G330500/Seita.2G343000/Seita.2G351600/Seita.2G352900/Seita.3G143800/Seita.4G139900/Seita.4G207000/Seita.5G040100/Seita.5G172700/Seita.5G215600/Seita.5G240000/Seita.5G326400/Seita.5G336700/Seita.5G404400/Seita.5G461800/Seita.6G082000/Seita.6G105200/Seita.6G127500/Seita.6G2…	39
Ci409DEG	MF	GO:0016709	oxidoreductase activity, acting on paired donors, with incorporation or reduction of molecular oxygen, NAD(P)H as one donor, and incorporation of one atom of oxygen	36/1283	102/8539	2.82823e-07	7.9756e-05	7.38316e-05	Seita.1G019400/Seita.2G145700/Seita.2G145800/Seita.2G145900/Seita.2G219600/Seita.2G219700/Seita.2G224300/Seita.2G229900/Seita.2G283800/Seita.3G298400/Seita.4G145700/Seita.4G216300/Seita.4G235500/Seita.4G235600/Seita.5G040100/Seita.6G023100/Seita.6G089500/Seita.6G100500/Seita.6G101900/Seita.6G132000/Seita.6G176900/Seita.6G237000/Seita.7G096800/Seita.7G116400/Seita.7G139200/Seita.8G014200/Seita.8G0…	36		Ci134down	MF	GO:0030247	polysaccharide binding	9/386	60/8539	0.00136991	0.0384841	0.0342273	Seita.1G092000/Seita.2G044900/Seita.2G327700/Seita.3G225200/Seita.3G263800/Seita.5G448400/Seita.8G079300/Seita.9G363400/Seita.9G479800	9		Ci134down	CC	GO:0009535	chloroplast thylakoid membrane	38/436	227/9955	5.93711e-13	2.33451e-11	2.14123e-11	Seita.1G251800/Seita.2G029500/Seita.2G046600/Seita.2G066600/Seita.2G163700/Seita.2G202200/Seita.2G248100/Seita.2G283000/Seita.2G330500/Seita.2G343000/Seita.2G351600/Seita.2G352900/Seita.3G143800/Seita.4G139900/Seita.4G207000/Seita.5G040100/Seita.5G172700/Seita.5G215600/Seita.5G240000/Seita.5G326400/Seita.5G336700/Seita.5G404400/Seita.5G461800/Seita.6G082000/Seita.6G105200/Seita.6G127500/Seita.6G2…	38
Ci409DEG	MF	GO:0004553	hydrolase activity, hydrolyzing O-glycosyl compounds	63/1283	228/8539	4.98882e-07	9.37897e-05	8.68229e-05	Seita.1G098300/Seita.1G098500/Seita.2G044900/Seita.2G081000/Seita.2G188200/Seita.2G237100/Seita.2G263300/Seita.2G396200/Seita.3G175800/Seita.3G225200/Seita.3G263500/Seita.3G263800/Seita.3G280100/Seita.3G288600/Seita.3G300900/Seita.3G315000/Seita.4G022300/Seita.4G148700/Seita.4G169700/Seita.4G191200/Seita.4G286000/Seita.5G157600/Seita.5G258600/Seita.5G316000/Seita.5G328200/Seita.5G399300/Seita.5G4…	63		Ci134down	MF	GO:0015171	amino acid transmembrane transporter activity	9/386	61/8539	0.00154436	0.0384841	0.0342273	Seita.1G333100/Seita.3G223500/Seita.4G005300/Seita.4G006500/Seita.4G006600/Seita.5G387200/Seita.7G298300/Seita.9G299000/Seita.9G311800	9		Ci134down	CC	GO:0031976	plastid thylakoid	44/436	297/9955	6.82606e-13	2.33451e-11	2.14123e-11	Seita.1G251800/Seita.2G029500/Seita.2G046600/Seita.2G066600/Seita.2G163700/Seita.2G202200/Seita.2G248100/Seita.2G283000/Seita.2G330500/Seita.2G343000/Seita.2G351600/Seita.2G352900/Seita.3G143800/Seita.4G139900/Seita.4G207000/Seita.5G040100/Seita.5G172700/Seita.5G215600/Seita.5G229200/Seita.5G240000/Seita.5G242900/Seita.5G326400/Seita.5G336700/Seita.5G404400/Seita.5G461800/Seita.6G082000/Seita.6G1…	44
Ci409DEG	MF	GO:0016798	hydrolase activity, acting on glycosyl bonds	66/1283	249/8539	1.36071e-06	0.00019186	0.000177608	Seita.1G098300/Seita.1G098500/Seita.2G044900/Seita.2G081000/Seita.2G133200/Seita.2G188200/Seita.2G237100/Seita.2G263300/Seita.2G396200/Seita.3G175800/Seita.3G225200/Seita.3G263500/Seita.3G263800/Seita.3G280100/Seita.3G288600/Seita.3G300900/Seita.3G315000/Seita.4G022300/Seita.4G148700/Seita.4G169700/Seita.4G191200/Seita.4G286000/Seita.5G157600/Seita.5G258600/Seita.5G316000/Seita.5G328200/Seita.5G3…	66		Ci134down	MF	GO:0015179	L-amino acid transmembrane transporter activity	6/386	29/8539	0.00160773	0.0384841	0.0342273	Seita.1G333100/Seita.4G005300/Seita.4G006500/Seita.4G006600/Seita.9G299000/Seita.9G311800	6		Ci134down	CC	GO:0009534	chloroplast thylakoid	43/436	293/9955	1.7617e-12	5.02086e-11	4.60516e-11	Seita.1G251800/Seita.2G029500/Seita.2G046600/Seita.2G066600/Seita.2G163700/Seita.2G202200/Seita.2G248100/Seita.2G283000/Seita.2G330500/Seita.2G343000/Seita.2G351600/Seita.2G352900/Seita.3G143800/Seita.4G139900/Seita.4G207000/Seita.5G040100/Seita.5G172700/Seita.5G215600/Seita.5G229200/Seita.5G240000/Seita.5G242900/Seita.5G326400/Seita.5G336700/Seita.5G404400/Seita.5G461800/Seita.6G082000/Seita.6G1…	43
Ci409DEG	MF	GO:0016705	oxidoreductase activity, acting on paired donors, with incorporation or reduction of molecular oxygen	47/1283	162/8539	3.30519e-06	0.000372825	0.000345131	Seita.1G019400/Seita.2G145700/Seita.2G145800/Seita.2G145900/Seita.2G219600/Seita.2G219700/Seita.2G224300/Seita.2G229900/Seita.2G283800/Seita.3G298400/Seita.4G015600/Seita.4G015700/Seita.4G145700/Seita.4G216300/Seita.4G235500/Seita.4G235600/Seita.5G040100/Seita.5G157700/Seita.5G323400/Seita.5G386300/Seita.5G404900/Seita.6G023100/Seita.6G089500/Seita.6G100500/Seita.6G101900/Seita.6G132000/Seita.6G1…	47		Ci134down	MF	GO:0008509	anion transmembrane transporter activity	22/386	245/8539	0.00160884	0.0384841	0.0342273	Seita.1G241300/Seita.1G333100/Seita.1G360400/Seita.2G352700/Seita.3G223500/Seita.3G283100/Seita.3G283600/Seita.4G005300/Seita.4G006500/Seita.4G006600/Seita.4G231500/Seita.5G198500/Seita.5G326900/Seita.5G387200/Seita.5G461300/Seita.6G058300/Seita.7G169400/Seita.7G298300/Seita.9G136100/Seita.9G299000/Seita.9G311800/Seita.9G506300	22		Ci134down	CC	GO:0009579	thylakoid	45/436	359/9955	1.27279e-10	3.10925e-09	2.85182e-09	Seita.1G251800/Seita.2G029500/Seita.2G046600/Seita.2G066600/Seita.2G163700/Seita.2G202200/Seita.2G248100/Seita.2G283000/Seita.2G330500/Seita.2G343000/Seita.2G351600/Seita.2G352900/Seita.3G143800/Seita.3G158600/Seita.4G139900/Seita.4G207000/Seita.5G040100/Seita.5G172700/Seita.5G215600/Seita.5G229200/Seita.5G240000/Seita.5G242900/Seita.5G326400/Seita.5G336700/Seita.5G404400/Seita.5G461800/Seita.6G0…	45
Ci409DEG	MF	GO:0008236	serine-type peptidase activity	22/1283	59/8539	2.15814e-05	0.00152149	0.00140847	Seita.1G046800/Seita.1G340400/Seita.2G069000/Seita.2G069100/Seita.2G109700/Seita.2G218700/Seita.2G227100/Seita.2G246500/Seita.5G157800/Seita.5G158000/Seita.5G370200/Seita.7G203700/Seita.7G206300/Seita.7G269800/Seita.7G277500/Seita.8G097000/Seita.8G134300/Seita.9G262900/Seita.9G340500/Seita.9G376900/Seita.9G377000/Seita.9G377100	22		Ci134down	MF	GO:0015075	ion transmembrane transporter activity	37/386	495/8539	0.00164638	0.0384841	0.0342273	Seita.1G020100/Seita.1G141800/Seita.1G241300/Seita.1G333100/Seita.1G360400/Seita.2G352700/Seita.3G193100/Seita.3G208000/Seita.3G223500/Seita.3G233000/Seita.3G283100/Seita.3G283600/Seita.4G005300/Seita.4G006500/Seita.4G006600/Seita.4G181500/Seita.4G231500/Seita.5G198500/Seita.5G326900/Seita.5G387200/Seita.5G461300/Seita.6G001600/Seita.6G058300/Seita.7G120800/Seita.7G169400/Seita.7G194000/Seita.7G2…	37		Ci134down	CC	GO:0010287	plastoglobule	13/436	47/9955	6.57745e-08	1.40593e-06	1.28953e-06	Seita.2G029500/Seita.2G351600/Seita.2G352900/Seita.3G143800/Seita.4G139900/Seita.7G056200/Seita.8G080900/Seita.8G173800/Seita.9G124200/Seita.9G177100/Seita.9G191500/Seita.9G195600/Seita.9G195900	13
Ci409DEG	MF	GO:0016825	hydrolase activity, acting on acid phosphorus-nitrogen bonds	22/1283	59/8539	2.15814e-05	0.00152149	0.00140847	Seita.1G046800/Seita.1G340400/Seita.2G069000/Seita.2G069100/Seita.2G109700/Seita.2G218700/Seita.2G227100/Seita.2G246500/Seita.5G157800/Seita.5G158000/Seita.5G370200/Seita.7G203700/Seita.7G206300/Seita.7G269800/Seita.7G277500/Seita.8G097000/Seita.8G134300/Seita.9G262900/Seita.9G340500/Seita.9G376900/Seita.9G377000/Seita.9G377100	22		Ci134down	MF	GO:0046556	alpha-L-arabinofuranosidase activity	4/386	13/8539	0.00212277	0.0467009	0.0415353	Seita.2G439200/Seita.7G257800/Seita.8G206900/Seita.8G230000	4		Ci134down	CC	GO:0009941	chloroplast envelope	42/436	430/9955	7.70403e-07	1.46377e-05	1.34257e-05	Seita.1G206500/Seita.1G253900/Seita.1G354800/Seita.1G380300/Seita.2G029500/Seita.2G046600/Seita.2G141700/Seita.2G209700/Seita.2G235900/Seita.2G248100/Seita.2G283000/Seita.2G312300/Seita.2G330500/Seita.2G351600/Seita.2G352900/Seita.2G401000/Seita.3G102000/Seita.3G143800/Seita.4G139900/Seita.4G160700/Seita.5G002900/Seita.5G040100/Seita.5G121600/Seita.5G145600/Seita.5G240000/Seita.5G242900/Seita.5G3…	42
Ci409DEG	MF	GO:0017171	serine hydrolase activity	22/1283	59/8539	2.15814e-05	0.00152149	0.00140847	Seita.1G046800/Seita.1G340400/Seita.2G069000/Seita.2G069100/Seita.2G109700/Seita.2G218700/Seita.2G227100/Seita.2G246500/Seita.5G157800/Seita.5G158000/Seita.5G370200/Seita.7G203700/Seita.7G206300/Seita.7G269800/Seita.7G277500/Seita.8G097000/Seita.8G134300/Seita.9G262900/Seita.9G340500/Seita.9G376900/Seita.9G377000/Seita.9G377100	22		Ci603down	BP	GO:0009734	auxin-activated signaling pathway	28/518	142/9983	6.95116e-10	1.15667e-06	1.08219e-06	Seita.1G116500/Seita.1G116600/Seita.1G317400/Seita.1G324100/Seita.1G333100/Seita.2G166600/Seita.3G244500/Seita.3G379400/Seita.3G393100/Seita.4G005300/Seita.4G006500/Seita.4G006600/Seita.4G083300/Seita.4G101300/Seita.4G288100/Seita.5G079300/Seita.5G126200/Seita.5G241500/Seita.5G351800/Seita.6G251100/Seita.6G253500/Seita.7G123300/Seita.7G141400/Seita.7G224300/Seita.7G258700/Seita.7G313600/Seita.9G1…	28		Ci134down	CC	GO:0009526	plastid envelope	42/436	451/9955	2.686e-06	4.59305e-05	4.21277e-05	Seita.1G206500/Seita.1G253900/Seita.1G354800/Seita.1G380300/Seita.2G029500/Seita.2G046600/Seita.2G141700/Seita.2G209700/Seita.2G235900/Seita.2G248100/Seita.2G283000/Seita.2G312300/Seita.2G330500/Seita.2G351600/Seita.2G352900/Seita.2G401000/Seita.3G102000/Seita.3G143800/Seita.4G139900/Seita.4G160700/Seita.5G002900/Seita.5G040100/Seita.5G121600/Seita.5G145600/Seita.5G240000/Seita.5G242900/Seita.5G3…	42
Ci409DEG	MF	GO:0016151	nickel cation binding	7/1283	10/8539	0.000134458	0.00842606	0.00780016	Seita.5G166200/Seita.5G166300/Seita.6G036000/Seita.6G036100/Seita.6G208500/Seita.8G115200/Seita.8G115400	7		Ci603down	BP	GO:0071365	cellular response to auxin stimulus	29/518	159/9983	2.32913e-09	1.93783e-06	1.81304e-06	Seita.1G116500/Seita.1G116600/Seita.1G317400/Seita.1G324100/Seita.1G333100/Seita.2G166600/Seita.3G244500/Seita.3G379400/Seita.3G393100/Seita.4G005300/Seita.4G006500/Seita.4G006600/Seita.4G083300/Seita.4G101300/Seita.4G288100/Seita.5G079300/Seita.5G126200/Seita.5G241500/Seita.5G351800/Seita.5G403700/Seita.6G251100/Seita.6G253500/Seita.7G123300/Seita.7G141400/Seita.7G224300/Seita.7G258700/Seita.7G3…	29		Ci134down	CC	GO:0009528	plastid inner membrane	8/436	44/9955	0.000560311	0.0087103	0.00798913	Seita.2G209700/Seita.3G102000/Seita.5G040100/Seita.5G121600/Seita.5G362100/Seita.5G461800/Seita.7G217800/Seita.9G306500	8
[truncated: 487 more rows]
