# Supplementary material for: Response of Multiple Tissues to Drought Revealed by a Weighted Gene Co-Expression Network Analysis in Foxtail Millet [Setaria italica (L.) P. Beauv.]
Source: Front Plant Sci. 2022 Jan 12;12:746166. doi: 10.3389/fpls.2021.746166 (PMC8790073; doi:10.3389/fpls.2021.746166)
Supplement: Supplementary Table S6 — A list of GO and KEGG categories of genotype-specific DEGs. [file Table_6.XLSX]

## Sheet: Supplementary Table S6
Supplementary Table S6: List of GO and KEGG categories of genotype-specific DEGs
GO enrichment												KEGG enrichment
Tissue	Cluster	GO_ID	Description	GeneRatio	BgRatio	pvalue	p.adjust	qvalue	geneID	Count		Tissue	Cluster	KEGG_ID	Description	GeneRatio	BgRatio	pvalue	p.adjust	qvalue	geneID	Count
Root	AllShare	GO:0009636	response to toxic substance	34/551	252/9983	1.08393e-06	0.00118826	0.00113266	Seita.1G012200/Seita.1G045200/Seita.1G192100/Seita.2G033500/Seita.2G324100/Seita.2G406500/Seita.3G096900/Seita.3G097200/Seita.3G190400/Seita.4G067200/Seita.5G015400/Seita.5G207000/Seita.5G346500/Seita.5G421200/Seita.5G463200/Seita.7G020900/Seita.7G141400/Seita.7G193900/Seita.7G225300/Seita.7G231200/Seita.7G277800/Seita.7G331800/Seita.8G053300/Seita.8G153700/Seita.9G064400/Seita.9G157600/Seita.9G2…	34		Root	AllShare	sita00940	Phenylpropanoid biosynthesis	36/320	282/5494	4.95857e-06	0.000381941	0.000319148	Seita.1G022400/Seita.1G240600/Seita.1G281400/Seita.2G406500/Seita.2G407300/Seita.2G430900/Seita.2G431500/Seita.2G431600/Seita.3G004800/Seita.3G052900/Seita.3G190400/Seita.3G234900/Seita.3G235000/Seita.4G135100/Seita.4G139700/Seita.5G029700/Seita.5G170000/Seita.5G334800/Seita.5G463200/Seita.6G164300/Seita.6G224300/Seita.7G029200/Seita.7G047600/Seita.7G265300/Seita.7G271100/Seita.7G277800/Seita.9G0…	36
Root	AllShare	GO:0032787	monocarboxylic acid metabolic process	47/551	411/9983	1.36034e-06	0.00118826	0.00113266	Seita.1G069500/Seita.1G103700/Seita.1G371900/Seita.2G187800/Seita.2G187900/Seita.2G300900/Seita.2G360500/Seita.3G056400/Seita.3G096900/Seita.3G097200/Seita.3G111200/Seita.3G165200/Seita.3G170100/Seita.3G245500/Seita.3G346200/Seita.4G021600/Seita.4G078000/Seita.4G156800/Seita.4G169900/Seita.4G267900/Seita.5G071800/Seita.5G134800/Seita.5G313600/Seita.5G386300/Seita.5G434700/Seita.6G011600/Seita.6G0…	47		Root	AllShare	sita00010	Glycolysis / Gluconeogenesis	25/320	165/5494	7.87508e-06	0.000381941	0.000319148	Seita.1G221800/Seita.1G307000/Seita.1G314800/Seita.3G111200/Seita.4G093100/Seita.4G108300/Seita.4G267900/Seita.5G113700/Seita.5G134800/Seita.5G313600/Seita.5G377300/Seita.5G380500/Seita.7G122900/Seita.7G123000/Seita.7G283900/Seita.7G315100/Seita.8G024300/Seita.8G099100/Seita.9G027100/Seita.9G036700/Seita.9G203200/Seita.9G416100/Seita.9G458800/Seita.9G510900/Seita.9G511000	25
Root	AllShare	GO:0009414	response to water deprivation	40/551	340/9983	4.27051e-06	0.00186515	0.00177788	Seita.1G103700/Seita.1G127700/Seita.1G161800/Seita.1G324300/Seita.2G033500/Seita.2G406500/Seita.3G162400/Seita.3G337900/Seita.4G021600/Seita.4G041500/Seita.4G082000/Seita.4G112000/Seita.5G044000/Seita.5G046700/Seita.5G093200/Seita.5G119800/Seita.5G166200/Seita.5G166300/Seita.6G114000/Seita.6G164700/Seita.6G178100/Seita.7G094300/Seita.7G168500/Seita.7G184600/Seita.7G228200/Seita.7G283900/Seita.8G1…	40		Root	AllShare	sita00052	Galactose metabolism	13/320	65/5494	7.26414e-05	0.00234874	0.00196259	Seita.1G112800/Seita.2G081000/Seita.3G111200/Seita.5G119800/Seita.5G134800/Seita.5G313600/Seita.6G195300/Seita.7G122900/Seita.7G123000/Seita.7G181300/Seita.8G228200/Seita.9G043300/Seita.9G208200	13
Root	AllShare	GO:0055082	cellular chemical homeostasis	22/551	144/9983	1.22638e-05	0.00428498	0.0040845	Seita.1G274100/Seita.3G030500/Seita.3G049900/Seita.3G051000/Seita.4G138500/Seita.4G159500/Seita.5G103100/Seita.5G134800/Seita.5G232500/Seita.5G313600/Seita.5G325800/Seita.6G123500/Seita.7G088700/Seita.7G218000/Seita.7G331800/Seita.8G118200/Seita.9G205600/Seita.9G205700/Seita.9G205800/Seita.9G475100/Seita.9G475300/Seita.9G533500	22		Root	AllShare	sita00904	Diterpenoid biosynthesis	9/320	35/5494	0.000126326	0.00306341	0.00255977	Seita.2G144900/Seita.2G145800/Seita.2G145900/Seita.4G235500/Seita.5G157700/Seita.5G323400/Seita.5G404900/Seita.6G023100/Seita.6G100500	9
Root	AllShare	GO:0006979	response to oxidative stress	41/551	380/9983	2.67678e-05	0.00779389	0.00742924	Seita.1G012200/Seita.1G045200/Seita.1G192100/Seita.1G210300/Seita.1G257600/Seita.1G272900/Seita.2G033500/Seita.2G077200/Seita.2G081000/Seita.2G156100/Seita.2G396200/Seita.3G111700/Seita.3G368800/Seita.4G067200/Seita.4G169900/Seita.5G046700/Seita.5G047800/Seita.5G104100/Seita.5G119800/Seita.5G207000/Seita.5G232500/Seita.5G421200/Seita.5G456800/Seita.6G036100/Seita.7G141400/Seita.7G168500/Seita.7G2…	41		Root	AllShare	sita00531	Glycosaminoglycan degradation	6/320	17/5494	0.000266565	0.00517137	0.00432116	Seita.1G354100/Seita.2G365000/Seita.4G053700/Seita.5G440300/Seita.5G440400/Seita.9G399100	6
Root	AllShare	GO:0048878	chemical homeostasis	35/551	327/9983	0.000122284	0.0279455	0.026638	Seita.1G019500/Seita.1G256100/Seita.1G263000/Seita.1G274100/Seita.2G229900/Seita.2G277900/Seita.2G309200/Seita.3G030500/Seita.3G049900/Seita.3G051000/Seita.3G391700/Seita.4G138500/Seita.4G159500/Seita.5G103100/Seita.5G134800/Seita.5G232500/Seita.5G313600/Seita.5G325800/Seita.5G329500/Seita.5G351400/Seita.6G123500/Seita.7G088700/Seita.7G204200/Seita.7G218000/Seita.7G318000/Seita.7G331800/Seita.8G1…	35		Root	AllShare	sita00960	Tropane, piperidine and pyridine alkaloid biosynthesis	7/320	29/5494	0.00109087	0.0174739	0.014601	Seita.2G361800/Seita.5G440100/Seita.8G149600/Seita.8G150700/Seita.8G216400/Seita.8G216500/Seita.8G252100	7
Root	AllShare	GO:0006720	isoprenoid metabolic process	24/551	191/9983	0.000131012	0.0279455	0.026638	Seita.2G144900/Seita.2G145800/Seita.2G145900/Seita.2G187800/Seita.2G187900/Seita.2G300900/Seita.2G303000/Seita.3G245500/Seita.4G015700/Seita.4G021600/Seita.4G235500/Seita.5G071800/Seita.5G157700/Seita.5G315800/Seita.5G323400/Seita.5G404900/Seita.6G023100/Seita.6G100500/Seita.7G189300/Seita.8G069000/Seita.8G168400/Seita.9G021400/Seita.9G061300/Seita.9G344800	24		Root	AllShare	sita00480	Glutathione metabolism	18/320	141/5494	0.001261	0.0174739	0.014601	Seita.1G166500/Seita.1G192100/Seita.2G033500/Seita.2G406500/Seita.2G444500/Seita.3G038600/Seita.5G047800/Seita.5G104100/Seita.5G452900/Seita.7G225300/Seita.8G040400/Seita.9G064400/Seita.9G157600/Seita.9G345600/Seita.9G345700/Seita.9G346900/Seita.9G347000/Seita.9G424300	18
Root	AllShare	GO:0019748	secondary metabolic process	33/551	305/9983	0.00015521	0.0279455	0.026638	Seita.2G033500/Seita.2G132800/Seita.2G145700/Seita.2G145800/Seita.2G145900/Seita.2G283800/Seita.2G300900/Seita.3G096900/Seita.3G097200/Seita.3G097400/Seita.3G140700/Seita.4G021600/Seita.4G216300/Seita.4G235500/Seita.5G047800/Seita.5G251200/Seita.5G386300/Seita.5G434700/Seita.6G023100/Seita.6G100500/Seita.6G132000/Seita.6G237000/Seita.7G139200/Seita.7G168500/Seita.7G298100/Seita.8G069000/Seita.8G1…	33		Root	AllShare	sita00071	Fatty acid degradation	9/320	53/5494	0.00313731	0.0380399	0.0317859	Seita.1G307000/Seita.3G170100/Seita.4G156800/Seita.5G386300/Seita.7G283900/Seita.8G049100/Seita.8G099100/Seita.9G510900/Seita.9G511000	9
Root	AllShare	GO:0006721	terpenoid metabolic process	21/551	159/9983	0.000169196	0.0279455	0.026638	Seita.2G144900/Seita.2G145800/Seita.2G145900/Seita.2G300900/Seita.2G303000/Seita.4G015700/Seita.4G021600/Seita.4G235500/Seita.5G071800/Seita.5G157700/Seita.5G315800/Seita.5G323400/Seita.5G404900/Seita.6G023100/Seita.6G100500/Seita.7G189300/Seita.8G069000/Seita.8G168400/Seita.9G021400/Seita.9G061300/Seita.9G344800	21		Root	AllShare	sita00500	Starch and sucrose metabolism	20/320	180/5494	0.00375588	0.0404801	0.0338249	Seita.1G112800/Seita.2G168000/Seita.2G237100/Seita.2G315900/Seita.2G396200/Seita.3G059500/Seita.3G133300/Seita.4G041500/Seita.4G139700/Seita.5G019600/Seita.5G134800/Seita.5G313600/Seita.5G334800/Seita.5G429100/Seita.6G022200/Seita.7G088700/Seita.7G181300/Seita.8G083400/Seita.9G410800/Seita.9G416600	20
Root	AllShare	GO:0006805	xenobiotic metabolic process	5/551	11/9983	0.000175959	0.0279455	0.026638	Seita.5G104100/Seita.8G153700/Seita.9G205600/Seita.9G205700/Seita.9G205800	5		Root	AllShare	sita00906	Carotenoid biosynthesis	7/320	37/5494	0.00481748	0.0467295	0.0390469	Seita.2G229900/Seita.2G303000/Seita.3G391000/Seita.3G397800/Seita.5G315800/Seita.7G189300/Seita.8G168400	7
Root	AllShare	GO:0006873	cellular ion homeostasis	17/551	121/9983	0.000332552	0.048414	0.0461488	Seita.1G274100/Seita.3G030500/Seita.3G049900/Seita.3G051000/Seita.4G138500/Seita.4G159500/Seita.5G103100/Seita.6G123500/Seita.7G218000/Seita.7G331800/Seita.8G118200/Seita.9G205600/Seita.9G205700/Seita.9G205800/Seita.9G475100/Seita.9G475300/Seita.9G533500	17		Root	Se_Specific	sita00480	Glutathione metabolism	6/34	141/5494	0.000190984	0.00477461	0.00442279	Seita.2G033200/Seita.3G038700/Seita.5G453400/Seita.5G453500/Seita.9G346200/Seita.9G346400	6
Stem	To_Specific	GO:0009408	response to heat	5/13	199/9983	3.38304e-06	0.000632629	0.000512798	Seita.1G342400/Seita.2G053800/Seita.2G241600/Seita.4G111400/Seita.7G060200	5		Stem	To_Specific	sita03040	Spliceosome	4/13	199/5494	0.000923187	0.0101551	0.00777421	Seita.2G395600/Seita.2G402800/Seita.5G020500/Seita.9G127100	4
Stem	AllShare	GO:0009414	response to water deprivation	9/54	340/9983	7.61236e-05	0.0208344	0.019541	Seita.2G142500/Seita.5G119800/Seita.5G393800/Seita.7G184600/Seita.8G115400/Seita.9G039200/Seita.9G198800/Seita.9G229700/Seita.9G410800	9		Stem	To_Specific	sita00250	Alanine, aspartate and glutamate metabolism	2/13	55/5494	0.00715193	0.0393356	0.0301134	Seita.3G244300/Seita.7G115400	2
Stem	Se_Specific	GO:0003333	amino acid transmembrane transport	7/114	64/9983	7.64039e-06	0.00288807	0.00265805	Seita.1G333100/Seita.3G223500/Seita.4G006600/Seita.5G365100/Seita.5G387200/Seita.7G037100/Seita.9G299000	7		Stem	To_Specific	sita04141	Protein processing in endoplasmic reticulum	3/13	217/5494	0.0129591	0.0475165	0.0363763	Seita.1G342400/Seita.2G241600/Seita.4G111400	3
Stem	Se_Specific	GO:0006865	amino acid transport	7/114	64/9983	7.64039e-06	0.00288807	0.00265805	Seita.1G333100/Seita.3G223500/Seita.4G006600/Seita.5G365100/Seita.5G387200/Seita.7G037100/Seita.9G299000	7		Stem	AllShare	sita04016	MAPK signaling pathway - plant	6/28	167/5494	0.00015576	0.00377492	0.00366794	Seita.3G139000/Seita.3G164700/Seita.6G005300/Seita.7G021400/Seita.7G121700/Seita.9G460200	6
Stem	Se_Specific	GO:1903825	organic acid transmembrane transport	8/114	133/9983	0.000135332	0.0246755	0.0227103	Seita.1G333100/Seita.3G223500/Seita.4G006600/Seita.4G231500/Seita.5G365100/Seita.5G387200/Seita.7G037100/Seita.9G299000	8		Stem	AllShare	sita04075	Plant hormone signal transduction	7/28	267/5494	0.000290379	0.00377492	0.00366794	Seita.3G139000/Seita.3G164700/Seita.5G393800/Seita.6G005300/Seita.7G021400/Seita.7G121700/Seita.9G460200	7
Stem	Se_Specific	GO:1905039	carboxylic acid transmembrane transport	8/114	133/9983	0.000135332	0.0246755	0.0227103	Seita.1G333100/Seita.3G223500/Seita.4G006600/Seita.4G231500/Seita.5G365100/Seita.5G387200/Seita.7G037100/Seita.9G299000	8		Stem	Se_Specific	sita03010	Ribosome	13/63	334/5494	8.0222e-05	0.00285869	0.0026672	Seita.1G028300/Seita.1G214900/Seita.2G267400/Seita.3G036600/Seita.3G162800/Seita.3G330100/Seita.4G160400/Seita.5G096600/Seita.5G262600/Seita.6G112100/Seita.8G046000/Seita.9G044700/Seita.9G544700	13
Stem	Se_Specific	GO:0009809	lignin biosynthetic process	5/114	47/9983	0.000186072	0.0246755	0.0227103	Seita.1G230100/Seita.6G055900/Seita.7G155700/Seita.7G220500/Seita.8G126500	5		Stem	Se_Specific	sita00941	Flavonoid biosynthesis	5/63	44/5494	0.00012994	0.00285869	0.0026672	Seita.1G230100/Seita.5G361200/Seita.7G155700/Seita.7G249600/Seita.7G301600	5
Stem	Se_Specific	GO:0098656	anion transmembrane transport	11/114	265/9983	0.000214712	0.0246755	0.0227103	Seita.1G333100/Seita.3G223500/Seita.4G006600/Seita.4G231500/Seita.5G365100/Seita.5G387200/Seita.6G058300/Seita.7G037100/Seita.9G136100/Seita.9G299000/Seita.9G506300	11		Leaf	AllShare	sita00196	Photosynthesis - antenna proteins	9/156	16/5494	9.20655e-11	6.53665e-09	5.91157e-09	Seita.2G351600/Seita.2G352900/Seita.2G366600/Seita.4G139900/Seita.5G215600/Seita.6G158500/Seita.7G121800/Seita.8G080900/Seita.9G177100	9
Stem	Se_Specific	GO:0015849	organic acid transport	8/114	148/9983	0.000282381	0.0246755	0.0227103	Seita.1G333100/Seita.3G223500/Seita.4G006600/Seita.4G231500/Seita.5G365100/Seita.5G387200/Seita.7G037100/Seita.9G299000	8		Leaf	AllShare	sita00195	Photosynthesis	15/156	90/5494	2.33552e-08	8.29108e-07	7.49824e-07	Seita.2G031300/Seita.2G117000/Seita.2G330500/Seita.2G356500/Seita.3G184900/Seita.4G207000/Seita.5G172700/Seita.5G336700/Seita.6G005700/Seita.6G032200/Seita.6G082000/Seita.7G092700/Seita.7G279400/Seita.9G069300/Seita.J002400	15
Stem	Se_Specific	GO:0046942	carboxylic acid transport	8/114	148/9983	0.000282381	0.0246755	0.0227103	Seita.1G333100/Seita.3G223500/Seita.4G006600/Seita.4G231500/Seita.5G365100/Seita.5G387200/Seita.7G037100/Seita.9G299000	8		Leaf	AllShare	sita00500	Starch and sucrose metabolism	16/156	180/5494	4.33271e-05	0.00102541	0.000927352	Seita.2G168000/Seita.2G188200/Seita.2G343000/Seita.2G422000/Seita.4G191200/Seita.5G056800/Seita.5G384100/Seita.7G164300/Seita.9G091400/Seita.9G091600/Seita.9G091800/Seita.9G229700/Seita.9G350600/Seita.9G389200/Seita.9G410800/Seita.9G544600	16
Stem	Se_Specific	GO:0009813	flavonoid biosynthetic process	6/114	80/9983	0.000293756	0.0246755	0.0227103	Seita.1G230100/Seita.6G055900/Seita.7G155700/Seita.7G301600/Seita.8G013300/Seita.8G126500	6		Leaf	AllShare	sita04016	MAPK signaling pathway - plant	15/156	167/5494	6.74086e-05	0.0011965	0.00108209	Seita.1G013900/Seita.2G177500/Seita.2G216800/Seita.2G437500/Seita.3G139000/Seita.3G164700/Seita.3G218800/Seita.5G284300/Seita.5G395400/Seita.6G005300/Seita.6G170500/Seita.7G021400/Seita.7G121700/Seita.9G318200/Seita.9G460200	15
Stem	Se_Specific	GO:0046688	response to copper ion	3/114	13/9983	0.000381606	0.0288494	0.0265517	Seita.7G194000/Seita.7G330200/Seita.8G018100	3		Leaf	AllShare	sita04075	Plant hormone signal transduction	19/156	267/5494	0.000173668	0.00246609	0.00223027	Seita.1G013900/Seita.2G177500/Seita.2G367800/Seita.2G437500/Seita.3G139000/Seita.3G164700/Seita.3G218800/Seita.4G082000/Seita.4G226200/Seita.5G312700/Seita.5G393800/Seita.5G395400/Seita.5G455300/Seita.6G005300/Seita.7G021400/Seita.7G121700/Seita.9G067200/Seita.9G318200/Seita.9G460200	19
Stem	Se_Specific	GO:0009808	lignin metabolic process	5/114	58/9983	0.000503087	0.0345758	0.0318221	Seita.1G230100/Seita.6G055900/Seita.7G155700/Seita.7G220500/Seita.8G126500	5		Leaf	Se_Specific	sita00500	Starch and sucrose metabolism	10/87	180/5494	0.000497742	0.0343442	0.0330081	Seita.1G323700/Seita.2G235900/Seita.3G176900/Seita.3G270200/Seita.4G065500/Seita.5G334800/Seita.5G414600/Seita.5G429100/Seita.7G181300/Seita.9G102900	10
Leaf	AllShare	GO:0019684	photosynthesis, light reaction	12/307	91/9983	2.0668e-05	0.0113351	0.0111132	Seita.2G202200/Seita.2G330500/Seita.2G351600/Seita.2G352900/Seita.4G099200/Seita.4G139900/Seita.5G336700/Seita.6G005700/Seita.6G082000/Seita.8G080900/Seita.9G177100/Seita.J002400	12
Leaf	AllShare	GO:0009765	photosynthesis, light harvesting	6/307	20/9983	2.16849e-05	0.0113351	0.0111132	Seita.2G351600/Seita.2G352900/Seita.4G099200/Seita.4G139900/Seita.8G080900/Seita.9G177100	6
Leaf	AllShare	GO:0009414	response to water deprivation	25/307	340/9983	4.72862e-05	0.0167157	0.0163884	Seita.1G267200/Seita.1G324300/Seita.2G142500/Seita.2G284000/Seita.2G312300/Seita.3G144000/Seita.3G193800/Seita.4G082000/Seita.5G046600/Seita.5G174100/Seita.5G384100/Seita.5G393800/Seita.6G151500/Seita.6G152400/Seita.7G168700/Seita.7G184600/Seita.7G228200/Seita.8G115200/Seita.8G115400/Seita.8G125500/Seita.9G039200/Seita.9G198800/Seita.9G229700/Seita.9G410800/Seita.9G544600	25
Leaf	AllShare	GO:0009636	response to toxic substance	20/307	252/9983	9.74814e-05	0.0275677	0.027028	Seita.1G012200/Seita.1G239600/Seita.2G312300/Seita.2G352900/Seita.3G175700/Seita.5G046600/Seita.5G171000/Seita.5G174100/Seita.5G263000/Seita.5G346500/Seita.6G053800/Seita.7G102200/Seita.7G122100/Seita.7G141400/Seita.7G225300/Seita.7G279700/Seita.7G301200/Seita.8G013500/Seita.9G370000/Seita.9G488400	20
Leaf	AllShare	GO:0009644	response to high light intensity	10/307	80/9983	0.000159731	0.0376432	0.0369062	Seita.1G012200/Seita.2G053800/Seita.2G352900/Seita.3G175700/Seita.4G099200/Seita.4G139900/Seita.5G014300/Seita.6G082000/Seita.9G488400/Seita.9G531900	10
Leaf	AllShare	GO:1990748	cellular detoxification	11/307	98/9983	0.000201019	0.0406058	0.0398108	Seita.2G312300/Seita.5G046600/Seita.5G174100/Seita.5G263000/Seita.5G346500/Seita.6G053800/Seita.7G102200/Seita.7G122100/Seita.7G225300/Seita.7G279700/Seita.9G370000	11
