# Supplementary material for: Response of Multiple Tissues to Drought Revealed by a Weighted Gene Co-Expression Network Analysis in Foxtail Millet [Setaria italica (L.) P. Beauv.]
Source: Front Plant Sci. 2022 Jan 12;12:746166. doi: 10.3389/fpls.2021.746166 (PMC8790073; doi:10.3389/fpls.2021.746166)
Supplement: Supplementary Table S7 — Oppositely regulated DEGs identified between drought-tolerant and sensitive genotypes. [file Table_7.XLSX]

## Sheet: Supplementary Table S7
Supplementary Table S7: Oppositely regulated DEGs identified between drought tolerant and sensitive genotypes
GeneID	Organism	Regulations(Tolerance/Sensitive)	di-DBG	Best-hit-arabi-name	arabi-symbol	arabi-defline	Best-hit-rice-name	rice-symbol	rice-defline
Seita.1G001900	Leaf	Down/Up	di-DBG	AT2G17850.1	-	Rhodanese/Cell cycle control phosphatase superfamily protein	LOC_Os12g24020.2	-	rhodanese-like domain containing protein, putative, expressed
Seita.2G391600	Leaf	Down/Up	--	-	-	-	LOC_Os07g42650.1	-	expressed protein
Seita.3G082100	Leaf	Down/Up	--	AT2G25810.1	TIP4;1	tonoplast intrinsic protein 4;1	LOC_Os05g14240.1	-	aquaporin protein, putative, expressed
Seita.6G151500	Leaf	Down/Up	di-DBG	AT4G04330.1	RBCX1	Chaperonin-like RbcX protein	LOC_Os08g32930.1	-	expressed protein
Seita.9G079200	Leaf	Down/Up	--	AT2G15890.1	MEE14	maternal effect embryo arrest 14	LOC_Os03g55670.1	-	expressed protein
Seita.9G234200	Leaf	Down/Up	di-DBG	AT5G22920.1	-	CHY-type/CTCHY-type/RING-type Zinc finger protein	LOC_Os10g31850.1	-	RING finger and CHY zinc finger domain-containing protein 1, putative, expressed
Seita.1G057100	Leaf	Up/Down	di-DBG	AT4G15480.1	UGT84A1	UDP-Glycosyltransferase superfamily protein	LOC_Os02g09510.1	-	limonoid UDP-glucosyltransferase, putative, expressed
Seita.1G093200	Leaf	Up/Down	di-DBG	AT1G16720.1	HCF173	high chlorophyll fluorescence phenotype 173	LOC_Os02g04510.1	-	UOS1, putative, expressed
Seita.1G257800	Leaf	Up/Down	di-DBG	AT5G47240.1	atnudt8,NUDT8	nudix hydrolase homolog 8	LOC_Os04g46280.1	-	hydrolase, NUDIX family, domain containing protein, expressed
Seita.1G365200	Leaf	Up/Down	di-DBG	AT3G24190.1	-	Protein kinase superfamily protein	LOC_Os02g57160.1	-	ELMO/CED-12 family protein, putative, expressed
Seita.3G131900	Leaf	Up/Down	--	AT1G17050.1	SPS2	solanesyl diphosphate synthase 2	LOC_Os05g50550.1	-	polyprenyl synthetase, putative, expressed
Seita.3G216900	Leaf	Up/Down	di-DBG	AT3G12580.1	ATHSP70,HSP70	heat shock protein 70	LOC_Os05g38530.1	-	DnaK family protein, putative, expressed
Seita.3G308800	Leaf	Up/Down	di-DBG	AT3G46610.1	LPE1	Pentatricopeptide repeat (PPR-like) superfamily protein	LOC_Os12g18640.1	-	pentatricopeptide, putative, expressed
Seita.5G031200	Leaf	Up/Down	di-DBG	AT3G17510.1	CIPK1,SnRK3.16	CBL-interacting protein kinase 1	LOC_Os01g18800.1	-	CAMK_KIN1/SNF1/Nim1_like.9 - CAMK includes calcium/calmodulin depedent protein kinases, expressed
Seita.5G363500	Leaf	Up/Down	--	AT3G56290.1	-	-	LOC_Os01g60830.1	-	expressed protein
Seita.7G212200	Leaf	Up/Down	di-DBG	AT5G13770.1	-	Pentatricopeptide repeat (PPR-like) superfamily protein	LOC_Os04g49350.1	-	PPR repeat domain containing protein, putative, expressed
Seita.1G228800	root	Up/Down	--	AT5G57660.1	ATCOL5,COL5	CONSTANS-like 5	LOC_Os02g39710.1	-	CCT/B-box zinc finger protein, putative, expressed
Seita.2G401300	root	Up/Down	--	AT3G19950.1	-	RING/U-box superfamily protein	LOC_Os07g43740.1	-	zinc finger, C3HC4 type domain containing protein, expressed
Seita.8G128400	root	Up/Down	--	AT1G12060.1	ATBAG5,BAG5	BCL-2-associated athanogene 5	LOC_Os11g31060.1	-	IQ calmodulin-binding and BAG domain containing protein, putative, expressed
Seita.9G095900	root	Up/Down	--	AT3G22830.1	AT-HSFA6B,HSFA6B	heat shock transcription factor A6B	LOC_Os03g53340.1	-	HSF-type DNA-binding domain containing protein, expressed
Seita.1G326600	Stem	Up/Down	di-DBG	AT5G51440.1	HSP23.5	HSP20-like chaperones superfamily protein	LOC_Os02g52150.2	-	heat shock 22 kDa protein, mitochondrial precursor, putative, expressed
