# Supplementary material for: Response of Multiple Tissues to Drought Revealed by a Weighted Gene Co-Expression Network Analysis in Foxtail Millet [Setaria italica (L.) P. Beauv.]
Source: Front Plant Sci. 2022 Jan 12;12:746166. doi: 10.3389/fpls.2021.746166 (PMC8790073; doi:10.3389/fpls.2021.746166)
Supplement: Supplementary Table S8 — DETFs detected in both drought-tolerant and sensitive genotypes. [file Table_8.XLSX]

## Sheet: Supplementary Table S8
Supplementary Table S8: DETFs detected in both drought tolerant and sensitive genotypes
GeneID	TF_Family	Ci134_log2FC	Ci603_log2FC	Ci328_log2FC	Ci409_log2FC	Ci134_FDR	Ci603_FDR	Ci328_FDR	Ci409_FDR	Ci134_Regulate	Ci603_Regulate	Ci328_Regulate	Ci409_Regulate	trend(Tolerant/Sensitive)
Leaf																															GeneFamily	GeneNumer
Seita.2G353300	B3	0.920928	0.673134	1.39153	1.0934	0.041612	0.0127611	1.76317e-11	2.55143e-05	normal	normal	up	up	up/normal																	bHLH	13
Seita.9G493500	B3	0.611253	NA	2.19478	1.87981	0.566033	NA	0.000118272	0.00208301	normal	normal	up	up	up/normal																	ERF	12		Tissue	DETF_Number
Seita.1G350600	bHLH	-0.270563	-0.93587	-1.25474	-1.01344	0.865939	0.00367804	3.38989e-07	0.00085927	normal	normal	down	down	down/normal																	MYB	11		Root	184	(including 2 TFs with reverse pattern)
Seita.2G205900	bHLH	-0.125398	-0.710599	-1.32041	-1.04461	0.927505	0.0887449	4.7427e-06	9.99975e-05	normal	normal	down	down	down/normal																	HD-ZIP	9		Stem	58
Seita.9G054800	bHLH	-0.695087	-0.897399	-1.39519	-1.22574	0.195714	0.0196689	1.0016e-09	5.55495e-06	normal	normal	down	down	down/normal																	bZIP	8		Leaf	133
Seita.5G073000	bHLH	1.35857	1.60761	0.51644	-1.39856	0.0045017	0.00516145	0.422258	0.438934	up	up	normal	normal	normal/up																	MYB_related	8		total	329
Seita.7G250800	bHLH	2.44012	1.24678	0.877835	0.525432	0.0315799	0.0118845	0.0291838	0.346639	up	up	normal	normal	normal/up																	NAC	8
Seita.9G421000	bZIP	-1.42736	-1.35072	-0.0783581	-0.0773833	0.0273019	0.0149033	0.901612	0.882068	down	down	normal	normal	normal/down																	CO-like	6
Seita.8G036300	bZIP	2.03959	3.78406	-0.478691	-2.261	0.0278766	4.88451e-10	0.16583	0.238147	up	up	normal	normal	normal/up																	DBB	6
Seita.9G449600	C2H2	0.292636	-0.973948	-1.66495	-1.04637	0.908522	0.124517	9.15162e-05	0.0316105	normal	normal	down	down	down/normal																	G2-like	6
Seita.7G153500	CO-like	-1.76979	-2.2556	-0.579254	-0.975124	9.92627e-05	3.96191e-16	0.0105467	8.94359e-05	down	down	normal	normal	normal/down																	WRKY	6
Seita.1G301300	CO-like	3.28678	3.27479	-0.120176	-0.467305	2.87182e-09	1.2838e-28	0.821654	0.444382	up	up	normal	normal	normal/up																	LBD	5
Seita.1G253100	DBB	-1.04144	-0.496484	-1.93316	-1.49104	0.289631	0.45979	7.61851e-07	0.00231401	normal	normal	down	down	down/normal																	C2H2	4
Seita.7G183800	DBB	-0.951052	-0.409188	-3.13221	-2.14627	0.298739	0.542647	7.01581e-14	8.54999e-06	normal	normal	down	down	down/normal																	Dof	4
Seita.7G149800	DBB	-1.15238	-1.54697	-0.308015	-0.437092	0.0422033	0.000289262	0.287982	0.202681	down	down	normal	normal	normal/down																	GRAS	4
Seita.2G175000	DBB	2.21776	2.9422	-0.147378	0.116811	1.66359e-06	2.6628e-27	0.715802	0.853631	up	up	normal	normal	normal/up																	TALE	4
Seita.4G124800	Dof	-0.568261	0.0129803	-2.03492	-1.93288	0.589143	0.996315	1.36847e-09	1.07214e-06	normal	normal	down	down	down/normal																	ZF-HD	4
Seita.3G014900	Dof	0.938293	1.43309	1.78907	1.23822	0.171732	0.0975464	5.06834e-06	0.0189978	normal	normal	up	up	up/normal																	B3	3
Seita.8G173100	ERF	0.185789	-0.818131	-1.39698	-1.43622	0.932477	0.182823	7.60879e-05	0.0143019	normal	normal	down	down	down/normal																	MIKC_MADS	3
Seita.1G027100	ERF	-3.52087	-1.94364	NA	NA	1.59535e-05	0.0142328	NA	NA	down	down	normal	normal	normal/down																	C3H	1
Seita.3G207800	ERF	4.08403	3.04903	NA	NA	8.0826e-05	3.41581e-06	NA	NA	up	up	normal	normal	normal/up																	GATA	1
Seita.7G290600	ERF	1.89295	1.53977	NA	NA	0.011985	0.0140704	NA	NA	up	up	normal	normal	normal/up																	GRF	1
Seita.1G257600	ERF	0.878325	0.478642	2.66657	1.745	0.560669	0.723952	5.03658e-05	0.00261787	normal	normal	up	up	up/normal																	HB-other	1
Seita.2G172500	ERF	0.102286	0.77928	1.51473	1.80298	0.956505	0.0595062	0.00161781	1.13641e-05	normal	normal	up	up	up/normal																	NF-YA	1
Seita.3G029000	G2-like	0.100913	-0.497699	-1.92731	-1.34231	0.97707	0.321911	1.23513e-10	4.50637e-05	normal	normal	down	down	down/normal																	NF-YB	1
Seita.7G267900	GATA	0.21765	-0.87211	-1.63461	-1.29728	0.890332	0.0569286	0.0362126	0.0109166	normal	normal	down	down	down/normal																	Nin-like	1
Seita.4G003600	GRAS	-1.7248	-1.82656	-0.371613	-0.731327	0.000496869	1.84122e-05	0.428185	0.0220584	down	down	normal	normal	normal/down																	SBP	1
Seita.7G224500	GRF	1.31503	1.43135	-0.125166	0.815033	0.015753	0.000152138	0.815271	0.0435153	up	up	normal	normal	normal/up
Seita.4G029200	HD-ZIP	0.364914	-0.136396	-2.22784	-1.29193	0.802317	0.887277	2.38393e-06	0.0200006	normal	normal	down	down	down/normal
Seita.2G236800	HD-ZIP	-1.83373	-1.32236	-0.920842	-0.869585	1.78308e-05	1.29073e-06	1.19887e-05	0.000720595	down	down	normal	normal	normal/down
Seita.2G373900	LBD	-1.33124	-0.62173	-1.13918	-1.4592	0.21125	0.375382	0.00522144	0.00014494	normal	normal	down	down	down/normal
Seita.3G240500	LBD	-2.08319	-0.968754	-1.87268	-1.10275	0.273984	0.140319	0.000838714	0.0491772	normal	normal	down	down	down/normal
Seita.9G170000	LBD	-1.37169	-1.32431	0.1596	-0.999204	0.0200959	0.00811712	0.782207	0.00320877	down	down	normal	normal	normal/down
Seita.2G038300	LBD	1.53373	NA	1.50729	2.32732	0.489429	NA	0.00181879	0.000244006	normal	normal	up	up	up/normal
Seita.9G088900	MIKC_MADS	-1.47537	-1.65763	-0.921854	-0.223119	0.000817985	2.03332e-08	4.18523e-05	0.504988	down	down	normal	normal	normal/down
Seita.3G161500	MYB	1.07662	1.92478	-0.745665	-0.289183	0.0184856	1.50752e-06	0.0414873	0.741914	up	up	normal	normal	normal/up
Seita.5G391300	MYB	4.68978	5.91672	NA	NA	2.73499e-10	5.64357e-12	NA	NA	up	up	normal	normal	normal/up
Seita.7G161400	MYB	2.91842	2.70466	0.17337	NA	0.000251961	2.12298e-05	0.840881	NA	up	up	normal	normal	normal/up
Seita.4G205800	MYB	1.52255	0.565343	2.51029	1.0235	0.0730122	0.418241	4.38352e-18	0.0028451	normal	normal	up	up	up/normal
Seita.9G432200	MYB	1.22543	-0.996543	3.93713	1.67668	0.0593707	0.0974072	1.52063e-07	0.00647071	normal	normal	up	up	up/normal
Seita.5G391200	NAC	-0.987357	-1.18919	-2.87855	-3.14139	0.39693	0.0779175	1.18646e-09	7.0556e-08	normal	normal	down	down	down/normal
Seita.1G209000	NAC	1.78791	4.08536	-0.0108708	0.0172886	0.00163489	2.74689e-17	1	0.973896	up	up	normal	normal	normal/up
Seita.5G265500	NAC	1.80616	1.54902	0.366568	0.897451	0.00227665	0.000879454	0.623097	0.0483153	up	up	normal	normal	normal/up
Seita.6G045900	NF-YB	-0.348627	-0.906495	-1.73944	-1.30861	0.673737	0.0399012	1.9878e-10	0.00024409	normal	normal	down	down	down/normal
Seita.4G006100	TALE	-1.68806	-1.50548	-0.185374	-0.516963	5.71083e-05	4.37242e-09	0.500272	0.0673826	down	down	normal	normal	normal/down
Seita.9G560500	TALE	1.19858	1.6791	-0.677593	0.149525	0.0472356	7.25604e-06	0.324802	0.851558	up	up	normal	normal	normal/up
Seita.5G378000	WRKY	-1.60041	-1.3547	-0.867514	-0.952407	0.000968815	0.00011906	0.00695261	0.0040526	down	down	normal	normal	normal/down
Seita.5G256700	WRKY	0.254854	0.754566	1.08191	2.02341	0.880956	0.253027	0.00338687	3.49665e-05	normal	normal	up	up	up/normal
Seita.2G236300	ZF-HD	-0.428458	-0.922995	-2.50749	-3.70152	0.771481	0.272142	5.73438e-07	1.03381e-05	normal	normal	down	down	down/normal
Seita.8G080800	ZF-HD	-0.753572	-1.42558	-2.03476	-2.10316	0.392203	0.51666	0.0405228	5.08505e-05	normal	normal	down	down	down/normal
Stem																															GeneFamily	GeneNumer
Seita.4G204700	AP2	-2.35036	-1.5213	-0.530471	-0.387978	0.00553235	0.0105729	0.748888	0.910293	down	down	normal	normal	normal/down																	MYB	0
Seita.7G169600	ARF	-1.91185	-1.62343	-0.1791	-0.758516	0.0132185	4.26245e-07	0.941188	0.561155	down	down	normal	normal	normal/down																	ERF	0
Seita.5G301900	B3	-6.18816	-4.97578	NA	-1.93402	2.31526e-07	1.04168e-15	NA	0.115369	down	down	normal	normal	normal/down																	bHLH	0
Seita.6G166200	bHLH	-0.967696	-2.04898	-2.79575	-3.30336	0.584542	0.502556	0.0102511	0.0187462	normal	normal	down	down	down/normal																	bZIP	0
Seita.2G263000	bHLH	-1.83419	-1.1396	-1.23438	-0.988349	0.0129337	0.00191836	0.0857506	0.31972	down	down	normal	normal	normal/down																	HD-ZIP	0
Seita.4G187300	bZIP	-3.31745	-1.84415	-0.00320301	-0.492291	1.77937e-05	5.73826e-06	0.99968	0.821068	down	down	normal	normal	normal/down																	MYB_related	0
Seita.3G136800	C3H	-3.92824	-2.14691	-1.39844	-0.970422	1.00509e-07	0.011898	0.0610538	0.376863	down	down	normal	normal	normal/down																	NAC	0
Seita.2G175000	DBB	2.37221	1.77587	0.37596	-0.0356654	0.000865715	5.67163e-07	0.927678	0.987753	up	up	normal	normal	normal/up																	AP2	0
Seita.5G022000	ERF	-1.8588	-1.26031	-1.14102	-0.369243	0.00904911	0.0091386	0.182858	0.881679	down	down	normal	normal	normal/down																	ARF	0
Seita.7G188500	ERF	-2.09755	-1.00607	-0.705545	-1.03829	0.00267187	0.00577699	0.48307	0.287122	down	down	normal	normal	normal/down																	C3H	0
Seita.7G188700	ERF	1.84403	1.64792	1.49158	-0.218838	0.0243125	0.00113621	0.309244	0.972212	up	up	normal	normal	normal/up																	G2-like	0
Seita.4G003600	GRAS	-2.49572	-1.75061	-1.14652	-1.37978	0.000637941	1.4451e-06	0.185447	0.113731	down	down	normal	normal	normal/down																	GRAS	0
Seita.2G224000	HB-other	-2.16511	-1.01245	-0.957143	-0.955939	0.00380047	0.00437507	0.597634	0.569678	down	down	normal	normal	normal/down																	HB-other	0
Seita.6G176400	HD-ZIP	-3.11793	-3.12295	-1.19742	-1.71326	0.0199795	1.41643e-05	0.472966	0.225686	down	down	normal	normal	normal/down																	HSF	0
Seita.2G193200	HD-ZIP	0.189364	0.865899	1.99105	2.12528	0.945637	0.0227085	0.00056206	0.019449	normal	normal	up	up	up/normal																	B3	0
Seita.6G236100	HSF	0.477034	-0.811493	1.71819	1.93589	0.708806	0.036971	0.0261616	0.0173287	normal	normal	up	up	up/normal																	C2H2	0
Seita.1G117000	MYB	-3.06084	-14	NA	-2.68287	0.0118874	2.62564e-13	NA	0.060082	down	down	normal	normal	normal/down																	DBB	0
Seita.5G274200	MYB	-2.70437	-1.24518	-1.61112	-0.859993	0.00017189	0.000866885	0.155563	0.506976	down	down	normal	normal	normal/down																	Dof	0
Seita.6G063000	MYB	-2.93724	-1.76475	0.00856273	-1.46232	0.00148481	0.00206972	0.986801	0.506086	down	down	normal	normal	normal/down																	LBD	0
Seita.7G220500	MYB	-2.58799	-1.93305	-0.418503	-1.13161	0.00311884	0.000689583	0.859744	0.40962	down	down	normal	normal	normal/down																	LSD	0
Seita.8G057800	MYB	-2.54564	-1.42354	-0.753188	-0.706557	0.000602093	1.67521e-05	0.789272	0.780465	down	down	normal	normal	normal/down																	M-type_MADS	0
Seita.5G216800	MYB_related	-2.22207	-2.80323	-1.3349	-0.317828	0.00191337	6.42947e-17	0.0657736	0.879037	down	down	normal	normal	normal/down																	NF-YB	0
Seita.7G212900	MYB_related	2.98462	4.05935	1.19956	0.29539	0.00102735	6.92671e-19	0.745853	0.943803	up	up	normal	normal	normal/up																	Nin-like	0
Seita.3G147200	NAC	-3.28865	-1.66824	-0.902871	-1.96608	0.0413857	0.00137101	0.846418	0.276012	down	down	normal	normal	normal/down																	Trihelix	0
Seita.6G225800	NAC	-2.62669	-1.35105	-2.22118	-0.617929	0.0140521	6.01193e-05	0.0619023	0.719449	down	down	normal	normal	normal/down																	WRKY	0
Seita.5G153300	Trihelix	-2.56731	-1.25262	-1.39807	-0.561482	0.000623421	0.00478087	0.270509	0.800631	down	down	normal	normal	normal/down																	ZF-HD	0
Root																															GeneFamily	GeneNumer
Seita.5G073000	bHLH	-0.180605	-1.12452	-3.25411	-1.08199	0.97041	0.135401	2.04586e-47	3.21674e-06	normal	normal	down	down	down/normal																	ERF	24
Seita.9G511700	bHLH	-3.16066	-0.188579	-2.5895	-2.92442	0.109409	0.92007	0.000783072	1.89631e-07	normal	normal	down	down	down/normal																	bHLH	21
Seita.5G152000	bHLH	-1.27497	-1.32829	0.192558	-0.529601	0.0136556	1.4435e-06	0.468637	0.0373498	down	down	normal	normal	normal/down																	NAC	21
Seita.5G455700	bHLH	-2.04384	-1.47798	NA	NA	0.00674414	0.0128512	NA	NA	down	down	normal	normal	normal/down																	MYB	19
Seita.5G353800	bZIP	-1.15135	-1.29205	-0.799634	-0.613942	0.0196729	1.49208e-06	0.000275513	0.0147682	down	down	normal	normal	normal/down																	WRKY	19
Seita.1G061000	C2H2	-2.50505	-2.28211	-0.540588	-0.823146	9.10643e-05	1.55138e-08	0.228569	0.0467916	down	down	normal	normal	normal/down																	bZIP	10
Seita.1G372800	C2H2	-1.8432	-1.6842	-0.483286	-0.849271	0.00487832	0.000675508	0.445759	0.0932485	down	down	normal	normal	normal/down																	C2H2	10
Seita.8G047500	C2H2	-2.45348	-2.00083	NA	-0.405859	0.0011998	0.00427284	NA	0.549008	down	down	normal	normal	normal/down																	G2-like	8
Seita.4G217600	C2H2	2.14028	3.27111	NA	NA	0.00437189	1.30444e-07	NA	NA	up	up	normal	normal	normal/up																	GRAS	7
Seita.6G053600	C3H	0.863624	0.974244	1.33122	2.24567	0.119661	0.470091	0.000834475	4.43428e-05	normal	normal	up	up	up/normal																	MYB_related	7
Seita.1G301300	CO-like	1.37211	2.68583	0.836251	0.529822	0.0222581	1.30389e-14	0.0721707	0.29846	up	up	normal	normal	normal/up																	HD-ZIP	6
Seita.1G228800	CO-like	-1.56566	-1.05892	1.2761	1.01673	0.00152874	0.00568178	6.14424e-05	0.000695188	down	down	up	up	up/down																	HSF	6
Seita.1G253100	DBB	-0.635708	-1.3784	-4.10082	-2.24537	0.483758	0.151686	4.29646e-29	2.44155e-22	normal	normal	down	down	down/normal																	CO-like	3
Seita.1G225000	DBB	0.961539	1.25895	1.36233	1.83307	0.246608	0.229682	0.0082538	7.41647e-05	normal	normal	up	up	up/normal																	DBB	2
Seita.1G303300	Dof	-1.42045	0.510157	-2.55166	-2.59775	0.280409	0.302452	0.00593803	7.26783e-06	normal	normal	down	down	down/normal																	Dof	2
Seita.9G525000	Dof	-0.359622	0.903181	1.75661	1.1315	0.596905	0.00660906	5.27013e-13	7.64868e-06	normal	normal	up	up	up/normal																	GATA	2
Seita.1G259100	ERF	NA	NA	-5.77639	-1.29815	NA	NA	6.10604e-15	0.0121864	normal	normal	down	down	down/normal																	LBD	2
Seita.5G015800	ERF	-0.592206	-0.852145	-1.86367	-1.17985	0.742117	0.00356738	1.55895e-06	5.85887e-05	normal	normal	down	down	down/normal																	MIKC_MADS	2
Seita.5G022000	ERF	-0.4899	0.255403	-1.68688	-1.16914	0.584265	0.786397	1.12558e-15	0.000514306	normal	normal	down	down	down/normal																	Trihelix	2
Seita.5G406200	ERF	0.993496	0.721431	-2.81767	-1.08635	0.682841	0.406378	3.60475e-05	0.0365236	normal	normal	down	down	down/normal																	AP2	1
Seita.7G205200	ERF	-0.178372	-0.813455	-2.88896	-1.18657	0.971857	0.045013	5.80225e-40	5.5217e-07	normal	normal	down	down	down/normal																	ARF	1
Seita.4G185800	G2-like	1.49655	1.18441	0.761667	0.439183	0.020367	0.0254767	0.119947	0.421948	up	up	normal	normal	normal/up																	B3	1
Seita.5G468100	G2-like	1.92808	4.06949	0.367495	0.325881	1.84775e-05	7.75228e-46	0.203734	0.255184	up	up	normal	normal	normal/up																	C3H	1
Seita.2G158000	GATA	-1.22569	-1.21394	-0.997362	-0.696334	0.0369595	0.000334586	0.00290954	0.0403667	down	down	normal	normal	normal/down																	GeBP	1
Seita.2G387900	GRAS	-1.7046	-2.68323	-0.835834	-0.295778	0.000768044	4.16565e-16	0.0448097	0.448609	down	down	normal	normal	normal/down																	GRF	1
Seita.7G203300	HD-ZIP	-0.243254	-1.46544	-2.87936	-1.42588	0.887523	0.204373	3.51728e-05	5.69792e-05	normal	normal	down	down	down/normal																	LSD	1
Seita.4G029000	HD-ZIP	-5.25072	-1.66482	-1.86196	-0.152767	7.76096e-10	0.0223023	0.0809295	0.853296	down	down	normal	normal	normal/down																	M-type_MADS	1
Seita.9G524200	HD-ZIP	-3.78892	-2.09951	NA	-1.27122	2.19637e-06	0.00535402	NA	0.0984941	down	down	normal	normal	normal/down																	NF-YA	1
Seita.9G095900	HSF	-2.48726	-6.27672	1.26724	3.07172	0.00073465	1.10219e-25	0.0174779	0.0158136	down	down	up	up	up/down																	NF-YB	1
Seita.6G236100	HSF	1.14027	0.557286	1.20858	1.7416	0.129072	0.0973431	2.55569e-09	1.0818e-13	normal	normal	up	up	up/normal																	NF-YC	1
Seita.7G202900	HSF	-0.930805	-0.852508	1.44405	1.92095	0.0814351	0.0197048	8.97445e-07	1.13905e-14	normal	normal	up	up	up/normal
Seita.6G063000	MYB	-0.190798	2.1344	-1.0969	-1.07073	0.844627	0.0661574	0.0099371	0.00820011	normal	normal	down	down	down/normal
Seita.9G425100	MYB	-0.756226	-0.426998	-1.87123	-1.02038	0.317635	0.168303	2.24253e-19	6.0108e-06	normal	normal	down	down	down/normal
Seita.2G199900	MYB	-2.0347	-3.42182	NA	-1.07831	0.00895339	2.97901e-09	NA	0.0531929	down	down	normal	normal	normal/down
Seita.7G279500	MYB	-2.24722	-1.64255	0.234532	-0.577313	0.0341249	7.73967e-06	0.461152	0.103057	down	down	normal	normal	normal/down
Seita.3G161500	MYB	1.40037	2.83379	-0.204749	0.248701	0.00434906	1.47759e-05	0.548676	0.441228	up	up	normal	normal	normal/up
Seita.3G062400	MYB	1.14938	0.260643	1.95266	1.34273	0.159686	0.537647	3.8401e-22	5.02892e-08	normal	normal	up	up	up/normal
Seita.5G098300	MYB	0.229794	0.983172	1.28553	1.32128	0.792959	0.000411321	4.71168e-09	7.93265e-09	normal	normal	up	up	up/normal
Seita.7G220500	MYB	0.202656	0.94018	1.33186	1.06662	0.870601	0.000694289	7.8408e-10	4.86816e-06	normal	normal	up	up	up/normal
Seita.7G285100	MYB	0.911229	0.901802	1.03094	1.00355	0.116131	0.0080178	7.06483e-05	0.000152147	normal	normal	up	up	up/normal
Seita.3G124200	MYB_related	-0.32559	-0.59462	-1.23521	-1.23064	0.739842	0.186571	0.00359029	0.00131364	normal	normal	down	down	down/normal
Seita.5G110700	MYB_related	NA	NA	-4.56866	-3.86742	NA	NA	8.43858e-09	8.00452e-12	normal	normal	down	down	down/normal
Seita.1G217800	NAC	NA	NA	-2.11647	-1.79568	NA	NA	0.000102224	0.00148023	normal	normal	down	down	down/normal
Seita.3G225400	NAC	-1.17316	-0.753864	-2.22114	-2.18456	0.317084	0.0297082	5.58849e-12	1.12329e-12	normal	normal	down	down	down/normal
Seita.2G086600	NAC	-1.35692	-1.30312	-0.639709	-0.470957	0.0105374	1.55175e-06	0.00385343	0.0550548	down	down	normal	normal	normal/down
Seita.7G137700	NAC	-1.73772	-1.2386	NA	NA	0.0237685	0.0424171	NA	NA	down	down	normal	normal	normal/down
Seita.5G435400	NAC	0.739646	0.867349	1.61262	1.25346	0.315072	0.169306	8.16093e-15	2.94904e-08	normal	normal	up	up	up/normal
Seita.5G153300	Trihelix	-0.882981	-0.544554	-1.23916	-1.5112	0.253163	0.202673	1.2667e-09	4.27706e-05	normal	normal	down	down	down/normal
Seita.3G108500	WRKY	-0.975616	-0.660408	-1.37764	-1.31314	0.116821	0.0344027	1.12033e-11	7.0709e-09	normal	normal	down	down	down/normal
Seita.9G163600	WRKY	-0.647422	-0.914321	-1.34486	-1.00498	0.301453	0.000945184	5.92417e-10	1.58406e-05	normal	normal	down	down	down/normal
Seita.5G306000	WRKY	-1.16791	-1.8284	-0.856221	-0.775285	0.0218479	1.73396e-11	0.000336335	0.00320349	down	down	normal	normal	normal/down
