# Supplementary material for: Response of Multiple Tissues to Drought Revealed by a Weighted Gene Co-Expression Network Analysis in Foxtail Millet [Setaria italica (L.) P. Beauv.]
Source: Front Plant Sci. 2022 Jan 12;12:746166. doi: 10.3389/fpls.2021.746166 (PMC8790073; doi:10.3389/fpls.2021.746166)
Supplement: Supplementary Table S9 — K-means clustering in this trial. [file Table_9.XLSX]

## Sheet: Supplementary Table S9
Supplementary Table S9: K-means clustering in this trial
Cluster	GeneID	NO_Ci134_1	NO_Ci134_2	NO_Ci134_3	NO_Ci328_1	NO_Ci328_2	NO_Ci328_3	NO_Ci409_1	NO_Ci409_2	NO_Ci409_3	NO_Ci603_1	NO_Ci603_2	NO_Ci603_3	DR_Ci134_1	DR_Ci134_2	DR_Ci134_3	DR_Ci328_1	DR_Ci328_2	DR_Ci328_3	DR_Ci409_1	DR_Ci409_2	DR_Ci409_3	DR_Ci603_1	DR_Ci603_2	DR_Ci603_3
Leaf_Cluster_C (1155)	Seita.1G001900	-1.04561	0.0128126	-1.04297	0.676341	0.361321	0.593055	-0.0833311	-0.0252419	0.433117	-0.0224301	-0.386451	-0.744839	1.51023	1.10967	1.14165	-0.0491603	-0.80557	-0.580126	-1.1099	-1.93275	-1.79941	1.61285	1.09745	1.07928
Leaf_Cluster_C (1155)	Seita.1G002000	-0.338594	0.0268356	-0.866614	0.884253	1.15183	0.858401	-0.575477	0.0607061	-0.176882	-1.56944	-1.21938	-1.72996	1.20645	1.77693	0.73449	-0.908225	-1.46725	-0.304475	-0.000689557	-0.262192	-0.215329	1.4831	1.1663	0.28521
Leaf_Cluster_C (1155)	Seita.1G002800	-0.637673	-0.578532	-0.901629	0.119704	0.0767441	-0.925565	-0.867976	-1.34474	-0.855562	-0.861621	-1.53907	-1.31087	1.93439	1.94148	1.03713	0.975866	0.730661	0.943024	0.253839	0.807956	0.70708	-0.297031	0.261181	0.331224
Leaf_Cluster_C (1155)	Seita.1G005000	0.0123131	-0.292683	-0.203973	-0.925703	-0.569603	-0.512947	-0.98801	-1.04355	-1.74834	-1.50749	-1.2133	-1.03719	1.20643	1.34478	1.68435	0.418007	0.208125	0.72783	1.04711	0.452696	0.125862	1.39848	1.13295	0.28387
Leaf_Cluster_C (1155)	Seita.1G015800	-0.720407	-0.644901	-0.720407	-0.720407	-0.720407	-0.601357	-0.720407	-0.720407	-0.720407	-0.720407	-0.720407	-0.720407	1.0432	0.576846	1.5049	2.47279	0.0124239	0.295395	-0.540073	-0.527124	-0.648736	1.33249	1.25006	1.67815
Leaf_Cluster_C (1155)	Seita.1G029700	-1.0622	-0.65118	-1.08799	-0.490667	0.492814	1.29377	-1.08799	-0.990951	-1.08799	-0.292738	-1.08799	0.189248	1.18208	0.376095	1.5156	1.64878	1.22928	0.0698768	-1.07074	1.11805	-1.08799	-0.545926	0.223094	1.20564
Leaf_Cluster_C (1155)	Seita.1G030000	-1.01245	-0.832435	-1.01245	-0.457352	0.547346	2.43605	-1.01245	-0.958942	-1.01245	0.466267	-1.01245	0.0500156	1.11217	0.0092658	0.570458	1.7544	0.849307	0.172911	-1.01245	1.00548	-1.01245	-0.604371	0.0869258	0.879637
Leaf_Cluster_C (1155)	Seita.1G034900	-0.986152	-0.77865	-0.769106	-0.936717	-0.991482	-0.965219	-0.510093	-0.828165	-1.02804	-0.694438	-0.853382	-0.891161	1.44922	1.58757	2.12441	1.59391	0.926443	0.628648	0.640021	0.528582	0.523902	0.352494	-0.00252881	-0.120066
Leaf_Cluster_C (1155)	Seita.1G036400	0.137103	-0.257015	-0.912953	-0.940985	-0.878877	-0.871202	-0.340662	-0.277801	-0.520591	-0.55963	-1.43057	-1.008	1.85071	1.76247	2.36612	0.6911	-0.430867	-0.745692	0.37327	0.412512	-0.0044	1.29536	-0.326833	0.617445
Leaf_Cluster_C (1155)	Seita.1G036500	0.302116	0.146798	-0.913807	-0.818864	-0.981039	-0.727903	-0.0761919	-0.32118	-0.450055	-0.6127	-1.10573	-1.02043	2.11231	1.51894	2.59625	0.416211	-0.611194	-0.81908	0.102495	0.308934	-0.0505752	1.1683	-0.68366	0.52006
Leaf_Cluster_C (1155)	Seita.1G038400	0.000739026	0.0221469	-0.964401	-1.0934	-0.779414	-0.860135	-0.118835	-0.136023	-0.29332	-0.350695	-1.04772	0.107827	1.11021	0.934205	1.24166	-1.28525	-1.45844	-1.20994	0.154427	0.572815	0.44354	2.15967	1.35218	1.49816
Leaf_Cluster_C (1155)	Seita.1G039200	-0.741041	-0.828603	-1.1441	-1.07667	-0.923498	-0.926066	-0.933442	-0.0431661	0.102512	-1.38178	-0.100265	-0.633041	1.77048	1.56107	0.0357543	0.457248	-0.79546	-0.302999	1.95327	0.397468	0.567556	1.00522	1.54216	0.437397
Leaf_Cluster_C (1155)	Seita.1G045000	-0.336808	-0.532608	-0.757454	0.0455928	-0.0909651	-0.450858	-1.09733	-1.12798	-1.78007	-1.2043	-1.28424	-1.14334	1.88399	1.06383	1.70119	1.1113	0.610578	0.613839	0.483892	0.471348	-0.0181561	1.25582	0.280172	0.302548
Leaf_Cluster_C (1155)	Seita.1G057300	0.168587	0.286708	0.016268	-0.603297	-1.03328	-0.18051	-0.913821	-0.787506	-1.30742	-0.87803	-0.913792	-1.25124	1.77491	2.09276	1.61616	-0.520124	-0.506558	-0.652968	1.1056	0.804559	0.484799	1.35754	0.0488451	-0.208186
Leaf_Cluster_C (1155)	Seita.1G075600	-0.575116	-1.00777	-1.11685	-0.0705636	0.199726	-0.0192456	-0.720423	-0.667947	-2.04802	-1.21613	-1.03439	-0.785824	1.25382	1.1787	1.24683	1.26274	1.48248	1.424	-0.0214548	-0.14886	-0.347936	1.1285	0.525031	0.0786997
Leaf_Cluster_C (1155)	Seita.1G099600	-0.167053	-0.0596149	-0.191499	-0.129188	-0.102547	-0.170497	-1.04958	-0.884213	-1.3298	-1.0602	-2.06857	-0.809521	1.55304	1.80438	0.798225	1.0674	1.02842	1.31154	0.315148	-0.291415	1.38866	-0.308141	0.191261	-0.836228
Leaf_Cluster_C (1155)	Seita.1G102500	-1.1125	-0.88462	-1.7418	0.154718	0.0236132	-0.190013	-0.601372	-0.946961	-0.877925	-1.02241	-0.884956	-1.65612	1.61951	1.75282	0.56751	1.00446	1.28352	1.25968	0.240754	0.52983	0.399351	0.586831	0.0762627	0.419827
Leaf_Cluster_C (1155)	Seita.1G115800	-0.436555	-0.511055	-0.0853073	-0.49567	-0.236447	-0.591698	-0.601441	-0.608477	-0.676522	-0.63789	-0.676522	-0.676522	2.64482	1.51214	2.24252	-0.637077	-0.676522	-0.167789	-0.676522	-0.249008	-0.636335	1.48919	0.509174	0.879512
Leaf_Cluster_C (1155)	Seita.1G116100	0.260756	-0.606269	0.342211	-0.379275	-0.219524	-0.317684	-0.497587	-0.556419	-0.606269	-0.580607	-0.606269	-0.606269	3.24033	1.66287	2.27936	-0.606269	-0.606269	-0.487965	-0.324614	-0.44499	-0.435373	0.163512	-0.351364	0.283969
Leaf_Cluster_C (1155)	Seita.1G118100	0.0790615	0.375599	0.282888	-0.635315	-0.544744	-0.635315	-0.422982	-0.38266	-0.550352	-0.562414	-0.236012	-0.481881	2.09838	2.57144	2.76814	-0.635315	-0.319858	-0.469966	-0.562988	-0.365806	-0.458442	-0.415711	-0.441079	-0.0546699
Leaf_Cluster_C (1155)	Seita.1G127500	-0.64703	-0.219266	-0.594021	-0.674418	-0.556222	-0.283439	-0.583094	-0.674418	-0.674418	-0.579517	-0.583463	-0.674418	2.88478	2.25364	2.1037	0.450822	-0.225118	0.0149587	-0.385472	-0.441184	0.645428	-0.208389	-0.103103	-0.246332
Leaf_Cluster_C (1155)	Seita.1G135500	-0.273621	-0.467912	-0.535894	-0.68398	-0.616166	-0.462141	-0.796794	-0.562822	-0.845558	-0.88146	-0.632516	-0.890564	2.62528	2.20073	1.91151	0.439127	0.550541	0.95289	-0.325288	-0.499822	-0.343167	0.505307	0.0728354	-0.440509
Leaf_Cluster_C (1155)	Seita.1G135700	-0.401507	-0.403816	-1.17455	-0.311122	-0.159895	0.182879	-1.36461	-0.994455	-1.38186	-1.30972	-1.26411	-1.41508	1.67458	1.54257	0.746031	0.471437	0.259998	1.30253	0.814326	0.645435	0.224031	1.20707	0.81414	0.295705
Leaf_Cluster_C (1155)	Seita.1G139000	0.343672	0.321552	-0.187351	0.0401374	-0.451401	-0.302289	-0.53046	-0.505531	-0.51381	-0.620081	-0.620081	-0.620081	1.8832	3.24439	2.1453	-0.345955	-0.470199	-0.129144	-0.620081	-0.620081	-0.620081	-0.356671	-0.421022	-0.0439332
Leaf_Cluster_C (1155)	Seita.1G158400	-0.776283	-0.362391	-1.00299	-0.766357	-0.576507	-0.503357	-0.429397	-0.852488	-0.587873	-0.636674	-0.837409	-1.12667	2.40579	2.48201	0.97361	-0.267485	-0.395419	0.372075	0.0475643	0.173899	-0.090795	0.466437	0.751708	1.53901
Leaf_Cluster_C (1155)	Seita.1G159600	-1.18501	-1.44693	-1.32554	-0.366697	0.225836	0.109533	-1.00169	-1.77477	-0.752883	-0.497373	-0.650759	-0.0867893	1.83568	1.1182	0.909038	0.902693	0.806866	0.584241	-0.434375	-0.421904	-0.193833	1.0268	1.36275	1.25692
Leaf_Cluster_C (1155)	Seita.1G160000	-0.715814	-0.685982	-0.866216	0.261164	0.669406	0.299117	-0.563423	-0.779714	-0.811628	-1.63746	-1.85637	-1.30948	1.3138	1.21149	1.26648	0.0185161	-0.290178	0.196896	0.296118	-0.357833	0.118546	1.67265	1.14271	1.40721
Leaf_Cluster_C (1155)	Seita.1G166700	-0.488355	-0.810955	-1.01562	-0.362798	-0.411844	-0.570498	-1.07621	-1.03298	-0.956537	-1.50243	-1.52244	-0.880101	1.77804	1.64209	1.07775	0.74876	0.756531	0.927495	0.322714	0.0557763	0.621552	1.01009	0.869699	0.820281
Leaf_Cluster_C (1155)	Seita.1G171800	-0.847566	-0.919399	-0.919399	-0.710532	-0.833453	-0.811641	-0.39731	-0.572179	-0.13717	-0.859251	-0.919399	-0.850183	1.4812	0.789035	1.78417	1.3244	0.627167	1.65239	0.371791	-0.634338	-0.368234	1.99364	0.304864	-0.548611
Leaf_Cluster_C (1155)	Seita.1G171900	0.103921	0.932694	-0.112039	-0.834719	-1.41501	-0.875144	-0.0873979	-0.355838	0.378692	-0.314318	-1.16346	-0.778795	2.32695	1.73125	1.81619	1.01594	0.582088	0.505747	-1.20952	-1.02331	-0.250343	-0.472872	-0.402446	-0.0982585
Leaf_Cluster_C (1155)	Seita.1G181200	-0.442172	-0.491857	-0.867414	0.682787	0.298005	0.596608	-1.44907	-0.644011	-0.948685	-0.964906	-1.41533	-0.916936	2.28881	1.59976	0.902721	1.06264	0.600811	0.36011	-0.670424	-0.555247	-1.10658	0.811448	0.759331	0.509615
Leaf_Cluster_C (1155)	Seita.1G187200	-0.572242	0.148745	-1.47178	-0.123554	0.151963	-0.787792	0.0211668	-0.259686	-0.292466	-0.761474	-1.97006	-0.517648	1.2098	1.57512	1.0697	2.30731	0.942854	0.954002	-1.10522	-0.273125	-0.582172	0.711601	-0.697205	0.322165
Leaf_Cluster_C (1155)	Seita.1G198100	-0.183597	-0.896442	-0.249864	-0.381378	-0.0889656	-0.237566	0.280994	0.0974404	-1.17182	-0.888838	-1.36097	-0.183737	1.09054	2.41515	1.6541	-0.144875	-0.835203	0.0612522	-0.029473	-0.835932	-1.02754	1.69812	-0.362958	1.58157
Leaf_Cluster_C (1155)	Seita.1G202300	-0.387459	-0.606853	-0.333289	-0.546575	-0.482929	-0.405534	-1.39306	-1.12536	-1.32022	-1.32973	-1.46735	-1.22021	1.86991	1.37322	1.19277	0.611622	0.532961	0.73198	0.604516	0.715688	0.530806	1.03119	0.90999	0.51392
Leaf_Cluster_C (1155)	Seita.1G208400	-0.529396	-0.983598	-0.983598	0.597058	-0.137038	-0.983598	-0.448557	-0.983598	-0.983598	-0.983598	-0.983598	-0.983598	1.00033	1.43959	1.94515	0.730828	0.0234861	0.501412	-0.205891	-0.113575	-0.983598	1.315	1.73541	0.998579
Leaf_Cluster_C (1155)	Seita.1G215900	-0.933466	-1.11054	-0.966258	0.470501	0.372687	0.542811	-1.18308	-0.617649	-0.432487	-1.32723	-1.04546	-1.39952	1.1831	0.648966	0.334541	-0.226194	-0.852694	-0.0797895	0.53697	0.369073	0.542348	1.88694	1.89664	1.38978
Leaf_Cluster_C (1155)	Seita.1G218600	-0.34405	-0.286255	-0.285841	-1.2486	-1.08657	-0.414689	-0.583612	-0.620415	-0.750347	-0.531066	-1.19439	-0.58935	1.49484	1.82943	2.66235	0.479211	0.33522	0.928349	-0.697058	-0.46043	-0.522653	1.15953	0.295384	0.431013
Leaf_Cluster_C (1155)	Seita.1G241300	-0.525127	-0.429993	-0.672589	-1.07768	-0.773243	-0.760661	-0.892615	-0.70965	-0.907337	-1.06286	-1.20293	-0.981923	2.0795	2.11183	1.03545	-0.0321747	-0.0730445	1.24663	0.821416	0.520366	1.08868	0.475573	0.519286	0.203088
Leaf_Cluster_C (1155)	Seita.1G242700	-0.439816	0.319922	-0.875634	-0.0297227	0.201807	-0.190154	-1.08879	-0.836026	-1.23772	-1.19877	-1.02638	-0.970817	2.48227	2.3283	1.3397	-0.0855537	-0.0218682	0.0400139	-0.00950708	-0.0666757	-0.179954	1.16151	0.478116	-0.0942478
Leaf_Cluster_C (1155)	Seita.1G242800	-0.384015	-0.370004	-0.779805	-0.381021	-0.135484	-0.703918	-0.840641	-0.958907	-0.88319	-1.15911	-0.997183	-0.913209	2.15314	2.56579	1.62331	0.112365	-0.442619	0.552183	-0.201409	-0.166764	0.411231	0.625989	0.459709	0.813559
Leaf_Cluster_C (1155)	Seita.1G250600	-0.555451	-0.470297	-0.682677	-0.583776	-0.523571	-0.555483	-0.951498	-0.935061	-1.3297	-1.02823	-1.23087	-1.18352	1.03163	1.03085	1.21704	0.627416	0.638523	0.881786	-0.212758	0.0878139	-0.222556	1.57459	1.90371	1.47208
Leaf_Cluster_C (1155)	Seita.1G253600	-1.70359	-0.0896758	0.20431	-1.73019	0.05351	0.317407	0.348818	0.0347631	-0.669852	-0.880126	-0.674466	-1.03772	1.37052	2.06304	1.70516	-0.181603	-1.33468	-0.00705048	1.48605	-0.497118	0.801642	0.0860244	0.00183755	0.332982
Leaf_Cluster_C (1155)	Seita.1G257200	-0.690694	-0.726261	-0.751802	-0.867404	-0.917126	-0.858849	-0.595239	-0.740839	-1.0101	-0.717718	-0.983419	-0.906956	2.37304	1.37902	1.25654	1.51216	1.18314	1.21851	0.541146	0.12759	0.484936	-0.173216	-0.11375	-0.0227151
Leaf_Cluster_C (1155)	Seita.1G260100	-0.742206	-0.742206	-0.742206	-0.523366	-0.742206	-0.742206	-0.742206	-0.658545	-0.742206	-0.742206	-0.742206	-0.742206	2.85314	2.24782	0.633372	0.52583	0.327159	1.09995	1.13223	0.253852	0.190863	-0.347379	-0.00877486	-0.30409
Leaf_Cluster_C (1155)	Seita.1G263000	-0.294205	-0.469243	-0.732302	-0.974079	-0.863437	-1.02549	-0.771214	-0.701661	-0.693347	-0.683476	0.211825	-0.79859	2.87892	1.76663	1.0043	0.941961	1.07344	1.0093	0.402646	-0.0903995	-0.826932	-0.515344	0.283159	-0.132457
Leaf_Cluster_C (1155)	Seita.1G265600	-0.768433	-0.768433	-0.768433	-0.768433	-0.768433	-0.768433	-0.768433	-0.768433	-0.768433	-0.768433	-0.744658	-0.768433	1.40451	1.59093	1.77369	1.48622	1.64352	1.72491	0.310447	-0.322413	0.185039	0.000273546	-0.318607	-0.281096
Leaf_Cluster_C (1155)	Seita.1G268000	-0.816132	0.0170432	-0.66771	-1.39017	-1.01674	-1.07426	-0.634566	-0.969851	-0.291483	-0.23152	-1.11529	-0.814388	2.31919	2.15529	1.08346	0.531684	0.665665	0.502738	-0.098886	0.128095	-0.460463	1.15089	0.277499	0.749902
Leaf_Cluster_C (1155)	Seita.1G269900	-0.64164	-0.276283	0.158823	1.06691	0.588082	0.406468	-0.527903	-0.64164	-0.64164	-0.604263	-0.64164	-0.64164	2.89462	2.40763	1.34286	-0.64164	-0.0885266	0.0590555	-0.64164	-0.634403	-0.64164	-0.571823	-0.539412	-0.548728
Leaf_Cluster_C (1155)	Seita.1G273100	-1.37444	-0.65274	-0.603733	0.105178	0.894145	-0.535757	-0.336349	-1.08528	-1.62616	-0.187152	-1.21531	-0.82486	1.67577	0.776617	2.0123	1.11727	-0.0344468	-0.0628959	1.15133	0.65499	-0.402408	1.43894	-0.476058	-0.408947
Leaf_Cluster_C (1155)	Seita.1G273300	-0.863746	-0.954957	-0.932575	-0.726243	-0.506427	-0.622857	-0.685011	-0.87526	-1.25312	-0.973747	-1.31954	-1.11106	1.407	1.4269	1.64869	0.827895	0.502883	0.643684	0.896044	0.582135	-0.100889	1.47035	0.848305	0.67155
Leaf_Cluster_C (1155)	Seita.1G275700	-0.363027	-0.627624	-0.638873	-0.601001	-0.0490508	0.0673291	-1.04575	-1.12874	-1.44008	-1.00731	-1.06063	-0.716726	2.82434	1.82327	1.2854	0.722572	0.745152	0.431029	0.166715	0.474376	0.120471	0.287512	-0.147283	-0.122086
Leaf_Cluster_C (1155)	Seita.1G275800	-0.396853	-1.10031	-0.764985	-0.608632	-0.671421	-1.01979	-0.341944	-1.10752	-0.847513	-0.658485	-1.3127	-1.24809	1.44731	2.04929	1.22347	0.263872	0.690332	0.886709	1.38252	1.14891	0.801928	0.533813	0.00513038	-0.35504
Leaf_Cluster_C (1155)	Seita.1G287100	-0.402894	0.365921	-0.197501	-0.257534	-0.274399	-0.47879	-0.459499	-1.07571	-0.626198	-0.0019341	-0.525144	-0.926211	2.22435	3.05565	1.67168	0.747961	0.188864	0.0713699	-0.361509	-0.360422	-0.671662	-0.619313	-0.41265	-0.67443
Leaf_Cluster_C (1155)	Seita.1G297600	-0.692986	-0.549947	-1.00918	-1.5399	-1.72734	-0.962259	-0.643218	-0.467527	-1.19803	-0.0767347	-0.768459	-0.589546	1.5518	1.78846	0.564969	0.484358	0.292298	0.945419	0.517151	0.668038	0.128489	1.57169	1.07984	0.632615
Leaf_Cluster_C (1155)	Seita.1G301300	-0.845528	-0.999712	-1.32898	0.23135	-0.00481692	-0.242061	-0.698102	-0.662992	-0.363447	-0.617564	-0.945886	-0.850919	1.3699	1.54091	0.844093	0.14856	-0.098733	-0.0663059	-0.628159	-0.694271	-0.590326	1.75842	1.77115	1.97341
Leaf_Cluster_C (1155)	Seita.1G301600	-0.71631	-0.876549	-0.876549	-0.876549	-0.876549	-0.783878	-0.78397	-0.876549	-0.768578	-0.781954	-0.876549	-0.876549	1.62341	2.1758	0.958593	-0.263193	-0.0966046	1.94814	0.615595	0.863131	0.20934	0.849594	0.411237	0.675499
Leaf_Cluster_C (1155)	Seita.1G309200	-0.394711	-0.501332	-0.515586	-0.370307	-0.75498	0.755578	0.0642822	0.0486099	0.635549	-1.5876	-1.01751	-1.77312	2.24717	1.67448	1.81097	0.590793	-0.500935	-0.244746	-0.532328	-0.256376	-0.831315	0.797238	0.684889	-0.0287148
Leaf_Cluster_C (1155)	Seita.1G309600	-0.537321	-0.871957	-0.823271	-1.02441	-0.853199	-1.02441	-0.977364	-0.920079	-0.968677	-0.907134	-0.849444	-1.02441	1.68143	1.81554	1.10647	0.844375	1.05811	0.97156	0.624123	0.669797	-0.213326	1.26481	0.629778	0.329003
Leaf_Cluster_C (1155)	Seita.1G312600	-0.921626	0.150879	-0.591807	-0.55503	-0.259328	-0.775402	-0.316529	-0.837901	-0.836371	-0.976561	-0.895244	-1.06762	3.02087	1.9253	1.09254	0.793021	0.0740068	0.530868	0.343153	0.0732652	-0.68782	0.413946	-0.417711	0.721096
Leaf_Cluster_C (1155)	Seita.1G315200	-0.905741	-0.877125	-0.933	-0.750087	-0.509948	-0.533625	-0.966707	-0.961424	-0.971213	-1.00914	-1.00914	-0.984424	2.33588	1.83999	1.30385	0.265442	0.334312	0.607372	0.527021	0.536855	0.345476	0.968792	0.693442	0.653137
Leaf_Cluster_C (1155)	Seita.1G322300	-0.450992	-0.345738	-0.441749	-0.519366	-0.255506	-0.321596	-0.881264	-0.584711	-0.82525	-1.19523	-1.11119	-1.02043	2.42909	2.33707	0.904164	0.862651	0.839672	0.798063	0.299397	0.835094	0.394921	-0.259227	-1.02347	-0.464417
Leaf_Cluster_C (1155)	Seita.1G324300	-0.775106	-0.475833	-0.874095	-0.497661	-0.586783	-0.652281	-1.06314	-0.923715	-0.851046	-1.19633	-1.23802	-1.30732	1.91704	1.62337	1.1906	1.31487	1.10728	1.18216	0.449991	0.420514	0.323978	0.63577	0.180714	0.0950387
Leaf_Cluster_C (1155)	Seita.1G325600	-0.882874	-0.67049	-0.412161	-0.569776	-0.325153	0.279514	-1.23497	-1.07556	-1.13199	-1.14221	-1.15693	-0.844532	1.85748	1.95297	1.4389	0.414379	-0.0922476	1.59645	-0.437882	0.363751	0.323232	0.50591	0.97617	0.268023
Leaf_Cluster_C (1155)	Seita.1G335200	-2.16023	-1.13155	-0.467284	-0.090382	-0.0574069	-0.260345	0.16107	-0.211739	-0.749757	-1.15504	-1.31171	-1.57967	0.786805	2.17412	1.43434	0.920263	0.584952	0.931273	0.458569	0.210174	0.424174	0.70005	-0.0426855	0.432016
Leaf_Cluster_C (1155)	Seita.1G335400	-0.73678	-0.460775	-0.698701	-1.11409	-1.61052	-1.45784	0.212788	0.00823373	-0.0372555	-0.358483	-0.811437	-0.0835544	1.32904	1.07254	1.23384	-1.25347	-1.23842	-0.466447	0.674819	1.2544	1.0763	1.13369	1.13231	1.19981
Leaf_Cluster_C (1155)	Seita.1G343600	-0.783535	-0.719481	-0.829934	-0.406868	-0.0985718	-0.635514	-0.626679	-0.889415	0.212119	-0.566748	-0.938221	-0.296625	2.23666	1.00057	1.62683	0.388719	0.367886	-0.0956956	-1.69373	-0.681006	-0.487559	0.800144	1.74419	1.37246
Leaf_Cluster_C (1155)	Seita.1G353200	-1.05019	-0.78341	-1.12715	1.10658	-0.0027892	0.212768	0.441342	0.0456371	-1.15069	-0.464663	-1.40098	-0.471107	1.57073	2.04443	1.72541	-0.000711076	1.09277	1.05663	-1.45906	0.0267791	-0.770754	-0.323827	-0.222171	-0.0955929
Leaf_Cluster_C (1155)	Seita.1G353500	-0.974187	-0.8521	-1.30109	-0.918494	-0.939942	-1.00402	0.35998	0.262941	0.56914	-1.50452	-0.965341	-1.68189	1.79893	1.69722	1.09694	0.530537	-0.194361	0.315316	0.845384	0.420314	0.393175	1.01284	0.570389	0.462851
Leaf_Cluster_C (1155)	Seita.1G354600	-0.437134	-0.312655	-0.645541	-0.282423	-0.201265	-0.710429	-0.359632	-0.842188	-0.753395	-0.990153	-0.961598	-0.931207	2.01934	1.97428	1.0254	1.49095	1.69884	1.45221	-0.612439	-0.244053	-0.0477527	-0.640306	-0.628987	-0.059873
Leaf_Cluster_C (1155)	Seita.1G356800	-1.07585	-0.693949	-0.768637	0.178641	0.260917	-0.111141	-0.738695	-0.682214	-1.05426	-1.07412	-0.752145	-1.05861	2.78979	1.89796	0.647036	0.405545	0.47304	0.926432	-0.337339	-0.997365	-0.298031	0.61826	0.826295	0.618421
Leaf_Cluster_C (1155)	Seita.1G361200	-0.485594	0.245438	-0.318325	-1.14257	-0.473202	-0.770944	-0.233614	-0.186533	-0.651768	-0.770549	-0.974904	-0.708005	2.44414	2.78852	1.1449	-0.4809	-1.08926	-0.573328	0.606791	0.565761	0.530503	0.309105	0.00745414	0.216887
Leaf_Cluster_C (1155)	Seita.1G373700	-1.13521	-0.656614	-0.41621	0.284476	-0.379187	-0.912282	-0.90911	-1.02559	-1.26502	-1.10956	-1.28287	-1.28516	1.13583	1.39925	1.24369	0.73206	1.56479	0.840528	-0.242879	0.14832	0.133347	1.37945	0.950642	0.807308
Leaf_Cluster_C (1155)	Seita.1G378000	-0.77032	-0.210839	-0.965075	-1.19557	-0.627749	-0.822567	-0.181163	-0.885186	-0.903193	-0.550165	-0.88789	-0.888488	1.19995	1.93273	1.75453	-0.401778	-0.302763	0.00999517	0.580959	0.310127	-0.279361	1.04509	0.931846	2.10689
Leaf_Cluster_C (1155)	Seita.1G380000	-0.703832	-0.556998	-0.391697	-0.703832	-0.703832	-0.703832	-0.703832	-0.530895	-0.703832	-0.63602	-0.576139	-0.703832	3.21483	2.12972	1.30173	-0.115433	-0.419577	0.160809	-0.014818	0.0740723	-0.421492	0.295563	0.723225	0.689945
Leaf_Cluster_C (1155)	Seita.2G001400	-1.06825	-0.805061	-1.26632	-0.929818	-0.338183	-0.998655	-0.77825	-0.899204	-0.646971	-0.474712	-0.768594	-0.845249	2.49791	2.03764	1.15346	0.510376	0.331312	0.791402	0.324839	0.664843	0.637356	-0.127347	0.296809	0.700671
Leaf_Cluster_C (1155)	Seita.2G003000	-0.380422	-0.380422	-0.380422	-0.380422	-0.380422	-0.380422	-0.380422	-0.380422	-0.380422	-0.380422	-0.380422	-0.380422	2.76168	3.22539	1.4276	-0.380422	-0.380422	0.193762	-0.380422	-0.380422	-0.380422	-0.380422	-0.380422	-0.380422
Leaf_Cluster_C (1155)	Seita.2G035400	-0.765376	-0.659322	-0.466779	-0.812303	-0.812303	-0.812303	-0.33381	-0.497879	-0.624915	-0.685396	-0.812303	-0.706146	2.29725	1.12962	1.53639	-0.812303	-0.812303	-0.812303	1.2119	1.57708	0.320846	1.37126	0.702666	0.278727
Leaf_Cluster_C (1155)	Seita.2G043200	-0.300395	0.243011	-0.0541003	-0.435964	-0.967773	-0.490188	-0.436657	-0.57151	-0.944946	-0.54948	-0.831271	-0.599235	2.95946	2.27755	1.75341	0.643731	0.596678	-0.0790271	-0.395594	-0.356921	-0.173164	-0.362052	-0.6186	-0.306965
Leaf_Cluster_C (1155)	Seita.2G045600	-0.0558194	0.0832028	0.145701	0.705235	0.722526	0.734334	-0.897726	-0.568708	-0.980094	-0.910986	-1.00022	-1.03843	1.26845	1.17382	0.980899	1.53814	1.79915	1.50121	-1.01577	-1.05957	-0.863231	-0.74142	-0.744787	-0.775904
Leaf_Cluster_C (1155)	Seita.2G050200	-0.626717	0.392906	-0.679371	-0.292785	-0.805749	1.07331	-0.789882	-0.830836	-0.731753	-0.68818	-0.826121	-0.812906	0.820007	0.800698	0.953882	0.588218	0.453547	0.0850092	-0.712256	-0.468556	-0.439324	3.56856	-0.0313332	-0.000366931
Leaf_Cluster_C (1155)	Seita.2G057400	-0.190599	-0.454519	-0.346079	-0.504409	-0.458626	-0.582658	-0.61345	-0.545498	-0.378211	-0.694848	-0.514837	-0.671347	1.74676	3.48725	1.31592	-0.2354	0.889281	-0.605305	-0.571317	-0.466286	-0.286599	-0.0442819	-0.25813	0.983194
Leaf_Cluster_C (1155)	Seita.2G058900	-0.829937	-0.65433	-0.816228	-0.293391	-0.499791	-0.116226	-0.719915	-0.700142	-0.702671	-1.46501	-1.43226	-1.48871	1.92632	1.32035	1.19925	0.899393	0.126056	0.802317	1.40987	1.02837	0.0836823	1.19818	0.0424148	-0.317598
Leaf_Cluster_C (1155)	Seita.2G069800	-1.33377	-0.661577	-1.22828	-0.883766	-0.704338	-0.662349	-0.291714	-0.408657	-0.917771	0.495222	0.0274256	-0.198703	2.32816	2.0541	1.557	1.28018	1.10631	-0.0370522	-0.777555	-0.560235	-0.526834	0.138554	0.017486	0.188167
Leaf_Cluster_C (1155)	Seita.2G070700	-0.320655	0.833836	-0.711646	1.16592	-0.787606	0.918072	-0.787606	-0.787606	-0.736455	-0.74708	-0.787606	-0.787606	1.51031	1.49482	1.59323	1.68626	1.01094	0.881142	-0.787606	-0.787606	-0.787606	-0.787606	-0.787606	-0.702635
Leaf_Cluster_C (1155)	Seita.2G080200	-0.424918	-0.424918	-0.424918	-0.424918	-0.424918	-0.424918	-0.424918	-0.424918	-0.424918	-0.424918	-0.424918	-0.424918	3.21479	2.39255	1.89109	-0.424918	-0.424918	-0.339953	0.3077	0.0451905	-0.424918	-0.424918	-0.287772	-0.424918
Leaf_Cluster_C (1155)	Seita.2G083700	-0.0256297	0.0846931	0.0468653	-0.588123	-0.328364	-0.0842124	-0.504034	-0.29386	-0.703294	-0.719004	-0.588723	-0.817073	2.94085	1.24176	2.86811	-0.619489	0.0913016	0.0597983	0.161774	-0.653812	-0.817073	-0.0860211	-0.330526	-0.335904
Leaf_Cluster_C (1155)	Seita.2G089100	-0.0818537	-0.608587	-0.453195	-0.538056	-0.534059	-0.184327	-0.565316	-0.57716	-0.669412	-0.669412	-0.568765	-0.549913	2.49145	1.10608	3.28883	-0.349526	0.276073	0.0425875	-0.669412	-0.252092	-0.618099	0.447375	-0.0616595	0.298461
Leaf_Cluster_C (1155)	Seita.2G095900	-0.130966	-1.26705	-1.44224	-0.28554	-0.148401	-0.393684	-0.800055	-0.587707	-0.87444	-1.04529	-1.07748	-0.959418	1.86396	2.15734	1.2809	1.13374	0.892475	0.953175	0.113889	0.392239	-0.133007	0.810485	0.226908	-0.679836
Leaf_Cluster_C (1155)	Seita.2G107900	-0.529204	-0.728671	-0.489641	-0.927409	-0.679882	0.253811	-1.08964	-0.473009	-0.838116	-0.973171	-1.1946	-1.1946	0.884207	0.990063	1.35401	0.819776	0.210151	1.33556	0.163762	0.0799315	-1.0824	1.76237	2.03596	0.310753
Leaf_Cluster_C (1155)	Seita.2G108400	-1.20954	-1.04526	-1.48436	-0.20462	0.500124	-0.418261	-0.744256	-1.20543	-0.76232	-0.370736	0.150728	-0.0278958	1.1183	0.791021	0.691613	0.188047	0.357508	-0.349011	-0.806195	0.660911	-1.20105	1.96633	1.38996	2.0144
Leaf_Cluster_C (1155)	Seita.2G119700	0.0831568	-0.210517	-0.747892	-0.450903	0.956942	0.590548	-0.964887	-1.0238	-0.504123	-1.21248	-0.457763	-1.12165	1.94015	2.56037	1.45859	0.0299498	0.698651	0.80171	0.16932	-0.754327	-0.895122	-0.718535	0.22583	-0.453231
Leaf_Cluster_C (1155)	Seita.2G128600	-1.00856	0.107964	-0.244236	-0.746609	-0.614495	-0.586479	-1.07981	-0.706116	-0.969841	-1.10337	-1.15902	-1.12951	2.18827	1.40861	1.76898	0.739738	0.517132	0.36712	0.453408	0.635242	-0.662698	1.12957	0.969388	-0.274686
Leaf_Cluster_C (1155)	Seita.2G137200	-0.179635	-1.63509	-0.340014	-0.308355	-0.474351	-0.731793	-0.165849	-0.179811	-0.828411	-1.09191	-1.71565	-0.351711	1.76427	0.646042	1.08778	-0.124404	-0.329706	-0.906513	-0.418027	0.825551	1.05463	1.3112	1.23683	1.85492
Leaf_Cluster_C (1155)	Seita.2G142900	-0.421575	-0.641721	-1.04048	-1.22115	-1.17852	-1.2217	0.379384	0.1395	-0.240311	-0.102281	-0.458036	0.584547	0.982	1.10043	2.30246	-0.930934	-0.0325723	-0.53379	-0.782788	-0.537969	-0.39558	1.34264	0.97881	1.92964
Leaf_Cluster_C (1155)	Seita.2G148000	-0.653764	-0.950775	-0.761225	-0.76024	-0.685877	-0.694875	-0.750685	-0.846005	-0.649518	-0.774656	-0.760838	-0.955366	1.83415	1.15906	1.12351	0.89582	2.08857	1.42912	-0.82654	-0.353816	-0.151202	0.190412	0.90761	0.947132
Leaf_Cluster_C (1155)	Seita.2G149300	0.150641	0.498931	-0.200127	-0.039376	0.0314414	0.354996	-1.40507	-1.32008	-1.78609	-1.03318	-0.958852	-0.77529	2.3544	2.11016	1.04079	0.696325	0.426419	0.776093	-0.2174	-0.192897	-0.598669	-0.286358	0.433675	-0.0604862
Leaf_Cluster_C (1155)	Seita.2G156300	-0.393648	-0.744604	-0.579284	-0.408429	-0.492057	-0.744604	-0.744604	-0.641094	-0.744604	-0.744604	-0.744604	-0.744604	2.47463	2.41888	1.6991	0.452729	0.710022	0.921615	-0.560145	-0.705429	-0.552916	0.384479	0.298435	0.18535
Leaf_Cluster_C (1155)	Seita.2G156700	-0.0366641	-0.303246	-0.0380138	0.0853548	-0.632897	-0.338683	-1.20833	-0.915532	-1.05037	-0.997619	-1.60333	-0.421472	2.69885	2.11929	1.29349	-0.0211249	0.133106	0.197933	-0.531248	-0.160038	-0.233426	0.484094	0.881804	0.598059
Leaf_Cluster_C (1155)	Seita.2G159600	-0.840557	-0.840557	-0.840557	-0.840557	-0.840557	-0.840557	-0.716568	-0.781901	-0.729106	-0.840557	-0.840557	-0.840557	1.90722	1.55608	1.27992	1.53364	1.31465	1.62846	0.205498	0.14119	-0.317843	0.461462	0.33769	-0.255393
Leaf_Cluster_C (1155)	Seita.2G160700	0.673428	0.186359	0.300427	-0.38882	-0.422911	-0.3725	-0.563314	-0.563314	-0.563314	-0.563314	-0.563314	-0.563314	2.32199	3.25197	1.4603	0.0424011	-0.126746	-0.16613	-0.563314	-0.563314	-0.563314	-0.563314	-0.563314	-0.563314
Leaf_Cluster_C (1155)	Seita.2G161000	0.140118	0.345653	0.0981953	-0.0337613	-0.249539	-0.585132	-0.615673	-0.615673	-0.615673	-0.615673	-0.615673	-0.615673	3.08289	2.45071	1.41497	0.340125	-0.120411	0.504258	-0.615673	-0.615673	-0.615673	-0.615673	-0.615673	-0.615673
Leaf_Cluster_C (1155)	Seita.2G167400	-0.13977	-0.577705	-0.332002	0.0262076	0.0547807	-0.0749812	-1.52435	-1.34075	-1.54456	-1.43773	-1.50583	-1.14778	1.40863	1.3712	1.35142	1.13564	1.00618	1.23014	0.07891	0.26209	0.254016	0.453915	0.606474	0.385857
Leaf_Cluster_C (1155)	Seita.2G167900	-0.47887	-0.346952	-0.414848	0.0340936	0.0215067	-0.16133	-1.22644	-0.846704	-0.679039	-1.30883	-1.08174	-1.17938	1.79201	1.55525	1.13199	0.987039	1.08584	1.20761	0.920603	0.972549	0.769444	-1.11186	-0.84901	-0.792937
Leaf_Cluster_C (1155)	Seita.2G168200	-0.647734	-1.43005	-0.485418	-0.724356	0.345954	-0.501561	-0.643853	-0.0491957	-0.00429164	-0.550491	-0.599188	-0.545955	2.34975	2.62919	0.980629	-0.482206	0.0413929	-0.232266	-0.684225	-0.860028	0.0130973	1.1802	-0.367173	1.26778
Leaf_Cluster_C (1155)	Seita.2G182700	-0.860628	-0.86355	-0.995524	0.914946	0.642273	0.810369	-1.89196	-1.8337	-1.40506	0.176222	-0.878577	-0.178871	1.29084	0.450008	0.66028	0.440243	0.932998	0.504536	-0.482164	-0.28934	-0.731513	1.27263	0.945983	1.36956
Leaf_Cluster_C (1155)	Seita.2G183600	0.113648	0.0609878	0.1802	0.315046	-0.370396	-0.200674	-0.231102	-0.205018	-0.873945	-0.646365	-0.54674	-0.579925	2.06334	2.95132	2.24264	-0.873945	-0.683017	-0.787548	-0.360934	0.0380066	-0.189548	-0.439249	-0.292656	-0.684134
Leaf_Cluster_C (1155)	Seita.2G183700	0.447037	-0.381621	-0.11738	-0.30668	-0.421616	-0.551486	0.112293	-0.41267	-0.42948	-0.349484	-0.551486	-0.437346	1.89795	3.54897	1.76953	-0.443953	-0.435955	-0.551486	-0.551486	-0.149123	-0.408476	-0.354028	-0.370531	-0.551486
Leaf_Cluster_C (1155)	Seita.2G187000	-0.781598	-0.781598	-0.369569	-0.231599	-0.213012	-0.0749519	-0.625129	-0.50983	-0.596252	-0.781598	-0.781598	-0.601837	2.67719	2.16242	2.39454	0.853417	-0.128577	-0.107879	-0.22577	-0.265197	-0.45495	-0.238428	0.138656	-0.456846
Leaf_Cluster_C (1155)	Seita.2G193200	-0.561916	0.142658	-0.729914	-0.0977381	-0.409078	-0.0484247	-1.34056	-0.751661	-0.950186	-1.80953	-1.90845	-1.44648	1.54136	1.50082	0.558156	0.817747	0.795962	1.03721	0.810886	0.695639	0.697787	0.515879	0.579614	0.360227
Leaf_Cluster_C (1155)	Seita.2G193400	-0.780945	-0.740014	-0.732621	-0.736129	-0.780945	-0.671288	-0.780945	-0.673202	-0.780945	-0.780945	-0.761455	-0.780945	0.908825	1.16504	1.23833	-0.287996	-0.430875	-0.335658	0.378751	0.47743	-0.0456325	1.94286	1.87757	2.11174
Leaf_Cluster_C (1155)	Seita.2G200100	-0.664706	-0.627963	-0.720452	-0.71218	-0.646163	-0.680539	-0.718776	-0.744976	-0.680825	-0.71766	-0.693319	-0.744976	3.2429	1.62808	1.44819	0.508162	-0.128611	0.628791	0.309816	0.219464	-0.554865	0.845986	0.257172	-0.0525446
Leaf_Cluster_C (1155)	Seita.2G200200	-0.99895	-0.398355	-0.842028	-0.787956	-0.982645	-1.0674	-0.877939	-0.86922	-1.02679	-0.904271	-0.955923	-1.0674	1.90165	1.61701	0.91399	0.540881	0.601533	1.41158	0.71683	0.840146	-0.0483615	1.14378	0.74869	0.391157
Leaf_Cluster_C (1155)	Seita.2G205600	-2.9752	0.399987	-2.50369	0.295459	0.307121	0.0837432	-0.586064	-0.35877	-0.498344	-0.333436	-0.686634	-0.434025	1.36015	1.12139	0.849203	0.559022	0.525544	0.678117	0.600073	0.119591	0.527096	0.658629	0.275857	0.0151788
Leaf_Cluster_C (1155)	Seita.2G209000	-0.645139	-0.183095	-0.729102	-1.02138	-1.02138	-0.938909	-0.240897	-0.31334	-1.02138	-0.22248	-1.02138	-0.572361	1.51896	2.6705	0.264581	-0.640288	-1.02138	1.02394	1.27929	0.00298761	0.574935	1.03903	1.17115	0.0471582
Leaf_Cluster_C (1155)	Seita.2G209500	-0.0657012	-0.775943	-0.899918	0.241427	0.763345	-0.256497	-0.412258	-0.489823	0.0187546	-1.30738	-1.08729	-0.172867	1.42263	2.08594	3.14163	-0.258741	-0.403102	-0.261455	-0.3962	-0.419137	-0.758955	-0.0733855	0.28753	0.0773978
Leaf_Cluster_C (1155)	Seita.2G210300	-0.0138104	-0.0822056	-0.384721	-0.508403	-0.326597	-0.508139	-0.693301	-0.582513	-0.59181	-0.645444	-0.556724	-0.416145	2.64893	2.51885	1.47983	0.873975	0.237223	1.22664	-0.671393	-0.649592	-0.600417	-0.652236	-0.62107	-0.480927
Leaf_Cluster_C (1155)	Seita.2G216500	-0.768444	-1.73998	-0.894635	0.256857	0.319811	0.417047	-0.879302	-0.515876	-0.567377	-1.55123	-1.32873	-1.06088	1.46911	1.02214	1.09921	0.632098	-0.326734	0.615777	0.287123	-0.51517	-0.121152	1.13127	1.71497	1.30409
Leaf_Cluster_C (1155)	Seita.2G218700	-0.530406	-0.0835591	-0.351944	-1.21071	-1.01089	-0.827349	-0.633619	-0.735931	-0.659869	-1.39058	-1.20942	-1.38699	2.12232	1.89302	1.39145	0.155913	0.265661	0.638559	0.766973	0.541836	0.594781	0.707024	0.469036	0.484702
Leaf_Cluster_C (1155)	Seita.2G219700	-1.30939	-0.891931	-1.32994	-0.450701	-0.976252	-0.445696	-0.217789	-0.907845	-1.37422	-0.235429	-0.633652	-0.641642	2.28404	0.127701	1.42649	1.45393	0.621911	-0.180959	0.151134	0.678076	-0.000368433	1.37473	0.253262	1.22455
Leaf_Cluster_C (1155)	Seita.2G237300	-0.556435	-0.694608	-1.32846	0.0830381	-0.289609	0.340195	-0.87589	-0.308339	-0.12808	-1.02869	-0.63831	-1.64562	1.97255	2.11297	1.03901	-0.823228	-0.898596	-0.244773	0.726548	0.207987	0.198498	1.29944	1.37626	0.104152
Leaf_Cluster_C (1155)	Seita.2G239700	-0.580071	0.724835	-0.70778	0.617493	1.041	1.48745	-1.01728	-0.976655	-0.808435	-1.0008	-1.15672	-0.911907	1.47095	1.1375	1.52794	0.622419	1.25948	1.24003	-0.86667	-0.78708	-0.835075	-0.57884	-0.579363	-0.322425
Leaf_Cluster_C (1155)	Seita.2G246900	-0.466704	-0.559073	-1.17189	-0.0395573	0.243699	-0.446008	-0.542716	-0.587945	-1.32388	-1.24434	-1.30489	-1.27517	2.01322	1.59005	1.00004	0.51847	-0.109043	0.449205	0.817679	0.178821	-0.925466	1.62706	0.983804	0.574638
Leaf_Cluster_C (1155)	Seita.2G253500	-0.410063	-0.956383	-1.04443	0.163232	0.943643	-0.26197	0.247918	0.164669	-0.804696	-0.24894	-1.10965	-0.0254542	1.6348	1.56481	2.25464	0.608988	0.862712	-0.0956029	0.00388109	-1.26208	-1.50013	-1.31586	-0.313359	0.899312
Leaf_Cluster_C (1155)	Seita.2G266700	-0.615938	-0.446605	-1.04265	0.226492	-0.285142	-0.0606067	-1.23885	-0.719172	-1.332	-1.50582	-1.83206	-1.19255	1.68604	1.46351	0.422862	1.00228	0.705315	0.976767	0.669711	0.652611	0.55825	0.908961	0.811644	0.186947
Leaf_Cluster_C (1155)	Seita.2G266800	-0.120815	-0.767125	-0.791977	-0.925336	-0.46282	-0.405762	-0.830459	-0.94039	-1.28685	-1.57496	-1.41976	-1.26072	1.69088	1.47633	0.974187	0.78125	0.588765	0.834787	0.351981	0.788683	0.587171	0.755327	0.987487	0.970123
Leaf_Cluster_C (1155)	Seita.2G273900	-0.557951	0.226124	-0.236843	-0.850402	-0.663493	-0.13164	0.269192	-0.297635	-0.511691	-0.698486	-0.569511	-0.52189	1.85223	3.38045	1.80288	-0.414878	-0.199953	-0.521303	-0.205361	0.499969	-0.423115	0.0547827	-0.588015	-0.693462
Leaf_Cluster_C (1155)	Seita.2G280200	-0.896663	-0.827646	-0.73987	0.893279	0.0423108	0.539799	-0.8772	-0.634991	-1.19977	-0.545922	-0.726464	-0.764181	1.92769	1.02006	0.919619	-1.46051	0.540307	1.04384	0.433759	-0.224312	-0.745506	2.42353	-0.237964	0.0968167
Leaf_Cluster_C (1155)	Seita.2G284800	-1.53143	-1.50058	0.493839	1.13005	0.507107	0.812923	-0.2796	-1.5439	-1.52852	-0.136412	-1.54674	-1.50369	1.35265	0.904902	1.20443	0.310538	0.516777	-0.159803	0.00965091	0.317223	-0.0915434	0.465536	0.716746	1.07984
Leaf_Cluster_C (1155)	Seita.2G292400	-1.37713	-1.68011	-1.99645	-1.14071	-0.34924	-0.699567	0.0643375	-0.339062	-0.719694	-0.0550765	0.226779	0.0467198	1.03438	0.808522	1.8916	0.613905	0.322767	0.495686	-0.094202	-0.62436	-0.352137	1.36844	1.24744	1.30716
Leaf_Cluster_C (1155)	Seita.2G300300	-0.673939	-0.372663	-1.3518	0.427963	0.43579	-0.00407333	-0.638351	-0.797102	-0.913719	-0.957707	-1.29359	-1.0288	2.4037	2.21358	0.783369	0.843194	0.577272	0.797008	-0.518386	-0.563302	-0.660569	0.428432	0.176905	0.686776
Leaf_Cluster_C (1155)	Seita.2G301400	0.654942	0.608193	0.626388	0.758587	0.818282	0.83015	-0.958964	-0.958964	-0.958964	-0.958964	-0.958964	-0.958964	1.41854	1.40477	1.2694	1.02537	1.02864	1.06431	-0.958964	-0.958964	-0.958964	-0.958964	-0.958964	-0.958964
Leaf_Cluster_C (1155)	Seita.2G301900	1.34156	1.24125	1.05206	-0.550186	-0.550186	-0.550186	-0.550186	-0.550186	-0.550186	-0.550186	-0.550186	-0.550186	2.13389	2.02762	2.10696	-0.550186	-0.550186	-0.550186	-0.550186	-0.550186	-0.550186	-0.550186	-0.550186	-0.550186
Leaf_Cluster_C (1155)	Seita.2G302100	-0.116618	-0.170454	-0.36699	-0.424233	-0.217519	-0.191438	-0.533439	-0.430209	-0.494343	-0.504677	-0.512536	-0.473386	2.20539	2.39506	-0.0178514	-0.542433	-0.358015	-0.496656	-0.444948	-0.220169	-0.293671	-0.274534	-0.538813	3.02248
Leaf_Cluster_C (1155)	Seita.2G302900	-0.050911	0.416057	-0.26879	-0.467266	-0.29277	-0.373753	-0.467266	-0.296525	-0.464899	-0.321791	-0.467266	-0.360788	2.38018	3.06666	2.09058	-0.467266	-0.383333	-0.467266	-0.467266	-0.467266	-0.467266	-0.467266	-0.467266	-0.467266
Leaf_Cluster_C (1155)	Seita.2G308400	-1.04326	-0.450108	-0.627215	-1.16775	0.88084	-1.02748	-0.823259	-0.455861	-1.39711	-0.170251	-1.13615	-0.194947	1.72503	0.999316	1.10396	-0.273359	1.40197	1.92918	-0.679902	0.260764	1.21287	-0.258499	0.760263	-0.56904
Leaf_Cluster_C (1155)	Seita.2G310800	-0.362745	-0.689271	0.253637	-0.843388	-0.123594	0.0129063	-0.540055	-0.628999	-0.417734	-0.736291	-0.969259	-0.612614	1.68763	1.26752	3.64435	-0.504648	-0.196607	-0.060616	0.139429	-0.3881	-0.642985	0.0176917	0.232515	0.461233
Leaf_Cluster_C (1155)	Seita.2G315800	-0.375307	-1.13773	-0.879402	-0.148767	-0.689846	0.217742	-1.38138	-0.90048	-0.88932	-1.27504	-1.19665	-1.12941	1.2373	1.9417	0.527127	1.10399	0.328523	1.05337	-0.0178234	0.230016	-0.00209942	1.32443	0.549823	1.50923
Leaf_Cluster_C (1155)	Seita.2G319800	-0.069368	0.361733	-0.636476	0.230216	0.0317423	0.780999	-1.30526	-1.50554	-1.46681	-0.708125	-1.1188	-0.859744	1.5402	0.626838	1.5407	2.21422	0.64977	0.296138	-0.867837	-0.16109	-0.505173	1.18269	-0.412714	0.161689
Leaf_Cluster_C (1155)	Seita.2G321400	-0.673034	-0.864889	-0.840798	-0.647989	-0.611099	-0.805007	-1.25049	-0.627726	-0.491509	-1.30111	-1.0485	-1.14643	0.987038	2.1713	1.46518	0.541368	0.546832	0.165159	0.428381	0.324768	0.0670556	1.49106	0.810188	1.31024
Leaf_Cluster_C (1155)	Seita.2G323400	-0.345114	-0.773399	-0.673022	0.0329476	0.752623	0.307825	-0.119556	-0.389661	-0.643746	-0.773399	-0.773399	-0.530242	2.35329	3.09613	1.4418	-0.41328	-0.443891	-0.402801	-0.665529	-0.15362	-0.773399	0.390126	-0.119056	-0.381621
Leaf_Cluster_C (1155)	Seita.2G330800	-0.377135	0.125924	-0.304419	0.330859	0.802513	0.457186	-0.962226	-0.909509	-0.881549	-1.46604	-1.3561	-1.50286	1.99513	1.59643	1.0587	0.688454	0.417668	1.55272	0.767406	-0.107073	0.265251	-0.868777	-0.650324	-0.67223
Leaf_Cluster_C (1155)	Seita.2G340700	0.231472	-0.789569	-0.764568	-0.87713	-0.647628	-0.742945	-0.579606	-0.819952	-0.942615	-0.977518	-1.45483	-1.26942	1.57384	1.14596	2.48199	0.769727	0.144018	0.493543	0.203284	0.246116	-0.0320585	1.09523	0.470337	1.04232
Leaf_Cluster_C (1155)	Seita.2G343200	-0.181624	0.60441	-0.686393	-0.452518	-0.29985	-0.281155	-1.17293	-0.562938	-0.958181	-1.45906	-1.46942	-1.24332	2.45609	2.08405	1.18796	0.531858	0.436676	0.810005	-0.101111	-0.0417284	-0.139316	0.460167	0.10114	0.377194
Leaf_Cluster_C (1155)	Seita.2G343700	-0.880683	-0.680626	-1.10698	0.230497	0.275424	0.246118	-0.86799	-1.43022	-1.34573	-1.20022	-1.51046	-1.05784	1.60499	1.14829	1.69192	1.03939	0.521623	0.411772	-0.267539	0.104719	0.419594	0.910752	0.805861	0.937319
Leaf_Cluster_C (1155)	Seita.2G352000	-1.31331	-1.61271	-1.44317	-1.76765	-1.17676	-1.01866	0.36209	0.409716	-0.436434	-0.0435748	-0.43457	-0.116788	1.62401	1.49302	0.533806	-0.0801578	0.100489	0.497417	0.453247	1.09706	-0.204249	1.48095	0.891596	0.704628
Leaf_Cluster_C (1155)	Seita.2G358200	-0.151588	0.156451	-0.227338	-0.695457	-0.68843	-0.312285	-0.551118	-1.1615	-0.668203	-0.720878	-1.03333	-0.500687	1.20342	1.04678	1.58692	1.84913	1.56965	1.26269	0.069799	-0.728614	-0.481576	-1.98177	0.540044	0.617894
Leaf_Cluster_C (1155)	Seita.2G369800	-0.989469	-0.989469	-0.375929	-0.280766	-0.989469	-0.989469	0.104459	-0.617359	-0.693036	-0.0315251	-0.667217	-0.121061	1.70556	0.94217	1.13439	1.78883	-0.989469	-0.989469	-0.326028	-0.47454	-0.286446	2.10794	1.44782	0.57955
Leaf_Cluster_C (1155)	Seita.2G374700	0.264404	-0.257191	0.0859246	0.0871674	0.293716	0.496173	-0.63738	-0.630922	-1.06938	-1.283	-0.709924	-1.06944	1.89043	1.86436	1.58939	-0.88017	-1.09758	-0.519407	-0.503455	-0.5411	-0.86529	1.33688	1.22616	0.929642
Leaf_Cluster_C (1155)	Seita.2G375300	-0.801615	-0.664569	-0.85182	-0.815848	-0.566924	-0.551831	-0.658802	-0.654184	-0.822911	0.413323	-0.232106	-0.0437842	3.21474	0.845533	1.7096	1.61828	0.687665	0.0237047	-0.71578	-0.385041	-0.603601	0.0803372	-0.189027	-0.0353413
Leaf_Cluster_C (1155)	Seita.2G381500	-0.767396	-0.767396	-0.725517	-0.767396	-0.767396	-0.767396	-0.767396	-0.767396	-0.767396	-0.767396	-0.767396	-0.767396	2.50704	1.99799	1.39894	0.747212	0.82031	1.2929	-0.423375	0.125092	-0.275227	0.26842	0.718226	-0.0106569
Leaf_Cluster_C (1155)	Seita.2G384400	-0.587691	-0.537071	-0.571272	-0.614082	-0.52013	-0.616539	-0.703713	-0.703713	-0.703713	-0.703713	-0.595605	-0.703713	3.32575	2.14835	1.25549	-0.197996	-0.440487	0.355207	0.169129	0.553161	0.455526	-0.147061	0.0761836	0.00770265
Leaf_Cluster_C (1155)	Seita.2G391600	-0.779872	-0.862345	-0.798001	0.341424	0.504991	0.140266	0.332613	0.317367	0.340687	-1.12459	-1.56401	-1.0558	0.908916	0.84319	0.854046	-0.326001	-0.359397	-0.603661	-1.14097	-0.572058	-0.900553	1.63148	1.96575	1.90652
Leaf_Cluster_C (1155)	Seita.2G399600	-1.19792	-1.34096	-1.37384	-0.53278	0.285122	-0.770352	0.725799	0.312002	-0.380341	-0.725632	-0.129261	-0.255152	1.07212	0.968174	-0.00210675	-0.951706	-0.738021	-0.104005	-0.0969698	0.465012	-0.576936	2.8651	1.51199	0.970664
Leaf_Cluster_C (1155)	Seita.2G412400	-0.849957	-0.6717	-0.788355	-0.98561	-0.937008	-0.950833	-0.5582	-0.854563	-1.03239	-0.9185	-1.3411	-0.756656	1.6944	1.42748	1.91084	1.00914	1.05224	0.812469	0.113689	0.353499	0.117052	0.528507	0.937621	0.687934
Leaf_Cluster_C (1155)	Seita.2G418000	-0.0518893	-0.456172	-0.0968209	-0.015829	-0.472562	-0.665072	-0.0221469	-0.199818	-0.815771	-0.561404	-0.682495	-0.619088	2.14882	3.00469	2.30515	-0.30611	-0.554443	-0.615276	-0.438095	-0.0222886	-0.315829	-0.000488799	-0.0959725	-0.451082
Leaf_Cluster_C (1155)	Seita.2G418400	-0.941186	-0.501884	-0.847742	-0.941186	-0.687441	-0.353931	-0.839368	-0.33176	-0.941186	-0.837152	-0.941186	-0.882271	2.58149	1.54749	1.03098	2.1315	0.212217	0.714692	0.140302	0.215081	0.294815	0.1011	0.360494	-0.283865
Leaf_Cluster_C (1155)	Seita.2G436900	-1.11088	-0.532025	-0.791045	0.366615	0.163228	-0.123434	-1.01144	-0.958831	-0.944747	-1.08119	-1.47351	-0.487867	2.12294	2.64502	0.899911	0.378156	0.182704	0.711112	0.331732	0.119926	0.54341	0.508661	-0.723826	0.265386
Leaf_Cluster_C (1155)	Seita.2G437900	-0.836469	-0.898371	-0.87482	-0.937604	-0.937604	-0.937604	-0.937604	-0.937604	-0.937604	-0.937604	-0.937604	-0.937604	1.78833	1.62115	1.51841	0.969283	0.939974	1.0254	0.632678	0.563719	0.363958	0.544449	0.738785	0.341952
Leaf_Cluster_C (1155)	Seita.2G441900	-0.872071	-0.928941	-0.615605	-0.85246	-0.729608	-0.0344136	-0.507645	-0.728596	-0.795744	-0.67266	-1.12602	-1.05407	2.52662	2.14266	1.5158	-0.281223	0.16011	0.475713	1.1825	0.263112	-0.117255	0.278935	0.274844	0.49602
Leaf_Cluster_C (1155)	Seita.2G442900	-0.829171	-0.516524	-0.5249	-0.995237	-0.443498	-0.602977	-1.08809	-1.46175	-0.713376	-1.08581	-1.34135	-1.06472	1.9017	1.5351	1.40827	0.67857	0.804499	0.770706	0.363732	0.301626	0.592217	0.351148	1.01439	0.945431
Leaf_Cluster_C (1155)	Seita.3G003400	-0.563577	-0.793864	-0.653413	-0.758927	-0.641101	-0.655816	-0.295772	-0.643689	-0.594597	-0.480504	-0.457727	-0.687795	3.5402	2.08116	0.966957	0.118176	0.287628	0.273078	-0.349674	-0.199697	-0.208746	0.0469959	0.469435	0.201272
Leaf_Cluster_C (1155)	Seita.3G005100	-0.310874	-0.396796	0.341276	0.00729492	0.34848	-0.254434	0.49949	-0.0232457	-0.298412	-0.229829	-0.821632	-0.776599	1.71978	1.29275	2.4703	-0.623535	-1.09637	-0.859898	-1.00936	-1.53597	-1.19895	1.08269	0.435016	1.23882
Leaf_Cluster_C (1155)	Seita.3G015800	-1.12064	-0.486292	-0.915738	0.762667	0.0946152	0.641634	-0.845667	-0.879076	-1.10389	-0.504487	-0.689909	-0.998378	1.10878	0.424424	1.21182	2.62531	1.02357	0.0501784	-0.471213	-0.606621	-0.322518	1.82451	-0.571134	-0.251954
Leaf_Cluster_C (1155)	Seita.3G017100	-1.4877	-0.887401	-0.92553	0.198183	-0.0484095	0.248473	-0.506056	-0.317202	-0.17401	-1.22384	-1.41599	-0.995926	1.25232	1.59981	1.61965	-0.135948	-0.00457842	-0.0684806	-0.35546	-0.175189	-0.353591	1.81418	1.90143	0.441274
Leaf_Cluster_C (1155)	Seita.3G030400	0.192269	0.795799	0.232128	0.146063	-0.0976233	0.225651	-0.365136	-0.0129351	-0.196267	-1.99088	-1.78571	-1.71432	1.97942	2.14738	1.2482	-0.328061	-0.15657	0.331669	0.607685	0.179435	0.0855593	0.00174741	-0.642463	-0.883041
Leaf_Cluster_C (1155)	Seita.3G031600	-0.754725	-0.197553	-0.0218706	0.158732	0.579755	-0.561245	-0.962046	-1.06549	-1.5119	-0.0360048	-1.40695	-0.621175	1.74879	0.563461	1.66978	1.26139	0.754749	0.538415	-1.34858	0.922565	-0.224104	1.70142	-0.410834	-0.776596
Leaf_Cluster_C (1155)	Seita.3G034800	-0.778322	0.0112261	-0.67359	-0.551744	-0.778322	-0.689876	-0.623525	-0.669458	-0.778322	-0.778322	-0.778322	-0.64223	2.9324	1.53444	1.41821	1.2279	0.672002	-0.778322	-0.636522	-0.0867245	-0.187903	0.278653	0.172545	1.18413
Leaf_Cluster_C (1155)	Seita.3G041600	-0.25391	-0.367343	0.259417	-0.274898	0.0978019	-0.856265	-1.07283	-0.758452	-0.157154	-0.902635	-1.07283	-0.869706	2.42915	2.35226	1.77548	-0.548785	0.375522	0.974509	0.0455888	0.0774506	-0.676579	-0.746288	0.547073	-0.376578
Leaf_Cluster_C (1155)	Seita.3G043600	-0.0915731	-0.300676	0.100849	0.105356	-0.161597	-0.0295616	-0.921503	-0.812754	-1.33931	-1.82049	-1.63809	-1.50265	2.05589	1.82687	1.24184	0.1129	-0.0493223	-0.017791	0.0741295	0.466635	0.465234	0.944058	0.705572	0.585983
Leaf_Cluster_C (1155)	Seita.3G045000	-1.22352	-0.859232	-0.842594	-0.697267	-0.564679	-0.756811	-0.0552698	-0.597552	-1.26461	-0.816583	-1.20385	-0.802451	1.19278	1.04607	2.6942	0.264729	-0.0339414	0.700333	1.0651	0.680374	-0.199248	1.13281	0.726696	0.414516
Leaf_Cluster_C (1155)	Seita.3G047600	-1.0591	-0.11072	-0.840928	-1.02118	-0.566196	-0.600073	-0.237397	-0.354979	-0.947518	-0.380282	-0.231078	-1.15923	2.13817	1.38724	1.38243	-0.370625	-0.15737	-0.250939	-0.569954	-0.131343	-0.58996	1.90813	1.51009	1.25281
Leaf_Cluster_C (1155)	Seita.3G063000	0.261124	0.0466956	-0.845199	-0.178302	0.248044	-0.58788	-0.674997	-0.827094	-0.370744	-1.04562	-1.10573	-1.05805	2.70463	2.58081	1.26915	-0.0385278	-0.0220038	0.682195	-0.838424	-0.273571	0.0816255	-0.363682	0.0550346	0.300514
Leaf_Cluster_C (1155)	Seita.3G074700	-0.928831	-0.445406	-0.863687	-0.949892	-0.97718	-0.672035	-0.635307	-0.822727	-0.793142	-0.722595	-0.975002	-0.984371	2.60736	1.69878	1.60402	0.692279	0.440025	0.235612	-0.0771935	-0.0241757	0.498223	0.771423	0.764931	0.558889
Leaf_Cluster_C (1155)	Seita.3G077600	-0.254477	-0.910466	-1.54778	0.416263	0.265136	0.125132	-1.26496	-0.803385	-0.977911	-1.65226	-1.75271	-0.851481	1.04492	1.44428	0.6039	0.137045	0.387465	0.228284	0.324875	0.481869	0.585759	1.22563	1.30558	1.43929
Leaf_Cluster_C (1155)	Seita.3G084100	-0.480472	-0.649306	-0.120023	-0.675976	-0.576423	-0.675705	-0.914723	-0.737867	-0.79991	-0.914723	-0.818981	-0.914723	2.43976	2.32363	1.72176	0.557155	0.263451	1.35422	-0.333331	-0.162797	-0.118405	0.0444833	0.19652	-0.00761152
Leaf_Cluster_C (1155)	Seita.3G093600	-0.59967	-0.812087	-0.812087	-0.812087	-0.812087	-0.812087	-0.705971	-0.812087	-0.812087	-0.812087	-0.708847	-0.812087	1.77581	2.16526	1.87542	0.577322	0.591528	0.698221	0.46522	0.843183	1.30938	-0.0949648	-0.183119	-0.699991
Leaf_Cluster_C (1155)	Seita.3G101300	0.0207579	0.629996	0.0240357	-1.07556	-0.836547	-0.989746	-0.668248	-0.729938	-0.839917	-0.292223	-0.859726	-0.238193	2.79929	2.32458	1.31842	0.769072	0.354549	0.385388	-0.0552176	-0.323338	0.0636395	-0.275098	-0.884925	-0.621051
Leaf_Cluster_C (1155)	Seita.3G104000	-0.638252	-0.805958	-0.243744	1.02174	0.305611	0.421169	-1.08384	-0.738484	-1.00269	-1.02182	-1.39205	-1.05937	2.70217	1.80218	1.09473	0.306186	-0.0260261	0.143131	-0.26103	-0.128353	-0.76992	0.93953	0.550417	-0.115323
Leaf_Cluster_C (1155)	Seita.3G109600	-0.740815	-1.10941	-0.994123	-0.0161367	-0.0936728	-0.446683	-0.668253	-0.342809	-0.813487	-1.07816	-1.18307	-0.69956	1.94349	2.3604	0.958997	1.56037	-0.00450184	0.0664453	0.0567147	-1.0603	0.968009	0.824542	0.541773	-0.0297493
Leaf_Cluster_C (1155)	Seita.3G110300	-0.268306	-0.183922	-0.214364	-0.565086	-0.529552	-0.568546	-0.568546	-0.568546	-0.568546	-0.399063	-0.411321	-0.568546	2.94431	2.46311	2.08181	0.196623	-0.260381	0.103793	-0.568546	-0.568546	-0.568546	0.0960508	-0.323964	-0.181367
Leaf_Cluster_C (1155)	Seita.3G113500	-0.595929	-0.595929	-0.595929	-0.595929	-0.595929	-0.595929	-0.595929	-0.595929	-0.591349	-0.595929	-0.595929	-0.595929	3.5384	1.73663	0.894282	0.00311164	-0.330071	-0.32046	0.183751	-0.211521	-0.394528	0.0942957	0.823365	1.12932
Leaf_Cluster_C (1155)	Seita.3G116400	-0.60046	0.15512	-0.405208	-0.881293	-0.393665	-0.434708	-0.735236	-1.15599	-0.879459	-1.36709	-1.51256	-1.67557	2.05674	1.45686	1.27751	0.969009	0.841616	0.757436	0.727289	0.706418	0.584121	-0.0207523	0.253225	0.276643
Leaf_Cluster_C (1155)	Seita.3G124500	0.191527	0.501555	0.299392	0.0829278	0.10997	-0.201111	-0.889512	-0.841822	-1.02251	-1.07255	-1.09313	-0.963341	1.70237	2.64753	1.91285	0.858334	0.580618	0.392897	-0.726652	-0.575934	-0.784295	-0.49203	-0.163766	-0.453328
Leaf_Cluster_C (1155)	Seita.3G130700	-0.928786	0.707678	-0.295314	-0.894383	-0.636161	-0.977509	-0.00623749	-0.0499037	-0.250651	-0.452858	-0.933568	-0.49851	2.49198	1.88407	1.59864	1.49792	0.623709	0.394178	0.0343084	-0.816637	-0.868378	-0.00465576	-1.09459	-0.524336
Leaf_Cluster_C (1155)	Seita.3G132500	-0.497849	-0.227231	-0.514029	-0.428132	-0.353024	-0.358393	-0.752889	-0.14862	-0.636399	-1.10237	-0.242685	-0.627305	2.40668	2.57883	1.62944	-0.941723	-1.13645	-0.479109	0.162014	-0.476992	-0.00167834	0.584953	0.693329	0.869635
Leaf_Cluster_C (1155)	Seita.3G132800	-0.978161	-0.795575	-0.679184	0.474089	0.520243	0.0349753	-0.752963	-0.26081	-0.858831	-1.43203	-1.42709	-1.05871	2.19846	2.35515	1.22235	0.071424	-0.0408515	0.337062	-0.174003	-0.616999	-0.172004	0.843316	0.687784	0.502362
Leaf_Cluster_C (1155)	Seita.3G136400	-0.155159	-0.242426	-0.692463	-0.955699	-0.888516	-0.812083	-0.968048	-1.02028	-1.05319	-1.39017	-1.39638	-1.02353	1.77739	1.47651	1.3853	1.16767	1.02475	1.03563	0.509419	0.374182	0.36999	0.670424	0.438009	0.36867
Leaf_Cluster_C (1155)	Seita.3G136500	-0.431188	-1.34829	-1.29642	-0.469396	-0.181285	0.200628	-0.438328	-0.557748	-1.40936	-1.20551	-1.26749	-0.62858	1.76051	0.724958	1.53391	0.735825	0.864958	-0.405551	-0.0344138	0.644331	-0.031592	2.11529	0.808784	0.315951
Leaf_Cluster_C (1155)	Seita.3G137100	-0.647339	-0.202137	-0.442371	-1.0359	-1.0656	-0.778309	-0.714828	-0.925249	-1.0631	-1.04463	-1.13228	-0.60941	1.80033	1.80054	1.63592	1.16811	1.32762	0.369254	-0.383754	0.55993	-0.215738	0.974069	0.639518	-0.0146386
Leaf_Cluster_C (1155)	Seita.3G138200	-0.485255	-0.173168	-0.593075	-0.170926	0.192603	0.077937	-0.49825	-0.723284	-0.459914	-0.459137	-1.22926	-0.965055	3.14021	2.55242	1.14102	-0.0206729	-0.0966013	0.0647497	-0.765872	0.0251994	-0.566323	0.0889541	0.140529	-0.216839
Leaf_Cluster_C (1155)	Seita.3G142400	-0.984385	-0.391205	-0.842477	-0.383603	-0.695248	-0.572367	-0.843851	-0.871581	-0.884929	-1.4058	-1.45826	-0.91563	1.8933	1.82017	1.29898	1.28363	1.06174	0.999942	0.299363	0.324915	0.335941	0.494846	0.273199	0.163306
Leaf_Cluster_C (1155)	Seita.3G144600	-1.09425	-0.885863	-1.7921	0.725895	0.692703	0.477742	0.10374	0.309283	0.641749	-0.677591	-0.616576	-0.976862	1.40723	1.58409	0.489886	-0.270157	-0.00836885	-0.331321	-1.36281	-1.19386	-1.0519	1.06097	1.37233	1.39606
Leaf_Cluster_C (1155)	Seita.3G145000	-0.259695	-0.237909	0.218641	-0.6872	-0.18352	-0.418255	-1.15824	-1.03299	-1.0977	-0.82433	-1.31838	-0.890785	1.2241	1.58367	2.69936	0.652884	0.527593	0.625073	-0.46417	-0.188138	-0.413818	1.44831	-0.346921	0.542418
Leaf_Cluster_C (1155)	Seita.3G150400	0.243144	0.0410579	-0.421273	-0.104819	0.0414433	-0.222629	-1.66137	-1.61649	-1.5392	-0.54483	-0.788753	-0.834187	2.4648	2.24209	0.970776	0.41626	0.254173	0.544199	0.393042	0.150252	0.609539	-0.287014	-0.363965	0.0137391
Leaf_Cluster_C (1155)	Seita.3G156000	-0.279162	0.371866	-0.608582	-0.927067	-0.927067	-0.639584	-0.69033	-0.770693	-0.524545	-0.927067	-0.927067	-0.927067	2.71184	2.16196	1.45353	0.826836	1.01247	-0.149802	-0.0610038	0.538253	0.011229	-0.179918	-0.194899	-0.354128
Leaf_Cluster_C (1155)	Seita.3G157100	-0.75966	0.0395875	-0.709133	-0.641937	-0.81881	-0.268388	-0.9285	-0.775071	-1.16471	-0.245331	-1.16471	-0.472728	1.27125	0.21905	1.84887	0.680709	0.0576279	0.457719	-0.0778997	0.144272	-0.287088	3.20492	-0.0158054	0.405762
Leaf_Cluster_C (1155)	Seita.3G157400	-0.555923	-0.312088	-0.797502	-0.492181	-0.630417	-0.649018	-0.872463	-0.906841	-1.24747	-1.11	-1.15797	-1.41456	2.15317	1.87333	1.37709	0.774062	0.801057	0.696605	0.199737	0.0602253	0.269161	0.803754	0.619819	0.518411
Leaf_Cluster_C (1155)	Seita.3G157500	-0.279704	-0.154361	-0.786511	-0.192591	-0.185919	-0.351318	-0.700137	-0.664844	-0.980869	-1.79753	-1.32079	-1.92963	2.16642	1.84532	1.13056	0.398476	0.348961	0.461329	0.648538	0.376693	0.662186	0.619849	0.356158	0.329723
Leaf_Cluster_C (1155)	Seita.3G161500	-0.537894	0.216963	-0.708817	-0.378724	-0.487034	0.102362	-0.0970618	0.0123476	-0.921653	-0.484325	-1.26114	-0.778179	1.19889	1.45526	1.05588	-1.13711	-1.18655	-0.419416	-0.455672	0.469544	-0.956131	2.14408	1.67505	1.47932
Leaf_Cluster_C (1155)	Seita.3G162400	-0.686713	-0.686713	-0.61306	-0.686713	-0.686713	-0.686713	-0.449948	-0.514029	-0.39056	-0.644989	-0.606103	-0.686713	3.23913	2.24851	1.26007	0.613727	0.172221	0.54132	0.359086	-0.266406	-0.276009	-0.397154	0.158131	-0.313665
Leaf_Cluster_C (1155)	Seita.3G175700	-0.00638403	-0.00952685	0.538446	-1.759	-1.62839	-1.50759	-0.474942	-0.277829	-0.142037	-0.581284	-0.7372	-0.616682	0.921069	1.11083	1.29015	-0.947597	-0.884232	-0.778245	1.11706	1.09021	1.16073	0.880051	1.08827	1.15411
Leaf_Cluster_C (1155)	Seita.3G178400	-0.713045	0.323478	-0.526559	-0.398818	0.0133434	0.132429	-0.446569	-1.04931	-0.376937	0.436849	-1.09195	-1.10808	3.02958	2.34931	1.19814	-0.151946	-0.46009	0.128373	0.438304	-0.177453	-1.07026	-0.0198295	-0.329715	-0.12926
Leaf_Cluster_C (1155)	Seita.3G190500	-0.567655	-0.567655	-0.567655	-0.34182	-0.445858	-0.341582	-0.567655	-0.545573	-0.567655	-0.567655	-0.567655	-0.456461	3.26152	2.37077	1.48702	0.460868	-0.12092	0.593317	-0.101602	-0.405514	-0.35775	-0.259445	-0.25574	-0.567655
Leaf_Cluster_C (1155)	Seita.3G204700	0.402274	0.376559	-0.06548	1.17279	0.786532	1.0566	-1.0583	-1.0583	-1.01555	-0.731828	-0.74849	-0.77445	1.19076	1.36743	1.51432	1.17306	1.06673	1.0062	-1.0583	-1.0583	-1.0583	-0.587501	-0.956138	-0.94235
Leaf_Cluster_C (1155)	Seita.3G207800	-0.977271	-1.07344	-0.902452	-0.543077	-0.571646	-0.0903834	-0.779999	-0.552965	-1.0732	-0.82184	-0.808079	-1.1239	2.43112	0.768763	1.50961	-0.285774	0.132474	0.485816	0.476121	0.169634	-0.229453	1.78918	0.930329	1.14042
Leaf_Cluster_C (1155)	Seita.3G223900	0.154144	-0.861693	-0.163303	-0.836186	-0.00892817	-0.471458	-1.29474	-1.16707	-0.942871	-0.963647	-1.14561	-0.902673	2.80574	0.649965	1.44298	0.36455	0.924511	0.929649	-0.253495	-0.15863	-0.132608	0.0894826	1.16206	0.779824
Leaf_Cluster_C (1155)	Seita.3G225500	-0.747898	-0.186572	-0.747898	-0.747898	-0.565977	-0.747898	-0.747898	-0.747898	-0.747898	-0.747898	-0.747898	-0.677585	2.3412	2.16313	1.44831	1.15076	1.36149	0.93237	-0.183819	-0.319627	-0.747898	-0.023587	0.293107	-0.25422
Leaf_Cluster_C (1155)	Seita.3G227300	-0.408984	0.20492	-0.411452	0.0833427	-0.00188758	-0.0675474	-1.31517	-1.22711	-1.09521	-1.15999	-1.44976	-1.05975	2.20169	1.77071	0.934803	1.20507	0.982457	1.23486	-0.534148	-0.365207	-0.248131	0.555228	0.119671	0.0515836
Leaf_Cluster_C (1155)	Seita.3G241100	-1.05254	-0.592624	-0.848604	-0.384166	-0.79752	-0.965495	-1.03554	-0.392253	-0.783254	-1.07832	-0.926041	-0.815778	0.811536	2.46402	0.921957	0.450543	0.674704	-0.14669	0.256436	1.58588	-0.24002	0.339832	1.66722	0.886716
Leaf_Cluster_C (1155)	Seita.3G243700	-0.881726	-0.562631	-0.630885	-1.15795	-0.91248	-0.919397	-0.723927	-0.79509	-1.13726	-0.137736	-1.14751	-0.588661	2.00788	1.53481	1.22269	1.32785	1.45162	0.975567	0.520955	0.570145	0.883478	-0.354924	-0.300796	-0.244026
Leaf_Cluster_C (1155)	Seita.3G264300	-0.797869	-0.306565	-0.690269	-0.66097	-0.843272	-0.843272	-1.03325	-1.14965	-0.704502	-1.22072	-1.25056	-1.02653	1.79243	1.81348	1.20741	1.27346	1.00492	1.06864	0.503254	0.442132	0.757319	0.347459	0.0739513	0.242971
Leaf_Cluster_C (1155)	Seita.3G269000	-0.402955	-0.584805	-0.512717	-0.358878	-0.700511	-0.34734	-0.703703	-0.769244	-0.870453	-0.964206	-0.729974	-0.964206	0.967518	1.52582	2.38558	1.95371	1.36355	1.14135	0.197275	0.156333	-0.288235	0.0355954	-0.810259	-0.719256
Leaf_Cluster_C (1155)	Seita.3G275400	-0.553709	-0.788974	-0.92776	-0.991569	-0.800946	-0.832019	-0.309829	-0.544328	-0.998321	-0.697141	-0.832729	-0.89469	1.9039	1.68179	0.819598	0.375699	0.386597	1.87628	1.46944	1.27362	0.132055	0.369802	-0.43741	-0.67934
Leaf_Cluster_C (1155)	Seita.3G292400	-1.60532	-0.565749	-0.916497	-0.848508	-0.563504	0.191005	-1.02059	-0.957482	-1.29247	0.124374	-0.873093	-0.301101	1.15577	1.47009	1.56381	-0.0182144	0.22437	0.516204	-0.223397	-0.594019	-0.00799321	1.38945	1.82976	1.32309
Leaf_Cluster_C (1155)	Seita.3G311700	-0.822084	-0.756943	-0.913836	-0.623946	-0.518784	-0.0822145	-0.799293	-0.835455	-1.14346	-0.932929	-1.1562	-0.746554	1.25532	1.32426	1.18244	1.66169	0.909103	0.119677	-0.867711	0.0954959	-0.00630239	1.88079	0.325365	1.45159
Leaf_Cluster_C (1155)	Seita.3G328100	-0.706281	-0.611348	-0.71831	-0.371246	-0.554973	-0.402168	-0.706644	-0.646369	-0.819208	-0.56747	-0.819208	-0.819208	3.03388	1.86925	1.53885	1.12263	0.808575	0.530654	-0.249718	-0.12093	-0.465932	0.0971415	-0.430802	0.00883542
Leaf_Cluster_C (1155)	Seita.3G328300	-0.243524	0.54668	-0.604318	-0.740932	-0.206544	-0.4168	-0.76593	-0.338788	-0.634645	-0.860562	-0.674301	-0.860562	2.95204	2.62008	1.24976	0.198537	0.429705	0.0660773	-0.478731	-0.329059	-0.756673	0.288217	-0.296785	-0.142935
Leaf_Cluster_C (1155)	Seita.3G330000	0.34674	0.0846181	-0.301034	0.0629937	0.0796369	-1.41748	-1.41748	-0.498944	-0.816631	-1.1373	-1.41748	-0.935247	2.52506	2.06521	1.17558	0.969874	0.106478	0.550435	-0.0896807	-0.021568	0.204267	0.4266	-0.245572	-0.299059
Leaf_Cluster_C (1155)	Seita.3G330400	-0.382755	-0.389298	-0.248129	-0.182422	-0.21949	0.347089	-0.199197	-0.542085	-0.147017	-1.28573	-1.28573	-1.28573	0.886635	1.93686	1.69276	0.929777	1.12029	1.18189	0.667255	0.672412	0.589818	-1.28573	-1.28573	-1.28573
Leaf_Cluster_C (1155)	Seita.3G343500	-0.596589	-0.704128	-1.05563	-0.247044	-0.248539	-0.485005	-0.826425	-0.889384	-1.26443	-0.892412	-1.45943	-0.787939	1.68759	1.71034	0.765373	1.4469	1.69797	1.4646	0.377109	0.373163	0.438805	-0.127042	-0.106081	-0.271766
Leaf_Cluster_C (1155)	Seita.3G347600	0.222229	0.750951	-0.0590834	0.712688	0.461943	0.0184252	-0.818126	-0.645407	-0.926689	-0.767217	-0.823416	-0.926689	2.71896	2.52741	1.16107	0.0151494	-0.0506831	0.141874	-0.599863	-0.662874	-0.926689	-0.441136	-0.565039	-0.517789
Leaf_Cluster_C (1155)	Seita.3G356500	0.555503	0.435055	0.155341	-1.39918	-1.39918	-1.39918	-0.066179	-0.421531	-0.173437	-0.384399	-0.344805	-0.306579	1.65537	1.53105	1.22121	-1.39918	-1.39918	-1.39918	0.777235	0.680618	0.562837	0.684049	1.07486	0.758875
Leaf_Cluster_C (1155)	Seita.3G357600	-1.11217	-0.657784	-0.558801	-0.321369	-0.0565811	0.21681	-1.11009	-0.926252	-0.834423	-1.12922	-1.13371	-0.0823716	2.07687	2.72839	0.862565	0.238408	0.989308	0.0694655	-0.326897	-0.276308	-0.624119	0.901715	0.448359	0.6182
Leaf_Cluster_C (1155)	Seita.3G382700	-0.745803	-1.53902	-1.41503	1.43269	1.05329	1.26706	-0.634074	-0.791037	-0.601256	-0.998871	-1.00277	-0.937475	0.986919	1.317	0.400341	0.94596	0.749973	0.844235	-0.62484	-0.896416	-1.05639	0.69979	0.751656	0.794063
Leaf_Cluster_C (1155)	Seita.3G385200	-0.190008	-0.194287	-0.474998	-0.448406	-0.236771	-0.960904	-0.922483	-0.722942	-0.652767	-0.821415	-0.838819	-0.969974	3.11992	2.05785	1.56808	0.45071	0.511829	0.117606	0.259343	-0.139469	0.160207	-0.421703	0.168858	-0.41946
Leaf_Cluster_C (1155)	Seita.3G391000	-0.639802	-1.02411	-0.580869	-0.82345	-1.04104	-0.814075	-1.02341	-1.31718	-1.29188	-0.740272	-0.755303	-0.329243	1.99666	1.74651	1.19799	0.403518	0.580463	0.567946	0.0291918	0.41757	0.167258	1.21389	1.0989	0.96074
Leaf_Cluster_C (1155)	Seita.3G396400	-0.125641	0.00868958	0.140241	-0.939225	-0.920495	-0.745314	-0.493026	-0.290079	-0.538218	-0.952977	-0.95459	-1.0236	1.50897	1.13083	1.48775	1.79163	2.06766	1.59084	-0.338116	-0.465613	-0.434	-0.264421	-0.461651	-0.77965
Leaf_Cluster_C (1155)	Seita.3G403800	-0.0181192	0.547711	0.517996	-0.441136	-0.171748	-0.16543	-0.963365	-0.438058	-0.651084	-1.27974	-1.34401	-1.30626	2.70225	2.30038	1.44917	-0.236738	-0.222932	0.167297	-0.419236	0.0887577	-0.334328	0.493988	0.0629111	-0.338276
Leaf_Cluster_C (1155)	Seita.3G404200	-0.517112	-0.382472	-0.207593	-0.704116	-0.818386	-1.00669	-1.52692	-1.39727	-1.56983	-0.376338	-0.658151	-0.101199	1.57994	1.21906	1.46943	0.505242	0.295448	0.271877	0.0583129	-0.292169	-0.137431	1.77841	1.38646	1.13149
Leaf_Cluster_C (1155)	Seita.3G404400	-0.367446	-0.283626	-0.54595	-0.000886265	0.13254	-0.212588	-0.850942	-1.20477	-1.74761	-1.20003	-1.30975	-0.973081	2.32244	1.72975	1.53432	0.389972	0.128445	-0.236243	-0.21657	0.496834	0.205568	1.06673	0.58336	0.559541
Leaf_Cluster_C (1155)	Seita.3G405600	-0.401325	-0.493122	-0.591283	-0.591283	-0.591283	-0.591283	-0.591283	-0.591283	-0.591283	-0.533147	-0.591283	-0.591283	1.07903	1.32733	1.94297	1.49526	2.21064	1.89535	-0.567074	-0.367073	-0.493447	-0.591283	-0.591283	-0.591283
Leaf_Cluster_C (1155)	Seita.3G408500	0.510629	-0.537442	-0.847341	-0.788304	-0.847341	-0.841027	-0.847341	-0.847341	-0.195903	-0.42615	-0.586115	-0.847341	1.33019	0.878488	1.83548	-0.442693	0.420307	1.3576	-0.847341	-0.333522	-0.799797	1.82668	2.00499	-0.129365
Leaf_Cluster_C (1155)	Seita.4G011200	-0.551917	-0.454653	-0.780953	0.15141	-0.407589	-0.0805532	-1.07936	-0.69937	-1.07936	-1.07936	-0.896366	-1.07936	1.16664	3.04777	1.7976	0.45473	0.998924	0.186449	0.451345	0.481681	0.0978541	-0.0843804	-0.284288	-0.27691
Leaf_Cluster_C (1155)	Seita.4G021700	0.0841144	-0.813524	0.119296	-0.672211	-0.111265	0.213977	-0.180125	0.000361016	-0.711849	-1.71465	-1.20963	-0.901042	2.05828	1.71601	1.21198	-0.510667	-0.577258	0.586345	0.571962	0.823197	-0.416281	1.38158	0.735635	-1.68424
Leaf_Cluster_C (1155)	Seita.4G022900	0.237003	-0.503421	0.0571075	-1.59989	-1.04753	-0.143879	0.42312	0.398726	0.206893	0.195694	-0.484494	-1.7197	2.20486	1.26215	1.49308	-1.07371	-1.31793	-0.858875	0.859498	0.0282461	-0.183843	1.48803	0.258973	-0.180099
Leaf_Cluster_C (1155)	Seita.4G023300	-0.592259	-0.818074	-1.20155	-0.350812	-0.486497	-0.441629	-0.782819	-0.821667	-0.872382	-1.27716	-1.4497	-1.20981	1.85478	1.50225	0.871413	0.475984	0.574147	0.343968	-0.00799888	0.421954	0.293909	1.54512	1.17121	1.25762
Leaf_Cluster_C (1155)	Seita.4G024000	-0.557074	-0.696229	-0.682135	-0.589922	-0.46362	-0.709606	-0.876476	-0.803545	-0.776383	-1.44814	-1.31674	-1.39146	1.62205	1.6355	1.32077	1.32303	1.21749	1.19184	0.575482	0.650835	0.607976	0.168663	-0.129675	0.127386
Leaf_Cluster_C (1155)	Seita.4G033500	0.209257	0.428392	-0.0141058	-0.953418	-0.702675	-0.700271	-0.953418	-0.508478	-0.221455	-0.572755	-0.724403	-0.536615	3.10978	1.42321	2.41334	-0.30843	-0.576351	-0.629499	-0.0918175	-0.097084	-0.158034	0.314908	0.0360346	-0.18611
Leaf_Cluster_C (1155)	Seita.4G043100	-0.97441	-0.387298	-0.691698	-1.14434	-1.20425	-1.00747	-0.289649	-0.493638	-0.436206	-0.207505	-0.820433	0.276479	1.68817	1.55155	0.901744	1.38362	2.10222	1.38651	0.106145	0.470483	0.0262072	-0.514661	-0.983822	-0.737751
Leaf_Cluster_C (1155)	Seita.4G045800	-0.741564	-0.627888	-0.78217	-0.275363	-0.88662	-0.277729	-1.12769	-0.701695	-1.12755	-1.13007	-1.53411	0.271839	1.80853	1.9765	1.00934	0.552071	0.921775	0.894091	-0.785626	-0.18632	-0.134281	1.0996	1.15993	0.62501
Leaf_Cluster_C (1155)	Seita.4G048300	-0.640107	-0.452465	-0.481934	-1.02818	-0.834141	-0.661328	-0.915849	-0.621045	-0.684855	-0.848847	-0.906145	-1.13575	1.32126	2.73259	1.30271	0.309487	0.440419	1.02286	0.524959	1.46325	0.213227	0.503992	0.0629068	-0.687013
Leaf_Cluster_C (1155)	Seita.4G060600	-0.649077	-0.35146	-0.505513	-0.409136	-0.0933513	-0.175186	-0.482156	-0.618856	-0.66103	-0.710485	-0.710485	-0.710485	2.24391	1.31645	1.52868	1.6801	1.39552	1.75478	-0.671873	-0.606123	-0.577166	-0.638496	-0.710485	-0.638083
Leaf_Cluster_C (1155)	Seita.4G063900	-0.521853	-0.410984	-0.114569	-0.334046	-0.799403	-0.136003	-0.495305	-1.06183	-0.620848	-1.25386	-1.34171	-0.413563	3.06881	0.99821	2.03549	0.493908	0.191239	0.0362609	-0.65922	0.124713	-0.279391	0.676503	0.011331	0.806118
Leaf_Cluster_C (1155)	Seita.4G078600	0.135678	0.506062	-0.174631	0.394801	0.191121	0.239255	-1.1535	-1.1535	-1.13055	-0.807127	-0.909826	-0.685379	2.63367	0.989442	0.94253	1.09869	1.02959	1.10473	-1.1535	-1.1535	-1.1535	-0.234168	-0.0242424	0.467833
Leaf_Cluster_C (1155)	Seita.4G079000	-0.951517	0.0527826	-1.09081	-1.02092	-0.267155	-0.274492	-0.707844	-0.789135	-1.22543	-0.510732	-1.60804	-0.796074	1.90813	1.42594	1.7724	1.06158	0.199511	-0.00656985	0.482139	0.339091	-0.250466	1.75753	0.266839	0.233236
Leaf_Cluster_C (1155)	Seita.4G079200	-0.399953	0.24752	-0.78799	-0.798781	-0.881756	-0.192214	-0.933272	-0.676615	-1.49271	-0.857301	-0.969583	-1.00479	1.9238	1.99301	0.943299	-0.428405	-0.450261	0.561028	0.824633	0.773405	-0.173843	1.76092	0.877681	0.142176
Leaf_Cluster_C (1155)	Seita.4G096400	-0.444293	-0.929231	-0.719995	-0.805461	-0.828092	0.781651	-1.13829	-0.890743	-0.642848	-1.34339	-1.17516	-1.38009	1.53853	1.19804	1.03089	0.516372	0.493955	0.800995	0.304858	1.27285	-0.435383	1.75644	0.930523	0.107889
Leaf_Cluster_C (1155)	Seita.4G099400	-1.26559	-0.733485	-0.926519	-0.587686	-0.778508	-0.502672	-0.756694	-0.914433	-0.444388	-0.921449	-1.32925	-1.05726	2.12208	1.37244	1.74033	0.944565	1.19909	0.89295	0.370832	0.525331	0.269452	0.54747	-0.108752	0.342148
Leaf_Cluster_C (1155)	Seita.4G101200	-2.72827	-0.77002	-2.71583	0.285934	0.248443	-0.103252	0.49667	0.256511	0.71144	0.666413	0.164139	0.146739	1.53226	1.41458	-0.199719	0.401577	0.975693	0.327707	-0.62268	-0.292526	0.0761483	-0.164996	-0.0769595	-0.0300007
Leaf_Cluster_C (1155)	Seita.4G104100	-1.02387	0.248254	-0.772989	-0.395008	-0.438187	-0.393337	-0.487118	-0.376652	-0.891489	-1.02387	-0.814797	-0.712024	2.78828	2.52222	0.916911	-0.0807177	0.526164	1.13362	0.112818	0.103132	-0.0502415	-0.0422366	0.0569778	-0.905825
Leaf_Cluster_C (1155)	Seita.4G108300	-0.4417	0.101398	-0.250978	-0.403565	-0.453102	-0.465829	-1.19568	-1.4389	-1.12291	-1.01042	-0.922015	-0.967595	2.1897	2.04463	1.27634	0.955337	1.05712	1.00473	-0.299443	-0.401231	-0.447183	0.3183	0.412452	0.460547
Leaf_Cluster_C (1155)	Seita.4G114600	-0.962319	-0.854997	-0.64118	-0.922193	-0.970567	-0.896366	-0.919224	-1.11447	-0.905175	-0.923164	-1.18026	-0.808188	1.71244	1.65561	1.30007	0.865993	1.18767	0.962869	0.492041	0.465125	0.369888	0.800821	0.734783	0.550797
Leaf_Cluster_C (1155)	Seita.4G116300	-0.923957	-0.928668	-0.850469	-0.928668	-0.699465	-0.928668	-0.658679	-0.727761	-0.928668	-0.831684	-0.928668	-0.928668	1.03429	1.94166	2.04588	0.394927	0.481745	0.858285	-0.279309	1.12465	1.4291	0.234032	0.412174	0.5866
Leaf_Cluster_C (1155)	Seita.4G119400	-0.904428	-0.760664	-0.782179	-0.978259	-0.687999	-0.756985	-0.964635	-1.15899	-0.800098	-0.865075	-0.808448	-1.14864	1.54286	1.72549	1.11118	0.996665	0.968044	1.2003	0.325504	-0.599219	0.882849	0.540105	0.911587	1.01103
Leaf_Cluster_C (1155)	Seita.4G120200	-0.746302	-0.0957847	-0.374038	-1.17348	-0.994187	-1.10438	-0.471829	-0.696558	-0.813474	-0.455753	-0.64758	-0.733088	3.00228	1.63546	1.54888	0.387336	0.597283	-0.229453	0.658464	0.49958	0.682051	0.289521	-0.342556	-0.422386
Leaf_Cluster_C (1155)	Seita.4G122500	-1.19635	0.229466	-0.745642	0.304497	-0.181069	-0.323973	-0.218048	-0.381038	-1.1204	-0.84706	-0.908235	-0.243016	1.85058	2.37544	1.10356	-0.720187	-0.926907	0.381637	-0.792732	-0.422	-0.754896	0.862195	1.63385	1.04034
Leaf_Cluster_C (1155)	Seita.4G140300	-0.223713	0.0735311	-0.587712	-0.90488	-0.90488	-0.90488	-0.90488	-0.90488	-0.90488	-0.90488	-0.845643	-0.90488	2.6298	2.37859	1.32043	0.446652	0.409534	0.611318	-0.0927439	0.29069	0.192003	0.140825	0.209042	0.286432
Leaf_Cluster_C (1155)	Seita.4G143700	-0.739565	-0.739565	-0.739565	-0.739565	-0.739565	-0.739565	-0.739565	-0.739565	-0.739565	-0.739565	-0.739565	-0.739565	2.90396	2.21313	0.642559	0.783048	0.855185	0.991038	-0.27126	0.373675	0.219367	0.0618689	0.269805	-0.167597
Leaf_Cluster_C (1155)	Seita.4G149400	-0.152985	-0.137165	-0.189728	-0.594771	-0.550891	-0.594771	-0.542969	-0.545575	-0.531149	-0.594771	-0.594771	-0.374816	3.63448	2.05387	1.2274	-0.0529067	0.675848	-0.289346	-0.283327	-0.501932	-0.369541	-0.32843	0.00416629	-0.365928
Leaf_Cluster_C (1155)	Seita.4G151800	-0.331399	-1.73258	-0.674944	-0.302186	0.00261761	0.189407	-0.90728	-0.840788	-1.18747	-1.11516	-1.31189	-1.21184	1.50432	1.36858	1.30954	-0.170929	-0.15197	-0.0247549	0.467226	0.659539	0.57772	1.38359	1.26595	1.23468
Leaf_Cluster_C (1155)	Seita.4G157000	-0.196944	-1.11593	-1.11859	0.130561	0.518543	-0.368821	-1.09906	-1.18739	-1.41386	-0.964915	-1.46848	-0.752366	1.91688	1.40541	1.32375	0.194878	-0.240049	0.216071	0.127403	1.13109	0.934852	0.251302	1.3455	0.430165
Leaf_Cluster_C (1155)	Seita.4G160500	-1.04449	-1.2421	-1.60478	-0.225896	-1.09997	-0.84441	-0.405176	-0.466498	-0.696806	-0.340312	-0.75383	-0.881137	1.76793	2.56448	0.267992	0.268802	0.203186	0.494442	0.173366	0.555592	1.17322	0.448228	0.754306	0.933872
Leaf_Cluster_C (1155)	Seita.4G167900	-0.10887	-1.46584	-1.00053	-0.0912954	0.585108	-0.014992	-0.943015	-1.10074	-0.515199	-0.0288215	-1.34058	-1.05342	1.35896	0.99154	0.736927	1.85981	1.39867	1.99697	-0.448919	-0.880332	-0.181201	0.5914	-0.0763081	-0.269324
Leaf_Cluster_C (1155)	Seita.4G168200	-2.54266	-2.0616	-2.27716	0.511209	0.357588	0.341079	0.241599	-0.193838	0.341873	0.0862621	-0.0876499	-0.757848	1.35172	0.827	1.05274	0.128286	0.538509	0.232166	-0.223219	0.0475201	-0.121672	0.530992	0.670433	1.00667
Leaf_Cluster_C (1155)	Seita.4G175900	-0.804004	-0.36904	-0.717754	0.252818	0.200949	0.583886	-0.535742	-0.480595	-0.950647	-0.722688	-0.846831	-1.1628	3.31167	1.48518	1.36981	0.142264	0.149322	0.424132	-1.03185	-0.527906	-0.568257	0.511647	0.181636	0.104798
Leaf_Cluster_C (1155)	Seita.4G178500	-0.552618	-0.584482	-0.584482	-0.584482	-0.584482	-0.545983	-0.584482	-0.556035	-0.584482	-0.584482	-0.584482	-0.584482	3.04146	2.1849	1.31135	0.598486	0.698519	1.23041	-0.442045	-0.452837	-0.471754	-0.117831	-0.174099	-0.491578
Leaf_Cluster_C (1155)	Seita.4G181300	-0.272296	0.434527	-0.503008	-0.332787	-0.601825	-0.800286	-0.848077	-0.931533	-0.956855	-1.14561	-1.51613	-1.20724	2.3117	2.13545	1.08994	0.560694	0.623118	0.699148	0.555021	0.683903	0.727543	-0.187285	-0.403379	-0.114749
Leaf_Cluster_C (1155)	Seita.4G185100	-0.53673	-0.128892	-0.293123	-0.358663	-0.570516	-0.712625	-0.789512	-1.05702	-1.1824	-1.06882	-1.03095	-1.09007	2.21102	2.20099	0.91599	-0.486312	-0.757662	0.294752	0.845002	0.677583	0.248445	0.991354	0.939173	0.738996
Leaf_Cluster_C (1155)	Seita.4G191200	-0.704147	-0.334275	-1.12292	-0.527354	-0.741667	-0.601222	-0.957641	-1.1465	-1.16389	-1.25976	-1.25197	-1.20137	1.62696	1.29564	1.01389	0.767701	0.520408	0.702944	0.680722	0.476934	0.384648	1.27255	1.22069	1.04962
Leaf_Cluster_C (1155)	Seita.4G193700	0.225624	0.624586	-0.331815	-1.1774	-1.42532	-1.39961	-0.963485	-1.1989	-1.42193	-0.239031	-1.48745	-0.324563	1.41857	1.69943	1.79664	0.745483	0.424295	0.489509	0.410072	0.53219	0.401468	0.387658	0.170548	0.643442
Leaf_Cluster_C (1155)	Seita.4G195600	-0.678453	-0.732936	-0.974514	-0.383513	-0.359567	-0.271835	-1.106	-1.04275	-1.36265	-0.885577	-1.17743	-0.671835	2.27659	1.58101	1.00892	1.19703	1.0085	0.982597	-0.215712	-0.109255	-0.298762	0.823423	0.665868	0.72686
Leaf_Cluster_C (1155)	Seita.4G196000	-1.02768	-0.5565	-1.07318	-0.956878	-0.824278	-0.946605	-0.707802	-0.761825	-0.921803	-0.939106	-0.927112	-0.63012	1.77291	1.54011	0.927202	1.13307	1.38279	1.22233	0.569286	0.609076	-0.880289	0.596248	0.860052	0.540114
Leaf_Cluster_C (1155)	Seita.4G197600	-0.272872	-0.614762	-0.647375	-0.0593618	-0.015424	0.356169	-0.671651	-0.738545	-1.44046	-0.60651	-0.977127	-1.03377	2.06115	1.41148	0.905059	0.365866	0.682926	0.551197	0.714389	1.07778	-2.44437	0.174412	0.882546	0.339245
Leaf_Cluster_C (1155)	Seita.4G203600	-0.18152	-0.175616	-1.06431	-0.0976299	-0.84902	-0.10061	-0.731546	-0.986577	-0.549758	-0.889371	-1.06431	-1.06431	2.54398	1.96633	1.65223	0.846967	-0.173316	0.614365	-0.76015	-0.225882	-0.264043	-0.0585294	0.790229	0.822407
Leaf_Cluster_C (1155)	Seita.4G207600	-0.752822	-1.10185	-2.11694	0.0927351	0.846767	-0.311912	-0.41481	-0.654793	-1.12475	-0.14379	-0.37968	0.0485392	2.62102	1.34655	-0.0145718	0.744039	0.484448	0.828927	-0.909565	-0.612556	-0.72353	0.439094	0.615442	1.19401
Leaf_Cluster_C (1155)	Seita.4G209800	-0.880831	0.312026	-0.381933	-0.494484	-0.484047	-0.404055	-0.486004	-0.662394	-0.608587	-0.919125	-0.924321	-1.33694	2.44194	2.23122	1.61011	-0.685363	-0.675824	-0.435641	0.0149054	0.0151058	0.271888	0.795391	0.959391	0.727568
Leaf_Cluster_C (1155)	Seita.4G209900	0.29885	-0.822885	-0.880505	-0.705398	0.052845	0.0361391	-0.909947	-0.618609	-0.581488	-0.981295	-1.12551	-1.13641	2.2442	2.62193	1.06743	0.099123	0.212229	0.477154	-0.743004	-0.356856	-0.236363	0.116826	0.772285	1.09927
Leaf_Cluster_C (1155)	Seita.4G210300	-0.498377	-0.693911	-0.427609	-0.764198	-0.494255	-0.547453	-0.623181	-0.910908	-0.699246	-1.47088	-1.56317	-1.79063	1.5782	1.53548	1.31744	0.570168	0.468015	0.655013	0.454006	0.305034	0.446418	1.26206	0.928921	0.963067
Leaf_Cluster_C (1155)	Seita.4G216400	-0.0950323	-0.750792	0.00812634	-0.396725	-0.646888	-0.773883	-0.423521	-0.823568	-1.0008	-0.651293	-0.142401	-0.722162	2.95688	1.89215	2.09129	-0.743915	-0.580278	0.291024	0.661265	-0.405178	0.0263261	0.357336	0.0296542	-0.15762
Leaf_Cluster_C (1155)	Seita.4G224700	-1.24222	-0.534597	-0.736728	-0.694892	-0.77366	-0.305077	-0.906329	-1.13494	0.13651	-0.949089	-1.02182	-1.04079	1.77013	0.680999	1.74267	0.696222	0.438575	-0.140644	0.559801	-0.0201755	-0.15976	2.07674	1.52086	0.0382117
Leaf_Cluster_C (1155)	Seita.4G226200	-0.938928	-0.649889	-0.508549	-0.873187	-0.556266	-0.70128	-0.685686	-0.836565	-0.828174	-1.13681	-1.49775	-1.08313	1.79152	1.47668	1.58749	1.03734	1.06375	0.988956	1.18679	0.704748	0.427412	0.205744	-0.271369	0.0971454
Leaf_Cluster_C (1155)	Seita.4G226500	-0.721004	-1.0394	-1.35214	-0.781171	-0.423989	-0.352434	-0.526877	-0.0607259	-1.05557	-0.643802	-1.16573	-1.00698	1.25084	1.87981	1.20728	-0.191262	-0.438226	0.411352	0.452649	0.750999	-0.383234	2.06011	1.281	0.848503
Leaf_Cluster_C (1155)	Seita.4G239800	-0.654499	0.348398	-1.3945	-0.15956	-0.0183658	-0.0851395	-1.02307	-1.03431	-1.4893	-0.226398	-0.159021	-1.64097	2.12621	1.80241	1.16418	0.761531	1.2026	1.4091	-0.0441474	-0.0674589	-0.0120236	-0.218237	-0.241448	-0.345992
Leaf_Cluster_C (1155)	Seita.4G240200	-0.51357	-1.06105	-1.09673	-0.716104	-1.09806	0.144983	-0.14425	-0.39329	-0.877936	-0.78972	-1.31616	-0.646122	2.42843	1.87355	1.56629	0.570051	0.226432	0.31743	0.301645	0.0681138	-0.488887	1.35758	0.586241	-0.29886
Leaf_Cluster_C (1155)	Seita.4G241000	0.0814404	-0.00642315	-0.166378	-0.0609163	-0.538495	-0.0522506	-0.448622	-0.550725	-0.540785	-0.549511	-0.582804	-0.36233	3.26143	2.58007	1.47184	-0.411483	-0.36802	-0.523639	-0.54457	-0.413525	-0.457322	0.0553942	-0.430827	-0.441549
Leaf_Cluster_C (1155)	Seita.4G241400	-0.586204	-0.646866	-0.750764	-0.909313	-0.551265	-0.547671	-0.500248	-0.178531	-1.30467	-0.29249	-0.73442	-0.424896	1.6599	1.21494	1.44782	0.391543	0.407146	0.263169	-1.11524	-0.347497	-1.12175	2.34302	1.05161	1.23269
Leaf_Cluster_C (1155)	Seita.4G245200	-0.285163	0.549639	-0.192301	-0.205976	-0.369758	-0.099773	-0.569539	-0.438221	-0.543453	-0.323463	-0.864603	-1.13291	2.04937	1.56559	1.64901	0.979362	0.693783	-2.47863	-0.420041	-0.132436	-0.0996187	-0.970003	0.80269	0.836448
Leaf_Cluster_C (1155)	Seita.4G245500	-0.862082	-0.961141	-0.947824	-0.892293	-0.635356	-0.816609	-0.796959	-0.907886	-0.852721	-0.944133	-0.979436	-0.989787	2.37329	1.70616	0.877731	0.730223	0.706785	0.819607	0.303943	0.704898	0.075869	0.735858	1.08575	0.46611
Leaf_Cluster_C (1155)	Seita.4G252200	-0.484191	-0.104286	-0.372702	-0.409098	-0.471067	-0.12041	-0.16912	-0.398	-0.475019	-0.538983	-0.538983	-0.538983	3.63307	2.07973	1.52065	-0.0648391	-0.0093309	-0.0896298	-0.538983	-0.276772	-0.483331	-0.3275	-0.283236	-0.538983
Leaf_Cluster_C (1155)	Seita.4G255100	-0.281828	-0.122252	-0.180752	-0.646095	-0.892158	-0.894747	-0.62924	-0.724977	-0.981706	-0.905418	-0.981706	-0.75178	1.22205	1.37409	2.98322	1.05481	0.275787	1.12009	-0.543545	-0.360467	-0.544297	0.315988	0.0577312	1.0372
Leaf_Cluster_C (1155)	Seita.4G279600	-0.651611	-1.00838	-1.06418	0.901386	0.545767	0.943442	-1.12656	-0.541236	-0.755898	-1.72125	-1.48685	-1.59865	0.934302	0.805542	0.606148	0.718961	0.442465	0.649215	-0.101532	-0.108114	-0.262132	1.49766	1.621	0.760506
Leaf_Cluster_C (1155)	Seita.4G288400	-1.05407	-0.957808	-1.03298	-0.141115	-0.162505	-0.183347	-0.714197	-0.805277	-1.12916	-1.35393	-1.31593	-1.2574	2.12157	1.61065	1.07908	0.614498	0.435172	0.501029	0.41	0.138596	0.354854	1.26492	0.860102	0.71726
Leaf_Cluster_C (1155)	Seita.5G000900	-0.574742	-0.153762	-1.14841	-0.838204	-0.838875	-0.412557	-0.593235	-1.0998	-1.06513	-0.851965	-1.47499	-0.675343	2.38242	2.01418	1.04029	0.665448	0.42203	0.303179	-0.022827	0.487183	0.511438	0.946951	0.103618	0.873102
Leaf_Cluster_C (1155)	Seita.5G013200	-0.163506	-0.233266	-0.820076	-0.627464	-0.314544	-0.506496	-1.24938	-0.713351	-1.44601	-1.43567	-1.36306	-1.10565	2.09252	1.75772	1.18307	0.540596	0.678345	0.650459	-0.0167856	0.532066	0.24845	0.834792	0.834367	0.642876
Leaf_Cluster_C (1155)	Seita.5G014300	-0.823562	-0.893535	-0.952877	-0.919915	-0.912131	-0.919877	-0.899773	-0.904694	-0.890083	-0.872581	-0.901188	-0.891955	1.93344	1.58956	1.40297	0.939273	0.580956	0.849794	1.24535	0.518627	0.104799	0.970651	0.591941	0.0548065
Leaf_Cluster_C (1155)	Seita.5G020100	-0.450352	-0.55556	-0.460634	-0.428876	-0.55556	-0.55556	-0.55556	-0.55556	-0.55556	-0.55556	-0.55556	-0.55556	2.69111	2.8174	1.0946	1.17972	0.462592	0.665496	-0.55556	-0.466286	-0.340873	-0.454312	-0.198416	-0.55556
Leaf_Cluster_C (1155)	Seita.5G024400	-0.390973	-0.393153	-0.46699	-0.466586	-0.59557	-0.59557	-0.450771	-0.465342	-0.543064	-0.422595	-0.456625	-0.56174	2.13402	2.85752	1.38593	-0.459925	-0.59557	0.284653	-0.556583	-0.545152	-0.457781	1.9224	0.318165	-0.478702
Leaf_Cluster_C (1155)	Seita.5G026800	-0.696174	-0.696174	-0.696174	-0.696174	-0.696174	-0.696174	-0.653977	-0.675344	-0.696174	-0.696174	-0.617291	-0.696174	2.9529	2.41373	1.25481	0.581166	0.464819	0.713117	-0.13863	-0.102912	-0.307914	0.18436	0.178118	0.0186187
Leaf_Cluster_C (1155)	Seita.5G033200	-0.592894	-0.592894	-0.592894	-0.256984	-0.502363	-0.503793	-0.556238	-0.526988	-0.506773	-0.592894	-0.592894	-0.509369	3.59742	2.17738	0.823798	-0.269796	-0.511386	0.0955498	-0.164555	-0.271166	-0.441101	0.515828	0.406226	0.368778
Leaf_Cluster_C (1155)	Seita.5G037500	-0.0571105	0.287704	-1.12676	0.208081	0.271782	0.161943	-0.637738	-0.223527	-1.36655	-1.88228	-1.61491	-1.72432	1.71294	1.39712	0.704478	-0.327704	-0.562885	0.23796	1.32489	0.893273	0.596459	0.950986	0.581438	0.194741
Leaf_Cluster_C (1155)	Seita.5G038600	-0.0840829	-0.130136	-0.168405	-0.469185	-0.906111	-0.657063	-0.548483	-0.244062	-1.01552	-0.64868	-0.565926	-0.504315	2.39006	2.9049	1.78915	-0.268605	-0.21876	-0.44054	-0.675485	-0.390686	-0.458119	0.579998	0.36186	0.368204
Leaf_Cluster_C (1155)	Seita.5G042400	-1.01918	-0.739074	-1.15238	-1.30212	-1.72756	-0.912633	0.56553	0.370885	-0.0349607	0.023657	0.746235	-0.149389	2.56453	1.35513	1.58302	0.252653	0.41229	0.942702	-0.423419	-0.776109	-0.698552	-0.314922	0.0916184	0.342054
Leaf_Cluster_C (1155)	Seita.5G042600	-0.519948	-0.519948	-0.519948	-0.519948	-0.519948	-0.519948	-0.519948	-0.519948	-0.519948	-0.519948	-0.519948	-0.519948	3.62131	2.08535	1.20797	0.362117	0.279476	-0.0955865	-0.198092	-0.473956	-0.519948	0.149741	0.0571964	-0.236203
Leaf_Cluster_C (1155)	Seita.5G056900	-1.11629	-0.365162	-0.913978	-0.75432	-0.399519	-0.838946	-1.12981	-0.994989	-0.600878	-0.59889	-1.27089	-1.19573	1.96275	1.8182	1.37086	0.37686	0.527975	0.843135	0.0465079	-0.0725295	0.57466	0.472924	0.984579	1.27348
Leaf_Cluster_C (1155)	Seita.5G057300	-0.469902	-0.417603	-0.280967	-1.03212	-0.950966	-0.558092	-1.26615	-0.638779	-1.44057	-1.0436	-1.58338	-0.768092	1.91804	1.33732	1.15886	1.33591	0.580394	0.959502	0.32842	0.504874	0.363328	1.09577	0.588461	0.279341
Leaf_Cluster_C (1155)	Seita.5G062400	-0.57398	-0.742123	-0.76128	-0.520852	-0.628423	-0.538205	-0.619336	-0.529397	-0.549831	-0.416047	-0.344839	-0.466351	2.00935	3.10187	2.28396	-0.273872	0.0742402	-0.191011	-0.147929	-0.159854	-0.106863	0.16832	0.0818803	-0.149421
Leaf_Cluster_C (1155)	Seita.5G069100	-0.294507	-0.753629	-0.45485	-0.753629	-0.402455	-0.35855	-0.681961	-0.753629	-0.753629	-0.753629	-0.753629	-0.753629	3.30975	1.60308	1.06131	0.453139	0.469533	-5.78293e-06	-0.454961	-0.572105	-0.602998	1.11389	0.834301	0.252796
Leaf_Cluster_C (1155)	Seita.5G071600	-0.451791	-1.00869	0.426194	-0.000407467	0.320361	-0.393764	-1.4059	-1.37182	-1.07092	-1.60659	-1.55855	-1.25918	1.21845	1.48386	0.933619	0.432088	0.964593	0.833603	0.147534	0.538183	0.431845	0.0240358	1.34994	1.02331
Leaf_Cluster_C (1155)	Seita.5G072200	-0.258527	-0.0171194	0.1577	-0.597805	-0.430605	-0.520554	-0.471592	-0.442164	-0.715277	-0.962736	-0.950018	-0.688812	3.01847	2.45385	1.68752	-0.169191	-0.0563745	-0.425454	-0.191724	-0.21232	-0.183361	-0.145657	-0.450832	0.572586
Leaf_Cluster_C (1155)	Seita.5G073000	-1.25751	0.45878	0.0768376	-0.0754023	-0.522409	-0.435504	1.25399	-0.778848	-0.701969	-0.551675	-2.05027	-0.839358	1.64508	1.16172	1.85809	0.746862	0.320658	-0.561976	-1.03394	-0.623149	-0.591254	1.13528	0.273032	1.09294
Leaf_Cluster_C (1155)	Seita.5G080600	-0.876731	-0.572745	-0.374918	-0.59638	-0.495579	-0.42977	-0.872669	-0.605843	-0.798822	-0.927868	-0.927868	-0.927868	2.71492	2.36819	0.436977	0.0936496	-0.196484	0.479577	1.19933	0.740157	-0.488149	0.661815	0.666726	-0.269661
Leaf_Cluster_C (1155)	Seita.5G081100	-1.88761	-0.96617	-1.07494	0.113121	0.133281	0.225043	-0.86588	-0.736299	-1.37994	-0.524425	-0.69763	-0.86275	2.10349	1.33317	1.63216	-0.121513	0.0196197	0.774598	-0.215163	0.395177	-0.289348	0.895787	1.03288	0.963338
Leaf_Cluster_C (1155)	Seita.5G087900	-0.475434	0.0281306	-0.863368	0.0299945	-0.199376	0.126393	-0.807571	-0.71736	-1.14159	-0.670273	-0.775711	-0.783448	2.49723	2.545	1.19529	0.15351	0.144763	-0.1531	-0.722239	-0.838786	-0.83163	0.733088	0.703261	0.823234
Leaf_Cluster_C (1155)	Seita.5G088300	-0.658826	-0.624253	-0.644521	-0.658826	-0.658826	-0.658826	-0.610621	-0.658826	-0.658826	-0.658826	-0.641088	-0.658826	3.09923	1.98262	1.06118	0.969145	1.15078	0.637825	-0.38107	-0.355354	-0.454611	0.100562	0.233019	-0.252227
Leaf_Cluster_C (1155)	Seita.5G089300	-0.738596	-0.738596	-0.738596	-0.455733	-0.738596	-0.738596	-0.738596	-0.738596	-0.738596	-0.38809	-0.738596	-0.738596	1.19166	0.638831	0.776307	0.0127654	-0.0528736	1.36504	0.368597	0.136865	-0.738596	1.87436	2.93257	-0.275751
Leaf_Cluster_C (1155)	Seita.5G095400	-0.968771	-0.705741	-0.978157	-0.0137802	0.390074	0.90637	-1.18368	-1.14902	-1.07314	-0.45481	-0.511155	0.113101	2.58609	1.88246	0.0418125	-0.330348	0.68453	0.45824	-0.757571	-0.615861	-0.950847	1.12642	0.728519	0.775258
Leaf_Cluster_C (1155)	Seita.5G110600	-0.878996	-0.812812	-1.03023	-0.337744	-0.867609	-0.872812	-0.520706	-0.330289	-0.196976	-1.5093	-1.88595	-1.06737	1.98049	1.41486	0.50428	0.278977	0.159755	0.987499	0.883806	0.984476	0.773092	0.898267	0.83961	0.605677
Leaf_Cluster_C (1155)	Seita.5G113000	-0.562671	-0.546135	-1.94788	0.270145	-0.112279	-0.366033	-1.09491	-1.38099	-1.07256	-0.565607	-1.27613	-0.62577	2.25841	1.4436	0.160391	1.01391	0.429326	0.931265	0.236735	0.189883	0.389363	1.16875	0.926246	0.132932
Leaf_Cluster_C (1155)	Seita.5G113700	-0.986723	-0.628882	-1.49647	0.374202	0.809764	0.170539	-0.876311	-0.895256	-1.36015	-1.3294	-1.34547	-0.952654	1.59169	1.53251	0.67919	1.37539	1.22884	1.19589	-0.0244008	-0.0680513	-0.0638604	0.517041	0.106693	0.44588
Leaf_Cluster_C (1155)	Seita.5G115800	-0.201858	-0.583283	-0.423254	-0.884129	-1.03649	-0.812232	-0.0426877	0.492668	0.48087	-0.813351	-1.06705	-0.593056	1.23654	1.18164	0.879287	-1.22312	-1.44702	-1.28148	0.50475	0.461066	0.365123	1.80642	1.51168	1.48896
Leaf_Cluster_C (1155)	Seita.5G123900	-0.0555392	-0.808205	0.081106	-0.166605	-0.501552	0.69744	-0.920049	-0.80967	-0.950769	-1.34835	-1.54383	-1.01101	2.11915	1.68584	1.75183	1.00942	0.685058	0.665252	0.435374	-0.613277	-0.806573	0.523392	0.177537	-0.295961
Leaf_Cluster_C (1155)	Seita.5G126200	-0.423494	-0.341406	-0.296488	0.282089	-0.099563	0.0632562	-1.54327	-1.25571	-1.14944	-1.219	-1.84625	-1.10413	2.08249	1.63903	1.25087	0.76912	0.517402	0.78188	0.302808	0.204385	-0.0248113	0.80608	0.530669	0.0734745
Leaf_Cluster_C (1155)	Seita.5G134100	-1.087	-0.573862	-1.29411	-0.929278	-0.441462	-1.03913	-0.718192	-0.531712	-0.947615	-0.827397	-1.22289	-0.857926	1.68808	1.7849	0.643037	1.31512	1.24534	0.62221	-0.152567	0.384483	0.118068	0.851063	0.766774	1.20406
Leaf_Cluster_C (1155)	Seita.5G134800	-0.457884	-0.330253	-1.05472	-0.74849	-0.336437	-0.782988	-1.03262	-0.632248	-1.30628	-0.804293	-1.09875	-0.485831	2.72824	2.03031	1.17756	0.778027	0.603598	0.621915	0.725625	0.136269	0.305044	-0.217989	0.0241677	0.158014
Leaf_Cluster_C (1155)	Seita.5G149600	-0.900475	-1.01435	-0.830204	-0.726426	-0.775866	-0.334891	-0.859803	-0.921619	-0.948857	-0.991478	-1.02078	-1.0338	2.50576	0.918501	0.837483	1.52174	0.885219	0.727402	0.529242	0.327652	0.247859	1.18462	0.576756	0.0963156
Leaf_Cluster_C (1155)	Seita.5G154300	-0.905162	-0.446666	-1.3021	-1.32677	-0.853882	-1.00447	-0.599069	-0.898584	-1.16313	-0.542537	-0.472113	-0.934256	1.37263	1.71958	0.942036	0.316814	0.0833172	1.0687	0.407059	0.635348	-0.00933389	1.6297	1.32712	0.955764
Leaf_Cluster_C (1155)	Seita.5G158100	-0.225857	-0.457859	-0.654466	-0.112394	0.212577	-0.0948083	-0.713579	-0.946265	-0.820271	-1.76204	-1.6546	-1.54117	1.93323	1.97905	0.976214	0.343611	0.253346	0.504522	-0.226426	-0.054439	0.323288	0.530919	0.984875	1.22256
Leaf_Cluster_C (1155)	Seita.5G160400	-1.41586	-1.63306	-0.988251	-0.499734	-0.363252	-0.35872	0.0594525	-0.602083	-0.679944	-0.353198	-0.130879	-0.825553	1.56592	2.02535	1.5045	-0.629914	-0.113312	-0.0793036	0.0670523	-0.18643	-0.448566	1.09973	1.33817	1.64788
Leaf_Cluster_C (1155)	Seita.5G161300	-0.562624	0.260053	-1.08093	-0.111957	0.181603	-0.498372	-0.963516	-0.21053	-1.21882	-0.839617	-0.965339	-0.804541	2.46662	3.04099	0.48036	0.453629	0.489498	0.211854	0.0817553	-0.462888	-0.0385015	0.142803	-0.264691	0.213166
Leaf_Cluster_C (1155)	Seita.5G166200	-0.775254	-0.775254	-0.752722	-0.775254	-0.775254	-0.71566	-0.660221	-0.739451	-0.775254	-0.695769	-0.775254	-0.720737	2.24089	2.13412	1.31872	1.60222	0.99961	1.00625	0.234845	0.0360541	-0.316293	0.287699	-0.230446	-0.377588
Leaf_Cluster_C (1155)	Seita.5G166300	-0.841367	-0.841367	-0.841367	-0.841367	-0.841367	-0.841367	-0.13122	-0.627163	-0.41282	-0.841367	-0.74594	-0.841367	1.89113	2.12136	1.81624	1.30132	0.918742	1.29619	0.231713	-0.286797	-0.331381	0.247002	-0.0100937	-0.547356
Leaf_Cluster_C (1155)	Seita.5G166900	-1.5765	-0.309364	-0.69873	-1.12161	-0.917476	-0.773189	-0.545169	-0.565008	-0.205731	0.305338	1.21792	-0.540103	1.80822	1.2946	0.987511	0.826734	1.34504	0.580858	-1.1911	-1.25165	-1.03525	0.794741	0.915805	0.654108
Leaf_Cluster_C (1155)	Seita.5G171100	-0.646796	-0.798454	-1.10898	-0.810772	-0.811395	-0.697284	-0.753464	-0.700606	-0.641172	-0.177185	-0.841691	-0.709547	1.86439	1.66254	0.861265	1.65575	1.98786	1.38811	0.259851	-0.226412	0.264026	-0.239983	-0.543949	-0.236098
Leaf_Cluster_C (1155)	Seita.5G194300	-0.353279	-0.0474905	-0.452033	-0.392173	-0.312987	0.0153223	-1.01081	-0.760701	-1.32795	-1.93819	-1.49149	-1.70041	1.42	1.32513	1.17781	0.641441	0.443909	0.61906	1.25425	1.04407	0.775874	0.7331	0.459707	-0.122164
Leaf_Cluster_C (1155)	Seita.5G202000	-0.296798	0.0893891	-0.673835	-0.644621	-0.53143	-0.903969	-1.44869	-1.05207	-1.64757	-0.926001	-1.12449	-0.726785	1.79676	1.30495	1.12086	1.47255	1.14853	1.09702	0.381307	0.702282	0.679813	0.559412	-0.162198	-0.214421
Leaf_Cluster_C (1155)	Seita.5G218600	-0.850373	-0.750504	-1.08357	-0.528053	-0.230782	-0.355821	-1.08432	-1.1114	-1.16487	-0.526448	-1.087	-1.34177	2.55606	1.33561	0.918017	0.522563	0.581986	1.02351	0.998448	0.427425	-0.0250886	0.555195	0.597547	0.623633
Leaf_Cluster_C (1155)	Seita.5G224100	-0.0737395	1.2625	-0.233072	-0.485046	-0.567191	-0.000458203	-0.300667	-0.579038	-0.603222	-0.327499	-0.564683	-0.870195	2.31712	2.83276	1.7736	-0.0903707	-0.201253	0.0252301	-0.459798	-0.110631	-0.384398	-0.783988	-0.79378	-0.782172
Leaf_Cluster_C (1155)	Seita.5G237300	-0.47205	-1.27469	-1.30572	-0.898383	-0.172405	-0.924015	0.902733	-0.123121	1.23603	-0.696739	-0.535613	-1.22782	1.17491	1.02156	1.85849	-0.372666	-0.883899	-0.523728	1.91239	0.312102	-0.0299859	-0.650224	1.32074	0.352091
Leaf_Cluster_C (1155)	Seita.5G239000	-0.184623	0.509267	-0.873537	-0.906907	-0.879649	0.577395	-1.12344	-1.31079	-1.36322	-0.0818816	-0.760972	-0.504352	1.05555	1.84524	1.70252	0.0798003	0.0417777	0.375791	-0.12899	0.0312325	-0.385893	2.56109	-0.184638	-0.0907637
Leaf_Cluster_C (1155)	Seita.5G239900	-0.679284	0.104016	-0.765727	-0.751329	0.0258443	-0.207399	-0.462082	-0.662271	-1.42234	-1.08049	-1.30757	-0.530944	1.72002	2.44256	2.04757	1.0696	0.219739	-0.40596	-0.304504	-0.292977	0.325356	0.783188	-0.175198	0.31018
Leaf_Cluster_C (1155)	Seita.5G243500	-2.02042	-0.387525	-0.0314427	-2.02042	-0.528175	-0.29465	-0.518329	-0.429737	-0.832283	-0.463579	-0.610679	-0.754273	1.40845	1.50595	0.653005	0.748732	-0.809781	-0.343283	1.23414	1.18486	0.718821	1.18003	0.999218	0.411389
Leaf_Cluster_C (1155)	Seita.5G248000	-0.707422	-0.585449	-0.707422	-0.707422	-0.707422	-0.629482	-0.631047	-0.707422	-0.675781	-0.707422	-0.681216	-0.707422	1.94383	1.75071	1.4335	1.72453	1.58087	1.56484	-0.255966	-0.275827	-0.343635	-0.268807	-0.20397	-0.495128
Leaf_Cluster_C (1155)	Seita.5G250500	-0.806197	-0.771798	-0.726431	-0.953114	-0.707634	-0.756391	-0.708023	-0.727981	-0.86559	-0.877972	-0.881185	-0.953114	2.55724	2.10896	1.21747	0.139552	0.622058	-0.0716309	0.256702	0.113108	0.545501	0.8314	0.535162	0.879901
Leaf_Cluster_C (1155)	Seita.5G259700	-0.497933	-1.29	-0.164736	-1.35241	0.0931727	-0.477898	1.03357	0.688501	-0.421417	-0.657204	-0.485448	0.593763	1.80141	2.64763	1.44499	-0.074839	0.0649428	-0.0522403	0.0466742	-0.29657	0.544678	-0.855476	-1.33791	-0.995251
Leaf_Cluster_C (1155)	Seita.5G260200	-0.393871	-1.25425	0.157319	-1.34209	0.426069	-0.237806	1.26297	0.876833	-0.652579	-0.65301	-0.39616	0.77564	1.58767	2.53927	1.28113	-0.462206	0.269025	0.137041	0.0433942	-1.12829	0.142435	-1.10985	-1.08475	-0.783948
Leaf_Cluster_C (1155)	Seita.5G263600	-1.11216	-0.842961	-1.00817	-1.14232	-1.45023	-0.423081	1.11684	0.46726	-0.391584	-1.15713	-1.34378	-1.12009	0.897588	1.41044	0.631341	0.151951	0.0818456	1.09119	0.464838	0.546856	-0.592076	1.79141	0.771726	1.1603
Leaf_Cluster_C (1155)	Seita.5G270700	-0.186527	-0.307934	-0.328857	-0.617283	-0.491287	-0.337498	-0.519765	-0.556813	-0.74902	-0.74902	-0.74902	-0.74902	2.9103	0.700262	1.04804	1.84391	1.15028	1.40597	-0.74902	-0.74902	-0.14314	-0.74902	0.422505	-0.74902
Leaf_Cluster_C (1155)	Seita.5G279900	0.404823	-0.194073	-0.88265	1.01894	-0.88265	0.119541	-0.88265	-0.88265	-0.88265	-0.803159	-0.746084	-0.532682	1.23418	1.81091	0.990171	1.34263	0.726233	1.53959	1.58618	-0.783782	-0.679546	-0.881	-0.857306	-0.882311
Leaf_Cluster_C (1155)	Seita.5G284300	-0.871565	-0.926284	-0.74104	-0.62022	-0.777385	-0.732206	-0.341126	-0.86223	-1.03974	-0.969236	-0.941562	-1.03974	1.83078	1.32682	2.1017	1.54263	1.0684	0.476395	0.782854	0.242107	0.101938	0.636899	0.0553918	-0.303584
Leaf_Cluster_C (1155)	Seita.5G284400	-1.24804	0.388198	0.478246	0.228346	-0.268593	0.395964	1.36086	-0.354773	-1.23585	-1.08359	-1.59209	-1.01923	1.7956	1.4596	2.37502	0.551859	0.348995	-0.64467	-0.179849	-0.449696	-0.318724	-0.19924	-0.444948	-0.343398
Leaf_Cluster_C (1155)	Seita.5G284700	-0.552345	-0.390508	-0.438665	-0.331336	-0.325346	-0.38579	-0.438432	-0.455979	-0.552345	-0.552345	-0.552345	-0.552345	2.55693	3.12741	1.8266	-0.00639426	0.0501012	-0.28389	-0.552345	-0.0906552	-0.232343	-0.285098	-0.225547	-0.356986
Leaf_Cluster_C (1155)	Seita.5G286300	-0.543771	-1.30069	-0.606226	-1.18332	-0.864472	-0.823106	-0.334302	-0.308246	-0.960692	-0.859829	-1.21967	-0.89423	1.56787	1.73433	0.943623	-0.437331	-0.275696	0.379156	1.20254	0.799058	0.704276	1.69456	1.09805	0.488107
Leaf_Cluster_C (1155)	Seita.5G294000	-0.11758	0.280638	0.515363	-0.662084	-1.02377	-0.842563	-0.441903	-0.377142	-0.199484	-0.0832611	-0.928145	-0.161218	2.08982	2.41894	2.51295	-0.192561	-0.50762	0.513897	0.0566924	-0.281162	-0.257713	-0.467998	-0.840356	-1.00374
Leaf_Cluster_C (1155)	Seita.5G307200	-0.517911	-0.477556	-0.521216	-0.552342	-0.552342	-0.552342	-0.552342	-0.552342	-0.552342	-0.552342	-0.552342	-0.552342	3.57137	2.24055	0.785185	0.44113	0.537896	0.425478	-0.320969	-0.261935	-0.39875	-0.192158	-0.218676	-0.121356
Leaf_Cluster_C (1155)	Seita.5G307400	-1.12553	-0.959237	-1.10001	-0.0593448	-0.12264	-0.187159	-1.02682	-0.730604	-0.811493	-1.32271	-1.39934	-1.29643	1.59131	1.35534	1.19013	0.636211	0.59014	0.579511	-0.002521	0.288744	0.058591	1.2804	1.32057	1.25289
Leaf_Cluster_C (1155)	Seita.5G314300	-0.690631	-0.634107	-0.609007	-0.690631	-0.690631	-0.616006	-0.560327	-0.589328	-0.559531	-0.690631	-0.690631	-0.665694	2.71313	2.23469	2.08792	0.807608	0.465756	0.477321	-0.204754	-0.251162	-0.146295	-0.173969	-0.0497625	-0.273335
Leaf_Cluster_C (1155)	Seita.5G319600	-1.08754	-0.573384	-0.745745	-0.803392	-0.727328	-0.341215	-0.40219	-0.747681	-1.0022	-0.863829	-1.33212	-1.22391	1.77693	0.481988	2.35978	1.5332	1.03337	0.664692	0.0950274	0.308669	0.0405292	0.681055	0.186608	0.688686
Leaf_Cluster_C (1155)	Seita.5G324400	-0.494629	-0.0132931	-0.313346	0.436852	-0.0017791	0.658526	-0.609772	-0.41996	-0.779873	-0.974173	-1.05383	-1.02916	2.5204	1.71109	1.06642	-0.542314	-0.690747	0.101406	-0.698003	-0.847596	-1.12153	1.52444	1.30367	0.267203
Leaf_Cluster_C (1155)	Seita.5G329900	-0.681851	-0.681851	-0.621156	-0.681851	-0.681851	-0.484794	-0.65008	-0.563662	-0.681851	-0.581986	-0.617524	-0.681851	3.26302	1.91404	1.61283	0.465166	0.204445	0.66251	-0.0589162	-0.180675	-0.477797	0.336929	0.192773	-0.324019
Leaf_Cluster_C (1155)	Seita.5G332300	0.139256	0.260198	-0.676223	-0.238699	-0.887253	-0.733939	-0.894986	-0.751467	-0.833709	-0.582832	-0.676687	-1.06544	2.68454	2.78687	0.966504	-0.610604	-0.305082	0.180298	-0.00333448	0.310975	0.243022	-0.165693	0.176993	0.677294
Leaf_Cluster_C (1155)	Seita.5G337500	-0.84064	-0.824849	-0.834585	-0.91449	-0.828517	-0.734119	0.110974	-0.523751	-0.803146	-0.836478	-0.892806	-0.91449	1.43468	1.55182	1.93404	1.66742	1.11766	1.04325	0.89776	0.414937	0.498287	-0.396813	-0.631273	-0.69486
Leaf_Cluster_C (1155)	Seita.5G339000	-0.638775	0.111132	-0.666626	-0.689476	-0.833739	-0.315193	-0.319432	-0.777826	-0.777304	-0.65767	-0.726451	-0.657726	2.48889	2.7487	1.67159	0.862544	0.615799	-0.135105	-0.0302111	-0.0337527	-0.441151	-0.119664	-0.470461	-0.208104
Leaf_Cluster_C (1155)	Seita.5G339100	-0.358189	-0.295207	-0.648229	-0.860002	-0.741418	-0.756439	-1.18904	-0.9984	-1.05733	-1.26946	-1.17803	-1.25796	1.83806	1.83194	1.51409	0.579673	0.4443	0.757511	0.632548	0.660529	0.617756	0.51477	0.737597	0.480943
Leaf_Cluster_C (1155)	Seita.5G341700	-0.989099	-0.366141	-0.690096	-0.596467	-0.61057	-0.960632	-0.910237	-0.948016	-0.627978	-1.5323	-1.31443	-1.20598	1.8889	1.47101	0.914583	0.243439	0.340913	0.478498	1.05593	1.01729	1.11194	0.499293	0.82435	0.905804
Leaf_Cluster_C (1155)	Seita.5G342100	-0.776077	-0.966585	-1.1565	-0.51138	-0.310487	-0.73361	-1.05141	-0.972755	-0.724036	-1.24482	-1.28859	-1.11544	1.42269	2.0612	0.976917	0.841216	0.552073	0.445484	0.483414	0.504315	0.736756	0.757645	1.12021	0.949773
Leaf_Cluster_C (1155)	Seita.5G348200	-0.702391	-0.369253	-0.0344001	0.097101	-0.0188554	0.194239	-0.799246	-0.48256	-1.23923	-1.15481	-1.64366	-1.61152	2.26859	2.27833	1.40317	0.408133	0.10293	0.389825	-0.301403	0.00331341	0.0144687	0.176378	0.552162	0.468693
Leaf_Cluster_C (1155)	Seita.5G351300	-0.388908	-0.429758	-0.686817	-0.756221	-0.660672	-0.709501	-0.534547	-0.756221	-0.66655	-0.756221	-0.756221	-0.756221	1.97788	1.87901	1.26301	-0.239589	-0.588649	-0.100784	-0.367195	-0.301347	-0.377069	1.92093	1.75406	1.03761
Leaf_Cluster_C (1155)	Seita.5G355000	-0.800552	-0.800552	-0.800552	-0.800552	-0.599469	-0.700259	-0.564784	-0.800552	-0.703596	-0.717137	-0.572779	-0.706501	2.89439	1.97876	1.15632	1.24222	0.54279	0.761067	0.0836322	-0.385017	-0.437352	0.624872	0.0725056	0.0330931
Leaf_Cluster_C (1155)	Seita.5G355700	-0.553345	0.252583	-1.1986	-0.0306496	0.431698	-0.110178	0.422135	0.315737	-0.506308	-1.26066	-1.86473	-1.52944	1.75935	1.67729	0.532508	1.28453	1.38472	1.09323	-0.115716	0.312618	0.088132	-0.561399	-0.947782	-0.875718
Leaf_Cluster_C (1155)	Seita.5G357100	-0.582832	-0.400514	-1.6635	-0.00864974	-0.000940512	-0.593963	-0.839127	-0.158128	-0.427414	-1.1524	-1.86782	-1.25321	1.92498	2.26209	0.966658	-0.112489	0.116324	0.124392	0.630879	0.660132	0.60695	0.675033	0.432283	0.661272
Leaf_Cluster_C (1155)	Seita.5G358900	-0.391355	-0.408016	-0.669761	-0.723937	-0.698572	-0.432098	-0.632217	-0.735605	-1.46263	-1.06522	-1.42571	-0.500008	1.93088	1.38788	1.33103	1.95893	1.16765	0.638324	-0.594387	-0.0862279	-0.206829	0.305752	0.923718	0.388396
Leaf_Cluster_C (1155)	Seita.5G362000	-1.00079	-0.491446	-0.820367	-0.850756	-0.474337	-0.493267	-0.153861	-0.784065	-0.858228	-0.893567	-0.852589	-0.926251	1.80816	1.97234	1.78047	2.00741	1.18382	-0.31232	0.118938	0.132123	0.027148	0.347937	-0.313766	-0.152737
Leaf_Cluster_C (1155)	Seita.5G370700	-0.326441	-1.35293	-0.966786	-0.28516	0.270846	0.0659553	-0.0388749	-0.0313701	-0.821037	-1.40884	-0.737123	-1.67417	1.87049	2.12821	1.52836	-0.0219834	-0.132756	-0.132503	-0.361338	-0.21876	-0.381857	1.26763	1.08205	0.678377
Leaf_Cluster_C (1155)	Seita.5G370900	-0.399895	-0.393689	-0.793103	-0.921914	-0.243593	-0.437793	-1.06101	-1.20395	-1.00183	-0.804793	-1.05372	-0.759348	2.10342	2.07851	1.15187	-0.223318	-0.0812792	0.548328	0.294883	0.325332	-0.494869	1.58059	1.08658	0.704587
Leaf_Cluster_C (1155)	Seita.5G377200	-0.466347	0.222696	-0.291045	-0.137241	-0.938539	-0.0524065	-1.17831	-0.564771	-0.685629	-0.753531	-1.15498	-0.366976	2.662	2.14938	1.08049	-0.277881	-0.476446	-0.203444	-1.07634	-0.285129	-0.171159	0.723394	1.06378	1.17843
Leaf_Cluster_C (1155)	Seita.5G378400	-0.471576	-0.471576	-0.471576	-0.471576	-0.471576	-0.471576	-0.471576	-0.471576	-0.471576	-0.471576	-0.471576	-0.471576	3.17525	2.65767	1.54908	-0.321228	-0.433473	-0.124658	0.188673	0.000501022	0.0754268	-0.236946	-0.471576	-0.399815
Leaf_Cluster_C (1155)	Seita.5G381800	-0.893653	-0.121256	-0.978118	-0.95853	-0.909139	-0.916648	-0.854821	-0.64583	-0.775144	-0.806036	-0.779311	-0.836589	2.62129	2.06271	1.40951	0.558832	0.554922	0.527368	0.342786	0.0433892	-0.166964	0.584483	0.478992	0.45776
Leaf_Cluster_C (1155)	Seita.5G388600	-0.845447	-0.253215	0.0490741	-0.596399	-0.670303	-0.275575	-0.0279805	-0.922477	-0.678396	-1.41106	-2.14822	-1.46176	1.48395	1.37633	1.80787	0.590072	0.183541	-0.119608	0.169704	0.854767	0.117854	1.26245	0.695538	0.819284
Leaf_Cluster_C (1155)	Seita.5G390200	-0.0061713	0.281083	-0.312154	-0.0824563	0.232479	-0.0405116	-0.899904	-0.184679	-1.32712	-1.32712	-1.32712	-0.994503	2.3868	2.53524	1.45548	0.23575	0.30226	0.682419	-0.0280317	-0.471944	-0.358385	0.0551426	-0.170043	-0.636512
Leaf_Cluster_C (1155)	Seita.5G390600	-0.994391	-1.12249	-1.49014	0.631782	0.699083	0.445622	-0.829891	-1.12716	-0.800054	-1.34417	-1.28208	-1.25517	1.47284	1.49909	0.328818	0.524156	0.625557	0.59917	0.107709	0.00244082	-0.227328	1.31036	1.18656	1.0397
Leaf_Cluster_C (1155)	Seita.5G391300	-0.809268	-0.634844	-0.707254	-0.721831	-0.53756	-0.351585	-0.293694	-0.591613	-0.728526	-0.922459	-0.922459	-0.85741	2.22435	1.48373	2.21771	1.87312	0.759037	-0.129959	-0.255577	-0.187939	-0.692812	0.342286	0.485475	-0.0409248
Leaf_Cluster_C (1155)	Seita.5G393300	-0.863297	-0.708904	-0.805633	-0.923522	-0.456059	-0.578899	-0.615799	-0.900315	-1.14845	-1.13598	-1.10582	-1.18214	2.23325	1.90306	1.11899	0.604829	0.405014	1.05995	0.568504	0.652725	0.301229	0.402204	0.788734	0.386347
Leaf_Cluster_C (1155)	Seita.5G393400	-0.400218	-0.26111	-1.91406	-0.285139	-0.458937	-0.497097	0.0172997	-0.743909	-0.863235	-1.27332	-1.30762	-0.887843	1.81835	1.67901	0.921981	1.1591	1.21201	1.29935	-0.332303	-0.0509716	-0.236774	0.177122	0.0143728	1.21395
Leaf_Cluster_C (1155)	Seita.5G398900	-0.531614	-0.833588	-1.07112	-0.521163	-0.311805	1.02486	-0.863737	-0.604016	-0.829362	-1.42802	-1.74145	-1.53245	1.1147	1.88782	0.545481	-0.0471017	0.00859678	1.15737	0.931301	0.635793	0.318264	0.885797	0.858259	0.947182
Leaf_Cluster_C (1155)	Seita.5G400300	-0.451592	-0.686726	-0.796946	-0.131298	0.340183	0.0445221	-1.13097	-1.14797	-0.358124	-1.72355	-1.45399	-1.59309	1.60195	1.34897	0.809813	0.429414	0.983881	1.0568	-0.275526	0.415748	-0.444498	0.967377	1.32478	0.870857
Leaf_Cluster_C (1155)	Seita.5G403700	-0.606048	-0.314766	-1.01472	0.450042	0.0853969	0.461507	-1.51645	-0.984545	-0.862505	-0.6212	-1.16741	-1.33187	1.59022	1.14609	0.66624	1.76156	1.53934	1.68235	0.187295	0.0813118	-0.0773646	-0.122824	-0.090586	-0.941057
Leaf_Cluster_C (1155)	Seita.5G404100	-0.535071	-0.669423	-1.10826	0.891264	0.942019	1.10313	-0.540718	-0.494796	-1.12595	-1.12403	-1.07592	-1.04172	1.91556	1.43442	0.578019	-0.396562	-0.568337	0.018335	-0.608813	-0.527796	-0.875783	1.41108	1.19382	1.20552
Leaf_Cluster_C (1155)	Seita.5G422900	-0.509299	-0.162054	-0.726743	-0.565549	-0.805436	-0.654247	-0.723109	-0.143905	-0.147591	-1.7333	-1.81947	-1.71104	2.01863	1.62456	0.688596	0.34179	0.0646303	0.434748	0.81304	0.852698	0.589947	0.885548	0.67743	0.710116
Leaf_Cluster_C (1155)	Seita.5G426100	-1.00467	-0.584522	-1.04344	0.450531	0.223028	0.359557	-1.06892	-0.466815	-0.58007	-1.74549	-1.49648	-1.85958	1.37593	0.889552	1.46611	0.897289	0.302319	0.817796	0.47989	0.0933341	-0.137971	1.41345	1.02106	0.198117
Leaf_Cluster_C (1155)	Seita.5G432600	-1.18772	-0.819496	-1.43065	0.634385	0.315417	0.266203	-1.63119	-0.858966	-1.62231	-0.990203	-0.530594	-0.30781	1.38018	1.29825	0.625112	0.712556	0.7297	0.209827	-0.485681	-0.4051	0.0840537	1.40793	1.47673	1.12937
Leaf_Cluster_C (1155)	Seita.5G432800	-0.721282	-0.471706	-0.914183	-1.46763	0.18148	0.705679	-1.21177	-0.733157	-1.18843	-1.09511	-1.10836	-0.873501	0.871649	1.53003	0.931945	1.51329	0.336607	0.437704	-0.0682123	-0.0176843	-0.474821	1.60057	1.48543	0.751469
Leaf_Cluster_C (1155)	Seita.5G439500	-1.21966	-0.657003	-1.49438	-0.240543	-0.425165	-0.773474	-0.32012	-0.883293	-0.600243	-0.997343	-0.804028	-1.07184	1.99664	2.11728	0.136314	1.43862	1.08974	1.15531	0.170193	0.0652112	0.788697	0.401775	-0.127418	0.254732
Leaf_Cluster_C (1155)	Seita.5G439600	-0.644239	-0.128386	-1.04824	-0.688588	-0.279843	-0.887497	-0.644449	-0.829046	-1.19952	-0.861312	-1.10379	-1.03518	2.46788	1.98391	1.42503	0.669683	0.255635	0.496855	0.31405	0.429832	-0.0442753	1.20067	0.0644722	0.0863486
Leaf_Cluster_C (1155)	Seita.5G448200	-0.158864	-0.393608	-0.689901	-0.356459	-0.0887895	-0.00786428	-1.60489	-1.41868	-1.70669	-0.303313	-0.152871	-0.59361	1.60571	0.981367	1.49793	1.32617	0.991629	1.23857	-0.829691	-0.713115	-0.994362	0.796991	1.03064	0.543695
Leaf_Cluster_C (1155)	Seita.5G453200	-0.697266	-0.203596	-0.856206	0.239846	-0.230578	0.00141747	-1.15293	-0.864922	-1.34199	-0.527278	-1.00963	-0.74677	1.754	1.49477	1.34803	1.17412	0.862204	0.923794	-1.00638	-1.18984	-0.732747	1.35549	0.700804	0.705659
Leaf_Cluster_C (1155)	Seita.5G453300	-0.623996	-1.12264	-1.12221	-0.201304	-0.239817	-0.101849	-0.878801	-0.786586	-1.18529	-0.539586	-1.04419	-0.972228	2.15987	1.42596	1.31105	1.37503	0.911364	0.768719	-0.342648	-0.732909	-0.517963	1.06051	0.47221	0.92731
Leaf_Cluster_C (1155)	Seita.5G453500	-0.228744	0.00457831	-0.616147	0.793725	0.409916	0.536686	-0.734429	-0.444747	-1.03052	-1.36493	-1.81291	-1.40004	1.95784	1.84806	1.0397	0.345782	-0.152524	-0.0414275	-0.886862	-0.620143	-0.379515	1.27149	0.621246	0.8839
Leaf_Cluster_C (1155)	Seita.5G456800	-0.84149	-0.829861	-0.862372	-0.449598	0.109255	-0.605798	-0.363753	-0.919929	-1.28125	-0.818441	-1.04062	-0.847125	1.84926	0.96645	2.44415	1.41435	0.256505	-0.00603972	0.767692	0.429461	0.169306	1.23819	-0.668064	-0.110278
Leaf_Cluster_C (1155)	Seita.5G459500	-0.697433	-0.763596	-0.763596	-0.763596	-0.452508	-0.763596	-0.514351	-0.763596	-0.763596	-0.632483	-0.763596	-0.652966	3.47747	1.66314	0.88819	0.288023	0.573624	0.359084	-0.00228248	0.127938	-0.483871	0.617095	0.452619	0.333884
Leaf_Cluster_C (1155)	Seita.5G461600	-0.77627	-1.16927	-0.640444	0.499499	-0.0973452	0.06576	-1.43626	-0.851836	-0.708946	-0.946632	-1.50737	-0.879087	1.4987	0.155254	1.0097	-0.10877	0.436104	-0.211465	-0.0165003	-0.229847	0.748363	1.93744	1.5538	1.67542
Leaf_Cluster_C (1155)	Seita.5G463700	-0.596882	-0.654204	-0.914899	-0.56608	-0.761828	-0.766106	-0.625795	-0.804129	-0.778098	-0.566695	-0.586435	-0.709617	1.43653	0.356835	1.71972	2.50411	0.683354	0.763962	-0.605217	-0.809844	-0.42969	1.68701	0.385455	0.638537
Leaf_Cluster_C (1155)	Seita.5G468100	-1.11799	-1.26208	-1.33943	0.270433	0.0874847	0.325455	-0.0564637	-0.0950015	-0.120333	-0.662547	-1.08886	-0.834997	1.10726	1.15719	1.19161	-0.134793	-0.15331	-0.261923	-0.921892	-0.593779	-0.8957	1.87716	1.76899	1.75353
Leaf_Cluster_C (1155)	Seita.5G469400	-0.579776	-0.100483	-0.498686	-0.207606	-0.856199	-0.265938	-0.87406	-1.03797	-0.208388	-0.466329	-1.03797	-0.967707	2.37792	2.19119	1.77892	0.353136	0.30121	0.196904	-0.653268	-0.905784	-0.670525	0.267584	0.755642	1.10819
Leaf_Cluster_C (1155)	Seita.6G003500	-0.419526	-0.542896	-1.18072	-0.924058	0.149752	-0.506278	-1.43486	-1.66672	-1.21809	-0.182937	-0.463683	-0.192721	1.54632	1.66935	1.09196	1.20592	1.33572	1.30203	-0.574836	-0.317166	-0.460198	1.0195	0.625386	0.138759
Leaf_Cluster_C (1155)	Seita.6G005400	-0.540269	-0.739239	-0.837007	-0.837007	-0.837007	-0.705369	-0.631619	-0.397671	-0.709566	-0.837007	-0.636672	-0.837007	2.45409	2.006	1.18148	1.26095	0.914505	1.3256	-0.244613	-0.575163	-0.150571	0.57857	0.284673	-0.490074
Leaf_Cluster_C (1155)	Seita.6G008100	-0.879338	-0.952721	-0.827299	-0.634241	-0.651691	-1.04518	-1.04518	-0.897719	-0.770704	-0.690327	-1.04518	-0.769004	1.16353	1.59534	2.58183	1.21067	0.261447	0.704925	0.625335	0.747916	0.494211	0.126649	0.430432	0.266288
Leaf_Cluster_C (1155)	Seita.6G047800	-0.852703	-0.784027	-0.824587	-0.882387	-0.824715	-0.892152	-0.78836	-0.662459	-0.94947	-0.497566	-0.594107	-0.244298	2.64398	2.22493	1.09057	0.712568	0.761853	0.864044	-0.181569	-0.176208	-0.601333	0.461487	0.472379	0.524125
Leaf_Cluster_C (1155)	Seita.6G073100	-0.260051	0.377289	-0.460036	-0.254626	0.0588985	-0.0422025	-0.684364	-0.393917	-0.754879	-0.839955	-1.14952	-0.934968	3.12647	2.29126	1.22218	-0.166501	0.305491	0.428679	-0.631622	-0.724999	-0.66866	-0.279382	0.369528	0.0658819
Leaf_Cluster_C (1155)	Seita.6G080800	-0.72398	0.547176	-0.250023	-0.368729	0.457689	-0.0627024	-0.964895	-0.964895	-0.964895	-0.485729	0.126168	-0.182729	1.99862	2.50427	1.98024	0.00650116	-0.706743	-0.772243	-0.964895	-0.869174	-0.787147	0.679267	0.796819	-0.0279703
Leaf_Cluster_C (1155)	Seita.6G098700	-0.417435	-0.652625	-0.799814	-1.01013	-0.949009	-0.953967	-0.696792	-0.824139	-1.07036	-0.267642	-0.782054	-0.279629	2.15674	1.81875	1.38094	1.40878	1.11096	1.35523	0.159704	0.418696	0.134888	-0.0463435	-0.613022	-0.58172
Leaf_Cluster_C (1155)	Seita.6G105500	-1.06047	-0.562757	-0.84009	-0.690558	-0.743868	-0.888808	-1.01341	-0.86685	-0.976421	-0.38883	-0.896515	-0.953418	1.41177	1.58605	2.19016	0.424061	0.387567	0.486717	0.0591846	0.0166044	-0.201979	1.46611	1.3867	0.669055
Leaf_Cluster_C (1155)	Seita.6G105600	-0.714827	-0.779966	-0.677566	-0.541034	-0.653413	-0.527852	-0.55172	-0.886865	-0.545865	-0.769181	-0.763533	-0.759095	2.44018	1.7851	2.24325	0.145463	-0.066919	-0.13356	-0.174469	-0.0545955	-0.371336	-0.0327313	1.05904	1.33149
Leaf_Cluster_C (1155)	Seita.6G107500	-1.09907	-1.08687	-0.815379	-0.838325	-0.381887	-0.652484	-0.326791	-0.786596	-0.589917	-0.83309	-0.967051	-0.914934	0.797266	2.01128	1.92937	0.501549	0.945187	0.434331	-0.667448	-0.511264	0.207937	0.881161	1.54129	1.22173
Leaf_Cluster_C (1155)	Seita.6G113100	-0.41337	-0.622532	-0.891395	-0.443966	-0.632321	-0.566014	-0.905669	-0.795407	-0.634754	-0.817621	-0.852797	-0.776617	2.52458	2.61335	1.30711	0.240263	-0.253034	-0.18021	-0.0246545	-0.0856868	-0.0937778	0.789808	0.860765	0.653952
Leaf_Cluster_C (1155)	Seita.6G113700	-0.555825	-0.159361	-1.16112	-0.750558	-0.300258	-0.454224	-0.663166	-1.09116	-0.972576	-1.2521	-1.35073	-1.10182	2.17871	2.02157	1.05743	0.49434	0.404396	0.728434	0.168423	0.292726	-0.124281	0.895685	0.758639	0.936816
Leaf_Cluster_C (1155)	Seita.6G114000	-0.810353	-0.810353	-0.810353	-0.810353	-0.810353	-0.691829	-0.727353	-0.670837	-0.810353	-0.810353	-0.810353	-0.810353	2.89093	1.78547	1.02072	1.16353	0.835545	0.707602	0.178473	0.120361	0.431266	0.282999	0.282631	-0.316332
Leaf_Cluster_C (1155)	Seita.6G123500	-0.862475	-0.759734	-0.86533	-0.89226	-0.89226	-0.89226	-0.89226	-0.850624	-0.838264	-0.89226	-0.89226	-0.89226	1.92908	1.80055	1.40891	1.26866	1.09589	1.24037	0.373125	0.223009	0.145354	0.497524	0.419018	0.0207411
Leaf_Cluster_C (1155)	Seita.6G159400	-0.442598	0.360892	-0.348203	-1.22087	-1.27681	-0.934238	-1.06562	-1.20679	-1.26555	-0.330341	-0.90101	-0.551842	1.4211	1.01202	1.68051	1.63308	1.16705	0.765241	-0.359747	-0.295743	-0.425112	0.828396	0.75213	1.00406
Leaf_Cluster_C (1155)	Seita.6G165200	-0.690546	-0.690546	-0.690546	-0.690546	-0.690546	-0.690546	-0.646162	-0.690546	-0.690546	-0.690546	-0.690546	-0.690546	2.12969	1.80139	1.25662	1.44717	1.45979	1.5249	0.366202	0.143002	0.0560612	-0.561568	-0.690546	-0.690546
Leaf_Cluster_C (1155)	Seita.6G165300	-0.701582	-0.67568	-0.72554	-0.72554	-0.72554	-0.72554	-0.72554	-0.72554	-0.72554	-0.72554	-0.72554	-0.72554	2.5749	1.90017	1.28871	1.18171	1.20405	1.21481	-0.303377	-0.427555	-0.366351	0.32027	0.182431	-0.137103
Leaf_Cluster_C (1155)	Seita.6G165600	-0.544815	-0.544815	-0.544815	-0.544815	-0.544815	-0.544815	-0.544815	-0.544815	-0.544815	-0.544815	-0.544815	-0.544815	3.42641	1.5809	0.964675	1.10471	1.10288	0.854247	-0.261398	-0.329416	-0.480448	-0.369871	-0.510107	-0.544815
Leaf_Cluster_C (1155)	Seita.6G167400	-0.590501	0.0680784	-0.37764	-0.561263	-0.300888	-0.193555	-0.539529	-0.590544	-0.531992	-1.65378	-1.60176	-2.02109	1.86379	1.80115	1.83041	0.786106	0.164745	0.210144	0.352802	0.417591	0.165655	0.674388	0.221235	0.406457
Leaf_Cluster_C (1155)	Seita.6G179900	-0.726401	-1.0289	-0.573427	-0.548271	-0.684458	0.489006	-0.370697	-0.662208	-0.940261	-1.03875	-0.724597	-0.0769247	2.06023	0.641941	2.71951	0.763848	-0.565709	-0.608269	-0.815074	0.490804	-0.0709283	1.48828	0.0367883	0.744458
Leaf_Cluster_C (1155)	Seita.6G187200	-0.0218249	0.748734	-0.173714	-0.560026	-0.555311	-0.8401	-0.845827	-0.87718	-1.28374	-0.774506	-1.55479	-1.05719	2.58907	1.74779	1.68496	0.647079	0.64433	0.4033	0.0534863	0.233605	-0.134494	0.281478	-0.148068	-0.207062
Leaf_Cluster_C (1155)	Seita.6G189200	0.0337146	0.356105	-0.21549	-0.846528	-0.807806	-0.220338	-0.567569	-0.282666	-0.639397	-0.532977	-0.787451	-0.64582	2.52672	3.06505	1.08014	-0.305236	-0.846528	-0.573844	-0.436221	-0.250244	-0.465601	0.575667	0.191999	0.59431
Leaf_Cluster_C (1155)	Seita.6G197500	-0.49839	0.0693623	-0.661405	-1.27677	-1.17409	-0.782458	-0.309016	-0.369572	-0.961424	-0.934833	-1.45834	-1.16023	1.89186	1.8606	1.04805	0.0862344	-0.157682	0.39791	0.515659	0.554835	-0.100475	1.63318	0.954524	0.832454
Leaf_Cluster_C (1155)	Seita.6G217200	-0.684042	0.0179777	-1.22228	-0.92982	-0.80069	-0.488935	-1.24011	-1.00423	-0.919757	-0.699626	-1.25143	0.0768883	2.2714	1.64882	0.843079	1.0059	0.502637	1.25621	-0.159695	0.303759	-0.406563	1.33571	-0.0378766	0.582675
Leaf_Cluster_C (1155)	Seita.6G221800	-0.365305	-0.136337	-0.623985	-0.172359	0.0894679	-0.119395	-0.858909	-0.922465	-1.11379	-1.08102	-0.927314	-0.924237	2.65935	2.4106	1.53631	-0.116645	-0.187714	0.740073	0.570428	0.167179	-0.21911	0.248202	-0.0276491	-0.625376
Leaf_Cluster_C (1155)	Seita.6G227100	-0.694908	-1.10187	-0.486476	-0.504203	-0.0993046	0.250144	-1.13254	-1.00943	-1.01936	-1.14651	-1.2393	-1.30718	1.49807	1.28872	1.8493	0.782347	0.732282	0.371701	-0.213084	-0.0108258	-0.306827	1.18044	1.21843	1.10038
Leaf_Cluster_C (1155)	Seita.6G237700	-0.482684	0.411978	-0.370645	0.454561	0.780053	0.125424	-0.751666	-0.632214	-1.24738	-1.01328	-1.78739	-1.49698	1.60777	1.18394	1.76366	0.634611	-0.0292906	0.52399	-0.545643	-0.463324	-1.3172	1.28051	0.538204	0.832989
Leaf_Cluster_C (1155)	Seita.6G249100	-0.589248	-0.117131	-1.29836	-1.11697	-1.25872	-1.41748	-0.955065	-0.668573	-0.431263	-0.802754	-1.01306	-1.05944	1.52121	1.93633	0.774534	0.700006	0.805594	1.22711	0.650579	0.890541	0.534465	0.655916	0.491402	0.540374
Leaf_Cluster_C (1155)	Seita.6G254500	-0.336741	0.263973	-0.0196089	0.0130919	-0.162956	-0.483352	-0.782983	-0.782983	-0.782983	-0.782983	-0.782983	-0.782983	1.37088	1.33365	1.77994	1.63411	1.61673	1.93729	-0.739078	-0.65547	-0.684888	-0.738622	-0.713741	-0.717309
Leaf_Cluster_C (1155)	Seita.7G004200	-0.687264	-0.35147	-0.821333	-0.432301	-0.213845	-1.63771	0.130021	-0.519821	-0.65818	-0.77779	-1.57413	-1.39864	1.84276	1.40159	1.33616	1.97211	1.22144	0.258474	-0.268638	-0.0183444	0.162332	0.406268	0.295318	0.332989
Leaf_Cluster_C (1155)	Seita.7G009200	-0.572452	-0.581216	-0.642711	-0.837959	-0.809813	-0.750212	-0.847658	-0.871105	-0.890755	-0.804381	-0.83851	-0.865791	1.64278	1.69381	1.48096	1.56805	1.65682	1.51839	-0.253827	0.268159	0.263191	-0.0952838	-0.377166	-0.0533238
Leaf_Cluster_C (1155)	Seita.7G013000	-0.863956	-0.808461	-0.863956	-0.863956	-0.863956	-0.744305	-0.863956	-0.863956	-0.863956	-0.863956	-0.863956	-0.752388	2.3182	1.84845	0.293248	0.652394	0.528531	1.30513	-0.0409776	0.676046	-0.233354	1.21319	0.964073	0.555834
Leaf_Cluster_C (1155)	Seita.7G020600	-0.669949	0.413419	-0.714846	-0.988206	-0.940825	-0.743986	-0.448341	-0.798971	-0.815889	-0.723854	-0.476246	-0.711367	1.82758	2.14777	1.41137	-0.401633	-0.506799	-0.0919435	-0.298696	-0.17463	-0.408593	1.78335	0.904688	1.4266
Leaf_Cluster_C (1155)	Seita.7G023800	-0.982382	-1.08333	-1.17839	0.356836	0.308796	0.306755	-0.336125	-0.363759	0.289838	-1.84721	-1.67588	-1.85307	0.915857	0.87383	0.832995	0.244304	0.14029	0.625658	0.193179	0.245181	-0.31316	1.36905	1.6078	1.32293
Leaf_Cluster_C (1155)	Seita.7G023900	-0.418972	-0.0795381	-0.385695	-0.240719	-0.315433	-0.433837	-0.988541	-0.814374	-0.968273	0.693668	-0.246165	-0.612715	2.1746	3.1957	0.842936	0.215507	-0.126798	0.252368	-0.851535	-0.819119	-0.54478	-0.292066	1.08208	-0.318311
Leaf_Cluster_C (1155)	Seita.7G030800	-0.867073	-0.585856	-0.968736	-0.309685	-1.02333	-0.0289553	-0.521545	-0.980702	-1.18675	-1.10434	-0.338498	-1.12995	0.600702	1.12198	2.55833	1.10148	-0.208111	0.361902	0.328226	-0.0694008	0.130661	0.000154019	1.66445	1.45506
Leaf_Cluster_C (1155)	Seita.7G038000	-0.94608	-1.66652	-0.92283	-0.10497	0.194443	0.284316	-0.178284	-0.943373	-1.18092	-1.05858	-1.07427	-0.699327	1.7153	0.945596	1.4646	1.69807	1.15628	0.968965	-0.959344	-0.196706	-0.188676	0.893907	0.318198	0.480209
Leaf_Cluster_C (1155)	Seita.7G044900	0.747151	1.38946	1.15122	0.328079	-0.218457	0.424883	-1.33196	-1.67186	-2.24672	-0.118911	-0.964756	-1.03572	-0.546446	0.0580559	0.504925	0.270827	0.038323	-0.10593	0.299796	-0.0898867	-0.468213	1.85421	0.0543956	1.67755
Leaf_Cluster_C (1155)	Seita.7G071800	0.264444	-0.230385	0.249233	-0.494676	-0.384543	-0.395879	-0.808089	-0.572103	-1.06175	-1.87132	-1.5289	-1.62339	1.78831	1.87623	1.72097	0.506182	0.319567	0.260071	0.731951	0.569956	0.725942	0.304294	-0.0368582	-0.309253
Leaf_Cluster_C (1155)	Seita.7G073100	-0.746841	-0.746841	-0.746841	-0.746841	-0.746841	-0.746841	-0.711999	-0.746841	-0.705413	-0.746841	-0.712826	-0.746841	2.5761	1.78247	1.91112	0.869967	0.315486	0.651127	-0.0533566	-0.130878	-0.479082	1.00201	0.642116	-0.235276
Leaf_Cluster_C (1155)	Seita.7G093400	-0.512261	-0.512261	-0.512261	-0.512261	-0.298026	-0.512261	-0.512261	-0.512261	-0.512261	-0.512261	-0.445629	-0.512261	3.13325	2.71556	0.803483	0.196454	-0.2332	1.09432	-0.449253	-0.453266	-0.512261	0.154158	-0.0707233	-0.512261
Leaf_Cluster_C (1155)	Seita.7G093500	-0.584237	0.33671	-0.973931	-0.996966	-0.893574	-1.01586	-0.785944	-0.99963	-1.09571	-1.14246	-1.04585	-1.02372	1.68194	1.67248	1.13952	0.499281	0.258026	1.00674	1.50963	0.952248	0.579314	0.854083	0.0159304	0.0519822
Leaf_Cluster_C (1155)	Seita.7G095500	-0.369739	-0.349934	-0.372053	0.890232	0.740725	0.957865	-1.06281	-0.776572	-0.854381	-1.52618	-1.89221	-1.62407	1.85437	1.77199	0.620819	0.576175	0.602926	0.513334	-0.469785	-0.278135	-0.442244	0.79415	0.19851	0.497025
Leaf_Cluster_C (1155)	Seita.7G098700	-0.514763	-0.401217	-1.09639	0.211389	0.175577	-0.0827303	-1.11185	-1.14606	-1.33991	-1.1625	-1.49093	-1.00758	1.60692	1.04548	0.959248	1.27418	1.24697	0.779219	-0.567241	-0.311162	-0.220574	0.694371	1.22796	1.23159
Leaf_Cluster_C (1155)	Seita.7G102400	-0.130523	-0.554615	-0.909643	0.463562	0.486793	0.514608	-0.959286	-1.48697	-1.61544	-1.17373	-1.68342	-0.792013	1.15977	0.577864	1.15411	1.32569	0.565811	0.139242	-0.627068	-0.169215	-0.101681	1.28367	0.986236	1.54624
Leaf_Cluster_C (1155)	Seita.7G117900	-0.775917	-0.775917	-0.775917	0.506349	-0.775917	1.79461	0.836396	-0.775917	0.928751	-0.775917	-0.775917	-0.775917	0.688086	1.85513	1.26662	-0.775917	-0.775917	-0.775917	1.82776	0.565915	0.59323	-0.775917	-0.775917	-0.775917
Leaf_Cluster_C (1155)	Seita.7G121600	-0.967567	-0.98204	-0.98204	-0.966054	-0.877908	-0.98204	-0.437338	-0.955549	-0.936046	-0.968754	-0.98204	-0.966013	1.59174	1.92298	0.891597	1.03697	1.06453	0.824592	0.224368	0.467148	0.426483	0.975895	0.577967	0.999125
Leaf_Cluster_C (1155)	Seita.7G121700	-0.797219	-0.75815	-0.724731	-0.824926	-0.671447	-0.789117	-0.744415	-0.675006	-0.69073	-0.884096	-0.858243	-0.795953	2.56906	2.20817	1.47677	0.760834	0.672258	0.882773	0.571995	0.0611352	-0.152946	0.176049	0.092303	-0.104364
Leaf_Cluster_C (1155)	Seita.7G125900	-0.488101	0.923774	-0.328005	-0.540162	-0.472589	-0.540162	-0.540162	-0.540162	-0.540162	-0.540162	-0.540162	-0.482544	3.03031	2.71271	1.34397	-0.189526	-0.264712	-0.0799128	-0.540162	-0.410135	-0.485662	-0.334237	0.0292179	-0.18326
Leaf_Cluster_C (1155)	Seita.7G126300	-0.18742	-0.492873	-0.292742	0.167589	-0.602954	-0.812353	-0.801748	0.0171318	-1.35388	-1.01144	-1.35388	-0.43502	1.53979	0.755628	1.65406	-0.153091	-0.676074	-0.0675824	-0.0741998	2.86102	0.166205	-0.486592	0.597012	1.04342
Leaf_Cluster_C (1155)	Seita.7G132000	-0.728989	-0.71413	-0.675646	-0.958651	-0.622737	-0.556337	-0.727664	-0.573014	-0.82827	-0.794832	-0.851451	-0.958651	1.94761	1.70812	1.04947	1.53707	1.90013	1.28905	0.363858	-0.312746	0.372912	-0.27705	-0.304346	-0.283718
Leaf_Cluster_C (1155)	Seita.7G135700	-0.483455	-0.765527	-0.406494	0.3868	0.00603885	0.502366	-1.23003	-0.98185	-0.859398	-1.09482	-1.18975	-1.15142	1.81944	1.79653	1.18595	1.03728	0.528898	0.9727	-0.601405	-0.583469	-1.16793	1.14931	0.869673	0.260551
Leaf_Cluster_C (1155)	Seita.7G140200	-0.852479	-1.26319	-0.950918	-0.544551	-0.321962	-0.282278	-0.955609	-0.719443	-1.04953	-1.26319	-0.802421	-0.824609	2.32952	1.34932	1.59397	0.072223	0.20983	0.792486	1.24141	1.04318	0.536819	0.676103	0.0212425	-0.035916
Leaf_Cluster_C (1155)	Seita.7G141900	0.0327681	-0.889742	-0.0312787	-1.20122	-0.147406	-0.0219049	-1.71278	-0.660579	-0.679072	-0.230674	-0.749449	-1.53542	1.92396	1.66557	1.38367	-0.240961	-0.435588	1.76971	0.826448	0.769701	-0.384148	-0.471031	0.469718	0.549712
Leaf_Cluster_C (1155)	Seita.7G161400	-0.889073	-1.03406	-0.684741	0.18424	-0.149643	0.386412	-0.69477	-0.719531	-1.00911	-1.40865	-1.05363	-1.29856	2.19472	2.35888	0.869463	0.237031	0.308143	0.665072	-0.0855403	-0.162299	1.2389	0.183654	-0.0142401	0.577341
Leaf_Cluster_C (1155)	Seita.7G167900	-1.03472	-1.48634	-1.37181	-0.588973	-0.430264	-0.255625	0.0774863	-0.0827142	-0.293064	-1.11379	-1.51274	-1.36023	1.73792	1.27304	1.3344	0.866948	1.26222	1.25819	0.293335	-0.129275	-0.232635	0.802554	0.744501	0.241589
Leaf_Cluster_C (1155)	Seita.7G168700	0.126656	-0.365176	-0.452594	-1.29498	-1.22533	-0.459631	-0.918407	-0.656304	-0.984654	-1.06346	-1.01025	-1.39042	1.48725	2.00122	1.38137	0.120339	-0.054425	0.702221	0.585433	0.595708	0.00373529	1.69118	0.727101	0.453415
Leaf_Cluster_C (1155)	Seita.7G171000	-0.690074	-0.997478	-0.997478	-0.997478	-0.997478	-0.63974	-0.696915	-0.997478	-0.997478	0.229826	-0.511737	-0.0601538	2.04563	1.91559	1.03248	1.05499	1.50346	0.972093	0.75507	0.642277	-0.355904	-0.621552	0.169657	-0.760143
Leaf_Cluster_C (1155)	Seita.7G171100	-0.715104	-0.715104	-0.627697	-0.421596	-0.715104	-0.706554	-0.614279	-0.592774	-0.715104	-0.478981	-0.490167	-0.599437	2.22056	1.88959	0.940136	1.302	1.5914	1.89203	-0.200731	-0.388327	-0.226526	-0.604175	-0.536513	-0.487546
Leaf_Cluster_C (1155)	Seita.7G178700	-0.612479	-0.746356	-0.686066	-0.66157	-0.746356	-0.746356	-0.746356	-0.746356	-0.595825	-0.746356	-0.681173	-0.597099	2.94575	2.11354	1.03415	1.36533	0.615535	0.483198	-0.34612	-0.261186	-0.23454	0.397942	-0.1093	0.308038
Leaf_Cluster_C (1155)	Seita.7G181100	-0.644809	-0.578184	-0.640695	-0.707148	-0.839657	-0.250529	-0.788366	-0.679875	-0.867102	-1.33071	-1.09941	-1.34076	1.34501	1.34654	1.62204	0.403915	-0.030786	1.10017	1.3684	0.480822	-0.178797	1.52427	1.27698	-0.491311
Leaf_Cluster_C (1155)	Seita.7G204800	-1.30663	-1.34627	-1.02375	-0.571305	-0.484867	0.368208	-0.89431	-0.426351	-0.134262	-0.722792	-0.794559	-0.80152	0.830943	1.18994	1.17674	1.1332	0.52243	0.916247	-0.380156	-0.437086	-1.08011	0.841019	1.01403	2.41119
Leaf_Cluster_C (1155)	Seita.7G207300	-0.904165	-1.09884	-1.18232	0.190636	0.320875	-0.0550749	-0.60805	-0.689645	-0.979578	-1.53368	-1.47817	-1.57349	1.63132	1.6427	1.1352	0.863972	0.806985	0.997073	0.0677744	0.120064	0.215546	0.776505	0.572219	0.76214
Leaf_Cluster_C (1155)	Seita.7G212500	-0.225139	-0.0859903	-0.77574	-0.287876	-0.0198533	-0.455447	-0.227738	-0.415253	-0.312354	-0.583279	-0.719848	-1.38509	2.38185	2.57903	1.44151	-0.655803	-0.94336	-0.769787	-0.274363	-0.460199	-0.282846	1.16521	0.498623	0.813745
Leaf_Cluster_C (1155)	Seita.7G212900	-0.827792	-0.848924	-0.810157	-0.541793	-0.40822	-0.47689	-0.691421	-0.54883	-0.594385	-0.744734	-0.65039	-0.686982	1.39853	1.27651	1.40782	0.00148795	-0.148644	-0.0733658	-0.688504	-0.549839	-0.528431	1.78759	2.09869	1.84867
Leaf_Cluster_C (1155)	Seita.7G216900	-0.275943	-0.98255	-1.07686	-0.162918	0.230297	-0.523326	-0.254446	-0.446741	-1.42263	-1.66593	-1.43835	-1.08498	1.99194	1.90108	0.966518	0.292877	1.40223	0.209853	0.158774	0.680507	0.474021	0.0802007	0.895355	0.051016
Leaf_Cluster_C (1155)	Seita.7G222100	-0.517826	-0.409778	-0.76505	-0.274826	-0.229024	-0.324237	-0.787247	-0.349294	-0.97668	-1.83905	-1.97726	-1.43848	1.68099	1.79766	1.10696	0.388021	0.403824	0.449506	0.629381	0.697672	0.482289	0.940831	0.777804	0.533821
Leaf_Cluster_C (1155)	Seita.7G223700	-0.377513	-0.383497	-0.884649	-0.668638	-1.27629	-0.738504	-1.04461	-0.888497	-0.975928	-0.882277	-1.27292	-0.44548	1.51005	1.80294	1.37128	-0.27384	-0.296852	-0.191091	0.86847	0.847986	0.600064	1.33729	0.926222	1.33629
Leaf_Cluster_C (1155)	Seita.7G223800	-0.28359	-0.613406	-0.441086	-1.00066	-0.997049	-0.915274	-0.450706	-0.462452	-0.827811	-0.919388	-0.716268	-0.75878	2.18869	2.54141	1.82778	-0.160165	-0.51283	-0.26556	0.0543972	0.427836	0.426465	0.624272	0.69125	0.542919
Leaf_Cluster_C (1155)	Seita.7G224500	-0.33952	-1.06513	-0.387945	-0.551862	-0.392996	0.139263	-0.672714	-0.703786	-1.50742	-1.36929	-0.885583	-1.39007	1.36077	2.09603	1.09894	-0.3856	-0.399381	0.0687669	0.857526	0.606899	0.201374	1.29417	1.25374	1.07381
Leaf_Cluster_C (1155)	Seita.7G230100	-0.678997	-0.678997	-0.678997	-0.678997	-0.678997	-0.678997	-0.678997	-0.678997	-0.678997	-0.678997	-0.678997	-0.678997	1.48535	2.40673	2.00958	1.50987	1.37951	0.770483	-0.416399	0.0306204	-0.544585	-0.156742	-0.392777	0.0663272
Leaf_Cluster_C (1155)	Seita.7G230800	-0.264762	-1.45386	-0.880654	-1.24867	0.0361976	-0.596489	-0.490607	-0.842478	-0.789062	-1.1346	-0.842584	-1.22629	1.70362	1.83928	1.49428	0.563406	0.37808	1.07118	0.444873	0.389766	-0.66738	0.730737	0.9004	0.885633
Leaf_Cluster_C (1155)	Seita.7G232500	-0.739	-0.788596	-0.788596	-0.788596	-0.788596	-0.788596	-0.788596	-0.788596	-0.788596	-0.788596	-0.666034	-0.788596	2.15813	1.42159	1.23447	1.67692	1.15959	1.64864	0.616612	0.271657	-0.0905194	-0.23011	-0.158806	-0.417164
Leaf_Cluster_C (1155)	Seita.7G234000	-0.603893	-0.499691	-0.816329	-0.524165	-0.149087	-0.666766	-1.08377	-1.2846	-1.0327	-0.967786	-1.27565	-0.918543	1.79908	2.28746	1.53721	0.620203	0.360879	0.547173	1.08876	0.239767	0.584643	0.630055	-0.0820304	0.209775
Leaf_Cluster_C (1155)	Seita.7G235300	0.418868	0.291727	0.360982	-0.0952665	-0.284025	-0.150352	-0.584922	-0.584922	-0.499991	-0.584922	-0.584922	-0.584922	3.66353	1.34308	1.84052	-0.327174	-0.317201	-0.159099	-0.584922	-0.537229	-0.527898	-0.584922	-0.533786	-0.39223
Leaf_Cluster_C (1155)	Seita.7G240100	-0.569409	-0.665166	-0.576507	-0.326757	-0.426785	-0.546857	-0.385199	-0.410572	-0.665166	-0.665166	-0.393064	-0.665166	2.97048	1.27524	1.16161	-0.665166	-0.665166	-0.393261	-0.0109064	-0.272994	-0.665166	1.84071	1.66337	0.0570683
Leaf_Cluster_C (1155)	Seita.7G240800	0.189755	0.557514	-0.12178	-0.72325	-0.571258	-0.642233	-0.0697983	-0.138877	0.118418	-0.632779	-1.00016	-0.681311	1.98193	1.74128	1.5308	-1.11621	-0.989654	-1.11837	-0.80783	-0.682543	-0.710359	1.15331	1.41601	1.3174
Leaf_Cluster_C (1155)	Seita.7G249700	-0.053246	-0.468033	0.114051	0.49135	0.0839658	0.705447	-1.1252	-0.708138	-0.505536	-2.04463	-1.78179	-1.60862	1.49328	1.23203	1.87391	0.748704	0.392159	0.32514	0.495824	0.0669268	-0.926016	0.73386	0.563392	-0.0988329
Leaf_Cluster_C (1155)	Seita.7G250800	-0.167925	0.112725	-0.531843	-0.327403	-0.526922	-0.64644	-0.873943	-0.534394	-0.869549	-0.954613	-1.02143	-1.22966	2.93668	2.40557	1.20188	-0.0571489	0.183389	0.707225	0.0101096	-0.189084	-0.11739	0.135065	-0.0199153	0.375021
Leaf_Cluster_C (1155)	Seita.7G265200	-0.723146	-0.697954	-0.93643	0.272373	-0.298824	-0.218817	-0.802303	-1.1075	-1.17044	-0.976943	-1.26056	-1.2305	1.67472	2.65546	1.24342	0.628996	0.481929	0.439545	0.163906	0.0423919	0.335016	-0.0791313	0.850045	0.714743
Leaf_Cluster_C (1155)	Seita.7G265800	-0.799121	-0.145099	-0.616854	-1.17368	-0.631704	-0.606441	-1.21499	-0.788711	-1.04871	-1.04773	-1.02012	-1.1304	1.86064	1.87825	0.366113	-0.0348159	0.331179	1.05421	1.33807	1.29256	0.881953	0.429538	0.625797	0.200061
Leaf_Cluster_C (1155)	Seita.7G268900	-0.0926555	-0.0470102	-0.758302	-0.137404	-0.0218251	0.14331	-1.13871	-1.23152	-1.20419	-1.49388	-1.53826	-1.14025	1.91814	1.9358	1.57368	0.878722	0.497844	0.748467	-0.130185	-0.0530615	-0.143408	0.460528	0.450639	0.52354
Leaf_Cluster_C (1155)	Seita.7G269000	-0.395372	-0.601453	-0.6363	-0.163545	0.61189	0.436781	-0.897183	-1.04518	-1.21944	-1.10938	-1.30866	-1.15944	0.957131	1.48425	1.59112	1.8344	1.44735	1.37951	-0.315799	-0.26565	-0.471997	-0.562172	0.262275	0.14685
Leaf_Cluster_C (1155)	Seita.7G276300	-0.543244	0.746016	-0.543244	-0.543244	-0.0944846	-0.186749	-0.543244	-0.543244	-0.543244	-0.543244	-0.543244	-0.543244	2.80338	2.6931	1.16906	-0.104431	-0.0918102	1.21457	-0.543244	-0.543244	-0.543244	-0.543244	-0.543244	-0.543244
Leaf_Cluster_C (1155)	Seita.7G285100	-1.09407	-0.266421	-0.750821	-0.272675	-0.182979	-0.330246	-0.863439	-0.906431	-0.240966	-0.641287	-0.767755	-0.610836	1.97712	3.23952	0.968501	-0.465617	-0.58694	0.388713	0.00822425	1.22989	-0.351672	0.479185	-0.1053	0.146307
Leaf_Cluster_C (1155)	Seita.7G290600	0.0272346	-0.751372	-0.440456	-1.10026	-1.16382	-1.05942	-0.810964	-0.898888	-1.17044	-0.126216	-0.837381	-0.254718	1.88644	0.636455	1.97428	0.924873	-0.0906973	-0.680558	-0.546941	0.175684	0.395992	1.41282	0.981237	1.51711
Leaf_Cluster_C (1155)	Seita.7G298400	-0.724057	-1.19657	-1.03016	-0.605245	-0.388025	-0.693846	-1.11563	-0.82686	-0.441113	-1.01744	-0.924953	-1.19657	1.65344	1.20995	1.67416	0.250925	0.421625	0.657819	0.31544	0.644291	-0.0273576	2.06226	1.00556	0.292346
Leaf_Cluster_C (1155)	Seita.7G301700	-1.08484	-1.54101	-2.10778	-0.691078	0.328266	-0.3724	0.941623	0.482102	0.795882	-0.496484	0.681714	-0.961692	1.87461	2.06522	0.0769367	-0.252278	0.489896	-0.337728	-0.6031	-0.495828	-0.750027	0.304305	0.65641	0.997276
Leaf_Cluster_C (1155)	Seita.7G305300	-0.28287	-0.302587	-0.363125	-0.793829	-0.914026	-0.357454	-1.01602	-1.1819	-1.15408	-1.27424	-1.72859	-1.31565	1.15081	1.71204	1.44982	0.669013	0.783327	0.813883	0.811543	0.677291	0.501414	0.569513	0.896845	0.648866
Leaf_Cluster_C (1155)	Seita.7G322900	-1.07569	0.138487	-0.69446	0.0608855	-0.771497	-0.734571	-0.240206	-1.34317	-0.716544	-1.31685	-1.08932	-1.15605	2.1957	1.26728	1.55179	1.3967	1.07845	0.981003	0.0831196	0.138993	-0.460824	-0.132227	0.579394	0.259623
Leaf_Cluster_C (1155)	Seita.7G323700	-1.14191	-0.0186138	-0.0417271	-0.0387509	-0.882513	-0.172112	0.638865	-0.809696	-1.09326	-0.859813	-1.1085	-0.906326	2.32224	1.45644	2.20336	0.90306	0.641947	-0.018697	-0.809089	-0.767517	-0.514185	0.104154	0.0668306	0.845816
Leaf_Cluster_C (1155)	Seita.8G005600	-0.347655	-0.867527	-0.452075	-0.296204	-0.765971	-0.593498	1.72401	-1.0588	-0.821233	-1.11615	-0.886574	0.0839635	0.830697	1.2678	1.66709	1.50655	1.66801	0.906177	-0.745047	-0.652089	-0.443104	0.899547	-0.844878	-0.663039
Leaf_Cluster_C (1155)	Seita.8G010700	-0.266759	-0.106439	-0.406942	0.397511	0.452434	0.00124627	-1.37164	-1.19218	-1.36972	-0.833141	-1.0194	-0.995916	2.28539	2.12961	1.19717	0.183323	0.0598404	0.198443	-0.412811	-0.781941	-0.594869	0.922771	0.947285	0.576737
Leaf_Cluster_C (1155)	Seita.8G033000	-0.761987	0.219646	-0.193817	-0.158782	-0.35814	-0.485182	1.65004	-0.857357	-0.857357	-0.537197	-0.765335	-0.541858	1.69451	1.70734	3.00465	0.0301778	-0.549256	-0.857357	-0.0434477	-0.0308515	-0.564984	-0.482955	-0.39753	0.137038
Leaf_Cluster_C (1155)	Seita.8G072300	-0.796289	0.523154	-0.247479	-0.0243766	0.502228	0.383649	-1.01604	-1.23793	-1.82912	-0.379874	-1.7751	-0.431152	1.33028	1.28641	1.31675	1.83199	0.833569	-0.412134	-1.01791	0.781788	-0.280739	0.660878	-0.59168	0.589141
Leaf_Cluster_C (1155)	Seita.8G072900	-0.877834	0.108816	-0.728582	-0.724439	-0.614855	-0.535678	-0.632351	-0.713088	-0.890331	-0.959944	-0.989922	-0.989922	2.33625	1.90244	1.6598	1.05086	0.957975	0.269553	0.619473	0.596701	0.674588	-0.395885	-0.610174	-0.513449
Leaf_Cluster_C (1155)	Seita.8G073000	-0.701883	-0.272775	-0.615867	-0.654474	-0.383807	-0.292914	-0.701883	-0.549112	-0.611244	-0.701883	-0.591193	-0.701883	2.92752	1.60562	1.86741	1.40866	0.148671	-0.427326	0.564352	0.665418	-0.0134249	-0.701883	-0.564202	-0.701883
Leaf_Cluster_C (1155)	Seita.8G099100	-0.701019	-0.591953	-0.814397	0.0212421	-0.186866	0.0800851	-1.01471	-1.05835	-0.915785	-1.37161	-1.15659	-1.15405	1.93295	1.70259	1.23629	1.4012	1.27935	1.41615	0.179207	-0.108286	-0.129694	0.219122	-0.109595	-0.155271
Leaf_Cluster_C (1155)	Seita.8G099200	0.121546	-0.658939	-0.108862	0.429864	0.381499	0.231252	-1.46558	-1.01701	-1.75893	-1.5657	-1.53839	-1.06284	1.37393	1.02549	0.93972	1.41514	1.05938	1.21404	-0.415086	0.210803	-0.428354	0.931716	0.403152	0.282152
Leaf_Cluster_C (1155)	Seita.8G102500	-0.224913	-0.282267	-0.351249	-0.608165	-0.608165	-0.608165	-0.608165	-0.608165	-0.490147	-0.608165	-0.608165	-0.608165	1.5198	3.12967	2.46535	-0.324163	-0.0993876	0.580185	0.134071	0.390298	-0.411266	-0.432122	-0.130375	-0.608165
Leaf_Cluster_C (1155)	Seita.8G107500	-0.579669	-0.759667	-0.60103	-0.759667	-0.759667	-0.542558	0.413918	-0.0466845	-0.254491	-0.759667	-0.672461	-0.457951	0.844066	2.26851	0.989542	-0.573858	0.0670947	-0.2659	0.18973	1.72317	2.6536	-0.759667	-0.597023	-0.759667
Leaf_Cluster_C (1155)	Seita.8G115200	-0.845317	-0.845317	-0.845317	-0.845317	-0.845317	-0.845317	-0.781866	-0.816105	-0.845317	-0.845317	-0.783549	-0.845317	2.03628	1.38743	1.69721	1.42019	1.32787	1.21236	-0.0335491	0.0658853	0.170463	0.555072	0.321923	-0.171755
Leaf_Cluster_C (1155)	Seita.8G115600	0.418974	-0.847536	-0.768623	-0.765475	0.881287	-0.893616	-0.774705	-0.218191	-0.799173	-0.900023	-0.766937	-0.807458	2.39224	1.68536	1.42534	0.571848	-0.790596	0.946821	-0.783148	0.737007	-0.75217	-0.765568	0.90236	0.671992
Leaf_Cluster_C (1155)	Seita.8G116500	0.480186	-0.500969	-0.150792	-0.65862	-0.65862	-0.571542	-0.65862	-0.155016	-0.57448	-0.65862	-0.65862	-0.65862	1.89597	3.11815	1.43783	-0.65862	-0.277146	-0.339955	-0.65862	0.304484	-0.65862	-0.624151	1.13585	0.749158
Leaf_Cluster_C (1155)	Seita.8G131600	-0.511277	-0.577114	-0.974488	0.111146	-0.00734602	0.352024	-0.110541	-0.197755	-0.485938	-1.03827	-1.03827	-1.03827	2.20772	2.45922	-0.0171137	0.167665	0.371858	1.09732	1.31463	0.43339	0.596199	-1.03827	-1.03827	-1.03827
Leaf_Cluster_C (1155)	Seita.8G139100	-1.03204	-0.367077	-1.88693	-1.48344	-1.19894	-0.975847	-0.103884	-0.0146023	-1.43512	0.228154	0.23413	0.174025	1.77968	1.47404	0.64324	1.18052	1.73367	1.07962	-0.129365	0.226541	0.0144284	0.130411	-0.15677	-0.114434
Leaf_Cluster_C (1155)	Seita.8G141500	-0.384391	-0.518055	-0.367561	-0.343418	-0.501699	-0.18406	-1.0776	-0.999084	-1.33556	-0.713485	-1.46142	-1.03541	2.09755	1.13537	1.5997	0.188579	0.125276	-0.126158	-0.307804	0.397845	-0.250915	1.72952	1.31151	1.02127
Leaf_Cluster_C (1155)	Seita.8G141900	-0.638276	-0.909186	-0.104176	-1.08847	-0.476013	0.400712	0.518853	-0.440876	-0.973973	-0.97402	-0.910456	-1.63337	2.01967	1.60998	2.67315	0.061828	-0.303716	0.367698	0.372147	0.00868501	-0.150225	0.247799	0.199176	0.123051
Leaf_Cluster_C (1155)	Seita.8G161700	-0.151469	-0.523837	-0.473665	-0.0123292	-0.360038	-0.195002	-1.20973	-0.919654	-1.14072	-1.95531	-1.63896	-1.05636	1.98336	1.56812	0.80187	0.764642	0.938479	0.772355	-0.178971	0.610278	0.343256	0.724547	0.845481	0.463648
Leaf_Cluster_C (1155)	Seita.8G166700	-0.414531	-0.648351	-0.419864	1.27114	0.451948	1.47569	-0.830508	-0.817458	-0.802538	-0.854336	-0.8609	-0.840385	1.50504	1.48913	1.53069	1.17905	1.18614	0.968481	-0.679537	-0.756302	-0.829328	-0.792874	-0.793417	-0.716979
Leaf_Cluster_C (1155)	Seita.8G167700	-0.0944674	0.0799031	0.241498	-0.381159	-0.360026	-0.388084	-0.152646	-1.0109	-0.632515	-1.51127	-1.35264	-1.34904	1.32171	1.31724	1.50561	1.43386	1.53786	1.86409	0.1138	-0.156788	-0.0264605	-0.839644	-0.404641	-0.755286
Leaf_Cluster_C (1155)	Seita.8G170100	-0.706826	0.110423	-0.461104	0.655899	0.166049	0.735155	-0.82458	-0.529742	-1.09184	-0.731142	-0.997819	-0.899259	1.44438	1.32846	1.24431	2.27858	1.37989	1.0661	-0.848122	-0.420288	-0.656585	-0.466873	-1.01686	-0.758206
Leaf_Cluster_C (1155)	Seita.8G187000	-0.676094	-0.599649	-1.19362	-0.36313	-0.603882	-0.386085	-0.668226	-0.86554	-1.13752	-0.978658	-1.21683	-1.15011	2.29057	2.01711	0.718725	0.848249	1.10136	0.981687	-0.0663003	-0.114976	0.685297	0.363197	0.495907	0.51851
Leaf_Cluster_C (1155)	Seita.9G005600	-0.153503	-0.243866	0.298568	-0.316659	0.402552	0.121771	-0.910998	-0.729082	-0.910998	-0.755948	-0.848425	-0.83826	1.14805	2.77528	1.99657	-0.766138	-0.685386	-0.388515	-0.807593	-0.0326388	-0.396545	-0.241274	1.72303	0.560008
Leaf_Cluster_C (1155)	Seita.9G014100	-0.846821	-0.527449	-0.60792	-0.617854	-0.96108	-0.495133	-0.709211	-0.832048	-0.811514	-0.959088	-0.902174	-1.09725	2.05211	1.78367	1.60741	0.537054	1.63912	0.357915	0.967594	0.406868	0.598747	-0.70739	0.412159	-0.287718
Leaf_Cluster_C (1155)	Seita.9G037500	-0.701754	-0.719211	-1.09712	-0.601575	-0.64113	0.187148	-0.660073	-0.555089	-1.41474	-0.984295	-1.29996	-0.626849	2.28634	0.672755	1.56093	1.96096	0.663179	0.381141	0.1187	-0.0679347	-0.263743	1.11307	0.157479	0.531779
Leaf_Cluster_C (1155)	Seita.9G043000	-0.85397	-0.687356	-0.905831	-0.905831	-0.874825	-0.874262	-0.905831	-0.833845	-0.847333	-0.905831	-0.905831	-0.905831	2.16431	1.79583	0.835334	0.808818	0.331061	1.54345	1.09041	0.781069	0.399389	0.00442395	0.388218	0.264276
Leaf_Cluster_C (1155)	Seita.9G044000	-0.0303639	-0.291556	-0.511918	-0.255594	-0.104875	-0.163469	-0.731055	-0.615298	-0.731055	-0.731055	-0.731055	-0.731055	1.34999	2.57282	2.06566	1.71974	0.987133	0.644059	-0.731055	-0.704456	-0.731055	-0.484692	-0.328742	-0.731055
Leaf_Cluster_C (1155)	Seita.9G044600	0.0911737	-0.0587707	-0.0938116	-0.575912	0.0237362	-0.300658	-0.734629	-0.734629	-0.734629	-0.734629	-0.734629	-0.734629	1.37205	1.99624	1.89617	1.42676	1.36436	1.65701	-0.734629	-0.734629	-0.734629	-0.727078	-0.734629	-0.724976
Leaf_Cluster_C (1155)	Seita.9G045000	-0.65437	-0.681367	-0.692286	-0.715364	-0.639632	-0.647776	-0.715364	-0.624976	-0.679352	-0.715364	-0.576355	-0.715364	2.36781	1.14812	0.584369	-0.255222	-0.463606	-0.287385	-0.175597	0.23852	-0.369735	2.24299	1.73913	1.28819
Leaf_Cluster_C (1155)	Seita.9G047900	-0.00789343	-0.0477192	0.459848	-0.876086	-0.263748	-0.29209	-0.642358	-0.584774	0.124336	-1.32488	-1.06187	-1.27684	2.29941	2.56289	1.85042	-0.449771	-0.652947	0.227445	-0.204391	-0.169696	-0.220749	-0.290732	0.245078	0.597128
Leaf_Cluster_C (1155)	Seita.9G049100	-0.572919	-0.0259864	-0.826457	-0.784671	-0.945682	-0.873338	-0.814125	-0.945682	-0.789875	-0.945682	-0.945682	-0.945682	1.64117	2.37215	1.22095	0.180577	-0.195293	1.46952	0.460137	0.302178	0.240966	1.54139	0.258808	-0.0767672
Leaf_Cluster_C (1155)	Seita.9G051700	-0.924991	0.0141668	-1.15372	0.288749	0.0204178	0.423228	-0.832127	-0.583272	-0.888665	-1.29959	-1.54556	-1.45965	0.891058	0.953023	1.15134	-0.0798142	-0.184674	0.0757482	-0.243282	-0.0749823	0.221473	2.10108	1.66139	1.46865
Leaf_Cluster_C (1155)	Seita.9G051800	-0.78798	-0.38202	-0.396309	-0.709601	-0.704651	-0.595764	-1.02494	-0.832074	-1.1618	-0.903483	-0.569953	-0.67054	2.00988	1.0534	1.48461	0.0969641	0.141524	0.43485	-0.89312	-0.196685	-0.144306	1.64094	1.75131	1.35974
Leaf_Cluster_C (1155)	Seita.9G053500	-0.115946	-0.234177	-0.265739	0.371638	0.472134	0.177596	-0.0723161	-0.161722	-0.803195	-0.949865	-1.4592	-2.15387	1.42028	1.37556	1.24104	-0.666654	-0.547685	-0.253599	-0.882846	-0.483686	-0.438841	1.58754	1.20505	1.63851
Leaf_Cluster_C (1155)	Seita.9G056300	-1.15887	-0.539458	-1.45753	-0.217777	-0.189205	-0.318291	-0.881024	-0.740366	-0.705019	-1.42952	-1.27386	-1.43613	1.87992	1.70186	0.895497	0.976721	0.835812	1.0181	0.565169	0.348407	0.48549	0.637723	0.502505	0.499851
Leaf_Cluster_C (1155)	Seita.9G057200	-1.2253	-1.26946	-1.88974	0.100305	0.466676	0.0149931	0.0592221	-0.644421	-1.48104	-0.838582	-1.06044	-0.648134	0.568876	2.05879	1.43497	0.255308	-0.0913134	1.26829	-0.474974	0.603769	0.887554	0.426962	1.10791	0.369796
Leaf_Cluster_C (1155)	Seita.9G057800	-0.518865	-0.518865	-0.518865	-0.518865	-0.518865	-0.518865	-0.518865	-0.518865	-0.518865	0.0959864	-0.518865	-0.518865	3.01266	2.07878	1.90863	-0.518865	-0.518865	-0.518865	1.05844	-0.482138	-0.518865	0.52931	-0.518865	0.100178
Leaf_Cluster_C (1155)	Seita.9G057900	0.332013	-0.709792	-0.833751	-0.685883	-0.842527	0.362686	0.0437956	-0.0985731	-0.846349	-0.304076	-0.767253	-0.405797	2.03657	1.84319	2.05355	-0.733176	-0.679108	-0.729263	1.26944	-0.82981	-0.706244	1.27901	-0.758066	0.709408
Leaf_Cluster_C (1155)	Seita.9G060800	-0.930583	-1.11683	-1.37354	-1.19753	-0.787893	-1.31438	0.872255	0.400044	-0.432782	1.47881	0.636947	0.0763495	0.473569	1.77157	2.26756	0.677135	-0.446715	0.29006	-0.434903	-0.475708	-1.07138	0.81227	-0.201198	0.0268643
Leaf_Cluster_C (1155)	Seita.9G062100	-0.465675	0.211495	-0.603747	-0.858362	0.381089	-0.55202	-0.295373	-0.225689	-0.596531	-0.883016	-0.611749	-0.867524	3.28008	1.88633	1.75347	0.616922	-0.0435587	-0.251823	-0.388686	-0.459469	-0.61497	0.151002	-0.398602	-0.1636
Leaf_Cluster_C (1155)	Seita.9G077100	-1.461	-0.826019	-1.20121	-1.26012	-0.74321	-1.29623	-0.0907833	-0.734953	-1.38199	1.51544	0.181797	-0.101372	1.69176	1.40454	1.15824	-0.121199	-0.248092	0.546466	0.854431	0.670257	0.691554	-0.652081	1.20308	0.200696
Leaf_Cluster_C (1155)	Seita.9G089800	-0.0340175	-0.324183	-0.757878	-1.13324	-0.593992	-0.338284	-0.793176	-0.950984	-1.242	-0.945943	-0.923668	-1.43463	2.11299	1.58565	0.691151	0.498549	0.269072	1.84013	0.369706	0.512573	-0.379824	1.21651	0.70407	0.05143
Leaf_Cluster_C (1155)	Seita.9G091100	-0.442064	0.207209	-0.861399	0.0519143	-0.881506	-0.389251	-0.972061	-0.789418	-0.602799	-1.58086	-1.13271	-1.13085	1.82705	1.83337	0.591525	0.401842	2.01047	0.721389	-0.594917	0.825564	-0.392822	0.0247747	1.03708	0.238454
Leaf_Cluster_C (1155)	Seita.9G091800	-0.824651	-0.841946	-0.850707	-0.891293	-0.864391	-0.748201	-0.848713	-0.797121	-0.842269	-0.869335	-0.891293	-0.891293	1.26383	1.24172	1.20808	-0.268475	-0.27224	0.47528	1.2584	0.613326	0.0207755	1.82746	1.7169	1.07616
Leaf_Cluster_C (1155)	Seita.9G095400	-0.269126	-0.553921	-0.78109	-0.522452	-1.13089	-0.950518	-0.62952	-0.509067	-0.801213	-0.977973	-0.925945	-0.960719	1.64896	2.53662	1.47861	0.869375	0.790309	1.17855	0.763221	0.287639	-0.340856	0.559483	-0.259136	-0.500347
Leaf_Cluster_C (1155)	Seita.9G096500	-1.55252	-0.213174	-1.75884	0.501578	0.37376	0.00428474	-0.015483	-0.291489	-0.408791	-0.828291	-0.747108	-0.972474	1.93529	1.76461	0.535058	0.891018	0.272919	0.418396	-0.915206	-1.16029	-0.837141	1.54315	0.511985	0.948746
Leaf_Cluster_C (1155)	Seita.9G097300	-0.343447	-0.901433	-0.614729	0.0933277	0.0557581	0.742913	-1.15536	-0.608467	-0.691045	-1.87841	-1.715	-1.62803	1.42965	1.20533	0.992301	0.169677	-0.324888	0.762989	1.25477	0.900192	-0.222359	1.0831	0.853749	0.539407
Leaf_Cluster_C (1155)	Seita.9G097700	-0.340964	-0.155526	-1.08324	0.0416591	-0.62072	0.0571644	-1.3559	-0.684164	-1.52441	-1.20109	-1.05468	-1.21008	2.17105	2.04948	1.05724	0.406788	0.426018	0.528799	0.00658161	0.122581	0.488413	0.0933077	1.15395	0.627747
Leaf_Cluster_C (1155)	Seita.9G111300	0.296511	0.134896	-0.467642	0.568575	0.397949	0.362347	-1.13651	-0.769245	-1.18651	-1.36507	-1.36171	-1.2965	2.41985	2.26	1.11534	0.260263	-0.238133	0.0758824	0.158407	-0.757601	-0.102509	0.600509	-0.163943	0.194836
Leaf_Cluster_C (1155)	Seita.9G112100	-0.949827	-0.802451	-0.818403	-0.96864	-0.918738	-0.96864	-0.934334	-0.937527	-0.852582	-0.96864	-0.96864	-0.770458	2.19995	1.60814	1.00209	0.974467	0.938971	1.00779	0.667057	0.457232	0.182682	0.70517	0.682044	0.433286
Leaf_Cluster_C (1155)	Seita.9G112400	-0.510372	0.35522	-0.6279	-0.995782	-0.814145	-1.15518	-0.794192	-0.398923	-1.00547	-1.15058	-1.60034	-1.52308	1.91976	1.54311	1.24938	0.664206	0.342541	0.664883	0.81261	0.419478	0.599069	0.824355	0.700145	0.481207
Leaf_Cluster_C (1155)	Seita.9G118300	-0.376937	-0.378021	-0.717358	-0.795582	-1.069	-0.941384	-0.154994	-0.33396	0.19589	-0.578113	-0.638601	-0.586213	3.08018	2.48922	1.34663	0.27612	0.180434	0.292192	-0.214883	0.123766	-0.22118	-0.117235	-0.215104	-0.645867
Leaf_Cluster_C (1155)	Seita.9G120700	-0.138922	-0.221672	-1.37368	-0.841319	-0.663341	-0.263846	-1.39325	-0.962092	-1.66852	-0.481014	-1.3763	-0.39231	1.92498	1.71871	0.881147	0.728023	0.713166	1.14216	0.918695	0.789301	0.535115	0.586773	-0.0214458	-0.140364
Leaf_Cluster_C (1155)	Seita.9G121000	0.381307	0.529108	-0.0113405	-1.38396	-1.92822	-1.98126	-0.141892	-0.0184568	-0.132715	-0.0407166	-0.0755693	0.207876	1.62415	1.70121	0.860635	-1.15717	-1.08068	-1.24908	0.65689	0.763384	0.790492	0.571437	0.573072	0.541501
Leaf_Cluster_C (1155)	Seita.9G124000	-0.28211	-0.372359	-0.535519	-0.254067	-0.30638	-0.125442	-1.3656	-1.11953	-0.961771	-1.90943	-1.93139	-0.871519	1.75478	1.34392	0.518906	0.858233	0.598201	0.276457	0.455534	0.816916	0.812455	0.78253	1.00348	0.813713
Leaf_Cluster_C (1155)	Seita.9G134900	-0.791292	-0.663705	-0.772764	-0.922045	-0.805462	-0.920695	-0.836417	-0.956227	-0.880557	-0.978892	-1.00493	-1.06715	2.00987	1.73727	1.42527	1.04716	1.09646	1.15213	0.271177	0.285963	0.383506	0.356172	0.423822	0.411329
Leaf_Cluster_C (1155)	Seita.9G158000	-0.690156	-0.772375	-0.323553	-0.877544	-0.871405	-0.873528	-0.23708	-0.564654	-0.886251	-0.790667	-0.918811	-0.314657	2.55349	2.36702	1.97843	0.595051	0.200203	0.421035	0.119261	-0.223283	-0.172437	0.303164	-0.0674362	0.0461893
Leaf_Cluster_C (1155)	Seita.9G159500	-0.666945	-0.546302	-0.88231	-0.682419	-0.449443	-0.577745	-0.858539	-0.883517	-0.961929	-0.961929	-0.797965	-0.961929	2.30522	1.76538	0.932834	-0.0627034	-0.14373	0.452393	1.30699	1.47999	0.089746	1.43326	-0.136055	-0.192351
Leaf_Cluster_C (1155)	Seita.9G161600	-1.00657	-0.297021	-0.821412	-0.458131	-0.571821	-0.474274	-0.454924	-0.971613	-1.45386	0.131904	-0.529156	-0.507149	2.18693	2.33212	1.53709	0.282447	0.109987	0.503301	-0.388177	-0.673992	-0.703492	1.52415	0.498556	0.205101
Leaf_Cluster_C (1155)	Seita.9G161900	-0.704119	-0.659675	-0.780113	-0.58815	-0.468355	-0.160036	-0.819561	-0.699529	-0.810484	-0.725514	-0.820701	-0.812212	2.79857	1.72505	1.13021	-0.563453	-0.739168	-0.499153	0.429258	0.218277	0.756391	1.14734	1.3326	0.312541
Leaf_Cluster_C (1155)	Seita.9G170500	-0.667223	-0.651616	-0.294738	-1.19308	-1.07128	-1.10285	0.170203	0.144773	-0.59719	-0.714322	-0.310501	-0.393796	0.955585	1.17332	1.44932	-1.19308	-1.06072	-1.19308	0.626865	0.715726	0.707011	0.884872	1.79755	1.81826
Leaf_Cluster_C (1155)	Seita.9G171600	-0.0840058	-0.58105	-0.118927	-0.870201	-0.756714	-0.609653	-0.106087	-0.383781	-0.486163	-0.778265	-0.870201	-0.766843	1.61923	1.83825	1.98921	-0.82282	-0.870201	-0.767159	2.17419	0.290808	1.13712	0.390447	0.0286056	-0.595783
Leaf_Cluster_C (1155)	Seita.9G186600	-0.107328	-0.842405	-0.533969	-1.09998	-0.895559	-1.00036	-0.157224	-0.932917	-1.25716	-0.854076	-0.346562	-1.11514	2.66348	1.30396	1.65098	0.605384	0.782849	0.0771078	0.0689745	0.120911	-0.366047	0.939671	0.522101	0.773317
Leaf_Cluster_C (1155)	Seita.9G186800	-0.372358	-0.353783	-0.485315	-0.233571	-0.859451	-0.299956	-0.389884	-1.12071	-0.36854	-1.17994	-0.871688	-1.03245	2.23408	2.14186	1.86414	1.21432	0.450221	-0.422418	-0.284626	-0.421413	-0.842324	0.519766	0.347991	0.766044
Leaf_Cluster_C (1155)	Seita.9G188100	-0.763346	-1.49167	-0.674024	0.686185	0.513344	0.750858	-1.03798	-0.387231	-0.385969	-1.78259	-1.97257	-1.46317	1.24169	1.28398	1.09313	0.259415	-0.0479036	0.634117	0.177044	0.0298121	0.507676	1.08381	0.939939	0.805461
Leaf_Cluster_C (1155)	Seita.9G208200	-0.846224	-0.664	-0.743039	-0.313791	-0.438824	-0.322528	-0.95748	-0.69281	-0.935147	-1.49575	-1.43676	-1.52855	1.76019	1.5053	1.15463	0.291766	0.299351	0.385165	0.484467	0.39947	0.507016	1.06783	1.26229	1.25742
Leaf_Cluster_C (1155)	Seita.9G210000	-0.827917	-1.06239	-0.679309	-0.179971	0.0735231	-0.131812	-0.511491	-1.00761	-1.04474	-0.628468	-1.2479	-0.638608	1.12373	0.970951	1.54329	2.07882	0.388676	0.918095	-0.836554	-0.110108	-1.04839	1.95203	0.508075	0.398082
Leaf_Cluster_C (1155)	Seita.9G214500	-0.740054	0.0477165	-0.43362	-0.251123	-0.878527	0.941378	-0.406866	-0.805938	-0.78433	-0.675087	-0.431855	-0.509247	0.641863	1.60132	1.01392	0.735239	0.0207107	0.17037	-0.83497	-0.812685	-0.598755	3.42608	-0.424928	-0.0106168
Leaf_Cluster_C (1155)	Seita.9G234300	-0.421538	-0.697805	-1.03215	0.301609	0.176234	-0.0695167	-1.44637	-0.791148	-0.712905	-1.65175	-1.98341	-1.20726	1.52257	1.11544	0.655928	1.14468	1.01642	0.990132	0.181094	0.284507	0.029264	0.977016	1.03448	0.584475
Leaf_Cluster_C (1155)	Seita.9G237100	-1.47745	-1.94319	-0.276744	-0.655794	-2.15358	0.543398	-0.300961	0.695383	0.113017	0.381508	0.0650113	1.15005	1.48602	1.36208	0.644089	0.916214	-1.78175	0.0743158	0.0641116	-0.369427	0.706405	0.551348	0.302064	-0.0961253
Leaf_Cluster_C (1155)	Seita.9G239000	-0.96616	-1.35943	-0.744383	-0.159951	-0.25586	-0.297463	-1.26748	-1.73589	-0.962989	-0.0561098	-0.222454	0.0199435	1.90709	1.23228	0.915085	0.723092	0.858732	0.736149	-1.17945	-0.337392	-0.421394	1.33579	1.36188	0.876365
Leaf_Cluster_C (1155)	Seita.9G250300	-1.04182	-0.739782	-1.14416	0.591525	0.387698	0.438041	-0.432462	-0.5097	-0.282788	-1.39085	-1.3328	-1.12607	1.41488	1.29937	0.90799	0.166343	0.251184	0.327546	-0.902428	-0.559561	-0.943637	1.46974	1.6141	1.53764
Leaf_Cluster_C (1155)	Seita.9G251600	-0.897658	0.712859	0.108721	-0.0940857	-0.480975	-0.203393	1.37092	-0.00996886	-1.5623	-0.152101	-1.06696	-0.255334	2.22858	1.53655	2.1328	0.596376	0.478015	-1.21312	-0.45216	-0.563359	-0.438102	-0.812287	-0.676686	-0.286332
Leaf_Cluster_C (1155)	Seita.9G253700	-0.831848	-0.649281	-0.366626	-0.855679	-0.0518468	-0.717039	-0.131113	-0.388375	-0.394031	-0.928828	-1.02329	-0.952027	2.13457	2.6225	1.46791	-0.7458	-0.662398	-0.171282	1.21894	0.937475	-0.317218	0.386976	0.0541987	0.364116
Leaf_Cluster_C (1155)	Seita.9G262500	-0.169502	-0.311564	-0.323293	-1.12237	-1.1623	-1.1623	-0.213174	-0.600878	-0.220426	-0.762796	-0.00700065	-0.718454	1.56966	1.72847	1.69814	-1.1046	-1.12577	-1.02688	0.250552	0.561056	0.476486	1.00135	1.39905	1.34653
Leaf_Cluster_C (1155)	Seita.9G264900	-0.439181	-0.228418	-0.516527	-0.303001	-0.666993	-0.659258	-0.413008	-0.124576	-0.719519	-1.32309	-0.317391	-1.20978	2.44119	2.47261	1.46747	-0.327645	0.277939	-0.195067	-0.562953	-0.561377	-0.522263	0.737849	1.13502	0.557976
Leaf_Cluster_C (1155)	Seita.9G270900	-0.635663	-0.739216	-0.772856	-0.0707293	-0.448395	-0.40214	-0.753496	-0.764778	-0.597258	-0.750888	-0.756741	-0.60522	3.06647	1.95111	0.87981	0.586054	0.0453669	-0.424875	-0.744172	-0.575807	-0.207714	1.22353	0.835913	0.661694
Leaf_Cluster_C (1155)	Seita.9G272300	-1.02036	0.139426	-0.448941	-0.260716	-0.112358	-0.114868	0.0551356	-0.18006	-0.658012	-0.109604	-1.74103	-0.737035	3.00081	2.23061	1.31668	0.128654	-0.0392085	-0.40343	-0.716545	-0.854128	-0.342186	0.433744	0.0553232	0.378099
Leaf_Cluster_C (1155)	Seita.9G282800	-0.564858	0.129575	-1.05649	0.528329	0.557633	0.197621	-0.56158	-0.620013	-1.03282	-0.23274	-0.74567	-0.362562	2.77035	2.21745	1.02985	0.252901	0.201443	-0.127848	-1.26189	-1.04321	-1.25055	0.299951	0.144066	0.531062
Leaf_Cluster_C (1155)	Seita.9G308000	-0.234329	0.421213	-0.138497	-0.908769	-0.938471	-0.8015	-0.881458	-0.918425	-1.02593	-1.43498	-1.96017	-1.30373	1.51031	1.25623	1.21403	0.740687	0.902313	0.638505	0.836036	1.12503	0.543446	0.689694	0.511229	0.157529
Leaf_Cluster_C (1155)	Seita.9G314200	-0.513928	-1.75796	-0.625784	-1.15512	-0.823963	-0.142579	-0.520762	-0.530341	-0.621507	-0.818181	-0.659879	-1.52836	1.07372	1.16014	1.98023	0.415142	0.749577	1.03401	0.392084	-0.416791	-0.197574	1.15778	0.901987	1.44805
Leaf_Cluster_C (1155)	Seita.9G327500	-0.463531	-1.10969	-0.942619	0.384212	0.383835	0.216164	-1.1396	-1.03106	-0.780713	-1.56397	-1.23	-1.41275	1.89859	1.08328	1.23987	1.05214	0.57959	1.05143	-0.138703	-0.294522	-0.204939	1.24254	0.859505	0.32095
Leaf_Cluster_C (1155)	Seita.9G328100	-0.396955	0.939705	-0.609547	-0.815255	-0.8137	0.0669882	0.155981	0.0656912	0.372016	-0.814955	-0.684431	-0.964277	2.23326	3.0184	1.31416	-0.964277	-0.339332	-0.348391	-0.229459	-0.372316	-0.662178	0.228658	0.185232	-0.565016
Leaf_Cluster_C (1155)	Seita.9G339800	-0.668952	-0.902851	-1.19575	-1.22051	-0.830794	-1.02282	-0.241892	-0.325738	-0.195924	-0.596576	-0.892092	-0.878382	2.61017	2.19393	1.17859	0.716345	0.329344	0.693104	0.293563	0.130614	-0.277049	0.168628	0.777503	0.157535
Leaf_Cluster_C (1155)	Seita.9G341500	-0.0780678	-0.304823	-1.21565	-0.188365	-0.193306	-0.416828	-0.892018	-0.283576	-0.7217	-1.86378	-1.17403	-1.24011	2.34825	2.34283	0.748838	0.534407	0.382337	0.55343	-0.196578	0.216576	-0.0436759	0.748485	0.44835	0.489002
Leaf_Cluster_C (1155)	Seita.9G348300	-0.928292	-0.392743	-0.813643	-0.697356	-0.767094	-0.694701	-0.535268	-0.871985	-0.933758	-0.933758	-0.755333	-0.933758	1.79623	1.72704	0.836312	1.19178	1.3519	1.9235	0.606857	0.857248	0.0498374	-0.0508725	-0.385107	-0.64704
Leaf_Cluster_C (1155)	Seita.9G348700	-0.857335	-0.611152	-1.0791	-0.137773	-0.0430437	-0.185581	-1.42387	-0.455812	-0.537798	-1.23382	-1.08775	-1.10763	1.74572	2.24858	0.434019	-0.391804	-0.0264375	0.37174	0.323288	0.25776	-0.0539693	1.84288	1.15052	0.858362
Leaf_Cluster_C (1155)	Seita.9G349500	0.00099699	0.227427	-0.285301	-0.532737	-0.27542	-0.376238	-0.390847	-0.687971	-0.812446	-0.511216	-0.812446	-0.430108	3.01361	2.42615	1.89885	-0.30004	-0.0600341	0.216802	0.0800732	-0.417291	-0.373399	-0.320833	-0.539404	-0.738186
Leaf_Cluster_C (1155)	Seita.9G352400	-1.29243	-1.1963	-0.977349	-1.61248	-0.992511	-0.981765	-0.0714283	0.0750852	0.360053	-0.502576	-0.31215	-1.17271	1.95609	2.21626	1.07954	0.173948	0.00771522	1.16786	0.594196	0.327497	-0.144539	0.60993	0.609503	0.0785597
Leaf_Cluster_C (1155)	Seita.9G358700	-0.972468	-0.400649	-0.93286	-0.589876	-0.638122	-0.44093	-0.987027	-1.05508	-1.09116	-1.00343	-1.2758	-1.11502	1.58052	1.9205	1.16296	0.298765	0.102716	1.10558	0.648899	0.994436	0.0375543	1.32479	0.585436	0.740282
Leaf_Cluster_C (1155)	Seita.9G369800	-0.531568	-0.301502	-0.340063	0.317363	-0.0345923	0.870061	-0.217831	-0.366131	-0.736664	-0.216959	-1.24957	-1.10659	2.43505	1.61225	1.4109	-2.00385	0.134438	-0.22842	-0.938805	-0.445927	-0.548288	0.827768	0.983674	0.675267
Leaf_Cluster_C (1155)	Seita.9G378500	-0.495372	-0.64138	-0.735084	-0.898347	-0.938315	-0.898302	-0.938315	-0.911348	-0.803726	-0.857284	-0.938315	-0.938315	2.23909	1.73712	1.46457	0.845296	1.04324	1.06931	0.67576	0.631223	0.528126	0.0537395	0.130225	-0.423606
Leaf_Cluster_C (1155)	Seita.9G379600	-0.418491	-0.213637	-0.00456547	-0.763978	-0.92801	-0.313437	0.335701	-0.0937192	0.0938698	-1.35019	-1.28458	-1.14916	2.18672	2.06944	1.46667	0.0213583	-0.328469	0.753876	1.0421	1.18809	-0.0275729	-0.885681	-0.983086	-0.413249
Leaf_Cluster_C (1155)	Seita.9G380000	-0.591653	-0.588253	-0.0290006	-0.720268	-0.521874	-0.590787	-0.907231	-0.994836	-1.18248	-0.665626	-1.07103	-0.926441	2.31191	1.60731	2.12866	1.07129	0.639861	0.800606	-0.331048	-0.431415	-0.205237	0.320344	0.337152	0.540052
Leaf_Cluster_C (1155)	Seita.9G380500	-0.302804	-0.516047	-0.560504	-0.0268072	-0.0223502	-0.114704	-1.65679	-1.84637	-1.72591	-0.477799	-0.580476	-0.458889	0.88963	0.999554	0.814492	1.11505	1.22933	1.18605	-0.747135	-0.469114	-0.49629	1.13015	1.3855	1.25225
Leaf_Cluster_C (1155)	Seita.9G381600	-0.94028	0.0299473	-0.46635	-1.61636	-0.959467	-1.14359	-0.646991	-1.0179	-1.45953	-0.55531	-0.415404	-0.326722	2.26882	1.90805	1.48035	0.774584	0.518004	0.550682	0.51194	0.407762	0.249505	0.244872	0.296672	0.306716
Leaf_Cluster_C (1155)	Seita.9G382000	-0.184639	0.0989065	-0.341624	-0.0334261	-0.0774788	0.0107292	-0.782682	-0.839058	-0.937136	-1.17979	-1.1079	-1.26613	2.01162	1.72257	1.88847	1.09606	0.637124	0.883931	-1.10956	-0.663335	-1.01321	0.313989	0.069462	0.803115
Leaf_Cluster_C (1155)	Seita.9G389200	-0.75318	-0.564335	-0.646232	-0.811179	-0.918617	-0.842252	-0.817934	-1.01304	-0.92963	-1.07032	-1.14245	-1.22215	1.81881	1.62414	1.60037	1.1489	0.782799	0.967965	0.418099	0.300221	0.0841181	0.771684	0.61017	0.60405
Leaf_Cluster_C (1155)	Seita.9G392800	-0.974827	-0.786291	-0.945989	-0.748589	-0.974827	-0.764008	-0.974827	-0.891822	-0.974827	-0.911684	-0.944265	-0.974827	1.2795	1.78952	1.37843	0.71138	0.531749	1.13964	0.0524875	0.56199	0.0219294	1.35139	1.05562	0.993135
Leaf_Cluster_C (1155)	Seita.9G396300	-0.76345	-1.36239	-0.326818	1.35284	0.6604	0.864908	-1.59792	-0.498286	-0.633053	-1.07067	-1.64718	-1.4787	0.986698	0.66202	0.703201	0.848162	0.383703	0.861456	-0.167853	-0.564748	-0.615778	1.24902	1.2632	0.891239
Leaf_Cluster_C (1155)	Seita.9G402500	-0.827275	-1.29661	-1.49817	-0.358137	-0.457621	-0.724442	-0.466725	-0.919381	-0.949638	-1.1806	-0.955052	-0.935189	1.9792	1.73597	0.262323	0.958621	0.793927	0.716931	0.270474	0.695763	0.53975	1.21254	0.789894	0.613445
Leaf_Cluster_C (1155)	Seita.9G403500	-0.403965	-0.966905	-0.902545	-1.46308	-0.0576762	0.837145	-0.584072	-0.361856	-1.01276	-0.98812	-0.996318	-0.873849	1.44342	0.865829	1.41458	1.14853	0.312723	0.241678	0.948286	0.809108	-1.55616	1.70837	0.81584	-0.378201
Leaf_Cluster_C (1155)	Seita.9G409000	-0.485396	-0.485396	-0.485396	-0.485396	-0.485396	-0.485396	-0.485396	-0.485396	-0.485396	-0.485396	-0.485396	-0.485396	3.14127	2.7761	1.44804	-0.261491	-0.106447	-0.032741	-0.337299	-0.485396	-0.253793	-0.0144664	0.028372	-0.0773856
Leaf_Cluster_C (1155)	Seita.9G412200	-0.747651	-0.422149	-0.655508	-0.369251	0.389264	-1.03523	-0.355627	-0.49082	-0.864816	-0.88829	-0.382027	-0.869964	2.36473	2.50419	2.21698	0.394093	-0.4209	0.288958	0.257879	-0.126965	-0.590987	0.0542987	-0.181747	-0.068454
Leaf_Cluster_C (1155)	Seita.9G416600	-1.07248	-1.61949	-1.39571	-0.393983	-0.320122	0.177947	-0.359389	-1.76577	-0.778077	-0.500847	-1.02289	-0.694361	1.85248	1.47922	1.03262	1.02173	0.933233	1.13052	-0.0435336	0.231249	0.0449884	0.727707	0.646985	0.687966
Leaf_Cluster_C (1155)	Seita.9G417800	-0.44002	-0.510484	-0.565859	-1.65857	-1.19079	-1.24766	-0.624238	-0.952181	-0.982145	-0.509848	-0.633414	-0.833342	1.91112	1.46606	1.51967	1.25149	1.1387	1.06789	0.571095	0.325505	0.389762	0.425533	0.0221024	0.0596246
Leaf_Cluster_C (1155)	Seita.9G422400	-0.957491	-0.85245	-1.01726	-1.18533	-0.282663	0.261038	-0.0710863	-0.280577	-0.875257	-1.03121	-0.895097	-1.18533	1.30517	0.870316	1.4791	0.119251	-0.704292	0.930639	0.513704	-0.527224	-0.240024	2.0105	1.83791	0.777661
Leaf_Cluster_C (1155)	Seita.9G435200	0.485304	0.228501	-1.07116	-0.538033	-0.780305	0.579761	-1.29908	-0.943876	-1.37912	-0.0409155	-1.58654	0.0798756	0.862695	1.66533	1.34966	1.1324	0.511327	0.326533	-0.992932	-0.34764	-0.413551	2.20962	-0.314089	0.276246
Leaf_Cluster_C (1155)	Seita.9G435800	0.32203	-0.474497	-0.677905	-0.0574289	-0.369838	-1.18875	-0.906214	-1.25121	-1.20867	-0.676556	-1.29796	-0.551577	1.95515	1.6928	1.84987	-0.337009	-0.66717	1.02383	0.320818	0.516782	0.64853	1.34096	-0.173611	0.167616
Leaf_Cluster_C (1155)	Seita.9G436700	-0.591111	-0.4539	-1.08067	-0.346766	-0.708285	-0.535266	-1.11205	-0.850979	-1.43149	-1.20536	-1.28225	-1.3487	1.68618	1.4307	0.987332	0.852172	0.914608	1.01454	0.548021	0.733283	0.392867	0.949856	0.888685	0.548601
Leaf_Cluster_C (1155)	Seita.9G443500	-0.159967	-0.106829	-1.13043	-1.90429	-1.76673	-1.44025	-0.394429	-0.688781	-0.872641	-0.501788	-0.69511	-0.384312	1.70239	1.29469	0.901653	0.92392	0.729794	0.651127	0.501399	0.583064	0.0324698	1.14001	1.14123	0.443813
Leaf_Cluster_C (1155)	Seita.9G444500	-0.782475	-0.858091	-1.04762	-0.689394	-0.630156	-0.403456	-1.24928	-0.74286	-0.956488	-0.866665	-1.32564	-1.01472	1.41049	1.89588	0.406948	1.29225	0.651217	0.361411	0.0146009	0.821607	0.156432	1.38748	1.04466	1.12387
Leaf_Cluster_C (1155)	Seita.9G454700	-0.980015	-0.959638	-0.87801	0.0400657	-0.347189	-0.270588	-0.739227	-0.775582	-0.438971	-0.972035	-0.861418	-0.955103	2.61315	2.35726	1.26089	0.302914	0.65366	0.275755	0.524762	-0.265801	-0.480669	0.83969	-0.395476	0.451573
Leaf_Cluster_C (1155)	Seita.9G458600	-0.653998	-1.01715	-1.26435	-0.98809	-0.842898	-0.754121	-0.731352	-0.480789	-1.09118	-0.679391	-0.859128	-0.24999	2.10307	1.73014	1.10038	0.834724	0.870656	1.72796	-0.00631996	0.30189	-0.167643	1.05992	0.304997	-0.247337
Leaf_Cluster_C (1155)	Seita.9G460700	-0.796682	-0.185825	-0.911851	-0.635919	-0.319083	1.03572	-0.547138	-0.746466	-0.96441	-0.625013	-1.07625	-1.07625	1.53281	1.02364	2.02146	0.0533448	-0.358813	1.1847	-0.558817	0.138734	-0.783998	2.3241	0.0285395	0.243469
Leaf_Cluster_C (1155)	Seita.9G472700	0.0645651	0.0656744	0.105272	-2.11573	-0.240538	-2.11573	0.325655	0.0414411	-0.188481	-0.448238	-0.506573	-1.04443	1.28995	1.40875	1.22393	0.00197456	-2.11573	0.491249	0.814962	0.492984	0.557255	0.678014	0.612146	0.601627
Leaf_Cluster_C (1155)	Seita.9G476000	-0.30147	-0.377845	-0.366206	-0.434884	-0.411853	-0.642482	-0.683606	-0.661752	-0.546401	-0.828745	-1.02256	-1.24752	2.8622	2.45585	1.08071	-0.433693	-0.79241	0.137465	0.171874	0.0149787	0.430516	0.681905	0.312439	0.603493
Leaf_Cluster_C (1155)	Seita.9G476100	-0.773552	-0.63708	-0.905188	0.225115	-0.181622	-0.11824	-1.22369	-1.00075	-1.19636	-1.18724	-1.45279	-0.920135	1.79083	1.42534	0.953153	-0.18331	-0.18813	0.375318	0.23859	0.326711	0.39423	1.64193	1.43597	1.1609
Leaf_Cluster_C (1155)	Seita.9G481600	0.242609	0.481669	0.600908	0.27031	0.0216954	0.242879	-1.41033	-1.20401	-0.980631	-1.45122	-1.83162	-1.55044	1.69995	1.81832	1.49767	0.497713	0.245642	0.368207	-0.417911	-0.134691	-0.431005	0.383698	0.536862	0.503733
Leaf_Cluster_C (1155)	Seita.9G482900	-0.501763	-0.238164	-0.589244	-0.575417	-0.415303	-0.000125582	-0.820425	-0.142282	-0.283785	-1.67469	-2.15984	-1.9768	1.47763	1.15237	1.30136	0.191728	0.344613	0.572612	0.733825	0.426858	0.0995148	1.25016	1.05238	0.774793
Leaf_Cluster_C (1155)	Seita.9G483100	-1.7851	-0.518281	-1.0125	-1.02577	-0.799256	-0.98365	0.22406	-0.213476	-0.540839	-0.33289	0.638087	0.949227	1.71663	2.74752	1.5861	0.150126	0.195142	0.015389	0.169287	0.111008	0.289501	-0.427183	-0.645166	-0.507969
Leaf_Cluster_C (1155)	Seita.9G494500	-0.567565	0.509715	-0.995415	-0.900885	-0.77306	-0.496099	-0.365219	-0.567055	-0.780525	-0.424637	-0.251448	0.170042	2.36446	2.91253	1.6941	0.306748	0.349614	0.12727	-0.842291	-0.282351	-0.30547	-0.556325	-0.0791672	-0.246971
Leaf_Cluster_C (1155)	Seita.9G502900	-0.27257	-0.474088	-0.628021	-1.83914	-1.60659	-1.79185	-0.59511	-0.640231	-0.993951	-0.465831	-0.489216	-0.371161	1.43247	1.64892	1.10879	0.29356	0.232902	0.743993	0.589939	0.794232	0.332664	1.11359	0.964322	0.91237
Leaf_Cluster_C (1155)	Seita.9G503600	-0.540111	-0.669052	-0.627516	-0.537317	-0.669052	-0.61357	-0.669052	-0.669052	-0.669052	-0.669052	-0.669052	-0.669052	2.2477	2.09911	0.74172	0.633464	0.532055	1.37918	-0.669052	-0.669052	-0.669052	-0.669052	1.362	1.35191
Leaf_Cluster_C (1155)	Seita.9G503700	-1.00756	-0.698714	-1.02857	0.263621	0.276735	0.274811	-1.09516	-1.02064	-0.98484	-1.10886	-1.32886	-1.2223	1.67964	1.13666	0.163738	0.425615	-0.267128	0.280374	0.0847785	0.106592	0.252879	1.85896	1.73576	1.22247
Leaf_Cluster_C (1155)	Seita.9G506400	-0.998486	-0.774976	-0.930605	-0.327179	-0.765443	-0.955288	-0.542377	-0.698645	-0.72358	-0.384873	-0.99327	-0.15961	2.44153	0.89545	1.26538	1.87547	1.60216	0.721629	-0.919846	-0.135829	-0.405843	0.374749	-0.0306639	0.570147
Leaf_Cluster_C (1155)	Seita.9G507200	-0.75579	-0.291274	-0.689204	0.132435	-0.287902	-0.0755142	-1.37985	-1.03151	-1.04791	-1.18987	-1.57541	-1.5593	2.03052	1.55995	1.18671	0.484497	0.600027	0.710583	0.354352	0.397767	-0.0119709	0.968233	0.717649	0.752789
Leaf_Cluster_C (1155)	Seita.9G509400	-0.546984	-0.532217	-0.994203	-0.770684	-0.483653	-0.293335	-1.15076	-1.08283	-1.08996	-0.719343	-0.96672	-0.935615	2.54155	1.80305	1.64436	0.339429	0.567175	0.2134	0.415189	0.560325	-0.112574	0.937226	0.248419	0.408753
Leaf_Cluster_C (1155)	Seita.9G515800	-1.11906	-1.1624	-1.10482	0.591424	0.527315	0.563132	-0.556949	-0.409156	-0.249359	-1.0833	-1.04151	-1.08188	1.19065	1.13747	0.903949	-0.153168	-0.400094	0.0439939	-0.670702	-0.431879	-0.765028	1.56351	1.917	1.79087
Leaf_Cluster_C (1155)	Seita.9G519500	-0.432405	-0.162134	-0.53928	0.320598	0.419004	0.362009	-1.35245	-0.618063	-1.20645	-1.67261	-1.94499	-1.70965	1.51356	1.31226	1.31423	0.50058	0.266918	0.796554	0.402811	0.320985	-0.188958	1.01809	0.818598	0.460798
Leaf_Cluster_C (1155)	Seita.9G519600	-0.307082	-0.667797	0.329699	0.304527	-0.149379	0.0397162	-0.949552	-1.08646	-1.60699	-1.13401	-1.61463	-1.56259	1.41292	1.40048	1.82587	0.036923	-0.237342	1.25069	0.956677	0.188359	0.662981	-0.320185	0.808653	0.41853
Leaf_Cluster_C (1155)	Seita.9G523700	-0.611321	-0.323433	-0.527849	-0.759789	-0.732151	-0.677014	-0.744687	-0.875829	-0.345737	-0.796591	-0.526904	-0.187803	2.28282	2.96758	1.81842	-0.226722	-0.209149	-0.401144	0.0612382	-0.287183	0.20672	-0.135085	0.408705	0.622914
Leaf_Cluster_C (1155)	Seita.9G526800	-0.92984	-0.92984	-0.92984	-0.92984	-0.92984	-0.92984	-0.807616	-0.816576	-0.785824	-0.92984	-0.92984	-0.92984	1.94019	1.01132	1.61425	1.00414	1.00582	1.16141	0.880494	0.220645	-0.14911	1.07374	0.456024	0.559639
Leaf_Cluster_C (1155)	Seita.9G527300	-0.672129	-1.21623	-1.34382	-0.478114	-0.3729	0.313985	-0.595694	-0.0503902	-0.850242	-1.08695	-1.51478	-1.42771	1.61925	1.71873	1.49016	-0.0819647	-0.266955	0.824043	0.940077	0.572145	0.138673	1.24114	0.919461	0.180216
Leaf_Cluster_C (1155)	Seita.9G528700	-0.885509	-0.429361	-1.09181	-0.845999	-0.219009	-0.491862	0.141882	-0.557255	-0.900746	-0.170021	-0.897413	-1.34498	2.67037	2.33795	0.779782	-0.604045	-0.38786	0.668232	0.0696105	0.0362144	-0.164169	0.648268	1.02785	0.609878
Leaf_Cluster_C (1155)	Seita.9G543300	-0.338042	-0.318877	-0.352889	-0.145627	-0.501605	-0.613089	-0.794798	-1.17494	-0.649607	-1.10932	-1.24214	-0.946793	2.57222	2.37226	1.34979	0.515886	0.759888	0.329626	-0.354592	-0.459274	0.0120971	0.0460588	0.471984	0.571784
Leaf_Cluster_C (1155)	Seita.9G545600	-0.886359	0.297347	-0.764229	-0.548082	-0.780288	-0.0278839	-0.659214	-0.831563	-0.737601	-0.917644	-1.05209	-1.05209	1.20888	1.15734	2.27722	1.99116	1.31353	0.510041	-0.301217	0.134403	-0.823288	0.906848	0.162494	-0.577723
Leaf_Cluster_C (1155)	Seita.9G546500	-0.851879	-0.453791	0.0546851	-0.523777	-0.813958	-0.621711	-0.952494	-0.967914	-1.1168	-0.47158	-0.729851	-0.763996	2.21321	0.714135	2.29357	0.712223	0.635897	1.32261	-0.812827	-0.373655	-0.689089	0.690216	0.971853	0.534925
Leaf_Cluster_C (1155)	Seita.9G548400	-0.327934	-0.714491	-1.29653	-0.0977995	-0.0465885	-0.446559	-0.84396	-0.73439	-1.54608	-0.944709	-1.86026	-0.911828	1.63064	0.86734	1.27789	0.985867	0.805144	0.825956	0.779691	0.445904	-0.452819	1.64093	0.753458	0.211136
Leaf_Cluster_C (1155)	Seita.9G550700	-0.31765	-0.183031	-0.948472	-0.541452	-0.590361	-0.917194	-0.0874298	-0.679493	-0.671617	-1.07792	-1.21288	-1.29207	2.78288	1.67634	1.62661	0.219535	-0.0439885	-0.34941	0.0562573	0.552415	0.888708	0.711273	-0.119878	0.518828
Leaf_Cluster_C (1155)	Seita.9G551900	-0.447614	0.411741	-0.49185	0.0559536	-0.183076	0.36578	-1.20115	-0.910325	-1.55879	-0.858751	-1.31895	-1.48489	2.33251	1.91569	1.60233	0.518571	0.226375	0.306795	-0.0575954	-0.187561	-0.154	0.791443	0.170477	0.156882
Leaf_Cluster_C (1155)	Seita.9G553900	-0.712304	0.640428	-0.712304	-0.590909	-0.587252	-0.00880517	-0.346921	-0.622009	-0.712304	-0.428856	-0.61547	-0.712304	3.16514	2.66758	0.746533	0.54511	0.155707	-0.120839	-0.321065	0.0450818	-0.327201	-0.102103	-0.535761	-0.509168
Leaf_Cluster_C (1155)	Seita.9G559200	-0.816967	-0.0929413	-0.674998	-0.641579	-0.837518	-0.597	-0.982345	-1.27547	-0.979452	-1.32505	-1.31092	-1.23646	1.94268	1.46492	1.2553	0.705244	0.563224	0.729268	0.767366	0.752657	0.30428	0.85326	0.73082	0.701675
Leaf_Cluster_C (1155)	Seita.9G560500	-1.34229	-0.97836	-1.02025	0.13423	-0.026998	1.38426	-0.486706	-0.152523	-0.279984	-1.47866	-1.43318	-1.12433	0.643542	1.18019	0.62428	-0.585007	-0.620432	0.544139	0.995871	0.49685	-0.701466	1.79068	1.60379	0.832356
Leaf_Cluster_C (1155)	Seita.9G562400	-0.402858	-0.402858	-0.402858	-0.402858	-0.402858	-0.402858	-0.402858	-0.402858	-0.275517	-0.402858	-0.402858	-0.402858	3.22558	2.14409	2.2534	-0.402858	-0.402858	-0.284831	-0.287021	-0.402858	-0.402858	-0.402858	-0.28767	-0.0423054
Leaf_Cluster_C (1155)	Seita.9G564200	-0.420013	-0.594776	-1.24945	-0.129021	0.175418	-0.0567652	-0.502202	-0.130114	-1.04724	-1.50834	-1.00427	-1.21989	2.3978	2.47863	1.24418	-0.129467	-0.114993	0.0718431	-0.248086	-0.122809	0.399055	0.636653	0.421876	0.651974
Leaf_Cluster_C (1155)	Seita.9G564500	-1.27521	-1.27856	-0.523025	-0.94902	-1.02432	-1.18721	0.394192	-0.444952	-0.353001	-0.32832	-0.632496	-0.338706	2.76729	1.83739	1.26758	-0.427871	-0.312598	-0.152585	-0.0495553	0.436657	0.574292	0.643319	0.359122	0.997594
Leaf_Cluster_C (1155)	Seita.9G567000	-1.82411	-1.21619	-0.853192	-0.160009	-0.279648	-0.761911	-0.162583	0.0546844	-1.15193	-0.332386	-0.441724	-1.98359	0.962877	2.0911	1.46209	0.637083	0.752304	1.12408	0.254205	-0.0368266	0.681509	-0.187778	0.636416	0.735535
Leaf_Cluster_C (1155)	Seita.9G567800	-0.849299	-0.059865	-0.663793	-1.03023	-1.25263	-1.10539	-0.507023	-0.559032	-0.899584	-1.11314	-1.06449	-1.13619	1.35671	1.30509	1.49817	0.976022	0.207139	0.511267	1.15769	0.520699	-0.0941302	1.58834	1.31931	-0.10563
Leaf_Cluster_C (1155)	Seita.9G576800	-1.30588	-0.314202	-0.323253	-0.76013	-1.1651	-1.37354	0.103281	-0.302018	-0.40138	-0.828063	-1.23789	-0.95006	1.3329	2.75397	1.36038	-0.259641	-0.152727	-0.0279105	0.4463	0.477683	0.647823	0.716436	0.759229	0.803799
Leaf_Cluster_C (1155)	Seita.J001800	0.321698	-0.889813	-0.0387048	-0.396126	-0.649613	-0.889813	-0.380149	-0.696872	-0.279834	-0.409084	-0.889813	-0.201576	2.48035	2.5133	1.36572	-0.56933	-0.0325144	-0.316009	0.0365982	0.350737	-0.836815	-0.556101	1.63665	-0.672895
Leaf_Cluster_C (1155)	Seita.J002600	-0.210547	-0.223718	-0.936874	-0.562647	-1.02931	-1.02931	-0.0292669	-0.518555	-0.852033	-0.133789	-0.836323	-0.913627	2.511	2.3399	1.01355	0.0385463	-0.312507	1.32607	0.73452	-0.0235955	-0.260473	1.02841	-0.768759	-0.350662
Leaf_Cluster_C (1155)	Seita.J004000	-0.342745	-1.09868	-0.940062	-0.342252	-0.656742	-0.726122	-1.53063	-1.35555	-1.04236	-0.776925	-0.772773	-0.890221	1.82307	1.66146	1.39239	0.281166	0.00944244	0.787282	0.692284	0.486919	0.675894	1.22488	0.611915	0.828364
Leaf_Cluster_C (1155)	Seita.J029000	-1.07486	-0.737707	-1.10477	-0.487495	0.694971	1.03822	-1.10477	-1.00944	-1.10477	0.460649	-1.10477	0.15891	1.29354	0.536292	1.54355	2.00472	0.805504	0.258665	-1.10267	0.370536	-1.10477	-0.625529	0.282086	1.11392
Leaf_Cluster_C (1155)	Seita.J029400	-0.863062	-0.878837	-0.922328	0.212307	-0.143039	0.156829	-0.922328	-0.922328	-0.732596	-0.725085	-0.797285	-0.597575	2.66749	1.37188	1.49403	0.85408	0.0314083	0.134716	-0.440646	-0.922328	-0.922328	1.01778	1.21259	0.636666
Leaf_Cluster_C (1155)	Seita.J031200	-1.10268	-0.719101	-1.132	-0.458889	0.74418	0.743439	-1.132	-1.03082	-1.132	0.508351	-1.132	0.285901	1.14694	0.371712	1.35978	1.98757	0.882367	0.348435	-1.132	0.450929	-1.132	-0.542689	0.380218	1.43637
Leaf_Cluster_C (1155)	Seita.1G027500	0.0195267	-0.519836	-1.65494	0.233225	-0.969453	-0.151937	-0.873521	-0.991287	-0.759178	-1.42338	-1.53732	-0.586456	1.47276	1.46411	-0.131274	0.598242	0.510707	0.118578	0.0160916	0.520418	0.31003	1.80424	1.52092	1.00974
Leaf_Cluster_C (1155)	Seita.1G033600	-0.0200875	1.31127	-0.55513	-0.812117	-0.230625	-0.864924	-0.499464	-0.38832	-0.569808	-0.679823	-0.893913	-0.71137	2.07223	2.88569	1.01489	-0.92306	-0.819912	-0.334119	-0.338985	-0.397963	-0.257858	0.611031	0.56847	0.833896
Leaf_Cluster_C (1155)	Seita.1G034000	-0.690304	0.727289	-1.18106	-0.390356	-0.365068	-0.308998	-0.576714	-0.587154	-0.716251	-1.29937	-1.32765	-1.45463	2.73161	1.84984	0.704308	0.075294	-0.382041	-0.109244	0.718223	0.476891	0.551619	0.717348	0.363197	0.473217
Leaf_Cluster_C (1155)	Seita.1G038100	0.229056	-0.0558059	0.0540102	0.876379	0.565583	0.552425	-1.12055	-1.30485	-1.38476	-0.43445	-1.13509	-0.356183	1.24576	0.400489	0.800566	1.55449	1.21337	0.668351	-1.56262	-1.13498	-1.62473	-0.0497459	0.977536	1.02574
Leaf_Cluster_C (1155)	Seita.1G039900	-0.16471	-0.544537	-1.40009	0.0430322	-0.222472	0.382939	-0.984052	-0.222379	0.00974899	-1.50964	-1.61396	-1.82658	1.93985	1.36503	-0.203898	0.00161704	0.052134	0.130143	0.0418979	0.555132	0.215825	1.19929	1.3966	1.35908
Leaf_Cluster_C (1155)	Seita.1G040700	0.568202	-0.805592	0.376619	-0.730744	-0.825101	-0.488218	-0.907164	-0.0149157	-1.05766	-0.982825	-1.33056	-0.696103	1.34649	0.514829	2.54374	-0.483601	0.0743623	-0.200028	-0.654858	-0.487194	0.469003	1.56641	0.522923	1.68199
Leaf_Cluster_C (1155)	Seita.1G050200	-0.30274	-0.730127	0.0858506	0.0906653	-0.191954	0.988777	-1.59354	-0.599042	-1.18484	-0.958653	-1.44896	-0.549275	0.41298	0.665044	1.03681	1.07165	0.696962	1.40155	-1.26434	-0.548572	-0.904926	0.528718	1.63681	1.66116
Leaf_Cluster_C (1155)	Seita.1G054700	0.612701	0.108264	0.993844	0.249655	-0.675891	0.514729	-1.19818	-1.18164	-0.817834	-1.0682	-1.03521	-0.571789	1.48797	1.58553	2.62091	-0.13861	-0.331466	-0.164137	-0.522893	-0.997739	-0.924106	0.86511	0.257216	0.331769
Leaf_Cluster_C (1155)	Seita.1G071800	-0.124743	0.0560137	-0.466177	-0.476419	-0.378164	0.225716	-1.09102	-0.623461	-0.183287	-1.08802	-0.938251	-1.35626	2.62767	1.62183	0.508775	-0.595372	-0.706341	-0.412236	0.645971	0.868552	-1.14154	1.55262	0.874492	0.59965
Leaf_Cluster_C (1155)	Seita.1G081300	-0.307053	-0.649177	-1.06916	-0.996329	-0.819755	-0.786679	-1.16803	-0.311037	-0.539126	-1.00997	-0.840113	-1.54759	1.54561	1.62714	1.13223	0.742692	1.18465	0.577997	0.732788	-0.0881635	-0.360318	0.293649	0.946843	1.70888
Leaf_Cluster_C (1155)	Seita.1G090900	-0.116005	-0.589182	-0.259502	-0.164549	0.332929	-0.558929	-1.35657	-0.993667	-0.524787	-0.860757	-1.80022	-1.55677	1.54347	1.04003	1.62816	0.144301	-0.311274	0.43792	1.03797	-0.408628	-0.0869124	0.835458	1.96143	0.626082
Leaf_Cluster_C (1155)	Seita.1G097700	-0.433928	0.628193	-0.571248	-0.174182	-0.521268	-0.111667	-1.08429	-0.764679	-0.186056	-1.4709	-1.27131	-1.08304	1.41272	0.0399424	1.53571	-0.214668	0.25689	-1.04446	0.293657	-0.550593	0.814121	0.473036	1.81237	2.21564
Leaf_Cluster_C (1155)	Seita.1G116400	0.85663	0.603428	0.783429	-0.672381	-0.0557844	0.682793	-1.15355	-0.714265	-0.690752	-1.51047	-1.09429	-1.35815	1.51368	1.90985	1.56577	-0.175683	-0.511348	0.669368	-0.132081	-1.20684	-0.940162	0.872085	0.68628	0.07245
Leaf_Cluster_C (1155)	Seita.1G119900	-0.00518285	-0.136872	-0.68011	-0.537365	-0.492059	-0.713492	-0.603939	-0.540826	-0.468169	-0.895376	-0.964005	-1.2428	2.62853	2.52543	1.33776	-0.380077	-0.174444	-0.546062	-0.326309	-0.166389	0.311804	0.573453	0.527831	0.96867
Leaf_Cluster_C (1155)	Seita.1G124300	-0.269135	-0.264155	-0.665681	0.269839	0.683969	0.503285	-1.4086	-0.739229	-0.785213	-1.8009	-1.18584	-1.76121	2.03133	1.79454	0.135814	0.382475	-0.0958102	1.18989	0.741545	0.429857	-0.39277	0.526466	0.780679	-0.101145
Leaf_Cluster_C (1155)	Seita.1G128700	0.31097	-0.450313	-0.372537	-0.448499	-0.182637	0.0877102	-0.531529	-1.22296	-1.4898	-0.615575	-0.573502	-0.11611	0.387214	1.85013	1.55034	-1.1147	-0.958617	0.446639	-0.462366	-0.820193	-0.176459	1.28639	2.08337	1.53304
Leaf_Cluster_C (1155)	Seita.1G133500	-0.567791	-0.240406	0.586624	0.925985	0.472904	0.977775	-1.57222	-1.04893	-0.896364	-1.02193	-1.84972	-0.73066	1.24243	0.852853	1.08549	-0.515304	-0.362379	-0.189876	-0.949781	-0.116298	-0.244524	0.997655	1.54069	1.62378
Leaf_Cluster_C (1155)	Seita.1G140000	-0.468744	-0.373246	-0.694469	-0.678129	-0.679797	-0.646256	-0.543442	-0.756577	-0.756577	-0.60742	-0.756577	-0.670296	2.45132	1.27289	0.132118	-0.593042	-0.30831	0.0347311	0.164931	-0.351794	-0.425018	2.23924	1.46073	1.55374
Leaf_Cluster_C (1155)	Seita.1G144500	-0.573812	-1.23019	-0.903577	-0.18825	-0.272062	-0.605546	-0.682096	-0.653855	-1.27438	-1.02771	-1.64968	-0.849897	1.30806	1.23099	1.53215	0.798513	0.0181545	0.732461	-0.517587	0.355193	0.520248	1.44348	0.889175	1.60022
Leaf_Cluster_C (1155)	Seita.1G158700	0.284814	-0.0596709	0.255117	0.609209	0.402422	0.511977	-1.80938	-1.03191	-0.63713	-0.451123	-0.392627	-1.60935	1.05783	0.995989	1.2149	-0.345866	-2.62397	0.316174	0.0235636	-0.00539119	0.151888	1.12202	1.42686	0.59366
Leaf_Cluster_C (1155)	Seita.1G162200	0.128413	-0.371028	-0.0960684	-1.03267	-0.6839	-0.102596	-0.606851	-1.32005	-1.16182	-1.08878	-1.69775	-1.30895	1.37541	0.565694	1.40485	0.920996	0.805394	0.63744	-0.327051	0.154441	-0.137043	0.664771	1.62793	1.64922
Leaf_Cluster_C (1155)	Seita.1G176900	-0.449791	0.342281	-0.049637	-0.391559	-0.0618871	-0.139073	-0.708935	-0.454779	-1.0744	-0.810635	-0.63608	-0.982758	3.36348	1.97388	0.484923	-0.355662	-0.442168	-0.530077	0.012786	-0.474011	-0.717782	0.445508	1.18359	0.472795
Leaf_Cluster_C (1155)	Seita.1G179600	-0.466404	0.0456741	-0.667901	0.920845	0.84275	0.862902	-1.17822	-0.427535	-1.38655	-1.23316	-1.41428	-1.15474	1.28614	1.15265	0.876241	0.238721	-0.283893	0.199514	-0.254414	-0.654615	-1.13666	2.04157	1.21032	0.581052
Leaf_Cluster_C (1155)	Seita.1G191700	-0.636381	-0.80655	-0.918532	0.152832	0.127326	-0.0972009	-0.968506	-1.34708	-0.740385	-1.41264	-1.94683	-1.26658	1.44297	1.51991	0.43959	1.04324	0.346622	0.822685	0.33521	0.302153	0.613318	1.18438	1.2718	0.538663
Leaf_Cluster_C (1155)	Seita.1G193600	-0.619534	-0.683464	-0.538205	-0.76348	-0.67312	-0.675737	-0.691025	-0.697855	-0.76348	-0.76348	-0.692995	-0.76348	2.43997	0.859657	0.152968	-0.0794482	0.0399625	0.0733164	0.0939383	-0.0131216	-0.442822	2.04126	2.31459	0.845588
Leaf_Cluster_C (1155)	Seita.1G197300	0.431281	-0.0718487	-1.06416	0.0181672	0.424673	-0.263402	-1.11038	-1.34616	-1.37779	-0.502553	-1.46824	-0.868865	2.46436	0.0668962	0.347358	1.01963	1.11919	0.417643	-1.02797	0.0770437	-0.331978	1.43031	1.06251	0.554278
Leaf_Cluster_C (1155)	Seita.1G216300	-0.476715	-0.533863	-0.815389	-0.430417	0.052705	-0.698829	-1.42309	-1.25497	-0.99152	-1.21057	-1.38676	-1.0959	1.91652	1.19605	0.725978	-0.0212456	0.400255	0.711019	0.360534	0.695802	0.47591	1.3298	1.2912	1.18348
Leaf_Cluster_C (1155)	Seita.1G224800	0.675978	1.20049	0.287921	-0.866745	-0.64134	-0.103734	-1.1618	-0.706685	-0.803336	-1.08966	-0.885977	-0.830194	2.16348	2.09822	1.64091	-0.12774	-0.265851	-0.46707	-0.298132	-0.559452	-0.902046	-0.00052003	0.675168	0.968122
Leaf_Cluster_C (1155)	Seita.1G240400	-0.613777	-1.04094	-0.762951	-0.422543	-0.274329	1.27026	-0.534689	-1.07391	-1.3688	0.540052	1.00323	0.965263	2.27824	-0.352111	1.95805	-0.757865	-0.393912	-0.517868	-0.525747	0.486183	1.15238	0.517061	-0.519614	-1.01167
Leaf_Cluster_C (1155)	Seita.1G254000	-0.952118	-0.0680405	-1.05565	0.376042	0.0880953	0.028941	-1.04045	-0.984884	-1.48622	-1.01264	-1.39066	-1.10649	2.14765	0.41728	0.575153	1.86488	0.932862	0.67547	-0.470005	0.41427	0.0839931	1.36978	0.240558	0.352174
Leaf_Cluster_C (1155)	Seita.1G267100	0.0488051	1.04138	-0.521819	-0.889673	-0.495214	-0.507155	-0.628421	-0.584924	-1.08869	-1.0256	-1.17756	-1.28024	2.63938	2.35516	1.06161	-0.167662	-0.0508523	0.381355	0.0228283	-0.131256	-0.095009	0.626513	0.268769	0.198268
Leaf_Cluster_C (1155)	Seita.1G267900	-0.181316	0.256044	-1.01402	-0.425165	-0.307271	-0.534965	-0.953398	-1.05042	-1.50319	-1.48788	-1.39937	-0.991877	2.1824	1.9086	0.743993	0.742421	0.670708	0.756654	0.687997	0.588918	0.541794	0.308646	0.365191	0.0955086
Leaf_Cluster_C (1155)	Seita.1G279700	-1.11164	-0.144376	-0.752357	-0.327948	0.860431	-0.453449	-1.06274	-0.964649	-1.12641	-1.26969	-0.948491	-0.478529	1.75217	1.03426	0.376811	2.36669	0.00208914	0.872163	0.264843	-0.390324	-0.986327	0.557986	1.11064	0.818851
Leaf_Cluster_C (1155)	Seita.1G285800	0.771077	0.587221	0.32851	-0.983159	-1.12475	-1.02874	-0.791172	-0.821437	-1.15426	-1.62732	-0.914526	-0.342564	2.1187	1.85165	0.851321	-0.413091	-0.508587	0.165006	-0.321369	0.226917	0.0713659	1.17936	1.0153	0.864546
Leaf_Cluster_C (1155)	Seita.1G291600	0.566616	0.466975	-0.0505566	0.598859	0.534009	0.407095	-0.824948	-0.221129	-0.711711	-2.01132	-1.81808	-1.7747	2.16436	1.83725	0.83352	0.306642	0.360138	0.329005	-0.815431	-0.00543838	-0.3692	0.153338	0.0244427	0.0202574
Leaf_Cluster_C (1155)	Seita.1G291700	2.07976	-0.962614	2.25673	-0.578128	-0.872101	0.00922938	-0.928079	-0.615449	-0.798045	-0.886401	-0.89004	-0.672347	0.862702	1.17203	0.168924	0.653624	1.16569	-0.401776	-0.848985	-0.898486	-0.898819	0.526368	0.793862	0.562357
Leaf_Cluster_C (1155)	Seita.1G297100	-0.101583	-1.14776	0.162867	1.00508	0.580364	1.33441	-0.802714	0.219855	-0.211975	-1.68329	-2.88829	-1.31072	0.877111	0.429191	1.3886	0.0928205	-0.0478058	-0.159516	-0.473325	0.883958	0.259613	0.639877	0.603422	0.349802
Leaf_Cluster_C (1155)	Seita.1G312200	-0.485647	-0.989125	-0.735748	0.136029	0.039528	0.245929	-1.01817	-1.42611	-1.13514	-1.0541	-1.33648	-1.3109	1.24853	0.972301	1.27653	0.466282	-0.219328	0.144202	-0.163114	0.260438	0.452764	1.71762	1.0863	1.82741
Leaf_Cluster_C (1155)	Seita.1G317400	0.142259	-0.376193	0.0673578	-0.0582122	-0.0812422	0.604973	-1.29056	-1.06116	-0.320779	-2.23241	-1.28431	-2.04872	0.803129	1.11536	1.19295	0.346924	0.0715344	0.957212	1.78854	0.407442	0.0329705	0.628167	0.767242	-0.172482
Leaf_Cluster_C (1155)	Seita.1G325400	-0.427603	-0.921386	-0.853059	0.341784	-0.11158	1.07664	-0.406403	-0.86493	-0.390068	-0.756508	-1.36148	-0.767515	0.467231	-0.127471	1.85188	1.9725	-0.538366	-0.196659	-0.121848	-1.06242	-0.988351	1.52445	1.36987	1.29129
Leaf_Cluster_C (1155)	Seita.1G336700	-0.348678	-0.0135549	-0.460858	-0.42176	-0.0526535	-0.237499	-0.764019	-0.573136	-0.730268	-1.06271	-1.39831	-1.10256	2.88928	2.13318	0.843985	0.68168	-0.108656	0.0584849	-0.194001	-0.872596	-0.26488	1.1561	0.546021	0.297418
Leaf_Cluster_C (1155)	Seita.1G348800	-0.780037	-0.251987	-1.33253	0.566492	0.528653	0.0250256	-0.783814	-0.572674	0.224343	-0.87375	-1.22155	-1.24015	1.02177	1.75229	0.856014	-0.475366	-0.15938	-0.0814572	-0.921689	-0.884871	-0.372889	1.5968	1.58128	1.79947
Leaf_Cluster_C (1155)	Seita.1G349600	-0.623582	-0.708588	0.321011	-0.762899	-1.0136	-0.838095	-0.0519855	-0.320908	-0.848377	-1.37618	-1.27691	-1.30528	1.17674	0.867601	2.05497	-0.421578	0.244929	-0.0440984	-0.185119	0.821955	0.116431	1.78761	1.56394	0.822028
Leaf_Cluster_C (1155)	Seita.1G349900	-0.731074	-0.833324	-1.01911	-0.732817	-1.52958	-0.230656	-0.682068	-0.487516	-0.733324	-0.443753	-1.01905	0.00161886	1.68376	1.85484	-0.273022	0.789676	1.57953	0.614629	-0.809008	-0.191408	-0.305901	1.1244	1.74129	0.631857
Leaf_Cluster_C (1155)	Seita.1G351500	0.723788	0.741821	0.479604	0.457047	0.364259	0.793456	-1.84805	-0.658823	-0.993537	-1.4246	-2.23967	-1.15401	1.28752	1.66915	0.69532	0.765935	0.58853	0.921618	-0.096449	0.104066	-0.846436	-0.236184	-0.000188205	-0.0941669
Leaf_Cluster_C (1155)	Seita.1G351800	0.974359	0.0713019	0.0782163	-0.464121	-0.0910578	-0.484151	-1.68272	-1.27419	-1.37302	-0.770347	-0.671811	-0.81836	1.30058	-0.032403	1.39974	-0.17997	-0.906826	0.554839	0.269665	-0.689453	-0.0768835	2.00666	1.57467	1.28528
Leaf_Cluster_C (1155)	Seita.1G361500	0.160254	-0.13468	-0.984633	-0.111914	-0.123587	-0.351515	-1.25079	-1.13585	-0.677638	-2.0679	-1.01313	-1.13282	1.15646	1.38761	1.40121	0.970856	1.17062	1.416	-0.0435398	0.0829415	-0.850412	0.947425	0.765219	0.419807
Leaf_Cluster_C (1155)	Seita.2G000200	-0.449624	0.476137	-0.227174	0.587687	0.766757	1.00082	-1.08503	-0.534401	-1.78139	-2.7918	-0.932191	-1.01479	1.36321	1.16882	0.756832	0.984628	0.125054	0.865706	0.40565	0.649105	-0.0250342	0.11936	-0.0895482	-0.338785
Leaf_Cluster_C (1155)	Seita.2G005800	-0.155681	-0.185013	-0.0500138	1.45447	0.462566	1.26251	-0.98256	-0.541736	-1.69844	-1.44112	-0.825554	-0.877528	2.06108	1.68459	0.308013	-0.93773	-0.91607	0.784664	0.162626	0.231479	-1.00539	0.0424576	0.407368	0.755018
Leaf_Cluster_C (1155)	Seita.2G022100	-0.221759	0.285476	-0.770484	-0.466165	-0.729788	-0.72314	-1.06622	-1.10027	-1.1776	-0.823676	-1.26691	-1.00714	2.55075	1.92537	0.929942	0.946571	0.933429	0.976637	0.177274	0.0960913	0.112681	0.335658	0.00974515	0.0735264
Leaf_Cluster_C (1155)	Seita.2G030300	-0.855492	-1.09656	-0.153792	-0.509062	-0.768248	-0.580143	-0.512348	-0.591349	-0.594238	-1.63078	-1.25313	-0.592075	0.953989	1.65247	1.00877	0.0484936	0.26626	-0.349025	-0.0450305	0.156185	0.357169	1.03024	2.09686	1.96083
Leaf_Cluster_C (1155)	Seita.2G031900	1.14635	0.302031	-0.149537	0.0139131	-0.52376	-0.39047	-1.61975	-1.31645	-1.08506	-1.37678	-1.43349	-0.551538	2.02648	1.98266	0.569616	0.535733	0.556856	0.398516	-0.603417	-0.22683	-0.205551	1.09504	0.0990837	0.756354
Leaf_Cluster_C (1155)	Seita.2G032600	-0.685266	-0.839378	-0.289538	0.214812	-0.0178811	1.07654	-1.4399	-0.67563	-1.49501	-1.43644	-1.10806	-1.68882	1.14306	0.666068	1.08407	0.513514	0.381801	0.347868	-0.00342301	-0.129541	0.122811	1.6641	1.35382	1.24043
Leaf_Cluster_C (1155)	Seita.2G035600	-1.40267	0.703869	-0.660022	-0.12886	-1.38501	-1.35524	-0.268437	-1.59382	-0.166938	-0.739505	-1.17292	-0.858163	1.96505	1.01268	0.498251	0.256872	1.55411	-0.0428282	0.298232	0.28024	0.898729	0.144686	0.881078	1.28062
Leaf_Cluster_C (1155)	Seita.2G038000	-0.729376	0.23075	-0.825371	-0.0712386	-0.0822081	-0.509908	-1.26678	-0.382342	-0.853708	-2.28003	-1.55097	-1.21673	1.47841	1.24452	0.472609	1.23588	0.93581	1.20394	0.615865	0.181025	0.150494	0.232419	0.922458	0.864482
Leaf_Cluster_C (1155)	Seita.2G058300	-0.467115	-0.0448987	-0.0514107	-0.952722	-0.952722	-0.952722	0.394515	0.292518	0.149371	-0.163086	-0.220117	-0.79875	1.83799	0.395194	1.01824	-0.952722	-0.952722	-0.952722	-0.720262	-0.601413	-0.723303	2.36027	1.78551	1.27307
Leaf_Cluster_C (1155)	Seita.2G058800	0.00639896	-0.618064	-0.608681	-1.34304	-1.34304	-1.34304	0.366585	0.876553	0.98478	-0.902297	0.0215587	-0.420722	0.837109	0.768343	0.451589	-1.34304	-1.34304	-1.34304	0.68155	1.35227	1.04022	0.692831	1.34949	1.17872
Leaf_Cluster_C (1155)	Seita.2G070500	-0.262741	-0.21077	-0.404518	0.516776	0.391663	0.669807	-1.51109	-1.78687	-1.98812	-0.688753	-1.49023	-0.428892	1.26139	0.703773	0.798042	1.10532	0.0624215	0.726199	-0.704238	-0.0210596	-0.326657	1.53658	1.02397	1.028
Leaf_Cluster_C (1155)	Seita.2G072400	-0.0231069	-0.934167	0.335041	0.927204	0.807808	0.593274	-1.17685	-1.05037	-1.08617	-1.65524	-1.44209	-1.60106	1.30982	1.03318	1.16065	1.46474	1.04715	1.08508	-0.387277	0.244685	-0.149928	-0.553878	0.0943683	-0.0428582
Leaf_Cluster_C (1155)	Seita.2G090600	1.07628	0.170732	1.45842	0.119555	-0.185211	0.29744	-1.29992	-0.27567	-0.528721	-2.11623	-2.01	-1.93548	1.15761	0.821283	1.28315	0.609685	0.529062	0.72064	0.0998784	0.461242	0.0778409	0.00400062	-0.398661	-0.136913
Leaf_Cluster_C (1155)	Seita.2G105100	-0.129731	0.910542	-0.385822	-1.17451	-0.777614	-0.808644	-0.405504	-0.340868	-0.818189	-0.672698	-1.2031	-0.565413	1.85177	2.44684	0.64839	-1.06137	-0.846359	-0.911716	0.277397	1.04743	1.23522	0.456003	0.501664	0.726273
Leaf_Cluster_C (1155)	Seita.2G113500	0.268342	-0.551536	0.442673	1.03957	0.437732	0.941288	-0.293783	-0.339018	-0.424638	-1.54256	-2.17175	-2.37129	0.353578	0.745406	1.19608	0.848667	1.61941	0.919397	0.120227	-0.253293	0.276143	-0.737503	-0.392011	-0.131128
Leaf_Cluster_C (1155)	Seita.2G113700	-0.285442	0.205673	0.237492	-0.218678	-0.13518	-0.355678	-1.14068	-0.344282	-1.1784	-1.54359	-1.93568	-1.30093	2.14825	0.149282	1.05162	1.79172	0.94698	0.766757	0.744301	0.825936	0.235867	0.0151496	-0.207494	-0.472989
Leaf_Cluster_C (1155)	Seita.2G118900	1.03999	1.0378	1.00489	0.651653	1.05006	0.849911	-1.13782	-1.16787	-1.1281	-1.26553	-1.26904	-1.12751	0.870053	0.912282	0.891237	0.957106	1.09648	1.16206	-0.851447	-0.714187	-0.599652	-0.656821	-0.790481	-0.815074
Leaf_Cluster_C (1155)	Seita.2G124200	0.105562	0.206935	0.409706	-0.55184	-0.106043	-0.00885083	-0.872478	-0.52785	-1.40028	-1.39653	-1.44625	-1.16418	2.43284	1.26261	1.89618	0.450457	0.570988	0.844543	-0.535445	-0.7116	-0.60308	0.106103	0.461778	0.576723
Leaf_Cluster_C (1155)	Seita.2G137800	-0.122901	-0.27416	-0.636439	0.00836681	-0.346384	-0.257182	-0.748374	-0.911266	-1.28899	-1.50265	-1.80988	-1.38078	2.06092	1.8918	0.621753	0.28552	0.144228	0.377518	-0.0789858	0.841043	0.41544	1.02518	0.913027	0.773187
Leaf_Cluster_C (1155)	Seita.2G145600	0.686508	-0.216545	-0.235191	-0.994976	-1.00645	-0.208828	-1.69184	-0.84032	-1.50918	-0.744959	-0.890672	-0.905376	1.26609	1.80185	1.46773	0.132509	0.10054	0.629443	0.66937	-0.0420289	-0.700619	1.42417	1.31267	0.496102
Leaf_Cluster_C (1155)	Seita.2G153000	-0.63764	0.399663	-0.834292	-0.511577	0.100141	0.455632	-0.76428	-0.548157	-0.844413	-1.18008	-1.04699	-1.1152	3.21954	1.37377	1.14199	0.821478	0.623217	0.673513	-0.203084	-0.196442	-0.750223	0.295063	-0.318282	-0.153342
Leaf_Cluster_C (1155)	Seita.2G168500	-1.40204	-0.619794	-0.599596	-0.197771	1.51332	-0.640186	-1.05822	-0.348295	-0.534197	-1.21403	-0.821763	-0.637528	0.909352	1.51861	0.964327	-0.177249	-0.400279	-0.0761514	-0.805258	-0.49485	0.140331	1.78875	1.60744	1.58507
Leaf_Cluster_C (1155)	Seita.2G208200	-0.540411	-0.221118	-1.27664	0.73002	-0.547783	-0.0280081	-0.119938	-0.530752	-0.492723	-1.20351	-0.942803	-1.63147	1.91866	1.70748	1.17397	0.609239	-0.740201	-0.1734	-0.318406	-0.538424	-0.577276	0.789601	1.37027	1.58363
Leaf_Cluster_C (1155)	Seita.2G208700	0.217705	-0.159963	1.08646	0.767295	0.720531	0.830944	-1.812	-1.11943	-1.11694	-1.22291	-1.72344	-1.29524	0.166995	0.456655	1.90554	0.892949	0.674901	0.988259	-0.708555	-0.533964	-0.459583	0.196816	0.857186	0.389791
Leaf_Cluster_C (1155)	Seita.2G220600	-0.139066	-0.447218	0.101429	1.22824	0.659198	0.601207	-1.25506	-0.716282	-0.215665	-1.90161	-2.38286	-1.13535	1.03498	0.941193	0.860676	0.0286748	0.208999	0.151404	-0.395247	-0.14337	-0.661203	1.09678	1.45246	1.02769
Leaf_Cluster_C (1155)	Seita.2G220700	-0.0577429	-0.57754	-0.671304	-0.674225	-0.315954	-0.798248	-0.828525	-0.875742	-0.78574	-1.18539	-1.45132	-0.875546	1.57869	0.951058	0.727347	0.882071	0.542668	0.926478	-0.432163	-0.443943	-0.323888	1.37469	2.34438	0.969878
Leaf_Cluster_C (1155)	Seita.2G225400	-0.110336	0.166832	0.214576	0.859936	0.272466	0.616956	-1.2014	-0.420227	-0.406769	-1.32427	-2.21521	-1.03963	2.71191	1.63587	0.692633	0.428656	-0.223064	-0.430349	-0.258679	-0.786279	-0.261091	0.599098	0.103409	0.374966
Leaf_Cluster_C (1155)	Seita.2G225500	0.274533	-0.538695	2.00238	0.448073	0.568701	1.61963	-0.697099	-0.51682	-0.972973	-1.11254	-1.63499	-0.590504	1.79698	1.04286	-0.399522	0.704013	-0.222323	-0.463457	-0.384628	-1.3398	-0.975178	0.926343	0.691749	-0.226735
Leaf_Cluster_C (1155)	Seita.2G227100	0.111692	0.0243256	0.202903	0.212306	0.347659	-0.01732	-1.48698	-1.43552	-1.21178	-1.39574	-1.44589	-1.3517	1.23674	1.11248	1.3062	1.27744	1.41818	1.11615	-0.750587	-0.23938	-0.208659	-0.269082	0.60411	0.842456
Leaf_Cluster_C (1155)	Seita.2G248300	-0.706305	0.380553	-0.165773	0.52284	0.368274	0.637092	-1.21808	-1.05297	-0.566556	-1.69798	-1.18517	-1.61546	1.47586	2.04465	0.595345	0.132346	-0.614571	0.881932	-0.124343	-0.035588	-0.788328	1.24687	1.25298	0.232365
Leaf_Cluster_C (1155)	Seita.2G257300	-0.450606	-0.673479	0.0217386	-0.079701	0.0480952	-1.22934	-0.565094	-0.851584	-0.755965	-1.46227	-1.41829	-1.09653	1.79186	0.389201	1.26059	2.03646	1.46207	1.32908	-0.218873	0.03898	-0.645465	0.413312	0.316336	0.339465
Leaf_Cluster_C (1155)	Seita.2G264100	0.303778	-0.779772	-1.09418	0.476687	0.812726	-0.383463	-1.12286	-1.2765	-1.52616	-0.696796	-0.58432	-1.38603	0.733272	1.79549	0.0569799	0.0943785	-0.439916	0.539639	-0.701118	0.81188	-0.0405567	1.09364	1.70563	1.60756
Leaf_Cluster_C (1155)	Seita.2G264800	0.596481	0.0543662	0.612106	-0.756239	-0.465024	-0.30679	-1.45461	-0.902574	-0.513491	-1.65813	-1.27604	-1.5127	2.18692	1.9746	1.13425	-0.00914236	0.143804	0.0349778	0.339183	0.353609	0.286775	-0.336949	0.810956	0.663679
Leaf_Cluster_C (1155)	Seita.2G272000	0.921714	-0.878903	0.0446663	0.0360374	0.56284	0.036589	-0.488727	-0.691717	-0.992211	-1.17993	-1.33616	-1.85319	2.42748	1.93298	1.35979	0.356585	-0.416095	0.626536	-0.441175	-0.460752	0.0953511	-0.165243	0.281726	0.221798
Leaf_Cluster_C (1155)	Seita.2G277400	0.541283	-0.397367	0.0867831	-1.65191	-0.982574	-2.10467	-0.4581	-0.320919	-1.01592	-0.425339	-0.152404	-0.464417	2.09645	1.39156	0.260714	-0.648089	0.0924741	0.0254274	0.430364	0.823625	-0.68543	1.34057	1.45112	0.766777
Leaf_Cluster_C (1155)	Seita.2G286400	-0.037008	0.0393121	-0.591533	-1.46262	-0.918996	-0.844906	-0.260203	-0.302982	-0.945425	-1.13699	-1.12183	-1.61479	1.14464	2.15616	0.987383	-0.198237	-0.264937	0.691222	1.27896	1.19241	0.617741	1.16396	0.620564	-0.191902
Leaf_Cluster_C (1155)	Seita.2G289100	0.126454	-0.356431	-0.570532	0.108425	0.441441	0.918081	-0.458772	-0.237744	-1.1633	-1.8351	-1.00259	-1.91106	2.37932	1.57616	0.722133	-0.306515	-0.459324	0.314486	-0.235045	-0.24966	-0.368757	1.257	0.465125	0.846211
Leaf_Cluster_C (1155)	Seita.2G290800	-0.256547	-0.118316	-1.02637	-0.952101	-1.19956	-0.312813	-0.835377	-0.258579	0.124863	-1.19419	-1.35075	-0.507779	1.23687	3.00746	1.03219	0.267779	-0.488456	0.527647	0.735622	-0.734257	-0.0298415	0.70714	0.856146	0.769225
Leaf_Cluster_C (1155)	Seita.2G290900	-0.0263595	-0.118067	-1.12603	-0.0626001	0.0814857	-0.574644	-1.17188	-1.05402	-1.129	-1.52687	-1.83768	-1.24651	1.86698	1.61103	0.490106	0.581705	0.388166	0.831606	0.56956	0.600362	0.607219	1.01705	0.689276	0.539127
Leaf_Cluster_C (1155)	Seita.2G298000	0.550039	0.0446215	-0.910875	-0.508937	-0.131005	-0.370653	-0.732335	-1.15343	-0.933989	-0.708255	-0.861933	-1.35136	1.65618	1.14983	1.06573	-0.279872	-0.416698	-0.325606	-0.215915	-0.584082	-0.300181	1.56312	1.64319	2.11242
Leaf_Cluster_C (1155)	Seita.2G303000	-0.400963	0.485484	-0.352676	-0.786594	-0.520385	-0.366114	-1.45182	-1.34721	-0.949402	-1.28795	-1.09826	-1.26671	2.43527	1.59181	1.11706	0.575251	0.590482	0.779531	0.541519	0.552334	-0.0941156	0.482228	0.273093	0.498136
Leaf_Cluster_C (1155)	Seita.2G325800	-0.0452003	-0.784533	-0.555316	-0.46279	0.0809829	-0.0638827	-0.888838	-1.28825	-1.14192	-1.03453	-0.496493	-1.32731	1.05848	2.14991	0.309996	0.867077	-0.405901	1.80019	-0.483357	0.0138801	-0.790968	1.15784	1.39417	0.93677
Leaf_Cluster_C (1155)	Seita.2G332000	-0.171732	0.438721	0.0518041	0.970751	0.327134	0.628853	-1.45011	-1.39372	-1.39916	-1.19376	-0.900436	-1.05879	2.14209	1.95311	1.00944	-0.404399	-0.708952	0.285463	0.19561	-0.748026	-0.344754	0.740971	0.564304	0.465576
Leaf_Cluster_C (1155)	Seita.2G334100	-0.364436	0.101277	0.0525073	-0.364807	-0.125644	0.518638	-1.82432	-0.100864	-0.88872	-1.46576	-1.90123	-1.63721	1.24233	1.72311	1.41056	-0.203776	0.266863	0.157176	1.29709	0.78152	-0.0775279	0.81229	0.0817609	0.509173
Leaf_Cluster_C (1155)	Seita.2G347200	0.700439	0.182099	0.825299	-0.301851	-0.315923	-0.278736	-0.44722	-0.635334	-1.07698	-0.970695	-1.45329	-0.957176	2.93208	1.65435	0.898257	0.722678	0.740194	0.243109	-1.08981	-0.688275	-0.721322	-0.267687	-0.180462	0.486238
Leaf_Cluster_C (1155)	Seita.2G358400	-0.266409	0.147196	-0.0556679	-0.411577	0.0114109	-0.0829141	-1.14025	-1.30194	-1.49898	-0.888188	-1.2742	-1.3606	1.8013	1.59761	0.957955	0.279027	0.62255	1.51421	-0.525451	-0.446929	-0.208629	0.163612	0.735161	1.6317
Leaf_Cluster_C (1155)	Seita.2G358800	-0.103674	-0.227603	-0.867685	0.576405	0.517063	0.308232	-1.76278	-1.28099	-1.23227	-0.905946	-0.899767	-1.31141	1.42471	1.34801	0.593307	0.81933	0.255922	1.08625	-0.126013	-0.921816	-0.832106	1.27826	1.15735	1.10722
Leaf_Cluster_C (1155)	Seita.2G365200	-0.817205	-1.09028	-0.709915	0.880094	0.770955	0.822848	-1.42903	-0.53742	-1.70418	-0.416238	-1.60108	-0.968396	1.27715	1.13839	0.634517	0.416659	0.459206	0.432273	-0.921414	-0.228348	-0.193968	1.47045	1.19178	1.12314
Leaf_Cluster_C (1155)	Seita.2G378400	-0.247117	0.926408	0.0406843	0.0838501	0.444975	0.830647	-1.27169	-0.704905	-1.23237	-1.3535	-2.06168	-1.4667	1.4767	1.73796	0.857116	-0.590385	-0.32874	0.398765	0.457274	-0.030056	-0.409975	0.466431	1.31795	0.658353
Leaf_Cluster_C (1155)	Seita.2G404800	0.0452527	-1.07432	0.26188	-0.238547	-0.150143	-0.209966	-0.942593	-0.961543	-0.915494	-1.71765	-1.93039	-1.60871	1.25605	1.30464	1.05806	0.163999	0.144109	0.541522	0.382692	0.475165	0.650235	0.826129	1.18875	1.45087
Leaf_Cluster_C (1155)	Seita.2G412000	-0.205922	0.150114	-0.811493	-1.24341	-1.06574	-0.584529	0.712237	0.509512	-0.89933	0.0929556	-0.586262	-0.350225	1.07722	1.55497	0.257802	-1.36533	-1.55319	-0.131961	0.168368	0.241059	-0.847163	2.17992	1.52532	1.17509
Leaf_Cluster_C (1155)	Seita.2G423500	0.346087	-1.28792	0.362484	-0.0865309	0.206141	-0.647726	-0.676854	-0.533711	-1.19676	-0.656659	-1.38458	-1.32576	0.143297	2.24241	0.705418	0.298039	-0.219303	0.569324	-1.23441	-0.288672	0.251408	1.41053	1.21841	1.78534
Leaf_Cluster_C (1155)	Seita.2G440900	-0.254805	-0.839766	-0.395504	-0.545161	-0.202861	-0.664917	-0.925746	-0.564052	-0.20474	-1.41998	-1.18496	-0.815943	2.50102	1.80346	1.38649	-0.613414	-0.480587	0.301695	0.345588	0.0426567	0.551612	-0.0373603	0.409927	1.80735
Leaf_Cluster_C (1155)	Seita.3G015100	-0.176081	0.63423	-0.841642	-0.191594	-0.184398	-0.0383682	-0.638808	-0.351513	-0.981686	-1.4167	-1.51715	-1.78909	2.40035	1.96762	0.650451	-0.282903	-0.468426	0.309988	0.887458	0.452065	0.258216	1.06036	0.366732	-0.109106
Leaf_Cluster_C (1155)	Seita.3G015400	-0.616887	-0.689151	-1.1028	-0.491457	-1.11557	-0.788733	-0.3938	-1.03916	-0.656111	-1.15076	-0.526804	-1.30204	2.49091	0.920457	0.0507355	0.213882	-0.124181	1.0557	0.975875	1.14084	-0.0133485	1.19377	1.05764	0.910975
Leaf_Cluster_C (1155)	Seita.3G019800	-0.223872	-1.39193	-0.265313	0.0819974	0.694437	0.529678	-0.69788	-1.86041	-0.322375	-0.938523	-0.974775	-1.15849	0.620899	0.945999	0.359919	-0.527822	-0.392335	-0.365183	-0.185995	0.365376	0.129917	1.33197	2.08018	2.16454
Leaf_Cluster_C (1155)	Seita.3G043500	-0.275588	0.0283626	-0.00128435	1.51032	1.45162	1.28954	-1.57663	-0.699628	-0.933753	-1.78352	-1.72034	-1.56546	0.941537	0.568508	-0.273698	0.296288	0.210395	1.06045	-0.177962	0.0539914	-0.498772	0.953988	0.724843	0.416781
Leaf_Cluster_C (1155)	Seita.3G046700	0.246008	0.0385278	0.603442	-0.124759	-0.0179342	0.204889	-0.192755	0.0266639	0.165666	-1.84001	-2.64946	-1.75891	0.746953	0.869095	1.63628	-0.399485	-0.457519	-0.0462284	1.50626	1.03146	0.921082	0.0373584	0.0858611	-0.632501
Leaf_Cluster_C (1155)	Seita.3G055000	0.53355	-1.23434	-0.0535113	0.0207076	0.71426	0.608634	-0.114581	0.289333	-0.994222	-1.09593	-1.16692	-0.986739	1.73294	0.547343	1.75828	-0.46264	-0.51688	-0.564953	-1.26162	-1.29759	-0.257774	1.61851	1.36118	0.822957
Leaf_Cluster_C (1155)	Seita.3G057100	0.0402496	0.751727	-0.0593197	-0.560024	-0.615027	-1.00735	-0.972235	-0.614357	-0.706574	-1.39507	-2.23616	-1.37336	2.11561	1.68908	0.577864	0.635689	0.65018	0.375391	0.140141	0.28434	0.531386	0.661398	0.425973	0.660461
Leaf_Cluster_C (1155)	Seita.3G070500	-0.25316	-0.31373	-0.701208	0.495721	0.245814	0.555313	-1.63654	-1.08902	-0.747539	-1.89333	-1.54636	-1.58768	0.997221	1.53311	0.190561	0.737269	-0.198233	0.973033	0.844016	1.0237	0.473703	0.98773	0.967977	-0.0583641
Leaf_Cluster_C (1155)	Seita.3G071300	0.0638443	-0.424111	1.28558	-0.548299	-0.196586	-0.66172	0.29534	-1.28588	-1.06832	-0.972858	-0.750233	-1.29875	1.74102	0.363875	1.46264	-1.0367	-0.71137	-0.97832	0.645803	-0.242769	0.0882283	1.3404	1.52557	1.36363
Leaf_Cluster_C (1155)	Seita.3G072000	-0.87372	-0.0421412	0.0200072	-0.968305	-0.687823	-1.37224	0.560147	-0.726703	-0.385099	-0.47163	-1.20532	-1.16929	0.554396	0.570566	2.19847	-0.546456	0.14206	0.0410877	0.0781943	-0.592111	0.0182805	0.859686	2.12845	1.86949
Leaf_Cluster_C (1155)	Seita.3G077200	0.19938	-0.454749	-0.139544	-0.406386	-0.695781	-0.298278	-1.04969	-1.20405	-1.1816	-0.884488	-0.682174	-1.28889	1.69912	2.1664	1.83502	0.0920488	-0.325403	0.652274	-0.648642	-0.299327	-0.12681	1.13335	0.853817	1.0544
Leaf_Cluster_C (1155)	Seita.3G080900	0.0879772	-0.666617	-0.0165429	1.41649	1.34109	1.30855	-1.50553	-1.08558	-0.474103	-1.58892	-2.02969	-1.83367	0.974037	0.870076	0.294948	0.736351	0.168308	0.397489	0.347914	-0.00933117	0.0904638	0.675864	0.496367	0.00405136
Leaf_Cluster_C (1155)	Seita.3G083600	0.658953	0.0482634	0.376558	1.22136	0.84638	1.13716	-0.415067	-1.06291	-1.46327	-1.08179	-1.25555	-0.845848	1.06507	0.650458	0.0625985	0.859516	0.644017	-0.183036	-1.27083	-1.45724	-1.4156	1.66458	0.69126	0.524959
Leaf_Cluster_C (1155)	Seita.3G116300	-0.838404	-0.5851	-0.0538849	-0.20715	-0.0970187	-0.0158806	-1.21319	-0.977088	-0.613886	-1.46782	-1.89002	-1.18851	1.7024	0.614212	0.421642	-0.161643	0.702155	1.14348	1.38318	-0.102747	-0.27764	1.22497	1.41551	1.08244
Leaf_Cluster_C (1155)	Seita.3G118000	0.462557	0.543511	0.209628	-0.155827	-0.0955265	-0.102685	-1.28875	-1.28875	-1.28875	-0.47281	-0.608311	-0.249267	2.0342	1.71213	1.42991	0.258988	0.132919	-0.0580404	-1.28875	-1.28875	-1.28875	0.581131	1.14421	0.965776
Leaf_Cluster_C (1155)	Seita.3G137000	-1.73393	0.393308	0.356335	0.0992384	-0.122486	-0.067572	-1.17444	-0.579664	-0.384282	-1.64697	-1.51133	-0.98476	2.76115	0.590617	0.172283	0.421102	0.70856	0.282433	-0.504632	0.468051	-0.175459	0.597495	1.29976	0.73519
Leaf_Cluster_C (1155)	Seita.3G148800	0.356256	0.684476	-0.36357	-1.26648	-0.950242	-0.378671	-0.136511	-0.342646	0.351819	-1.30208	-2.37477	-0.955668	1.85294	-0.0503306	0.228516	1.04582	-0.601751	0.726136	0.627104	-0.0134261	-0.734282	1.3242	1.56845	0.70471
Leaf_Cluster_C (1155)	Seita.3G152300	0.934327	-1.04661	-0.130905	0.294104	0.218308	1.20405	-1.06466	-1.17491	-1.44075	-1.6875	-2.00326	-0.44721	0.290431	0.726049	1.24238	0.618259	-0.416463	0.471487	-0.496143	0.317269	0.202859	1.71677	1.07481	0.597302
Leaf_Cluster_C (1155)	Seita.3G159800	0.723844	0.666911	-0.772825	-0.799348	-0.218818	0.339702	-0.739264	-0.700035	-0.374906	-1.39756	-1.3525	-0.891106	1.56321	0.552789	-0.185513	-1.2194	-0.343939	0.212126	-0.15538	-0.0629876	-0.103697	1.59762	2.58926	1.07182
Leaf_Cluster_C (1155)	Seita.3G160800	-1.25664	-0.400903	0.495637	0.13945	-0.21816	-0.395753	1.22058	-0.812992	-1.16393	-0.761721	-1.24819	-0.855845	1.73908	1.04148	2.69318	0.981196	0.494548	-1.13829	-0.331201	-0.18769	-0.387577	0.477226	-0.158774	0.0352853
Leaf_Cluster_C (1155)	Seita.3G162800	-0.505386	-0.407603	-1.13251	-0.098548	-0.220303	-0.542678	-1.1388	-1.07419	-0.915778	-1.64968	-1.51972	-1.16588	1.69731	1.48148	0.114878	0.62619	0.556894	0.625533	0.374551	0.847549	0.757423	1.2555	1.0636	0.970167
Leaf_Cluster_C (1155)	Seita.3G164200	-1.15728	-0.809639	-1.56479	0.701068	0.560243	0.756505	-0.116155	0.0342358	-0.564452	-1.11525	-1.13995	-1.90421	2.25112	1.45855	0.223989	-0.62332	0.101977	0.682163	-0.0139741	-0.0798577	-0.0261784	1.04259	1.21006	0.0925449
Leaf_Cluster_C (1155)	Seita.3G187500	0.0700445	-0.322112	0.219861	-0.415333	-0.840622	-1.21575	-0.335062	-0.929353	-0.238981	0.445828	0.609384	0.983866	2.71519	0.310033	0.95851	0.538419	1.58367	0.844065	-1.23025	0.0447427	-1.18943	-0.263705	-0.80238	-1.54063
Leaf_Cluster_C (1155)	Seita.3G190800	0.938415	0.333642	0.341063	0.132913	0.931951	0.185923	-0.374481	-0.153066	-0.680037	-1.25096	-1.04456	-1.2622	1.36562	2.49449	0.63457	-1.03885	-1.00201	-0.981229	-0.727297	-0.547558	-1.0631	1.04141	0.744938	0.980399
Leaf_Cluster_C (1155)	Seita.3G209400	0.725075	0.562497	1.3035	0.649326	0.534049	0.728753	-1.28628	-1.27408	-1.49428	-1.27564	-1.0885	-1.1964	0.307562	0.633854	1.59139	1.09551	1.07248	1.22966	-0.697874	-1.16172	-0.817966	-0.0457177	0.129974	-0.225171
Leaf_Cluster_C (1155)	Seita.3G213100	-0.725897	-0.340017	-0.856338	0.452329	0.429552	-0.250777	-0.96375	-0.944131	-0.868001	-0.609308	-0.907386	-0.873201	0.783858	0.797337	-0.00525321	1.32078	-0.288738	-0.220333	-0.0822943	-0.652812	-0.78108	2.45266	0.686324	2.44648
Leaf_Cluster_C (1155)	Seita.3G237200	0.392989	0.311762	-0.632635	0.273883	0.258464	0.613706	-0.839804	-0.833992	-1.23644	-1.33124	-1.20547	-1.41949	2.63238	1.75077	0.879709	0.632496	-0.450658	0.31677	-0.0934202	-0.214562	-0.958063	0.914348	0.537989	-0.299502
Leaf_Cluster_C (1155)	Seita.3G259200	0.492322	0.43777	-0.167454	-1.50304	-0.640235	-1.52766	-1.27355	-0.389038	-0.293691	-0.599611	-0.307818	-0.305086	2.16509	1.76829	1.08293	-0.948618	-0.863244	-0.817351	0.641924	0.453149	-0.265051	0.472092	1.37616	1.01173
Leaf_Cluster_C (1155)	Seita.3G282000	-0.538711	-1.96477	-0.500501	0.98347	1.18764	1.04042	-0.815499	-0.830606	-1.50064	-0.881939	-1.50002	-0.825142	0.896401	0.103162	1.63088	0.55867	-0.294265	-0.242042	0.271741	0.51782	-0.293209	1.54786	0.819259	0.630015
Leaf_Cluster_C (1155)	Seita.3G307700	-0.843028	-0.767504	-0.903824	-0.539806	-0.862987	-1.05097	-0.609659	-0.581564	-0.798357	-1.12754	-1.14886	-0.809306	1.06348	1.91476	0.801973	-0.164744	1.21314	0.0511547	0.178869	0.684347	0.00985368	1.13849	1.10547	2.04661
Leaf_Cluster_C (1155)	Seita.3G321100	0.205668	-0.905707	-1.03948	-1.03948	-1.03948	1.01984	-1.03948	0.177106	0.517028	-1.03948	-1.03948	-1.03948	1.76557	0.399991	-0.262449	-1.03948	-1.03948	-0.0555167	1.087	0.794444	0.491269	1.31677	1.35231	1.45195
Leaf_Cluster_C (1155)	Seita.3G323200	0.109135	-0.569155	-1.11557	-0.851574	-0.479091	-0.73189	-0.0389658	-0.0885107	-0.547559	-0.824694	-0.86378	-0.716971	2.28795	1.61176	0.578276	-0.802553	-1.06793	-0.498691	1.02432	0.276606	-0.35212	1.80122	1.7224	0.137391
Leaf_Cluster_C (1155)	Seita.3G330100	-0.112309	-0.214771	-0.0486642	-0.346533	-0.333883	-0.396303	-1.04955	-1.14976	-1.12648	-1.70692	-1.78905	-1.51493	1.93361	1.49784	1.01218	0.471729	0.423998	0.63728	0.612622	0.607408	0.517188	1.03029	0.605923	0.439092
Leaf_Cluster_C (1155)	Seita.3G339000	0.0191935	0.117039	-0.31497	0.649791	0.00738186	-0.000627244	-1.38061	-0.703993	-0.8362	-0.968402	-1.52325	-0.842681	0.963731	0.919436	2.95069	1.16926	1.00281	0.956446	-0.942676	-0.233951	-0.539159	-0.231938	0.275699	-0.513011
Leaf_Cluster_C (1155)	Seita.3G351100	0.366621	-0.757193	1.17273	0.604009	0.754138	0.842879	-1.43921	-1.43629	-1.38072	-1.42644	-0.919896	-0.797082	0.239585	0.280885	0.784283	0.872671	0.80559	1.17355	-0.77333	-0.777326	-1.26073	1.17903	1.26609	0.626159
Leaf_Cluster_C (1155)	Seita.3G351900	0.703427	-0.509432	0.404543	1.05062	1.00279	1.16397	-0.892529	-0.785607	-1.23406	-1.93524	-1.93567	-1.48544	0.0894902	0.653914	1.23838	1.01068	0.966939	1.17226	-0.0226741	-0.105326	-0.440037	0.262557	0.224821	-0.598371
Leaf_Cluster_C (1155)	Seita.3G355600	0.876902	-0.151329	-0.16826	-0.210416	-0.705391	-0.791619	-1.1705	-0.473325	-0.724975	-0.89882	-1.22937	-0.78495	1.71334	1.28693	0.680372	-0.944681	-0.567784	-0.814108	-0.271334	0.450442	-0.0992448	1.14385	1.9555	1.89876
Leaf_Cluster_C (1155)	Seita.3G386200	-0.539915	-0.55111	-0.51597	-0.318083	-0.0454397	-0.612737	-0.766395	-1.13637	-0.971574	-0.0691957	-0.771131	-0.525614	1.34006	-0.063074	0.0387932	0.224062	-0.228664	-0.663025	-0.657798	0.478331	-0.252826	2.54669	2.31449	1.74649
Leaf_Cluster_C (1155)	Seita.3G388100	0.241427	-0.871248	1.22958	-0.263881	-0.788518	0.642534	-0.849677	-0.65385	-0.291105	-2.2271	-1.67466	-1.30618	0.214679	0.467702	2.10709	0.712328	0.679073	0.592233	-0.612201	0.366041	-0.209428	0.460725	1.0589	0.975533
Leaf_Cluster_C (1155)	Seita.3G403100	-0.423999	-0.527751	-1.06052	0.120856	-1.06052	0.867099	-0.458123	-0.911382	-0.586412	-1.06052	-0.902529	-0.4687	1.52477	0.30835	1.88709	-0.328485	-0.526654	-0.184651	-0.386736	-0.145742	-0.800635	1.65402	1.66494	1.80622
Leaf_Cluster_C (1155)	Seita.3G403600	-0.0520131	0.857423	0.186257	-0.365918	-0.733087	-0.513314	-1.50829	-0.649368	-1.29799	-1.32788	-1.07945	-1.01445	2.55702	1.62717	0.876191	0.575029	1.10798	0.822579	-0.514248	0.0691006	-0.190557	-0.0359949	0.673301	-0.0694995
Leaf_Cluster_C (1155)	Seita.4G018500	-0.616276	-1.22049	-0.440596	1.05961	0.94852	1.51767	-0.483088	0.171781	-0.48492	-2.67468	-1.39537	-1.37063	1.79635	-0.108166	0.249306	0.212454	0.0301043	0.496401	0.913753	0.322151	0.585139	0.49078	0.0947089	-0.0945318
Leaf_Cluster_C (1155)	Seita.4G020700	0.396471	0.155531	0.103137	0.354655	0.395653	0.603251	-0.959575	-0.66674	-1.05843	-2.02416	-1.9787	-2.24873	1.4806	1.48937	1.01325	0.363978	0.238136	0.611971	0.3197	0.0924559	0.117581	0.391474	0.426714	0.382398
Leaf_Cluster_C (1155)	Seita.4G043200	0.628965	0.961665	0.894953	0.544091	-0.325161	-0.123071	0.500985	-1.76558	-1.35441	-0.97	-1.88325	-1.50432	1.26405	1.70543	1.27814	0.713982	0.0900085	-1.1373	-0.110213	0.433449	-0.0183884	0.535897	-0.229753	-0.130183
Leaf_Cluster_C (1155)	Seita.4G048700	-0.865751	0.569922	-0.503055	0.0425815	0.0495022	-0.274543	-0.490981	-1.16802	-1.74966	-1.42579	-1.14411	-0.576611	1.17102	1.60569	0.949563	1.02747	1.53757	0.920026	-1.02134	-0.795084	-0.140434	0.153955	0.788878	1.3392
Leaf_Cluster_C (1155)	Seita.4G057700	-0.676157	-1.00988	-1.14133	0.639315	0.791302	0.173951	-0.816797	-0.653083	0.0840394	-1.80988	-1.794	-1.3402	1.77694	0.999806	0.0483797	0.207086	-0.00959663	0.131827	0.0308657	0.367224	0.468405	0.383626	1.36603	1.78213
Leaf_Cluster_C (1155)	Seita.4G064300	-0.309211	-0.526371	0.023991	-0.635312	-0.643575	-0.442661	-1.22686	-0.826426	-0.673894	-0.349648	-0.685049	-0.230988	0.316319	1.92845	0.320929	-0.16936	-0.832509	-0.0565728	-0.0131664	-0.489409	-0.480508	1.53677	1.56987	2.89519
Leaf_Cluster_C (1155)	Seita.4G072900	0.00136566	-1.29623	-0.252758	1.23442	0.830143	0.89315	-1.1409	-1.2332	-1.00271	-1.56767	-1.5029	-0.367322	0.995415	-0.00905784	1.71732	0.294657	0.0616463	0.203776	-0.641378	-0.0094387	-0.74366	1.65202	1.05747	0.825852
Leaf_Cluster_C (1155)	Seita.4G092200	-0.597162	-0.284301	-0.452456	0.238462	-0.081955	-0.357842	-1.60604	-1.26112	-1.87629	-0.885917	-1.5277	-1.12952	1.49901	0.928474	1.02301	1.28708	0.837122	0.771225	0.406192	0.214521	0.174128	1.31214	0.492562	0.876371
Leaf_Cluster_C (1155)	Seita.4G093700	0.221472	0.165412	-0.309425	0.788866	-0.0658901	-0.493463	-1.49831	0.127692	-0.844237	-1.91321	-1.42159	-1.71473	2.32188	1.55911	0.854357	0.704212	0.693939	0.140275	-0.0260275	-0.375865	-0.161504	0.639408	0.464483	0.143146
Leaf_Cluster_C (1155)	Seita.4G122000	-0.45457	-0.506029	-1.20558	0.145704	0.160588	0.17496	-1.13606	-0.535259	-0.79598	-1.6076	-1.93834	-1.15367	2.00909	1.7019	0.0832955	0.324128	0.684131	0.571442	-0.164084	0.501783	0.188017	0.926435	1.18529	0.840401
Leaf_Cluster_C (1155)	Seita.4G123900	0.951224	1.09926	0.412495	-0.772126	-0.678158	-0.975779	-0.340726	-0.0516784	-0.218234	-1.45101	-1.68558	-1.72351	1.68507	1.92733	1.11569	0.309064	0.0929199	0.0527392	0.882169	0.324082	0.837974	-0.445676	-0.557221	-0.790311
Leaf_Cluster_C (1155)	Seita.4G143100	-0.964392	-0.117172	-1.12198	0.338736	0.295042	-0.353077	-0.939954	-0.441246	-1.7646	-1.25379	-2.07882	-0.741933	1.516	1.55446	0.230852	0.826809	0.726959	1.35049	0.384459	0.674344	0.204766	1.10707	0.271448	0.295518
Leaf_Cluster_C (1155)	Seita.4G154700	-0.511065	-0.511065	1.44926	-0.511065	-0.458687	-0.278702	-0.511065	0.92457	-0.511065	-0.509112	-0.507917	-0.511065	-0.511065	3.56781	-0.511065	-0.481517	-0.511065	-0.451686	-0.507966	-0.511065	-0.504254	0.971053	1.27022	0.627588
Leaf_Cluster_C (1155)	Seita.4G155700	-0.568657	-0.300046	-0.778901	0.579718	-0.188021	0.591783	-0.549273	-1.0773	0.310069	-1.83214	-1.41745	-1.63634	0.910586	0.899578	2.10878	0.40459	0.0772754	1.43706	-0.865616	0.273284	-0.546615	0.203278	1.33057	0.633785
Leaf_Cluster_C (1155)	Seita.4G184100	-0.520164	-0.21603	-0.91914	0.672695	0.620904	0.242421	-0.907472	-0.374341	-0.4166	-1.31641	-1.2321	-1.14323	1.14326	1.25284	0.407501	-0.324477	-0.22231	-0.279591	-0.533678	-0.848435	-0.690875	1.96992	1.81112	1.82418
Leaf_Cluster_C (1155)	Seita.4G190200	-0.550918	-0.82219	-0.569784	-0.205062	-0.376549	-0.492257	-0.727327	-0.888359	-0.315886	-1.06796	-2.05766	-1.78815	1.34338	1.45955	0.822483	0.999956	1.02668	1.13397	-0.322033	0.798899	0.246529	0.371971	0.529024	1.4517
Leaf_Cluster_C (1155)	Seita.4G195800	-0.631203	0.422423	-0.404071	0.662162	0.479681	0.350348	-1.30743	-1.46376	-0.992779	-1.20368	-2.28629	-1.12784	1.19479	0.612509	0.98006	1.56038	1.00305	0.721529	0.398553	0.0571109	-0.710303	1.04147	0.328363	0.314913
Leaf_Cluster_C (1155)	Seita.4G200200	0.957342	-0.935818	1.85717	0.249682	0.0259505	1.95639	-1.48221	-0.509353	-0.876051	-1.59146	-1.21164	-1.28179	0.772701	0.615033	0.961941	0.855615	-0.191459	-0.0658869	-0.672631	-0.452359	-0.5335	0.6573	0.973121	-0.0780859
Leaf_Cluster_C (1155)	Seita.4G204100	0.159337	-0.656372	1.1078	-0.502771	-0.766812	-0.0305335	-0.702635	0.173578	0.365534	-1.53648	-1.47283	-1.14776	2.12143	0.271145	-0.24118	-0.626586	-0.549288	0.674344	1.09524	1.26732	-1.18241	1.14265	1.55339	-0.516127
Leaf_Cluster_C (1155)	Seita.4G206500	-0.292014	0.0755788	0.180236	-0.559394	-0.0067989	-0.0777538	-1.3312	-0.781102	-1.31885	-1.75015	-1.13725	-1.65264	1.131	0.642011	1.70475	1.80041	0.558681	0.990944	0.702987	0.0298335	-0.717793	0.87238	0.414545	0.521583
Leaf_Cluster_C (1155)	Seita.4G218600	-0.396242	0.0715174	-0.303045	-0.290635	-0.987247	-0.810916	-1.30386	-1.32558	-0.501234	-0.71258	-0.904016	-0.369237	2.31294	1.61415	1.02855	0.0124285	-0.847428	0.491241	-0.220629	0.0237031	-0.591166	1.06835	1.36521	1.57573
Leaf_Cluster_C (1155)	Seita.4G231200	0.892171	1.29491	-0.846697	-0.13411	-0.245799	0.0573978	-0.829098	-0.846697	-0.846697	-0.775426	-0.712547	-0.766504	2.78113	2.0411	0.750081	-0.846697	-0.146328	0.0664259	-0.771511	-0.779315	-0.818675	0.37946	0.750755	0.352667
Leaf_Cluster_C (1155)	Seita.4G248500	-0.275488	0.0597287	-0.616693	0.970938	0.83739	0.828496	-1.74744	-0.749619	-1.12415	-1.19836	-1.05789	-0.267456	0.700073	1.23614	0.686044	-0.610883	-0.0606282	0.0662533	-0.49371	-0.711967	-1.21979	1.53263	1.41598	1.8004
Leaf_Cluster_C (1155)	Seita.4G249400	-0.0580886	-0.499373	0.229149	0.337935	-0.50337	-0.195603	-0.995133	-1.04864	-1.04791	-0.372879	-0.175966	-1.40224	1.82911	2.10018	1.6145	-1.62484	-0.0995773	-0.0687495	-0.257639	-0.350201	-0.439015	1.03064	1.50254	0.495179
Leaf_Cluster_C (1155)	Seita.4G250700	-0.127372	-0.630957	-0.585368	0.57564	1.13751	0.57334	-0.151285	-0.928376	-0.887258	-1.49075	-1.26011	-1.31921	2.67897	1.56023	0.825242	-0.439884	-0.633375	-0.392534	-0.404373	-0.274797	0.147278	0.559013	1.16673	0.301706
Leaf_Cluster_C (1155)	Seita.4G250800	0.952756	1.16523	1.35008	0.316063	0.352557	0.0372467	-0.64998	-0.32414	-1.00678	-1.71004	-1.71004	-0.62318	2.16789	1.87527	0.781174	-0.848411	-0.0186333	-0.312101	-0.890388	-0.0362407	-0.579679	-0.288991	0.158927	-0.158597
Leaf_Cluster_C (1155)	Seita.4G258300	0.0124419	-0.395845	-1.27761	0.262234	0.712453	0.963541	-0.89331	-0.196933	-0.0776094	-2.28964	-1.00329	-2.16357	0.847905	1.11865	0.0590729	-0.0842127	-0.131573	0.441872	0.846488	0.304985	-0.457172	1.6089	1.40923	0.382999
Leaf_Cluster_C (1155)	Seita.4G264600	-0.512543	-1.08396	-0.0145511	-1.44041	0.0660281	-0.219636	-0.12485	0.0489868	0.0670433	-0.164135	-0.629243	-0.566371	1.29873	0.640056	0.845958	-1.61598	-1.53992	-1.63498	0.490202	1.21461	0.657316	1.15933	1.40211	1.65622
Leaf_Cluster_C (1155)	Seita.4G265300	-0.461359	-0.703833	-0.752126	1.08719	1.73992	1.33656	-1.2574	-1.36167	-0.750378	-1.2231	-1.14366	-1.30112	0.665955	0.505766	0.0279507	0.446936	0.203779	2.00521	-0.264168	-0.135673	-0.343658	0.116141	1.42643	0.136317
Leaf_Cluster_C (1155)	Seita.4G270700	-1.03788	-0.829473	-0.627305	1.1406	-0.767602	-0.420425	-0.418003	-0.897189	-0.372637	-1.50179	-1.43019	-1.43598	0.752775	2.25595	1.07219	0.939161	0.745365	0.0882803	0.275415	0.5277	-0.363993	0.241827	1.46074	0.602466
Leaf_Cluster_C (1155)	Seita.4G284100	0.316234	-0.587104	-0.204712	-1.05609	-0.756258	-0.438718	0.0756635	-0.423562	-0.221028	0.087108	0.651175	-0.756271	1.3831	1.39894	0.92332	-0.705994	-1.05707	-1.11496	-0.848383	-0.95927	-0.912213	2.01479	1.90464	1.28665
Leaf_Cluster_C (1155)	Seita.5G009000	0.227745	-0.238237	-0.630082	-0.455422	-0.542372	-0.740804	-0.786048	-0.857926	-0.996047	-0.705708	-0.123585	-0.53683	2.82079	2.41924	0.532286	-0.519195	-0.608665	-0.168118	-0.409344	-0.515719	-0.187485	0.94983	0.939659	1.13204
Leaf_Cluster_C (1155)	Seita.5G009900	-0.217578	0.293862	-0.405063	-1.14778	-0.183454	-0.732936	-1.26587	-1.43061	-1.24828	-0.868611	-0.221364	0.191751	0.560718	0.299645	0.870933	0.363795	0.626314	-0.139633	-0.0503222	0.284085	-1.3177	2.08189	2.16116	1.49504
Leaf_Cluster_C (1155)	Seita.5G023100	1.28337	0.94502	0.978137	0.327669	0.0574244	0.196901	-1.29518	-1.67345	-0.902835	-1.46494	-2.0201	-0.89355	1.43099	1.22726	1.419	0.598115	0.375278	0.547723	-0.664294	-0.381825	-0.258342	0.0927983	0.0831514	-0.00832513
Leaf_Cluster_C (1155)	Seita.5G036300	0.117521	-0.293202	-0.304393	0.674332	0.886054	0.765756	-0.826369	-0.958423	-1.28557	-1.31314	-2.23894	-0.982667	1.02073	1.10781	1.36069	0.749401	0.35614	0.489509	-0.314051	-0.537981	-1.28331	1.37186	0.608373	0.829859
Leaf_Cluster_C (1155)	Seita.5G037100	-0.0870142	-1.05884	-0.827132	-1.23429	-0.46569	-0.458213	-0.0215475	-0.335522	-0.857591	-1.04068	-0.861291	-0.806769	1.02277	1.6245	0.662012	-0.960757	-1.18599	0.623585	1.10447	0.824202	0.0122778	2.20123	0.882127	1.24415
Leaf_Cluster_C (1155)	Seita.5G041700	0.0373045	0.261777	0.247003	0.119364	-0.0277781	0.55701	-1.27036	-0.447454	-0.988647	-2.00626	-2.19853	-1.38741	1.28713	1.14371	1.70284	0.0198215	-0.242651	0.267971	0.337051	0.147839	-0.238295	1.12771	1.16704	0.383798
Leaf_Cluster_C (1155)	Seita.5G056500	-0.404469	0.0557142	-0.937845	-0.469525	-0.288125	0.114787	-0.902422	-0.209034	-1.95485	-1.06787	-1.55656	-1.70587	0.89248	1.69808	0.606533	0.272682	0.043993	0.80425	0.959283	0.831162	0.0949039	1.71262	0.993209	0.416876
Leaf_Cluster_C (1155)	Seita.5G059000	-0.118181	0.645035	-0.969592	0.310106	0.953311	-0.959118	-1.70899	-0.743295	-1.71461	-1.30671	-1.5223	-0.582363	1.04545	0.843977	0.011912	0.480013	0.916998	0.411927	-0.233914	-0.161346	0.365368	1.56404	1.52335	0.948929
Leaf_Cluster_C (1155)	Seita.5G086500	-0.791672	-0.168059	-0.854099	-0.892284	-0.565261	-0.465025	-0.664694	-0.747548	-0.896401	-0.880797	-0.865511	-0.852479	2.83594	1.36523	0.859121	1.25705	0.928525	1.31068	-0.531564	-0.322075	-0.431079	0.737523	0.547174	0.0873148
Leaf_Cluster_C (1155)	Seita.5G096200	-0.922692	-0.308248	-0.621564	0.320451	-0.325529	-0.0494057	-1.14637	-1.0099	-1.25515	-1.11444	-0.697477	-1.02214	2.51819	0.808635	1.23059	1.2815	1.38008	1.32486	-0.0964568	0.150427	-0.818723	0.498543	-0.102755	-0.0224365
Leaf_Cluster_C (1155)	Seita.5G096600	-0.193373	-0.46425	-0.861213	-0.247854	-0.382259	-0.506549	-1.05177	-1.24915	-1.24013	-1.49838	-1.45093	-1.26862	1.68785	1.36315	0.797984	0.772482	0.813176	0.826099	0.0950066	0.3996	0.298277	1.28022	1.16612	0.914512
Leaf_Cluster_C (1155)	Seita.5G125200	0.906035	0.591337	0.571543	-1.14059	-1.15135	-1.34105	-0.944393	-1.0437	-1.23781	-0.904392	-0.931999	-0.564999	1.91555	0.583	1.64451	-0.391431	0.157101	-0.721779	-0.0211121	0.193018	0.821567	0.537943	1.02887	1.44413
Leaf_Cluster_C (1155)	Seita.5G139800	0.32114	-0.224892	0.478199	0.275251	-0.0740497	-0.969044	-1.18365	-0.5333	-1.40335	-1.59407	-1.47581	-0.739134	1.0283	0.987359	0.729469	0.705305	0.142679	1.01631	-1.04056	-0.667736	0.119631	2.05754	0.432378	1.61203
Leaf_Cluster_C (1155)	Seita.5G140000	-0.10467	-0.243393	-0.991629	0.35681	0.379791	-0.0966574	-1.08055	-0.7775	-0.213061	-1.52128	-1.72113	-1.51185	1.15813	2.31532	1.74525	-0.189742	1.13748	0.063198	-0.148241	-0.0103757	-0.242619	0.262492	0.603645	0.830586
Leaf_Cluster_C (1155)	Seita.5G163200	0.29671	0.0205631	-0.361358	-0.673152	-0.686165	-1.2152	-1.25273	-1.41273	-0.710759	-1.26352	-1.4024	-1.22849	1.57742	1.43737	0.546226	0.675418	0.11124	0.465129	-0.105001	0.721965	0.805836	1.00815	1.28592	1.35956
Leaf_Cluster_C (1155)	Seita.5G168800	0.305964	-0.419337	-0.405073	-0.947993	-0.782738	-0.543465	-1.1149	-0.71493	-1.47512	0.00490139	-0.457401	0.902765	1.2608	0.584866	0.932762	-0.469517	-0.760158	-0.570816	-0.528132	-0.00335234	-0.592905	2.07667	1.9769	1.74022
Leaf_Cluster_C (1155)	Seita.5G190800	1.16196	0.807933	0.998585	-0.551239	0.712005	0.385487	-0.515764	0.0946722	-0.541504	-1.00189	-1.81496	-0.753662	1.52868	1.47309	1.15346	-0.300751	-0.305369	-0.99553	-1.15138	-1.18179	-1.40766	1.00701	0.318134	0.88048
Leaf_Cluster_C (1155)	Seita.5G203500	0.251978	0.768806	0.383418	0.481439	-0.647286	0.367935	-0.698312	-1.10717	-1.1483	0.129105	-1.43924	-0.33023	2.56559	0.737031	-0.18292	-0.498217	-0.0246212	-0.0998585	-1.37658	-1.04595	-0.927127	1.27245	1.27292	1.29514
Leaf_Cluster_C (1155)	Seita.5G208900	-0.846474	0.108615	-0.956302	-0.407704	-0.226163	0.191168	-0.43179	-0.77554	-1.27367	-1.18897	-1.54777	-1.19013	1.82576	0.696352	0.807106	1.87751	0.686683	0.197088	-0.444891	0.162448	-0.667368	1.46255	0.604112	1.33739
Leaf_Cluster_C (1155)	Seita.5G242700	-0.552424	-0.737747	-0.589764	-0.882906	-0.598212	-0.829039	0.399841	-0.432527	-0.591373	-0.659358	-0.765581	-0.684972	1.78712	0.870764	-0.379072	-0.707124	-0.674585	0.0419742	0.44592	0.00267155	-0.493203	2.19605	2.16774	1.6658
Leaf_Cluster_C (1155)	Seita.5G251100	0.76289	0.133544	-0.307209	-0.917589	-0.277359	-0.0311763	-0.51475	-0.197365	-1.62238	-1.55861	-1.39279	-1.75931	1.5616	1.78035	0.921549	-0.421003	-0.0732016	1.04137	0.872098	0.370407	0.486546	0.577892	1.18593	-0.621421
Leaf_Cluster_C (1155)	Seita.5G258600	-0.223773	0.363974	-0.659829	-1.16342	-0.665979	-1.00999	-1.40557	-1.63739	-1.57975	0.755058	1.48976	1.25061	2.29854	1.3581	-0.0809548	-0.328311	0.196803	0.370532	-0.134316	-0.185961	0.00624109	-0.0878515	0.584073	0.489397
Leaf_Cluster_C (1155)	Seita.5G260500	-0.772841	0.109888	-0.985155	-1.25655	-0.319798	-0.82223	-0.725969	0.0696303	-0.0810457	-0.702238	-0.820505	-1.03062	0.83258	1.85916	1.03582	-0.796294	-0.988977	-0.851915	0.178569	0.582943	0.803217	1.73978	1.04565	1.89691
Leaf_Cluster_C (1155)	Seita.5G276800	0.634655	0.770434	0.849668	0.354815	0.136786	0.361246	-1.55912	-0.5518	-1.02384	-1.79779	-1.09941	-0.771865	2.01318	1.34582	1.28407	-0.299791	-0.50051	-0.251735	-0.737882	-0.516251	-1.04388	1.21079	0.906192	0.28621
Leaf_Cluster_C (1155)	Seita.5G287300	-0.106635	-0.5629	0.263785	0.982226	0.722022	1.6963	-1.65356	-1.03532	-1.40052	-1.47342	-2.05205	-0.84007	0.794115	-0.0643874	1.28328	0.544393	0.443296	0.895547	0.110502	0.0691255	-0.571791	0.914219	0.726544	0.315305
Leaf_Cluster_C (1155)	Seita.5G288600	-0.450049	-0.274447	-1.74869	-0.250169	-0.00615675	-0.650822	-0.805632	-1.06939	-1.05538	-1.32423	-1.3355	-1.00721	1.95959	1.58468	0.206949	0.801524	0.858649	0.502341	0.00879042	0.433677	0.531892	0.872457	1.15173	1.0654
Leaf_Cluster_C (1155)	Seita.5G295200	0.443313	0.480705	0.139157	-0.0780361	-2.03291	-1.14469	-0.787694	-1.33223	-0.893926	-0.921269	-0.852181	-0.88786	1.55638	1.63108	0.717301	-0.328941	-0.343046	-0.180273	0.0728395	0.624267	0.149047	1.4152	1.34666	1.2071
Leaf_Cluster_C (1155)	Seita.5G321600	0.328103	0.262012	-0.401864	1.11199	0.27039	0.584482	-1.6243	-1.35488	-0.755894	-2.23971	-1.66339	-1.51348	1.2781	0.918239	0.539524	0.607812	0.34424	0.980364	-0.254292	0.190737	0.341362	0.522413	0.671962	0.856076
Leaf_Cluster_C (1155)	Seita.5G325100	-0.110808	0.523075	0.536057	-0.640421	-0.161629	-0.0994842	-0.590934	-0.417677	-1.10781	-0.925129	-1.33975	-1.42723	2.16528	2.34709	2.05165	0.470611	0.0254687	-0.559511	-0.468193	-0.299879	-0.371225	0.363557	0.119431	-0.0825412
Leaf_Cluster_C (1155)	Seita.5G328200	-0.441892	0.575478	-0.622622	-0.146456	-0.340668	-0.497122	-0.871918	-0.786655	-0.911344	-1.61666	-1.55938	-1.70205	2.29547	1.91809	0.896365	0.463112	0.443437	0.449152	0.623515	0.587355	0.218724	0.510949	0.188545	0.326581
Leaf_Cluster_C (1155)	Seita.5G349200	-0.00191817	0.605046	-0.10663	0.694616	-0.0864451	-0.890726	-1.33653	-0.603168	-1.11373	-1.32899	-1.2251	-1.24232	2.31529	1.07798	-0.0630736	0.369556	-0.0508278	0.177563	-1.48956	0.256849	0.805795	1.00724	1.17757	1.05151
Leaf_Cluster_C (1155)	Seita.5G360400	-0.359103	-0.683036	-0.587875	-0.149037	0.197167	0.0820553	-0.975006	-1.03384	-0.520821	-1.17069	-1.87767	-1.40136	1.41465	1.51543	0.979998	0.73601	0.301031	0.747772	-0.62026	0.144754	-0.557946	0.659838	1.22395	1.93399
Leaf_Cluster_C (1155)	Seita.5G361900	-0.996234	1.20276	0.596406	-0.177064	-1.21036	-0.0720508	0.194876	-0.992901	-0.895944	-1.07804	-1.44505	-1.52429	2.24545	0.878017	1.40571	1.14471	0.542878	-0.204918	-0.947678	-0.0409298	-0.252087	0.64299	0.434157	0.549603
Leaf_Cluster_C (1155)	Seita.5G365600	0.411784	-0.18563	0.5771	1.01799	1.05317	0.986958	-0.706472	0.274136	-0.20282	-2.04336	-1.69494	-1.87916	1.95936	1.18688	-0.153668	-0.648589	-1.23555	-0.0967248	0.101834	-0.324521	0.194883	0.611039	0.202565	0.593747
Leaf_Cluster_C (1155)	Seita.5G368100	-0.0372218	0.257417	0.164305	-0.252387	-0.22392	0.231084	-1.19134	-0.774291	-1.23493	-1.58634	-1.77869	-1.42681	1.98882	1.57402	1.71448	0.106054	-0.448971	0.574865	0.289755	0.365192	-0.227317	0.82694	0.635294	0.453994
Leaf_Cluster_C (1155)	Seita.5G396900	-0.153623	-0.609218	0.791148	0.245494	0.117189	0.00716395	-0.759119	-1.11139	-1.42896	-1.19472	-1.39089	-0.909363	2.56679	0.317277	0.468253	0.70125	0.779351	0.492833	-1.1281	-0.339809	-0.712622	1.09514	1.38895	0.766981
Leaf_Cluster_C (1155)	Seita.5G422200	-0.512565	-0.677405	-0.818886	0.013776	-0.110042	-0.485377	-1.24358	-0.379491	-0.843779	-1.58232	-1.62725	-1.25529	1.9818	1.82025	0.860831	0.944303	0.848862	0.754514	-0.257403	0.24484	0.0895484	0.453299	1.15551	0.625859
Leaf_Cluster_C (1155)	Seita.5G453100	-0.338695	-0.159854	-0.520846	0.91214	0.729883	0.791897	-1.2837	-1.2837	-1.2837	-0.467582	-0.150595	-0.462626	1.28037	1.2067	-0.141822	0.200806	-0.23578	0.604242	-1.2837	-1.2837	-1.2837	1.44484	1.32796	1.68116
Leaf_Cluster_C (1155)	Seita.5G454200	0.0110137	-0.16087	0.363589	-0.309447	-0.57064	-0.0836964	-0.690577	-0.821116	-0.450172	-1.76443	-1.69127	-1.44392	1.87742	1.38691	0.660874	1.08245	-0.872595	0.56281	1.02832	1.27968	1.3913	-0.163565	-0.223634	-0.398451
Leaf_Cluster_C (1155)	Seita.5G456700	0.399932	1.43541	0.348554	-0.933067	-1.01125	-0.82223	-0.301301	-0.57331	-0.431831	-0.278074	-0.161311	-0.260318	2.76178	2.27955	1.41795	-0.505226	-0.480148	-0.272849	0.145699	-0.113278	-0.406177	-0.586466	-0.756641	-0.895392
Leaf_Cluster_C (1155)	Seita.6G029300	1.05242	0.353306	-0.867691	-0.0212769	-0.328283	0.0902528	-1.16187	-0.610639	-0.714087	-2.00657	-1.68584	-1.584	0.927228	0.104264	1.25567	1.24666	0.235759	1.51689	0.137152	0.138404	-0.0377315	1.66571	0.337945	-0.0436583
Leaf_Cluster_C (1155)	Seita.6G037100	0.229722	-0.229341	0.0119383	-1.03405	-0.48054	-0.506748	-0.237302	-0.798386	-0.70024	-0.981783	-0.576863	-1.26476	2.14478	2.43193	2.24561	-0.0990838	-0.250197	-0.000826628	-0.320532	-0.508572	-0.529239	0.218299	0.322791	0.913387
Leaf_Cluster_C (1155)	Seita.6G081100	0.386566	-0.926481	-0.536832	0.0707813	0.502903	-0.359044	-0.0263483	-1.07578	-0.808297	-1.65311	-1.7162	-1.47776	2.22517	1.67593	0.626751	1.00102	0.484426	0.938428	-0.536134	0.047745	1.01426	0.213441	0.0237775	-0.095204
Leaf_Cluster_C (1155)	Seita.6G123200	0.357803	0.129197	-0.374196	-1.30187	-1.41285	-0.9826	-0.471666	-0.310105	-0.259217	-0.391193	-0.721772	-0.936395	2.74508	1.82964	0.970968	-0.237909	-0.872209	-0.712497	0.0300693	0.128212	-0.081325	0.711995	1.30662	0.856212
Leaf_Cluster_C (1155)	Seita.6G141800	-0.158884	-0.597311	-0.531819	-0.268559	-0.267364	-0.452536	-0.0607494	0.453454	-0.388406	-1.58768	-1.45949	-1.59046	2.39918	1.39638	0.0541829	0.150105	-0.0899314	0.446368	-0.0249349	0.357401	-1.13422	2.04079	0.835895	0.478587
Leaf_Cluster_C (1155)	Seita.6G151200	-0.0474908	0.279847	0.741627	0.216298	-0.076201	0.14809	-1.03333	-1.62278	-1.40006	-1.38941	-1.51364	-1.48934	1.08713	1.09763	1.2369	1.18276	1.31313	1.14602	-0.55735	-0.186132	-0.563679	-0.0200288	0.473985	0.976006
Leaf_Cluster_C (1155)	Seita.6G154200	0.388548	-1.04538	-0.538503	0.603759	-0.167812	0.306813	-1.14961	-1.51396	-1.56474	-0.832168	-1.16842	-0.689228	1.87105	0.802251	0.798513	1.28294	0.418253	0.441307	-0.7214	-0.0853723	-0.754037	1.81365	0.563388	0.940147
Leaf_Cluster_C (1155)	Seita.6G182700	-0.0141388	1.02262	-0.930871	-0.464444	-0.0988746	-0.0735041	-0.730447	-0.692759	-1.18459	-0.887754	-1.12818	-1.90002	2.50249	2.00207	0.750197	-0.338601	-0.439789	-0.0946798	0.607164	0.379804	0.321259	0.884167	0.041094	0.467788
Leaf_Cluster_C (1155)	Seita.6G184200	-0.711218	-1.25425	-1.20237	-0.209915	-0.571222	-0.294165	-1.27237	-0.944111	0.15735	-1.12927	-1.31265	-1.32442	1.78375	1.36197	0.62561	0.951642	0.931523	0.783563	0.536284	-0.231503	0.104552	0.894062	1.3313	0.995863
Leaf_Cluster_C (1155)	Seita.6G197600	0.60676	1.55241	0.490566	-1.23565	-1.23565	-1.23565	0.405821	0.586853	0.154781	-0.688512	-0.595668	-0.458904	2.13266	1.87864	0.78803	-1.23565	-1.23565	-1.23565	-0.0619384	-0.214456	-0.209337	0.559355	0.353365	0.133459
Leaf_Cluster_C (1155)	Seita.6G202900	-0.292254	-0.148025	0.0442367	-1.13861	0.279191	0.0867095	-1.53164	-0.859053	-1.69507	-0.689412	-1.16904	-1.1165	1.42354	1.50949	1.75947	0.223682	0.292074	0.748865	0.146943	-0.357254	-0.773305	1.02171	1.31607	0.918184
Leaf_Cluster_C (1155)	Seita.6G212800	-0.529531	1.01834	1.11576	-0.241954	0.379635	-0.940105	-0.628188	-1.20017	-0.725454	-0.120686	-1.15854	-0.310392	-0.0586251	1.28999	0.966997	-0.271251	-0.579604	-1.03368	-1.21506	-0.299141	-0.660537	1.38738	1.55192	2.26289
Leaf_Cluster_C (1155)	Seita.6G238000	-0.380238	0.561275	-0.111847	-0.869378	-1.02691	-0.868432	0.0352086	0.293418	-0.336414	-0.636129	-1.38263	-1.76525	1.12233	1.38401	1.50667	-0.943227	-1.00197	-0.999005	0.886372	1.32686	0.216635	1.52597	0.698544	0.764143
Leaf_Cluster_C (1155)	Seita.6G239000	-0.864756	-0.864756	-0.864756	-0.85593	-0.518977	0.357197	-0.701336	-0.569721	-0.546936	0.040758	-0.287921	-0.279083	0.838187	1.36664	-0.864756	-0.864756	0.958804	0.6452	-0.473262	-0.684279	-0.768181	1.3916	2.19687	2.21415
Leaf_Cluster_C (1155)	Seita.6G248700	0.306489	-0.355319	-0.653729	0.44026	0.075096	0.359303	-1.60823	-0.880018	-1.15292	-1.45125	-2.05745	-1.46263	1.26392	1.25063	0.0337244	0.773071	0.75346	0.658139	-0.106499	0.224499	0.211479	1.4641	1.03647	0.877394
Leaf_Cluster_C (1155)	Seita.6G249300	0.235349	-0.847198	0.152695	-0.764672	-1.58915	-1.21916	-0.651794	-0.449243	-0.578478	-1.06069	-1.09278	-1.05091	1.88822	1.63382	1.59565	-0.208123	-0.296008	-0.342062	0.30819	0.930762	0.403613	1.14112	1.06383	0.797024
Leaf_Cluster_C (1155)	Seita.6G250100	-0.449733	-1.5598	-0.325329	-0.561332	-0.40274	-0.873851	-0.371204	-0.634631	0.144714	-1.49597	-1.5373	-1.31702	1.26383	1.19628	1.40494	-0.0488281	0.156429	-0.0938766	0.104186	0.728861	0.416859	0.976423	1.50277	1.77632
Leaf_Cluster_C (1155)	Seita.7G003000	-0.385356	-0.519103	-0.0331766	-1.06723	-0.470111	-0.370412	-0.498538	-0.740639	-1.1146	-0.895857	-1.38492	-0.971014	0.447716	1.38533	2.35331	-0.403918	-0.607083	-0.237307	0.544302	0.295864	0.19062	1.60114	1.46685	1.41413
Leaf_Cluster_C (1155)	Seita.7G022400	-0.782209	-0.0737962	-0.955976	-0.875009	-0.565073	0.274914	-0.279295	-0.867508	-0.646273	-1.21602	-1.08801	-1.6717	0.674937	1.66002	1.63494	0.010794	-0.578964	0.0699117	0.318341	0.431499	0.15326	1.69332	0.784574	1.89332
Leaf_Cluster_C (1155)	Seita.7G034700	0.533357	0.615822	-0.535954	1.10766	0.941981	0.806452	-1.09326	-0.533475	-0.689734	-2.04998	-1.25054	-1.85071	1.93011	1.73797	0.244941	-0.0951426	-0.179058	0.386386	-0.0494266	-0.354065	-0.626443	0.568573	0.536104	-0.101562
Leaf_Cluster_C (1155)	Seita.7G044100	0.689563	0.429439	0.0211317	-1.38281	-1.38549	-0.941388	-1.21815	0.249361	0.354955	-1.08916	-0.279859	-1.01112	2.13528	1.36122	0.438467	0.889803	-0.79514	-1.38422	0.763796	1.07302	-0.773244	0.694646	0.919121	0.240793
Leaf_Cluster_C (1155)	Seita.7G044400	-0.66007	-0.773566	-0.803699	-0.803699	-0.72475	-0.803699	-0.803699	-0.803699	-0.803699	1.53688	1.97996	1.32503	2.24169	0.64208	1.37883	-0.801823	-0.803699	-0.725696	-0.000945571	-0.05957	0.124643	-0.217632	-0.167038	0.527862
Leaf_Cluster_C (1155)	Seita.7G050500	-0.00884014	0.60393	-1.30911	-1.0058	0.682366	0.258109	-1.28701	-1.17356	-1.1528	0.120596	-0.752358	-0.593888	-0.864812	2.06779	0.38151	-0.444319	1.44315	1.29742	-0.404508	-0.717015	-0.505074	0.78308	1.10088	1.48024
Leaf_Cluster_C (1155)	Seita.7G056500	0.00415637	-0.220278	-0.622996	-0.704061	-0.018896	0.945175	-0.227079	-1.25135	-0.774883	-1.65108	-1.52803	-0.904957	2.16301	2.07619	1.08258	0.15053	0.214542	1.35566	-0.042952	-0.0274529	-0.754334	-0.163644	0.499757	0.400393
Leaf_Cluster_C (1155)	Seita.7G067400	-0.245399	0.067685	-0.350153	-0.28369	-0.372207	-0.291352	-1.54452	-1.68616	-1.43578	-1.06277	-1.55428	-1.17195	1.33147	1.11081	1.09296	1.45037	1.01018	1.16914	0.516072	0.259907	0.130635	0.871633	0.562543	0.424855
Leaf_Cluster_C (1155)	Seita.7G081800	-0.0416473	-0.951932	-0.834628	0.760748	1.19005	1.46365	-0.247142	-0.918185	-1.33988	-1.26687	-1.45147	-1.46556	0.406495	0.94036	1.49735	0.141024	-0.903544	0.129134	1.05126	-0.302836	-0.676501	1.34707	0.718425	0.754632
Leaf_Cluster_C (1155)	Seita.7G098500	0.286313	0.285675	0.73206	-0.932537	-0.915067	-0.800295	-1.06039	-0.767268	-0.822112	-0.174432	-0.928818	0.261732	1.32518	1.07621	1.06584	-0.700696	-0.580553	-0.761404	-0.835851	-0.498316	-0.661871	1.72284	1.78671	1.89704
Leaf_Cluster_C (1155)	Seita.7G126100	0.172924	-0.284102	-0.614248	-0.291864	-0.0868959	0.330777	-1.4595	-1.50213	-1.07699	-1.70924	-1.78836	-0.762379	1.86046	1.07681	0.489459	0.88816	1.19142	1.22776	0.0856035	0.126532	0.0970219	0.907563	0.586915	0.534311
Leaf_Cluster_C (1155)	Seita.7G127300	0.1095	0.869023	-0.232439	0.14124	0.0991089	0.103823	-1.18225	-1.09938	-1.01817	-1.44019	-1.80405	-1.42658	2.31022	2.08118	0.844377	0.576978	0.304411	0.420731	0.0148278	-0.0995187	0.208584	0.294927	0.00543693	-0.0817859
Leaf_Cluster_C (1155)	Seita.7G151800	0.0310506	-1.56832	0.0176851	-0.734937	0.35969	-0.364527	-0.38219	-0.331673	-0.14976	-1.34799	-1.27631	-1.38097	1.17456	-0.0654579	2.42718	1.29194	-1.10817	0.0419331	-0.255237	0.0593837	0.290379	0.718258	1.24427	1.3092
Leaf_Cluster_C (1155)	Seita.7G172700	0.361169	0.735048	0.267364	-1.20052	-1.16026	-1.29249	-0.311251	0.0589212	0.121189	-0.289352	-0.763238	0.104672	0.0812058	-0.013104	1.27226	-1.64321	-0.955528	-0.891053	-0.149292	0.272681	-0.240957	1.88666	1.53327	2.21583
Leaf_Cluster_C (1155)	Seita.7G191500	0.586982	0.42061	0.386056	0.271443	-0.710014	-0.146258	-1.40547	-1.18781	-1.26639	-0.965521	-1.10651	-0.716388	1.84187	1.62246	1.30949	-0.111214	-0.00260736	0.273062	-0.284687	-0.549365	-1.32799	1.66361	1.11672	0.287917
Leaf_Cluster_C (1155)	Seita.7G203200	-0.577629	-0.70225	-0.106914	0.156341	-0.218319	-0.268035	-0.830394	-1.36846	-0.426992	-1.61322	-2.01052	-1.08615	1.45905	1.14253	0.535036	0.175456	0.646829	0.29048	-0.293409	0.224819	0.306807	1.56736	1.58455	1.41304
Leaf_Cluster_C (1155)	Seita.7G207900	-0.178882	0.43741	-0.750944	-0.261206	-0.145176	-0.369015	-1.02758	-1.21989	-0.992804	-1.30328	-1.22584	-1.20168	2.5989	2.23693	0.914934	0.47722	0.351966	0.759602	-0.024821	0.0624725	0.0851234	0.137023	0.483183	0.156362
Leaf_Cluster_C (1155)	Seita.7G208600	0.101728	0.000999896	-1.55267	-0.619569	-0.158761	-0.948657	-1.55585	-0.834127	-0.757678	-1.5443	-1.27252	-0.886081	1.56952	1.73599	0.474445	0.256545	0.86559	0.542396	0.684957	1.18514	0.43513	1.10802	0.541784	0.627967
Leaf_Cluster_C (1155)	Seita.7G213000	-1.05495	-0.633188	-1.18787	0.0702	-0.396636	-0.382798	-0.116085	-0.340127	-0.583021	-0.558177	-1.0816	-0.503248	0.978987	0.392555	0.775685	-0.00606032	-0.173056	-0.444351	-0.44344	-0.753037	-0.19627	2.2764	1.9236	2.43649
Leaf_Cluster_C (1155)	Seita.7G221400	-0.265829	-0.467167	-1.43694	-0.877971	-0.18174	-0.162182	-1.05819	-0.493232	-0.431629	-1.23493	-1.9079	-1.05281	1.68318	1.79596	0.0555667	-0.0421435	0.972754	0.529431	0.158644	0.615615	0.267965	0.969671	1.29464	1.26923
Leaf_Cluster_C (1155)	Seita.7G221600	0.252123	0.226004	-0.529018	-1.19492	-0.756273	-0.876902	-1.12009	-0.613459	-0.680843	-1.07918	-0.9487	-1.41148	1.39134	1.99358	0.740609	-0.496502	-0.677233	0.532596	0.582374	0.519487	0.151985	1.52327	1.5761	0.895141
Leaf_Cluster_C (1155)	Seita.7G228900	-0.462557	0.325768	-0.325843	-0.356376	-0.834662	-0.562598	-1.54232	-0.871448	-0.964193	-0.879247	-1.23367	-1.60982	1.35118	1.48826	0.593269	0.331059	0.486547	1.07586	-0.520176	0.492345	-0.137282	0.990134	1.75545	1.41032
Leaf_Cluster_C (1155)	Seita.7G247300	0.856095	0.884747	0.613796	-0.833522	-1.16813	-1.18079	-0.537557	-0.979283	-0.760363	-0.985611	-1.19607	-1.07038	2.14845	2.06366	1.72664	-0.097997	-0.0212209	-0.158554	-0.0870038	0.575517	0.188489	0.0663254	0.0448183	-0.09205
Leaf_Cluster_C (1155)	Seita.7G254100	-0.151293	-0.410197	-0.869816	0.921288	-0.602353	-0.399834	-1.14434	-0.876205	-0.626969	-0.469228	-1.67636	-0.503069	1.88988	1.24569	-0.171767	-0.530267	0.193216	-0.504071	-0.865409	0.273835	0.298314	1.67234	1.76527	1.54135
Leaf_Cluster_C (1155)	Seita.7G257600	-0.264394	-0.17927	-0.87593	-0.747553	-0.60629	-2.0961	-0.719914	-0.844673	-1.29297	-0.823927	-0.966036	-0.928416	1.45044	1.82127	0.772659	0.550705	0.698572	0.904574	1.07443	-0.134851	0.655168	0.848107	0.978929	0.725468
Leaf_Cluster_C (1155)	Seita.7G264800	0.354095	0.439087	0.335566	0.653982	0.651859	0.735285	-1.67452	-1.20324	-1.67045	-1.68345	-1.35426	-0.94941	1.73153	1.55804	0.874715	0.450003	0.70121	0.868927	-0.423196	-0.0746922	-0.784306	0.0926073	0.338888	0.0317381
Leaf_Cluster_C (1155)	Seita.7G269800	-0.358446	0.21682	-0.69114	0.523632	0.750403	0.293863	-1.24405	-1.05789	-0.87217	-1.45603	-1.51117	-1.33033	2.52928	1.95829	0.602714	0.268214	0.232563	0.826713	0.0820005	-0.198467	0.141797	-0.0080019	0.541625	-0.240221
Leaf_Cluster_C (1155)	Seita.7G273600	0.602747	1.09156	-0.473956	0.050584	1.16568	0.0548449	0.905431	-0.492038	0.736594	-1.88146	-1.68125	-2.11841	1.72542	1.31373	0.289721	0.031469	-0.179525	-0.446606	0.921015	-0.152828	0.431063	-0.369487	-0.656603	-0.8677
Leaf_Cluster_C (1155)	Seita.7G276800	-0.275279	-1.02427	-0.457073	0.465847	0.557758	-0.0275449	-0.696459	-1.41144	-0.751292	-1.91965	-1.4504	-1.57352	1.75083	1.19793	0.875956	0.628452	0.852979	1.46418	-0.0103365	-0.0100051	0.0721011	0.149137	0.765516	0.826584
Leaf_Cluster_C (1155)	Seita.7G285600	-0.0161945	0.316968	-0.886083	-0.407516	0.499395	-0.563791	-1.17467	-0.791286	-0.808842	-1.29945	-1.36046	-1.50867	2.11231	2.24409	0.486846	0.596059	0.978102	1.12649	0.234502	-0.371444	-0.0896873	0.544283	0.272518	-0.133472
Leaf_Cluster_C (1155)	Seita.7G306200	-0.599018	-0.730111	0.167359	-0.0897698	-1.22954	-0.262114	-1.20173	-1.29502	-1.2171	-0.48638	-0.657414	-0.585954	0.65679	0.661457	1.69358	-0.229645	-0.656907	0.412064	-0.685262	0.489964	0.5526	1.57912	1.65185	2.06118
Leaf_Cluster_C (1155)	Seita.7G306300	0.170717	0.501604	0.157571	1.53265	1.35719	0.949488	-0.694661	-0.0763599	-0.220273	-2.09664	-1.62798	-2.03946	1.0135	1.50656	0.398066	-0.695011	-1.01615	-0.527435	0.512042	0.132413	0.521544	0.143183	-0.0803033	0.177731
Leaf_Cluster_C (1155)	Seita.7G314900	0.312406	-0.474623	0.756117	-0.295742	-0.307759	-1.0922	-1.12825	-1.32109	-1.56899	-1.02768	-1.25056	-1.04361	0.473913	1.25621	1.89633	0.519808	0.174108	-0.157776	0.248683	-0.0187299	0.122338	0.692207	1.49806	1.73683
Leaf_Cluster_C (1155)	Seita.7G320500	0.136379	0.84162	-0.485712	0.474373	0.518298	0.105103	-0.924698	-1.30377	-1.18331	-1.18088	-1.28896	-1.44267	2.59703	1.72224	0.636208	0.614537	0.611446	0.710526	-0.534529	-0.387912	-0.690983	0.342204	-0.0680652	0.181528
Leaf_Cluster_C (1155)	Seita.7G326300	-0.706913	1.55736	0.804628	0.646694	-0.887605	-1.54404	-0.7404	-0.466118	-1.54404	0.2312	0.366153	0.441412	1.74823	0.587708	0.772668	1.47612	-1.54404	1.43744	-0.560753	-0.714093	0.064776	-0.7866	-0.206935	-0.432837
Leaf_Cluster_C (1155)	Seita.7G329700	0.400621	-0.432159	0.568192	0.604278	0.0572866	-0.582261	-0.355511	-0.608131	-1.32716	-1.71898	-2.38628	-0.633637	0.396165	0.772088	0.40899	-0.663404	0.282721	-0.373741	1.04107	0.306655	-0.162806	1.52934	2.16401	0.712661
Leaf_Cluster_C (1155)	Seita.8G001800	0.247902	-0.439124	-0.281122	-0.922484	-0.251103	-0.862877	-1.0433	-1.263	-1.06335	-0.900701	-1.29933	-1.18049	1.46177	2.11003	1.43293	0.0419256	-0.340993	-0.0576218	0.597059	0.663932	0.607422	1.24416	1.34091	0.157456
Leaf_Cluster_C (1155)	Seita.8G010600	-0.456097	0.157027	-0.629658	0.0476334	0.0611476	-0.39517	-1.46897	-0.727478	-1.01565	-1.10909	-0.946553	-1.11435	1.87173	2.2669	1.79502	0.235673	-0.325489	-0.238702	0.719402	-0.27394	-0.498264	1.3622	0.575824	0.106851
Leaf_Cluster_C (1155)	Seita.8G033400	-0.609076	-0.590124	-0.442384	-0.689256	-0.207732	-0.167512	-0.752536	-0.815102	-0.69334	-0.367014	-0.435644	-0.697022	1.66985	0.831148	3.21837	-0.0789256	-0.429084	-0.362419	-0.493979	-0.515173	-0.738518	1.03508	1.07396	1.25643
Leaf_Cluster_C (1155)	Seita.8G051600	0.460491	-1.71468	0.0215023	-1.03913	-0.323604	-0.529821	-0.651767	-0.392812	-0.244499	-1.32241	-1.29508	-1.19887	3.11823	0.785451	0.625352	0.145788	-0.037233	0.248122	0.365467	0.509751	0.712234	0.336072	0.568339	0.853103
Leaf_Cluster_C (1155)	Seita.8G067500	-0.14646	-0.456063	-0.256764	-0.36149	-0.168302	0.324474	-0.940688	-0.247136	-0.486816	-0.90766	-1.0318	-0.911637	1.32655	1.41925	0.767697	-0.797321	-0.964239	-0.681111	0.0861155	-0.196165	-0.757816	2.76308	1.78483	0.839468
Leaf_Cluster_C (1155)	Seita.8G069000	-0.0846166	0.622809	-0.914084	-0.530855	-0.30187	-0.92001	-0.664438	-1.43857	-0.861797	-1.16496	-1.70515	-1.29521	1.5342	2.00203	0.230001	1.11071	0.845274	0.775811	0.0692968	1.21709	0.685174	0.461875	-0.125165	0.452455
Leaf_Cluster_C (1155)	Seita.8G075200	-0.488303	-0.648417	-1.13313	0.43371	0.524653	0.2469	-1.69894	-0.847358	-0.584921	-1.55365	-1.26283	-0.91404	1.28281	1.44713	0.0349495	0.897226	1.51836	1.15009	-1.17764	0.100511	0.169331	0.726369	1.02211	0.755087
Leaf_Cluster_C (1155)	Seita.8G118200	0.237135	1.28097	-0.484225	-0.904343	-0.263909	-0.212816	-1.72655	-0.751853	-1.32574	-0.845357	-1.25077	-0.842289	1.60047	1.71424	0.591838	0.94647	0.993688	1.47166	-0.626979	-0.638672	-0.419764	0.543318	0.813302	0.10017
Leaf_Cluster_C (1155)	Seita.8G121800	0.0771708	0.694444	-0.261133	0.0417349	0.375187	0.540273	-0.733852	-0.712963	-1.09518	-1.26578	-1.80605	-2.04655	1.84328	1.47482	0.501119	-0.480261	-0.456481	0.64393	1.19506	1.277	0.852796	0.00938776	-0.225329	-0.44261
Leaf_Cluster_C (1155)	Seita.8G122400	0.324103	-0.589813	-0.0668285	-0.279666	-0.186379	-0.391082	0.650189	-0.093461	0.0427069	-1.84938	-1.97476	-1.88397	1.43152	1.29122	1.85776	0.11782	0.150372	0.718784	-0.339069	-0.253491	-0.718379	1.06245	1.17875	-0.199388
Leaf_Cluster_C (1155)	Seita.8G127000	-0.278653	-0.89456	-0.612756	-0.0740064	-0.419029	-0.865524	-0.977066	0.0340593	-0.281053	-1.98428	-1.48585	-1.65635	1.61578	1.13194	0.253144	0.30324	0.265357	0.111751	0.376368	0.54425	0.754088	1.4182	1.21475	1.50621
Leaf_Cluster_C (1155)	Seita.8G140400	0.537152	0.647676	0.515106	0.459414	0.818106	0.698581	-1.50991	-1.17512	-1.00107	-1.7013	-1.24733	-1.98863	1.43249	1.42235	0.426835	0.198967	1.04723	1.29182	-0.534192	-0.343454	-0.274071	-0.0238995	0.191272	0.111982
Leaf_Cluster_C (1155)	Seita.8G179300	0.340465	0.856318	-0.253165	-0.0687526	0.164558	0.0361199	-0.708711	-0.700285	-0.60953	-1.35024	-1.25549	-1.43434	2.80327	2.35039	1.02829	-0.59459	-0.51332	-0.0393461	0.199447	0.00136668	0.189056	-0.00719215	-0.262737	-0.171583
Leaf_Cluster_C (1155)	Seita.8G186900	0.808525	0.987761	0.287086	-0.499704	-0.21952	-0.655738	-0.349443	-1.08232	-0.692006	-1.98364	-1.84082	-1.81752	1.75977	1.60127	1.26756	0.472334	0.492052	0.487603	0.0704983	0.291753	0.0884558	0.186628	0.159622	0.179806
Leaf_Cluster_C (1155)	Seita.8G191600	0.0789516	0.60878	-0.378304	-0.201988	-0.336349	-0.261739	-1.46013	-0.975715	-1.49398	-0.916164	-0.772603	-1.2453	2.48709	2.27605	0.810448	0.268241	0.0913583	0.121305	-0.210165	-0.325925	-0.268301	0.779062	0.408629	0.916739
Leaf_Cluster_C (1155)	Seita.8G222900	0.398092	0.36671	0.249841	-1.22813	-1.12707	-0.209262	0.278353	-0.125359	0.14043	-1.91545	-1.30535	-1.3498	0.761258	1.79693	0.445796	-0.649439	-0.365856	-0.352116	1.41271	1.77558	1.54529	-0.0800091	0.0664535	-0.529601
Leaf_Cluster_C (1155)	Seita.8G243700	0.274776	0.498592	0.169431	-0.816427	-0.690233	-1.24799	-0.606862	-0.436202	-0.332961	-0.174681	-0.75309	-1.1996	0.0985917	0.63318	0.935921	-1.22083	-0.602865	-1.044	0.199947	-0.157327	0.41485	1.41878	2.30679	2.3322
Leaf_Cluster_C (1155)	Seita.8G247500	-0.806361	-0.234332	-0.806361	-0.806361	-0.806361	-0.806361	-0.507975	-0.652999	-0.750778	0.507364	-0.806361	0.0686693	1.18932	-0.0678684	1.2365	-0.806361	-0.806361	-0.806361	-0.505088	2.34062	0.168517	1.82343	1.15032	1.49155
Leaf_Cluster_C (1155)	Seita.9G002500	0.89522	1.24551	1.0151	-1.02565	-0.590087	-0.734096	-1.00069	-0.587317	-1.17129	-0.922198	-0.791454	-1.32706	1.72138	1.7754	1.98651	-0.437451	-0.611638	0.230089	-0.123852	-0.0027206	-0.685476	0.109864	0.593823	0.438083
Leaf_Cluster_C (1155)	Seita.9G004100	0.258433	-0.751575	-0.364816	-0.703792	-0.587505	-1.09296	0.675895	0.712773	0.546074	-1.04886	-0.308909	-0.4982	1.62054	1.43822	0.543534	0.0768052	-0.0713316	0.00600171	-1.7251	-1.7251	-0.91055	1.40432	1.80026	0.705839
Leaf_Cluster_C (1155)	Seita.9G006800	0.365116	-0.483148	-0.0642995	0.0346932	-0.373874	-0.637991	-1.16738	-0.232501	-1.31171	-1.6585	-1.16284	-0.962958	2.09303	2.40476	1.79683	0.316525	-0.0967021	0.283336	0.131542	-0.0336447	0.395856	-0.152238	0.259793	0.256311
Leaf_Cluster_C (1155)	Seita.9G057400	-0.462899	-0.617077	-1.45671	-0.289133	-0.0572479	-0.30631	-0.882371	-0.965563	-0.96261	-1.32148	-1.7052	-0.981232	1.89522	1.72449	-0.101842	0.655845	0.613427	0.439904	0.369877	0.611889	0.61323	1.08884	1.03452	1.06244
Leaf_Cluster_C (1155)	Seita.9G058300	-0.271423	-0.674679	-1.0296	0.915456	0.658222	0.755238	-1.4909	-1.0881	-1.01839	-1.24415	-1.47159	-0.486822	1.66091	0.300038	1.17341	0.865307	0.921231	0.390744	-1.14447	-0.35654	-0.442564	1.54273	0.827197	0.708739
Leaf_Cluster_C (1155)	Seita.9G065200	0.0339703	0.28872	-0.830843	-0.198469	-0.398717	-0.28034	-1.64461	-0.700921	-1.19985	-1.19114	-1.59373	-1.19186	2.39575	1.87237	0.779347	0.471696	0.153077	0.433787	0.247036	0.357716	0.253341	0.648304	0.906447	0.388916
Leaf_Cluster_C (1155)	Seita.9G078200	-0.45424	-0.53765	-1.71885	0.371433	-0.0690665	0.336182	-0.989937	-0.413895	-0.736019	-1.75142	-2.05597	-0.740698	1.74601	0.854816	0.253764	1.25727	0.592038	1.30152	0.255939	0.25013	-0.199574	1.09895	0.717003	0.632261
Leaf_Cluster_C (1155)	Seita.9G093500	-0.0101847	-0.874468	0.18683	-0.790906	-0.894104	-0.526288	-0.955481	-0.73745	-1.20488	-1.20488	-1.18942	-1.20488	1.12278	1.31964	1.26194	0.198752	0.179175	-0.0590994	-0.0137787	0.528941	0.0972203	1.43879	2.25416	1.07758
Leaf_Cluster_C (1155)	Seita.9G097200	-0.410729	0.1124	0.662974	-0.0246881	-0.398133	0.0491214	-1.45793	-0.926056	-0.989545	-1.02891	-1.44582	-1.11005	0.124755	0.969621	2.22031	1.34556	1.45032	1.32701	-0.249968	-0.487145	-0.711137	-0.225762	1.2071	-0.00331158
Leaf_Cluster_C (1155)	Seita.9G106000	-0.787147	-0.0372696	-0.640669	-0.856095	-0.564442	-0.767296	-0.606939	-0.744392	-1.25595	-1.37682	-1.39626	-1.57756	1.36105	1.86201	0.94868	0.237505	0.440004	0.741538	0.508257	0.767483	1.22857	0.91309	0.814624	0.788043
Leaf_Cluster_C (1155)	Seita.9G109600	0.221003	-0.573086	-1.24506	0.0962325	0.0531665	1.09883	-1.02528	-0.755447	-0.553529	-1.60352	-1.35978	-1.61302	1.1029	0.695739	0.864604	0.141724	-0.260824	0.312145	-0.15599	-0.36955	0.154401	1.03553	1.76296	1.97586
Leaf_Cluster_C (1155)	Seita.9G111200	0.437053	0.0305282	-1.03862	-0.110331	0.127848	-0.000639592	-0.989798	-0.986857	-0.759195	-1.7651	-1.23922	-1.05748	2.57667	2.04374	-0.239187	0.319258	0.772306	0.445576	-0.331421	-0.159722	-0.158105	0.623128	0.822743	0.636821
Leaf_Cluster_C (1155)	Seita.9G120000	-0.336064	-0.395066	-0.45652	0.451737	-0.293042	0.0923953	-0.738938	-0.777797	-0.671413	-1.18482	-2.50615	-1.5284	1.84494	1.14617	1.67402	1.04175	0.500567	0.766658	-0.133584	-0.173733	-0.113075	0.708836	0.469536	0.611997
Leaf_Cluster_C (1155)	Seita.9G135200	-0.480513	-0.602491	-0.144268	-1.16233	-0.701341	-1.03045	-0.487424	-0.919132	-1.04266	-0.709747	-0.857262	-0.809801	1.53832	1.06427	1.31971	-0.150748	-0.83512	-0.565582	0.990608	0.579869	0.659972	0.830857	2.26452	1.25075
Leaf_Cluster_C (1155)	Seita.9G142500	0.227882	-0.391897	0.561798	-0.217728	-0.366232	1.06525	-1.44412	-0.049081	0.431457	-1.83625	-1.38689	-1.62977	0.801915	0.382509	0.164123	-0.362443	-0.955119	0.83655	1.3654	1.01222	-0.676905	1.71594	1.3253	-0.573897
Leaf_Cluster_C (1155)	Seita.9G162900	-0.290038	0.217332	-0.626117	-0.773723	-1.37005	-0.859454	-0.928029	-0.21662	-0.9819	-0.806775	-1.00262	-0.341157	0.520258	1.07865	2.16883	-0.739444	-0.498203	0.666228	0.519086	0.066743	-0.52698	1.9628	1.49098	1.2702
Leaf_Cluster_C (1155)	Seita.9G172300	-0.751136	-0.396156	-0.610251	-0.753974	-0.988635	-0.757921	-1.47853	-0.851947	-0.907525	-0.497762	-0.788699	-0.259432	2.06121	0.57707	1.30881	0.07019	0.678107	-0.515547	-0.176414	-0.0145459	0.510293	0.900292	1.40158	2.24092
Leaf_Cluster_C (1155)	Seita.9G191400	-1.11152	0.318933	-1.02571	-0.358187	-0.569672	0.205012	0.134614	-0.342281	-0.0647808	-1.14532	-1.07104	-1.41391	2.43446	0.228828	1.09009	1.38232	0.836541	-0.338734	-1.05238	-0.313419	-0.873114	1.40328	1.23157	0.41441
Leaf_Cluster_C (1155)	Seita.9G195100	-0.0815887	-0.773125	-1.39457	0.19584	0.328881	0.0544445	-0.871626	-1.18282	-0.592232	-1.19117	-1.61337	-1.11399	1.77389	1.3194	0.635754	-0.0675388	-0.477192	0.923217	-0.052482	0.366949	-0.282905	1.71491	1.4726	0.908721
Leaf_Cluster_C (1155)	Seita.9G200500	-0.200545	-1.05734	-0.74064	0.532655	0.523925	-0.0295651	-0.389484	-0.68936	-0.415119	-0.852622	-0.124156	-1.3169	1.56452	1.3902	0.95794	-0.65628	-1.12297	-1.14359	-0.129662	-0.72769	-0.402584	1.73756	1.55775	1.73396
Leaf_Cluster_C (1155)	Seita.9G204100	0.790459	0.81918	0.400382	0.0893478	-0.534414	0.119211	-0.532899	0.331353	0.102542	-1.7698	-2.99947	-1.95069	1.22263	0.91917	0.67307	0.310248	0.384756	0.14826	0.797132	0.784164	0.502365	0.0298185	-0.0613103	-0.575507
Leaf_Cluster_C (1155)	Seita.9G206400	-0.370923	-0.484636	-0.238919	0.925374	0.681778	0.784349	-1.54447	-1.60552	-0.885606	-1.29926	-1.44369	-1.73272	1.49697	0.828719	0.639611	1.04991	0.601279	0.990569	-0.213085	0.475637	-0.744952	0.653064	0.868917	0.567598
Leaf_Cluster_C (1155)	Seita.9G220200	-0.48704	-0.129132	-0.767568	0.582459	0.517124	0.836089	-0.96832	-0.739277	-0.551719	-1.96278	-1.02887	-1.85404	2.03983	1.38597	0.75183	-0.338774	-0.608406	0.104297	0.0974598	0.233891	-0.300787	1.15679	1.10499	0.925974
Leaf_Cluster_C (1155)	Seita.9G224100	-0.30651	-0.0954616	-1.24091	-0.132698	-0.453697	-0.622628	-1.31867	-0.819228	-0.734768	-0.760348	-1.81292	-0.890124	1.55138	2.75942	0.764795	0.0995882	0.300916	0.701524	0.482865	0.599285	0.209536	1.03385	0.360967	0.323842
Leaf_Cluster_C (1155)	Seita.9G228200	-1.71034	0.188508	-0.571098	-1.71034	0.910356	0.851141	-1.71034	-0.00649293	-0.116899	-1.71034	0.119206	0.0135045	1.38987	1.12138	0.00666688	0.699443	0.507955	0.644163	0.194792	-1.71034	0.138346	0.865451	0.811882	0.783545
Leaf_Cluster_C (1155)	Seita.9G260300	0.279221	-0.583994	-0.153682	-0.016808	-0.32101	0.580531	-0.540322	-1.06592	-1.26149	-2.2277	-1.78013	-1.3374	0.805151	1.11939	1.48949	1.03484	0.104227	1.11939	-0.213748	0.923694	0.253961	-0.0699454	1.0323	0.829952
Leaf_Cluster_C (1155)	Seita.9G272800	0.184505	0.311318	0.0213862	0.280909	0.127144	0.220246	-1.46869	-1.22603	-1.32293	-0.993211	-1.40061	-1.15346	1.41994	1.05008	0.713086	1.6282	1.67477	1.61906	-0.249409	-0.185706	-0.97169	-0.054887	0.250199	-0.474227
Leaf_Cluster_C (1155)	Seita.9G276200	0.100984	-0.0614824	0.311348	0.150313	1.08998	0.329895	-1.16675	-1.09461	-0.854202	-1.13903	-0.907525	-0.96396	2.43444	2.07735	1.23583	0.387658	-0.0244764	0.853372	-0.839059	-0.687195	-1.08757	0.0962131	-0.424501	0.182965
Leaf_Cluster_C (1155)	Seita.9G371700	-0.133619	-1.0034	-0.339131	0.037364	0.449812	0.373755	-0.37969	-0.658436	-0.474163	-1.65784	-1.45642	-1.31433	0.769065	1.17653	0.476176	-1.20253	-1.26364	-0.144694	0.957443	0.932662	0.349126	1.79327	1.51046	1.20222
Leaf_Cluster_C (1155)	Seita.9G408800	-0.233597	0.0231168	-1.88119	-0.326564	-0.323648	-0.0242363	-0.612371	-0.332823	-0.852605	-1.74691	-1.43343	-1.62178	1.8	1.61003	-0.126465	1.03133	0.73431	0.692051	0.483381	0.526617	0.544982	0.893364	0.496754	0.679664
Leaf_Cluster_C (1155)	Seita.9G439800	0.0468538	0.31121	0.221255	-0.689023	-0.456107	-0.0120748	-1.50192	-1.19832	-1.07923	-1.43619	-1.31297	-1.7413	1.46224	1.63224	1.6304	0.358174	0.392771	0.763655	0.776546	-0.0838116	-0.178806	0.793977	0.807789	0.492646
Leaf_Cluster_C (1155)	Seita.9G441800	-0.466888	-0.400194	-0.165557	-1.70571	-1.70614	-0.679377	3.05803	-0.39948	0.0443891	-1.0786	-0.662477	-0.654082	0.438548	0.90975	0.456135	1.09426	-0.513909	-0.45936	0.577035	0.0498989	0.282965	0.493596	0.971439	0.515734
Leaf_Cluster_C (1155)	Seita.9G464300	0.0965155	0.512101	-0.955459	-0.055854	-0.0969486	-0.306684	-0.347676	-0.128553	-0.241474	-0.631426	-0.904272	-3.12853	1.5841	1.46578	0.189139	0.349029	0.77412	0.655313	0.303522	0.590732	-1.68412	0.896228	0.6268	0.437614
Leaf_Cluster_C (1155)	Seita.9G464400	-0.819025	-0.779759	-1.04398	0.259913	0.210653	-0.264688	-1.55932	-0.634117	-1.13078	-0.866748	-1.30359	-1.18833	1.75088	0.966525	-0.115131	0.628665	0.947212	0.606639	-0.579673	0.309821	0.373993	1.08994	1.80327	1.33764
Leaf_Cluster_C (1155)	Seita.9G468300	0.186964	-0.851789	-1.08014	-0.741239	-0.298386	-0.150276	-0.549055	-0.27287	-0.651893	-0.849526	-0.349751	-1.10741	2.7051	1.36568	-0.398289	-0.334451	-0.745569	0.174121	0.229272	-0.563663	-0.278005	1.26989	1.75672	1.53455
Leaf_Cluster_C (1155)	Seita.9G469600	-0.684645	0.175665	0.604241	0.243704	0.489227	0.90642	-1.26662	-1.18749	-1.34152	-1.46642	-1.86276	-1.35191	1.59982	1.81543	1.0308	1.26727	0.150062	0.325453	0.113911	0.232318	-0.0125313	0.177258	-0.00472574	0.0470404
Leaf_Cluster_C (1155)	Seita.9G475200	-0.375387	0.145583	-0.38037	-1.21135	-1.24445	-0.994826	-0.650737	-0.603301	-0.529856	0.367588	0.0719116	0.221487	2.00952	1.95414	0.385343	1.10103	0.975963	1.60846	0.548287	-0.119496	-1.00518	-0.120199	-0.36545	-1.78871
Leaf_Cluster_C (1155)	Seita.9G480100	-0.494062	0.160936	-0.565826	-0.0780108	-0.24548	-0.13303	-0.374519	-0.163454	-0.0800305	-0.650444	-1.01379	-0.809567	1.5319	0.841841	0.349535	-0.902091	-0.653766	-1.45196	-0.83535	-0.197597	-0.359146	1.72289	2.18413	2.21688
Leaf_Cluster_C (1155)	Seita.9G484600	-0.233396	-0.400774	0.105844	-0.376811	-0.513092	-0.478485	-0.80406	-0.980071	-1.15556	-0.964866	-1.22566	-1.23774	1.51812	1.69389	2.57444	0.0449428	0.646828	0.682192	-0.459731	0.0281902	-0.635689	0.25132	1.06371	0.856457
Leaf_Cluster_C (1155)	Seita.9G492500	0.139941	1.30293	-0.473811	-0.40408	-0.499808	-0.528161	-0.893864	-0.499767	-1.04675	-0.930696	0.231386	-0.862537	2.25793	-0.129188	2.20992	-0.502573	-0.810011	-0.130894	-0.0716526	-0.898415	-0.869168	0.795433	1.39925	1.21459
Leaf_Cluster_C (1155)	Seita.9G513600	-0.72678	0.289321	-1.15695	-0.194076	-0.06344	-0.468834	-1.05564	-0.759163	-0.644427	-1.41074	-1.47385	-1.35782	1.98665	1.71635	0.387474	0.343351	0.440557	0.38046	-0.0463894	0.127997	0.488051	0.563085	2.06959	0.565218
Leaf_Cluster_C (1155)	Seita.9G526700	0.141447	-0.223456	0.111699	-0.604112	-0.971922	-0.0804295	-0.808824	-1.25826	-0.210285	-1.29647	-1.78025	-0.827078	2.1514	0.527931	1.53156	1.26873	-0.828046	1.07504	-0.752372	0.678393	0.554838	0.0650779	0.23634	1.29905
Leaf_Cluster_C (1155)	Seita.9G531500	0.129157	-0.151789	1.054	1.40925	1.13574	1.33157	-1.81996	-1.36798	-0.496149	-1.43936	-1.22701	-1.30647	1.44136	0.158357	0.34453	-0.0900272	-0.202636	-0.210088	-0.240826	1.10317	-0.632471	-0.232712	1.42465	-0.114295
Leaf_Cluster_C (1155)	Seita.9G535600	-0.0559202	-0.578315	-0.870386	-0.122665	-0.755675	-0.226383	0.868774	1.22989	0.355427	-1.84347	-2.38995	-1.03315	0.841854	0.63028	0.564514	0.66349	-0.891087	0.000490511	-0.369903	-0.23376	0.338846	1.98146	1.01138	0.884258
Leaf_Cluster_C (1155)	Seita.9G569000	0.224851	0.020195	-0.175537	-1.53754	-1.28262	-0.375953	-0.701803	-0.969094	-0.879756	-1.19564	-0.548893	-1.20052	2.10367	1.14837	0.72871	-0.134096	-0.773598	0.492807	1.04931	0.577094	0.479996	1.46283	1.56374	-0.0765305
Leaf_Cluster_C (1155)	Seita.9G573300	-0.863489	-0.670088	-0.549657	-0.292051	-0.411838	-0.378294	-1.0294	-1.02505	-0.682583	-1.1277	-1.80704	-1.32926	1.77586	1.38021	0.332696	0.583925	0.556811	0.83293	-0.114006	0.577748	0.676565	0.518567	1.54326	1.50189
Leaf_Cluster_C (1155)	Seita.1G027600	0.188833	0.663669	-0.575036	-0.855628	-0.918187	-1.09339	-0.344959	-0.179694	-0.669553	-1.04387	-1.77482	-0.813503	2.64001	2.21964	0.219728	0.62842	0.77621	0.835187	-0.047863	0.041875	0.150271	0.143119	-0.424282	0.233816
Leaf_Cluster_C (1155)	Seita.1G062500	-0.202532	0.362374	-0.860754	-1.12603	-1.05488	-1.44238	-0.355752	-0.741092	-1.00557	-0.464113	-1.18892	-1.01933	1.86371	1.57918	0.20801	1.03277	0.823428	1.0477	0.871914	1.04276	1.32923	0.39807	-0.403237	-0.694548
Leaf_Cluster_C (1155)	Seita.1G084700	-0.302568	0.0412231	0.236796	-0.884078	-1.15738	-1.19472	-1.17524	-1.40117	-0.65849	-0.770917	-1.05353	-0.478631	1.94577	2.14548	0.746897	1.06153	1.2849	1.14176	-0.0610721	0.301271	0.437516	-0.482833	0.0894863	0.188009
Leaf_Cluster_C (1155)	Seita.1G138200	1.37824	0.830281	1.59398	-0.711326	-0.951218	-0.765154	-0.837485	-1.20822	-1.26161	-1.18097	-0.893984	-0.637497	1.50032	1.65735	1.93701	0.000388248	0.293279	0.342552	-0.56332	-0.206421	-0.326891	-0.225841	0.223251	0.0132935
Leaf_Cluster_C (1155)	Seita.1G168900	0.686192	1.42081	0.0698771	-0.311972	-0.525902	-0.94683	-1.51274	-0.770239	-1.34893	-0.760741	-1.13248	-0.765886	2.43808	2.0131	0.524488	0.715158	0.609083	0.544278	0.024584	0.162766	0.0960719	-0.22736	-0.348794	-0.652593
Leaf_Cluster_C (1155)	Seita.1G191000	0.0199406	-0.662289	0.0857311	0.503271	1.17027	1.52769	-0.250618	-0.271441	-0.689094	-1.27479	-0.323222	-1.46258	2.27823	1.24804	1.0393	-1.41013	-1.53764	-0.174008	0.740604	-0.399159	-0.289499	0.346689	0.589039	-0.804331
Leaf_Cluster_C (1155)	Seita.1G246700	-0.789271	-0.912594	-0.619621	-0.96024	-0.378355	-0.732131	-0.95496	-1.21213	-0.664112	-0.94781	-0.493074	-1.44757	2.44134	1.75354	0.402107	1.24898	0.653652	0.862786	0.228234	0.295814	0.484723	0.931995	0.430602	0.378104
Leaf_Cluster_C (1155)	Seita.1G286500	0.592566	0.644853	0.547363	-0.578713	-0.562954	-0.962936	-1.44062	-1.22371	-1.35512	-1.09888	-1.77174	-0.510079	1.35401	1.14864	0.988081	1.11154	1.68903	1.31296	-0.0664116	0.425848	0.295466	-0.258291	-0.0458036	-0.235096
Leaf_Cluster_C (1155)	Seita.1G315300	-0.891846	-0.7925	-0.891846	-0.483088	-0.435299	-0.307852	-0.633203	-0.732994	-0.735439	-0.800821	-0.805148	-0.891846	2.81655	2.42635	0.0213874	0.671685	0.855417	1.12014	-0.234402	-0.241186	0.110872	0.369969	0.417639	0.0674614
Leaf_Cluster_C (1155)	Seita.1G318800	-0.420806	0.0530066	-0.13643	-0.102456	-0.231577	-0.350732	-0.942948	-0.733548	-0.958864	-1.07266	-0.905876	-1.0554	2.80464	2.15843	1.06866	0.55766	0.847227	0.589118	0.350778	0.282443	0.41743	-1.01599	-0.537349	-0.664755
Leaf_Cluster_C (1155)	Seita.1G339200	0.944329	-1.30619	0.303208	-1.30619	-1.30619	-1.30619	0.0893205	-1.2477	1.13952	0.423723	-0.334786	-1.30619	0.833222	1.57013	1.33062	-0.244478	0.00910543	0.462539	0.764776	0.702324	-1.30619	1.43414	-0.508363	0.165507
Leaf_Cluster_C (1155)	Seita.1G372300	0.0585238	0.901446	0.268045	-0.829766	-0.432863	-0.0970454	-1.00181	-0.837522	-1.08641	-0.37833	-1.15183	-0.906169	2.43573	1.91281	1.15957	0.842014	0.989553	1.1175	-0.519787	0.0548581	-0.122092	-0.835784	-0.726791	-0.813849
Leaf_Cluster_C (1155)	Seita.2G079200	-0.0925414	0.980615	-1.26433	-0.953452	-1.19067	-1.03289	-1.08514	-1.08036	-1.34517	-0.190202	-0.536424	-0.11959	2.03907	1.97248	0.370362	1.01602	1.04464	1.34201	0.123843	-0.0954617	0.400584	-0.343538	0.276263	-0.236113
Leaf_Cluster_C (1155)	Seita.2G089200	-0.00625826	1.786	-0.0401429	0.149295	0.259836	0.0856554	-0.369711	-0.144945	-0.651192	-1.18403	-0.6625	-0.747788	1.29701	2.909	1.92283	-0.411131	-0.586373	-0.304034	-1.04432	-0.674727	-0.333505	-0.244105	-0.67709	-0.327774
Leaf_Cluster_C (1155)	Seita.2G090200	0.779632	0.871393	0.690313	-1.18762	-1.13258	-1.27038	-1.26595	-1.1467	-1.08512	0.731411	0.433155	0.714649	1.45137	1.37445	1.16205	-0.565404	-0.80399	-0.615025	-0.976346	-0.492481	-0.718496	1.1124	0.990117	0.949146
Leaf_Cluster_C (1155)	Seita.2G133500	0.511855	-0.153439	-0.103412	-2.20962	-1.55465	-1.82905	0.203157	0.591711	0.678339	-0.590264	-0.386019	-1.23864	0.628817	1.07277	0.338209	-0.00459541	-0.954363	-0.544858	0.321566	0.46131	0.724438	1.42102	1.42225	1.19347
Leaf_Cluster_C (1155)	Seita.2G140600	-0.0874133	0.359561	-0.54774	1.57624	1.45791	1.8608	-1.65591	-0.977513	-1.22579	-1.81791	-0.618907	-1.46088	0.770368	0.370787	0.10602	1.03966	0.644673	0.593112	0.389015	-0.1952	-0.377014	0.453068	-0.57868	-0.0782558
Leaf_Cluster_C (1155)	Seita.2G164500	-0.0180359	0.40094	-0.037982	-0.395901	-0.671304	-0.391737	-1.42315	-1.64439	-1.09797	-0.548021	-1.04356	-0.370886	1.50715	1.4457	1.13644	1.59428	1.83795	1.54278	-0.541296	-0.272258	-0.318418	-0.379198	-0.179082	-0.132051
Leaf_Cluster_C (1155)	Seita.2G196300	-1.07628	0.081666	-0.261438	0.154018	-0.975506	-0.587462	0.632332	-1.06524	-1.19178	-0.265032	-1.48566	1.10199	1.32307	1.21625	1.2542	1.51094	1.55911	1.24129	-0.389609	-0.573537	-0.376888	-1.22447	0.264138	-0.866124
Leaf_Cluster_C (1155)	Seita.2G201400	-0.973726	1.54794	-0.661187	0.881376	1.26341	0.649879	-0.332014	-0.259366	-0.282398	-1.15227	-0.965638	-1.3314	2.60156	1.7652	0.263583	-0.726318	-0.255995	-0.399377	-0.0908036	-0.998502	-0.10733	0.00900283	0.17147	-0.617088
Leaf_Cluster_C (1155)	Seita.2G232100	0.777749	0.750315	0.550192	0.617418	0.983446	0.565655	-0.496443	-0.38516	-1.34391	-0.928054	-1.65619	-1.43386	1.74267	1.97304	0.82676	-1.03552	-1.17414	-0.225116	-0.25954	-0.269264	-0.927085	0.8647	0.345338	0.137005
Leaf_Cluster_C (1155)	Seita.2G309200	-0.263352	-0.2536	-1.68499	-0.339981	-0.182429	-0.546105	0.188582	0.100595	-0.603719	-0.874276	-0.500129	-1.0508	2.01635	1.77826	0.234271	1.31875	1.55083	1.16713	0.418834	0.461381	0.326974	-0.710838	-1.2217	-1.33004
Leaf_Cluster_C (1155)	Seita.2G371400	-0.360874	1.06015	-0.564394	-0.253813	0.869577	-0.0350851	0.12064	-0.0277741	-0.527872	-0.356871	-0.5191	-1.22468	2.80746	2.45878	0.781613	-0.808074	-0.650238	-0.598723	-0.970978	-1.00429	-0.310695	0.547193	-0.187494	-0.244463
Leaf_Cluster_C (1155)	Seita.2G436100	-0.626826	-0.928213	-0.135342	-0.172663	0.0492445	-0.390848	-0.669462	-1.82374	-0.65122	0.203693	-0.73526	0.564015	0.37126	0.803052	1.13874	1.56265	0.912919	1.08613	-0.471484	-0.853858	-1.09639	2.65954	-0.825739	0.0298049
Leaf_Cluster_C (1155)	Seita.2G438100	-0.199898	-0.313035	-0.694843	-0.970958	-0.635111	-0.459013	-1.09571	-0.639616	-0.598961	-0.90396	-0.741935	-1.19735	2.29178	1.26892	2.12496	0.699228	1.12229	1.1581	0.128806	-0.672372	-0.787009	0.514186	0.139704	0.4618
Leaf_Cluster_C (1155)	Seita.3G010200	0.393114	0.361395	0.883255	-1.05725	-0.913879	-0.885978	-0.880394	-0.494737	-0.979041	-1.4401	-1.58834	-1.11843	1.66402	1.37062	1.13879	0.743516	0.69162	1.00871	0.94377	1.16156	0.400896	-0.013739	-0.617813	-0.771562
Leaf_Cluster_C (1155)	Seita.3G014900	0.370553	0.898584	-0.114659	-0.776303	-0.695417	-0.631523	-1.24703	-0.789796	-1.37703	-1.22786	-1.44641	-1.0571	2.00688	1.78595	0.973294	1.08635	0.875957	0.896676	0.0749603	0.380782	-0.218787	0.716979	-0.338872	-0.146189
Leaf_Cluster_C (1155)	Seita.3G060800	-0.388942	0.638511	-0.785917	-0.382577	-0.366869	-0.707506	-0.564478	-0.698751	-0.537083	-0.801332	-1.03645	-1.03559	1.89679	1.69374	0.649679	1.40984	1.60946	1.3549	0.525525	0.0848087	0.505052	-0.712282	-1.32846	-1.02208
Leaf_Cluster_C (1155)	Seita.3G062400	-0.572484	0.383552	-1.24833	0.648931	1.41563	0.580423	-1.67864	-0.895847	-0.865101	-0.0377391	-0.591154	0.229072	2.31981	1.61019	-0.3109	-0.981494	-0.947826	-0.840214	-0.36652	-0.119973	-0.368966	0.522999	1.05854	1.05605
Leaf_Cluster_C (1155)	Seita.3G084600	-0.579044	1.09322	0.897698	-0.820943	-0.645108	-0.55427	-0.712315	-0.683479	-0.583263	-1.16711	-1.46377	-0.847552	1.11833	1.61766	0.329993	0.70205	1.59957	1.13151	1.54564	0.886633	-0.392552	-0.649452	-0.853251	-0.970201
Leaf_Cluster_C (1155)	Seita.3G099500	0.68317	-0.0389189	-0.400437	-1.46068	-0.850143	-0.545372	-1.34616	-0.777471	-0.439835	-1.48897	-1.50647	-1.2291	1.40386	1.81342	0.67892	0.147077	0.530369	0.727565	0.757124	1.26483	1.26354	0.236294	0.470118	0.10728
Leaf_Cluster_C (1155)	Seita.3G144900	-0.373169	0.80255	-1.2259	-0.407392	-0.23825	-0.927771	-0.470093	-0.283511	-1.20523	-0.856939	-1.55156	-1.1306	2.39613	1.97541	0.673854	1.16778	0.803584	0.691511	0.407238	0.119911	0.416658	0.122674	-0.240196	-0.666698
Leaf_Cluster_C (1155)	Seita.3G147000	0.636019	0.306103	0.861143	-1.87281	-1.29798	-1.27366	-0.817211	-0.992995	-1.32672	-0.808286	-1.02149	-0.905295	0.990209	1.09153	1.79527	0.620323	0.586475	0.739879	0.907987	0.743299	0.866153	-0.312497	0.209802	0.274754
Leaf_Cluster_C (1155)	Seita.3G182000	-0.216548	0.755723	-0.353878	-1.02969	-1.11955	-0.606199	-0.880359	-0.41678	-1.39893	-0.821253	-0.803254	-0.94832	2.16847	1.63302	1.2454	1.10777	0.339277	0.133139	1.3694	0.403344	0.88895	0.139011	-0.619206	-0.969541
Leaf_Cluster_C (1155)	Seita.3G188800	-0.547986	-0.702914	0.561573	-1.10779	-0.732706	-0.214197	-0.786339	-0.859984	-1.6003	-0.819052	-1.35569	-0.628717	1.14341	1.40882	1.93582	1.38251	1.54538	1.00714	-0.100094	0.36857	-0.703969	0.0975986	0.383985	0.324928
Leaf_Cluster_C (1155)	Seita.3G199400	-0.151097	-0.123852	-0.473279	-0.734119	-1.07652	-0.771436	-0.424705	-0.382402	-1.22633	-0.53822	-1.51466	-0.717404	1.8081	1.14141	1.79673	1.56397	1.31621	0.914557	0.77325	0.579414	-0.035084	-0.00136365	-1.23657	-0.4866
Leaf_Cluster_C (1155)	Seita.3G212700	-0.0235246	0.657497	-1.10034	-0.819285	-0.441537	-0.180023	-1.03642	-0.708905	-1.48151	-1.425	-1.34341	-0.545691	1.99991	1.70896	0.630164	1.70084	0.553426	1.225	-0.369568	0.358817	0.102267	0.0676201	0.504462	-0.0337621
Leaf_Cluster_C (1155)	Seita.3G224700	0.411239	2.46628	-0.468127	-1.20626	-1.34534	-0.0913682	-0.280348	-0.0445581	0.257339	-0.684783	-0.993264	-0.814581	1.912	0.701665	0.522923	1.52695	0.847914	0.653201	-0.58803	-0.767899	-0.931738	0.407621	-0.673922	-0.816915
Leaf_Cluster_C (1155)	Seita.3G226600	-0.159999	1.38486	-0.37119	-0.428898	-0.651258	-1.88762	-0.774256	-0.402643	-0.798846	-0.125493	-1.3775	-0.201178	2.09576	0.613906	1.33581	1.33357	0.841543	0.127007	-0.901972	-0.635937	-1.17702	0.960498	0.387112	0.813748
Leaf_Cluster_C (1155)	Seita.3G243100	-0.545295	1.35109	-0.404763	0.335567	0.231524	0.779393	-0.0810898	-0.335869	-0.568881	0.0694399	-0.902859	-0.627821	3.02974	1.65083	0.708379	-0.75159	-0.872106	-1.21222	-0.983882	-0.717137	-0.99067	0.757885	-0.101133	0.181471
Leaf_Cluster_C (1155)	Seita.3G244100	-0.0854049	0.525454	-0.28736	-1.39212	-1.84152	-1.09573	-0.40813	-0.722055	-1.6449	-0.0498861	-0.154141	-0.951146	1.82509	0.0329345	1.51802	1.55257	0.717128	0.666287	0.135955	0.529932	-0.232347	1.47115	-0.409086	0.299317
Leaf_Cluster_C (1155)	Seita.3G260900	0.648462	0.437792	0.327698	-0.458037	-0.279732	-0.53793	-1.23268	-1.20882	-1.18167	-0.104907	-0.853766	-0.601899	2.17974	1.75379	1.83467	0.388211	0.591927	0.572163	-0.990131	-1.0976	-1.27049	0.444473	0.292642	0.346109
Leaf_Cluster_C (1155)	Seita.3G316000	-0.0908063	0.561283	-0.694851	-0.620342	0.397438	-0.240216	-0.177471	1.00734	-0.182699	-0.453324	-0.144081	-0.417707	2.94857	1.9431	0.075461	-1.58885	-1.38442	-0.924226	-0.015616	-1.08922	-0.0614746	-0.125099	0.238157	1.03905
Leaf_Cluster_C (1155)	Seita.3G381300	0.0555756	1.0774	-0.211545	0.516322	0.318943	-0.0123223	-0.829402	-0.645727	-0.897204	-0.405622	-0.206687	-0.511564	2.70262	2.582	0.962818	-0.891153	-1.02719	-1.27386	-0.412395	-0.272803	-0.559157	-0.296809	0.13783	0.0999434
Leaf_Cluster_C (1155)	Seita.3G389200	0.855316	-2.29124	-1.8867	0.702715	0.148578	0.666285	-0.235124	0.221294	0.212984	-1.02438	-1.27806	-0.475785	1.17798	1.2591	0.895188	-0.771737	-1.59865	-0.292446	0.741167	0.445019	0.844203	0.634377	0.43647	0.613444
Leaf_Cluster_C (1155)	Seita.3G409600	-0.260886	-0.159424	-0.750933	-0.787991	0.0932707	0.177147	-0.643491	-0.144319	-0.232567	-0.536983	-0.713921	0.35915	1.36615	1.86012	1.01812	-1.02996	-2.04775	-2.01508	0.0343193	0.342854	0.650155	0.929964	1.05041	1.44165
Leaf_Cluster_C (1155)	Seita.4G006900	0.211428	0.836353	0.127867	-2.79946	-0.369848	-1.61444	0.162864	-0.851473	-0.536575	-0.00348609	0.418047	-0.0693552	2.13049	1.32725	0.870714	0.221905	0.37031	-0.0316781	0.449111	-1.50738	-0.142382	0.809744	0.14376	-0.153756
Leaf_Cluster_C (1155)	Seita.4G021300	0.232234	-0.163272	1.5912	-1.6247	-1.58956	-1.35552	-0.181135	-0.416996	-0.435576	-0.651224	-1.33697	-0.896765	0.665343	0.540445	2.60408	0.701023	0.470085	-0.0858956	0.468135	-0.142979	-0.37854	0.713872	0.507326	0.765393
Leaf_Cluster_C (1155)	Seita.4G034700	0.319459	0.422269	0.204253	-1.28421	-1.69739	-1.71938	-0.899487	-0.652907	-1.06385	-0.736165	-0.991099	-0.227205	1.60242	1.48201	1.64294	0.0810377	-0.334521	-0.10448	1.06301	0.677248	0.575092	1.29167	0.116287	0.233012
Leaf_Cluster_C (1155)	Seita.4G072800	-0.015139	-0.244055	0.972205	-2.26928	-2.05009	-1.895	-0.00353612	0.1591	0.0399711	-0.25822	-0.886666	-0.382272	1.2999	0.930105	1.98296	0.10025	0.0624727	0.59217	0.813203	0.537846	0.295562	0.174702	0.250591	-0.20678
Leaf_Cluster_C (1155)	Seita.4G112000	0.166729	-0.274745	-0.150295	-0.694051	-0.739428	-1.611	-1.25912	-1.13599	-0.785942	-0.473606	-0.432975	-0.520509	2.42367	1.6444	0.859496	1.27826	1.36358	1.34648	-0.117232	-0.105352	0.0140054	-0.0483383	-0.106	-0.642027
Leaf_Cluster_C (1155)	Seita.4G112200	-0.384693	-0.110068	-0.518461	-1.07418	-1.11901	-0.686688	-0.440215	-0.788454	-1.15628	-0.694831	-0.876303	-1.20109	2.83344	1.03483	0.998188	1.02032	0.93631	0.977725	0.30359	1.1999	0.264045	0.0859493	-0.0934622	-0.510561
Leaf_Cluster_C (1155)	Seita.4G173400	-0.892006	0.797652	-0.916771	0.820403	0.920394	0.512285	-0.453486	-0.512407	-1.20994	-0.336922	-0.963198	-0.678409	2.41822	1.59203	0.922972	-0.0634617	-0.148338	-0.406294	-1.44209	-1.3653	-0.713319	0.932684	0.767411	0.417893
Leaf_Cluster_C (1155)	Seita.4G177800	0.609267	0.775071	-0.0413118	-0.102977	-0.0738404	0.223571	-1.15181	-1.62286	-1.30297	-0.197775	-0.531905	-0.0261683	1.3126	1.29245	0.346403	1.54989	1.35181	1.54844	-1.39726	-1.39107	-1.24112	-0.0375478	0.503884	-0.394774
Leaf_Cluster_C (1155)	Seita.4G195900	-0.0605219	0.370785	-0.00727216	-0.411003	-0.645044	-0.73588	-0.751183	-1.14214	-0.982208	-1.40321	-1.08469	-0.620532	2.09788	1.14822	1.23221	1.91839	-0.0378492	1.89109	0.210277	0.0503141	-0.277606	0.305555	-0.323521	-0.742051
Leaf_Cluster_C (1155)	Seita.4G225400	0.491323	0.00295967	0.356208	-1.60447	-1.75704	-1.7721	0.0978445	-0.771177	-0.27751	0.71376	-0.217257	-1.7121	0.587236	0.826422	1.31308	1.39966	0.0477995	0.672329	-0.249269	0.577471	-0.377256	1.95576	0.0557756	-0.359452
Leaf_Cluster_C (1155)	Seita.4G236500	0.983478	1.79847	0.0886342	-0.679923	-0.976716	-0.936567	-0.611863	-0.852088	-0.834258	-0.818859	-1.15239	-1.33511	2.50365	0.555296	0.397393	0.780586	0.513174	0.840973	0.20966	0.816233	0.713801	-0.495691	-0.791172	-0.716713
Leaf_Cluster_C (1155)	Seita.4G279000	0.144317	0.857432	-0.540841	-0.710765	-0.387376	0.209565	-0.751047	-0.61804	-1.31228	-1.12078	-1.5249	-1.77008	1.92095	1.35514	0.824293	1.4751	1.33675	0.943397	-0.406777	-0.13628	-0.274327	0.482918	0.400761	-0.397142
Leaf_Cluster_C (1155)	Seita.5G015100	0.00698753	0.837912	-0.130432	-1.18839	-1.23914	-0.738666	-1.19311	-0.505774	-1.23537	-0.195453	-1.57467	-0.565275	1.07525	0.695126	2.11418	1.2613	0.771266	1.24242	1.28825	0.462176	-0.197911	0.334243	-0.615266	-0.709649
Leaf_Cluster_C (1155)	Seita.5G125300	-0.762762	-1.24063	-0.114203	1.22861	2.05766	0.180625	0.0019513	-0.96001	-0.636929	-0.970299	-0.788988	-0.20327	1.3317	2.729	0.69275	-0.619665	-1.07442	0.484433	0.13511	-0.013195	-0.206465	-0.378024	-0.658448	-0.214527
Leaf_Cluster_C (1155)	Seita.5G155300	-0.489849	-0.867668	-0.444147	-0.667412	-0.325481	-0.685097	-0.699505	-1.13711	-1.6178	-0.161618	-0.69868	0.382999	0.747123	0.402688	2.72441	1.69915	1.30543	0.321811	-1.00194	-0.212115	-0.29492	1.10612	-0.107597	0.721197
Leaf_Cluster_C (1155)	Seita.5G163700	0.495294	0.188196	0.485164	0.306328	-0.719712	-1.43775	-2.03154	0.223382	0.240168	0.699188	0.108832	-1.00399	0.50975	0.745439	1.17529	0.721653	0.607327	0.80518	-1.9256	-0.558743	0.546666	-2.05748	1.01899	0.857983
Leaf_Cluster_C (1155)	Seita.5G207000	0.164565	-0.515171	0.340902	-0.753825	-0.428413	-0.855945	-0.955823	-1.33931	-0.862773	-0.564527	-1.57187	-1.05311	1.71747	1.24922	1.27394	1.44392	1.46226	1.58906	0.540661	-0.269679	0.149782	-0.0565329	-0.0087416	-0.696063
Leaf_Cluster_C (1155)	Seita.5G230400	0.772018	-0.797667	-0.638461	-1.24293	-0.929512	-1.07366	0.116203	-0.139171	-1.40876	-0.884497	-0.694114	-0.944393	1.38672	1.90128	1.05101	0.934998	0.957231	1.62896	-0.117195	-0.458274	-0.407874	1.37225	-0.501482	0.11732
Leaf_Cluster_C (1155)	Seita.5G236100	0.407393	-0.210543	0.0625566	0.401083	0.00801115	-0.366237	-0.821719	-0.821719	-0.821719	0.611847	-0.821719	-0.821719	0.653033	1.83191	0.635029	1.7167	0.607147	2.68098	-0.821719	-0.821719	-0.821719	-0.821719	-0.821719	-0.821719
Leaf_Cluster_C (1155)	Seita.5G293700	0.208978	0.831321	0.726784	-1.52023	-1.35863	-0.905316	-0.900719	-0.826967	-1.11724	-0.899639	-1.05209	-0.965977	1.88417	1.60414	1.53562	1.07184	0.765336	0.540389	0.121667	0.455608	0.356218	0.159188	-0.235285	-0.479179
Leaf_Cluster_C (1155)	Seita.5G302700	0.206832	-0.422547	0.0488946	-1.3734	-1.35656	-1.05418	-1.07864	-1.16947	-0.827786	-1.38309	-0.947329	-0.494239	1.69592	1.69634	1.06873	0.878759	1.11465	1.11408	0.7903	0.666365	0.377587	0.0432121	0.534808	-0.12923
Leaf_Cluster_C (1155)	Seita.5G330700	0.318933	-0.198279	-0.355709	1.49583	1.63551	0.897411	-1.68277	-0.468386	-1.1107	-1.17128	-1.5427	-1.28676	1.2491	1.06205	1.31378	-0.0626125	-0.533711	-0.101984	-0.0449331	0.821301	-0.577782	1.0477	0.003726	-0.707761
Leaf_Cluster_C (1155)	Seita.5G348100	0.325853	1.83181	-0.520752	-0.212389	-0.634183	-0.174373	-0.970684	-0.970684	-0.970684	0.0867729	-0.970684	0.640354	1.32475	0.948803	1.89716	1.61549	0.805581	0.570306	0.230967	-0.970684	-0.970684	-0.970684	-0.970684	-0.970684
Leaf_Cluster_C (1155)	Seita.5G356000	-0.0555481	1.1154	0.265875	-1.40225	-0.94855	-1.52459	-0.271724	-0.44947	-0.739585	-0.219367	-1.20472	-0.962618	2.26178	1.68687	1.70198	0.237774	0.616251	0.337296	0.308137	0.517917	0.519451	-0.299755	-0.767433	-0.723122
Leaf_Cluster_C (1155)	Seita.5G358400	-0.0861692	0.442369	-0.72268	-1.14983	-0.442917	-0.835282	-0.674725	-0.553731	-1.06734	-0.303209	-0.74821	-1.38676	2.94796	2.31348	0.776526	0.159705	-0.093082	0.697966	0.334696	0.0501983	0.181362	0.318909	0.197763	-0.357008
Leaf_Cluster_C (1155)	Seita.5G371800	-0.452206	1.01482	-0.480071	-0.858901	-0.958296	-0.53706	-0.162118	0.363209	-0.676974	-0.587729	-1.15499	-0.828554	2.83674	1.55363	1.62205	1.16674	0.505058	0.227745	-0.347037	-0.40489	0.0476315	-0.279891	-1.11172	-0.497193
Leaf_Cluster_C (1155)	Seita.5G419400	-0.30481	-0.713147	-0.397915	-0.590069	-0.713147	-0.353354	0.51205	-0.570774	-0.713147	-0.713147	-0.713147	-0.713147	0.638316	0.623588	3.09631	2.00374	1.04967	0.950521	-0.713147	0.0299987	0.444192	-0.713147	-0.713147	-0.713147
Leaf_Cluster_C (1155)	Seita.5G442500	-0.357399	0.450022	-0.266531	-0.919311	-1.10423	-0.686567	-0.35702	-0.479816	-1.22098	-0.379478	-1.40491	-1.07104	1.36287	1.46835	1.33105	1.90431	1.73408	1.26561	0.123561	0.200886	-0.00217868	-0.492384	-0.66623	-0.432667
Leaf_Cluster_C (1155)	Seita.5G447700	0.539359	-0.239437	0.20589	-1.79333	-1.63833	-1.37962	-0.474233	-0.909507	-0.785417	0.00813813	-0.375077	0.353067	2.42853	1.37768	0.958101	1.11064	1.31014	0.692326	-0.319261	0.251746	-0.0832121	-0.252155	-0.550225	-0.435808
Leaf_Cluster_C (1155)	Seita.6G013400	0.357617	0.719939	-1.14625	0.0869682	1.17491	0.917228	-0.967269	0.249586	0.529166	-1.0304	-1.10291	-0.884511	2.60032	1.93997	-0.0110345	-0.567257	-0.825827	-0.275198	-1.25545	-0.819319	-0.502769	0.046206	0.194084	0.572194
Leaf_Cluster_C (1155)	Seita.6G013700	0.0347577	0.815912	0.0513104	-1.79466	-2.08828	-1.90821	-0.172272	-0.487819	-0.72197	-0.218546	-0.726982	-0.34344	1.7839	1.67324	1.32759	0.903175	0.747533	-0.224396	0.451137	0.118024	0.431014	0.196308	0.104009	0.0486732
Leaf_Cluster_C (1155)	Seita.6G026000	0.246689	1.06205	0.817442	-0.0513001	-0.315633	0.151254	-0.689393	-1.33127	-1.91308	-0.651145	-2.33437	-1.06189	1.04487	0.72916	1.03136	1.56108	1.36064	0.657997	-0.459116	0.208824	-0.0551708	0.427428	-0.506119	0.0696874
Leaf_Cluster_C (1155)	Seita.6G061600	-0.143087	-0.380891	0.0951415	-0.0906	0.580374	0.126776	-0.951003	-0.951003	-0.401154	-0.951003	-0.951003	-0.951003	0.271277	2.08044	0.750825	1.9944	1.76347	1.74681	-0.381392	-0.833355	-0.951003	-0.179832	-0.825601	-0.46759
Leaf_Cluster_C (1155)	Seita.6G128600	-1.05078	-0.15051	-1.14203	1.38229	1.4966	1.63553	-0.222463	-0.256266	-0.606111	-1.19529	-1.00779	-2.36356	0.768889	0.908169	0.0542541	-0.255722	0.190105	0.364813	0.757479	1.02457	1.11481	-0.488975	-0.557513	-0.400505
Leaf_Cluster_C (1155)	Seita.6G132600	-1.0439	-0.861769	-0.903455	-0.828222	-0.870658	-0.273179	-1.0439	-0.888115	-0.165138	-1.0439	-1.0439	-0.839431	2.46964	1.75406	0.590806	1.05184	1.31331	0.777948	0.35197	0.303728	0.293335	0.485991	0.685046	-0.272125
Leaf_Cluster_C (1155)	Seita.6G142300	0.279763	0.161946	0.267967	-1.34844	-1.28897	-1.25903	0.0363921	0.223343	0.355931	0.25679	-0.195665	0.255661	0.65026	0.742788	0.949896	-1.86179	-1.80429	-1.90641	0.733852	0.736552	1.08199	0.776875	1.10817	1.04642
Leaf_Cluster_C (1155)	Seita.6G155000	0.248496	0.01923	0.314096	-0.513546	-0.495356	0.0099425	-0.388866	-0.496345	-0.468552	-1.46552	-1.26748	-1.35109	1.1831	0.898338	1.46521	1.51613	1.64314	1.51824	0.290232	0.638538	0.140341	-1.02089	-1.22033	-1.19706
Leaf_Cluster_C (1155)	Seita.6G252400	-0.217868	-0.00620763	-0.958402	0.140198	0.340011	0.511493	-0.358404	-0.647096	-0.62046	-1.11932	-0.826849	-0.946641	2.40717	2.07936	0.0383519	-1.39056	-1.26712	-1.00208	1.24883	0.687299	0.434966	0.72304	0.0720718	0.67822
Leaf_Cluster_C (1155)	Seita.6G255200	-0.33407	-0.529404	-0.750975	-0.301297	-0.704868	0.38989	-1.27014	-1.26572	-1.51143	-1.27007	-0.670851	-0.207145	1.75552	0.662776	1.76518	0.755367	2.09934	1.31706	0.053044	-0.0351885	0.394228	0.0394605	-0.431045	0.050327
Leaf_Cluster_C (1155)	Seita.7G039500	-0.766355	-0.123328	-1.03461	-1.25122	-0.236477	-0.542303	-0.571457	-0.715819	-1.31639	-0.89589	-0.429882	-1.13706	2.57257	2.00643	0.399895	0.923501	0.600813	1.22827	0.23462	-0.00919337	0.719243	0.597825	0.0620324	-0.315206
Leaf_Cluster_C (1155)	Seita.7G099100	0.695597	0.146847	0.599003	-1.64253	-0.879124	-0.667252	-1.46781	-1.44404	-1.40513	-0.980309	-1.17588	-0.8368	1.07221	0.745523	1.88792	0.625817	0.825135	0.68366	0.515401	0.46616	0.00532147	0.828061	0.716026	0.686179
Leaf_Cluster_C (1155)	Seita.7G106000	0.457696	0.16687	-0.217879	-1.10114	-1.10143	-0.743014	-0.438149	-1.40295	-1.50309	-1.01216	-1.18026	-0.291718	1.81142	0.337139	0.802017	0.456382	0.69414	0.386533	0.00214122	0.30701	-0.331043	2.53509	1.11542	0.250981
Leaf_Cluster_C (1155)	Seita.7G117500	-0.474552	-0.433023	-0.558595	1.40115	0.629313	1.27722	-0.593481	-1.34049	-2.15586	-0.629057	-1.89123	-0.117138	0.807912	0.26441	1.10136	-0.161435	-0.419804	-0.365055	-0.0655613	0.626469	-0.00789684	2.04102	0.306893	0.757432
Leaf_Cluster_C (1155)	Seita.7G140600	1.05269	1.19552	1.05934	0.199182	0.400662	-0.0396256	-0.918253	-0.918253	-0.918253	-0.918253	-0.918253	-0.918253	0.789217	0.984861	1.10807	1.21389	1.69927	1.35597	-0.918253	-0.918253	-0.918253	-0.918253	-0.918253	-0.918253
Leaf_Cluster_C (1155)	Seita.7G177600	-0.762996	0.588174	-1.9121	-1.40253	-1.07171	-2.09929	-0.394098	0.124747	-0.251785	0.0191038	-0.550432	-0.138854	2.25222	1.48842	-0.260253	0.0530118	0.207123	0.53936	0.16601	0.824243	0.453579	0.945082	0.854526	0.328449
Leaf_Cluster_C (1155)	Seita.7G195700	1.57481	-0.498961	-0.987416	1.2898	1.1391	1.30892	-0.759769	-0.85909	-0.867077	-0.881013	-0.940251	-0.926985	1.62238	1.46908	1.12732	0.525569	0.547292	0.459527	-0.647858	-0.847442	-0.593721	-0.786494	-0.753994	-0.713727
Leaf_Cluster_C (1155)	Seita.7G225100	0.322963	0.186715	-1.1141	-0.180883	-0.0425075	-0.459723	-0.316993	-1.64131	-1.5701	-0.652826	-0.692516	-0.259724	1.68985	1.72043	-0.700806	1.45214	1.56678	1.6411	0.347351	0.0581405	-0.123058	-0.791163	-0.818121	0.378357
Leaf_Cluster_C (1155)	Seita.7G234500	-0.629917	1.25997	-0.675568	-1.53907	-1.08529	-0.711996	0.183695	0.701776	-0.849394	-0.354893	-1.56114	-1.32853	1.11973	0.937254	1.46468	0.625778	-0.317433	0.633336	-0.685081	0.509936	-0.30765	2.177	-0.00936442	0.442182
Leaf_Cluster_C (1155)	Seita.7G242800	-0.231873	-0.256138	-0.725746	0.589091	1.10882	0.893443	0.215995	-0.267972	-1.35106	-1.02023	-0.964376	-1.17085	2.80898	1.79689	0.187799	-0.409978	-0.722016	-0.388624	0.71977	0.738369	0.373661	-1.04829	-0.35582	-0.519841
Leaf_Cluster_C (1155)	Seita.7G249900	0.576457	0.322404	1.23322	-1.05839	-0.90138	-0.548091	-1.00949	-0.995013	-1.06857	-0.744278	-0.921842	-0.298713	2.08579	0.795595	1.56966	0.960797	1.5394	0.890913	-1.2171	-0.76373	-0.68761	-0.0868749	0.033882	0.292967
Leaf_Cluster_C (1155)	Seita.7G281500	-1.81551	-0.437928	-1.6203	1.07052	0.672648	0.744326	-0.793894	-0.866462	-0.75177	-0.673451	-0.459399	-0.285425	1.23501	0.529926	0.518722	0.357383	-1.54026	-1.39362	0.63271	0.966214	1.42681	0.736898	1.08103	0.665823
Leaf_Cluster_C (1155)	Seita.7G286100	-1.13917	0.618657	-0.876831	-1.11274	-0.681771	-0.415032	-1.08785	-0.819707	-1.058	-0.902213	-1.15952	-0.725813	1.53284	1.73549	1.75861	1.31447	0.985755	0.748711	0.846423	-0.093326	0.357678	-0.468768	0.215794	0.426311
Leaf_Cluster_C (1155)	Seita.7G288700	0.211873	-0.138689	0.0703139	0.0588564	0.200341	0.198558	-0.982831	-1.4381	-1.70112	-1.06527	-1.583	-0.781716	1.03715	0.812131	1.39359	1.78511	1.65912	1.5965	-0.384741	-0.0127731	0.0496412	-0.386491	-0.408141	-0.190317
Leaf_Cluster_C (1155)	Seita.7G301100	0.894348	1.29713	0.267029	-1.63321	-0.798048	-1.22851	-0.615841	-1.06284	-1.5586	0.329679	-0.996453	-0.417866	0.73548	1.40782	2.60009	0.623665	0.456594	0.179817	-0.24089	-0.303278	-0.154638	0.525376	-0.0888464	-0.217998
Leaf_Cluster_C (1155)	Seita.7G305200	-0.792748	0.263572	-1.09583	-0.255679	-0.195721	-0.663045	-1.1657	-1.34852	-1.15196	-0.783838	-1.41599	-0.697061	2.15052	1.17524	0.488947	1.34348	1.59951	1.34654	0.328343	0.483626	0.15781	0.361595	0.034639	-0.167714
Leaf_Cluster_C (1155)	Seita.7G322200	0.218839	-0.105063	-0.845461	-0.151452	-0.658921	1.105	-1.29889	-1.17693	-1.25751	-0.711225	-0.980582	-1.10766	1.51242	0.797463	0.947395	1.55199	2.11253	1.01104	-0.789079	-0.233443	0.0581262	-0.729101	0.423318	0.307192
Leaf_Cluster_C (1155)	Seita.8G034400	0.889207	0.777107	0.636199	-0.715653	-0.704645	-0.72027	-0.979874	-0.900368	-1.02712	0.536878	0.448511	0.588054	0.775938	1.276	1.06062	-1.19058	-1.33682	-0.903317	-0.992641	-0.826175	-0.934999	1.45058	1.60728	1.18608
Leaf_Cluster_C (1155)	Seita.8G084800	-0.689131	-1.33371	0.279285	1.12464	-0.00444492	1.4678	0.168408	-0.358608	-0.155053	-0.98533	-1.36108	-1.01212	2.38543	0.734215	-0.118537	-1.00805	-1.23331	-0.239381	1.68932	0.400411	-0.385797	1.0122	-0.437307	0.0601481
Leaf_Cluster_C (1155)	Seita.8G085200	0.0945031	0.506826	-0.387236	-0.913945	-0.737687	-0.867231	-0.932236	-1.21811	-1.69995	-0.976536	-0.912416	-1.01507	1.8285	1.44453	0.748826	0.855057	1.39805	0.673493	0.885681	1.18773	0.860469	-0.365416	-0.440544	-0.0172804
Leaf_Cluster_C (1155)	Seita.8G121900	-0.591887	0.443461	-0.487896	1.08294	0.807254	1.93843	-1.08291	0.0563826	-0.607728	-0.876901	-1.21992	-1.00101	2.47834	1.23169	0.635593	0.128517	0.0986844	0.0707909	-1.00344	0.257569	-0.838621	0.335466	-1.17735	-0.677461
Leaf_Cluster_C (1155)	Seita.8G140300	-0.0818813	0.280205	-0.435036	0.289525	-0.063379	0.353109	-0.764145	-0.800401	-0.794532	-0.775444	-0.78576	-0.7804	0.849947	1.64898	0.867627	1.90172	2.11293	1.68909	-0.778906	-0.801057	-0.785172	-0.783149	-0.778571	-0.785293
Leaf_Cluster_C (1155)	Seita.8G143400	1.13195	0.138423	0.102087	0.76492	0.427012	1.17587	-1.01167	-0.786275	-1.08305	-1.64654	-1.65438	-1.37716	1.06102	0.997476	2.44019	-0.18546	-0.616001	-0.552528	-0.055844	0.419431	-0.288232	0.564118	-0.0291879	0.063837
Leaf_Cluster_C (1155)	Seita.9G064400	-0.768387	0.161034	-0.739858	0.765699	0.676253	0.464642	-1.12576	-0.392541	-0.652841	-1.04952	-1.05369	-1.1576	1.35675	1.19105	0.243523	1.60273	2.06014	1.71614	-0.526119	-0.311396	-0.771175	-0.40216	-0.910225	-0.37669
Leaf_Cluster_C (1155)	Seita.9G065800	0.00740824	0.220014	-0.690423	0.753484	0.231313	1.12989	-0.536899	0.333023	0.431415	-1.67312	-0.725259	-2.21506	1.80888	0.784153	1.16888	-0.640021	-1.2126	-0.959736	0.438179	0.380508	-0.951975	1.05051	1.13467	-0.267248
Leaf_Cluster_C (1155)	Seita.9G100800	0.142267	-0.230201	-0.602157	0.410151	0.0711062	-0.08352	0.313985	0.794619	0.904828	-1.32483	-1.55428	-1.66608	1.92254	1.75971	0.59592	-1.4263	-1.84809	-0.512068	0.666112	0.331903	0.370029	0.456103	0.271079	0.237189
Leaf_Cluster_C (1155)	Seita.9G114800	-0.662348	1.68265	-0.307517	-0.955533	-1.16422	-1.16425	-0.108706	-0.537809	-0.974881	-0.304108	-1.65174	-0.733481	2.26976	0.924021	0.749095	1.31202	1.07272	1.06016	0.288326	0.360475	0.16513	-0.35365	-0.426482	-0.539626
Leaf_Cluster_C (1155)	Seita.9G122100	-0.318237	-0.789626	1.25955	-0.228676	-1.33952	-0.96263	-1.6964	-0.771222	-1.16223	-0.591617	-1.21934	-0.0349474	0.447085	1.25057	2.40862	0.832856	1.18761	0.484368	-0.0572636	0.511429	-0.485997	0.593374	0.704704	-0.02245
Leaf_Cluster_C (1155)	Seita.9G154500	-0.664669	0.196748	0.166221	-0.957614	-1.24652	-1.09319	1.05371	-0.999976	-0.863468	-0.205654	-1.15978	-0.366231	1.38107	0.902923	2.83687	0.837071	0.932807	0.553816	0.1929	0.00738273	0.428592	-1.02631	-0.693467	-0.21324
Leaf_Cluster_C (1155)	Seita.9G190900	-0.545798	0.467652	-0.738603	-0.307546	-1.23734	0.395746	-0.551814	-0.912514	-1.78565	-0.342538	-1.6753	-1.02011	0.69428	1.17501	1.1507	1.38977	0.897101	0.97129	-0.496097	0.398289	-0.0943365	2.11267	-0.217747	0.272882
Leaf_Cluster_C (1155)	Seita.9G236900	-0.990761	-0.987125	1.3304	-1.01717	0.822608	-0.912423	0.991647	-0.996313	-0.894922	1.19108	-0.99681	-0.944014	0.767907	0.785189	1.01441	0.930278	0.988518	0.996743	0.994694	-1.04012	-0.98703	-1.00815	0.851277	-0.889919
Leaf_Cluster_C (1155)	Seita.9G269000	-0.0161112	0.251241	-0.274048	-0.742675	-0.667809	0.280495	-0.89473	-1.626	-1.26487	-0.488518	-0.782832	0.363942	1.02562	2.16124	0.284309	1.73213	0.81144	1.51454	-1.14042	-0.325223	-1.14758	0.555692	-0.472997	0.863162
Leaf_Cluster_C (1155)	Seita.9G311000	-0.930281	0.133973	-0.949044	-0.415165	-0.14796	-0.672473	-0.971561	-0.821294	-1.1426	-0.5918	-1.05778	-0.74602	2.56545	1.5115	0.414286	1.4371	1.60036	0.613654	-0.106707	-0.647211	-0.176517	0.15136	-0.0933776	1.0421
Leaf_Cluster_C (1155)	Seita.9G328200	0.0357968	0.220692	0.23852	-1.84385	-1.76914	-0.776098	-0.547692	-0.683975	-0.620845	-0.888321	-1.01201	-0.932963	1.11538	2.33868	1.45014	0.723484	1.13698	0.639086	0.667429	0.484202	-0.303526	-0.00871211	0.333365	0.00338527
Leaf_Cluster_C (1155)	Seita.9G418400	0.512013	-0.570089	0.452312	-0.193276	-0.245776	-0.82477	-0.992948	-0.984811	-0.522239	-0.971489	-0.744358	-1.00243	1.58439	2.00505	0.570444	0.75002	1.08823	1.49139	-0.960838	1.23339	1.00216	-0.744337	-1.00361	-0.928431
Leaf_Cluster_C (1155)	Seita.9G426800	-0.244194	-0.450756	-0.438604	-2.05785	-1.81637	-1.32528	0.664859	0.730396	0.194082	-0.967496	-0.0961722	-0.993488	2.04922	1.0472	1.44588	-0.455096	-0.160769	-0.354464	0.464271	0.745433	0.108905	1.24988	0.314328	0.346096
Leaf_Cluster_C (1155)	Seita.9G432000	-0.199413	-0.13031	-0.102131	-0.56805	-0.548459	-0.539368	-0.0849837	-0.683569	-1.22656	-0.796234	-0.927963	-0.881241	2.38402	1.14187	2.37251	1.25035	0.0921953	1.52559	-0.349624	-0.492699	-0.057663	-0.91263	-0.0438863	-0.221748
Leaf_Cluster_C (1155)	Seita.9G443400	0.285387	1.48118	-0.276379	0.066208	-0.680533	-0.803306	-1.24041	-1.06436	-0.665676	-0.960821	-1.23994	-0.85892	2.59536	1.62245	0.37088	0.991241	1.20901	0.654047	-0.353024	-0.279844	-0.0533147	-0.582242	0.263179	-0.480172
Leaf_Cluster_C (1155)	Seita.9G452500	-0.377092	0.370426	0.0833976	0.552858	0.065529	0.891042	-0.50786	0.528601	-0.400638	-0.974512	-1.99549	-0.771127	1.76303	1.97727	0.541227	-1.06005	-1.53212	-0.859177	-0.690463	0.274166	-0.653072	0.896069	1.33943	0.53856
Leaf_Cluster_C (1155)	Seita.9G461100	-0.40343	0.222581	-0.445124	-0.874381	-1.06545	-0.918282	-0.617709	-0.457499	-0.764034	-0.739955	-0.743893	-0.968529	2.31472	1.46305	0.730808	1.3576	0.99051	0.884429	0.761711	0.784563	1.05143	-0.29802	-1.27177	-0.993305
Leaf_Cluster_C (1155)	Seita.9G474800	-0.165437	-0.355526	-1.15031	0.505476	-0.580778	0.0674644	-1.29818	0.494894	-0.0610666	0.607643	0.132122	-0.254906	1.96261	2.57187	-0.301655	-0.881504	-1.33195	-0.802532	0.711686	-0.446402	-1.47096	0.492877	0.294172	1.2604
Leaf_Cluster_C (1155)	Seita.9G508700	-0.323513	0.317167	-1.02097	-0.757637	-0.898518	-0.725064	-0.953123	-0.982884	-0.978647	-0.395476	-0.719366	-0.286039	3.21911	1.73907	1.13194	0.698376	0.636424	0.523289	0.0983632	0.0768386	0.120012	0.221743	-0.555858	-0.185236
Leaf_Cluster_C (1155)	Seita.9G516300	-1.53042	1.25055	0.352964	-0.17302	-1.25097	-0.368634	1.92573	-1.01138	-1.22211	-0.113768	-1.38971	-0.216053	0.971358	0.321433	0.462389	1.94101	1.58705	0.162533	-0.563717	-0.135183	-0.148628	0.305041	-0.984181	-0.172276
Leaf_Cluster_C (1155)	Seita.J002500	-0.00953171	0.504181	0.872009	-1.41878	-1.40073	-1.99099	-0.565715	-0.583635	-0.723877	-0.628031	-1.42219	-0.408107	1.37336	1.18782	2.39538	0.246634	0.0861762	0.23894	0.279052	0.449615	-0.0349195	0.644664	0.518077	0.390596
Leaf_Cluster_C (1155)	Seita.J021900	0.7147	1.19719	0.430793	-1.65033	-1.65033	-1.65033	0.079989	-1.2286	-1.36522	1.01697	-0.36387	-0.725414	0.383543	0.850332	1.06129	0.228333	0.944226	0.664691	-0.977348	-0.946779	0.79043	1.04751	0.495955	0.65226
Leaf_Cluster_C (1155)	Seita.1G072900	0.147862	-0.811797	0.328754	-0.802652	-0.800107	-0.907941	-0.907941	-0.531449	-0.806089	-0.863867	-0.824405	-0.907941	1.17186	1.88564	1.82867	-0.818368	-0.445012	-0.614846	1.4761	1.62265	1.2863	0.320085	0.0484558	-0.0739597
Leaf_Cluster_C (1155)	Seita.1G185300	0.243458	-0.505864	-1.03349	-0.873128	-1.12133	-1.15071	-1.59944	-0.606966	-1.18538	-0.438301	-1.02191	-0.949838	1.53312	1.62987	0.850113	0.0667928	-0.0289668	1.12933	1.14193	0.431344	1.17658	0.680361	1.06369	0.568745
Leaf_Cluster_C (1155)	Seita.1G256400	0.23132	0.0208099	-0.619414	-0.336198	-0.629004	0.567777	-1.11158	-0.843815	-1.68865	-0.534672	-1.21991	-0.784159	1.17759	1.86737	1.87811	0.335682	0.364454	0.859	1.7371	0.411332	0.480326	-0.546896	-0.54793	-1.06864
Leaf_Cluster_C (1155)	Seita.1G268400	0.474617	0.999179	0.0522668	-0.463708	-0.760313	-0.913001	-1.73679	-1.48246	-1.00459	-0.793807	-0.269938	-1.72889	0.666207	0.816089	0.921207	0.0331813	-0.760291	0.131266	1.08895	1.05112	0.96488	0.0240038	1.99126	0.699578
Leaf_Cluster_C (1155)	Seita.1G293100	-1.11245	1.09081	-1.44931	-0.748465	-0.605306	0.503922	0.511194	0.177554	-0.738422	0.248672	0.250546	-0.0131248	2.581	1.88601	0.449782	-0.693533	-0.696166	0.0844448	-1.20109	-1.18605	-0.951582	0.923737	0.131408	0.556424
Leaf_Cluster_C (1155)	Seita.1G336500	0.278314	0.743442	-3.26265	1.25775	1.00816	-2.00667	0.15456	0.670911	0.42048	-0.374729	-0.328527	-0.231032	1.17375	0.834597	0.521747	-0.18181	0.0136078	-0.0883272	-0.584819	-0.278178	-0.417393	0.708063	0.560759	-0.592011
Leaf_Cluster_C (1155)	Seita.1G338300	-0.681	-0.462104	-1.03056	-0.416918	-0.536125	-0.249949	-1.40737	-1.56252	-1.09829	-0.764083	-1.11368	-1.02837	1.926	1.51914	0.632847	0.440705	1.24352	1.43937	0.811987	0.344997	0.817753	0.174	0.597103	0.40357
Leaf_Cluster_C (1155)	Seita.2G066200	1.38947	0.660465	0.965754	0.745532	1.10992	0.99583	-1.33858	-1.66261	-1.4507	-0.938006	-1.45643	-1.07419	0.278946	0.439563	0.512524	1.3066	0.504339	1.48547	-0.191148	-0.15666	-0.241501	-0.407157	-0.855033	-0.622386
Leaf_Cluster_C (1155)	Seita.2G166700	0.395236	-0.0301442	-0.111406	0.193559	0.0835681	-0.232625	-2.00768	-1.66183	-1.47016	-0.80899	-0.399203	0.185264	1.29182	1.25011	0.580422	1.43751	1.64727	1.36323	0.24226	0.0192092	0.561937	-1.00422	-1.05992	-0.465217
Leaf_Cluster_C (1155)	Seita.2G248500	0.103179	0.40158	-0.178056	-0.212457	-0.549536	-0.432938	-1.68594	-1.89111	-1.32529	-0.903679	-1.39445	-0.89353	2.34123	1.19025	0.74287	0.222585	0.490945	0.58382	0.722534	0.431994	-0.0235732	0.658106	0.697746	0.903711
Leaf_Cluster_C (1155)	Seita.2G255500	-0.175848	-0.245527	-0.32768	0.101343	-0.864848	-0.627941	-1.40203	-1.70143	-1.10435	-0.678711	-1.61752	-1.16122	1.67186	0.954593	1.30525	1.49553	0.752067	0.126446	0.715607	0.549384	0.481961	0.624245	1.21325	-0.0844252
Leaf_Cluster_C (1155)	Seita.2G323200	-0.163661	0.305438	-1.45671	0.805301	0.878305	0.598624	-1.39605	-1.32795	-0.993883	-0.853756	-1.93438	-1.45458	1.42135	1.20171	-0.674566	0.885599	0.620642	0.755018	0.393725	1.16245	0.600448	0.0550967	0.303794	0.268028
Leaf_Cluster_C (1155)	Seita.2G324800	-0.967891	-0.949043	0.49875	-0.946246	-0.967891	-0.946221	-0.803345	-0.849569	-0.853192	0.404619	0.0753793	0.898488	-0.933833	2.02988	1.84394	-0.931372	-0.949231	1.64245	0.180888	0.0893313	0.0163057	0.6834	1.21627	0.518134
Leaf_Cluster_C (1155)	Seita.3G045500	-0.513551	-0.277441	-0.562425	0.388102	-0.469585	-1.01413	-1.61128	-1.42413	-1.67405	-0.758713	-0.960629	0.147159	2.10477	1.59675	0.773018	0.172655	-0.286802	0.0482262	0.236733	1.23891	0.509197	0.150607	1.23698	0.949627
Leaf_Cluster_C (1155)	Seita.4G062200	-0.310065	0.401744	-1.28376	0.0286149	-0.138509	-0.299872	-1.31035	-1.91399	-0.881973	-0.122315	-1.24029	-0.381889	1.9371	1.76866	-0.950907	0.881147	0.75761	1.10749	1.40466	0.558528	0.532905	-0.243627	-0.364727	0.0638206
Leaf_Cluster_C (1155)	Seita.4G174400	-0.668855	0.205038	-0.229182	0.544828	-0.164874	0.78537	-0.238244	-0.192187	-0.280765	0.0635582	-1.34557	-0.914187	1.46045	0.685473	1.659	-0.577079	-0.452049	-0.619656	-1.22885	-1.51836	-1.38471	1.78806	1.15582	1.46696
Leaf_Cluster_C (1155)	Seita.4G275700	1.36787	0.83282	-0.30162	-0.866565	-1.11538	-0.603388	-0.806328	-0.624267	-1.23323	-0.0483961	-1.25169	-0.32362	-0.235443	0.394124	2.3884	-0.887374	-0.126836	-0.351967	0.485399	1.04546	0.406561	2.28143	-0.456479	0.0305145
Leaf_Cluster_C (1155)	Seita.4G277600	0.520204	0.416911	-0.625789	-0.601092	-0.242703	-0.198075	-0.866935	-0.643126	-0.572132	-0.765322	-1.2986	-0.711487	2.88083	2.02995	0.211058	-0.0953651	0.448749	0.315163	0.476303	0.912206	1.09303	-0.930641	-0.838105	-0.915029
Leaf_Cluster_C (1155)	Seita.5G014400	0.360336	-0.142916	0.0550553	0.25902	-0.128464	-0.0146514	0.18547	-0.804688	0.266395	-0.205451	-1.26617	-1.02293	1.06423	0.179905	1.64407	0.414042	0.796476	0.0981996	-2.46181	-1.4665	-1.37764	1.19711	0.80988	1.56104
Leaf_Cluster_C (1155)	Seita.5G015400	-0.680625	-0.318683	-0.594934	-0.293173	-0.836413	-1.05397	-1.56344	-0.685305	-1.62892	-0.982882	-0.626223	-0.257839	1.93953	2.08281	0.338915	0.703041	-0.0284174	0.308912	0.772861	-0.0698037	1.56148	0.347403	0.802656	0.763003
Leaf_Cluster_C (1155)	Seita.5G045900	-0.0376984	0.151285	0.58131	-1.33781	-1.33781	-1.33781	-0.629182	-0.73451	0.168531	-0.361669	-0.11584	0.157811	0.801656	0.758891	0.809288	-1.33781	-1.33781	-1.33781	0.783996	1.69783	0.587172	0.309471	1.8273	1.27124
Leaf_Cluster_C (1155)	Seita.5G068800	0.981552	0.0970785	-1.16941	0.041736	0.836099	-0.256972	0.162199	-0.132628	-0.0829464	-1.44872	-1.36486	-1.40528	1.30512	1.74953	1.50539	1.31786	1.1317	0.623185	-0.595238	-0.37149	-0.763462	-1.25146	-0.909916	0.00092093
Leaf_Cluster_C (1155)	Seita.5G296100	-0.96354	-0.203267	1.2417	-0.306718	-0.263285	-0.619593	-0.87586	-0.888481	-0.973265	1.08764	-0.0420405	-0.968926	2.52311	1.93417	0.184334	-0.601265	1.04137	-0.384224	-0.486753	-0.52517	-0.417855	1.52613	-0.65798	-0.360245
Leaf_Cluster_C (1155)	Seita.5G307800	0.0530032	-0.486323	-0.694806	-0.167658	0.946154	0.61277	-1.61199	-1.13892	-1.34897	-1.3062	-1.08132	-0.995511	1.4751	1.4114	0.46426	1.05266	1.7012	0.761529	-0.871624	-0.326746	-0.0524158	0.151069	1.21836	0.234955
Leaf_Cluster_C (1155)	Seita.5G432500	-0.773629	0.285826	-0.422783	-0.904168	-1.08197	0.802921	-0.337012	-0.730571	-1.48596	-1.06933	-1.23633	-1.41764	1.43224	0.892035	1.68933	1.94082	0.505162	0.369382	0.41421	0.825899	0.501491	0.746992	-0.460663	-0.486246
Leaf_Cluster_C (1155)	Seita.6G082400	0.136154	-0.118129	1.13347	0.666703	-0.0102992	0.0598464	-1.99534	-1.94456	-1.84874	0.0531745	-0.718189	-0.263999	0.161702	0.603078	1.42765	0.573363	0.534015	0.835148	-1.00111	-0.550297	-0.915612	0.71656	1.3559	1.10951
Leaf_Cluster_C (1155)	Seita.6G119400	-0.50269	-1.26442	-1.74783	0.907451	0.7379	0.655503	0.329055	0.164162	-0.170534	0.473603	-0.00870002	0.0959282	1.32064	1.7026	-0.733969	0.863634	0.992108	1.0006	-0.609615	-1.96594	-1.91587	0.0471375	-0.125877	-0.24488
Leaf_Cluster_C (1155)	Seita.6G222800	0.470342	1.36623	-0.142177	-0.15037	0.161002	-0.396948	-1.76866	-1.29265	-1.57555	-0.385588	-1.7835	-1.03887	1.02471	1.86961	0.0979435	0.209708	0.375416	1.08948	0.743109	0.763681	1.2737	-0.407475	-0.347172	-0.155979
Leaf_Cluster_C (1155)	Seita.6G224400	0.0448613	0.57195	-1.33766	-0.529046	-0.217551	-0.343653	-1.19608	-0.994345	-1.85416	-1.06699	-1.57164	-1.08112	1.51363	1.73443	0.811405	0.732396	0.583676	0.532565	0.80657	1.07059	0.538218	0.632173	0.36039	0.259402
Leaf_Cluster_C (1155)	Seita.7G053700	0.09356	0.358415	0.00406264	0.832562	0.0339359	0.286533	-0.182455	0.234619	-0.0677166	-1.14645	-1.10658	-1.79384	2.34849	2.10668	1.09971	-0.272269	0.553388	0.271937	-1.65387	-0.810875	-0.992238	0.305594	-0.356822	-0.14637
Leaf_Cluster_C (1155)	Seita.7G058100	0.663991	0.71088	1.19641	1.15725	1.09309	0.91379	-1.79655	-1.16646	-1.76908	-1.12685	-1.79655	0.116953	0.182052	0.777067	1.4101	0.603925	0.708033	0.485924	-0.694197	-0.65915	-0.223078	-0.49501	-0.292712	0.000176236
Leaf_Cluster_C (1155)	Seita.7G162700	-0.563443	-0.444279	-1.31814	0.026937	0.154025	-0.455346	-0.503358	-0.750527	-1.60843	-0.935768	-1.5911	-0.970722	2.46995	1.56707	0.313302	1.04135	0.618509	0.954601	0.302143	0.733918	0.708374	0.331908	-0.532776	0.451803
Leaf_Cluster_C (1155)	Seita.7G256100	-0.0858634	-1.7323	-0.0461011	-0.381183	-1.56824	-0.264252	-1.31588	-0.511258	-1.40998	-0.47502	-0.783624	-0.88911	1.63931	1.35204	1.73903	-0.197533	0.112825	0.361855	1.17252	1.00761	0.239723	0.366918	0.895612	0.772892
Leaf_Cluster_C (1155)	Seita.8G051800	0.0391021	-0.860223	-0.63725	-0.666	-0.429707	-0.629307	-0.147258	-0.736696	-0.490827	-0.86673	-1.03365	-0.983864	1.73616	0.573735	1.80953	-0.441488	-0.895446	-0.232768	1.69553	1.3481	2.14187	0.3152	-0.339218	-0.268794
Leaf_Cluster_C (1155)	Seita.8G083100	0.191619	-0.522909	-0.112754	-0.470878	0.199342	-0.200328	-1.76285	-1.58495	-2.00395	-0.579422	-1.13037	-0.0174096	1.27756	0.566111	1.59378	1.24592	0.847655	1.18288	-0.125379	0.0248139	-0.851934	1.34335	0.546567	0.343531
Leaf_Cluster_C (1155)	Seita.8G151700	-0.408915	-0.543791	-0.0955017	0.648461	1.23286	0.683868	0.430865	0.0897927	0.347674	-1.63638	-1.53091	-1.66966	0.824163	0.956474	0.358685	1.05518	1.60194	1.42594	-0.32657	0.105331	0.078974	-1.38605	-1.09841	-1.14403
Leaf_Cluster_C (1155)	Seita.9G003800	1.2959	-0.0798433	0.369949	-0.855322	-0.858336	0.197342	-0.151948	-0.031114	-0.673238	-0.373479	-1.32764	-0.821523	1.31869	1.10403	1.6587	1.22343	0.980722	0.151531	-1.72339	-1.63468	-1.28464	0.211599	0.306204	0.997051
Leaf_Cluster_C (1155)	Seita.9G046900	-0.406168	0.68468	0.652825	-0.825952	-0.73734	-0.766272	-0.865269	-0.684651	-0.944648	-0.897174	-0.910613	-0.917593	0.958051	1.92549	2.1468	-0.372169	-0.678137	0.40104	1.6648	1.35123	0.575327	-0.426913	-0.40382	-0.523521
Leaf_Cluster_C (1155)	Seita.9G077300	-0.0178485	0.655396	-0.217003	-0.214575	-0.849853	0.212584	-1.39611	-1.23616	-1.62216	-1.36842	-0.921875	-1.10997	2.41197	1.29225	1.33455	0.641534	0.495376	0.637715	0.437638	0.65631	0.146874	0.409396	0.275734	-0.653346
Leaf_Cluster_C (1155)	Seita.9G317100	-1.10959	-1.39934	-0.700613	0.31463	0.452399	0.619463	1.05099	0.460442	0.359958	-0.950388	-1.64261	-1.70872	0.848893	0.549537	1.2921	0.189762	0.399769	-0.00904164	-1.06075	-0.586797	-1.13288	1.34421	1.59168	0.826905
Leaf_Cluster_C (1155)	Seita.9G447400	-0.59973	0.0237509	-0.255038	-0.404242	-0.622727	1.03963	-0.705609	-0.89656	-0.842454	-0.235135	-0.853669	-0.552255	-0.0581382	-0.0295885	1.55817	0.190579	0.304328	-0.47563	-0.279299	-0.252646	-0.190998	3.83954	-0.0635556	0.361277
Leaf_Cluster_C (1155)	Seita.9G478800	0.528922	0.576157	-1.33468	-1.45202	-0.321603	-0.355614	0.338992	0.433204	0.251243	-0.98138	0.383415	0.23676	2.05022	2.24069	0.116887	-1.28796	-1.22135	-0.963844	-1.01651	-0.0781472	-0.277607	0.648339	0.118929	1.36695
Leaf_Cluster_C (1155)	Seita.9G500900	-0.433083	0.410207	-0.885653	-0.461258	-0.587795	-0.217191	-1.08839	-0.750639	-1.25571	0.265113	-0.631485	0.261882	2.62411	2.57784	0.717314	-1.01008	-0.837939	-0.711436	0.0890593	0.201811	0.0320782	0.838242	0.400254	0.452743
Leaf_Cluster_C (1155)	Seita.9G524200	0.103901	0.611147	0.152816	-1.29023	-0.902646	-1.18417	-0.847642	-0.510467	-0.866521	-0.920239	-0.804104	0.15643	1.78862	1.93882	0.696224	-0.677841	-0.47715	0.538106	1.21347	0.910143	1.73652	0.39873	-0.959828	-0.804086
Leaf_Cluster_C (1155)	Seita.9G533800	0.454784	0.916962	-0.322697	-0.483774	0.168989	-0.0669021	-0.993593	-1.02681	-1.54751	-0.85166	-0.789434	-0.949159	2.64564	1.87263	0.478091	0.136686	0.472129	0.942917	0.564776	0.527698	0.38395	-0.549811	-1.07828	-0.905607
Leaf_Cluster_C (1155)	Seita.J029100	-0.517824	0.0766976	-1.20282	0.494841	0.983185	1.5806	0.055636	0.0401968	-0.672648	-0.617687	-0.652659	-1.02769	1.67671	1.19234	-0.0526286	1.4341	1.45356	1.19139	-0.872049	-0.750231	-1.3012	-0.390581	-1.11081	-1.01043
Leaf_Cluster_B (1531)	Seita.1G005600	0.244225	-1.01327	-1.09018	-1.2607	-1.19751	-0.935396	-0.132611	0.20205	-0.996967	-0.706201	-1.49478	-1.2933	0.630403	0.92953	0.916416	0.970903	0.271372	-0.71287	1.28738	1.36302	0.871504	1.11761	1.29757	0.731814
Leaf_Cluster_B (1531)	Seita.1G012200	-0.617873	-0.892019	-0.457059	-0.496159	-0.602095	-0.549618	-0.819319	-1.19163	-0.853578	-1.28945	-1.44298	-1.37973	0.454828	0.478938	0.710078	1.56007	1.52749	1.53146	1.23023	0.968352	1.15827	0.233979	0.544843	0.192976
Leaf_Cluster_B (1531)	Seita.1G019500	-0.937955	-1.05063	-0.884912	-1.01047	-0.904547	-1.19228	-0.973305	-1.11406	-0.794903	-0.745998	-1.10032	-0.672844	1.63771	1.29043	0.853266	1.0475	1.20568	0.924451	0.433423	0.655076	0.65222	0.840774	0.865169	0.976534
Leaf_Cluster_B (1531)	Seita.1G024000	-1.08353	-0.783175	-2.32317	-0.205862	-0.160561	-0.698954	-0.970792	-0.0568992	-0.558727	-0.846419	-0.912142	-0.917682	1.39909	1.52535	0.259387	0.195222	0.519078	0.61354	0.181849	0.736964	0.0379509	1.23868	1.91172	0.899077
Leaf_Cluster_B (1531)	Seita.1G024200	-0.940746	-0.794356	-0.746161	-0.792422	-0.182395	-0.741697	-1.01564	-1.02562	-0.459974	-0.675617	-1.43708	-0.805384	0.39755	1.44003	1.81798	0.671788	0.352123	0.683678	-0.049737	0.00845877	0.155949	0.265085	1.7509	2.12329
Leaf_Cluster_B (1531)	Seita.1G025800	-0.896317	-0.992193	-0.903232	-0.934879	-0.861345	-0.795091	-0.974288	-0.911892	-1.00989	-1.05394	-1.01771	-1.0323	1.03747	1.07899	1.48259	1.50078	0.705109	1.05133	1.1161	0.88566	0.697156	0.834047	0.758065	0.235787
Leaf_Cluster_B (1531)	Seita.1G029900	-1.06869	-0.862225	-1.06869	-0.464515	0.596503	2.01712	-1.06869	-0.942545	-1.06869	0.571158	-1.06869	0.0910408	0.629616	0.0187757	0.979517	1.71238	0.985842	0.286838	-1.06869	1.10577	-1.06869	-0.676385	0.297407	1.13457
Leaf_Cluster_B (1531)	Seita.1G035400	-0.694137	-1.50743	-1.34518	-0.110172	-0.0714015	-0.567765	-0.699592	-1.21085	-1.70102	-0.593954	-1.22635	-0.405855	0.927408	0.425481	1.54449	1.57889	0.961868	1.00092	0.747532	0.686054	0.137195	1.44485	0.257985	0.421032
Leaf_Cluster_B (1531)	Seita.1G044800	-0.788126	-0.552728	-0.0623376	-1.17514	-0.967072	-1.07488	-1.09224	-0.99444	-0.689741	-1.07872	-1.23503	-1.24158	1.05376	1.58433	1.21643	0.967965	0.111866	0.544439	1.1619	1.11947	1.14993	0.85237	0.639869	0.549716
Leaf_Cluster_B (1531)	Seita.1G063500	-0.825723	-0.966067	-0.477352	-0.768363	-0.929578	-0.736092	-0.891741	-1.09318	-1.04257	-1.17204	-1.25326	-0.97706	1.37564	1.25914	1.68694	1.08776	0.96364	0.956989	0.359449	0.477405	0.310124	1.0164	0.857343	0.782199
Leaf_Cluster_B (1531)	Seita.1G063600	-0.93798	-0.491024	-0.839447	-0.479557	-0.473313	-0.636832	-1.16301	-1.05971	-1.47984	-0.759161	-1.14228	-0.913952	1.27903	1.35991	1.41812	1.37619	1.19608	1.36971	0.893015	0.984941	0.0509061	0.641989	0.035182	-0.228974
Leaf_Cluster_B (1531)	Seita.1G065800	-0.553328	-0.715074	-0.555126	-1.30086	-1.25428	-0.575013	-0.544758	-0.575715	-1.35709	-0.926178	-1.24853	-1.19102	0.956156	1.52973	1.09998	0.181249	0.179827	0.903486	1.37957	1.20605	0.763095	1.40559	0.574687	0.617559
Leaf_Cluster_B (1531)	Seita.1G069500	-1.10097	-1.39819	-1.66304	-0.488685	-0.320566	-0.471261	-0.848708	-1.1145	-0.735373	-0.896116	-0.978792	-0.74956	1.59761	1.45644	0.856344	1.21154	1.10158	1.1877	0.269098	0.455238	0.496006	0.415537	0.900335	0.818354
Leaf_Cluster_B (1531)	Seita.1G076900	-0.91255	-0.748373	-0.800305	-0.925483	-0.927593	-0.712949	-0.876105	-1.00612	-1.08922	-1.13906	-1.18032	-1.1544	0.792469	0.824754	1.53342	0.978581	0.92046	0.94918	0.756558	0.850875	0.457209	1.1774	1.06627	1.1653
Leaf_Cluster_B (1531)	Seita.1G078200	-1.05819	0.0531751	-0.45664	-1.23987	-1.42208	-1.19113	-0.109186	-1.09929	-1.61659	-0.812769	-0.976788	-0.514068	0.396919	0.535174	0.867731	1.56561	1.63042	1.21992	0.492821	1.0695	0.736268	0.578521	0.612691	0.737849
Leaf_Cluster_B (1531)	Seita.1G080900	-0.890515	-0.905513	-1.19516	-1.03075	-1.08672	-0.436346	-0.655679	-0.755948	-0.994114	-1.01156	-1.1904	-1.02412	1.04616	1.34203	1.03864	0.321732	0.322112	0.900532	1.15878	1.02189	0.488889	1.5278	1.20008	0.808193
Leaf_Cluster_B (1531)	Seita.1G081100	-0.658777	-0.343368	-0.633911	-0.891398	-1.14775	-0.937126	-1.09839	-1.17567	-1.14798	-0.623271	-1.00248	-1.03903	0.829398	1.04869	1.25952	1.85437	1.03008	1.71437	0.818032	0.54213	0.0819583	0.754033	0.508894	0.257669
Leaf_Cluster_B (1531)	Seita.1G084800	-0.834323	-0.544571	-0.930122	-0.316578	-0.0769553	0.0858744	-0.824469	-0.845743	-0.730414	-0.924174	-1.0534	-1.20517	1.60461	0.911211	0.19121	1.70499	1.72107	1.9436	0.643739	0.857524	0.453176	-0.592806	-0.371685	-0.866597
Leaf_Cluster_B (1531)	Seita.1G095600	-0.948963	-0.668687	-0.984104	-0.803117	-0.609448	-0.823341	-0.651194	-0.890348	-1.14486	-0.737198	-1.26978	-0.772524	1.44152	0.658287	1.7141	1.43259	0.638333	0.663105	1.51682	1.00236	-0.405603	1.36045	0.145804	0.135792
Leaf_Cluster_B (1531)	Seita.1G118400	-0.973522	-0.797534	-0.832208	-0.141692	-0.192434	0.201859	-1.08026	-0.954715	-0.729338	-1.735	-1.5484	-1.69635	1.10952	1.17689	0.893041	0.939898	1.02847	1.20058	0.661934	0.757623	0.651004	0.711436	0.8765	0.472698
Leaf_Cluster_B (1531)	Seita.1G123000	-0.568792	-0.353346	-0.92391	-0.997378	-1.08792	-1.36069	-1.09185	-1.09314	-1.10464	-0.445368	-0.845694	-0.464053	0.956993	0.997584	1.0673	1.32832	1.37939	1.40502	1.16505	1.12323	1.25216	-0.196218	-0.121598	-0.0204563
Leaf_Cluster_B (1531)	Seita.1G123800	-1.57116	-1.25173	-1.89803	-0.257678	-0.349932	-0.616151	-0.7397	-0.830738	-0.677322	-0.534905	-0.562464	-0.774244	1.08934	1.20465	0.921213	1.39955	1.95301	1.31138	0.378224	0.244678	0.457275	0.172591	0.324352	0.607793
Leaf_Cluster_B (1531)	Seita.1G127100	-0.702853	-1.09554	-0.425397	-1.1527	-0.456569	-1.1127	-0.848709	-1.10614	-0.396765	-1.4469	-1.33027	-0.891271	0.447015	0.944695	1.56016	0.766697	0.451068	0.800841	0.459786	1.23343	0.632718	1.24063	1.28521	1.14357
Leaf_Cluster_B (1531)	Seita.1G127200	-1.69842	-2.33559	-2.03999	-0.88283	-0.788515	-0.40215	0.452898	-0.392094	-0.38308	0.484362	0.709474	0.618919	-0.722935	0.0112098	0.0955549	0.924645	1.39153	1.14264	0.763212	0.841685	0.666803	0.197265	0.650537	0.694866
Leaf_Cluster_B (1531)	Seita.1G146900	-1.30101	-1.06616	-1.27269	-0.967856	-1.13453	-0.264669	-0.290207	0.063169	-0.687156	-1.01526	-1.52394	-1.02442	1.63118	0.676974	0.392896	0.691118	0.908189	1.68893	0.188113	0.950025	0.886694	0.971519	0.941948	0.557137
Leaf_Cluster_B (1531)	Seita.1G154200	-1.38863	-1.64564	-1.61598	-0.0547564	0.00753505	-0.255358	-0.113253	-1.0082	-1.60799	-0.349422	-1.03962	-0.46784	1.13108	0.148151	1.69185	1.09742	0.908086	1.05493	0.417711	0.776421	-0.0654959	1.43935	0.316569	0.623088
Leaf_Cluster_B (1531)	Seita.1G155200	-0.915392	-0.58614	-2.31073	-0.541667	-0.617269	-0.707829	-0.512105	-0.593141	-0.699958	-0.614222	-0.849691	-0.773472	1.92429	1.56075	0.23394	1.48166	1.19859	1.01908	0.766032	0.0166213	0.79614	0.311864	-0.136286	0.548939
Leaf_Cluster_B (1531)	Seita.1G170500	-0.871645	-1.24879	-0.96646	-0.735046	-0.605402	-0.657419	-0.99635	-0.876837	-0.92996	-0.326852	-0.803875	-0.408543	0.666571	0.257373	1.50704	0.689616	0.0982238	0.408575	-0.0265295	0.251953	0.790147	0.224782	2.66327	1.89616
Leaf_Cluster_B (1531)	Seita.1G186400	-0.937225	-1.00626	-0.949208	-0.959894	-0.947745	-0.938548	-0.922512	-0.984335	-0.991727	-0.999942	-1.00626	-1.00626	0.735583	0.761244	1.05053	1.17584	1.11373	1.18618	1.14805	1.08691	0.944126	0.931509	0.85026	0.665949
Leaf_Cluster_B (1531)	Seita.1G186500	-1.02135	0.535096	-1.39577	-1.47988	-1.3311	-1.38286	-0.134622	-0.696761	-0.158373	-0.441287	-0.994498	-1.40542	1.13162	1.50631	1.13865	1.18233	0.976738	1.21519	0.392531	0.559805	0.564381	0.767035	0.240076	0.232149
Leaf_Cluster_B (1531)	Seita.1G191300	-0.627507	-2.27452	-1.00743	-0.281433	0.0333992	0.142541	-0.861725	-1.09495	-0.350952	-0.632106	-1.29314	-1.45547	0.944931	1.47829	0.898374	0.652875	0.128287	1.00678	0.461517	0.708143	0.31539	0.817939	1.69948	0.591285
Leaf_Cluster_B (1531)	Seita.1G193500	-1.06226	-1.56223	-1.01312	-0.199554	0.00590972	-0.29448	-0.762156	-1.09354	-1.16818	-0.935098	-0.687067	-0.367446	-0.600088	-0.247295	0.259398	1.66989	0.871505	2.26862	0.449772	0.774283	1.26896	1.05288	0.760143	0.611156
Leaf_Cluster_B (1531)	Seita.1G205400	-1.43275	-1.74326	-1.72511	-0.133521	0.197143	-0.602142	-0.459228	-0.288998	-0.382473	-0.705693	-1.4584	-1.15584	0.4372	0.530708	-0.104764	1.19924	0.998984	1.21692	0.403609	0.784942	1.04785	0.97526	1.22881	1.17152
Leaf_Cluster_B (1531)	Seita.1G209000	-0.687712	-0.762926	-1.35873	-0.554266	-0.906105	0.418914	-0.0555096	0.206525	0.117945	-1.52908	-1.08853	-1.77169	0.758226	0.403412	0.827446	-0.227622	-0.183427	-0.0326202	0.615824	0.669037	-0.202854	1.99492	1.9087	1.44011
Leaf_Cluster_B (1531)	Seita.1G210300	-0.947412	-0.654502	-0.28892	-0.663217	-0.869071	-0.758991	-0.925446	-1.17478	-0.987292	-1.05636	-1.38943	-1.26113	1.41294	1.32144	1.61681	1.0706	1.07915	1.04471	0.744003	0.71148	0.63271	0.718697	0.455248	0.168763
Leaf_Cluster_B (1531)	Seita.1G212200	-0.799308	-1.84341	-1.78475	0.453191	0.437688	0.315416	-0.911563	-1.06812	-1.92997	-0.317068	-1.22435	-0.0961417	0.393289	0.0873911	0.394123	0.789397	0.588825	0.667045	0.462783	1.05131	1.01494	1.47409	0.826609	1.0186
Leaf_Cluster_B (1531)	Seita.1G217500	-1.21819	-1.34426	-0.799582	0.0504463	-0.115673	0.29742	-0.948791	-1.37922	-0.907191	-0.859006	-1.61502	-1.16235	0.77533	0.883725	1.53267	1.13112	1.04145	1.16659	0.700467	0.252887	-0.195503	1.13558	0.962389	0.614711
Leaf_Cluster_B (1531)	Seita.1G218500	-0.523185	-0.783901	-1.02817	-0.606067	-0.495914	-1.03866	-0.377733	-0.633529	-0.856758	-1.02734	-1.49066	-0.927905	0.601459	0.885675	1.72922	0.873712	0.768353	1.06095	-0.197263	-0.108949	-0.302859	1.98434	0.985673	1.5095
Leaf_Cluster_B (1531)	Seita.1G220400	-0.996737	-0.919958	-1.18447	-0.258971	-0.309519	-0.404059	-0.969925	-1.01347	-1.07382	-1.00612	-0.672891	-0.816928	0.972511	0.817995	0.263687	1.79376	2.08864	2.06496	0.0883313	0.0750352	0.125672	0.453438	0.330345	0.552477
Leaf_Cluster_B (1531)	Seita.1G227600	-1.11584	-2.12264	-1.91972	-0.188637	0.351981	0.159675	-0.351435	-0.935863	-0.254132	-1.07275	-0.840246	-1.06753	1.47878	1.05747	0.744948	0.47314	0.540237	0.728477	0.0438546	0.213346	0.786648	0.824631	1.11799	1.34762
Leaf_Cluster_B (1531)	Seita.1G231000	-0.800433	-0.568835	-1.38879	-0.432272	-0.804572	-0.278665	-1.3933	-0.873422	-0.90761	-1.16853	-1.15212	-0.71744	1.54167	1.24735	0.551569	1.05385	1.22257	0.929624	-0.0412586	0.327428	-0.0157627	1.20215	1.51313	0.953665
Leaf_Cluster_B (1531)	Seita.1G239300	-1.188	-0.89697	-0.914776	0.0575919	-0.420237	0.552844	-1.20142	-1.08285	-0.752511	-1.14336	-1.10579	-1.42239	0.561169	0.235096	1.303	1.3412	0.124372	0.378325	0.261737	0.580766	0.206175	2.04044	1.24128	1.24432
Leaf_Cluster_B (1531)	Seita.1G239600	-0.675627	-0.806985	-0.891835	-0.955075	-0.981494	-0.918036	-0.682062	-0.515722	-1.05024	-1.08879	-1.2654	-0.747049	1.13044	0.81953	0.817238	1.34187	1.59933	1.5267	1.07182	1.2509	1.03588	-0.0153576	0.230448	-0.230465
Leaf_Cluster_B (1531)	Seita.1G241800	-0.865695	-0.865695	-0.865695	-0.830321	-0.850395	-0.762688	-0.764724	-0.865695	-0.814646	-0.657197	-0.782983	-0.562142	1.66501	0.571445	1.60757	2.0183	0.746479	1.25129	0.911428	-0.0723849	-0.613132	1.44096	0.319573	-0.358656
Leaf_Cluster_B (1531)	Seita.1G253700	-0.96296	-0.88469	-0.876775	-0.787147	-0.786765	-0.863472	-1.03365	-1.02645	-1.03541	-1.07688	-1.08372	-1.09193	1.12824	0.549122	1.00731	1.0216	1.1967	1.28747	1.17079	1.07038	0.980611	0.900294	0.809284	0.38805
Leaf_Cluster_B (1531)	Seita.1G256200	-0.741492	-0.528974	-0.984465	-1.54861	-1.33331	-1.26805	-0.311504	-0.800609	-1.06526	-0.498439	-0.810925	-0.804414	1.35889	1.45536	0.777574	0.149927	0.427766	0.743319	0.87347	0.738195	0.29661	1.70004	1.16821	1.00669
Leaf_Cluster_B (1531)	Seita.1G264800	-0.860648	-1.47609	-1.37602	-0.230679	-0.0768961	-0.668026	-0.914123	-1.02607	-0.824374	-1.17235	-1.32998	-0.58651	0.328881	0.761927	0.492908	1.31285	0.459262	1.02219	0.652247	0.186488	0.991783	1.53221	1.42245	1.37857
Leaf_Cluster_B (1531)	Seita.1G267200	-0.645772	-0.851893	-1.12326	-1.12966	-0.882426	-0.660274	-1.05772	-1.07856	-1.22866	-0.808579	-1.03061	-0.717748	0.988144	0.801562	1.2789	1.53189	1.28859	1.36594	0.862527	0.611641	0.221434	0.947564	0.764366	0.552598
Leaf_Cluster_B (1531)	Seita.1G272900	-0.935171	-1.01284	-0.809147	-1.00926	-0.937172	-0.852206	-0.962588	-0.994685	-1.01652	-0.960596	-0.882564	-0.982499	0.770771	1.26753	1.24069	1.56352	0.89033	1.17483	0.204916	0.701413	0.912797	0.893469	1.1653	0.569694
Leaf_Cluster_B (1531)	Seita.1G275500	-1.16288	-0.99616	-1.20568	-0.334578	-0.843642	-0.539935	-0.771449	-0.808027	-0.821327	-0.875933	-1.08935	-0.930467	0.726872	0.642765	1.3597	0.936658	0.929818	0.81684	0.0650918	0.133322	-0.144713	1.8257	1.58044	1.50694
Leaf_Cluster_B (1531)	Seita.1G276200	-1.22492	-0.60919	-1.2323	-0.916596	-0.618138	-0.528205	-0.805483	-0.969489	-1.08641	-0.95232	-1.02728	-0.814103	0.643843	0.716616	0.903202	1.8119	1.39403	1.76254	0.813925	0.873381	0.457675	0.946308	0.25782	0.203207
Leaf_Cluster_B (1531)	Seita.1G276500	-1.02321	-0.738743	-0.98184	-1.15809	-0.57456	-0.461838	-0.627257	-0.80795	-1.02089	-0.617108	-0.466095	-1.15809	1.37044	2.07845	0.481417	0.512916	-0.0611855	0.86565	1.35528	2.04418	0.350196	0.942646	-0.229731	-0.0745748
Leaf_Cluster_B (1531)	Seita.1G279800	-0.961437	-0.808648	-1.12914	0.0231824	-0.182519	0.0349923	-1.20478	-0.994997	-0.951384	-1.31067	-1.60048	-1.52949	0.319078	1.08219	1.0673	0.617816	1.1955	1.25107	0.773654	0.818891	0.856925	0.97778	0.947756	0.707403
Leaf_Cluster_B (1531)	Seita.1G289600	-0.367913	-0.809644	-1.07819	0.0529358	-0.427392	0.418456	-1.55086	-0.956427	-0.944609	-1.46831	-1.23272	-1.40514	1.10765	-0.0056227	0.577442	0.838629	0.732965	1.29138	0.557097	0.691684	-0.0466752	1.35824	1.61904	1.04798
Leaf_Cluster_B (1531)	Seita.1G294300	-1.22815	-1.03129	-0.884987	-1.38164	-1.15289	-1.0999	-0.649835	-0.683822	-1.3594	-0.616925	-0.295827	-0.49042	1.28625	1.37265	1.68667	0.875157	0.377647	0.749018	1.21271	0.876803	0.344483	0.907035	0.514029	0.672645
Leaf_Cluster_B (1531)	Seita.1G316900	-1.1844	-1.18862	-1.03847	-1.34251	-1.17854	-1.11286	-0.115122	0.175938	0.506165	-0.631602	-0.537084	-0.588032	0.0921259	0.215741	-0.0633005	-0.224285	-0.491989	-0.0846484	1.53276	1.65605	1.58351	1.34925	1.33511	1.33482
Leaf_Cluster_B (1531)	Seita.1G322700	-0.777561	-0.544497	-0.955902	-0.991311	-0.953951	-0.855421	-0.965062	-0.867064	-0.938661	-1.1586	-1.13367	-1.11888	1.03526	0.996159	1.07012	1.52367	1.41485	1.45255	0.804032	0.769315	0.588661	0.664774	0.519719	0.421466
Leaf_Cluster_B (1531)	Seita.1G330800	-0.882261	-0.926288	-0.911156	-0.876565	-0.926288	-0.873259	-0.621071	-0.822831	-0.875008	-0.800453	-0.926288	-0.876534	0.771019	0.312567	1.54116	2.17157	1.56787	1.30813	0.479782	0.288642	0.110444	1.11856	-0.069257	0.717519
Leaf_Cluster_B (1531)	Seita.1G342400	-0.516494	-0.209068	-0.744064	-0.38505	-0.392296	-0.841121	-0.98388	-1.03399	-0.803393	-1.05626	-1.18332	-1.08259	0.649156	0.676399	0.235453	1.8415	1.74563	1.9227	1.09475	0.950448	0.973981	0.0907471	-0.177096	-0.772142
Leaf_Cluster_B (1531)	Seita.1G357900	-0.702142	-0.583226	-1.34472	-0.0985696	-0.2682	0.151099	-1.33522	-0.981932	-0.999754	-1.53007	-1.6689	-0.945113	1.3003	1.41381	0.834315	1.08655	1.33147	1.14668	0.378455	0.433355	0.408358	0.514612	0.7897	0.669152
Leaf_Cluster_B (1531)	Seita.1G362600	-0.739571	-1.23452	-0.755436	-0.112523	-0.484981	-0.159434	-1.26401	-1.02813	-1.01428	-1.17862	-1.96698	-0.772895	0.546362	1.2265	0.859565	0.814571	1.47394	0.947962	0.674331	0.878906	1.0251	0.325598	1.02665	0.911907
Leaf_Cluster_B (1531)	Seita.1G364200	-1.02837	-0.211652	-1.37126	-0.301444	-0.451115	-0.978026	-0.921663	-0.93324	-1.36437	-0.900996	-0.767627	-1.00078	1.48414	1.53525	0.455986	1.42078	1.60144	1.47377	0.498275	0.496183	0.820348	0.0336662	0.260918	0.149776
Leaf_Cluster_B (1531)	Seita.1G366300	-1.25059	-1.48189	-1.46386	0.247992	-0.00401976	-0.0747631	-0.873728	-0.947453	-0.189337	-1.26394	-1.3583	-1.18904	1.3711	1.061	0.778244	0.872997	1.13922	0.891295	0.219828	0.0980946	0.00332695	0.952043	1.32192	1.13986
Leaf_Cluster_B (1531)	Seita.1G367700	-0.985143	-1.18754	-1.20139	-0.654242	-0.471913	-0.762911	-0.488188	-1.05299	-1.34849	-0.881773	-1.23228	-0.48307	1.84021	0.954299	1.44556	0.666566	0.807442	0.456974	0.374352	0.883974	0.338861	1.59887	0.752944	0.62988
Leaf_Cluster_B (1531)	Seita.1G373600	-0.968389	-0.557254	-1.21894	-0.662589	-0.345812	-0.620652	-1.04547	-1.1532	-1.19038	-1.08329	-1.25803	-1.21033	1.26801	1.18081	0.720307	0.818189	0.822696	0.928231	0.730813	0.676886	0.679972	1.12361	1.27969	1.08513
Leaf_Cluster_B (1531)	Seita.1G377800	-0.918989	-1.60482	-1.07399	-0.104241	-0.409963	-0.524298	-1.71865	-1.14611	-1.35357	-0.379824	-0.772294	0.456885	1.10391	0.939744	0.555457	0.805808	0.680652	0.43427	-0.349169	0.550059	0.364873	1.51258	1.54847	1.40322
Leaf_Cluster_B (1531)	Seita.2G002600	-0.437722	-1.19618	-0.377615	-0.383942	-0.217914	-0.185848	-0.987826	-0.823606	-1.15106	-1.60375	-1.60886	-1.52187	1.19108	1.03988	1.2864	0.810286	0.93941	0.944587	0.436625	0.426635	0.164435	1.09175	1.2015	0.963602
Leaf_Cluster_B (1531)	Seita.2G014200	-0.649374	-1.53791	-1.54245	-0.202023	-0.477031	-0.159053	-1.29579	-0.805491	-0.850053	-0.986415	-1.46854	-0.674767	0.728487	0.506913	0.756427	1.21038	1.52849	1.57958	0.542437	0.950572	0.810203	0.771016	0.614466	0.649932
Leaf_Cluster_B (1531)	Seita.2G024600	-0.556096	-1.0625	-0.943798	1.05238	-0.25723	-0.142829	-0.0550367	0.778189	0.158326	-1.16049	-1.89805	-0.0726905	0.969206	0.724659	0.333559	2.34051	1.6423	0.705397	-0.691814	0.230902	0.123229	0.243367	-1.27804	-1.18344
Leaf_Cluster_B (1531)	Seita.2G053300	-0.547445	-0.401224	-0.0784284	-1.03955	-1.01937	-1.03159	-0.824149	-0.881078	-0.815322	-0.7614	-0.989874	-0.375963	1.47979	1.10677	0.853131	1.61285	1.99022	1.51069	0.591802	0.83298	0.607485	-0.716384	-0.500339	-0.603596
Leaf_Cluster_B (1531)	Seita.2G053700	-0.180833	-0.604943	-0.383826	-1.15633	-1.12037	-1.18051	-1.03047	-0.538649	-0.511292	-0.474483	-0.984793	-0.461316	0.873082	0.785221	0.456572	1.94032	2.37078	1.73709	0.358141	0.672579	0.526924	-0.725091	-0.134013	-0.233797
Leaf_Cluster_B (1531)	Seita.2G081000	-0.922542	-1.03885	-0.853234	-0.69418	-0.784992	-0.412207	-1.08312	-0.636634	-0.615377	-1.50169	-1.29266	-1.39453	1.14049	1.13601	1.0799	1.16864	1.05679	1.13756	1.02069	0.877242	0.90092	0.780889	0.616598	0.314294
Leaf_Cluster_B (1531)	Seita.2G092300	-0.804937	-1.03297	-1.37902	-0.768128	-0.776752	-0.759237	-0.486317	-0.685736	-0.969563	-1.24755	-1.3695	-1.04464	0.921458	0.762838	0.632923	0.904937	0.874648	1.12418	1.23064	0.847151	0.567499	1.42118	1.25914	0.777756
Leaf_Cluster_B (1531)	Seita.2G108100	-0.706545	-1.19283	-0.90361	-0.269721	-0.709436	-0.204729	-1.07375	-0.78171	-0.72364	-1.46571	-1.53425	-1.1327	1.39824	0.962648	1.35931	0.388637	0.480287	0.624871	0.505099	0.601477	0.502607	1.42923	1.51007	0.936143
Leaf_Cluster_B (1531)	Seita.2G109200	-0.763029	-1.3548	-0.904144	-0.224635	-0.3683	-0.400095	-1.05458	-1.19314	-0.910666	-1.44048	-1.27359	-0.979895	0.66373	0.747004	1.0677	0.786951	0.770058	0.771238	0.221103	0.792747	0.796536	1.1382	1.53502	1.57707
Leaf_Cluster_B (1531)	Seita.2G118100	-0.816221	-1.56425	-0.453927	0.0645114	-0.0857847	0.419731	-1.09174	-0.853692	-0.826589	-1.75388	-1.95776	-1.01	0.460456	0.72949	0.782211	0.642848	0.342114	1.22858	1.04569	0.814188	1.02045	0.832768	0.940599	1.09021
Leaf_Cluster_B (1531)	Seita.2G119000	-1.16184	-0.686491	-0.9807	-0.969176	-0.984677	-1.04152	-1.05511	-1.05223	-1.07257	-0.554401	-0.922581	-0.669573	1.18458	0.63678	0.473078	0.93716	0.648867	0.905393	0.393725	0.765576	0.756714	1.65424	1.66063	1.13412
Leaf_Cluster_B (1531)	Seita.2G125200	-0.977615	-1.02706	-0.960377	-1.13692	-1.04217	-0.854291	-0.439176	-1.08035	-0.160653	-0.717072	-0.94814	-0.505259	0.988315	1.44626	0.906694	-0.313084	-0.559403	-0.0442395	1.1581	1.16975	0.792575	1.38393	1.25495	1.66522
Leaf_Cluster_B (1531)	Seita.2G129800	-0.698285	-1.23314	-1.17834	-0.939669	-0.809782	-1.48073	-0.986504	-0.991737	-0.974881	-0.710503	-0.863519	-0.248826	1.44479	0.832251	0.700266	1.28796	1.13308	1.01527	0.762943	0.871662	1.28814	0.114323	0.769982	0.895233
Leaf_Cluster_B (1531)	Seita.2G130600	-0.715777	-0.652468	-1.24253	-0.471834	-1.06144	-0.971469	-0.522713	-0.77617	-1.07519	-0.586962	-0.813015	-0.597112	0.843743	0.377613	0.85191	2.87275	0.581205	1.89138	-0.0223404	0.336089	0.0971103	0.492625	0.441687	0.722897
Leaf_Cluster_B (1531)	Seita.2G131500	-0.653931	-1.11902	-1.34282	-0.417763	-0.475639	-0.647878	-0.777805	-1.01642	-0.390322	-1.5064	-1.32855	-1.34391	1.17526	0.981703	0.785585	0.671727	0.702567	0.879357	0.563476	0.7479	0.603338	1.33842	1.13082	1.4403
Leaf_Cluster_B (1531)	Seita.2G136800	-0.991769	-0.910064	-1.13427	0.849495	0.954306	0.696661	-0.892079	-1.16357	-1.13291	-0.963325	-0.89292	-1.12854	1.25503	1.12995	-0.131011	1.79318	1.5399	1.48349	-0.101096	0.296272	0.484999	-0.348436	-0.359151	-0.334148
Leaf_Cluster_B (1531)	Seita.2G141500	-0.77498	-0.654582	-1.10776	-0.81251	-0.945514	-0.871971	-1.02023	-1.05245	-1.18769	-0.969964	-1.17376	-0.874312	1.33745	1.09514	0.922003	1.22196	1.20565	1.19306	0.893933	0.958027	0.856021	0.730165	0.693883	0.338431
Leaf_Cluster_B (1531)	Seita.2G142500	-1.00287	-1.36927	-1.08737	0.442261	0.125023	0.299586	-1.12868	-0.865279	-0.736786	-1.39361	-1.59599	-1.63893	0.566409	0.61102	0.636523	1.20409	1.18869	1.18129	0.687044	0.818709	0.573351	0.890608	0.832886	0.761301
Leaf_Cluster_B (1531)	Seita.2G149000	-1.02213	-1.40336	-1.38456	-0.650847	-0.783585	-0.474418	-1.12426	-0.995476	-0.955024	-0.828423	-0.904354	-0.418944	1.0311	1.07415	1.08006	1.08467	0.974283	1.19058	-0.124371	0.409332	0.547693	1.13749	1.14967	1.39073
Leaf_Cluster_B (1531)	Seita.2G151800	-0.718305	-0.752138	-0.908742	-0.680222	-0.534971	-0.667557	-1.09565	-1.2864	-1.06344	-1.13459	-1.38726	-0.990354	0.883076	0.706779	0.713458	1.30575	1.31455	1.30225	1.06763	1.20062	1.19874	0.444218	0.555365	0.527205
Leaf_Cluster_B (1531)	Seita.2G159000	-0.648014	-0.6971	-1.18377	-1.115	-0.807046	-0.717096	-0.769558	-1.11612	-1.2555	-0.57902	-0.894407	-0.422444	0.891817	0.679185	0.841895	1.82507	1.70259	1.79142	0.897799	0.940202	0.616932	0.238501	-0.104877	-0.115461
Leaf_Cluster_B (1531)	Seita.2G166000	-1.13352	-0.669649	-1.13352	-0.398364	-1.13352	-1.13352	-0.543375	-0.513043	0.132371	-0.483042	0.680996	-1.13352	0.703296	0.410186	-0.0695514	-0.25411	0.681195	0.141197	0.536498	1.20435	0.818913	-1.13352	2.17515	2.24814
Leaf_Cluster_B (1531)	Seita.2G168000	-0.535167	-0.991634	-0.369499	-1.07786	-1.05838	-0.998748	-0.693783	-0.459834	-0.446215	-1.40231	-1.44904	-1.36788	1.05723	1.08876	0.988024	0.857446	0.777652	1.00274	1.27164	1.53436	1.23564	0.309463	0.394297	0.333085
Leaf_Cluster_B (1531)	Seita.2G170600	-1.26889	-1.6778	-1.55753	-0.255901	0.0618522	0.0506387	0.929627	0.201974	-0.951663	-0.578748	-0.679764	-1.00197	0.820799	0.405497	-0.637479	-0.325998	0.149196	0.581488	0.283367	0.410083	-0.458039	1.93302	2.09973	1.4665
Leaf_Cluster_B (1531)	Seita.2G175000	-1.2083	-1.26881	-1.70957	0.0668684	0.155281	-0.115723	-0.505586	-0.184116	-0.323722	-0.802466	-1.3644	-0.849267	0.482968	0.586725	0.805294	0.0303448	0.0767136	0.0240677	0.330945	0.0520288	-0.25623	2.05844	2.05565	1.86287
Leaf_Cluster_B (1531)	Seita.2G177500	-0.950353	-0.943149	-0.91831	-0.645871	-0.824055	-0.756536	-0.936419	-0.982582	-1.16111	-1.14321	-1.20239	-1.1389	1.13139	0.988852	1.23563	1.02381	0.873958	0.905591	0.969885	1.03835	0.77315	1.06463	0.876755	0.720881
Leaf_Cluster_B (1531)	Seita.2G191800	-1.22555	-0.196471	-0.978502	-1.23432	-1.38072	-0.467583	-0.623969	0.0970822	-0.933437	-0.772844	-1.17517	-1.14566	0.307625	1.60969	0.804316	0.23499	0.159477	0.880403	1.18068	1.15387	0.0965974	1.84766	1.33002	0.431834
Leaf_Cluster_B (1531)	Seita.2G193000	-0.854363	-1.03994	-0.932905	-0.760163	-0.720664	-0.53802	-0.999415	-0.742798	-0.704718	-1.37995	-1.34855	-1.35892	0.694761	0.659992	1.26552	1.09089	0.880176	1.08329	1.22748	1.04421	0.775136	1.1155	0.879927	0.663511
Leaf_Cluster_B (1531)	Seita.2G193900	-0.864707	-1.17389	-1.24735	-0.748055	-0.762084	-0.739698	-0.798551	-0.906186	-1.17074	-0.997487	-0.842992	-1.0974	0.451753	0.635879	0.915168	1.27891	1.20418	1.37692	1.30027	1.0716	1.14877	0.725234	0.690619	0.549852
Leaf_Cluster_B (1531)	Seita.2G198100	-0.909719	-1.17751	-1.46233	0.0784286	-0.31673	-0.159273	-0.680225	-0.963231	-1.10781	-1.2943	-1.31024	-0.548151	1.05394	0.602154	0.203696	1.89713	1.79286	1.49857	0.424514	0.575446	0.651761	0.758558	0.342688	0.049757
Leaf_Cluster_B (1531)	Seita.2G199500	-0.526582	-1.20877	-1.11708	-0.276207	-0.176034	-0.100084	-1.01901	-0.9005	-0.87762	-0.918267	-1.19003	-0.644736	-0.0459981	-0.133763	0.405105	2.21963	2.04321	1.77862	0.431923	1.10011	0.547374	0.671179	-0.0755053	0.0130281
Leaf_Cluster_B (1531)	Seita.2G199600	-0.248766	-0.224816	-3.98403	-0.237675	-0.213451	-0.544084	-0.49823	-0.286866	-0.278452	-0.446469	-0.547498	-0.32486	1.05949	0.872642	0.444217	0.704768	0.571291	0.758154	0.614901	0.806122	0.607312	0.626257	0.52577	0.244272
Leaf_Cluster_B (1531)	Seita.2G206200	-0.285938	-0.452736	-0.350798	-0.705778	-0.704677	-0.0869219	-0.633648	-0.930773	-0.989859	-1.64752	-1.12458	-2.35825	0.546113	0.760254	1.16089	0.602654	0.658973	0.368307	0.914457	1.05027	0.808285	1.215	1.3966	0.789689
Leaf_Cluster_B (1531)	Seita.2G209100	-0.502778	-1.86271	-0.304682	-1.92754	-0.951629	-0.800613	0.497072	0.00585312	-1.02267	-0.179516	-0.724494	-0.912362	0.609233	1.18477	1.04755	-0.397402	-0.469739	0.471141	0.838205	0.914386	0.207238	1.62571	1.42363	1.23134
Leaf_Cluster_B (1531)	Seita.2G220400	-0.913627	-0.865311	-1.03334	-0.99552	-0.534619	-0.712338	-0.485779	-1.0505	-0.967889	-0.847985	-0.960116	-1.07212	0.846475	0.485412	1.19639	1.25034	1.89127	1.5547	1.16122	1.0693	0.547685	0.799333	-0.00789992	-0.355084
Leaf_Cluster_B (1531)	Seita.2G228700	-0.726161	-0.953025	-1.14416	-1.09151	-0.423387	-0.865945	-0.754459	-0.484613	-0.878423	-0.922449	-1.0063	-0.885304	0.83345	0.457354	1.64315	2.06736	0.673886	0.904573	1.00267	0.0849725	-0.385396	1.3203	0.182869	1.35054
Leaf_Cluster_B (1531)	Seita.2G229700	-0.754979	-0.981646	-0.872698	-0.534736	-0.861662	0.044328	-0.681261	-0.833723	-1.00036	-1.09243	-1.79203	-1.22762	1.12462	1.0188	1.45946	1.43898	0.772873	1.09719	0.465624	0.746297	0.0627995	1.41169	0.359346	0.631146
Leaf_Cluster_B (1531)	Seita.2G230800	-0.598217	-1.30769	-0.819638	-0.386539	-0.536895	0.608423	-1.08623	-0.729274	-0.802101	-1.24328	-1.38738	-1.22446	-0.0341006	0.220042	0.844067	1.31936	0.825054	0.786753	1.1643	0.500994	-0.357961	1.18607	2.03219	1.02652
Leaf_Cluster_B (1531)	Seita.2G236000	-0.656119	-1.01108	-1.59293	-0.380944	-0.924832	-0.587493	-0.569081	-0.807011	-0.728029	-1.69184	-1.11293	-1.09945	0.970658	0.983643	0.324303	0.965019	0.985817	1.04258	1.09387	1.06148	0.972804	0.776877	0.962935	1.02175
Leaf_Cluster_B (1531)	Seita.2G252300	-0.714732	-0.64597	-1.41854	0.175341	0.752412	-0.298754	-1.27966	-0.846597	-1.32266	-0.392996	-0.552262	-0.596924	0.815427	0.230841	1.09196	1.71688	0.678251	0.726631	1.75463	0.952887	-0.908156	1.56245	-0.380221	-1.10024
Leaf_Cluster_B (1531)	Seita.2G253700	-1.55594	-1.59541	-1.58764	-0.103374	-0.16737	0.188343	-0.723784	-0.589189	-0.577744	-0.913473	-1.51836	-0.69088	0.325018	0.644449	1.31773	0.822973	0.658817	0.932407	0.14414	0.404102	0.316215	1.45429	1.50402	1.31066
Leaf_Cluster_B (1531)	Seita.2G255100	-0.689097	-0.502785	-1.0803	0.141976	-0.103532	0.111955	-1.69127	-1.1559	-1.31356	-1.45578	-1.1888	-0.930912	1.8477	0.840778	0.743658	0.962022	1.17136	1.32277	0.432405	1.03247	0.45522	0.256383	0.69582	0.0974341
Leaf_Cluster_B (1531)	Seita.2G258900	-0.787245	-0.620979	-0.747786	-0.594743	-0.611667	-0.720633	-1.11785	-0.719788	-1.05714	-1.25771	-1.19352	-1.36979	1.22819	1.16965	0.903782	1.33487	1.26334	1.63034	1.04108	0.789187	0.788077	0.344164	0.467819	-0.161639
Leaf_Cluster_B (1531)	Seita.2G260500	-0.886097	-1.11583	-0.942836	0.295304	-0.144348	0.005892	-0.969421	-1.00947	-1.04893	-0.970261	-0.906905	-1.0832	0.546369	0.103898	0.933431	2.08877	2.08014	1.82191	0.135066	0.0175673	-0.178567	0.795077	0.143723	0.288712
Leaf_Cluster_B (1531)	Seita.2G262300	-1.12087	-1.33076	-0.686106	-1.14532	-0.875863	-0.692996	-1.24542	-1.00993	-1.00859	-0.0050434	-0.582808	-0.447846	-0.240887	-0.288225	0.514722	1.38929	0.909797	0.841354	1.71062	1.20925	0.535276	1.29934	1.12088	1.15014
Leaf_Cluster_B (1531)	Seita.2G262500	-0.799981	-0.525331	-0.984815	-0.955411	-0.504554	-0.772567	-0.633997	-0.573026	-1.5777	-0.928969	-1.18529	-1.26958	1.59587	1.56797	0.779085	0.133779	0.120569	1.1087	1.12254	1.18945	0.539471	1.24786	0.630479	0.675451
Leaf_Cluster_B (1531)	Seita.2G280000	-0.934449	-0.496495	-0.940602	-0.0967742	0.490699	-0.130744	-0.733325	-0.34652	-0.666611	-1.0065	-1.04472	-0.87794	1.03597	0.470857	1.69676	-1.40198	0.606427	0.888738	2.30723	1.26154	-0.490764	1.30551	-0.13827	-0.758046
Leaf_Cluster_B (1531)	Seita.2G280100	-1.06928	-1.1194	-1.40023	0.130147	0.648251	-0.0517849	-1.00779	-0.604925	-1.24716	-0.739586	-0.715989	-0.1486	0.462749	-0.0084025	1.54567	0.736009	0.547788	0.232468	2.06816	0.764027	-1.014	2.11194	0.345284	-0.465333
Leaf_Cluster_B (1531)	Seita.2G283500	-0.695303	-1.80011	-0.57988	0.748555	0.282925	1.5374	-0.537089	-0.791994	-0.210875	-1.52365	-1.70917	-0.533445	0.0651656	1.3198	1.2179	1.55418	0.822624	1.49496	0.0550728	0.408576	-0.309191	-0.76671	0.11161	-0.161355
Leaf_Cluster_B (1531)	Seita.2G284000	-0.52179	-1.54465	-1.23279	-0.569264	-0.213094	-0.0169512	-1.00323	-0.662796	-1.0128	-1.31418	-1.21369	-1.28578	1.13936	0.77368	0.563064	1.01466	0.820675	1.51585	1.05502	0.894805	0.0747541	1.24267	1.15414	0.34234
Leaf_Cluster_B (1531)	Seita.2G285600	-0.541721	-0.627002	-0.0713504	-1.02746	-1.08696	-0.616912	-0.688908	-0.831787	-0.990599	-1.36137	-1.698	-1.2151	1.02368	0.644955	1.35009	1.23139	1.15952	0.928358	0.116413	0.88273	0.269033	1.1445	1.2606	0.745908
Leaf_Cluster_B (1531)	Seita.2G290300	-0.655161	-0.754596	-0.815537	-0.900757	-0.787412	-0.923683	-0.850687	-0.937628	-0.873442	-1.06557	-1.06668	-1.08882	0.906312	0.874734	1.15161	1.78456	1.62927	1.70698	0.689832	0.681565	0.669877	0.251106	0.327208	0.0469046
Leaf_Cluster_B (1531)	Seita.2G291500	-1.42873	-1.33579	-0.935578	0.0508792	-0.403555	-0.307668	-0.400429	-0.448172	-0.355278	-0.923218	-1.0785	-1.37681	0.522604	0.912784	0.987029	0.635261	0.973296	0.427227	-1.07179	0.47288	-0.00363292	1.60366	1.82839	1.65514
Leaf_Cluster_B (1531)	Seita.2G298200	-1.3715	-1.02855	-0.313308	-0.224559	0.137678	-0.76189	-0.640056	-1.15769	-1.12471	-1.11781	-1.24185	-0.890883	0.762439	1.18031	1.42236	1.10653	0.809819	1.23957	-0.406346	-0.215413	0.16506	0.624925	1.64643	1.39944
Leaf_Cluster_B (1531)	Seita.2G304400	-1.2092	-1.87286	-1.31944	-0.7493	-0.343419	-0.667384	-0.828634	-1.17079	-0.673426	-0.913023	-0.5301	-0.763762	0.957437	0.98579	0.99083	0.821575	0.888483	1.30283	0.952107	0.982954	0.99065	0.145537	1.04209	0.981067
Leaf_Cluster_B (1531)	Seita.2G304700	-0.510828	-0.630807	-0.49445	-0.969517	-0.892275	-0.736445	-0.97938	-1.04886	-1.25569	-0.906359	-1.36941	-1.09051	0.58238	0.657802	1.68665	1.54362	1.21841	1.56272	0.763397	0.840348	0.691741	0.407475	0.419391	0.510597
Leaf_Cluster_B (1531)	Seita.2G333600	-2.46546	-2.46546	-2.46546	-0.012526	0.264832	-0.15682	0.00923715	0.290538	0.213454	0.335089	0.201123	0.549545	0.877373	0.583511	0.53342	-0.177507	-0.135495	0.16864	0.445882	0.588729	0.49377	0.808573	0.860339	0.654663
Leaf_Cluster_B (1531)	Seita.2G342900	-1.44449	-1.9391	-1.9391	0.920047	-0.966733	1.40946	0.178192	1.2282	0.399538	0.637364	-1.72098	-0.577076	-0.0215298	0.900908	0.784871	0.566176	0.648598	1.10421	0.38324	0.571638	-0.108853	-0.293357	-0.313554	-0.407672
Leaf_Cluster_B (1531)	Seita.2G351400	-0.672635	-0.630894	-0.931265	-0.353394	-0.550673	0.445264	-0.740996	-1.03535	-1.35156	-1.30043	-1.75573	-1.07813	0.186512	0.909563	1.4167	1.07623	0.626977	0.536297	0.2228	0.695431	0.932242	2.08642	0.577173	0.689453
Leaf_Cluster_B (1531)	Seita.2G352400	-0.703452	-0.550028	-0.777929	-0.824456	-0.824456	-0.824456	-0.773637	-0.778335	-0.824456	-0.591275	-0.824456	-0.611647	0.466058	0.805918	0.0575044	1.59174	1.99486	1.81088	1.13378	1.38003	1.2461	-0.548373	-0.383418	-0.64649
Leaf_Cluster_B (1531)	Seita.2G353400	-0.141383	-0.899931	-0.42754	-1.61445	-0.984694	-1.16118	-0.381665	-0.598925	-0.662086	-0.743913	-0.939123	-0.52521	0.599683	0.678109	1.47721	1.88682	1.86513	2.00608	0.332138	0.14096	0.107867	0.275339	0.0612139	-0.350457
Leaf_Cluster_B (1531)	Seita.2G353800	-0.295636	-0.21516	-0.825125	-0.576894	-0.518913	-0.603474	-1.6907	-1.86629	-2.24577	-0.210793	-0.274641	-0.117845	1.10845	1.16987	1.03583	1.14311	0.890093	1.22452	1.00707	0.394786	0.0479612	0.948334	0.588542	-0.117332
Leaf_Cluster_B (1531)	Seita.2G373600	-0.787863	-1.49647	-0.822966	-0.54469	-0.0717678	-0.288064	-1.13043	-1.07978	-0.874126	-1.16733	-1.40791	-1.08131	1.15399	0.469811	1.65312	1.15536	0.668466	1.0178	0.776467	0.855138	0.322151	1.34528	0.906239	0.428884
Leaf_Cluster_B (1531)	Seita.2G381600	-0.555692	-1.07718	-0.420574	-1.03888	-0.580911	-1.29747	-1.03718	-0.821392	-1.1363	-0.999961	-1.12221	-0.86962	1.22656	0.354786	1.03806	1.13848	1.07548	1.29859	1.27896	1.29141	1.05394	0.854863	0.44214	-0.0958712
Leaf_Cluster_B (1531)	Seita.2G381700	-0.692288	-0.958081	-0.799532	-0.814721	-0.730535	-0.872643	-0.656745	-1.21352	-0.890255	-1.18403	-1.33357	-1.27417	1.41002	1.00168	0.648307	0.749345	1.13162	1.20714	0.824292	0.718455	0.758588	0.807203	1.2047	0.958749
Leaf_Cluster_B (1531)	Seita.2G382600	-1.05218	-0.92967	-1.02238	-0.961212	-1.07822	-0.762822	-0.689169	-0.853257	-1.00323	-0.962936	-1.15937	-0.979862	0.96358	1.1962	0.94635	0.526646	0.523454	0.910818	0.924237	0.9663	0.591805	1.40732	1.26305	1.23454
Leaf_Cluster_B (1531)	Seita.2G395000	-0.329593	-0.398827	-0.70041	-0.561111	-0.656161	-0.519103	-1.53591	-1.32293	-1.2216	-1.29814	-1.18394	-1.20339	1.49502	1.32516	1.27614	0.90499	0.846353	0.912464	0.63823	0.574448	0.473209	1.00131	0.879881	0.603912
Leaf_Cluster_B (1531)	Seita.2G397700	-0.718912	-0.859636	-0.815859	-0.695595	-0.880182	-0.725407	-0.872092	-0.905842	-1.084	-1.13444	-1.56396	-0.690344	1.62102	0.910445	1.17133	0.441194	0.388826	0.243341	0.43413	0.758279	1.2718	1.32617	0.94162	1.4381
Leaf_Cluster_B (1531)	Seita.2G428800	-0.71954	-1.78909	-1.11519	-0.664528	-0.217123	-0.488986	-1.29555	-0.71696	-0.864023	-0.085782	-1.09331	0.117054	0.749566	2.09216	0.76286	0.607802	1.31552	0.835641	-0.496885	0.149308	-0.391333	0.523522	1.03112	1.75375
Leaf_Cluster_B (1531)	Seita.2G429400	-0.916065	-1.55521	-1.12566	-1.35683	-0.811964	-0.610381	-0.267554	-0.496791	-1.43663	-0.689241	-1.03835	-0.762433	0.584328	0.824795	1.61881	0.987793	0.843522	0.696195	1.27655	0.910518	0.964504	0.897073	0.791757	0.67128
Leaf_Cluster_B (1531)	Seita.2G430500	-1.37089	-1.86082	-1.03025	0.824479	0.0137079	0.191961	0.18141	0.0643764	0.588999	-1.07593	-1.90656	-1.11171	0.040374	-0.185823	0.352132	-0.186643	0.0912531	-0.485095	0.519755	1.21502	0.664458	1.13376	1.71157	1.62046
Leaf_Cluster_B (1531)	Seita.2G437500	-1.63189	-1.62804	-1.63822	-0.317463	-0.0355212	-0.239644	0.21986	0.24221	0.111077	-0.639832	-0.742177	-0.690827	-0.656309	-1.06039	-0.893659	1.22876	0.941783	1.1193	1.5833	1.33737	0.862146	1.10892	0.770394	0.648856
Leaf_Cluster_B (1531)	Seita.2G438500	-0.997868	-1.55504	-1.24165	-1.0329	-0.788832	-0.766812	-0.904902	-0.826977	-1.12336	-0.518338	-0.498712	-0.289491	0.0510792	0.0925722	0.3983	1.54547	1.51031	1.53922	1.13726	1.14009	1.11603	0.700641	0.649694	0.66422
Leaf_Cluster_B (1531)	Seita.2G443900	-1.02078	-1.58053	-1.14736	-0.534241	-0.936054	-0.911041	-0.894311	-0.492669	-0.886381	-0.904597	-0.622413	-0.382515	0.951221	1.50876	0.586835	1.25895	1.40232	2.02869	0.39712	0.927951	0.480769	-0.149683	0.255553	0.664409
Leaf_Cluster_B (1531)	Seita.3G006400	-1.73779	-1.7756	-1.21874	-0.866527	-1.58035	-0.766909	-0.122793	-0.725254	-0.679377	0.334272	0.14002	0.439748	1.41134	1.09728	0.294719	0.846156	0.42758	-0.441666	0.650185	-0.100542	0.797816	0.850367	0.980099	1.74597
Leaf_Cluster_B (1531)	Seita.3G008300	-0.902183	-1.32538	-1.18137	-0.12553	0.775233	-0.741929	-0.406064	-0.874973	-1.49095	0.34748	-0.486199	-0.256622	0.616675	0.164939	1.47755	1.17631	0.273052	0.128931	1.99646	0.861529	-1.07567	1.93803	-0.138003	-0.751324
Leaf_Cluster_B (1531)	Seita.3G028800	-0.453331	-1.40407	-1.51619	0.107616	-0.0992116	-1.19218	-0.695618	-1.07833	-0.162345	-0.819558	-0.924408	-1.02722	1.06284	1.48404	0.0698639	0.553587	-0.396883	0.224588	-0.0435869	0.756987	0.680498	1.74652	1.57371	1.5527
Leaf_Cluster_B (1531)	Seita.3G030200	-1.50127	-1.19433	-1.50381	-1.32299	-1.52401	-1.25057	0.473352	0.734975	0.146224	0.524057	0.275197	1.12627	1.11676	0.0145345	0.402084	-0.730058	-0.642321	-0.301868	-0.00860122	0.472651	0.550655	0.955001	1.43482	1.75325
Leaf_Cluster_B (1531)	Seita.3G055400	-0.742203	-0.0654506	-0.778354	-0.962529	-1.10254	-0.616639	-0.389204	-0.926909	-1.2608	-1.37638	-1.24293	-1.1672	1.49975	1.17805	1.26877	1.71093	1.09934	0.879235	0.592436	0.568639	0.325054	0.814468	0.154088	0.540381
Leaf_Cluster_B (1531)	Seita.3G075600	-1.29916	-1.97127	-1.76173	-0.841472	-0.374705	-0.799486	-0.764266	-0.515286	-0.853512	-0.063866	-0.0955687	-0.034882	1.09134	1.46597	0.437686	-0.190299	-0.322278	1.2277	0.863165	0.833706	0.329433	1.42873	1.23024	0.979821
Leaf_Cluster_B (1531)	Seita.3G077100	-1.48133	-2.22565	-1.32032	0.549388	0.138931	0.20899	-1.12783	-0.706012	-0.380515	-0.958313	-0.873755	-0.328323	-0.20755	-0.428829	0.0310607	1.2952	1.16586	0.949749	0.774529	0.791184	0.592908	1.30503	1.33352	0.902084
Leaf_Cluster_B (1531)	Seita.3G084000	-1.22014	-1.15043	-0.793809	-0.143555	0.104897	-0.264773	-0.949722	-1.23632	-0.969938	-1.22975	-1.53366	-1.37664	1.17126	1.16365	0.964771	0.699479	0.76454	0.969596	0.664642	0.502582	0.617001	0.873362	1.16124	1.21171
Leaf_Cluster_B (1531)	Seita.3G087100	-0.942211	-0.66323	-0.762535	-0.160965	-0.233767	-0.17046	-0.754995	-0.67896	-1.01523	-1.7711	-1.77201	-1.65522	1.18701	0.967046	1.13578	0.600009	0.552455	0.554	1.06123	1.0626	0.958865	0.876626	0.941214	0.68384
Leaf_Cluster_B (1531)	Seita.3G093500	-0.975711	-0.403579	-0.636557	-0.799755	-0.627946	-0.524324	-0.884226	-1.0624	-1.34607	-1.12241	-1.43456	-1.40794	1.41753	1.18398	0.99167	1.09101	1.01863	1.07132	0.652907	0.779044	0.824923	0.853813	0.80633	0.534318
Leaf_Cluster_B (1531)	Seita.3G095700	-0.487614	-0.590991	-0.772766	-0.467721	-0.194326	-0.385455	-1.24274	-1.5949	-1.2979	-0.915575	-1.55301	-1.02315	0.547525	0.752912	1.57381	1.22808	0.993325	1.0638	0.351431	0.290985	0.286836	0.842399	1.25392	1.34112
Leaf_Cluster_B (1531)	Seita.3G102200	-1.18786	-0.984969	-1.13831	-0.305232	-0.716765	-0.693975	-0.704793	-0.528582	-0.576638	-1.42201	-1.09116	-1.57508	1.48706	0.947894	0.706203	1.03722	0.993205	1.13018	1.31068	1.04713	0.986093	0.688355	0.45178	0.139581
Leaf_Cluster_B (1531)	Seita.3G103300	-0.907209	-1.10521	-1.99846	0.839961	1.09654	0.509824	-1.18286	-0.174323	-0.590152	-1.28793	-0.916412	-0.966202	1.3239	0.446214	0.650638	1.46888	0.447071	0.914032	1.12035	-0.0378175	-0.749646	1.40981	0.128462	-0.43945
Leaf_Cluster_B (1531)	Seita.3G108200	-1.17523	-0.794111	-0.812695	-0.410726	-0.558967	-0.417608	-1.05521	-1.17523	-1.17523	-0.93408	-1.17523	-0.934259	1.82677	0.73128	1.42729	1.33742	1.27112	0.317597	0.251846	1.21749	0.232011	1.12687	0.434626	0.44425
Leaf_Cluster_B (1531)	Seita.3G110100	-1.22299	-1.56521	-1.68558	-0.723766	-0.590921	-0.438672	-0.065675	0.116615	-0.639099	-0.344453	-0.340769	-0.395348	0.611766	0.828971	0.864146	1.43292	1.5684	1.44557	-0.359486	-0.953106	-0.970374	1.0169	1.17749	1.23267
Leaf_Cluster_B (1531)	Seita.3G110200	-0.841359	-1.06474	-1.13649	-0.460718	-0.348168	0.00477429	-0.492478	-0.422168	-0.990042	-1.19928	-1.353	-1.43623	0.853352	0.894305	1.06326	1.69366	1.54873	1.73357	0.395941	-0.040583	-0.443077	0.919538	0.703912	0.417292
Leaf_Cluster_B (1531)	Seita.3G111800	-0.760051	-0.68572	-1.12831	-0.495289	-0.373394	-0.407951	-1.12845	-1.02827	-0.756703	-1.54375	-1.62672	-1.06711	0.499168	0.730935	0.567475	0.684615	0.674048	1.07379	1.29829	1.26831	1.08158	1.07717	1.30319	0.743165
Leaf_Cluster_B (1531)	Seita.3G117900	-1.44624	-1.84666	-1.62837	0.15641	-0.164901	0.0455973	-0.872558	-0.748942	-0.125347	-0.0925904	-0.544754	0.739649	0.144142	-0.567588	0.458725	0.508939	0.558615	0.0347978	-0.440741	0.0422026	-0.0187201	2.02335	2.00086	1.78412
Leaf_Cluster_B (1531)	Seita.3G120200	-0.434245	-0.282778	-0.904256	-0.939644	-0.564319	-0.911757	-0.877735	-1.26342	-1.24592	-0.978189	-1.21022	-0.862134	0.860744	0.426554	0.489508	1.74663	1.57512	1.75933	1.06705	0.891878	0.934508	0.278809	0.112474	0.332004
Leaf_Cluster_B (1531)	Seita.3G138700	-0.902402	-0.925203	-0.85677	-0.997587	-0.976521	-0.847057	-0.874133	-0.896436	-0.947402	-1.05472	-1.03623	-0.909255	0.521608	0.446152	0.762262	1.41989	1.48419	1.47426	1.15042	1.17364	1.1989	0.416343	0.629564	0.546478
Leaf_Cluster_B (1531)	Seita.3G139000	-0.401727	-0.13969	-0.060392	-0.623716	-0.726524	-0.464248	-1.09518	-0.832928	-0.868116	-1.54422	-2.21787	-1.39148	1.3845	1.04951	1.31662	0.895448	0.779899	0.83054	0.770982	0.906418	0.706512	0.60228	0.695775	0.427603
Leaf_Cluster_B (1531)	Seita.3G139400	-0.767679	-2.03318	-1.43652	-0.203293	0.344056	0.557787	-0.227021	-0.0992329	-1.56736	0.146445	-1.23155	-0.65307	0.637243	0.00684124	1.41781	0.339511	0.460531	-0.0073515	-0.717157	1.33359	-0.247508	0.759404	1.09157	2.09613
Leaf_Cluster_B (1531)	Seita.3G140700	-0.961021	-1.36339	-1.01348	-0.377321	-0.883337	-0.837978	-0.867703	-1.06768	-0.879521	-1.05897	-0.902786	-1.26347	0.927131	0.887438	0.523703	0.965725	0.969315	1.03858	1.24702	1.09173	1.07851	0.715203	1.07702	0.955288
Leaf_Cluster_B (1531)	Seita.3G144000	-0.794573	-1.01707	-0.908799	-0.921663	-0.603697	-0.749229	-0.690199	-0.801768	-0.687187	-1.30952	-1.29242	-1.56138	0.774105	0.884793	0.643293	1.02586	1.26403	1.19502	1.26618	0.960641	1.14102	0.865409	0.662907	0.654238
Leaf_Cluster_B (1531)	Seita.3G150900	-0.723767	-0.792593	-0.948522	0.681076	0.643537	0.460313	-1.12335	-1.08034	-1.36478	-1.448	-1.65908	-1.31741	1.04884	1.03849	0.179458	0.998002	0.779155	0.913689	0.193971	0.0279219	0.00371054	1.34895	1.37349	0.767246
Leaf_Cluster_B (1531)	Seita.3G151000	-1.01984	-1.16022	-1.31315	-0.623678	-0.642344	-0.819244	-0.734258	-0.944291	-0.933175	-0.956398	-1.20902	-0.833763	1.49649	1.27651	0.7419	1.2832	1.39808	1.17756	0.478183	0.749299	0.72581	0.317388	0.884613	0.660338
Leaf_Cluster_B (1531)	Seita.3G151100	-0.896413	-0.924959	-0.763673	-1.10237	-0.805695	-0.801467	-0.970107	-0.919723	-1.04922	-0.905648	-1.02039	-1.20281	1.18716	0.817072	1.42893	1.38045	1.23724	1.28579	0.582741	0.699381	0.493212	0.907014	0.828956	0.51452
Leaf_Cluster_B (1531)	Seita.3G152100	-0.37859	-1.42928	-0.312083	-0.010534	-0.888504	-0.434865	-1.09233	-0.871448	-1.21352	-1.11075	-1.50708	-0.82448	1.23199	0.382693	1.77185	0.604996	0.458724	0.13903	0.154654	0.603924	0.465755	1.27787	1.63863	1.34336
Leaf_Cluster_B (1531)	Seita.3G154700	-1.16003	-0.646928	-0.975581	0.316762	-0.150562	0.665975	-1.21735	-0.918397	-1.66308	-0.999904	-1.43792	-0.642791	0.498914	0.957339	1.28018	1.22372	0.572547	0.224169	0.0343603	0.38634	-0.321931	2.04973	0.680557	1.24387
Leaf_Cluster_B (1531)	Seita.3G161900	-0.734185	-1.28875	-1.66706	-0.468944	-1.33417	-0.763174	0.0521458	0.289445	0.0366103	-0.603623	-0.847762	-1.46003	-0.564908	1.66125	0.568576	-0.309802	0.770355	-0.0379415	1.56485	0.759677	1.33553	0.767007	0.967641	1.30725
Leaf_Cluster_B (1531)	Seita.3G164700	-0.72838	-0.972385	-1.00435	-0.602362	-0.504624	-0.417346	-1.02298	-0.933833	-0.897757	-1.46363	-1.31639	-1.39517	0.917341	0.953859	1.05958	1.15281	1.11783	1.22382	0.72995	0.807956	1.30052	0.693531	0.754803	0.547213
Leaf_Cluster_B (1531)	Seita.3G165100	-1.1485	-0.616334	-1.3293	-0.190125	-0.575063	-0.671448	-0.967666	-1.13842	-1.00989	-0.987622	-1.24344	-1.13769	1.36478	1.23641	0.894568	0.970002	0.938039	1.07395	0.19949	0.341584	0.503329	1.11109	1.17405	1.2082
Leaf_Cluster_B (1531)	Seita.3G193800	-0.176693	-0.458731	-0.0101835	-1.26532	-0.719393	-0.971487	-0.638769	-0.543974	-1.31995	-1.07544	-1.30252	-1.26944	1.01396	0.87733	1.28188	1.05004	1.12894	1.13958	1.4057	1.54077	1.04237	-0.0551761	-0.305611	-0.367885
Leaf_Cluster_B (1531)	Seita.3G198800	-0.712025	-0.970123	-1.30366	-0.298902	-0.582961	-0.528209	-1.28276	-1.01692	-0.769357	-1.01875	-1.02909	-0.65788	0.46573	0.491516	1.31607	1.79011	1.66409	1.93056	0.557534	0.542147	0.645355	-0.137574	0.421574	0.483525
Leaf_Cluster_B (1531)	Seita.3G206500	-0.900992	-0.927348	-0.860775	-0.85355	-0.862171	-0.879423	-0.855424	-0.845151	-0.879594	-0.822975	-0.950822	-0.927506	0.415337	0.239056	0.671053	0.949148	1.11046	1.25213	1.84672	1.66741	1.49622	0.462541	0.753122	-0.297458
Leaf_Cluster_B (1531)	Seita.3G209800	-0.843873	-0.323673	-1.28102	-0.976903	-0.987175	-1.03774	-0.768717	-0.893632	-0.956599	-0.983095	-1.28504	-0.752656	1.02265	0.810011	0.494228	1.28512	1.30688	1.21518	1.30579	1.23317	1.25059	0.498505	0.377486	0.29051
Leaf_Cluster_B (1531)	Seita.3G212000	-0.613677	-1.13484	-0.9057	-0.19763	-0.279545	-0.198753	-1.04489	-1.24837	-1.28508	-1.49856	-1.4396	-1.10796	0.821159	0.644327	0.611574	1.24693	1.02194	1.21769	1.08391	0.930047	0.848915	1.03731	0.840267	0.650519
Leaf_Cluster_B (1531)	Seita.3G215600	-0.954153	-0.681305	-1.21182	-0.223105	-0.295973	-0.408575	-0.915344	-1.1172	-0.871404	-1.38832	-1.05902	-1.65716	1.14606	1.44123	0.823073	1.07876	1.24302	1.32265	0.186287	0.896883	0.548326	0.882157	0.485327	0.729618
Leaf_Cluster_B (1531)	Seita.3G217800	-0.770965	-0.941749	-0.919478	-1.14562	-0.744862	-0.739561	-0.303399	-0.530273	-1.17106	-0.978903	-1.29689	-1.30133	1.16998	1.4476	1.03412	0.112841	0.191748	0.634017	0.915197	0.893116	0.495012	1.58857	1.21563	1.14626
Leaf_Cluster_B (1531)	Seita.3G218800	-0.303749	-0.522947	-0.410919	0.104072	0.105777	-0.118059	-0.586343	-0.854807	-0.584414	-2.18471	-2.13493	-1.74456	0.861209	0.89197	0.735717	1.12391	1.09312	0.996617	0.985172	1.0021	0.0552657	0.24951	1.00715	0.233843
Leaf_Cluster_B (1531)	Seita.3G218900	-0.854071	-0.642525	-0.968846	-0.717185	-1.06639	-1.02324	-0.750005	-1.04071	-0.785009	-1.16491	-1.10422	-1.0963	1.16749	1.01228	1.0946	0.290453	0.396435	0.68442	0.798069	0.938471	0.642375	1.2716	1.6615	1.25572
Leaf_Cluster_B (1531)	Seita.3G220500	-1.11487	-1.49553	-1.11745	-0.822667	-0.718675	-0.702321	-0.565654	-0.760424	-0.392454	-0.931644	-0.811778	-0.916193	-0.162247	0.127624	0.54943	1.64478	1.64292	1.63603	1.12011	1.11708	1.17823	0.23613	0.604425	0.655149
Leaf_Cluster_B (1531)	Seita.3G224900	-1.10203	-0.805181	-1.66237	-0.873764	-0.922859	-0.595238	-0.632968	-0.88187	-0.611894	-0.898616	-0.955871	-1.23467	1.09182	1.55832	0.779981	0.917957	0.51836	1.05252	0.499434	0.564559	0.784263	0.893548	1.18831	1.32826
Leaf_Cluster_B (1531)	Seita.3G268500	-1.04397	-0.68267	-0.935066	-0.912912	-0.620157	-0.546146	-0.651424	-0.72394	-1.16626	-0.78134	-0.920847	-1.16897	0.890393	0.256571	1.58468	2.15981	1.46844	1.11106	0.714616	0.39072	-0.260467	1.2095	0.0872401	0.541131
Leaf_Cluster_B (1531)	Seita.3G286100	-0.83965	-1.11536	-0.854872	-0.88877	0.0618135	-0.619818	-0.656498	-1.15456	-1.10331	-0.680931	-0.932882	-1.00926	1.2425	0.800262	1.58692	1.7123	0.2946	0.0955263	0.96866	0.901929	-0.0746727	2.02237	0.438824	-0.195127
Leaf_Cluster_B (1531)	Seita.3G298100	-0.828582	-0.874819	-0.981479	-0.966202	-0.915126	-0.924619	-0.907472	-0.980901	-0.983124	-1.0233	-1.00031	-1.0233	0.495076	0.358485	0.484155	1.05513	1.10918	1.25861	1.3569	0.885947	0.918335	1.24541	1.26655	0.975443
Leaf_Cluster_B (1531)	Seita.3G315000	-0.603812	-1.47481	-1.03223	-0.08072	-0.117686	-0.437959	0.400385	-0.601548	-0.762284	-0.481141	-1.14184	-0.0497706	0.149996	-0.0755166	0.658214	-0.731442	-0.919718	-1.02153	1.49392	2.06041	2.18612	1.19462	0.628131	0.760205
Leaf_Cluster_B (1531)	Seita.3G320700	-0.559256	-0.358817	-0.557651	-0.479896	-0.695586	-0.376474	-1.10445	-1.40021	-1.18641	-1.2941	-1.61117	-1.23234	0.85669	1.78471	0.862759	1.01673	0.57107	0.598743	0.839415	0.78743	0.548273	1.12455	0.902696	0.963272
Leaf_Cluster_B (1531)	Seita.3G353200	-1.04909	-0.972434	-1.2657	-0.800311	-0.468391	0.416057	-0.611869	-0.312318	-0.433715	-1.232	-1.09102	-1.56313	0.272018	0.556051	0.312072	0.270124	0.0889085	0.73471	0.419521	1.01257	0.305655	2.07878	2.00863	1.32489
Leaf_Cluster_B (1531)	Seita.3G353500	-1.05551	-0.969017	-1.18125	-1.04685	-0.601042	-1.24982	-0.485034	-0.769619	-0.774691	-0.607612	-0.75507	-0.777574	1.21662	0.702892	1.63389	1.55008	0.986105	1.06776	1.43978	1.08273	0.233881	0.954133	-0.21272	-0.382075
Leaf_Cluster_B (1531)	Seita.3G357700	-0.739026	0.157843	-0.579093	-0.731111	-0.980446	-0.825588	-1.08959	-1.17083	-0.956707	-1.05821	-1.80868	-1.12926	1.22745	1.14963	1.32301	1.14846	0.987465	0.9623	0.760226	0.804977	0.812994	0.356505	0.774818	0.602866
Leaf_Cluster_B (1531)	Seita.3G367000	-1.04238	-0.960965	-1.2107	-0.675745	-0.909268	-0.89402	-0.755983	-0.481419	-0.821561	-1.14073	-0.962027	-0.691526	1.62809	1.17163	0.162022	1.57424	1.74278	1.48138	0.171525	0.297557	0.467041	0.580804	0.733919	0.535335
Leaf_Cluster_B (1531)	Seita.3G368700	-0.82349	-0.888664	-0.425243	-0.543383	-0.776622	-0.653252	-1.06296	-1.28027	-0.747872	-1.31247	-1.53543	-1.28374	0.835094	0.78641	0.868701	0.645841	1.01851	0.878402	1.11257	0.964019	0.94019	0.97021	1.20583	1.10761
Leaf_Cluster_B (1531)	Seita.3G369200	-0.708801	-0.858077	-0.90508	-0.697405	-0.538945	-0.167497	-0.710265	-0.966	-0.966	-0.966	-0.901427	-0.790681	1.3997	0.365673	1.67361	2.22813	0.817907	0.579888	-0.281715	-0.062415	-0.423961	1.95854	0.527715	0.393105
Leaf_Cluster_B (1531)	Seita.3G373000	-0.824355	-1.22368	-1.07657	-0.382738	-0.483383	0.187906	-1.07383	-0.741081	-0.591189	-1.50885	-1.3799	-1.4098	0.577555	0.881431	0.851204	0.659585	0.437519	1.33997	1.66699	1.42191	0.856385	0.688397	0.817171	0.309352
Leaf_Cluster_B (1531)	Seita.3G373100	-0.857428	-0.983502	-1.65019	0.261883	0.190902	0.105849	-1.24559	-1.00677	-1.3266	-1.07095	-1.59482	-1.01316	0.956964	0.724157	0.573112	1.19612	0.98859	1.07491	1.07928	0.835313	0.500001	1.10715	0.776283	0.378502
Leaf_Cluster_B (1531)	Seita.3G373500	-0.729682	-1.03015	-0.729316	-0.334961	-0.440023	-0.371736	-1.21097	-1.02569	-1.61493	-0.738978	-1.03289	-0.775544	0.663822	0.605299	0.0971858	1.73394	1.83402	1.60269	0.661682	1.29485	1.05893	0.278663	0.106333	0.0974714
Leaf_Cluster_B (1531)	Seita.3G390000	-1.46433	-1.80553	-1.47525	-0.14941	0.0945758	0.0967291	-0.98758	-1.16197	-1.22094	-0.738828	-0.60309	-0.884007	0.720808	0.490645	0.273963	1.26093	1.21284	1.14973	0.616081	0.690127	0.998798	1.04449	0.836944	1.00427
Leaf_Cluster_B (1531)	Seita.3G402100	-1.19013	-1.41314	-1.08168	-0.541502	-0.586761	-0.189985	-0.92351	-1.06519	-1.11835	-0.418447	-1.03491	-0.452158	1.06636	0.578635	1.31023	0.215588	0.16703	0.110302	0.242979	0.576985	0.535367	1.62865	1.67632	1.90732
Leaf_Cluster_B (1531)	Seita.3G406500	-1.02421	-1.10503	-0.378641	-0.26885	-0.690143	-0.406819	-0.789919	-0.70326	-1.03267	-1.13641	-2.09331	-0.847378	2.02239	0.975087	0.987773	0.964367	1.14542	0.83852	0.317162	0.71759	0.684907	0.603168	0.876075	0.344183
Leaf_Cluster_B (1531)	Seita.4G016400	-0.921213	-0.965338	-0.848286	-1.01053	-0.886718	-0.879159	-0.340638	-0.758889	-0.940248	-0.810884	-0.963019	-0.805755	0.823899	0.570104	2.15202	1.28439	0.973173	0.993833	1.51671	1.1706	0.0760188	1.04828	-0.233375	-0.244989
Leaf_Cluster_B (1531)	Seita.4G020000	-0.669116	-0.592069	-0.864128	-0.0306588	-0.678113	-0.0012097	-1.02657	-1.29151	-1.11882	-0.975429	-1.55442	-1.23858	1.71837	1.45393	0.602414	1.38397	1.19853	0.657983	0.465326	1.0042	1.11514	-0.349061	0.428392	0.361425
Leaf_Cluster_B (1531)	Seita.4G022700	-0.6947	-1.21239	-1.57438	0.82067	1.17134	0.361942	-1.31416	-1.06662	-1.37388	-0.743431	-1.06354	-0.985317	0.323153	0.0222722	0.163833	1.01166	0.433925	0.781608	1.37261	1.18497	-0.466308	1.67703	0.704685	0.46502
Leaf_Cluster_B (1531)	Seita.4G035500	-1.74839	-0.735477	-1.36193	-1.03504	-0.992757	-1.02461	0.558281	-0.405488	-1.28994	-0.19091	-0.743307	0.066312	1.07972	0.760673	1.57512	0.808475	-0.0460002	-0.666189	0.847769	0.876038	0.383714	1.89423	0.38249	1.00723
Leaf_Cluster_B (1531)	Seita.4G040100	-1.0468	-1.13132	-0.37876	-0.555595	-0.950594	-0.846689	-0.414461	-1.07757	-0.621573	-1.1997	-1.26907	-1.23278	0.760816	0.58111	2.20497	1.30449	0.419621	1.14578	0.905147	0.73081	0.912332	0.45932	0.810632	0.489886
Leaf_Cluster_B (1531)	Seita.4G053500	-0.825689	-0.974862	-0.891081	-0.683152	-0.683481	-1.03965	-1.09336	-1.1699	-1.17621	-0.843342	-0.939587	-0.796363	1.48526	1.35917	1.37099	1.14319	1.15531	1.27537	0.330018	0.255075	0.436172	0.941669	0.696216	0.668232
Leaf_Cluster_B (1531)	Seita.4G082000	-0.723382	-0.890171	-0.962264	-0.789002	-0.937787	-0.417641	-0.897657	-1.11108	-1.30927	-1.05755	-1.15843	-1.17744	0.887186	1.04631	1.10797	1.2589	1.27217	0.97358	0.919952	0.907781	1.00098	0.952276	0.427794	0.676775
Leaf_Cluster_B (1531)	Seita.4G085500	-1.05914	-1.3459	-1.44309	-1.33021	-0.574565	-0.811702	0.165769	-0.671988	0.577324	1.33834	-0.903	-1.01485	1.30011	0.392349	0.975783	-0.188505	-0.21038	0.912907	1.0098	-0.389038	-0.703899	1.20981	1.62411	1.13996
Leaf_Cluster_B (1531)	Seita.4G088600	-1.08708	-0.997885	-1.19274	-0.744712	-1.15903	-0.607678	-0.333115	-0.611458	-0.987285	-1.04874	-1.06388	-1.11456	1.0888	1.25825	0.779123	0.288643	0.249525	0.887611	0.84475	0.852758	0.376766	1.66203	1.3904	1.26951
Leaf_Cluster_B (1531)	Seita.4G099200	-0.744966	-0.546548	-0.762596	-0.937335	-0.939371	-0.947312	-0.800892	-0.858324	-0.879346	-0.815348	-0.836571	-0.872918	0.665151	0.665393	0.818678	1.53436	1.53918	1.43123	1.34123	1.35802	1.53411	-0.331065	-0.362133	-0.252621
Leaf_Cluster_B (1531)	Seita.4G099300	-1.04795	-1.49024	-1.24236	-0.116453	-0.0835946	-0.962422	-1.01052	-1.33912	-0.93442	-0.966439	-1.23735	-0.627743	1.13549	0.526274	0.540828	0.948688	1.04938	1.00931	0.812696	1.00397	1.12203	0.879109	0.97665	1.05418
Leaf_Cluster_B (1531)	Seita.4G102100	-1.39022	-1.22009	-1.25308	-1.31836	-1.14437	-1.56822	-0.30179	-0.425828	-0.789682	0.00553308	0.243793	0.306965	0.506511	1.06383	0.0916351	-0.245584	-0.23556	0.204221	1.06641	0.916333	0.873316	1.68074	1.34342	1.59007
Leaf_Cluster_B (1531)	Seita.4G138500	-1.00684	-0.994966	-0.729619	-0.768142	-0.826483	-0.80525	-0.913636	-0.906516	-1.00941	-1.10566	-1.10566	-1.10566	0.935932	0.449198	0.988239	0.971457	1.06683	1.28356	1.10648	1.53348	1.35412	0.574016	0.792021	0.222497
Leaf_Cluster_B (1531)	Seita.4G141400	-0.613316	-1.02452	-1.25879	0.00184846	0.480961	0.00702673	-0.583739	-0.73959	-0.569037	-1.97298	-1.73982	-1.71587	0.937227	0.708375	0.847794	0.721845	0.668494	1.17908	1.42842	0.687392	0.756604	0.718439	0.691022	0.38314
Leaf_Cluster_B (1531)	Seita.4G159500	-0.903213	-0.867592	-0.886977	-0.883475	-0.938143	-0.979907	-0.887641	-0.964647	-0.931471	-0.914527	-0.963523	-0.889244	1.67726	1.39715	1.36937	1.35967	1.19569	1.24781	0.610143	0.498882	0.450369	0.564856	0.491611	0.147544
Leaf_Cluster_B (1531)	Seita.4G164300	-0.835553	-0.67349	-1.00868	-0.892724	-1.2036	-0.78311	-0.723673	-0.878004	-1.08816	-1.06737	-1.39187	-0.754735	1.26431	0.353802	1.24664	1.45286	1.29343	0.92973	0.739417	0.98802	0.518128	0.949699	0.823436	0.741482
Leaf_Cluster_B (1531)	Seita.4G169600	-0.518044	-0.759185	-1.12453	-0.256859	-0.0964252	-0.0187252	-1.50481	-0.987588	-1.21711	-1.49897	-1.39123	-1.17008	1.11024	1.1819	0.488227	1.04379	0.670636	1.31304	1.25787	0.746497	0.633783	1.15185	0.692022	0.253694
Leaf_Cluster_B (1531)	Seita.4G176400	-0.615392	-1.35035	-0.896687	-0.686425	-0.0195244	-0.0867071	-1.12089	-0.796967	-1.11896	-1.12778	-1.29173	-1.12221	0.871943	0.283008	0.756696	0.422191	0.0676587	1.46569	1.01982	0.575738	0.285428	1.68345	1.72867	1.07333
Leaf_Cluster_B (1531)	Seita.4G180500	-0.959691	-0.981002	-0.862633	-0.858783	-0.93988	-0.645533	-0.960642	-0.812085	-0.945739	-1.04381	-1.01607	-0.90426	1.1453	1.10203	1.43489	0.721836	0.657439	0.614569	0.200047	0.3874	0.201309	1.6271	1.63897	1.19925
Leaf_Cluster_B (1531)	Seita.4G195200	-0.467131	-0.747073	-1.10749	-0.675717	-0.780581	-0.722453	-0.981787	-0.81776	-1.21494	-1.16994	-1.20475	-1.16704	1.92319	1.59788	0.454044	0.675718	0.813584	0.927367	0.7739	0.844005	0.856172	0.608064	0.878856	0.703886
Leaf_Cluster_B (1531)	Seita.4G199100	-1.04234	-0.867292	-1.05033	0.299716	-0.105059	0.367499	-1.34794	-0.723203	-1.07075	-1.35654	-1.53738	-1.11181	0.783155	0.419725	1.3532	1.30541	1.28388	0.941537	0.125353	0.0912532	-0.207575	1.12857	1.19402	1.12688
Leaf_Cluster_B (1531)	Seita.4G203800	-0.695627	-1.25155	-0.479492	0.313065	0.00601978	0.155855	-1.04661	-0.99104	-0.852109	-1.47816	-2.06743	-1.42011	1.40425	0.92251	0.880933	1.23802	1.0355	0.877142	0.247618	0.792044	0.728711	0.329287	0.903238	0.447927
Leaf_Cluster_B (1531)	Seita.4G229500	-1.53732	-1.6208	-1.19536	-1.05892	-1.09349	-0.921995	0.531812	-0.0963624	0.0883974	-0.833395	-0.303919	-0.72161	1.5438	0.635767	1.24209	-0.393713	-0.528337	0.259761	1.61325	1.34693	1.16447	0.749228	0.595639	0.53407
Leaf_Cluster_B (1531)	Seita.4G242700	-1.08492	-1.13535	-1.12775	-0.766269	-0.536474	-0.875949	-0.827895	-0.960134	-1.01575	-0.866087	-0.982937	-0.663501	1.41971	0.382966	0.910779	0.0911366	0.678863	0.882478	0.579924	0.635398	0.494424	1.47022	1.6879	1.60922
Leaf_Cluster_B (1531)	Seita.4G254100	-0.927666	-1.47171	-1.24285	-0.313606	-0.457922	-0.3451	-1.2825	-1.31359	-0.846503	-1.06739	-0.846776	-0.795952	1.19896	0.817026	0.248559	0.917275	1.2399	1.20172	0.357153	0.580204	0.826474	0.871961	1.2546	1.39772
Leaf_Cluster_B (1531)	Seita.4G255900	-1.12142	-1.19727	-1.24363	-0.0674167	0.706539	-0.162423	-0.75602	-0.741621	-1.46243	-0.550004	-1.04369	-0.962977	0.720027	0.392306	0.821521	1.27208	0.445979	0.753919	1.81359	1.26806	-0.852348	1.7959	0.253936	-0.0826127
Leaf_Cluster_B (1531)	Seita.4G258900	-0.883811	-0.701798	-1.24223	-0.567004	-0.633767	-0.430301	-0.835148	-0.964578	-0.82363	-1.40427	-1.33638	-1.3998	1.20497	1.30376	0.82305	1.27111	1.12658	1.21672	0.751018	0.707946	0.761108	0.727474	0.659851	0.669128
Leaf_Cluster_B (1531)	Seita.4G260000	-1.32617	-0.705731	-1.13094	-0.963188	-0.868329	-0.858826	-0.882038	-1.05274	-1.01776	-0.565929	-0.948115	-0.580963	1.18439	1.55921	0.798629	0.211233	0.225715	1.31601	0.693212	1.25657	0.125193	1.23814	1.27086	1.02157
Leaf_Cluster_B (1531)	Seita.4G260100	-0.725454	0.0594333	-0.313105	-0.732451	-0.722622	-1.08089	-0.926072	-1.05434	-1.25768	-1.06159	-1.58695	-1.31687	1.03519	0.709174	1.63971	1.41096	0.923891	0.874687	0.8359	0.602251	0.229433	1.19439	0.588207	0.674781
Leaf_Cluster_B (1531)	Seita.4G275400	-0.791585	-0.752551	-0.868968	-0.906451	-1.09147	-1.22872	-0.932244	-0.8772	-1.11093	-0.838	-0.621607	-0.452397	1.36986	1.38723	1.36047	0.915947	0.82851	1.87682	-0.278169	0.589421	0.558556	0.147962	1.32329	0.392233
Leaf_Cluster_B (1531)	Seita.4G288300	-0.92453	-0.503778	-0.706051	-1.03858	-0.879725	-1.33795	-0.555247	-0.941184	-0.825853	-1.05814	-0.813457	-1.14769	1.1146	1.59757	1.28814	0.199266	0.0720327	0.26272	0.701269	0.855172	1.018	0.592716	1.46839	1.56232
Leaf_Cluster_B (1531)	Seita.4G289300	-0.936463	-1.37801	-1.09302	-0.295697	-0.318716	-0.382386	-1.01431	-0.998835	-0.733998	-0.988663	-1.66743	-1.26046	1.16276	1.07405	0.795659	0.748237	0.698333	0.821724	0.56492	0.959142	0.696613	1.18544	1.22476	1.13636
Leaf_Cluster_B (1531)	Seita.4G289500	-1.41797	-0.715937	-1.48434	-0.507701	-0.146361	-0.537658	-1.16217	-1.25892	-1.09164	-0.397631	-1.09859	-0.85398	1.27719	1.23286	1.19358	0.492105	0.587716	0.834021	0.139722	0.419384	0.671908	1.29094	1.49283	1.04063
Leaf_Cluster_B (1531)	Seita.5G001000	-0.543705	-1.63756	-0.76104	0.278183	0.0658914	0.249489	-1.06799	-1.13768	-1.53656	-1.03476	-1.74512	-0.752031	0.598434	0.290771	1.40145	1.27946	0.956217	0.751641	-0.151273	0.715833	0.574189	1.05558	1.01551	1.13509
Leaf_Cluster_B (1531)	Seita.5G002000	-0.961234	-1.13741	-1.39527	-0.426455	-0.405027	-0.732005	-0.89431	-0.98269	-0.905307	-0.952498	-1.08048	-0.865987	0.113529	0.187466	0.161728	1.34525	1.30981	1.51536	1.35182	1.17667	1.23582	0.626707	1.0099	0.704602
Leaf_Cluster_B (1531)	Seita.5G003400	-1.36624	-1.25866	-0.819749	-0.906412	-0.558647	-0.834538	-0.371586	-1.02657	-0.200499	-0.59585	-1.09846	-0.225747	0.183139	0.793639	0.871372	-0.645212	0.399225	-0.394523	0.553445	1.31129	1.55884	1.19434	1.3594	2.07801
Leaf_Cluster_B (1531)	Seita.5G011600	-1.29255	-1.34857	-1.49246	-0.0801067	-0.346274	-0.0831447	-0.0764477	-0.197768	-0.0615154	-1.52201	-1.58672	-1.58672	1.66924	0.885436	0.736843	1.16971	0.855134	0.928696	0.929813	0.874871	0.826323	0.0147899	0.22689	0.556517
Leaf_Cluster_B (1531)	Seita.5G011800	-1.14473	-1.25061	-1.04844	-0.472315	-0.117211	-0.523015	-0.688335	-0.756986	-0.661647	-1.42014	-1.5841	-1.34786	0.958961	1.07076	1.17825	1.075	1.08066	1.11946	0.976038	0.893109	0.947859	0.461013	0.696099	0.558199
Leaf_Cluster_B (1531)	Seita.5G012100	-1.22482	-1.10513	-1.45628	-0.355188	-0.148551	-0.585598	-0.382181	-0.274407	-0.290285	-1.47691	-1.4243	-1.37287	1.53387	1.16995	1.03702	1.1891	1.16904	1.17188	0.853566	0.677914	1.02269	-0.054902	0.275382	0.0509976
Leaf_Cluster_B (1531)	Seita.5G026700	-0.864436	-0.877548	-1.21555	-0.789431	-1.09509	0.142949	-0.626952	-0.702961	-0.995371	-1.03321	-0.591944	-1.07423	1.24898	1.04044	1.11481	1.04255	0.388736	1.18194	0.627982	0.0527765	-0.757495	1.57915	1.90781	0.296086
Leaf_Cluster_B (1531)	Seita.5G029600	-0.918261	-1.06305	-1.21874	-0.452321	-0.608216	-0.591199	-0.985775	-0.87253	-1.00757	-1.17525	-1.39621	-1.14757	1.2224	0.832138	0.97541	1.0415	0.638029	0.8767	1.14926	0.889745	0.789715	1.15032	1.01453	0.856951
Leaf_Cluster_B (1531)	Seita.5G040700	-1.01454	-1.05676	-1.254	-0.591647	-0.768352	-0.801495	-0.85124	-1.11558	-1.10652	-0.900093	-1.09108	-0.999661	0.832717	0.642007	0.875749	1.22626	1.17775	1.22528	0.743352	0.948967	0.913805	0.980587	1.09658	0.887906
Leaf_Cluster_B (1531)	Seita.5G040800	-1.02527	-0.987953	-1.00475	-0.626523	-0.899559	-0.670514	-0.941686	-0.81782	-0.915734	-1.04691	-0.987822	-1.00111	0.0865885	-0.253443	1.10066	1.1526	0.900022	1.17818	0.754438	1.21949	1.34249	0.804613	1.46675	1.17325
Leaf_Cluster_B (1531)	Seita.5G040900	-0.928284	-1.21475	-0.595843	-0.186716	-0.265471	-0.864979	-0.740605	-0.847474	-1.10518	-1.05314	-1.23735	-0.975908	1.43534	0.720948	2.13515	1.47392	1.09695	0.892023	0.774019	0.331767	-0.425805	0.909322	0.580963	0.0911078
Leaf_Cluster_B (1531)	Seita.5G042800	-0.498743	-0.894821	-0.540782	-0.32464	-0.385922	-0.306344	-0.863665	-1.25904	-0.56564	-1.77778	-1.62489	-1.33862	1.47897	1.40067	0.567783	0.564424	0.260447	0.496573	0.43967	0.902518	0.797527	0.733	1.48915	1.25015
Leaf_Cluster_B (1531)	Seita.5G069300	-0.588225	-0.578416	-0.506223	-1.07519	-1.04968	-0.804635	-0.86354	-0.877886	-0.906878	-1.11725	-1.23375	-1.12006	0.799846	0.628096	1.26717	1.52804	1.50071	1.34082	1.27104	1.09772	0.922692	0.291156	0.107548	-0.0330942
Leaf_Cluster_B (1531)	Seita.5G069500	-1.16951	-0.729932	-1.1099	0.0345502	0.0283789	0.196866	-1.05553	-0.928675	-1.53386	-0.961924	-1.10075	-1.28493	0.803412	0.895333	1.17251	1.53852	1.78274	1.58483	0.0272138	0.253065	0.174645	0.682387	0.239684	0.460867
Leaf_Cluster_B (1531)	Seita.5G071000	-1.0175	-1.19525	-1.1719	-0.354563	-0.62138	-0.207675	-0.979089	-0.450262	-0.963942	-0.529813	-1.08284	-1.08973	-0.0595789	-0.259325	-0.323618	1.45288	1.86064	0.942998	0.409898	0.729763	0.708929	1.08248	1.56946	1.54943
Leaf_Cluster_B (1531)	Seita.5G073900	-0.597462	-0.412342	-0.234852	-1.61598	-1.22465	-1.42181	-0.656912	-0.43405	-1.78105	-0.09026	-1.04168	-0.841868	1.35877	1.28506	1.13002	0.313115	0.321343	0.785894	0.928893	0.94734	0.242	1.37567	0.847662	0.817148
Leaf_Cluster_B (1531)	Seita.5G087500	-1.17144	-0.723596	-0.791454	0.00567975	-0.416953	-0.0978582	-1.15341	-0.774506	-1.16765	-1.29948	-1.6836	-1.19998	1.34115	1.02434	1.51281	0.848108	0.860025	0.891229	0.677656	0.142719	1.43434	0.674135	0.741632	0.326097
Leaf_Cluster_B (1531)	Seita.5G093000	-0.722636	-0.879709	-0.953817	-0.667311	-0.969258	-0.714247	-1.1502	-0.918126	-0.689344	-1.18994	-1.15176	-1.18994	1.2932	1.53449	1.40596	0.856532	0.767396	1.00869	0.884186	0.576632	0.252093	1.18363	0.990222	0.443264
Leaf_Cluster_B (1531)	Seita.5G096100	-0.983263	-0.796543	-1.04133	-1.41213	-1.06275	-1.2652	0.0775179	-0.0552671	-0.128262	-1.30458	-0.961271	-1.30328	1.22099	1.34054	0.63598	0.914174	1.51599	1.50948	0.595717	0.942006	0.428909	0.0809027	0.799251	0.252411
Leaf_Cluster_B (1531)	Seita.5G098500	-0.572951	-0.661694	-0.91439	-0.596049	-0.556704	-0.0869872	-1.28721	-1.34376	-1.11327	-1.46266	-1.12264	-0.781853	1.45268	0.999479	1.09032	0.376944	0.446572	0.389397	0.672211	0.326551	0.407257	1.67066	1.06388	1.60423
Leaf_Cluster_B (1531)	Seita.5G112900	-0.706737	-0.915653	-0.840708	-1.56262	-1.09453	-1.15977	-0.364274	-0.649232	-1.18057	-0.422984	-1.3526	-0.766336	0.887546	1.18501	0.728291	0.37481	0.407564	0.943567	1.05343	1.10789	0.599506	1.57537	1.15197	1.00106
Leaf_Cluster_B (1531)	Seita.5G116600	-1.09185	-1.03228	-1.04815	-0.49797	-0.35792	-0.54124	-0.931585	-0.90387	-1.05247	-1.34991	-1.41794	-1.14389	1.06527	0.762873	0.916575	1.1992	1.01329	1.09028	0.94955	0.863346	0.604676	0.939072	1.03436	0.93057
Leaf_Cluster_B (1531)	Seita.5G118800	-0.819036	-1.32765	-1.14041	-0.346874	-0.569638	0.453646	-0.873971	-0.99953	-1.32117	-0.99009	-0.857783	-1.17704	0.950885	1.39637	0.755932	0.122632	-0.240444	0.9486	1.14558	1.21573	0.210809	1.7334	1.23336	0.496684
Leaf_Cluster_B (1531)	Seita.5G122100	-0.7906	-1.17691	-0.776234	-1.21904	-1.06185	-1.16111	-0.73212	-0.635746	-0.853624	-0.949307	-1.03804	-1.02783	0.986652	0.965399	1.02471	1.13238	1.16465	1.26657	1.1842	1.04485	0.747925	0.934904	0.735158	0.235004
Leaf_Cluster_B (1531)	Seita.5G129900	-1.20173	-0.803522	-1.13673	-0.241721	-0.196304	0.200904	-0.745654	-0.755414	-1.02164	-0.759245	-1.21256	-1.18666	0.0487512	0.402197	1.37178	1.72593	1.66694	1.61507	1.33849	0.833079	0.857749	-0.273861	-0.32975	-0.196099
Leaf_Cluster_B (1531)	Seita.5G130800	-0.129951	-0.403292	0.143684	-0.505209	-0.605754	-0.586642	-1.47655	-1.31205	-1.2132	-1.38199	-1.79848	-1.10871	1.39277	0.927173	1.29315	0.929328	0.969756	0.865302	0.296793	0.598229	0.406086	0.953577	0.966164	0.779827
Leaf_Cluster_B (1531)	Seita.5G131300	-0.48721	-0.484605	-0.539994	-0.223541	-1.46754	-0.544029	-0.492255	-0.357463	-1.57214	-0.757006	-1.06063	-0.90524	0.769331	0.962982	1.03451	1.49523	1.42363	1.38987	1.02657	0.84411	1.12987	-1.56837	0.285041	0.09888
Leaf_Cluster_B (1531)	Seita.5G137800	-0.726736	-0.973716	-1.01035	-1.46525	-1.00909	-1.31542	-0.0797559	-1.10456	-1.0971	-0.700836	-0.444785	-0.706413	0.805345	1.67079	0.872517	0.0780255	-0.0374555	1.00947	1.08251	1.38512	0.759429	0.796699	1.02212	1.18945
Leaf_Cluster_B (1531)	Seita.5G137900	-0.797662	-0.59065	-0.474307	-1.02021	-0.675442	-0.861069	-0.887587	-1.14379	-1.06023	-0.669072	-1.27484	-0.8838	1.3233	1.34296	1.87736	1.23882	1.14961	1.35787	0.795377	0.819053	0.434617	0.355897	-0.089657	-0.266547
Leaf_Cluster_B (1531)	Seita.5G141600	-0.806272	-1.02091	-1.15792	-0.414413	-0.632372	-0.722493	-0.788029	-0.734729	-0.115748	-1.70124	-1.17651	-1.52015	1.11914	0.824661	1.31742	1.06385	1.08548	1.05739	0.481835	0.621366	0.0989061	1.03371	1.30726	0.779738
Leaf_Cluster_B (1531)	Seita.5G145700	-0.464317	-0.76112	-0.840374	0.113682	-0.232156	0.0195483	-1.06168	-1.07766	-1.26749	-0.795764	-1.26749	-1.02832	0.238965	1.1776	1.80177	1.68053	1.48769	1.68948	0.754346	-0.0704817	-0.147593	0.837694	-0.552212	-0.234646
Leaf_Cluster_B (1531)	Seita.5G148800	-0.571421	-0.357615	-0.926967	-0.67628	-0.667736	-0.953822	-0.868108	-1.07157	-1.11287	-1.08579	-1.15963	-1.1627	1.51655	1.12682	1.13489	0.935134	0.897466	1.32488	1.06052	1.18078	0.076857	1.22201	0.58738	-0.448785
Leaf_Cluster_B (1531)	Seita.5G164400	-0.770565	-1.83367	-1.26115	-1.24697	0.276406	0.290731	0.385698	-0.900118	-0.903847	-0.569643	-0.740089	-1.6217	0.901951	1.18573	1.51416	0.946019	0.960931	1.83926	0.162229	-7.00758e-05	0.751899	0.103466	0.307312	0.222049
Leaf_Cluster_B (1531)	Seita.5G166000	-0.791725	-0.136042	-1.03007	-1.40099	-1.21628	-1.18917	-0.992175	-1.03083	-1.24245	-0.350123	-0.609946	-0.162576	0.703964	0.638444	0.691383	1.60404	1.84258	1.47899	0.780007	1.08023	0.911419	-0.144984	0.254909	0.311386
Leaf_Cluster_B (1531)	Seita.5G178200	-0.916009	-1.26042	-0.989857	-0.483088	-0.450667	-0.623992	-0.727567	-1.16323	-1.39511	-0.579569	-0.884893	-0.543683	0.23312	0.149028	0.935597	1.72783	1.43367	1.44225	1.68169	1.21989	0.283628	1.0074	0.0831481	-0.179147
Leaf_Cluster_B (1531)	Seita.5G196800	-0.502878	-1.50696	-0.781048	-0.977584	-0.826389	-0.705355	-0.42181	-0.793334	-1.13066	-0.737611	-1.29908	-0.619851	0.41356	0.463563	0.98246	1.33907	1.14249	1.42225	1.60258	1.46718	1.32999	0.214124	0.0568665	-0.131576
Leaf_Cluster_B (1531)	Seita.5G200400	-0.624538	-1.356	-0.738898	-0.925056	-0.294091	-0.794677	-0.728051	-1.30156	-1.18889	-1.31209	-0.952619	-1.01674	1.21989	0.452014	0.680211	1.18391	1.26203	1.24634	0.665875	0.713726	0.953206	0.884434	1.16055	0.811029
Leaf_Cluster_B (1531)	Seita.5G201500	-0.952335	-0.691059	-1.38467	-0.444173	-0.367306	-0.705604	-1.24427	-0.900507	-1.02408	-1.13805	-1.00628	-1.19934	1.11042	1.27456	0.673262	1.41066	1.44237	1.33738	0.557636	0.433393	0.545359	0.678375	0.889529	0.704724
Leaf_Cluster_B (1531)	Seita.5G202100	-0.15161	-0.317671	-0.54242	-0.871596	-0.668324	-1.02897	-0.945785	-0.665145	-1.22749	-1.50191	-1.5749	-0.98128	1.68369	1.21721	0.938891	1.01023	0.681386	0.879291	1.04954	1.23932	1.12294	0.644914	0.0486258	-0.0389421
Leaf_Cluster_B (1531)	Seita.5G218000	-0.657946	-1.34976	-1.55359	0.152072	-0.222385	0.184356	-1.54672	-1.09013	-1.29657	-0.841366	-1.10134	-0.74366	0.016631	0.727587	0.451833	0.751047	0.864509	1.04212	0.723799	0.838725	0.556388	1.75827	1.18929	1.14684
Leaf_Cluster_B (1531)	Seita.5G231900	-0.792759	-1.63146	-1.35297	-0.52301	-0.627642	-0.0193619	-0.754605	-1.60494	-1.42517	-0.095952	-0.725894	-0.0263489	0.990279	-0.182394	0.925313	1.60009	0.990357	1.09086	-0.277736	0.544472	0.551779	0.860403	0.803498	1.68319
Leaf_Cluster_B (1531)	Seita.5G235900	-1.07398	-1.66173	-1.06748	-0.455693	-0.444427	-0.244252	0.0340349	-0.747775	-0.00711553	-0.73986	-0.812583	-1.26675	1.62236	0.77886	1.26276	2.07432	0.782011	1.49321	0.957343	0.25063	0.429476	0.114879	-0.377446	-0.900801
Leaf_Cluster_B (1531)	Seita.5G239700	-0.848423	-0.597858	-0.270354	-0.965954	-1.40798	-0.742564	-0.815579	-0.956456	-1.32388	-0.635289	-1.12921	-0.334975	0.292013	0.672201	1.09082	1.66185	1.87589	1.40068	1.01277	1.25134	0.833547	-0.0541638	0.00790403	-0.0163335
Leaf_Cluster_B (1531)	Seita.5G240100	-0.421778	-0.546403	-1.20123	-0.501011	-0.203262	-0.765186	-0.471164	-0.695713	-1.70861	-0.970018	-1.2546	-1.04924	1.12884	0.92522	0.66628	1.84934	1.61359	1.51533	0.654442	0.763884	0.91836	0.268452	-0.197849	-0.317671
Leaf_Cluster_B (1531)	Seita.5G242200	-0.24381	-0.477322	-0.543085	-0.527515	-0.392447	-0.390599	-1.30084	-1.15017	-1.26636	-1.69988	-1.44835	-1.39667	1.35079	0.927332	0.633314	1.11172	1.00945	0.938869	0.893998	0.984564	0.925228	0.728017	0.737647	0.596116
Leaf_Cluster_B (1531)	Seita.5G243000	-0.463889	-0.899004	-0.30875	-0.868362	-1.00819	-0.964851	-0.73788	-0.752008	-1.08978	-1.08978	-0.654764	-0.846476	1.18121	0.557088	0.417666	1.31642	1.35246	1.69164	1.35509	1.42729	1.40172	-0.394373	-0.140873	-0.481605
Leaf_Cluster_B (1531)	Seita.5G246700	-0.55445	-0.790758	-0.85519	-0.400806	-0.201935	-0.298793	-1.0999	-1.3222	-0.973261	-1.55623	-1.57253	-1.31047	1.09318	1.10448	0.516778	0.808436	0.690365	1.0098	0.724258	0.670358	0.906366	1.06422	1.10028	1.24799
Leaf_Cluster_B (1531)	Seita.5G247700	-0.756678	-1.13095	-1.28528	-0.461212	-0.522303	-0.557214	-0.722889	-0.879066	-0.949526	-0.944354	-1.08072	-1.0024	0.677118	0.525036	1.0891	1.99026	1.7817	1.84959	0.342041	0.412497	0.408462	0.316342	0.414205	0.486252
Leaf_Cluster_B (1531)	Seita.5G251200	-0.977615	-0.973423	-1.02108	-0.619718	-0.585311	-0.735449	-1.04789	-1.0077	-1.00641	-1.1177	-1.3289	-1.09682	1.13864	0.973487	0.80914	1.14542	1.17677	1.28158	0.752864	0.726239	0.877547	0.825054	1.00177	0.809502
Leaf_Cluster_B (1531)	Seita.5G265000	-0.780348	-0.813101	-0.713679	-0.161788	-0.184171	-0.287291	-0.846452	-0.818656	-0.784296	-0.908388	-0.908388	-0.908388	0.687571	0.685817	1.42025	1.45452	1.69273	1.34182	0.855508	1.32362	1.37827	-0.908388	-0.908388	-0.908388
Leaf_Cluster_B (1531)	Seita.5G265500	-0.874931	-1.53864	-1.15136	-0.721119	-0.855724	-0.000760354	-0.431069	-0.201988	-1.44279	-0.359937	-0.645386	-1.11542	0.645838	1.60039	0.599064	-0.434899	-0.423153	0.70505	0.933254	0.868157	0.341399	1.89655	1.65773	0.949735
Leaf_Cluster_B (1531)	Seita.5G271900	-0.791917	-0.759463	-0.830519	-0.778824	-0.7602	-0.834977	-0.773123	-0.762463	-0.671584	-0.988045	-0.915118	-0.916558	0.136269	-0.405453	0.360185	2.13189	1.6389	1.45745	0.84455	1.29239	1.60333	0.551221	0.0771754	0.0948828
Leaf_Cluster_B (1531)	Seita.5G279800	-0.633943	-1.09224	-1.45093	-0.788167	-1.45093	-0.810606	0.946413	0.953442	0.945223	-1.45093	-1.40025	-1.1772	0.552005	0.783645	0.635552	0.608558	0.381767	0.607072	1.45653	1.28197	1.32851	-0.101087	0.0131881	-0.137588
Leaf_Cluster_B (1531)	Seita.5G285700	-0.705641	-0.97058	-1.04203	-0.805118	-0.960791	-0.624016	-0.474602	-0.207987	-0.535436	-1.04203	-0.960023	-1.04203	1.56001	1.02469	0.849164	-0.172016	-0.498619	0.633848	1.32776	2.4047	1.08173	0.0274028	1.12422	0.00739506
Leaf_Cluster_B (1531)	Seita.5G287800	-0.911703	-0.911703	-0.911703	-0.884199	-0.911703	-0.911703	-0.911703	-0.911703	-0.848773	-0.911703	-0.911703	-0.850669	0.853131	0.787934	1.60792	1.82358	1.83563	1.16226	0.350061	0.373945	0.366173	0.41981	0.531995	0.676522
Leaf_Cluster_B (1531)	Seita.5G298300	-1.05888	-0.946177	-1.13225	-0.787684	-0.887874	-0.956678	-0.912906	-0.926504	-0.827361	-1.05383	-1.12344	-0.960903	0.808333	0.631659	0.740635	1.30343	1.32753	1.10182	0.815839	0.924242	0.865586	1.10412	1.1118	0.839502
Leaf_Cluster_B (1531)	Seita.5G301800	-0.594242	-1.42517	-1.35636	0.244937	0.191049	-0.057774	-0.68114	-1.07809	-0.775642	-1.41108	-1.85006	-1.19518	0.535671	0.302735	0.428648	0.834881	0.75227	0.564968	0.894473	0.903383	0.978667	1.14504	1.51187	1.13613
Leaf_Cluster_B (1531)	Seita.5G309000	-1.18451	-1.28902	-0.677291	-0.0747997	-0.634544	-0.492425	-1.084	-0.819051	-0.386475	-1.21396	-1.79769	-1.24879	0.942846	0.536922	0.622463	1.29211	1.13097	1.059	0.584955	0.690935	0.886479	1.04383	1.10892	1.00313
Leaf_Cluster_B (1531)	Seita.5G312700	-1.10229	-1.10527	-1.31056	-0.620591	-0.660262	-0.765342	-1.0449	-0.988425	-0.810874	-0.900905	-0.824036	-0.779315	1.32578	0.912401	1.30703	1.28445	1.36208	0.809409	0.130958	0.107723	0.184687	1.16061	1.30003	1.02761
Leaf_Cluster_B (1531)	Seita.5G315900	-1.06537	-1.49581	-0.705009	-1.46345	-0.614758	-0.153755	-0.972775	-0.57435	-0.935097	-0.690581	-1.09746	-0.993882	0.814541	1.05655	1.30526	1.1741	1.0364	0.619734	-0.114463	1.15243	0.61579	0.616355	0.883671	1.60194
Leaf_Cluster_B (1531)	Seita.5G319100	-0.797262	-1.8272	-0.643717	-1.83336	-0.610874	-0.757553	0.43937	-0.144597	-1.03032	-0.129433	-0.825168	-0.657891	0.816969	1.2847	0.97037	-0.495145	-0.51826	0.504678	0.826951	0.906919	0.228007	1.73199	1.40703	1.1538
Leaf_Cluster_B (1531)	Seita.5G326800	-1.09499	-0.33661	0.257627	-0.989964	-0.452459	-1.10587	-1.08347	-1.27906	-1.06176	-1.0625	-1.34279	-0.87796	1.40354	0.677941	1.39351	0.993661	0.253419	0.737769	0.979648	1.28906	1.60409	0.449108	0.331844	0.316211
Leaf_Cluster_B (1531)	Seita.5G334800	-1.22699	-0.55859	-1.48844	-0.147904	-0.238837	-0.72561	-0.935604	-0.876299	-0.616798	-1.10921	-1.47754	-1.36333	1.24352	1.50453	0.87537	0.60865	0.60252	1.04084	0.630776	0.24502	0.759252	0.819656	1.18698	1.24803
Leaf_Cluster_B (1531)	Seita.5G338200	-0.893181	-0.844484	-1.05858	-0.815382	-0.27492	-0.50943	-0.443597	-0.89537	-0.801275	-0.988613	-1.18336	-1.1464	1.65699	1.75932	0.170411	-0.276181	-0.0370736	1.26456	1.33039	1.8895	0.494682	0.364209	0.673061	0.564729
Leaf_Cluster_B (1531)	Seita.5G346200	-0.115884	-1.58845	-0.886166	0.0143631	0.766666	-0.281391	-1.40105	-0.575985	-1.6007	-1.36061	-1.60194	-0.493736	1.35759	0.621781	0.830092	1.07912	0.502659	0.799399	1.43712	1.27416	-0.0066925	0.867869	0.252976	0.1088
Leaf_Cluster_B (1531)	Seita.5G346500	-0.696394	-0.726031	-0.607235	-0.693434	-0.745826	-0.836419	-1.08758	-1.08868	-1.06352	-1.27035	-1.39422	-1.09427	1.24476	1.09137	1.10962	1.23742	1.22846	1.1361	0.923683	0.915342	0.895665	0.671477	0.525151	0.324903
Leaf_Cluster_B (1531)	Seita.5G361200	-0.306272	-0.366801	-0.523827	-0.793017	-1.07113	-0.574285	-0.920869	-0.987055	-1.22342	-1.04775	-1.35544	-1.09094	0.946172	0.612793	1.10566	1.64456	0.771289	1.54577	0.943465	1.14906	0.976265	1.17696	-0.426902	-0.184279
Leaf_Cluster_B (1531)	Seita.5G366400	-0.873601	-0.428196	-0.864237	-0.853096	-0.269531	0.0199414	-1.23463	-1.12004	-0.199425	-1.23463	-1.22313	-1.15154	1.07785	1.35374	0.93521	1.35636	1.14889	1.95076	1.07422	0.204902	0.0507975	0.136039	0.871482	-0.728133
Leaf_Cluster_B (1531)	Seita.5G370300	-0.759935	-0.780213	-0.893025	-0.566402	-0.867323	-0.640673	-0.278056	-0.522676	-0.344009	-0.841953	-0.622375	-0.653592	1.21841	0.797679	0.463515	1.78612	2.42208	1.87636	0.343577	0.209369	0.868921	-0.849389	-0.849784	-0.516629
Leaf_Cluster_B (1531)	Seita.5G374600	-0.940685	-1.06488	-1.67821	-0.0833806	-0.370638	-0.395491	-0.946769	-0.778673	-0.641373	-1.31041	-1.05131	-1.15716	1.44759	1.26576	0.183069	0.911592	1.10909	0.962751	-0.139246	0.54665	0.469213	1.26116	1.36979	1.03157
Leaf_Cluster_B (1531)	Seita.5G376100	-0.191257	0.0682591	0.0261449	-0.92998	-1.11153	-1.09613	-1.12891	-1.06031	-1.08117	-1.23813	-1.19848	-1.30958	0.674187	0.611687	0.767476	1.39388	1.35451	1.4094	1.16838	1.12382	1.2043	0.355672	0.0895258	0.0982392
Leaf_Cluster_B (1531)	Seita.5G377700	-0.808732	-1.11857	-0.966675	-1.34914	-0.941414	-0.885311	-0.295628	0.158607	-1.12996	-0.667283	-1.15256	-1.19079	0.473292	0.929313	0.836139	0.0549334	-0.0721527	0.652077	1.2268	1.19817	0.648258	1.5157	1.59941	1.28551
Leaf_Cluster_B (1531)	Seita.5G377800	-0.909305	-0.976611	-0.934777	-0.962332	-0.961889	-0.948289	-0.857589	-0.905175	-0.949237	-0.976611	-0.960358	-0.92443	0.100284	0.663042	1.25014	0.527671	0.520614	0.884346	1.29645	1.1878	0.921976	1.27085	1.40495	1.23848
Leaf_Cluster_B (1531)	Seita.5G378200	-0.962376	-0.985277	-0.97952	-0.982477	-1.01512	-1.01512	-0.854215	-0.958843	-0.962718	-0.938482	-0.978276	-0.958563	1.06197	1.36907	1.08186	0.577633	0.585787	0.967694	1.03615	1.0052	0.764407	1.15954	1.09745	0.884233
Leaf_Cluster_B (1531)	Seita.5G378700	-0.937938	-1.20057	-0.694812	-1.14758	-0.51456	-0.751031	-0.521909	-0.739257	-0.953494	-1.05733	-1.21803	-1.01349	0.900082	0.760089	1.8325	0.723735	0.326303	0.89325	1.67624	0.755938	0.284313	1.5742	0.678581	0.344766
Leaf_Cluster_B (1531)	Seita.5G379400	-0.132726	-0.373751	-0.213325	-0.253221	-0.334372	-0.147993	-1.22486	-1.10585	-1.09316	-1.82682	-1.78848	-1.73287	1.19248	1.12278	0.970231	0.719217	0.630041	0.836486	0.692441	0.750868	0.547444	0.933949	0.993382	0.838103
Leaf_Cluster_B (1531)	Seita.5G381100	-1.09945	-1.20972	-1.19775	-1.07814	-0.816478	-0.79543	-0.662814	-0.881358	-0.845272	-1.01022	-0.853597	-1.14795	0.704511	0.77364	0.93989	1.12796	1.08473	1.14638	1.09091	0.910681	1.03073	0.880864	1.03975	0.868149
Leaf_Cluster_B (1531)	Seita.5G381700	-0.841611	-0.419789	-1.1286	-0.692822	-0.819309	-0.634112	-0.81291	-0.853925	-1.06867	-0.819614	-0.962138	-0.889414	1.45076	0.65994	1.04383	1.47134	1.4012	0.811735	-0.640239	-0.219538	-0.0645067	1.25479	1.57072	1.20287
Leaf_Cluster_B (1531)	Seita.5G382400	-0.450769	-1.07287	-1.15948	-0.503282	-0.572188	-0.809196	-1.13914	-0.956834	-0.972014	-0.938137	-1.30848	-0.836592	1.00051	0.609599	1.74723	1.00727	1.05776	1.06045	0.0186866	0.328565	0.194614	1.42987	1.43041	0.834011
Leaf_Cluster_B (1531)	Seita.5G383100	-0.583888	-1.00142	-0.458512	-0.631111	-0.797786	-0.710558	-1.31112	-0.870121	-1.86211	-0.536283	-0.896274	-0.175509	1.20392	0.860106	0.500249	1.54919	2.0415	1.59258	0.65403	0.788724	0.358988	0.0230528	0.335971	-0.0736237
Leaf_Cluster_B (1531)	Seita.5G385700	-1.05647	-1.2829	-0.999415	-0.608591	-0.416721	-0.503033	-0.439897	-0.555962	-0.628322	-1.3807	-1.51153	-1.22751	0.708961	0.620384	1.08086	1.4363	1.53846	1.50233	1.02663	0.916296	0.916875	0.380601	0.474466	0.00886979
Leaf_Cluster_B (1531)	Seita.5G393800	-0.97497	-1.12439	-0.987927	-0.562572	-0.589349	-0.65355	-0.969346	-1.01745	-1.0561	-1.13394	-1.2567	-1.05858	1.3158	1.40106	0.912528	1.11648	1.04081	1.07462	0.700062	0.581475	0.803048	0.931357	1.03107	0.476558
Leaf_Cluster_B (1531)	Seita.5G395400	-0.89054	-0.925495	-0.933404	-0.755171	-0.437552	-0.509125	-1.14648	-1.19234	-0.914805	-1.31878	-1.10739	-0.970344	0.795113	0.911699	1.15613	1.55209	1.3408	1.3142	0.417174	0.25523	0.565561	0.715548	0.953763	1.12412
Leaf_Cluster_B (1531)	Seita.5G403400	-1.8842	-0.950217	-1.69368	-1.59806	-1.31646	-2.17794	0.327748	0.302927	0.245259	0.193541	0.0967978	0.0315053	0.364718	0.490137	0.686831	0.743085	0.517256	0.743094	0.76204	0.686939	0.600379	1.07713	0.78216	0.96901
Leaf_Cluster_B (1531)	Seita.5G414600	-0.402777	-1.1187	-1.68019	-0.0910434	-0.00390466	-0.135576	-0.523098	-0.662434	-0.416478	-1.57067	-1.32449	-2.01731	1.2175	1.35598	0.400871	0.260356	0.364304	0.67002	0.867726	1.01338	0.939634	0.789248	0.982008	1.08566
Leaf_Cluster_B (1531)	Seita.5G448100	-0.741142	-1.00342	-1.05837	-1.02344	-0.993205	-0.570301	-0.616604	-0.468888	-1.00852	-1.04112	-1.34874	-1.31231	1.1485	0.962282	1.24888	1.16478	1.14338	1.20241	1.05173	0.977675	0.887959	0.596898	0.774724	0.0268516
Leaf_Cluster_B (1531)	Seita.5G448500	-0.642067	-0.2305	-0.96703	0.32695	0.0540659	0.688864	-0.054297	-0.104978	-0.624189	-1.12952	-1.75235	-1.35945	1.04448	0.781271	0.166481	1.98171	1.60857	1.57259	0.363092	0.171802	0.787092	-0.380661	-1.40092	-0.901001
Leaf_Cluster_B (1531)	Seita.5G448900	-1.15264	-1.26974	-1.43209	0.0281022	-0.369371	-0.38807	-0.955196	-1.21877	-1.38425	-0.759318	-1.17659	-0.594066	0.837609	0.496103	0.981067	1.57364	1.51274	1.2428	0.515647	0.775362	0.895342	0.835503	0.492813	0.513358
Leaf_Cluster_B (1531)	Seita.5G450200	-1.00521	-0.445878	-0.594351	-0.104448	-0.588245	-0.113367	-0.906685	-0.889914	-1.00539	-0.600492	-1.10777	-0.783937	1.0805	0.940623	0.837875	1.59244	1.8153	2.04709	-0.664048	-0.801793	-0.651612	0.0391564	1.21024	0.699898
Leaf_Cluster_B (1531)	Seita.5G450300	-1.57517	-1.6105	-0.880539	-0.710448	-0.992047	-0.834659	-0.142074	-0.241624	-0.415577	-1.16725	-1.1317	-1.18667	1.26628	1.06703	1.12615	0.811825	0.885201	0.950397	0.370791	0.731481	0.549484	1.23971	0.881015	1.0089
Leaf_Cluster_B (1531)	Seita.5G452100	-1.3851	-1.3851	-1.10975	-0.179571	-0.0497653	0.0744597	-0.651115	-0.788325	-1.03837	-1.0799	-1.28847	-1.26639	1.61904	0.488148	0.263255	1.14336	0.273132	0.988269	0.497503	0.880311	1.2155	1.70584	0.356767	0.716258
Leaf_Cluster_B (1531)	Seita.5G461700	-1.13796	-0.40314	-0.474589	-0.390192	0.0864641	-0.983608	-1.56356	-0.835557	-0.847913	-1.19118	-1.64701	-1.16303	1.08666	1.17868	0.482202	1.17332	0.203636	1.05243	0.806823	0.988482	0.344508	1.17595	1.39478	0.663799
Leaf_Cluster_B (1531)	Seita.6G005300	-0.700811	-0.763836	-0.838969	-0.858859	-0.654589	-0.855445	-1.06212	-0.876061	-1.14905	-1.14478	-1.14282	-1.21466	1.19012	0.916574	0.843763	1.32412	1.17042	1.33804	1.07254	1.00698	1.14519	0.621369	0.505687	0.127185
Leaf_Cluster_B (1531)	Seita.6G023700	-0.26716	-0.37749	-0.789591	-0.611974	0.337584	-0.897152	-1.36562	-1.12823	-1.84099	-0.318205	-1.01021	-0.450582	0.490586	0.259194	1.03418	1.30928	0.87765	0.833663	1.9417	1.43443	-0.474874	1.492	-0.0561452	-0.422044
Leaf_Cluster_B (1531)	Seita.6G023800	-1.29593	-0.736933	-1.16322	-0.427732	0.549493	-0.366955	-1.00245	-0.960197	-1.22255	0.0831736	-1.14931	-0.270936	0.468403	0.185415	0.908685	1.26379	0.705141	0.431688	1.99405	1.43763	-1.01705	1.81432	0.222342	-0.450888
Leaf_Cluster_B (1531)	Seita.6G028000	-0.650305	-0.76628	-0.89098	-0.854114	-0.828599	-0.729433	-0.990522	-0.905017	-1.06828	-1.18175	-1.14076	-1.14207	1.28121	0.780141	1.23677	1.24102	0.985526	1.23194	0.992526	0.831448	-0.122375	1.17861	1.1251	0.386208
Leaf_Cluster_B (1531)	Seita.6G036000	-1.41799	-0.859071	-1.7197	0.0329043	0.00656031	0.289593	-0.854153	-2.00635	-2.04193	1.10091	0.64898	0.0250712	0.203887	1.23455	0.794775	0.473789	1.57543	0.854868	-0.300821	0.620443	0.0768949	0.433621	0.458775	0.368971
Leaf_Cluster_B (1531)	Seita.6G042800	-0.678929	-0.803862	-0.966858	-1.04617	-0.761042	-0.863259	0.408062	0.686295	1.2224	-1.03844	-0.988893	-0.990421	0.490113	0.41898	0.368628	-0.235533	-0.876658	-0.108552	2.05033	1.94108	1.87087	-0.325492	-0.321739	0.54908
Leaf_Cluster_B (1531)	Seita.6G047000	-0.951193	-1.60985	-1.65303	0.425154	0.450775	0.00273678	-1.04286	-0.903479	-1.51118	-0.834198	-1.27812	0.081679	0.386946	-0.040571	-0.158516	0.903035	1.20651	0.656159	0.00692915	1.10376	1.28598	1.39255	0.972506	1.10828
Leaf_Cluster_B (1531)	Seita.6G075900	-0.603637	-0.889539	-1.25752	-0.346058	-0.445597	-1.1167	-1.01588	-0.440727	-1.25752	-0.559346	-1.02388	-0.992801	0.77545	1.18131	1.04524	0.483343	0.110903	0.839027	0.957116	0.0322101	-0.246286	2.35612	1.3796	1.03518
Leaf_Cluster_B (1531)	Seita.6G092300	-0.999854	-0.995221	-1.2004	-0.322638	-0.684324	-0.74181	-0.999365	-0.881519	-0.982538	-1.36605	-1.36032	-0.822638	0.969004	1.00039	0.831492	1.31232	1.29016	1.18782	0.80944	0.903275	0.955477	0.803708	0.73707	0.556529
Leaf_Cluster_B (1531)	Seita.6G108000	-0.221632	-0.41682	-0.174739	0.715985	0.823998	0.626747	-1.51403	-1.22954	-1.56228	-1.68664	-1.32455	-1.32043	1.16935	0.809892	0.729623	1.05025	1.03921	1.59798	0.829883	0.671795	0.0090732	-0.11539	-0.243622	-0.264117
Leaf_Cluster_B (1531)	Seita.6G110600	-0.0625655	-0.66604	-0.252851	-0.805066	-0.805066	-0.805066	-0.805066	-0.686517	-0.67481	-0.640678	-0.778588	-0.77367	0.542808	0.617538	0.811928	-0.805066	-0.805066	-0.805066	0.0968483	1.12133	1.0679	2.0533	1.88906	1.97047
Leaf_Cluster_B (1531)	Seita.6G122600	-0.384264	-0.27833	-0.0141197	-0.0487757	-0.146937	-0.218	-0.900764	-0.986887	-0.759665	-1.36249	-1.41218	-1.39251	1.31398	1.0356	0.721333	1.60843	1.65577	1.81874	0.647878	0.636723	0.554389	-0.770857	-0.633837	-0.683237
Leaf_Cluster_B (1531)	Seita.6G124200	-0.673095	-0.521201	-0.738282	-0.787945	-0.392911	-0.582812	-1.41834	-1.10938	-1.28423	-0.693291	-1.69414	-1.05315	1.1919	0.962639	1.42742	1.04307	1.26258	1.24259	0.468011	0.345867	0.698069	0.704226	0.647692	0.954705
Leaf_Cluster_B (1531)	Seita.6G128800	-0.909845	-0.787724	-0.820987	-1.35375	-0.910386	-1.3476	0.197328	-0.887852	-1.2026	-0.843128	-1.17378	-0.893911	0.780443	0.729133	0.850628	1.08546	1.02347	1.46613	1.07928	1.17005	1.34307	0.432998	0.500033	0.473529
Leaf_Cluster_B (1531)	Seita.6G138300	-0.901434	-0.481218	-0.44852	-1.05466	-1.213	-1.01408	0.475245	-0.98271	-0.934607	-0.534042	-1.0523	-0.379727	1.16548	0.484145	1.82312	1.86194	0.733907	0.765183	1.62976	0.996502	-0.717943	0.629592	-0.19011	-0.660523
Leaf_Cluster_B (1531)	Seita.6G141600	-0.827947	-0.929328	-0.263209	-0.649769	-0.545825	-0.937721	-1.24048	-1.13878	-1.37088	-0.90504	-1.43609	-0.917022	0.78188	0.632897	1.48987	1.0418	0.729087	0.89869	1.25792	1.12162	0.843015	1.18888	0.71506	0.46136
Leaf_Cluster_B (1531)	Seita.6G150400	-0.52016	-1.76776	-1.76776	0.547123	-0.237094	0.579761	-0.901254	-1.76776	-1.30163	0.128971	0.134789	0.0743267	1.30064	0.30484	0.447321	0.721699	1.00432	0.757314	0.961085	-1.35051	-0.282663	0.868888	0.637376	1.42815
Leaf_Cluster_B (1531)	Seita.6G152500	-0.597683	-0.997948	-0.922773	-0.420439	-0.474436	-0.43082	-1.12599	-0.845831	-1.06999	-1.33624	-1.37962	-1.17216	0.855646	0.784031	0.973222	1.54558	1.33074	1.6339	1.12021	0.670866	0.538612	0.873254	0.357526	0.0903219
Leaf_Cluster_B (1531)	Seita.6G161800	-1.07028	-1.10485	-1.19806	-0.989597	-0.848805	-1.16672	-0.540057	-0.92225	-0.503295	-1.18123	-0.781814	-0.994938	0.558348	0.430834	0.837936	1.25265	1.35026	1.40731	0.854169	1.05736	0.99829	0.53192	1.00696	1.01587
Leaf_Cluster_B (1531)	Seita.6G163200	-0.545922	-0.838667	-0.670582	-0.897757	-0.805415	-0.422403	-0.558938	-0.54458	-0.77316	-1.74028	-1.42381	-1.77426	0.64407	0.674527	0.909408	1.09357	1.05532	1.02245	1.19794	1.02954	0.994716	0.971569	0.84497	0.557697
Leaf_Cluster_B (1531)	Seita.6G193100	-0.99286	-1.35116	-1.08457	-0.807059	-0.909242	-0.809676	-0.823165	-1.08388	-0.715383	-0.890943	-1.03104	-0.748852	1.07783	1.25654	1.70173	0.613082	0.430616	0.675134	0.624523	0.564225	0.879673	1.08802	1.01372	1.32274
Leaf_Cluster_B (1531)	Seita.6G202700	-0.639142	-1.01815	-0.864935	-0.570602	-0.736344	-0.486748	-1.04959	-0.94571	-0.861902	-0.770317	-0.975269	-0.875072	1.41277	1.00458	1.221	0.680938	0.383546	1.31765	1.15026	0.795777	-0.593286	1.75851	1.37745	-0.715432
Leaf_Cluster_B (1531)	Seita.6G208200	-0.918985	-0.467143	0.231339	-1.26613	-1.40164	-1.23978	0.410972	-0.579377	-1.04524	-1.21536	-1.3809	-1.40055	1.32512	0.620987	1.34484	1.0926	0.858727	0.667564	0.863541	0.961995	0.896209	0.712644	0.683472	0.245089
Leaf_Cluster_B (1531)	Seita.6G214400	-0.562801	-0.917164	-1.35469	-0.155828	-0.342766	-0.643771	-0.997949	-0.748195	-0.893186	-1.28848	-1.19573	-1.65274	1.38327	1.48132	0.53479	1.24288	1.1145	1.31556	0.590153	0.493364	0.558416	0.697589	0.477745	0.86371
Leaf_Cluster_B (1531)	Seita.6G224100	-1.04732	-1.33356	-1.06459	-0.846928	-0.862789	-0.642797	-0.584007	-0.972061	-0.652929	-0.798942	-0.925785	-1.13214	0.206134	0.137297	0.585744	1.33377	1.42389	1.50697	1.30329	1.30487	1.30689	0.620073	0.629031	0.505888
Leaf_Cluster_B (1531)	Seita.6G231200	-0.989707	-1.20191	-1.15262	-0.575619	-0.0994978	-0.681613	-0.964197	-1.04076	-0.921608	-0.866432	-0.691964	-0.713415	0.887879	0.344352	-0.0457297	1.72854	1.64944	0.795529	-0.450533	0.688293	0.614175	1.19589	0.537743	1.95376
Leaf_Cluster_B (1531)	Seita.6G238100	-0.426768	-1.08873	-0.219565	-1.33368	-1.2994	-1.28948	0.553487	0.840272	1.01159	-0.451979	-0.634281	-0.52569	0.703836	0.731766	0.626899	-1.17	-1.26458	-1.21228	1.18443	1.45326	1.4754	0.790057	1.05922	0.486201
Leaf_Cluster_B (1531)	Seita.6G239200	-0.91867	-1.30752	-2.63041	-1.59579	-1.22574	-0.917713	0.0694479	-0.0521756	0.26301	0.0701782	-0.165913	0.305337	1.0029	0.736617	0.786175	-0.438039	0.179	0.162931	1.28647	0.844684	1.1958	0.461556	1.27812	0.609745
Leaf_Cluster_B (1531)	Seita.7G015900	-0.928243	-1.49572	-1.69085	-0.348814	0.210095	-0.591195	-1.06081	-1.07087	-1.12144	-1.02603	-0.748821	-0.286073	0.670748	1.20388	0.46688	1.01745	1.58243	0.707081	0.392682	0.180341	0.163376	0.919048	1.50575	1.34909
Leaf_Cluster_B (1531)	Seita.7G021400	-0.98399	-0.972955	-0.921724	-0.963705	-0.947637	-0.780579	-0.987579	-0.997614	-0.997614	-0.997614	-0.958563	-0.997614	1.00317	0.895929	1.36812	1.34581	1.20724	1.19947	0.787849	0.990518	0.939528	0.631413	0.620684	0.517444
Leaf_Cluster_B (1531)	Seita.7G033300	-0.691721	-1.46982	-0.9421	0.253342	0.090327	-0.0220022	-1.28889	-1.07969	-1.12156	-1.19849	-1.43326	-1.04257	0.402942	-0.120874	0.478396	1.37091	1.31494	1.35889	0.598822	1.16462	1.26611	0.656274	0.914332	0.541079
Leaf_Cluster_B (1531)	Seita.7G044300	-1.02656	-0.764919	-1.79134	-0.250723	0.0554013	-0.4473	-0.861759	-0.746593	-0.709172	-1.39252	-1.19277	-1.31952	1.2973	1.35864	0.303107	0.828453	1.1348	1.40935	1.0724	1.09134	0.741626	0.488295	0.42707	0.295399
Leaf_Cluster_B (1531)	Seita.7G056700	-0.648635	-0.714419	-0.751654	1.27001	1.27336	1.18465	-0.797441	-0.797441	-0.797441	-0.797441	-0.797441	-0.797441	0.690303	0.380633	0.325842	1.88653	1.70169	1.823	-0.682934	-0.362081	-0.199333	-0.797441	-0.797441	-0.797441
Leaf_Cluster_B (1531)	Seita.7G074700	-0.701551	-1.06552	-0.818679	-1.03679	-0.972328	-0.661068	-1.19055	-1.25198	-1.03282	-0.734057	-0.776281	-1.00257	0.502732	0.691246	1.19072	0.739015	0.49821	1.17712	0.978849	1.12294	0.463224	1.51428	1.49355	0.872307
Leaf_Cluster_B (1531)	Seita.7G076400	-0.909341	-0.980696	-0.714162	0.00856316	-0.169432	0.163537	-1.50206	-1.32838	-1.05246	-1.13473	-1.373	-0.685811	1.01832	0.910574	1.12142	-0.0016731	0.158136	0.160516	0.409537	0.682705	0.33788	1.59437	1.71488	1.57129
Leaf_Cluster_B (1531)	Seita.7G082800	-1.52418	-1.50264	-1.77169	-1.29894	-0.958004	-1.10085	-0.578801	-0.790808	-0.710561	0.436133	0.801651	-0.156831	-0.156219	0.566776	1.39872	0.688729	0.69002	0.475609	0.443905	1.15446	0.958737	0.503083	1.177	1.25469
Leaf_Cluster_B (1531)	Seita.7G085700	-0.706798	-0.508546	0.0011924	-1.16077	-1.27657	-0.598884	-0.956377	-0.466376	-0.563738	-1.13766	-1.31319	-1.0424	1.10709	1.70128	1.79941	0.438973	0.455199	0.329427	1.13947	1.70547	1.01691	-0.152543	0.412658	-0.223221
Leaf_Cluster_B (1531)	Seita.7G089000	-1.01951	-1.29715	-1.24863	-0.536231	-0.583793	-0.650681	-0.696449	-0.774457	-0.573107	-1.24912	-1.54918	-1.12339	0.93277	0.845138	1.06884	0.465461	0.795219	0.968406	1.18237	1.06826	0.954159	0.909689	1.133	0.978381
Leaf_Cluster_B (1531)	Seita.7G097100	-0.477282	-0.33121	-0.818905	-1.25281	-1.26705	-1.24834	-0.94401	-0.909512	-0.833253	-0.940606	-1.04797	-0.939413	1.09984	0.900333	0.852188	1.38039	1.34224	1.42131	1.10627	0.986767	0.910859	0.596472	0.345028	0.068643
Leaf_Cluster_B (1531)	Seita.7G097200	-0.449537	-0.378969	-0.731347	-1.15417	-1.05864	-0.925722	-0.81649	-0.746466	-0.854559	-0.943502	-0.971645	-1.0051	0.311864	0.346608	0.986009	1.73164	1.6336	1.67847	1.39705	1.11544	1.05872	-0.0448141	-0.121559	-0.05688
Leaf_Cluster_B (1531)	Seita.7G102200	-0.624069	-1.23723	-1.03314	-0.243214	0.013732	-0.15054	-1.33841	-1.19398	-1.0868	-1.19142	-1.67987	-0.782452	0.692304	0.701891	0.893241	1.59284	1.34532	1.36624	0.476698	0.765835	0.758705	0.694926	0.50748	0.751919
Leaf_Cluster_B (1531)	Seita.7G104000	-0.853898	-0.747793	-0.996294	-0.956426	-0.953987	-0.681473	-1.10115	-0.766102	-0.460402	-1.10115	-0.861468	-0.957541	1.16624	0.95876	0.255866	-0.0380262	0.634868	0.458252	0.840904	0.883163	0.0936419	1.81727	1.93006	1.43668
Leaf_Cluster_B (1531)	Seita.7G104500	-1.33395	-1.25781	-1.72184	-0.742253	-0.178927	-0.218392	-0.163362	-0.822883	0.0123801	-0.816305	-1.43521	-1.14316	1.30656	1.54656	0.780026	0.657901	0.656522	0.243565	0.266699	0.0752834	0.264755	1.10772	1.30033	1.61579
Leaf_Cluster_B (1531)	Seita.7G105600	-1.35851	-1.19133	-1.1929	0.0914569	0.602809	0.519241	-0.955184	-0.709615	-0.843919	-0.946315	-1.55012	-1.39169	0.201279	-0.00922651	0.0048639	1.50158	1.22362	1.80301	0.556271	0.492071	0.57517	0.53316	0.959538	1.08474
Leaf_Cluster_B (1531)	Seita.7G109200	-0.699927	-1.33999	-1.30487	-0.341935	-0.459364	-0.435502	-1.19353	-0.9299	-0.631801	-1.08627	-1.25811	-0.789478	1.54783	1.19823	1.36465	1.47901	1.27813	1.30819	-0.00672697	0.350516	0.230117	0.636222	0.653651	0.430845
Leaf_Cluster_B (1531)	Seita.7G114700	-1.11649	-0.920406	-1.38903	-0.889457	-0.708629	0.157553	-0.696601	-0.54184	-0.79264	-0.719964	-1.44994	-1.34059	0.105078	1.08864	0.619924	0.130912	0.427548	0.945467	1.09494	1.33333	0.469244	1.57783	1.47134	1.14379
Leaf_Cluster_B (1531)	Seita.7G114900	-0.65799	-0.608558	-0.760189	-0.566179	-0.446476	-0.553037	-0.793604	-0.793604	-0.793604	-0.793604	-0.793604	-0.793604	0.952639	0.820128	0.377414	2.74263	1.77106	1.98487	-0.0746967	-0.187495	-0.326713	0.642924	0.0148913	-0.363604
Leaf_Cluster_B (1531)	Seita.7G115400	-0.77078	-0.755412	-1.04174	-0.89933	-0.87353	-0.526731	-0.909041	-0.844264	-1.06314	-1.04219	-1.01162	-1.03411	1.61101	1.08514	1.79602	1.17102	1.05445	1.3721	0.435614	0.291448	-0.0483889	0.603166	0.882874	0.517439
Leaf_Cluster_B (1531)	Seita.7G116800	-0.827085	-0.881997	-0.808413	-0.824296	-0.779607	-0.847696	-0.644143	-0.517785	-0.85562	-0.774115	-0.824293	-0.774843	0.768016	1.03392	1.36838	0.0913672	-0.457924	1.02822	2.57428	1.79116	0.404073	0.788908	0.264532	-0.295041
Leaf_Cluster_B (1531)	Seita.7G119200	-1.22702	-0.575625	-0.884902	-0.380714	0.494087	-0.587098	0.319907	-1.19397	-1.39585	-0.731377	-1.65272	-0.528536	1.46044	0.71262	1.48166	2.08234	1.25278	0.918752	0.554571	0.366377	-0.582368	0.403588	-0.307646	0.000708386
Leaf_Cluster_B (1531)	Seita.7G120800	-0.733808	-1.75952	-0.87673	-2.05728	-1.51239	-1.02372	0.637211	0.312577	-1.22885	0.824883	0.367583	0.0496563	0.288393	1.41097	1.20324	0.599896	1.01596	0.676338	0.708728	0.847334	0.553057	0.817159	-0.606443	-0.514259
Leaf_Cluster_B (1531)	Seita.7G122000	-1.02131	-1.05659	-1.54865	0.264453	-0.54469	0.0967358	-1.15852	-1.08929	-1.41329	-0.822272	-0.890475	-0.321853	0.556098	0.301109	-0.0729544	2.03393	1.35366	1.05743	0.289181	0.460125	0.454328	1.75615	0.763601	0.553082
Leaf_Cluster_B (1531)	Seita.7G122100	-0.920845	-0.958097	-1.09706	-0.841583	-0.914779	-0.769774	-0.676879	-1.03554	-1.11389	-0.765702	-1.16094	-1.04225	1.46569	1.03379	1.39873	1.39615	1.12549	1.02691	0.646617	0.294971	0.617611	0.819842	0.64646	0.825077
Leaf_Cluster_B (1531)	Seita.7G128700	-1.2053	-0.896601	-1.03904	-0.247791	-0.657911	-0.371446	-0.9731	-1.35646	-0.819428	-0.973818	-1.29682	-0.965278	1.60636	1.34788	0.308358	0.946064	0.898084	1.15477	-0.0458838	0.705639	0.588988	1.22074	1.04726	1.02474
Leaf_Cluster_B (1531)	Seita.7G132300	-0.129714	-0.100573	-0.51253	-0.399662	-0.554188	-0.410208	-1.21362	-0.795286	-1.08007	-0.893577	-0.754499	-0.76935	1.10692	1.11005	0.573844	1.79166	1.68036	2.03433	0.82795	0.339524	0.359169	-0.939681	0.159703	-1.43055
Leaf_Cluster_B (1531)	Seita.7G136800	-0.798282	-0.810002	-1.04852	-0.536798	-0.654302	-0.690662	-0.751917	-0.906481	-1.04852	-0.883946	-0.822334	-0.854022	1.80311	0.288217	0.824285	2.76937	0.775822	0.910908	0.745571	0.422679	0.825241	0.456095	0.0241823	-0.0396914
Leaf_Cluster_B (1531)	Seita.7G139600	-0.728857	-0.700068	-1.02591	-0.750717	-0.886679	-0.70108	-0.596636	-0.856656	-0.483892	-1.55211	-1.4462	-1.52726	0.744357	0.629249	0.692426	0.92169	0.84981	1.05469	1.22785	1.03242	1.14511	1.03182	1.03012	0.896511
[truncated: 18,901 more rows]
