# Supplementary material for: Response of Multiple Tissues to Drought Revealed by a Weighted Gene Co-Expression Network Analysis in Foxtail Millet [Setaria italica (L.) P. Beauv.]
Source: Front Plant Sci. 2022 Jan 12;12:746166. doi: 10.3389/fpls.2021.746166 (PMC8790073; doi:10.3389/fpls.2021.746166)
Supplement: Supplementary Table S10 — A list of GO and KEGG categories of k-means clusters. [file Table_10.XLSX]

## Sheet: Supplementary Table S10
Supplementary Table S10: List of GO and KEGG categories of k-means clusters
Cluster	ONTOLOGY	GO_ID	Description	GeneRatio	BgRatio	pvalue	p.adjust	qvalue	geneID	Count		Cluster	KEGG_ID	Description	GeneRatio	BgRatio	pvalue	p.adjust	qvalue	geneID	Count
Root.Cluster_A	BP	GO:0006979	response to oxidative stress	52/658	380/9983	3.18204e-07	0.000618907	0.000598559	Seita.1G012200/Seita.1G045200/Seita.1G134200/Seita.1G192100/Seita.1G210300/Seita.1G272900/Seita.2G081000/Seita.2G225500/Seita.3G111700/Seita.4G169900/Seita.5G046700/Seita.5G047800/Seita.5G119800/Seita.5G207000/Seita.6G036100/Seita.7G023900/Seita.7G126300/Seita.7G225300/Seita.7G331800/Seita.8G228200/Seita.9G043300/Seita.9G064400/Seita.9G470600/Seita.9G488400/Seita.J011900/Seita.1G044800/Seita.1G06…	52		Root.Cluster_A	sita00500	Starch and sucrose metabolism	28/336	180/5494	3.39008e-06	0.000315277	0.000281912	Seita.2G168000/Seita.2G237100/Seita.3G133300/Seita.4G099700/Seita.4G101200/Seita.5G134800/Seita.5G313600/Seita.5G334800/Seita.5G429100/Seita.7G088700/Seita.7G243900/Seita.8G083400/Seita.9G229700/Seita.9G410800/Seita.9G416600/Seita.2G342900/Seita.2G366300/Seita.2G398700/Seita.4G191200/Seita.4G286200/Seita.6G118900/Seita.7G164500/Seita.9G085600/Seita.9G389200/Seita.9G544600/Seita.3G109600/Seita.2G3…	28
Root.Cluster_A	BP	GO:0009408	response to heat	33/658	199/9983	7.11375e-07	0.000691812	0.000669067	Seita.1G012200/Seita.1G045200/Seita.1G324300/Seita.1G342400/Seita.4G267900/Seita.5G047800/Seita.5G093000/Seita.5G207000/Seita.9G106800/Seita.9G470600/Seita.9G488400/Seita.9G543300/Seita.2G038000/Seita.3G175700/Seita.5G092900/Seita.5G131300/Seita.5G131400/Seita.5G351700/Seita.7G116400/Seita.7G164700/Seita.9G137000/Seita.9G424800/Seita.9G455400/Seita.1G293800/Seita.4G089400/Seita.4G111400/Seita.5G0…	33		Root.Cluster_A	sita00052	Galactose metabolism	13/336	65/5494	0.000119694	0.00556575	0.00497673	Seita.2G081000/Seita.3G119400/Seita.5G119800/Seita.5G134800/Seita.5G313600/Seita.8G228200/Seita.9G043300/Seita.9G208200/Seita.2G432600/Seita.2G438500/Seita.7G132000/Seita.9G424800/Seita.3G109600	13
Root.Cluster_A	BP	GO:0009414	response to water deprivation	46/658	340/9983	2.14634e-06	0.00139154	0.00134579	Seita.1G161800/Seita.1G324300/Seita.2G406500/Seita.3G162400/Seita.4G082000/Seita.4G112000/Seita.5G046700/Seita.5G119800/Seita.5G166200/Seita.5G166300/Seita.6G114000/Seita.6G164700/Seita.6G178100/Seita.7G184600/Seita.7G228200/Seita.8G115400/Seita.8G125500/Seita.9G064400/Seita.9G229700/Seita.9G410800/Seita.9G420500/Seita.1G267200/Seita.1G327600/Seita.2G229500/Seita.5G351700/Seita.5G393800/Seita.6G1…	46		Root.Cluster_A	sita00650	Butanoate metabolism	8/336	30/5494	0.000320821	0.00994544	0.00889293	Seita.1G069500/Seita.6G177000/Seita.7G115400/Seita.7G236000/Seita.9G564900/Seita.5G047000/Seita.6G111400/Seita.9G431600	8
Root.Cluster_A	BP	GO:0009644	response to high light intensity	18/658	80/9983	3.25262e-06	0.00146604	0.00141784	Seita.1G012200/Seita.1G045200/Seita.5G014300/Seita.5G207000/Seita.9G470600/Seita.9G488400/Seita.1G206500/Seita.3G175700/Seita.9G137000/Seita.9G424800/Seita.1G002200/Seita.2G164500/Seita.4G099200/Seita.5G092400/Seita.9G149700/Seita.9G457400/Seita.2G053300/Seita.9G108100	18		Root.Cluster_A	sita04141	Protein processing in endoplasmic reticulum	26/336	217/5494	0.000660348	0.0153531	0.0137283	Seita.1G045200/Seita.1G342400/Seita.3G216900/Seita.5G093000/Seita.5G336600/Seita.9G120300/Seita.9G451500/Seita.9G470600/Seita.5G092600/Seita.5G092900/Seita.5G131300/Seita.5G131400/Seita.5G376100/Seita.6G122600/Seita.7G009200/Seita.9G458600/Seita.1G000400/Seita.1G032700/Seita.1G293800/Seita.3G271000/Seita.4G089400/Seita.4G111400/Seita.5G092400/Seita.8G079900/Seita.9G458700/Seita.9G461500	26
Root.Cluster_A	BP	GO:0009415	response to water	46/658	347/9983	3.76875e-06	0.00146604	0.00141784	Seita.1G161800/Seita.1G324300/Seita.2G406500/Seita.3G162400/Seita.4G082000/Seita.4G112000/Seita.5G046700/Seita.5G119800/Seita.5G166200/Seita.5G166300/Seita.6G114000/Seita.6G164700/Seita.6G178100/Seita.7G184600/Seita.7G228200/Seita.8G115400/Seita.8G125500/Seita.9G064400/Seita.9G229700/Seita.9G410800/Seita.9G420500/Seita.1G267200/Seita.1G327600/Seita.2G229500/Seita.5G351700/Seita.5G393800/Seita.6G1…	46		Root.Cluster_B	sita00940	Phenylpropanoid biosynthesis	92/669	282/5494	1.05483e-20	1.08648e-18	8.10555e-19	Seita.1G240600/Seita.1G281400/Seita.2G254000/Seita.2G371600/Seita.2G407100/Seita.2G407300/Seita.2G430900/Seita.2G431500/Seita.2G431600/Seita.3G004800/Seita.3G022600/Seita.3G052900/Seita.3G053000/Seita.3G190400/Seita.3G234900/Seita.3G235000/Seita.4G135100/Seita.4G255800/Seita.4G259700/Seita.5G029700/Seita.5G029800/Seita.5G053300/Seita.5G155200/Seita.5G170000/Seita.5G210300/Seita.6G093400/Seita.6G1…	92
Root.Cluster_A	BP	GO:0000302	response to reactive oxygen species	30/658	197/9983	1.32669e-05	0.0043007	0.0041593	Seita.1G012200/Seita.1G045200/Seita.1G192100/Seita.1G210300/Seita.2G225500/Seita.5G047800/Seita.5G207000/Seita.7G023900/Seita.7G126300/Seita.7G225300/Seita.7G331800/Seita.9G470600/Seita.9G488400/Seita.1G206500/Seita.3G175700/Seita.3G286500/Seita.6G037200/Seita.6G210000/Seita.9G137000/Seita.9G198800/Seita.9G424800/Seita.1G335200/Seita.3G060800/Seita.4G111400/Seita.5G092400/Seita.5G342100/Seita.7G2…	30		Root.Cluster_B	sita04626	Plant-pathogen interaction	60/669	243/5494	2.75197e-08	1.41726e-06	1.05733e-06	Seita.2G024600/Seita.2G246400/Seita.3G142500/Seita.3G206900/Seita.3G290500/Seita.3G350300/Seita.4G163600/Seita.5G175100/Seita.5G330300/Seita.5G365500/Seita.5G456800/Seita.6G120000/Seita.6G120100/Seita.7G147800/Seita.7G312800/Seita.8G026400/Seita.8G087300/Seita.8G168900/Seita.8G176000/Seita.9G135600/Seita.9G415800/Seita.9G427100/Seita.9G470700/Seita.9G555600/Seita.1G102100/Seita.1G345400/Seita.2G0…	60
Root.Cluster_A	BP	GO:0051186	cofactor metabolic process	47/658	379/9983	1.79578e-05	0.00498969	0.00482564	Seita.1G047500/Seita.1G127500/Seita.1G134200/Seita.1G192100/Seita.1G357900/Seita.3G036400/Seita.3G245500/Seita.4G024000/Seita.4G267900/Seita.5G047800/Seita.5G134800/Seita.5G253900/Seita.5G313600/Seita.6G075200/Seita.7G023900/Seita.7G173800/Seita.7G225300/Seita.8G104800/Seita.8G118200/Seita.9G064400/Seita.9G266700/Seita.1G156200/Seita.2G180100/Seita.2G182300/Seita.2G382400/Seita.4G248900/Seita.6G2…	47		Root.Cluster_B	sita00531	Glycosaminoglycan degradation	10/669	17/5494	5.85818e-06	0.000201131	0.000150052	Seita.1G354100/Seita.2G365000/Seita.4G053700/Seita.5G440300/Seita.5G440400/Seita.9G399100/Seita.3G240700/Seita.5G409400/Seita.7G265200/Seita.8G078700	10
Root.Cluster_A	BP	GO:0055082	cellular chemical homeostasis	24/658	144/9983	2.13462e-05	0.0051898	0.00501917	Seita.1G274100/Seita.3G049900/Seita.4G138500/Seita.4G159500/Seita.5G103100/Seita.5G134800/Seita.5G313600/Seita.6G123500/Seita.7G088700/Seita.7G331800/Seita.8G118200/Seita.9G533500/Seita.9G543800/Seita.1G231200/Seita.2G197500/Seita.3G166700/Seita.4G235900/Seita.4G259400/Seita.9G344700/Seita.1G379500/Seita.2G159000/Seita.2G426200/Seita.3G109600/Seita.5G342100	24		Root.Cluster_B	sita00061	Fatty acid biosynthesis	18/669	57/5494	8.50071e-05	0.00218893	0.00163303	Seita.2G108900/Seita.3G051400/Seita.4G040200/Seita.7G112600/Seita.8G049100/Seita.1G166400/Seita.4G067400/Seita.4G256200/Seita.6G021700/Seita.6G113700/Seita.6G255800/Seita.7G030200/Seita.7G259500/Seita.7G334200/Seita.8G028000/Seita.9G437400/Seita.2G159500/Seita.2G389400	18
Root.Cluster_A	BP	GO:0009642	response to light intensity	22/658	127/9983	2.52445e-05	0.00545562	0.00527625	Seita.1G012200/Seita.1G045200/Seita.5G014300/Seita.5G207000/Seita.9G470600/Seita.9G488400/Seita.1G206500/Seita.3G175700/Seita.9G137000/Seita.9G424800/Seita.1G002200/Seita.2G164500/Seita.2G335600/Seita.3G158600/Seita.4G099200/Seita.5G092400/Seita.7G220500/Seita.7G280800/Seita.9G149700/Seita.9G457400/Seita.2G053300/Seita.9G108100	22		Root.Cluster_B	sita00010	Glycolysis / Gluconeogenesis	37/669	165/5494	0.000129128	0.00266003	0.00198449	Seita.1G004400/Seita.1G221800/Seita.1G307000/Seita.1G314800/Seita.3G111200/Seita.3G247900/Seita.4G093100/Seita.5G377300/Seita.5G380500/Seita.7G122900/Seita.7G123000/Seita.7G315100/Seita.9G027100/Seita.9G458800/Seita.9G510900/Seita.9G511000/Seita.1G071600/Seita.1G177400/Seita.1G322900/Seita.2G191000/Seita.3G192600/Seita.3G227500/Seita.3G391300/Seita.5G135500/Seita.5G158800/Seita.6G156600/Seita.7G1…	37
Root.Cluster_A	BP	GO:0055065	metal ion homeostasis	23/658	140/9983	3.9931e-05	0.00776659	0.00751124	Seita.1G019500/Seita.1G274100/Seita.2G309200/Seita.3G049900/Seita.4G138500/Seita.5G103100/Seita.7G331800/Seita.8G118200/Seita.9G543800/Seita.1G206500/Seita.1G231200/Seita.2G197500/Seita.3G166700/Seita.4G235900/Seita.4G259400/Seita.9G344700/Seita.1G002200/Seita.1G278500/Seita.1G379500/Seita.2G159000/Seita.2G426200/Seita.5G342100/Seita.7G220500	23		Root.Cluster_B	sita00520	Amino sugar and nucleotide sugar metabolism	35/669	161/5494	0.000368199	0.00632074	0.00471553	Seita.1G112800/Seita.2G365000/Seita.2G382900/Seita.3G337900/Seita.5G278700/Seita.5G390000/Seita.5G390100/Seita.7G150100/Seita.7G150700/Seita.9G339100/Seita.9G422700/Seita.1G225300/Seita.3G240700/Seita.3G271400/Seita.5G029100/Seita.5G087000/Seita.5G251600/Seita.5G389800/Seita.5G389900/Seita.5G409400/Seita.6G090000/Seita.7G239100/Seita.8G176300/Seita.2G247400/Seita.3G011800/Seita.6G060000/Seita.7G2…	35
Root.Cluster_A	BP	GO:0050801	ion homeostasis	30/658	213/9983	6.06314e-05	0.0107207	0.0103683	Seita.1G019500/Seita.1G256100/Seita.1G263000/Seita.1G274100/Seita.2G309200/Seita.3G049900/Seita.4G138500/Seita.4G159500/Seita.4G268700/Seita.5G103100/Seita.6G123500/Seita.7G331800/Seita.8G118200/Seita.9G533500/Seita.9G543800/Seita.1G206500/Seita.1G231200/Seita.2G197500/Seita.3G166700/Seita.4G235900/Seita.4G259400/Seita.9G344700/Seita.1G002200/Seita.1G278500/Seita.1G379500/Seita.2G159000/Seita.2G4…	30		Root.Cluster_B	sita00904	Diterpenoid biosynthesis	12/669	35/5494	0.00055972	0.00823588	0.0061443	Seita.2G144900/Seita.2G145800/Seita.2G145900/Seita.4G235500/Seita.4G235600/Seita.5G157700/Seita.5G323400/Seita.5G404900/Seita.6G100500/Seita.8G166500/Seita.9G004400/Seita.6G089500	12
Root.Cluster_A	BP	GO:0048878	chemical homeostasis	40/658	327/9983	0.000102586	0.014915	0.0144247	Seita.1G019500/Seita.1G256100/Seita.1G263000/Seita.1G274100/Seita.2G229900/Seita.2G309200/Seita.3G049900/Seita.3G116300/Seita.4G138500/Seita.4G159500/Seita.4G268700/Seita.5G103100/Seita.5G134800/Seita.5G313600/Seita.6G123500/Seita.7G088700/Seita.7G199400/Seita.7G318000/Seita.7G331800/Seita.8G118200/Seita.9G533500/Seita.9G543800/Seita.1G063600/Seita.1G206500/Seita.1G231200/Seita.2G197500/Seita.3G1…	40		Root.Cluster_B	sita00620	Pyruvate metabolism	26/669	113/5494	0.000845436	0.010885	0.00812063	Seita.1G004400/Seita.1G307000/Seita.1G314800/Seita.3G247900/Seita.5G380500/Seita.9G027100/Seita.9G510900/Seita.9G511000/Seita.1G177400/Seita.3G391300/Seita.5G134300/Seita.5G158800/Seita.5G301800/Seita.5G324500/Seita.6G156600/Seita.7G030200/Seita.7G268900/Seita.7G281700/Seita.8G026900/Seita.9G073100/Seita.9G284800/Seita.9G314300/Seita.9G431700/Seita.2G137100/Seita.2G394400/Seita.2G057100	26
Root.Cluster_A	BP	GO:0098771	inorganic ion homeostasis	26/658	179/9983	0.000111056	0.014915	0.0144247	Seita.1G019500/Seita.1G256100/Seita.1G263000/Seita.1G274100/Seita.2G309200/Seita.3G049900/Seita.4G138500/Seita.5G103100/Seita.7G331800/Seita.8G118200/Seita.9G543800/Seita.1G206500/Seita.1G231200/Seita.2G197500/Seita.3G166700/Seita.4G235900/Seita.4G259400/Seita.9G344700/Seita.1G002200/Seita.1G278500/Seita.1G379500/Seita.2G159000/Seita.2G426200/Seita.3G150400/Seita.5G342100/Seita.7G220500	26		Root.Cluster_B	sita00780	Biotin metabolism	9/669	27/5494	0.00341749	0.0391113	0.0291786	Seita.4G040200/Seita.7G112600/Seita.1G166400/Seita.4G256200/Seita.6G021700/Seita.6G113700/Seita.6G255800/Seita.2G159500/Seita.2G389400	9
Root.Cluster_A	BP	GO:0009636	response to toxic substance	33/658	252/9983	0.000113297	0.014915	0.0144247	Seita.1G012200/Seita.1G045200/Seita.1G192100/Seita.2G406500/Seita.4G020900/Seita.5G015400/Seita.5G207000/Seita.5G346500/Seita.5G463200/Seita.7G023900/Seita.7G193900/Seita.7G225300/Seita.7G331800/Seita.8G153700/Seita.9G064400/Seita.9G470600/Seita.9G488400/Seita.1G206500/Seita.3G175700/Seita.3G286500/Seita.6G210000/Seita.9G137000/Seita.9G370000/Seita.9G424800/Seita.9G444900/Seita.2G132500/Seita.3G0…	33		Root.Cluster_B	sita00910	Nitrogen metabolism	11/669	38/5494	0.00435413	0.0448476	0.0334581	Seita.1G181000/Seita.6G178500/Seita.6G180000/Seita.1G114900/Seita.1G311400/Seita.2G235500/Seita.5G240000/Seita.5G240100/Seita.5G286900/Seita.6G179900/Seita.7G186100	11
Root.Cluster_A	BP	GO:0006873	cellular ion homeostasis	20/658	121/9983	0.000115026	0.014915	0.0144247	Seita.1G274100/Seita.3G049900/Seita.4G138500/Seita.4G159500/Seita.5G103100/Seita.6G123500/Seita.7G331800/Seita.8G118200/Seita.9G533500/Seita.9G543800/Seita.1G231200/Seita.2G197500/Seita.3G166700/Seita.4G235900/Seita.4G259400/Seita.9G344700/Seita.1G379500/Seita.2G159000/Seita.2G426200/Seita.5G342100	20		Root.Cluster_C	sita00940	Phenylpropanoid biosynthesis	136/1354	282/5494	1.01914e-18	1.17201e-16	8.68952e-17	Seita.2G407600/Seita.5G030300/Seita.5G053200/Seita.5G100900/Seita.5G101100/Seita.5G191900/Seita.9G537300/Seita.9G492700/Seita.J003200/Seita.1G098500/Seita.2G208500/Seita.9G181400/Seita.9G184100/Seita.3G190300/Seita.5G145500/Seita.7G164200/Seita.7G164400/Seita.7G281100/Seita.7G334800/Seita.9G355500/Seita.2G004800/Seita.2G254100/Seita.1G022900/Seita.1G240400/Seita.2G147600/Seita.7G265300/Seita.5G35…	136
Root.Cluster_A	BP	GO:0005982	starch metabolic process	13/658	61/9983	0.000135731	0.0164998	0.0159573	Seita.2G168000/Seita.2G237100/Seita.3G133300/Seita.4G099700/Seita.7G088700/Seita.9G229700/Seita.9G410800/Seita.2G398700/Seita.4G151100/Seita.4G286200/Seita.9G544600/Seita.1G244200/Seita.8G014700	13		Root.Cluster_C	sita00480	Glutathione metabolism	65/1354	141/5494	1.62589e-08	9.34888e-07	6.93143e-07	Seita.9G262500/Seita.9G338500/Seita.2G293400/Seita.9G121000/Seita.2G033200/Seita.3G038700/Seita.4G232000/Seita.5G453500/Seita.8G008300/Seita.8G040400/Seita.9G346100/Seita.9G346200/Seita.9G346400/Seita.9G346800/Seita.9G446500/Seita.2G178900/Seita.5G453000/Seita.5G453200/Seita.5G279900/Seita.5G279800/Seita.9G444200/Seita.1G192100/Seita.2G406500/Seita.5G047800/Seita.7G023900/Seita.7G225300/Seita.9G0…	65
Root.Cluster_A	BP	GO:0006790	sulfur compound metabolic process	31/658	239/9983	0.000215793	0.0246892	0.0238775	Seita.1G047500/Seita.3G140700/Seita.4G024000/Seita.5G047800/Seita.5G251200/Seita.5G257200/Seita.8G118200/Seita.9G064400/Seita.9G140100/Seita.1G156200/Seita.1G158700/Seita.2G042900/Seita.2G180100/Seita.4G199600/Seita.4G248900/Seita.5G282500/Seita.5G300000/Seita.8G163100/Seita.9G069700/Seita.9G446400/Seita.3G018100/Seita.3G060800/Seita.3G167400/Seita.3G186600/Seita.3G187400/Seita.5G342100/Seita.6G1…	31		Root.Cluster_C	sita00500	Starch and sucrose metabolism	77/1354	180/5494	4.53092e-08	1.73685e-06	1.28774e-06	Seita.7G109100/Seita.9G492700/Seita.1G098500/Seita.6G022200/Seita.1G179000/Seita.3G253500/Seita.5G237300/Seita.7G164200/Seita.7G164400/Seita.9G101500/Seita.2G254100/Seita.4G288800/Seita.7G091700/Seita.8G179800/Seita.5G356600/Seita.2G168000/Seita.2G237100/Seita.3G133300/Seita.4G099700/Seita.4G101200/Seita.5G134800/Seita.5G313600/Seita.5G334800/Seita.5G429100/Seita.7G088700/Seita.7G243900/Seita.8G0…	77
Root.Cluster_A	BP	GO:0030001	metal ion transport	31/658	243/9983	0.000290749	0.031417	0.0303841	Seita.1G019500/Seita.1G165200/Seita.1G274100/Seita.3G049900/Seita.4G138500/Seita.4G195900/Seita.5G015400/Seita.7G193900/Seita.7G228200/Seita.7G230500/Seita.7G331800/Seita.8G118200/Seita.9G339800/Seita.1G231200/Seita.2G197500/Seita.2G206200/Seita.4G259400/Seita.5G189900/Seita.5G439500/Seita.8G008600/Seita.9G085500/Seita.9G344700/Seita.1G002200/Seita.1G278500/Seita.1G379500/Seita.2G159000/Seita.2G4…	31		Root.Cluster_C	sita04075	Plant hormone signal transduction	101/1354	267/5494	6.48711e-07	1.86504e-05	1.38278e-05	Seita.2G163200/Seita.2G267500/Seita.3G109200/Seita.5G018300/Seita.9G290900/Seita.2G216400/Seita.2G231300/Seita.3G189100/Seita.9G288200/Seita.9G358800/Seita.1G333600/Seita.2G426000/Seita.2G058900/Seita.2G439900/Seita.3G218800/Seita.3G230400/Seita.4G060600/Seita.4G161100/Seita.4G226200/Seita.5G126200/Seita.5G257700/Seita.5G314500/Seita.6G009300/Seita.8G027100/Seita.9G054500/Seita.9G169200/Seita.2G0…	101
Root.Cluster_A	BP	GO:0042542	response to hydrogen peroxide	15/658	85/9983	0.000390513	0.0392353	0.0379453	Seita.1G012200/Seita.1G045200/Seita.5G207000/Seita.7G331800/Seita.9G470600/Seita.9G488400/Seita.1G206500/Seita.3G175700/Seita.9G137000/Seita.9G424800/Seita.3G060800/Seita.5G092400/Seita.5G342100/Seita.9G425300/Seita.9G108100	15		Root.Cluster_C	sita00010	Glycolysis / Gluconeogenesis	68/1354	165/5494	1.47878e-06	3.4012e-05	2.52171e-05	Seita.8G023600/Seita.1G253300/Seita.3G140600/Seita.8G023700/Seita.3G209500/Seita.7G283900/Seita.1G295200/Seita.3G219400/Seita.4G141400/Seita.5G251100/Seita.7G226400/Seita.8G024300/Seita.8G099000/Seita.9G284900/Seita.7G315200/Seita.4G108300/Seita.4G267900/Seita.4G268700/Seita.5G113700/Seita.5G134800/Seita.5G313600/Seita.8G099100/Seita.9G036700/Seita.9G203200/Seita.9G416100/Seita.6G162900/Seita.7G1…	68
Root.Cluster_A	BP	GO:0018107	peptidyl-threonine phosphorylation	8/658	29/9983	0.00042362	0.0392353	0.0379453	Seita.4G175800/Seita.5G145900/Seita.2G206200/Seita.5G145700/Seita.6G163200/Seita.5G325500/Seita.7G300300/Seita.7G140200	8		Root.Cluster_C	sita00910	Nitrogen metabolism	22/1354	38/5494	1.1876e-05	0.000227623	0.000168764	Seita.1G115700/Seita.1G115800/Seita.1G116000/Seita.1G116100/Seita.3G024100/Seita.1G331300/Seita.9G118300/Seita.5G198500/Seita.7G325400/Seita.9G226000/Seita.1G334700/Seita.1G181000/Seita.6G178500/Seita.6G180000/Seita.1G114900/Seita.1G311400/Seita.2G235500/Seita.5G240000/Seita.5G240100/Seita.5G286900/Seita.6G179900/Seita.7G186100	22
Root.Cluster_A	BP	GO:0018210	peptidyl-threonine modification	8/658	29/9983	0.00042362	0.0392353	0.0379453	Seita.4G175800/Seita.5G145900/Seita.2G206200/Seita.5G145700/Seita.6G163200/Seita.5G325500/Seita.7G300300/Seita.7G140200	8		Root.Cluster_C	sita04626	Plant-pathogen interaction	88/1354	243/5494	2.58191e-05	0.000374804	0.000277887	Seita.5G164400/Seita.7G133100/Seita.1G042400/Seita.6G200000/Seita.9G124900/Seita.9G290900/Seita.J027900/Seita.3G170600/Seita.9G341400/Seita.8G183100/Seita.1G336400/Seita.6G056700/Seita.7G187000/Seita.8G064700/Seita.2G024900/Seita.9G097000/Seita.7G165000/Seita.5G451500/Seita.8G090200/Seita.1G308900/Seita.3G188100/Seita.5G354700/Seita.4G225400/Seita.7G009200/Seita.8G064200/Seita.9G085500/Seita.9G30…	88
Root.Cluster_A	BP	GO:0055080	cation homeostasis	23/658	164/9983	0.000455444	0.0402654	0.0389416	Seita.1G019500/Seita.1G274100/Seita.2G309200/Seita.3G049900/Seita.4G138500/Seita.5G103100/Seita.7G331800/Seita.8G118200/Seita.9G543800/Seita.1G206500/Seita.1G231200/Seita.2G197500/Seita.3G166700/Seita.4G235900/Seita.4G259400/Seita.9G344700/Seita.1G002200/Seita.1G278500/Seita.1G379500/Seita.2G159000/Seita.2G426200/Seita.5G342100/Seita.7G220500	23		Root.Cluster_C	sita00520	Amino sugar and nucleotide sugar metabolism	63/1354	161/5494	2.60733e-05	0.000374804	0.000277887	Seita.2G058300/Seita.2G058400/Seita.2G282600/Seita.3G250400/Seita.2G045900/Seita.5G237300/Seita.6G113400/Seita.7G230800/Seita.9G448500/Seita.4G286000/Seita.7G150600/Seita.2G107300/Seita.6G219700/Seita.7G150300/Seita.7G150400/Seita.7G150500/Seita.2G003000/Seita.2G168000/Seita.3G119400/Seita.3G133300/Seita.4G101200/Seita.5G134800/Seita.5G313600/Seita.7G055300/Seita.9G409000/Seita.9G551200/Seita.9G4…	63
Root.Cluster_A	BP	GO:0006875	cellular metal ion homeostasis	16/658	96/9983	0.000492853	0.0416782	0.040308	Seita.1G274100/Seita.3G049900/Seita.5G103100/Seita.7G331800/Seita.8G118200/Seita.9G543800/Seita.1G231200/Seita.2G197500/Seita.3G166700/Seita.4G235900/Seita.4G259400/Seita.9G344700/Seita.1G379500/Seita.2G159000/Seita.2G426200/Seita.5G342100	16		Root.Cluster_C	sita04016	MAPK signaling pathway - plant	64/1354	167/5494	4.80429e-05	0.000613881	0.000455143	Seita.5G164400/Seita.7G194000/Seita.1G295400/Seita.3G250400/Seita.9G124900/Seita.9G290900/Seita.3G170600/Seita.3G160700/Seita.9G117700/Seita.1G117500/Seita.3G164200/Seita.3G218800/Seita.3G230400/Seita.5G257700/Seita.6G056700/Seita.9G169200/Seita.2G024900/Seita.4G286000/Seita.9G097000/Seita.1G049200/Seita.1G030500/Seita.2G437500/Seita.3G139000/Seita.5G354700/Seita.5G395400/Seita.6G005300/Seita.7G1…	64
Root.Cluster_A	BP	GO:0009845	seed germination	24/658	176/9983	0.000524646	0.0425182	0.0411203	Seita.1G275400/Seita.2G169700/Seita.2G225500/Seita.3G033600/Seita.3G139000/Seita.4G143700/Seita.4G159500/Seita.6G123500/Seita.6G164700/Seita.7G112500/Seita.7G140000/Seita.7G212900/Seita.8G118200/Seita.9G533500/Seita.2G156300/Seita.2G193000/Seita.4G288100/Seita.6G210000/Seita.9G128500/Seita.1G335200/Seita.3G288600/Seita.9G425300/Seita.2G053300/Seita.3G112300	24		Root.Cluster_C	sita00620	Pyruvate metabolism	45/1354	113/5494	0.000228403	0.00243918	0.00180845	Seita.1G253300/Seita.7G283900/Seita.8G169200/Seita.3G219400/Seita.6G036000/Seita.8G099000/Seita.9G284900/Seita.3G109300/Seita.4G119800/Seita.2G401000/Seita.3G020300/Seita.4G108300/Seita.5G314300/Seita.6G036100/Seita.8G099100/Seita.9G203200/Seita.4G117200/Seita.9G431600/Seita.6G251800/Seita.1G004400/Seita.1G307000/Seita.1G314800/Seita.3G247900/Seita.5G380500/Seita.9G027100/Seita.9G510900/Seita.9G5…	45
Root.Cluster_A	BP	GO:0009409	response to cold	41/658	368/9983	0.00061976	0.0467694	0.0452317	Seita.1G192100/Seita.1G308900/Seita.1G324300/Seita.2G401000/Seita.3G162400/Seita.5G046700/Seita.5G166200/Seita.5G166300/Seita.6G055700/Seita.6G114000/Seita.6G178100/Seita.7G228200/Seita.7G331800/Seita.8G115400/Seita.8G125500/Seita.9G064400/Seita.9G416100/Seita.9G420500/Seita.1G267200/Seita.2G156300/Seita.4G151100/Seita.4G225400/Seita.5G351700/Seita.8G115200/Seita.9G128500/Seita.9G162500/Seita.9G1…	41		Root.Cluster_C	sita00941	Flavonoid biosynthesis	22/1354	44/5494	0.000233312	0.00243918	0.00180845	Seita.5G100900/Seita.5G101100/Seita.2G208500/Seita.9G242900/Seita.7G249200/Seita.7G281100/Seita.7G036600/Seita.7G036700/Seita.5G361200/Seita.2G208600/Seita.7G301800/Seita.5G237900/Seita.6G164300/Seita.7G047600/Seita.7G301600/Seita.8G140200/Seita.1G000700/Seita.2G010900/Seita.5G318800/Seita.9G034700/Seita.1G230100/Seita.7G249600	22
Root.Cluster_A	BP	GO:0006560	proline metabolic process	5/658	12/9983	0.000657236	0.0467694	0.0452317	Seita.3G165100/Seita.5G381100/Seita.5G015100/Seita.9G069700/Seita.3G220500	5		Root.Cluster_C	sita00531	Glycosaminoglycan degradation	11/1354	17/5494	0.000536261	0.00474384	0.00351717	Seita.9G494300/Seita.1G354100/Seita.2G365000/Seita.4G053700/Seita.5G440300/Seita.5G440400/Seita.9G399100/Seita.3G240700/Seita.5G409400/Seita.7G265200/Seita.8G078700	11
Root.Cluster_A	BP	GO:0030003	cellular cation homeostasis	17/658	108/9983	0.000658751	0.0467694	0.0452317	Seita.1G274100/Seita.3G049900/Seita.4G138500/Seita.5G103100/Seita.7G331800/Seita.8G118200/Seita.9G543800/Seita.1G231200/Seita.2G197500/Seita.3G166700/Seita.4G235900/Seita.4G259400/Seita.9G344700/Seita.1G379500/Seita.2G159000/Seita.2G426200/Seita.5G342100	17		Root.Cluster_C	sita00905	Brassinosteroid biosynthesis	11/1354	17/5494	0.000536261	0.00474384	0.00351717	Seita.3G114000/Seita.9G480100/Seita.7G132100/Seita.2G219600/Seita.9G173500/Seita.2G219500/Seita.7G318000/Seita.8G027000/Seita.5G139200/Seita.2G219700/Seita.4G224700	11
Root.Cluster_A	BP	GO:0017001	antibiotic catabolic process	7/658	24/9983	0.000673287	0.0467694	0.0452317	Seita.1G192100/Seita.7G023900/Seita.7G225300/Seita.6G210000/Seita.7G168700/Seita.2G132500/Seita.3G060800	7		Root.Cluster_C	sita00052	Galactose metabolism	28/1354	65/5494	0.000808724	0.00664309	0.00492531	Seita.2G282600/Seita.7G091700/Seita.2G081000/Seita.3G119400/Seita.5G119800/Seita.5G134800/Seita.5G313600/Seita.8G228200/Seita.9G043300/Seita.9G208200/Seita.2G432600/Seita.2G438500/Seita.7G132000/Seita.9G424800/Seita.3G109600/Seita.1G112800/Seita.3G111200/Seita.7G091600/Seita.7G122900/Seita.7G123000/Seita.7G181300/Seita.4G263300/Seita.5G135500/Seita.7G122800/Seita.7G123100/Seita.9G207800/Seita.9G2…	28
Root.Cluster_A	CC	GO:0009501	amyloplast	8/635	19/9955	1.05626e-05	0.00263008	0.00241271	Seita.2G168000/Seita.2G237100/Seita.3G133300/Seita.4G099700/Seita.2G398700/Seita.4G286200/Seita.9G085600/Seita.1G244200	8		Root.Cluster_C	sita00906	Carotenoid biosynthesis	18/1354	37/5494	0.00129011	0.00927264	0.00687491	Seita.9G156500/Seita.2G104900/Seita.4G288600/Seita.9G041900/Seita.2G105100/Seita.2G229900/Seita.2G303000/Seita.3G391000/Seita.2G042900/Seita.7G116400/Seita.7G209000/Seita.1G367300/Seita.3G397800/Seita.7G189300/Seita.8G101900/Seita.8G168400/Seita.1G055200/Seita.8G158400	18
Root.Cluster_A	CC	GO:0009526	plastid envelope	49/635	451/9955	0.000156095	0.0194338	0.0178277	Seita.1G041300/Seita.1G070400/Seita.1G160200/Seita.1G272900/Seita.2G127900/Seita.2G217800/Seita.2G401000/Seita.2G410100/Seita.3G036400/Seita.3G094900/Seita.5G026800/Seita.6G036100/Seita.6G075200/Seita.6G208200/Seita.7G331800/Seita.9G008400/Seita.9G022000/Seita.9G027200/Seita.9G195600/Seita.9G431100/Seita.9G543300/Seita.1G206500/Seita.3G175700/Seita.4G151100/Seita.7G116400/Seita.7G164700/Seita.7G2…	49		Root.Cluster_C	sita02010	ABC transporters	18/1354	37/5494	0.00129011	0.00927264	0.00687491	Seita.1G055700/Seita.1G191100/Seita.5G291100/Seita.5G163300/Seita.5G283600/Seita.2G127900/Seita.4G047900/Seita.5G189700/Seita.7G039700/Seita.3G159900/Seita.5G031800/Seita.6G060300/Seita.7G029100/Seita.7G140300/Seita.7G258700/Seita.1G190900/Seita.5G283000/Seita.7G040200	18
Root.Cluster_B	BP	GO:0032787	monocarboxylic acid metabolic process	93/1212	411/9983	8.91352e-10	2.00554e-06	1.83619e-06	Seita.1G103700/Seita.1G265100/Seita.1G371900/Seita.2G187800/Seita.2G187900/Seita.2G300900/Seita.2G360500/Seita.3G051400/Seita.3G056400/Seita.3G096900/Seita.3G097200/Seita.3G111200/Seita.3G165200/Seita.3G170100/Seita.3G346000/Seita.3G346200/Seita.4G021600/Seita.4G078000/Seita.5G071800/Seita.5G386300/Seita.5G434700/Seita.6G011600/Seita.6G012200/Seita.6G125000/Seita.7G163500/Seita.7G168500/Seita.7G1…	93		Root.Cluster_C	sita00061	Fatty acid biosynthesis	24/1354	57/5494	0.00271065	0.0183368	0.0135952	Seita.3G087000/Seita.9G276700/Seita.9G234600/Seita.9G234800/Seita.5G429700/Seita.2G151800/Seita.2G108900/Seita.3G051400/Seita.4G040200/Seita.7G112600/Seita.8G049100/Seita.1G166400/Seita.4G067400/Seita.4G256200/Seita.6G021700/Seita.6G113700/Seita.6G255800/Seita.7G030200/Seita.7G259500/Seita.7G334200/Seita.8G028000/Seita.9G437400/Seita.2G159500/Seita.2G389400	24
Root.Cluster_B	BP	GO:0016053	organic acid biosynthetic process	89/1212	420/9983	5.83647e-08	4.37735e-05	4.00771e-05	Seita.1G371900/Seita.2G000900/Seita.2G144900/Seita.2G300900/Seita.2G390100/Seita.3G111200/Seita.3G153400/Seita.3G165200/Seita.3G346000/Seita.3G346200/Seita.3G375200/Seita.4G021600/Seita.4G078000/Seita.4G096300/Seita.4G235500/Seita.4G235600/Seita.5G323400/Seita.5G404900/Seita.6G011600/Seita.6G012200/Seita.6G087600/Seita.6G125000/Seita.7G020900/Seita.7G096600/Seita.7G163500/Seita.8G005700/Seita.8G1…	89		Root.Cluster_C	sita00944	Flavone and flavonol biosynthesis	7/1354	10/5494	0.00318167	0.0203273	0.0150711	Seita.8G117700/Seita.8G192500/Seita.8G192600/Seita.9G242900/Seita.7G172100/Seita.8G203200/Seita.5G124300	7
Root.Cluster_B	BP	GO:0046394	carboxylic acid biosynthetic process	89/1212	420/9983	5.83647e-08	4.37735e-05	4.00771e-05	Seita.1G371900/Seita.2G000900/Seita.2G144900/Seita.2G300900/Seita.2G390100/Seita.3G111200/Seita.3G153400/Seita.3G165200/Seita.3G346000/Seita.3G346200/Seita.3G375200/Seita.4G021600/Seita.4G078000/Seita.4G096300/Seita.4G235500/Seita.4G235600/Seita.5G323400/Seita.5G404900/Seita.6G011600/Seita.6G012200/Seita.6G087600/Seita.6G125000/Seita.7G020900/Seita.7G096600/Seita.7G163500/Seita.8G005700/Seita.8G1…	89		Root.Cluster_C	sita00908	Zeatin biosynthesis	18/1354	40/5494	0.0038261	0.0231579	0.0171697	Seita.7G194300/Seita.6G155100/Seita.5G447700/Seita.7G194800/Seita.1G042000/Seita.2G201000/Seita.9G042300/Seita.3G156200/Seita.5G124200/Seita.1G041700/Seita.4G082500/Seita.9G360600/Seita.4G082100/Seita.5G337500/Seita.6G174400/Seita.7G139300/Seita.7G171700/Seita.7G194200	18
Root.Cluster_B	BP	GO:0019748	secondary metabolic process	69/1212	305/9983	1.43762e-07	8.08664e-05	7.40377e-05	Seita.1G064000/Seita.2G033500/Seita.2G132800/Seita.2G145700/Seita.2G145800/Seita.2G145900/Seita.2G278500/Seita.2G283800/Seita.2G300900/Seita.3G096900/Seita.3G097200/Seita.3G097400/Seita.3G142500/Seita.3G339800/Seita.4G021600/Seita.4G121900/Seita.4G181500/Seita.4G216300/Seita.4G235500/Seita.4G235600/Seita.5G386300/Seita.5G434700/Seita.6G093400/Seita.6G100500/Seita.6G132000/Seita.7G139200/Seita.7G1…	69		Root.Cluster_C	sita00904	Diterpenoid biosynthesis	16/1354	35/5494	0.00519254	0.0298571	0.0221366	Seita.9G262400/Seita.9G415500/Seita.5G147400/Seita.3G074700/Seita.2G144900/Seita.2G145800/Seita.2G145900/Seita.4G235500/Seita.4G235600/Seita.5G157700/Seita.5G323400/Seita.5G404900/Seita.6G100500/Seita.8G166500/Seita.9G004400/Seita.6G089500	16
Root.Cluster_B	BP	GO:0009617	response to bacterium	83/1212	395/9983	2.42541e-07	0.000109143	9.99268e-05	Seita.1G127700/Seita.1G295700/Seita.2G156200/Seita.2G179700/Seita.3G009100/Seita.3G067600/Seita.3G185800/Seita.3G287100/Seita.3G315000/Seita.4G163600/Seita.4G181500/Seita.5G043400/Seita.5G044000/Seita.5G104100/Seita.5G412600/Seita.5G448000/Seita.5G450000/Seita.5G451100/Seita.6G011600/Seita.6G012200/Seita.6G125000/Seita.6G232500/Seita.7G091600/Seita.7G100500/Seita.7G181300/Seita.7G236800/Seita.7G2…	83		Root.Cluster_D	sita04075	Plant hormone signal transduction	19/126	267/5494	8.46251e-06	0.000550063	0.000550063	Seita.1G333600/Seita.2G426000/Seita.2G058900/Seita.2G439900/Seita.3G218800/Seita.3G230400/Seita.4G060600/Seita.4G161100/Seita.4G226200/Seita.5G126200/Seita.5G257700/Seita.5G314500/Seita.6G009300/Seita.8G027100/Seita.9G054500/Seita.9G169200/Seita.2G024900/Seita.4G279000/Seita.7G318100	19
Root.Cluster_B	BP	GO:0042445	hormone metabolic process	65/1212	288/9983	3.63567e-07	0.000136338	0.000124825	Seita.1G371900/Seita.2G000900/Seita.2G144900/Seita.2G390100/Seita.2G436000/Seita.3G170100/Seita.3G201500/Seita.4G015700/Seita.4G078000/Seita.4G235500/Seita.4G235600/Seita.5G139200/Seita.5G157700/Seita.5G208900/Seita.5G323400/Seita.5G404900/Seita.6G011600/Seita.6G012200/Seita.6G097400/Seita.6G125000/Seita.7G168500/Seita.7G189300/Seita.7G204200/Seita.7G306400/Seita.8G101900/Seita.8G166500/Seita.8G1…	65		Root.Cluster_E	sita00480	Glutathione metabolism	17/120	141/5494	6.91609e-09	5.04874e-07	4.58646e-07	Seita.2G033200/Seita.3G038700/Seita.4G232000/Seita.5G453500/Seita.8G008300/Seita.8G040400/Seita.9G346100/Seita.9G346200/Seita.9G346400/Seita.9G346800/Seita.9G446500/Seita.2G178900/Seita.5G453000/Seita.5G453200/Seita.5G279900/Seita.5G279800/Seita.9G444200	17
Root.Cluster_B	BP	GO:0010817	regulation of hormone levels	80/1212	390/9983	1.11828e-06	0.000359449	0.000329095	Seita.1G228300/Seita.1G371900/Seita.2G000900/Seita.2G144900/Seita.2G390100/Seita.2G436000/Seita.3G170100/Seita.3G201500/Seita.4G015700/Seita.4G078000/Seita.4G235500/Seita.4G235600/Seita.4G257500/Seita.5G139200/Seita.5G157700/Seita.5G208900/Seita.5G285200/Seita.5G323400/Seita.5G325800/Seita.5G351400/Seita.5G404900/Seita.6G011600/Seita.6G012200/Seita.6G060300/Seita.6G097400/Seita.6G125000/Seita.7G0…	80		Root.Cluster_E	sita00944	Flavone and flavonol biosynthesis	3/120	10/5494	0.00109025	0.0397943	0.0361506	Seita.7G172100/Seita.8G203200/Seita.5G124300	3
Root.Cluster_B	BP	GO:0042446	hormone biosynthetic process	48/1212	200/9983	2.01914e-06	0.000567884	0.000519929	Seita.1G371900/Seita.2G000900/Seita.2G144900/Seita.2G390100/Seita.2G436000/Seita.4G078000/Seita.4G235500/Seita.4G235600/Seita.5G139200/Seita.5G208900/Seita.5G323400/Seita.5G404900/Seita.6G011600/Seita.6G012200/Seita.6G097400/Seita.6G125000/Seita.7G189300/Seita.7G204200/Seita.7G306400/Seita.8G101900/Seita.8G166500/Seita.8G168400/Seita.9G004400/Seita.9G021400/Seita.9G061300/Seita.9G061500/Seita.9G1…	48		Root.Cluster_F	sita00944	Flavone and flavonol biosynthesis	4/103	10/5494	2.24428e-05	0.00159344	0.00141744	Seita.8G117700/Seita.8G192500/Seita.8G192600/Seita.9G242900	4
Root.Cluster_B	BP	GO:0006720	isoprenoid metabolic process	46/1212	191/9983	2.96913e-06	0.000742284	0.000679602	Seita.1G367300/Seita.2G000900/Seita.2G144900/Seita.2G145800/Seita.2G145900/Seita.2G187800/Seita.2G187900/Seita.2G300900/Seita.2G390100/Seita.4G015700/Seita.4G021600/Seita.4G223200/Seita.4G235500/Seita.4G235600/Seita.5G071800/Seita.5G157700/Seita.5G285200/Seita.5G323400/Seita.5G404900/Seita.6G100500/Seita.7G189300/Seita.8G068800/Seita.8G069000/Seita.8G101900/Seita.8G166500/Seita.8G168400/Seita.9G0…	46		Root.Cluster_F	sita00910	Nitrogen metabolism	5/103	38/5494	0.000645024	0.0228984	0.0203692	Seita.1G115700/Seita.1G115800/Seita.1G116000/Seita.1G116100/Seita.3G024100	5
Root.Cluster_B	BP	GO:0006721	terpenoid metabolic process	40/1212	159/9983	4.17743e-06	0.000763602	0.00069912	Seita.1G367300/Seita.2G000900/Seita.2G144900/Seita.2G145800/Seita.2G145900/Seita.2G300900/Seita.2G390100/Seita.4G015700/Seita.4G021600/Seita.4G223200/Seita.4G235500/Seita.4G235600/Seita.5G071800/Seita.5G157700/Seita.5G285200/Seita.5G323400/Seita.5G404900/Seita.6G100500/Seita.7G189300/Seita.8G068800/Seita.8G069000/Seita.8G101900/Seita.8G166500/Seita.8G168400/Seita.9G004400/Seita.9G021400/Seita.9G0…	40		Stem.Cluster_A	sita03010	Ribosome	66/265	334/5494	7.58434e-25	6.75007e-23	6.75007e-23	Seita.1G028300/Seita.1G214900/Seita.2G055300/Seita.2G079700/Seita.2G267400/Seita.2G389700/Seita.3G036600/Seita.3G162800/Seita.3G197300/Seita.3G330100/Seita.4G160400/Seita.5G096600/Seita.5G262600/Seita.6G112100/Seita.6G231500/Seita.7G057900/Seita.7G134600/Seita.8G046000/Seita.8G124200/Seita.9G044700/Seita.9G544700/Seita.1G003100/Seita.1G073500/Seita.1G119400/Seita.1G160500/Seita.1G205300/Seita.2G0…	66
Root.Cluster_B	BP	GO:0010200	response to chitin	30/1212	105/9983	4.35847e-06	0.000763602	0.00069912	Seita.1G034600/Seita.1G257600/Seita.1G278900/Seita.2G156100/Seita.2G156200/Seita.2G179700/Seita.2G195200/Seita.3G287100/Seita.4G163600/Seita.4G197100/Seita.4G235200/Seita.5G044000/Seita.5G208300/Seita.5G363900/Seita.7G094300/Seita.7G186400/Seita.1G053800/Seita.1G064700/Seita.1G067400/Seita.1G185100/Seita.2G013400/Seita.2G269700/Seita.3G007200/Seita.5G001000/Seita.6G181700/Seita.1G253100/Seita.3G2…	30		Stem.Cluster_B	sita04075	Plant hormone signal transduction	14/96	267/5494	0.000192288	0.0115373	0.0105252	Seita.1G195000/Seita.3G080900/Seita.3G109400/Seita.3G223500/Seita.5G230500/Seita.6G009300/Seita.3G019000/Seita.4G279000/Seita.5G389500/Seita.7G318100/Seita.5G134600/Seita.5G389300/Seita.5G451100/Seita.7G100500	14
Root.Cluster_B	BP	GO:0016101	diterpenoid metabolic process	23/1212	70/9983	4.3739e-06	0.000763602	0.00069912	Seita.2G000900/Seita.2G144900/Seita.2G145800/Seita.2G145900/Seita.2G390100/Seita.4G015700/Seita.4G235500/Seita.4G235600/Seita.5G157700/Seita.5G323400/Seita.5G404900/Seita.6G100500/Seita.8G068800/Seita.8G069000/Seita.8G166500/Seita.9G004400/Seita.9G241000/Seita.1G021400/Seita.1G034400/Seita.1G317500/Seita.3G201400/Seita.4G101100/Seita.6G089500	23		Stem.Cluster_B	sita02010	ABC transporters	5/96	37/5494	0.00041074	0.0123222	0.0112413	Seita.1G055500/Seita.5G302200/Seita.1G191000/Seita.5G031800/Seita.1G145300	5
Root.Cluster_B	BP	GO:0072330	monocarboxylic acid biosynthetic process	51/1212	223/9983	4.41192e-06	0.000763602	0.00069912	Seita.1G371900/Seita.2G300900/Seita.3G111200/Seita.3G165200/Seita.3G346000/Seita.4G021600/Seita.4G078000/Seita.6G011600/Seita.6G012200/Seita.6G125000/Seita.7G163500/Seita.8G005700/Seita.9G004800/Seita.9G061300/Seita.9G061500/Seita.9G109200/Seita.9G205600/Seita.9G205700/Seita.9G205800/Seita.9G344800/Seita.9G440900/Seita.9G483700/Seita.1G121100/Seita.1G379700/Seita.2G190100/Seita.2G290900/Seita.3G0…	51		Stem.Cluster_C	sita00196	Photosynthesis - antenna proteins	12/729	16/5494	2.99609e-08	3.2957e-06	2.93301e-06	Seita.2G217800/Seita.2G299200/Seita.2G351600/Seita.2G352900/Seita.2G366600/Seita.3G143800/Seita.4G139900/Seita.5G215600/Seita.6G158500/Seita.7G121800/Seita.8G080900/Seita.9G177100	12
Root.Cluster_B	BP	GO:0044550	secondary metabolite biosynthetic process	50/1212	218/9983	5.01446e-06	0.000805896	0.000737842	Seita.1G064000/Seita.2G132800/Seita.2G145700/Seita.2G145800/Seita.2G145900/Seita.2G278500/Seita.2G283800/Seita.3G142500/Seita.3G339800/Seita.4G021600/Seita.4G181500/Seita.4G216300/Seita.4G235500/Seita.4G235600/Seita.5G386300/Seita.5G434700/Seita.6G093400/Seita.6G100500/Seita.6G132000/Seita.7G139200/Seita.7G168500/Seita.8G068800/Seita.8G069000/Seita.9G193900/Seita.9G241000/Seita.9G281800/Seita.9G3…	50		Stem.Cluster_C	sita03010	Ribosome	77/729	334/5494	3.19053e-07	1.75479e-05	1.56168e-05	Seita.6G011300/Seita.8G045900/Seita.1G028300/Seita.1G214900/Seita.2G055300/Seita.2G079700/Seita.2G267400/Seita.2G389700/Seita.3G036600/Seita.3G162800/Seita.3G197300/Seita.3G330100/Seita.4G160400/Seita.5G096600/Seita.5G262600/Seita.6G112100/Seita.6G231500/Seita.7G057900/Seita.7G134600/Seita.8G046000/Seita.8G124200/Seita.9G044700/Seita.9G544700/Seita.1G003100/Seita.1G073500/Seita.1G119400/Seita.1G1…	77
Root.Cluster_B	BP	GO:0008299	isoprenoid biosynthetic process	39/1212	155/9983	5.46946e-06	0.00082042	0.00075114	Seita.1G367300/Seita.2G000900/Seita.2G144900/Seita.2G187800/Seita.2G187900/Seita.2G300900/Seita.2G390100/Seita.4G021600/Seita.4G223200/Seita.4G235500/Seita.4G235600/Seita.5G071800/Seita.5G285200/Seita.5G323400/Seita.5G404900/Seita.7G189300/Seita.8G068800/Seita.8G069000/Seita.8G101900/Seita.8G166500/Seita.8G168400/Seita.9G004400/Seita.9G061300/Seita.9G061500/Seita.9G241000/Seita.9G344800/Seita.1G0…	39		Stem.Cluster_C	sita00500	Starch and sucrose metabolism	43/729	180/5494	5.96027e-05	0.00218543	0.00194493	Seita.1G092000/Seita.1G262000/Seita.2G327700/Seita.5G356600/Seita.6G141700/Seita.3G059500/Seita.7G164300/Seita.7G164500/Seita.4G263300/Seita.9G328900/Seita.1G323700/Seita.2G396200/Seita.2G396100/Seita.3G176900/Seita.1G318200/Seita.2G342900/Seita.3G133300/Seita.7G088700/Seita.8G083400/Seita.9G229700/Seita.9G410800/Seita.9G544600/Seita.9G416600/Seita.J032000/Seita.9G381600/Seita.9G350600/Seita.2G25…	43
Root.Cluster_B	BP	GO:0042742	defense response to bacterium	68/1212	331/9983	6.82525e-06	0.000931812	0.000853126	Seita.1G127700/Seita.1G295700/Seita.2G156200/Seita.2G179700/Seita.3G009100/Seita.3G067600/Seita.3G185800/Seita.3G287100/Seita.4G163600/Seita.4G181500/Seita.5G043400/Seita.5G044000/Seita.5G412600/Seita.5G451100/Seita.6G011600/Seita.6G012200/Seita.6G125000/Seita.7G091600/Seita.7G100500/Seita.7G236800/Seita.7G286000/Seita.8G005200/Seita.8G179000/Seita.9G226700/Seita.9G330700/Seita.9G405000/Seita.9G5…	68		Stem.Cluster_C	sita00906	Carotenoid biosynthesis	14/729	37/5494	0.000147624	0.00405967	0.00361291	Seita.5G315800/Seita.7G189300/Seita.9G041800/Seita.8G101900/Seita.2G042900/Seita.3G391000/Seita.7G209000/Seita.2G035400/Seita.9G559200/Seita.2G229900/Seita.2G104900/Seita.6G181300/Seita.9G156500/Seita.7G116800	14
Root.Cluster_B	BP	GO:0055088	lipid homeostasis	19/1212	53/9983	7.04036e-06	0.000931812	0.000853126	Seita.2G277900/Seita.3G201500/Seita.3G243800/Seita.5G139200/Seita.5G232500/Seita.7G204200/Seita.8G166500/Seita.9G021400/Seita.9G205600/Seita.9G205700/Seita.9G205800/Seita.1G166600/Seita.3G243500/Seita.3G243700/Seita.4G194200/Seita.4G224700/Seita.6G089500/Seita.8G041200/Seita.1G373300	19		Stem.Cluster_C	sita04075	Plant hormone signal transduction	55/729	267/5494	0.000420551	0.00925213	0.00823395	Seita.1G050400/Seita.1G366100/Seita.2G437500/Seita.3G003200/Seita.3G398000/Seita.4G161100/Seita.5G387200/Seita.1G030500/Seita.1G195000/Seita.3G080900/Seita.3G109400/Seita.3G223500/Seita.5G230500/Seita.6G009300/Seita.3G019000/Seita.4G279000/Seita.5G389500/Seita.7G318100/Seita.5G134600/Seita.5G389300/Seita.5G451100/Seita.7G100500/Seita.1G356800/Seita.3G139000/Seita.5G137400/Seita.5G249000/Seita.6G0…	55
Root.Cluster_B	BP	GO:0006833	water transport	17/1212	45/9983	9.49425e-06	0.00109862	0.00100585	Seita.1G259900/Seita.2G123300/Seita.4G021600/Seita.4G180100/Seita.7G189600/Seita.8G085300/Seita.9G193500/Seita.9G268100/Seita.9G344800/Seita.2G123000/Seita.3G073300/Seita.3G101400/Seita.4G098700/Seita.5G007400/Seita.9G063400/Seita.4G160700/Seita.9G571600	17		Stem.Cluster_C	sita00905	Brassinosteroid biosynthesis	8/729	17/5494	0.000744158	0.0136429	0.0121415	Seita.5G139200/Seita.1G042800/Seita.5G123900/Seita.8G027000/Seita.2G219700/Seita.4G224700/Seita.7G132100/Seita.9G173500	8
Root.Cluster_B	BP	GO:0042044	fluid transport	17/1212	45/9983	9.49425e-06	0.00109862	0.00100585	Seita.1G259900/Seita.2G123300/Seita.4G021600/Seita.4G180100/Seita.7G189600/Seita.8G085300/Seita.9G193500/Seita.9G268100/Seita.9G344800/Seita.2G123000/Seita.3G073300/Seita.3G101400/Seita.4G098700/Seita.5G007400/Seita.9G063400/Seita.4G160700/Seita.9G571600	17		Stem.Cluster_C	sita00620	Pyruvate metabolism	27/729	113/5494	0.0013784	0.0216606	0.0192769	Seita.8G099000/Seita.1G307000/Seita.8G031600/Seita.9G284800/Seita.9G284900/Seita.7G144600/Seita.9G465500/Seita.3G020300/Seita.3G276100/Seita.4G108300/Seita.4G119800/Seita.5G134300/Seita.5G314300/Seita.7G268900/Seita.8G095900/Seita.8G099100/Seita.9G510900/Seita.5G074000/Seita.3G247900/Seita.5G158800/Seita.6G156600/Seita.9G073100/Seita.4G175200/Seita.6G251800/Seita.1G314800/Seita.1G177400/Seita.2G3…	27
Root.Cluster_B	BP	GO:0009753	response to jasmonic acid	48/1212	211/9983	9.76554e-06	0.00109862	0.00100585	Seita.1G324800/Seita.2G145800/Seita.2G145900/Seita.2G156200/Seita.2G217500/Seita.2G278500/Seita.3G287100/Seita.3G379400/Seita.4G091600/Seita.4G105900/Seita.5G044000/Seita.5G421200/Seita.5G451100/Seita.6G011600/Seita.6G012200/Seita.6G100500/Seita.6G190300/Seita.7G030000/Seita.7G141400/Seita.9G113800/Seita.9G226700/Seita.9G338800/Seita.9G437300/Seita.9G441600/Seita.9G518000/Seita.9G518100/Seita.1G0…	48		Stem.Cluster_C	sita00940	Phenylpropanoid biosynthesis	55/729	282/5494	0.00164301	0.0225914	0.0201053	Seita.1G230100/Seita.3G194300/Seita.4G191500/Seita.5G356600/Seita.6G055900/Seita.7G155700/Seita.8G015200/Seita.1G065800/Seita.2G431300/Seita.4G048300/Seita.7G164300/Seita.7G164500/Seita.2G371600/Seita.2G431500/Seita.3G271500/Seita.4G176800/Seita.1G240600/Seita.3G270300/Seita.6G163400/Seita.4G247400/Seita.6G026000/Seita.5G463200/Seita.9G562400/Seita.2G406500/Seita.2G254100/Seita.3G222700/Seita.3G2…	55
Root.Cluster_B	BP	GO:0006631	fatty acid metabolic process	43/1212	185/9983	1.60498e-05	0.00161259	0.00147642	Seita.1G103700/Seita.1G265100/Seita.2G360500/Seita.3G051400/Seita.3G056400/Seita.3G170100/Seita.3G346000/Seita.4G078000/Seita.5G386300/Seita.7G163500/Seita.7G197000/Seita.7G267400/Seita.8G049100/Seita.9G004800/Seita.9G068500/Seita.9G205600/Seita.9G205700/Seita.9G205800/Seita.9G554000/Seita.1G121600/Seita.1G340800/Seita.1G354800/Seita.2G190100/Seita.2G290900/Seita.3G183600/Seita.3G391300/Seita.3G3…	43		Stem.Cluster_C	sita00052	Galactose metabolism	17/729	65/5494	0.00383604	0.046885	0.0417254	Seita.4G055500/Seita.4G263300/Seita.1G206800/Seita.6G195300/Seita.2G081000/Seita.2G176100/Seita.7G132000/Seita.9G043300/Seita.9G208200/Seita.2G438500/Seita.3G119400/Seita.5G119800/Seita.8G228200/Seita.9G424800/Seita.1G112800/Seita.4G057000/Seita.7G122900	17
Root.Cluster_B	BP	GO:0008610	lipid biosynthetic process	78/1212	404/9983	1.61283e-05	0.00161259	0.00147642	Seita.1G367300/Seita.2G000900/Seita.2G144900/Seita.2G187800/Seita.2G187900/Seita.2G300900/Seita.2G390100/Seita.3G165200/Seita.3G346000/Seita.3G403100/Seita.4G021600/Seita.4G078000/Seita.4G223200/Seita.4G235500/Seita.4G235600/Seita.5G071800/Seita.5G139200/Seita.5G229200/Seita.5G238800/Seita.5G285200/Seita.5G323400/Seita.5G340800/Seita.5G404900/Seita.7G163500/Seita.7G189300/Seita.7G204200/Seita.8G0…	78		Stem.Cluster_D	sita00941	Flavonoid biosynthesis	7/115	44/5494	2.9608e-05	0.00192452	0.00168298	Seita.1G230100/Seita.3G194300/Seita.7G155700/Seita.7G249200/Seita.7G249600/Seita.7G301600/Seita.9G034700	7
Root.Cluster_B	BP	GO:0016114	terpenoid biosynthetic process	33/1212	128/9983	1.64843e-05	0.00161259	0.00147642	Seita.1G367300/Seita.2G000900/Seita.2G144900/Seita.2G300900/Seita.2G390100/Seita.4G021600/Seita.4G223200/Seita.4G235500/Seita.4G235600/Seita.5G071800/Seita.5G285200/Seita.5G323400/Seita.5G404900/Seita.7G189300/Seita.8G068800/Seita.8G069000/Seita.8G101900/Seita.8G166500/Seita.8G168400/Seita.9G004400/Seita.9G061300/Seita.9G061500/Seita.9G241000/Seita.9G344800/Seita.1G021400/Seita.1G034400/Seita.1G0…	33		Stem.Cluster_E	sita00196	Photosynthesis - antenna proteins	11/131	16/5494	3.66792e-15	2.27411e-13	2.12353e-13	Seita.2G299200/Seita.2G351600/Seita.2G352900/Seita.2G366600/Seita.3G143800/Seita.4G139900/Seita.5G215600/Seita.6G158500/Seita.7G121800/Seita.8G080900/Seita.9G177100	11
Root.Cluster_B	BP	GO:0062012	regulation of small molecule metabolic process	27/1212	96/9983	1.77993e-05	0.00166869	0.00152778	Seita.2G187800/Seita.2G187900/Seita.2G300900/Seita.2G436000/Seita.3G165200/Seita.4G021600/Seita.6G097400/Seita.6G125000/Seita.7G163500/Seita.7G306400/Seita.8G005700/Seita.9G205600/Seita.9G205700/Seita.9G205800/Seita.9G344800/Seita.1G116500/Seita.1G345400/Seita.1G347600/Seita.1G379700/Seita.3G015800/Seita.3G150700/Seita.3G183600/Seita.5G091900/Seita.7G308300/Seita.8G041200/Seita.5G417900/Seita.9G4…	27		Stem.Cluster_E	sita00940	Phenylpropanoid biosynthesis	25/131	282/5494	7.00277e-09	2.17086e-07	2.02712e-07	Seita.1G023000/Seita.1G023100/Seita.1G079000/Seita.3G053000/Seita.3G347500/Seita.4G259700/Seita.5G053000/Seita.5G361200/Seita.6G093400/Seita.6G224300/Seita.8G100100/Seita.9G091600/Seita.9G298200/Seita.9G298300/Seita.9G298400/Seita.9G411500/Seita.9G478000/Seita.9G562600/Seita.J003300/Seita.1G240300/Seita.3G190400/Seita.4G227800/Seita.5G046600/Seita.9G298500/Seita.9G492500	25
Root.Cluster_B	BP	GO:0009312	oligosaccharide biosynthetic process	14/1212	36/9983	3.98131e-05	0.00358318	0.0032806	Seita.1G323700/Seita.2G396200/Seita.3G346000/Seita.6G144600/Seita.9G004800/Seita.9G458800/Seita.2G188200/Seita.2G290900/Seita.3G227500/Seita.4G092100/Seita.6G240000/Seita.9G317500/Seita.9G328900/Seita.1G262000	14		Stem.Cluster_E	sita00073	Cutin, suberine and wax biosynthesis	7/131	37/5494	2.11653e-05	0.000437417	0.000408454	Seita.4G260400/Seita.5G386300/Seita.6G138200/Seita.7G197000/Seita.8G128800/Seita.9G214500/Seita.2G132800	7
Root.Cluster_B	BP	GO:0009685	gibberellin metabolic process	17/1212	50/9983	4.6816e-05	0.00405138	0.00370926	Seita.2G000900/Seita.2G144900/Seita.2G390100/Seita.4G015700/Seita.4G235500/Seita.4G235600/Seita.5G157700/Seita.5G323400/Seita.5G404900/Seita.8G166500/Seita.9G004400/Seita.1G021400/Seita.1G034400/Seita.1G317500/Seita.3G201400/Seita.4G101100/Seita.6G089500	17		Stem.Cluster_E	sita00520	Amino sugar and nucleotide sugar metabolism	11/131	161/5494	0.00148031	0.0229449	0.0214256	Seita.1G112800/Seita.1G347800/Seita.2G263800/Seita.2G382900/Seita.2G439200/Seita.5G357900/Seita.6G090000/Seita.7G257800/Seita.7G305700/Seita.6G105300/Seita.8G081300	11
Root.Cluster_B	BP	GO:0016102	diterpenoid biosynthetic process	17/1212	52/9983	8.23189e-05	0.00685991	0.00628063	Seita.2G000900/Seita.2G144900/Seita.2G390100/Seita.4G235500/Seita.4G235600/Seita.5G323400/Seita.5G404900/Seita.8G068800/Seita.8G069000/Seita.8G166500/Seita.9G004400/Seita.9G241000/Seita.1G021400/Seita.1G034400/Seita.1G317500/Seita.4G101100/Seita.6G089500	17		Stem.Cluster_F	sita00710	Carbon fixation in photosynthetic organisms	9/122	83/5494	8.05573e-05	0.00571957	0.00517263	Seita.3G247900/Seita.7G221500/Seita.9G067800/Seita.9G073100/Seita.4G175200/Seita.5G384700/Seita.6G251800/Seita.8G050800/Seita.9G525700	9
Root.Cluster_B	BP	GO:0010143	cutin biosynthetic process	12/1212	30/9983	0.000102901	0.00826881	0.00757056	Seita.1G116700/Seita.3G051400/Seita.3G165200/Seita.4G021600/Seita.5G386400/Seita.8G005700/Seita.9G101700/Seita.9G344800/Seita.2G238300/Seita.3G218600/Seita.4G001700/Seita.7G308300	12		Leaf.Cluster_A	sita00564	Glycerophospholipid metabolism	18/304	119/5494	7.99581e-05	0.00568602	0.00533342	Seita.3G095700/Seita.5G096100/Seita.8G009400/Seita.3G102100/Seita.3G193000/Seita.5G121900/Seita.5G129600/Seita.5G282300/Seita.5G350600/Seita.9G361200/Seita.2G217100/Seita.3G188000/Seita.3G218600/Seita.4G086600/Seita.5G023200/Seita.5G261900/Seita.9G306400/Seita.6G021900	18
Root.Cluster_B	BP	GO:0046839	phospholipid dephosphorylation	11/1212	26/9983	0.000109629	0.00834754	0.00764264	Seita.3G165800/Seita.7G307600/Seita.8G006600/Seita.9G205600/Seita.9G205700/Seita.9G205800/Seita.9G475400/Seita.1G322900/Seita.3G062800/Seita.5G296200/Seita.8G041200	11		Leaf.Cluster_A	sita04016	MAPK signaling pathway - plant	22/304	167/5494	0.000112594	0.00568602	0.00533342	Seita.2G024600/Seita.2G177500/Seita.2G437500/Seita.3G139000/Seita.3G164700/Seita.3G218800/Seita.5G164400/Seita.5G379400/Seita.5G395400/Seita.6G005300/Seita.7G021400/Seita.9G318200/Seita.9G460200/Seita.1G117500/Seita.3G206900/Seita.3G230400/Seita.3G369900/Seita.5G231200/Seita.5G257700/Seita.9G379000/Seita.9G423800/Seita.5G175100	22
Root.Cluster_B	BP	GO:0005975	carbohydrate metabolic process	85/1212	474/9983	0.000111301	0.00834754	0.00764264	Seita.1G112800/Seita.1G123400/Seita.1G268900/Seita.1G323700/Seita.2G187800/Seita.2G187900/Seita.2G396200/Seita.3G096400/Seita.3G111200/Seita.3G165200/Seita.3G165800/Seita.3G346000/Seita.4G223900/Seita.5G434700/Seita.6G087600/Seita.6G144600/Seita.7G122900/Seita.7G123000/Seita.7G159600/Seita.8G005700/Seita.8G053300/Seita.9G004800/Seita.9G091600/Seita.9G350600/Seita.9G422700/Seita.9G430600/Seita.9G4…	85		Leaf.Cluster_A	sita00591	Linoleic acid metabolism	5/304	16/5494	0.00132167	0.0309551	0.0290356	Seita.4G215400/Seita.6G205300/Seita.9G127700/Seita.9G127800/Seita.9G127600	5
Root.Cluster_B	BP	GO:0071466	cellular response to xenobiotic stimulus	8/1212	15/9983	0.000134964	0.00955732	0.00875026	Seita.5G104100/Seita.9G205600/Seita.9G205700/Seita.9G205800/Seita.1G089800/Seita.3G217600/Seita.5G008900/Seita.8G041200	8		Leaf.Cluster_A	sita00944	Flavone and flavonol biosynthesis	4/304	10/5494	0.00147938	0.0309551	0.0290356	Seita.5G124300/Seita.9G244600/Seita.9G393400/Seita.8G117700	4
Root.Cluster_B	BP	GO:0051301	cell division	52/1212	258/9983	0.000135926	0.00955732	0.00875026	Seita.1G197600/Seita.1G257600/Seita.1G268900/Seita.2G000900/Seita.2G156100/Seita.2G156200/Seita.2G390100/Seita.3G198000/Seita.3G337900/Seita.4G197200/Seita.4G223900/Seita.5G044000/Seita.6G159900/Seita.7G058500/Seita.7G186400/Seita.7G318900/Seita.9G109200/Seita.9G284500/Seita.9G399100/Seita.1G021400/Seita.1G034400/Seita.1G147700/Seita.1G197500/Seita.1G317500/Seita.1G318900/Seita.2G161300/Seita.2G2…	52		Leaf.Cluster_A	sita04075	Plant hormone signal transduction	27/304	267/5494	0.00153243	0.0309551	0.0290356	Seita.2G024600/Seita.2G177500/Seita.2G437500/Seita.3G139000/Seita.3G164700/Seita.3G218800/Seita.4G082000/Seita.5G312700/Seita.5G379400/Seita.5G393800/Seita.5G395400/Seita.6G005300/Seita.7G021400/Seita.9G318200/Seita.9G460200/Seita.1G331600/Seita.3G230400/Seita.3G369900/Seita.5G137400/Seita.5G231200/Seita.5G257700/Seita.1G252000/Seita.2G267500/Seita.3G246300/Seita.9G379000/Seita.9G518000/Seita.5G1…	27
Root.Cluster_B	BP	GO:0016311	dephosphorylation	46/1212	222/9983	0.000167151	0.0113854	0.0104239	Seita.1G116700/Seita.1G157400/Seita.1G323700/Seita.2G150000/Seita.2G286900/Seita.2G396200/Seita.3G131200/Seita.3G165800/Seita.5G299700/Seita.5G386400/Seita.6G144600/Seita.7G307600/Seita.7G324000/Seita.8G006600/Seita.9G101700/Seita.9G205600/Seita.9G205700/Seita.9G205800/Seita.9G437300/Seita.9G458800/Seita.9G475300/Seita.9G475400/Seita.1G102100/Seita.1G130300/Seita.1G159200/Seita.1G288600/Seita.1G2…	46		Leaf.Cluster_B	sita00195	Photosynthesis	12/170	90/5494	1.75376e-05	0.00145562	0.00143993	Seita.2G248100/Seita.2G356500/Seita.4G000900/Seita.4G207000/Seita.5G336700/Seita.6G082000/Seita.1G321900/Seita.3G304000/Seita.9G450200/Seita.1G016500/Seita.1G208500/Seita.9G149700	12
Root.Cluster_B	BP	GO:0046351	disaccharide biosynthetic process	10/1212	23/9983	0.000172045	0.0113854	0.0104239	Seita.1G323700/Seita.2G396200/Seita.6G144600/Seita.9G458800/Seita.2G188200/Seita.3G227500/Seita.4G092100/Seita.9G317500/Seita.9G328900/Seita.1G262000	10		Leaf.Cluster_C	sita04075	Plant hormone signal transduction	73/972	267/5494	3.97672e-05	0.00216343	0.00175791	Seita.1G075600/Seita.1G356800/Seita.2G058900/Seita.2G142900/Seita.2G375300/Seita.3G104000/Seita.4G060600/Seita.4G226200/Seita.5G126200/Seita.7G121700/Seita.9G097300/Seita.9G251600/Seita.9G314200/Seita.3G080900/Seita.9G162900/Seita.3G147000/Seita.4G279000/Seita.2G024600/Seita.2G177500/Seita.2G437500/Seita.3G139000/Seita.3G164700/Seita.3G218800/Seita.4G082000/Seita.5G312700/Seita.5G379400/Seita.5G3…	73
Root.Cluster_B	BP	GO:0007018	microtubule-based movement	21/1212	77/9983	0.000238448	0.0150796	0.0138062	Seita.1G360100/Seita.3G174700/Seita.5G055100/Seita.5G325800/Seita.6G243300/Seita.7G058500/Seita.9G177700/Seita.9G284500/Seita.J002300/Seita.1G052200/Seita.1G317100/Seita.2G207800/Seita.2G406300/Seita.3G151900/Seita.3G251500/Seita.5G179700/Seita.5G218400/Seita.8G146100/Seita.9G449500/Seita.3G217300/Seita.9G193600	21		Leaf.Cluster_C	sita00260	Glycine, serine and threonine metabolism	30/972	84/5494	5.43736e-05	0.00216343	0.00175791	Seita.6G167400/Seita.7G268900/Seita.1G133500/Seita.7G127300/Seita.2G109200/Seita.2G260500/Seita.3G206500/Seita.7G167000/Seita.7G265100/Seita.9G416100/Seita.1G072700/Seita.2G218400/Seita.6G117900/Seita.1G315800/Seita.7G315100/Seita.7G315200/Seita.2G361800/Seita.3G033500/Seita.4G209000/Seita.8G024300/Seita.5G020900/Seita.5G272800/Seita.7G166900/Seita.7G280500/Seita.6G072900/Seita.5G156300/Seita.5G2…	30
Root.Cluster_B	BP	GO:1905622	negative regulation of leaf development	8/1212	16/9983	0.000241273	0.0150796	0.0138062	Seita.3G287100/Seita.4G105900/Seita.2G072100/Seita.9G048400/Seita.9G048700/Seita.1G315600/Seita.4G106300/Seita.9G123000	8		Leaf.Cluster_C	sita00500	Starch and sucrose metabolism	53/972	180/5494	5.69322e-05	0.00216343	0.00175791	Seita.3G109600/Seita.4G101200/Seita.4G191200/Seita.5G134800/Seita.5G237300/Seita.9G091800/Seita.9G381600/Seita.9G389200/Seita.9G416600/Seita.9G371700/Seita.9G492500/Seita.2G168000/Seita.2G342900/Seita.5G334800/Seita.5G414600/Seita.9G229700/Seita.9G350600/Seita.9G410800/Seita.9G544600/Seita.7G152700/Seita.9G484900/Seita.2G134700/Seita.7G164000/Seita.9G243600/Seita.2G270400/Seita.2G396200/Seita.2G1…	53
Root.Cluster_B	BP	GO:1900673	olefin metabolic process	13/1212	37/9983	0.000249745	0.0151872	0.0139047	Seita.2G436000/Seita.6G097400/Seita.7G306400/Seita.9G109200/Seita.9G205600/Seita.9G205700/Seita.9G205800/Seita.1G345400/Seita.1G347600/Seita.7G208700/Seita.8G041200/Seita.9G117500/Seita.9G417600	13		Leaf.Cluster_C	sita00520	Amino sugar and nucleotide sugar metabolism	46/972	161/5494	0.000372636	0.00802918	0.00652418	Seita.2G003000/Seita.3G109600/Seita.4G101200/Seita.5G134800/Seita.5G237300/Seita.7G230800/Seita.9G409000/Seita.2G058300/Seita.J029100/Seita.2G168000/Seita.2G429400/Seita.7G150600/Seita.8G176300/Seita.9G460100/Seita.1G090800/Seita.2G382900/Seita.3G271400/Seita.5G275500/Seita.7G310600/Seita.9G448500/Seita.9G494000/Seita.2G365000/Seita.3G119400/Seita.3G198900/Seita.5G251600/Seita.8G136300/Seita.1G29…	46
Root.Cluster_B	BP	GO:0001676	long-chain fatty acid metabolic process	10/1212	24/9983	0.00026306	0.0155759	0.0142606	Seita.3G051400/Seita.8G049100/Seita.9G205600/Seita.9G205700/Seita.9G205800/Seita.1G340800/Seita.4G065000/Seita.8G028000/Seita.8G041200/Seita.9G077900	10		Leaf.Cluster_C	sita00944	Flavone and flavonol biosynthesis	7/972	10/5494	0.00038799	0.00802918	0.00652418	Seita.5G124300/Seita.9G244600/Seita.9G393400/Seita.8G117700/Seita.8G192500/Seita.7G172100/Seita.9G242900	7
Root.Cluster_B	BP	GO:0009686	gibberellin biosynthetic process	14/1212	42/9983	0.000274454	0.0158339	0.0144968	Seita.2G000900/Seita.2G144900/Seita.2G390100/Seita.4G235500/Seita.4G235600/Seita.5G323400/Seita.5G404900/Seita.8G166500/Seita.9G004400/Seita.1G021400/Seita.1G034400/Seita.1G317500/Seita.4G101100/Seita.6G089500	14		Leaf.Cluster_C	sita00330	Arginine and proline metabolism	21/972	57/5494	0.00043344	0.00802918	0.00652418	Seita.2G210300/Seita.4G021300/Seita.3G165100/Seita.3G220500/Seita.5G381100/Seita.9G048800/Seita.2G210400/Seita.2G218400/Seita.5G450800/Seita.2G313200/Seita.9G286700/Seita.1G307000/Seita.2G313400/Seita.9G330700/Seita.2G313300/Seita.5G063800/Seita.4G168600/Seita.1G253300/Seita.4G177400/Seita.5G291400/Seita.7G242500	21
Root.Cluster_B	BP	GO:0071395	cellular response to jasmonic acid stimulus	22/1212	85/9983	0.000384694	0.021639	0.0198117	Seita.2G145800/Seita.2G145900/Seita.2G156200/Seita.2G217500/Seita.3G287100/Seita.5G044000/Seita.5G451100/Seita.6G100500/Seita.9G437300/Seita.9G441600/Seita.9G518000/Seita.9G518100/Seita.1G113000/Seita.2G034500/Seita.5G331600/Seita.9G146300/Seita.9G251600/Seita.9G252500/Seita.9G357200/Seita.2G200400/Seita.3G146500/Seita.9G123000	22		Leaf.Cluster_C	sita00564	Glycerophospholipid metabolism	36/972	119/5494	0.00049302	0.00802918	0.00652418	Seita.1G171900/Seita.2G381500/Seita.5G341700/Seita.7G305300/Seita.5G456700/Seita.3G095700/Seita.5G096100/Seita.8G009400/Seita.3G102100/Seita.3G193000/Seita.5G121900/Seita.5G129600/Seita.5G282300/Seita.5G350600/Seita.9G361200/Seita.2G217100/Seita.3G188000/Seita.3G218600/Seita.4G086600/Seita.5G023200/Seita.5G261900/Seita.9G306400/Seita.6G021900/Seita.9G577900/Seita.3G274300/Seita.5G440500/Seita.5G4…	36
Root.Cluster_B	BP	GO:2000022	regulation of jasmonic acid mediated signaling pathway	11/1212	30/9983	0.00048904	0.0268376	0.0245713	Seita.2G217500/Seita.5G044000/Seita.9G441600/Seita.9G518000/Seita.9G518100/Seita.2G034500/Seita.5G331600/Seita.9G146300/Seita.9G251600/Seita.9G252500/Seita.2G200400	11		Leaf.Cluster_C	sita00906	Carotenoid biosynthesis	15/972	37/5494	0.000901221	0.0128424	0.0104352	Seita.2G035400/Seita.3G391000/Seita.9G559200/Seita.2G105100/Seita.2G303000/Seita.7G116800/Seita.9G156500/Seita.1G288100/Seita.2G104900/Seita.9G041800/Seita.9G041900/Seita.3G397800/Seita.2G229900/Seita.6G181300/Seita.7G209000	15
Root.Cluster_B	BP	GO:0006690	icosanoid metabolic process	7/1212	14/9983	0.00060398	0.0322961	0.0295689	Seita.3G056400/Seita.9G205600/Seita.9G205700/Seita.9G205800/Seita.1G340800/Seita.8G041200/Seita.9G077900	7		Leaf.Cluster_C	sita00052	Galactose metabolism	22/972	65/5494	0.00120941	0.0153192	0.0124477	Seita.3G109600/Seita.5G134800/Seita.7G132000/Seita.9G208200/Seita.2G081000/Seita.2G438500/Seita.8G228200/Seita.3G119400/Seita.4G057000/Seita.6G161700/Seita.9G424800/Seita.7G122800/Seita.9G286800/Seita.7G122900/Seita.3G111200/Seita.6G195300/Seita.9G207800/Seita.6G130900/Seita.2G176100/Seita.5G119800/Seita.5G313600/Seita.5G447800	22
Root.Cluster_B	BP	GO:0080186	developmental vegetative growth	9/1212	22/9983	0.000630722	0.0322961	0.0295689	Seita.4G105900/Seita.5G413200/Seita.3G036300/Seita.7G139300/Seita.7G194200/Seita.9G357200/Seita.1G315600/Seita.4G106300/Seita.9G123000	9		Leaf.Cluster_C	sita00010	Glycolysis / Gluconeogenesis	44/972	165/5494	0.00231476	0.0263883	0.021442	Seita.2G167900/Seita.3G109600/Seita.4G108300/Seita.5G113700/Seita.5G134800/Seita.5G377200/Seita.7G132000/Seita.7G268900/Seita.8G099100/Seita.5G251100/Seita.5G349200/Seita.9G439800/Seita.4G141400/Seita.8G095900/Seita.9G156800/Seita.9G416100/Seita.2G191000/Seita.2G218400/Seita.1G066400/Seita.5G380600/Seita.6G161700/Seita.1G315800/Seita.7G122800/Seita.7G315100/Seita.7G315200/Seita.9G286800/Seita.9G5…	44
Root.Cluster_B	BP	GO:0048528	post-embryonic root development	34/1212	159/9983	0.000631568	0.0322961	0.0295689	Seita.1G046800/Seita.1G228300/Seita.2G000900/Seita.2G077200/Seita.2G280700/Seita.2G390100/Seita.3G158300/Seita.3G368800/Seita.3G379400/Seita.4G021600/Seita.5G062700/Seita.6G060300/Seita.6G097400/Seita.7G029100/Seita.7G124900/Seita.7G258700/Seita.9G170100/Seita.9G222900/Seita.9G344800/Seita.9G539400/Seita.1G021400/Seita.1G034400/Seita.1G114900/Seita.1G317500/Seita.1G347600/Seita.2G302500/Seita.4G1…	34		Leaf.Cluster_C	sita00261	Monobactam biosynthesis	7/972	13/5494	0.00338193	0.0336636	0.0273536	Seita.4G190200/Seita.2G109200/Seita.4G159800/Seita.6G117900/Seita.7G207200/Seita.9G471300/Seita.9G010200	7
Root.Cluster_B	BP	GO:0090693	plant organ senescence	37/1212	178/9983	0.000658424	0.0329212	0.0301412	Seita.1G166500/Seita.2G179700/Seita.2G300900/Seita.2G436000/Seita.2G436400/Seita.3G287100/Seita.3G379400/Seita.4G017200/Seita.4G054900/Seita.4G105900/Seita.4G155100/Seita.4G163600/Seita.6G005100/Seita.7G038400/Seita.7G124900/Seita.7G306400/Seita.9G352300/Seita.9G367800/Seita.9G417900/Seita.9G506400/Seita.1G379700/Seita.2G072100/Seita.4G247100/Seita.5G064300/Seita.5G284300/Seita.5G392200/Seita.7G0…	37		Leaf.Cluster_C	sita00480	Glutathione metabolism	38/972	141/5494	0.00367559	0.0336636	0.0273536	Seita.4G114600/Seita.4G241000/Seita.5G171100/Seita.5G194300/Seita.5G279900/Seita.5G453200/Seita.5G453300/Seita.5G453500/Seita.7G023900/Seita.9G121000/Seita.9G262500/Seita.5G168800/Seita.5G453100/Seita.3G060800/Seita.9G064400/Seita.5G279800/Seita.5G452100/Seita.7G102200/Seita.7G122100/Seita.9G345300/Seita.9G424300/Seita.1G156200/Seita.8G008300/Seita.1G263500/Seita.5G453000/Seita.4G038800/Seita.5G4…	38
Root.Cluster_B	BP	GO:1901615	organic hydroxy compound metabolic process	52/1212	275/9983	0.000681425	0.0333306	0.030516	Seita.1G157400/Seita.2G300900/Seita.3G096900/Seita.3G097200/Seita.3G165800/Seita.3G201500/Seita.3G346200/Seita.4G021600/Seita.5G139200/Seita.5G340800/Seita.5G434700/Seita.6G011600/Seita.6G012200/Seita.6G125000/Seita.7G079000/Seita.7G168500/Seita.7G204200/Seita.7G286000/Seita.8G014200/Seita.8G136000/Seita.8G166500/Seita.9G021400/Seita.9G061300/Seita.9G061500/Seita.9G205600/Seita.9G205700/Seita.9G2…	52		Leaf.Cluster_C	sita00910	Nitrogen metabolism	14/972	38/5494	0.00383883	0.0336636	0.0273536	Seita.1G115800/Seita.1G116100/Seita.6G179900/Seita.6G189200/Seita.9G118300/Seita.5G240100/Seita.5G198500/Seita.2G235500/Seita.2G418200/Seita.7G325400/Seita.9G485600/Seita.5G240000/Seita.6G178500/Seita.1G331300	14
Root.Cluster_B	BP	GO:0006805	xenobiotic metabolic process	6/1212	11/9983	0.000849254	0.0398088	0.0364472	Seita.5G104100/Seita.9G205600/Seita.9G205700/Seita.9G205800/Seita.1G089800/Seita.8G041200	6		Leaf.Cluster_C	sita04016	MAPK signaling pathway - plant	43/972	167/5494	0.00519057	0.0422661	0.0343436	Seita.4G185100/Seita.5G284300/Seita.5G284400/Seita.7G121700/Seita.8G141900/Seita.3G160800/Seita.3G164200/Seita.3G282000/Seita.2G024600/Seita.2G177500/Seita.2G437500/Seita.3G139000/Seita.3G164700/Seita.3G218800/Seita.5G164400/Seita.5G379400/Seita.5G395400/Seita.6G005300/Seita.7G021400/Seita.9G318200/Seita.9G460200/Seita.1G117500/Seita.3G206900/Seita.3G230400/Seita.3G369900/Seita.5G231200/Seita.5G2…	43
Root.Cluster_B	BP	GO:0019369	arachidonic acid metabolic process	6/1212	11/9983	0.000849254	0.0398088	0.0364472	Seita.9G205600/Seita.9G205700/Seita.9G205800/Seita.1G340800/Seita.8G041200/Seita.9G077900	6
Root.Cluster_B	BP	GO:0010565	regulation of cellular ketone metabolic process	19/1212	73/9983	0.000872763	0.0400758	0.0366917	Seita.2G187800/Seita.2G187900/Seita.2G300900/Seita.2G436000/Seita.4G021600/Seita.6G097400/Seita.6G125000/Seita.7G163500/Seita.7G306400/Seita.9G344800/Seita.1G116500/Seita.1G345400/Seita.1G347600/Seita.1G379700/Seita.3G015800/Seita.3G150700/Seita.3G183600/Seita.5G091900/Seita.9G417600	19
Root.Cluster_B	BP	GO:0071229	cellular response to acid chemical	78/1212	457/9983	0.000987551	0.0419172	0.0383775	Seita.2G033500/Seita.2G144900/Seita.2G145800/Seita.2G145900/Seita.2G156200/Seita.2G217500/Seita.3G010800/Seita.3G287100/Seita.4G181500/Seita.4G202100/Seita.4G235500/Seita.4G235600/Seita.5G043400/Seita.5G044000/Seita.5G093900/Seita.5G340800/Seita.5G353800/Seita.5G365500/Seita.5G404900/Seita.5G421200/Seita.5G451100/Seita.6G100500/Seita.7G141400/Seita.7G181300/Seita.7G312800/Seita.8G179000/Seita.9G0…	78
Root.Cluster_B	BP	GO:0009698	phenylpropanoid metabolic process	27/1212	120/9983	0.000989462	0.0419172	0.0383775	Seita.2G132800/Seita.3G142500/Seita.4G021600/Seita.4G121900/Seita.4G181500/Seita.5G386300/Seita.5G434700/Seita.6G093400/Seita.7G168500/Seita.9G186200/Seita.9G193900/Seita.9G344800/Seita.1G000700/Seita.1G062400/Seita.1G089800/Seita.3G218600/Seita.5G053000/Seita.5G053100/Seita.5G302300/Seita.6G091300/Seita.6G167900/Seita.7G022900/Seita.8G128800/Seita.9G214500/Seita.1G198900/Seita.1G230100/Seita.4G1…	27
Root.Cluster_B	BP	GO:0033559	unsaturated fatty acid metabolic process	7/1212	15/9983	0.00101437	0.0419172	0.0383775	Seita.9G205600/Seita.9G205700/Seita.9G205800/Seita.1G340800/Seita.8G041200/Seita.9G077900/Seita.2G389400	7
Root.Cluster_B	BP	GO:0072529	pyrimidine-containing compound catabolic process	7/1212	15/9983	0.00101437	0.0419172	0.0383775	Seita.1G123600/Seita.1G224700/Seita.2G133200/Seita.2G316000/Seita.5G353700/Seita.6G243800/Seita.8G233600	7
Root.Cluster_B	BP	GO:1900056	negative regulation of leaf senescence	7/1212	15/9983	0.00101437	0.0419172	0.0383775	Seita.3G287100/Seita.4G105900/Seita.2G072100/Seita.9G048400/Seita.9G048700/Seita.1G315600/Seita.4G106300	7
Root.Cluster_B	BP	GO:0071554	cell wall organization or biogenesis	71/1212	409/9983	0.00103072	0.0419172	0.0383775	Seita.1G112800/Seita.1G123400/Seita.1G268900/Seita.2G044900/Seita.2G199800/Seita.2G199900/Seita.2G382900/Seita.2G414200/Seita.3G096400/Seita.3G190400/Seita.3G337900/Seita.4G114200/Seita.4G181500/Seita.4G223900/Seita.4G259700/Seita.5G062700/Seita.5G238800/Seita.5G363400/Seita.5G434700/Seita.7G277800/Seita.7G318900/Seita.9G186200/Seita.9G233400/Seita.9G275700/Seita.9G275800/Seita.9G307100/Seita.9G3…	71
Root.Cluster_B	BP	GO:0009311	oligosaccharide metabolic process	19/1212	74/9983	0.00104327	0.0419172	0.0383775	Seita.1G112800/Seita.1G323700/Seita.2G396200/Seita.3G346000/Seita.6G144600/Seita.7G159600/Seita.8G053300/Seita.9G004800/Seita.9G350600/Seita.9G458800/Seita.2G188200/Seita.2G290900/Seita.3G227500/Seita.4G092100/Seita.6G240000/Seita.9G317500/Seita.9G328900/Seita.1G262000/Seita.8G136500	19
Root.Cluster_B	BP	GO:0042537	benzene-containing compound metabolic process	15/1212	53/9983	0.00118728	0.0468662	0.0429086	Seita.2G033500/Seita.5G434700/Seita.6G011600/Seita.6G012200/Seita.6G125000/Seita.7G168500/Seita.7G318900/Seita.9G157600/Seita.1G121100/Seita.3G150700/Seita.4G110900/Seita.4G227100/Seita.5G091900/Seita.8G128800/Seita.2G185300	15
Root.Cluster_B	BP	GO:0010150	leaf senescence	35/1212	171/9983	0.00121175	0.0470075	0.043038	Seita.1G166500/Seita.2G179700/Seita.2G300900/Seita.2G436000/Seita.2G436400/Seita.3G287100/Seita.3G379400/Seita.4G017200/Seita.4G054900/Seita.4G105900/Seita.4G163600/Seita.7G038400/Seita.7G124900/Seita.7G306400/Seita.9G352300/Seita.9G367800/Seita.9G417900/Seita.9G506400/Seita.1G379700/Seita.2G072100/Seita.4G247100/Seita.5G064300/Seita.5G284300/Seita.5G392200/Seita.7G038500/Seita.8G107800/Seita.9G0…	35
Root.Cluster_B	BP	GO:1900055	regulation of leaf senescence	14/1212	48/9983	0.00124401	0.0474409	0.0434348	Seita.2G436400/Seita.3G287100/Seita.3G379400/Seita.4G105900/Seita.7G124900/Seita.9G417900/Seita.2G072100/Seita.4G247100/Seita.5G284300/Seita.9G048400/Seita.9G048700/Seita.1G315600/Seita.3G160800/Seita.4G106300	14
Root.Cluster_B	BP	GO:0016051	carbohydrate biosynthetic process	43/1212	223/9983	0.00128571	0.0482143	0.0441428	Seita.1G123400/Seita.1G268900/Seita.1G323700/Seita.2G396200/Seita.3G096400/Seita.3G346000/Seita.4G223900/Seita.5G434700/Seita.6G087600/Seita.6G144600/Seita.9G004800/Seita.9G430600/Seita.9G430700/Seita.9G458800/Seita.2G188200/Seita.2G290900/Seita.2G415500/Seita.3G227500/Seita.4G092100/Seita.5G043700/Seita.5G437300/Seita.6G240000/Seita.7G098500/Seita.7G206700/Seita.7G239100/Seita.8G128800/Seita.8G1…	43
Root.Cluster_B	BP	GO:0009699	phenylpropanoid biosynthetic process	23/1212	99/9983	0.00145051	0.0499774	0.0457571	Seita.2G132800/Seita.3G142500/Seita.4G021600/Seita.4G181500/Seita.5G386300/Seita.5G434700/Seita.6G093400/Seita.7G168500/Seita.9G193900/Seita.9G344800/Seita.1G000700/Seita.1G062400/Seita.1G089800/Seita.3G218600/Seita.5G053000/Seita.5G053100/Seita.5G302300/Seita.6G167900/Seita.7G022900/Seita.8G128800/Seita.9G214500/Seita.1G230100/Seita.4G191500	23
Root.Cluster_B	BP	GO:0009867	jasmonic acid mediated signaling pathway	19/1212	76/9983	0.00147084	0.0499774	0.0457571	Seita.2G156200/Seita.2G217500/Seita.3G287100/Seita.5G044000/Seita.5G451100/Seita.9G437300/Seita.9G441600/Seita.9G518000/Seita.9G518100/Seita.1G113000/Seita.2G034500/Seita.5G331600/Seita.9G146300/Seita.9G251600/Seita.9G252500/Seita.9G357200/Seita.2G200400/Seita.3G146500/Seita.9G123000	19
Root.Cluster_B	BP	GO:0015893	drug transport	26/1212	117/9983	0.00147327	0.0499774	0.0457571	Seita.2G278500/Seita.2G324100/Seita.2G360800/Seita.3G357100/Seita.4G181500/Seita.5G124100/Seita.6G098800/Seita.7G043900/Seita.7G064100/Seita.9G193500/Seita.9G275500/Seita.9G275600/Seita.9G348500/Seita.1G270500/Seita.2G001400/Seita.5G243600/Seita.5G302300/Seita.5G333300/Seita.6G186200/Seita.7G040200/Seita.7G204900/Seita.9G001100/Seita.9G440400/Seita.9G510000/Seita.4G145400/Seita.4G273500	26
Root.Cluster_B	BP	GO:0007568	aging	40/1212	205/9983	0.00148221	0.0499774	0.0457571	Seita.1G166500/Seita.2G179700/Seita.2G300900/Seita.2G436000/Seita.2G436400/Seita.3G287100/Seita.3G379400/Seita.4G017200/Seita.4G054900/Seita.4G105900/Seita.4G155100/Seita.4G163600/Seita.5G104100/Seita.6G005100/Seita.7G038400/Seita.7G124900/Seita.7G306400/Seita.9G352300/Seita.9G367800/Seita.9G417900/Seita.9G506400/Seita.1G379700/Seita.2G072100/Seita.4G247100/Seita.5G064300/Seita.5G114900/Seita.5G2…	40
Root.Cluster_B	BP	GO:0005991	trehalose metabolic process	8/1212	20/9983	0.00151043	0.0499774	0.0457571	Seita.1G323700/Seita.2G396200/Seita.6G144600/Seita.9G350600/Seita.2G188200/Seita.4G092100/Seita.9G328900/Seita.1G262000	8
Root.Cluster_B	BP	GO:0006270	DNA replication initiation	8/1212	20/9983	0.00151043	0.0499774	0.0457571	Seita.2G400500/Seita.1G352100/Seita.5G192100/Seita.7G307400/Seita.8G007000/Seita.8G121500/Seita.9G256600/Seita.9G319400	8
Root.Cluster_B	BP	GO:0009410	response to xenobiotic stimulus	8/1212	20/9983	0.00151043	0.0499774	0.0457571	Seita.5G104100/Seita.9G205600/Seita.9G205700/Seita.9G205800/Seita.1G089800/Seita.3G217600/Seita.5G008900/Seita.8G041200	8
Root.Cluster_B	BP	GO:0017145	stem cell division	8/1212	20/9983	0.00151043	0.0499774	0.0457571	Seita.2G000900/Seita.2G390100/Seita.6G159900/Seita.1G021400/Seita.1G034400/Seita.1G317500/Seita.1G318900/Seita.4G101100	8
Root.Cluster_B	CC	GO:0005618	cell wall	106/1143	490/9955	3.13343e-11	4.42154e-09	4.14754e-09	Seita.1G092900/Seita.1G162700/Seita.1G162800/Seita.1G295700/Seita.1G323700/Seita.2G027000/Seita.2G069000/Seita.2G069100/Seita.2G133900/Seita.2G134000/Seita.2G396200/Seita.3G067600/Seita.3G146800/Seita.3G162000/Seita.3G177700/Seita.3G190400/Seita.3G315000/Seita.3G373000/Seita.4G021600/Seita.4G169700/Seita.4G255800/Seita.4G259700/Seita.5G062700/Seita.5G118700/Seita.5G448000/Seita.5G450000/Seita.5G4…	106
Root.Cluster_B	CC	GO:0030312	external encapsulating structure	106/1143	491/9955	3.56575e-11	4.42154e-09	4.14754e-09	Seita.1G092900/Seita.1G162700/Seita.1G162800/Seita.1G295700/Seita.1G323700/Seita.2G027000/Seita.2G069000/Seita.2G069100/Seita.2G133900/Seita.2G134000/Seita.2G396200/Seita.3G067600/Seita.3G146800/Seita.3G162000/Seita.3G177700/Seita.3G190400/Seita.3G315000/Seita.3G373000/Seita.4G021600/Seita.4G169700/Seita.4G255800/Seita.4G259700/Seita.5G062700/Seita.5G118700/Seita.5G448000/Seita.5G450000/Seita.5G4…	106
Root.Cluster_B	CC	GO:0031226	intrinsic component of plasma membrane	72/1143	331/9955	4.18938e-08	3.46322e-06	3.24861e-06	Seita.1G127700/Seita.1G256300/Seita.1G259900/Seita.2G044900/Seita.2G123300/Seita.2G260700/Seita.2G351200/Seita.3G077500/Seita.3G146800/Seita.3G225200/Seita.3G315000/Seita.4G169700/Seita.4G180100/Seita.4G257500/Seita.5G019000/Seita.5G043400/Seita.5G104100/Seita.5G124100/Seita.5G250400/Seita.5G448000/Seita.5G450000/Seita.6G101500/Seita.6G141000/Seita.6G153100/Seita.6G201700/Seita.7G096500/Seita.7G1…	72
Root.Cluster_B	CC	GO:0031012	extracellular matrix	13/1143	24/9955	4.16559e-07	2.58266e-05	2.42262e-05	Seita.1G162700/Seita.1G162800/Seita.6G037400/Seita.6G038400/Seita.6G038600/Seita.6G038700/Seita.6G038800/Seita.6G039000/Seita.6G039100/Seita.1G162600/Seita.6G038000/Seita.6G038900/Seita.6G039200	13
Root.Cluster_B	CC	GO:0031225	anchored component of membrane	36/1143	142/9955	2.88404e-06	0.000143048	0.000134184	Seita.1G127700/Seita.1G256300/Seita.2G044900/Seita.2G351200/Seita.3G146800/Seita.3G225200/Seita.3G315000/Seita.4G105900/Seita.4G169700/Seita.5G448000/Seita.5G450000/Seita.6G101500/Seita.6G153100/Seita.6G201700/Seita.7G184000/Seita.9G233400/Seita.J002700/Seita.1G213900/Seita.2G071100/Seita.2G263300/Seita.2G298100/Seita.2G375100/Seita.3G175800/Seita.5G343700/Seita.5G392200/Seita.5G446300/Seita.9G08…	36
Root.Cluster_B	CC	GO:0005871	kinesin complex	20/1143	59/9955	4.58593e-06	0.000189552	0.000177805	Seita.1G360100/Seita.3G174700/Seita.5G055100/Seita.6G243300/Seita.7G058500/Seita.9G177700/Seita.9G284500/Seita.J002300/Seita.1G052200/Seita.1G317100/Seita.2G207800/Seita.2G406300/Seita.3G151900/Seita.3G251500/Seita.5G179700/Seita.5G218400/Seita.8G146100/Seita.9G449500/Seita.3G217300/Seita.9G193600	20
Root.Cluster_B	CC	GO:0005576	extracellular region	72/1143	384/9955	1.42961e-05	0.000506491	0.000475104	Seita.1G162700/Seita.1G162800/Seita.1G295700/Seita.1G323700/Seita.2G033500/Seita.2G044900/Seita.2G396200/Seita.3G067600/Seita.3G097400/Seita.3G177700/Seita.3G315000/Seita.4G082600/Seita.5G104100/Seita.5G448000/Seita.5G450000/Seita.6G037400/Seita.6G038400/Seita.6G038600/Seita.6G038700/Seita.6G038800/Seita.6G039000/Seita.6G039100/Seita.7G038400/Seita.8G230000/Seita.9G157600/Seita.9G339100/Seita.9G4…	72
Root.Cluster_B	CC	GO:0046658	anchored component of plasma membrane	30/1143	119/9955	2.14083e-05	0.000663656	0.00062253	Seita.1G127700/Seita.1G256300/Seita.2G044900/Seita.2G351200/Seita.3G146800/Seita.3G225200/Seita.3G315000/Seita.4G169700/Seita.5G448000/Seita.5G450000/Seita.6G101500/Seita.6G153100/Seita.6G201700/Seita.9G233400/Seita.J002700/Seita.1G213900/Seita.2G071100/Seita.2G263300/Seita.2G298100/Seita.2G375100/Seita.3G175800/Seita.5G343700/Seita.5G392200/Seita.9G088400/Seita.2G154700/Seita.3G008300/Seita.3G26…	30
Root.Cluster_B	CC	GO:0009505	plant-type cell wall	45/1143	220/9955	7.25905e-05	0.00200027	0.00187631	Seita.1G092900/Seita.2G027000/Seita.2G069000/Seita.2G069100/Seita.3G146800/Seita.3G162000/Seita.3G190400/Seita.4G021600/Seita.4G169700/Seita.4G255800/Seita.4G259700/Seita.6G153100/Seita.7G181300/Seita.7G277800/Seita.8G230000/Seita.9G125400/Seita.9G186200/Seita.9G340500/Seita.9G344800/Seita.9G422700/Seita.9G437100/Seita.1G213900/Seita.3G101400/Seita.3G240700/Seita.4G271100/Seita.5G053000/Seita.5G0…	45
Root.Cluster_B	CC	GO:0005887	integral component of plasma membrane	42/1143	211/9955	0.000233455	0.00578968	0.0054309	Seita.1G259900/Seita.2G123300/Seita.2G260700/Seita.3G077500/Seita.4G180100/Seita.4G257500/Seita.5G019000/Seita.5G043400/Seita.5G104100/Seita.5G124100/Seita.5G250400/Seita.6G141000/Seita.7G096500/Seita.7G162400/Seita.7G189600/Seita.8G085300/Seita.8G179000/Seita.9G193500/Seita.9G238400/Seita.9G268100/Seita.1G067000/Seita.1G116500/Seita.1G286600/Seita.2G049100/Seita.2G123000/Seita.3G043400/Seita.3G0…	42
Root.Cluster_B	CC	GO:0005875	microtubule associated complex	21/1143	83/9955	0.000337806	0.007616	0.00714404	Seita.1G360100/Seita.3G174700/Seita.5G055100/Seita.5G325800/Seita.6G243300/Seita.7G058500/Seita.9G177700/Seita.9G284500/Seita.J002300/Seita.1G052200/Seita.1G317100/Seita.2G207800/Seita.2G406300/Seita.3G151900/Seita.3G251500/Seita.5G179700/Seita.5G218400/Seita.8G146100/Seita.9G449500/Seita.3G217300/Seita.9G193600	21
Root.Cluster_B	CC	GO:0072686	mitotic spindle	7/1143	14/9955	0.000426801	0.00882056	0.00827395	Seita.5G325800/Seita.2G207800/Seita.3G151900/Seita.8G146100/Seita.9G319400/Seita.1G106800/Seita.3G217300	7
Root.Cluster_B	CC	GO:0005775	vacuolar lumen	6/1143	12/9955	0.00113134	0.0215825	0.0202451	Seita.6G098800/Seita.9G483300/Seita.2G269700/Seita.5G280500/Seita.5G402400/Seita.8G136500	6
Root.Cluster_B	CC	GO:0098687	chromosomal region	21/1143	94/9955	0.00191401	0.0339052	0.0318042	Seita.1G103600/Seita.2G287100/Seita.3G198000/Seita.3G227400/Seita.4G066000/Seita.5G325800/Seita.5G370600/Seita.9G450000/Seita.9G491000/Seita.1G052600/Seita.2G207800/Seita.2G217400/Seita.3G151900/Seita.4G066200/Seita.5G114900/Seita.5G179700/Seita.5G370700/Seita.8G146100/Seita.9G233200/Seita.9G256600/Seita.9G453400	21
Root.Cluster_B	CC	GO:0000325	plant-type vacuole	39/1143	214/9955	0.00220738	0.0364953	0.0342337	Seita.1G162700/Seita.1G162800/Seita.1G259900/Seita.2G412200/Seita.3G375800/Seita.4G155100/Seita.5G340800/Seita.6G005100/Seita.6G037400/Seita.6G038400/Seita.6G038600/Seita.6G038700/Seita.6G038800/Seita.6G039000/Seita.6G039100/Seita.7G038400/Seita.7G076800/Seita.7G181300/Seita.7G189600/Seita.1G114900/Seita.1G116500/Seita.1G117600/Seita.1G162600/Seita.2G352700/Seita.5G007400/Seita.5G176800/Seita.6G0…	39
Root.Cluster_B	MF	GO:0004497	monooxygenase activity	42/1068	167/8539	5.06088e-06	0.00264684	0.002328	Seita.1G265100/Seita.1G367300/Seita.2G003500/Seita.2G145700/Seita.2G145800/Seita.2G145900/Seita.2G283800/Seita.3G201500/Seita.3G339800/Seita.4G036200/Seita.4G145700/Seita.4G216300/Seita.4G235500/Seita.4G235600/Seita.5G139200/Seita.5G386300/Seita.6G100500/Seita.6G132000/Seita.7G139200/Seita.7G197000/Seita.7G204200/Seita.8G014200/Seita.8G068800/Seita.8G069000/Seita.8G136000/Seita.8G166500/Seita.9G0…	42
Root.Cluster_B	MF	GO:0003777	microtubule motor activity	20/1068	59/8539	1.66396e-05	0.00317387	0.00279155	Seita.1G360100/Seita.3G174700/Seita.5G055100/Seita.6G243300/Seita.7G058500/Seita.9G177700/Seita.9G284500/Seita.J002300/Seita.1G052200/Seita.1G317100/Seita.2G207800/Seita.2G406300/Seita.3G151900/Seita.3G251500/Seita.5G179700/Seita.5G218400/Seita.8G146100/Seita.9G449500/Seita.3G217300/Seita.9G193600	20
Root.Cluster_B	MF	GO:1990939	ATP-dependent microtubule motor activity	11/1068	22/8539	2.10875e-05	0.00317387	0.00279155	Seita.1G360100/Seita.5G055100/Seita.6G243300/Seita.7G058500/Seita.9G177700/Seita.9G284500/Seita.J002300/Seita.1G317100/Seita.3G151900/Seita.5G218400/Seita.9G449500	11
Root.Cluster_B	MF	GO:0004674	protein serine/threonine kinase activity	87/1068	459/8539	3.20103e-05	0.00317387	0.00279155	Seita.1G058700/Seita.1G060800/Seita.1G094200/Seita.2G000900/Seita.2G150000/Seita.2G285400/Seita.2G390100/Seita.3G003200/Seita.3G021000/Seita.3G023800/Seita.3G136100/Seita.3G145200/Seita.3G197500/Seita.3G293300/Seita.3G374200/Seita.4G126700/Seita.4G147500/Seita.4G186200/Seita.5G031200/Seita.5G093900/Seita.5G403800/Seita.5G403900/Seita.7G100500/Seita.7G128900/Seita.7G304300/Seita.7G312800/Seita.9G0…	87
Root.Cluster_B	MF	GO:0016791	phosphatase activity	45/1068	197/8539	3.36786e-05	0.00317387	0.00279155	Seita.1G116700/Seita.1G157400/Seita.1G323700/Seita.2G150000/Seita.2G286900/Seita.2G396200/Seita.3G131200/Seita.3G165800/Seita.5G299700/Seita.5G386400/Seita.6G144600/Seita.7G307600/Seita.7G324000/Seita.8G006600/Seita.9G101700/Seita.9G205600/Seita.9G205700/Seita.9G205800/Seita.9G458800/Seita.9G475300/Seita.9G475400/Seita.1G102100/Seita.1G130300/Seita.1G159200/Seita.1G288600/Seita.1G288700/Seita.1G3…	45
Root.Cluster_B	MF	GO:0008574	ATP-dependent microtubule motor activity, plus-end-directed	9/1068	16/8539	3.64115e-05	0.00317387	0.00279155	Seita.1G360100/Seita.6G243300/Seita.7G058500/Seita.9G177700/Seita.9G284500/Seita.1G317100/Seita.3G151900/Seita.5G218400/Seita.9G449500	9
Root.Cluster_B	MF	GO:0003774	motor activity	20/1068	64/8539	6.3123e-05	0.00471619	0.00414808	Seita.1G360100/Seita.3G174700/Seita.5G055100/Seita.6G243300/Seita.7G058500/Seita.9G177700/Seita.9G284500/Seita.J002300/Seita.1G052200/Seita.1G317100/Seita.2G207800/Seita.2G406300/Seita.3G151900/Seita.3G251500/Seita.5G179700/Seita.5G218400/Seita.8G146100/Seita.9G449500/Seita.3G217300/Seita.9G193600	20
Root.Cluster_B	MF	GO:0005372	water transmembrane transporter activity	13/1068	34/8539	0.000125046	0.00666038	0.00585808	Seita.1G259900/Seita.2G123300/Seita.4G180100/Seita.7G189600/Seita.8G085300/Seita.9G193500/Seita.9G268100/Seita.2G123000/Seita.3G073300/Seita.4G098700/Seita.5G007400/Seita.4G160700/Seita.9G571600	13
Root.Cluster_B	MF	GO:0015250	water channel activity	13/1068	34/8539	0.000125046	0.00666038	0.00585808	Seita.1G259900/Seita.2G123300/Seita.4G180100/Seita.7G189600/Seita.8G085300/Seita.9G193500/Seita.9G268100/Seita.2G123000/Seita.3G073300/Seita.4G098700/Seita.5G007400/Seita.4G160700/Seita.9G571600	13
Root.Cluster_B	MF	GO:0016405	CoA-ligase activity	10/1068	22/8539	0.000140085	0.00666038	0.00585808	Seita.3G051400/Seita.6G093400/Seita.8G049100/Seita.9G554000/Seita.1G177400/Seita.6G167900/Seita.8G028000/Seita.9G306300/Seita.9G431700/Seita.4G191500	10
Root.Cluster_B	MF	GO:0019203	carbohydrate phosphatase activity	10/1068	22/8539	0.000140085	0.00666038	0.00585808	Seita.1G323700/Seita.2G396200/Seita.9G458800/Seita.2G188200/Seita.3G227500/Seita.4G092100/Seita.9G315500/Seita.9G328900/Seita.1G262000/Seita.6G128700	10
Root.Cluster_B	MF	GO:0042578	phosphoric ester hydrolase activity	47/1068	224/8539	0.000205612	0.00896125	0.00788179	Seita.1G116700/Seita.1G157400/Seita.1G323700/Seita.2G150000/Seita.2G286900/Seita.2G396200/Seita.3G131200/Seita.3G165800/Seita.5G299700/Seita.5G386400/Seita.6G144600/Seita.7G307600/Seita.7G324000/Seita.8G006600/Seita.9G101700/Seita.9G173100/Seita.9G205600/Seita.9G205700/Seita.9G205800/Seita.9G458800/Seita.9G475300/Seita.9G475400/Seita.1G102100/Seita.1G130300/Seita.1G159200/Seita.1G213900/Seita.1G2…	47
Root.Cluster_B	MF	GO:0016705	oxidoreductase activity, acting on paired donors, with incorporation or reduction of molecular oxygen	36/1068	162/8539	0.000354949	0.0142799	0.0125597	Seita.1G265100/Seita.2G145700/Seita.2G145800/Seita.2G145900/Seita.2G283800/Seita.3G339800/Seita.4G015700/Seita.4G145700/Seita.4G216300/Seita.4G223200/Seita.4G235500/Seita.4G235600/Seita.5G139200/Seita.5G157700/Seita.5G323400/Seita.5G386300/Seita.5G404900/Seita.6G100500/Seita.6G132000/Seita.7G139200/Seita.7G197000/Seita.8G014200/Seita.8G068800/Seita.8G069000/Seita.8G136000/Seita.8G166500/Seita.9G0…	36
Root.Cluster_B	MF	GO:0005516	calmodulin binding	29/1068	123/8539	0.000466633	0.0173812	0.0152875	Seita.1G021900/Seita.1G127700/Seita.2G260700/Seita.3G197500/Seita.5G340800/Seita.5G421200/Seita.7G141400/Seita.7G312800/Seita.9G019600/Seita.9G135600/Seita.9G303400/Seita.9G555600/Seita.1G067000/Seita.1G102100/Seita.2G347200/Seita.2G357800/Seita.5G231500/Seita.5G294600/Seita.5G384200/Seita.6G055400/Seita.6G068500/Seita.6G214700/Seita.7G213200/Seita.8G025400/Seita.8G051100/Seita.8G051500/Seita.9G1…	29
Root.Cluster_B	MF	GO:0043492	ATPase activity, coupled to movement of substances	27/1068	112/8539	0.000498505	0.0173812	0.0152875	Seita.2G179600/Seita.2G260700/Seita.3G260100/Seita.4G181500/Seita.5G221500/Seita.5G226500/Seita.5G287400/Seita.6G098800/Seita.6G136400/Seita.6G136500/Seita.7G032000/Seita.7G076800/Seita.9G207500/Seita.1G039400/Seita.1G067000/Seita.3G116800/Seita.4G140700/Seita.5G146100/Seita.5G302300/Seita.6G135900/Seita.6G214700/Seita.6G234600/Seita.7G035300/Seita.7G040200/Seita.8G025400/Seita.9G001100/Seita.9G4…	27
Root.Cluster_B	MF	GO:0004553	hydrolase activity, hydrolyzing O-glycosyl compounds	46/1068	228/8539	0.000598239	0.0187898	0.0165264	Seita.1G323700/Seita.2G044900/Seita.2G396200/Seita.3G225200/Seita.3G315000/Seita.4G114200/Seita.4G169700/Seita.4G255800/Seita.5G022400/Seita.5G448000/Seita.5G450000/Seita.5G465600/Seita.7G134900/Seita.7G150100/Seita.7G150700/Seita.7G181300/Seita.8G053300/Seita.8G230000/Seita.9G091600/Seita.9G125400/Seita.9G350600/Seita.9G422700/Seita.1G098300/Seita.2G188200/Seita.2G263300/Seita.2G279000/Seita.3G0…	46
Root.Cluster_B	MF	GO:0016709	oxidoreductase activity, acting on paired donors, with incorporation or reduction of molecular oxygen, NAD(P)H as one donor, and incorporation of one atom of oxygen	25/1068	102/8539	0.000610757	0.0187898	0.0165264	Seita.2G145700/Seita.2G145800/Seita.2G145900/Seita.2G283800/Seita.3G339800/Seita.4G145700/Seita.4G216300/Seita.4G235500/Seita.4G235600/Seita.5G139200/Seita.6G100500/Seita.6G132000/Seita.7G139200/Seita.8G014200/Seita.8G068800/Seita.8G069000/Seita.8G136000/Seita.8G166500/Seita.9G021400/Seita.9G193900/Seita.9G241000/Seita.9G281800/Seita.2G219700/Seita.6G089500/Seita.9G288700	25
Root.Cluster_B	MF	GO:0016798	hydrolase activity, acting on glycosyl bonds	49/1068	249/8539	0.000725879	0.0205428	0.0180682	Seita.1G323700/Seita.2G044900/Seita.2G133200/Seita.2G396200/Seita.3G225200/Seita.3G315000/Seita.4G114200/Seita.4G169700/Seita.4G255800/Seita.5G022400/Seita.5G448000/Seita.5G450000/Seita.5G465600/Seita.6G243800/Seita.7G134900/Seita.7G150100/Seita.7G150700/Seita.7G181300/Seita.8G053300/Seita.8G230000/Seita.9G091600/Seita.9G125400/Seita.9G350600/Seita.9G422700/Seita.1G098300/Seita.2G188200/Seita.2G2…	49
Root.Cluster_B	MF	GO:0004675	transmembrane receptor protein serine/threonine kinase activity	26/1068	109/8539	0.000746295	0.0205428	0.0180682	Seita.1G058700/Seita.1G060800/Seita.1G094200/Seita.2G285400/Seita.3G021000/Seita.4G147500/Seita.4G186200/Seita.5G403800/Seita.5G403900/Seita.7G128900/Seita.9G483300/Seita.9G553100/Seita.1G053800/Seita.1G339100/Seita.2G269700/Seita.4G087500/Seita.5G192600/Seita.5G267900/Seita.6G107700/Seita.6G172800/Seita.7G283000/Seita.9G113500/Seita.9G394900/Seita.1G267800/Seita.5G280500/Seita.7G199600	26
Root.Cluster_B	MF	GO:0008238	exopeptidase activity	17/1068	61/8539	0.000971568	0.023044	0.0202681	Seita.1G064000/Seita.1G166500/Seita.3G177700/Seita.5G104100/Seita.5G370200/Seita.8G097000/Seita.9G262900/Seita.9G340500/Seita.9G376900/Seita.9G377000/Seita.9G377100/Seita.1G063900/Seita.1G064100/Seita.5G157800/Seita.7G122100/Seita.8G134300/Seita.9G262800	17
Root.Cluster_B	MF	GO:0004805	trehalose-phosphatase activity	6/1068	11/8539	0.00099675	0.023044	0.0202681	Seita.1G323700/Seita.2G396200/Seita.2G188200/Seita.4G092100/Seita.9G328900/Seita.1G262000	6
Root.Cluster_B	MF	GO:0042626	ATPase-coupled transmembrane transporter activity	25/1068	106/8539	0.00111365	0.023044	0.0202681	Seita.2G179600/Seita.2G260700/Seita.3G260100/Seita.4G181500/Seita.5G221500/Seita.5G226500/Seita.5G287400/Seita.6G098800/Seita.6G136400/Seita.6G136500/Seita.7G032000/Seita.7G076800/Seita.9G207500/Seita.1G039400/Seita.1G067000/Seita.4G140700/Seita.5G146100/Seita.5G302300/Seita.6G135900/Seita.6G214700/Seita.6G234600/Seita.7G035300/Seita.7G040200/Seita.8G025400/Seita.9G001100	25
Root.Cluster_B	MF	GO:0008810	cellulase activity	7/1068	15/8539	0.00121288	0.023044	0.0202681	Seita.3G315000/Seita.4G114200/Seita.5G022400/Seita.5G448000/Seita.5G450000/Seita.3G175800/Seita.3G263800	7
Root.Cluster_B	MF	GO:0034485	phosphatidylinositol-3,4,5-trisphosphate 5-phosphatase activity	7/1068	15/8539	0.00121288	0.023044	0.0202681	Seita.3G165800/Seita.7G307600/Seita.8G006600/Seita.9G475400/Seita.1G322900/Seita.3G062800/Seita.5G296200	7
Root.Cluster_B	MF	GO:0034594	phosphatidylinositol trisphosphate phosphatase activity	7/1068	15/8539	0.00121288	0.023044	0.0202681	Seita.3G165800/Seita.7G307600/Seita.8G006600/Seita.9G475400/Seita.1G322900/Seita.3G062800/Seita.5G296200	7
Root.Cluster_B	MF	GO:0050734	hydroxycinnamoyltransferase activity	7/1068	15/8539	0.00121288	0.023044	0.0202681	Seita.3G028200/Seita.5G434700/Seita.7G047600/Seita.2G293600/Seita.2G293700/Seita.8G128800/Seita.1G230100	7
Root.Cluster_B	MF	GO:0004439	phosphatidylinositol-4,5-bisphosphate 5-phosphatase activity	8/1068	19/8539	0.00123371	0.023044	0.0202681	Seita.3G165800/Seita.7G307600/Seita.8G006600/Seita.9G475400/Seita.1G322900/Seita.3G062800/Seita.5G296200/Seita.5G311400	8
Root.Cluster_B	MF	GO:0106019	phosphatidylinositol-4,5-bisphosphate phosphatase activity	8/1068	19/8539	0.00123371	0.023044	0.0202681	Seita.3G165800/Seita.7G307600/Seita.8G006600/Seita.9G475400/Seita.1G322900/Seita.3G062800/Seita.5G296200/Seita.5G311400	8
Root.Cluster_B	MF	GO:0005509	calcium ion binding	22/1068	90/8539	0.00131688	0.0233927	0.0205749	Seita.1G107200/Seita.1G127700/Seita.1G263400/Seita.3G290500/Seita.3G375800/Seita.4G257500/Seita.5G456800/Seita.8G026400/Seita.8G176000/Seita.9G173100/Seita.9G415800/Seita.9G427100/Seita.9G454300/Seita.1G130300/Seita.1G213900/Seita.3G135500/Seita.5G456900/Seita.7G149600/Seita.9G333800/Seita.9G510000/Seita.3G079700/Seita.3G261400	22
Root.Cluster_B	MF	GO:0019199	transmembrane receptor protein kinase activity	27/1068	119/8539	0.00134184	0.0233927	0.0205749	Seita.1G058700/Seita.1G060800/Seita.1G094200/Seita.2G285400/Seita.3G021000/Seita.4G147500/Seita.4G186200/Seita.5G403800/Seita.5G403900/Seita.7G128900/Seita.9G483300/Seita.9G553100/Seita.1G053800/Seita.1G339100/Seita.2G269700/Seita.4G087500/Seita.5G192600/Seita.5G267900/Seita.6G107700/Seita.6G166900/Seita.6G172800/Seita.7G283000/Seita.9G113500/Seita.9G394900/Seita.1G267800/Seita.5G280500/Seita.7G1…	27
Root.Cluster_B	MF	GO:0070008	serine-type exopeptidase activity	10/1068	28/8539	0.00140357	0.0236795	0.0208271	Seita.5G370200/Seita.8G097000/Seita.9G262900/Seita.9G340500/Seita.9G376900/Seita.9G377000/Seita.9G377100/Seita.5G157800/Seita.8G134300/Seita.9G262800	10
Root.Cluster_B	MF	GO:0016878	acid-thiol ligase activity	9/1068	24/8539	0.00163504	0.0267227	0.0235038	Seita.3G051400/Seita.6G093400/Seita.8G049100/Seita.9G554000/Seita.1G177400/Seita.6G167900/Seita.8G028000/Seita.9G431700/Seita.4G191500	9
Root.Cluster_B	MF	GO:0022804	active transmembrane transporter activity	48/1068	253/8539	0.00183852	0.0291378	0.0256279	Seita.2G000400/Seita.2G179600/Seita.2G260700/Seita.2G352200/Seita.3G260100/Seita.3G357100/Seita.4G181500/Seita.5G221500/Seita.5G226500/Seita.5G287400/Seita.6G098800/Seita.6G136400/Seita.6G136500/Seita.7G032000/Seita.7G076800/Seita.9G187300/Seita.9G193500/Seita.9G207500/Seita.9G483100/Seita.1G039400/Seita.1G057900/Seita.1G067000/Seita.1G286600/Seita.2G176800/Seita.2G368200/Seita.3G209900/Seita.3G4…	48
Root.Cluster_B	MF	GO:0034595	phosphatidylinositol phosphate 5-phosphatase activity	8/1068	21/8539	0.00264054	0.0406177	0.035725	Seita.3G165800/Seita.7G307600/Seita.8G006600/Seita.9G475400/Seita.1G322900/Seita.3G062800/Seita.5G296200/Seita.5G311400	8
Root.Cluster_B	MF	GO:0004888	transmembrane signaling receptor activity	29/1068	138/8539	0.00312812	0.0467431	0.0411125	Seita.1G058700/Seita.1G060800/Seita.1G094200/Seita.2G285400/Seita.3G021000/Seita.4G147500/Seita.4G186200/Seita.5G340800/Seita.5G403800/Seita.5G403900/Seita.7G128900/Seita.9G483300/Seita.9G553100/Seita.1G053800/Seita.1G113000/Seita.1G339100/Seita.2G269700/Seita.4G087500/Seita.5G192600/Seita.5G267900/Seita.6G107700/Seita.6G166900/Seita.6G172800/Seita.7G283000/Seita.9G113500/Seita.9G394900/Seita.1G2…	29
Root.Cluster_C	BP	GO:0019748	secondary metabolic process	127/2605	305/9983	1.47934e-09	3.71018e-06	3.47411e-06	Seita.2G154400/Seita.4G226700/Seita.5G053200/Seita.6G243900/Seita.9G061600/Seita.3G189100/Seita.3G077100/Seita.9G117700/Seita.9G242900/Seita.2G104900/Seita.7G298100/Seita.2G140600/Seita.3G394400/Seita.5G090200/Seita.6G061400/Seita.7G096800/Seita.8G252500/Seita.1G281500/Seita.9G257000/Seita.1G245800/Seita.2G147600/Seita.2G219600/Seita.2G224300/Seita.4G232000/Seita.9G041900/Seita.9G303200/Seita.2G1…	127
Root.Cluster_C	BP	GO:0006833	water transport	29/2605	45/9983	7.00112e-08	5.85294e-05	5.48053e-05	Seita.1G318800/Seita.5G469800/Seita.7G170200/Seita.9G541300/Seita.3G246700/Seita.4G089800/Seita.5G007500/Seita.3G082100/Seita.1G025100/Seita.2G123200/Seita.1G372300/Seita.9G208400/Seita.1G259900/Seita.2G123300/Seita.4G021600/Seita.4G180100/Seita.7G189600/Seita.8G085300/Seita.9G193500/Seita.9G268100/Seita.9G344800/Seita.2G123000/Seita.3G073300/Seita.3G101400/Seita.4G098700/Seita.5G007400/Seita.9G0…	29
Root.Cluster_C	BP	GO:0042044	fluid transport	29/2605	45/9983	7.00112e-08	5.85294e-05	5.48053e-05	Seita.1G318800/Seita.5G469800/Seita.7G170200/Seita.9G541300/Seita.3G246700/Seita.4G089800/Seita.5G007500/Seita.3G082100/Seita.1G025100/Seita.2G123200/Seita.1G372300/Seita.9G208400/Seita.1G259900/Seita.2G123300/Seita.4G021600/Seita.4G180100/Seita.7G189600/Seita.8G085300/Seita.9G193500/Seita.9G268100/Seita.9G344800/Seita.2G123000/Seita.3G073300/Seita.3G101400/Seita.4G098700/Seita.5G007400/Seita.9G0…	29
Root.Cluster_C	BP	GO:0042446	hormone biosynthetic process	86/2605	200/9983	1.23334e-07	7.73304e-05	7.241e-05	Seita.3G114000/Seita.5G136200/Seita.9G061600/Seita.9G262400/Seita.9G480100/Seita.2G231300/Seita.9G117700/Seita.9G184100/Seita.2G104900/Seita.6G155100/Seita.2G225400/Seita.7G132100/Seita.1G245800/Seita.6G011900/Seita.8G008100/Seita.9G173500/Seita.2G105100/Seita.9G456500/Seita.5G044300/Seita.7G126900/Seita.1G275400/Seita.2G201000/Seita.2G225500/Seita.2G229900/Seita.2G334600/Seita.3G116300/Seita.4G0…	86
Root.Cluster_C	BP	GO:0048878	chemical homeostasis	127/2605	327/9983	1.97756e-07	9.91945e-05	9.28829e-05	Seita.2G090500/Seita.3G114000/Seita.9G480100/Seita.9G558000/Seita.2G372300/Seita.3G170600/Seita.3G189100/Seita.5G085100/Seita.1G344700/Seita.4G269800/Seita.3G260800/Seita.3G312900/Seita.9G090100/Seita.1G155500/Seita.1G179000/Seita.1G319500/Seita.2G397300/Seita.7G096800/Seita.8G114700/Seita.1G281500/Seita.7G132100/Seita.5G429600/Seita.9G173500/Seita.1G141800/Seita.3G193100/Seita.6G150900/Seita.9G0…	127
Root.Cluster_C	BP	GO:0042445	hormone metabolic process	114/2605	288/9983	2.67393e-07	0.00011177	0.000104659	Seita.3G114000/Seita.5G136200/Seita.9G061600/Seita.9G262400/Seita.9G480100/Seita.2G231300/Seita.2G372300/Seita.7G194300/Seita.9G117700/Seita.9G184100/Seita.2G104900/Seita.6G155100/Seita.2G225400/Seita.5G447700/Seita.7G132100/Seita.1G245800/Seita.6G011900/Seita.7G194800/Seita.8G008100/Seita.9G173500/Seita.2G105100/Seita.9G456500/Seita.5G044300/Seita.6G073000/Seita.7G126900/Seita.1G275400/Seita.2G2…	114
Root.Cluster_C	BP	GO:0032787	monocarboxylic acid metabolic process	151/2605	411/9983	7.92881e-07	0.000284078	0.000266003	Seita.5G127500/Seita.5G136200/Seita.9G061600/Seita.9G184100/Seita.2G104900/Seita.7G205900/Seita.5G014400/Seita.5G087500/Seita.6G036000/Seita.7G096800/Seita.7G230800/Seita.8G243500/Seita.5G065300/Seita.1G245800/Seita.6G011900/Seita.7G319100/Seita.9G041900/Seita.2G105100/Seita.4G011500/Seita.4G226900/Seita.6G219700/Seita.9G386300/Seita.4G119800/Seita.1G047500/Seita.1G069500/Seita.2G334600/Seita.3G0…	151
Root.Cluster_C	BP	GO:0010817	regulation of hormone levels	143/2605	390/9983	1.77161e-06	0.000519926	0.000486844	Seita.1G240800/Seita.3G114000/Seita.5G136200/Seita.9G061600/Seita.9G187800/Seita.9G262400/Seita.9G480100/Seita.2G231300/Seita.2G372300/Seita.7G194300/Seita.9G117700/Seita.9G184100/Seita.2G104900/Seita.6G155100/Seita.2G207600/Seita.2G225400/Seita.4G048100/Seita.5G447700/Seita.9G520700/Seita.7G132100/Seita.1G245800/Seita.5G429600/Seita.6G011900/Seita.7G194800/Seita.8G008100/Seita.9G173500/Seita.2G1…	143
Root.Cluster_C	BP	GO:0009834	plant-type secondary cell wall biogenesis	38/2605	73/9983	1.86576e-06	0.000519926	0.000486844	Seita.2G356200/Seita.2G209100/Seita.3G205300/Seita.6G086100/Seita.2G080900/Seita.7G264000/Seita.9G560500/Seita.1G080900/Seita.1G309600/Seita.3G046000/Seita.3G136800/Seita.3G217800/Seita.4G115200/Seita.5G242700/Seita.5G319100/Seita.6G003700/Seita.8G252500/Seita.9G227400/Seita.1G281500/Seita.3G003000/Seita.7G010400/Seita.5G437200/Seita.6G154200/Seita.4G003000/Seita.7G220500/Seita.9G345100/Seita.2G2…	38
Root.Cluster_C	BP	GO:0055088	lipid homeostasis	30/2605	53/9983	2.34465e-06	0.000588039	0.000550624	Seita.3G114000/Seita.9G480100/Seita.3G312900/Seita.7G132100/Seita.9G173500/Seita.2G229900/Seita.3G116300/Seita.7G199400/Seita.7G318000/Seita.1G063600/Seita.8G027000/Seita.2G277900/Seita.3G201500/Seita.3G243800/Seita.5G139200/Seita.5G232500/Seita.7G204200/Seita.8G166500/Seita.9G021400/Seita.9G205600/Seita.9G205700/Seita.9G205800/Seita.1G166600/Seita.3G243500/Seita.3G243700/Seita.4G194200/Seita.4G2…	30
Root.Cluster_C	BP	GO:0030001	metal ion transport	95/2605	243/9983	4.90173e-06	0.00103634	0.000970403	Seita.7G069900/Seita.7G194000/Seita.9G168300/Seita.2G090500/Seita.2G432200/Seita.7G111600/Seita.9G558000/Seita.1G175000/Seita.5G085100/Seita.3G208100/Seita.4G269800/Seita.7G156200/Seita.3G312900/Seita.4G260900/Seita.7G230400/Seita.9G003100/Seita.9G090100/Seita.2G217600/Seita.2G397300/Seita.5G192900/Seita.5G333000/Seita.7G235500/Seita.8G114700/Seita.5G024400/Seita.7G214000/Seita.9G366600/Seita.1G0…	95
Root.Cluster_C	BP	GO:2000652	regulation of secondary cell wall biogenesis	18/2605	26/9983	4.95858e-06	0.00103634	0.000970403	Seita.3G205300/Seita.9G560500/Seita.1G309600/Seita.3G136800/Seita.4G115200/Seita.5G242700/Seita.6G003700/Seita.1G281500/Seita.3G003000/Seita.6G154200/Seita.4G003000/Seita.7G220500/Seita.9G345100/Seita.2G200200/Seita.9G557600/Seita.2G199800/Seita.2G199900/Seita.5G363400	18
Root.Cluster_C	BP	GO:0005975	carbohydrate metabolic process	166/2605	474/9983	6.58822e-06	0.00111447	0.00104355	Seita.2G356200/Seita.2G191300/Seita.2G193300/Seita.2G209100/Seita.5G053200/Seita.2G080900/Seita.3G056900/Seita.7G264000/Seita.9G260200/Seita.1G098500/Seita.1G123500/Seita.1G080900/Seita.1G179000/Seita.2G351400/Seita.2G384400/Seita.3G046000/Seita.3G217800/Seita.3G253500/Seita.5G237300/Seita.5G319100/Seita.6G003700/Seita.7G230800/Seita.9G227400/Seita.9G448500/Seita.5G065300/Seita.9G186600/Seita.3G0…	166
Root.Cluster_C	BP	GO:0071669	plant-type cell wall organization or biogenesis	99/2605	257/9983	6.5948e-06	0.00111447	0.00104355	Seita.2G356200/Seita.9G490100/Seita.2G209100/Seita.3G205300/Seita.5G127500/Seita.6G086100/Seita.9G537300/Seita.2G080900/Seita.5G079000/Seita.7G196300/Seita.7G264000/Seita.9G060800/Seita.9G560500/Seita.3G246700/Seita.1G123500/Seita.1G080900/Seita.1G309600/Seita.3G046000/Seita.3G136800/Seita.3G217800/Seita.4G115200/Seita.4G230900/Seita.5G242700/Seita.5G319100/Seita.6G003700/Seita.7G207900/Seita.8G2…	99
Root.Cluster_C	BP	GO:0009832	plant-type cell wall biogenesis	63/2605	147/9983	6.66546e-06	0.00111447	0.00104355	Seita.2G356200/Seita.9G490100/Seita.2G209100/Seita.3G205300/Seita.5G127500/Seita.6G086100/Seita.2G080900/Seita.7G264000/Seita.9G560500/Seita.1G123500/Seita.1G080900/Seita.1G309600/Seita.3G046000/Seita.3G136800/Seita.3G217800/Seita.4G115200/Seita.5G242700/Seita.5G319100/Seita.6G003700/Seita.8G252500/Seita.9G012600/Seita.9G227400/Seita.1G281500/Seita.3G003000/Seita.7G010400/Seita.7G319100/Seita.4G2…	63
Root.Cluster_C	BP	GO:0044550	secondary metabolite biosynthetic process	86/2605	218/9983	9.03575e-06	0.00141635	0.00132623	Seita.5G053200/Seita.6G243900/Seita.3G189100/Seita.9G117700/Seita.9G242900/Seita.2G140600/Seita.3G394400/Seita.6G061400/Seita.7G096800/Seita.8G252500/Seita.1G281500/Seita.9G257000/Seita.2G147600/Seita.2G219600/Seita.2G224300/Seita.2G107500/Seita.6G244000/Seita.8G091300/Seita.6G176900/Seita.5G047800/Seita.5G257200/Seita.6G237000/Seita.8G153700/Seita.3G298400/Seita.5G130100/Seita.5G130200/Seita.7G1…	86
Root.Cluster_C	BP	GO:0010200	response to chitin	48/2605	105/9983	1.03671e-05	0.00152733	0.00143015	Seita.2G206000/Seita.3G062200/Seita.7G104100/Seita.2G206100/Seita.4G277900/Seita.1G317600/Seita.2G291300/Seita.2G351400/Seita.7G213800/Seita.9G041300/Seita.9G555300/Seita.5G406200/Seita.5G207000/Seita.3G139200/Seita.9G137000/Seita.3G062400/Seita.9G345100/Seita.9G557600/Seita.1G034600/Seita.1G257600/Seita.1G278900/Seita.2G156100/Seita.2G156200/Seita.2G179700/Seita.2G195200/Seita.3G287100/Seita.4G1…	48
Root.Cluster_C	BP	GO:0055065	metal ion homeostasis	60/2605	140/9983	1.09617e-05	0.00152733	0.00143015	Seita.2G090500/Seita.9G558000/Seita.2G372300/Seita.5G085100/Seita.4G269800/Seita.3G260800/Seita.9G090100/Seita.2G397300/Seita.8G114700/Seita.1G281500/Seita.1G141800/Seita.6G150900/Seita.9G088000/Seita.3G215300/Seita.7G147600/Seita.7G288300/Seita.1G019500/Seita.1G274100/Seita.2G309200/Seita.3G049900/Seita.4G138500/Seita.5G103100/Seita.7G331800/Seita.8G118200/Seita.9G543800/Seita.1G206500/Seita.1G2…	60
Root.Cluster_C	BP	GO:0009415	response to water	126/2605	347/9983	1.25811e-05	0.0016607	0.00155503	Seita.1G323900/Seita.5G351300/Seita.7G108300/Seita.9G353200/Seita.9G488700/Seita.4G112100/Seita.7G283900/Seita.3G193800/Seita.5G319100/Seita.5G427300/Seita.6G152400/Seita.7G096800/Seita.8G045700/Seita.4G232000/Seita.8G008100/Seita.9G041900/Seita.2G178900/Seita.7G235800/Seita.5G406200/Seita.6G073000/Seita.1G161800/Seita.1G324300/Seita.2G406500/Seita.3G162400/Seita.4G082000/Seita.4G112000/Seita.5G0…	126
Root.Cluster_C	BP	GO:0009636	response to toxic substance	96/2605	252/9983	1.54483e-05	0.00193722	0.00181396	Seita.7G194000/Seita.9G262500/Seita.1G295400/Seita.2G090500/Seita.5G053200/Seita.9G537300/Seita.2G352900/Seita.4G011900/Seita.1G002000/Seita.1G117500/Seita.1G239600/Seita.1G336800/Seita.7G093900/Seita.1G245800/Seita.3G038700/Seita.3G089400/Seita.4G232000/Seita.6G053800/Seita.2G178900/Seita.3G099600/Seita.8G091300/Seita.9G444200/Seita.1G012200/Seita.1G045200/Seita.1G192100/Seita.2G406500/Seita.4G0…	96
Root.Cluster_C	BP	GO:0072511	divalent inorganic cation transport	45/2605	98/9983	1.68627e-05	0.00201388	0.00188574	Seita.7G194000/Seita.9G168300/Seita.2G090500/Seita.3G208100/Seita.4G269800/Seita.7G156200/Seita.3G312900/Seita.4G260900/Seita.9G003100/Seita.7G214000/Seita.9G366600/Seita.1G049200/Seita.1G141800/Seita.3G193100/Seita.6G150900/Seita.1G019500/Seita.1G165200/Seita.3G049900/Seita.4G195900/Seita.7G193900/Seita.7G228200/Seita.9G339800/Seita.1G231200/Seita.4G259400/Seita.5G189900/Seita.8G008600/Seita.9G0…	45
Root.Cluster_C	BP	GO:0071554	cell wall organization or biogenesis	144/2605	409/9983	1.98374e-05	0.00226146	0.00211757	Seita.2G356200/Seita.9G490100/Seita.1G240800/Seita.2G191300/Seita.2G193300/Seita.2G209100/Seita.3G205300/Seita.5G053200/Seita.5G127500/Seita.6G002300/Seita.6G086100/Seita.9G537300/Seita.2G080900/Seita.5G079000/Seita.7G196300/Seita.7G264000/Seita.9G060800/Seita.9G132100/Seita.9G260200/Seita.9G560500/Seita.3G246700/Seita.1G123500/Seita.5G328200/Seita.1G080900/Seita.1G309600/Seita.2G383500/Seita.3G0…	144
Root.Cluster_C	BP	GO:0050801	ion homeostasis	83/2605	213/9983	2.20267e-05	0.00240187	0.00224904	Seita.2G090500/Seita.9G558000/Seita.2G372300/Seita.5G085100/Seita.1G344700/Seita.4G269800/Seita.3G260800/Seita.9G090100/Seita.2G397300/Seita.8G114700/Seita.1G281500/Seita.1G141800/Seita.3G193100/Seita.6G150900/Seita.9G088000/Seita.9G277500/Seita.3G215300/Seita.7G147600/Seita.7G288300/Seita.7G193300/Seita.1G019500/Seita.1G256100/Seita.1G263000/Seita.1G274100/Seita.2G309200/Seita.3G049900/Seita.4G1…	83
Root.Cluster_C	BP	GO:0010268	brassinosteroid homeostasis	17/2605	26/9983	2.91404e-05	0.00304081	0.00284733	Seita.3G114000/Seita.9G480100/Seita.7G132100/Seita.9G173500/Seita.2G229900/Seita.3G116300/Seita.7G318000/Seita.8G027000/Seita.3G201500/Seita.5G139200/Seita.7G204200/Seita.8G166500/Seita.9G021400/Seita.1G166600/Seita.4G224700/Seita.6G089500/Seita.1G373300	17
Root.Cluster_C	BP	GO:0070838	divalent metal ion transport	44/2605	97/9983	3.03111e-05	0.00304081	0.00284733	Seita.7G194000/Seita.9G168300/Seita.2G090500/Seita.3G208100/Seita.7G156200/Seita.3G312900/Seita.4G260900/Seita.9G003100/Seita.7G214000/Seita.9G366600/Seita.1G049200/Seita.1G141800/Seita.3G193100/Seita.6G150900/Seita.1G019500/Seita.1G165200/Seita.3G049900/Seita.4G195900/Seita.7G193900/Seita.7G228200/Seita.9G339800/Seita.1G231200/Seita.4G259400/Seita.5G189900/Seita.8G008600/Seita.9G085500/Seita.1G3…	44
Root.Cluster_C	BP	GO:0009414	response to water deprivation	122/2605	340/9983	3.22608e-05	0.00311193	0.00291392	Seita.1G323900/Seita.5G351300/Seita.7G108300/Seita.9G353200/Seita.9G488700/Seita.4G112100/Seita.7G283900/Seita.3G193800/Seita.5G319100/Seita.5G427300/Seita.6G152400/Seita.7G096800/Seita.8G045700/Seita.4G232000/Seita.9G041900/Seita.2G178900/Seita.7G235800/Seita.5G406200/Seita.6G073000/Seita.1G161800/Seita.1G324300/Seita.2G406500/Seita.3G162400/Seita.4G082000/Seita.4G112000/Seita.5G046700/Seita.5G1…	122
Root.Cluster_C	BP	GO:0072330	monocarboxylic acid biosynthetic process	85/2605	223/9983	4.55543e-05	0.00419915	0.00393196	Seita.5G136200/Seita.9G061600/Seita.9G184100/Seita.2G104900/Seita.5G014400/Seita.5G087500/Seita.7G096800/Seita.8G243500/Seita.1G245800/Seita.6G011900/Seita.9G041900/Seita.2G105100/Seita.6G219700/Seita.2G334600/Seita.3G020300/Seita.4G101200/Seita.4G169900/Seita.4G267900/Seita.5G134800/Seita.5G313600/Seita.6G164700/Seita.7G162900/Seita.2G042900/Seita.5G130100/Seita.5G130200/Seita.5G151600/Seita.7G1…	85
Root.Cluster_C	BP	GO:0006790	sulfur compound metabolic process	90/2605	239/9983	4.68804e-05	0.00419915	0.00393196	Seita.2G154400/Seita.6G243900/Seita.7G103100/Seita.9G061600/Seita.3G189100/Seita.9G117700/Seita.2G104900/Seita.7G298100/Seita.5G090200/Seita.5G299100/Seita.8G243500/Seita.5G440600/Seita.8G204000/Seita.1G245800/Seita.4G232000/Seita.8G008100/Seita.9G446500/Seita.2G105100/Seita.2G178900/Seita.3G397200/Seita.6G244000/Seita.7G288300/Seita.1G047500/Seita.3G140700/Seita.4G024000/Seita.5G047800/Seita.5G2…	90
Root.Cluster_C	BP	GO:0016132	brassinosteroid biosynthetic process	14/2605	20/9983	4.87255e-05	0.00421392	0.0039458	Seita.3G114000/Seita.9G480100/Seita.2G231300/Seita.7G132100/Seita.9G173500/Seita.2G229900/Seita.3G116300/Seita.7G318000/Seita.8G027000/Seita.5G139200/Seita.7G204200/Seita.8G166500/Seita.9G021400/Seita.6G089500	14
Root.Cluster_C	BP	GO:0006812	cation transport	143/2605	415/9983	7.09047e-05	0.00592763	0.00555047	Seita.7G069900/Seita.7G194000/Seita.9G168300/Seita.2G090500/Seita.2G432200/Seita.7G111600/Seita.9G558000/Seita.1G175000/Seita.5G085100/Seita.9G488700/Seita.3G208100/Seita.4G269800/Seita.7G156200/Seita.3G260800/Seita.3G312900/Seita.4G260900/Seita.5G127600/Seita.7G230400/Seita.9G003100/Seita.9G090100/Seita.9G523900/Seita.1G055700/Seita.1G191100/Seita.2G217600/Seita.2G397300/Seita.5G192900/Seita.5G3…	143
Root.Cluster_C	BP	GO:0080167	response to karrikin	56/2605	136/9983	8.23216e-05	0.00666008	0.00623631	Seita.1G115700/Seita.1G115800/Seita.1G116000/Seita.1G116100/Seita.4G277900/Seita.7G218600/Seita.1G346600/Seita.2G334500/Seita.6G008000/Seita.4G232000/Seita.2G178900/Seita.5G356600/Seita.7G028400/Seita.1G057100/Seita.7G046700/Seita.2G081000/Seita.8G228200/Seita.9G043300/Seita.9G064400/Seita.9G379000/Seita.3G393100/Seita.5G274700/Seita.6G118900/Seita.7G168700/Seita.1G225000/Seita.2G335600/Seita.6G1…	56
Root.Cluster_C	BP	GO:0016131	brassinosteroid metabolic process	18/2605	30/9983	8.97931e-05	0.00703754	0.00658975	Seita.3G114000/Seita.9G480100/Seita.2G231300/Seita.7G132100/Seita.9G173500/Seita.2G229900/Seita.3G116300/Seita.7G318000/Seita.8G027000/Seita.3G201500/Seita.5G139200/Seita.7G204200/Seita.8G166500/Seita.9G021400/Seita.1G166600/Seita.4G224700/Seita.6G089500/Seita.1G373300	18
Root.Cluster_C	BP	GO:0016143	S-glycoside metabolic process	29/2605	59/9983	0.000118361	0.00844638	0.00790895	Seita.2G154400/Seita.9G061600/Seita.2G104900/Seita.7G298100/Seita.5G090200/Seita.1G245800/Seita.2G105100/Seita.3G140700/Seita.5G047800/Seita.5G251200/Seita.5G257200/Seita.1G158700/Seita.2G042900/Seita.3G186600/Seita.9G015300/Seita.1G064000/Seita.2G278500/Seita.4G181500/Seita.9G061300/Seita.9G061500/Seita.9G554000/Seita.1G063900/Seita.1G064100/Seita.1G270800/Seita.1G271000/Seita.5G146100/Seita.5G3…	29
Root.Cluster_C	BP	GO:0019757	glycosinolate metabolic process	29/2605	59/9983	0.000118361	0.00844638	0.00790895	Seita.2G154400/Seita.9G061600/Seita.2G104900/Seita.7G298100/Seita.5G090200/Seita.1G245800/Seita.2G105100/Seita.3G140700/Seita.5G047800/Seita.5G251200/Seita.5G257200/Seita.1G158700/Seita.2G042900/Seita.3G186600/Seita.9G015300/Seita.1G064000/Seita.2G278500/Seita.4G181500/Seita.9G061300/Seita.9G061500/Seita.9G554000/Seita.1G063900/Seita.1G064100/Seita.1G270800/Seita.1G271000/Seita.5G146100/Seita.5G3…	29
Root.Cluster_C	BP	GO:0019760	glucosinolate metabolic process	29/2605	59/9983	0.000118361	0.00844638	0.00790895	Seita.2G154400/Seita.9G061600/Seita.2G104900/Seita.7G298100/Seita.5G090200/Seita.1G245800/Seita.2G105100/Seita.3G140700/Seita.5G047800/Seita.5G251200/Seita.5G257200/Seita.1G158700/Seita.2G042900/Seita.3G186600/Seita.9G015300/Seita.1G064000/Seita.2G278500/Seita.4G181500/Seita.9G061300/Seita.9G061500/Seita.9G554000/Seita.1G063900/Seita.1G064100/Seita.1G270800/Seita.1G271000/Seita.5G146100/Seita.5G3…	29
Root.Cluster_C	BP	GO:0006875	cellular metal ion homeostasis	42/2605	96/9983	0.000126158	0.00844638	0.00790895	Seita.9G558000/Seita.5G085100/Seita.4G269800/Seita.3G260800/Seita.9G090100/Seita.2G397300/Seita.8G114700/Seita.1G141800/Seita.6G150900/Seita.9G088000/Seita.3G215300/Seita.7G288300/Seita.1G274100/Seita.3G049900/Seita.5G103100/Seita.7G331800/Seita.8G118200/Seita.9G543800/Seita.1G231200/Seita.2G197500/Seita.3G166700/Seita.4G235900/Seita.4G259400/Seita.9G344700/Seita.1G379500/Seita.2G159000/Seita.2G4…	42
Root.Cluster_C	BP	GO:0000302	response to reactive oxygen species	75/2605	197/9983	0.000130436	0.00844638	0.00790895	Seita.7G069900/Seita.9G262500/Seita.1G295400/Seita.9G353200/Seita.4G011900/Seita.1G117500/Seita.2G225400/Seita.7G093900/Seita.J004100/Seita.1G281500/Seita.2G219600/Seita.4G274700/Seita.6G053800/Seita.8G173800/Seita.2G335300/Seita.9G444200/Seita.1G012200/Seita.1G045200/Seita.1G192100/Seita.1G210300/Seita.2G225500/Seita.5G047800/Seita.5G207000/Seita.7G023900/Seita.7G126300/Seita.7G225300/Seita.7G33…	75
Root.Cluster_C	BP	GO:0016053	organic acid biosynthetic process	143/2605	420/9983	0.000134359	0.00844638	0.00790895	Seita.5G136200/Seita.9G061600/Seita.9G262400/Seita.9G184100/Seita.2G104900/Seita.5G014400/Seita.5G087500/Seita.7G096800/Seita.7G166900/Seita.8G243500/Seita.9G186600/Seita.4G096200/Seita.1G245800/Seita.6G011900/Seita.9G041900/Seita.1G009100/Seita.2G105100/Seita.3G397200/Seita.9G456500/Seita.6G219700/Seita.7G126900/Seita.1G127500/Seita.2G003000/Seita.2G056500/Seita.2G334600/Seita.3G020300/Seita.4G0…	143
Root.Cluster_C	BP	GO:0046394	carboxylic acid biosynthetic process	143/2605	420/9983	0.000134359	0.00844638	0.00790895	Seita.5G136200/Seita.9G061600/Seita.9G262400/Seita.9G184100/Seita.2G104900/Seita.5G014400/Seita.5G087500/Seita.7G096800/Seita.7G166900/Seita.8G243500/Seita.9G186600/Seita.4G096200/Seita.1G245800/Seita.6G011900/Seita.9G041900/Seita.1G009100/Seita.2G105100/Seita.3G397200/Seita.9G456500/Seita.6G219700/Seita.7G126900/Seita.1G127500/Seita.2G003000/Seita.2G056500/Seita.2G334600/Seita.3G020300/Seita.4G0…	143
Root.Cluster_C	BP	GO:0042546	cell wall biogenesis	66/2605	169/9983	0.000136703	0.00844638	0.00790895	Seita.2G356200/Seita.9G490100/Seita.2G209100/Seita.3G205300/Seita.5G127500/Seita.6G086100/Seita.2G080900/Seita.7G264000/Seita.9G560500/Seita.1G123500/Seita.1G080900/Seita.1G309600/Seita.3G046000/Seita.3G136800/Seita.3G217800/Seita.4G115200/Seita.5G242700/Seita.5G319100/Seita.6G003700/Seita.8G252500/Seita.9G012600/Seita.9G227400/Seita.1G281500/Seita.3G003000/Seita.7G010400/Seita.7G319100/Seita.4G2…	66
Root.Cluster_C	BP	GO:0006979	response to oxidative stress	131/2605	380/9983	0.000138079	0.00844638	0.00790895	Seita.7G069900/Seita.9G262500/Seita.1G295400/Seita.9G353200/Seita.3G160700/Seita.4G011900/Seita.1G117500/Seita.1G192000/Seita.1G336800/Seita.2G225400/Seita.6G036000/Seita.7G093900/Seita.8G045700/Seita.J004100/Seita.1G281500/Seita.2G219600/Seita.3G089400/Seita.4G232000/Seita.4G274700/Seita.6G053800/Seita.2G178900/Seita.8G173800/Seita.8G238500/Seita.2G335300/Seita.3G099600/Seita.9G444200/Seita.1G01…	131
Root.Cluster_C	BP	GO:0098771	inorganic ion homeostasis	69/2605	179/9983	0.000154808	0.00924423	0.00865604	Seita.2G090500/Seita.9G558000/Seita.2G372300/Seita.5G085100/Seita.4G269800/Seita.3G260800/Seita.9G090100/Seita.2G397300/Seita.8G114700/Seita.1G281500/Seita.1G141800/Seita.6G150900/Seita.9G088000/Seita.3G215300/Seita.7G147600/Seita.7G288300/Seita.7G193300/Seita.1G019500/Seita.1G256100/Seita.1G263000/Seita.1G274100/Seita.2G309200/Seita.3G049900/Seita.4G138500/Seita.5G103100/Seita.7G331800/Seita.8G1…	69
Root.Cluster_C	BP	GO:0009624	response to nematode	40/2605	91/9983	0.000160093	0.00933749	0.00874337	Seita.4G106500/Seita.7G185900/Seita.7G298300/Seita.5G051800/Seita.2G090200/Seita.8G084200/Seita.7G064200/Seita.1G141800/Seita.3G193100/Seita.9G275000/Seita.7G107900/Seita.5G039100/Seita.7G228200/Seita.9G341200/Seita.9G416600/Seita.7G039700/Seita.1G028000/Seita.1G379500/Seita.2G335600/Seita.7G039900/Seita.8G181700/Seita.8G005600/Seita.2G260700/Seita.5G022400/Seita.7G043900/Seita.7G064100/Seita.7G0…	40
Root.Cluster_C	BP	GO:0055080	cation homeostasis	64/2605	164/9983	0.000175743	0.0100173	0.00937995	Seita.2G090500/Seita.9G558000/Seita.2G372300/Seita.5G085100/Seita.4G269800/Seita.3G260800/Seita.9G090100/Seita.2G397300/Seita.8G114700/Seita.1G281500/Seita.1G141800/Seita.6G150900/Seita.9G088000/Seita.3G215300/Seita.7G147600/Seita.7G288300/Seita.1G019500/Seita.1G274100/Seita.2G309200/Seita.3G049900/Seita.4G138500/Seita.5G103100/Seita.7G331800/Seita.8G118200/Seita.9G543800/Seita.1G206500/Seita.1G2…	64
Root.Cluster_C	BP	GO:0042592	homeostatic process	141/2605	417/9983	0.000212759	0.0116586	0.0109168	Seita.9G262500/Seita.2G090500/Seita.3G114000/Seita.9G480100/Seita.9G558000/Seita.2G372300/Seita.3G170600/Seita.3G189100/Seita.5G085100/Seita.1G344700/Seita.4G269800/Seita.3G260800/Seita.3G312900/Seita.7G130000/Seita.9G090100/Seita.1G155500/Seita.1G179000/Seita.1G319500/Seita.1G336800/Seita.2G068400/Seita.2G397300/Seita.7G096800/Seita.8G114700/Seita.1G281500/Seita.7G132100/Seita.3G089400/Seita.5G4…	141
Root.Cluster_C	BP	GO:1903338	regulation of cell wall organization or biogenesis	19/2605	34/9983	0.000213833	0.0116586	0.0109168	Seita.3G205300/Seita.9G560500/Seita.1G309600/Seita.3G136800/Seita.4G115200/Seita.5G242700/Seita.6G003700/Seita.1G281500/Seita.3G003000/Seita.6G154200/Seita.4G003000/Seita.7G220500/Seita.9G345100/Seita.2G200200/Seita.9G557600/Seita.2G199800/Seita.2G199900/Seita.5G363400/Seita.2G415500	19
Root.Cluster_C	BP	GO:0046916	cellular transition metal ion homeostasis	28/2605	58/9983	0.000227911	0.0121617	0.0113879	Seita.9G558000/Seita.5G085100/Seita.4G269800/Seita.2G397300/Seita.8G114700/Seita.1G141800/Seita.6G150900/Seita.3G215300/Seita.1G274100/Seita.3G049900/Seita.5G103100/Seita.7G331800/Seita.2G197500/Seita.4G235900/Seita.9G344700/Seita.1G379500/Seita.2G159000/Seita.2G426200/Seita.5G342100/Seita.3G030500/Seita.3G051000/Seita.4G175000/Seita.5G270400/Seita.5G455700/Seita.7G218000/Seita.9G469400/Seita.1G1…	28
Root.Cluster_C	BP	GO:0090693	plant organ senescence	68/2605	178/9983	0.000234388	0.0122468	0.0114675	Seita.3G147300/Seita.1G240800/Seita.2G154400/Seita.5G201900/Seita.9G289600/Seita.9G080000/Seita.9G132100/Seita.9G367400/Seita.1G340400/Seita.3G160700/Seita.9G117700/Seita.5G468100/Seita.3G030000/Seita.4G054000/Seita.4G226200/Seita.5G126200/Seita.6G164900/Seita.3G120900/Seita.7G078900/Seita.8G008100/Seita.8G238500/Seita.6G073000/Seita.1G362600/Seita.2G309200/Seita.1G206500/Seita.2G072400/Seita.9G0…	68
Root.Cluster_C	BP	GO:0055082	cellular chemical homeostasis	57/2605	144/9983	0.000251975	0.012897	0.0120764	Seita.9G558000/Seita.5G085100/Seita.4G269800/Seita.3G260800/Seita.9G090100/Seita.1G179000/Seita.2G397300/Seita.8G114700/Seita.1G141800/Seita.6G150900/Seita.9G088000/Seita.3G215300/Seita.7G288300/Seita.1G274100/Seita.3G049900/Seita.4G138500/Seita.4G159500/Seita.5G103100/Seita.5G134800/Seita.5G313600/Seita.6G123500/Seita.7G088700/Seita.7G331800/Seita.8G118200/Seita.9G533500/Seita.9G543800/Seita.1G2…	57
Root.Cluster_C	BP	GO:0098754	detoxification	51/2605	126/9983	0.000277377	0.0136758	0.0128056	Seita.7G194000/Seita.9G262500/Seita.2G090500/Seita.5G053200/Seita.9G537300/Seita.4G011900/Seita.1G002000/Seita.1G117500/Seita.1G336800/Seita.1G245800/Seita.3G089400/Seita.4G232000/Seita.6G053800/Seita.2G178900/Seita.3G099600/Seita.9G444200/Seita.1G192100/Seita.2G406500/Seita.5G346500/Seita.5G463200/Seita.7G023900/Seita.7G193900/Seita.7G225300/Seita.9G064400/Seita.3G286500/Seita.6G210000/Seita.9G3…	51
Root.Cluster_C	BP	GO:0044262	cellular carbohydrate metabolic process	105/2605	299/9983	0.000287158	0.0136758	0.0128056	Seita.2G356200/Seita.2G191300/Seita.2G193300/Seita.2G209100/Seita.2G080900/Seita.7G264000/Seita.9G260200/Seita.1G123500/Seita.1G080900/Seita.1G179000/Seita.3G046000/Seita.3G217800/Seita.3G253500/Seita.5G237300/Seita.5G319100/Seita.7G230800/Seita.9G227400/Seita.5G065300/Seita.7G010400/Seita.4G011500/Seita.4G083000/Seita.7G046700/Seita.2G265900/Seita.2G168000/Seita.2G237100/Seita.3G133300/Seita.4G0…	105
Root.Cluster_C	BP	GO:0009410	response to xenobiotic stimulus	13/2605	20/9983	0.000288208	0.0136758	0.0128056	Seita.1G117500/Seita.3G038700/Seita.8G091300/Seita.8G153700/Seita.9G552800/Seita.5G104100/Seita.9G205600/Seita.9G205700/Seita.9G205800/Seita.1G089800/Seita.3G217600/Seita.5G008900/Seita.8G041200	13
Root.Cluster_C	BP	GO:0030003	cellular cation homeostasis	45/2605	108/9983	0.000289001	0.0136758	0.0128056	Seita.9G558000/Seita.5G085100/Seita.4G269800/Seita.3G260800/Seita.9G090100/Seita.2G397300/Seita.8G114700/Seita.1G141800/Seita.6G150900/Seita.9G088000/Seita.3G215300/Seita.7G288300/Seita.1G274100/Seita.3G049900/Seita.4G138500/Seita.5G103100/Seita.7G331800/Seita.8G118200/Seita.9G543800/Seita.1G231200/Seita.2G197500/Seita.3G166700/Seita.4G235900/Seita.4G259400/Seita.9G344700/Seita.1G379500/Seita.2G1…	45
Root.Cluster_C	BP	GO:0007568	aging	76/2605	205/9983	0.000310733	0.0144318	0.0135136	Seita.3G147300/Seita.1G240800/Seita.2G154400/Seita.5G201900/Seita.9G289600/Seita.9G080000/Seita.9G132100/Seita.9G367400/Seita.1G340400/Seita.3G160700/Seita.9G117700/Seita.5G468100/Seita.3G030000/Seita.4G054000/Seita.4G226200/Seita.5G126200/Seita.6G164900/Seita.7G324800/Seita.8G034000/Seita.3G120900/Seita.7G078900/Seita.8G008100/Seita.3G397200/Seita.8G238500/Seita.6G073000/Seita.1G362600/Seita.2G3…	76
Root.Cluster_C	BP	GO:0098660	inorganic ion transmembrane transport	114/2605	330/9983	0.000335062	0.0152788	0.0143067	Seita.1G318800/Seita.7G194000/Seita.9G168300/Seita.2G432200/Seita.7G111600/Seita.1G175000/Seita.9G488700/Seita.3G208100/Seita.4G269800/Seita.7G156200/Seita.3G312900/Seita.4G260900/Seita.7G230400/Seita.9G523900/Seita.1G055700/Seita.1G191100/Seita.2G217600/Seita.4G032500/Seita.5G192900/Seita.5G333000/Seita.7G235500/Seita.9G322100/Seita.5G024400/Seita.7G214000/Seita.J010900/Seita.9G506300/Seita.7G14…	114
Root.Cluster_C	BP	GO:0006873	cellular ion homeostasis	49/2605	121/9983	0.000357208	0.0159978	0.0149799	Seita.9G558000/Seita.5G085100/Seita.4G269800/Seita.3G260800/Seita.9G090100/Seita.2G397300/Seita.8G114700/Seita.1G141800/Seita.6G150900/Seita.9G088000/Seita.3G215300/Seita.7G288300/Seita.1G274100/Seita.3G049900/Seita.4G138500/Seita.4G159500/Seita.5G103100/Seita.6G123500/Seita.7G331800/Seita.8G118200/Seita.9G533500/Seita.9G543800/Seita.1G231200/Seita.2G197500/Seita.3G166700/Seita.4G235900/Seita.4G2…	49
Root.Cluster_C	BP	GO:0010150	leaf senescence	65/2605	171/9983	0.000374282	0.0164684	0.0154206	Seita.1G240800/Seita.2G154400/Seita.5G201900/Seita.9G289600/Seita.9G080000/Seita.9G132100/Seita.9G367400/Seita.1G340400/Seita.3G160700/Seita.9G117700/Seita.5G468100/Seita.3G030000/Seita.4G054000/Seita.4G226200/Seita.5G126200/Seita.6G164900/Seita.3G120900/Seita.7G078900/Seita.8G008100/Seita.8G238500/Seita.6G073000/Seita.1G362600/Seita.2G309200/Seita.1G206500/Seita.2G072400/Seita.9G069700/Seita.9G1…	65
Root.Cluster_C	BP	GO:0016125	sterol metabolic process	31/2605	68/9983	0.000391563	0.0169317	0.0158544	Seita.3G114000/Seita.9G480100/Seita.3G019400/Seita.7G132100/Seita.9G173500/Seita.1G150500/Seita.1G047500/Seita.1G362600/Seita.2G079200/Seita.2G229900/Seita.3G116300/Seita.6G208200/Seita.7G318000/Seita.8G163100/Seita.2G257000/Seita.8G027000/Seita.5G139200/Seita.7G204200/Seita.8G014200/Seita.8G136000/Seita.8G166500/Seita.9G021400/Seita.9G205600/Seita.9G205700/Seita.9G205800/Seita.9G483700/Seita.5G0…	31
Root.Cluster_C	BP	GO:1905622	negative regulation of leaf development	11/2605	16/9983	0.000423614	0.0178981	0.0167593	Seita.9G132100/Seita.2G072400/Seita.9G069700/Seita.3G287100/Seita.4G105900/Seita.2G072100/Seita.9G048400/Seita.9G048700/Seita.1G315600/Seita.4G106300/Seita.9G123000	11
Root.Cluster_C	BP	GO:0016128	phytosteroid metabolic process	20/2605	38/9983	0.000428184	0.0178981	0.0167593	Seita.3G114000/Seita.9G480100/Seita.2G231300/Seita.3G019400/Seita.7G132100/Seita.9G173500/Seita.2G229900/Seita.3G116300/Seita.7G318000/Seita.8G027000/Seita.3G201500/Seita.5G139200/Seita.7G204200/Seita.8G166500/Seita.9G021400/Seita.1G166600/Seita.4G224700/Seita.6G089500/Seita.8G174000/Seita.1G373300	20
Root.Cluster_C	BP	GO:0006749	glutathione metabolic process	18/2605	33/9983	0.000467536	0.0191788	0.0179585	Seita.7G103100/Seita.4G232000/Seita.9G446500/Seita.2G178900/Seita.5G047800/Seita.9G064400/Seita.1G156200/Seita.9G446400/Seita.3G060800/Seita.6G153400/Seita.9G351000/Seita.9G446300/Seita.2G033500/Seita.5G104100/Seita.9G157600/Seita.5G442000/Seita.7G122100/Seita.9G261500	18
Root.Cluster_C	BP	GO:0009608	response to symbiont	16/2605	28/9983	0.000481764	0.0191788	0.0179585	Seita.2G199400/Seita.7G126400/Seita.4G151100/Seita.9G198800/Seita.1G334700/Seita.2G132500/Seita.3G060800/Seita.3G197500/Seita.4G186200/Seita.6G153100/Seita.6G178500/Seita.2G269700/Seita.5G008900/Seita.6G244300/Seita.5G280500/Seita.9G118600	16
Root.Cluster_C	BP	GO:0016129	phytosteroid biosynthetic process	16/2605	28/9983	0.000481764	0.0191788	0.0179585	Seita.3G114000/Seita.9G480100/Seita.2G231300/Seita.3G019400/Seita.7G132100/Seita.9G173500/Seita.2G229900/Seita.3G116300/Seita.7G318000/Seita.8G027000/Seita.5G139200/Seita.7G204200/Seita.8G166500/Seita.9G021400/Seita.6G089500/Seita.8G174000	16
Root.Cluster_C	BP	GO:0019288	isopentenyl diphosphate biosynthetic process, methylerythritol 4-phosphate pathway	10/2605	14/9983	0.000493793	0.0193505	0.0181193	Seita.5G065300/Seita.1G047500/Seita.3G245500/Seita.8G163100/Seita.2G187800/Seita.2G187900/Seita.5G071800/Seita.1G223900/Seita.9G105600/Seita.5G407200	10
Root.Cluster_C	BP	GO:0009698	phenylpropanoid metabolic process	48/2605	120/9983	0.000568505	0.0219356	0.0205399	Seita.4G226700/Seita.5G053200/Seita.6G243900/Seita.3G077100/Seita.3G394400/Seita.8G252500/Seita.1G281500/Seita.2G147600/Seita.1G057100/Seita.6G244000/Seita.8G091300/Seita.8G153700/Seita.5G130100/Seita.5G130200/Seita.5G274700/Seita.7G168700/Seita.8G126500/Seita.5G069500/Seita.7G220500/Seita.4G205900/Seita.6G163400/Seita.2G132800/Seita.3G142500/Seita.4G021600/Seita.4G121900/Seita.4G181500/Seita.5G3…	48
Root.Cluster_C	BP	GO:0055076	transition metal ion homeostasis	35/2605	81/9983	0.000593563	0.0225554	0.0211202	Seita.2G090500/Seita.9G558000/Seita.2G372300/Seita.5G085100/Seita.4G269800/Seita.9G090100/Seita.2G397300/Seita.8G114700/Seita.1G141800/Seita.6G150900/Seita.3G215300/Seita.1G274100/Seita.2G309200/Seita.3G049900/Seita.5G103100/Seita.7G331800/Seita.1G206500/Seita.2G197500/Seita.4G235900/Seita.9G344700/Seita.1G379500/Seita.2G159000/Seita.2G426200/Seita.5G342100/Seita.2G090300/Seita.3G030500/Seita.3G0…	35
Root.Cluster_C	BP	GO:0008299	isoprenoid biosynthetic process	59/2605	155/9983	0.000654672	0.0245062	0.0229469	Seita.9G061600/Seita.9G262400/Seita.2G104900/Seita.5G087500/Seita.7G096800/Seita.5G065300/Seita.4G288600/Seita.9G041900/Seita.2G105100/Seita.5G062900/Seita.1G047500/Seita.2G303000/Seita.3G245500/Seita.4G051800/Seita.6G208200/Seita.2G042900/Seita.7G116400/Seita.8G163100/Seita.2G257000/Seita.J004000/Seita.1G367300/Seita.2G000900/Seita.2G144900/Seita.2G187800/Seita.2G187900/Seita.2G300900/Seita.2G39…	59
Root.Cluster_C	BP	GO:0006720	isoprenoid metabolic process	70/2605	191/9983	0.000762452	0.028121	0.0263317	Seita.3G408300/Seita.9G061600/Seita.9G262400/Seita.2G104900/Seita.5G087500/Seita.7G096800/Seita.5G065300/Seita.4G288600/Seita.9G041900/Seita.2G105100/Seita.5G062900/Seita.1G047500/Seita.2G303000/Seita.3G245500/Seita.4G051800/Seita.6G208200/Seita.7G171000/Seita.7G171100/Seita.2G042900/Seita.7G116400/Seita.8G163100/Seita.2G257000/Seita.J004000/Seita.5G166000/Seita.1G367300/Seita.2G000900/Seita.2G14…	70
Root.Cluster_C	BP	GO:0019682	glyceraldehyde-3-phosphate metabolic process	16/2605	29/9983	0.000815925	0.0296571	0.0277701	Seita.9G363900/Seita.5G065300/Seita.2G265900/Seita.1G047500/Seita.3G245500/Seita.2G382400/Seita.8G163100/Seita.2G283600/Seita.2G187800/Seita.2G187900/Seita.5G071800/Seita.1G221400/Seita.1G223900/Seita.9G105600/Seita.5G377200/Seita.5G407200	16
Root.Cluster_C	BP	GO:1900673	olefin metabolic process	19/2605	37/9983	0.000883731	0.0316628	0.0296482	Seita.5G136200/Seita.9G117700/Seita.2G225400/Seita.8G008100/Seita.2G225500/Seita.1G335200/Seita.2G436000/Seita.6G097400/Seita.7G306400/Seita.9G109200/Seita.9G205600/Seita.9G205700/Seita.9G205800/Seita.1G345400/Seita.1G347600/Seita.7G208700/Seita.8G041200/Seita.9G117500/Seita.9G417600	19
Root.Cluster_C	BP	GO:0071466	cellular response to xenobiotic stimulus	10/2605	15/9983	0.00113469	0.039525	0.0370101	Seita.8G091300/Seita.8G153700/Seita.5G104100/Seita.9G205600/Seita.9G205700/Seita.9G205800/Seita.1G089800/Seita.3G217600/Seita.5G008900/Seita.8G041200	10
Root.Cluster_C	BP	GO:1900056	negative regulation of leaf senescence	10/2605	15/9983	0.00113469	0.039525	0.0370101	Seita.9G132100/Seita.2G072400/Seita.9G069700/Seita.3G287100/Seita.4G105900/Seita.2G072100/Seita.9G048400/Seita.9G048700/Seita.1G315600/Seita.4G106300	10
Root.Cluster_C	BP	GO:0016051	carbohydrate biosynthetic process	79/2605	223/9983	0.00115967	0.0398419	0.0373069	Seita.2G356200/Seita.2G209100/Seita.2G080900/Seita.7G264000/Seita.1G123500/Seita.1G080900/Seita.3G046000/Seita.3G217800/Seita.5G237300/Seita.5G319100/Seita.9G227400/Seita.9G186600/Seita.7G010400/Seita.4G083000/Seita.4G108400/Seita.6G219700/Seita.7G046700/Seita.1G127500/Seita.2G168000/Seita.3G133300/Seita.4G099700/Seita.4G101200/Seita.5G437200/Seita.9G416600/Seita.1G112000/Seita.1G294300/Seita.4G2…	79
Root.Cluster_C	BP	GO:0009699	phenylpropanoid biosynthetic process	40/2605	99/9983	0.00125811	0.0416343	0.0389852	Seita.5G053200/Seita.6G243900/Seita.3G394400/Seita.8G252500/Seita.1G281500/Seita.2G147600/Seita.6G244000/Seita.8G091300/Seita.8G153700/Seita.5G130100/Seita.5G130200/Seita.7G168700/Seita.8G126500/Seita.5G069500/Seita.7G220500/Seita.4G205900/Seita.6G163400/Seita.2G132800/Seita.3G142500/Seita.4G021600/Seita.4G181500/Seita.5G386300/Seita.5G434700/Seita.6G093400/Seita.7G168500/Seita.9G193900/Seita.9G3…	40
Root.Cluster_C	BP	GO:0071241	cellular response to inorganic substance	37/2605	90/9983	0.00129746	0.0416343	0.0389852	Seita.7G069900/Seita.1G115700/Seita.1G115800/Seita.1G116000/Seita.1G116100/Seita.1G240800/Seita.9G003100/Seita.2G225400/Seita.1G281500/Seita.2G219600/Seita.7G147600/Seita.2G225500/Seita.4G051800/Seita.1G044800/Seita.2G197500/Seita.5G198500/Seita.1G002200/Seita.1G335200/Seita.7G220500/Seita.1G127700/Seita.2G000900/Seita.2G077200/Seita.2G280700/Seita.2G390100/Seita.3G368800/Seita.9G109200/Seita.9G1…	37
Root.Cluster_C	BP	GO:1901617	organic hydroxy compound biosynthetic process	60/2605	162/9983	0.00130662	0.0416343	0.0389852	Seita.3G114000/Seita.9G061600/Seita.9G480100/Seita.2G231300/Seita.3G019400/Seita.2G104900/Seita.5G087500/Seita.7G096800/Seita.9G432200/Seita.7G132100/Seita.9G191500/Seita.6G011900/Seita.9G041900/Seita.9G173500/Seita.2G105100/Seita.1G287200/Seita.2G079200/Seita.2G229900/Seita.3G020300/Seita.3G116300/Seita.4G169900/Seita.6G208200/Seita.7G318000/Seita.2G042900/Seita.5G151600/Seita.7G116400/Seita.8G1…	60
Root.Cluster_C	BP	GO:0009723	response to ethylene	72/2605	201/9983	0.00133557	0.0416343	0.0389852	Seita.7G069900/Seita.1G240800/Seita.3G100500/Seita.5G201900/Seita.3G170600/Seita.9G080000/Seita.3G062200/Seita.9G117700/Seita.5G468100/Seita.2G005900/Seita.2G225400/Seita.2G289100/Seita.2G351400/Seita.3G164200/Seita.3G289000/Seita.8G077300/Seita.9G432200/Seita.1G281500/Seita.3G192000/Seita.2G219600/Seita.3G120900/Seita.8G150800/Seita.5G348100/Seita.1G210300/Seita.1G275400/Seita.2G225500/Seita.4G0…	72
Root.Cluster_C	BP	GO:0006721	terpenoid metabolic process	59/2605	159/9983	0.00135434	0.0416343	0.0389852	Seita.3G408300/Seita.9G061600/Seita.9G262400/Seita.2G104900/Seita.5G087500/Seita.7G096800/Seita.4G288600/Seita.9G041900/Seita.2G105100/Seita.2G303000/Seita.4G051800/Seita.6G208200/Seita.7G171000/Seita.7G171100/Seita.2G042900/Seita.7G116400/Seita.2G257000/Seita.J004000/Seita.5G166000/Seita.1G367300/Seita.2G000900/Seita.2G144900/Seita.2G145800/Seita.2G145900/Seita.2G300900/Seita.2G390100/Seita.4G01…	59
Root.Cluster_C	BP	GO:0048528	post-embryonic root development	59/2605	159/9983	0.00135434	0.0416343	0.0389852	Seita.1G115700/Seita.1G115800/Seita.1G116000/Seita.1G116100/Seita.3G100500/Seita.9G289600/Seita.5G285700/Seita.9G282200/Seita.1G286900/Seita.6G076100/Seita.9G454700/Seita.5G403700/Seita.9G054700/Seita.9G127600/Seita.3G159500/Seita.8G104000/Seita.1G210300/Seita.2G282100/Seita.3G033600/Seita.4G051800/Seita.5G282300/Seita.7G126300/Seita.9G272300/Seita.9G351700/Seita.6G153400/Seita.1G046800/Seita.1G2…	59
Root.Cluster_C	BP	GO:0010038	response to metal ion	135/2605	413/9983	0.00135943	0.0416343	0.0389852	Seita.7G069900/Seita.7G194000/Seita.1G240800/Seita.2G090500/Seita.3G062200/Seita.9G561400/Seita.7G185100/Seita.2G225400/Seita.6G036000/Seita.8G045700/Seita.1G281500/Seita.1G245800/Seita.2G219600/Seita.4G177400/Seita.4G232000/Seita.9G446500/Seita.1G141800/Seita.2G178900/Seita.3G397200/Seita.6G150900/Seita.9G088000/Seita.9G167800/Seita.3G215300/Seita.7G147600/Seita.7G289100/Seita.2G225500/Seita.3G0…	135
Root.Cluster_C	BP	GO:0009753	response to jasmonic acid	75/2605	211/9983	0.00137211	0.0416343	0.0389852	Seita.2G154400/Seita.5G201900/Seita.9G480100/Seita.9G286900/Seita.3G062200/Seita.7G225000/Seita.2G351400/Seita.6G056700/Seita.1G281500/Seita.7G214000/Seita.3G120900/Seita.6G011900/Seita.8G150800/Seita.4G083000/Seita.1G275400/Seita.5G047800/Seita.5G257200/Seita.6G055700/Seita.7G211300/Seita.7G212900/Seita.4G288100/Seita.9G455400/Seita.2G132500/Seita.3G060800/Seita.3G062400/Seita.7G220500/Seita.J00…	75
Root.Cluster_C	BP	GO:0046113	nucleobase catabolic process	9/2605	13/9983	0.00137277	0.0416343	0.0389852	Seita.9G353200/Seita.4G185200/Seita.3G376500/Seita.1G123600/Seita.1G224700/Seita.2G316000/Seita.3G013100/Seita.5G353700/Seita.8G233600	9
Root.Cluster_C	BP	GO:0071731	response to nitric oxide	12/2605	20/9983	0.00139445	0.0416343	0.0389852	Seita.7G069900/Seita.2G225400/Seita.1G281500/Seita.2G219600/Seita.1G210300/Seita.2G225500/Seita.7G126300/Seita.1G335200/Seita.7G220500/Seita.9G469400/Seita.2G219700/Seita.3G032300	12
Root.Cluster_C	BP	GO:0097366	response to bronchodilator	12/2605	20/9983	0.00139445	0.0416343	0.0389852	Seita.7G069900/Seita.2G225400/Seita.1G281500/Seita.2G219600/Seita.1G210300/Seita.2G225500/Seita.7G126300/Seita.1G335200/Seita.7G220500/Seita.9G469400/Seita.2G219700/Seita.3G032300	12
Root.Cluster_C	BP	GO:0008610	lipid biosynthetic process	132/2605	404/9983	0.00155783	0.0459235	0.0430015	Seita.3G114000/Seita.9G061600/Seita.9G262400/Seita.9G480100/Seita.2G231300/Seita.3G019400/Seita.2G104900/Seita.5G087500/Seita.7G096800/Seita.8G243500/Seita.5G065300/Seita.7G081500/Seita.7G132100/Seita.3G159500/Seita.4G288600/Seita.9G041900/Seita.9G173500/Seita.1G295100/Seita.2G105100/Seita.3G166100/Seita.5G062900/Seita.1G047500/Seita.2G079200/Seita.2G229900/Seita.2G303000/Seita.2G334600/Seita.3G1…	132
Root.Cluster_C	BP	GO:0098656	anion transmembrane transport	91/2605	265/9983	0.00157473	0.0459235	0.0430015	Seita.1G318800/Seita.7G185900/Seita.1G115700/Seita.1G115800/Seita.1G116000/Seita.1G116100/Seita.1G218600/Seita.7G169400/Seita.9G288200/Seita.9G341400/Seita.9G561400/Seita.5G127600/Seita.7G298300/Seita.4G032500/Seita.4G208500/Seita.5G051800/Seita.2G090200/Seita.9G506300/Seita.9G101800/Seita.9G299000/Seita.2G240500/Seita.7G157900/Seita.9G235900/Seita.9G277500/Seita.3G102000/Seita.4G208700/Seita.1G0…	91
Root.Cluster_C	BP	GO:0006805	xenobiotic metabolic process	8/2605	11/9983	0.00160298	0.0462101	0.0432699	Seita.8G091300/Seita.8G153700/Seita.5G104100/Seita.9G205600/Seita.9G205700/Seita.9G205800/Seita.1G089800/Seita.8G041200	8
Root.Cluster_C	BP	GO:0009404	toxin metabolic process	21/2605	44/9983	0.00162286	0.0462515	0.0433086	Seita.3G189100/Seita.9G117700/Seita.4G232000/Seita.2G178900/Seita.5G047800/Seita.9G064400/Seita.9G069700/Seita.6G153400/Seita.1G064000/Seita.2G033500/Seita.3G096900/Seita.3G097200/Seita.4G235500/Seita.4G235600/Seita.9G157600/Seita.1G063900/Seita.1G064100/Seita.5G442000/Seita.9G117500/Seita.9G261500/Seita.3G282000	21
Root.Cluster_C	CC	GO:0031226	intrinsic component of plasma membrane	143/2454	331/9955	4.52625e-14	1.56155e-11	1.53416e-11	Seita.1G318800/Seita.6G022400/Seita.7G194000/Seita.9G168300/Seita.9G172600/Seita.2G199400/Seita.5G469800/Seita.7G111600/Seita.7G170200/Seita.9G541300/Seita.2G211200/Seita.9G060800/Seita.4G022300/Seita.4G089800/Seita.9G276900/Seita.1G135500/Seita.5G007500/Seita.5G328200/Seita.9G410000/Seita.1G135700/Seita.1G322500/Seita.2G383500/Seita.3G082100/Seita.3G319200/Seita.3G319400/Seita.4G032500/Seita.4G0…	143
Root.Cluster_C	CC	GO:0005887	integral component of plasma membrane	91/2454	211/9955	2.25591e-09	3.89145e-07	3.82318e-07	Seita.1G318800/Seita.6G022400/Seita.7G194000/Seita.9G168300/Seita.9G172600/Seita.5G469800/Seita.7G111600/Seita.7G170200/Seita.9G541300/Seita.2G211200/Seita.4G089800/Seita.9G276900/Seita.1G135500/Seita.5G007500/Seita.9G410000/Seita.1G135700/Seita.3G082100/Seita.3G319200/Seita.3G319400/Seita.4G032500/Seita.4G051900/Seita.5G333000/Seita.9G506300/Seita.1G025100/Seita.2G123200/Seita.7G148600/Seita.1G0…	91
Root.Cluster_C	CC	GO:0005618	cell wall	170/2454	490/9955	2.1104e-07	2.12196e-05	2.08473e-05	Seita.1G318800/Seita.6G038200/Seita.6G038500/Seita.2G199400/Seita.4G253300/Seita.5G053200/Seita.5G467700/Seita.6G002300/Seita.7G277500/Seita.9G537300/Seita.5G181100/Seita.6G038100/Seita.7G109100/Seita.7G196300/Seita.1G340400/Seita.1G344700/Seita.4G022300/Seita.5G328200/Seita.7G225000/Seita.2G225400/Seita.2G383500/Seita.3G289000/Seita.5G062400/Seita.5G118800/Seita.5G319100/Seita.7G126400/Seita.7G2…	170
Root.Cluster_C	CC	GO:0030312	external encapsulating structure	170/2454	491/9955	2.46025e-07	2.12196e-05	2.08473e-05	Seita.1G318800/Seita.6G038200/Seita.6G038500/Seita.2G199400/Seita.4G253300/Seita.5G053200/Seita.5G467700/Seita.6G002300/Seita.7G277500/Seita.9G537300/Seita.5G181100/Seita.6G038100/Seita.7G109100/Seita.7G196300/Seita.1G340400/Seita.1G344700/Seita.4G022300/Seita.5G328200/Seita.7G225000/Seita.2G225400/Seita.2G383500/Seita.3G289000/Seita.5G062400/Seita.5G118800/Seita.5G319100/Seita.7G126400/Seita.7G2…	170
Root.Cluster_C	CC	GO:0031225	anchored component of membrane	61/2454	142/9955	1.15497e-06	7.96929e-05	7.82948e-05	Seita.2G199400/Seita.4G253300/Seita.9G060800/Seita.4G022300/Seita.5G328200/Seita.1G322500/Seita.2G383500/Seita.5G376800/Seita.7G099100/Seita.7G126400/Seita.9G508700/Seita.J002600/Seita.1G159600/Seita.3G102200/Seita.8G079300/Seita.9G479800/Seita.2G145300/Seita.3G217100/Seita.4G084200/Seita.7G206900/Seita.9G112400/Seita.9G150500/Seita.9G373900/Seita.4G205300/Seita.6G224400/Seita.1G127700/Seita.1G25…	61
Root.Cluster_C	CC	GO:0031012	extracellular matrix	17/2454	24/9955	2.41959e-06	0.000139126	0.000136686	Seita.6G038200/Seita.6G038500/Seita.6G038100/Seita.1G094700/Seita.1G162700/Seita.1G162800/Seita.6G037400/Seita.6G038400/Seita.6G038600/Seita.6G038700/Seita.6G038800/Seita.6G039000/Seita.6G039100/Seita.1G162600/Seita.6G038000/Seita.6G038900/Seita.6G039200	17
Root.Cluster_C	CC	GO:0046658	anchored component of plasma membrane	52/2454	119/9955	3.81608e-06	0.000188078	0.000184779	Seita.2G199400/Seita.9G060800/Seita.4G022300/Seita.5G328200/Seita.1G322500/Seita.2G383500/Seita.5G376800/Seita.7G099100/Seita.7G126400/Seita.9G508700/Seita.J002600/Seita.1G159600/Seita.8G079300/Seita.9G479800/Seita.2G145300/Seita.3G217100/Seita.4G084200/Seita.7G206900/Seita.9G112400/Seita.9G150500/Seita.9G373900/Seita.6G224400/Seita.1G127700/Seita.1G256300/Seita.2G044900/Seita.2G351200/Seita.3G14…	52
Root.Cluster_C	CC	GO:0000325	plant-type vacuole	81/2454	214/9955	1.02388e-05	0.000441547	0.000433801	Seita.3G147300/Seita.6G038200/Seita.6G038500/Seita.1G115700/Seita.1G115800/Seita.1G116000/Seita.1G116100/Seita.5G201900/Seita.5G469800/Seita.7G205800/Seita.9G541300/Seita.6G038100/Seita.4G269800/Seita.9G561400/Seita.1G271500/Seita.5G007500/Seita.2G426700/Seita.3G082100/Seita.3G267500/Seita.9G409600/Seita.3G120900/Seita.7G148600/Seita.1G141800/Seita.3G193100/Seita.9G088000/Seita.7G288300/Seita.3G0…	81
Root.Cluster_C	CC	GO:0009505	plant-type cell wall	79/2454	220/9955	0.000108695	0.00416664	0.00409354	Seita.1G318800/Seita.2G199400/Seita.5G053200/Seita.6G002300/Seita.9G537300/Seita.5G181100/Seita.7G109100/Seita.7G196300/Seita.1G340400/Seita.1G344700/Seita.4G022300/Seita.5G328200/Seita.7G225000/Seita.2G383500/Seita.5G062400/Seita.7G126400/Seita.7G207900/Seita.9G082500/Seita.1G316700/Seita.9G303200/Seita.1G210300/Seita.2G218700/Seita.5G153500/Seita.5G463200/Seita.7G126300/Seita.9G208200/Seita.9G3…	79
Root.Cluster_C	CC	GO:0005576	extracellular region	125/2454	384/9955	0.00022643	0.00781184	0.00767479	Seita.6G038200/Seita.6G038500/Seita.1G170500/Seita.4G253300/Seita.5G467700/Seita.6G128600/Seita.6G038100/Seita.9G060800/Seita.9G492700/Seita.1G340400/Seita.3G312900/Seita.7G205900/Seita.9G276200/Seita.1G094700/Seita.1G245800/Seita.4G232000/Seita.6G014900/Seita.8G179800/Seita.9G356600/Seita.2G178900/Seita.2G209200/Seita.3G397200/Seita.1G002800/Seita.1G324300/Seita.1G331300/Seita.2G003000/Seita.2G1…	125
Root.Cluster_C	CC	GO:0042807	central vacuole	10/2454	15/9955	0.000697967	0.0218908	0.0215067	Seita.5G469800/Seita.9G541300/Seita.5G007500/Seita.3G082100/Seita.9G208400/Seita.1G259900/Seita.7G189600/Seita.5G007400/Seita.4G160700/Seita.9G571600	10
Root.Cluster_C	MF	GO:0015318	inorganic molecular entity transmembrane transporter activity	179/2280	478/8539	7.84717e-08	2.22157e-05	1.96946e-05	Seita.1G318800/Seita.7G185900/Seita.7G194000/Seita.9G168300/Seita.1G115700/Seita.1G115800/Seita.1G116000/Seita.1G116100/Seita.1G218600/Seita.2G432200/Seita.5G469800/Seita.7G111600/Seita.7G170200/Seita.9G541300/Seita.1G175000/Seita.9G288200/Seita.9G488700/Seita.3G208100/Seita.4G089800/Seita.4G269800/Seita.7G156200/Seita.9G561400/Seita.4G260900/Seita.5G007500/Seita.5G127600/Seita.7G230400/Seita.7G2…	179
Root.Cluster_C	MF	GO:0005372	water transmembrane transporter activity	24/2280	34/8539	1.10709e-07	2.22157e-05	1.96946e-05	Seita.1G318800/Seita.5G469800/Seita.7G170200/Seita.9G541300/Seita.4G089800/Seita.5G007500/Seita.3G082100/Seita.1G025100/Seita.2G123200/Seita.1G372300/Seita.9G208400/Seita.1G259900/Seita.2G123300/Seita.4G180100/Seita.7G189600/Seita.8G085300/Seita.9G193500/Seita.9G268100/Seita.2G123000/Seita.3G073300/Seita.4G098700/Seita.5G007400/Seita.4G160700/Seita.9G571600	24
Root.Cluster_C	MF	GO:0015250	water channel activity	24/2280	34/8539	1.10709e-07	2.22157e-05	1.96946e-05	Seita.1G318800/Seita.5G469800/Seita.7G170200/Seita.9G541300/Seita.4G089800/Seita.5G007500/Seita.3G082100/Seita.1G025100/Seita.2G123200/Seita.1G372300/Seita.9G208400/Seita.1G259900/Seita.2G123300/Seita.4G180100/Seita.7G189600/Seita.8G085300/Seita.9G193500/Seita.9G268100/Seita.2G123000/Seita.3G073300/Seita.4G098700/Seita.5G007400/Seita.4G160700/Seita.9G571600	24
Root.Cluster_C	MF	GO:0004497	monooxygenase activity	74/2280	167/8539	5.63781e-07	8.4849e-05	7.52202e-05	Seita.3G114000/Seita.9G480100/Seita.9G242900/Seita.9G415500/Seita.6G155100/Seita.2G140600/Seita.6G061400/Seita.7G096800/Seita.7G132100/Seita.9G257000/Seita.2G219600/Seita.2G224300/Seita.9G173500/Seita.2G107500/Seita.2G404400/Seita.5G044300/Seita.6G176900/Seita.1G260600/Seita.2G201000/Seita.2G229900/Seita.3G116300/Seita.6G237000/Seita.7G162900/Seita.7G318000/Seita.9G327800/Seita.3G298400/Seita.5G1…	74
Root.Cluster_C	MF	GO:0015075	ion transmembrane transporter activity	176/2280	488/8539	1.80991e-06	0.000217913	0.000193184	Seita.1G318800/Seita.7G185900/Seita.7G194000/Seita.9G168300/Seita.1G115700/Seita.1G115800/Seita.1G116000/Seita.1G116100/Seita.1G218600/Seita.2G432200/Seita.7G111600/Seita.7G169400/Seita.1G175000/Seita.9G288200/Seita.9G488700/Seita.3G208100/Seita.4G269800/Seita.7G156200/Seita.9G561400/Seita.4G260900/Seita.5G127600/Seita.7G230400/Seita.7G298300/Seita.9G090100/Seita.9G523900/Seita.2G217600/Seita.4G0…	176
Root.Cluster_C	MF	GO:0048037	cofactor binding	81/2280	199/8539	1.00187e-05	0.00100521	0.000891139	Seita.3G206500/Seita.6G002300/Seita.9G061600/Seita.9G254200/Seita.9G353200/Seita.2G352900/Seita.2G104900/Seita.7G205900/Seita.1G034000/Seita.1G117500/Seita.2G442100/Seita.3G351700/Seita.5G299100/Seita.9G448500/Seita.7G132100/Seita.9G186600/Seita.9G191500/Seita.3G038700/Seita.3G281700/Seita.4G232000/Seita.9G396700/Seita.2G105100/Seita.2G178900/Seita.3G397200/Seita.7G028400/Seita.9G386300/Seita.1G0…	81
Root.Cluster_C	MF	GO:0004553	hydrolase activity, hydrolyzing O-glycosyl compounds	90/2280	228/8539	1.41571e-05	0.00121751	0.00107935	Seita.2G193300/Seita.3G250400/Seita.9G060800/Seita.9G492700/Seita.1G098500/Seita.4G022300/Seita.5G328200/Seita.2G383500/Seita.3G253500/Seita.7G164400/Seita.9G276200/Seita.2G254100/Seita.4G286000/Seita.7G150600/Seita.8G179800/Seita.5G356600/Seita.7G150300/Seita.7G150400/Seita.7G150500/Seita.2G081000/Seita.2G237100/Seita.5G258600/Seita.5G336600/Seita.6G239900/Seita.8G079300/Seita.9G021900/Seita.9G0…	90
Root.Cluster_C	MF	GO:0035251	UDP-glucosyltransferase activity	39/2280	82/8539	3.89335e-05	0.00272849	0.00241886	Seita.3G194600/Seita.5G127500/Seita.8G117700/Seita.8G192500/Seita.3G077100/Seita.7G194300/Seita.8G192600/Seita.4G228200/Seita.5G319100/Seita.7G194800/Seita.7G319100/Seita.4G226900/Seita.1G057100/Seita.6G073000/Seita.8G091300/Seita.8G203200/Seita.5G429100/Seita.8G083400/Seita.8G153700/Seita.9G410800/Seita.4G127200/Seita.4G271600/Seita.5G274700/Seita.9G424800/Seita.4G120200/Seita.1G245200/Seita.3G1…	39
Root.Cluster_C	MF	GO:0016798	hydrolase activity, acting on glycosyl bonds	95/2280	249/8539	4.07914e-05	0.00272849	0.00241886	Seita.2G193300/Seita.3G250400/Seita.9G060800/Seita.9G492700/Seita.1G098500/Seita.4G022300/Seita.8G164600/Seita.5G328200/Seita.1G192000/Seita.2G383500/Seita.3G253500/Seita.7G164400/Seita.9G276200/Seita.2G254100/Seita.4G286000/Seita.7G150600/Seita.8G179800/Seita.5G356600/Seita.7G150300/Seita.7G150400/Seita.7G150500/Seita.2G081000/Seita.2G237100/Seita.5G258600/Seita.5G336600/Seita.6G239900/Seita.8G0…	95
Root.Cluster_C	MF	GO:0046527	glucosyltransferase activity	50/2280	116/8539	8.97933e-05	0.00540556	0.00479213	Seita.2G209100/Seita.3G194600/Seita.5G127500/Seita.2G080900/Seita.8G117700/Seita.8G192500/Seita.3G077100/Seita.7G194300/Seita.8G192600/Seita.4G228200/Seita.5G319100/Seita.9G227400/Seita.7G194800/Seita.7G319100/Seita.4G226900/Seita.1G057100/Seita.6G073000/Seita.8G091300/Seita.8G203200/Seita.4G099700/Seita.5G429100/Seita.8G083400/Seita.8G153700/Seita.9G410800/Seita.4G127200/Seita.4G211600/Seita.4G2…	50
Root.Cluster_C	MF	GO:0016722	oxidoreductase activity, oxidizing metal ions	20/2280	36/8539	0.000227844	0.0124693	0.0110543	Seita.3G084900/Seita.5G377700/Seita.5G378200/Seita.8G252500/Seita.9G453900/Seita.9G507200/Seita.4G282400/Seita.8G212900/Seita.5G271600/Seita.9G192300/Seita.5G382800/Seita.5G342100/Seita.5G238100/Seita.5G365900/Seita.7G330200/Seita.8G210900/Seita.8G018100/Seita.8G211000/Seita.8G212800/Seita.J004900	20
Root.Cluster_C	MF	GO:0042626	ATPase-coupled transmembrane transporter activity	45/2280	106/8539	0.000300799	0.0142658	0.0126469	Seita.7G194000/Seita.9G168300/Seita.9G187800/Seita.8G055700/Seita.6G049400/Seita.4G229700/Seita.1G049200/Seita.2G240500/Seita.3G193100/Seita.9G235900/Seita.2G335300/Seita.4G047900/Seita.5G185300/Seita.7G193900/Seita.7G228200/Seita.9G540800/Seita.9G543800/Seita.3G299000/Seita.7G039700/Seita.7G039900/Seita.2G179600/Seita.2G260700/Seita.3G260100/Seita.4G181500/Seita.5G221500/Seita.5G226500/Seita.5G2…	45
Root.Cluster_C	MF	GO:0043492	ATPase activity, coupled to movement of substances	47/2280	112/8539	0.000308066	0.0142658	0.0126469	Seita.7G194000/Seita.9G168300/Seita.9G187800/Seita.8G055700/Seita.6G049400/Seita.4G229700/Seita.1G049200/Seita.2G240500/Seita.3G193100/Seita.9G235900/Seita.2G335300/Seita.4G047900/Seita.5G185300/Seita.7G193900/Seita.7G228200/Seita.9G540800/Seita.9G543800/Seita.3G299000/Seita.7G039700/Seita.7G039900/Seita.2G179600/Seita.2G260700/Seita.3G260100/Seita.4G181500/Seita.5G221500/Seita.5G226500/Seita.5G2…	47
Root.Cluster_C	MF	GO:0022890	inorganic cation transmembrane transporter activity	91/2280	249/8539	0.00034566	0.0148634	0.0131766	Seita.7G194000/Seita.9G168300/Seita.2G432200/Seita.7G111600/Seita.1G175000/Seita.9G488700/Seita.3G208100/Seita.4G269800/Seita.7G156200/Seita.4G260900/Seita.7G230400/Seita.9G090100/Seita.9G523900/Seita.2G217600/Seita.5G192900/Seita.5G333000/Seita.7G235500/Seita.9G322100/Seita.5G024400/Seita.7G214000/Seita.7G148600/Seita.9G366600/Seita.1G049200/Seita.1G141800/Seita.3G193100/Seita.6G150900/Seita.9G2…	91
Root.Cluster_C	MF	GO:0022804	active transmembrane transporter activity	92/2280	253/8539	0.000391019	0.0156929	0.0139121	Seita.7G194000/Seita.9G168300/Seita.7G169400/Seita.9G187800/Seita.9G488700/Seita.9G523900/Seita.8G055700/Seita.9G322100/Seita.6G049400/Seita.4G229700/Seita.7G148600/Seita.1G049200/Seita.1G141800/Seita.2G240500/Seita.3G193100/Seita.9G235900/Seita.2G335300/Seita.3G102000/Seita.3G215300/Seita.3G356700/Seita.1G019500/Seita.1G041300/Seita.3G357700/Seita.4G047900/Seita.4G138500/Seita.5G039100/Seita.5G1…	92
Root.Cluster_C	MF	GO:0016709	oxidoreductase activity, acting on paired donors, with incorporation or reduction of molecular oxygen, NAD(P)H as one donor, and incorporation of one atom of oxygen	43/2280	102/8539	0.000485786	0.0163361	0.0144823	Seita.3G114000/Seita.9G242900/Seita.2G140600/Seita.6G061400/Seita.7G096800/Seita.9G257000/Seita.2G219600/Seita.2G224300/Seita.2G107500/Seita.5G044300/Seita.6G176900/Seita.2G229900/Seita.3G116300/Seita.6G237000/Seita.3G298400/Seita.7G116400/Seita.1G253000/Seita.5G040100/Seita.2G145700/Seita.2G145800/Seita.2G145900/Seita.2G283800/Seita.3G339800/Seita.4G145700/Seita.4G216300/Seita.4G235500/Seita.4G2…	43
Root.Cluster_C	MF	GO:0008236	serine-type peptidase activity	28/2280	59/8539	0.000488456	0.0163361	0.0144823	Seita.7G277500/Seita.5G285700/Seita.1G340400/Seita.6G235900/Seita.2G227100/Seita.2G218700/Seita.4G242700/Seita.7G269800/Seita.9G533900/Seita.7G206300/Seita.9G253700/Seita.2G109700/Seita.5G202300/Seita.1G046800/Seita.2G069000/Seita.2G069100/Seita.5G370200/Seita.7G203700/Seita.8G097000/Seita.9G262900/Seita.9G340500/Seita.9G376900/Seita.9G377000/Seita.9G377100/Seita.5G157800/Seita.5G303900/Seita.8G1…	28
Root.Cluster_C	MF	GO:0017171	serine hydrolase activity	28/2280	59/8539	0.000488456	0.0163361	0.0144823	Seita.7G277500/Seita.5G285700/Seita.1G340400/Seita.6G235900/Seita.2G227100/Seita.2G218700/Seita.4G242700/Seita.7G269800/Seita.9G533900/Seita.7G206300/Seita.9G253700/Seita.2G109700/Seita.5G202300/Seita.1G046800/Seita.2G069000/Seita.2G069100/Seita.5G370200/Seita.7G203700/Seita.8G097000/Seita.9G262900/Seita.9G340500/Seita.9G376900/Seita.9G377000/Seita.9G377100/Seita.5G157800/Seita.5G303900/Seita.8G1…	28
Root.Cluster_C	MF	GO:0016758	transferase activity, transferring hexosyl groups	88/2280	242/8539	0.00051844	0.0164264	0.0145623	Seita.2G356200/Seita.2G209100/Seita.3G194600/Seita.5G127500/Seita.2G080900/Seita.8G117700/Seita.8G192500/Seita.9G132100/Seita.3G077100/Seita.7G194300/Seita.8G192600/Seita.1G123500/Seita.1G179000/Seita.2G362400/Seita.3G217800/Seita.4G228200/Seita.5G319100/Seita.6G113400/Seita.9G227400/Seita.7G194800/Seita.7G319100/Seita.4G226900/Seita.5G388900/Seita.1G057100/Seita.4G108400/Seita.6G073000/Seita.8G0…	88
Root.Cluster_C	MF	GO:0004364	glutathione transferase activity	14/2280	23/8539	0.000581032	0.0174891	0.0155044	Seita.7G103100/Seita.3G038700/Seita.4G232000/Seita.9G446500/Seita.2G178900/Seita.9G064400/Seita.9G446400/Seita.3G060800/Seita.6G153400/Seita.9G446300/Seita.2G033500/Seita.9G157600/Seita.5G442000/Seita.9G261500	14
Root.Cluster_C	MF	GO:0046873	metal ion transmembrane transporter activity	61/2280	158/8539	0.000651578	0.0179835	0.0159427	Seita.7G194000/Seita.9G168300/Seita.2G432200/Seita.7G111600/Seita.1G175000/Seita.3G208100/Seita.4G269800/Seita.7G156200/Seita.4G260900/Seita.7G230400/Seita.9G090100/Seita.2G217600/Seita.5G192900/Seita.5G333000/Seita.7G235500/Seita.5G024400/Seita.7G214000/Seita.9G366600/Seita.1G049200/Seita.1G141800/Seita.3G193100/Seita.6G150900/Seita.3G215300/Seita.7G288300/Seita.1G019500/Seita.3G049900/Seita.4G1…	61
Root.Cluster_C	MF	GO:0080043	quercetin 3-O-glucosyltransferase activity	24/2280	49/8539	0.000687078	0.0179835	0.0159427	Seita.3G194600/Seita.5G127500/Seita.8G117700/Seita.8G192500/Seita.3G077100/Seita.8G192600/Seita.4G228200/Seita.7G319100/Seita.4G226900/Seita.1G057100/Seita.6G073000/Seita.8G091300/Seita.8G203200/Seita.8G153700/Seita.4G127200/Seita.5G274700/Seita.4G120200/Seita.1G245200/Seita.3G194500/Seita.4G121900/Seita.7G079000/Seita.7G318900/Seita.1G089800/Seita.4G227100	24
Root.Cluster_C	MF	GO:0080044	quercetin 7-O-glucosyltransferase activity	24/2280	49/8539	0.000687078	0.0179835	0.0159427	Seita.3G194600/Seita.5G127500/Seita.8G117700/Seita.8G192500/Seita.3G077100/Seita.8G192600/Seita.4G228200/Seita.7G319100/Seita.4G226900/Seita.1G057100/Seita.6G073000/Seita.8G091300/Seita.8G203200/Seita.8G153700/Seita.4G127200/Seita.5G274700/Seita.4G120200/Seita.1G245200/Seita.3G194500/Seita.4G121900/Seita.7G079000/Seita.7G318900/Seita.1G089800/Seita.4G227100	24
Root.Cluster_C	MF	GO:0015267	channel activity	41/2280	98/8539	0.000782347	0.0188389	0.016701	Seita.1G318800/Seita.9G168300/Seita.5G469800/Seita.7G111600/Seita.7G170200/Seita.9G541300/Seita.4G089800/Seita.4G260900/Seita.5G007500/Seita.3G082100/Seita.7G214000/Seita.1G025100/Seita.2G123200/Seita.1G372300/Seita.7G288300/Seita.1G272900/Seita.3G094900/Seita.5G270100/Seita.8G118200/Seita.9G576300/Seita.1G266400/Seita.5G189900/Seita.8G008600/Seita.9G085500/Seita.9G208400/Seita.1G259900/Seita.2G1…	41
Root.Cluster_C	MF	GO:0022803	passive transmembrane transporter activity	41/2280	98/8539	0.000782347	0.0188389	0.016701	Seita.1G318800/Seita.9G168300/Seita.5G469800/Seita.7G111600/Seita.7G170200/Seita.9G541300/Seita.4G089800/Seita.4G260900/Seita.5G007500/Seita.3G082100/Seita.7G214000/Seita.1G025100/Seita.2G123200/Seita.1G372300/Seita.7G288300/Seita.1G272900/Seita.3G094900/Seita.5G270100/Seita.8G118200/Seita.9G576300/Seita.1G266400/Seita.5G189900/Seita.8G008600/Seita.9G085500/Seita.9G208400/Seita.1G259900/Seita.2G1…	41
Root.Cluster_C	MF	GO:0004674	protein serine/threonine kinase activity	152/2280	459/8539	0.0010328	0.0239134	0.0211996	Seita.3G408600/Seita.4G256000/Seita.9G165400/Seita.9G283800/Seita.9G429400/Seita.3G006400/Seita.4G049800/Seita.5G181100/Seita.5G411100/Seita.8G014400/Seita.9G341400/Seita.3G160700/Seita.3G246700/Seita.9G117700/Seita.1G118600/Seita.1G239600/Seita.1G305000/Seita.2G182200/Seita.2G219000/Seita.2G392700/Seita.3G123700/Seita.4G122300/Seita.4G127700/Seita.4G286900/Seita.5G235700/Seita.5G404500/Seita.6G0…	152
Root.Cluster_C	MF	GO:0016705	oxidoreductase activity, acting on paired donors, with incorporation or reduction of molecular oxygen	61/2280	162/8539	0.00135398	0.0295906	0.0262326	Seita.3G114000/Seita.9G242900/Seita.2G140600/Seita.6G061400/Seita.6G205100/Seita.7G096800/Seita.9G257000/Seita.2G219600/Seita.2G224300/Seita.2G107500/Seita.5G044300/Seita.6G176900/Seita.2G229900/Seita.2G253700/Seita.3G116300/Seita.6G237000/Seita.7G162900/Seita.7G171000/Seita.7G171100/Seita.3G298400/Seita.5G130100/Seita.5G130200/Seita.7G116400/Seita.1G253000/Seita.5G040100/Seita.1G265100/Seita.2G1…	61
Root.Cluster_C	MF	GO:0050734	hydroxycinnamoyltransferase activity	10/2280	15/8539	0.00137631	0.0295906	0.0262326	Seita.9G249300/Seita.9G249200/Seita.5G069500/Seita.3G028200/Seita.5G434700/Seita.7G047600/Seita.2G293600/Seita.2G293700/Seita.8G128800/Seita.1G230100	10
Root.Cluster_C	MF	GO:0016645	oxidoreductase activity, acting on the CH-NH group of donors	18/2280	35/8539	0.00156243	0.0324339	0.0287533	Seita.5G020700/Seita.5G447700/Seita.9G396700/Seita.2G056500/Seita.3G165100/Seita.9G192300/Seita.5G291400/Seita.2G178100/Seita.2G260500/Seita.9G330700/Seita.2G223900/Seita.3G356600/Seita.5G337500/Seita.5G455900/Seita.6G174400/Seita.5G020900/Seita.9G507500/Seita.3G020400	18
Root.Cluster_C	MF	GO:0016757	transferase activity, transferring glycosyl groups	98/2280	283/8539	0.00169511	0.0340151	0.030155	Seita.2G356200/Seita.2G209100/Seita.3G194600/Seita.5G127500/Seita.2G080900/Seita.8G117700/Seita.8G192500/Seita.9G132100/Seita.3G077100/Seita.7G194300/Seita.8G192600/Seita.1G123500/Seita.1G179000/Seita.2G362400/Seita.3G046000/Seita.3G217800/Seita.4G228200/Seita.5G319100/Seita.6G113400/Seita.9G227400/Seita.7G194800/Seita.7G319100/Seita.4G226900/Seita.5G388900/Seita.7G157900/Seita.1G057100/Seita.4G1…	98
Root.Cluster_C	MF	GO:0008324	cation transmembrane transporter activity	99/2280	288/8539	0.00209701	0.0407226	0.0361013	Seita.7G194000/Seita.9G168300/Seita.2G432200/Seita.7G111600/Seita.1G175000/Seita.9G488700/Seita.3G208100/Seita.4G269800/Seita.7G156200/Seita.4G260900/Seita.5G127600/Seita.7G230400/Seita.9G090100/Seita.9G523900/Seita.2G217600/Seita.5G192900/Seita.5G333000/Seita.7G235500/Seita.9G322100/Seita.5G024400/Seita.7G214000/Seita.7G148600/Seita.9G366600/Seita.1G049200/Seita.1G141800/Seita.3G193100/Seita.6G1…	99
Root.Cluster_C	MF	GO:0016759	cellulose synthase activity	11/2280	18/8539	0.0022067	0.0413424	0.0366508	Seita.2G209100/Seita.2G080900/Seita.5G319100/Seita.9G227400/Seita.4G211600/Seita.5G122700/Seita.1G268900/Seita.4G223900/Seita.7G098500/Seita.4G213700/Seita.9G173700	11
Root.Cluster_C	MF	GO:0008509	anion transmembrane transporter activity	83/2280	236/8539	0.00226628	0.0413424	0.0366508	Seita.1G318800/Seita.7G185900/Seita.1G115700/Seita.1G115800/Seita.1G116000/Seita.1G116100/Seita.1G218600/Seita.7G169400/Seita.9G288200/Seita.9G561400/Seita.5G127600/Seita.7G298300/Seita.4G032500/Seita.5G051800/Seita.2G090200/Seita.9G506300/Seita.9G101800/Seita.9G299000/Seita.2G240500/Seita.7G157900/Seita.9G235900/Seita.9G277500/Seita.3G102000/Seita.1G041300/Seita.1G268000/Seita.5G026800/Seita.7G0…	83
Root.Cluster_C	MF	GO:0051536	iron-sulfur cluster binding	23/2280	50/8539	0.0025433	0.0437447	0.0387805	Seita.6G002300/Seita.9G353200/Seita.1G034000/Seita.2G442100/Seita.3G351700/Seita.5G299100/Seita.3G281700/Seita.7G028400/Seita.1G134200/Seita.2G309200/Seita.5G165100/Seita.9G140100/Seita.9G192300/Seita.3G330000/Seita.9G436700/Seita.5G342100/Seita.9G149700/Seita.2G110300/Seita.3G084500/Seita.3G386300/Seita.7G124600/Seita.3G009500/Seita.9G037300	23
Root.Cluster_C	MF	GO:0051540	metal cluster binding	23/2280	50/8539	0.0025433	0.0437447	0.0387805	Seita.6G002300/Seita.9G353200/Seita.1G034000/Seita.2G442100/Seita.3G351700/Seita.5G299100/Seita.3G281700/Seita.7G028400/Seita.1G134200/Seita.2G309200/Seita.5G165100/Seita.9G140100/Seita.9G192300/Seita.3G330000/Seita.9G436700/Seita.5G342100/Seita.9G149700/Seita.2G110300/Seita.3G084500/Seita.3G386300/Seita.7G124600/Seita.3G009500/Seita.9G037300	23
Root.Cluster_C	MF	GO:0005388	calcium transmembrane transporter activity, phosphorylative mechanism	10/2280	16/8539	0.00279455	0.0467312	0.041428	Seita.7G194000/Seita.9G168300/Seita.1G049200/Seita.3G193100/Seita.7G193900/Seita.7G228200/Seita.2G260700/Seita.1G067000/Seita.6G214700/Seita.8G025400	10
Root.Cluster_C	MF	GO:0015112	nitrate transmembrane transporter activity	14/2280	26/8539	0.00296665	0.0482681	0.0427906	Seita.1G115700/Seita.1G115800/Seita.1G116000/Seita.1G116100/Seita.1G218600/Seita.9G101800/Seita.5G198500/Seita.1G278500/Seita.1G114900/Seita.3G406500/Seita.5G326900/Seita.6G058300/Seita.9G327900/Seita.J031500	14
Root.Cluster_D	BP	GO:0009834	plant-type secondary cell wall biogenesis	12/342	73/9983	6.03404e-06	0.00969067	0.00969067	Seita.1G080900/Seita.1G309600/Seita.3G046000/Seita.3G136800/Seita.3G217800/Seita.4G115200/Seita.5G242700/Seita.5G319100/Seita.6G003700/Seita.8G252500/Seita.9G227400/Seita.1G281500	12
Root.Cluster_E	MF	GO:0004568	chitinase activity	5/158	12/8539	1.45217e-06	0.000399346	0.000360749	Seita.4G286000/Seita.7G150600/Seita.7G150300/Seita.7G150400/Seita.7G150500	5
Root.Cluster_E	MF	GO:0080043	quercetin 3-O-glucosyltransferase activity	6/158	49/8539	0.000264408	0.0242374	0.0218948	Seita.7G319100/Seita.4G226900/Seita.1G057100/Seita.6G073000/Seita.8G091300/Seita.8G203200	6
Root.Cluster_E	MF	GO:0080044	quercetin 7-O-glucosyltransferase activity	6/158	49/8539	0.000264408	0.0242374	0.0218948	Seita.7G319100/Seita.4G226900/Seita.1G057100/Seita.6G073000/Seita.8G091300/Seita.8G203200	6
Root.Cluster_E	MF	GO:0015318	inorganic molecular entity transmembrane transporter activity	20/158	478/8539	0.000497777	0.0342221	0.0309145	Seita.1G025100/Seita.2G123200/Seita.7G148600/Seita.9G101800/Seita.9G299000/Seita.9G366600/Seita.1G049200/Seita.1G141800/Seita.2G240500/Seita.3G193100/Seita.6G150900/Seita.7G157900/Seita.9G088000/Seita.9G235900/Seita.9G277500/Seita.1G372300/Seita.3G102000/Seita.3G215300/Seita.3G356700/Seita.7G288300	20
Root.Cluster_E	MF	GO:0004364	glutathione transferase activity	4/158	23/8539	0.000759404	0.0354203	0.0319969	Seita.3G038700/Seita.4G232000/Seita.9G446500/Seita.2G178900	4
Root.Cluster_E	MF	GO:0035251	UDP-glucosyltransferase activity	7/158	82/8539	0.000772806	0.0354203	0.0319969	Seita.7G194800/Seita.7G319100/Seita.4G226900/Seita.1G057100/Seita.6G073000/Seita.8G091300/Seita.8G203200	7
Root.Cluster_E	MF	GO:0043295	glutathione binding	3/158	12/8539	0.00120954	0.0415778	0.0375593	Seita.3G038700/Seita.4G232000/Seita.2G178900	3
Root.Cluster_E	MF	GO:1900750	oligopeptide binding	3/158	12/8539	0.00120954	0.0415778	0.0375593	Seita.3G038700/Seita.4G232000/Seita.2G178900	3
Root.Cluster_F	CC	GO:0000325	plant-type vacuole	14/192	214/9955	6.58852e-05	0.00961923	0.00859975	Seita.3G147300/Seita.6G038200/Seita.6G038500/Seita.1G115700/Seita.1G115800/Seita.1G116000/Seita.1G116100/Seita.5G201900/Seita.5G469800/Seita.7G205800/Seita.9G541300/Seita.6G038100/Seita.4G269800/Seita.9G561400	14
Root.Cluster_F	CC	GO:1990351	transporter complex	4/192	18/9955	0.000331982	0.0151185	0.0135162	Seita.1G115700/Seita.1G115800/Seita.1G116000/Seita.1G116100	4
Root.Cluster_F	CC	GO:0009705	plant-type vacuole membrane	10/192	142/9955	0.000412949	0.0151185	0.0135162	Seita.3G147300/Seita.1G115700/Seita.1G115800/Seita.1G116000/Seita.1G116100/Seita.5G469800/Seita.7G205800/Seita.9G541300/Seita.4G269800/Seita.9G561400	10
Root.Cluster_F	CC	GO:0009531	secondary cell wall	4/192	19/9955	0.000414205	0.0151185	0.0135162	Seita.1G318800/Seita.6G002300/Seita.7G196300/Seita.1G344700	4
Root.Cluster_F	CC	GO:0005887	integral component of plasma membrane	12/192	211/9955	0.000783071	0.0228657	0.0204423	Seita.1G318800/Seita.6G022400/Seita.7G194000/Seita.9G168300/Seita.9G172600/Seita.5G469800/Seita.7G111600/Seita.7G170200/Seita.9G541300/Seita.2G211200/Seita.4G089800/Seita.9G276900	12
Root.Cluster_F	CC	GO:0048226	Casparian strip	3/192	11/9955	0.00103966	0.0252985	0.0226173	Seita.1G318800/Seita.6G002300/Seita.1G344700	3
Root.Cluster_F	CC	GO:0005774	vacuolar membrane	19/192	466/9955	0.00163471	0.0337409	0.0301649	Seita.3G147300/Seita.1G115700/Seita.1G115800/Seita.1G116000/Seita.1G116100/Seita.1G323900/Seita.2G090500/Seita.2G199400/Seita.3G408300/Seita.5G469800/Seita.7G004600/Seita.7G205800/Seita.8G203400/Seita.9G541300/Seita.5G279400/Seita.1G340400/Seita.3G113800/Seita.4G269800/Seita.9G561400	19
Root.Cluster_F	CC	GO:0031226	intrinsic component of plasma membrane	15/192	331/9955	0.00184882	0.0337409	0.0301649	Seita.1G318800/Seita.6G022400/Seita.7G194000/Seita.9G168300/Seita.9G172600/Seita.2G199400/Seita.5G469800/Seita.7G111600/Seita.7G170200/Seita.9G541300/Seita.2G211200/Seita.9G060800/Seita.4G022300/Seita.4G089800/Seita.9G276900	15
Root.Cluster_F	MF	GO:0015112	nitrate transmembrane transporter activity	5/182	26/8539	0.000190335	0.0360291	0.034795	Seita.1G115700/Seita.1G115800/Seita.1G116000/Seita.1G116100/Seita.1G218600	5
Root.Cluster_F	MF	GO:0015318	inorganic molecular entity transmembrane transporter activity	22/182	478/8539	0.00050732	0.0360291	0.034795	Seita.1G318800/Seita.7G185900/Seita.7G194000/Seita.9G168300/Seita.1G115700/Seita.1G115800/Seita.1G116000/Seita.1G116100/Seita.1G218600/Seita.2G432200/Seita.5G469800/Seita.7G111600/Seita.7G170200/Seita.9G541300/Seita.1G175000/Seita.9G288200/Seita.9G488700/Seita.3G208100/Seita.4G089800/Seita.4G269800/Seita.7G156200/Seita.9G561400	22
Root.Cluster_F	MF	GO:0080043	quercetin 3-O-glucosyltransferase activity	6/182	49/8539	0.000563866	0.0360291	0.034795	Seita.3G194600/Seita.5G127500/Seita.8G117700/Seita.8G192500/Seita.3G077100/Seita.8G192600	6
Root.Cluster_F	MF	GO:0080044	quercetin 7-O-glucosyltransferase activity	6/182	49/8539	0.000563866	0.0360291	0.034795	Seita.3G194600/Seita.5G127500/Seita.8G117700/Seita.8G192500/Seita.3G077100/Seita.8G192600	6
Root.Cluster_F	MF	GO:0005372	water transmembrane transporter activity	5/182	34/8539	0.000701349	0.0360291	0.034795	Seita.1G318800/Seita.5G469800/Seita.7G170200/Seita.9G541300/Seita.4G089800	5
Root.Cluster_F	MF	GO:0015250	water channel activity	5/182	34/8539	0.000701349	0.0360291	0.034795	Seita.1G318800/Seita.5G469800/Seita.7G170200/Seita.9G541300/Seita.4G089800	5
Root.Cluster_F	MF	GO:0046527	glucosyltransferase activity	9/182	116/8539	0.000800647	0.0360291	0.034795	Seita.2G209100/Seita.3G194600/Seita.5G127500/Seita.2G080900/Seita.8G117700/Seita.8G192500/Seita.3G077100/Seita.7G194300/Seita.8G192600	9
Stem.Cluster_A	BP	GO:0042254	ribosome biogenesis	31/379	256/9983	9.16731e-09	1.31843e-05	1.28196e-05	Seita.1G214900/Seita.2G267400/Seita.2G389700/Seita.3G143200/Seita.3G277300/Seita.4G122000/Seita.5G003200/Seita.5G131500/Seita.6G231500/Seita.7G134600/Seita.8G046000/Seita.8G161700/Seita.9G082100/Seita.9G087300/Seita.9G414500/Seita.2G048400/Seita.2G404800/Seita.3G280800/Seita.4G177300/Seita.6G017200/Seita.6G224900/Seita.7G064700/Seita.7G099000/Seita.7G166100/Seita.7G228400/Seita.9G057400/Seita.9G1…	31
Stem.Cluster_A	BP	GO:0000470	maturation of LSU-rRNA	10/379	26/9983	1.7045e-08	1.31843e-05	1.28196e-05	Seita.2G267400/Seita.3G143200/Seita.4G122000/Seita.6G231500/Seita.4G177300/Seita.6G017200/Seita.6G224900/Seita.7G064700/Seita.7G228400/Seita.9G128300	10
Stem.Cluster_A	BP	GO:0043043	peptide biosynthetic process	34/379	325/9983	7.0314e-08	2.75891e-05	2.6826e-05	Seita.1G214900/Seita.2G055300/Seita.2G079700/Seita.2G143900/Seita.2G267400/Seita.2G389700/Seita.3G035800/Seita.3G111700/Seita.3G162800/Seita.3G175700/Seita.3G197300/Seita.3G264300/Seita.4G122000/Seita.6G053600/Seita.6G231500/Seita.7G134600/Seita.8G046000/Seita.9G044700/Seita.9G476100/Seita.9G544700/Seita.2G048400/Seita.2G362700/Seita.3G280800/Seita.4G023300/Seita.4G177300/Seita.6G017200/Seita.6G0…	34
Stem.Cluster_A	BP	GO:0043604	amide biosynthetic process	37/379	374/9983	7.80951e-08	2.75891e-05	2.6826e-05	Seita.1G214900/Seita.2G055300/Seita.2G079700/Seita.2G143900/Seita.2G267400/Seita.2G389700/Seita.3G035800/Seita.3G111700/Seita.3G162800/Seita.3G175700/Seita.3G197300/Seita.3G264300/Seita.4G122000/Seita.6G053600/Seita.6G231500/Seita.7G134600/Seita.7G280800/Seita.8G046000/Seita.9G044700/Seita.9G323200/Seita.9G476100/Seita.9G544700/Seita.2G048400/Seita.2G362700/Seita.3G280800/Seita.4G023300/Seita.4G1…	37
Stem.Cluster_A	BP	GO:0006412	translation	33/379	315/9983	1.07004e-07	2.75891e-05	2.6826e-05	Seita.1G214900/Seita.2G055300/Seita.2G079700/Seita.2G143900/Seita.2G267400/Seita.2G389700/Seita.3G035800/Seita.3G111700/Seita.3G162800/Seita.3G175700/Seita.3G197300/Seita.3G264300/Seita.4G122000/Seita.6G053600/Seita.6G231500/Seita.7G134600/Seita.8G046000/Seita.9G044700/Seita.9G544700/Seita.2G048400/Seita.2G362700/Seita.3G280800/Seita.4G023300/Seita.4G177300/Seita.6G017200/Seita.6G085600/Seita.6G2…	33
Stem.Cluster_A	BP	GO:0022613	ribonucleoprotein complex biogenesis	33/379	315/9983	1.07004e-07	2.75891e-05	2.6826e-05	Seita.1G214900/Seita.2G267400/Seita.2G389700/Seita.3G143200/Seita.3G277300/Seita.4G122000/Seita.5G003200/Seita.5G131500/Seita.6G231500/Seita.7G134600/Seita.8G046000/Seita.8G161700/Seita.9G082100/Seita.9G087300/Seita.9G414500/Seita.9G436100/Seita.2G048400/Seita.2G404800/Seita.3G280800/Seita.4G177300/Seita.6G017200/Seita.6G224900/Seita.7G064700/Seita.7G099000/Seita.7G166100/Seita.7G228400/Seita.9G0…	33
Stem.Cluster_A	BP	GO:0006364	rRNA processing	22/379	162/9983	1.87424e-07	4.14207e-05	4.0275e-05	Seita.2G267400/Seita.2G389700/Seita.3G143200/Seita.4G122000/Seita.5G003200/Seita.5G131500/Seita.6G231500/Seita.8G161700/Seita.9G414500/Seita.2G404800/Seita.3G280800/Seita.4G177300/Seita.6G017200/Seita.6G224900/Seita.7G064700/Seita.7G228400/Seita.9G057400/Seita.9G128300/Seita.9G131800/Seita.9G404600/Seita.9G404700/Seita.9G517100	22
Stem.Cluster_A	BP	GO:0042273	ribosomal large subunit biogenesis	14/379	74/9983	5.81816e-07	0.000112509	0.000109397	Seita.1G214900/Seita.2G267400/Seita.3G143200/Seita.4G122000/Seita.6G231500/Seita.7G134600/Seita.8G046000/Seita.4G177300/Seita.6G017200/Seita.6G224900/Seita.7G064700/Seita.7G166100/Seita.7G228400/Seita.9G128300	14
Stem.Cluster_A	BP	GO:0016072	rRNA metabolic process	22/379	174/9983	6.6107e-07	0.000113631	0.000110488	Seita.2G267400/Seita.2G389700/Seita.3G143200/Seita.4G122000/Seita.5G003200/Seita.5G131500/Seita.6G231500/Seita.8G161700/Seita.9G414500/Seita.2G404800/Seita.3G280800/Seita.4G177300/Seita.6G017200/Seita.6G224900/Seita.7G064700/Seita.7G228400/Seita.9G057400/Seita.9G128300/Seita.9G131800/Seita.9G404600/Seita.9G404700/Seita.9G517100	22
Stem.Cluster_A	BP	GO:0006518	peptide metabolic process	35/379	378/9983	8.7652e-07	0.000135598	0.000131847	Seita.1G214900/Seita.2G055300/Seita.2G079700/Seita.2G143900/Seita.2G267400/Seita.2G389700/Seita.3G035800/Seita.3G111700/Seita.3G162800/Seita.3G175700/Seita.3G197300/Seita.3G264300/Seita.4G122000/Seita.6G053600/Seita.6G231500/Seita.7G134600/Seita.8G046000/Seita.9G044700/Seita.9G476100/Seita.9G544700/Seita.2G048400/Seita.2G362700/Seita.3G280800/Seita.4G023300/Seita.4G177300/Seita.6G017200/Seita.6G0…	35
Stem.Cluster_A	BP	GO:0043603	cellular amide metabolic process	40/379	469/9983	1.1834e-06	0.000166429	0.000161826	Seita.1G214900/Seita.2G055300/Seita.2G079700/Seita.2G143900/Seita.2G267400/Seita.2G389700/Seita.3G035800/Seita.3G047800/Seita.3G111700/Seita.3G162800/Seita.3G175700/Seita.3G197300/Seita.3G264300/Seita.4G122000/Seita.6G053600/Seita.6G231500/Seita.7G134600/Seita.7G280800/Seita.8G046000/Seita.9G044700/Seita.9G323200/Seita.9G476100/Seita.9G544700/Seita.2G048400/Seita.2G362700/Seita.3G280800/Seita.4G0…	40
Stem.Cluster_A	BP	GO:0009642	response to light intensity	17/379	127/9983	5.74774e-06	0.000688162	0.000669128	Seita.1G012200/Seita.1G045200/Seita.2G335600/Seita.3G175700/Seita.5G014300/Seita.5G021800/Seita.5G092400/Seita.7G280800/Seita.9G488400/Seita.5G207000/Seita.9G272800/Seita.9G457400/Seita.2G053800/Seita.2G164500/Seita.3G158600/Seita.7G087700/Seita.9G470600	17
Stem.Cluster_A	BP	GO:0009408	response to heat	22/379	199/9983	6.3428e-06	0.000688162	0.000669128	Seita.1G012200/Seita.1G045200/Seita.1G203200/Seita.1G324300/Seita.3G175700/Seita.3G242900/Seita.4G267900/Seita.5G092400/Seita.5G093000/Seita.5G131300/Seita.5G137400/Seita.9G157700/Seita.9G488400/Seita.5G207000/Seita.5G403700/Seita.9G106800/Seita.1G162500/Seita.1G342400/Seita.2G053800/Seita.5G131400/Seita.7G060200/Seita.9G470600	22
Stem.Cluster_A	BP	GO:0002181	cytoplasmic translation	11/379	56/9983	6.52929e-06	0.000688162	0.000669128	Seita.1G214900/Seita.2G055300/Seita.3G197300/Seita.6G231500/Seita.7G134600/Seita.3G280800/Seita.4G023300/Seita.6G017200/Seita.6G085600/Seita.7G228400/Seita.9G502500	11
Stem.Cluster_A	BP	GO:0000463	maturation of LSU-rRNA from tricistronic rRNA transcript (SSU-rRNA, 5.8S rRNA, LSU-rRNA)	6/379	14/9983	6.67255e-06	0.000688162	0.000669128	Seita.3G143200/Seita.6G231500/Seita.6G017200/Seita.7G064700/Seita.7G228400/Seita.9G128300	6
Stem.Cluster_A	BP	GO:0009415	response to water	31/379	347/9983	7.92617e-06	0.000766362	0.000745165	Seita.1G324300/Seita.3G144000/Seita.3G162400/Seita.5G166200/Seita.5G166300/Seita.5G351300/Seita.6G114000/Seita.6G178100/Seita.7G039700/Seita.7G121500/Seita.7G184600/Seita.7G228200/Seita.8G008100/Seita.8G115200/Seita.8G115400/Seita.8G121700/Seita.8G125500/Seita.9G039200/Seita.9G157700/Seita.9G198800/Seita.9G229700/Seita.9G410800/Seita.9G420500/Seita.9G544600/Seita.1G267200/Seita.2G035400/Seita.3G1…	31
Stem.Cluster_A	BP	GO:0009414	response to water deprivation	30/379	340/9983	1.42108e-05	0.00129319	0.00125742	Seita.1G324300/Seita.3G144000/Seita.3G162400/Seita.5G166200/Seita.5G166300/Seita.5G351300/Seita.6G114000/Seita.6G178100/Seita.7G039700/Seita.7G121500/Seita.7G184600/Seita.7G228200/Seita.8G115200/Seita.8G115400/Seita.8G121700/Seita.8G125500/Seita.9G039200/Seita.9G157700/Seita.9G198800/Seita.9G229700/Seita.9G410800/Seita.9G420500/Seita.9G544600/Seita.1G267200/Seita.2G035400/Seita.3G157100/Seita.3G1…	30
Stem.Cluster_A	BP	GO:0034470	ncRNA processing	24/379	252/9983	3.06427e-05	0.00263357	0.00256073	Seita.1G266700/Seita.2G267400/Seita.2G389700/Seita.3G143200/Seita.4G122000/Seita.4G147000/Seita.5G003200/Seita.5G131500/Seita.6G231500/Seita.8G161700/Seita.9G414500/Seita.2G404800/Seita.3G280800/Seita.4G177300/Seita.6G017200/Seita.6G224900/Seita.7G064700/Seita.7G228400/Seita.9G057400/Seita.9G128300/Seita.9G131800/Seita.9G404600/Seita.9G404700/Seita.9G517100	24
Stem.Cluster_A	BP	GO:0009631	cold acclimation	8/379	35/9983	3.83114e-05	0.00311936	0.00303308	Seita.1G192100/Seita.3G144000/Seita.5G166200/Seita.5G166300/Seita.7G102200/Seita.8G115200/Seita.8G115400/Seita.1G267200	8
Stem.Cluster_A	BP	GO:0009644	response to high light intensity	12/379	80/9983	4.39562e-05	0.00340002	0.00330597	Seita.1G012200/Seita.1G045200/Seita.3G175700/Seita.5G014300/Seita.5G092400/Seita.9G488400/Seita.5G207000/Seita.9G272800/Seita.9G457400/Seita.2G053800/Seita.2G164500/Seita.9G470600	12
Stem.Cluster_A	BP	GO:0006979	response to oxidative stress	29/379	380/9983	0.000264022	0.0193967	0.0188602	Seita.1G012200/Seita.1G045200/Seita.1G192100/Seita.1G210300/Seita.2G081000/Seita.3G111700/Seita.3G175700/Seita.4G169900/Seita.5G092400/Seita.5G342100/Seita.6G072900/Seita.7G102200/Seita.9G043300/Seita.9G157700/Seita.9G198800/Seita.9G319200/Seita.9G488400/Seita.J011900/Seita.1G335200/Seita.3G160800/Seita.5G207000/Seita.5G393400/Seita.9G183600/Seita.3G099600/Seita.3G192300/Seita.7G126300/Seita.9G07…	29
Stem.Cluster_A	BP	GO:0043200	response to amino acid	6/379	25/9983	0.000275842	0.0193967	0.0188602	Seita.2G352600/Seita.3G035800/Seita.5G166200/Seita.5G166300/Seita.8G115200/Seita.8G115400	6
Stem.Cluster_A	BP	GO:0000154	rRNA modification	7/379	36/9983	0.000345918	0.0232668	0.0226232	Seita.3G143200/Seita.4G122000/Seita.8G161700/Seita.2G404800/Seita.9G057400/Seita.9G404600/Seita.9G404700	7
Stem.Cluster_A	BP	GO:0034660	ncRNA metabolic process	25/379	322/9983	0.000541527	0.0349059	0.0339405	Seita.1G266700/Seita.2G267400/Seita.2G389700/Seita.3G035800/Seita.3G143200/Seita.4G122000/Seita.4G147000/Seita.5G003200/Seita.5G131500/Seita.6G231500/Seita.8G161700/Seita.9G414500/Seita.2G404800/Seita.3G280800/Seita.4G177300/Seita.6G017200/Seita.6G224900/Seita.7G064700/Seita.7G228400/Seita.9G057400/Seita.9G128300/Seita.9G131800/Seita.9G404600/Seita.9G404700/Seita.9G517100	25
Stem.Cluster_A	CC	GO:0042788	polysomal ribosome	19/366	58/9955	8.89932e-14	1.84197e-11	1.60249e-11	Seita.2G055300/Seita.2G079700/Seita.2G267400/Seita.2G389700/Seita.3G197300/Seita.6G112100/Seita.8G046000/Seita.9G044700/Seita.3G280800/Seita.4G177300/Seita.6G017200/Seita.6G085600/Seita.6G224900/Seita.7G099000/Seita.7G166100/Seita.7G228400/Seita.9G131800/Seita.9G502500/Seita.9G517100	19
Stem.Cluster_A	CC	GO:0044391	ribosomal subunit	30/366	163/9955	1.68217e-13	1.84197e-11	1.60249e-11	Seita.1G214900/Seita.2G055300/Seita.2G079700/Seita.2G143900/Seita.2G267400/Seita.2G389700/Seita.3G162800/Seita.3G197300/Seita.6G112100/Seita.6G231500/Seita.7G134600/Seita.8G046000/Seita.9G044700/Seita.9G544700/Seita.2G048400/Seita.2G362700/Seita.3G280800/Seita.4G023300/Seita.4G177300/Seita.6G017200/Seita.6G085600/Seita.6G224900/Seita.7G064700/Seita.7G099000/Seita.7G166100/Seita.7G228400/Seita.7G2…	30
Stem.Cluster_A	CC	GO:0022626	cytosolic ribosome	29/366	173/9955	5.0339e-12	3.67475e-10	3.19697e-10	Seita.1G214900/Seita.2G055300/Seita.2G079700/Seita.2G267400/Seita.2G389700/Seita.3G162800/Seita.3G197300/Seita.6G112100/Seita.6G231500/Seita.7G134600/Seita.8G046000/Seita.9G044700/Seita.9G544700/Seita.2G048400/Seita.2G362700/Seita.3G280800/Seita.4G023300/Seita.4G177300/Seita.6G017200/Seita.6G085600/Seita.6G224900/Seita.7G064700/Seita.7G099000/Seita.7G166100/Seita.7G228400/Seita.7G234800/Seita.9G1…	29
Stem.Cluster_A	CC	GO:0005844	polysome	19/366	72/9955	6.89716e-12	3.77619e-10	3.28522e-10	Seita.2G055300/Seita.2G079700/Seita.2G267400/Seita.2G389700/Seita.3G197300/Seita.6G112100/Seita.8G046000/Seita.9G044700/Seita.3G280800/Seita.4G177300/Seita.6G017200/Seita.6G085600/Seita.6G224900/Seita.7G099000/Seita.7G166100/Seita.7G228400/Seita.9G131800/Seita.9G502500/Seita.9G517100	19
Stem.Cluster_A	CC	GO:0005840	ribosome	30/366	215/9955	2.44678e-10	1.07169e-08	9.32353e-09	Seita.1G214900/Seita.2G055300/Seita.2G079700/Seita.2G143900/Seita.2G267400/Seita.2G389700/Seita.3G162800/Seita.3G197300/Seita.6G112100/Seita.6G231500/Seita.7G134600/Seita.8G046000/Seita.9G044700/Seita.9G544700/Seita.2G048400/Seita.2G362700/Seita.3G280800/Seita.4G023300/Seita.4G177300/Seita.6G017200/Seita.6G085600/Seita.6G224900/Seita.7G064700/Seita.7G099000/Seita.7G166100/Seita.7G228400/Seita.7G2…	30
Stem.Cluster_A	CC	GO:0005730	nucleolus	43/366	436/9955	2.59508e-09	9.47203e-08	8.24051e-08	Seita.1G210300/Seita.1G214900/Seita.2G055300/Seita.2G079700/Seita.2G267400/Seita.3G143200/Seita.4G122000/Seita.4G159500/Seita.5G003200/Seita.5G059300/Seita.5G131500/Seita.6G112100/Seita.6G123500/Seita.6G145100/Seita.6G231500/Seita.7G134600/Seita.8G046000/Seita.8G161700/Seita.9G044700/Seita.9G087300/Seita.9G414500/Seita.9G436100/Seita.2G048400/Seita.2G278900/Seita.2G362700/Seita.2G385500/Seita.2G4…	43
Stem.Cluster_A	CC	GO:0022625	cytosolic large ribosomal subunit	17/366	80/9955	3.45695e-09	1.08153e-07	9.40913e-08	Seita.1G214900/Seita.2G055300/Seita.2G267400/Seita.3G162800/Seita.3G197300/Seita.6G112100/Seita.6G231500/Seita.7G134600/Seita.8G046000/Seita.9G544700/Seita.4G177300/Seita.6G017200/Seita.6G085600/Seita.6G224900/Seita.7G064700/Seita.7G166100/Seita.7G228400	17
Stem.Cluster_A	CC	GO:1990904	ribonucleoprotein complex	46/366	493/9955	4.09522e-09	1.12107e-07	9.75308e-08	Seita.1G203200/Seita.1G214900/Seita.2G055300/Seita.2G079700/Seita.2G143900/Seita.2G267400/Seita.2G381700/Seita.2G389700/Seita.3G143200/Seita.3G162800/Seita.3G197300/Seita.4G122000/Seita.5G003200/Seita.6G112100/Seita.6G231500/Seita.7G134600/Seita.8G046000/Seita.8G161700/Seita.9G040900/Seita.9G044700/Seita.9G414500/Seita.9G436100/Seita.9G544700/Seita.2G048400/Seita.2G362700/Seita.2G404800/Seita.3G2…	46
Stem.Cluster_A	CC	GO:0015934	large ribosomal subunit	18/366	93/9955	5.80418e-09	1.41235e-07	1.22872e-07	Seita.1G214900/Seita.2G055300/Seita.2G143900/Seita.2G267400/Seita.3G162800/Seita.3G197300/Seita.6G112100/Seita.6G231500/Seita.7G134600/Seita.8G046000/Seita.9G544700/Seita.4G177300/Seita.6G017200/Seita.6G085600/Seita.6G224900/Seita.7G064700/Seita.7G166100/Seita.7G228400	18
Stem.Cluster_A	CC	GO:0022627	cytosolic small ribosomal subunit	12/366	47/9955	8.32185e-08	1.82248e-06	1.58553e-06	Seita.2G079700/Seita.2G389700/Seita.9G044700/Seita.2G048400/Seita.2G362700/Seita.3G280800/Seita.4G023300/Seita.7G099000/Seita.7G234800/Seita.9G131800/Seita.9G502500/Seita.9G517100	12
Stem.Cluster_A	CC	GO:0015935	small ribosomal subunit	12/366	70/9955	7.89399e-06	0.000157162	0.000136728	Seita.2G079700/Seita.2G389700/Seita.9G044700/Seita.2G048400/Seita.2G362700/Seita.3G280800/Seita.4G023300/Seita.7G099000/Seita.7G234800/Seita.9G131800/Seita.9G502500/Seita.9G517100	12
Stem.Cluster_A	CC	GO:0005732	small nucleolar ribonucleoprotein complex	6/366	22/9955	0.000107223	0.00195683	0.00170241	Seita.4G122000/Seita.8G161700/Seita.2G404800/Seita.9G057400/Seita.9G404600/Seita.9G404700	6
Stem.Cluster_A	CC	GO:0030684	preribosome	9/366	55/9955	0.000158098	0.0025062	0.00218035	Seita.2G389700/Seita.3G143200/Seita.5G003200/Seita.9G414500/Seita.3G280800/Seita.9G128300/Seita.9G404600/Seita.9G404700/Seita.9G517100	9
Stem.Cluster_A	CC	GO:0005759	mitochondrial matrix	12/366	94/9955	0.000160214	0.0025062	0.00218035	Seita.1G266700/Seita.2G143900/Seita.2G445000/Seita.3G047800/Seita.4G024000/Seita.4G108300/Seita.5G021800/Seita.7G280800/Seita.9G192300/Seita.1G069500/Seita.3G169400/Seita.5G367800	12
Stem.Cluster_A	CC	GO:0005740	mitochondrial envelope	20/366	224/9955	0.000218479	0.00318979	0.00277507	Seita.1G210300/Seita.2G257000/Seita.5G011600/Seita.5G011800/Seita.5G012100/Seita.5G015400/Seita.5G026800/Seita.6G208200/Seita.7G141600/Seita.9G190000/Seita.9G192300/Seita.9G386200/Seita.9G416100/Seita.9G431100/Seita.2G309200/Seita.5G123100/Seita.7G228300/Seita.2G078000/Seita.5G367800/Seita.7G126300	20
Stem.Cluster_A	CC	GO:0098798	mitochondrial protein complex	13/366	119/9955	0.000415904	0.00569269	0.00495254	Seita.1G210300/Seita.2G143900/Seita.2G445000/Seita.5G021800/Seita.5G026800/Seita.7G280800/Seita.9G190000/Seita.9G192300/Seita.9G386200/Seita.9G431100/Seita.7G228300/Seita.2G078000/Seita.7G126300	13
Stem.Cluster_A	CC	GO:0031304	intrinsic component of mitochondrial inner membrane	5/366	20/9955	0.000641722	0.00826688	0.00719205	Seita.5G026800/Seita.9G190000/Seita.9G192300/Seita.9G431100/Seita.5G367800	5
Stem.Cluster_A	CC	GO:0031966	mitochondrial membrane	18/366	209/9955	0.000687872	0.0083691	0.00728098	Seita.1G210300/Seita.2G257000/Seita.5G011600/Seita.5G011800/Seita.5G012100/Seita.5G015400/Seita.5G026800/Seita.6G208200/Seita.7G141600/Seita.9G190000/Seita.9G192300/Seita.9G386200/Seita.9G431100/Seita.2G309200/Seita.7G228300/Seita.2G078000/Seita.5G367800/Seita.7G126300	18
Stem.Cluster_A	CC	GO:0030686	90S preribosome	5/366	26/9955	0.00227098	0.026176	0.0227727	Seita.2G389700/Seita.9G414500/Seita.3G280800/Seita.9G128300/Seita.9G517100	5
Stem.Cluster_A	CC	GO:0031300	intrinsic component of organelle membrane	8/366	69/9955	0.00364756	0.0399408	0.0347478	Seita.3G144000/Seita.5G026800/Seita.9G190000/Seita.9G192300/Seita.9G431100/Seita.9G542400/Seita.9G179300/Seita.5G367800	8
Stem.Cluster_A	CC	GO:0031305	integral component of mitochondrial inner membrane	4/366	19/9955	0.00449269	0.0468523	0.0407608	Seita.5G026800/Seita.9G190000/Seita.9G192300/Seita.9G431100	4
Stem.Cluster_A	MF	GO:0003735	structural constituent of ribosome	30/317	182/8539	3.73673e-12	1.29258e-09	1.25713e-09	Seita.1G214900/Seita.2G055300/Seita.2G079700/Seita.2G143900/Seita.2G267400/Seita.2G389700/Seita.3G162800/Seita.3G197300/Seita.6G112100/Seita.6G231500/Seita.7G134600/Seita.8G046000/Seita.9G044700/Seita.9G544700/Seita.2G048400/Seita.2G362700/Seita.3G280800/Seita.4G023300/Seita.4G177300/Seita.6G017200/Seita.6G085600/Seita.6G224900/Seita.7G064700/Seita.7G099000/Seita.7G166100/Seita.7G228400/Seita.7G2…	30
Stem.Cluster_A	MF	GO:0005198	structural molecule activity	35/317	250/8539	7.28217e-12	1.29258e-09	1.25713e-09	Seita.1G214900/Seita.2G055300/Seita.2G079700/Seita.2G143900/Seita.2G267400/Seita.2G389700/Seita.3G162800/Seita.3G197300/Seita.5G025500/Seita.5G026400/Seita.5G028100/Seita.6G112100/Seita.6G231500/Seita.7G134600/Seita.7G147600/Seita.8G046000/Seita.9G044700/Seita.9G544700/Seita.1G267900/Seita.2G048400/Seita.2G362700/Seita.3G280800/Seita.4G023300/Seita.4G177300/Seita.6G017200/Seita.6G085600/Seita.6G2…	35
Stem.Cluster_A	MF	GO:0003729	mRNA binding	28/317	276/8539	1.15524e-06	0.000136704	0.000132954	Seita.1G203200/Seita.1G214900/Seita.2G055300/Seita.2G079700/Seita.2G182500/Seita.2G381700/Seita.2G389700/Seita.3G066900/Seita.3G197300/Seita.6G053600/Seita.7G134600/Seita.8G046000/Seita.9G044700/Seita.9G380500/Seita.2G048400/Seita.3G280800/Seita.3G357800/Seita.6G017200/Seita.7G037000/Seita.7G064700/Seita.7G099000/Seita.7G166100/Seita.7G228400/Seita.9G183600/Seita.9G502500/Seita.9G517100/Seita.2G3…	28
Stem.Cluster_A	MF	GO:0030515	snoRNA binding	6/317	22/8539	0.000112531	0.00998712	0.0097132	Seita.4G122000/Seita.8G161700/Seita.9G414500/Seita.9G057400/Seita.9G404600/Seita.9G404700	6
Stem.Cluster_A	MF	GO:0016151	nickel cation binding	4/317	10/8539	0.000327735	0.0232692	0.0226309	Seita.5G166200/Seita.5G166300/Seita.8G115200/Seita.8G115400	4
Stem.Cluster_B	BP	GO:0071365	cellular response to auxin stimulus	18/238	159/9983	3.97833e-08	2.22999e-05	2.1146e-05	Seita.1G333100/Seita.2G115900/Seita.2G166300/Seita.2G166600/Seita.4G005300/Seita.4G006500/Seita.5G351400/Seita.1G317400/Seita.3G244500/Seita.4G083300/Seita.4G101300/Seita.5G351800/Seita.6G251100/Seita.7G224300/Seita.9G277500/Seita.2G115800/Seita.3G068600/Seita.9G314000	18
Stem.Cluster_B	BP	GO:0009734	auxin-activated signaling pathway	17/238	142/9983	4.1721e-08	2.22999e-05	2.1146e-05	Seita.1G333100/Seita.2G115900/Seita.2G166300/Seita.2G166600/Seita.4G005300/Seita.4G006500/Seita.5G351400/Seita.1G317400/Seita.3G244500/Seita.4G083300/Seita.4G101300/Seita.5G351800/Seita.6G251100/Seita.7G224300/Seita.9G277500/Seita.2G115800/Seita.3G068600	17
Stem.Cluster_B	BP	GO:0009733	response to auxin	24/238	326/9983	8.64885e-07	0.000244222	0.000231585	Seita.1G333100/Seita.2G115900/Seita.2G166300/Seita.2G166600/Seita.3G080900/Seita.4G005300/Seita.4G006500/Seita.5G315800/Seita.5G351400/Seita.7G124900/Seita.1G317400/Seita.3G244500/Seita.4G083300/Seita.4G101300/Seita.5G351800/Seita.6G251100/Seita.7G189300/Seita.7G224300/Seita.9G277500/Seita.2G115800/Seita.3G068600/Seita.5G134600/Seita.9G314000/Seita.8G101900	24
Stem.Cluster_B	BP	GO:0048878	chemical homeostasis	24/238	327/9983	9.13834e-07	0.000244222	0.000231585	Seita.1G042800/Seita.1G333100/Seita.2G397300/Seita.4G175000/Seita.5G123900/Seita.5G351400/Seita.6G089500/Seita.7G075500/Seita.9G240300/Seita.1G278500/Seita.1G317400/Seita.2G426200/Seita.3G006100/Seita.3G049900/Seita.3G260800/Seita.4G083300/Seita.4G101300/Seita.4G110300/Seita.4G242300/Seita.5G000800/Seita.7G182800/Seita.9G277500/Seita.3G097600/Seita.9G344700	24
Stem.Cluster_B	BP	GO:0015698	inorganic anion transport	12/238	96/9983	2.71648e-06	0.000564762	0.000535538	Seita.1G360400/Seita.5G073800/Seita.5G326900/Seita.5G461300/Seita.9G506300/Seita.1G278500/Seita.2G302400/Seita.5G000800/Seita.5G286900/Seita.9G235900/Seita.9G506200/Seita.3G402300	12
Stem.Cluster_B	BP	GO:0050801	ion homeostasis	18/238	213/9983	3.16985e-06	0.000564762	0.000535538	Seita.1G333100/Seita.2G397300/Seita.4G175000/Seita.7G075500/Seita.9G240300/Seita.1G278500/Seita.2G426200/Seita.3G006100/Seita.3G049900/Seita.3G260800/Seita.4G083300/Seita.4G110300/Seita.4G242300/Seita.5G000800/Seita.7G182800/Seita.9G277500/Seita.3G097600/Seita.9G344700	18
Stem.Cluster_B	BP	GO:0055065	metal ion homeostasis	14/238	140/9983	5.91363e-06	0.000903096	0.000856365	Seita.2G397300/Seita.4G175000/Seita.7G075500/Seita.9G240300/Seita.1G278500/Seita.2G426200/Seita.3G006100/Seita.3G049900/Seita.3G260800/Seita.4G110300/Seita.4G242300/Seita.7G182800/Seita.3G097600/Seita.9G344700	14
Stem.Cluster_B	BP	GO:0046916	cellular transition metal ion homeostasis	9/238	58/9983	8.22879e-06	0.000980102	0.000929386	Seita.2G397300/Seita.4G175000/Seita.7G075500/Seita.9G240300/Seita.2G426200/Seita.3G006100/Seita.3G049900/Seita.7G182800/Seita.9G344700	9
Stem.Cluster_B	BP	GO:0001763	morphogenesis of a branching structure	7/238	33/9983	1.00852e-05	0.000980102	0.000929386	Seita.3G223500/Seita.5G315800/Seita.7G078600/Seita.2G396100/Seita.5G285100/Seita.7G189300/Seita.8G101900	7
Stem.Cluster_B	BP	GO:0010223	secondary shoot formation	7/238	33/9983	1.00852e-05	0.000980102	0.000929386	Seita.3G223500/Seita.5G315800/Seita.7G078600/Seita.2G396100/Seita.5G285100/Seita.7G189300/Seita.8G101900	7
Stem.Cluster_B	BP	GO:0010346	shoot axis formation	7/238	33/9983	1.00852e-05	0.000980102	0.000929386	Seita.3G223500/Seita.5G315800/Seita.7G078600/Seita.2G396100/Seita.5G285100/Seita.7G189300/Seita.8G101900	7
Stem.Cluster_B	BP	GO:0042592	homeostatic process	25/238	417/9983	1.97054e-05	0.00171944	0.00163046	Seita.1G042800/Seita.1G333100/Seita.2G397300/Seita.4G175000/Seita.5G123900/Seita.5G351400/Seita.6G089500/Seita.7G075500/Seita.9G240300/Seita.1G278500/Seita.1G317400/Seita.2G426200/Seita.3G006100/Seita.3G049900/Seita.3G260800/Seita.4G083300/Seita.4G101300/Seita.4G110300/Seita.4G242300/Seita.5G000800/Seita.7G182800/Seita.9G277500/Seita.3G089400/Seita.3G097600/Seita.9G344700	25
Stem.Cluster_B	BP	GO:0055076	transition metal ion homeostasis	10/238	81/9983	2.09099e-05	0.00171944	0.00163046	Seita.2G397300/Seita.4G175000/Seita.7G075500/Seita.9G240300/Seita.2G426200/Seita.3G006100/Seita.3G049900/Seita.4G242300/Seita.7G182800/Seita.9G344700	10
Stem.Cluster_B	BP	GO:0055080	cation homeostasis	14/238	164/9983	3.61081e-05	0.00275712	0.00261445	Seita.2G397300/Seita.4G175000/Seita.7G075500/Seita.9G240300/Seita.1G278500/Seita.2G426200/Seita.3G006100/Seita.3G049900/Seita.3G260800/Seita.4G110300/Seita.4G242300/Seita.7G182800/Seita.3G097600/Seita.9G344700	14
Stem.Cluster_B	BP	GO:0030001	metal ion transport	17/238	243/9983	6.92942e-05	0.00493837	0.00468283	Seita.2G397300/Seita.4G175000/Seita.7G075500/Seita.7G194000/Seita.7G234300/Seita.9G240300/Seita.1G278500/Seita.2G426200/Seita.3G006100/Seita.3G049900/Seita.4G110300/Seita.4G242300/Seita.5G024400/Seita.7G182800/Seita.7G273400/Seita.9G003100/Seita.9G344700	17
Stem.Cluster_B	BP	GO:0006875	cellular metal ion homeostasis	10/238	96/9983	9.18851e-05	0.00591679	0.00561063	Seita.2G397300/Seita.4G175000/Seita.7G075500/Seita.9G240300/Seita.2G426200/Seita.3G006100/Seita.3G049900/Seita.3G260800/Seita.7G182800/Seita.9G344700	10
Stem.Cluster_B	BP	GO:0098771	inorganic ion homeostasis	14/238	179/9983	9.40931e-05	0.00591679	0.00561063	Seita.2G397300/Seita.4G175000/Seita.7G075500/Seita.9G240300/Seita.1G278500/Seita.2G426200/Seita.3G006100/Seita.3G049900/Seita.3G260800/Seita.4G110300/Seita.4G242300/Seita.7G182800/Seita.3G097600/Seita.9G344700	14
Stem.Cluster_B	BP	GO:0006812	cation transport	23/238	415/9983	0.000141984	0.00801892	0.00760398	Seita.1G055500/Seita.2G397300/Seita.4G005300/Seita.4G006500/Seita.4G175000/Seita.7G075500/Seita.7G194000/Seita.7G234300/Seita.9G240300/Seita.1G191000/Seita.1G278500/Seita.2G426200/Seita.3G006100/Seita.3G049900/Seita.3G260800/Seita.4G110300/Seita.4G242300/Seita.5G024400/Seita.7G182800/Seita.7G273400/Seita.9G003100/Seita.9G235900/Seita.9G344700	23
Stem.Cluster_B	BP	GO:0006873	cellular ion homeostasis	11/238	121/9983	0.000142525	0.00801892	0.00760398	Seita.2G397300/Seita.4G175000/Seita.7G075500/Seita.9G240300/Seita.2G426200/Seita.3G006100/Seita.3G049900/Seita.3G260800/Seita.5G000800/Seita.7G182800/Seita.9G344700	11
Stem.Cluster_B	BP	GO:0030003	cellular cation homeostasis	10/238	108/9983	0.000245821	0.0131392	0.0124593	Seita.2G397300/Seita.4G175000/Seita.7G075500/Seita.9G240300/Seita.2G426200/Seita.3G006100/Seita.3G049900/Seita.3G260800/Seita.7G182800/Seita.9G344700	10
Stem.Cluster_B	BP	GO:0051238	sequestering of metal ion	4/238	14/9983	0.000261205	0.0132966	0.0126085	Seita.3G006100/Seita.3G049900/Seita.7G182800/Seita.9G003100	4
Stem.Cluster_B	BP	GO:0010016	shoot system morphogenesis	13/238	176/9983	0.000294424	0.0143063	0.013566	Seita.3G223500/Seita.5G315800/Seita.7G078600/Seita.1G317400/Seita.2G396100/Seita.4G101300/Seita.5G285100/Seita.7G189300/Seita.9G356100/Seita.5G451100/Seita.6G049400/Seita.7G298100/Seita.8G101900	13
Stem.Cluster_B	BP	GO:0006820	anion transport	19/238	328/9983	0.000314726	0.0146279	0.013871	Seita.1G333100/Seita.1G360400/Seita.3G223500/Seita.4G005300/Seita.4G006500/Seita.5G073800/Seita.5G326900/Seita.5G461300/Seita.7G298300/Seita.9G506300/Seita.1G278500/Seita.2G302400/Seita.4G083300/Seita.5G000800/Seita.5G286900/Seita.9G235900/Seita.9G277500/Seita.9G506200/Seita.3G402300	19
Stem.Cluster_B	BP	GO:1905393	plant organ formation	11/238	135/9983	0.000373004	0.0166142	0.0157545	Seita.3G223500/Seita.5G315800/Seita.7G078600/Seita.1G317400/Seita.2G396100/Seita.4G101300/Seita.5G285100/Seita.7G189300/Seita.3G402300/Seita.5G451100/Seita.8G101900	11
Stem.Cluster_B	BP	GO:0051090	regulation of DNA-binding transcription factor activity	5/238	28/9983	0.000463353	0.019813	0.0187877	Seita.3G195500/Seita.5G316700/Seita.7G124900/Seita.3G176500/Seita.5G142700	5
Stem.Cluster_B	BP	GO:0015807	L-amino acid transport	5/238	29/9983	0.000549117	0.021741	0.020616	Seita.1G333100/Seita.4G005300/Seita.4G006500/Seita.4G083300/Seita.9G277500	5
Stem.Cluster_B	BP	GO:1902475	L-alpha-amino acid transmembrane transport	5/238	29/9983	0.000549117	0.021741	0.020616	Seita.1G333100/Seita.4G005300/Seita.4G006500/Seita.4G083300/Seita.9G277500	5
Stem.Cluster_B	BP	GO:0055082	cellular chemical homeostasis	11/238	144/9983	0.000646005	0.0246635	0.0233873	Seita.2G397300/Seita.4G175000/Seita.7G075500/Seita.9G240300/Seita.2G426200/Seita.3G006100/Seita.3G049900/Seita.3G260800/Seita.5G000800/Seita.7G182800/Seita.9G344700	11
Stem.Cluster_B	BP	GO:0005992	trehalose biosynthetic process	4/238	18/9983	0.000740714	0.0270018	0.0256046	Seita.1G323700/Seita.2G396200/Seita.2G396100/Seita.3G176900	4
Stem.Cluster_B	BP	GO:0003333	amino acid transmembrane transport	7/238	64/9983	0.000783027	0.0270018	0.0256046	Seita.1G333100/Seita.3G223500/Seita.4G005300/Seita.4G006500/Seita.7G298300/Seita.4G083300/Seita.9G277500	7
Stem.Cluster_B	BP	GO:0006865	amino acid transport	7/238	64/9983	0.000783027	0.0270018	0.0256046	Seita.1G333100/Seita.3G223500/Seita.4G005300/Seita.4G006500/Seita.7G298300/Seita.4G083300/Seita.9G277500	7
Stem.Cluster_B	BP	GO:0000041	transition metal ion transport	7/238	65/9983	0.000860033	0.0285029	0.027028	Seita.7G234300/Seita.3G006100/Seita.3G049900/Seita.4G242300/Seita.7G182800/Seita.7G273400/Seita.9G003100	7
Stem.Cluster_B	BP	GO:0010200	response to chitin	9/238	105/9983	0.000879883	0.0285029	0.027028	Seita.2G206000/Seita.3G287100/Seita.1G188700/Seita.2G302400/Seita.3G331100/Seita.5G208300/Seita.5G233100/Seita.8G244100/Seita.5G389300	9
Stem.Cluster_B	BP	GO:0005991	trehalose metabolic process	4/238	20/9983	0.00112967	0.0355181	0.0336802	Seita.1G323700/Seita.2G396200/Seita.2G396100/Seita.3G176900	4
Stem.Cluster_B	BP	GO:0019725	cellular homeostasis	12/238	182/9983	0.0013636	0.0388773	0.0368655	Seita.2G397300/Seita.4G175000/Seita.7G075500/Seita.9G240300/Seita.2G426200/Seita.3G006100/Seita.3G049900/Seita.3G260800/Seita.5G000800/Seita.7G182800/Seita.3G089400/Seita.9G344700	12
Stem.Cluster_B	BP	GO:0006968	cellular defense response	3/238	10/9983	0.00141835	0.0388773	0.0368655	Seita.5G316700/Seita.3G176500/Seita.5G142700	3
Stem.Cluster_B	BP	GO:0060688	regulation of morphogenesis of a branching structure	3/238	10/9983	0.00141835	0.0388773	0.0368655	Seita.3G223500/Seita.7G078600/Seita.2G396100	3
Stem.Cluster_B	BP	GO:0080144	amino acid homeostasis	3/238	10/9983	0.00141835	0.0388773	0.0368655	Seita.1G333100/Seita.4G083300/Seita.9G277500	3
Stem.Cluster_B	BP	GO:2000032	regulation of secondary shoot formation	3/238	10/9983	0.00141835	0.0388773	0.0368655	Seita.3G223500/Seita.7G078600/Seita.2G396100	3
Stem.Cluster_B	BP	GO:0098656	anion transmembrane transport	15/238	265/9983	0.00168924	0.045145	0.0428089	Seita.1G333100/Seita.1G360400/Seita.3G223500/Seita.4G005300/Seita.4G006500/Seita.5G326900/Seita.5G461300/Seita.7G298300/Seita.9G506300/Seita.1G278500/Seita.4G083300/Seita.5G000800/Seita.9G235900/Seita.9G277500/Seita.9G506200	15
Stem.Cluster_B	CC	GO:0005887	integral component of plasma membrane	25/203	211/9955	8.71387e-13	6.70968e-11	6.51247e-11	Seita.1G333100/Seita.2G115900/Seita.2G166300/Seita.2G166600/Seita.4G005300/Seita.4G006500/Seita.4G051900/Seita.4G098700/Seita.7G194000/Seita.9G506300/Seita.1G135500/Seita.3G244500/Seita.4G083300/Seita.4G110300/Seita.5G351800/Seita.6G251100/Seita.9G235900/Seita.9G277500/Seita.9G506200/Seita.2G115800/Seita.2G291500/Seita.3G068600/Seita.3G319400/Seita.5G007500/Seita.8G130300	25
Stem.Cluster_B	CC	GO:0031226	intrinsic component of plasma membrane	25/203	331/9955	1.40285e-08	5.40097e-07	5.24223e-07	Seita.1G333100/Seita.2G115900/Seita.2G166300/Seita.2G166600/Seita.4G005300/Seita.4G006500/Seita.4G051900/Seita.4G098700/Seita.7G194000/Seita.9G506300/Seita.1G135500/Seita.3G244500/Seita.4G083300/Seita.4G110300/Seita.5G351800/Seita.6G251100/Seita.9G235900/Seita.9G277500/Seita.9G506200/Seita.2G115800/Seita.2G291500/Seita.3G068600/Seita.3G319400/Seita.5G007500/Seita.8G130300	25
Stem.Cluster_B	CC	GO:0005938	cell cortex	14/203	122/9955	1.69498e-07	4.35044e-06	4.22257e-06	Seita.1G292500/Seita.1G333100/Seita.2G115900/Seita.2G166300/Seita.2G166600/Seita.4G005300/Seita.4G006500/Seita.3G244500/Seita.4G083300/Seita.5G351800/Seita.6G251100/Seita.9G277500/Seita.2G115800/Seita.3G068600	14
Stem.Cluster_B	CC	GO:0099568	cytoplasmic region	14/203	131/9955	4.12959e-07	7.94947e-06	7.71582e-06	Seita.1G292500/Seita.1G333100/Seita.2G115900/Seita.2G166300/Seita.2G166600/Seita.4G005300/Seita.4G006500/Seita.3G244500/Seita.4G083300/Seita.5G351800/Seita.6G251100/Seita.9G277500/Seita.2G115800/Seita.3G068600	14
Stem.Cluster_B	MF	GO:0015562	efflux transmembrane transporter activity	6/198	30/8539	5.37639e-05	0.0151213	0.0137799	Seita.1G333100/Seita.5G351400/Seita.1G317400/Seita.4G083300/Seita.4G101300/Seita.9G277500	6
Stem.Cluster_B	MF	GO:0015318	inorganic molecular entity transmembrane transporter activity	25/198	478/8539	0.000106864	0.0151213	0.0137799	Seita.1G333100/Seita.1G360400/Seita.3G223500/Seita.4G005300/Seita.4G006500/Seita.4G098700/Seita.5G326900/Seita.5G461300/Seita.7G194000/Seita.7G234300/Seita.7G298300/Seita.9G506300/Seita.1G278500/Seita.3G006100/Seita.3G049900/Seita.4G083300/Seita.4G110300/Seita.5G024400/Seita.7G182800/Seita.7G273400/Seita.9G235900/Seita.9G277500/Seita.9G506200/Seita.2G291500/Seita.5G007500	25
Stem.Cluster_B	MF	GO:0015179	L-amino acid transmembrane transporter activity	5/198	29/8539	0.000480965	0.034656	0.0315816	Seita.1G333100/Seita.4G005300/Seita.4G006500/Seita.4G083300/Seita.9G277500	5
Stem.Cluster_B	MF	GO:0015171	amino acid transmembrane transporter activity	7/198	61/8539	0.000489837	0.034656	0.0315816	Seita.1G333100/Seita.3G223500/Seita.4G005300/Seita.4G006500/Seita.7G298300/Seita.4G083300/Seita.9G277500	7
Stem.Cluster_C	BP	GO:0009834	plant-type secondary cell wall biogenesis	32/1377	73/9983	3.47418e-10	7.66056e-07	7.35428e-07	Seita.1G080900/Seita.2G209100/Seita.3G046000/Seita.3G132100/Seita.3G136800/Seita.3G158400/Seita.3G158500/Seita.3G217800/Seita.5G242700/Seita.5G319100/Seita.5G363400/Seita.5G437300/Seita.7G220500/Seita.7G264400/Seita.7G272500/Seita.8G252500/Seita.9G425900/Seita.9G560500/Seita.1G281500/Seita.4G255400/Seita.9G113200/Seita.7G264000/Seita.3G235400/Seita.6G251100/Seita.3G402300/Seita.2G200100/Seita.2G2…	32
Stem.Cluster_C	BP	GO:0071554	cell wall organization or biogenesis	92/1377	409/9983	7.42096e-07	0.000773449	0.000742526	Seita.1G080900/Seita.2G209100/Seita.3G046000/Seita.3G132100/Seita.3G136800/Seita.3G158400/Seita.3G158500/Seita.3G217800/Seita.4G181500/Seita.5G242700/Seita.5G319100/Seita.5G363400/Seita.5G437300/Seita.7G220500/Seita.7G264400/Seita.7G272500/Seita.8G081100/Seita.8G252500/Seita.9G260200/Seita.9G326900/Seita.9G363400/Seita.9G425900/Seita.9G434100/Seita.9G440600/Seita.9G494200/Seita.9G560500/Seita.1G2…	92
Stem.Cluster_C	BP	GO:0071669	plant-type cell wall organization or biogenesis	64/1377	257/9983	1.05231e-06	0.000773449	0.000742526	Seita.1G080900/Seita.2G209100/Seita.3G046000/Seita.3G132100/Seita.3G136800/Seita.3G158400/Seita.3G158500/Seita.3G217800/Seita.5G242700/Seita.5G319100/Seita.5G363400/Seita.5G437300/Seita.7G220500/Seita.7G264400/Seita.7G272500/Seita.8G252500/Seita.9G326900/Seita.9G425900/Seita.9G434100/Seita.9G494200/Seita.9G560500/Seita.1G281500/Seita.3G332200/Seita.4G255400/Seita.9G113200/Seita.7G264000/Seita.3G2…	64
Stem.Cluster_C	BP	GO:0042546	cell wall biogenesis	46/1377	169/9983	2.72993e-06	0.00150488	0.00144471	Seita.1G080900/Seita.2G209100/Seita.3G046000/Seita.3G132100/Seita.3G136800/Seita.3G158400/Seita.3G158500/Seita.3G217800/Seita.5G242700/Seita.5G319100/Seita.5G363400/Seita.5G437300/Seita.7G220500/Seita.7G264400/Seita.7G272500/Seita.8G252500/Seita.9G425900/Seita.9G434100/Seita.9G440600/Seita.9G494200/Seita.9G560500/Seita.1G281500/Seita.3G332200/Seita.4G255400/Seita.9G113200/Seita.7G264000/Seita.3G2…	46
Stem.Cluster_C	BP	GO:0045492	xylan biosynthetic process	15/1377	31/9983	3.94328e-06	0.00173898	0.00166946	Seita.1G080900/Seita.3G046000/Seita.3G132100/Seita.3G158400/Seita.3G158500/Seita.3G217800/Seita.5G437300/Seita.7G264400/Seita.9G425900/Seita.9G440600/Seita.4G255400/Seita.7G264000/Seita.3G235400/Seita.9G037100/Seita.9G441000	15
Stem.Cluster_C	BP	GO:2000652	regulation of secondary cell wall biogenesis	13/1377	26/9983	1.11668e-05	0.00381551	0.00366296	Seita.3G136800/Seita.5G242700/Seita.5G363400/Seita.7G220500/Seita.9G560500/Seita.1G281500/Seita.9G113200/Seita.3G402300/Seita.2G200100/Seita.2G200200/Seita.3G350800/Seita.1G251900/Seita.7G181500	13
Stem.Cluster_C	BP	GO:0009832	plant-type cell wall biogenesis	40/1377	147/9983	1.21127e-05	0.00381551	0.00366296	Seita.1G080900/Seita.2G209100/Seita.3G046000/Seita.3G132100/Seita.3G136800/Seita.3G158400/Seita.3G158500/Seita.3G217800/Seita.5G242700/Seita.5G319100/Seita.5G363400/Seita.5G437300/Seita.7G220500/Seita.7G264400/Seita.7G272500/Seita.8G252500/Seita.9G425900/Seita.9G434100/Seita.9G494200/Seita.9G560500/Seita.1G281500/Seita.3G332200/Seita.4G255400/Seita.9G113200/Seita.7G264000/Seita.3G235400/Seita.3G1…	40
Stem.Cluster_C	BP	GO:0045491	xylan metabolic process	19/1377	51/9983	2.37748e-05	0.00655294	0.00629095	Seita.1G080900/Seita.3G046000/Seita.3G132100/Seita.3G158400/Seita.3G158500/Seita.3G217800/Seita.5G437300/Seita.7G264400/Seita.8G081100/Seita.9G425900/Seita.9G440600/Seita.4G255400/Seita.7G264000/Seita.3G235400/Seita.2G439200/Seita.7G257800/Seita.9G037100/Seita.9G441000/Seita.8G081300	19
Stem.Cluster_C	BP	GO:1902074	response to salt	11/1377	21/9983	3.08175e-05	0.00665584	0.00638973	Seita.9G113200/Seita.5G461300/Seita.7G124900/Seita.7G290600/Seita.9G198800/Seita.5G394300/Seita.1G209000/Seita.9G210000/Seita.3G283100/Seita.3G283600/Seita.3G283500	11
Stem.Cluster_C	BP	GO:0050801	ion homeostasis	51/1377	213/9983	4.04102e-05	0.00665584	0.00638973	Seita.1G141800/Seita.3G193100/Seita.6G001600/Seita.7G220500/Seita.8G025400/Seita.9G558000/Seita.1G281500/Seita.3G030500/Seita.9G475100/Seita.3G333100/Seita.1G333100/Seita.2G397300/Seita.4G175000/Seita.7G075500/Seita.9G240300/Seita.1G278500/Seita.2G426200/Seita.3G006100/Seita.3G049900/Seita.3G260800/Seita.4G083300/Seita.4G110300/Seita.4G242300/Seita.5G000800/Seita.7G182800/Seita.9G277500/Seita.3G0…	51
Stem.Cluster_C	BP	GO:0009636	response to toxic substance	58/1377	252/9983	4.20288e-05	0.00665584	0.00638973	Seita.1G358900/Seita.6G053800/Seita.6G055900/Seita.4G232000/Seita.9G475100/Seita.5G421200/Seita.1G336800/Seita.3G097000/Seita.3G192500/Seita.6G203000/Seita.7G124900/Seita.7G194000/Seita.3G270300/Seita.4G242300/Seita.3G089400/Seita.7G093900/Seita.1G012200/Seita.1G045200/Seita.1G192100/Seita.3G175700/Seita.5G015400/Seita.5G092400/Seita.5G342100/Seita.5G346500/Seita.5G463200/Seita.7G102200/Seita.9G3…	58
Stem.Cluster_C	BP	GO:0009699	phenylpropanoid biosynthetic process	29/1377	99/9983	4.3388e-05	0.00665584	0.00638973	Seita.1G230100/Seita.3G194300/Seita.3G394400/Seita.4G181500/Seita.4G191500/Seita.6G055900/Seita.6G244100/Seita.7G155700/Seita.7G220500/Seita.8G252500/Seita.1G065800/Seita.1G281500/Seita.4G021600/Seita.4G048300/Seita.8G126500/Seita.6G163400/Seita.3G402300/Seita.9G545600/Seita.5G053200/Seita.8G153700/Seita.3G142500/Seita.3G218600/Seita.5G053000/Seita.5G386300/Seita.6G093400/Seita.8G128800/Seita.9G2…	29
Stem.Cluster_C	BP	GO:0048878	chemical homeostasis	71/1377	327/9983	4.74517e-05	0.00665584	0.00638973	Seita.1G141800/Seita.1G230100/Seita.3G193100/Seita.5G139200/Seita.5G429600/Seita.6G001600/Seita.7G096800/Seita.7G155700/Seita.7G220500/Seita.8G025400/Seita.9G558000/Seita.1G281500/Seita.3G030500/Seita.9G475100/Seita.3G333100/Seita.1G042800/Seita.1G333100/Seita.2G397300/Seita.4G175000/Seita.5G123900/Seita.5G351400/Seita.6G089500/Seita.7G075500/Seita.9G240300/Seita.1G278500/Seita.1G317400/Seita.2G4…	71
Stem.Cluster_C	BP	GO:0044038	cell wall macromolecule biosynthetic process	18/1377	49/9983	4.82964e-05	0.00665584	0.00638973	Seita.1G080900/Seita.3G046000/Seita.3G132100/Seita.3G158400/Seita.3G158500/Seita.3G217800/Seita.5G437300/Seita.7G264400/Seita.9G425900/Seita.9G440600/Seita.9G494200/Seita.4G255400/Seita.7G264000/Seita.3G235400/Seita.8G128800/Seita.9G037100/Seita.9G441000/Seita.1G325200	18
Stem.Cluster_C	BP	GO:0070589	cellular component macromolecule biosynthetic process	18/1377	49/9983	4.82964e-05	0.00665584	0.00638973	Seita.1G080900/Seita.3G046000/Seita.3G132100/Seita.3G158400/Seita.3G158500/Seita.3G217800/Seita.5G437300/Seita.7G264400/Seita.9G425900/Seita.9G440600/Seita.9G494200/Seita.4G255400/Seita.7G264000/Seita.3G235400/Seita.8G128800/Seita.9G037100/Seita.9G441000/Seita.1G325200	18
Stem.Cluster_C	BP	GO:0070592	cell wall polysaccharide biosynthetic process	18/1377	49/9983	4.82964e-05	0.00665584	0.00638973	Seita.1G080900/Seita.3G046000/Seita.3G132100/Seita.3G158400/Seita.3G158500/Seita.3G217800/Seita.5G437300/Seita.7G264400/Seita.9G425900/Seita.9G440600/Seita.9G494200/Seita.4G255400/Seita.7G264000/Seita.3G235400/Seita.8G128800/Seita.9G037100/Seita.9G441000/Seita.1G325200	18
Stem.Cluster_C	BP	GO:1903338	regulation of cell wall organization or biogenesis	14/1377	34/9983	7.87119e-05	0.00935957	0.00898537	Seita.3G136800/Seita.5G242700/Seita.5G363400/Seita.7G220500/Seita.9G560500/Seita.1G281500/Seita.9G113200/Seita.3G402300/Seita.2G200100/Seita.2G200200/Seita.5G383300/Seita.3G350800/Seita.1G251900/Seita.7G181500	14
Stem.Cluster_C	BP	GO:0003333	amino acid transmembrane transport	21/1377	64/9983	8.06494e-05	0.00935957	0.00898537	Seita.4G006600/Seita.5G387200/Seita.9G299000/Seita.9G311800/Seita.1G333100/Seita.3G223500/Seita.4G005300/Seita.4G006500/Seita.7G298300/Seita.4G083300/Seita.9G277500/Seita.1G268000/Seita.2G090200/Seita.5G026800/Seita.5G365100/Seita.7G037100/Seita.7G125900/Seita.8G047400/Seita.9G431100/Seita.1G001100/Seita.9G311700	21
Stem.Cluster_C	BP	GO:0006865	amino acid transport	21/1377	64/9983	8.06494e-05	0.00935957	0.00898537	Seita.4G006600/Seita.5G387200/Seita.9G299000/Seita.9G311800/Seita.1G333100/Seita.3G223500/Seita.4G005300/Seita.4G006500/Seita.7G298300/Seita.4G083300/Seita.9G277500/Seita.1G268000/Seita.2G090200/Seita.5G026800/Seita.5G365100/Seita.7G037100/Seita.7G125900/Seita.8G047400/Seita.9G431100/Seita.1G001100/Seita.9G311700	21
Stem.Cluster_C	BP	GO:0019748	secondary metabolic process	66/1377	305/9983	9.66963e-05	0.0106608	0.0102345	Seita.1G230100/Seita.1G379700/Seita.3G097400/Seita.3G194300/Seita.3G394400/Seita.4G181500/Seita.4G191500/Seita.4G239300/Seita.5G035900/Seita.5G090200/Seita.6G055900/Seita.6G244100/Seita.7G096800/Seita.7G155700/Seita.7G220500/Seita.8G252500/Seita.1G065800/Seita.1G281500/Seita.4G021600/Seita.4G048300/Seita.4G232000/Seita.5G274700/Seita.3G097000/Seita.8G126500/Seita.2G140600/Seita.6G163400/Seita.9G4…	66
Stem.Cluster_C	BP	GO:0005991	trehalose metabolic process	10/1377	20/9983	0.000119209	0.011948	0.0114703	Seita.1G262000/Seita.6G141700/Seita.9G328900/Seita.1G323700/Seita.2G396200/Seita.2G396100/Seita.3G176900/Seita.9G381600/Seita.9G350600/Seita.2G188200	10
Stem.Cluster_C	BP	GO:0009765	photosynthesis, light harvesting	10/1377	20/9983	0.000119209	0.011948	0.0114703	Seita.2G046600/Seita.2G217800/Seita.7G257400/Seita.4G099200/Seita.2G351600/Seita.2G352900/Seita.3G143800/Seita.4G139900/Seita.8G080900/Seita.9G177100	10
Stem.Cluster_C	BP	GO:0009698	phenylpropanoid metabolic process	32/1377	120/9983	0.000132863	0.0122427	0.0117532	Seita.1G230100/Seita.3G194300/Seita.3G394400/Seita.4G181500/Seita.4G191500/Seita.6G055900/Seita.6G244100/Seita.7G155700/Seita.7G220500/Seita.8G252500/Seita.1G065800/Seita.1G281500/Seita.4G021600/Seita.4G048300/Seita.5G274700/Seita.8G126500/Seita.6G163400/Seita.3G402300/Seita.9G545600/Seita.4G096400/Seita.5G053200/Seita.8G153700/Seita.3G142500/Seita.3G218600/Seita.5G053000/Seita.5G386300/Seita.6G0…	32
Stem.Cluster_C	BP	GO:0042542	response to hydrogen peroxide	25/1377	85/9983	0.000133254	0.0122427	0.0117532	Seita.6G055900/Seita.9G475100/Seita.5G421200/Seita.3G192500/Seita.6G203000/Seita.7G124900/Seita.7G093900/Seita.1G012200/Seita.1G045200/Seita.3G175700/Seita.5G092400/Seita.5G342100/Seita.9G319200/Seita.9G488400/Seita.5G207000/Seita.3G192300/Seita.9G470600/Seita.1G209000/Seita.2G319600/Seita.9G108100/Seita.7G101100/Seita.8G222300/Seita.9G424800/Seita.9G475300/Seita.5G328300	25
Stem.Cluster_C	BP	GO:0042592	homeostatic process	84/1377	417/9983	0.000163407	0.0144125	0.0138363	Seita.1G005900/Seita.1G141800/Seita.1G230100/Seita.1G291400/Seita.3G193100/Seita.5G139200/Seita.5G429600/Seita.6G001600/Seita.7G096800/Seita.7G155700/Seita.7G220500/Seita.8G025400/Seita.9G558000/Seita.1G281500/Seita.3G030500/Seita.9G475100/Seita.3G333100/Seita.1G336800/Seita.1G042800/Seita.1G333100/Seita.2G397300/Seita.4G175000/Seita.5G123900/Seita.5G351400/Seita.6G089500/Seita.7G075500/Seita.9G2…	84
Stem.Cluster_C	BP	GO:0009642	response to light intensity	33/1377	127/9983	0.00017958	0.0152298	0.0146209	Seita.6G005700/Seita.7G220500/Seita.1G281500/Seita.7G093900/Seita.1G012200/Seita.1G045200/Seita.2G335600/Seita.3G175700/Seita.5G014300/Seita.5G021800/Seita.5G092400/Seita.7G280800/Seita.9G488400/Seita.5G207000/Seita.9G272800/Seita.9G457400/Seita.2G053800/Seita.2G164500/Seita.3G158600/Seita.7G087700/Seita.9G470600/Seita.2G046600/Seita.9G108100/Seita.7G257400/Seita.9G424800/Seita.4G099200/Seita.1G0…	33
Stem.Cluster_C	BP	GO:0016106	sesquiterpenoid biosynthetic process	15/1377	41/9983	0.000215074	0.0175643	0.0168621	Seita.1G379700/Seita.7G096800/Seita.4G021600/Seita.5G315800/Seita.7G189300/Seita.9G041800/Seita.8G101900/Seita.2G042900/Seita.2G035400/Seita.5G087500/Seita.2G104900/Seita.9G061600/Seita.9G210000/Seita.7G116800/Seita.3G306600	15
Stem.Cluster_C	BP	GO:0001763	morphogenesis of a branching structure	13/1377	33/9983	0.000240716	0.0176635	0.0169573	Seita.5G387200/Seita.1G340400/Seita.3G223500/Seita.5G315800/Seita.7G078600/Seita.2G396100/Seita.5G285100/Seita.7G189300/Seita.8G101900/Seita.7G099000/Seita.5G285200/Seita.9G119800/Seita.9G165600	13
Stem.Cluster_C	BP	GO:0010223	secondary shoot formation	13/1377	33/9983	0.000240716	0.0176635	0.0169573	Seita.5G387200/Seita.1G340400/Seita.3G223500/Seita.5G315800/Seita.7G078600/Seita.2G396100/Seita.5G285100/Seita.7G189300/Seita.8G101900/Seita.7G099000/Seita.5G285200/Seita.9G119800/Seita.9G165600	13
Stem.Cluster_C	BP	GO:0010346	shoot axis formation	13/1377	33/9983	0.000240716	0.0176635	0.0169573	Seita.5G387200/Seita.1G340400/Seita.3G223500/Seita.5G315800/Seita.7G078600/Seita.2G396100/Seita.5G285100/Seita.7G189300/Seita.8G101900/Seita.7G099000/Seita.5G285200/Seita.9G119800/Seita.9G165600	13
Stem.Cluster_C	BP	GO:0034637	cellular carbohydrate biosynthetic process	38/1377	156/9983	0.000257964	0.0176635	0.0169573	Seita.1G080900/Seita.1G262000/Seita.2G209100/Seita.3G046000/Seita.3G132100/Seita.3G158400/Seita.3G158500/Seita.3G217800/Seita.5G319100/Seita.5G437300/Seita.6G094400/Seita.6G141700/Seita.7G264400/Seita.9G425900/Seita.9G440600/Seita.9G494200/Seita.3G332200/Seita.4G255400/Seita.7G264000/Seita.9G328900/Seita.1G323700/Seita.2G396200/Seita.3G235400/Seita.2G396100/Seita.3G176900/Seita.1G244200/Seita.1G3…	38
Stem.Cluster_C	BP	GO:0006714	sesquiterpenoid metabolic process	16/1377	46/9983	0.000263	0.0176635	0.0169573	Seita.1G379700/Seita.7G096800/Seita.4G021600/Seita.5G315800/Seita.7G189300/Seita.9G041800/Seita.8G101900/Seita.2G042900/Seita.2G035400/Seita.5G087500/Seita.2G104900/Seita.6G193700/Seita.9G061600/Seita.9G210000/Seita.7G116800/Seita.3G306600	16
Stem.Cluster_C	BP	GO:0005992	trehalose biosynthetic process	9/1377	18/9983	0.000264352	0.0176635	0.0169573	Seita.1G262000/Seita.6G141700/Seita.9G328900/Seita.1G323700/Seita.2G396200/Seita.2G396100/Seita.3G176900/Seita.9G381600/Seita.2G188200	9
Stem.Cluster_C	BP	GO:0009414	response to water deprivation	70/1377	340/9983	0.000292884	0.0180788	0.017356	Seita.5G319100/Seita.6G058300/Seita.7G096800/Seita.8G025400/Seita.4G021600/Seita.4G232000/Seita.7G213200/Seita.9G113200/Seita.4G092200/Seita.4G227700/Seita.6G073100/Seita.2G226700/Seita.5G000800/Seita.5G389300/Seita.9G041800/Seita.1G324300/Seita.3G144000/Seita.3G162400/Seita.5G166200/Seita.5G166300/Seita.5G351300/Seita.6G114000/Seita.6G178100/Seita.7G039700/Seita.7G121500/Seita.7G184600/Seita.7G2…	70
Stem.Cluster_C	BP	GO:0046677	response to antibiotic	63/1377	299/9983	0.000302045	0.0180788	0.017356	Seita.1G324800/Seita.1G358900/Seita.5G035900/Seita.5G201900/Seita.6G055900/Seita.7G220500/Seita.8G057800/Seita.8G112000/Seita.1G281500/Seita.2G441700/Seita.5G043400/Seita.9G113200/Seita.9G475100/Seita.5G421200/Seita.2G206000/Seita.3G192500/Seita.3G287100/Seita.6G203000/Seita.7G124900/Seita.9G435900/Seita.3G331100/Seita.8G244100/Seita.7G093900/Seita.1G012200/Seita.1G045200/Seita.2G090000/Seita.2G3…	63
Stem.Cluster_C	BP	GO:0009415	response to water	71/1377	347/9983	0.000321444	0.0180788	0.017356	Seita.5G319100/Seita.6G058300/Seita.7G096800/Seita.8G025400/Seita.4G021600/Seita.4G232000/Seita.7G213200/Seita.9G113200/Seita.4G092200/Seita.4G227700/Seita.6G073100/Seita.2G226700/Seita.5G000800/Seita.5G389300/Seita.9G041800/Seita.1G324300/Seita.3G144000/Seita.3G162400/Seita.5G166200/Seita.5G166300/Seita.5G351300/Seita.6G114000/Seita.6G178100/Seita.7G039700/Seita.7G121500/Seita.7G184600/Seita.7G2…	71
Stem.Cluster_C	BP	GO:0009687	abscisic acid metabolic process	13/1377	34/9983	0.000341004	0.0180788	0.017356	Seita.1G379700/Seita.7G096800/Seita.4G021600/Seita.9G041800/Seita.2G042900/Seita.2G035400/Seita.5G087500/Seita.2G104900/Seita.6G193700/Seita.9G061600/Seita.9G210000/Seita.7G116800/Seita.3G306600	13
Stem.Cluster_C	BP	GO:0043288	apocarotenoid metabolic process	13/1377	34/9983	0.000341004	0.0180788	0.017356	Seita.1G379700/Seita.7G096800/Seita.4G021600/Seita.9G041800/Seita.2G042900/Seita.2G035400/Seita.5G087500/Seita.2G104900/Seita.6G193700/Seita.9G061600/Seita.9G210000/Seita.7G116800/Seita.3G306600	13
Stem.Cluster_C	BP	GO:1902644	tertiary alcohol metabolic process	13/1377	34/9983	0.000341004	0.0180788	0.017356	Seita.1G379700/Seita.7G096800/Seita.4G021600/Seita.9G041800/Seita.2G042900/Seita.2G035400/Seita.5G087500/Seita.2G104900/Seita.6G193700/Seita.9G061600/Seita.9G210000/Seita.7G116800/Seita.3G306600	13
Stem.Cluster_C	BP	GO:0009644	response to high light intensity	23/1377	80/9983	0.000352067	0.0180788	0.017356	Seita.7G093900/Seita.1G012200/Seita.1G045200/Seita.3G175700/Seita.5G014300/Seita.5G092400/Seita.9G488400/Seita.5G207000/Seita.9G272800/Seita.9G457400/Seita.2G053800/Seita.2G164500/Seita.9G470600/Seita.2G046600/Seita.9G108100/Seita.7G257400/Seita.9G424800/Seita.4G099200/Seita.1G020100/Seita.2G352900/Seita.4G139900/Seita.6G082000/Seita.9G531900	23
Stem.Cluster_C	BP	GO:0009688	abscisic acid biosynthetic process	12/1377	30/9983	0.000352557	0.0180788	0.017356	Seita.1G379700/Seita.7G096800/Seita.4G021600/Seita.9G041800/Seita.2G042900/Seita.2G035400/Seita.5G087500/Seita.2G104900/Seita.9G061600/Seita.9G210000/Seita.7G116800/Seita.3G306600	12
Stem.Cluster_C	BP	GO:0043289	apocarotenoid biosynthetic process	12/1377	30/9983	0.000352557	0.0180788	0.017356	Seita.1G379700/Seita.7G096800/Seita.4G021600/Seita.9G041800/Seita.2G042900/Seita.2G035400/Seita.5G087500/Seita.2G104900/Seita.9G061600/Seita.9G210000/Seita.7G116800/Seita.3G306600	12
Stem.Cluster_C	BP	GO:1902645	tertiary alcohol biosynthetic process	12/1377	30/9983	0.000352557	0.0180788	0.017356	Seita.1G379700/Seita.7G096800/Seita.4G021600/Seita.9G041800/Seita.2G042900/Seita.2G035400/Seita.5G087500/Seita.2G104900/Seita.9G061600/Seita.9G210000/Seita.7G116800/Seita.3G306600	12
Stem.Cluster_C	BP	GO:0030001	metal ion transport	53/1377	243/9983	0.000373476	0.0187162	0.0179679	Seita.1G141800/Seita.1G175200/Seita.3G193100/Seita.3G208000/Seita.3G233000/Seita.4G181500/Seita.7G230500/Seita.8G025400/Seita.9G366600/Seita.9G558000/Seita.J004400/Seita.3G030500/Seita.5G192900/Seita.2G397300/Seita.4G175000/Seita.7G075500/Seita.7G194000/Seita.7G234300/Seita.9G240300/Seita.1G278500/Seita.2G426200/Seita.3G006100/Seita.3G049900/Seita.4G110300/Seita.4G242300/Seita.5G024400/Seita.7G18…	53
Stem.Cluster_C	BP	GO:0009409	response to cold	74/1377	368/9983	0.000416743	0.0202399	0.0194307	Seita.1G141800/Seita.1G262000/Seita.3G380200/Seita.8G025400/Seita.9G099700/Seita.9G162500/Seita.9G341100/Seita.9G440600/Seita.9G487500/Seita.4G048300/Seita.4G232000/Seita.5G043400/Seita.7G213200/Seita.5G421200/Seita.4G092200/Seita.2G226700/Seita.2G302400/Seita.6G163400/Seita.5G389300/Seita.1G192100/Seita.1G324300/Seita.3G144000/Seita.3G162400/Seita.3G276100/Seita.5G166200/Seita.5G166300/Seita.6G1…	74
Stem.Cluster_C	BP	GO:0015698	inorganic anion transport	26/1377	96/9983	0.000422239	0.0202399	0.0194307	Seita.5G198500/Seita.6G058300/Seita.9G136100/Seita.9G341100/Seita.J031500/Seita.1G360400/Seita.5G073800/Seita.5G326900/Seita.5G461300/Seita.9G506300/Seita.1G278500/Seita.2G302400/Seita.5G000800/Seita.5G286900/Seita.9G235900/Seita.9G506200/Seita.3G402300/Seita.1G257200/Seita.3G406500/Seita.9G532700/Seita.5G243200/Seita.7G213800/Seita.7G108900/Seita.3G283100/Seita.3G283600/Seita.3G283500	26
Stem.Cluster_C	BP	GO:0009408	response to heat	45/1377	199/9983	0.000444809	0.0208682	0.0200338	Seita.4G237700/Seita.7G096800/Seita.9G363400/Seita.1G326600/Seita.4G227700/Seita.2G226700/Seita.2G332600/Seita.7G093900/Seita.9G041800/Seita.2G287200/Seita.1G012200/Seita.1G045200/Seita.1G203200/Seita.1G324300/Seita.3G175700/Seita.3G242900/Seita.4G267900/Seita.5G092400/Seita.5G093000/Seita.5G131300/Seita.5G137400/Seita.9G157700/Seita.9G488400/Seita.5G207000/Seita.5G403700/Seita.9G106800/Seita.1G1…	45
Stem.Cluster_C	BP	GO:0016051	carbohydrate biosynthetic process	49/1377	223/9983	0.000512113	0.0235252	0.0225846	Seita.1G080900/Seita.1G262000/Seita.2G209100/Seita.3G046000/Seita.3G132100/Seita.3G158400/Seita.3G158500/Seita.3G217800/Seita.3G346000/Seita.5G319100/Seita.5G437300/Seita.6G094400/Seita.6G141700/Seita.7G264400/Seita.9G425900/Seita.9G434100/Seita.9G440600/Seita.9G494200/Seita.3G332200/Seita.4G255400/Seita.7G264000/Seita.9G328900/Seita.1G323700/Seita.2G396200/Seita.3G235400/Seita.2G396100/Seita.3G1…	49
Stem.Cluster_C	BP	GO:0010383	cell wall polysaccharide metabolic process	27/1377	104/9983	0.000681655	0.0306745	0.0294481	Seita.1G080900/Seita.3G046000/Seita.3G132100/Seita.3G158400/Seita.3G158500/Seita.3G217800/Seita.5G437300/Seita.7G264400/Seita.8G081100/Seita.9G260200/Seita.9G425900/Seita.9G440600/Seita.9G494200/Seita.4G255400/Seita.7G264000/Seita.3G235400/Seita.9G542400/Seita.5G053200/Seita.2G439200/Seita.5G053000/Seita.7G257800/Seita.8G128800/Seita.9G037100/Seita.9G441000/Seita.2G193300/Seita.1G325200/Seita.8G0…	27
Stem.Cluster_C	BP	GO:0006812	cation transport	80/1377	415/9983	0.000945066	0.0416774	0.0400111	Seita.1G141800/Seita.1G175200/Seita.2G374400/Seita.3G193100/Seita.3G208000/Seita.3G233000/Seita.4G006600/Seita.4G181500/Seita.6G001600/Seita.7G120800/Seita.7G230500/Seita.8G025400/Seita.9G136100/Seita.9G311800/Seita.9G366600/Seita.9G558000/Seita.J004400/Seita.1G207000/Seita.3G030500/Seita.5G192900/Seita.9G579300/Seita.J031500/Seita.1G055500/Seita.2G397300/Seita.4G005300/Seita.4G006500/Seita.4G175…	80
Stem.Cluster_C	BP	GO:0055081	anion homeostasis	14/1377	42/9983	0.00102234	0.0442012	0.042434	Seita.1G141800/Seita.3G193100/Seita.8G025400/Seita.9G475100/Seita.1G333100/Seita.4G083300/Seita.9G277500/Seita.1G256100/Seita.3G243700/Seita.2G302100/Seita.7G193300/Seita.9G475300/Seita.3G243500/Seita.4G117000	14
Stem.Cluster_C	BP	GO:0009624	response to nematode	24/1377	91/9983	0.00104287	0.0442217	0.0424537	Seita.1G141800/Seita.3G193100/Seita.4G231500/Seita.8G025400/Seita.2G441700/Seita.7G064200/Seita.7G298300/Seita.8G084200/Seita.9G435900/Seita.4G106500/Seita.7G273400/Seita.2G090200/Seita.2G335600/Seita.7G039700/Seita.7G228200/Seita.9G416600/Seita.3G209900/Seita.8G005600/Seita.5G039100/Seita.7G039900/Seita.4G237500/Seita.6G020900/Seita.6G214700/Seita.6G253500	24
Stem.Cluster_C	BP	GO:0009809	lignin biosynthetic process	15/1377	47/9983	0.00113754	0.047326	0.0454339	Seita.1G230100/Seita.3G194300/Seita.4G181500/Seita.6G055900/Seita.7G155700/Seita.7G220500/Seita.8G252500/Seita.1G281500/Seita.4G048300/Seita.8G126500/Seita.6G163400/Seita.3G402300/Seita.5G053200/Seita.8G153700/Seita.5G053000	15
Stem.Cluster_C	CC	GO:0031226	intrinsic component of plasma membrane	77/1293	331/9955	1.37173e-07	2.27191e-05	2.16754e-05	Seita.1G092000/Seita.2G154700/Seita.2G250200/Seita.2G327700/Seita.2G412000/Seita.3G193100/Seita.3G225200/Seita.3G233000/Seita.4G006600/Seita.5G104100/Seita.5G403300/Seita.5G448400/Seita.8G025400/Seita.9G363400/Seita.9G486000/Seita.4G257500/Seita.5G043400/Seita.3G333100/Seita.1G333100/Seita.2G115900/Seita.2G166300/Seita.2G166600/Seita.4G005300/Seita.4G006500/Seita.4G051900/Seita.4G098700/Seita.7G1…	77
Stem.Cluster_C	CC	GO:0030312	external encapsulating structure	104/1293	491/9955	1.51968e-07	2.27191e-05	2.16754e-05	Seita.1G092000/Seita.2G154700/Seita.5G118800/Seita.5G319100/Seita.5G448400/Seita.6G001600/Seita.6G141700/Seita.8G097000/Seita.9G148700/Seita.9G326900/Seita.9G363400/Seita.9G486000/Seita.9G519500/Seita.4G021600/Seita.5G409400/Seita.1G340400/Seita.1G323700/Seita.2G396200/Seita.5G118700/Seita.6G196900/Seita.8G206900/Seita.9G073700/Seita.9G414700/Seita.1G317400/Seita.2G396100/Seita.3G270300/Seita.4G1…	104
Stem.Cluster_C	CC	GO:0005618	cell wall	103/1293	490/9955	2.58879e-07	2.58016e-05	2.46162e-05	Seita.1G092000/Seita.2G154700/Seita.5G118800/Seita.5G319100/Seita.5G448400/Seita.6G001600/Seita.6G141700/Seita.8G097000/Seita.9G148700/Seita.9G326900/Seita.9G363400/Seita.9G486000/Seita.9G519500/Seita.4G021600/Seita.5G409400/Seita.1G340400/Seita.1G323700/Seita.2G396200/Seita.5G118700/Seita.8G206900/Seita.9G073700/Seita.9G414700/Seita.1G317400/Seita.2G396100/Seita.3G270300/Seita.4G101300/Seita.9G3…	103
Stem.Cluster_C	CC	GO:0005887	integral component of plasma membrane	54/1293	211/9955	4.55598e-07	3.40559e-05	3.24913e-05	Seita.3G193100/Seita.3G233000/Seita.4G006600/Seita.5G104100/Seita.5G403300/Seita.8G025400/Seita.4G257500/Seita.5G043400/Seita.3G333100/Seita.1G333100/Seita.2G115900/Seita.2G166300/Seita.2G166600/Seita.4G005300/Seita.4G006500/Seita.4G051900/Seita.4G098700/Seita.7G194000/Seita.9G506300/Seita.1G135500/Seita.3G244500/Seita.4G083300/Seita.4G110300/Seita.5G351800/Seita.6G251100/Seita.9G235900/Seita.9G2…	54
Stem.Cluster_C	CC	GO:0042788	polysomal ribosome	21/1293	58/9955	5.77794e-06	0.000345521	0.000329647	Seita.2G055300/Seita.2G079700/Seita.2G267400/Seita.2G389700/Seita.3G197300/Seita.6G112100/Seita.8G046000/Seita.9G044700/Seita.3G280800/Seita.4G177300/Seita.6G017200/Seita.6G085600/Seita.6G224900/Seita.7G099000/Seita.7G166100/Seita.7G228400/Seita.9G131800/Seita.9G502500/Seita.9G517100/Seita.7G290900/Seita.7G314300	21
Stem.Cluster_C	CC	GO:0005844	polysome	21/1293	72/9955	0.000220518	0.0109891	0.0104843	Seita.2G055300/Seita.2G079700/Seita.2G267400/Seita.2G389700/Seita.3G197300/Seita.6G112100/Seita.8G046000/Seita.9G044700/Seita.3G280800/Seita.4G177300/Seita.6G017200/Seita.6G085600/Seita.6G224900/Seita.7G099000/Seita.7G166100/Seita.7G228400/Seita.9G131800/Seita.9G502500/Seita.9G517100/Seita.7G290900/Seita.7G314300	21
Stem.Cluster_C	MF	GO:0004805	trehalose-phosphatase activity	8/1188	11/8539	1.53215e-05	0.0081817	0.00748336	Seita.1G262000/Seita.6G141700/Seita.9G328900/Seita.1G323700/Seita.2G396200/Seita.2G396100/Seita.9G381600/Seita.2G188200	8
Stem.Cluster_C	MF	GO:0015171	amino acid transmembrane transporter activity	21/1188	61/8539	4.06427e-05	0.0108516	0.00992538	Seita.4G006600/Seita.5G387200/Seita.9G299000/Seita.9G311800/Seita.1G333100/Seita.3G223500/Seita.4G005300/Seita.4G006500/Seita.7G298300/Seita.4G083300/Seita.9G277500/Seita.1G268000/Seita.2G090200/Seita.5G026800/Seita.5G365100/Seita.7G037100/Seita.7G125900/Seita.8G047400/Seita.9G431100/Seita.1G001100/Seita.9G311700	21
Stem.Cluster_C	MF	GO:0016722	oxidoreductase activity, oxidizing metal ions	14/1188	36/8539	0.000179135	0.031886	0.0291644	Seita.3G151800/Seita.3G218000/Seita.5G377700/Seita.8G252500/Seita.9G453900/Seita.5G085900/Seita.5G342100/Seita.8G210700/Seita.8G211700/Seita.9G192300/Seita.5G365900/Seita.5G378200/Seita.7G330200/Seita.8G018100	14
Stem.Cluster_C	MF	GO:0016168	chlorophyll binding	8/1188	15/8539	0.000355102	0.0474061	0.0433598	Seita.2G217800/Seita.7G257400/Seita.2G351600/Seita.2G352900/Seita.3G143800/Seita.4G139900/Seita.8G080900/Seita.9G177100	8
Stem.Cluster_D	BP	GO:0009834	plant-type secondary cell wall biogenesis	22/272	73/9983	1.19652e-17	1.57103e-14	1.47487e-14	Seita.1G080900/Seita.2G209100/Seita.3G046000/Seita.3G132100/Seita.3G136800/Seita.3G158400/Seita.3G158500/Seita.3G217800/Seita.5G242700/Seita.5G319100/Seita.5G363400/Seita.5G437300/Seita.7G220500/Seita.7G264400/Seita.7G272500/Seita.8G252500/Seita.9G425900/Seita.9G560500/Seita.1G281500/Seita.4G255400/Seita.9G113200/Seita.7G264000	22
Stem.Cluster_D	BP	GO:0009832	plant-type cell wall biogenesis	25/272	147/9983	1.48032e-13	9.71829e-11	9.12343e-11	Seita.1G080900/Seita.2G209100/Seita.3G046000/Seita.3G132100/Seita.3G136800/Seita.3G158400/Seita.3G158500/Seita.3G217800/Seita.5G242700/Seita.5G319100/Seita.5G363400/Seita.5G437300/Seita.7G220500/Seita.7G264400/Seita.7G272500/Seita.8G252500/Seita.9G425900/Seita.9G434100/Seita.9G494200/Seita.9G560500/Seita.1G281500/Seita.3G332200/Seita.4G255400/Seita.9G113200/Seita.7G264000	25
Stem.Cluster_D	BP	GO:0042546	cell wall biogenesis	26/272	169/9983	5.40871e-13	2.36721e-10	2.22232e-10	Seita.1G080900/Seita.2G209100/Seita.3G046000/Seita.3G132100/Seita.3G136800/Seita.3G158400/Seita.3G158500/Seita.3G217800/Seita.5G242700/Seita.5G319100/Seita.5G363400/Seita.5G437300/Seita.7G220500/Seita.7G264400/Seita.7G272500/Seita.8G252500/Seita.9G425900/Seita.9G434100/Seita.9G440600/Seita.9G494200/Seita.9G560500/Seita.1G281500/Seita.3G332200/Seita.4G255400/Seita.9G113200/Seita.7G264000	26
Stem.Cluster_D	BP	GO:0045492	xylan biosynthetic process	12/272	31/9983	1.17036e-11	3.8417e-09	3.60655e-09	Seita.1G080900/Seita.3G046000/Seita.3G132100/Seita.3G158400/Seita.3G158500/Seita.3G217800/Seita.5G437300/Seita.7G264400/Seita.9G425900/Seita.9G440600/Seita.4G255400/Seita.7G264000	12
Stem.Cluster_D	BP	GO:0044038	cell wall macromolecule biosynthetic process	13/272	49/9983	3.747e-10	7.0283e-08	6.5981e-08	Seita.1G080900/Seita.3G046000/Seita.3G132100/Seita.3G158400/Seita.3G158500/Seita.3G217800/Seita.5G437300/Seita.7G264400/Seita.9G425900/Seita.9G440600/Seita.9G494200/Seita.4G255400/Seita.7G264000	13
Stem.Cluster_D	BP	GO:0070589	cellular component macromolecule biosynthetic process	13/272	49/9983	3.747e-10	7.0283e-08	6.5981e-08	Seita.1G080900/Seita.3G046000/Seita.3G132100/Seita.3G158400/Seita.3G158500/Seita.3G217800/Seita.5G437300/Seita.7G264400/Seita.9G425900/Seita.9G440600/Seita.9G494200/Seita.4G255400/Seita.7G264000	13
Stem.Cluster_D	BP	GO:0070592	cell wall polysaccharide biosynthetic process	13/272	49/9983	3.747e-10	7.0283e-08	6.5981e-08	Seita.1G080900/Seita.3G046000/Seita.3G132100/Seita.3G158400/Seita.3G158500/Seita.3G217800/Seita.5G437300/Seita.7G264400/Seita.9G425900/Seita.9G440600/Seita.9G494200/Seita.4G255400/Seita.7G264000	13
Stem.Cluster_D	BP	GO:0045491	xylan metabolic process	13/272	51/9983	6.47234e-10	1.06227e-07	9.97252e-08	Seita.1G080900/Seita.3G046000/Seita.3G132100/Seita.3G158400/Seita.3G158500/Seita.3G217800/Seita.5G437300/Seita.7G264400/Seita.8G081100/Seita.9G425900/Seita.9G440600/Seita.4G255400/Seita.7G264000	13
Stem.Cluster_D	BP	GO:0071669	plant-type cell wall organization or biogenesis	26/272	257/9983	7.05563e-09	1.0051e-06	9.4358e-07	Seita.1G080900/Seita.2G209100/Seita.3G046000/Seita.3G132100/Seita.3G136800/Seita.3G158400/Seita.3G158500/Seita.3G217800/Seita.5G242700/Seita.5G319100/Seita.5G363400/Seita.5G437300/Seita.7G220500/Seita.7G264400/Seita.7G272500/Seita.8G252500/Seita.9G326900/Seita.9G425900/Seita.9G434100/Seita.9G494200/Seita.9G560500/Seita.1G281500/Seita.3G332200/Seita.4G255400/Seita.9G113200/Seita.7G264000	26
Stem.Cluster_D	BP	GO:0034637	cellular carbohydrate biosynthetic process	20/272	156/9983	7.655e-09	1.0051e-06	9.4358e-07	Seita.1G080900/Seita.1G262000/Seita.2G209100/Seita.3G046000/Seita.3G132100/Seita.3G158400/Seita.3G158500/Seita.3G217800/Seita.5G319100/Seita.5G437300/Seita.6G094400/Seita.6G141700/Seita.7G264400/Seita.9G425900/Seita.9G440600/Seita.9G494200/Seita.3G332200/Seita.4G255400/Seita.7G264000/Seita.9G328900	20
Stem.Cluster_D	BP	GO:0010410	hemicellulose metabolic process	14/272	77/9983	1.60797e-08	1.91933e-06	1.80185e-06	Seita.1G080900/Seita.3G046000/Seita.3G132100/Seita.3G158400/Seita.3G158500/Seita.3G217800/Seita.5G437300/Seita.7G264400/Seita.8G081100/Seita.9G260200/Seita.9G425900/Seita.9G440600/Seita.4G255400/Seita.7G264000	14
Stem.Cluster_D	BP	GO:0071554	cell wall organization or biogenesis	33/272	409/9983	1.88699e-08	2.06468e-06	1.9383e-06	Seita.1G080900/Seita.2G209100/Seita.3G046000/Seita.3G132100/Seita.3G136800/Seita.3G158400/Seita.3G158500/Seita.3G217800/Seita.4G181500/Seita.5G242700/Seita.5G319100/Seita.5G363400/Seita.5G437300/Seita.7G220500/Seita.7G264400/Seita.7G272500/Seita.8G081100/Seita.8G252500/Seita.9G260200/Seita.9G326900/Seita.9G363400/Seita.9G425900/Seita.9G434100/Seita.9G440600/Seita.9G494200/Seita.9G560500/Seita.1G2…	33
Stem.Cluster_D	BP	GO:0010383	cell wall polysaccharide metabolic process	15/272	104/9983	1.24978e-07	1.26228e-05	1.18502e-05	Seita.1G080900/Seita.3G046000/Seita.3G132100/Seita.3G158400/Seita.3G158500/Seita.3G217800/Seita.5G437300/Seita.7G264400/Seita.8G081100/Seita.9G260200/Seita.9G425900/Seita.9G440600/Seita.9G494200/Seita.4G255400/Seita.7G264000	15
Stem.Cluster_D	BP	GO:0016051	carbohydrate biosynthetic process	22/272	223/9983	1.67707e-07	1.57285e-05	1.47658e-05	Seita.1G080900/Seita.1G262000/Seita.2G209100/Seita.3G046000/Seita.3G132100/Seita.3G158400/Seita.3G158500/Seita.3G217800/Seita.3G346000/Seita.5G319100/Seita.5G437300/Seita.6G094400/Seita.6G141700/Seita.7G264400/Seita.9G425900/Seita.9G434100/Seita.9G440600/Seita.9G494200/Seita.3G332200/Seita.4G255400/Seita.7G264000/Seita.9G328900	22
Stem.Cluster_D	BP	GO:0044036	cell wall macromolecule metabolic process	16/272	125/9983	2.57681e-07	2.25557e-05	2.11751e-05	Seita.1G080900/Seita.2G209100/Seita.3G046000/Seita.3G132100/Seita.3G158400/Seita.3G158500/Seita.3G217800/Seita.5G437300/Seita.7G264400/Seita.8G081100/Seita.9G260200/Seita.9G425900/Seita.9G440600/Seita.9G494200/Seita.4G255400/Seita.7G264000	16
Stem.Cluster_D	BP	GO:0033692	cellular polysaccharide biosynthetic process	16/272	126/9983	2.88032e-07	2.36366e-05	2.21898e-05	Seita.1G080900/Seita.2G209100/Seita.3G046000/Seita.3G132100/Seita.3G158400/Seita.3G158500/Seita.3G217800/Seita.5G319100/Seita.5G437300/Seita.7G264400/Seita.9G425900/Seita.9G440600/Seita.9G494200/Seita.3G332200/Seita.4G255400/Seita.7G264000	16
Stem.Cluster_D	BP	GO:0009699	phenylpropanoid biosynthetic process	14/272	99/9983	4.25312e-07	3.28491e-05	3.08384e-05	Seita.1G230100/Seita.3G194300/Seita.3G394400/Seita.4G181500/Seita.4G191500/Seita.6G055900/Seita.6G244100/Seita.7G155700/Seita.7G220500/Seita.8G252500/Seita.1G065800/Seita.1G281500/Seita.4G021600/Seita.4G048300	14
Stem.Cluster_D	BP	GO:0009698	phenylpropanoid metabolic process	15/272	120/9983	8.38349e-07	6.11529e-05	5.74097e-05	Seita.1G230100/Seita.3G194300/Seita.3G394400/Seita.4G181500/Seita.4G191500/Seita.6G055900/Seita.6G244100/Seita.7G155700/Seita.7G220500/Seita.8G252500/Seita.1G065800/Seita.1G281500/Seita.4G021600/Seita.4G048300/Seita.5G274700	15
Stem.Cluster_D	BP	GO:0000271	polysaccharide biosynthetic process	16/272	140/9983	1.22406e-06	8.45887e-05	7.9411e-05	Seita.1G080900/Seita.2G209100/Seita.3G046000/Seita.3G132100/Seita.3G158400/Seita.3G158500/Seita.3G217800/Seita.5G319100/Seita.5G437300/Seita.7G264400/Seita.9G425900/Seita.9G440600/Seita.9G494200/Seita.3G332200/Seita.4G255400/Seita.7G264000	16
Stem.Cluster_D	BP	GO:0009809	lignin biosynthetic process	9/272	47/9983	3.98567e-06	0.000261659	0.000245643	Seita.1G230100/Seita.3G194300/Seita.4G181500/Seita.6G055900/Seita.7G155700/Seita.7G220500/Seita.8G252500/Seita.1G281500/Seita.4G048300	9
Stem.Cluster_D	BP	GO:2000652	regulation of secondary cell wall biogenesis	7/272	26/9983	4.35343e-06	0.000272193	0.000255532	Seita.3G136800/Seita.5G242700/Seita.5G363400/Seita.7G220500/Seita.9G560500/Seita.1G281500/Seita.9G113200	7
Stem.Cluster_D	BP	GO:0010413	glucuronoxylan metabolic process	6/272	18/9983	5.45573e-06	0.000311451	0.000292387	Seita.3G046000/Seita.3G158400/Seita.3G158500/Seita.3G217800/Seita.5G437300/Seita.7G264400	6
Stem.Cluster_D	BP	GO:0010417	glucuronoxylan biosynthetic process	6/272	18/9983	5.45573e-06	0.000311451	0.000292387	Seita.3G046000/Seita.3G158400/Seita.3G158500/Seita.3G217800/Seita.5G437300/Seita.7G264400	6
Stem.Cluster_D	BP	GO:0044262	cellular carbohydrate metabolic process	22/272	299/9983	2.18353e-05	0.00119457	0.00112145	Seita.1G080900/Seita.1G262000/Seita.2G209100/Seita.3G046000/Seita.3G132100/Seita.3G158400/Seita.3G158500/Seita.3G217800/Seita.4G240700/Seita.5G319100/Seita.5G437300/Seita.6G094400/Seita.6G141700/Seita.7G264400/Seita.9G260200/Seita.9G425900/Seita.9G440600/Seita.9G494200/Seita.3G332200/Seita.4G255400/Seita.7G264000/Seita.9G328900	22
Stem.Cluster_D	BP	GO:0009808	lignin metabolic process	9/272	58/9983	2.39643e-05	0.00125861	0.00118157	Seita.1G230100/Seita.3G194300/Seita.4G181500/Seita.6G055900/Seita.7G155700/Seita.7G220500/Seita.8G252500/Seita.1G281500/Seita.4G048300	9
Stem.Cluster_D	BP	GO:0044264	cellular polysaccharide metabolic process	17/272	197/9983	2.617e-05	0.00132159	0.00124069	Seita.1G080900/Seita.2G209100/Seita.3G046000/Seita.3G132100/Seita.3G158400/Seita.3G158500/Seita.3G217800/Seita.5G319100/Seita.5G437300/Seita.7G264400/Seita.9G260200/Seita.9G425900/Seita.9G440600/Seita.9G494200/Seita.3G332200/Seita.4G255400/Seita.7G264000	17
Stem.Cluster_D	BP	GO:1903338	regulation of cell wall organization or biogenesis	7/272	34/9983	2.95361e-05	0.00139046	0.00130535	Seita.3G136800/Seita.5G242700/Seita.5G363400/Seita.7G220500/Seita.9G560500/Seita.1G281500/Seita.9G113200	7
Stem.Cluster_D	BP	GO:0019748	secondary metabolic process	22/272	305/9983	2.96518e-05	0.00139046	0.00130535	Seita.1G230100/Seita.1G379700/Seita.3G097400/Seita.3G194300/Seita.3G394400/Seita.4G181500/Seita.4G191500/Seita.4G239300/Seita.5G035900/Seita.5G090200/Seita.6G055900/Seita.6G244100/Seita.7G096800/Seita.7G155700/Seita.7G220500/Seita.8G252500/Seita.1G065800/Seita.1G281500/Seita.4G021600/Seita.4G048300/Seita.4G232000/Seita.5G274700	22
Stem.Cluster_D	BP	GO:0007018	microtubule-based movement	10/272	77/9983	4.19021e-05	0.00189715	0.00178103	Seita.1G005900/Seita.1G291400/Seita.1G310000/Seita.3G340900/Seita.4G085500/Seita.5G055100/Seita.6G237500/Seita.7G183000/Seita.7G248700/Seita.8G215500	10
Stem.Cluster_D	BP	GO:0007017	microtubule-based process	14/272	169/9983	0.00020843	0.00912227	0.0085639	Seita.1G005900/Seita.1G235000/Seita.1G291400/Seita.1G310000/Seita.2G031200/Seita.3G340900/Seita.4G085500/Seita.5G055100/Seita.6G237500/Seita.7G183000/Seita.7G248700/Seita.8G215500/Seita.1G364800/Seita.3G233500	14
Stem.Cluster_D	BP	GO:0005975	carbohydrate metabolic process	27/272	474/9983	0.000223947	0.00948523	0.00890464	Seita.1G080900/Seita.1G262000/Seita.2G209100/Seita.3G046000/Seita.3G132100/Seita.3G158400/Seita.3G158500/Seita.3G217800/Seita.3G346000/Seita.4G055500/Seita.4G240700/Seita.5G319100/Seita.5G373800/Seita.5G437300/Seita.6G094400/Seita.6G141700/Seita.7G264400/Seita.8G081100/Seita.9G260200/Seita.9G425900/Seita.9G434100/Seita.9G440600/Seita.9G494200/Seita.3G332200/Seita.4G255400/Seita.7G264000/Seita.9G3…	27
Stem.Cluster_D	BP	GO:0009812	flavonoid metabolic process	11/272	113/9983	0.00024897	0.0102156	0.00959027	Seita.1G043800/Seita.1G230100/Seita.3G134800/Seita.3G194300/Seita.5G356600/Seita.6G055900/Seita.7G155700/Seita.7G301600/Seita.8G013300/Seita.5G274700/Seita.9G034700	11
Stem.Cluster_D	BP	GO:0005976	polysaccharide metabolic process	18/272	260/9983	0.000264431	0.0105211	0.00987714	Seita.1G080900/Seita.2G209100/Seita.3G046000/Seita.3G132100/Seita.3G158400/Seita.3G158500/Seita.3G217800/Seita.5G319100/Seita.5G437300/Seita.7G264400/Seita.8G081100/Seita.9G260200/Seita.9G425900/Seita.9G440600/Seita.9G494200/Seita.3G332200/Seita.4G255400/Seita.7G264000	18
Stem.Cluster_D	BP	GO:0044550	secondary metabolite biosynthetic process	16/272	218/9983	0.00030211	0.0116108	0.0109001	Seita.1G230100/Seita.3G194300/Seita.3G394400/Seita.4G181500/Seita.4G191500/Seita.5G035900/Seita.6G055900/Seita.6G244100/Seita.7G096800/Seita.7G155700/Seita.7G220500/Seita.8G252500/Seita.1G065800/Seita.1G281500/Seita.4G021600/Seita.4G048300	16
Stem.Cluster_D	BP	GO:0009813	flavonoid biosynthetic process	9/272	80/9983	0.000309503	0.0116108	0.0109001	Seita.1G230100/Seita.3G134800/Seita.3G194300/Seita.6G055900/Seita.7G155700/Seita.7G301600/Seita.8G013300/Seita.5G274700/Seita.9G034700	9
Stem.Cluster_D	BP	GO:0048640	negative regulation of developmental growth	5/272	24/9983	0.000402026	0.0146628	0.0137653	Seita.1G305000/Seita.3G136800/Seita.3G375500/Seita.4G247100/Seita.5G242700	5
Stem.Cluster_D	BP	GO:0030031	cell projection assembly	6/272	41/9983	0.000780602	0.0277008	0.0260053	Seita.1G005900/Seita.1G291400/Seita.1G310000/Seita.2G031200/Seita.7G163400/Seita.3G233500	6
Stem.Cluster_D	BP	GO:0060271	cilium assembly	5/272	29/9983	0.00100491	0.0347225	0.0325971	Seita.1G005900/Seita.1G291400/Seita.1G310000/Seita.2G031200/Seita.3G233500	5
Stem.Cluster_D	BP	GO:0006928	movement of cell or subcellular component	11/272	139/9983	0.0014355	0.0483286	0.0453704	Seita.1G005900/Seita.1G291400/Seita.1G310000/Seita.3G340900/Seita.4G085500/Seita.5G055100/Seita.6G237500/Seita.7G183000/Seita.7G203700/Seita.7G248700/Seita.8G215500	11
Stem.Cluster_D	CC	GO:0005874	microtubule	11/257	90/9955	1.87833e-05	0.00113692	0.000982766	Seita.1G005900/Seita.1G235000/Seita.2G031200/Seita.3G046100/Seita.4G069300/Seita.4G085500/Seita.6G222800/Seita.6G237500/Seita.7G183000/Seita.7G248700/Seita.1G364800	11
Stem.Cluster_D	CC	GO:0031410	cytoplasmic vesicle	28/257	466/9955	2.59406e-05	0.00113692	0.000982766	Seita.1G120000/Seita.1G175200/Seita.1G300500/Seita.2G031200/Seita.2G325500/Seita.2G367900/Seita.2G406100/Seita.3G115200/Seita.3G158400/Seita.3G158500/Seita.3G217800/Seita.3G228400/Seita.4G185100/Seita.4G196400/Seita.5G117400/Seita.5G405000/Seita.5G437300/Seita.6G001600/Seita.7G264400/Seita.8G018300/Seita.8G025000/Seita.8G045900/Seita.8G049400/Seita.9G016900/Seita.9G053300/Seita.4G257500/Seita.7G2…	28
Stem.Cluster_D	CC	GO:0097708	intracellular vesicle	28/257	471/9955	3.14415e-05	0.00113692	0.000982766	Seita.1G120000/Seita.1G175200/Seita.1G300500/Seita.2G031200/Seita.2G325500/Seita.2G367900/Seita.2G406100/Seita.3G115200/Seita.3G158400/Seita.3G158500/Seita.3G217800/Seita.3G228400/Seita.4G185100/Seita.4G196400/Seita.5G117400/Seita.5G405000/Seita.5G437300/Seita.6G001600/Seita.7G264400/Seita.8G018300/Seita.8G025000/Seita.8G045900/Seita.8G049400/Seita.9G016900/Seita.9G053300/Seita.4G257500/Seita.7G2…	28
Stem.Cluster_D	CC	GO:0099081	supramolecular polymer	12/257	116/9955	4.30534e-05	0.00113692	0.000982766	Seita.1G005900/Seita.1G235000/Seita.2G031200/Seita.3G046100/Seita.4G069300/Seita.4G085500/Seita.6G222800/Seita.6G237500/Seita.7G183000/Seita.7G248700/Seita.1G364800/Seita.2G045800	12
Stem.Cluster_D	CC	GO:0099512	supramolecular fiber	12/257	116/9955	4.30534e-05	0.00113692	0.000982766	Seita.1G005900/Seita.1G235000/Seita.2G031200/Seita.3G046100/Seita.4G069300/Seita.4G085500/Seita.6G222800/Seita.6G237500/Seita.7G183000/Seita.7G248700/Seita.1G364800/Seita.2G045800	12
Stem.Cluster_D	CC	GO:0099513	polymeric cytoskeletal fiber	11/257	101/9955	5.58692e-05	0.00113692	0.000982766	Seita.1G005900/Seita.1G235000/Seita.2G031200/Seita.3G046100/Seita.4G069300/Seita.4G085500/Seita.6G222800/Seita.6G237500/Seita.7G183000/Seita.7G248700/Seita.1G364800	11
Stem.Cluster_D	CC	GO:0015630	microtubule cytoskeleton	17/257	221/9955	5.71198e-05	0.00113692	0.000982766	Seita.1G005900/Seita.1G235000/Seita.1G310000/Seita.2G031200/Seita.3G046100/Seita.3G340900/Seita.4G069300/Seita.4G085500/Seita.5G055100/Seita.6G222800/Seita.6G237500/Seita.7G183000/Seita.7G248700/Seita.8G215500/Seita.9G114600/Seita.9G475700/Seita.1G364800	17
Stem.Cluster_D	CC	GO:0099080	supramolecular complex	12/257	120/9955	6.0234e-05	0.00113692	0.000982766	Seita.1G005900/Seita.1G235000/Seita.2G031200/Seita.3G046100/Seita.4G069300/Seita.4G085500/Seita.6G222800/Seita.6G237500/Seita.7G183000/Seita.7G248700/Seita.1G364800/Seita.2G045800	12
Stem.Cluster_D	CC	GO:0005856	cytoskeleton	21/257	317/9955	7.07205e-05	0.00118653	0.00102565	Seita.1G005900/Seita.1G235000/Seita.1G310000/Seita.2G031200/Seita.3G046100/Seita.3G340900/Seita.4G069300/Seita.4G085500/Seita.5G055100/Seita.5G369600/Seita.6G222800/Seita.6G237500/Seita.7G163400/Seita.7G183000/Seita.7G248700/Seita.8G215500/Seita.9G114600/Seita.9G148700/Seita.9G475700/Seita.1G364800/Seita.3G242000	21
Stem.Cluster_D	CC	GO:0031982	vesicle	28/257	497/9955	8.10852e-05	0.00122439	0.00105838	Seita.1G120000/Seita.1G175200/Seita.1G300500/Seita.2G031200/Seita.2G325500/Seita.2G367900/Seita.2G406100/Seita.3G115200/Seita.3G158400/Seita.3G158500/Seita.3G217800/Seita.3G228400/Seita.4G185100/Seita.4G196400/Seita.5G117400/Seita.5G405000/Seita.5G437300/Seita.6G001600/Seita.7G264400/Seita.8G018300/Seita.8G025000/Seita.8G045900/Seita.8G049400/Seita.9G016900/Seita.9G053300/Seita.4G257500/Seita.7G2…	28
Stem.Cluster_D	CC	GO:0009524	phragmoplast	8/257	63/9955	0.000200575	0.00275334	0.00238002	Seita.1G235000/Seita.2G031200/Seita.6G001600/Seita.6G222800/Seita.7G248700/Seita.9G114600/Seita.9G475700/Seita.1G364800	8
Stem.Cluster_D	CC	GO:0005768	endosome	21/257	361/9955	0.000426192	0.00536292	0.00463577	Seita.1G120000/Seita.1G175200/Seita.1G300500/Seita.2G406100/Seita.3G115200/Seita.3G158400/Seita.3G158500/Seita.3G217800/Seita.3G228400/Seita.4G185100/Seita.4G196400/Seita.5G405000/Seita.5G437300/Seita.6G001600/Seita.7G264400/Seita.8G018300/Seita.8G025000/Seita.8G045900/Seita.9G016900/Seita.7G239900/Seita.3G333100	21
Stem.Cluster_D	CC	GO:0005871	kinesin complex	7/257	59/9955	0.000763829	0.00887216	0.00766921	Seita.3G340900/Seita.4G085500/Seita.5G055100/Seita.6G237500/Seita.7G183000/Seita.7G248700/Seita.8G215500	7
Stem.Cluster_D	CC	GO:0005802	trans-Golgi network	15/257	230/9955	0.000906886	0.00978142	0.00845518	Seita.1G300500/Seita.3G158400/Seita.3G158500/Seita.3G217800/Seita.3G228400/Seita.4G185100/Seita.4G196400/Seita.4G237700/Seita.5G405000/Seita.5G437300/Seita.6G001600/Seita.7G264400/Seita.8G018300/Seita.8G025000/Seita.8G045900	15
Stem.Cluster_D	CC	GO:0005875	microtubule associated complex	8/257	83/9955	0.00131145	0.0132019	0.0114119	Seita.1G310000/Seita.3G340900/Seita.4G085500/Seita.5G055100/Seita.6G237500/Seita.7G183000/Seita.7G248700/Seita.8G215500	8
Stem.Cluster_D	CC	GO:0098791	Golgi apparatus subcompartment	17/257	303/9955	0.00219856	0.020186	0.0174491	Seita.1G300500/Seita.3G046000/Seita.3G158400/Seita.3G158500/Seita.3G217800/Seita.3G228400/Seita.4G185100/Seita.4G196400/Seita.4G237700/Seita.5G405000/Seita.5G437300/Seita.6G001600/Seita.7G203700/Seita.7G264400/Seita.8G018300/Seita.8G025000/Seita.8G045900	17
Stem.Cluster_D	CC	GO:0031226	intrinsic component of plasma membrane	18/257	331/9955	0.00231482	0.020186	0.0174491	Seita.1G092000/Seita.2G154700/Seita.2G250200/Seita.2G327700/Seita.2G412000/Seita.3G193100/Seita.3G225200/Seita.3G233000/Seita.4G006600/Seita.5G104100/Seita.5G403300/Seita.5G448400/Seita.8G025400/Seita.9G363400/Seita.9G486000/Seita.4G257500/Seita.5G043400/Seita.3G333100	18
Stem.Cluster_D	CC	GO:0035371	microtubule plus-end	3/257	11/9955	0.00240628	0.020186	0.0174491	Seita.4G085500/Seita.6G237500/Seita.7G183000	3
Stem.Cluster_D	CC	GO:1990752	microtubule end	3/257	12/9955	0.00314757	0.0250149	0.0216232	Seita.4G085500/Seita.6G237500/Seita.7G183000	3
Stem.Cluster_D	CC	GO:0046658	anchored component of plasma membrane	9/257	119/9955	0.00362153	0.0266374	0.0230257	Seita.1G092000/Seita.2G154700/Seita.2G250200/Seita.2G327700/Seita.2G412000/Seita.3G225200/Seita.5G448400/Seita.9G363400/Seita.9G486000	9
Stem.Cluster_D	CC	GO:0031225	anchored component of membrane	10/257	142/9955	0.00370454	0.0266374	0.0230257	Seita.1G092000/Seita.2G154700/Seita.2G250200/Seita.2G327700/Seita.2G412000/Seita.3G225200/Seita.5G448400/Seita.7G272500/Seita.9G363400/Seita.9G486000	10
Stem.Cluster_D	CC	GO:0009574	preprophase band	3/257	13/9955	0.0040144	0.0275534	0.0238175	Seita.2G031200/Seita.9G114600/Seita.9G475700	3
Stem.Cluster_E	BP	GO:0071554	cell wall organization or biogenesis	37/257	409/9983	1.72037e-11	1.98358e-08	1.94492e-08	Seita.1G079000/Seita.1G112800/Seita.1G116500/Seita.2G044900/Seita.2G347700/Seita.2G382900/Seita.2G404000/Seita.2G439200/Seita.3G347500/Seita.3G350800/Seita.4G259700/Seita.5G053000/Seita.5G246600/Seita.7G257800/Seita.8G100100/Seita.8G128800/Seita.9G037100/Seita.9G233400/Seita.9G287400/Seita.9G326300/Seita.9G326600/Seita.9G327100/Seita.9G441000/Seita.9G510500/Seita.9G573900/Seita.1G251900/Seita.3G1…	37
Stem.Cluster_E	BP	GO:0071555	cell wall organization	21/257	177/9983	4.74761e-09	2.737e-06	2.68365e-06	Seita.1G079000/Seita.1G112800/Seita.2G044900/Seita.2G404000/Seita.3G347500/Seita.4G259700/Seita.8G100100/Seita.8G128800/Seita.9G233400/Seita.9G287400/Seita.9G326300/Seita.9G326600/Seita.9G327100/Seita.9G441000/Seita.3G190400/Seita.5G046600/Seita.2G193300/Seita.2G282200/Seita.1G325200/Seita.5G153500/Seita.6G105300	21
Stem.Cluster_E	BP	GO:0045229	external encapsulating structure organization	22/257	209/9983	1.88991e-08	7.26356e-06	7.12199e-06	Seita.1G079000/Seita.1G112800/Seita.2G044900/Seita.2G404000/Seita.3G347500/Seita.4G259700/Seita.7G234500/Seita.8G100100/Seita.8G128800/Seita.9G233400/Seita.9G287400/Seita.9G326300/Seita.9G326600/Seita.9G327100/Seita.9G441000/Seita.3G190400/Seita.5G046600/Seita.2G193300/Seita.2G282200/Seita.1G325200/Seita.5G153500/Seita.6G105300	22
Stem.Cluster_E	BP	GO:0071669	plant-type cell wall organization or biogenesis	24/257	257/9983	4.34566e-08	1.25264e-05	1.22822e-05	Seita.1G079000/Seita.1G116500/Seita.2G044900/Seita.2G347700/Seita.2G382900/Seita.3G347500/Seita.3G350800/Seita.4G259700/Seita.8G100100/Seita.8G128800/Seita.9G287400/Seita.9G326300/Seita.9G326600/Seita.9G327100/Seita.9G441000/Seita.1G251900/Seita.3G190400/Seita.4G227100/Seita.5G046600/Seita.6G086100/Seita.7G181500/Seita.2G282200/Seita.1G325200/Seita.6G105300	24
Stem.Cluster_E	BP	GO:0009664	plant-type cell wall organization	16/257	125/9983	1.18455e-07	2.73158e-05	2.67834e-05	Seita.1G079000/Seita.2G044900/Seita.3G347500/Seita.4G259700/Seita.8G100100/Seita.8G128800/Seita.9G287400/Seita.9G326300/Seita.9G326600/Seita.9G327100/Seita.9G441000/Seita.3G190400/Seita.5G046600/Seita.2G282200/Seita.1G325200/Seita.6G105300	16
Stem.Cluster_E	BP	GO:0009765	photosynthesis, light harvesting	6/257	20/9983	7.85821e-06	0.00151009	0.00148065	Seita.2G351600/Seita.2G352900/Seita.3G143800/Seita.4G139900/Seita.8G080900/Seita.9G177100	6
Stem.Cluster_E	BP	GO:0010345	suberin biosynthetic process	6/257	32/9983	0.000141719	0.0233431	0.0228881	Seita.3G142500/Seita.3G218600/Seita.5G386300/Seita.8G128800/Seita.9G214500/Seita.2G132800	6
Stem.Cluster_E	BP	GO:0009269	response to desiccation	4/257	13/9983	0.000255407	0.0327205	0.0320827	Seita.1G079000/Seita.3G347500/Seita.4G259700/Seita.5G046600	4
Stem.Cluster_E	BP	GO:0046688	response to copper ion	4/257	13/9983	0.000255407	0.0327205	0.0320827	Seita.1G127700/Seita.5G365900/Seita.7G330200/Seita.8G018100	4
Stem.Cluster_E	CC	GO:0005618	cell wall	42/240	490/9955	3.78237e-13	2.7961e-11	2.60201e-11	Seita.1G079000/Seita.1G180600/Seita.1G295700/Seita.2G404000/Seita.2G439200/Seita.3G067600/Seita.3G101400/Seita.3G177600/Seita.3G263800/Seita.3G294700/Seita.3G347500/Seita.4G234100/Seita.4G259700/Seita.5G053000/Seita.5G263600/Seita.5G357900/Seita.5G454800/Seita.7G257800/Seita.8G100100/Seita.8G230000/Seita.9G287400/Seita.9G326300/Seita.9G326600/Seita.9G327100/Seita.2G188200/Seita.2G434300/Seita.3G0…	42
Stem.Cluster_E	CC	GO:0030312	external encapsulating structure	42/240	491/9955	4.05231e-13	2.7961e-11	2.60201e-11	Seita.1G079000/Seita.1G180600/Seita.1G295700/Seita.2G404000/Seita.2G439200/Seita.3G067600/Seita.3G101400/Seita.3G177600/Seita.3G263800/Seita.3G294700/Seita.3G347500/Seita.4G234100/Seita.4G259700/Seita.5G053000/Seita.5G263600/Seita.5G357900/Seita.5G454800/Seita.7G257800/Seita.8G100100/Seita.8G230000/Seita.9G287400/Seita.9G326300/Seita.9G326600/Seita.9G327100/Seita.2G188200/Seita.2G434300/Seita.3G0…	42
Stem.Cluster_E	CC	GO:0009505	plant-type cell wall	22/240	220/9955	1.45915e-08	6.7121e-07	6.24619e-07	Seita.1G079000/Seita.2G404000/Seita.2G439200/Seita.3G101400/Seita.3G294700/Seita.3G347500/Seita.4G259700/Seita.5G053000/Seita.5G263600/Seita.5G357900/Seita.5G454800/Seita.8G100100/Seita.8G230000/Seita.2G434300/Seita.3G190400/Seita.3G202900/Seita.4G169700/Seita.5G046600/Seita.7G079300/Seita.9G253700/Seita.5G153500/Seita.8G081300	22
Stem.Cluster_E	CC	GO:0046658	anchored component of plasma membrane	11/240	119/9955	0.000135412	0.00441003	0.00410392	Seita.1G127700/Seita.1G256300/Seita.2G044900/Seita.2G351200/Seita.3G263800/Seita.5G263600/Seita.8G079300/Seita.9G233400/Seita.9G479800/Seita.4G169700/Seita.5G357100	11
Stem.Cluster_E	CC	GO:0031225	anchored component of membrane	12/240	142/9955	0.000159784	0.00441003	0.00410392	Seita.1G127700/Seita.1G256300/Seita.2G044900/Seita.2G351200/Seita.3G263800/Seita.5G263600/Seita.8G079300/Seita.9G233400/Seita.9G479800/Seita.3G032700/Seita.4G169700/Seita.5G357100	12
Stem.Cluster_E	CC	GO:0005576	extracellular region	21/240	384/9955	0.000387222	0.00890611	0.00828791	Seita.1G295700/Seita.1G349200/Seita.2G044900/Seita.2G439200/Seita.3G067600/Seita.3G263800/Seita.4G082600/Seita.6G138200/Seita.7G257800/Seita.8G230000/Seita.2G188200/Seita.2G343000/Seita.3G032700/Seita.3G177700/Seita.5G467700/Seita.8G003100/Seita.7G255200/Seita.9G492500/Seita.6G105300/Seita.7G311600/Seita.8G081300	21
Stem.Cluster_E	CC	GO:0010287	plastoglobule	6/240	47/9955	0.000865501	0.0170627	0.0158784	Seita.2G351600/Seita.2G352900/Seita.3G143800/Seita.4G139900/Seita.8G080900/Seita.9G177100	6
Stem.Cluster_E	CC	GO:0031226	intrinsic component of plasma membrane	18/240	331/9955	0.00107698	0.0185779	0.0172884	Seita.1G020100/Seita.1G116500/Seita.1G127700/Seita.1G256300/Seita.2G044900/Seita.2G351200/Seita.3G263800/Seita.5G007400/Seita.5G079300/Seita.5G263600/Seita.8G079300/Seita.9G233400/Seita.9G479800/Seita.1G116600/Seita.4G169700/Seita.5G357100/Seita.6G214700/Seita.7G170200	18
Stem.Cluster_E	CC	GO:0048046	apoplast	13/240	226/9955	0.00324762	0.0497968	0.0463403	Seita.1G349200/Seita.2G044900/Seita.2G439200/Seita.3G263800/Seita.7G257800/Seita.8G230000/Seita.2G343000/Seita.3G032700/Seita.8G003100/Seita.9G492500/Seita.6G105300/Seita.7G311600/Seita.8G081300	13
Stem.Cluster_E	MF	GO:0016168	chlorophyll binding	6/227	15/8539	1.35311e-06	0.000415405	0.000380295	Seita.2G351600/Seita.2G352900/Seita.3G143800/Seita.4G139900/Seita.8G080900/Seita.9G177100	6
Stem.Cluster_E	MF	GO:0046906	tetrapyrrole binding	7/227	31/8539	1.30503e-05	0.00200322	0.00183391	Seita.2G351600/Seita.2G352900/Seita.3G143800/Seita.4G139900/Seita.7G132100/Seita.8G080900/Seita.9G177100	7
Stem.Cluster_E	MF	GO:0004601	peroxidase activity	7/227	42/8539	0.000104387	0.00748467	0.00685207	Seita.1G079000/Seita.3G347500/Seita.4G259700/Seita.5G053000/Seita.8G100100/Seita.3G190400/Seita.5G046600	7
Stem.Cluster_E	MF	GO:0004553	hydrolase activity, hydrolyzing O-glycosyl compounds	17/227	228/8539	0.000115956	0.00748467	0.00685207	Seita.2G044900/Seita.2G279000/Seita.2G439200/Seita.3G263800/Seita.4G234100/Seita.7G234500/Seita.7G257800/Seita.8G079300/Seita.8G230000/Seita.9G091600/Seita.9G479800/Seita.2G188200/Seita.4G169700/Seita.9G465800/Seita.2G193300/Seita.9G492500/Seita.8G081300	17
Stem.Cluster_E	MF	GO:0016684	oxidoreductase activity, acting on peroxide as acceptor	7/227	43/8539	0.0001219	0.00748467	0.00685207	Seita.1G079000/Seita.3G347500/Seita.4G259700/Seita.5G053000/Seita.8G100100/Seita.3G190400/Seita.5G046600	7
Stem.Cluster_E	MF	GO:0046556	alpha-L-arabinofuranosidase activity	4/227	13/8539	0.000287906	0.014606	0.0133715	Seita.2G439200/Seita.7G257800/Seita.8G230000/Seita.8G081300	4
Stem.Cluster_E	MF	GO:0016798	hydrolase activity, acting on glycosyl bonds	17/227	249/8539	0.000333035	0.014606	0.0133715	Seita.2G044900/Seita.2G279000/Seita.2G439200/Seita.3G263800/Seita.4G234100/Seita.7G234500/Seita.7G257800/Seita.8G079300/Seita.8G230000/Seita.9G091600/Seita.9G479800/Seita.2G188200/Seita.4G169700/Seita.9G465800/Seita.2G193300/Seita.9G492500/Seita.8G081300	17
Stem.Cluster_E	MF	GO:0070011	peptidase activity, acting on L-amino acid peptides	15/227	222/8539	0.000828791	0.0283565	0.0259598	Seita.1G295700/Seita.3G067600/Seita.3G120900/Seita.5G236800/Seita.5G303900/Seita.7G284200/Seita.9G377000/Seita.3G032700/Seita.3G177700/Seita.5G370200/Seita.5G467700/Seita.7G079300/Seita.8G003100/Seita.9G253700/Seita.7G311600	15
Stem.Cluster_E	MF	GO:0048037	cofactor binding	14/227	199/8539	0.000831298	0.0283565	0.0259598	Seita.3G084500/Seita.3G386300/Seita.5G456100/Seita.6G138200/Seita.2G351600/Seita.2G352900/Seita.3G143800/Seita.4G139900/Seita.6G087600/Seita.7G020900/Seita.7G132100/Seita.8G080900/Seita.9G177100/Seita.6G240000	14
Stem.Cluster_E	MF	GO:0008233	peptidase activity	15/227	232/8539	0.00129635	0.039798	0.0364343	Seita.1G295700/Seita.3G067600/Seita.3G120900/Seita.5G236800/Seita.5G303900/Seita.7G284200/Seita.9G377000/Seita.3G032700/Seita.3G177700/Seita.5G370200/Seita.5G467700/Seita.7G079300/Seita.8G003100/Seita.9G253700/Seita.7G311600	15
Stem.Cluster_F	BP	GO:0015979	photosynthesis	13/231	128/9983	7.82213e-06	0.00932398	0.00904074	Seita.1G208500/Seita.2G034400/Seita.2G046600/Seita.2G217800/Seita.3G203200/Seita.6G103300/Seita.7G171400/Seita.9G093400/Seita.2G109800/Seita.6G049900/Seita.7G257400/Seita.9G525700/Seita.4G099200	13
Stem.Cluster_F	BP	GO:0019684	photosynthesis, light reaction	10/231	91/9983	4.51377e-05	0.0269021	0.0260848	Seita.1G208500/Seita.2G046600/Seita.2G217800/Seita.3G203200/Seita.6G103300/Seita.7G171400/Seita.9G093400/Seita.2G109800/Seita.7G257400/Seita.4G099200	10
Stem.Cluster_F	CC	GO:0009579	thylakoid	23/227	359/9955	7.2178e-06	0.00115485	0.00111686	Seita.7G183200/Seita.1G053900/Seita.1G208500/Seita.1G323900/Seita.2G046600/Seita.2G217800/Seita.3G203200/Seita.4G148000/Seita.5G067400/Seita.5G099500/Seita.6G103300/Seita.6G128600/Seita.6G151500/Seita.7G171400/Seita.9G093400/Seita.2G109800/Seita.5G039100/Seita.6G251800/Seita.7G257400/Seita.7G261400/Seita.9G525700/Seita.9G541100/Seita.4G099200	23
Stem.Cluster_F	CC	GO:0009534	chloroplast thylakoid	17/227	293/9955	0.000383117	0.0238882	0.0231024	Seita.7G183200/Seita.1G208500/Seita.1G323900/Seita.2G046600/Seita.2G217800/Seita.5G099500/Seita.6G103300/Seita.6G151500/Seita.7G171400/Seita.9G093400/Seita.2G109800/Seita.5G039100/Seita.7G257400/Seita.7G261400/Seita.9G525700/Seita.9G541100/Seita.4G099200	17
Stem.Cluster_F	CC	GO:0031976	plastid thylakoid	17/227	297/9955	0.000447904	0.0238882	0.0231024	Seita.7G183200/Seita.1G208500/Seita.1G323900/Seita.2G046600/Seita.2G217800/Seita.5G099500/Seita.6G103300/Seita.6G151500/Seita.7G171400/Seita.9G093400/Seita.2G109800/Seita.5G039100/Seita.7G257400/Seita.7G261400/Seita.9G525700/Seita.9G541100/Seita.4G099200	17
Stem.Cluster_F	CC	GO:0009535	chloroplast thylakoid membrane	14/227	227/9955	0.000690424	0.0276169	0.0267085	Seita.7G183200/Seita.1G208500/Seita.1G323900/Seita.2G046600/Seita.2G217800/Seita.5G099500/Seita.6G103300/Seita.7G171400/Seita.2G109800/Seita.5G039100/Seita.7G257400/Seita.7G261400/Seita.9G525700/Seita.4G099200	14
Stem.Cluster_F	CC	GO:0055035	plastid thylakoid membrane	14/227	233/9955	0.000891464	0.0285269	0.0275885	Seita.7G183200/Seita.1G208500/Seita.1G323900/Seita.2G046600/Seita.2G217800/Seita.5G099500/Seita.6G103300/Seita.7G171400/Seita.2G109800/Seita.5G039100/Seita.7G257400/Seita.7G261400/Seita.9G525700/Seita.4G099200	14
Stem.Cluster_F	CC	GO:0034357	photosynthetic membrane	14/227	244/9955	0.00138901	0.0317489	0.0307045	Seita.7G183200/Seita.1G208500/Seita.1G323900/Seita.2G046600/Seita.2G217800/Seita.5G099500/Seita.6G103300/Seita.7G171400/Seita.2G109800/Seita.5G039100/Seita.7G257400/Seita.7G261400/Seita.9G525700/Seita.4G099200	14
Stem.Cluster_F	CC	GO:0042651	thylakoid membrane	14/227	244/9955	0.00138901	0.0317489	0.0307045	Seita.7G183200/Seita.1G208500/Seita.1G323900/Seita.2G046600/Seita.2G217800/Seita.5G099500/Seita.6G103300/Seita.7G171400/Seita.2G109800/Seita.5G039100/Seita.7G257400/Seita.7G261400/Seita.9G525700/Seita.4G099200	14
Stem.Cluster_F	CC	GO:0005777	peroxisome	11/227	179/9955	0.00262779	0.0467163	0.0451796	Seita.2G034400/Seita.3G270200/Seita.3G395300/Seita.5G253900/Seita.7G181000/Seita.7G242500/Seita.9G537200/Seita.9G552800/Seita.9G566700/Seita.4G111400/Seita.6G118900	11
Stem.Cluster_F	CC	GO:0042579	microbody	11/227	179/9955	0.00262779	0.0467163	0.0451796	Seita.2G034400/Seita.3G270200/Seita.3G395300/Seita.5G253900/Seita.7G181000/Seita.7G242500/Seita.9G537200/Seita.9G552800/Seita.9G566700/Seita.4G111400/Seita.6G118900	11
Leaf.Cluster_A	BP	GO:0009415	response to water	40/552	347/9983	7.35387e-06	0.0123569	0.0122667	Seita.1G267200/Seita.2G142500/Seita.2G252300/Seita.2G284000/Seita.3G144000/Seita.3G193800/Seita.4G082000/Seita.5G319100/Seita.5G393800/Seita.7G116800/Seita.7G184600/Seita.7G228200/Seita.8G008100/Seita.8G115400/Seita.8G125500/Seita.9G039200/Seita.9G198800/Seita.9G229700/Seita.9G410800/Seita.9G544600/Seita.1G331600/Seita.2G218400/Seita.2G404700/Seita.2G420700/Seita.2G436000/Seita.3G242400/Seita.7G2…	40
Leaf.Cluster_A	BP	GO:0009408	response to heat	27/552	199/9983	1.30278e-05	0.0123569	0.0122667	Seita.1G012200/Seita.1G342400/Seita.2G053300/Seita.2G053700/Seita.2G229700/Seita.5G093000/Seita.5G131300/Seita.5G164400/Seita.5G448900/Seita.7G116800/Seita.9G106800/Seita.9G460100/Seita.9G488400/Seita.3G153300/Seita.4G089700/Seita.5G137400/Seita.9G440100/Seita.1G177700/Seita.1G326600/Seita.2G241600/Seita.4G227700/Seita.5G092400/Seita.5G315500/Seita.5G450800/Seita.7G060200/Seita.9G424800/Seita.7G1…	27
Leaf.Cluster_A	BP	GO:0042542	response to hydrogen peroxide	15/552	85/9983	5.60988e-05	0.0272219	0.0270233	Seita.1G012200/Seita.1G209000/Seita.9G488400/Seita.1G117500/Seita.4G067200/Seita.5G427000/Seita.6G132800/Seita.8G053300/Seita.3G192300/Seita.5G092400/Seita.5G315500/Seita.8G019400/Seita.9G424800/Seita.2G179800/Seita.9G213200	15
Leaf.Cluster_A	BP	GO:0009414	response to water deprivation	37/552	340/9983	5.73999e-05	0.0272219	0.0270233	Seita.1G267200/Seita.2G142500/Seita.2G252300/Seita.2G284000/Seita.3G144000/Seita.3G193800/Seita.4G082000/Seita.5G319100/Seita.5G393800/Seita.7G116800/Seita.7G184600/Seita.7G228200/Seita.8G115400/Seita.8G125500/Seita.9G039200/Seita.9G198800/Seita.9G229700/Seita.9G410800/Seita.9G544600/Seita.1G331600/Seita.2G218400/Seita.2G404700/Seita.2G420700/Seita.3G242400/Seita.7G262800/Seita.1G161800/Seita.1G1…	37
Leaf.Cluster_B	BP	GO:0006855	drug transmembrane transport	16/321	115/9983	7.52347e-07	0.000667615	0.000639003	Seita.4G005300/Seita.5G047700/Seita.7G308000/Seita.9G311800/Seita.2G026700/Seita.9G512000/Seita.J005200/Seita.1G207000/Seita.1G270500/Seita.4G006600/Seita.4G183800/Seita.7G064200/Seita.9G018900/Seita.9G481000/Seita.9G523900/Seita.9G275000	16
Leaf.Cluster_B	BP	GO:0015893	drug transport	16/321	117/9983	9.53736e-07	0.000667615	0.000639003	Seita.4G005300/Seita.5G047700/Seita.7G308000/Seita.9G311800/Seita.2G026700/Seita.9G512000/Seita.J005200/Seita.1G207000/Seita.1G270500/Seita.4G006600/Seita.4G183800/Seita.7G064200/Seita.9G018900/Seita.9G481000/Seita.9G523900/Seita.9G275000	16
Leaf.Cluster_B	BP	GO:0015807	L-amino acid transport	8/321	29/9983	2.49117e-06	0.000871908	0.00083454	Seita.4G005300/Seita.4G083300/Seita.9G311800/Seita.2G026700/Seita.J005200/Seita.4G006600/Seita.9G277500/Seita.9G388900	8
Leaf.Cluster_B	BP	GO:1902475	L-alpha-amino acid transmembrane transport	8/321	29/9983	2.49117e-06	0.000871908	0.00083454	Seita.4G005300/Seita.4G083300/Seita.9G311800/Seita.2G026700/Seita.J005200/Seita.4G006600/Seita.9G277500/Seita.9G388900	8
Leaf.Cluster_B	BP	GO:0003333	amino acid transmembrane transport	11/321	64/9983	5.18784e-06	0.0012105	0.00115862	Seita.3G223500/Seita.4G005300/Seita.4G083300/Seita.5G387200/Seita.9G311800/Seita.2G026700/Seita.J005200/Seita.4G006600/Seita.8G036600/Seita.9G277500/Seita.9G388900	11
Leaf.Cluster_B	BP	GO:0006865	amino acid transport	11/321	64/9983	5.18784e-06	0.0012105	0.00115862	Seita.3G223500/Seita.4G005300/Seita.4G083300/Seita.5G387200/Seita.9G311800/Seita.2G026700/Seita.J005200/Seita.4G006600/Seita.8G036600/Seita.9G277500/Seita.9G388900	11
Leaf.Cluster_B	BP	GO:0019684	photosynthesis, light reaction	13/321	91/9983	6.16923e-06	0.00123385	0.00118097	Seita.2G248100/Seita.5G336700/Seita.6G082000/Seita.1G321900/Seita.5G348400/Seita.9G093400/Seita.1G208500/Seita.2G217800/Seita.7G171400/Seita.9G092700/Seita.9G342500/Seita.9G534200/Seita.5G348300	13
Leaf.Cluster_B	BP	GO:0016999	antibiotic metabolic process	13/321	95/9983	1.00027e-05	0.00175048	0.00167546	Seita.7G079000/Seita.8G002400/Seita.1G184000/Seita.2G389600/Seita.1G376400/Seita.2G196200/Seita.5G194600/Seita.5G442700/Seita.5G442800/Seita.5G443500/Seita.6G011800/Seita.6G012500/Seita.2G435800	13
Leaf.Cluster_B	BP	GO:0098656	anion transmembrane transport	23/321	265/9983	1.42109e-05	0.00184043	0.00176156	Seita.1G278500/Seita.2G352700/Seita.3G223500/Seita.3G283100/Seita.4G005300/Seita.4G083300/Seita.4G231500/Seita.5G298500/Seita.5G387200/Seita.9G311800/Seita.9G327900/Seita.2G026700/Seita.7G207100/Seita.9G506200/Seita.9G540800/Seita.J005200/Seita.1G270500/Seita.1G360400/Seita.3G283600/Seita.4G006600/Seita.8G036600/Seita.9G277500/Seita.9G388900	23
Leaf.Cluster_B	BP	GO:0009696	salicylic acid metabolic process	8/321	36/9983	1.44282e-05	0.00184043	0.00176156	Seita.8G002400/Seita.5G194600/Seita.5G442700/Seita.5G442800/Seita.5G443500/Seita.6G011800/Seita.6G012500/Seita.2G435800	8
Leaf.Cluster_B	BP	GO:0015979	photosynthesis	15/321	128/9983	1.44605e-05	0.00184043	0.00176156	Seita.2G248100/Seita.5G336700/Seita.6G082000/Seita.1G321900/Seita.2G389600/Seita.5G348400/Seita.9G093400/Seita.1G208500/Seita.2G051000/Seita.2G217800/Seita.7G171400/Seita.9G092700/Seita.9G342500/Seita.9G534200/Seita.5G348300	15
Leaf.Cluster_B	BP	GO:0009773	photosynthetic electron transport in photosystem I	5/321	12/9983	2.19104e-05	0.00255621	0.00244666	Seita.2G248100/Seita.1G321900/Seita.9G092700/Seita.9G342500/Seita.9G534200	5
Leaf.Cluster_B	BP	GO:0009767	photosynthetic electron transport chain	8/321	41/9983	3.95992e-05	0.00426453	0.00408177	Seita.2G248100/Seita.6G082000/Seita.1G321900/Seita.1G208500/Seita.7G171400/Seita.9G092700/Seita.9G342500/Seita.9G534200	8
Leaf.Cluster_B	BP	GO:1901657	glycosyl compound metabolic process	15/321	151/9983	0.000101225	0.0101225	0.00968863	Seita.5G035900/Seita.7G079000/Seita.6G243800/Seita.7G164500/Seita.9G125400/Seita.9G554000/Seita.2G375500/Seita.3G220200/Seita.3G270000/Seita.5G257200/Seita.5G272800/Seita.5G442700/Seita.5G442800/Seita.5G443500/Seita.9G474600	15
Leaf.Cluster_B	BP	GO:0010817	regulation of hormone levels	27/321	390/9983	0.000141495	0.012236	0.0117116	Seita.1G371900/Seita.3G223500/Seita.5G387200/Seita.8G002400/Seita.J003500/Seita.J031600/Seita.5G044400/Seita.5G050500/Seita.5G063800/Seita.6G089500/Seita.1G240800/Seita.1G345400/Seita.2G221700/Seita.3G048500/Seita.3G201400/Seita.4G048100/Seita.5G194600/Seita.5G257200/Seita.5G383700/Seita.5G442700/Seita.5G442800/Seita.5G443500/Seita.6G011800/Seita.6G012500/Seita.9G355300/Seita.9G500200/Seita.2G435…	27
Leaf.Cluster_B	BP	GO:0006820	anion transport	24/321	328/9983	0.000145033	0.012236	0.0117116	Seita.1G278500/Seita.2G352700/Seita.3G223500/Seita.3G283100/Seita.4G005300/Seita.4G083300/Seita.4G231500/Seita.5G298500/Seita.5G387200/Seita.9G311800/Seita.9G327900/Seita.2G026700/Seita.7G207100/Seita.9G506200/Seita.9G540800/Seita.J005200/Seita.1G270500/Seita.1G360400/Seita.3G283600/Seita.3G402300/Seita.4G006600/Seita.8G036600/Seita.9G277500/Seita.9G388900	24
Leaf.Cluster_B	BP	GO:0042445	hormone metabolic process	22/321	288/9983	0.00014858	0.012236	0.0117116	Seita.1G371900/Seita.8G002400/Seita.J003500/Seita.J031600/Seita.5G044400/Seita.5G050500/Seita.5G063800/Seita.6G089500/Seita.1G345400/Seita.3G048500/Seita.3G201400/Seita.5G194600/Seita.5G257200/Seita.5G383700/Seita.5G442700/Seita.5G442800/Seita.5G443500/Seita.6G011800/Seita.6G012500/Seita.9G355300/Seita.9G500200/Seita.2G435800	22
Leaf.Cluster_B	BP	GO:0018958	phenol-containing compound metabolic process	8/321	51/9983	0.000199529	0.015519	0.0148539	Seita.8G002400/Seita.5G194600/Seita.5G442700/Seita.5G442800/Seita.5G443500/Seita.6G011800/Seita.6G012500/Seita.2G435800	8
Leaf.Cluster_B	BP	GO:0042537	benzene-containing compound metabolic process	8/321	53/9983	0.000262655	0.0193535	0.0185241	Seita.8G002400/Seita.5G194600/Seita.5G442700/Seita.5G442800/Seita.5G443500/Seita.6G011800/Seita.6G012500/Seita.2G435800	8
Leaf.Cluster_B	BP	GO:1903825	organic acid transmembrane transport	13/321	133/9983	0.000342168	0.0228112	0.0218336	Seita.3G223500/Seita.4G005300/Seita.4G083300/Seita.4G231500/Seita.5G387200/Seita.9G311800/Seita.2G026700/Seita.J005200/Seita.1G270500/Seita.4G006600/Seita.8G036600/Seita.9G277500/Seita.9G388900	13
Leaf.Cluster_B	BP	GO:1905039	carboxylic acid transmembrane transport	13/321	133/9983	0.000342168	0.0228112	0.0218336	Seita.3G223500/Seita.4G005300/Seita.4G083300/Seita.4G231500/Seita.5G387200/Seita.9G311800/Seita.2G026700/Seita.J005200/Seita.1G270500/Seita.4G006600/Seita.8G036600/Seita.9G277500/Seita.9G388900	13
Leaf.Cluster_B	CC	GO:0009535	chloroplast thylakoid membrane	25/296	227/9955	1.44825e-08	1.7185e-06	1.60221e-06	Seita.2G248100/Seita.4G207000/Seita.5G336700/Seita.6G082000/Seita.1G321900/Seita.2G263700/Seita.2G310100/Seita.5G348400/Seita.9G450200/Seita.1G208500/Seita.1G341200/Seita.2G051000/Seita.2G217800/Seita.3G359500/Seita.5G460600/Seita.7G171400/Seita.9G121900/Seita.9G342500/Seita.9G344400/Seita.9G534200/Seita.1G322800/Seita.5G348300/Seita.6G049100/Seita.7G183200/Seita.9G187900	25
Leaf.Cluster_B	CC	GO:0055035	plastid thylakoid membrane	25/296	233/9955	2.455e-08	1.7185e-06	1.60221e-06	Seita.2G248100/Seita.4G207000/Seita.5G336700/Seita.6G082000/Seita.1G321900/Seita.2G263700/Seita.2G310100/Seita.5G348400/Seita.9G450200/Seita.1G208500/Seita.1G341200/Seita.2G051000/Seita.2G217800/Seita.3G359500/Seita.5G460600/Seita.7G171400/Seita.9G121900/Seita.9G342500/Seita.9G344400/Seita.9G534200/Seita.1G322800/Seita.5G348300/Seita.6G049100/Seita.7G183200/Seita.9G187900	25
Leaf.Cluster_B	CC	GO:0034357	photosynthetic membrane	25/296	244/9955	6.16139e-08	2.15649e-06	2.01056e-06	Seita.2G248100/Seita.4G207000/Seita.5G336700/Seita.6G082000/Seita.1G321900/Seita.2G263700/Seita.2G310100/Seita.5G348400/Seita.9G450200/Seita.1G208500/Seita.1G341200/Seita.2G051000/Seita.2G217800/Seita.3G359500/Seita.5G460600/Seita.7G171400/Seita.9G121900/Seita.9G342500/Seita.9G344400/Seita.9G534200/Seita.1G322800/Seita.5G348300/Seita.6G049100/Seita.7G183200/Seita.9G187900	25
Leaf.Cluster_B	CC	GO:0042651	thylakoid membrane	25/296	244/9955	6.16139e-08	2.15649e-06	2.01056e-06	Seita.2G248100/Seita.4G207000/Seita.5G336700/Seita.6G082000/Seita.1G321900/Seita.2G263700/Seita.2G310100/Seita.5G348400/Seita.9G450200/Seita.1G208500/Seita.1G341200/Seita.2G051000/Seita.2G217800/Seita.3G359500/Seita.5G460600/Seita.7G171400/Seita.9G121900/Seita.9G342500/Seita.9G344400/Seita.9G534200/Seita.1G322800/Seita.5G348300/Seita.6G049100/Seita.7G183200/Seita.9G187900	25
Leaf.Cluster_B	CC	GO:0009534	chloroplast thylakoid	27/296	293/9955	1.63025e-07	4.5647e-06	4.25581e-06	Seita.2G248100/Seita.4G207000/Seita.5G336700/Seita.6G082000/Seita.1G321900/Seita.2G263700/Seita.2G310100/Seita.5G348400/Seita.9G093400/Seita.9G441700/Seita.9G450200/Seita.1G208500/Seita.1G341200/Seita.2G051000/Seita.2G217800/Seita.3G359500/Seita.5G460600/Seita.7G171400/Seita.9G121900/Seita.9G342500/Seita.9G344400/Seita.9G534200/Seita.1G322800/Seita.5G348300/Seita.6G049100/Seita.7G183200/Seita.9G1…	27
Leaf.Cluster_B	CC	GO:0031976	plastid thylakoid	27/296	297/9955	2.14819e-07	5.01245e-06	4.67327e-06	Seita.2G248100/Seita.4G207000/Seita.5G336700/Seita.6G082000/Seita.1G321900/Seita.2G263700/Seita.2G310100/Seita.5G348400/Seita.9G093400/Seita.9G441700/Seita.9G450200/Seita.1G208500/Seita.1G341200/Seita.2G051000/Seita.2G217800/Seita.3G359500/Seita.5G460600/Seita.7G171400/Seita.9G121900/Seita.9G342500/Seita.9G344400/Seita.9G534200/Seita.1G322800/Seita.5G348300/Seita.6G049100/Seita.7G183200/Seita.9G1…	27
Leaf.Cluster_B	CC	GO:0009579	thylakoid	29/296	359/9955	9.08929e-07	1.81786e-05	1.69485e-05	Seita.2G248100/Seita.4G207000/Seita.5G336700/Seita.6G082000/Seita.1G321900/Seita.2G263700/Seita.2G310100/Seita.5G348400/Seita.9G093400/Seita.9G441700/Seita.9G450200/Seita.1G208500/Seita.1G341200/Seita.2G051000/Seita.2G217800/Seita.3G359500/Seita.5G460600/Seita.7G171400/Seita.9G121900/Seita.9G342500/Seita.9G344400/Seita.9G534200/Seita.1G322800/Seita.2G036900/Seita.5G348300/Seita.5G433600/Seita.6G0…	29
Leaf.Cluster_B	CC	GO:0005887	integral component of plasma membrane	19/296	211/9955	1.64184e-05	0.000287321	0.000267878	Seita.4G005300/Seita.4G083300/Seita.5G298500/Seita.7G194000/Seita.3G244500/Seita.3G319400/Seita.9G506200/Seita.9G540800/Seita.1G237300/Seita.2G211200/Seita.3G068600/Seita.3G073300/Seita.3G248900/Seita.4G006600/Seita.7G193900/Seita.9G277500/Seita.9G388900/Seita.5G007500/Seita.7G032900	19
Leaf.Cluster_B	CC	GO:0009941	chloroplast envelope	28/296	430/9955	7.85089e-05	0.00122125	0.00113861	Seita.2G248100/Seita.1G321900/Seita.2G263700/Seita.2G310100/Seita.9G441700/Seita.1G341200/Seita.2G051000/Seita.2G217800/Seita.3G051000/Seita.5G272800/Seita.5G279400/Seita.6G190000/Seita.9G188200/Seita.9G244200/Seita.9G342500/Seita.1G324700/Seita.4G218100/Seita.5G237100/Seita.5G270200/Seita.5G433600/Seita.7G289700/Seita.9G022000/Seita.9G039000/Seita.9G076300/Seita.9G181500/Seita.9G400600/Seita.9G5…	28
Leaf.Cluster_B	CC	GO:0031226	intrinsic component of plasma membrane	23/296	331/9955	0.000134326	0.00188057	0.00175331	Seita.4G005300/Seita.4G083300/Seita.5G298500/Seita.5G448000/Seita.6G202800/Seita.7G194000/Seita.2G380300/Seita.3G244500/Seita.3G319400/Seita.9G506200/Seita.9G540800/Seita.1G237300/Seita.2G211200/Seita.3G068600/Seita.3G073300/Seita.3G248900/Seita.4G006600/Seita.7G193900/Seita.9G150500/Seita.9G277500/Seita.9G388900/Seita.5G007500/Seita.7G032900	23
Leaf.Cluster_B	CC	GO:0009526	plastid envelope	28/296	451/9955	0.000176891	0.00225135	0.002099	Seita.2G248100/Seita.1G321900/Seita.2G263700/Seita.2G310100/Seita.9G441700/Seita.1G341200/Seita.2G051000/Seita.2G217800/Seita.3G051000/Seita.5G272800/Seita.5G279400/Seita.6G190000/Seita.9G188200/Seita.9G244200/Seita.9G342500/Seita.1G324700/Seita.4G218100/Seita.5G237100/Seita.5G270200/Seita.5G433600/Seita.7G289700/Seita.9G022000/Seita.9G039000/Seita.9G076300/Seita.9G181500/Seita.9G400600/Seita.9G5…	28
Leaf.Cluster_B	CC	GO:0010598	NAD(P)H dehydrogenase complex (plastoquinone)	4/296	12/9955	0.000313884	0.00366198	0.00341418	Seita.3G359500/Seita.5G460600/Seita.9G534200/Seita.7G183200	4
Leaf.Cluster_B	CC	GO:0008287	protein serine/threonine phosphatase complex	3/296	12/9955	0.0046895	0.046895	0.0437217	Seita.3G166700/Seita.1G130300/Seita.2G292900	3
Leaf.Cluster_B	CC	GO:1903293	phosphatase complex	3/296	12/9955	0.0046895	0.046895	0.0437217	Seita.3G166700/Seita.1G130300/Seita.2G292900	3
Leaf.Cluster_B	MF	GO:0015318	inorganic molecular entity transmembrane transporter activity	36/278	478/8539	1.82868e-06	0.000331868	0.000318837	Seita.1G278500/Seita.3G112800/Seita.3G223500/Seita.3G283100/Seita.4G005300/Seita.4G083300/Seita.4G231500/Seita.5G298500/Seita.5G387200/Seita.6G026600/Seita.7G194000/Seita.9G311800/Seita.9G327900/Seita.2G026700/Seita.3G006100/Seita.3G208000/Seita.7G207100/Seita.9G506200/Seita.9G540800/Seita.9G579300/Seita.J005200/Seita.1G141800/Seita.1G207000/Seita.1G270500/Seita.1G360400/Seita.3G073300/Seita.3G24…	36
Leaf.Cluster_B	MF	GO:0008509	anion transmembrane transporter activity	23/278	236/8539	2.35803e-06	0.000331868	0.000318837	Seita.1G278500/Seita.2G352700/Seita.3G223500/Seita.3G283100/Seita.4G005300/Seita.4G083300/Seita.4G231500/Seita.5G298500/Seita.5G387200/Seita.9G311800/Seita.9G327900/Seita.2G026700/Seita.7G207100/Seita.9G506200/Seita.9G540800/Seita.J005200/Seita.1G270500/Seita.1G360400/Seita.3G283600/Seita.4G006600/Seita.8G036600/Seita.9G277500/Seita.9G388900	23
Leaf.Cluster_B	MF	GO:0015179	L-amino acid transmembrane transporter activity	8/278	29/8539	2.70095e-06	0.000331868	0.000318837	Seita.4G005300/Seita.4G083300/Seita.9G311800/Seita.2G026700/Seita.J005200/Seita.4G006600/Seita.9G277500/Seita.9G388900	8
Leaf.Cluster_B	MF	GO:0015171	amino acid transmembrane transporter activity	11/278	61/8539	3.51183e-06	0.000331868	0.000318837	Seita.3G223500/Seita.4G005300/Seita.4G083300/Seita.5G387200/Seita.9G311800/Seita.2G026700/Seita.J005200/Seita.4G006600/Seita.8G036600/Seita.9G277500/Seita.9G388900	11
Leaf.Cluster_B	MF	GO:0015075	ion transmembrane transporter activity	35/278	488/8539	7.71468e-06	0.00058323	0.000560329	Seita.1G278500/Seita.2G352700/Seita.3G112800/Seita.3G223500/Seita.3G283100/Seita.4G005300/Seita.4G083300/Seita.4G231500/Seita.5G298500/Seita.5G387200/Seita.6G026600/Seita.7G194000/Seita.9G311800/Seita.9G327900/Seita.2G026700/Seita.3G006100/Seita.3G208000/Seita.7G207100/Seita.9G506200/Seita.9G540800/Seita.9G579300/Seita.J005200/Seita.1G141800/Seita.1G207000/Seita.1G237300/Seita.1G270500/Seita.1G36…	35
Leaf.Cluster_B	MF	GO:0080032	methyl jasmonate esterase activity	4/278	10/8539	0.000197715	0.012456	0.011967	Seita.5G442700/Seita.5G442800/Seita.5G443100/Seita.5G443500	4
Leaf.Cluster_B	MF	GO:0005342	organic acid transmembrane transporter activity	13/278	130/8539	0.000302109	0.0142747	0.0137142	Seita.3G223500/Seita.4G005300/Seita.4G083300/Seita.4G231500/Seita.5G387200/Seita.9G311800/Seita.2G026700/Seita.J005200/Seita.1G270500/Seita.4G006600/Seita.8G036600/Seita.9G277500/Seita.9G388900	13
Leaf.Cluster_B	MF	GO:0046943	carboxylic acid transmembrane transporter activity	13/278	130/8539	0.000302109	0.0142747	0.0137142	Seita.3G223500/Seita.4G005300/Seita.4G083300/Seita.4G231500/Seita.5G387200/Seita.9G311800/Seita.2G026700/Seita.J005200/Seita.1G270500/Seita.4G006600/Seita.8G036600/Seita.9G277500/Seita.9G388900	13
Leaf.Cluster_B	MF	GO:0015103	inorganic anion transmembrane transporter activity	9/278	76/8539	0.000760156	0.0319265	0.030673	Seita.1G278500/Seita.3G283100/Seita.5G298500/Seita.9G327900/Seita.7G207100/Seita.9G506200/Seita.9G540800/Seita.1G360400/Seita.3G283600	9
Leaf.Cluster_B	MF	GO:0008514	organic anion transmembrane transporter activity	14/278	168/8539	0.00113682	0.0429719	0.0412846	Seita.2G352700/Seita.3G223500/Seita.4G005300/Seita.4G083300/Seita.4G231500/Seita.5G387200/Seita.9G311800/Seita.2G026700/Seita.J005200/Seita.1G270500/Seita.4G006600/Seita.8G036600/Seita.9G277500/Seita.9G388900	14
Leaf.Cluster_C	BP	GO:0080167	response to karrikin	52/1773	136/9983	1.08903e-08	2.61693e-05	2.49559e-05	Seita.1G057300/Seita.1G115800/Seita.1G116100/Seita.4G043100/Seita.4G096400/Seita.7G168700/Seita.4G021300/Seita.9G064400/Seita.2G053300/Seita.2G053700/Seita.2G081000/Seita.3G406500/Seita.8G228200/Seita.5G465600/Seita.3G393100/Seita.9G379000/Seita.2G270400/Seita.3G049100/Seita.6G193700/Seita.1G253100/Seita.5G356600/Seita.5G356800/Seita.9G136100/Seita.J031500/Seita.3G103400/Seita.6G007700/Seita.7G02…	52
Leaf.Cluster_C	BP	GO:0009415	response to water	101/1773	347/9983	8.64442e-08	0.000103863	9.90468e-05	Seita.1G324300/Seita.2G035400/Seita.3G157100/Seita.3G162400/Seita.5G069100/Seita.5G166200/Seita.5G166300/Seita.5G351300/Seita.6G073100/Seita.6G114000/Seita.7G168700/Seita.8G115200/Seita.9G097300/Seita.3G282000/Seita.4G092200/Seita.7G127300/Seita.9G162900/Seita.9G191400/Seita.9G371700/Seita.2G164500/Seita.4G112000/Seita.4G112200/Seita.7G249900/Seita.9G064400/Seita.1G267200/Seita.2G142500/Seita.2G2…	101
Leaf.Cluster_C	BP	GO:0006979	response to oxidative stress	106/1773	380/9983	4.30287e-07	0.00034466	0.000328679	Seita.1G335200/Seita.2G219700/Seita.3G145000/Seita.3G175700/Seita.5G284300/Seita.5G342100/Seita.5G393400/Seita.5G456800/Seita.7G023900/Seita.7G098700/Seita.7G126300/Seita.7G168700/Seita.9G262500/Seita.9G381600/Seita.2G225400/Seita.2G225500/Seita.3G160800/Seita.4G284100/Seita.6G202900/Seita.9G475200/Seita.3G060800/Seita.4G021300/Seita.5G207000/Seita.5G356000/Seita.9G064400/Seita.1G012200/Seita.1G0…	106
Leaf.Cluster_C	BP	GO:0098656	anion transmembrane transport	79/1773	265/9983	7.88615e-07	0.000403888	0.000385161	Seita.1G115800/Seita.1G116100/Seita.1G218600/Seita.1G241300/Seita.1G268000/Seita.2G167400/Seita.3G150400/Seita.5G026800/Seita.5G469400/Seita.7G102400/Seita.7G125900/Seita.8G107500/Seita.5G295200/Seita.1G318800/Seita.2G090200/Seita.5G015100/Seita.7G249900/Seita.1G044800/Seita.1G218500/Seita.3G406500/Seita.7G122100/Seita.9G220000/Seita.9G431100/Seita.9G506300/Seita.1G001100/Seita.1G231800/Seita.5G1…	79
Leaf.Cluster_C	BP	GO:0009414	response to water deprivation	96/1773	340/9983	8.40383e-07	0.000403888	0.000385161	Seita.1G324300/Seita.2G035400/Seita.3G157100/Seita.3G162400/Seita.5G166200/Seita.5G166300/Seita.5G351300/Seita.6G073100/Seita.6G114000/Seita.7G168700/Seita.8G115200/Seita.9G097300/Seita.3G282000/Seita.4G092200/Seita.7G127300/Seita.9G162900/Seita.9G191400/Seita.9G371700/Seita.2G164500/Seita.4G112000/Seita.4G112200/Seita.7G249900/Seita.9G064400/Seita.1G267200/Seita.2G142500/Seita.2G252300/Seita.2G2…	96
Leaf.Cluster_C	BP	GO:0000302	response to reactive oxygen species	62/1773	197/9983	1.68458e-06	0.000674672	0.00064339	Seita.1G335200/Seita.2G219700/Seita.3G145000/Seita.3G175700/Seita.5G342100/Seita.5G456800/Seita.7G023900/Seita.7G126300/Seita.9G262500/Seita.2G225400/Seita.2G225500/Seita.6G202900/Seita.9G475200/Seita.3G060800/Seita.5G207000/Seita.5G356000/Seita.1G012200/Seita.1G209000/Seita.1G210300/Seita.5G414600/Seita.7G102200/Seita.7G220500/Seita.9G198800/Seita.9G460100/Seita.9G488400/Seita.1G117500/Seita.4G0…	62
Leaf.Cluster_C	BP	GO:0042542	response to hydrogen peroxide	33/1773	85/9983	3.48999e-06	0.00119806	0.00114251	Seita.3G145000/Seita.3G175700/Seita.5G342100/Seita.6G202900/Seita.9G475200/Seita.3G060800/Seita.5G207000/Seita.1G012200/Seita.1G209000/Seita.9G488400/Seita.1G117500/Seita.4G067200/Seita.5G427000/Seita.6G132800/Seita.8G053300/Seita.3G192300/Seita.5G092400/Seita.5G315500/Seita.8G019400/Seita.9G424800/Seita.2G179800/Seita.9G213200/Seita.5G249900/Seita.5G384200/Seita.7G124900/Seita.9G028500/Seita.8G0…	33
Leaf.Cluster_C	BP	GO:0006820	anion transport	90/1773	328/9983	6.70313e-06	0.00201345	0.00192009	Seita.1G115800/Seita.1G116100/Seita.1G218600/Seita.1G241300/Seita.1G257200/Seita.1G268000/Seita.1G275700/Seita.2G167400/Seita.3G150400/Seita.5G026800/Seita.5G469400/Seita.7G102400/Seita.7G125900/Seita.8G107500/Seita.5G295200/Seita.1G318800/Seita.2G090200/Seita.5G015100/Seita.7G249900/Seita.9G443400/Seita.1G044800/Seita.1G218500/Seita.3G406500/Seita.7G122100/Seita.7G205800/Seita.9G220000/Seita.9G4…	90
Leaf.Cluster_C	BP	GO:0006855	drug transmembrane transport	40/1773	115/9983	8.39247e-06	0.00224079	0.00213689	Seita.2G001400/Seita.2G108400/Seita.5G015100/Seita.1G044800/Seita.3G357700/Seita.5G333100/Seita.9G275500/Seita.6G186100/Seita.7G039700/Seita.7G039900/Seita.4G145400/Seita.7G040200/Seita.4G273500/Seita.5G274000/Seita.7G064100/Seita.9G011600/Seita.4G005300/Seita.5G047700/Seita.7G308000/Seita.9G311800/Seita.2G026700/Seita.9G512000/Seita.J005200/Seita.1G207000/Seita.1G270500/Seita.4G006600/Seita.4G18…	40
Leaf.Cluster_C	BP	GO:0015698	inorganic anion transport	35/1773	96/9983	9.3717e-06	0.00225202	0.0021476	Seita.1G115800/Seita.1G116100/Seita.1G218600/Seita.1G257200/Seita.1G275700/Seita.3G150400/Seita.5G295200/Seita.1G318800/Seita.1G218500/Seita.3G406500/Seita.7G205800/Seita.9G506300/Seita.1G231800/Seita.5G198500/Seita.8G106000/Seita.2G302200/Seita.9G532700/Seita.7G213800/Seita.4G032500/Seita.9G136100/Seita.J031500/Seita.2G228300/Seita.1G278500/Seita.3G283100/Seita.5G298500/Seita.9G327900/Seita.7G20…	35
Leaf.Cluster_C	BP	GO:0009409	response to cold	98/1773	368/9983	1.05031e-05	0.00229444	0.00218805	Seita.1G275700/Seita.1G324300/Seita.2G156300/Seita.3G162400/Seita.4G048300/Seita.5G166200/Seita.5G166300/Seita.5G469400/Seita.6G114000/Seita.8G115200/Seita.3G282000/Seita.4G092200/Seita.5G295200/Seita.9G371700/Seita.2G164500/Seita.4G021300/Seita.4G225400/Seita.6G128600/Seita.9G064400/Seita.2G248500/Seita.1G127200/Seita.1G267200/Seita.2G053300/Seita.2G053700/Seita.2G142500/Seita.3G095700/Seita.3G1…	98
Leaf.Cluster_C	BP	GO:0042445	hormone metabolic process	80/1773	288/9983	1.33276e-05	0.00248516	0.00236993	Seita.1G335200/Seita.4G224700/Seita.5G069100/Seita.5G123900/Seita.5G337500/Seita.6G073100/Seita.7G135700/Seita.7G168700/Seita.7G171000/Seita.7G171100/Seita.7G212900/Seita.J029400/Seita.2G105100/Seita.2G225400/Seita.2G225500/Seita.3G116300/Seita.5G208900/Seita.7G050500/Seita.9G480100/Seita.3G147000/Seita.5G447700/Seita.1G118400/Seita.1G366300/Seita.4G289300/Seita.8G008100/Seita.9G061200/Seita.2G43…	80
Leaf.Cluster_C	BP	GO:0015893	drug transport	40/1773	117/9983	1.34445e-05	0.00248516	0.00236993	Seita.2G001400/Seita.2G108400/Seita.5G015100/Seita.1G044800/Seita.3G357700/Seita.5G333100/Seita.9G275500/Seita.6G186100/Seita.7G039700/Seita.7G039900/Seita.4G145400/Seita.7G040200/Seita.4G273500/Seita.5G274000/Seita.7G064100/Seita.9G011600/Seita.4G005300/Seita.5G047700/Seita.7G308000/Seita.9G311800/Seita.2G026700/Seita.9G512000/Seita.J005200/Seita.1G207000/Seita.1G270500/Seita.4G006600/Seita.4G18…	40
Leaf.Cluster_C	BP	GO:1905623	positive regulation of leaf development	15/1773	29/9983	3.28959e-05	0.00564635	0.00538454	Seita.3G104000/Seita.4G226200/Seita.5G126200/Seita.5G284300/Seita.9G097300/Seita.3G160800/Seita.9G162900/Seita.1G209000/Seita.2G436400/Seita.1G252000/Seita.9G521900/Seita.7G124900/Seita.5G389500/Seita.9G417900/Seita.7G182000	15
Leaf.Cluster_C	BP	GO:0009636	response to toxic substance	69/1773	252/9983	8.38668e-05	0.0134355	0.0128125	Seita.1G002000/Seita.1G380000/Seita.2G001400/Seita.3G145000/Seita.3G175700/Seita.5G342100/Seita.7G023900/Seita.7G167900/Seita.9G262500/Seita.6G202900/Seita.9G475200/Seita.3G060800/Seita.5G207000/Seita.9G064400/Seita.5G015400/Seita.1G012200/Seita.1G209000/Seita.1G239600/Seita.5G346500/Seita.7G102200/Seita.7G122100/Seita.8G153700/Seita.9G370000/Seita.9G488400/Seita.1G117500/Seita.1G358900/Seita.4G0…	69
Leaf.Cluster_C	BP	GO:0009408	response to heat	57/1773	199/9983	9.1422e-05	0.0137304	0.0130938	Seita.1G324300/Seita.3G175700/Seita.5G403700/Seita.9G543300/Seita.2G038000/Seita.3G282000/Seita.5G328200/Seita.7G050500/Seita.5G207000/Seita.1G012200/Seita.1G342400/Seita.2G053300/Seita.2G053700/Seita.2G229700/Seita.5G093000/Seita.5G131300/Seita.5G164400/Seita.5G448900/Seita.7G116800/Seita.9G106800/Seita.9G460100/Seita.9G488400/Seita.3G153300/Seita.4G089700/Seita.5G137400/Seita.9G440100/Seita.1G1…	57
Leaf.Cluster_C	BP	GO:1900057	positive regulation of leaf senescence	14/1773	28/9983	9.76992e-05	0.0138101	0.0131697	Seita.3G104000/Seita.4G226200/Seita.5G126200/Seita.5G284300/Seita.9G097300/Seita.3G160800/Seita.9G162900/Seita.1G209000/Seita.2G436400/Seita.1G252000/Seita.9G521900/Seita.7G124900/Seita.9G417900/Seita.7G182000	14
Leaf.Cluster_C	BP	GO:0010150	leaf senescence	50/1773	171/9983	0.000138546	0.0167106	0.0159358	Seita.3G104000/Seita.4G226200/Seita.5G069100/Seita.5G126200/Seita.5G284300/Seita.5G468100/Seita.6G073100/Seita.9G097300/Seita.9G352400/Seita.9G506400/Seita.2G072400/Seita.3G160800/Seita.6G202900/Seita.9G162900/Seita.2G309200/Seita.1G209000/Seita.1G362600/Seita.3G008300/Seita.8G008100/Seita.9G198800/Seita.2G436000/Seita.2G436400/Seita.3G120900/Seita.4G067200/Seita.6G132800/Seita.1G252000/Seita.4G0…	50
Leaf.Cluster_C	BP	GO:0003333	amino acid transmembrane transport	24/1773	64/9983	0.000139081	0.0167106	0.0159358	Seita.1G268000/Seita.5G026800/Seita.5G469400/Seita.7G102400/Seita.7G125900/Seita.8G107500/Seita.2G090200/Seita.5G015100/Seita.9G431100/Seita.1G001100/Seita.3G323900/Seita.3G223500/Seita.4G005300/Seita.4G083300/Seita.5G387200/Seita.9G311800/Seita.2G026700/Seita.J005200/Seita.4G006600/Seita.8G036600/Seita.9G277500/Seita.9G388900/Seita.5G127600/Seita.3G064700	24
Leaf.Cluster_C	BP	GO:0006865	amino acid transport	24/1773	64/9983	0.000139081	0.0167106	0.0159358	Seita.1G268000/Seita.5G026800/Seita.5G469400/Seita.7G102400/Seita.7G125900/Seita.8G107500/Seita.2G090200/Seita.5G015100/Seita.9G431100/Seita.1G001100/Seita.3G323900/Seita.3G223500/Seita.4G005300/Seita.4G083300/Seita.5G387200/Seita.9G311800/Seita.2G026700/Seita.J005200/Seita.4G006600/Seita.8G036600/Seita.9G277500/Seita.9G388900/Seita.5G127600/Seita.3G064700	24
Leaf.Cluster_C	BP	GO:0009644	response to high light intensity	28/1773	80/9983	0.000162006	0.0185381	0.0176785	Seita.3G130700/Seita.3G175700/Seita.5G014300/Seita.9G272800/Seita.2G164500/Seita.5G207000/Seita.1G012200/Seita.1G123800/Seita.2G053300/Seita.2G053700/Seita.4G099200/Seita.9G488400/Seita.2G420700/Seita.7G257400/Seita.1G257600/Seita.5G092400/Seita.5G315500/Seita.9G424800/Seita.9G320700/Seita.6G082000/Seita.9G149700/Seita.1G206500/Seita.2G046600/Seita.2G053800/Seita.6G163000/Seita.7G113700/Seita.9G4…	28
Leaf.Cluster_C	BP	GO:0010200	response to chitin	34/1773	105/9983	0.000195812	0.0199962	0.019069	Seita.1G275700/Seita.1G179600/Seita.3G282000/Seita.3G062400/Seita.5G207000/Seita.2G351400/Seita.5G001000/Seita.4G067200/Seita.5G137400/Seita.6G132800/Seita.1G257600/Seita.3G205500/Seita.2G179800/Seita.3G287100/Seita.7G213800/Seita.6G193700/Seita.1G253100/Seita.2G206000/Seita.3G143400/Seita.4G197100/Seita.4G235200/Seita.5G208300/Seita.5G249900/Seita.5G363900/Seita.5G389300/Seita.8G152800/Seita.9G3…	34
Leaf.Cluster_C	BP	GO:0010817	regulation of hormone levels	97/1773	390/9983	0.000200454	0.0199962	0.019069	Seita.1G075600/Seita.1G335200/Seita.4G224700/Seita.5G069100/Seita.5G123900/Seita.5G337500/Seita.6G073100/Seita.7G135700/Seita.7G168700/Seita.7G171000/Seita.7G171100/Seita.7G212900/Seita.J029400/Seita.1G317400/Seita.2G105100/Seita.2G225400/Seita.2G225500/Seita.2G264800/Seita.3G116300/Seita.5G208900/Seita.7G050500/Seita.9G480100/Seita.3G147000/Seita.5G447700/Seita.1G063600/Seita.1G118400/Seita.1G36…	97
Leaf.Cluster_C	BP	GO:0055076	transition metal ion homeostasis	28/1773	81/9983	0.000206256	0.0199962	0.019069	Seita.5G342100/Seita.2G309200/Seita.2G159000/Seita.4G269800/Seita.8G019400/Seita.4G263200/Seita.5G085100/Seita.8G180600/Seita.2G090300/Seita.1G274100/Seita.4G175000/Seita.5G270400/Seita.7G081900/Seita.3G006100/Seita.1G141800/Seita.3G051000/Seita.4G183800/Seita.9G355300/Seita.9G481000/Seita.9G537500/Seita.1G206500/Seita.9G558000/Seita.2G153300/Seita.3G335000/Seita.4G002600/Seita.7G075500/Seita.9G0…	28
Leaf.Cluster_C	BP	GO:0090693	plant organ senescence	51/1773	178/9983	0.000208034	0.0199962	0.019069	Seita.3G104000/Seita.4G226200/Seita.5G069100/Seita.5G126200/Seita.5G284300/Seita.5G468100/Seita.6G073100/Seita.9G097300/Seita.9G352400/Seita.9G506400/Seita.2G072400/Seita.3G160800/Seita.6G202900/Seita.9G162900/Seita.2G309200/Seita.1G209000/Seita.1G362600/Seita.3G008300/Seita.8G008100/Seita.9G198800/Seita.2G436000/Seita.2G436400/Seita.3G120900/Seita.4G067200/Seita.6G132800/Seita.1G252000/Seita.4G0…	51
Leaf.Cluster_C	BP	GO:0009845	seed germination	50/1773	176/9983	0.000298683	0.0268877	0.025641	Seita.1G335200/Seita.2G156300/Seita.2G302100/Seita.4G143700/Seita.5G351300/Seita.6G123500/Seita.7G212900/Seita.2G225400/Seita.2G225500/Seita.5G295200/Seita.6G123200/Seita.7G050500/Seita.8G118200/Seita.3G010200/Seita.7G058100/Seita.1G209000/Seita.2G053300/Seita.2G053700/Seita.2G193000/Seita.3G139000/Seita.3G193800/Seita.3G402100/Seita.4G159500/Seita.5G164400/Seita.9G012400/Seita.9G460200/Seita.2G1…	50
Leaf.Cluster_C	BP	GO:1900055	regulation of leaf senescence	19/1773	48/9983	0.000302109	0.0268877	0.025641	Seita.3G104000/Seita.4G226200/Seita.5G126200/Seita.5G284300/Seita.9G097300/Seita.2G072400/Seita.3G160800/Seita.9G162900/Seita.1G209000/Seita.2G436400/Seita.1G252000/Seita.9G048700/Seita.3G287100/Seita.9G521900/Seita.4G105900/Seita.4G106300/Seita.7G124900/Seita.9G417900/Seita.7G182000	19
Leaf.Cluster_C	BP	GO:0007623	circadian rhythm	36/1773	116/9983	0.000330071	0.0283271	0.0270137	Seita.1G301300/Seita.4G048300/Seita.5G468100/Seita.7G212900/Seita.7G322900/Seita.9G392800/Seita.2G175000/Seita.2G253700/Seita.5G235900/Seita.9G198800/Seita.1G117500/Seita.8G029000/Seita.9G520700/Seita.7G035500/Seita.1G236100/Seita.4G097900/Seita.6G205100/Seita.1G376200/Seita.5G067800/Seita.7G334300/Seita.8G001400/Seita.1G346600/Seita.1G206500/Seita.3G158600/Seita.4G288100/Seita.1G043800/Seita.4G2…	36
Leaf.Cluster_C	BP	GO:0048511	rhythmic process	36/1773	117/9983	0.000396748	0.0317873	0.0303134	Seita.1G301300/Seita.4G048300/Seita.5G468100/Seita.7G212900/Seita.7G322900/Seita.9G392800/Seita.2G175000/Seita.2G253700/Seita.5G235900/Seita.9G198800/Seita.1G117500/Seita.8G029000/Seita.9G520700/Seita.7G035500/Seita.1G236100/Seita.4G097900/Seita.6G205100/Seita.1G376200/Seita.5G067800/Seita.7G334300/Seita.8G001400/Seita.1G346600/Seita.1G206500/Seita.3G158600/Seita.4G288100/Seita.1G043800/Seita.4G2…	36
Leaf.Cluster_C	BP	GO:0007568	aging	56/1773	205/9983	0.000402626	0.0317873	0.0303134	Seita.3G104000/Seita.4G226200/Seita.5G069100/Seita.5G126200/Seita.5G284300/Seita.5G468100/Seita.6G073100/Seita.9G097300/Seita.9G352400/Seita.9G506400/Seita.2G072400/Seita.3G160800/Seita.4G284100/Seita.6G202900/Seita.9G162900/Seita.2G309200/Seita.1G209000/Seita.1G362600/Seita.3G008300/Seita.8G008100/Seita.9G198800/Seita.2G436000/Seita.2G436400/Seita.3G120900/Seita.4G067200/Seita.4G238400/Seita.6G1…	56
Leaf.Cluster_C	BP	GO:1900140	regulation of seedling development	28/1773	84/9983	0.000410073	0.0317873	0.0303134	Seita.1G335200/Seita.2G302100/Seita.4G143700/Seita.5G351300/Seita.2G225400/Seita.2G225500/Seita.5G295200/Seita.8G118200/Seita.3G010200/Seita.4G279000/Seita.1G209000/Seita.2G053300/Seita.2G053700/Seita.2G193000/Seita.3G139000/Seita.3G193800/Seita.4G238400/Seita.6G144900/Seita.1G252000/Seita.4G097900/Seita.5G389300/Seita.7G124900/Seita.7G182000/Seita.1G201000/Seita.2G053800/Seita.4G234800/Seita.9G2…	28
Leaf.Cluster_C	BP	GO:0090351	seedling development	51/1773	183/9983	0.00043136	0.0320259	0.030541	Seita.1G335200/Seita.2G156300/Seita.2G302100/Seita.4G143700/Seita.5G351300/Seita.6G123500/Seita.7G212900/Seita.2G225400/Seita.2G225500/Seita.5G295200/Seita.6G123200/Seita.7G050500/Seita.8G118200/Seita.3G010200/Seita.4G279000/Seita.7G058100/Seita.1G209000/Seita.2G053300/Seita.2G053700/Seita.2G193000/Seita.3G139000/Seita.3G193800/Seita.3G402100/Seita.4G159500/Seita.5G164400/Seita.9G012400/Seita.9G4…	51
Leaf.Cluster_C	BP	GO:0046835	carbohydrate phosphorylation	13/1773	28/9983	0.000439807	0.0320259	0.030541	Seita.3G109600/Seita.4G101200/Seita.5G134800/Seita.7G132000/Seita.7G230800/Seita.1G090800/Seita.9G023300/Seita.3G402400/Seita.4G240700/Seita.6G090000/Seita.3G111200/Seita.5G313600/Seita.5G447800	13
Leaf.Cluster_C	BP	GO:0046677	response to antibiotic	76/1773	299/9983	0.000481961	0.0340633	0.0324839	Seita.1G250600/Seita.2G089100/Seita.3G145000/Seita.3G175700/Seita.5G342100/Seita.5G456800/Seita.6G254500/Seita.7G167900/Seita.7G212900/Seita.9G037500/Seita.9G506400/Seita.1G312200/Seita.6G202900/Seita.9G475200/Seita.3G060800/Seita.3G062400/Seita.5G207000/Seita.1G012200/Seita.1G209000/Seita.1G239600/Seita.7G220500/Seita.9G460100/Seita.9G488400/Seita.1G117500/Seita.1G358900/Seita.3G120900/Seita.4G0…	76
Leaf.Cluster_C	BP	GO:0046283	anthocyanin-containing compound metabolic process	23/1773	65/9983	0.000507235	0.0342592	0.0326707	Seita.4G043100/Seita.4G096400/Seita.6G073100/Seita.6G159400/Seita.3G242400/Seita.9G073800/Seita.2G270400/Seita.3G185800/Seita.5G412600/Seita.4G097900/Seita.5G356600/Seita.5G356800/Seita.7G079000/Seita.2G202100/Seita.3G270000/Seita.3G402300/Seita.1G057100/Seita.9G308700/Seita.1G043800/Seita.3G055700/Seita.4G224000/Seita.6G118900/Seita.1G117200	23
Leaf.Cluster_C	BP	GO:0009642	response to light intensity	38/1773	127/9983	0.000513246	0.0342592	0.0326707	Seita.3G130700/Seita.3G175700/Seita.5G014300/Seita.9G272800/Seita.2G164500/Seita.5G207000/Seita.1G012200/Seita.1G123800/Seita.2G053300/Seita.2G053700/Seita.4G099200/Seita.7G220500/Seita.7G280800/Seita.9G488400/Seita.2G420700/Seita.7G257400/Seita.1G257600/Seita.5G092400/Seita.5G315500/Seita.9G424800/Seita.9G113600/Seita.9G320700/Seita.6G082000/Seita.9G481000/Seita.9G149700/Seita.1G206500/Seita.2G0…	38
Leaf.Cluster_C	BP	GO:0046886	positive regulation of hormone biosynthetic process	8/1773	13/9983	0.000536779	0.0348616	0.0332452	Seita.5G069100/Seita.7G050500/Seita.8G008100/Seita.2G436000/Seita.5G231200/Seita.9G417600/Seita.1G345400/Seita.3G048500	8
Leaf.Cluster_C	BP	GO:0006721	terpenoid metabolic process	45/1773	159/9983	0.00063954	0.0395407	0.0377073	Seita.1G102500/Seita.2G035400/Seita.3G015800/Seita.7G135700/Seita.7G171000/Seita.7G171100/Seita.9G210000/Seita.9G559200/Seita.J004000/Seita.J029400/Seita.2G105100/Seita.2G303000/Seita.7G050500/Seita.8G069000/Seita.1G118400/Seita.1G123800/Seita.5G087500/Seita.5G166000/Seita.6G208200/Seita.7G116800/Seita.9G061200/Seita.4G015700/Seita.8G068800/Seita.9G061600/Seita.2G000900/Seita.8G232500/Seita.1G288…	45
Leaf.Cluster_C	BP	GO:0010029	regulation of seed germination	27/1773	82/9983	0.000641735	0.0395407	0.0377073	Seita.1G335200/Seita.2G302100/Seita.4G143700/Seita.5G351300/Seita.2G225400/Seita.2G225500/Seita.5G295200/Seita.8G118200/Seita.3G010200/Seita.1G209000/Seita.2G053300/Seita.2G053700/Seita.2G193000/Seita.3G139000/Seita.3G193800/Seita.4G238400/Seita.6G144900/Seita.1G252000/Seita.4G097900/Seita.5G389300/Seita.7G124900/Seita.7G182000/Seita.1G201000/Seita.2G053800/Seita.4G234800/Seita.9G289600/Seita.9G4…	27
Leaf.Cluster_C	BP	GO:1901615	organic hydroxy compound metabolic process	70/1773	275/9983	0.000758623	0.0455743	0.0434611	Seita.1G102500/Seita.2G035400/Seita.3G015800/Seita.4G043100/Seita.4G224700/Seita.5G123900/Seita.5G377200/Seita.7G168700/Seita.9G210000/Seita.2G105100/Seita.3G116300/Seita.9G480100/Seita.2G079200/Seita.1G118400/Seita.1G123800/Seita.1G362600/Seita.2G262300/Seita.4G289300/Seita.5G087500/Seita.5G166000/Seita.6G036000/Seita.6G208200/Seita.7G116800/Seita.7G199400/Seita.9G061200/Seita.7G286000/Seita.8G0…	70
Leaf.Cluster_C	BP	GO:0055072	iron ion homeostasis	14/1773	33/9983	0.000823229	0.0482492	0.046012	Seita.5G342100/Seita.2G309200/Seita.4G269800/Seita.8G019400/Seita.8G180600/Seita.3G006100/Seita.3G051000/Seita.4G183800/Seita.9G355300/Seita.9G481000/Seita.1G206500/Seita.2G153300/Seita.3G335000/Seita.4G002600	14
Leaf.Cluster_C	CC	GO:0031226	intrinsic component of plasma membrane	94/1711	331/9955	1.77138e-07	5.81013e-05	5.72436e-05	Seita.1G135500/Seita.1G135700/Seita.1G159600/Seita.2G292400/Seita.5G218600/Seita.5G263600/Seita.5G357100/Seita.6G003500/Seita.6G113100/Seita.7G102400/Seita.9G060800/Seita.9G112400/Seita.J002600/Seita.1G144500/Seita.2G220700/Seita.2G412000/Seita.5G328200/Seita.8G118200/Seita.9G569000/Seita.1G318800/Seita.1G372300/Seita.3G182000/Seita.7G099100/Seita.9G508700/Seita.6G224400/Seita.2G199500/Seita.2G29…	94
Leaf.Cluster_C	CC	GO:0009941	chloroplast envelope	106/1711	430/9955	3.84379e-05	0.00472621	0.00465644	Seita.2G108400/Seita.3G175700/Seita.4G210300/Seita.5G026800/Seita.5G469400/Seita.6G113700/Seita.7G030800/Seita.9G543300/Seita.2G325800/Seita.4G018500/Seita.5G295200/Seita.9G535600/Seita.5G356000/Seita.6G128600/Seita.2G166700/Seita.9G046900/Seita.1G123800/Seita.1G272900/Seita.2G151800/Seita.3G144000/Seita.4G099200/Seita.5G087500/Seita.5G240100/Seita.5G246700/Seita.6G036000/Seita.7G116800/Seita.9G1…	106
Leaf.Cluster_C	CC	GO:0034357	photosynthetic membrane	66/1711	244/9955	6.40916e-05	0.00472621	0.00465644	Seita.1G102500/Seita.2G035400/Seita.8G161700/Seita.2G164500/Seita.7G249900/Seita.2G166700/Seita.2G053300/Seita.2G053700/Seita.2G236000/Seita.2G285600/Seita.3G144000/Seita.3G224900/Seita.4G099200/Seita.5G240100/Seita.5G271900/Seita.7G102200/Seita.4G182300/Seita.7G257400/Seita.7G178000/Seita.8G019400/Seita.5G128000/Seita.6G103300/Seita.9G045100/Seita.1G317800/Seita.5G067800/Seita.5G438900/Seita.9G4…	66
Leaf.Cluster_C	CC	GO:0042651	thylakoid membrane	66/1711	244/9955	6.40916e-05	0.00472621	0.00465644	Seita.1G102500/Seita.2G035400/Seita.8G161700/Seita.2G164500/Seita.7G249900/Seita.2G166700/Seita.2G053300/Seita.2G053700/Seita.2G236000/Seita.2G285600/Seita.3G144000/Seita.3G224900/Seita.4G099200/Seita.5G240100/Seita.5G271900/Seita.7G102200/Seita.4G182300/Seita.7G257400/Seita.7G178000/Seita.8G019400/Seita.5G128000/Seita.6G103300/Seita.9G045100/Seita.1G317800/Seita.5G067800/Seita.5G438900/Seita.9G4…	66
Leaf.Cluster_C	CC	GO:0009526	plastid envelope	109/1711	451/9955	7.20459e-05	0.00472621	0.00465644	Seita.1G265600/Seita.2G108400/Seita.3G175700/Seita.4G210300/Seita.5G026800/Seita.5G469400/Seita.6G113700/Seita.7G030800/Seita.9G543300/Seita.2G325800/Seita.4G018500/Seita.5G295200/Seita.9G535600/Seita.2G164500/Seita.5G356000/Seita.6G128600/Seita.2G166700/Seita.9G046900/Seita.1G123800/Seita.1G272900/Seita.2G151800/Seita.3G144000/Seita.4G099200/Seita.5G087500/Seita.5G240100/Seita.5G246700/Seita.6G0…	109
Leaf.Cluster_C	CC	GO:0005887	integral component of plasma membrane	58/1711	211/9955	0.000108421	0.00592703	0.00583953	Seita.1G135500/Seita.1G135700/Seita.5G218600/Seita.7G102400/Seita.1G144500/Seita.2G220700/Seita.8G118200/Seita.1G318800/Seita.1G372300/Seita.2G291500/Seita.5G096100/Seita.7G033300/Seita.7G199400/Seita.7G228200/Seita.9G410000/Seita.9G506300/Seita.6G012100/Seita.6G022400/Seita.9G085500/Seita.2G123300/Seita.9G532700/Seita.3G082100/Seita.2G123200/Seita.8G085300/Seita.9G238400/Seita.1G025100/Seita.4G0…	58
Leaf.Cluster_C	CC	GO:0009535	chloroplast thylakoid membrane	61/1711	227/9955	0.000146143	0.00635923	0.00626535	Seita.1G102500/Seita.2G035400/Seita.8G161700/Seita.2G164500/Seita.7G249900/Seita.2G166700/Seita.2G053300/Seita.2G053700/Seita.2G236000/Seita.3G144000/Seita.4G099200/Seita.5G240100/Seita.5G271900/Seita.7G102200/Seita.7G257400/Seita.7G178000/Seita.8G019400/Seita.5G128000/Seita.6G103300/Seita.9G045100/Seita.1G317800/Seita.5G067800/Seita.5G438900/Seita.9G449200/Seita.2G248100/Seita.4G207000/Seita.5G3…	61
Leaf.Cluster_C	CC	GO:0031225	anchored component of membrane	42/1711	142/9955	0.000169348	0.00635923	0.00626535	Seita.1G159600/Seita.2G292400/Seita.5G263600/Seita.5G357100/Seita.6G003500/Seita.6G113100/Seita.9G060800/Seita.9G112400/Seita.J002600/Seita.2G412000/Seita.5G328200/Seita.9G569000/Seita.3G182000/Seita.7G099100/Seita.9G508700/Seita.6G224400/Seita.2G199500/Seita.3G008300/Seita.3G102200/Seita.3G315000/Seita.5G122100/Seita.5G448500/Seita.9G145500/Seita.9G373900/Seita.9G118600/Seita.1G322500/Seita.3G37…	42
Leaf.Cluster_C	CC	GO:0055035	plastid thylakoid membrane	62/1711	233/9955	0.000174491	0.00635923	0.00626535	Seita.1G102500/Seita.2G035400/Seita.8G161700/Seita.2G164500/Seita.7G249900/Seita.2G166700/Seita.2G053300/Seita.2G053700/Seita.2G236000/Seita.2G285600/Seita.3G144000/Seita.4G099200/Seita.5G240100/Seita.5G271900/Seita.7G102200/Seita.7G257400/Seita.7G178000/Seita.8G019400/Seita.5G128000/Seita.6G103300/Seita.9G045100/Seita.1G317800/Seita.5G067800/Seita.5G438900/Seita.9G449200/Seita.2G248100/Seita.4G2…	62
Leaf.Cluster_C	CC	GO:0031976	plastid thylakoid	75/1711	297/9955	0.000234197	0.00763167	0.00751901	Seita.1G102500/Seita.2G035400/Seita.8G161700/Seita.2G164500/Seita.7G249900/Seita.2G166700/Seita.1G123800/Seita.2G053300/Seita.2G053700/Seita.2G236000/Seita.2G285600/Seita.3G144000/Seita.3G224900/Seita.4G099200/Seita.5G240100/Seita.5G271900/Seita.7G102200/Seita.4G182300/Seita.7G257400/Seita.7G178000/Seita.8G019400/Seita.6G151500/Seita.5G128000/Seita.6G103300/Seita.9G045100/Seita.1G317800/Seita.5G0…	75
Leaf.Cluster_C	CC	GO:0009534	chloroplast thylakoid	74/1711	293/9955	0.00025594	0.00763167	0.00751901	Seita.1G102500/Seita.2G035400/Seita.8G161700/Seita.2G164500/Seita.7G249900/Seita.2G166700/Seita.1G123800/Seita.2G053300/Seita.2G053700/Seita.2G236000/Seita.3G144000/Seita.3G224900/Seita.4G099200/Seita.5G240100/Seita.5G271900/Seita.7G102200/Seita.4G182300/Seita.7G257400/Seita.7G178000/Seita.8G019400/Seita.6G151500/Seita.5G128000/Seita.6G103300/Seita.9G045100/Seita.1G317800/Seita.5G067800/Seita.5G4…	74
Leaf.Cluster_C	CC	GO:0046658	anchored component of plasma membrane	36/1711	119/9955	0.000297218	0.00812395	0.00800402	Seita.1G159600/Seita.2G292400/Seita.5G263600/Seita.5G357100/Seita.6G003500/Seita.6G113100/Seita.9G060800/Seita.9G112400/Seita.J002600/Seita.2G412000/Seita.5G328200/Seita.9G569000/Seita.3G182000/Seita.7G099100/Seita.9G508700/Seita.6G224400/Seita.2G199500/Seita.3G008300/Seita.3G315000/Seita.5G448500/Seita.9G145500/Seita.9G373900/Seita.9G118600/Seita.1G322500/Seita.3G371700/Seita.4G084200/Seita.8G07…	36
Leaf.Cluster_C	CC	GO:0009579	thylakoid	87/1711	359/9955	0.000344834	0.00870042	0.00857198	Seita.1G102500/Seita.1G324300/Seita.2G035400/Seita.4G210300/Seita.6G113700/Seita.8G161700/Seita.2G164500/Seita.5G442500/Seita.6G128600/Seita.7G249900/Seita.2G166700/Seita.1G123800/Seita.1G364200/Seita.2G053300/Seita.2G053700/Seita.2G236000/Seita.2G285600/Seita.3G144000/Seita.3G224900/Seita.4G099200/Seita.5G240100/Seita.5G271900/Seita.7G102200/Seita.4G182300/Seita.7G257400/Seita.7G178000/Seita.8G0…	87
Leaf.Cluster_C	MF	GO:0015318	inorganic molecular entity transmembrane transporter activity	125/1565	478/8539	8.27728e-06	0.00485876	0.00455686	Seita.1G115800/Seita.1G116100/Seita.1G218600/Seita.1G268000/Seita.2G167400/Seita.4G209800/Seita.5G024400/Seita.5G026800/Seita.5G439500/Seita.5G469400/Seita.7G102400/Seita.7G125900/Seita.8G005600/Seita.8G107500/Seita.9G272300/Seita.2G032600/Seita.2G090600/Seita.5G295200/Seita.8G118200/Seita.1G318800/Seita.1G372300/Seita.2G090200/Seita.4G195900/Seita.5G015100/Seita.1G019500/Seita.1G218500/Seita.2G2…	125
Leaf.Cluster_C	MF	GO:0008509	anion transmembrane transporter activity	68/1565	236/8539	4.42746e-05	0.0129946	0.0121872	Seita.1G115800/Seita.1G116100/Seita.1G218600/Seita.1G241300/Seita.1G268000/Seita.2G167400/Seita.5G026800/Seita.5G469400/Seita.7G102400/Seita.7G125900/Seita.8G107500/Seita.5G295200/Seita.1G318800/Seita.2G090200/Seita.5G015100/Seita.7G249900/Seita.1G044800/Seita.1G218500/Seita.3G406500/Seita.9G220000/Seita.9G431100/Seita.9G506300/Seita.1G001100/Seita.1G231800/Seita.5G198500/Seita.8G106000/Seita.2G3…	68
Leaf.Cluster_C	MF	GO:0015171	amino acid transmembrane transporter activity	24/1565	61/8539	9.48958e-05	0.018568	0.0174142	Seita.1G268000/Seita.5G026800/Seita.5G469400/Seita.7G102400/Seita.7G125900/Seita.8G107500/Seita.2G090200/Seita.5G015100/Seita.9G431100/Seita.1G001100/Seita.3G323900/Seita.3G223500/Seita.4G005300/Seita.4G083300/Seita.5G387200/Seita.9G311800/Seita.2G026700/Seita.J005200/Seita.4G006600/Seita.8G036600/Seita.9G277500/Seita.9G388900/Seita.5G127600/Seita.3G064700	24
Leaf.Cluster_C	MF	GO:0015103	inorganic anion transmembrane transporter activity	27/1565	76/8539	0.00026867	0.0394273	0.0369775	Seita.1G115800/Seita.1G116100/Seita.1G218600/Seita.5G295200/Seita.1G318800/Seita.1G218500/Seita.3G406500/Seita.9G506300/Seita.1G231800/Seita.5G198500/Seita.8G106000/Seita.2G302200/Seita.9G532700/Seita.4G032500/Seita.9G136100/Seita.J031500/Seita.2G228300/Seita.1G278500/Seita.3G283100/Seita.5G298500/Seita.9G327900/Seita.7G207100/Seita.9G506200/Seita.9G540800/Seita.1G360400/Seita.3G283600/Seita.5G32…	27
Leaf.Cluster_C	MF	GO:0015075	ion transmembrane transporter activity	119/1565	488/8539	0.000346833	0.0407181	0.0381881	Seita.1G115800/Seita.1G116100/Seita.1G218600/Seita.1G241300/Seita.1G268000/Seita.2G167400/Seita.4G209800/Seita.5G024400/Seita.5G026800/Seita.5G439500/Seita.5G469400/Seita.7G102400/Seita.7G125900/Seita.8G005600/Seita.8G107500/Seita.9G272300/Seita.2G032600/Seita.2G090600/Seita.5G295200/Seita.8G118200/Seita.1G318800/Seita.2G090200/Seita.4G195900/Seita.5G015100/Seita.7G249900/Seita.1G019500/Seita.1G0…	119
Leaf.Cluster_D	BP	GO:0080167	response to karrikin	16/240	136/9983	1.51651e-07	0.000196388	0.000181821	Seita.1G057100/Seita.2G053800/Seita.2G335600/Seita.9G023200/Seita.1G043800/Seita.1G225000/Seita.4G046700/Seita.4G224000/Seita.6G118900/Seita.7G090200/Seita.7G301600/Seita.8G013300/Seita.9G034700/Seita.4G276400/Seita.8G020600/Seita.3G108800	16
Leaf.Cluster_D	BP	GO:0007623	circadian rhythm	14/240	116/9983	6.75944e-07	0.000324442	0.000300377	Seita.1G206500/Seita.3G158600/Seita.4G288100/Seita.1G043800/Seita.4G224000/Seita.4G234800/Seita.6G055700/Seita.6G163400/Seita.7G046200/Seita.7G318100/Seita.1G062400/Seita.1G117200/Seita.1G298100/Seita.9G425300	14
Leaf.Cluster_D	BP	GO:0048511	rhythmic process	14/240	117/9983	7.51603e-07	0.000324442	0.000300377	Seita.1G206500/Seita.3G158600/Seita.4G288100/Seita.1G043800/Seita.4G224000/Seita.4G234800/Seita.6G055700/Seita.6G163400/Seita.7G046200/Seita.7G318100/Seita.1G062400/Seita.1G117200/Seita.1G298100/Seita.9G425300	14
Leaf.Cluster_D	BP	GO:0009812	flavonoid metabolic process	13/240	113/9983	2.94875e-06	0.000954658	0.00088385	Seita.1G057100/Seita.9G308700/Seita.1G043800/Seita.3G055700/Seita.4G224000/Seita.6G118900/Seita.7G301600/Seita.8G013300/Seita.9G034700/Seita.1G117200/Seita.5G025200/Seita.9G432200/Seita.3G108800	13
Leaf.Cluster_D	BP	GO:0009642	response to light intensity	13/240	127/9983	1.08442e-05	0.00280865	0.00260033	Seita.1G206500/Seita.2G046600/Seita.2G053800/Seita.2G335600/Seita.3G158600/Seita.3G390600/Seita.6G163000/Seita.7G113700/Seita.9G039700/Seita.9G457400/Seita.1G117200/Seita.4G110900/Seita.9G508400	13
Leaf.Cluster_D	BP	GO:0042440	pigment metabolic process	15/240	172/9983	1.62342e-05	0.00313997	0.00290708	Seita.1G057100/Seita.2G053800/Seita.5G365700/Seita.9G308700/Seita.1G043800/Seita.3G055700/Seita.3G245500/Seita.4G224000/Seita.4G234800/Seita.4G271200/Seita.6G094800/Seita.6G118900/Seita.1G117200/Seita.5G025200/Seita.9G432200	15
Leaf.Cluster_D	BP	GO:0071483	cellular response to blue light	6/240	24/9983	1.69728e-05	0.00313997	0.00290708	Seita.2G053800/Seita.3G126900/Seita.9G504100/Seita.1G067400/Seita.2G284200/Seita.7G046200	6
Leaf.Cluster_D	BP	GO:0071482	cellular response to light stimulus	10/240	91/9983	6.233e-05	0.0100897	0.00934129	Seita.2G053800/Seita.3G126900/Seita.9G504100/Seita.1G043800/Seita.1G067400/Seita.2G284200/Seita.3G055700/Seita.4G224000/Seita.7G046200/Seita.7G088700	10
Leaf.Cluster_D	BP	GO:0009658	chloroplast organization	13/240	158/9983	0.000109096	0.0156976	0.0145333	Seita.3G126900/Seita.5G279700/Seita.7G212200/Seita.8G173800/Seita.9G504100/Seita.1G067400/Seita.2G153300/Seita.3G390600/Seita.4G077400/Seita.4G234800/Seita.7G046200/Seita.1G117200/Seita.7G182600	13
Leaf.Cluster_D	BP	GO:0071478	cellular response to radiation	10/240	102/9983	0.000164016	0.0212401	0.0196646	Seita.2G053800/Seita.3G126900/Seita.9G504100/Seita.1G043800/Seita.1G067400/Seita.2G284200/Seita.3G055700/Seita.4G224000/Seita.7G046200/Seita.7G088700	10
Leaf.Cluster_D	BP	GO:0010224	response to UV-B	8/240	69/9983	0.000234278	0.0275809	0.0255352	Seita.1G057100/Seita.2G053800/Seita.1G043800/Seita.4G224000/Seita.1G117200/Seita.5G025200/Seita.9G115500/Seita.9G432200	8
Leaf.Cluster_D	BP	GO:0009640	photomorphogenesis	8/240	72/9983	0.000315242	0.0323151	0.0299182	Seita.1G043800/Seita.1G067400/Seita.1G225000/Seita.2G284200/Seita.3G055700/Seita.4G224000/Seita.1G117200/Seita.1G305900	8
Leaf.Cluster_D	BP	GO:0006979	response to oxidative stress	21/240	380/9983	0.000324398	0.0323151	0.0299182	Seita.1G206500/Seita.2G444000/Seita.5G328300/Seita.6G072900/Seita.8G173800/Seita.1G203000/Seita.2G153300/Seita.5G119800/Seita.5G306400/Seita.5G411200/Seita.7G113700/Seita.8G222300/Seita.8G238500/Seita.4G111400/Seita.4G194200/Seita.4G222300/Seita.7G084700/Seita.8G045700/Seita.9G115500/Seita.9G425300/Seita.9G508400	21
Leaf.Cluster_D	BP	GO:0042752	regulation of circadian rhythm	6/240	40/9983	0.000350813	0.0324502	0.0300433	Seita.1G043800/Seita.4G224000/Seita.6G055700/Seita.6G163400/Seita.1G062400/Seita.1G117200	6
Leaf.Cluster_D	BP	GO:0009904	chloroplast accumulation movement	4/240	16/9983	0.000472152	0.0407625	0.037739	Seita.5G279700/Seita.9G504100/Seita.4G077400/Seita.7G046200	4
Leaf.Cluster_D	CC	GO:0009534	chloroplast thylakoid	19/238	293/9955	7.53774e-05	0.00663745	0.00598867	Seita.2G029500/Seita.2G046600/Seita.2G053800/Seita.5G240000/Seita.7G278200/Seita.8G173800/Seita.2G153300/Seita.2G299200/Seita.2G394800/Seita.3G390600/Seita.4G046700/Seita.5G291800/Seita.5G395300/Seita.6G094800/Seita.6G109600/Seita.7G113700/Seita.7G229800/Seita.9G426900/Seita.1G305900	19
Leaf.Cluster_D	CC	GO:0031976	plastid thylakoid	19/238	297/9955	9.03054e-05	0.00663745	0.00598867	Seita.2G029500/Seita.2G046600/Seita.2G053800/Seita.5G240000/Seita.7G278200/Seita.8G173800/Seita.2G153300/Seita.2G299200/Seita.2G394800/Seita.3G390600/Seita.4G046700/Seita.5G291800/Seita.5G395300/Seita.6G094800/Seita.6G109600/Seita.7G113700/Seita.7G229800/Seita.9G426900/Seita.1G305900	19
Leaf.Cluster_D	CC	GO:0009579	thylakoid	21/238	359/9955	0.000137757	0.0067501	0.00609031	Seita.2G029500/Seita.2G046600/Seita.2G053800/Seita.3G158600/Seita.5G240000/Seita.7G278200/Seita.8G173800/Seita.2G153300/Seita.2G299200/Seita.2G394800/Seita.3G390600/Seita.4G046700/Seita.5G291800/Seita.5G395300/Seita.6G094800/Seita.6G109600/Seita.7G113700/Seita.7G229800/Seita.9G426900/Seita.1G305900/Seita.7G084700	21
Leaf.Cluster_D	CC	GO:0009941	chloroplast envelope	22/238	430/9955	0.000622356	0.0228716	0.020636	Seita.1G206500/Seita.2G029500/Seita.2G046600/Seita.2G401000/Seita.3G102000/Seita.5G240000/Seita.6G072900/Seita.8G173800/Seita.3G064700/Seita.3G335000/Seita.4G046700/Seita.4G077400/Seita.4G181500/Seita.5G291800/Seita.6G109600/Seita.6G163000/Seita.7G094100/Seita.7G229800/Seita.8G237500/Seita.9G039700/Seita.9G046700/Seita.7G182600	22
Leaf.Cluster_D	CC	GO:0009526	plastid envelope	22/238	451/9955	0.00116552	0.0342663	0.030917	Seita.1G206500/Seita.2G029500/Seita.2G046600/Seita.2G401000/Seita.3G102000/Seita.5G240000/Seita.6G072900/Seita.8G173800/Seita.3G064700/Seita.3G335000/Seita.4G046700/Seita.4G077400/Seita.4G181500/Seita.5G291800/Seita.6G109600/Seita.6G163000/Seita.7G094100/Seita.7G229800/Seita.8G237500/Seita.9G039700/Seita.9G046700/Seita.7G182600	22
Leaf.Cluster_D	CC	GO:0034357	photosynthetic membrane	14/238	244/9955	0.00216525	0.0454702	0.0410257	Seita.2G029500/Seita.2G046600/Seita.2G053800/Seita.3G158600/Seita.5G240000/Seita.8G173800/Seita.2G153300/Seita.2G299200/Seita.3G390600/Seita.4G046700/Seita.5G395300/Seita.6G109600/Seita.9G426900/Seita.1G305900	14
Leaf.Cluster_D	CC	GO:0042651	thylakoid membrane	14/238	244/9955	0.00216525	0.0454702	0.0410257	Seita.2G029500/Seita.2G046600/Seita.2G053800/Seita.3G158600/Seita.5G240000/Seita.8G173800/Seita.2G153300/Seita.2G299200/Seita.3G390600/Seita.4G046700/Seita.5G395300/Seita.6G109600/Seita.9G426900/Seita.1G305900	14
Leaf.Cluster_D	MF	GO:0016872	intramolecular lyase activity	5/210	10/8539	1.95557e-06	0.000553428	0.000522859	Seita.7G301600/Seita.8G013300/Seita.9G034700/Seita.9G508400/Seita.3G108800	5
Leaf.Cluster_E	CC	GO:0046658	anchored component of plasma membrane	16/372	119/9955	8.36622e-06	0.00153938	0.00150592	Seita.1G159600/Seita.2G292400/Seita.5G263600/Seita.5G357100/Seita.6G003500/Seita.6G113100/Seita.9G060800/Seita.9G112400/Seita.J002600/Seita.2G412000/Seita.5G328200/Seita.9G569000/Seita.3G182000/Seita.7G099100/Seita.9G508700/Seita.6G224400	16
Leaf.Cluster_E	CC	GO:0031225	anchored component of membrane	16/372	142/9955	7.71493e-05	0.00709774	0.00694344	Seita.1G159600/Seita.2G292400/Seita.5G263600/Seita.5G357100/Seita.6G003500/Seita.6G113100/Seita.9G060800/Seita.9G112400/Seita.J002600/Seita.2G412000/Seita.5G328200/Seita.9G569000/Seita.3G182000/Seita.7G099100/Seita.9G508700/Seita.6G224400	16
Leaf.Cluster_E	CC	GO:0005618	cell wall	35/372	490/9955	0.000165445	0.00791751	0.00774539	Seita.1G335200/Seita.1G380000/Seita.2G003000/Seita.2G218700/Seita.4G210300/Seita.5G062400/Seita.5G263600/Seita.5G377200/Seita.6G113100/Seita.6G159400/Seita.7G126300/Seita.9G186600/Seita.9G208200/Seita.9G253700/Seita.9G381600/Seita.9G519500/Seita.9G519600/Seita.9G528700/Seita.9G553900/Seita.1G033600/Seita.1G317400/Seita.2G225400/Seita.2G225500/Seita.3G071300/Seita.3G072000/Seita.3G162800/Seita.5G2…	35
Leaf.Cluster_E	CC	GO:0030312	external encapsulating structure	35/372	491/9955	0.00017212	0.00791751	0.00774539	Seita.1G335200/Seita.1G380000/Seita.2G003000/Seita.2G218700/Seita.4G210300/Seita.5G062400/Seita.5G263600/Seita.5G377200/Seita.6G113100/Seita.6G159400/Seita.7G126300/Seita.9G186600/Seita.9G208200/Seita.9G253700/Seita.9G381600/Seita.9G519500/Seita.9G519600/Seita.9G528700/Seita.9G553900/Seita.1G033600/Seita.1G317400/Seita.2G225400/Seita.2G225500/Seita.3G071300/Seita.3G072000/Seita.3G162800/Seita.5G2…	35
Leaf.Cluster_E	CC	GO:0031226	intrinsic component of plasma membrane	25/372	331/9955	0.000643201	0.0236698	0.0231553	Seita.1G135500/Seita.1G135700/Seita.1G159600/Seita.2G292400/Seita.5G218600/Seita.5G263600/Seita.5G357100/Seita.6G003500/Seita.6G113100/Seita.7G102400/Seita.9G060800/Seita.9G112400/Seita.J002600/Seita.1G144500/Seita.2G220700/Seita.2G412000/Seita.5G328200/Seita.8G118200/Seita.9G569000/Seita.1G318800/Seita.1G372300/Seita.3G182000/Seita.7G099100/Seita.9G508700/Seita.6G224400	25
Leaf.Cluster_E	CC	GO:0005576	extracellular region	27/372	384/9955	0.00117339	0.0359841	0.0352018	Seita.1G002800/Seita.1G324300/Seita.2G003000/Seita.2G156300/Seita.2G182700/Seita.3G130700/Seita.3G356500/Seita.4G191200/Seita.4G245500/Seita.5G014300/Seita.5G329900/Seita.5G337500/Seita.5G377200/Seita.6G159400/Seita.9G060800/Seita.9G208200/Seita.9G381600/Seita.1G116400/Seita.2G220600/Seita.9G276200/Seita.9G492500/Seita.9G569000/Seita.3G010200/Seita.3G060800/Seita.6G128600/Seita.9G064400/Seita.9G5…	27
Leaf.Cluster_E	MF	GO:0005507	copper ion binding	15/341	90/8539	2.31081e-06	0.00085269	0.00082946	Seita.1G335200/Seita.5G166200/Seita.5G166300/Seita.5G377200/Seita.6G113700/Seita.8G115200/Seita.9G262500/Seita.9G506400/Seita.9G543300/Seita.1G349900/Seita.2G225400/Seita.2G225500/Seita.6G250100/Seita.9G513600/Seita.3G060800	15
Leaf.Cluster_F	BP	GO:0010200	response to chitin	14/270	105/9983	8.11949e-07	0.00104092	0.00100254	Seita.3G287100/Seita.7G213800/Seita.6G193700/Seita.1G253100/Seita.2G206000/Seita.3G143400/Seita.4G197100/Seita.4G235200/Seita.5G208300/Seita.5G249900/Seita.5G363900/Seita.5G389300/Seita.8G152800/Seita.9G320700	14
