# Supplementary material for: Response of Multiple Tissues to Drought Revealed by a Weighted Gene Co-Expression Network Analysis in Foxtail Millet [Setaria italica (L.) P. Beauv.]
Source: Front Plant Sci. 2022 Jan 12;12:746166. doi: 10.3389/fpls.2021.746166 (PMC8790073; doi:10.3389/fpls.2021.746166)
Supplement: Supplementary Table S11 — Results of WGCNA and KIM of all genes in each module. [file Table_11.XLSX]

## Sheet: Supplementary Table S11
Supplementary Table S11: Results of WGCNA and KIM of all gene in each module
GeneID	Colour	HubGene	kTotal	kWithin	Best-hit-arabi-name	arabi-symbol	arabi-defline	Best-hit-rice-name	rice-symbol	rice-defline
Seita.9G478400	black	yes	1543.31	1	AT3G52590.1	EMB2167,ERD16,HAP4,UBQ1	ubiquitin extension protein 1	LOC_Os09g39500.1	--	ubiquitin fusion protein, putative, expressed
Seita.3G217000	black	yes	1629.07	0.990741	AT3G53740.3	--	Ribosomal protein L36e family protein	LOC_Os01g62350.1	--	60S ribosomal protein L36-2, putative, expressed
Seita.9G438600	black	yes	1599.77	0.985785	AT4G14320.1	--	Zinc-binding ribosomal protein family protein	LOC_Os07g33997.1	--	60S ribosomal protein L44, putative, expressed
Seita.3G162800	black	yes	1626.75	0.981258	AT2G19730.1	--	Ribosomal L28e protein family	LOC_Os02g57540.1	--	60S ribosomal protein L28-1, putative, expressed
Seita.4G260200	black	yes	1606.67	0.981209	AT3G52580.1	--	Ribosomal protein S11 family protein	LOC_Os02g06700.2	--	ribosomal protein, putative, expressed
Seita.5G119300	black	yes	1512.7	0.980221	AT1G27400.1	--	Ribosomal protein L22p/L17e family protein	LOC_Os09g08430.1	--	ribosomal protein L22, putative, expressed
Seita.7G078800	black	yes	1585.7	0.962794	AT2G37190.1	--	Ribosomal protein L11 family protein	LOC_Os04g50990.1	--	L11 domain containing ribosomal protein, putative, expressed
Seita.9G053600	black	yes	1651.25	0.962531	AT5G09500.1	--	Ribosomal protein S19 family protein	LOC_Os07g08660.1	--	40S ribosomal protein S15, putative, expressed
Seita.2G059900	black	yes	1620.84	0.961567	AT5G09500.1	--	Ribosomal protein S19 family protein	LOC_Os07g08660.1	--	40S ribosomal protein S15, putative, expressed
Seita.5G262600	black	yes	1737.34	0.961099	AT2G34480.1	--	Ribosomal protein L18ae/LX family protein	LOC_Os01g47660.1	--	60S ribosomal protein L18a, putative, expressed
Seita.9G409100	black	yes	1509.15	0.956991	AT3G05560.2	--	Ribosomal L22e protein family	LOC_Os03g22340.1	--	60S ribosomal protein L22-2, putative, expressed
Seita.9G035900	black	yes	1504.83	0.952931	AT5G02960.1	--	Ribosomal protein S12/S23 family protein	LOC_Os03g60400.1	--	40S ribosomal protein S23, putative, expressed
Seita.6G218600	black	yes	1535.97	0.951702	AT4G18100.1	--	Ribosomal protein L32e	LOC_Os08g41300.1	--	60S ribosomal protein L32, putative, expressed
Seita.9G057400	black	yes	1543.25	0.951566	AT2G20490.1	EDA27,NOP10	nucleolar RNA-binding Nop10p family protein	LOC_Os02g40514.1	--	h/ACA ribonucleoprotein complex subunit 3, putative, expressed
Seita.9G038300	black	yes	1587.99	0.950947	AT2G40510.1	--	Ribosomal protein S26e family protein	LOC_Os05g39960.1	--	40S ribosomal protein S26, putative, expressed
Seita.3G036600	black	yes	1630.81	0.94969	AT5G58420.1	--	Ribosomal protein S4 (RPS4A) family protein	LOC_Os02g01560.1	--	40S ribosomal protein S4, putative, expressed
Seita.7G156000	black	yes	1585.17	0.948613	AT3G55280.2	RPL23AB	ribosomal protein L23AB	LOC_Os01g24690.1	--	60S ribosomal protein L23A, putative, expressed
Seita.8G114300	black	yes	1460.44	0.945676	AT2G37270.2	ATRPS5B,RPS5B	ribosomal protein 5B	LOC_Os11g29190.2	--	40S ribosomal protein S5, putative, expressed
Seita.9G516900	black	yes	1495.95	0.939862	AT4G33250.1	ATTIF3K1,EIF3K,TIF3K1	eukaryotic translation initiation factor 3K	LOC_Os03g08450.1	--	eukaryotic translation initiation factor 3 subunit K, putative, expressed
Seita.5G374600	black	yes	1588.44	0.936938	AT1G07770.1	RPS15A	ribosomal protein S15A	LOC_Os02g27760.1	--	40S ribosomal protein S15a, putative, expressed
Seita.2G317300	black	yes	1424.53	0.936678	AT4G16720.1	--	Ribosomal protein L23/L15e family protein	LOC_Os03g40180.1	--	60S ribosomal protein L15, putative, expressed
Seita.7G065200	black	yes	1670.38	0.936136	AT1G10840.1	TIF3H1	translation initiation factor 3 subunit H1	LOC_Os04g30780.1	--	eukaryotic translation initiation factor 3 subunit H, putative, expressed
Seita.7G228400	black	yes	1561.64	0.935321	AT2G44120.2	--	Ribosomal protein L30/L7 family protein	LOC_Os04g51630.2	--	60S ribosomal protein L7, putative, expressed
Seita.1G214900	black	yes	1709.92	0.934512	AT1G74050.1	--	Ribosomal protein L6 family protein	LOC_Os04g39700.1	--	60S ribosomal protein L6, putative, expressed
Seita.5G413500	black	yes	1502.28	0.928848	AT5G39740.1	OLI7,RPL5B	ribosomal protein L5 B	LOC_Os01g67134.1	--	ribosomal L18p/L5e family protein, putative, expressed
Seita.7G069200	black	yes	1413.78	0.928611	AT3G10950.1	--	Zinc-binding ribosomal protein family protein	LOC_Os05g48320.1	--	60S ribosomal protein L37a, putative, expressed
Seita.7G081100	black	yes	1651.77	0.928044	AT3G61110.1	ARS27A,RS27A	ribosomal protein S27	LOC_Os04g27860.1	--	40S ribosomal protein S27, putative, expressed
Seita.4G160400	black	yes	1764.05	0.927659	AT4G15000.1	--	Ribosomal L27e protein family	LOC_Os10g41470.1	--	60S ribosomal protein L27-3, putative, expressed
Seita.1G314000	black	yes	1529.69	0.927645	AT5G59240.1	--	Ribosomal protein S8e family protein	LOC_Os04g28180.1	--	ribosomal protein, putative, expressed
Seita.5G025800	black	yes	1539.17	0.926969	AT3G06680.1	--	Ribosomal L29e protein family	LOC_Os05g28750.1	--	60S ribosomal protein L29-2, putative, expressed
Seita.4G043900	black	yes	1624.2	0.92589	AT3G16780.1	--	Ribosomal protein L19e family protein	LOC_Os03g38260.1	--	60S ribosomal protein L19-3, putative, expressed
Seita.3G197300	black	yes	1567.17	0.924254	AT1G77940.1	--	Ribosomal protein L7Ae/L30e/S12e/Gadd45 family protein	LOC_Os05g41110.2	--	ribosomal protein L7Ae, putative, expressed
Seita.1G181800	black	yes	1494	0.920184	AT3G52580.1	--	Ribosomal protein S11 family protein	LOC_Os02g33140.1	--	ribosomal protein, putative, expressed
Seita.6G231700	black	yes	1440.54	0.916057	AT3G59540.1	--	Ribosomal L38e protein family	LOC_Os11g24610.1	--	60S ribosomal protein L38, putative, expressed
Seita.5G065000	black	yes	1629.77	0.915948	AT3G11940.2	AML1,ATRPS5A,RPS5A	ribosomal protein 5A	LOC_Os11g29190.2	--	40S ribosomal protein S5, putative, expressed
Seita.9G468800	black	yes	1575.13	0.91323	AT3G45030.1	--	Ribosomal protein S10p/S20e family protein	LOC_Os03g14530.1	--	S10/S20 domain containing ribosomal protein, putative, expressed
Seita.3G205000	black	yes	1505.1	0.910525	AT2G40510.1	--	Ribosomal protein S26e family protein	LOC_Os05g39960.3	--	40S ribosomal protein S26, putative, expressed
Seita.1G351900	black	yes	1435.77	0.910334	AT4G31985.1	--	Ribosomal protein L39 family protein	LOC_Os02g55370.1	--	60S ribosomal protein L39, putative, expressed
Seita.9G403000	black	yes	1780.79	0.909649	AT1G56110.1	NOP56	homolog of nucleolar protein NOP56	LOC_Os03g22880.1	--	nucleolar protein 5A, putative, expressed
Seita.2G387500	black	yes	1630.68	0.908433	AT1G70600.1	--	Ribosomal protein L18e/L15 superfamily protein	LOC_Os03g29460.1	--	60S ribosomal protein, putative, expressed
Seita.5G144900	black	yes	1407.39	0.905681	AT3G58700.1	--	Ribosomal L5P family protein	LOC_Os01g10820.1	--	ribosomal protein L5, putative, expressed
Seita.8G046000	black	yes	1602.59	0.905333	AT1G43170.6	ARP1,emb2207,RP1,RPL3A	ribosomal protein 1	LOC_Os12g07010.1	--	ribosomal protein L3, putative, expressed
Seita.1G003100	black	yes	1472.24	0.90488	AT1G33140.1	PGY2	Ribosomal protein L6 family	LOC_Os09g31180.1	--	ribosomal protein L6, putative, expressed
Seita.4G177300	black	yes	1565.42	0.904096	AT3G62870.1	--	Ribosomal protein L7Ae/L30e/S12e/Gadd45 family protein	LOC_Os09g32976.1	--	ribosomal protein L7Ae, putative, expressed
Seita.5G271000	black	yes	1387.16	0.902427	AT3G10950.1	--	Zinc-binding ribosomal protein family protein	LOC_Os05g48320.1	--	60S ribosomal protein L37a, putative, expressed
Seita.9G575800	black	yes	1339.17	0.901993	AT5G61170.1	--	Ribosomal protein S19e family protein	LOC_Os03g31090.1	--	40S ribosomal protein S19, putative, expressed
Seita.7G314300	black	yes	1456.49	0.897297	AT1G27400.1	--	Ribosomal protein L22p/L17e family protein	LOC_Os09g08430.1	--	ribosomal protein L22, putative, expressed
Seita.3G276200	black	yes	1646.96	0.895931	AT3G06680.1	--	Ribosomal L29e protein family	LOC_Os05g28750.1	--	60S ribosomal protein L29-2, putative, expressed
Seita.9G544700	black	yes	1650.06	0.89585	AT1G57660.1	--	Translation protein SH3-like family protein	LOC_Os03g04750.1	--	60S ribosomal protein L21-2, putative, expressed
Seita.6G084900	black	yes	1461.78	0.89105	AT4G00100.1	ATRPS13A,PFL2,RPS13,RPS13A	ribosomal protein S13A	LOC_Os08g02410.1	--	40S ribosomal protein S13, putative, expressed
Seita.1G160500	black	yes	1476.36	0.890332	AT3G61110.1	ARS27A,RS27A	ribosomal protein S27	LOC_Os04g27860.1	--	40S ribosomal protein S27, putative, expressed
Seita.2G262800	black	yes	1537.86	0.890197	AT4G18100.1	--	Ribosomal protein L32e	LOC_Os08g41300.1	--	60S ribosomal protein L32, putative, expressed
Seita.9G228700	black	yes	1514.33	0.8898	AT1G04480.1	--	Ribosomal protein L14p/L23e family protein	LOC_Os03g04590.1	--	ribosomal protein, putative, expressed
Seita.1G028300	black	yes	1749.69	0.888887	AT5G28060.1	--	Ribosomal protein S24e family protein	LOC_Os02g13530.1	--	40S ribosomal protein S24, putative, expressed
Seita.3G362000	black	yes	1507.87	0.88869	AT5G10360.1	EMB3010,RPS6B	Ribosomal protein S6e	LOC_Os03g27260.1	--	40S ribosomal protein S6, putative, expressed
Seita.9G361400	black	yes	1527.39	0.888393	AT5G61170.1	--	Ribosomal protein S19e family protein	LOC_Os03g31090.1	--	40S ribosomal protein S19, putative, expressed
Seita.4G023300	black	yes	1424.54	0.88803	AT3G45030.1	--	Ribosomal protein S10p/S20e family protein	LOC_Os06g04290.1	--	S10/S20 domain containing ribosomal protein, putative, expressed
Seita.7G267500	black	yes	1826.34	0.884563	AT3G05590.1	RPL18	ribosomal protein L18	LOC_Os05g06310.1	--	60S ribosomal protein L18-3, putative, expressed
Seita.2G429500	black	yes	1535.53	0.883496	AT3G05560.1	--	Ribosomal L22e protein family	LOC_Os03g22340.1	--	60S ribosomal protein L22-2, putative, expressed
Seita.6G085600	black	yes	1457.42	0.878966	AT5G24510.1	--	60S acidic ribosomal protein family	LOC_Os08g02340.1	--	60S acidic ribosomal protein, putative, expressed
Seita.4G005200	black	yes	1526.7	0.878936	AT1G33140.1	PGY2	Ribosomal protein L6 family	LOC_Os09g31180.1	--	ribosomal protein L6, putative, expressed
Seita.9G371600	black	yes	1597.94	0.878496	AT3G04770.2	RPSAb	40s ribosomal protein SA B	LOC_Os03g08440.1	--	ribosomal protein S2, putative, expressed
Seita.7G166100	black	yes	1551.68	0.878222	AT2G20450.1	--	Ribosomal protein L14	LOC_Os02g40880.1	--	ribosomal protein L14, putative, expressed
Seita.4G241800	black	yes	1366.64	0.877725	AT4G25890.1	--	60S acidic ribosomal protein family	LOC_Os01g13080.1	--	60S acidic ribosomal protein, putative, expressed
Seita.5G096600	black	yes	1711.02	0.876694	AT3G49910.1	--	Translation protein SH3-like family protein	LOC_Os12g05430.1	--	ribosomal protein L24, putative, expressed
Seita.9G410200	black	yes	1714.57	0.876481	AT3G05590.1	RPL18	ribosomal protein L18	LOC_Os03g22180.1	--	60S ribosomal protein L18-3, putative, expressed
Seita.9G218400	black	yes	1532.41	0.873339	AT3G10610.1	--	Ribosomal S17 family protein	LOC_Os10g27190.1	--	40S ribosomal protein S17, putative, expressed
Seita.2G262900	black	yes	1308.92	0.872415	AT4G18100.1	--	Ribosomal protein L32e	LOC_Os08g41300.1	--	60S ribosomal protein L32, putative, expressed
Seita.9G229600	black	yes	1305.72	0.869989	AT1G57660.1	--	Translation protein SH3-like family protein	LOC_Os03g04750.1	--	60S ribosomal protein L21-2, putative, expressed
Seita.6G017200	black	yes	1555.45	0.869555	AT3G13580.2	--	Ribosomal protein L30/L7 family protein	LOC_Os08g13690.1	--	60S ribosomal protein L7, putative, expressed
Seita.7G315600	black	yes	1531.17	0.869544	AT5G23535.1	--	KOW domain-containing protein	LOC_Os11g04370.1	--	ribosomal protein L24, putative, expressed
Seita.4G181700	black	yes	1734.27	0.867316	AT5G28060.1	--	Ribosomal protein S24e family protein	LOC_Os01g52490.1	--	40S ribosomal protein S24, putative, expressed
Seita.7G157100	black	yes	1512.81	0.865154	AT3G48930.1	EMB1080	Nucleic acid-binding, OB-fold-like protein	LOC_Os04g42380.1	--	ribosomal protein S17, putative, expressed
Seita.2G046800	black	yes	1651.49	0.864396	AT4G16720.1	--	Ribosomal protein L23/L15e family protein	LOC_Os05g19370.1	--	60S ribosomal protein L15, putative, expressed
Seita.2G134200	black	yes	1544.51	0.86383	AT4G39200.1	--	Ribosomal protein S25 family protein	LOC_Os08g44480.1	--	40S ribosomal protein S25, putative, expressed
Seita.7G099000	black	yes	1743.24	0.862809	AT4G25740.1	--	RNA binding Plectin/S10 domain-containing protein	LOC_Os04g35090.1	--	40S ribosomal protein S10, putative, expressed
Seita.2G048400	black	yes	1736.61	0.862805	AT1G22780.1	PFL,PFL1,RPS18A	Ribosomal protein S13/S18 family	LOC_Os03g58050.1	--	ribosomal protein S13p/S18e, putative, expressed
Seita.3G193200	black	yes	1509.71	0.862692	--	--	--	--	--	--
Seita.3G181500	black	yes	1470.93	0.861805	AT5G18790.1	--	Ribosomal protein L33 family protein	LOC_Os05g37884.1	--	50S ribosomal protein L33, putative, expressed
Seita.6G035600	black	yes	1584.95	0.85916	AT3G18610.1	ATNUC-L2,NUC-L2,PARLL1	nucleolin like 2	LOC_Os04g52960.1	--	nucleolin, putative, expressed
Seita.7G232800	black	yes	1354.45	0.858652	AT4G18730.1	RPL16B	ribosomal protein L16B	LOC_Os02g14059.1	--	ribosomal protein L5, putative, expressed
Seita.9G473900	black	yes	1687.08	0.856414	AT1G20580.1	--	Small nuclear ribonucleoprotein family protein	LOC_Os02g01250.1	--	LSM domain containing protein, expressed
Seita.1G297300	black	yes	1294.36	0.856093	AT5G56710.1	--	Ribosomal protein L31e family protein	LOC_Os02g48660.1	--	60S ribosomal protein L31, putative, expressed
Seita.9G437500	black	yes	1489.96	0.854643	AT3G02560.2	--	Ribosomal protein S7e family protein	LOC_Os03g18570.1	--	40S ribosomal protein S7, putative, expressed
Seita.3G199800	black	yes	1434.36	0.850695	AT2G36620.1	RPL24A	ribosomal protein L24	LOC_Os05g40820.2	--	ribosomal protein L24, putative, expressed
Seita.9G546200	black	yes	1329.89	0.845834	AT1G04480.1	--	Ribosomal protein L14p/L23e family protein	LOC_Os03g04590.1	--	ribosomal protein, putative, expressed
Seita.4G043000	black	yes	1266.78	0.844571	AT1G74270.1	--	Ribosomal protein L35Ae family protein	LOC_Os02g54470.2	--	60S ribosomal protein L35a-3, putative, expressed
Seita.5G350700	black	yes	1480.6	0.844239	AT5G62270.2	--	--	LOC_Os01g58750.1	--	expressed protein
Seita.9G527500	black	yes	1361.58	0.84391	AT3G10090.1	--	Nucleic acid-binding, OB-fold-like protein	LOC_Os10g27174.1	--	40S ribosomal protein S28, putative, expressed
Seita.5G371300	black	yes	1618.18	0.843639	AT5G02960.1	--	Ribosomal protein S12/S23 family protein	LOC_Os03g60400.1	--	40S ribosomal protein S23, putative, expressed
Seita.6G217300	black	yes	1719.94	0.842845	AT4G18100.1	--	Ribosomal protein L32e	LOC_Os08g41300.1	--	60S ribosomal protein L32, putative, expressed
Seita.9G087700	black	yes	1473.58	0.842541	AT5G48760.2	--	Ribosomal protein L13 family protein	LOC_Os03g54890.1	--	ribosomal protein L13, putative, expressed
Seita.2G362700	black	yes	1463.82	0.841268	AT4G00100.1	ATRPS13A,PFL2,RPS13,RPS13A	ribosomal protein S13A	LOC_Os07g38540.1	--	40S ribosomal protein S13, putative, expressed
Seita.7G134600	black	yes	1689.7	0.839556	AT1G74050.1	--	Ribosomal protein L6 family protein	LOC_Os04g39700.1	--	60S ribosomal protein L6, putative, expressed
Seita.5G053700	black	yes	1713.05	0.838888	AT1G22780.1	PFL,PFL1,RPS18A	Ribosomal protein S13/S18 family	LOC_Os07g07709.1	--	ribosomal protein S13p/S18e, putative, expressed
Seita.9G158600	black	yes	1694.37	0.83752	AT4G05410.1	YAO	Transducin/WD40 repeat-like superfamily protein	LOC_Os03g42770.1	--	expressed protein
Seita.8G161700	black	yes	1645.53	0.837038	AT3G03920.1	--	H/ACA ribonucleoprotein complex, subunit Gar1/Naf1 protein	LOC_Os11g37080.1	--	h/ACA ribonucleoprotein complex subunit 1-like protein 1, putative, expressed
Seita.6G192700	black	yes	1464.55	0.836907	AT3G44590.2	--	60S acidic ribosomal protein family	LOC_Os02g32760.1	--	60S acidic ribosomal protein, putative, expressed
Seita.6G204000	black	yes	1469.82	0.836401	AT2G19740.1	--	Ribosomal protein L31e family protein	LOC_Os08g39500.1	--	60S ribosomal protein L31, putative, expressed
Seita.1G058600	black	yes	1464.65	0.836088	AT4G37090.1	--	--	LOC_Os02g09380.1	--	expressed protein
Seita.5G288600	black	yes	1340.15	0.834214	AT2G19730.3	--	Ribosomal L28e protein family	LOC_Os01g51020.1	--	60S ribosomal protein L28-1, putative, expressed
Seita.1G166300	black	yes	1529.76	0.832938	AT2G39390.1	--	Ribosomal L29 family protein	LOC_Os02g30050.1	--	ribosomal protein L29, putative, expressed
Seita.6G224900	black	yes	1542.43	0.83216	AT3G62870.1	--	Ribosomal protein L7Ae/L30e/S12e/Gadd45 family protein	LOC_Os09g32976.1	--	ribosomal protein L7Ae, putative, expressed
Seita.9G407100	black	yes	1318.99	0.832044	AT5G27700.1	--	Ribosomal protein S21e	LOC_Os03g46490.1	--	40S ribosomal protein S21, putative, expressed
Seita.5G301700	black	yes	1318.56	0.831058	AT5G28060.1	--	Ribosomal protein S24e family protein	LOC_Os01g52490.1	--	40S ribosomal protein S24, putative, expressed
Seita.4G057100	black	yes	1602.07	0.829194	AT5G56670.1	--	Ribosomal protein S30 family protein	LOC_Os06g07580.2	--	expressed protein
Seita.1G039900	black	yes	1385.73	0.828034	AT4G26055.1	--	--	LOC_Os09g07614.1	--	expressed protein
Seita.1G302700	black	yes	1429.55	0.827199	AT5G47680.1	--	--	LOC_Os02g49360.1	--	RNA methyltransferase domain-containing protein 2, putative, expressed
Seita.9G131800	black	yes	1411.89	0.826979	AT5G27700.1	--	Ribosomal protein S21e	LOC_Os03g46490.1	--	40S ribosomal protein S21, putative, expressed
Seita.9G319200	black	yes	1693.93	0.825607	AT4G09320.1	NDPK1	Nucleoside diphosphate kinase family protein	LOC_Os10g41410.2	--	nucleoside diphosphate kinase, putative, expressed
Seita.9G502500	black	yes	1867.22	0.825531	AT4G34670.1	--	Ribosomal protein S3Ae	LOC_Os03g10340.1	--	40S ribosomal protein S3a, putative, expressed
Seita.9G009200	black	yes	1455.53	0.823791	AT4G02930.1	--	GTP binding Elongation factor Tu family protein	LOC_Os03g63410.1	--	elongation factor Tu, putative, expressed
Seita.5G043000	black	yes	1713.7	0.821334	AT3G18740.1	--	Ribosomal protein L7Ae/L30e/S12e/Gadd45 family protein	LOC_Os01g16890.1	--	ribosomal protein L7Ae, putative, expressed
Seita.9G147000	black	yes	1602.77	0.820724	AT3G56210.1	--	ARM repeat superfamily protein	LOC_Os03g46310.1	--	expressed protein
Seita.9G206700	black	yes	1760.59	0.818418	AT2G18220.1	--	Noc2p family	LOC_Os10g35280.1	--	nucleolar complex protein 2, putative, expressed
Seita.6G050300	black	yes	1722.87	0.818182	AT5G35530.1	--	Ribosomal protein S3 family protein	LOC_Os03g38000.1	--	40S ribosomal protein S3-1, putative, expressed
Seita.2G430300	black	yes	1597.05	0.817761	AT5G27850.1	--	Ribosomal protein L18e/L15 superfamily protein	LOC_Os07g47780.2	--	60S ribosomal protein L18-3, putative, expressed
Seita.3G065200	black	yes	1437.73	0.817136	AT2G47640.3	--	Small nuclear ribonucleoprotein family protein	LOC_Os05g24970.2	--	LSM domain containing protein, expressed
Seita.6G112100	black	yes	1602.4	0.813875	AT1G27400.1	--	Ribosomal protein L22p/L17e family protein	LOC_Os09g08430.1	--	ribosomal protein L22, putative, expressed
Seita.2G204000	black	yes	1429.87	0.808566	AT1G26880.1	--	Ribosomal protein L34e superfamily protein	LOC_Os09g24690.1	--	60S ribosomal protein L34, putative, expressed
Seita.9G248800	black	yes	1464.66	0.808263	AT1G48830.2	--	Ribosomal protein S7e family protein	LOC_Os03g18570.1	--	40S ribosomal protein S7, putative, expressed
Seita.1G073500	black	yes	1416.76	0.807509	AT1G23290.1	RPL27A,RPL27AB	Ribosomal protein L18e/L15 superfamily protein	LOC_Os07g42170.1	--	60S ribosomal protein, putative, expressed
Seita.5G061400	black	yes	1373.24	0.805907	AT3G17465.1	RPL3P	ribosomal protein L3 plastid	LOC_Os01g14830.1	--	ribosomal protein L3, putative, expressed
Seita.9G028900	black	yes	1375.02	0.805686	AT2G29530.1	TIM10	Tim10/DDP family zinc finger protein	LOC_Os03g61019.1	--	mitochondrial import inner membrane translocase subunit Tim, putative, expressed
Seita.4G122000	black	yes	1423.53	0.804801	AT5G08180.2	--	Ribosomal protein L7Ae/L30e/S12e/Gadd45 family protein	LOC_Os06g16290.1	--	ribosomal protein L7Ae, putative, expressed
Seita.6G243700	black	yes	1830.35	0.800605	AT1G08360.1	--	Ribosomal protein L1p/L10e family	LOC_Os08g44380.2	--	L1P family of ribosomal proteins domain containing protein, expressed
Seita.7G143100	black	yes	1711.86	0.800315	AT5G50310.1	--	Galactose oxidase/kelch repeat superfamily protein	LOC_Os04g40740.1	--	kelch repeat protein, putative, expressed
Seita.3G153000	black	no	1358.53	0.798575	AT1G74270.1	--	Ribosomal protein L35Ae family protein	LOC_Os05g48310.1	--	60S ribosomal protein L35a-3, putative, expressed
Seita.3G117500	black	no	1273.26	0.798487	AT3G44750.2	ATHD2A,HD2A,HDA3,HDT1	histone deacetylase 3	LOC_Os05g51830.1	--	ZOS5-12 - C2H2 zinc finger protein, expressed
Seita.7G234800	black	no	1829.4	0.796514	AT5G23740.1	RPS11-BETA	ribosomal protein S11-beta	LOC_Os08g10608.1	--	ribosomal protein S17, putative, expressed
Seita.5G257500	black	no	1433.53	0.796453	AT2G19385.1	--	zinc ion binding	LOC_Os01g40110.1	--	ZOS1-11 - C2H2 zinc finger protein, expressed
Seita.9G473700	black	no	1533.56	0.794956	AT4G22380.1	--	Ribosomal protein L7Ae/L30e/S12e/Gadd45 family protein	LOC_Os03g13800.1	--	ribosomal protein L7Ae, putative, expressed
Seita.1G363100	black	no	1287.49	0.793738	AT2G33370.1	--	Ribosomal protein L14p/L23e family protein	LOC_Os02g56960.1	--	ribosomal protein, putative, expressed
Seita.2G137800	black	no	1495.8	0.790187	AT3G56070.2	ROC2	rotamase cyclophilin 2	LOC_Os09g39780.1	--	peptidyl-prolyl cis-trans isomerase, putative, expressed
Seita.3G361100	black	no	1653.23	0.788333	AT5G39850.1	--	Ribosomal protein S4	LOC_Os03g05980.1	--	40S ribosomal protein S9-2, putative, expressed
Seita.8G007700	black	no	1303.43	0.78833	AT2G09990.1	--	Ribosomal protein S5 domain 2-like superfamily protein	LOC_Os12g03090.1	--	ribosomal protein, putative, expressed
Seita.9G528100	black	no	1551.78	0.787606	AT3G07030.1	--	Alba DNA/RNA-binding protein	LOC_Os03g06980.1	--	nucleic acid binding protein, putative, expressed
Seita.2G378300	black	no	1676.31	0.787143	AT4G34670.1	--	Ribosomal protein S3Ae	LOC_Os03g10340.1	--	40S ribosomal protein S3a, putative, expressed
Seita.9G044700	black	no	1513.06	0.786212	AT3G57490.1	--	Ribosomal protein S5 family protein	LOC_Os03g59310.1	--	ribosomal protein, putative, expressed
Seita.1G117100	black	no	1399.68	0.784946	AT3G13580.3	--	Ribosomal protein L30/L7 family protein	LOC_Os08g13690.1	--	60S ribosomal protein L7, putative, expressed
Seita.3G150300	black	no	1695.39	0.782784	AT4G30930.1	NFD1	Ribosomal protein L21	LOC_Os05g48410.1	--	50S ribosomal protein L21, chloroplast precursor, putative, expressed
Seita.2G389700	black	no	1402.55	0.781896	AT3G04770.2	RPSAb	40s ribosomal protein SA B	LOC_Os07g42450.1	--	ribosomal protein S2, putative, expressed
Seita.7G132400	black	no	1536.4	0.781228	AT4G02840.1	--	Small nuclear ribonucleoprotein family protein	LOC_Os04g39444.1	--	LSM domain containing protein, expressed
Seita.5G042800	black	no	1623.72	0.78058	AT3G20000.1	TOM40	translocase of the outer mitochondrial membrane 40	LOC_Os01g16910.1	--	outer mitochondrial membrane porin, putative, expressed
Seita.4G051300	black	no	1576.75	0.777054	AT4G31985.1	--	Ribosomal protein L39 family protein	LOC_Os02g55370.1	--	60S ribosomal protein L39, putative, expressed
Seita.4G254100	black	no	1589.56	0.775224	AT3G11830.1	--	TCP-1/cpn60 chaperonin family protein	LOC_Os06g47320.1	--	T-complex protein, putative, expressed
Seita.1G034300	black	no	1658.45	0.774648	AT1G09640.1	--	Translation elongation factor EF1B, gamma chain	LOC_Os06g37440.1	--	elongation factor 1-gamma, putative, expressed
Seita.4G012200	black	no	1348.26	0.774525	AT4G29430.1	rps15ae	ribosomal protein S15A E	LOC_Os02g15610.1	--	40S ribosomal protein S15a, putative, expressed
Seita.5G301000	black	no	1374.78	0.771024	AT4G17520.1	--	Hyaluronan / mRNA binding family	LOC_Os01g52390.1	--	plasminogen activator inhibitor 1 RNA-binding protein, putative, expressed
Seita.2G112000	black	no	1349.81	0.770694	AT4G36130.1	--	Ribosomal protein L2 family	LOC_Os12g38000.1	--	60S ribosomal protein L8, putative, expressed
Seita.2G267400	black	no	1932.28	0.769119	AT3G62870.1	--	Ribosomal protein L7Ae/L30e/S12e/Gadd45 family protein	LOC_Os08g23710.1	--	ribosomal protein L7Ae, putative, expressed
Seita.4G066800	black	no	1595.38	0.767472	AT2G46230.1	--	PIN domain-like family protein	LOC_Os06g06410.2	--	rRNA-processing protein FCF, putative, expressed
Seita.1G257100	black	no	1659.92	0.765304	AT4G17510.1	UCH3	ubiquitin C-terminal hydrolase 3	LOC_Os02g43760.1	--	ubiquitin carboxyl-terminal hydrolase, family 1, putative, expressed
Seita.5G422200	black	no	1444.35	0.765009	AT3G44750.1	ATHD2A,HD2A,HDA3,HDT1	histone deacetylase 3	LOC_Os05g51830.1	--	ZOS5-12 - C2H2 zinc finger protein, expressed
Seita.7G222200	black	no	1322.09	0.762162	AT2G37190.1	--	Ribosomal protein L11 family protein	LOC_Os04g50990.1	--	L11 domain containing ribosomal protein, putative, expressed
Seita.3G235300	black	no	1252.97	0.761405	AT2G32060.2	--	Ribosomal protein L7Ae/L30e/S12e/Gadd45 family protein	LOC_Os07g05580.1	--	ribosomal protein L7Ae, putative, expressed
Seita.1G344200	black	no	1753.91	0.760293	AT1G74270.1	--	Ribosomal protein L35Ae family protein	LOC_Os02g54470.2	--	60S ribosomal protein L35a-3, putative, expressed
Seita.1G305100	black	no	1439.25	0.759163	AT5G08180.1	--	Ribosomal protein L7Ae/L30e/S12e/Gadd45 family protein	LOC_Os02g49610.1	--	ribosomal protein L7Ae, putative, expressed
Seita.3G072100	black	no	1496.86	0.759108	AT2G43780.2	--	--	LOC_Os05g01330.1	--	expressed protein
Seita.1G236300	black	no	1318.04	0.758502	AT2G20490.1	EDA27,NOP10	nucleolar RNA-binding Nop10p family protein	LOC_Os02g40514.1	--	h/ACA ribonucleoprotein complex subunit 3, putative, expressed
Seita.2G122900	black	no	1390.31	0.757717	AT4G14320.1	--	Zinc-binding ribosomal protein family protein	LOC_Os07g26740.1	--	60S ribosomal protein L44, putative, expressed
Seita.9G541600	black	no	1461.05	0.756948	AT3G09890.1	--	Ankyrin repeat family protein	LOC_Os03g05260.1	--	ankyrin repeat domain containing protein, expressed
Seita.7G057900	black	no	1859.41	0.754681	AT5G59240.1	--	Ribosomal protein S8e family protein	LOC_Os04g28180.1	--	ribosomal protein, putative, expressed
Seita.9G566000	black	no	1565.54	0.75427	--	--	--	LOC_Os04g01940.1	--	expressed protein
Seita.6G075100	black	no	1415.27	0.752843	AT2G40010.1	--	Ribosomal protein L10 family protein	LOC_Os08g03640.1	--	60S acidic ribosomal protein P0, putative, expressed
Seita.7G290900	black	no	1494.1	0.751817	AT1G43170.3	ARP1,emb2207,RP1,RPL3A	ribosomal protein 1	LOC_Os12g07010.1	--	ribosomal protein L3, putative, expressed
Seita.2G312200	black	no	1605.84	0.751434	AT1G06790.1	--	RNA polymerase Rpb7 N-terminal domain-containing protein	LOC_Os07g29420.3	--	DNA-directed RNA polymerase III subunit RPC8, putative, expressed
Seita.2G394600	black	no	1893.5	0.751354	AT5G10360.1	EMB3010,RPS6B	Ribosomal protein S6e	LOC_Os03g27260.1	--	40S ribosomal protein S6, putative, expressed
Seita.7G270700	black	no	1415.7	0.749986	AT1G23410.1	--	Ribosomal protein S27a / Ubiquitin family protein	LOC_Os05g06770.1	--	40S ribosomal protein S27a, putative, expressed
Seita.5G424100	black	no	1630.54	0.749003	AT1G04900.1	--	Protein of unknown function (DUF185)	LOC_Os01g68390.1	--	Uncharacterized ACR, COG1565 containing protein, putative, expressed
Seita.1G119400	black	no	1665.28	0.747026	AT1G15250.1	--	Zinc-binding ribosomal protein family protein	LOC_Os02g02130.1	--	ribosomal protein L37, putative, expressed
Seita.9G073900	black	no	1290.36	0.746634	AT3G43980.1	--	Ribosomal protein S14p/S29e family protein	LOC_Os03g56241.1	--	40S ribosomal protein S29, putative, expressed
Seita.9G006600	black	no	1599.57	0.746374	AT2G35790.1	--	--	LOC_Os03g63680.1	--	expressed protein
Seita.3G360000	black	no	1458.07	0.746011	AT4G00850.1	GIF3	GRF1-interacting factor 3	LOC_Os12g31350.1	--	SSXT protein, putative, expressed
Seita.2G417700	black	no	1369.08	0.745708	AT3G49080.1	--	Ribosomal protein S5 domain 2-like superfamily protein	LOC_Os07g46440.1	--	ribosomal protein, putative, expressed
Seita.9G404600	black	no	1964.11	0.745696	AT3G05060.1	--	NOP56-like pre RNA processing ribonucleoprotein	LOC_Os03g22730.1	--	nucleolar protein NOP5-1, putative, expressed
Seita.6G253600	black	no	1526.34	0.745462	AT2G36930.1	--	zinc finger (C2H2 type) family protein	LOC_Os08g45040.1	--	zinc finger protein 593, putative, expressed
Seita.9G451800	black	no	1363.52	0.743422	AT1G47278.2	--	--	LOC_Os03g16874.2	--	expressed protein
Seita.9G404700	black	no	1731.39	0.743286	AT3G05060.1	--	NOP56-like pre RNA processing ribonucleoprotein	LOC_Os03g22730.1	--	nucleolar protein NOP5-1, putative, expressed
Seita.2G421400	black	no	1853.73	0.742732	AT5G12110.1	--	Glutathione S-transferase, C-terminal-like;Translation elongation factor EF1B/ribosomal protein S6	LOC_Os07g46750.1	--	elongation factor protein, putative, expressed
Seita.2G259600	black	no	1638.7	0.742526	AT4G12590.1	--	Protein of unknown function DUF106, transmembrane	LOC_Os09g32220.1	--	pob, putative, expressed
Seita.5G376500	black	no	1191.87	0.742519	AT3G53740.2	--	Ribosomal protein L36e family protein	LOC_Os05g38520.2	--	60S ribosomal protein L36-2, putative, expressed
Seita.4G026800	black	no	1643.61	0.740603	AT4G01560.1	MEE49	Ribosomal RNA processing Brix domain protein	LOC_Os06g04600.2	--	Brix domain containing protein, putative, expressed
Seita.2G181800	black	no	1369.41	0.737524	AT3G16780.1	--	Ribosomal protein L19e family protein	LOC_Os03g38260.1	--	60S ribosomal protein L19-3, putative, expressed
Seita.3G145500	black	no	1730.12	0.736534	AT2G34480.1	--	Ribosomal protein L18ae/LX family protein	LOC_Os05g49030.1	--	60S ribosomal protein L18a, putative, expressed
Seita.2G135200	black	no	1259.05	0.736309	AT3G19508.1	--	--	LOC_Os01g24020.1	--	expressed protein
Seita.1G205300	black	no	1572.53	0.736165	AT2G32060.2	--	Ribosomal protein L7Ae/L30e/S12e/Gadd45 family protein	LOC_Os07g05580.1	--	ribosomal protein L7Ae, putative, expressed
Seita.5G275700	black	no	1832.4	0.735827	AT3G49010.1	ATBBC1,BBC1,RSU2	breast basic conserved 1	LOC_Os06g02510.2	--	ribosomal protein L13, putative, expressed
Seita.6G160000	black	no	1352.11	0.734983	AT1G26880.1	--	Ribosomal protein L34e superfamily protein	LOC_Os09g24690.1	--	60S ribosomal protein L34, putative, expressed
Seita.4G260300	black	no	1381.8	0.734712	AT1G05205.1	--	--	LOC_Os06g46700.1	--	expressed protein
Seita.5G028600	black	no	1387.36	0.733907	AT5G26800.1	--	--	LOC_Os01g19400.1	--	expressed protein
Seita.4G238500	black	no	1391.73	0.730323	AT4G29390.1	--	Ribosomal protein S30 family protein	LOC_Os06g07580.1	--	expressed protein
Seita.7G124100	black	no	1616.16	0.729356	AT1G26880.1	--	Ribosomal protein L34e superfamily protein	LOC_Os09g24690.1	--	60S ribosomal protein L34, putative, expressed
Seita.1G238800	black	no	1587.32	0.727441	AT2G20450.1	--	Ribosomal protein L14	LOC_Os02g40880.1	--	ribosomal protein L14, putative, expressed
Seita.1G363500	black	no	1236.17	0.725103	AT1G15250.1	--	Zinc-binding ribosomal protein family protein	LOC_Os02g56990.1	--	ribosomal protein L37, putative, expressed
Seita.5G099100	black	no	1590.58	0.721786	AT2G39795.1	--	Mitochondrial glycoprotein family protein	LOC_Os01g05010.1	--	mitochondrial glycoprotein, putative, expressed
Seita.9G096300	black	no	1284.05	0.72178	AT3G12390.1	--	Nascent polypeptide-associated complex (NAC), alpha subunit family protein	LOC_Os05g31000.1	--	nascent polypeptide-associated complex subunit alpha, putative, expressed
Seita.2G151200	black	no	1203.12	0.719921	AT3G02080.1	--	Ribosomal protein S19e family protein	LOC_Os03g31090.1	--	40S ribosomal protein S19, putative, expressed
Seita.7G273300	black	no	1652.46	0.719807	AT1G26910.1	RPL10B	Ribosomal protein L16p/L10e family protein	LOC_Os11g11390.1	--	ribosomal protein, putative, expressed
Seita.9G173200	black	no	1349.55	0.7171	AT5G08040.1	TOM5	mitochondrial import receptor subunit TOM5 homolog	LOC_Os12g38650.1	--	expressed protein
Seita.9G513500	black	no	1679.63	0.716841	AT5G62440.1	--	Protein of unknown function (DUF3223)	LOC_Os03g08810.1	--	expressed protein
Seita.5G327400	black	no	1609.62	0.716492	AT3G02220.1	--	--	LOC_Os01g55730.1	--	AGAP003732-PA, putative, expressed
Seita.3G149800	black	no	1520.1	0.714869	AT3G61620.1	RRP41	3\'-5\'-exoribonuclease family protein	LOC_Os09g07820.1	--	exosome complex exonuclease, putative, expressed
Seita.1G356100	black	no	1701.34	0.713972	AT5G57280.1	--	S-adenosyl-L-methionine-dependent methyltransferases superfamily protein	LOC_Os02g56020.1	--	methyltransferase, putative, expressed
Seita.8G166100	black	no	1471.3	0.711302	AT2G20060.1	--	Ribosomal protein L4/L1 family	LOC_Os11g37510.1	--	ribosomal protein L4, putative, expressed
Seita.1G207100	black	no	1891.92	0.710637	AT1G18800.1	NRP2	NAP1-related protein 2	LOC_Os02g36710.1	--	SET, putative, expressed
Seita.5G276200	black	no	1706.69	0.710216	AT3G49010.2	ATBBC1,BBC1,RSU2	breast basic conserved 1	LOC_Os06g02510.1	--	ribosomal protein L13, putative, expressed
Seita.6G062900	black	no	1532.72	0.709495	AT2G18740.1	--	Small nuclear ribonucleoprotein family protein	LOC_Os08g05530.1	--	LSM domain containing protein, expressed
Seita.1G355000	black	no	1560.54	0.708892	AT1G15810.1	--	S15/NS1, RNA-binding protein	LOC_Os02g55940.1	--	ribosomal protein S15 containing protein, expressed
Seita.9G438300	black	no	1557.32	0.7086	AT3G10110.1	MEE67	Mitochondrial import inner membrane translocase subunit Tim17/Tim22/Tim23 family protein	LOC_Os03g18500.2	--	mitochondrial import inner membrane translocase subunit Tim17, putative, expressed
Seita.1G161400	black	no	1452.43	0.707923	AT5G52370.1	--	--	LOC_Os02g27960.1	--	expressed protein
Seita.9G203600	black	no	1448.14	0.707022	AT4G28360.1	--	Ribosomal protein L22p/L17e family protein	LOC_Os01g42980.1	--	ribosomal protein L22, putative, expressed
Seita.9G543500	black	no	1462.83	0.705955	AT2G26200.1	--	S-adenosyl-L-methionine-dependent methyltransferases superfamily protein	LOC_Os03g04940.1	--	methyltransferase, putative, expressed
Seita.7G113400	black	no	1350.53	0.705051	AT4G25340.1	ATFKBP53,FKBP53	FK506 BINDING PROTEIN 53	LOC_Os04g36890.1	--	peptidyl-prolyl cis-trans isomerase, FKBP-type, putative, expressed
Seita.6G058500	black	no	1372.42	0.702011	AT1G63780.1	IMP4	Ribosomal RNA processing Brix domain protein	LOC_Os08g05880.1	--	Brix domain containing protein, putative, expressed
Seita.6G124800	black	no	1349.34	0.701946	AT5G49410.2	--	--	LOC_Os08g27140.1	--	expressed protein
Seita.5G160100	black	no	1610.75	0.701664	AT2G47470.1	ATPDI11,ATPDIL2-1,MEE30,PDI11,UNE5	thioredoxin family protein	LOC_Os01g23740.1	--	OsPDIL2-2 protein disulfide isomerase PDIL2-2, expressed
Seita.4G176500	black	no	1672.61	0.701662	AT2G42710.1	--	Ribosomal protein L1p/L10e family	LOC_Os06g35470.1	--	L1P family of ribosomal proteins domain containing protein, expressed
Seita.9G009500	black	no	1576.22	0.701552	AT1G17880.1	ATBTF3,BTF3	basic transcription factor 3	LOC_Os03g63400.1	--	transcription factor BTF3, putative, expressed
Seita.5G123100	black	no	1839.28	0.701315	AT5G20080.1	--	FAD/NAD(P)-binding oxidoreductase	LOC_Os01g07910.1	--	NADH-cytochrome b5 reductase, putative, expressed
Seita.6G248800	black	no	1951.28	0.700614	AT4G39200.1	--	Ribosomal protein S25 family protein	LOC_Os08g44480.1	--	40S ribosomal protein S25, putative, expressed
Seita.7G064700	black	no	1316.23	0.69819	AT2G39390.1	--	Ribosomal L29 family protein	LOC_Os02g30050.1	--	ribosomal protein L29, putative, expressed
Seita.6G007200	black	no	1384.21	0.697669	AT1G04170.1	EIF2 GAMMA	eukaryotic translation initiation factor 2 gamma subunit	LOC_Os12g41400.1	--	eukaryotic translation initiation factor 2 subunit gamma, putative, expressed
Seita.4G217500	black	no	1417.14	0.697593	AT1G47970.1	--	--	LOC_Os01g22990.1	--	acidic leucine-rich nuclear phosphoprotein 32-related protein 1, putative, expressed
Seita.4G234900	black	no	1371.91	0.697497	AT1G09640.1	--	Translation elongation factor EF1B, gamma chain	LOC_Os06g37440.1	--	elongation factor 1-gamma, putative, expressed
Seita.1G370900	black	no	1630.52	0.696652	AT4G25630.1	ATFIB2,FIB2	fibrillarin 2	LOC_Os02g57590.1	--	rRNA 2-O-methyltransferase fibrillarin 2, putative, expressed
Seita.9G559100	black	no	1698.38	0.695393	AT1G63980.2	--	D111/G-patch domain-containing protein	LOC_Os03g03390.1	--	G-patch domain containing protein, expressed
Seita.6G091500	black	no	1280.67	0.692972	AT4G25840.1	GPP1	glycerol-3-phosphatase 1	LOC_Os08g14580.1	--	haloacid dehalogenase-like hydrolase domain-containing protein 1A, putative, expressed
Seita.1G215000	black	no	1943.88	0.692552	AT3G15460.1	--	Ribosomal RNA processing Brix domain protein	LOC_Os02g37870.1	--	Brix domain containing protein, putative, expressed
Seita.3G119800	black	no	1700.66	0.690279	AT5G52820.1	--	WD-40 repeat family protein / notchless protein, putative	LOC_Os11g38170.1	--	notchless protein, putative, expressed
Seita.2G368300	black	no	1709.68	0.690077	AT5G67630.1	--	P-loop containing nucleoside triphosphate hydrolases superfamily protein	LOC_Os06g08770.1	--	ruvB-like 2, putative, expressed
Seita.3G041200	black	no	1396.55	0.689769	AT1G42440.1	--	--	LOC_Os11g19250.1	--	AARP2CN domain containing protein, expressed
Seita.1G230300	black	no	1897.1	0.689054	AT3G55280.1	RPL23AB	ribosomal protein L23AB	LOC_Os01g24690.1	--	60S ribosomal protein L23A, putative, expressed
Seita.7G089200	black	no	1295.02	0.687299	AT3G44590.2	--	60S acidic ribosomal protein family	LOC_Os02g32760.1	--	60S acidic ribosomal protein, putative, expressed
Seita.7G311800	black	no	1352.57	0.686779	--	--	--	--	--	--
Seita.5G045100	black	no	1391.23	0.686741	AT3G52040.1	--	--	LOC_Os01g16550.1	--	expressed protein
Seita.2G405100	black	no	1465.38	0.686625	AT4G01790.1	--	Ribosomal protein L7Ae/L30e/S12e/Gadd45 family protein	LOC_Os07g44230.1	--	ribosomal protein L7Ae/L30e/S12e/Gadd45 family protein, putative, expressed
Seita.7G162500	black	no	1650.3	0.684758	AT3G16840.1	--	P-loop containing nucleoside triphosphate hydrolases superfamily protein	LOC_Os04g43140.1	--	DEAD-box ATP-dependent RNA helicase, putative, expressed
Seita.4G245900	black	no	1454.23	0.681562	AT3G59600.1	NRPB8B,NRPD8B,NRPE8B	RNA polymerase Rpb8	LOC_Os06g48230.1	--	DNA-directed RNA polymerases I, II, and III subunit RPABC3, putative, expressed
Seita.3G086300	black	no	1354.9	0.681434	AT3G01740.1	--	Mitochondrial ribosomal protein L37	LOC_Os12g14080.2	--	expressed protein
Seita.7G233200	black	no	1796.71	0.678965	--	--	--	LOC_Os04g52180.1	--	expressed protein
Seita.2G440400	black	no	1576.55	0.678327	AT5G26860.1	LON1,LON_ARA_ARA	lon protease 1	LOC_Os07g48960.1	--	OsLonP3 - Putative Lon protease homologue, expressed
Seita.2G424300	black	no	1495.15	0.677928	AT3G21465.1	--	--	LOC_Os07g47201.1	--	adenyl cyclase, putative, expressed
Seita.2G079700	black	no	1701.82	0.677473	AT3G57490.1	--	Ribosomal protein S5 family protein	LOC_Os03g59310.1	--	ribosomal protein, putative, expressed
Seita.5G313000	black	no	1533.16	0.67488	AT1G56070.1	LOS1	Ribosomal protein S5/Elongation factor G/III/V family protein	LOC_Os02g32030.1	--	elongation factor, putative, expressed
Seita.2G043400	black	no	1420.33	0.674864	AT2G46290.1	--	Transducin/WD40 repeat-like superfamily protein	LOC_Os08g21660.1	--	WD domain, G-beta repeat domain containing protein, expressed
Seita.4G139300	black	no	1622.48	0.674303	AT2G19740.1	--	Ribosomal protein L31e family protein	LOC_Os06g21480.1	--	60S ribosomal protein L31, putative, expressed
Seita.9G021800	black	no	1155.97	0.673288	--	--	--	--	--	--
Seita.8G020000	black	no	1181.59	0.67325	AT1G25260.1	--	Ribosomal protein L10 family protein	LOC_Os11g01420.1	--	ribosomal protein L10, putative, expressed
Seita.1G273700	black	no	1225.9	0.671206	AT1G61570.1	TIM13	translocase of the inner mitochondrial membrane 13	LOC_Os02g45820.1	--	mitochondrial import inner membrane translocase subunit Tim, putative, expressed
Seita.2G404800	black	no	1676.42	0.670846	AT3G57150.1	AtCBF5,AtNAP57,CBF5,NAP57	homologue of NAP57	LOC_Os07g44190.1	--	h/ACA ribonucleoprotein complex subunit 4, putative, expressed
Seita.3G039100	black	no	1294.27	0.670701	AT5G44710.1	--	--	LOC_Os05g05560.1	--	expressed protein
Seita.5G057000	black	no	1518.45	0.668585	AT3G57150.1	AtCBF5,AtNAP57,CBF5,NAP57	homologue of NAP57	LOC_Os07g44190.1	--	h/ACA ribonucleoprotein complex subunit 4, putative, expressed
Seita.2G260300	black	no	1291.34	0.6678	AT5G56940.1	--	Ribosomal protein S16 family protein	LOC_Os09g32274.1	--	30S ribosomal protein S16, putative, expressed
Seita.7G091900	black	no	1332.82	0.667282	AT3G52580.1	--	Ribosomal protein S11 family protein	LOC_Os02g33140.1	--	ribosomal protein, putative, expressed
Seita.6G222100	black	no	1365.87	0.667239	AT1G67430.1	--	Ribosomal protein L22p/L17e family protein	LOC_Os09g08430.1	--	ribosomal protein L22, putative, expressed
Seita.3G392000	black	no	1862.99	0.666878	AT5G46160.1	--	Ribosomal protein L14p/L23e family protein	LOC_Os12g42180.1	--	ribosomal protein, putative, expressed
Seita.6G162600	black	no	1678.45	0.666385	AT3G25430.1	--	Polynucleotidyl transferase, ribonuclease H-like superfamily protein	LOC_Os08g34160.1	--	CAF1 family ribonuclease containing protein, putative, expressed
Seita.7G169200	black	no	1527.37	0.663446	AT3G62840.1	--	Small nuclear ribonucleoprotein family protein	LOC_Os05g24970.2	--	LSM domain containing protein, expressed
Seita.6G227200	black	no	1372.18	0.661439	AT1G29880.1	--	glycyl-tRNA synthetase / glycine--tRNA ligase	LOC_Os08g42560.1	--	tRNA synthetase class II core domain containing protein, expressed
Seita.5G291000	black	no	1851.06	0.660443	AT2G19520.1	ACG1,ATMSI4,FVE,MSI4,NFC04,NFC4	Transducin family protein / WD-40 repeat family protein	LOC_Os01g51300.2	--	WD domain, G-beta repeat domain containing protein, expressed
Seita.1G235900	black	no	1416.97	0.66022	AT5G40080.1	--	Mitochondrial ribosomal protein L27	LOC_Os02g40490.1	--	expressed protein
Seita.6G084200	black	no	1225.92	0.659504	AT5G53070.1	--	Ribosomal protein L9/RNase H1	LOC_Os05g45270.1	--	ribosomal L9, putative, expressed
Seita.1G048900	black	no	1701.56	0.659464	AT2G04540.1	--	Beta-ketoacyl synthase	LOC_Os02g10320.1	--	3-oxoacyl-synthase, putative, expressed
Seita.7G200100	black	no	1468.18	0.658793	AT2G45730.1	--	eukaryotic initiation factor 3 gamma subunit family protein	LOC_Os04g02150.2	--	tRNA methyltransferase, putative, expressed
Seita.9G400800	black	no	1314.51	0.654595	AT4G31790.1	--	Tetrapyrrole (Corrin/Porphyrin) Methylases	LOC_Os03g23970.2	--	diphthine synthase, putative, expressed
Seita.3G071100	black	no	1265.77	0.65355	AT2G39990.1	AteIF3f,EIF2,eIF3F	eukaryotic translation initiation factor 2	LOC_Os05g01450.1	--	eukaryotic translation initiation factor 3 subunit F, putative, expressed
Seita.3G263000	black	no	1328.32	0.652519	AT1G65290.1	mtACP2	mitochondrial acyl carrier protein 2	LOC_Os05g31290.1	--	acyl carrier protein, putative, expressed
Seita.7G306900	black	no	1259.66	0.651772	AT2G09990.1	--	Ribosomal protein S5 domain 2-like superfamily protein	LOC_Os12g03090.1	--	ribosomal protein, putative, expressed
Seita.6G113200	black	no	1358.25	0.651602	AT1G63660.1	--	GMP synthase (glutamine-hydrolyzing), putative / glutamine amidotransferase, putative	LOC_Os08g23730.1	--	class I glutamine amidotransferase, putative, expressed
Seita.9G315300	black	no	1518.33	0.651569	AT5G27640.1	ATEIF3B-1,ATTIF3B1,EIF3B,EIF3B-1,TIF3B1	translation initiation factor 3B1	LOC_Os10g41960.1	--	eukaryotic translation initiation factor 3 subunit B, putative, expressed
Seita.6G117100	black	no	1226.66	0.651521	AT4G11120.1	--	translation elongation factor Ts (EF-Ts), putative	LOC_Os12g35630.1	--	elongation factor TS family protein, expressed
Seita.8G114100	black	no	1393.6	0.650427	AT5G61970.1	--	signal recognition particle-related / SRP-related	LOC_Os08g23360.1	--	signal recognition particle 68 kDa protein, putative, expressed
Seita.4G271500	black	no	1494.5	0.649085	AT5G01230.1	--	S-adenosyl-L-methionine-dependent methyltransferases superfamily protein	LOC_Os06g49140.1	--	ribosomal RNA large subunit methyltransferase J, putative, expressed
Seita.2G299100	black	no	1582.55	0.648661	AT4G16444.1	--	--	LOC_Os06g09840.1	--	expressed protein
Seita.3G372800	black	no	1224.69	0.648462	--	--	--	--	--	--
Seita.1G284700	black	no	1410.92	0.648333	AT2G37190.1	--	Ribosomal protein L11 family protein	LOC_Os04g50990.1	--	L11 domain containing ribosomal protein, putative, expressed
Seita.1G002300	black	no	1403	0.647702	AT1G20580.1	--	Small nuclear ribonucleoprotein family protein	LOC_Os03g13760.1	--	LSM domain containing protein, expressed
Seita.9G325100	black	no	1521	0.64681	AT4G39235.1	--	--	LOC_Os08g10400.1	--	expressed protein
Seita.1G002100	black	no	1536.03	0.645586	AT1G64880.1	--	Ribosomal protein S5 family protein	LOC_Os02g01230.1	--	ribosomal protein, putative, expressed
Seita.2G411100	black	no	1692.25	0.64557	AT5G40660.1	--	ATP12 protein-related	LOC_Os07g44940.1	--	ATP12 ATPase, putative, expressed
Seita.3G154300	black	no	1402.83	0.644809	AT1G70190.1	--	Ribosomal protein L7/L12, oligomerisation;Ribosomal protein L7/L12, C-terminal/adaptor protein ClpS-like	LOC_Os05g48050.1	--	ribosomal protein L7/L12 C-terminal domain containing protein, expressed
Seita.8G024900	black	no	1426.7	0.644691	AT5G23535.1	--	KOW domain-containing protein	LOC_Os11g04370.1	--	ribosomal protein L24, putative, expressed
Seita.8G022000	black	no	1437.87	0.643111	AT1G27400.1	--	Ribosomal protein L22p/L17e family protein	LOC_Os09g08430.1	--	ribosomal protein L22, putative, expressed
Seita.3G240200	black	no	1401.84	0.64191	AT5G36950.1	DegP10	DegP protease 10	LOC_Os05g34460.1	--	OsDegp7 - Putative Deg protease homologue, expressed
Seita.1G364300	black	no	1303.92	0.640724	AT5G38890.1	--	Nucleic acid-binding, OB-fold-like protein	LOC_Os02g57070.1	--	3-5 exoribonuclease CSL4, putative, expressed
Seita.3G235600	black	no	1524.61	0.639448	AT2G40700.1	--	P-loop containing nucleoside triphosphate hydrolases superfamily protein	LOC_Os05g01990.1	--	DEAD-box ATP-dependent RNA helicase, putative, expressed
Seita.1G032400	black	no	1742.77	0.639046	AT3G04680.1	CLPS3	CLP-similar protein 3	LOC_Os02g12570.1	--	pre-mRNA cleavage complex II protein Clp1, putative, expressed
Seita.3G185000	black	no	1683.9	0.638856	AT5G09500.1	--	Ribosomal protein S19 family protein	LOC_Os07g08660.1	--	40S ribosomal protein S15, putative, expressed
Seita.9G178100	black	no	1379.74	0.637558	AT3G11710.1	ATKRS-1	lysyl-tRNA synthetase 1	LOC_Os03g38980.1	--	tRNA synthetases class II domain containing protein, expressed
Seita.1G356000	black	no	1231.52	0.637113	AT4G29390.1	--	Ribosomal protein S30 family protein	LOC_Os06g07580.2	--	expressed protein
Seita.5G211400	black	no	1235.58	0.63705	AT4G23620.1	--	Ribosomal protein L25/Gln-tRNA synthetase, anti-codon-binding domain	LOC_Os05g18750.1	--	ribosomal protein L25, putative, expressed
Seita.5G008800	black	no	1345.17	0.634794	AT5G25757.1	--	RNA polymerase I-associated factor PAF67	LOC_Os01g12870.1	--	eukaryotic translation initiation factor 3 subunit E-interacting protein, putative, expressed
Seita.2G133700	black	no	1089.99	0.633109	AT2G36170.1	--	Ubiquitin supergroup;Ribosomal protein L40e	LOC_Os09g39500.1	--	ubiquitin fusion protein, putative, expressed
Seita.9G442600	black	no	1522.77	0.632621	AT4G14145.1	--	--	LOC_Os03g17910.1	--	kinesin like protein, putative, expressed
Seita.2G186700	black	no	1568.11	0.631431	AT5G56900.2	--	CwfJ-like family protein / zinc finger (CCCH-type) family protein	LOC_Os09g19940.1	--	cwfJ-like family protein, putative, expressed
Seita.2G084800	black	no	1281.35	0.63004	AT2G36620.1	RPL24A	ribosomal protein L24	LOC_Os07g12250.1	--	ribosomal protein L24, putative, expressed
Seita.2G378600	black	no	1554.98	0.629272	AT1G26460.1	--	Tetratricopeptide repeat (TPR)-like superfamily protein	LOC_Os07g40800.1	--	PPR repeat domain containing protein, putative, expressed
Seita.5G414400	black	no	1430.35	0.628839	AT3G01790.1	--	Ribosomal protein L13 family protein	LOC_Os08g06474.1	--	ribosomal protein L13, putative, expressed
Seita.3G271200	black	no	1422.49	0.628393	AT3G62810.1	--	complex 1 family protein / LVR family protein	LOC_Os05g30030.1	--	expressed protein
Seita.1G227600	black	no	1577.84	0.627547	AT2G31810.1	--	ACT domain-containing small subunit of acetolactate synthase protein	LOC_Os02g39570.4	--	ACT domain containing protein, expressed
Seita.5G029300	black	no	1616.52	0.627371	AT5G64670.1	--	Ribosomal protein L18e/L15 superfamily protein	LOC_Os08g21840.1	--	50S ribosomal protein L15, putative, expressed
Seita.1G283400	black	no	1554.43	0.625689	AT5G16930.1	--	AAA-type ATPase family protein	LOC_Os02g46990.1	--	AAA-type ATPase family protein, putative, expressed
Seita.4G032700	black	no	1843.13	0.625246	AT3G11400.1	ATEIF3G1,EIF3G1	eukaryotic translation initiation factor 3G1	LOC_Os02g54700.2	--	RNA recognition motif containing protein, putative, expressed
Seita.7G247900	black	no	1501.41	0.625037	AT3G21820.1	ATXR2,SDG36	histone-lysine N-methyltransferase ATXR2	LOC_Os04g53700.1	--	zinc finger protein, putative, expressed
Seita.4G052500	black	no	1309.83	0.621887	AT3G20050.1	ATTCP-1,TCP-1	T-complex protein 1 alpha subunit	LOC_Os04g46620.1	--	T-complex protein, putative, expressed
Seita.2G400200	black	no	1320.94	0.621406	AT5G39850.1	--	Ribosomal protein S4	LOC_Os11g38959.1	--	40S ribosomal protein S9-2, putative, expressed
Seita.9G115000	black	no	1455.4	0.620547	AT1G02410.1	--	cytochrome c oxidase assembly protein CtaG / Cox11 family	LOC_Os03g50940.1	--	cytochrome c oxidase assembly protein COX11, mitochondrial precursor, putative, expressed
Seita.1G080200	black	no	1297.16	0.620512	AT3G08950.1	--	electron transport SCO1/SenC family protein	LOC_Os02g06480.2	--	SCO1 protein homolog, mitochondrial precursor, putative, expressed
Seita.9G006500	black	no	1321.79	0.617613	AT2G44510.1	--	CDK inhibitor P21 binding protein	LOC_Os03g63690.1	--	BCCIP, putative, expressed
Seita.9G183600	black	no	1481.03	0.616552	AT1G11650.2	ATRBP45B,RBP45B	RNA-binding (RRM/RBD/RNP motifs) family protein	LOC_Os03g37270.1	--	RNA recognition motif containing protein, putative, expressed
Seita.3G066100	black	no	1499.76	0.614705	AT5G59410.1	--	Rab5-interacting family protein	LOC_Os05g01994.1	--	rab5-interacting protein like, putative, expressed
Seita.2G181900	black	no	1399.15	0.613678	AT3G16780.1	--	Ribosomal protein L19e family protein	LOC_Os03g38260.1	--	60S ribosomal protein L19-3, putative, expressed
Seita.5G465700	black	no	1613.17	0.613621	AT2G47640.2	--	Small nuclear ribonucleoprotein family protein	LOC_Os05g24970.1	--	LSM domain containing protein, expressed
Seita.8G085600	black	no	1292.73	0.612015	AT2G34480.1	--	Ribosomal protein L18ae/LX family protein	LOC_Os05g49030.1	--	60S ribosomal protein L18a, putative, expressed
Seita.4G018800	black	no	1806.22	0.611889	AT1G60770.1	--	Tetratricopeptide repeat (TPR)-like superfamily protein	LOC_Os04g25410.1	--	pentatricopeptide repeat domain containing protein, putative, expressed
Seita.2G319400	black	no	1149.45	0.61033	AT1G07770.1	RPS15A	ribosomal protein S15A	LOC_Os02g27760.1	--	40S ribosomal protein S15a, putative, expressed
Seita.J022400	black	no	1469.31	0.609538	AT1G56070.1	LOS1	Ribosomal protein S5/Elongation factor G/III/V family protein	LOC_Os02g32030.1	--	elongation factor, putative, expressed
Seita.6G124400	black	no	1435.39	0.608772	AT4G02450.1	--	HSP20-like chaperones superfamily protein	LOC_Os08g27070.1	--	co-chaperone protein SBA1, putative, expressed
Seita.5G307800	black	no	1340.81	0.607328	AT1G16740.1	--	Ribosomal protein L20	LOC_Os05g45220.1	--	50S ribosomal protein L20, putative, expressed
Seita.9G525800	black	no	1187.8	0.606802	AT1G26740.1	--	Ribosomal L32p protein family	LOC_Os03g07290.1	--	structural constituent of ribosome, putative, expressed
Seita.7G165800	black	no	1724.73	0.606627	AT3G08947.1	--	ARM repeat superfamily protein	LOC_Os05g28510.1	--	importin subunit beta, putative, expressed
Seita.7G162800	black	no	1435.01	0.60575	AT4G13330.1	--	S-adenosyl-L-methionine-dependent methyltransferases superfamily protein	LOC_Os04g43164.1	--	expressed protein
Seita.5G375300	black	no	1207.8	0.605182	AT5G64650.1	--	Ribosomal protein L17 family protein	LOC_Os01g62210.1	--	50S ribosomal protein L17, putative, expressed
Seita.3G013300	black	no	1411.08	0.604513	AT1G31660.1	--	--	LOC_Os09g18320.1	--	bystin, putative, expressed
Seita.3G155500	black	no	1321.48	0.603667	AT1G18080.1	ATARCA,RACK1A,RACK1A_AT	Transducin/WD40 repeat-like superfamily protein	LOC_Os01g49290.1	--	WD repeat-containing protein, putative, expressed
Seita.1G229700	black	no	1312.32	0.603597	AT1G19520.1	NFD5	pentatricopeptide (PPR) repeat-containing protein	LOC_Os02g39820.1	--	PPR repeat domain containing protein, putative, expressed
Seita.5G201700	black	no	1600.13	0.601909	AT4G26240.1	--	--	LOC_Os01g37850.1	--	expressed protein
Seita.1G046600	black	no	1639.95	0.60147	AT3G06040.1	--	Ribosomal protein L12/ ATP-dependent Clp protease adaptor protein ClpS family protein	LOC_Os02g10540.1	--	ribosomal protein L7/L12 C-terminal domain containing protein, expressed
Seita.3G177500	black	no	1352.2	0.599862	AT5G14105.1	--	--	LOC_Os05g44160.1	--	expressed protein
Seita.9G450300	black	no	1337.8	0.599625	AT2G37510.1	--	RNA-binding (RRM/RBD/RNP motifs) family protein	LOC_Os03g17060.1	--	RNA recognition motif containing protein, putative, expressed
Seita.9G501100	black	no	1431.63	0.597869	AT2G18410.1	--	--	LOC_Os03g10460.1	--	expressed protein
Seita.2G240300	black	no	1461.15	0.596207	AT2G22400.1	--	S-adenosyl-L-methionine-dependent methyltransferases superfamily protein	LOC_Os09g29630.1	--	NOL1/NOP2/sun family protein, putative, expressed
Seita.9G091200	black	no	1543.45	0.595246	AT3G58470.1	--	nucleic acid binding;methyltransferases	LOC_Os03g53890.1	--	N2, N2-dimethylguanosine tRNA methyltransferase, putative, expressed
Seita.4G239100	black	no	1338.36	0.595224	AT1G24510.1	--	TCP-1/cpn60 chaperonin family protein	LOC_Os06g36700.1	--	T-complex protein, putative, expressed
Seita.4G055700	black	no	1577.22	0.595012	AT4G14145.1	--	--	LOC_Os03g17910.1	--	kinesin like protein, putative, expressed
Seita.5G275300	black	no	1316.22	0.592889	AT1G18080.1	ATARCA,RACK1A,RACK1A_AT	Transducin/WD40 repeat-like superfamily protein	LOC_Os01g49290.1	--	WD repeat-containing protein, putative, expressed
Seita.9G217100	black	no	1310.34	0.592117	AT3G46560.1	emb2474,TIM9	Tim10/DDP family zinc finger protein	LOC_Os12g38310.1	--	mitochondrial import inner membrane translocase subunit Tim, putative, expressed
Seita.1G099300	black	no	1345.24	0.591579	AT2G14880.1	--	SWIB/MDM2 domain superfamily protein	LOC_Os02g03730.1	--	SWIB/MDM2 domain containing protein, expressed
Seita.2G143100	black	no	1235.79	0.590955	AT3G46630.1	--	Protein of unknown function (DUF3223)	LOC_Os08g21700.1	--	DCL, chloroplast precursor, putative, expressed
Seita.3G305300	black	no	1236.92	0.590714	--	--	--	--	--	--
Seita.1G130800	black	no	1288.84	0.590367	AT3G57000.1	--	nucleolar essential protein-related	LOC_Os02g18830.1	--	ribosome biogenesis protein NEP1, putative, expressed
Seita.3G330100	black	no	1706.98	0.58856	AT4G36130.1	--	Ribosomal protein L2 family	LOC_Os12g38000.1	--	60S ribosomal protein L8, putative, expressed
Seita.2G094700	black	no	1071.67	0.588425	AT2G29530.1	TIM10	Tim10/DDP family zinc finger protein	LOC_Os03g61019.1	--	mitochondrial import inner membrane translocase subunit Tim, putative, expressed
Seita.3G186100	black	no	1382.23	0.587965	AT3G23620.1	--	Ribosomal RNA processing Brix domain protein	LOC_Os01g33030.1	--	Brix domain containing protein, putative, expressed
Seita.1G329300	black	no	1336.66	0.587922	AT4G39280.2	--	phenylalanyl-tRNA synthetase, putative / phenylalanine--tRNA ligase, putative	LOC_Os10g26130.1	--	phenylalanyl-tRNA synthetase, putative, expressed
Seita.4G223700	black	no	1317.94	0.587741	AT2G34160.1	--	Alba DNA/RNA-binding protein	LOC_Os06g40040.1	--	protein of unknown function domain containing protein, expressed
Seita.6G112200	black	no	1708.85	0.587426	AT3G13224.2	--	RNA-binding (RRM/RBD/RNP motifs) family protein	LOC_Os08g23120.1	--	RNA recognition motif containing protein, putative, expressed
Seita.5G431500	black	no	1521.58	0.586822	AT1G27390.1	TOM20-2	translocase outer membrane 20-2	LOC_Os01g69250.1	--	mitochondrial import receptor subunit TOM20, putative, expressed
Seita.1G373500	black	no	1154.66	0.585416	--	--	--	--	--	--
Seita.7G172600	black	no	1630.67	0.581639	AT2G37860.3	LCD1	Protein of unknown function (DUF3411)	LOC_Os04g44290.1	--	expressed protein
Seita.3G277800	black	no	1232.08	0.577542	AT3G51800.3	ATEBP1,ATG2,EBP1	metallopeptidase M24 family protein	LOC_Os05g28280.1	--	peptidase, M24 family protein, putative, expressed
Seita.5G218700	black	no	1451.04	0.575907	AT1G14990.1	--	--	LOC_Os01g42120.1	--	expressed protein
Seita.6G250100	black	no	1226.06	0.575871	AT3G23940.1	--	dehydratase family	LOC_Os08g44530.1	--	dihydroxy-acid dehydratase, putative, expressed
Seita.4G131300	black	no	1397.91	0.574762	AT1G14620.1	DECOY	decoy	LOC_Os06g19640.1	--	39S ribosomal protein L46, mitochondrial precursor, putative, expressed
Seita.1G291300	black	no	1289.33	0.574142	AT5G20570.1	ATRBX1,HRT1,RBX1,ROC1	RING-box 1	LOC_Os02g47870.1	--	anaphase-promoting complex subunit 11, putative, expressed
Seita.9G124100	black	no	1328.15	0.572536	AT2G17900.1	SDG37	SET domain group 37	LOC_Os03g49730.2	--	zinc finger protein, putative, expressed
Seita.9G442800	black	no	1287.71	0.572203	AT1G07960.3	ATPDIL5-1,PDIL5-1	PDI-like 5-1	LOC_Os03g17860.1	--	OsPDIL5-1 protein disulfide isomerase PDIL5-1, expressed
Seita.3G028800	black	no	1657.5	0.571099	AT5G55280.1	ATFTSZ1-1,CPFTSZ,FTSZ1-1	homolog of bacterial cytokinesis Z-ring protein FTSZ 1-1	LOC_Os04g56970.2	--	tubulin/FtsZ domain containing protein, putative, expressed
Seita.5G071200	black	no	1304.29	0.570749	AT5G60030.1	--	--	LOC_Os01g01670.1	--	expressed protein
Seita.2G143900	black	no	1763.77	0.57061	ATMG00560.1	--	Nucleic acid-binding, OB-fold-like protein	LOC_Os12g38000.1	--	60S ribosomal protein L8, putative, expressed
Seita.5G465300	black	no	1324.72	0.57039	AT1G51980.1	--	Insulinase (Peptidase family M16) protein	LOC_Os01g73550.1	--	mitochondrial-processing peptidase subunit alpha, mitochondrial precursor, putative, expressed
Seita.9G462100	black	no	1432.7	0.570257	AT5G15810.1	--	N2,N2-dimethylguanosine tRNA methyltransferase	LOC_Os03g57280.1	--	N-dimethylguanosine tRNA methyltransferase, putative, expressed
Seita.9G489600	black	no	1561.77	0.570024	AT5G65560.1	--	Pentatricopeptide repeat (PPR) superfamily protein	LOC_Os03g11690.1	--	PPR repeat containing protein, expressed
Seita.2G076600	black	no	1266.89	0.568899	AT1G16870.1	--	mitochondrial 28S ribosomal protein S29-related	LOC_Os07g10300.2	--	expressed protein
Seita.9G007400	black	no	1090.55	0.567842	AT1G73940.1	--	--	LOC_Os03g63550.1	--	expressed protein
Seita.4G031000	black	no	1271.51	0.567048	AT1G04870.2	ATPRMT10,PRMT10	protein arginine methyltransferase 10	LOC_Os06g05090.1	--	methyltransferase domain containing protein, expressed
Seita.3G268400	black	no	1096.29	0.563481	AT5G58420.1	--	Ribosomal protein S4 (RPS4A) family protein	LOC_Os05g30530.1	--	40S ribosomal protein S4, putative, expressed
Seita.5G129000	black	no	1297.03	0.562255	AT5G26830.1	--	Threonyl-tRNA synthetase	LOC_Os08g19850.1	--	threonyl-tRNA synthetase, mitochondrial precursor, putative, expressed
Seita.5G328500	black	no	1489.27	0.559746	AT1G69380.1	--	Protein of unknown function (DUF155)	LOC_Os01g55860.1	--	expressed protein
Seita.4G193100	black	no	1210.61	0.559471	AT2G43770.1	--	Transducin/WD40 repeat-like superfamily protein	LOC_Os06g44370.1	--	WD domain, G-beta repeat domain containing protein, expressed
Seita.7G312900	black	no	1427.61	0.559096	AT5G09225.1	--	--	LOC_Os11g04174.1	--	expressed protein
Seita.5G064700	black	no	1187.57	0.55652	AT5G61330.1	--	rRNA processing protein-related	LOC_Os01g34200.1	--	AATF, putative, expressed
Seita.6G051200	black	no	1269.03	0.55649	AT4G19350.1	EMB3006	embryo defective 3006	LOC_Os08g06520.1	--	expressed protein
Seita.5G462400	black	no	1760.05	0.556379	AT4G25740.1	--	RNA binding Plectin/S10 domain-containing protein	LOC_Os01g73160.1	--	40S ribosomal protein S10, putative, expressed
Seita.8G113000	black	no	1654.21	0.554426	AT2G41670.1	--	P-loop containing nucleoside triphosphate hydrolases superfamily protein	LOC_Os11g26030.1	--	GTPase of unknown function domain containing protein, putative, expressed
Seita.5G427200	black	no	1159.77	0.551801	AT5G27990.1	--	Pre-rRNA-processing protein TSR2, conserved region	LOC_Os08g39820.1	--	pre-rRNA-processing protein TSR2, putative, expressed
Seita.5G354400	black	no	1348.86	0.551291	AT3G60360.1	EDA14,UTP11	embryo sac development arrest 14	LOC_Os01g59500.1	--	U3 small nucleolar RNA-associated protein 11, putative, expressed
Seita.5G206900	black	no	1317.13	0.551207	AT3G13882.1	--	Ribosomal protein L34	LOC_Os01g39010.1	--	50S ribosomal protein, putative, expressed
Seita.7G131900	black	no	1508.52	0.550265	AT3G15660.2	ATGRX4,GRX4	glutaredoxin 4	LOC_Os01g34620.5	--	OsGrx_S15.1 - glutaredoxin subgroup II, expressed
Seita.2G188500	black	no	1075.84	0.54867	AT4G39740.1	--	Thioredoxin superfamily protein	LOC_Os09g20430.1	--	SCO1 protein homolog, mitochondrial precursor, putative, expressed
Seita.2G413400	black	no	1132.19	0.546963	AT5G27395.1	--	Mitochondrial inner membrane translocase complex, subunit Tim44-related protein	LOC_Os07g45300.1	--	tim44-like domain containing protein, expressed
Seita.2G083900	black	no	1303.88	0.546665	AT1G80270.1	PPR596	PENTATRICOPEPTIDE REPEAT 596	LOC_Os07g12140.1	--	PPR repeat domain containing protein, putative, expressed
Seita.3G359300	black	no	1530.14	0.546044	AT5G55610.1	--	--	LOC_Os12g31490.1	--	expressed protein
Seita.2G274700	black	no	1188.56	0.545627	AT3G59540.1	--	Ribosomal L38e protein family	LOC_Os11g24610.1	--	60S ribosomal protein L38, putative, expressed
Seita.5G391000	black	no	1332.13	0.545544	AT5G06140.1	ATSNX1,SNX1	sorting nexin 1	LOC_Os01g64280.1	--	sorting nexin 1, putative, expressed
Seita.2G353100	black	no	1287.37	0.544617	AT4G27380.1	--	--	LOC_Os07g37570.1	--	expressed protein
Seita.1G046000	black	no	1303.71	0.544553	AT1G45000.1	--	AAA-type ATPase family protein	LOC_Os02g10640.1	--	26S protease regulatory subunit, putative, expressed
Seita.3G257000	black	no	1324.81	0.543726	AT5G48870.1	SAD1	Small nuclear ribonucleoprotein family protein	LOC_Os05g32310.1	--	LSM domain containing protein, expressed
Seita.8G075200	black	no	1192.87	0.542333	AT1G05730.1	--	Eukaryotic protein of unknown function (DUF842)	LOC_Os11g14990.1	--	expressed protein
Seita.5G129300	black	no	1435.4	0.541384	AT2G36960.3	TKI1	TSL-kinase interacting protein 1	LOC_Os01g08680.1	--	myb/SANT domain protein, putative, expressed
Seita.1G014600	black	no	1358.52	0.540606	AT3G23620.1	--	Ribosomal RNA processing Brix domain protein	LOC_Os01g33030.1	--	Brix domain containing protein, putative, expressed
Seita.7G012400	black	no	1497.53	0.540249	AT5G26610.1	--	D111/G-patch domain-containing protein	LOC_Os04g02500.2	--	G-patch domain containing protein, expressed
Seita.4G158200	black	no	1331.71	0.539575	AT3G57520.1	AtSIP2,SIP2	seed imbibition 2	LOC_Os04g40520.1	--	uncharacterized glycosyltransferase, putative, expressed
Seita.6G057100	black	no	2071.21	0.538148	AT1G26880.1	--	Ribosomal protein L34e superfamily protein	LOC_Os08g06040.1	--	60S ribosomal protein L34, putative, expressed
Seita.2G210600	black	no	1705.13	0.537151	AT2G23890.1	--	HAD-superfamily hydrolase, subfamily IG, 5\'-nucleotidase	LOC_Os09g25640.1	--	5-nucleotidase domain-containing protein, putative, expressed
Seita.2G428300	black	no	1205.65	0.536595	AT5G06360.1	--	Ribosomal protein S8e family protein	LOC_Os07g47580.1	--	ribosomal protein, putative, expressed
Seita.3G095400	black	no	1312.01	0.53492	AT5G55390.1	EDM2	ENHANCED DOWNY MILDEW 2	LOC_Os12g12300.1	--	EDM2, putative, expressed
Seita.9G006200	black	no	1271.02	0.534282	AT3G46210.6	--	Ribosomal protein S5 domain 2-like superfamily protein	LOC_Os03g63720.1	--	exosome complex exonuclease, putative, expressed
Seita.9G501600	black	no	1277.47	0.532835	AT3G49890.1	--	--	LOC_Os03g10410.1	--	expressed protein
Seita.4G192900	black	no	1721.53	0.532739	AT5G50460.1	--	secE/sec61-gamma protein transport protein	LOC_Os02g08180.1	--	protein transport protein SEC61 subunit gamma, putative, expressed
Seita.3G319800	black	no	1045.16	0.53197	AT1G27435.1	--	--	--	--	--
Seita.2G389800	black	no	1266.11	0.530899	AT5G16950.1	--	--	LOC_Os06g08510.1	--	expressed protein
Seita.5G211100	black	no	1274.56	0.530197	AT1G79950.1	--	RAD3-like DNA-binding helicase protein	LOC_Os01g40980.1	--	helicase, putative, expressed
Seita.3G216800	black	no	1381.62	0.529998	AT2G31170.1	SYCO ARATH	Cysteinyl-tRNA synthetase, class Ia family protein	LOC_Os03g04960.1	--	cysteinyl-tRNA synthetase, putative, expressed
Seita.3G078100	black	no	1425.32	0.529537	AT1G16560.1	--	Per1-like family protein	LOC_Os05g13330.1	--	per1-like family protein, putative, expressed
Seita.2G417900	black	no	1261.88	0.529464	AT2G40010.1	--	Ribosomal protein L10 family protein	LOC_Os08g03640.1	--	60S acidic ribosomal protein P0, putative, expressed
Seita.5G389700	black	no	1493.23	0.528654	AT1G08360.1	--	Ribosomal protein L1p/L10e family	LOC_Os02g21660.1	--	L1P family of ribosomal proteins domain containing protein, expressed
Seita.8G203800	black	no	1335.72	0.527624	AT3G43980.1	--	Ribosomal protein S14p/S29e family protein	LOC_Os12g32380.1	--	40S ribosomal protein S29, putative, expressed
Seita.2G409000	black	no	1385.54	0.526548	AT2G26810.2	--	Putative methyltransferase family protein	LOC_Os07g44730.1	--	expressed protein
Seita.9G135700	black	no	1334.38	0.525805	AT1G27090.1	--	glycine-rich protein	LOC_Os03g48260.1	--	expressed protein
Seita.3G114400	black	no	1299.58	0.52239	AT3G04710.1	--	ankyrin repeat family protein	LOC_Os05g01310.1	--	ankyrin repeat family protein, putative, expressed
Seita.4G235000	black	no	1522.8	0.522214	AT1G09640.1	--	Translation elongation factor EF1B, gamma chain	LOC_Os06g37440.1	--	elongation factor 1-gamma, putative, expressed
Seita.9G508900	black	no	1136.23	0.522183	AT2G33220.1	--	GRIM-19 protein	LOC_Os03g09210.1	--	NADH dehydrogenase 1 alpha subcomplex subunit 13, putative, expressed
Seita.9G082100	black	no	1631.88	0.521376	AT5G65860.2	--	ankyrin repeat family protein	LOC_Os03g55330.1	--	ankyrin repeat domain containing protein, putative, expressed
Seita.1G023800	black	no	1271.51	0.521361	AT1G26910.1	RPL10B	Ribosomal protein L16p/L10e family protein	LOC_Os11g11390.1	--	ribosomal protein, putative, expressed
Seita.9G066900	black	no	1141.31	0.521095	AT4G31300.3	PBA1	N-terminal nucleophile aminohydrolases (Ntn hydrolases) superfamily protein	LOC_Os06g04800.1	--	peptidase, T1 family, putative, expressed
Seita.5G358600	black	no	1134.37	0.520849	AT2G36620.1	RPL24A	ribosomal protein L24	LOC_Os01g59990.2	--	ribosomal protein L24, putative, expressed
Seita.3G185900	black	no	1043.98	0.52005	AT3G59540.1	--	Ribosomal L38e protein family	LOC_Os11g24610.1	--	60S ribosomal protein L38, putative, expressed
Seita.9G497600	black	no	1255.56	0.517823	AT3G59650.1	--	mitochondrial ribosomal protein L51/S25/CI-B8 family protein	LOC_Os03g10930.1	--	ribosomal protein L51, putative, expressed
Seita.4G280600	black	no	1756.66	0.517208	AT2G21160.1	--	Translocon-associated protein (TRAP), alpha subunit	LOC_Os06g50154.1	--	translocon-associated protein subunit alpha precursor, putative, expressed
Seita.2G304100	black	no	1411.14	0.516789	--	--	--	LOC_Os09g38400.1	--	prostatic spermine-binding protein precursor, putative, expressed
Seita.9G152600	black	no	1622.47	0.516131	AT1G28760.1	--	Uncharacterized conserved protein (DUF2215)	LOC_Os03g45180.1	--	expressed protein
Seita.9G521400	black	no	1161.56	0.51462	AT3G57610.1	ADSS	adenylosuccinate synthase	LOC_Os03g07840.1	--	adenylosuccinate synthetase, chloroplast precursor, putative, expressed
Seita.3G021100	black	no	1403.83	0.512297	AT1G71230.1	AJH2,CSN5,CSN5B	COP9-signalosome 5B	LOC_Os04g56070.1	--	COP9 signalosome complex subunit 5b, putative, expressed
Seita.2G344700	black	no	992.215	0.512279	AT3G59540.1	--	Ribosomal L38e protein family	LOC_Os11g24610.1	--	60S ribosomal protein L38, putative, expressed
Seita.1G290000	black	no	1344.24	0.510096	AT2G18330.1	--	AAA-type ATPase family protein	LOC_Os02g47760.1	--	AAA-type ATPase family protein, putative, expressed
Seita.2G386600	black	no	1694.61	0.509916	AT2G18110.1	--	Translation elongation factor EF1B/ribosomal protein S6 family protein	LOC_Os07g42300.1	--	elongation factor protein, putative, expressed
Seita.2G385900	black	no	1248.97	0.509527	AT4G01590.3	--	--	LOC_Os07g42080.1	--	expressed protein
Seita.7G153300	black	no	1320.17	0.509017	AT4G32720.1	AtLa1,La1	La protein 1	LOC_Os04g42010.1	--	RNA binding protein, putative, expressed
Seita.1G203200	black	no	1595.05	0.508492	AT1G47500.1	ATRBP47C\',RBP47C\'	RNA-binding protein 47C\'	LOC_Os04g37690.1	--	RNA recognition motif containing protein, putative, expressed
Seita.1G081200	black	no	1407.86	0.506768	AT3G11830.1	--	TCP-1/cpn60 chaperonin family protein	LOC_Os06g47320.1	--	T-complex protein, putative, expressed
Seita.8G198800	black	no	1298.1	0.505848	AT1G53530.1	--	Peptidase S24/S26A/S26B/S26C family protein	LOC_Os11g40500.3	--	OsSigP7 - Putative Type I Signal Peptidase homologue; employs a putative Ser/Lys catalytic dyad, expressed
Seita.9G504600	black	no	1392.83	0.503369	AT5G42970.1	ATS4,COP14,COP8,CSN4,EMB134,FUS4,FUS8	Proteasome component (PCI) domain protein	LOC_Os03g10120.2	--	proteasome subunit, putative, expressed
Seita.1G231100	black	no	1177.76	0.502892	AT3G48930.1	EMB1080	Nucleic acid-binding, OB-fold-like protein	LOC_Os04g42380.1	--	ribosomal protein S17, putative, expressed
Seita.3G048000	black	no	1062.72	0.502717	AT3G51010.1	--	--	LOC_Os05g03540.1	--	expressed protein
Seita.6G208300	black	no	1398.61	0.499931	AT2G33585.1	--	--	LOC_Os08g40190.1	--	expressed protein
Seita.1G055400	black	no	1183.33	0.499666	AT2G40780.1	--	Nucleic acid-binding, OB-fold-like protein	LOC_Os03g02310.1	--	RNA binding protein, putative, expressed
Seita.6G007400	black	no	1288.05	0.499321	AT1G43860.1	--	sequence-specific DNA binding transcription factors	LOC_Os08g01620.2	--	shwachman-Bodian-Diamond syndrome protein, putative, expressed
Seita.7G051000	black	no	1050.41	0.499084	AT5G15220.1	--	Ribosomal protein L27 family protein	LOC_Os08g31219.1	--	ribosomal protein L27, putative, expressed
Seita.1G205400	black	no	1205.15	0.498947	AT4G39860.1	--	--	LOC_Os02g36500.1	--	expressed protein
Seita.4G158700	black	no	1065.31	0.498686	AT1G48160.1	--	signal recognition particle 19 kDa protein, putative / SRP19, putative	LOC_Os06g23430.2	--	signal recognition particle 19 kDa protein, putative, expressed
Seita.1G027500	black	no	1089.16	0.49733	AT5G11630.1	--	--	LOC_Os02g13630.1	--	expressed protein
Seita.3G006700	black	no	1182.08	0.496924	AT1G49170.1	--	Protein of unknown function (DUF167)	LOC_Os04g58970.1	--	uncharacterized ACR, YggU family COG1872 containing protein, expressed
Seita.3G017000	black	no	1554.15	0.496806	AT1G34130.1	STT3B	staurosporin and temperature sensitive 3-like b	LOC_Os04g57890.1	--	oligosaccharyl transferase, putative, expressed
Seita.7G333600	black	no	1277.93	0.496713	AT1G25260.1	--	Ribosomal protein L10 family protein	LOC_Os11g01420.1	--	ribosomal protein L10, putative, expressed
Seita.9G305700	black	no	1342.83	0.496457	AT5G45590.1	--	Ribosomal protein L35	LOC_Os10g42860.1	--	ribosomal protein L35, putative, expressed
Seita.4G281900	black	no	1247.53	0.496403	AT1G47820.2	--	--	LOC_Os06g50350.1	--	expressed protein
Seita.8G096900	black	no	1293.87	0.496174	AT3G48480.1	--	Cysteine proteinases superfamily protein	LOC_Os11g10780.1	--	expressed protein
Seita.4G274500	black	no	1220.76	0.495317	AT2G29960.1	ATCYP5,CYP19-4,CYP5	cyclophilin 5	LOC_Os06g49480.2	--	peptidyl-prolyl cis-trans isomerase, putative, expressed
Seita.9G210300	black	no	1686.99	0.494933	AT3G54710.1	ATCDT1B,CDT1,CDT1B	homolog of yeast CDT1 B homolog of yeast CDT1 B	LOC_Os10g34820.1	--	CDT1B - Putative DNA replication initiation protein, expressed
Seita.7G051100	black	no	1670.85	0.494322	AT4G10710.1	SPT16	global transcription factor C	LOC_Os04g25550.1	--	FACT complex subunit SPT16, putative, expressed
Seita.2G312800	black	no	1236.69	0.494034	AT4G07390.1	--	Mannose-P-dolichol utilization defect 1 protein	LOC_Os07g29610.1	--	PQ loop repeat domain containing protein, expressed
Seita.9G028600	black	no	1521.59	0.493578	AT3G09090.1	DEX1	defective in exine formation protein (DEX1)	LOC_Os03g61050.1	--	FG-GAP repeat-containing protein, putative, expressed
Seita.5G338900	black	no	1626.66	0.492407	AT1G27060.1	--	Regulator of chromosome condensation (RCC1) family protein	LOC_Os01g56990.1	--	Regulator of chromosome condensation domain containing protein, expressed
Seita.1G138500	black	no	1498.88	0.491768	AT5G41760.1	--	Nucleotide-sugar transporter family protein	LOC_Os06g33210.1	--	UAA transporter family domain containing protein, expressed
Seita.1G059900	black	no	1191.51	0.491466	--	--	--	LOC_Os02g09140.1	--	bfr-2, putative, expressed
Seita.4G158600	black	no	1339.06	0.49146	AT2G04520.1	--	Nucleic acid-binding, OB-fold-like protein	LOC_Os06g23440.1	--	eukaryotic translation initiation factor 1A, putative, expressed
Seita.2G142600	black	no	1524.39	0.490737	AT3G12270.1	ATPRMT3,PRMT3	protein arginine methyltransferase 3	LOC_Os07g44640.1	--	ZOS7-13 - C2H2 zinc finger protein, expressed
Seita.9G215000	black	no	1237.12	0.490512	AT4G15900.1	PRL1	pleiotropic regulatory locus 1	LOC_Os03g21990.1	--	WD domain, G-beta repeat domain containing protein, expressed
Seita.2G124700	black	no	1198.31	0.490311	AT5G17270.1	--	Protein prenylyltransferase superfamily protein	LOC_Os07g27180.1	--	tetratricopeptide repeat domain containing protein, expressed
Seita.6G207600	black	no	1353.7	0.489275	AT5G12210.1	AtRGTB1,RGTB1	RAB geranylgeranyl transferase beta subunit 1	LOC_Os08g40140.1	--	geranylgeranyl transferase type-2 subunit beta, putative, expressed
Seita.5G310500	black	no	1357.41	0.48915	AT1G70350.1	--	--	LOC_Os01g53620.1	--	expressed protein
Seita.3G011000	black	no	1265.61	0.486692	AT4G25550.1	--	Cleavage/polyadenylation specificity factor, 25kDa subunit	LOC_Os04g58640.1	--	cleavage and polyadenylation specificity factor subunit 5, putative, expressed
Seita.2G195400	black	no	1305.34	0.486185	AT2G19560.1	EER5	proteasome family protein	LOC_Os09g21760.1	--	proteasome subunit, putative, expressed
Seita.9G210100	black	no	960.128	0.485199	AT3G07910.1	--	--	--	--	--
Seita.3G119600	black	no	1180.6	0.485017	AT1G65700.3	--	Small nuclear ribonucleoprotein family protein	LOC_Os05g51650.1	--	LSM domain containing protein, expressed
Seita.3G270100	black	no	1597.88	0.48398	AT3G59670.1	--	--	LOC_Os05g30340.2	--	expressed protein
Seita.6G080400	black	no	1078.7	0.482434	AT4G39300.2	--	--	LOC_Os01g37090.1	--	expressed protein
Seita.3G326600	black	no	1244.28	0.481388	AT3G46560.1	emb2474,TIM9	Tim10/DDP family zinc finger protein	LOC_Os12g38310.1	--	mitochondrial import inner membrane translocase subunit Tim, putative, expressed
Seita.2G420600	black	no	1421.39	0.479855	AT4G30890.3	UBP24	ubiquitin-specific protease 24	LOC_Os07g46660.2	--	ubiquitin carboxyl-terminal hydrolase domain containing protein, expressed
Seita.7G161000	black	no	1159.72	0.479823	AT5G01350.1	--	--	LOC_Os04g42910.1	--	expressed protein
Seita.4G220800	black	no	1275.68	0.479749	AT1G45000.1	--	AAA-type ATPase family protein	LOC_Os06g40560.1	--	26S protease regulatory subunit S10B, putative, expressed
Seita.4G249700	black	no	1308.69	0.479559	AT4G31420.1	--	Zinc finger protein 622	LOC_Os06g47840.1	--	ZOS6-08 - C2H2 zinc finger protein, expressed
Seita.4G095500	black	no	1245.31	0.477112	AT5G07900.1	--	Mitochondrial transcription termination factor family protein	LOC_Os06g12080.1	--	mTERF family protein, expressed
Seita.9G547300	black	no	1358.41	0.476552	AT5G57490.1	ATVDAC4,VDAC4	voltage dependent anion channel 4	LOC_Os03g04460.1	--	outer mitochondrial membrane porin, putative, expressed
Seita.5G172800	black	no	1064.68	0.476044	AT4G39300.2	--	--	LOC_Os01g37090.1	--	expressed protein
Seita.9G017700	black	no	1093.12	0.475768	AT1G03860.3	ATPHB2,PHB2	prohibitin 2	LOC_Os03g62490.1	--	prohibitin-2, putative, expressed
Seita.9G502300	black	no	1294.97	0.474961	AT3G17910.1	SURF1	Surfeit locus 1 cytochrome c oxidase biogenesis protein	LOC_Os03g10360.1	--	SURF1, putative, expressed
Seita.9G490200	black	no	1119.41	0.474549	AT4G13780.1	--	methionine--tRNA ligase, putative / methionyl-tRNA synthetase, putative / MetRS, putative	LOC_Os06g31210.1	--	methionyl-tRNA synthetase, putative, expressed
Seita.6G229800	black	no	1273.57	0.47444	AT4G35450.2	AFT,AKR2,AKR2A	ankyrin repeat-containing protein 2	LOC_Os09g33810.2	--	ankyrin repeat domain containing protein, putative, expressed
Seita.5G046400	black	no	1346.05	0.472933	AT5G63000.1	--	Mitochondrial import inner membrane translocase subunit Tim17/Tim22/Tim23 family protein	LOC_Os01g16510.1	--	expressed protein
Seita.5G459600	black	no	1304.83	0.472692	AT2G28480.1	--	RNA-binding CRS1 / YhbY (CRM) domain protein	LOC_Os01g72820.2	--	CRS1/YhbY domain containing protein, putative, expressed
Seita.1G238900	black	no	1058.43	0.472333	AT2G33470.2	ATGLTP1,GLTP1	glycolipid transfer protein 1	LOC_Os07g26460.1	--	GLTP domain containing protein, putative, expressed
Seita.7G285900	black	no	1082.52	0.471621	AT4G34720.1	ATVHA-C1,AVA-P1,VHA-C1	ATPase, F0/V0 complex, subunit C protein	LOC_Os02g34510.1	--	vacuolar ATP synthase, putative, expressed
Seita.5G170400	black	no	1103.38	0.470958	AT3G12260.1	--	LYR family of Fe/S cluster biogenesis protein	LOC_Os07g44650.1	--	LYR motif containing protein, putative, expressed
Seita.4G038500	black	no	1510.28	0.470717	AT3G18030.1	ATHAL3,ATHAL3A,HAL3,HAL3A	HAL3-like protein A	LOC_Os06g09910.2	--	phosphopantothenoylcysteine decarboxylase, putative, expressed
Seita.9G503900	black	no	1307.58	0.468987	AT5G27470.1	--	seryl-tRNA synthetase / serine--tRNA ligase	LOC_Os01g37837.1	--	seryl-tRNA synthetase, putative, expressed
Seita.7G147700	black	no	1119.41	0.468197	AT3G01800.1	--	Ribosome recycling factor	LOC_Os04g41300.1	--	ribosome recycling factor, putative, expressed
Seita.6G161700	black	no	1255.64	0.465626	AT2G22480.1	PFK5	phosphofructokinase 5	LOC_Os08g34050.1	--	phosphofructokinase, putative, expressed
Seita.8G040000	black	no	1279.91	0.465601	AT5G52340.1	ATEXO70A2,EXO70A2	exocyst subunit exo70 family protein A2	LOC_Os11g05880.1	--	exo70 exocyst complex subunit, putative, expressed
Seita.1G143600	black	no	1537.89	0.465262	AT2G35680.1	--	Phosphotyrosine protein phosphatases superfamily protein	LOC_Os01g53710.1	--	dual specificity protein phosphatase, putative, expressed
Seita.7G154500	black	no	1214.38	0.46521	AT2G03670.1	CDC48B	cell division cycle 48B	LOC_Os04g42110.1	--	cell division control protein 48 homolog B, putative, expressed
Seita.7G283200	black	no	1396.41	0.465005	AT1G11475.1	NRPB10,NRPD10,NRPE10	RNA polymerases N / 8 kDa subunit	LOC_Os11g08940.1	--	RNA polymerases N 8 kDa subunit, putative, expressed
Seita.3G359800	black	no	1190.32	0.464877	AT1G53900.1	--	Eukaryotic translation initiation factor 2B (eIF-2B) family protein	LOC_Os12g31380.1	--	initiation factor 2 subunit family domain containing protein, expressed
Seita.1G072600	black	no	1327.61	0.464121	AT1G79200.1	--	--	LOC_Os02g07420.1	--	splicing factor, arginine/serine-rich 12, putative, expressed
Seita.9G233700	black	no	1538.24	0.463318	AT1G67120.1	--	ATPases;nucleotide binding;ATP binding;nucleoside-triphosphatases;transcription factor binding	LOC_Os10g31864.1	--	expressed protein
Seita.5G400300	black	no	1214.76	0.463185	AT1G71310.2	--	cobalt ion binding	LOC_Os01g65560.1	--	snRK1-interacting protein 1, putative, expressed
Seita.3G036500	black	no	1122.91	0.463006	AT1G72550.1	--	tRNA synthetase beta subunit family protein	LOC_Os05g48510.1	--	phenylalanyl-tRNA synthetase beta chain, putative, expressed
Seita.7G299900	black	no	1735.31	0.461133	AT2G24490.2	ATRPA2,ATRPA32A,ROR1,RPA2,RPA32A	replicon protein A2	LOC_Os02g58220.1	--	RPA2A - Putative single-stranded DNA binding complex subunit 2, expressed
Seita.4G164000	black	no	1469.1	0.461115	--	--	--	--	--	--
Seita.9G167200	black	no	1335.27	0.460948	AT4G33280.1	--	AP2/B3-like transcriptional factor family protein	LOC_Os03g42230.1	--	B3 DNA binding domain containing protein, expressed
Seita.9G229000	black	no	1271.13	0.460379	AT4G35490.1	MRPL11	mitochondrial ribosomal protein L11	LOC_Os10g32870.1	--	L11 domain containing ribosomal protein, putative, expressed
Seita.5G469700	black	no	1111.05	0.459406	AT2G39500.1	--	--	--	--	--
Seita.1G078300	black	no	1227.5	0.459198	AT3G11510.1	--	Ribosomal protein S11 family protein	LOC_Os02g06700.2	--	ribosomal protein, putative, expressed
Seita.1G134300	black	no	1572.73	0.459171	AT1G67850.2	--	Protein of unknown function (DUF707)	LOC_Os02g19510.2	--	lysine ketoglutarate reductase trans-splicing related 1, putative, expressed
Seita.5G303600	black	no	986.678	0.458206	AT1G17350.1	--	NADH:ubiquinone oxidoreductase intermediate-associated protein 30	LOC_Os01g52720.1	--	Complex I intermediate-associated protein 30 domain containing protein, putative, expressed
Seita.9G000400	black	no	1354.54	0.455433	AT3G54350.3	emb1967	Forkhead-associated (FHA) domain-containing protein	LOC_Os03g58640.1	--	FHA domain containing protein, putative, expressed
Seita.1G372200	black	no	1489.26	0.454582	AT1G63690.1	ATSPPL2,SPPL2	SIGNAL PEPTIDE PEPTIDASE-LIKE 2	LOC_Os02g57710.1	--	signal peptide peptidase-like 2B, putative, expressed
Seita.3G044500	black	no	1297.39	0.454041	AT5G13510.1	--	Ribosomal protein L10 family protein	LOC_Os05g03030.1	--	50S ribosomal protein L10, chloroplast precursor, putative, expressed
Seita.3G150000	black	no	1274.99	0.453958	AT1G66590.1	ATCOX19-1,COX19-1	cytochrome c oxidase 19-1	LOC_Os02g20940.1	--	CHCH domain containing protein, expressed
Seita.3G332600	black	no	1042.81	0.453383	AT5G03345.1	--	--	LOC_Os12g37880.1	--	expressed protein
Seita.7G100400	black	no	1584.87	0.452841	AT4G17010.1	--	--	LOC_Os02g29220.1	--	expressed protein
Seita.9G072900	black	no	977.513	0.452337	AT1G79010.1	--	Alpha-helical ferredoxin	LOC_Os03g56300.1	--	4Fe-4S binding domain containing protein, expressed
Seita.3G168700	black	no	1296.41	0.452292	AT2G34260.1	--	transducin family protein / WD-40 repeat family protein	LOC_Os07g46620.1	--	WD repeat-containing protein 55, putative, expressed
Seita.9G384200	black	no	1346.24	0.451844	AT5G39850.1	--	Ribosomal protein S4	LOC_Os11g38959.1	--	40S ribosomal protein S9-2, putative, expressed
Seita.8G109500	black	no	1496.89	0.449481	AT1G60080.1	--	3\'-5\'-exoribonuclease family protein	LOC_Os11g20689.1	--	exosome complex exonuclease, putative, expressed
Seita.9G002600	black	no	1261.61	0.448907	AT2G28000.1	CH-CPN60A,CPN60A,SLP	chaperonin-60alpha	LOC_Os03g64210.1	--	T-complex protein, putative, expressed
Seita.7G279600	black	no	1241.38	0.448474	AT5G25800.1	--	Polynucleotidyl transferase, ribonuclease H-like superfamily protein	LOC_Os12g08740.1	--	exonuclease, putative, expressed
Seita.1G343700	black	no	1173.86	0.447583	AT1G53750.1	RPT1A	regulatory particle triple-A 1A	LOC_Os02g54340.1	--	26S protease regulatory subunit 7, putative, expressed
Seita.3G182100	black	no	1211.01	0.447312	AT1G26470.1	--	--	LOC_Os05g43680.1	--	expressed protein
Seita.2G088300	black	no	1042.3	0.446846	AT2G32060.1	--	Ribosomal protein L7Ae/L30e/S12e/Gadd45 family protein	LOC_Os07g05580.1	--	ribosomal protein L7Ae, putative, expressed
Seita.9G219200	black	no	1094.47	0.446508	AT2G28430.1	--	--	LOC_Os10g34030.1	--	zinc finger, C3HC4 type domain containing protein, expressed
Seita.7G064800	black	no	1177.39	0.44645	AT3G25120.1	--	Mitochondrial import inner membrane translocase subunit Tim17/Tim22/Tim23 family protein	LOC_Os04g30740.1	--	mitochondrial import inner membrane translocase subunit Tim17, putative, expressed
Seita.5G253400	black	no	1277.57	0.446	AT4G32175.1	--	PNAS-3 related	LOC_Os01g66730.1	--	exosome complex exonuclease RRP40, putative, expressed
Seita.4G019200	black	no	1141.07	0.445064	AT2G45520.1	--	--	LOC_Os06g03920.1	--	expressed protein
Seita.9G029800	black	no	1296.9	0.444766	AT1G20575.1	--	Nucleotide-diphospho-sugar transferases superfamily protein	LOC_Os03g60939.1	--	dolichyl-phosphate beta-glycosyltransferase, putative, expressed
Seita.9G015200	black	no	1096.32	0.44404	AT2G31870.1	TEJ	Poly (ADP-ribose) glycohydrolase (PARG)	LOC_Os03g62680.1	--	expressed protein
Seita.2G326600	black	no	1228.7	0.443732	AT1G17130.1	--	Family of unknown function (DUF572)	LOC_Os01g40610.1	--	coiled-coil domain-containing protein, putative, expressed
Seita.6G163300	black	no	1119.73	0.443558	AT5G58005.2	--	Cytochrome c oxidase, subunit Vib family protein	LOC_Os08g34270.2	--	expressed protein
Seita.7G276900	black	no	1140.16	0.442625	AT2G29540.2	ATRPAC14,ATRPC14,RPC14	RNApolymerase 14 kDa subunit	LOC_Os12g09280.1	--	RNA polymerase subunit, putative, expressed
Seita.3G376800	black	no	1290.3	0.441209	AT1G10095.1	--	Protein prenylyltransferase superfamily protein	LOC_Os01g49060.1	--	prenyltransferase, putative, expressed
Seita.1G113100	black	no	1157.12	0.440062	AT2G03120.1	ATSPP,SPP	signal peptide peptidase	LOC_Os05g36070.3	--	signal peptide peptidase domain containing protein, expressed
Seita.3G184300	black	no	1399.67	0.440059	AT4G11060.1	MTSSB	mitochondrially targeted single-stranded DNA binding protein	LOC_Os05g43440.2	--	single-stranded DNA-binding protein, putative, expressed
Seita.7G223500	black	no	1217.04	0.439174	AT5G45580.1	--	Homeodomain-like superfamily protein	LOC_Os02g47190.1	--	MYB family transcription factor, putative, expressed
Seita.4G070600	black	no	1296.75	0.438109	AT1G13060.1	PBE1	20S proteasome beta subunit E1	LOC_Os06g06030.1	--	peptidase, T1 family, putative, expressed
Seita.5G416800	black	no	1211.56	0.437992	AT5G55120.1	VTC5	galactose-1-phosphate guanylyltransferase (GDP)s;GDP-D-glucose phosphorylases;quercetin 4\'-O-glucosyltransferases	LOC_Os01g67520.1	--	VTC2, putative, expressed
Seita.1G230600	black	no	1224.59	0.432821	AT5G44200.1	ATCBP20,CBP20	CAP-binding protein 20	LOC_Os02g39890.1	--	RNA recognition motif containing protein, putative, expressed
Seita.1G289900	black	no	1154.33	0.430657	AT4G14385.1	--	--	LOC_Os12g20310.1	--	sarcoma antigen NY-SAR-91, putative, expressed
Seita.1G032600	black	no	1272.18	0.429437	AT5G26180.1	--	S-adenosyl-L-methionine-dependent methyltransferases superfamily protein	LOC_Os02g12600.1	--	NOL1/NOP2/sun family protein, putative, expressed
Seita.8G057700	black	no	1142.77	0.42878	AT1G35530.2	--	DEAD/DEAH box RNA helicase family protein	LOC_Os11g07870.1	--	DEAD/DEAH box helicase domain containing protein, expressed
Seita.9G013500	black	no	1267.8	0.427122	AT3G23790.1	AAE16	AMP-dependent synthetase and ligase family protein	LOC_Os03g62850.1	--	AMP-binding enzyme, putative, expressed
Seita.3G103000	black	no	1174.26	0.426991	AT1G08220.1	--	--	LOC_Os05g08410.1	--	ATP10 protein, expressed
Seita.7G293700	black	no	1364.65	0.426569	AT1G21200.1	--	sequence-specific DNA binding transcription factors	LOC_Os12g06640.2	--	homeodomain, putative, expressed
Seita.9G200400	black	no	1089.4	0.424935	AT4G00660.1	ATRH8,RH8	RNAhelicase-like 8	LOC_Os02g42860.1	--	DEAD-box ATP-dependent RNA helicase, putative, expressed
Seita.8G194300	black	no	1112.35	0.424377	AT1G53850.2	ATPAE1,PAE1	20S proteasome alpha subunit E1	LOC_Os11g40140.1	--	peptidase, T1 family, putative, expressed
Seita.3G040100	black	no	1414.67	0.423898	AT3G21480.1	--	BRCT domain-containing DNA repair protein	LOC_Os05g05440.1	--	expressed protein
Seita.8G062200	black	no	1109.14	0.421972	AT5G63960.1	EMB2780	DNA binding;nucleotide binding;nucleic acid binding;DNA-directed DNA polymerases;DNA-directed DNA polymerases	LOC_Os11g08330.1	--	POLD1 - Putative DNA polymerase delta catalytic subunit, expressed
Seita.3G241100	black	no	1009.18	0.421757	AT3G49645.1	--	--	LOC_Os07g16140.1	--	FAD binding protein, putative, expressed
Seita.7G201700	black	no	1284.06	0.42148	AT1G17530.1	ATTIM23-1,TIM23-1	translocase of inner mitochondrial membrane 23	LOC_Os02g45100.1	--	mitochondrial import inner membrane translocase subunit Tim17, putative, expressed
Seita.3G265700	black	no	1222.09	0.419959	AT1G07930.1	--	GTP binding Elongation factor Tu family protein	LOC_Os03g08010.1	--	elongation factor Tu, putative, expressed
Seita.2G385800	black	no	1019.64	0.41947	AT2G23930.1	SNRNP-G	probable small nuclear ribonucleoprotein G	LOC_Os03g29740.1	--	LSM domain containing protein, expressed
Seita.7G075200	black	no	1051.56	0.419178	AT2G43810.2	--	Small nuclear ribonucleoprotein family protein	LOC_Os02g30624.2	--	LSM domain containing protein, expressed
Seita.6G054800	black	no	1097.89	0.41863	AT4G27585.1	--	SPFH/Band 7/PHB domain-containing membrane-associated protein family	LOC_Os08g06200.1	--	stomatin-like protein 2, putative, expressed
Seita.2G270600	black	no	1317.76	0.416813	AT3G51980.1	--	ARM repeat superfamily protein	LOC_Os09g33780.1	--	expressed protein
Seita.1G081000	black	no	1214.58	0.415962	AT1G71260.1	ATWHY2,WHY2	WHIRLY 2	LOC_Os02g06370.1	--	whirly transcription factor domain containing protein, expressed
Seita.1G199300	black	no	1233.09	0.415113	AT1G14450.1	--	NADH dehydrogenase (ubiquinone)s	LOC_Os02g35610.1	--	expressed protein
Seita.7G273800	black	no	1295.21	0.414332	AT4G35530.1	--	phosphatidylinositolglycan-related	LOC_Os05g07260.2	--	phosphatidylinositolglycan-related, putative, expressed
Seita.9G362600	black	no	1345.98	0.413432	AT3G25150.2	--	Nuclear transport factor 2 (NTF2) family protein with RNA binding (RRM-RBD-RNP motifs) domain	LOC_Os03g30550.1	--	RNA-binding protein-like, putative, expressed
Seita.9G449300	black	no	1207.72	0.412548	AT1G61620.1	--	phosphoinositide binding	LOC_Os03g17170.1	--	zinc finger, C3HC4 type domain containing protein, expressed
Seita.4G185900	black	no	1202.25	0.410908	AT1G53645.1	--	hydroxyproline-rich glycoprotein family protein	LOC_Os06g45390.1	--	expressed protein
Seita.5G123500	black	no	1166.22	0.410906	AT3G15660.1	ATGRX4,GRX4	glutaredoxin 4	LOC_Os01g34620.5	--	OsGrx_S15.1 - glutaredoxin subgroup II, expressed
Seita.2G130400	black	no	1037.81	0.41045	--	--	--	LOC_Os03g46730.1	--	expressed protein
Seita.9G012300	black	no	1459.67	0.40989	AT1G61000.1	--	--	LOC_Os03g38010.1	--	nuf2 family protein, expressed
Seita.3G153300	black	no	1118.4	0.408537	AT3G10140.1	RECA3	RECA homolog 3	LOC_Os01g71690.2	--	recA protein, expressed
Seita.9G078400	black	no	1399.56	0.408228	AT1G47640.1	--	--	LOC_Os03g55730.1	--	SSA2 - 2S albumin seed storage family protein precursor, putative, expressed
Seita.2G321500	black	no	1446.31	0.407791	AT1G52520.1	FRS6	FAR1-related sequence 6	LOC_Os07g31420.1	--	transposon protein, putative, unclassified, expressed
Seita.7G254600	black	no	1501.63	0.405075	AT5G54260.1	ATMRE11,MRE11	DNA repair and meiosis protein (Mre11)	LOC_Os04g54340.1	--	double-strand break repair protein MRE11, putative, expressed
Seita.1G093000	black	no	1364.11	0.403833	AT1G10930.1	ATRECQ4A,ATSGS1,RECQ4A	DNA helicase (RECQl4A)	LOC_Os04g35420.1	--	helicase conserved C-terminal domain containing protein, expressed
Seita.5G200400	black	no	1148.69	0.403314	AT3G02520.1	GF14 NU,GRF7	general regulatory factor 7	LOC_Os08g33370.2	--	14-3-3 protein, putative, expressed
Seita.5G467400	black	no	1301.81	0.403118	AT3G48250.1	--	Pentatricopeptide repeat (PPR) superfamily protein	LOC_Os01g73950.1	--	PPR repeat containing protein, expressed
Seita.2G183200	black	no	1023.91	0.402618	AT5G56740.1	HAC07,HAC7,HAG02,HAG2	histone acetyltransferase of the GNAT family 2	LOC_Os09g17850.1	--	acetyltransferase type B catalytic subunit, putative, expressed
Seita.3G351800	black	no	1041.33	0.402269	AT1G27330.1	--	Ribosome associated membrane protein RAMP4	LOC_Os11g41875.2	--	membrane protein, putative, expressed
Seita.2G303500	black	no	1056.52	0.401983	AT5G27430.1	--	Signal peptidase subunit	LOC_Os09g38370.1	--	signal peptidase complex subunit 3, putative, expressed
Seita.3G396600	black	no	1384.22	0.401883	AT5G62510.1	--	F-box family protein	LOC_Os07g35050.1	--	OsFBX237 - F-box domain containing protein, expressed
Seita.2G165700	black	no	1331.54	0.401612	AT3G12340.1	--	FKBP-like peptidyl-prolyl cis-trans isomerase family protein	LOC_Os09g12270.1	--	peptidyl-prolyl cis-trans isomerase, FKBP-type, putative, expressed
Seita.1G260200	black	no	1008.76	0.401238	AT4G17310.1	--	--	LOC_Os02g44100.1	--	expressed protein
Seita.8G183700	black	no	1363.57	0.400679	AT5G66410.1	PLP3b	phosducin-like protein 3 homolog	LOC_Os05g16630.1	--	thioredoxin domain-containing protein 9, putative, expressed
Seita.7G232000	black	no	1234.52	0.400232	AT1G79350.1	EMB1135	RING/FYVE/PHD zinc finger superfamily protein	LOC_Os04g52074.1	--	expressed protein
Seita.1G201100	black	no	1083.73	0.39958	AT1G17410.1	--	Nucleoside diphosphate kinase family protein	LOC_Os02g35700.1	--	nucleoside diphosphate kinase, putative, expressed
Seita.3G205100	black	no	1355.07	0.399189	AT3G05760.1	--	C2H2 and C2HC zinc fingers superfamily protein	LOC_Os03g61640.1	--	ZOS3-23 - C2H2 zinc finger protein, expressed
Seita.1G276100	black	no	1126.89	0.399091	AT5G41970.1	--	Metal-dependent protein hydrolase	LOC_Os02g46150.1	--	GAMM1 protein-like, putative, expressed
Seita.3G025700	black	no	1567.47	0.398734	AT5G10010.1	--	--	LOC_Os04g56590.1	--	ATP/GTP binding protein, putative, expressed
Seita.2G381300	black	no	1437.01	0.398516	AT5G61030.1	GR-RBP3	glycine-rich RNA-binding protein 3	LOC_Os07g41120.1	--	RNA recognition motif containing protein, putative, expressed
Seita.8G117400	black	no	1117.83	0.398336	AT3G07230.1	--	wound-responsive protein-related	--	--	--
Seita.9G518400	black	no	1345.78	0.396749	AT5G35590.1	PAA1	proteasome alpha subunit A1	LOC_Os03g08280.1	--	peptidase, T1 family, putative, expressed
Seita.3G270900	black	no	1462.23	0.396726	AT1G02840.3	ATSRP34,SR1,SRP34	RNA-binding (RRM/RBD/RNP motifs) family protein	LOC_Os05g30140.1	--	RNA recognition motif containing protein, expressed
Seita.1G121000	black	no	1213.09	0.396291	AT2G31440.1	--	--	LOC_Os02g17280.1	--	gamma-secretase subunit APH-1B, putative, expressed
Seita.2G292600	black	no	1242.07	0.395461	AT1G21740.1	--	Protein of unknown function (DUF630 and DUF632)	LOC_Os09g37040.1	--	DUF630/DUF632 domains containing protein, putative, expressed
Seita.6G248900	black	no	1290.09	0.394292	AT3G11540.1	SPY	Tetratricopeptide repeat (TPR)-like superfamily protein	LOC_Os08g44510.1	--	UDP-N-acetylglucosamine--peptide N-acetylglucosaminyltransferase SPINDLY, putative, expressed
Seita.9G128000	black	no	1033.28	0.393879	AT1G03150.1	--	Acyl-CoA N-acyltransferases (NAT) superfamily protein	LOC_Os03g49230.1	--	acetyltransferase, GNAT family, putative, expressed
Seita.7G047900	black	no	1250.97	0.392117	AT5G47890.1	--	NADH-ubiquinone oxidoreductase B8 subunit, putative	LOC_Os04g24520.1	--	ribosomal protein L51, putative, expressed
Seita.3G129100	black	no	1080.49	0.39192	--	--	--	--	--	--
Seita.9G104200	black	no	1203.38	0.390601	AT5G41880.1	POLA3,POLA4	DNA primases;DNA primases	LOC_Os05g29010.2	--	POLA4 - Putative DNA polymerase alpha complex subunit, expressed
Seita.2G124400	black	no	1187.83	0.390142	AT2G44710.1	--	RNA-binding (RRM/RBD/RNP motifs) family protein	LOC_Os07g27110.1	--	RNA recognition motif containing protein, expressed
Seita.3G027600	black	no	1351.85	0.388631	AT2G30000.1	--	PHF5-like protein	LOC_Os04g56760.1	--	PHF5-like protein domain containing protein, expressed
Seita.3G019800	black	no	1262.85	0.388106	AT1G32230.1	ATP8,CEO,CEO1,RCD1	WWE protein-protein interaction domain protein family	LOC_Os04g57640.1	--	RCD1, putative, expressed
Seita.8G110400	black	no	1509.29	0.388104	AT5G36230.1	--	ARM repeat superfamily protein	LOC_Os11g21990.1	--	expressed protein
Seita.7G057000	black	no	1206.38	0.387446	AT2G43110.1	--	--	LOC_Os04g28060.1	--	expressed protein
Seita.9G214600	black	no	1190.16	0.386476	AT1G17330.1	--	Metal-dependent phosphohydrolase	LOC_Os10g34470.1	--	HD domain containing protein 2, putative, expressed
Seita.9G231400	black	no	1329.68	0.386016	AT3G23990.1	HSP60,HSP60-3B	heat shock protein 60	LOC_Os10g32550.1	--	T-complex protein, putative, expressed
Seita.6G162800	black	no	1132.59	0.382	AT2G25110.1	AtSDF2,ATSDL,SDF2	stromal cell-derived factor 2-like protein precursor	LOC_Os08g34190.1	--	stromal cell-derived factor 2-like protein precursor, putative, expressed
Seita.9G419500	black	no	1130.9	0.380664	AT4G26410.1	--	Uncharacterised conserved protein UCP022280	LOC_Os03g20860.1	--	expressed protein
Seita.3G072300	black	no	1213.95	0.380051	AT1G24265.2	--	Protein of unknown function (DUF1664)	LOC_Os05g01320.1	--	expressed protein
Seita.3G343300	black	no	1134.59	0.379519	AT3G04600.3	--	Nucleotidylyl transferase superfamily protein	LOC_Os12g35570.1	--	tRNA synthetase, putative, expressed
Seita.2G080300	black	no	1162.77	0.37879	AT5G04320.2	--	Shugoshin C terminus	LOC_Os02g55570.1	--	shugoshin-1, putative, expressed
Seita.4G106800	black	no	1001.85	0.378669	AT5G15750.1	--	Alpha-L RNA-binding motif/Ribosomal protein S4 family protein	LOC_Os04g56670.2	--	S4 domain containing protein, putative, expressed
Seita.5G362200	black	no	1049.89	0.37649	AT2G40660.1	--	Nucleic acid-binding, OB-fold-like protein	LOC_Os01g60660.1	--	methionyl-tRNA synthetase, putative, expressed
Seita.9G463800	black	no	1218.03	0.375986	AT1G13450.1	--	Homeodomain-like superfamily protein	LOC_Os04g40930.1	--	MYB family transcription factor, putative, expressed
Seita.5G439100	black	no	1581.53	0.37583	AT5G61830.1	--	NAD(P)-binding Rossmann-fold superfamily protein	LOC_Os01g70430.1	--	oxidoreductase, short chain dehydrogenase/reductase family domain containing protein, expressed
Seita.9G579800	black	no	1110.94	0.374873	AT4G17610.1	--	tRNA/rRNA methyltransferase (SpoU) family protein	LOC_Os03g01110.1	--	RNA methyltransferase, TrmH family protein, putative, expressed
Seita.1G146900	black	no	1084.41	0.373445	--	--	--	--	--	--
Seita.5G431100	black	no	1526.27	0.3731	AT1G67490.1	GCS1,KNF	glucosidase 1	LOC_Os01g69210.1	--	mannosyl-oligosaccharide glucosidase, putative, expressed
Seita.5G012500	black	no	1193.56	0.372147	AT3G20630.1	ATUBP14,PER1,TTN6,UBP14	ubiquitin-specific protease 14	LOC_Os01g08200.1	--	ubiquitin carboxyl-terminal hydrolase 14, putative, expressed
Seita.4G016800	black	no	1382.69	0.371317	AT1G01920.2	--	SET domain-containing protein	LOC_Os06g03676.1	--	CAMK_CAMK_like.6 - CAMK includes calcium/calmodulin depedent protein kinases, expressed
Seita.7G320300	black	no	1105.1	0.370765	AT2G28600.1	--	P-loop containing nucleoside triphosphate hydrolases superfamily protein	LOC_Os12g05230.1	--	ATP-dependent RNA helicase, putative, expressed
Seita.9G096000	black	no	1065.23	0.370747	AT3G22845.1	--	emp24/gp25L/p24 family/GOLD family protein	LOC_Os03g53310.1	--	emp24/gp25L/p24 family protein, putative, expressed
Seita.9G075200	black	no	1366.19	0.370008	AT5G55550.3	--	RNA-binding (RRM/RBD/RNP motifs) family protein	LOC_Os11g41890.1	--	RNA recognition motif containing protein, putative, expressed
Seita.9G080700	black	no	1036.48	0.369963	AT2G34250.2	--	SecY protein transport family protein	LOC_Os03g11440.1	--	protein transport protein Sec61 subunit alpha, putative, expressed
Seita.6G107500	black	no	1366.48	0.369075	AT1G80710.1	DRS1	DROUGHT SENSITIVE 1	LOC_Os08g18150.1	--	WD domain, G-beta repeat domain containing protein, expressed
Seita.9G206000	black	no	1062.62	0.368725	AT1G20270.1	--	2-oxoglutarate (2OG) and Fe(II)-dependent oxygenase superfamily protein	LOC_Os10g35470.1	--	oxidoreductase, putative, expressed
Seita.2G416800	black	no	1036.23	0.364924	--	--	--	LOC_Os07g46400.1	--	expressed protein
Seita.7G231000	black	no	1378.39	0.364206	AT5G05680.1	MOS7	nuclear pore complex protein-related	LOC_Os04g51900.1	--	expressed protein
Seita.1G272400	black	no	1019.62	0.362714	AT4G01320.1	ATSTE24,STE24	Peptidase family M48 family protein	LOC_Os02g45650.1	--	peptidase, putative, expressed
Seita.2G412300	black	no	1278.35	0.362566	AT5G08530.1	CI51	51 kDa subunit of complex I	LOC_Os07g45090.1	--	NADH-ubiquinone oxidoreductase 51 kDa subunit, mitochondrial precursor, putative, expressed
Seita.3G146400	black	no	1124.91	0.361191	AT5G44150.1	--	--	LOC_Os05g48940.1	--	expressed protein
Seita.3G354500	black	no	1078.71	0.360659	AT3G43980.1	--	Ribosomal protein S14p/S29e family protein	LOC_Os12g32380.1	--	40S ribosomal protein S29, putative, expressed
Seita.3G084200	black	no	944.207	0.36015	AT4G19400.1	--	Profilin family protein	LOC_Os05g15180.1	--	expressed protein
Seita.9G147700	black	no	1191.22	0.359059	AT3G22590.1	CDC73,PHP	PLANT HOMOLOGOUS TO PARAFIBROMIN	LOC_Os03g46190.2	--	parafibromin, putative, expressed
Seita.1G100900	black	no	1062.76	0.357233	AT3G33520.1	ARP6,ATARP6,ESD1,SUF3	actin-related protein 6	LOC_Os01g16414.1	--	actin, putative, expressed
Seita.5G193900	black	no	1425	0.356939	AT5G63080.1	--	2-oxoglutarate (2OG) and Fe(II)-dependent oxygenase superfamily protein	LOC_Os01g36630.1	--	jmjC domain-containing protein 4, putative, expressed
Seita.3G271900	black	no	1191	0.355959	AT1G49350.1	--	pfkB-like carbohydrate kinase family protein	LOC_Os05g09370.2	--	kinase, pfkB family, putative, expressed
Seita.2G444900	black	no	1100.32	0.355902	AT1G15720.1	TRFL5	TRF-like 5	LOC_Os07g49530.1	--	MYB family transcription factor, putative, expressed
Seita.4G269100	black	no	1135.9	0.354342	AT2G35010.1	ATO1,TO1	thioredoxin O1	LOC_Os06g45510.2	--	thioredoxin, putative, expressed
Seita.6G024000	black	no	1122.95	0.353429	AT4G17020.3	--	transcription factor-related	LOC_Os04g58350.1	--	TFIIH basal transcription factor complex p52 subunit, putative, expressed
Seita.9G492200	black	no	1299.05	0.352796	AT5G07950.1	--	--	LOC_Os03g11450.1	--	expressed protein
Seita.5G326300	black	no	1125.75	0.352596	--	--	--	--	--	--
Seita.9G299600	black	no	1124.21	0.352241	--	--	--	LOC_Os10g03780.1	--	OsFBX351 - F-box domain containing protein, expressed
Seita.4G058800	black	no	1052.19	0.352047	AT2G21790.1	ATRNR1,CLS8,R1,RNR1	ribonucleotide reductase 1	LOC_Os06g07210.1	--	ribonucleoside-diphosphate reductase large subunit, putative, expressed
Seita.2G327300	black	no	1510.95	0.351588	AT5G66360.2	--	Ribosomal RNA adenine dimethylase family protein	LOC_Os07g32550.1	--	dimethyladenosine transferase, putative, expressed
Seita.2G134300	black	no	916.974	0.351474	AT2G27730.1	--	copper ion binding	LOC_Os09g39550.1	--	expressed protein
Seita.9G568100	black	no	1294.23	0.350765	AT2G46470.1	OXA1L	inner membrane protein OXA1-like	LOC_Os03g02480.1	--	inner membrane protein, putative, expressed
Seita.5G259300	black	no	1008.37	0.350215	AT2G45280.2	ATRAD51C,RAD51C	RAS associated with diabetes protein 51C	LOC_Os01g39630.1	--	DNA repair protein Rad51, putative, expressed
Seita.3G333000	black	no	1089.49	0.35019	AT3G17300.1	--	--	LOC_Os12g37850.1	--	expressed protein
Seita.2G044300	black	no	1069.99	0.349587	AT5G44500.1	--	Small nuclear ribonucleoprotein family protein	LOC_Os07g07220.1	--	LSM domain containing protein, expressed
Seita.2G316500	black	no	1016.73	0.348912	AT3G15351.1	--	--	LOC_Os07g30220.1	--	expressed protein
Seita.7G084800	black	no	1128.21	0.348331	AT4G11630.1	--	Ribosomal protein L19 family protein	LOC_Os02g11030.1	--	50S ribosomal protein L19, chloroplast precursor, putative, expressed
Seita.6G026400	black	no	1087.16	0.348016	AT1G30960.1	--	GTP-binding family protein	LOC_Os08g10649.1	--	GTPase of unknown function domain containing protein, putative, expressed
Seita.1G194200	black	no	1070.08	0.347659	AT5G08630.1	--	DDT domain-containing protein	LOC_Os02g35100.2	--	DDT domain containing protein, putative, expressed
Seita.J029600	black	no	967.447	0.347558	AT5G56780.1	ATET2,ET2	effector of transcription2	LOC_Os07g39800.1	--	transcription repressor HOTR, putative, expressed
Seita.9G254000	black	no	1122.34	0.345404	AT4G33200.1	ATXI-I,XI-15,XI-I	myosin, putative	LOC_Os06g29350.1	--	myosin, putative, expressed
Seita.4G040600	black	no	1070.11	0.344787	--	--	--	LOC_Os07g43480.1	--	expressed protein
Seita.5G471000	black	no	1065.7	0.344548	AT5G03160.1	ATP58IPK,P58IPK	homolog of mamallian P58IPK	LOC_Os01g74580.1	--	dnaJ homolog subfamily C member, putative, expressed
Seita.2G260600	black	no	1479.28	0.344503	AT1G51580.1	--	RNA-binding KH domain-containing protein	LOC_Os09g32300.1	--	KH domain-containing protein, putative, expressed
Seita.5G394500	black	no	1376.94	0.342341	AT5G67100.1	ICU2	DNA-directed DNA polymerases	LOC_Os01g64820.1	--	POLA1 - Putative DNA polymerase alpha catalytic subunit, expressed
Seita.3G074100	black	no	1052.55	0.342312	AT1G11760.1	MED32	--	LOC_Os10g40070.1	--	expressed protein
Seita.8G067600	black	no	1128.63	0.341191	AT1G77510.1	ATPDI6,ATPDIL1-2,PDI6,PDIL1-2	PDI-like 1-2	LOC_Os11g09280.2	--	OsPDIL1-1 protein disulfide isomerase PDIL1-1, expressed
Seita.1G181600	black	no	1033.04	0.3405	AT3G60500.2	CER7,G3	3\'-5\'-exoribonuclease family protein	LOC_Os02g34570.1	--	exosome complex exonuclease, putative, expressed
Seita.9G374500	black	no	1159.51	0.340437	AT1G53710.1	--	Calcineurin-like metallo-phosphoesterase superfamily protein	LOC_Os03g27950.1	--	Ser/Thr protein phosphatase family protein, putative, expressed
Seita.6G087700	black	no	1157.84	0.339575	AT4G00830.2	--	RNA-binding (RRM/RBD/RNP motifs) family protein	LOC_Os10g06130.1	--	RNA recognition motif containing protein, expressed
Seita.3G213400	black	no	784.151	0.336338	AT5G02960.1	--	Ribosomal protein S12/S23 family protein	LOC_Os03g60400.1	--	40S ribosomal protein S23, putative, expressed
Seita.3G249800	black	no	1277.36	0.334305	AT2G36230.1	APG10,HISN3	Aldolase-type TIM barrel family protein	LOC_Os05g33260.2	--	1-5-phosphoribosyl-5-5-phosphoribosylaminomethylideneaminoimidazole-4-carboxamide isomerase, chloroplast precursor, putative, expressed
Seita.8G002200	black	no	895.312	0.333865	AT5G60460.1	--	Preprotein translocase Sec, Sec61-beta subunit protein	LOC_Os11g01300.1	--	protein transport protein Sec61 subunit beta, putative, expressed
Seita.3G181700	black	no	1000.52	0.332174	AT1G71800.1	CSTF64	cleavage stimulating factor 64	LOC_Os05g43780.1	--	ESP1, putative, expressed
Seita.5G411900	black	no	1088	0.332053	AT1G05720.1	--	selenoprotein family protein	LOC_Os01g66960.1	--	selenoprotein precursor, putative, expressed
Seita.9G046200	black	no	923.714	0.331673	AT4G32470.1	--	Cytochrome bd ubiquinol oxidase, 14kDa subunit	LOC_Os03g59220.1	--	cytochrome b-c1 complex subunit 7, putative, expressed
Seita.9G382200	black	no	955.554	0.33127	AT1G22140.1	--	--	LOC_Os03g26791.1	--	expressed protein
Seita.2G274100	black	no	1218.13	0.331107	AT2G31370.5	--	Basic-leucine zipper (bZIP) transcription factor family protein	LOC_Os09g34060.1	--	transcription factor RF2a, putative, expressed
Seita.9G145300	black	no	954.879	0.331078	AT3G46940.1	DUT1	DUTP-PYROPHOSPHATASE-LIKE 1	LOC_Os03g46640.1	--	deoxyuridine 5-triphosphate nucleotidohydrolase, putative, expressed
Seita.1G073400	black	no	1294.89	0.330242	AT1G79550.1	PGK	phosphoglycerate kinase	LOC_Os02g07260.1	--	phosphoglycerate kinase protein, putative, expressed
Seita.8G082900	black	no	1125.05	0.328267	AT5G18420.1	--	--	LOC_Os11g13694.1	--	AGAP007117-PA, putative, expressed
Seita.5G049800	black	no	1071.48	0.327328	AT3G10530.1	--	Transducin/WD40 repeat-like superfamily protein	LOC_Os01g08770.1	--	WD domain, G-beta repeat domain containing protein, expressed
Seita.5G434600	black	no	1059.96	0.327189	AT3G48710.1	--	DEK domain-containing chromatin associated protein	LOC_Os01g70020.1	--	DEK C terminal domain containing protein, expressed
Seita.6G225600	black	no	1326.93	0.326312	AT5G50810.1	TIM8	translocase inner membrane subunit 8	LOC_Os08g42380.1	--	mitochondrial import inner membrane translocase subunit Tim, putative, expressed
Seita.9G158200	black	no	1014.64	0.324983	--	--	--	--	--	--
Seita.9G363200	black	no	982.353	0.324955	AT2G03510.1	--	SPFH/Band 7/PHB domain-containing membrane-associated protein family	LOC_Os03g30790.1	--	erlin-2 precursor, putative, expressed
Seita.5G071000	black	no	1037.62	0.324846	AT5G06590.1	--	--	LOC_Os12g42840.1	--	expressed protein
Seita.4G083200	black	no	941.241	0.324695	AT1G09580.1	--	emp24/gp25L/p24 family/GOLD family protein	LOC_Os06g10760.1	--	emp24/gp25L/p24 family protein, putative, expressed
Seita.2G035700	black	no	1152.57	0.323939	--	--	--	--	--	--
Seita.9G300500	black	no	1267.44	0.322762	AT1G70640.1	--	octicosapeptide/Phox/Bem1p (PB1) domain-containing protein	LOC_Os03g28300.1	--	protein kinase domain containing protein, expressed
Seita.2G279500	black	no	1075.84	0.321595	AT1G01910.2	--	P-loop containing nucleoside triphosphate hydrolases superfamily protein	LOC_Os09g34970.1	--	arsenical pump-driving ATPase, putative, expressed
Seita.7G300600	black	no	949.91	0.320892	--	--	--	--	--	--
Seita.3G082300	black	no	1185.16	0.320159	--	--	--	LOC_Os05g14310.1	--	expressed protein
Seita.4G114400	black	no	871.681	0.319728	AT3G49100.1	--	Signal recognition particle, SRP9/SRP14 subunit	LOC_Os06g14550.1	--	signal recognition particle 9 kDa protein, putative, expressed
Seita.2G054700	black	no	1193.21	0.319621	AT4G32440.1	--	Plant Tudor-like RNA-binding protein	LOC_Os07g08220.1	--	expressed protein
Seita.3G324500	black	no	1031.76	0.316426	AT5G08040.1	TOM5	mitochondrial import receptor subunit TOM5 homolog	LOC_Os12g38650.1	--	expressed protein
Seita.4G231000	black	no	1055.07	0.316299	AT4G38130.1	ATHD1,ATHDA19,HD1,HDA1,HDA19,RPD3A	histone deacetylase 1	LOC_Os06g38470.1	--	histone deacetylase 19, putative, expressed
Seita.9G032900	black	no	1002.64	0.313928	AT4G15770.1	--	RNA binding	LOC_Os07g47420.1	--	60S ribosome subunit biogenesis protein NIP7, putative, expressed
Seita.1G358000	black	no	1063.79	0.305333	AT2G37195.1	--	--	LOC_Os02g56190.1	--	expressed protein
Seita.7G181900	black	no	849.23	0.304661	AT3G49100.1	--	Signal recognition particle, SRP9/SRP14 subunit	LOC_Os06g14550.1	--	signal recognition particle 9 kDa protein, putative, expressed
Seita.6G074500	black	no	1028.09	0.300683	AT1G01280.1	CYP703,CYP703A2	cytochrome P450, family 703, subfamily A, polypeptide 2	LOC_Os08g03682.1	--	cytochrome P450, putative, expressed
Seita.3G357400	black	no	929.911	0.300678	AT4G08790.1	--	Nitrilase/cyanide hydratase and apolipoprotein N-acyltransferase family protein	LOC_Os12g31830.1	--	nitrilase, putative, expressed
Seita.6G193500	black	no	1079.05	0.298788	AT3G13224.2	--	RNA-binding (RRM/RBD/RNP motifs) family protein	LOC_Os08g38410.3	--	RNA recognition motif containing protein, putative, expressed
Seita.9G351600	black	no	915.525	0.297898	AT3G56870.1	--	--	LOC_Os03g39740.2	--	expressed protein
Seita.5G012600	black	no	865.808	0.297269	--	--	--	--	--	--
Seita.9G051700	black	no	1236.59	0.295423	AT2G02590.1	--	--	LOC_Os03g58620.1	--	small multi-drug export protein, putative, expressed
Seita.5G229100	black	no	1189.83	0.295115	AT5G08610.1	--	P-loop containing nucleoside triphosphate hydrolases superfamily protein	LOC_Os01g43120.1	--	DEAD/DEAH box helicase, putative, expressed
Seita.3G002000	black	no	1167.89	0.293555	AT3G10220.1	--	tubulin folding cofactor B	LOC_Os04g59560.1	--	tubulin folding cofactor B, putative, expressed
Seita.5G390500	black	no	888.244	0.292467	AT5G09270.2	--	--	LOC_Os01g64190.1	--	expressed protein
Seita.9G572100	black	no	1027.66	0.28987	AT5G09860.1	AtHPR1,AtTHO1,HPR1,THO1	nuclear matrix protein-related	LOC_Os03g01970.1	--	THO complex subunit 1, putative, expressed
Seita.5G398200	black	no	934.886	0.288063	--	--	--	--	--	--
Seita.5G180400	black	no	950.76	0.286341	AT1G68370.1	ARG1	Chaperone DnaJ-domain superfamily protein	LOC_Os01g32870.2	--	heat shock protein DnaJ, putative, expressed
Seita.6G175100	black	no	1165.72	0.284175	AT1G13570.1	--	F-box/RNI-like superfamily protein	LOC_Os08g35960.3	--	OsFBD14 - F-box and FBD domain containing protein, expressed
Seita.7G169800	black	no	1125.09	0.282177	AT1G03360.1	ATRRP4,RRP4	ribosomal RNA processing 4	LOC_Os04g43922.1	--	exosome complex exonuclease rrp4, putative, expressed
Seita.9G520000	black	no	1011.42	0.280426	AT3G42725.1	--	Putative membrane lipoprotein	--	--	--
Seita.9G231600	black	no	1100	0.280323	--	--	--	LOC_Os07g07520.1	--	OsFBX217 - F-box domain containing protein, expressed
Seita.9G154400	black	no	1015.61	0.279609	AT1G22150.1	SULTR1;3	sulfate transporter 1;3	LOC_Os03g09970.3	--	sulfate transporter, putative, expressed
Seita.1G075400	black	no	883.39	0.277535	AT1G21840.1	UREF	urease accessory protein F	LOC_Os02g07150.1	--	urease accessory protein F, putative, expressed
Seita.4G031800	black	no	917.114	0.276345	AT5G51960.1	--	--	LOC_Os11g03920.1	--	expressed protein
Seita.2G328700	black	no	1334.14	0.27548	AT1G05120.1	--	Helicase protein with RING/U-box domain	LOC_Os07g32730.1	--	DNA repair protein rhp16, putative, expressed
Seita.9G117200	black	no	881.204	0.273843	--	--	--	LOC_Os03g50570.1	--	expressed protein
Seita.1G073700	black	no	917.831	0.273194	AT2G39440.1	--	--	LOC_Os02g07240.1	--	expressed protein
Seita.2G109000	black	no	1036.87	0.272439	AT1G28250.1	--	--	LOC_Os07g20410.1	--	expressed protein
Seita.9G537900	black	no	1006.98	0.272104	AT2G39020.1	--	Acyl-CoA N-acyltransferases (NAT) superfamily protein	LOC_Os03g05710.1	--	acetyltransferase, GNAT family, putative, expressed
Seita.5G001800	black	no	1102.41	0.270377	AT3G10310.1	--	P-loop nucleoside triphosphate hydrolases superfamily protein with CH (Calponin Homology) domain	LOC_Os11g44880.1	--	kinesin-4, putative, expressed
Seita.5G426000	black	no	1038.39	0.270154	AT5G51640.1	TBL17,YLS7	Plant protein of unknown function (DUF828)	LOC_Os01g68630.1	--	leaf senescence related protein, putative, expressed
Seita.9G188300	black	no	1211.94	0.268004	AT5G44280.1	ATRING1A,RING1A	RING 1A	LOC_Os05g41795.1	--	zinc finger C3HC4 type family protein, putative, expressed
Seita.4G196700	black	no	905.465	0.266699	--	--	--	LOC_Os06g44060.1	--	phospholipase D. Active site motif family protein, expressed
Seita.9G089300	black	no	869.99	0.266662	--	--	--	--	--	--
Seita.3G163900	black	no	965.159	0.264889	AT5G26680.2	--	5\'-3\' exonuclease family protein	LOC_Os05g46270.1	--	FEN1A - Putative flap endonuclease protein, expressed
Seita.5G417500	black	no	994.456	0.264648	AT4G25610.2	--	C2H2-like zinc finger protein	LOC_Os12g35490.1	--	expressed protein
Seita.7G197300	black	no	960.015	0.263732	AT3G53220.1	--	Thioredoxin superfamily protein	LOC_Os04g47260.1	--	expressed protein
Seita.3G118600	black	no	970.857	0.261748	AT5G11600.1	--	--	LOC_Os05g51754.1	--	expressed protein
Seita.3G258600	black	no	1037.38	0.25826	AT4G02750.1	--	Tetratricopeptide repeat (TPR)-like superfamily protein	LOC_Os06g05140.1	--	pentatricopeptide, putative, expressed
Seita.5G043100	black	no	975.191	0.257978	--	--	--	--	--	--
Seita.5G401600	black	no	993.997	0.257527	AT3G56570.1	--	SET domain-containing protein	LOC_Os01g65730.1	--	SET domain containing protein, expressed
Seita.8G124600	black	no	1031.01	0.257491	AT4G24940.1	AT-SAE1-1,ATSAE1A,SAE1A	SUMO-activating enzyme 1A	LOC_Os11g30410.1	--	ThiF family domain containing protein, putative, expressed
Seita.4G257700	black	no	958.91	0.256203	AT5G15920.1	SMC5	structural maintenance of chromosomes 5	LOC_Os05g51790.1	--	RecF/RecN/SMC N terminal domain containing protein, expressed
Seita.7G213000	black	no	970.612	0.255826	AT5G06750.3	--	Protein phosphatase 2C family protein	LOC_Os04g49490.2	--	protein phosphatase 2C, putative, expressed
Seita.3G381700	black	no	823.899	0.255618	AT5G45160.1	--	Root hair defective 3 GTP-binding protein (RHD3)	LOC_Os12g41170.1	--	SEY1, putative, expressed
Seita.9G529300	black	no	990.693	0.255503	AT5G63920.1	TOP3A	topoisomerase 3alpha	LOC_Os03g06900.1	--	DNA topoisomerase 3 protein, putative, expressed
Seita.7G267300	black	no	928.233	0.253963	AT3G52860.1	--	--	LOC_Os05g06290.1	--	expressed protein
Seita.3G011500	black	no	849.567	0.252434	AT4G00590.1	--	N-terminal nucleophile aminohydrolases (Ntn hydrolases) superfamily protein	LOC_Os04g58600.2	--	L-asparaginase precursor protein, putative, expressed
Seita.1G292000	black	no	953.833	0.251165	AT5G10330.2	ATHPA1,EMB2196,HISN6A,HPA1	histidinol phosphate aminotransferase 1	LOC_Os02g47940.1	--	aminotransferase, classes I and II, domain containing protein, expressed
Seita.3G137600	black	no	948.536	0.250492	AT5G55190.1	ATRAN3,RAN3	RAN GTPase 3	LOC_Os05g49890.1	--	ras-related protein, putative, expressed
Seita.7G048400	black	no	952.787	0.248144	AT2G37280.1	ATPDR5,PDR5	pleiotropic drug resistance 5	LOC_Os12g13720.1	--	Plant PDR ABC transporter associated domain containing protein, expressed
Seita.2G426600	black	no	844.154	0.247084	AT4G15770.1	--	RNA binding	LOC_Os07g47420.1	--	60S ribosome subunit biogenesis protein NIP7, putative, expressed
Seita.9G098800	black	no	946.579	0.243586	AT3G22300.1	RPS10	ribosomal protein S10	LOC_Os12g33240.2	--	mitochondrial ribosomal protein S10, putative, expressed
Seita.9G567400	black	no	949.176	0.242816	AT3G61060.1	AtPP2-A13,PP2-A13	phloem protein 2-A13	LOC_Os03g02550.1	--	OsFBX76 - F-box domain containing protein, expressed
Seita.7G217400	black	no	882.681	0.241566	AT1G78800.1	--	UDP-Glycosyltransferase superfamily protein	LOC_Os04g49960.1	--	glycosyl transferase, group 1 domain containing protein, expressed
Seita.6G091100	black	no	885.688	0.241028	AT3G11470.1	--	4\'-phosphopantetheinyl transferase superfamily	LOC_Os08g14490.1	--	dehydrogenase-phosphopantetheinyltransferase, putative, expressed
Seita.2G010100	black	no	945.989	0.240857	AT2G34930.1	--	disease resistance family protein / LRR family protein	LOC_Os11g35890.1	--	leucine rich repeat protein, putative, expressed
Seita.6G095800	black	no	942.904	0.238776	AT5G57690.1	ATDGK4,DGK4	diacylglycerol kinase 4	LOC_Os08g15090.1	--	diacylglycerol kinase catalytic domain family protein, expressed
Seita.5G463400	black	no	839.119	0.235852	AT1G28490.1	ATSYP61,OSM1,SYP61	syntaxin of plants 61	LOC_Os01g73230.1	--	syntaxin 6, putative, expressed
Seita.1G264500	black	no	878.716	0.235388	AT2G45910.1	--	U-box domain-containing protein kinase family protein	LOC_Os02g57700.1	--	protein kinase, putative, expressed
Seita.2G081200	black	no	908.627	0.230716	AT4G36790.1	--	Major facilitator superfamily protein	LOC_Os07g10820.1	--	transporter-related, putative, expressed
Seita.7G322600	black	no	991.331	0.222652	AT1G54920.2	--	--	LOC_Os11g05100.1	--	nucleolar GTPase, putative, expressed
Seita.5G464500	black	no	927.41	0.222225	AT3G18680.1	--	Amino acid kinase family protein	LOC_Os01g73450.1	--	amino acid kinase, putative, expressed
Seita.8G031700	black	no	1062.08	0.214555	AT1G54920.2	--	--	LOC_Os11g05100.1	--	nucleolar GTPase, putative, expressed
Seita.3G175400	black	no	828.014	0.20786	AT3G16310.1	--	mitotic phosphoprotein N\' end (MPPN) family protein	LOC_Os05g44380.1	--	MPPN domain containing protein, expressed
Seita.3G380700	black	no	789.933	0.204246	--	--	--	--	--	--
Seita.7G254500	black	no	983.51	0.20205	AT2G03870.2	--	Small nuclear ribonucleoprotein family protein	LOC_Os08g08040.1	--	LSM domain containing protein, expressed
Seita.J000200	black	no	753.488	0.194866	AT5G19440.1	--	NAD(P)-binding Rossmann-fold superfamily protein	LOC_Os01g34480.1	--	NAD dependent epimerase/dehydratase family protein, putative, expressed
Seita.1G182100	black	no	761.195	0.179607	AT5G51700.1	ATRAR1,PBS2,RAR1,RPR2	protein binding;zinc ion binding	LOC_Os02g33180.1	--	rar1, putative, expressed
Seita.4G133700	black	no	803.443	0.178434	AT3G05327.1	--	Cyclin family protein	LOC_Os05g26070.1	--	cyclin, putative, expressed
Seita.9G203500	black	no	715.107	0.148012	AT4G28360.1	--	Ribosomal protein L22p/L17e family protein	LOC_Os01g42980.1	--	ribosomal protein L22, putative, expressed
Seita.5G450700	black	no	722.253	0.144759	AT3G10210.1	--	SEC14 cytosolic factor family protein / phosphoglyceride transfer family protein	LOC_Os01g71980.1	--	rho-GTPase-activating protein-like, putative, expressed
Seita.2G413300	black	no	785.585	0.139361	--	--	--	--	--	--
Seita.4G113600	black	no	702.598	0.138684	--	--	--	--	--	--
Seita.7G078700	black	no	540.014	0.00745066	--	--	--	--	--	--
Seita.3G201100	black	no	496.212	0.00736796	AT2G38640.1	--	Protein of unknown function (DUF567)	LOC_Os05g40630.1	--	DUF567 domain containing protein, putative, expressed
Seita.7G184800	black	no	528.356	0.00652997	AT3G45210.1	--	Protein of unknown function, DUF584	LOC_Os04g45834.1	--	DUF584 domain containing protein, putative, expressed
Seita.1G116600	black	no	558.719	0.00634643	AT5G64700.1	--	nodulin MtN21 /EamA-like transporter family protein	LOC_Os12g18960.1	--	integral membrane protein DUF6 containing protein, expressed
Seita.7G300700	black	no	737.015	0.00572944	AT5G58350.1	WNK4,ZIK2	with no lysine (K) kinase 4	LOC_Os12g02250.1	--	STE_PAK_Ste20_Slob_Wnk.3 - STE kinases include homologs to sterile 7, sterile 11 and sterile 20 from yeast, expressed
Seita.3G176900	black	no	822.244	0.00524182	AT1G78580.1	ATTPS1,TPS1	trehalose-6-phosphate synthase	LOC_Os05g44210.1	--	trehalose-6-phosphate synthase, putative, expressed
Seita.3G132400	black	no	622.705	0.00458875	AT2G42900.1	--	Plant basic secretory protein (BSP) family protein	LOC_Os05g50500.1	--	secretory protein, putative, expressed
Seita.1G239400	blue	yes	3706.78	1	AT3G23250.1	ATMYB15,ATY19,MYB15	myb domain protein 15	LOC_Os02g41510.1	--	MYB family transcription factor, putative, expressed
Seita.5G329500	blue	yes	3686.5	0.999958	AT4G37390.1	AUR3,BRU6,GH3-2,GH3.2,YDK1	Auxin-responsive GH3 family protein	LOC_Os01g55940.1	--	OsGH3.2 - Probable indole-3-acetic acid-amido synthetase, expressed
Seita.2G223700	blue	yes	3651.45	0.994914	AT2G31945.1	--	--	LOC_Os09g27410.1	--	expressed protein
Seita.3G228200	blue	yes	3661.07	0.994316	--	--	--	LOC_Os05g36140.1	--	expressed protein
Seita.3G235000	blue	yes	3657.04	0.990979	AT5G06730.1	--	Peroxidase superfamily protein	LOC_Os03g13180.1	--	peroxidase precursor, putative, expressed
Seita.2G015400	blue	yes	3697.26	0.988346	AT2G03220.1	ATFT1,ATFUT1,FT1,MUR2	fucosyltransferase 1	LOC_Os08g24750.1	--	xyloglucan fucosyltransferase, putative, expressed
Seita.1G205000	blue	yes	3639.09	0.988049	AT1G34580.1	--	Major facilitator superfamily protein	LOC_Os02g36414.1	--	transporter family protein, putative, expressed
Seita.7G086700	blue	yes	3728.62	0.987534	AT1G52340.1	ABA2,ATABA2,ATSDR1,GIN1,ISI4,SDR1,SIS4,SRE1	NAD(P)-binding Rossmann-fold superfamily protein	LOC_Os04g33240.1	--	sex determination protein tasselseed-2, putative, expressed
Seita.1G284100	blue	yes	3690.64	0.987413	AT2G02040.1	ATPTR2,ATPTR2-B,NTR1,PTR2,PTR2-B	peptide transporter 2	LOC_Os02g47090.1	--	peptide transporter PTR2, putative, expressed
Seita.9G024600	blue	yes	3629.73	0.98738	AT1G14870.1	PCR2	PLANT CADMIUM RESISTANCE 2	LOC_Os03g61470.1	--	uncharacterized Cys-rich domain containing protein, putative, expressed
Seita.2G412200	blue	yes	3671.31	0.986989	AT3G21520.1	AtDMP1,DMP1	DUF679 domain membrane protein 1	LOC_Os07g45080.1	--	expressed protein
Seita.3G053100	blue	yes	3616.94	0.986704	AT4G36430.1	--	Peroxidase superfamily protein	LOC_Os05g04490.1	--	peroxidase precursor, putative, expressed
Seita.3G052900	blue	yes	3629.77	0.985654	AT4G36430.1	--	Peroxidase superfamily protein	LOC_Os05g04490.1	--	peroxidase precursor, putative, expressed
Seita.7G324000	blue	yes	3681.77	0.985006	AT3G52780.1	ATPAP20,PAP20	Purple acid phosphatases superfamily protein	LOC_Os12g05540.1	--	Ser/Thr protein phosphatase family protein, putative, expressed
Seita.2G370900	blue	yes	3689.92	0.98451	AT1G59590.1	ZCF37	ZCF37	LOC_Os07g39720.1	--	expressed protein
Seita.6G194500	blue	yes	3695.53	0.982578	AT5G56040.2	--	Leucine-rich receptor-like protein kinase family protein	LOC_Os08g38560.1	--	receptor-like protein kinase 2 precursor, putative, expressed
Seita.9G281800	blue	yes	3643.2	0.982167	AT2G45550.1	CYP76C4	cytochrome P450, family 76, subfamily C, polypeptide 4	LOC_Os10g08319.1	--	cytochrome P450, putative, expressed
Seita.6G127300	blue	yes	3660.61	0.982036	AT3G21360.1	--	2-oxoglutarate (2OG) and Fe(II)-dependent oxygenase superfamily protein	LOC_Os08g29510.1	--	expressed protein
Seita.2G198800	blue	yes	3629.43	0.981706	AT4G37980.1	ATCAD7,CAD7,ELI3,ELI3-1	elicitor-activated gene 3-1	LOC_Os09g23530.1	--	dehydrogenase, putative, expressed
Seita.7G043900	blue	yes	3673.47	0.980628	AT5G52450.1	--	MATE efflux family protein	LOC_Os04g30490.1	--	MATE efflux family protein, putative, expressed
Seita.5G443300	blue	yes	3607.33	0.980627	AT3G50700.1	AtIDD2,IDD2	indeterminate(ID)-domain 2	LOC_Os01g70870.1	--	ZOS1-23 - C2H2 zinc finger protein, expressed
Seita.3G237900	blue	yes	3642.54	0.979946	AT2G42990.1	--	GDSL-like Lipase/Acylhydrolase superfamily protein	LOC_Os09g04624.1	--	GDSL-like lipase/acylhydrolase, putative, expressed
Seita.5G430700	blue	yes	3657.57	0.979902	AT1G14590.1	--	Nucleotide-diphospho-sugar transferase family protein	LOC_Os01g69190.1	--	regulatory protein, putative, expressed
Seita.4G110100	blue	yes	3653.92	0.97954	--	--	--	LOC_Os06g13940.1	--	expressed protein
Seita.1G166500	blue	yes	3594.52	0.97945	AT2G24200.2	--	Cytosol aminopeptidase family protein	LOC_Os02g55140.1	--	leucine aminopeptidase, chloroplast precursor, putative, expressed
Seita.6G008400	blue	yes	3700.5	0.978836	AT1G21360.1	GLTP2	glycolipid transfer protein 2	LOC_Os08g01710.1	--	GLTP domain containing protein, putative, expressed
Seita.9G242400	blue	yes	3610.43	0.978742	--	--	--	LOC_Os10g34760.1	--	RIPER3 - Ripening-related family protein precursor, putative, expressed
Seita.2G337400	blue	yes	3639.85	0.977882	AT3G03800.1	ATSYP131,SYP131	syntaxin of plants 131	LOC_Os07g07000.1	--	syntaxin, putative, expressed
Seita.6G231200	blue	yes	3595.98	0.977806	AT1G20480.1	--	AMP-dependent synthetase and ligase family protein	LOC_Os04g39780.1	--	AMP-binding enzyme family protein, expressed
Seita.5G132700	blue	yes	3665.86	0.976885	AT5G15130.1	ATWRKY72,WRKY72	WRKY DNA-binding protein 72	LOC_Os01g09080.1	--	WRKY107, expressed
Seita.3G206900	blue	yes	3573.22	0.976859	AT2G38470.1	ATWRKY33,WRKY33	WRKY DNA-binding protein 33	LOC_Os05g39720.1	--	WRKY70, expressed
Seita.7G050200	blue	yes	3673.75	0.97644	AT1G22360.1	AtUGT85A2,UGT85A2	UDP-glucosyl transferase 85A2	LOC_Os04g25980.1	--	cytokinin-O-glucosyltransferase 2, putative, expressed
Seita.8G131900	blue	yes	3607.48	0.975804	AT1G71830.1	ATSERK1,SERK1	somatic embryogenesis receptor-like kinase 1	LOC_Os11g31540.1	--	BRASSINOSTEROID INSENSITIVE 1-associated receptor kinase 1 precursor, putative, expressed
Seita.2G151100	blue	yes	3699.43	0.975722	AT5G45860.1	PYL11,RCAR5	PYR1-like 11	LOC_Os04g50700.1	--	pathogenesis-related Bet v I family protein, putative, expressed
Seita.1G274500	blue	yes	3674.31	0.974919	AT5G07010.1	ATST2A,ST2A	sulfotransferase 2A	LOC_Os02g45890.1	--	sulfotransferase domain containing protein, expressed
Seita.1G170700	blue	yes	3677.39	0.974627	AT5G50760.1	--	SAUR-like auxin-responsive protein family	LOC_Os02g30810.1	--	OsSAUR10 - Auxin-responsive SAUR gene family member, expressed
Seita.5G049000	blue	yes	3660.66	0.974556	AT1G47710.1	--	Serine protease inhibitor (SERPIN) family protein	LOC_Os01g16200.1	--	serpin domain containing protein, putative, expressed
Seita.2G043900	blue	yes	3599.47	0.974399	AT2G32300.1	UCC1	uclacyanin 1	LOC_Os07g07170.1	--	plastocyanin-like domain containing protein, putative, expressed
Seita.9G509800	blue	yes	3650.85	0.974083	AT2G44610.1	ATRAB6A,ATRABH1B,RAB6,RAB6A	Ras-related small GTP-binding family protein	LOC_Os03g09140.1	--	ras-related protein, putative, expressed
Seita.3G200500	blue	yes	3582	0.973462	AT3G54220.1	SCR,SGR1	GRAS family transcription factor	LOC_Os05g40710.1	--	DELLA protein GAI, putative, expressed
Seita.1G334400	blue	yes	3662.83	0.97324	AT1G68150.1	ATWRKY9,WRKY9	WRKY DNA-binding protein 9	LOC_Os02g53100.1	--	WRKY32, expressed
Seita.5G455600	blue	yes	3651.23	0.973024	AT5G12340.1	--	--	LOC_Os01g72360.1	--	expressed protein
Seita.2G113100	blue	yes	3578.7	0.972859	AT5G43540.1	--	C2H2 and C2HC zinc fingers superfamily protein	LOC_Os07g23450.1	--	ZOS7-04 - C2H2 zinc finger protein, expressed
Seita.7G223900	blue	yes	3547.48	0.972718	AT3G22370.1	AOX1A,ATAOX1A	alternative oxidase 1A	LOC_Os04g51160.1	--	transposon protein, putative, unclassified, expressed
Seita.9G286100	blue	yes	3577.05	0.972441	AT3G21850.1	ASK9,SK9	SKP1-like 9	LOC_Os07g05180.1	--	Skp1 family, dimerisation domain containing protein, expressed
Seita.3G010800	blue	yes	3528.42	0.972266	AT1G54830.3	NF-YC3	nuclear factor Y, subunit C3	LOC_Os04g58680.1	--	core histone H2A/H2B/H3/H4, putative, expressed
Seita.8G006600	blue	yes	3708.4	0.972121	AT5G65090.1	BST1,DER4,MRH3	DNAse I-like superfamily protein	LOC_Os05g41000.1	--	endonuclease/exonuclease/phosphatase family domain containing protein, expressed
Seita.2G339600	blue	yes	3544.59	0.972105	AT2G03200.1	--	Eukaryotic aspartyl protease family protein	LOC_Os07g34850.1	--	aspartic proteinase nepenthesin, putative, expressed
Seita.8G216500	blue	yes	3581.91	0.97198	AT5G06060.1	--	NAD(P)-binding Rossmann-fold superfamily protein	LOC_Os11g43200.1	--	tropinone reductase 2, putative, expressed
Seita.9G024200	blue	yes	3613.43	0.971857	AT3G05600.1	--	alpha/beta-Hydrolases superfamily protein	LOC_Os03g61360.1	--	hydrolase, alpha/beta fold family domain containing protein, expressed
Seita.9G235000	blue	yes	3675.92	0.971789	--	--	--	LOC_Os10g31640.1	--	glycine-rich cell wall structural protein 2 precursor, putative, expressed
Seita.7G198500	blue	yes	3572.35	0.971506	AT5G55050.1	--	GDSL-like Lipase/Acylhydrolase superfamily protein	LOC_Os04g47390.1	--	GDSL-like lipase/acylhydrolase, putative, expressed
Seita.5G246800	blue	yes	3611.34	0.971347	AT4G24130.1	--	Protein of unknown function, DUF538	LOC_Os01g46390.1	--	DUF538 domain containing protein, putative, expressed
Seita.8G034600	blue	yes	3729.76	0.97123	AT1G08320.1	bZIP21,TGA9	bZIP transcription factor family protein	LOC_Os11g05480.1	--	transcription factor, putative, expressed
Seita.7G139200	blue	yes	3561.01	0.971135	AT3G26310.1	CYP71B35	cytochrome P450, family 71, subfamily B, polypeptide 35	LOC_Os04g40470.1	--	cytochrome P450, putative, expressed
Seita.1G104700	blue	yes	3576.8	0.971041	AT2G38870.1	--	Serine protease inhibitor, potato inhibitor I-type family protein	LOC_Os02g03190.1	--	inhibitor I family protein, putative, expressed
Seita.4G224700	blue	yes	3646.47	0.971037	AT2G26710.1	BAS1,CYP72B1,CYP734A1	Cytochrome P450 superfamily protein	LOC_Os02g11020.1	--	cytochrome P450 72A1, putative, expressed
Seita.5G434700	blue	yes	3655.02	0.970958	AT5G41040.1	--	HXXXD-type acyl-transferase family protein	LOC_Os11g31090.1	--	transferase family protein, putative, expressed
Seita.2G279800	blue	yes	3624.72	0.970793	AT4G25470.1	ATCBF2,CBF2,DREB1C,FTQ4	C-repeat/DRE binding factor 2	LOC_Os09g35010.1	--	dehydration-responsive element-binding protein, putative, expressed
Seita.3G368800	blue	yes	3656.36	0.970729	AT5G19790.1	RAP2.11	related to AP2 11	LOC_Os12g39330.1	--	AP2 domain containing protein, expressed
Seita.3G292000	blue	yes	3670.74	0.970648	AT3G62160.1	--	HXXXD-type acyl-transferase family protein	LOC_Os05g19910.1	--	transferase family protein, putative, expressed
Seita.2G407100	blue	yes	3653.68	0.970588	AT4G33420.1	--	Peroxidase superfamily protein	LOC_Os07g44480.1	--	peroxidase, putative, expressed
Seita.4G036200	blue	yes	3544.92	0.970437	AT2G46950.1	CYP709B2	cytochrome P450, family 709, subfamily B, polypeptide 2	LOC_Os06g09210.1	--	cytochrome P450 72A1, putative, expressed
Seita.1G105500	blue	yes	3619.91	0.970125	AT2G38870.1	--	Serine protease inhibitor, potato inhibitor I-type family protein	LOC_Os08g34249.1	--	inhibitor I family protein, putative, expressed
Seita.7G309000	blue	yes	3514.2	0.969798	AT2G27080.2	--	Late embryogenesis abundant (LEA) hydroxyproline-rich glycoprotein family	LOC_Os12g03370.1	--	harpin-induced protein 1 domain containing protein, expressed
Seita.5G396900	blue	yes	3642.22	0.9695	AT3G54450.1	--	Major facilitator superfamily protein	LOC_Os01g65190.1	--	POT domain containing peptide transporter, putative, expressed
Seita.5G395800	blue	yes	3517.21	0.968932	AT2G38290.1	AMT2,AMT2;1,ATAMT2	ammonium transporter 2	LOC_Os01g65000.1	--	ammonium transporter protein, putative, expressed
Seita.3G341500	blue	yes	3575.2	0.968771	AT2G02120.1	LCR70,PDF2.1	Scorpion toxin-like knottin superfamily protein	--	--	--
Seita.3G137800	blue	yes	3650.13	0.968694	AT4G18550.1	--	alpha/beta-Hydrolases superfamily protein	LOC_Os05g49840.1	--	phospholipase, putative, expressed
Seita.5G234800	blue	yes	3665.64	0.968422	AT3G14690.1	CYP72A15	cytochrome P450, family 72, subfamily A, polypeptide 15	LOC_Os01g43750.1	--	cytochrome P450 72A1, putative, expressed
Seita.8G129500	blue	yes	3585.01	0.967928	AT1G66350.1	RGL,RGL1	RGA-like 1	LOC_Os11g31100.1	--	gibberellin response modulator protein, putative, expressed
Seita.4G200200	blue	yes	3557.67	0.967487	AT2G12400.1	--	--	LOC_Os06g43780.1	--	expressed protein
Seita.9G157600	blue	yes	3551.93	0.966735	AT1G17170.1	ATGSTU24,GST,GSTU24	glutathione S-transferase TAU 24	LOC_Os03g44170.1	--	glutathione S-transferase, putative, expressed
Seita.9G544200	blue	yes	3585.53	0.966408	AT5G60710.1	--	Zinc finger (C3HC4-type RING finger) family protein	LOC_Os08g03270.1	--	zinc finger family protein, putative, expressed
Seita.3G290500	blue	yes	3620.16	0.96635	AT4G20780.1	CML42	calmodulin like 42	LOC_Os05g24780.1	--	OsCML21 - Calmodulin-related calcium sensor protein, expressed
Seita.9G019300	blue	yes	3597.33	0.965405	AT1G34370.1	STOP1	C2H2 and C2HC zinc fingers superfamily protein	LOC_Os03g62230.1	--	ZOS3-24 - C2H2 zinc finger protein, expressed
Seita.3G331000	blue	yes	3583.69	0.965017	AT4G29990.1	--	Leucine-rich repeat transmembrane protein kinase protein	LOC_Os12g37980.1	--	protein kinase domain containing protein, expressed
Seita.2G187900	blue	yes	3566.63	0.964623	AT4G13830.2	J20	DNAJ-like 20	LOC_Os09g20320.1	--	heat shock protein DnaJ, putative, expressed
Seita.1G061000	blue	yes	3638.81	0.964593	AT5G25160.1	ZFP3	zinc finger protein 3	LOC_Os02g08510.1	--	ZOS2-04 - C2H2 zinc finger protein, expressed
Seita.5G008400	blue	yes	3539.92	0.964533	AT3G06880.2	--	Transducin/WD40 repeat-like superfamily protein	LOC_Os01g12930.1	--	U-box domain containing protein, expressed
Seita.5G287700	blue	yes	3586.8	0.964234	AT1G18980.1	--	RmlC-like cupins superfamily protein	LOC_Os01g50900.1	--	Cupin domain containing protein, expressed
Seita.9G256000	blue	yes	3608.01	0.964156	AT2G20340.1	--	Pyridoxal phosphate (PLP)-dependent transferases superfamily protein	LOC_Os10g26110.1	--	decarboxylase, putative, expressed
Seita.7G028300	blue	yes	3552.8	0.963963	AT5G14180.1	MPL1	Myzus persicae-induced lipase 1	LOC_Os04g21160.1	--	triacylglycerol lipase 1 precursor, putative, expressed
Seita.6G164300	blue	yes	3646.52	0.963677	AT5G48930.1	HCT	hydroxycinnamoyl-CoA shikimate/quinate hydroxycinnamoyl transferase	LOC_Os09g25460.1	--	transferase family protein, putative, expressed
Seita.2G198700	blue	yes	3591.18	0.963173	AT4G39330.1	ATCAD9,CAD9	cinnamyl alcohol dehydrogenase 9	LOC_Os09g23560.1	--	dehydrogenase, putative, expressed
Seita.8G233600	blue	yes	3612.95	0.962934	AT2G22570.1	ATNIC1,NIC1	nicotinamidase 1	LOC_Os02g39400.1	--	isochorismatase family protein, putative, expressed
Seita.6G038400	blue	yes	3605.01	0.962925	AT5G39110.1	--	RmlC-like cupins superfamily protein	LOC_Os08g08990.1	--	Cupin domain containing protein, expressed
Seita.7G198400	blue	yes	3544.61	0.962772	AT1G71691.2	--	GDSL-like Lipase/Acylhydrolase superfamily protein	LOC_Os04g47390.1	--	GDSL-like lipase/acylhydrolase, putative, expressed
Seita.1G149200	blue	yes	3693.7	0.9627	AT4G22810.1	--	Predicted AT-hook DNA-binding family protein	LOC_Os02g25020.1	--	DNA binding protein, putative, expressed
Seita.9G151600	blue	yes	3496.53	0.962554	AT1G07710.1	--	Ankyrin repeat family protein	LOC_Os03g45290.1	--	ankyrin repeat domain-containing protein 50, putative, expressed
Seita.5G392200	blue	yes	3594.85	0.962499	AT2G35980.1	ATNHL10,NHL10,YLS9	Late embryogenesis abundant (LEA) hydroxyproline-rich glycoprotein family	LOC_Os01g64470.1	--	harpin-induced protein 1 domain containing protein, expressed
Seita.2G298400	blue	yes	3661.06	0.962464	AT1G19250.1	FMO1	flavin-dependent monooxygenase 1	LOC_Os09g37690.1	--	flavin-containing monooxygenase family protein, putative, expressed
Seita.1G185100	blue	yes	3617.13	0.962174	AT2G35930.1	PUB23	plant U-box 23	LOC_Os02g33590.1	--	U-box domain-containing protein, putative, expressed
Seita.1G286600	blue	yes	3620.52	0.962081	AT1G31830.1	--	Amino acid permease family protein	LOC_Os02g47210.1	--	amino acid permease family protein, putative, expressed
Seita.9G211900	blue	yes	3528.56	0.962068	--	--	--	LOC_Os10g34760.1	--	RIPER3 - Ripening-related family protein precursor, putative, expressed
Seita.8G140500	blue	yes	3554.64	0.962048	AT3G26690.1	ATNUDT13,ATNUDX13,NUDX13	nudix hydrolase homolog 13	LOC_Os11g32750.1	--	hydrolase, NUDIX family, domain containing protein, expressed
Seita.4G134600	blue	yes	3581.54	0.961917	AT1G27480.1	--	alpha/beta-Hydrolases superfamily protein	LOC_Os01g71800.1	--	lecithin cholesterol acyltransferase, putative, expressed
Seita.1G204900	blue	yes	3593.71	0.961646	AT1G34580.1	--	Major facilitator superfamily protein	LOC_Os02g36414.1	--	transporter family protein, putative, expressed
Seita.2G033500	blue	yes	3621.75	0.961397	AT1G17180.1	ATGSTU25,GSTU25	glutathione S-transferase TAU 25	LOC_Os09g20220.1	--	glutathione S-transferase, putative, expressed
Seita.7G333900	blue	yes	3622.45	0.960999	--	--	--	LOC_Os10g33500.1	--	expressed protein
Seita.J029300	blue	yes	3548.69	0.960661	AT4G21380.1	ARK3,RK3	receptor kinase 3	LOC_Os09g37840.1	--	carbohydrate binding protein, putative, expressed
Seita.J002700	blue	yes	3662.8	0.960361	AT2G32300.1	UCC1	uclacyanin 1	LOC_Os07g01440.1	--	plastocyanin-like domain containing protein, putative, expressed
Seita.9G001100	blue	yes	3598.52	0.959366	AT2G36380.1	ATPDR6,PDR6	pleiotropic drug resistance 6	LOC_Os11g37700.1	--	pleiotropic drug resistance protein, putative, expressed
Seita.2G071100	blue	yes	3620.34	0.959266	AT1G74790.1	--	catalytics	LOC_Os07g09520.1	--	expressed protein
Seita.5G199900	blue	yes	3586.7	0.959207	--	--	--	LOC_Os01g37810.1	--	expressed protein
Seita.2G181200	blue	yes	3534.54	0.95873	AT2G25737.1	--	Sulfite exporter TauE/SafE family protein	LOC_Os09g17600.2	--	membrane protein, putative, expressed
Seita.7G238900	blue	yes	3613.49	0.95863	AT3G05950.1	--	RmlC-like cupins superfamily protein	LOC_Os04g52720.1	--	Cupin domain containing protein, expressed
Seita.9G367800	blue	yes	3662.38	0.95827	AT1G17020.1	ATSRG1,SRG1	senescence-related gene 1	LOC_Os03g32470.1	--	leucoanthocyanidin dioxygenase, putative, expressed
Seita.3G283000	blue	yes	3579.85	0.958044	AT3G45680.1	--	Major facilitator superfamily protein	LOC_Os05g27304.1	--	peptide transporter PTR2, putative, expressed
Seita.5G171200	blue	yes	3694.67	0.957997	AT3G62760.1	ATGSTF13	Glutathione S-transferase family protein	LOC_Os01g27390.1	--	glutathione S-transferase, putative, expressed
Seita.6G172000	blue	yes	3547.4	0.957787	--	--	--	LOC_Os08g35580.1	--	expressed protein
Seita.4G180100	blue	yes	3536.06	0.957636	AT4G18910.1	ATNLM2,NIP1;2,NLM2	NOD26-like intrinsic protein 1;2	LOC_Os06g35930.1	--	aquaporin protein, putative, expressed
Seita.1G163000	blue	yes	3625.78	0.957365	AT1G73280.1	scpl3	serine carboxypeptidase-like 3	LOC_Os11g24510.1	--	OsSCP56 - Putative Serine Carboxypeptidase homologue, expressed
Seita.7G119800	blue	yes	3624.06	0.957128	AT1G34580.1	--	Major facilitator superfamily protein	LOC_Os04g37980.1	--	transporter family protein, putative, expressed
Seita.5G341600	blue	yes	3525.11	0.957105	--	--	--	LOC_Os01g57400.1	--	lysM domain containing protein, putative
Seita.8G048800	blue	yes	3449.35	0.957097	AT3G14470.1	--	NB-ARC domain-containing disease resistance protein	LOC_Os11g28950.1	--	pollen signalling protein with adenylyl cyclase activity, putative, expressed
Seita.7G118600	blue	yes	3497.37	0.956997	AT4G40020.1	--	Myosin heavy chain-related protein	LOC_Os04g37790.1	--	expressed protein
Seita.1G080400	blue	yes	3557.33	0.956535	--	--	--	LOC_Os02g06440.1	--	expressed protein
Seita.4G206600	blue	yes	3600.19	0.956522	AT3G25070.1	RIN4	RPM1 interacting protein 4	LOC_Os06g43000.1	--	nitrate-induced NOI protein, expressed
Seita.8G149100	blue	yes	3552.26	0.956505	AT5G19000.1	ATBPM1,BPM1	BTB-POZ and MATH domain 1	LOC_Os01g06740.1	--	ribosome inactivating protein, putative, expressed
Seita.5G359200	blue	yes	3465.3	0.956359	AT1G79620.1	--	Leucine-rich repeat protein kinase family protein	LOC_Os01g60060.1	--	leucine-rich repeat family protein, putative, expressed
Seita.8G203000	blue	yes	3625.82	0.95582	AT5G10190.1	--	Major facilitator superfamily protein	LOC_Os08g31700.1	--	UNE2, putative, expressed
Seita.9G229900	blue	yes	3517.49	0.955792	AT5G60710.1	--	Zinc finger (C3HC4-type RING finger) family protein	LOC_Os10g32760.1	--	zinc finger family protein, putative, expressed
Seita.5G164800	blue	yes	3596.79	0.955686	AT5G66390.1	--	Peroxidase superfamily protein	LOC_Os04g34630.1	--	peroxidase precursor, putative, expressed
Seita.4G090900	blue	yes	3637	0.955464	AT1G22340.1	AtUGT85A7,UGT85A7	UDP-glucosyl transferase 85A7	LOC_Os06g11720.1	--	cytokinin-O-glucosyltransferase 2, putative, expressed
Seita.8G099600	blue	yes	3493.76	0.955442	--	--	--	--	--	--
Seita.6G038600	blue	yes	3616.24	0.955047	AT5G39110.1	--	RmlC-like cupins superfamily protein	LOC_Os08g08990.1	--	Cupin domain containing protein, expressed
Seita.2G431600	blue	yes	3512.46	0.954768	AT5G05340.1	--	Peroxidase superfamily protein	LOC_Os07g48060.1	--	peroxidase precursor, putative, expressed
Seita.2G139500	blue	yes	3507.73	0.953656	AT2G32300.1	UCC1	uclacyanin 1	LOC_Os09g39940.1	--	plastocyanin-like domain containing protein, putative, expressed
Seita.2G039200	blue	yes	3478.24	0.953256	AT1G68450.1	--	VQ motif-containing protein	LOC_Os07g06790.1	--	VQ domain containing protein, putative, expressed
Seita.4G197100	blue	yes	3421.23	0.952934	AT4G31800.2	ATWRKY18,WRKY18	WRKY DNA-binding protein 18	LOC_Os06g44010.1	--	WRKY28, expressed
Seita.5G152900	blue	yes	3456.53	0.952891	AT5G45910.1	--	GDSL-like Lipase/Acylhydrolase superfamily protein	LOC_Os01g11650.1	--	GDSL-like lipase/acylhydrolase, putative, expressed
Seita.9G288700	blue	yes	3608.5	0.952678	AT2G45550.1	CYP76C4	cytochrome P450, family 76, subfamily C, polypeptide 4	LOC_Os08g39730.1	--	cytochrome P450, putative, expressed
Seita.8G090900	blue	yes	3581.69	0.952566	AT2G36690.1	--	2-oxoglutarate (2OG) and Fe(II)-dependent oxygenase superfamily protein	LOC_Os08g44590.1	--	gibberellin 20 oxidase 2, putative, expressed
Seita.6G181700	blue	yes	3550.77	0.952447	AT4G34410.1	RRTF1	redox responsive transcription factor 1	LOC_Os08g36920.1	--	AP2 domain containing protein, expressed
Seita.9G021400	blue	yes	3497.63	0.952305	AT1G19630.1	CYP722A1	cytochrome P450, family 722, subfamily A, polypeptide 1	LOC_Os03g61980.1	--	cytochrome P450, putative, expressed
Seita.5G236700	blue	yes	3611.82	0.950473	--	--	--	LOC_Os01g44120.1	--	expressed protein
Seita.7G038600	blue	yes	3562.9	0.950027	AT5G45890.1	SAG12	senescence-associated gene 12	LOC_Os04g13090.1	--	vignain precursor, putative, expressed
Seita.5G466400	blue	yes	3513.02	0.950016	AT3G19430.1	--	late embryogenesis abundant protein-related / LEA protein-related	LOC_Os01g73730.1	--	RCLEA5 - Root cap and Late embryogenesis related family protein precursor, expressed
Seita.1G125700	blue	yes	3524.4	0.949988	AT3G23730.1	XTH16	xyloglucan endotransglucosylase/hydrolase 16	LOC_Os02g17900.1	--	glycosyl hydrolases family 16, putative, expressed
Seita.3G391600	blue	yes	3542.35	0.949935	AT3G17630.1	ATCHX19,CHX19	cation/H+ exchanger 19	LOC_Os12g42200.1	--	ATCHX, putative, expressed
Seita.9G518100	blue	yes	3488.1	0.949911	AT3G43440.1	JAZ11,TIFY3A	jasmonate-zim-domain protein 11	LOC_Os03g08310.1	--	ZIM domain containing protein, putative, expressed
Seita.5G284600	blue	yes	3466	0.949786	AT2G32510.1	MAPKKK17	mitogen-activated protein kinase kinase kinase 17	LOC_Os01g50420.1	--	STE_MEKK_ste11_MAP3K.7 - STE kinases include homologs to sterile 7, sterile 11 and sterile 20 from yeast, expressed
Seita.9G130300	blue	yes	3470.16	0.949729	AT3G26300.1	CYP71B34	cytochrome P450, family 71, subfamily B, polypeptide 34	LOC_Os09g10340.1	--	cytochrome P450, putative, expressed
Seita.8G216000	blue	yes	3479.44	0.949507	--	--	--	LOC_Os11g42960.1	--	integral membrane protein TIGR01569 containing protein, expressed
Seita.5G456800	blue	yes	3564.4	0.948182	AT1G76640.1	--	Calcium-binding EF-hand family protein	LOC_Os01g72530.1	--	OsCML31 - Calmodulin-related calcium sensor protein, expressed
Seita.7G032000	blue	yes	3560.39	0.948116	AT1G17840.1	ABCG11,ATWBC11,COF1,DSO,WBC11	white-brown complex homolog protein 11	LOC_Os07g18874.1	--	white-brown complex homolog protein 11, putative, expressed
Seita.4G163600	blue	yes	3546.55	0.947887	AT4G01250.1	AtWRKY22,WRKY22	WRKY family transcription factor	LOC_Os06g30860.1	--	WRKY31, expressed
Seita.3G380800	blue	yes	3455.22	0.947535	AT3G22930.1	CML11	calmodulin-like 11	LOC_Os12g41110.1	--	OsCML5 - Calmodulin-related calcium sensor protein, expressed
Seita.1G294800	blue	yes	3642.68	0.947023	AT1G76500.1	AHL29,SOB3	Predicted AT-hook DNA-binding family protein	LOC_Os02g48320.3	--	DNA binding protein, putative, expressed
Seita.7G163000	blue	yes	3502.69	0.946777	AT5G29000.2	--	Homeodomain-like superfamily protein	LOC_Os07g25710.2	--	myb-like DNA-binding domain containing protein, expressed
Seita.1G312900	blue	yes	3501.74	0.946556	--	--	--	LOC_Os02g50400.1	--	expressed protein
Seita.9G211600	blue	yes	3537.15	0.946278	--	--	--	LOC_Os02g42450.1	--	RIPER1 - Ripening-related family protein precursor, expressed
Seita.7G213100	blue	yes	3398.49	0.9461	AT1G29340.1	ATPUB17,PUB17	plant U-box 17	LOC_Os04g49500.1	--	U-box domain-containing protein, putative, expressed
Seita.3G123000	blue	yes	3478.28	0.945764	AT5G06300.1	--	Putative lysine decarboxylase family protein	LOC_Os05g51390.1	--	uncharacterized protein PA4923, putative, expressed
Seita.3G235100	blue	yes	3576.01	0.94554	AT5G06730.1	--	Peroxidase superfamily protein	LOC_Os03g13180.1	--	peroxidase precursor, putative, expressed
Seita.5G069100	blue	yes	3582.25	0.945381	AT3G04070.1	anac047,NAC047	NAC domain containing protein 47	LOC_Os03g21060.1	--	No apical meristem protein, putative, expressed
Seita.9G101700	blue	yes	3469.09	0.945369	AT2G38110.1	ATGPAT6,GPAT6	glycerol-3-phosphate acyltransferase 6	LOC_Os03g52570.1	--	glycerol-3-phosphate acyltransferase, putative, expressed
Seita.4G017500	blue	yes	3494.44	0.945342	AT5G17210.1	--	Protein of unknown function (DUF1218)	LOC_Os02g39510.1	--	expressed protein
Seita.6G029200	blue	yes	3645.81	0.945223	AT2G32210.1	--	--	LOC_Os08g10500.1	--	expressed protein
Seita.9G220900	blue	yes	3554.79	0.945219	AT3G17380.1	--	TRAF-like family protein	LOC_Os10g33830.1	--	MATH domain containing protein, expressed
Seita.6G012200	blue	yes	3539.14	0.945102	AT5G42830.1	--	HXXXD-type acyl-transferase family protein	LOC_Os08g01950.1	--	transferase family protein, putative, expressed
Seita.5G239500	blue	yes	3543.18	0.945087	AT2G15480.2	UGT73B5	UDP-glucosyl transferase 73B5	LOC_Os01g45110.1	--	anthocyanin 3-O-beta-glucosyltransferase, putative, expressed
Seita.2G254000	blue	yes	3608.98	0.944781	AT2G44480.1	BGLU17	beta glucosidase 17	LOC_Os09g31430.1	--	Os9bglu30 - beta-glucosidase, similar to Os4bglu12 exoglucanase, expressed
Seita.7G277200	blue	yes	3475.63	0.944515	AT2G38870.1	--	Serine protease inhibitor, potato inhibitor I-type family protein	LOC_Os12g36210.1	--	inhibitor I family protein, putative, expressed
Seita.7G022900	blue	yes	3579.32	0.943973	AT5G54160.1	ATOMT1,OMT1	O-methyltransferase 1	LOC_Os04g09654.1	--	O-methyltransferase, putative, expressed
Seita.1G104800	blue	yes	3463.45	0.943949	AT5G43580.1	--	Serine protease inhibitor, potato inhibitor I-type family protein	LOC_Os02g03170.1	--	inhibitor I family protein, putative, expressed
Seita.8G206800	blue	yes	3473.97	0.943746	--	--	--	--	--	--
Seita.9G018800	blue	yes	3554.71	0.943565	AT1G77400.1	--	--	LOC_Os03g62330.1	--	expressed protein
Seita.9G238400	blue	yes	3534.35	0.943481	AT3G54700.1	PHT1;7	phosphate transporter 1;7	LOC_Os10g30770.1	--	inorganic phosphate transporter, putative, expressed
Seita.1G082100	blue	yes	3455.9	0.943213	AT5G66170.3	STR18	sulfurtransferase 18	LOC_Os02g06290.2	--	rhodanese-like domain containing protein, putative, expressed
Seita.7G100800	blue	yes	3635.73	0.943145	AT3G03450.1	RGL2	RGA-like 2	LOC_Os04g35250.1	--	MONOCULM 1, putative, expressed
Seita.9G103500	blue	yes	3596.48	0.943037	AT3G57450.1	--	--	LOC_Os03g52410.1	--	expressed protein
Seita.4G187200	blue	yes	3454.57	0.942926	AT4G31250.1	--	Leucine-rich repeat protein kinase family protein	LOC_Os06g45240.1	--	inactive receptor kinase At2g26730 precursor, putative, expressed
Seita.1G240500	blue	yes	3530.95	0.942883	AT2G37040.1	ATPAL1,PAL1	PHE ammonia lyase 1	LOC_Os02g41680.1	--	phenylalanine ammonia-lyase, putative, expressed
Seita.1G294600	blue	yes	3610.8	0.942719	--	--	--	LOC_Os02g48280.1	--	expressed protein
Seita.9G417600	blue	yes	3603.34	0.942551	AT3G04070.1	anac047,NAC047	NAC domain containing protein 47	LOC_Os03g21060.1	--	No apical meristem protein, putative, expressed
Seita.7G228500	blue	yes	3526.71	0.942476	AT4G29905.1	--	--	LOC_Os04g51680.1	--	expressed protein
Seita.8G149600	blue	yes	3454.17	0.942452	AT5G36160.1	--	Tyrosine transaminase family protein	LOC_Os11g35040.1	--	aminotransferase, classes I and II, domain containing protein, expressed
Seita.3G250500	blue	yes	3477.02	0.942239	AT3G23570.1	--	alpha/beta-Hydrolases superfamily protein	LOC_Os05g33110.1	--	endo-1,3;1,4-beta-D-glucanase precursor, putative, expressed
Seita.3G274900	blue	yes	3399.36	0.941626	AT2G38870.1	--	Serine protease inhibitor, potato inhibitor I-type family protein	LOC_Os11g17790.1	--	inhibitor I family protein, putative, expressed
Seita.6G055000	blue	yes	3500.42	0.941588	AT5G44440.1	--	FAD-binding Berberine family protein	LOC_Os08g06190.1	--	berberine and berberine like domain containing protein, expressed
Seita.4G206000	blue	yes	3522.35	0.941563	--	--	--	LOC_Os06g43080.1	--	expressed protein
Seita.9G170100	blue	yes	3466.66	0.941414	AT5G19790.1	RAP2.11	related to AP2 11	LOC_Os12g39330.1	--	AP2 domain containing protein, expressed
Seita.4G140700	blue	yes	3532.95	0.940797	AT1G76430.1	PHT1;9	phosphate transporter 1;9	LOC_Os06g21950.1	--	inorganic phosphate transporter, putative, expressed
Seita.8G123100	blue	yes	3541.7	0.940678	AT5G13080.1	ATWRKY75,WRKY75	WRKY DNA-binding protein 75	LOC_Os11g29870.1	--	WRKY72, expressed
Seita.3G203600	blue	yes	3441.84	0.940667	AT3G56400.1	ATWRKY70,WRKY70	WRKY DNA-binding protein 70	LOC_Os05g40080.1	--	WRKY54, expressed
Seita.1G139400	blue	yes	3550.5	0.940479	--	--	--	LOC_Os10g34902.1	--	RIPER9 - Ripening-related family protein precursor, putative, expressed
Seita.3G112600	blue	yes	3491.77	0.940468	AT4G33050.3	EDA39	calmodulin-binding family protein	LOC_Os05g10840.2	--	calmodulin-binding protein, putative, expressed
Seita.9G210800	blue	yes	3561.31	0.940422	--	--	--	LOC_Os02g42450.1	--	RIPER1 - Ripening-related family protein precursor, expressed
Seita.9G146000	blue	yes	3578.56	0.940412	AT1G52820.1	--	2-oxoglutarate (2OG) and Fe(II)-dependent oxygenase superfamily protein	LOC_Os05g50090.1	--	oxidoreductase, 2OG-FeII oxygenase domain containing protein, putative, expressed
Seita.3G391700	blue	yes	3458.33	0.940164	AT3G17630.1	ATCHX19,CHX19	cation/H+ exchanger 19	LOC_Os12g42200.1	--	ATCHX, putative, expressed
Seita.9G516600	blue	yes	3623.26	0.939795	AT1G72360.2	HRE1	Integrase-type DNA-binding superfamily protein	LOC_Os03g08500.1	--	AP2 domain containing protein, expressed
Seita.9G184200	blue	yes	3388.39	0.939254	AT4G05160.1	--	AMP-dependent synthetase and ligase family protein	LOC_Os03g05780.1	--	4-coumarate--CoA ligase-like 7, putative, expressed
Seita.4G017200	blue	yes	3476	0.939203	AT5G20400.1	--	2-oxoglutarate (2OG) and Fe(II)-dependent oxygenase superfamily protein	LOC_Os06g08041.1	--	iron/ascorbate-dependent oxidoreductase, putative, expressed
Seita.5G463000	blue	yes	3615.4	0.939143	AT1G18590.1	ATSOT17,ATST5C,SOT17	sulfotransferase 17	LOC_Os09g08190.1	--	sulfotransferase domain containing protein, expressed
Seita.8G129400	blue	yes	3448.82	0.939129	AT5G43580.1	--	Serine protease inhibitor, potato inhibitor I-type family protein	LOC_Os02g03190.1	--	inhibitor I family protein, putative, expressed
Seita.9G272400	blue	yes	3591.81	0.938694	AT4G36670.1	--	Major facilitator superfamily protein	LOC_Os10g21590.1	--	transporter family protein, putative, expressed
Seita.5G219400	blue	yes	3466.28	0.938611	--	--	--	LOC_Os01g42200.1	--	expressed protein
Seita.7G038100	blue	yes	3535.1	0.93849	AT5G45890.1	SAG12	senescence-associated gene 12	LOC_Os04g13090.1	--	vignain precursor, putative, expressed
Seita.3G225400	blue	yes	3517.04	0.938389	AT5G22380.1	anac090,NAC090	NAC domain containing protein 90	LOC_Os05g37080.1	--	No apical meristem protein, putative, expressed
Seita.1G166600	blue	yes	3470.28	0.938179	AT5G52400.1	CYP715A1	cytochrome P450, family 715, subfamily A, polypeptide 1	LOC_Os02g57810.1	--	cytochrome P450, putative, expressed
Seita.5G317900	blue	yes	3430.77	0.937883	AT1G59740.1	--	Major facilitator superfamily protein	LOC_Os01g54515.1	--	peptide transporter PTR2, putative, expressed
Seita.8G033000	blue	yes	3496.93	0.937838	AT2G27690.1	CYP94C1	cytochrome P450, family 94, subfamily C, polypeptide 1	LOC_Os11g05380.1	--	cytochrome P450, putative, expressed
Seita.7G186400	blue	yes	3453.61	0.93755	AT5G47230.1	ATERF-5,ATERF5,ERF5	ethylene responsive element binding factor 5	LOC_Os04g46250.1	--	AP2 domain containing protein, expressed
Seita.5G158600	blue	yes	3449.1	0.937385	AT1G15690.1	ATAVP3,AtVHP1;1,AVP-3,AVP1	Inorganic H pyrophosphatase family protein	LOC_Os01g23580.1	--	inorganic H+ pyrophosphatase, putative, expressed
Seita.2G253800	blue	yes	3502.28	0.937029	AT5G06839.2	bZIP65,TGA10	bZIP transcription factor family protein	LOC_Os09g31390.1	--	transcription factor, putative, expressed
Seita.3G005000	blue	yes	3504.12	0.937024	AT1G71695.1	--	Peroxidase superfamily protein	LOC_Os04g59160.1	--	peroxidase precursor, putative, expressed
Seita.5G459100	blue	yes	3633.05	0.936957	AT5G25180.1	CYP71B14	cytochrome P450, family 71, subfamily B, polypeptide 14	LOC_Os01g72740.1	--	cytochrome P450, putative, expressed
Seita.3G383300	blue	yes	3552.77	0.936864	AT5G10530.1	--	Concanavalin A-like lectin protein kinase family protein	LOC_Os12g41530.1	--	cysteine-rich receptor-like protein kinase 8 precursor, putative, expressed
Seita.9G222100	blue	yes	3640.17	0.936751	AT3G23250.1	ATMYB15,ATY19,MYB15	myb domain protein 15	LOC_Os10g33810.1	--	myb-related protein Myb4, putative, expressed
Seita.3G051800	blue	yes	3590.65	0.936633	AT1G48000.1	AtMYB112,MYB112	myb domain protein 112	LOC_Os05g04210.1	--	MYB family transcription factor, putative, expressed
Seita.4G134200	blue	yes	3482.59	0.9365	AT5G10770.1	--	Eukaryotic aspartyl protease family protein	LOC_Os06g20140.1	--	aspartic proteinase nepenthesin-1 precursor, putative, expressed
Seita.9G103800	blue	yes	3507.67	0.93639	--	--	--	LOC_Os03g52370.2	--	PIII4 - Proteinase inhibitor II family protein precursor, expressed
Seita.2G222800	blue	yes	3510.49	0.936358	AT1G55230.1	--	Family of unknown function (DUF716)	LOC_Os09g27260.1	--	plant viral response family protein, putative, expressed
Seita.8G081700	blue	yes	3398.99	0.936172	AT1G07160.1	--	Protein phosphatase 2C family protein	LOC_Os12g09640.1	--	protein phosphatase 2C, putative, expressed
Seita.7G150100	blue	yes	3479.42	0.935695	AT3G54420.1	ATCHITIV,ATEP3,CHIV,EP3	homolog of carrot EP3-3 chitinase	LOC_Os04g41680.1	--	CHIT3 - Chitinase family protein precursor, expressed
Seita.4G223000	blue	yes	3590.11	0.935662	AT3G18690.1	MKS1	MAP kinase substrate 1	LOC_Os06g40090.1	--	VQ domain containing protein, putative, expressed
Seita.5G250400	blue	yes	3429.23	0.9356	AT3G54700.1	PHT1;7	phosphate transporter 1;7	LOC_Os01g46860.1	--	inorganic phosphate transporter, putative, expressed
Seita.5G095500	blue	yes	3426.85	0.935552	AT1G67000.1	--	Protein kinase superfamily protein	LOC_Os01g04580.1	--	Ser/Thr protein kinase, putative, expressed
Seita.7G155300	blue	yes	3526.27	0.93535	AT3G48310.1	CYP71A22	cytochrome P450, family 71, subfamily A, polypeptide 22	LOC_Os08g01450.1	--	cytochrome P450, putative, expressed
Seita.4G018100	blue	yes	3568.06	0.934897	--	--	--	LOC_Os06g03810.1	--	expressed protein
Seita.2G293700	blue	yes	3544.51	0.934526	AT5G48930.1	HCT	hydroxycinnamoyl-CoA shikimate/quinate hydroxycinnamoyl transferase	LOC_Os09g37200.1	--	transferase family protein, putative, expressed
Seita.7G196000	blue	yes	3443.61	0.934487	AT5G67360.1	ARA12	Subtilase family protein	LOC_Os04g47160.1	--	OsSub44 - Putative Subtilisin homologue, expressed
Seita.5G426700	blue	yes	3439.23	0.934222	--	--	--	LOC_Os01g68740.1	--	keratin, type I cytoskeletal 9, putative, expressed
Seita.1G312800	blue	yes	3452.77	0.934108	--	--	--	LOC_Os02g50400.1	--	expressed protein
Seita.2G308000	blue	yes	3429.52	0.933439	AT1G30910.1	--	Molybdenum cofactor sulfurase family protein	LOC_Os09g38772.1	--	MOSC domain-containing protein, mitochondrial precursor, putative, expressed
Seita.8G072600	blue	yes	3432.38	0.933404	AT2G16050.1	--	Cysteine/Histidine-rich C1 domain family protein	LOC_Os08g31250.1	--	C1-like domain containing protein, expressed
Seita.5G458900	blue	yes	3630.22	0.933333	AT5G25140.1	CYP71B13	cytochrome P450, family 71, subfamily B, polypeptide 13	LOC_Os01g72740.1	--	cytochrome P450, putative, expressed
Seita.5G287400	blue	yes	3427.27	0.933313	AT2G37360.1	--	ABC-2 type transporter family protein	LOC_Os09g23640.1	--	ABC-2 type transporter domain containing protein, expressed
Seita.6G096300	blue	yes	3545.88	0.933229	AT5G45890.1	SAG12	senescence-associated gene 12	LOC_Os04g13090.1	--	vignain precursor, putative, expressed
Seita.7G145100	blue	yes	3540.59	0.933021	AT1G05805.1	--	basic helix-loop-helix (bHLH) DNA-binding superfamily protein	LOC_Os04g41229.1	--	helix-loop-helix DNA-binding domain containing protein, expressed
Seita.3G153100	blue	yes	3532.87	0.932811	--	--	--	LOC_Os05g48210.1	--	expressed protein
Seita.7G291700	blue	yes	3508.27	0.932714	--	--	--	LOC_Os12g06900.1	--	citrate-binding protein precursor, putative, expressed
Seita.5G411000	blue	yes	3570.9	0.932381	AT3G09410.1	--	Pectinacetylesterase family protein	LOC_Os01g66830.1	--	pectinacetylesterase domain containing protein, expressed
Seita.7G231500	blue	yes	3657.55	0.932337	AT1G32910.1	--	HXXXD-type acyl-transferase family protein	LOC_Os04g51980.1	--	transferase family domain containing protein, expressed
Seita.7G189600	blue	yes	3462.75	0.931922	AT5G47450.1	ATTIP2;3,DELTA-TIP3,TIP2;3	tonoplast intrinsic protein 2;3	LOC_Os02g44080.1	--	aquaporin protein, putative, expressed
Seita.2G098500	blue	yes	3475.31	0.931501	AT3G02875.1	ILR1	Peptidase M20/M25/M40 family protein	LOC_Os07g14590.1	--	hydrolase, putative, expressed
Seita.6G255200	blue	yes	3352.87	0.931327	AT5G49830.1	EXO84B	exocyst complex component 84B	LOC_Os08g45200.1	--	expressed protein
Seita.6G226400	blue	yes	3587.06	0.931276	--	--	--	--	--	--
Seita.9G210700	blue	yes	3503.27	0.930877	--	--	--	--	--	--
Seita.5G453400	blue	yes	3545.13	0.930806	AT3G09270.1	ATGSTU8,GSTU8	glutathione S-transferase TAU 8	LOC_Os01g72140.1	--	glutathione S-transferase, putative, expressed
Seita.3G015800	blue	yes	3534.28	0.930779	AT5G36970.1	NHL25	NDR1/HIN1-like 25	LOC_Os04g58090.1	--	harpin-induced protein 1 domain containing protein, expressed
Seita.4G235700	blue	yes	3405.92	0.930694	AT3G50800.1	--	--	LOC_Os06g37190.1	--	expressed protein
Seita.5G342200	blue	yes	3648.4	0.930688	AT5G54490.1	PBP1	pinoid-binding protein 1	LOC_Os01g57470.1	--	EF hand family protein, putative, expressed
Seita.9G211300	blue	yes	3414.8	0.930643	--	--	--	LOC_Os10g34770.1	--	RIPER4 - Ripening-related family protein precursor, putative, expressed
Seita.9G485000	blue	yes	3560.4	0.930612	AT5G10190.1	--	Major facilitator superfamily protein	LOC_Os08g31700.1	--	UNE2, putative, expressed
Seita.6G053700	blue	yes	3606.51	0.930429	AT2G35270.1	GIK	Predicted AT-hook DNA-binding family protein	LOC_Os08g06320.1	--	DNA binding protein, putative, expressed
Seita.4G135900	blue	yes	3426.34	0.930227	AT5G10770.1	--	Eukaryotic aspartyl protease family protein	LOC_Os06g20190.1	--	aspartic proteinase nepenthesin-2 precursor, putative, expressed
Seita.4G223300	blue	yes	3412.48	0.92956	AT5G16990.1	--	Zinc-binding dehydrogenase family protein	LOC_Os06g40070.1	--	NADP-dependent oxidoreductase, putative, expressed
Seita.5G002700	blue	yes	3421.85	0.929289	AT4G27410.2	ANAC072,RD26	NAC (No Apical Meristem) domain transcriptional regulator superfamily protein	LOC_Os07g37920.1	--	no apical meristem protein, putative, expressed
Seita.5G347300	blue	yes	3549	0.928721	--	--	--	--	--	--
Seita.1G284300	blue	yes	3385.86	0.928479	AT2G02040.1	ATPTR2,ATPTR2-B,NTR1,PTR2,PTR2-B	peptide transporter 2	LOC_Os04g50940.1	--	peptide transporter PTR2, putative, expressed
Seita.7G219700	blue	yes	3477.33	0.928253	AT5G16770.1	AtMYB9,MYB9	myb domain protein 9	LOC_Os04g50680.1	--	MYB family transcription factor, putative, expressed
Seita.3G197500	blue	yes	3388.73	0.928217	AT3G10660.1	ATCPK2,CPK2	calmodulin-domain protein kinase cdpk isoform 2	LOC_Os05g41090.1	--	CAMK_CAMK_like_CG18020d.1 - CAMK includes calcium/calmodulin depedent protein kinases, expressed
Seita.6G168000	blue	yes	3673.65	0.928214	AT5G57510.1	--	--	LOC_Os08g34800.1	--	expressed protein
Seita.3G168200	blue	yes	3452.73	0.927712	AT1G28290.1	AGP31	arabinogalactan protein 31	LOC_Os05g45460.1	--	POEI52 - Pollen Ole e I allergen and extensin family protein precursor, expressed
Seita.1G357500	blue	yes	3348.05	0.927668	AT1G16250.1	--	Galactose oxidase/kelch repeat superfamily protein	LOC_Os02g56160.1	--	kelch repeat protein, putative, expressed
Seita.2G054900	blue	yes	3469.88	0.927578	AT1G21270.1	WAK2	wall-associated kinase 2	LOC_Os10g06140.1	--	OsWAK105 - OsWAK receptor-like protein kinase, expressed
Seita.1G253500	blue	yes	3459.64	0.927395	AT4G10390.1	--	Protein kinase superfamily protein	LOC_Os02g43290.1	--	protein kinase domain containing protein, expressed
Seita.9G140700	blue	yes	3501.94	0.92726	--	--	--	LOC_Os03g47350.1	--	expressed protein
Seita.1G069600	blue	yes	3459.25	0.927011	AT1G54320.1	--	LEM3 (ligand-effect modulator 3) family protein / CDC50 family protein	LOC_Os02g07750.1	--	cell cycle control protein, putative, expressed
Seita.2G217200	blue	yes	3374.42	0.926663	--	--	--	LOC_Os09g26710.1	--	major ampullate spidroin 2, putative, expressed
Seita.9G358900	blue	yes	3358.34	0.926647	AT5G40010.1	AATP1	AAA-ATPase 1	LOC_Os03g58790.1	--	ATPase, putative, expressed
Seita.9G025400	blue	yes	3478.46	0.926586	AT2G47480.1	--	Protein of unknown function (DUF3511)	LOC_Os03g61590.1	--	expressed protein
Seita.8G118400	blue	yes	3413.91	0.926527	AT3G04720.1	HEL,PR-4,PR4	pathogenesis-related 4	LOC_Os11g37950.1	--	WIP3 - Wound-induced protein precursor, expressed
Seita.2G320600	blue	yes	3575.06	0.926426	AT3G12720.1	ATMYB67,ATY53,MYB67	myb domain protein 67	LOC_Os07g31470.1	--	MYB family transcription factor, putative, expressed
Seita.5G341300	blue	yes	3411.34	0.926394	--	--	--	LOC_Os01g57400.1	--	lysM domain containing protein, putative
Seita.9G103400	blue	yes	3573.8	0.926179	AT3G57450.1	--	--	LOC_Os03g52410.1	--	expressed protein
Seita.6G096200	blue	yes	3516.27	0.926073	AT5G45890.1	SAG12	senescence-associated gene 12	LOC_Os04g13090.1	--	vignain precursor, putative, expressed
Seita.3G121200	blue	yes	3371.57	0.925225	AT4G33050.3	EDA39	calmodulin-binding family protein	LOC_Os01g38980.1	--	calmodulin-binding protein, putative, expressed
Seita.5G028900	blue	yes	3596.26	0.925072	AT1G48000.1	AtMYB112,MYB112	myb domain protein 112	LOC_Os01g19330.1	--	MYB family transcription factor, putative, expressed
Seita.6G016700	blue	yes	3480.69	0.924884	AT1G68390.1	--	Core-2/I-branching beta-1,6-N-acetylglucosaminyltransferase family protein	LOC_Os02g22160.1	--	DNA binding protein, putative, expressed
Seita.1G325700	blue	yes	3582.08	0.924854	AT1G22360.1	AtUGT85A2,UGT85A2	UDP-glucosyl transferase 85A2	LOC_Os02g51930.1	--	cytokinin-O-glucosyltransferase 2, putative, expressed
Seita.5G380500	blue	yes	3423.29	0.924723	AT2G37770.2	--	NAD(P)-linked oxidoreductase superfamily protein	LOC_Os01g62870.1	--	oxidoreductase, aldo/keto reductase family protein, putative, expressed
Seita.8G122300	blue	yes	3636.45	0.924474	AT2G23520.1	--	Pyridoxal phosphate (PLP)-dependent transferases superfamily protein	LOC_Os11g29630.1	--	expressed protein
Seita.2G374000	blue	yes	3545.88	0.924415	AT3G49950.1	--	GRAS family transcription factor	LOC_Os07g40020.1	--	GRAS family transcription factor domain containing protein, expressed
Seita.9G427300	blue	yes	3361.71	0.924339	AT5G22540.1	--	Plant protein of unknown function (DUF247)	LOC_Os03g19700.1	--	plant protein of unknown function domain containing protein, expressed
Seita.7G287600	blue	yes	3436.99	0.924117	--	--	--	LOC_Os12g07310.1	--	citrate-binding protein precursor, putative, expressed
Seita.4G074900	blue	yes	3472.14	0.924033	AT3G59760.1	ATCS-C,OASC	O-acetylserine (thiol) lyase isoform C	LOC_Os06g05690.1	--	cysteine synthase, chloroplast/chromoplast precursor, putative, expressed
Seita.7G185300	blue	yes	3459.59	0.923753	AT5G47070.1	--	Protein kinase superfamily protein	LOC_Os02g43430.1	--	protein kinase domain containing protein, expressed
Seita.5G319600	blue	yes	3368.68	0.923474	AT3G24550.1	ATPERK1,PERK1	proline extensin-like receptor kinase 1	LOC_Os01g54700.1	--	retrotransposon protein, putative, unclassified, expressed
Seita.3G137500	blue	yes	3552.49	0.923464	AT2G26640.1	KCS11	3-ketoacyl-CoA synthase 11	LOC_Os05g49900.1	--	3-ketoacyl-CoA synthase, putative, expressed
Seita.1G164900	blue	yes	3393.34	0.923331	AT3G26300.1	CYP71B34	cytochrome P450, family 71, subfamily B, polypeptide 34	LOC_Os12g32850.1	--	cytochrome P450, putative, expressed
Seita.1G105300	blue	yes	3382.74	0.923301	AT2G38870.1	--	Serine protease inhibitor, potato inhibitor I-type family protein	LOC_Os02g03140.1	--	inhibitor I family protein, putative, expressed
Seita.9G418300	blue	yes	3361.55	0.923167	AT5G04930.1	ALA1	aminophospholipid ATPase 1	LOC_Os03g20949.1	--	phospholipid-transporting ATPase, putative, expressed
Seita.5G269100	blue	yes	3605.22	0.923099	AT2G20080.1	--	--	LOC_Os01g48530.1	--	expressed protein
Seita.8G110200	blue	yes	3547.2	0.922964	AT4G35160.1	--	O-methyltransferase family protein	LOC_Os05g43930.1	--	O-methyltransferase, putative, expressed
Seita.9G360600	blue	yes	3390.72	0.922808	AT2G36800.1	DOGT1,UGT73C5	don-glucosyltransferase 1	LOC_Os03g24430.1	--	cytokinin-O-glucosyltransferase 3, putative, expressed
Seita.6G183900	blue	yes	3396.62	0.922706	AT2G26560.1	PLA IIA,PLA2A,PLP2	phospholipase A 2A	LOC_Os08g37210.1	--	patatin, putative, expressed
Seita.9G060000	blue	yes	3407	0.922675	AT2G32300.1	UCC1	uclacyanin 1	LOC_Os03g57740.1	--	plastocyanin-like domain containing protein, putative, expressed
Seita.9G251200	blue	yes	3630.18	0.922642	AT3G14280.1	--	--	LOC_Os10g25150.1	--	expressed protein
Seita.8G147800	blue	yes	3425.6	0.922484	AT2G39518.1	--	Uncharacterised protein family (UPF0497)	LOC_Os11g34730.1	--	membrane associated DUF588 domain containing protein, putative, expressed
Seita.9G477900	blue	yes	3623.27	0.922369	AT5G19890.1	--	Peroxidase superfamily protein	LOC_Os03g13210.1	--	peroxidase precursor, putative, expressed
Seita.9G526900	blue	yes	3407.81	0.922285	AT3G60070.1	--	Major facilitator superfamily protein	LOC_Os03g07170.1	--	lactose permease-related, putative, expressed
Seita.9G474100	blue	yes	3532.13	0.922169	AT5G37490.1	--	ARM repeat superfamily protein	LOC_Os03g13740.1	--	immediate-early fungal elicitor protein CMPG1, putative, expressed
Seita.6G039000	blue	yes	3356.91	0.922164	AT5G39110.1	--	RmlC-like cupins superfamily protein	LOC_Os12g05860.1	--	Cupin domain containing protein, expressed
Seita.4G147500	blue	yes	3487.67	0.92198	AT5G38560.1	--	Protein kinase superfamily protein	LOC_Os06g29340.1	--	retrotransposon protein, putative, unclassified, expressed
Seita.2G387900	blue	yes	3498	0.92197	AT3G13840.1	--	GRAS family transcription factor	LOC_Os03g29480.1	--	nodulation-signaling pathway 1 protein, putative, expressed
Seita.5G170000	blue	yes	3469.28	0.921929	AT4G11290.1	--	Peroxidase superfamily protein	LOC_Os03g25320.1	--	peroxidase precursor, putative, expressed
Seita.7G038500	blue	yes	3485.6	0.921844	AT5G45890.1	SAG12	senescence-associated gene 12	LOC_Os04g13090.1	--	vignain precursor, putative, expressed
Seita.2G189400	blue	yes	3540.88	0.921772	AT5G10190.1	--	Major facilitator superfamily protein	LOC_Os09g20490.1	--	transporter, putative, expressed
Seita.8G233900	blue	yes	3378.51	0.921762	--	--	--	LOC_Os11g45320.1	--	expressed protein
Seita.4G078000	blue	yes	3371.9	0.921716	AT1G76680.1	ATOPR1,OPR1	12-oxophytodienoate reductase 1	LOC_Os06g11210.1	--	12-oxophytodienoate reductase, putative, expressed
Seita.9G230600	blue	yes	3357.48	0.921538	AT5G62740.1	ATHIR1,HIR1	SPFH/Band 7/PHB domain-containing membrane-associated protein family	LOC_Os10g32700.1	--	hypersensitive-induced response protein, putative, expressed
Seita.7G139300	blue	yes	3412.83	0.921319	AT2G15490.3	UGT73B4	UDP-glycosyltransferase 73B4	LOC_Os04g47770.1	--	cis-zeatin O-glucosyltransferase, putative, expressed
Seita.7G038000	blue	yes	3490.76	0.921163	AT1G05680.1	UGT74E2	Uridine diphosphate glycosyltransferase 74E2	LOC_Os04g12970.1	--	UDP-glucoronosyl/UDP-glucosyl transferase, putative, expressed
Seita.1G326900	blue	yes	3596.91	0.920844	AT1G35210.1	--	--	LOC_Os02g52170.1	--	expressed protein
Seita.5G430300	blue	yes	3511.59	0.920373	AT4G19970.1	--	--	LOC_Os01g69140.1	--	regulatory protein, putative, expressed
Seita.2G112200	blue	yes	3535.59	0.920318	AT2G31230.1	ATERF15,ERF15	ethylene-responsive element binding factor 15	LOC_Os05g37640.1	--	expressed protein
Seita.6G211100	blue	yes	3591.84	0.920307	AT4G31330.1	--	Protein of unknown function, DUF599	LOC_Os08g40940.1	--	expressed protein
Seita.5G366600	blue	yes	3485.51	0.920288	AT5G58490.1	--	NAD(P)-binding Rossmann-fold superfamily protein	LOC_Os01g61230.1	--	dihydroflavonol-4-reductase, putative, expressed
Seita.9G266500	blue	yes	3376.82	0.919962	--	--	--	LOC_Os10g28380.1	--	MTN26L3 - MtN26 family protein precursor, putative, expressed
Seita.5G301200	blue	yes	3372.74	0.919634	AT4G37780.1	ATMYB87,MYB87	myb domain protein 87	LOC_Os01g52410.1	--	myb-like DNA-binding domain containing protein, putative, expressed
Seita.3G407800	blue	yes	3459.13	0.919438	AT1G04760.1	ATVAMP726,VAMP726	vesicle-associated membrane protein 726	LOC_Os12g44250.1	--	vesicle-associated membrane protein, putative, expressed
Seita.4G096300	blue	yes	3640.48	0.919433	AT2G21940.4	ATSK1,SK1	shikimate kinase 1	LOC_Os02g51410.1	--	shikimate kinase, putative, expressed
Seita.9G410900	blue	yes	3447.04	0.919252	AT1G72310.1	ATL3	RING/U-box superfamily protein	LOC_Os05g29676.1	--	RING-H2 finger protein, putative, expressed
Seita.9G544400	blue	yes	3612.82	0.919016	AT5G60710.1	--	Zinc finger (C3HC4-type RING finger) family protein	LOC_Os08g03270.1	--	zinc finger family protein, putative, expressed
Seita.8G180500	blue	yes	3415.08	0.918798	AT5G24090.1	ATCHIA,CHIA	chitinase A	LOC_Os11g47560.1	--	glycosyl hydrolase, putative, expressed
Seita.9G469400	blue	yes	3334.69	0.918014	AT2G41240.1	BHLH100	basic helix-loop-helix protein 100	LOC_Os01g72370.1	--	helix-loop-helix DNA-binding domain containing protein, expressed
Seita.2G228400	blue	yes	3494.13	0.917699	AT5G35370.1	--	S-locus lectin protein kinase family protein	LOC_Os09g28180.1	--	D-mannose binding lectin family protein, expressed
Seita.5G070800	blue	yes	3373.6	0.917519	AT1G75280.1	--	NmrA-like negative transcriptional regulator family protein	LOC_Os01g01650.1	--	isoflavone reductase homolog IRL, putative, expressed
Seita.4G282700	blue	yes	3348.42	0.917315	AT3G17675.1	--	Cupredoxin superfamily protein	LOC_Os06g50420.1	--	plastocyanin-like domain containing protein, putative, expressed
Seita.6G046200	blue	yes	3489.95	0.917139	AT3G29670.1	--	HXXXD-type acyl-transferase family protein	LOC_Os08g07720.1	--	transferase family protein, putative, expressed
Seita.9G480900	blue	yes	3528.98	0.917002	AT4G37850.1	--	basic helix-loop-helix (bHLH) DNA-binding superfamily protein	LOC_Os03g12760.1	--	helix-loop-helix DNA-binding domain containing protein, expressed
Seita.4G092100	blue	yes	3486.09	0.916045	AT1G78090.1	ATTPPB,TPPB	trehalose-6-phosphate phosphatase	LOC_Os06g11840.1	--	trehalose phosphatase, putative, expressed
Seita.3G066200	blue	yes	3360.43	0.916031	AT2G37650.1	--	GRAS family transcription factor	LOC_Os03g48450.3	--	SCARECROW, putative, expressed
Seita.4G118400	blue	yes	3569.4	0.916019	AT2G02850.1	ARPN	plantacyanin	LOC_Os06g15600.1	--	plastocyanin-like domain containing protein, putative, expressed
Seita.9G357400	blue	yes	3342.63	0.915906	AT1G27730.1	STZ,ZAT10	salt tolerance zinc finger	LOC_Os03g32230.1	--	ZOS3-12 - C2H2 zinc finger protein, expressed
Seita.3G004900	blue	yes	3569.59	0.915878	AT4G16270.1	--	Peroxidase superfamily protein	LOC_Os04g59190.1	--	peroxidase precursor, putative, expressed
Seita.3G155600	blue	yes	3490.24	0.915809	AT5G57500.1	--	Galactosyltransferase family protein	LOC_Os05g47880.1	--	hypro1, putative, expressed
Seita.4G097000	blue	yes	3419.69	0.915771	AT5G39865.1	--	Glutaredoxin family protein	LOC_Os02g51370.1	--	glutaredoxin, putative, expressed
Seita.2G413200	blue	yes	3467.24	0.915762	AT2G26710.1	BAS1,CYP72B1,CYP734A1	Cytochrome P450 superfamily protein	LOC_Os07g45290.1	--	cytochrome P450 72A1, putative, expressed
Seita.J004500	blue	yes	3384.96	0.915175	AT2G37740.1	ATZFP10,ZFP10	zinc-finger protein 10	LOC_Os07g01180.1	--	ZOS7-01 - C2H2 zinc finger protein, expressed
Seita.2G189300	blue	yes	3433.97	0.914849	AT5G10190.1	--	Major facilitator superfamily protein	LOC_Os09g20490.1	--	transporter, putative, expressed
Seita.5G466100	blue	yes	3432.73	0.914749	AT3G19430.1	--	late embryogenesis abundant protein-related / LEA protein-related	LOC_Os01g73700.1	--	RCLEA2 - Root cap and Late embryogenesis related family protein precursor, putative, expressed
Seita.9G140200	blue	yes	3606.11	0.914735	AT3G50760.1	GATL2	galacturonosyltransferase-like 2	LOC_Os03g47530.1	--	glycosyl transferase 8 domain containing protein, putative, expressed
Seita.3G009100	blue	yes	3500.63	0.914558	AT5G22250.1	--	Polynucleotidyl transferase, ribonuclease H-like superfamily protein	LOC_Os04g58810.1	--	CAF1 family ribonuclease containing protein, putative, expressed
Seita.7G024800	blue	yes	3452.27	0.914464	AT4G37370.1	CYP81D8	cytochrome P450, family 81, subfamily D, polypeptide 8	LOC_Os04g18380.1	--	cytochrome P450, putative, expressed
Seita.7G073400	blue	yes	3338.98	0.914372	AT3G26280.1	CYP71B4	cytochrome P450, family 71, subfamily B, polypeptide 4	LOC_Os02g09220.1	--	cytochrome P450, putative, expressed
Seita.3G034900	blue	yes	3409.06	0.914309	AT1G68290.1	ENDO 2	endonuclease 2	LOC_Os04g55850.1	--	nuclease PA3, putative, expressed
Seita.9G083000	blue	yes	3358.75	0.914299	AT4G37320.1	CYP81D5	cytochrome P450, family 81, subfamily D, polypeptide 5	LOC_Os03g55240.1	--	cytochrome P450, putative, expressed
Seita.9G542000	blue	yes	3459.48	0.914207	AT5G12890.1	--	UDP-Glycosyltransferase superfamily protein	LOC_Os04g42690.1	--	UDP-glucoronosyl and UDP-glucosyl transferase domain containing protein, expressed
Seita.2G090100	blue	yes	3443.53	0.914025	AT5G01750.2	--	Protein of unknown function (DUF567)	LOC_Os07g12730.1	--	DUF567 domain containing protein, putative, expressed
Seita.6G165400	blue	yes	3409.5	0.914019	AT1G73880.1	UGT89B1	UDP-glucosyl transferase 89B1	LOC_Os06g17260.1	--	UDP-glucoronosyl and UDP-glucosyl transferase domain containing protein, expressed
Seita.9G483300	blue	yes	3556.65	0.913916	AT2G33580.1	--	Protein kinase superfamily protein	LOC_Os03g13080.1	--	LYK, putative, expressed
Seita.8G068800	blue	yes	3373.05	0.913821	AT5G25140.1	CYP71B13	cytochrome P450, family 71, subfamily B, polypeptide 13	LOC_Os10g30390.1	--	cytochrome P450, putative, expressed
Seita.9G290900	blue	yes	3572.97	0.913753	AT2G14610.1	ATPR1,PR 1,PR1	pathogenesis-related gene 1	LOC_Os10g11500.1	--	SCP-like extracellular protein, expressed
Seita.1G103600	blue	yes	3663.21	0.913634	AT4G12080.1	AHL1,ATAHL1	AT-hook motif nuclear-localized protein 1	LOC_Os02g03270.1	--	AT hook motif domain containing protein, expressed
Seita.2G356900	blue	yes	3345.6	0.913403	--	--	--	--	--	--
Seita.3G189800	blue	yes	3547.69	0.913189	AT2G36800.1	DOGT1,UGT73C5	don-glucosyltransferase 1	LOC_Os05g42020.1	--	UDP-glucoronosyl and UDP-glucosyl transferase domain containing protein, expressed
Seita.7G239400	blue	yes	3472.76	0.913166	--	--	--	--	--	--
Seita.4G105900	blue	yes	3281.47	0.913089	AT1G70170.1	MMP	matrix metalloproteinase	LOC_Os06g13180.1	--	metalloendoproteinase 1 precursor, putative, expressed
Seita.8G099300	blue	yes	3349.09	0.913009	--	--	--	--	--	--
Seita.6G162100	blue	yes	3409.37	0.912699	AT1G21270.1	WAK2	wall-associated kinase 2	LOC_Os10g07556.1	--	wall-associated receptor kinase-like 22 precursor, putative, expressed
Seita.3G339800	blue	yes	3646.49	0.912561	AT2G45550.1	CYP76C4	cytochrome P450, family 76, subfamily C, polypeptide 4	LOC_Os08g39730.1	--	cytochrome P450, putative, expressed
Seita.4G121900	blue	yes	3421.55	0.912299	AT4G15480.1	UGT84A1	UDP-Glycosyltransferase superfamily protein	LOC_Os02g09510.1	--	limonoid UDP-glucosyltransferase, putative, expressed
Seita.2G369900	blue	yes	3467.47	0.911956	AT5G48130.1	--	Phototropic-responsive NPH3 family protein	LOC_Os07g39530.1	--	BTBN16 - Bric-a-Brac, Tramtrack, Broad Complex BTB domain with non-phototropic hypocotyl 3 NPH3 domain, expressed
Seita.4G216300	blue	yes	3345.36	0.911806	AT5G06900.1	CYP93D1	cytochrome P450, family 93, subfamily D, polypeptide 1	LOC_Os06g41070.1	--	cytochrome P450, putative, expressed
Seita.7G082700	blue	yes	3463	0.911788	AT4G13420.1	ATHAK5,HAK5	high affinity K+ transporter 5	LOC_Os04g32920.3	--	potassium transporter, putative, expressed
Seita.5G043700	blue	yes	3411.88	0.911517	AT1G27600.1	I9H,IRX9-L	Nucleotide-diphospho-sugar transferases superfamily protein	LOC_Os10g13810.1	--	glycosyltransferase family 43 protein, putative, expressed
Seita.6G100700	blue	yes	3423.04	0.911177	AT5G45890.1	SAG12	senescence-associated gene 12	LOC_Os04g13090.1	--	vignain precursor, putative, expressed
Seita.6G095900	blue	yes	3463.16	0.911127	AT5G45890.1	SAG12	senescence-associated gene 12	LOC_Os04g13090.1	--	vignain precursor, putative, expressed
Seita.2G269800	blue	yes	3327.59	0.911126	AT5G47920.1	--	--	LOC_Os09g33650.1	--	expressed protein
Seita.2G236200	blue	yes	3379.91	0.911088	AT2G22475.1	GEM	GRAM domain family protein	LOC_Os09g29120.1	--	GRAM domain containing protein, expressed
Seita.4G033700	blue	yes	3335.55	0.911067	AT3G54320.1	ASML1,ATWRI1,WRI,WRI1	Integrase-type DNA-binding superfamily protein	LOC_Os06g05340.1	--	AP2 domain containing protein, expressed
Seita.4G135800	blue	yes	3332.79	0.911005	AT5G10770.1	--	Eukaryotic aspartyl protease family protein	LOC_Os06g20190.1	--	aspartic proteinase nepenthesin-2 precursor, putative, expressed
Seita.9G294800	blue	yes	3346.37	0.910996	AT4G25570.1	ACYB-2	Cytochrome b561/ferric reductase transmembrane protein family	LOC_Os10g02920.1	--	cytochrome b561, putative, expressed
Seita.4G264000	blue	yes	3358.23	0.910985	AT2G38870.1	--	Serine protease inhibitor, potato inhibitor I-type family protein	LOC_Os02g03170.1	--	inhibitor I family protein, putative, expressed
Seita.2G234500	blue	yes	3335.18	0.91094	AT3G63470.1	scpl40	serine carboxypeptidase-like 40	LOC_Os09g28840.1	--	OsSCP43 - Putative Serine Carboxypeptidase homologue, expressed
Seita.2G405200	blue	yes	3386.48	0.910839	AT4G23690.1	--	Disease resistance-responsive (dirigent-like protein) family protein	LOC_Os07g44250.1	--	dirigent, putative, expressed
Seita.4G284300	blue	yes	3335.1	0.910784	AT1G71691.2	--	GDSL-like Lipase/Acylhydrolase superfamily protein	LOC_Os06g50940.1	--	GDSL-like lipase/acylhydrolase, putative, expressed
Seita.9G418900	blue	yes	3480.21	0.910745	AT3G03660.1	WOX11	WUSCHEL related homeobox 11	LOC_Os03g20910.2	--	homeobox domain containing protein, expressed
Seita.5G190800	blue	yes	3423.66	0.910733	AT1G04350.1	--	2-oxoglutarate (2OG) and Fe(II)-dependent oxygenase superfamily protein	LOC_Os01g35230.1	--	1-aminocyclopropane-1-carboxylate oxidase homolog 1, putative, expressed
Seita.3G275500	blue	yes	3389.07	0.910712	AT5G49350.1	--	Glycine-rich protein family	LOC_Os05g28780.1	--	GCRP10 - Glycine and cysteine rich family protein precursor, expressed
Seita.1G305400	blue	yes	3385.58	0.910701	AT5G15890.1	TBL21	TRICHOME BIREFRINGENCE-LIKE 21	LOC_Os02g49650.1	--	leaf senescence related protein, putative, expressed
Seita.9G506900	blue	yes	3389.18	0.910687	AT5G48750.1	--	Cytochrome b561/ferric reductase transmembrane with DOMON related domain	LOC_Os03g09880.1	--	AIR12, putative, expressed
Seita.4G012000	blue	yes	3328.66	0.910489	--	--	--	LOC_Os06g02520.1	--	interacting protein of DMI3, putative, expressed
Seita.1G315500	blue	yes	3650.86	0.910356	AT1G19020.1	--	--	LOC_Os02g50710.1	--	expressed protein
Seita.4G139200	blue	yes	3588.99	0.910227	--	--	--	--	--	--
Seita.9G235200	blue	yes	3542.44	0.910081	--	--	--	LOC_Os10g31540.1	--	glycine-rich cell wall structural protein 2 precursor, putative, expressed
Seita.3G270000	blue	yes	3518.26	0.910038	AT1G02850.2	BGLU11	beta glucosidase 11	LOC_Os05g30350.1	--	Os5bglu22 - beta-glucosidase homologue, similar to G. max isohydroxyurate hydrolase, expressed
Seita.3G152300	blue	yes	3412.55	0.909967	AT5G05350.1	--	PLAC8 family protein	LOC_Os05g39730.1	--	SAG20, putative, expressed
Seita.1G338100	blue	yes	3630.44	0.909826	AT1G17590.1	NF-YA8	nuclear factor Y, subunit A8	LOC_Os02g53620.1	--	nuclear transcription factor Y subunit, putative, expressed
Seita.1G105400	blue	yes	3344.75	0.909573	--	--	--	LOC_Os02g03140.1	--	inhibitor I family protein, putative, expressed
Seita.8G154000	blue	yes	3549.91	0.909556	AT1G01420.1	UGT72B3	UDP-glucosyl transferase 72B3	LOC_Os11g38650.1	--	UDP-glucoronosyl/UDP-glucosyl transferase, putative, expressed
Seita.4G212500	blue	yes	3432.2	0.909443	AT2G33590.1	--	NAD(P)-binding Rossmann-fold superfamily protein	LOC_Os06g41840.1	--	reductase, putative, expressed
Seita.3G234900	blue	yes	3324.99	0.90934	AT5G06730.1	--	Peroxidase superfamily protein	LOC_Os03g13180.1	--	peroxidase precursor, putative, expressed
Seita.8G090500	blue	yes	3456.25	0.90885	AT5G16080.1	AtCXE17,CXE17	carboxyesterase 17	LOC_Os11g04350.1	--	cell death associated protein, putative, expressed
Seita.6G037500	blue	yes	3519.29	0.908701	AT5G39110.1	--	RmlC-like cupins superfamily protein	LOC_Os08g09010.1	--	Cupin domain containing protein, expressed
Seita.8G216400	blue	yes	3335.59	0.908678	AT5G06060.1	--	NAD(P)-binding Rossmann-fold superfamily protein	LOC_Os11g43200.1	--	tropinone reductase 2, putative, expressed
Seita.3G201500	blue	yes	3377.07	0.90803	AT5G24910.1	CYP714A1	cytochrome P450, family 714, subfamily A, polypeptide 1	LOC_Os05g40384.1	--	cytochrome P450, putative, expressed
Seita.5G128400	blue	yes	3361.94	0.907977	AT5G15240.1	--	Transmembrane amino acid transporter family protein	LOC_Os04g38680.1	--	transmembrane amino acid transporter protein, putative, expressed
Seita.3G354300	blue	yes	3394.82	0.907924	--	--	--	--	--	--
Seita.6G097500	blue	yes	3508.53	0.907367	AT3G26330.1	CYP71B37	cytochrome P450, family 71, subfamily B, polypeptide 37	LOC_Os08g01510.1	--	cytochrome P450, putative, expressed
Seita.8G105600	blue	yes	3483.98	0.907295	AT5G13930.1	ATCHS,CHS,TT4	Chalcone and stilbene synthase family protein	LOC_Os11g35930.1	--	chalcone synthase, putative, expressed
Seita.1G267000	blue	yes	3331.07	0.907129	AT4G28780.1	--	GDSL-like Lipase/Acylhydrolase superfamily protein	LOC_Os02g44850.1	--	GDSL-like lipase/acylhydrolase, putative, expressed
Seita.3G323400	blue	yes	3425.38	0.907065	AT2G28120.1	--	Major facilitator superfamily protein	LOC_Os12g29950.1	--	nodulin, putative, expressed
Seita.3G104900	blue	yes	3327.77	0.90706	AT3G24420.1	--	alpha/beta-Hydrolases superfamily protein	LOC_Os05g08740.1	--	hydrolase, alpha/beta fold family domain containing protein, expressed
Seita.4G077900	blue	yes	3315.65	0.907051	AT1G76680.1	ATOPR1,OPR1	12-oxophytodienoate reductase 1	LOC_Os06g11290.1	--	12-oxophytodienoate reductase, putative, expressed
Seita.1G131500	blue	yes	3529.06	0.90703	AT5G52450.1	--	MATE efflux family protein	LOC_Os10g11354.1	--	MATE efflux family protein, putative, expressed
Seita.6G096000	blue	yes	3443.6	0.906726	AT5G45890.1	SAG12	senescence-associated gene 12	LOC_Os04g13090.1	--	vignain precursor, putative, expressed
Seita.7G094600	blue	yes	3297.38	0.90668	AT5G54200.1	--	Transducin/WD40 repeat-like superfamily protein	LOC_Os04g34080.1	--	WD-40 repeat family protein, putative, expressed
Seita.9G511800	blue	yes	3629.46	0.906567	AT1G72200.1	--	RING/U-box superfamily protein	LOC_Os03g08920.1	--	Zinc finger, C3HC4 type domain containing protein, expressed
Seita.7G275800	blue	yes	3212.68	0.906488	AT2G40180.1	ATHPP2C5,PP2C5	phosphatase 2C5	LOC_Os12g09640.1	--	protein phosphatase 2C, putative, expressed
Seita.6G074300	blue	yes	3615.14	0.906253	AT2G38110.1	ATGPAT6,GPAT6	glycerol-3-phosphate acyltransferase 6	LOC_Os08g03700.1	--	glycerol-3-phosphate acyltransferase, putative, expressed
Seita.1G157600	blue	yes	3555.7	0.905963	AT2G30490.1	ATC4H,C4H,CYP73A5,REF3	cinnamate-4-hydroxylase	LOC_Os02g26810.1	--	cytochrome P450, putative, expressed
Seita.3G408600	blue	yes	3443.18	0.905314	AT5G35370.1	--	S-locus lectin protein kinase family protein	LOC_Os12g44320.1	--	carbohydrate binding protein, putative, expressed
Seita.9G098300	blue	yes	3313.8	0.905014	AT3G23100.1	XRCC4	homolog of human DNA ligase iv-binding protein XRCC4	LOC_Os03g53000.1	--	XRCC4, putative, expressed
Seita.6G179900	blue	yes	3515.24	0.905006	AT1G08080.1	ACA7,ATACA7	alpha carbonic anhydrase 7	LOC_Os08g36630.1	--	bifunctional monodehydroascorbate reductase and carbonic anhydrasenectarin-3 precursor, putative, expressed
Seita.8G030500	blue	yes	3373.76	0.904768	AT4G12080.1	AHL1,ATAHL1	AT-hook motif nuclear-localized protein 1	LOC_Os11g05160.1	--	DNA binding protein, putative, expressed
Seita.1G310900	blue	yes	3540.24	0.904762	AT1G70680.1	--	Caleosin-related family protein	LOC_Os02g50140.1	--	caleosin related protein, putative, expressed
Seita.9G239900	blue	yes	3470.21	0.904395	AT2G37710.1	RLK	receptor lectin kinase	LOC_Os10g30540.1	--	lectin-like receptor kinase, putative, expressed
Seita.2G300000	blue	yes	3318.52	0.904354	AT4G21380.1	ARK3,RK3	receptor kinase 3	LOC_Os09g37840.1	--	carbohydrate binding protein, putative, expressed
Seita.3G080700	blue	yes	3309.21	0.904352	AT5G43540.1	--	C2H2 and C2HC zinc fingers superfamily protein	LOC_Os05g14130.1	--	ZOS5-05 - C2H2 zinc finger protein, expressed
Seita.5G358900	blue	yes	3447.68	0.904341	AT5G08790.1	anac081,ATAF2	NAC (No Apical Meristem) domain transcriptional regulator superfamily protein	LOC_Os01g60020.1	--	NAC domain transcription factor, putative, expressed
Seita.6G153100	blue	yes	3306.02	0.904008	AT1G48480.1	RKL1	receptor-like kinase 1	LOC_Os08g33090.1	--	inactive receptor kinase At2g26730 precursor, putative, expressed
Seita.3G159900	blue	yes	3329.55	0.903995	AT4G18050.1	PGP9	P-glycoprotein 9	LOC_Os05g47500.1	--	MDR-like ABC transporter, putative, expressed
Seita.1G168100	blue	yes	3499.77	0.903922	AT2G25280.1	--	--	LOC_Os08g20270.2	--	MEMO1, putative, expressed
Seita.6G039100	blue	yes	3296.63	0.903502	AT5G39110.1	--	RmlC-like cupins superfamily protein	LOC_Os12g05860.1	--	Cupin domain containing protein, expressed
Seita.3G176800	blue	yes	3312.43	0.903398	--	--	--	--	--	--
Seita.7G240100	blue	yes	3392.53	0.903355	AT3G12977.1	--	NAC (No Apical Meristem) domain transcriptional regulator superfamily protein	LOC_Os06g46270.1	--	no apical meristem protein, putative, expressed
Seita.2G219400	blue	yes	3522.9	0.903248	AT5G07990.1	CYP75B1,D501,TT7	Cytochrome P450 superfamily protein	LOC_Os09g26960.1	--	cytochrome P450, putative, expressed
Seita.1G031400	blue	yes	3537.27	0.903241	AT4G22030.1	--	F-box family protein with a domain of unknown function (DUF295)	LOC_Os02g13220.1	--	F-box family protein, putative, expressed
Seita.2G397500	blue	yes	3347.37	0.902972	AT5G64080.2	--	Bifunctional inhibitor/lipid-transfer protein/seed storage 2S albumin superfamily protein	LOC_Os07g43290.1	--	LTPL56 - Protease inhibitor/seed storage/LTP family protein precursor, expressed
Seita.7G215600	blue	yes	3427	0.902931	AT3G51550.1	FER	Malectin/receptor-like protein kinase family protein	LOC_Os04g49690.1	--	FERONIA receptor-like kinase, putative, expressed
Seita.9G347000	blue	yes	3315.91	0.902745	AT1G10360.1	ATGSTU18,GST29,GSTU18	glutathione S-transferase TAU 18	LOC_Os10g38489.1	--	glutathione S-transferase GSTU6, putative, expressed
Seita.4G216200	blue	yes	3494.32	0.902683	--	--	--	--	--	--
Seita.1G318900	blue	yes	3343.49	0.902512	AT1G26870.1	ANAC009,FEZ	NAC (No Apical Meristem) domain transcriptional regulator superfamily protein	LOC_Os08g33910.1	--	no apical meristem protein, putative, expressed
Seita.4G142000	blue	yes	3492.17	0.902508	--	--	--	LOC_Os06g22150.1	--	expressed protein
Seita.3G179100	blue	yes	3507.95	0.902113	AT4G35160.1	--	O-methyltransferase family protein	LOC_Os05g43940.1	--	O-methyltransferase, putative, expressed
Seita.3G006300	blue	yes	3401.6	0.902053	AT2G17700.1	--	ACT-like protein tyrosine kinase family protein	LOC_Os04g59000.1	--	protein kinase family protein, putative, expressed
Seita.2G133900	blue	yes	3311	0.901854	AT1G02335.1	GL22	germin-like protein subfamily 2 member 2 precursor	LOC_Os09g39510.1	--	Cupin domain containing protein, expressed
Seita.5G270400	blue	yes	3322.1	0.901705	AT3G05920.1	--	Heavy metal transport/detoxification superfamily protein	LOC_Os01g48710.1	--	heavy metal-associated domain containing protein, expressed
Seita.7G285000	blue	yes	3444.8	0.9017	AT1G58170.1	--	Disease resistance-responsive (dirigent-like protein) family protein	LOC_Os12g07580.1	--	dirigent, putative, expressed
Seita.2G238400	blue	yes	3280.21	0.901663	AT3G05200.1	ATL6	RING/U-box superfamily protein	LOC_Os09g29310.1	--	zinc finger, C3HC4 type domain containing protein, expressed
Seita.7G305900	blue	yes	3411.57	0.901526	AT1G19715.3	--	Mannose-binding lectin superfamily protein	LOC_Os04g03360.1	--	jacalin-like lectin domain containing protein, expressed
Seita.3G266200	blue	yes	3302.65	0.901432	--	--	--	LOC_Os01g71040.1	--	expressed protein
Seita.1G059300	blue	yes	3300.36	0.901148	AT5G07990.1	CYP75B1,D501,TT7	Cytochrome P450 superfamily protein	LOC_Os02g09200.1	--	cytochrome P450 71D10, putative, expressed
Seita.9G361900	blue	yes	3457.43	0.900967	AT4G00340.1	RLK4	receptor-like protein kinase 4	LOC_Os03g30890.1	--	S-locus-like receptor protein kinase, putative, expressed
Seita.6G136400	blue	yes	3322.45	0.900728	AT3G47780.1	ATATH6,ATH6	ABC2 homolog 6	LOC_Os08g30770.1	--	ABC transporter, ATP-binding protein, putative, expressed
Seita.1G264400	blue	yes	3281.65	0.900672	AT2G45910.1	--	U-box domain-containing protein kinase family protein	LOC_Os10g40100.1	--	protein kinase, putative, expressed
Seita.5G442900	blue	yes	3321.1	0.900654	AT2G23610.1	ATMES3,MES3	methyl esterase 3	LOC_Os05g30760.1	--	esterase, putative, expressed
Seita.5G031600	blue	yes	3306.39	0.900282	AT3G62160.1	--	HXXXD-type acyl-transferase family protein	LOC_Os01g18744.1	--	transferase family protein, putative, expressed
Seita.8G211000	blue	yes	3376.68	0.900167	AT3G09220.1	LAC7	laccase 7	LOC_Os10g20610.1	--	laccase-15 precursor, putative, expressed
Seita.3G182500	blue	yes	3504.01	0.899889	AT1G10140.1	--	Uncharacterised conserved protein UCP031279	LOC_Os07g03170.1	--	expressed protein
Seita.8G211100	blue	yes	3531.4	0.899833	AT3G09220.1	LAC7	laccase 7	LOC_Os10g20610.1	--	laccase-15 precursor, putative, expressed
Seita.7G038400	blue	yes	3387.81	0.899631	AT5G45890.1	SAG12	senescence-associated gene 12	LOC_Os04g13090.1	--	vignain precursor, putative, expressed
Seita.1G031500	blue	yes	3240.15	0.899346	AT4G04480.1	--	--	LOC_Os02g13220.1	--	F-box family protein, putative, expressed
Seita.2G212400	blue	yes	3412.8	0.899334	AT2G29110.1	ATGLR2.8,GLR2.8	glutamate receptor 2.8	LOC_Os09g25980.1	--	glutamate receptor 2.6 precursor, putative, expressed
Seita.2G144400	blue	yes	3277.99	0.899288	AT1G79460.1	ATKS,ATKS1,GA2,KS,KS1	Terpenoid cyclases/Protein prenyltransferases superfamily protein	LOC_Os11g28530.1	--	terpene synthase, putative, expressed
Seita.5G396800	blue	yes	3514.32	0.899166	AT1G22540.1	--	Major facilitator superfamily protein	LOC_Os01g65190.1	--	POT domain containing peptide transporter, putative, expressed
Seita.9G430600	blue	yes	3282.77	0.899113	AT3G62720.2	ATXT1,XT1,XXT1	xylosyltransferase 1	LOC_Os03g19330.1	--	glycosyltransferase, putative, expressed
Seita.8G045600	blue	yes	3308.47	0.898642	--	--	--	LOC_Os12g07310.1	--	citrate-binding protein precursor, putative, expressed
Seita.5G463100	blue	yes	3393.44	0.898468	AT1G18590.1	ATSOT17,ATST5C,SOT17	sulfotransferase 17	LOC_Os08g40380.1	--	sulfotransferase domain containing protein, expressed
Seita.5G007900	blue	yes	3471.45	0.898467	AT2G20080.1	--	--	LOC_Os01g13040.1	--	expressed protein
Seita.4G245400	blue	yes	3421.56	0.898391	AT5G06710.1	HAT14	homeobox from Arabidopsis thaliana	LOC_Os06g48290.1	--	homeobox associated leucine zipper, putative, expressed
Seita.9G105100	blue	yes	3364.23	0.898281	--	--	--	--	--	--
Seita.3G207000	blue	yes	3466.59	0.898205	AT2G30230.1	--	--	LOC_Os05g39710.1	--	expressed protein
Seita.2G192400	blue	yes	3200.63	0.898153	AT2G26730.1	--	Leucine-rich repeat protein kinase family protein	LOC_Os09g20970.1	--	receptor kinase, putative, expressed
Seita.1G016400	blue	yes	3538.34	0.898029	AT5G17540.1	--	HXXXD-type acyl-transferase family protein	LOC_Os10g01660.1	--	transferase family protein, putative, expressed
Seita.7G124900	blue	yes	3511.65	0.897941	AT5G07680.1	ANAC079,ANAC080,ATNAC4,NAC080	NAC domain containing protein 80	LOC_Os04g38720.1	--	no apical meristem protein, putative, expressed
Seita.9G210500	blue	yes	3437.47	0.897845	--	--	--	LOC_Os02g42450.1	--	RIPER1 - Ripening-related family protein precursor, expressed
Seita.4G026200	blue	yes	3548.86	0.897818	AT2G45430.1	AHL22	AT-hook motif nuclear-localized protein 22	LOC_Os06g04540.1	--	DNA binding protein, putative, expressed
Seita.2G174500	blue	yes	3301.35	0.897698	AT3G63520.1	ATCCD1,ATNCED1,CCD1,NCED1	carotenoid cleavage dioxygenase 1	LOC_Os09g15240.1	--	carotenoid cleavage dioxygenase, putative, expressed
Seita.9G440500	blue	yes	3483.77	0.897636	AT2G30020.1	--	Protein phosphatase 2C family protein	LOC_Os03g18150.1	--	protein phosphatase 2C, putative, expressed
Seita.8G123500	blue	yes	3329.2	0.897624	AT3G26330.1	CYP71B37	cytochrome P450, family 71, subfamily B, polypeptide 37	LOC_Os12g44290.1	--	cytochrome P450, putative, expressed
Seita.2G340500	blue	yes	3532.7	0.897459	AT4G23310.1	CRK23	cysteine-rich RLK (RECEPTOR-like protein kinase) 23	LOC_Os07g35004.1	--	TKL_IRAK_DUF26-la.4 - DUF26 kinases have homology to DUF26 containing loci, expressed
Seita.1G196600	blue	yes	3427.82	0.897429	AT1G53050.1	--	Protein kinase superfamily protein	LOC_Os02g35300.1	--	transposon protein, putative, unclassified, expressed
Seita.5G341500	blue	yes	3300.55	0.897235	--	--	--	LOC_Os01g57400.1	--	lysM domain containing protein, putative
Seita.3G340000	blue	yes	3452.63	0.896784	--	--	--	--	--	--
Seita.5G189800	blue	yes	3460.58	0.896531	AT4G15420.1	--	Ubiquitin fusion degradation UFD1 family protein	LOC_Os01g35040.1	--	ZOS1-09 - C2H2 zinc finger protein, expressed
Seita.1G245200	blue	yes	3303.68	0.896468	AT3G22250.1	--	UDP-Glycosyltransferase superfamily protein	LOC_Os04g44354.1	--	UDP-glucoronosyl and UDP-glucosyl transferase domain containing protein, expressed
Seita.1G339700	blue	yes	3521.7	0.896458	AT3G43860.1	AtGH9A4,GH9A4	glycosyl hydrolase 9A4	LOC_Os02g53820.2	--	endoglucanase, putative, expressed
Seita.2G075000	blue	yes	3563.34	0.896427	AT3G46530.1	RPP13	NB-ARC domain-containing disease resistance protein	LOC_Os06g06850.1	--	resistance protein LR10, putative, expressed
Seita.9G061300	blue	yes	3416.8	0.896044	AT3G43600.1	AAO2,AO3,AOgamma,atAO-2,AtAO3	aldehyde oxidase 2	LOC_Os03g57690.1	--	aldehyde oxidase, putative, expressed
Seita.1G095000	blue	yes	3378.19	0.895684	AT3G18180.1	--	Glycosyltransferase family 61 protein	LOC_Os02g04250.1	--	glycosyltransferase, putative, expressed
Seita.4G189600	blue	yes	3367.36	0.895158	AT5G57090.1	AGR,AGR1,ATPIN2,EIR1,PIN2,WAV6	Auxin efflux carrier family protein	LOC_Os06g44970.1	--	auxin efflux carrier component, putative, expressed
Seita.1G105800	blue	yes	3278.33	0.895155	AT2G38870.1	--	Serine protease inhibitor, potato inhibitor I-type family protein	LOC_Os08g34258.1	--	inhibitor I family protein, putative, expressed
Seita.6G094500	blue	yes	3400.15	0.895104	AT3G26330.1	CYP71B37	cytochrome P450, family 71, subfamily B, polypeptide 37	LOC_Os01g27890.1	--	cytochrome P450, putative, expressed
Seita.9G430300	blue	yes	3366.86	0.894906	AT3G62420.1	ATBZIP53,BZIP53	basic region/leucine zipper motif 53	LOC_Os03g19375.1	--	expressed protein
Seita.8G232300	blue	yes	3312.1	0.894865	--	--	--	--	--	--
Seita.3G282200	blue	yes	3421.76	0.894673	--	--	--	LOC_Os12g08310.1	--	expressed protein
Seita.9G160500	blue	yes	3325.84	0.894626	AT1G21270.1	WAK2	wall-associated kinase 2	LOC_Os09g38840.1	--	OsWAK90 - OsWAK receptor-like protein kinase, expressed
Seita.5G391200	blue	yes	3229.37	0.894489	AT5G22380.1	anac090,NAC090	NAC domain containing protein 90	LOC_Os01g64310.1	--	no apical meristem protein, putative, expressed
Seita.7G036700	blue	yes	3447.89	0.894445	AT5G13930.1	ATCHS,CHS,TT4	Chalcone and stilbene synthase family protein	LOC_Os11g32650.1	--	chalcone synthase, putative, expressed
Seita.7G265300	blue	yes	3361.54	0.89442	AT5G05340.1	--	Peroxidase superfamily protein	LOC_Os04g55740.1	--	peroxidase precursor, putative, expressed
Seita.9G209800	blue	yes	3322.56	0.894166	--	--	--	LOC_Os10g34902.1	--	RIPER9 - Ripening-related family protein precursor, putative, expressed
Seita.9G377100	blue	yes	3239.19	0.89414	AT2G27920.1	SCPL51	serine carboxypeptidase-like 51	LOC_Os03g27590.1	--	OsSCP18 - Putative Serine Carboxypeptidase homologue, expressed
Seita.9G059900	blue	yes	3285.5	0.89398	AT2G32300.1	UCC1	uclacyanin 1	LOC_Os03g57740.1	--	plastocyanin-like domain containing protein, putative, expressed
Seita.6G159900	blue	yes	3326.93	0.893784	AT1G26870.1	ANAC009,FEZ	NAC (No Apical Meristem) domain transcriptional regulator superfamily protein	LOC_Os08g33910.1	--	no apical meristem protein, putative, expressed
Seita.9G061000	blue	yes	3279.85	0.893723	AT5G26330.1	--	Cupredoxin superfamily protein	LOC_Os03g57730.1	--	uclacyanin-2 precursor, putative, expressed
Seita.9G205700	blue	yes	3375.36	0.893711	AT3G51000.1	--	alpha/beta-Hydrolases superfamily protein	LOC_Os10g35520.1	--	hydrolase, alpha/beta fold family domain containing protein, expressed
Seita.5G387000	blue	yes	3570.67	0.893601	AT2G40000.1	ATHSPRO2,HSPRO2	ortholog of sugar beet HS1 PRO-1 2	LOC_Os01g63690.1	--	hs1, putative, expressed
Seita.2G214000	blue	yes	3513.86	0.893509	AT5G57500.1	--	Galactosyltransferase family protein	LOC_Os09g26300.1	--	hypro1, putative, expressed
Seita.2G375300	blue	yes	3461.92	0.893493	AT2G14960.1	GH3.1	Auxin-responsive GH3 family protein	LOC_Os07g40290.1	--	OsGH3.8 - Probable indole-3-acetic acid-amido synthetase, expressed
Seita.1G157400	blue	yes	3393.29	0.893422	AT5G16760.1	--	Inositol 1,3,4-trisphosphate 5/6-kinase family protein	LOC_Os02g26720.1	--	Inositol 1, 3, 4-trisphosphate 5/6-kinase, putative, expressed
Seita.7G149000	blue	yes	3474.7	0.893215	AT2G43320.2	--	S-adenosyl-L-methionine-dependent methyltransferases superfamily protein	LOC_Os04g41500.1	--	expressed protein
Seita.5G410800	blue	yes	3283.39	0.893157	AT3G09410.1	--	Pectinacetylesterase family protein	LOC_Os01g66830.1	--	pectinacetylesterase domain containing protein, expressed
Seita.9G131300	blue	yes	3259.05	0.893069	AT2G43820.1	ATSAGT1,GT,SAGT1,SGT1,UGT74F2	UDP-glucosyltransferase 74F2	LOC_Os03g48740.1	--	indole-3-acetate beta-glucosyltransferase, putative, expressed
Seita.8G026400	blue	yes	3494.58	0.893062	AT3G10190.1	--	Calcium-binding EF-hand family protein	LOC_Os12g04360.1	--	calmodulin-like protein 1, putative, expressed
Seita.3G200200	blue	yes	3212.44	0.893057	AT1G79620.1	--	Leucine-rich repeat protein kinase family protein	LOC_Os05g40770.1	--	leucine-rich repeat family protein, putative, expressed
Seita.3G014400	blue	yes	3354.23	0.892942	AT2G20780.1	--	Major facilitator superfamily protein	LOC_Os04g58230.1	--	transporter family protein, putative, expressed
Seita.5G251000	blue	yes	3256.39	0.892495	AT1G14290.1	SBH2	sphingoid base hydroxylase 2	LOC_Os01g46940.1	--	sphingolipid C4-hydroxylase SUR2, putative, expressed
Seita.5G394100	blue	yes	3493.06	0.892461	--	--	--	LOC_Os03g24680.1	--	terpene synthase, putative, expressed
Seita.9G142200	blue	yes	3512.33	0.892119	--	--	--	LOC_Os03g47034.1	--	expressed protein
Seita.9G327500	blue	yes	3556.31	0.892024	AT4G16600.1	--	Nucleotide-diphospho-sugar transferases superfamily protein	LOC_Os10g40640.1	--	glycosyl transferase 8 domain containing protein, putative, expressed
Seita.6G232500	blue	yes	3496.83	0.891998	AT1G08320.1	bZIP21,TGA9	bZIP transcription factor family protein	LOC_Os11g05480.1	--	transcription factor, putative, expressed
Seita.8G125600	blue	yes	3331.93	0.891786	AT4G24960.1	ATHVA22D,HVA22D	HVA22 homologue D	LOC_Os11g30500.1	--	HVA22, putative, expressed
Seita.1G309800	blue	yes	3314.83	0.891683	AT5G37690.1	--	SGNH hydrolase-type esterase superfamily protein	LOC_Os06g14630.1	--	GDSL-like lipase/acylhydrolase, putative, expressed
Seita.4G008800	blue	yes	3491.46	0.891621	AT3G03050.1	ATCSLD3,CSLD3,KJK	cellulose synthase-like D3	LOC_Os06g02180.1	--	CSLD2 - cellulose synthase-like family D, expressed
Seita.9G463100	blue	yes	3407.08	0.891582	AT2G02850.1	ARPN	plantacyanin	LOC_Os03g15340.1	--	plastocyanin-like domain containing protein, putative, expressed
Seita.9G250200	blue	yes	3475.44	0.89157	AT3G50210.3	--	2-oxoglutarate (2OG) and Fe(II)-dependent oxygenase superfamily protein	LOC_Os09g07020.1	--	oxidoreductase, putative, expressed
Seita.4G079000	blue	yes	3441.3	0.891258	AT2G26530.2	AR781	Protein of unknown function (DUF1645)	LOC_Os06g11150.1	--	DUF1645 domain containing protein, putative, expressed
Seita.2G033200	blue	yes	3477.36	0.891209	AT1G78380.1	ATGSTU19,GST8,GSTU19	glutathione S-transferase TAU 19	LOC_Os07g05800.1	--	glutathione S-transferase, N-terminal domain containing protein, expressed
Seita.8G206700	blue	yes	3265.85	0.891172	--	--	--	--	--	--
Seita.9G210600	blue	yes	3385.41	0.891067	--	--	--	--	--	--
Seita.7G092100	blue	yes	3658.7	0.891018	AT1G30300.1	--	Metallo-hydrolase/oxidoreductase superfamily protein	LOC_Os03g44140.1	--	OsWAK26 - OsWAK receptor-like protein kinase, expressed
Seita.2G216600	blue	yes	3375.14	0.890993	AT4G16770.1	--	2-oxoglutarate (2OG) and Fe(II)-dependent oxygenase superfamily protein	LOC_Os10g37899.1	--	transposon protein, putative, unclassified, expressed
Seita.6G038300	blue	yes	3448.27	0.890763	AT5G39110.1	--	RmlC-like cupins superfamily protein	LOC_Os08g09010.1	--	Cupin domain containing protein, expressed
Seita.4G114700	blue	yes	3291.59	0.890752	AT5G37690.1	--	SGNH hydrolase-type esterase superfamily protein	LOC_Os06g14630.1	--	GDSL-like lipase/acylhydrolase, putative, expressed
Seita.7G002400	blue	yes	3261.73	0.890485	AT4G34390.1	XLG2	extra-large GTP-binding protein 2	LOC_Os01g74620.1	--	expressed protein
Seita.2G336100	blue	yes	3188.95	0.890466	AT4G23930.1	--	Late embryogenesis abundant (LEA) hydroxyproline-rich glycoprotein family	LOC_Os07g34050.1	--	harpin-induced protein 1 domain containing protein, expressed
Seita.5G318800	blue	yes	3327.75	0.890291	AT5G48930.1	HCT	hydroxycinnamoyl-CoA shikimate/quinate hydroxycinnamoyl transferase	LOC_Os04g56910.1	--	transferase family protein, putative, expressed
Seita.3G009500	blue	yes	3349.57	0.890014	AT2G27370.1	--	Uncharacterised protein family (UPF0497)	LOC_Os04g58760.1	--	membrane associated DUF588 domain containing protein, putative, expressed
Seita.9G210400	blue	yes	3368.81	0.889978	--	--	--	LOC_Os02g42450.1	--	RIPER1 - Ripening-related family protein precursor, expressed
Seita.9G212000	blue	yes	3254.04	0.889945	--	--	--	LOC_Os10g34760.1	--	RIPER3 - Ripening-related family protein precursor, putative, expressed
Seita.7G018700	blue	yes	3307.06	0.889918	AT5G45480.1	--	Protein of unknown function (DUF594)	LOC_Os04g06990.1	--	expressed protein
Seita.5G241800	blue	yes	3295.81	0.889512	AT3G25690.1	CHUP1	Hydroxyproline-rich glycoprotein family protein	LOC_Os12g01449.1	--	chloroplast unusual positioning protein, putative, expressed
Seita.2G380400	blue	yes	3326.89	0.889311	AT4G27250.1	--	NAD(P)-binding Rossmann-fold superfamily protein	LOC_Os07g40986.1	--	NAD dependent epimerase/dehydratase family protein, putative, expressed
Seita.7G107800	blue	yes	3481.66	0.889049	AT4G37850.1	--	basic helix-loop-helix (bHLH) DNA-binding superfamily protein	LOC_Os03g46860.1	--	helix-loop-helix DNA-binding protein, putative, expressed
Seita.6G090100	blue	yes	3499.85	0.888932	AT4G33420.1	--	Peroxidase superfamily protein	LOC_Os08g02110.1	--	peroxidase precursor, putative, expressed
Seita.2G162900	blue	yes	3499.57	0.888932	AT5G47960.1	ATRABA4C,RABA4C,SMG1	RAB GTPase homolog A4C	LOC_Os09g10940.1	--	ras-related protein, putative, expressed
Seita.2G231800	blue	yes	3223.71	0.888645	AT1G49670.1	NQR	ARP protein (REF)	LOC_Os09g28570.1	--	zinc-binding alcohol dehydrogenase domain-containing protein 2, putative, expressed
Seita.1G288000	blue	yes	3366.94	0.888432	AT1G31720.1	--	Protein of unknown function (DUF1218)	LOC_Os02g47450.1	--	expressed protein
Seita.6G228200	blue	yes	3483.43	0.888299	AT5G61820.1	--	--	LOC_Os08g42590.3	--	mtN19, putative, expressed
Seita.9G050900	blue	yes	3261.24	0.888186	AT1G59710.1	--	Protein of unknown function (DUF569)	LOC_Os03g58740.1	--	expressed protein
Seita.2G219300	blue	yes	3487.98	0.888088	AT5G07990.1	CYP75B1,D501,TT7	Cytochrome P450 superfamily protein	LOC_Os09g26960.1	--	cytochrome P450, putative, expressed
Seita.3G369200	blue	yes	3597.49	0.887743	AT1G27730.1	STZ,ZAT10	salt tolerance zinc finger	LOC_Os12g39400.1	--	ZOS12-09 - C2H2 zinc finger protein, expressed
Seita.5G188900	blue	yes	3254.1	0.887331	--	--	--	LOC_Os01g31850.1	--	expressed protein
Seita.6G095200	blue	yes	3440.93	0.88732	AT4G31590.1	ATCSLC05,ATCSLC5,CSLC05,CSLC5	Cellulose-synthase-like C5	LOC_Os08g15420.1	--	CSLC3 - cellulose synthase-like family C, expressed
Seita.2G044200	blue	yes	3271.74	0.887317	AT2G32300.1	UCC1	uclacyanin 1	LOC_Os03g57740.1	--	plastocyanin-like domain containing protein, putative, expressed
Seita.6G093400	blue	yes	3515.08	0.88731	AT3G21240.1	4CL2,AT4CL2	4-coumarate:CoA ligase 2	LOC_Os08g14760.1	--	AMP-binding domain containing protein, expressed
Seita.9G333800	blue	yes	3321.39	0.887225	AT1G76640.1	--	Calcium-binding EF-hand family protein	LOC_Os01g72530.1	--	OsCML31 - Calmodulin-related calcium sensor protein, expressed
Seita.4G054100	blue	yes	3384.58	0.887141	AT5G20550.1	--	2-oxoglutarate (2OG) and Fe(II)-dependent oxygenase superfamily protein	LOC_Os06g08060.1	--	leucoanthocyanidin dioxygenase, putative, expressed
Seita.7G184000	blue	yes	3234.91	0.886899	AT3G02210.1	COBL1	COBRA-like protein 1 precursor	LOC_Os04g45700.1	--	COBRA, putative, expressed
Seita.2G300900	blue	yes	3224.87	0.886604	AT1G20780.1	ATPUB44,PUB44,SAUL1	senescence-associated E3 ubiquitin ligase 1	LOC_Os12g17880.1	--	armadillo/beta-catenin repeat protein-related, putative, expressed
Seita.3G164900	blue	yes	3262.46	0.886489	AT5G64810.1	ATWRKY51,WRKY51	WRKY DNA-binding protein 51	LOC_Os05g46020.1	--	WRKY7, expressed
Seita.3G007200	blue	yes	3220.88	0.886376	AT2G35930.1	PUB23	plant U-box 23	LOC_Os04g58920.1	--	U-box domain-containing protein, putative, expressed
Seita.8G212900	blue	yes	3414.05	0.886276	AT3G09220.1	LAC7	laccase 7	LOC_Os11g42200.1	--	laccase precursor protein, putative, expressed
Seita.1G315600	blue	yes	3596.11	0.886273	AT1G70170.1	MMP	matrix metalloproteinase	LOC_Os02g50730.1	--	metalloendoproteinase 1 precursor, putative, expressed
Seita.2G264300	blue	yes	3597.34	0.885783	AT3G25030.1	--	RING/U-box superfamily protein	LOC_Os09g32730.1	--	zinc finger, C3HC4 type domain containing protein, expressed
Seita.3G229700	blue	yes	3236.35	0.885508	AT5G17210.1	--	Protein of unknown function (DUF1218)	LOC_Os05g35960.1	--	expressed protein
Seita.7G036600	blue	yes	3403.69	0.8854	AT5G13930.1	ATCHS,CHS,TT4	Chalcone and stilbene synthase family protein	LOC_Os11g32650.1	--	chalcone synthase, putative, expressed
Seita.5G303700	blue	yes	3367.53	0.885378	AT1G29640.1	--	Protein of unknown function, DUF584	LOC_Os01g52730.1	--	DUF584 domain containing protein, putative, expressed
Seita.5G380200	blue	yes	3345.68	0.885334	AT5G02090.1	--	--	LOC_Os01g62830.1	--	expressed protein
Seita.5G362000	blue	yes	3534.47	0.885251	AT2G46400.1	ATWRKY46,WRKY46	WRKY DNA-binding protein 46	LOC_Os01g60640.1	--	WRKY21, expressed
Seita.3G165200	blue	yes	3294.72	0.885139	AT3G54320.1	ASML1,ATWRI1,WRI,WRI1	Integrase-type DNA-binding superfamily protein	LOC_Os05g45954.1	--	AP2 domain containing protein, expressed
Seita.2G137500	blue	yes	3459.06	0.885138	AT4G14465.1	AHL20	AT-hook motif nuclear-localized protein 20	LOC_Os08g44910.1	--	DNA binding protein, putative, expressed
Seita.8G105700	blue	yes	3479.14	0.885083	AT4G35150.1	--	O-methyltransferase family protein	LOC_Os11g20090.1	--	O-methyltransferase, putative, expressed
Seita.1G042800	blue	yes	3409.52	0.885049	AT2G26710.1	BAS1,CYP72B1,CYP734A1	Cytochrome P450 superfamily protein	LOC_Os02g11020.1	--	cytochrome P450 72A1, putative, expressed
Seita.7G155400	blue	yes	3365.9	0.885032	AT5G25120.1	CYP71B11	ytochrome p450, family 71, subfamily B, polypeptide 11	LOC_Os08g01450.1	--	cytochrome P450, putative, expressed
Seita.4G211000	blue	yes	3275.99	0.884992	AT1G76600.1	--	--	LOC_Os06g41940.1	--	expressed protein
Seita.2G407300	blue	yes	3297.54	0.884922	AT4G11290.1	--	Peroxidase superfamily protein	LOC_Os07g44550.1	--	peroxidase precursor, putative, expressed
Seita.8G145200	blue	yes	3429.96	0.884624	AT2G22900.1	--	Galactosyl transferase GMA12/MNN10 family protein	LOC_Os11g34390.1	--	glycosyltransferase, putative, expressed
Seita.5G149600	blue	yes	3456.57	0.884489	AT2G31090.1	--	--	LOC_Os01g11600.1	--	expressed protein
Seita.1G273600	blue	yes	3220.21	0.88447	AT5G24520.3	ATTTG1,TTG,TTG1,URM23	Transducin/WD40 repeat-like superfamily protein	LOC_Os02g45810.2	--	WD domain, G-beta repeat domain containing protein, expressed
Seita.6G098800	blue	yes	3316.15	0.884349	AT3G55090.1	--	ABC-2 type transporter family protein	LOC_Os09g23640.1	--	ABC-2 type transporter domain containing protein, expressed
Seita.3G189300	blue	yes	3266.34	0.884329	AT3G49950.1	--	GRAS family transcription factor	LOC_Os05g42130.1	--	MONOCULM 1, putative, expressed
Seita.2G434600	blue	yes	3444.55	0.884257	AT5G05190.1	--	Protein of unknown function (DUF3133)	LOC_Os07g48280.2	--	expressed protein
Seita.9G506700	blue	yes	3475.02	0.884256	AT5G47530.1	--	Auxin-responsive family protein	LOC_Os03g09900.1	--	membrane protein, putative, expressed
Seita.9G182900	blue	yes	3236.55	0.884255	--	--	--	LOC_Os03g37770.1	--	expressed protein
Seita.7G110900	blue	yes	3519.71	0.883998	--	--	--	--	--	--
Seita.9G303200	blue	yes	3240.38	0.883994	AT3G10450.1	SCPL7	serine carboxypeptidase-like 7	LOC_Os10g01134.1	--	OsSCP46 - Putative Serine Carboxypeptidase homologue, expressed
Seita.1G008500	blue	yes	3327.94	0.883719	AT1G20190.1	ATEXP11,ATEXPA11,ATHEXP ALPHA 1.14,EXP11,EXPA11	expansin 11	LOC_Os02g16730.1	--	expansin precursor, putative, expressed
Seita.9G034100	blue	yes	3457.83	0.883171	AT3G46080.1	--	C2H2-type zinc finger family protein	LOC_Os03g60570.1	--	ZOS3-22 - C2H2 zinc finger protein, expressed
Seita.6G048500	blue	yes	3309.36	0.882964	AT3G14490.1	--	Terpenoid cyclases/Protein prenyltransferases superfamily protein	LOC_Os01g23530.1	--	terpene synthase, putative, expressed
Seita.3G135500	blue	yes	3326.31	0.88292	AT1G18530.1	--	EF hand calcium-binding protein family	LOC_Os05g50180.1	--	OsCML14 - Calmodulin-related calcium sensor protein, expressed
Seita.3G326700	blue	yes	3356.14	0.882842	AT3G09390.1	ATMT-1,ATMT-K,MT2A	metallothionein 2A	LOC_Os12g38270.1	--	metallothionein, putative, expressed
Seita.3G380500	blue	yes	3245.35	0.882717	--	--	--	LOC_Os10g28050.1	--	chitinase 2, putative, expressed
Seita.2G138400	blue	yes	3320.47	0.882685	AT3G23240.1	ATERF1,ERF1	ethylene response factor 1	LOC_Os09g39850.1	--	AP2 domain containing protein, expressed
Seita.5G022600	blue	yes	3459.12	0.882604	AT4G02330.1	ATPMEPCRB	Plant invertase/pectin methylesterase inhibitor superfamily	LOC_Os01g20980.1	--	pectinesterase, putative, expressed
Seita.2G065300	blue	yes	3196.22	0.882577	AT2G43120.1	--	RmlC-like cupins superfamily protein	LOC_Os03g62790.2	--	pirin, putative, expressed
Seita.1G148300	blue	yes	3221.18	0.882549	AT1G20030.2	--	Pathogenesis-related thaumatin superfamily protein	LOC_Os10g05660.1	--	thaumatin, putative, expressed
Seita.2G187300	blue	yes	3273.34	0.882444	AT4G39830.1	--	Cupredoxin superfamily protein	LOC_Os09g20090.1	--	L-ascorbate oxidase precursor, putative, expressed
Seita.3G341700	blue	yes	3229.65	0.881982	AT2G02120.1	LCR70,PDF2.1	Scorpion toxin-like knottin superfamily protein	LOC_Os04g11165.1	--	gamma-thionin family domain containing protein, expressed
Seita.2G240500	blue	yes	3329.96	0.88183	AT1G17840.1	ABCG11,ATWBC11,COF1,DSO,WBC11	white-brown complex homolog protein 11	LOC_Os09g29660.1	--	white-brown complex homolog protein 11, putative, expressed
Seita.5G129900	blue	yes	3435.29	0.881453	AT1G71710.1	--	DNAse I-like superfamily protein	LOC_Os01g08780.1	--	endonuclease/exonuclease/phosphatase family domain containing protein, expressed
Seita.6G165800	blue	yes	3248.88	0.881412	AT2G23810.1	TET8	tetraspanin8	LOC_Os08g34460.1	--	tetraspanin family protein, putative, expressed
Seita.2G069100	blue	yes	3232.57	0.881273	AT5G58840.1	--	Subtilase family protein	LOC_Os01g52750.1	--	OsSub3 - Putative Subtilisin homologue, expressed
Seita.8G090400	blue	yes	3368.59	0.881241	AT5G16080.1	AtCXE17,CXE17	carboxyesterase 17	LOC_Os11g04350.1	--	cell death associated protein, putative, expressed
Seita.2G234300	blue	yes	3246.74	0.881107	AT3G63470.1	scpl40	serine carboxypeptidase-like 40	LOC_Os09g28840.1	--	OsSCP43 - Putative Serine Carboxypeptidase homologue, expressed
Seita.5G360900	blue	yes	3174.34	0.88108	AT5G05190.1	--	Protein of unknown function (DUF3133)	LOC_Os01g60420.1	--	expressed protein
Seita.3G069500	blue	yes	3379.75	0.880976	AT3G19430.1	--	late embryogenesis abundant protein-related / LEA protein-related	LOC_Os05g01680.1	--	RCLEA7 - Root cap and Late embryogenesis related family protein precursor, expressed
Seita.6G038100	blue	yes	3402.11	0.880726	AT5G39110.1	--	RmlC-like cupins superfamily protein	LOC_Os08g09010.1	--	Cupin domain containing protein, expressed
Seita.1G182300	blue	yes	3176.02	0.880664	AT2G36090.1	--	F-box family protein	LOC_Os02g33240.1	--	OsFBX51 - F-box domain containing protein, expressed
Seita.7G014800	blue	yes	3475.14	0.880441	AT3G14470.1	--	NB-ARC domain-containing disease resistance protein	LOC_Os04g02030.1	--	rp1, putative, expressed
Seita.3G093300	blue	yes	3271.79	0.880049	AT1G59740.1	--	Major facilitator superfamily protein	LOC_Os12g12934.1	--	peptide transporter PTR3-A, putative, expressed
Seita.9G186000	blue	yes	3323.59	0.880026	AT3G22060.1	--	Receptor-like protein kinase-related family protein	LOC_Os03g36650.1	--	cysteine-rich repeat secretory protein 55 precursor, putative, expressed
Seita.8G212300	blue	yes	3415.22	0.879998	AT2G20340.1	--	Pyridoxal phosphate (PLP)-dependent transferases superfamily protein	LOC_Os08g04560.1	--	decarboxylase, putative, expressed
Seita.4G115300	blue	yes	3258.77	0.879988	AT1G52820.1	--	2-oxoglutarate (2OG) and Fe(II)-dependent oxygenase superfamily protein	LOC_Os11g16450.1	--	retrotransposon protein, putative, Ty3-gypsy subclass, expressed
Seita.5G344200	blue	yes	3418.5	0.879564	AT2G23620.1	ATMES1,MES1	methyl esterase 1	LOC_Os01g57770.1	--	OsPOP4 - Putative Prolyl Oligopeptidase homologue, expressed
Seita.5G133700	blue	yes	3242.45	0.879552	AT4G29740.2	ATCKX4,CKX4	cytokinin oxidase 4	LOC_Os01g09260.1	--	cytokinin dehydrogenase precursor, putative, expressed
Seita.8G145400	blue	yes	3258.65	0.879364	AT4G37690.1	--	Galactosyl transferase GMA12/MNN10 family protein	LOC_Os11g34390.1	--	glycosyltransferase, putative, expressed
Seita.9G188900	blue	yes	3285.06	0.8792	AT3G05975.1	--	Late embryogenesis abundant (LEA) hydroxyproline-rich glycoprotein family	LOC_Os06g32970.1	--	harpin-induced protein 1 domain containing protein, expressed
Seita.2G280400	blue	yes	3368.97	0.878938	AT4G25480.1	ATCBF3,CBF3,DREB1A	dehydration response element B1A	LOC_Os09g35030.1	--	dehydration-responsive element-binding protein, putative, expressed
Seita.5G152000	blue	yes	3468.49	0.878636	AT1G68810.1	--	basic helix-loop-helix (bHLH) DNA-binding superfamily protein	LOC_Os01g11910.1	--	basic helix-loop-helix, putative, expressed
Seita.2G145700	blue	yes	3204.64	0.87857	AT2G45550.1	CYP76C4	cytochrome P450, family 76, subfamily C, polypeptide 4	LOC_Os09g27500.1	--	cytochrome P450, putative, expressed
Seita.7G082000	blue	yes	3270.22	0.878431	--	--	--	LOC_Os04g32860.1	--	expressed protein
Seita.2G276300	blue	yes	3341.76	0.878155	AT2G43820.1	ATSAGT1,GT,SAGT1,SGT1,UGT74F2	UDP-glucosyltransferase 74F2	LOC_Os09g34250.1	--	UDP-glucoronosyl and UDP-glucosyl transferase domain containing protein, expressed
Seita.1G341100	blue	yes	3189.84	0.878093	AT1G19210.1	--	Integrase-type DNA-binding superfamily protein	LOC_Os02g54050.1	--	ethylene-responsive transcription factor, putative, expressed
Seita.9G291900	blue	yes	3172.59	0.878022	AT1G20350.1	ATTIM17-1,TIM17-1	translocase inner membrane subunit 17-1	LOC_Os07g41330.1	--	mitochondrial import inner membrane translocase subunit Tim17, putative, expressed
Seita.8G139200	blue	yes	3310.18	0.877882	AT1G28130.1	GH3.17	Auxin-responsive GH3 family protein	LOC_Os11g32520.1	--	OsGH3.13 - Probable indole-3-acetic acid-amido synthetase, expressed
Seita.8G108400	blue	yes	3451.69	0.877656	AT4G35160.1	--	O-methyltransferase family protein	LOC_Os11g20090.1	--	O-methyltransferase, putative, expressed
Seita.5G323400	blue	yes	3383.64	0.877506	AT1G78440.1	ATGA2OX1,GA2OX1	Arabidopsis thaliana gibberellin 2-oxidase 1	LOC_Os01g55240.1	--	gibberellin 2-beta-dioxygenase, putative, expressed
Seita.5G192700	blue	yes	3398.14	0.877455	AT5G64700.1	--	nodulin MtN21 /EamA-like transporter family protein	LOC_Os01g36580.1	--	auxin-induced protein 5NG4, putative, expressed
Seita.4G287100	blue	yes	3249.11	0.877402	AT4G37420.1	--	Domain of unknown function (DUF23)	LOC_Os06g51210.1	--	zinc finger family protein, putative, expressed
Seita.7G117500	blue	yes	3225.16	0.877071	AT3G60520.1	--	--	LOC_Os04g37700.1	--	expressed protein
Seita.9G553100	blue	yes	3285.67	0.877055	AT2G17220.1	--	Protein kinase superfamily protein	LOC_Os03g03890.1	--	protein kinase family protein, putative, expressed
Seita.8G163000	blue	yes	3215.49	0.876957	--	--	--	--	--	--
Seita.5G460900	blue	yes	3545.07	0.876519	AT1G21740.1	--	Protein of unknown function (DUF630 and DUF632)	LOC_Os01g72970.1	--	DUF630/DUF632 domains containing protein, putative, expressed
Seita.4G118300	blue	yes	3220.43	0.876211	AT1G14870.1	PCR2	PLANT CADMIUM RESISTANCE 2	LOC_Os03g61500.1	--	uncharacterized Cys-rich domain containing protein, putative, expressed
Seita.7G110400	blue	yes	3305.75	0.876054	AT4G10350.1	ANAC070,BRN2,NAC070	NAC domain containing protein 70	LOC_Os06g33940.1	--	NAC domain containing protein, putative, expressed
Seita.4G172700	blue	yes	3219.6	0.875947	AT4G40070.1	--	RING/U-box superfamily protein	LOC_Os06g34640.1	--	zinc finger, C3HC4 type domain containing protein, expressed
Seita.5G392700	blue	yes	3319.72	0.875855	AT2G35930.1	PUB23	plant U-box 23	LOC_Os01g64570.1	--	U-box domain-containing protein, putative, expressed
Seita.4G137600	blue	yes	3227.72	0.875751	AT5G04370.2	NAMT1	S-adenosyl-L-methionine-dependent methyltransferases superfamily protein	LOC_Os06g20920.1	--	SAM dependent carboxyl methyltransferase, putative, expressed
Seita.9G085900	blue	yes	3431.21	0.875661	AT3G02100.1	--	UDP-Glycosyltransferase superfamily protein	LOC_Os03g55050.1	--	UDP-glucoronosyl and UDP-glucosyl transferase domain containing protein, expressed
Seita.5G157700	blue	yes	3207.44	0.87541	AT1G02400.1	ATGA2OX4,ATGA2OX6,DTA1,GA2OX6	gibberellin 2-oxidase 6	LOC_Os05g06670.1	--	gibberellin 2-oxidase, putative, expressed
Seita.3G064200	blue	yes	3209.58	0.875397	AT2G25430.1	--	epsin N-terminal homology (ENTH) domain-containing protein / clathrin assembly protein-related	LOC_Os05g02140.1	--	clathrin assembly protein, putative, expressed
Seita.5G303800	blue	yes	3413.38	0.875315	AT1G29640.1	--	Protein of unknown function, DUF584	LOC_Os01g52740.1	--	expressed protein
Seita.5G469200	blue	yes	3556.48	0.875283	AT2G39650.1	--	Protein of unknown function (DUF506)	LOC_Os01g74250.1	--	plant-specific domain TIGR01615 family protein, expressed
Seita.5G284200	blue	yes	3323.5	0.874909	--	--	--	--	--	--
Seita.2G234800	blue	yes	3205.99	0.874884	AT3G63470.1	scpl40	serine carboxypeptidase-like 40	LOC_Os09g28840.1	--	OsSCP43 - Putative Serine Carboxypeptidase homologue, expressed
Seita.2G433600	blue	yes	3194.89	0.874575	AT2G40750.1	ATWRKY54,WRKY54	WRKY DNA-binding protein 54	LOC_Os07g48260.1	--	WRKY47, expressed
Seita.7G279500	blue	yes	3339.47	0.874496	AT4G33450.1	ATMYB69,MYB69	myb domain protein 69	LOC_Os11g10130.1	--	MYB family transcription factor, putative, expressed
Seita.9G550100	blue	yes	3449.77	0.874413	AT2G46660.1	CYP78A6	cytochrome P450, family 78, subfamily A, polypeptide 6	LOC_Os03g04190.1	--	cytochrome P450, putative, expressed
Seita.7G228700	blue	yes	3329.5	0.874191	AT4G29905.1	--	--	LOC_Os04g51680.1	--	expressed protein
Seita.4G242800	blue	yes	3200.43	0.87412	AT2G01600.1	--	ENTH/ANTH/VHS superfamily protein	LOC_Os06g48630.1	--	ANTH/ENTH domain containing protein, putative, expressed
Seita.6G038500	blue	yes	3308.49	0.874047	AT5G39110.1	--	RmlC-like cupins superfamily protein	LOC_Os12g05860.1	--	Cupin domain containing protein, expressed
Seita.9G074800	blue	yes	3456.78	0.874029	AT5G57620.1	AtMYB36,MYB36	myb domain protein 36	LOC_Os03g56090.1	--	MYB family transcription factor, putative, expressed
Seita.9G138700	blue	yes	3213.39	0.873918	AT5G48930.1	HCT	hydroxycinnamoyl-CoA shikimate/quinate hydroxycinnamoyl transferase	LOC_Os03g47860.1	--	transferase family protein, putative, expressed
Seita.3G389400	blue	yes	3507.54	0.873735	AT5G06490.1	--	RING/U-box superfamily protein	LOC_Os07g06560.1	--	zinc finger, C3HC4 type domain containing protein, expressed
Seita.5G466300	blue	yes	3260.49	0.873537	AT3G19430.1	--	late embryogenesis abundant protein-related / LEA protein-related	LOC_Os01g73730.1	--	RCLEA5 - Root cap and Late embryogenesis related family protein precursor, expressed
Seita.1G155300	blue	yes	3244.39	0.873497	AT3G26280.1	CYP71B4	cytochrome P450, family 71, subfamily B, polypeptide 4	LOC_Os02g09220.1	--	cytochrome P450, putative, expressed
Seita.5G330000	blue	yes	3253.17	0.873358	AT3G45220.1	--	Serine protease inhibitor (SERPIN) family protein	LOC_Os01g56010.1	--	serpin domain containing protein, putative, expressed
Seita.3G292600	blue	yes	3186.38	0.873292	AT2G37880.1	--	Protein of unknown function, DUF617	LOC_Os05g20030.1	--	DUF617 domain containing protein, expressed
Seita.6G043900	blue	yes	3416.86	0.873029	--	--	--	--	--	--
Seita.9G402300	blue	yes	3446.71	0.87273	AT2G41430.4	CID1,ERD15,LSR1	dehydration-induced protein (ERD15)	LOC_Os03g23010.3	--	expressed protein
Seita.8G032800	blue	yes	3373.38	0.872686	AT3G19430.1	--	late embryogenesis abundant protein-related / LEA protein-related	LOC_Os11g05360.1	--	RCLEA9 - Root cap and Late embryogenesis related family protein precursor, putative, expressed
Seita.3G275600	blue	yes	3220.4	0.872615	AT5G49350.2	--	Glycine-rich protein family	LOC_Os05g28770.1	--	GCRP9 - Glycine and cysteine rich family protein precursor, expressed
Seita.7G178700	blue	yes	3489.38	0.872222	AT1G01800.1	--	NAD(P)-binding Rossmann-fold superfamily protein	LOC_Os04g44980.1	--	short-chain dehydrogenase/reductase, putative, expressed
Seita.7G296300	blue	yes	3127.59	0.872121	AT3G11650.1	NHL2	NDR1/HIN1-like 2	LOC_Os12g06220.1	--	harpin-induced protein 1 domain containing protein, expressed
Seita.4G192400	blue	yes	3168.49	0.872082	AT1G52540.1	--	Protein kinase superfamily protein	LOC_Os06g44430.1	--	protein kinase, putative, expressed
Seita.1G330300	blue	yes	3136.73	0.871908	AT2G03220.1	ATFT1,ATFUT1,FT1,MUR2	fucosyltransferase 1	LOC_Os02g52610.1	--	xyloglucan fucosyltransferase, putative, expressed
Seita.2G414200	blue	yes	3187.96	0.871791	AT5G19160.1	TBL11	TRICHOME BIREFRINGENCE-LIKE 11	LOC_Os07g46230.1	--	expressed protein
Seita.9G358800	blue	yes	3353.64	0.871758	AT4G37390.1	AUR3,BRU6,GH3-2,GH3.2,YDK1	Auxin-responsive GH3 family protein	LOC_Os07g40290.1	--	OsGH3.8 - Probable indole-3-acetic acid-amido synthetase, expressed
Seita.2G175600	blue	yes	3340.06	0.871652	AT1G64940.1	CYP89A6	cytochrome P450, family 87, subfamily A, polypeptide 6	LOC_Os10g37110.1	--	transposon protein, putative, unclassified, expressed
Seita.8G136000	blue	yes	3231.93	0.871596	AT1G11680.1	CYP51,CYP51A2,CYP51G1,EMB1738	CYTOCHROME P450 51G1	LOC_Os11g32240.1	--	cytochrome P450 51, putative, expressed
Seita.7G164900	blue	yes	3156.57	0.871496	AT4G26090.1	RPS2	NB-ARC domain-containing disease resistance protein	LOC_Os04g43440.1	--	NB-ARC/LRR disease resistance protein, putative, expressed
Seita.8G005200	blue	yes	3129.72	0.871422	AT2G27080.1	--	Late embryogenesis abundant (LEA) hydroxyproline-rich glycoprotein family	LOC_Os12g03370.1	--	harpin-induced protein 1 domain containing protein, expressed
Seita.1G075900	blue	yes	3253.35	0.87125	AT3G05950.1	--	RmlC-like cupins superfamily protein	LOC_Os02g29000.1	--	Cupin domain containing protein, expressed
Seita.5G294500	blue	yes	3147.03	0.871215	AT5G64810.1	ATWRKY51,WRKY51	WRKY DNA-binding protein 51	LOC_Os01g51690.1	--	WRKY26, expressed
Seita.3G374300	blue	yes	3190.21	0.871181	--	--	--	LOC_Os03g47034.1	--	expressed protein
Seita.3G149600	blue	yes	3367.93	0.870957	AT2G20080.1	--	--	LOC_Os05g48570.1	--	expressed protein
Seita.4G109000	blue	yes	3273.71	0.870746	AT5G37490.1	--	ARM repeat superfamily protein	LOC_Os06g13870.1	--	U-box protein CMPG1, putative, expressed
Seita.9G215100	blue	yes	3302.85	0.870648	--	--	--	LOC_Os10g34440.1	--	expressed protein
Seita.1G041400	blue	yes	3236.58	0.870414	AT3G47570.1	--	Leucine-rich repeat protein kinase family protein	LOC_Os07g03000.1	--	receptor-like protein kinase precursor, putative, expressed
Seita.6G243900	blue	yes	3344.52	0.870384	AT4G33790.1	CER4,FAR3,G7	Jojoba acyl CoA reductase-related male sterility protein	LOC_Os08g44360.1	--	male sterility protein 2, putative, expressed
Seita.5G386300	blue	yes	3286.2	0.870351	AT5G58860.1	CYP86,CYP86A1	cytochrome P450, family 86, subfamily A, polypeptide 1	LOC_Os01g63540.1	--	cytochrome P450, putative, expressed
Seita.8G106600	blue	yes	3224.42	0.870346	AT5G51890.1	--	Peroxidase superfamily protein	LOC_Os03g25320.1	--	peroxidase precursor, putative, expressed
Seita.9G346700	blue	yes	3439.65	0.87026	AT1G59670.1	ATGSTU15,GSTU15	glutathione S-transferase TAU 15	LOC_Os10g38489.1	--	glutathione S-transferase GSTU6, putative, expressed
Seita.J027200	blue	yes	3199.24	0.870227	AT4G36880.1	CP1	cysteine proteinase1	LOC_Os09g38920.1	--	thiol protease SEN102 precursor, putative, expressed
Seita.5G007400	blue	yes	3353.4	0.870186	AT2G25810.1	TIP4;1	tonoplast intrinsic protein 4;1	LOC_Os01g13130.1	--	aquaporin protein, putative, expressed
Seita.9G339100	blue	yes	3160.08	0.869968	AT3G12500.1	ATHCHIB,B-CHI,CHI-B,HCHIB,PR-3,PR3	basic chitinase	LOC_Os10g39680.1	--	CHIT14 - Chitinase family protein precursor, expressed
Seita.4G251200	blue	yes	3313.63	0.869942	AT1G72300.1	--	Leucine-rich receptor-like protein kinase family protein	LOC_Os06g47750.1	--	phytosulfokine receptor precursor, putative, expressed
Seita.9G081400	blue	yes	3249.46	0.869755	AT5G67400.1	RHS19	root hair specific 19	LOC_Os03g55410.1	--	peroxidase precursor, putative, expressed
Seita.3G111200	blue	yes	3080.87	0.86975	AT4G26270.1	PFK3	phosphofructokinase 3	LOC_Os01g09570.1	--	6-phosphofructokinase, putative, expressed
Seita.1G162800	blue	yes	3207.9	0.869661	AT3G05950.1	--	RmlC-like cupins superfamily protein	LOC_Os02g29000.1	--	Cupin domain containing protein, expressed
Seita.9G340500	blue	yes	3195.13	0.869608	AT5G23210.1	SCPL34	serine carboxypeptidase-like 34	LOC_Os10g39560.1	--	OsSCP47 - Putative Serine Carboxypeptidase homologue, expressed
Seita.2G257400	blue	yes	3254.63	0.869426	AT5G66580.1	--	--	LOC_Os09g32000.1	--	expressed protein
Seita.9G539400	blue	yes	3337.81	0.869363	AT2G42440.1	--	Lateral organ boundaries (LOB) domain family protein	LOC_Os03g05510.1	--	DUF260 domain containing protein, putative, expressed
Seita.7G131700	blue	yes	3202.46	0.869052	AT3G20180.1	--	Copper transport protein family	LOC_Os04g39010.1	--	heavy metal associated domain containing protein, expressed
Seita.9G430700	blue	yes	3184.97	0.869051	AT3G62720.2	ATXT1,XT1,XXT1	xylosyltransferase 1	LOC_Os03g19310.1	--	glycosyltransferase, putative, expressed
Seita.1G326000	blue	yes	3179.59	0.869007	AT4G08950.1	EXO	Phosphate-responsive 1 family protein	LOC_Os02g52000.1	--	phosphate-induced protein 1 conserved region domain containing protein, expressed
Seita.6G008800	blue	yes	3256.84	0.868682	AT5G63620.1	--	GroES-like zinc-binding alcohol dehydrogenase family protein	LOC_Os08g01760.1	--	dehydrogenase, putative, expressed
Seita.7G194800	blue	yes	3291.71	0.868648	AT4G01070.1	GT72B1,UGT72B1	UDP-Glycosyltransferase superfamily protein	LOC_Os04g47720.1	--	cis-zeatin O-glucosyltransferase, putative, expressed
Seita.9G140600	blue	yes	3173.31	0.868603	AT5G59540.1	--	2-oxoglutarate (2OG) and Fe(II)-dependent oxygenase superfamily protein	LOC_Os01g35230.1	--	1-aminocyclopropane-1-carboxylate oxidase homolog 1, putative, expressed
Seita.5G373200	blue	yes	3594.76	0.868522	AT3G12360.1	ITN1	Ankyrin repeat family protein	LOC_Os01g61990.1	--	ankyrin repeat-containing protein, putative, expressed
Seita.3G102800	blue	yes	3212.15	0.868484	AT1G80180.1	--	--	LOC_Os05g08390.1	--	expressed protein
Seita.7G221700	blue	yes	3402.69	0.868405	AT2G34830.1	AtWRKY35,MEE24,WRKY35	WRKY DNA-binding protein 35	LOC_Os04g50920.1	--	WRKY37, expressed
Seita.9G338800	blue	yes	3267.74	0.868286	AT3G51430.1	SSL5,YLS2	Calcium-dependent phosphotriesterase superfamily protein	LOC_Os10g39710.1	--	strictosidine synthase, putative, expressed
Seita.7G094400	blue	yes	3482.35	0.868252	AT1G21326.1	--	VQ motif-containing protein	LOC_Os04g34050.1	--	VQ domain containing protein, putative, expressed
Seita.2G187000	blue	yes	3296.48	0.867719	AT2G26110.1	--	Protein of unknown function (DUF761)	LOC_Os09g19970.1	--	expressed protein
Seita.8G062500	blue	yes	3402.86	0.867584	AT1G77330.1	--	2-oxoglutarate (2OG) and Fe(II)-dependent oxygenase superfamily protein	LOC_Os11g08380.1	--	1-aminocyclopropane-1-carboxylate oxidase, putative, expressed
Seita.9G346100	blue	yes	3291.98	0.867111	AT1G10360.1	ATGSTU18,GST29,GSTU18	glutathione S-transferase TAU 18	LOC_Os10g38610.1	--	glutathione S-transferase, putative, expressed
Seita.8G202900	blue	yes	3460.97	0.867016	AT3G09220.1	LAC7	laccase 7	LOC_Os10g20610.1	--	laccase-15 precursor, putative, expressed
Seita.5G386200	blue	yes	3205.38	0.866993	AT3G18660.1	GUX1,PGSIP1	plant glycogenin-like starch initiation protein 1	LOC_Os01g65780.2	--	glycosyl transferase, putative, expressed
Seita.2G230500	blue	yes	3400.38	0.866932	AT4G34410.1	RRTF1	redox responsive transcription factor 1	LOC_Os09g28440.1	--	AP2 domain containing protein, expressed
Seita.8G210900	blue	yes	3237.11	0.866869	AT3G09220.1	LAC7	laccase 7	LOC_Os10g20610.1	--	laccase-15 precursor, putative, expressed
Seita.5G300600	blue	yes	3252.07	0.866754	AT3G14470.1	--	NB-ARC domain-containing disease resistance protein	LOC_Os01g52280.1	--	NB-ARC domain containing protein, expressed
Seita.9G014100	blue	yes	3215.89	0.866598	--	--	--	LOC_Os03g62770.1	--	expressed protein
Seita.3G106800	blue	yes	3129.49	0.866584	--	--	--	LOC_Os05g08900.1	--	expressed protein
Seita.9G029300	blue	yes	3377.25	0.866479	AT5G05880.1	--	UDP-Glycosyltransferase superfamily protein	LOC_Os03g60960.1	--	cytokinin-N-glucosyltransferase 1, putative, expressed
Seita.2G188800	blue	yes	3391.76	0.866464	AT4G39720.1	--	VQ motif-containing protein	LOC_Os09g20460.1	--	VQ domain containing protein, putative, expressed
Seita.5G307700	blue	yes	3375.44	0.866435	AT5G41570.1	ATWRKY24,WRKY24	WRKY DNA-binding protein 24	LOC_Os01g53260.1	--	WRKY23, expressed
Seita.9G182300	blue	yes	3184.88	0.866204	AT4G13420.1	ATHAK5,HAK5	high affinity K+ transporter 5	LOC_Os03g37930.1	--	potassium transporter, putative, expressed
Seita.7G223800	blue	yes	3296.57	0.866184	AT3G22370.1	AOX1A,ATAOX1A	alternative oxidase 1A	LOC_Os04g51160.1	--	transposon protein, putative, unclassified, expressed
Seita.9G346900	blue	yes	3103.87	0.866148	AT1G10360.1	ATGSTU18,GST29,GSTU18	glutathione S-transferase TAU 18	LOC_Os10g38489.1	--	glutathione S-transferase GSTU6, putative, expressed
Seita.1G299200	blue	yes	3195.8	0.865415	AT5G10770.1	--	Eukaryotic aspartyl protease family protein	LOC_Os02g48870.1	--	aspartic proteinase nepenthesin-2 precursor, putative, expressed
Seita.1G076500	blue	yes	3166.65	0.865341	--	--	--	--	--	--
Seita.3G043400	blue	yes	3166.03	0.865042	AT2G37330.1	ALS3	aluminum sensitive 3	LOC_Os05g02750.1	--	ABC transporter, membrane-spanning/permease subunit, putative, expressed
Seita.4G042500	blue	yes	3325.52	0.864762	AT1G72310.1	ATL3	RING/U-box superfamily protein	LOC_Os06g09310.1	--	zinc finger, C3HC4 type domain containing protein, expressed
Seita.7G089900	blue	yes	3454.27	0.864566	AT2G27550.1	ATC	centroradialis	LOC_Os04g33570.1	--	RCN4 Centroradialis-like1 homologous to TFL1 gene; contains Pfam profile PF01161: Phosphatidylethanolamine-binding protein, expressed
Seita.2G077200	blue	yes	3189.72	0.864391	AT5G19790.1	RAP2.11	related to AP2 11	LOC_Os07g10410.1	--	AP2 domain containing protein, expressed
Seita.1G336900	blue	yes	3157.23	0.864328	AT2G31945.1	--	--	LOC_Os02g53410.1	--	expressed protein
Seita.8G145300	blue	yes	3267.42	0.864019	AT2G22900.1	--	Galactosyl transferase GMA12/MNN10 family protein	LOC_Os11g34390.1	--	glycosyltransferase, putative, expressed
Seita.1G254000	blue	yes	3276.76	0.863785	AT5G53560.1	ATB5-A,ATCB5-E,B5 #2,CB5-E	cytochrome B5 isoform E	LOC_Os02g43360.1	--	cytochrome b5-like Heme/Steroid binding domain containing protein, expressed
Seita.2G262700	blue	yes	3302.49	0.863594	AT3G59070.1	--	Cytochrome b561/ferric reductase transmembrane with DOMON related domain	LOC_Os08g41290.1	--	AIR12, putative, expressed
Seita.6G078200	blue	yes	3198.9	0.863208	AT5G40780.1	LHT1	lysine histidine transporter 1	LOC_Os08g03350.1	--	amino acid transporter, putative, expressed
Seita.5G267100	blue	yes	3235.74	0.863143	AT3G14180.1	--	sequence-specific DNA binding transcription factors	LOC_Os01g48320.1	--	transcription factor like protein, putative, expressed
Seita.9G063400	blue	yes	3291.03	0.863123	AT3G11820.1	AT-SYR1,ATSYP121,ATSYR1,PEN1,SYP121,SYR1	syntaxin of plants 121	LOC_Os03g57310.1	--	syntaxin, putative, expressed
Seita.9G455500	blue	yes	3197.23	0.862893	AT4G08250.1	--	GRAS family transcription factor	LOC_Os03g15680.1	--	nodulation-signaling pathway 2 protein, putative, expressed
Seita.1G162700	blue	yes	3159.72	0.862696	AT4G14630.1	GLP9	germin-like protein 9	LOC_Os02g29000.1	--	Cupin domain containing protein, expressed
Seita.6G046100	blue	yes	3155.15	0.862689	AT3G29670.1	--	HXXXD-type acyl-transferase family protein	LOC_Os08g07730.1	--	transferase family protein, putative, expressed
Seita.6G096100	blue	yes	3260.63	0.862532	AT5G45890.1	SAG12	senescence-associated gene 12	LOC_Os04g13090.1	--	vignain precursor, putative, expressed
Seita.1G226500	blue	yes	3342.99	0.862421	AT3G59710.1	--	NAD(P)-binding Rossmann-fold superfamily protein	LOC_Os02g39490.1	--	carbonyl reductase 3, putative, expressed
Seita.6G200900	blue	yes	3401.36	0.86217	AT1G21240.1	WAK3	wall associated kinase 3	LOC_Os08g39210.1	--	OsWAK74 - OsWAK receptor-like protein kinase, expressed
Seita.4G121200	blue	yes	3417.67	0.862103	--	--	--	LOC_Os06g31960.1	--	THION5 - Plant thionin family protein precursor, expressed
Seita.4G033900	blue	yes	3112.47	0.861975	AT5G15130.1	ATWRKY72,WRKY72	WRKY DNA-binding protein 72	LOC_Os06g05380.1	--	WRKY73, expressed
Seita.4G033600	blue	yes	3316.39	0.861828	AT3G29680.1	--	HXXXD-type acyl-transferase family protein	LOC_Os06g05320.1	--	transferase family protein, putative, expressed
Seita.9G425100	blue	yes	3417.63	0.861644	AT5G49620.1	AtMYB78,MYB78	myb domain protein 78	LOC_Os03g20090.1	--	MYB family transcription factor, putative, expressed
Seita.8G124300	blue	yes	3164.12	0.861598	AT3G07040.1	RPM1,RPS3	NB-ARC domain-containing disease resistance protein	LOC_Os02g19890.1	--	stripe rust resistance protein Yr10, putative, expressed
Seita.9G302300	blue	yes	3178.56	0.861574	--	--	--	LOC_Os10g01240.1	--	VQ domain containing protein, putative, expressed
Seita.2G189100	blue	yes	3163.82	0.861476	AT5G10190.1	--	Major facilitator superfamily protein	LOC_Os09g20520.1	--	transporter-related, putative, expressed
Seita.5G131000	blue	yes	3145.34	0.861207	--	--	--	LOC_Os05g08860.1	--	expressed protein
Seita.7G253200	blue	yes	3428.96	0.861195	AT1G11330.2	--	S-locus lectin protein kinase family protein	LOC_Os04g54190.1	--	cysteine-rich receptor-like protein kinase 8 precursor, putative, expressed
Seita.5G033200	blue	yes	3425.89	0.861089	AT1G02360.1	--	Chitinase family protein	LOC_Os01g18400.1	--	CHIT10 - Chitinase family protein precursor, expressed
Seita.3G293100	blue	yes	3151.88	0.860967	AT2G26975.1	--	Ctr copper transporter family	LOC_Os03g25470.1	--	ctr copper transporter family protein, putative, expressed
Seita.1G217900	blue	yes	3174.94	0.860949	AT3G27540.1	--	beta-1,4-N-acetylglucosaminyltransferase family protein	LOC_Os02g38140.2	--	glycosyl transferase family 17 protein, putative, expressed
Seita.7G112800	blue	yes	3229.69	0.860718	--	--	--	LOC_Os04g36820.1	--	expressed protein
Seita.1G164800	blue	yes	3381.09	0.860632	AT2G37710.1	RLK	receptor lectin kinase	LOC_Os07g38810.1	--	lectin receptor-type protein kinase, putative, expressed
Seita.2G234400	blue	yes	3176.26	0.860614	AT3G63470.1	scpl40	serine carboxypeptidase-like 40	LOC_Os09g28830.1	--	OsSCP42 - Putative Serine Carboxypeptidase homologue, expressed
Seita.6G140300	blue	yes	3266.05	0.8606	AT2G16050.1	--	Cysteine/Histidine-rich C1 domain family protein	LOC_Os08g31250.1	--	C1-like domain containing protein, expressed
Seita.4G145700	blue	yes	3151.87	0.860458	AT3G12120.2	FAD2	fatty acid desaturase 2	LOC_Os02g48560.1	--	fatty acid desaturase, putative, expressed
Seita.6G011900	blue	yes	3255.91	0.860113	AT3G50270.1	--	HXXXD-type acyl-transferase family protein	LOC_Os08g01950.1	--	transferase family protein, putative, expressed
Seita.8G196000	blue	yes	3352.67	0.860051	AT5G49690.1	--	UDP-Glycosyltransferase superfamily protein	LOC_Os10g03320.1	--	UDP-glucoronosyl and UDP-glucosyl transferase domain containing protein, expressed
Seita.7G227500	blue	yes	3215.02	0.859962	AT3G23730.1	XTH16	xyloglucan endotransglucosylase/hydrolase 16	LOC_Os04g51510.1	--	glycosyl hydrolases family 16, putative, expressed
Seita.3G286100	blue	yes	3459.55	0.859906	--	--	--	LOC_Os05g25920.1	--	expressed protein
Seita.3G160800	blue	yes	3361.09	0.859804	AT4G26890.1	MAPKKK16	mitogen-activated protein kinase kinase kinase 16	LOC_Os05g46750.1	--	STE_MEKK_ste11_MAP3K.18 - STE kinases include homologs to sterile 7, sterile 11 and sterile 20 from yeast, expressed
Seita.8G105800	blue	yes	3376.15	0.859575	AT4G35150.1	--	O-methyltransferase family protein	LOC_Os11g20090.1	--	O-methyltransferase, putative, expressed
Seita.5G466200	blue	yes	3218.32	0.85943	AT3G19430.1	--	late embryogenesis abundant protein-related / LEA protein-related	LOC_Os01g73700.1	--	RCLEA2 - Root cap and Late embryogenesis related family protein precursor, putative, expressed
Seita.9G483200	blue	yes	3188.45	0.85942	AT1G75030.1	ATLP-3,TLP-3	thaumatin-like protein 3	LOC_Os03g13070.1	--	thaumatin family domain containing protein, expressed
Seita.8G101000	blue	yes	3464.04	0.859388	AT1G17950.1	ATMYB52,BW52,MYB52	myb domain protein 52	LOC_Os11g10130.1	--	MYB family transcription factor, putative, expressed
Seita.7G058800	blue	yes	3217.42	0.859265	AT5G41800.1	--	Transmembrane amino acid transporter family protein	LOC_Os05g50920.1	--	transmembrane amino acid transporter protein, putative, expressed
Seita.6G234700	blue	yes	3406.16	0.85922	--	--	--	LOC_Os04g38800.1	--	expressed protein
Seita.7G153900	blue	yes	3219.59	0.859122	AT1G75620.1	--	glyoxal oxidase-related protein	LOC_Os03g15320.1	--	glyoxal oxidase-related, putative, expressed
Seita.4G068000	blue	yes	3129.87	0.85895	AT5G03540.2	ATEXO70A1,EXO70A1	exocyst subunit exo70 family protein A1	LOC_Os09g17810.1	--	leucine zipper protein-like, putative, expressed
Seita.7G091600	blue	yes	3411.26	0.858937	AT3G52600.1	AtcwINV2,CWINV2	cell wall invertase 2	LOC_Os04g33740.1	--	glycosyl hydrolases, putative, expressed
Seita.7G010400	blue	yes	3204.92	0.858922	AT2G34410.1	--	O-acetyltransferase family protein	LOC_Os01g44040.1	--	CAS1 domain-containing protein 1 precursor, putative, expressed
Seita.2G292700	blue	yes	3408	0.858883	AT4G35840.1	--	RING/U-box superfamily protein	LOC_Os08g43670.1	--	RING-H2 finger protein ATL2B, putative, expressed
Seita.9G209300	blue	yes	3149.91	0.858812	AT2G15220.1	--	Plant basic secretory protein (BSP) family protein	LOC_Os10g34930.1	--	secretory protein, putative, expressed
Seita.8G231600	blue	yes	3154.12	0.858806	--	--	--	--	--	--
Seita.4G001700	blue	yes	3471.62	0.858733	AT5G42830.1	--	HXXXD-type acyl-transferase family protein	LOC_Os06g01350.1	--	transferase family protein, putative, expressed
Seita.2G165600	blue	yes	3657.17	0.858682	AT3G13380.1	BRL3	BRI1-like 3	LOC_Os09g12240.1	--	serine/threonine-protein kinase BRI1-like 1 precursor, putative, expressed
Seita.4G065700	blue	yes	3219.18	0.858491	AT4G27950.1	CRF4	cytokinin response factor 4	LOC_Os06g06540.1	--	AP2 domain containing protein, expressed
Seita.3G127900	blue	yes	3252.98	0.858484	AT5G41800.1	--	Transmembrane amino acid transporter family protein	LOC_Os05g50920.1	--	transmembrane amino acid transporter protein, putative, expressed
Seita.1G247000	blue	yes	3220.71	0.858462	--	--	--	LOC_Os02g42450.1	--	RIPER1 - Ripening-related family protein precursor, expressed
Seita.3G236000	blue	yes	3354.62	0.858366	AT1G21450.1	SCL1	SCARECROW-like 1	LOC_Os01g65900.1	--	chitin-inducible gibberellin-responsive protein, putative, expressed
Seita.3G201400	blue	yes	3148.77	0.85825	AT5G24910.1	CYP714A1	cytochrome P450, family 714, subfamily A, polypeptide 1	LOC_Os05g40384.1	--	cytochrome P450, putative, expressed
Seita.4G133300	blue	yes	3145.1	0.858195	AT5G10770.1	--	Eukaryotic aspartyl protease family protein	LOC_Os06g20110.1	--	expressed protein
Seita.1G242300	blue	yes	3228.33	0.85772	AT4G21200.1	ATGA2OX8,GA2OX8	gibberellin 2-oxidase 8	LOC_Os02g41954.1	--	gibberellin 2-beta-dioxygenase 7, putative, expressed
Seita.2G372600	blue	yes	3190.07	0.85732	--	--	--	LOC_Os07g39860.1	--	expressed protein
Seita.9G053700	blue	yes	3355.71	0.857309	AT2G30590.1	WRKY21	WRKY DNA-binding protein 21	LOC_Os03g58420.2	--	WRKY6, expressed
Seita.1G267400	blue	yes	3093.6	0.857246	AT1G76240.1	--	Arabidopsis protein of unknown function (DUF241)	LOC_Os02g44880.1	--	expressed protein
Seita.5G082800	blue	yes	3439.48	0.857045	--	--	--	--	--	--
Seita.5G283500	blue	yes	3217.33	0.856673	AT3G62150.1	PGP21	P-glycoprotein 21	LOC_Os01g50100.1	--	ABC transporter, ATP-binding protein, putative, expressed
Seita.9G205600	blue	yes	3272.56	0.85649	AT3G51000.1	--	alpha/beta-Hydrolases superfamily protein	LOC_Os10g35520.1	--	hydrolase, alpha/beta fold family domain containing protein, expressed
Seita.9G241000	blue	yes	3207.5	0.856319	AT5G25120.1	CYP71B11	ytochrome p450, family 71, subfamily B, polypeptide 11	LOC_Os10g30390.1	--	cytochrome P450, putative, expressed
Seita.8G192400	blue	yes	3306.04	0.856249	AT2G26560.1	PLA IIA,PLA2A,PLP2	phospholipase A 2A	LOC_Os11g39990.1	--	patatin, putative, expressed
Seita.1G164700	blue	yes	3355.08	0.856177	AT2G37710.1	RLK	receptor lectin kinase	LOC_Os07g38800.1	--	lectin-like receptor kinase, putative, expressed
Seita.6G062300	blue	yes	3168.66	0.856113	AT4G10380.1	NIP5;1,NLM6,NLM8	NOD26-like intrinsic protein 5;1	LOC_Os08g05590.1	--	aquaporin protein, putative, expressed
Seita.6G091300	blue	yes	3309.49	0.855967	AT4G30210.2	AR2,ATR2	P450 reductase 2	LOC_Os08g14570.1	--	NADPH reductase, putative, expressed
Seita.5G149000	blue	yes	3190.07	0.855966	AT2G42360.1	--	RING/U-box superfamily protein	LOC_Os01g11520.1	--	RING-H2 finger protein, putative, expressed
Seita.9G316500	blue	yes	3250.05	0.855762	AT5G17820.1	--	Peroxidase superfamily protein	LOC_Os10g41720.1	--	peroxidase precursor, putative, expressed
Seita.7G318900	blue	yes	3132.08	0.855049	AT4G15550.1	IAGLU	indole-3-acetate beta-D-glucosyltransferase	LOC_Os11g04860.1	--	anthocyanin 5-O-glucosyltransferase, putative, expressed
Seita.2G240600	blue	yes	3134.15	0.854898	AT4G30380.1	--	Barwin-related endoglucanase	LOC_Os09g29690.1	--	beta-expansin precursor, putative, expressed
Seita.6G174100	blue	yes	3121.7	0.854797	AT1G72610.1	ATGER1,GER1,GLP1	germin-like protein 1	LOC_Os04g22080.1	--	retrotransposon protein, putative, unclassified, expressed
Seita.8G210300	blue	yes	3179.98	0.854737	AT3G09220.1	LAC7	laccase 7	LOC_Os10g20610.1	--	laccase-15 precursor, putative, expressed
Seita.5G311600	blue	yes	3242.19	0.854732	AT5G56550.1	ATOXS3,OXS3	oxidative stress 3	LOC_Os01g53730.1	--	expressed protein
Seita.9G346800	blue	yes	3154.61	0.854596	AT1G10360.1	ATGSTU18,GST29,GSTU18	glutathione S-transferase TAU 18	LOC_Os10g38489.1	--	glutathione S-transferase GSTU6, putative, expressed
Seita.1G174600	blue	yes	3311.47	0.854459	AT1G12880.1	atnudt12,NUDT12	nudix hydrolase homolog 12	LOC_Os02g32060.1	--	hydrolase, NUDIX family, domain containing protein, expressed
Seita.6G184100	blue	yes	3418.1	0.854404	AT2G26560.1	PLA IIA,PLA2A,PLP2	phospholipase A 2A	LOC_Os08g28880.1	--	patatin, putative, expressed
Seita.4G192600	blue	yes	3457.31	0.854403	AT5G10720.1	AHK5,CKI2,HK5	histidine kinase 5	LOC_Os06g44410.1	--	histidine kinase, putative, expressed
Seita.6G172800	blue	yes	3404.91	0.854372	AT2G05940.1	--	Protein kinase superfamily protein	LOC_Os08g35600.1	--	tyrosine protein kinase domain containing protein, putative, expressed
Seita.6G063300	blue	yes	3173.83	0.854079	AT4G10380.1	NIP5;1,NLM6,NLM8	NOD26-like intrinsic protein 5;1	LOC_Os08g05590.1	--	aquaporin protein, putative, expressed
Seita.7G047600	blue	yes	3123.24	0.853519	AT5G48930.1	HCT	hydroxycinnamoyl-CoA shikimate/quinate hydroxycinnamoyl transferase	LOC_Os06g08640.1	--	transferase family protein, putative, expressed
Seita.1G311700	blue	yes	3321.34	0.853446	AT1G68070.1	--	Zinc finger, C3HC4 type (RING finger) family protein	LOC_Os02g45240.1	--	zinc finger family protein, putative, expressed
Seita.5G055400	blue	yes	3467.69	0.853418	AT3G14460.1	--	LRR and NB-ARC domains-containing disease resistance protein	LOC_Os01g15580.1	--	disease resistance protein RGA2, putative, expressed
Seita.9G374200	blue	yes	3236.23	0.853213	AT4G35160.1	--	O-methyltransferase family protein	LOC_Os05g43940.1	--	O-methyltransferase, putative, expressed
Seita.2G336200	blue	yes	3162.25	0.853076	AT3G54200.1	--	Late embryogenesis abundant (LEA) hydroxyproline-rich glycoprotein family	LOC_Os07g34040.1	--	harpin-induced protein 1 domain containing protein, expressed
Seita.6G049300	blue	yes	3260.38	0.852763	AT5G25280.1	--	serine-rich protein-related	LOC_Os02g55610.1	--	serine-rich protein, putative, expressed
Seita.2G199100	blue	yes	3128.61	0.852684	AT4G39330.1	ATCAD9,CAD9	cinnamyl alcohol dehydrogenase 9	LOC_Os09g23560.1	--	dehydrogenase, putative, expressed
Seita.4G132200	blue	yes	3362.84	0.852682	AT5G25610.1	ATRD22,RD22	BURP domain-containing protein	LOC_Os06g19800.1	--	BURP domain containing protein, expressed
Seita.8G141900	blue	yes	3242.41	0.852615	AT5G47910.1	ATRBOHD,RBOHD	respiratory burst oxidase homologue D	LOC_Os11g33120.1	--	respiratory burst oxidase, putative, expressed
Seita.8G146200	blue	yes	3265.51	0.852455	--	--	--	--	--	--
Seita.2G409500	blue	yes	3209.84	0.852261	AT1G28600.1	--	GDSL-like Lipase/Acylhydrolase superfamily protein	LOC_Os07g44780.1	--	GDSL-like lipase/acylhydrolase, putative, expressed
Seita.1G281400	blue	yes	3114.93	0.852097	AT1G05260.1	RCI3,RCI3A	Peroxidase superfamily protein	LOC_Os05g04490.1	--	peroxidase precursor, putative, expressed
Seita.3G253400	blue	yes	3150.79	0.852012	AT4G02900.1	--	ERD (early-responsive to dehydration stress) family protein	LOC_Os05g32720.1	--	early-responsive to dehydration protein-related, putative, expressed
Seita.1G278600	blue	yes	3417.38	0.851967	AT1G32460.1	--	--	LOC_Os04g49954.1	--	expressed protein
Seita.2G147600	blue	yes	3509.61	0.851962	AT1G15950.1	ATCCR1,CCR1,IRX4	cinnamoyl coa reductase 1	LOC_Os09g04050.1	--	dehydrogenase, putative, expressed
Seita.9G549100	blue	yes	3153.55	0.851811	AT4G27190.1	--	NB-ARC domain-containing disease resistance protein	LOC_Os01g58530.1	--	NB-ARC/LRR disease resistance protein, putative, expressed
Seita.7G128900	blue	yes	3113.62	0.851462	AT3G59110.1	--	Protein kinase superfamily protein	LOC_Os04g39180.1	--	nodulation receptor kinase precursor, putative, expressed
Seita.6G156800	blue	yes	3405.4	0.851309	AT3G57230.1	AGL16	AGAMOUS-like 16	LOC_Os02g36924.1	--	OsMADS27 - MADS-box family gene with MIKCc type-box, expressed
Seita.6G067700	blue	yes	3138.92	0.851264	AT2G20340.1	--	Pyridoxal phosphate (PLP)-dependent transferases superfamily protein	LOC_Os08g04540.1	--	decarboxylase, putative, expressed
Seita.9G086100	blue	yes	3269.58	0.851214	AT3G02100.1	--	UDP-Glycosyltransferase superfamily protein	LOC_Os03g55040.1	--	UDP-glucoronosyl and UDP-glucosyl transferase domain containing protein, expressed
Seita.9G306300	blue	yes	3292.87	0.851088	AT4G19010.1	--	AMP-dependent synthetase and ligase family protein	LOC_Os08g04770.1	--	AMP-binding domain containing protein, expressed
Seita.8G181100	blue	yes	3108.86	0.851065	AT5G09960.1	--	--	LOC_Os11g39010.2	--	expressed protein
Seita.9G159900	blue	yes	3279.23	0.85101	AT4G20380.2	LSD1	LSD1 zinc finger family protein	LOC_Os03g43840.1	--	LSD1 zinc finger domain containing protein, expressed
Seita.9G226500	blue	yes	3238.35	0.850956	AT1G67580.2	--	Protein kinase superfamily protein	LOC_Os10g06510.1	--	cyclin-dependent kinase G-1, putative, expressed
Seita.6G088700	blue	yes	3254.67	0.850887	--	--	--	LOC_Os08g02200.1	--	expressed protein
Seita.6G061000	blue	yes	3119.59	0.850841	AT3G48280.1	CYP71A25	cytochrome P450, family 71, subfamily A, polypeptide 25	LOC_Os08g01510.1	--	cytochrome P450, putative, expressed
Seita.1G166800	blue	yes	3120.94	0.850824	AT3G14460.1	--	LRR and NB-ARC domains-containing disease resistance protein	LOC_Os02g30150.1	--	disease resistance protein, putative, expressed
Seita.6G038800	blue	yes	3115.73	0.850575	AT5G39110.1	--	RmlC-like cupins superfamily protein	LOC_Os12g05860.1	--	Cupin domain containing protein, expressed
Seita.J003200	blue	yes	3319.78	0.850407	AT3G01190.1	--	Peroxidase superfamily protein	LOC_Os07g01400.1	--	peroxidase precursor, putative, expressed
Seita.6G216800	blue	yes	3344.54	0.85026	AT4G20820.1	--	FAD-binding Berberine family protein	LOC_Os06g35560.1	--	reticuline oxidase-like protein precursor, putative, expressed
Seita.2G043500	blue	yes	3128.45	0.850158	AT2G32300.1	UCC1	uclacyanin 1	LOC_Os07g07170.1	--	plastocyanin-like domain containing protein, putative, expressed
Seita.6G010700	blue	yes	3289.85	0.850137	AT1G10280.1	--	Core-2/I-branching beta-1,6-N-acetylglucosaminyltransferase family protein	LOC_Os08g01890.1	--	DNA binding protein, putative, expressed
Seita.2G280700	blue	yes	3147.89	0.850127	AT5G19790.1	RAP2.11	related to AP2 11	LOC_Os07g10410.1	--	AP2 domain containing protein, expressed
Seita.9G511000	blue	yes	3128.19	0.849995	AT1G22430.2	--	GroES-like zinc-binding dehydrogenase family protein	LOC_Os07g42924.1	--	dehydrogenase, putative, expressed
Seita.2G156100	blue	yes	3120.78	0.849915	AT5G47230.1	ATERF-5,ATERF5,ERF5	ethylene responsive element binding factor 5	LOC_Os04g46250.1	--	AP2 domain containing protein, expressed
Seita.J031700	blue	yes	3144.67	0.849827	AT5G06730.1	--	Peroxidase superfamily protein	LOC_Os03g13180.1	--	peroxidase precursor, putative, expressed
Seita.7G099600	blue	yes	3115.02	0.849734	AT3G19640.1	MGT4,MRS2-3	magnesium transporter 4	LOC_Os04g35160.1	--	CorA-like magnesium transporter protein, putative, expressed
Seita.2G288600	blue	yes	3318.61	0.849685	AT3G18773.1	--	RING/U-box superfamily protein	LOC_Os09g36500.1	--	zinc finger, C3HC4 type domain containing protein, expressed
Seita.5G087100	blue	yes	3267.45	0.84944	AT3G18170.1	--	Glycosyltransferase family 61 protein	LOC_Os01g02940.6	--	glycosyltransferase protein, putative, expressed
Seita.2G106200	blue	yes	3129	0.849356	AT2G18690.1	--	--	LOC_Os09g04339.1	--	expressed protein
Seita.4G067400	blue	yes	3134.97	0.849241	AT4G23850.1	LACS4	AMP-dependent synthetase and ligase family protein	LOC_Os06g06350.1	--	AMP-binding enzyme, putative, expressed
Seita.2G276800	blue	yes	3229.59	0.849179	AT2G40070.1	--	--	LOC_Os09g34290.1	--	transposon protein, putative, CACTA, En/Spm sub-class, expressed
Seita.9G369200	blue	yes	3071.23	0.848979	AT2G05940.1	--	Protein kinase superfamily protein	LOC_Os03g29410.1	--	tyrosine protein kinase domain containing protein, putative, expressed
Seita.6G212800	blue	yes	3060.76	0.848857	AT4G31540.1	ATEXO70G1,EXO70G1	exocyst subunit exo70 family protein G1	LOC_Os08g40840.1	--	exo70 exocyst complex subunit, putative, expressed
Seita.1G204000	blue	yes	3557.69	0.848813	AT5G64300.1	ATGCH,ATRIBA1,GCH,RFD1	GTP cyclohydrolase II	LOC_Os02g36340.1	--	riboflavin biosynthesis protein ribAB, chloroplast precursor, putative, expressed
Seita.1G184300	blue	yes	3185.16	0.848725	--	--	--	--	--	--
Seita.9G478300	blue	yes	3195.03	0.84867	AT5G06730.1	--	Peroxidase superfamily protein	LOC_Os03g13180.1	--	peroxidase precursor, putative, expressed
Seita.7G320800	blue	yes	3245.46	0.848663	AT5G03700.1	--	D-mannose binding lectin protein with Apple-like carbohydrate-binding domain	LOC_Os11g05240.1	--	PAN domain-containing protein At5g03700 precursor, putative, expressed
Seita.6G201100	blue	yes	3176.65	0.848519	AT1G21240.1	WAK3	wall associated kinase 3	LOC_Os08g39220.1	--	OsWAK75 - OsWAK receptor-like protein kinase, expressed
Seita.9G230200	blue	yes	3250.86	0.848322	AT5G60710.1	--	Zinc finger (C3HC4-type RING finger) family protein	LOC_Os03g04890.1	--	zinc finger family protein, putative, expressed
Seita.4G253300	blue	yes	3360.3	0.848304	AT5G43060.1	--	Granulin repeat cysteine protease family protein	LOC_Os04g57440.1	--	oryzain beta chain precursor, putative, expressed
Seita.8G230900	blue	yes	3101.97	0.848138	--	--	--	--	--	--
Seita.5G109800	blue	yes	3159.43	0.847709	AT1G79130.1	--	SAUR-like auxin-responsive protein family	LOC_Os01g06230.1	--	OsSAUR1 - Auxin-responsive SAUR gene family member, expressed
Seita.5G136200	blue	yes	3217.36	0.847582	AT4G26200.1	ACS7,ATACS7	1-amino-cyclopropane-1-carboxylate synthase 7	LOC_Os01g09700.1	--	aminotransferase, classes I and II, domain containing protein, expressed
Seita.5G053300	blue	yes	3154.29	0.847561	AT1G44970.1	--	Peroxidase superfamily protein	LOC_Os01g15810.1	--	peroxidase precursor, putative, expressed
Seita.3G171400	blue	yes	3208.52	0.847096	AT2G46150.1	--	Late embryogenesis abundant (LEA) hydroxyproline-rich glycoprotein family	LOC_Os05g45070.1	--	harpin-induced protein 1 domain containing protein, expressed
Seita.1G203700	blue	yes	3128.6	0.847067	AT4G40070.1	--	RING/U-box superfamily protein	LOC_Os02g36300.1	--	zinc finger, C3HC4 type domain containing protein, expressed
Seita.4G145800	blue	yes	3326.61	0.846895	AT5G52450.1	--	MATE efflux family protein	LOC_Os06g29844.1	--	MATE efflux family protein, putative, expressed
Seita.9G180800	blue	yes	3101.7	0.846797	AT2G20815.1	--	Family of unknown function (DUF566)	LOC_Os03g38480.1	--	expressed protein
Seita.2G256400	blue	yes	3102.76	0.846683	AT5G17540.1	--	HXXXD-type acyl-transferase family protein	LOC_Os05g22300.1	--	transferase family protein, putative, expressed
Seita.2G390100	blue	yes	3211.81	0.846637	AT2G35050.1	--	Protein kinase superfamily protein with octicosapeptide/Phox/Bem1p domain	LOC_Os03g28300.1	--	protein kinase domain containing protein, expressed
Seita.5G456900	blue	yes	3194.09	0.846526	AT1G76640.1	--	Calcium-binding EF-hand family protein	LOC_Os01g72550.1	--	OsCML19 - Calmodulin-related calcium sensor protein, expressed
Seita.2G315900	blue	yes	3126.37	0.846397	AT5G51460.2	ATTPPA	Haloacid dehalogenase-like hydrolase (HAD) superfamily protein	LOC_Os07g30160.1	--	trehalose phosphatase, putative, expressed
Seita.3G260100	blue	yes	3245.6	0.846372	AT5G19410.1	--	ABC-2 type transporter family protein	LOC_Os05g31910.1	--	white-brown complex homolog protein 16, putative, expressed
Seita.7G130900	blue	yes	3259.06	0.845893	AT5G48290.1	--	Heavy metal transport/detoxification superfamily protein	LOC_Os04g39010.1	--	heavy metal associated domain containing protein, expressed
Seita.7G110100	blue	yes	3061.05	0.84556	AT1G76690.1	ATOPR2,OPR2	12-oxophytodienoate reductase 2	LOC_Os02g35310.1	--	12-oxophytodienoate reductase, putative, expressed
Seita.5G463800	blue	yes	3194.78	0.845492	--	--	--	LOC_Os01g72900.1	--	abscisic stress-ripening, putative, expressed
Seita.5G142500	blue	yes	3337.44	0.845377	AT4G27480.1	--	Core-2/I-branching beta-1,6-N-acetylglucosaminyltransferase family protein	LOC_Os01g10440.1	--	xylosyltransferase, putative, expressed
Seita.7G236500	blue	yes	3282.53	0.845337	AT2G32210.1	--	--	--	--	--
Seita.8G012600	blue	yes	3096.36	0.845296	AT3G56400.1	ATWRKY70,WRKY70	WRKY DNA-binding protein 70	LOC_Os12g02450.1	--	WRKY64, expressed
Seita.3G067100	blue	yes	3337.55	0.845236	AT5G23960.1	ATTPS21,TPS21	terpene synthase 21	LOC_Os02g26014.1	--	terpene synthase, putative, expressed
Seita.2G260000	blue	yes	3174.82	0.845165	AT2G24430.2	ANAC038,ANAC039,NAC038	NAC domain containing protein 38	LOC_Os09g32260.1	--	no apical meristem protein, putative, expressed
Seita.5G150200	blue	yes	3080.42	0.845017	AT5G45910.1	--	GDSL-like Lipase/Acylhydrolase superfamily protein	LOC_Os01g11660.1	--	GDSL-like lipase/acylhydrolase, putative, expressed
Seita.9G503000	blue	yes	3028.36	0.844928	AT4G37680.2	HHP4	heptahelical protein 4	LOC_Os03g10300.1	--	haemolysin-III, putative, expressed
Seita.1G345900	blue	yes	3136.94	0.844748	AT2G29120.1	ATGLR2.7,GLR2.7	glutamate receptor 2.7	LOC_Os02g54640.1	--	glutamate receptor, putative, expressed
Seita.2G255700	blue	yes	3102.27	0.844744	AT1G21230.1	WAK5	wall associated kinase 5	LOC_Os09g29510.1	--	OsWAK80 - OsWAK receptor-like protein kinase, expressed
Seita.2G016600	blue	yes	3098.68	0.844733	AT4G40070.1	--	RING/U-box superfamily protein	LOC_Os06g34870.1	--	Zinc finger, C3HC4 type domain containing protein, expressed
Seita.5G336800	blue	yes	3010.12	0.844716	AT5G43650.1	BHLH92	basic helix-loop-helix (bHLH) DNA-binding superfamily protein	LOC_Os01g56690.1	--	helix-loop-helix DNA-binding domain containing protein, expressed
Seita.5G024100	blue	yes	3042.22	0.844587	AT2G41380.1	--	S-adenosyl-L-methionine-dependent methyltransferases superfamily protein	LOC_Os01g20206.1	--	methyltransferase, putative, expressed
Seita.5G230600	blue	yes	3337.46	0.844549	AT1G64300.2	--	Protein kinase family protein	LOC_Os01g43350.1	--	protein kinase family protein, putative, expressed
Seita.2G162800	blue	yes	3132.51	0.844315	AT4G12070.1	--	--	LOC_Os09g10950.1	--	expressed protein
Seita.3G115700	blue	yes	3484.84	0.844313	AT5G61390.1	--	Polynucleotidyl transferase, ribonuclease H-like superfamily protein	LOC_Os05g01200.1	--	exonuclease, putative, expressed
Seita.7G306500	blue	yes	3330.18	0.844138	AT5G18270.2	ANAC087	Arabidopsis NAC domain containing protein 87	LOC_Os12g03050.1	--	no apical meristem protein, putative, expressed
Seita.9G086800	blue	yes	3315.22	0.843685	AT3G02100.1	--	UDP-Glycosyltransferase superfamily protein	LOC_Os03g55030.1	--	UDP-glucoronosyl and UDP-glucosyl transferase domain containing protein, expressed
Seita.2G238300	blue	yes	3320.37	0.843631	AT5G42830.1	--	HXXXD-type acyl-transferase family protein	LOC_Os06g01350.1	--	transferase family protein, putative, expressed
Seita.5G233900	blue	yes	3314.48	0.84339	AT4G18170.1	ATWRKY28,WRKY28	WRKY DNA-binding protein 28	LOC_Os01g43650.1	--	WRKY11, expressed
Seita.2G195200	blue	yes	3202.46	0.843351	AT3G28210.1	PMZ,SAP12	zinc finger (AN1-like) family protein	LOC_Os09g21710.1	--	AN1-like zinc finger domain containing protein, expressed
Seita.5G208300	blue	yes	3437.27	0.843265	AT5G56960.1	--	basic helix-loop-helix (bHLH) DNA-binding family protein	LOC_Os01g39330.1	--	helix-loop-helix DNA-binding domain containing protein, expressed
Seita.3G368600	blue	yes	3329.61	0.843046	AT4G37370.1	CYP81D8	cytochrome P450, family 81, subfamily D, polypeptide 8	LOC_Os12g39310.1	--	cytochrome P450, putative, expressed
Seita.7G173200	blue	yes	3072.61	0.842867	AT1G65730.1	YSL7	YELLOW STRIPE like 7	LOC_Os04g44320.1	--	transposon protein, putative, unclassified, expressed
Seita.6G023100	blue	yes	3121.34	0.842815	AT3G26310.1	CYP71B35	cytochrome P450, family 71, subfamily B, polypeptide 35	LOC_Os04g10160.1	--	cytochrome P450, putative, expressed
Seita.3G315500	blue	yes	3090.86	0.842682	AT1G17020.1	ATSRG1,SRG1	senescence-related gene 1	LOC_Os03g63900.1	--	1-aminocyclopropane-1-carboxylate oxidase 2, putative, expressed
Seita.7G292000	blue	yes	3082.94	0.842496	--	--	--	LOC_Os12g06900.1	--	citrate-binding protein precursor, putative, expressed
Seita.5G066300	blue	yes	3279.37	0.842489	AT5G07000.1	ATST2B,ST2B	sulfotransferase 2B	LOC_Os04g44460.1	--	sulfotransferase domain containing protein, expressed
Seita.1G104900	blue	yes	3091.47	0.842479	AT5G43580.1	--	Serine protease inhibitor, potato inhibitor I-type family protein	LOC_Os02g03170.1	--	inhibitor I family protein, putative, expressed
Seita.2G255300	blue	yes	3184.26	0.842472	AT1G76520.1	--	Auxin efflux carrier family protein	LOC_Os09g31478.2	--	auxin efflux carrier component, putative, expressed
Seita.3G138400	blue	yes	3111.27	0.842215	AT1G78410.1	--	VQ motif-containing protein	LOC_Os01g46440.1	--	VQ domain containing protein, putative, expressed
Seita.5G375100	blue	yes	3371.58	0.842121	AT3G46080.1	--	C2H2-type zinc finger family protein	LOC_Os01g62190.1	--	ZOS1-15 - C2H2 zinc finger protein, expressed
Seita.5G353800	blue	yes	3583.86	0.84211	AT3G12250.2	BZIP45,TGA6	TGACG motif-binding factor 6	LOC_Os01g59350.1	--	transcription factor, putative, expressed
Seita.5G361900	blue	yes	3102.33	0.842063	AT4G11070.1	AtWRKY41,WRKY41	WRKY family transcription factor	LOC_Os01g60600.1	--	WRKY108, expressed
Seita.2G334000	blue	yes	3250.71	0.841731	AT5G36110.1	CYP716A1	cytochrome P450, family 716, subfamily A, polypeptide 1	LOC_Os07g33440.1	--	cytochrome P450, putative, expressed
Seita.2G269000	blue	yes	3240.62	0.841658	AT5G41120.1	--	Esterase/lipase/thioesterase family protein	LOC_Os09g33530.1	--	expressed protein
Seita.6G228100	blue	yes	3373.86	0.84164	AT5G61820.1	--	--	LOC_Os08g42590.1	--	mtN19, putative, expressed
Seita.7G120100	blue	yes	3115.42	0.841333	AT1G34580.1	--	Major facilitator superfamily protein	LOC_Os04g38010.1	--	transporter family protein, putative, expressed
Seita.9G346400	blue	yes	3228.79	0.84127	AT1G10360.1	ATGSTU18,GST29,GSTU18	glutathione S-transferase TAU 18	LOC_Os10g38590.1	--	glutathione S-transferase, N-terminal domain containing protein, expressed
Seita.2G090300	blue	yes	3092.01	0.841077	AT4G30110.1	ATHMA2,HMA2	heavy metal atpase 2	LOC_Os07g12900.1	--	cadmium/zinc-transporting ATPase, putative, expressed
Seita.5G421700	blue	yes	3120.84	0.840918	AT5G14420.2	RGLG2	RING domain ligase2	LOC_Os01g68060.1	--	copine, putative, expressed
Seita.8G166400	blue	yes	3078.49	0.840873	AT1G12740.2	CYP87A2	cytochrome P450, family 87, subfamily A, polypeptide 2	LOC_Os04g48200.1	--	cytochrome P450, putative, expressed
Seita.9G144000	blue	yes	3322.34	0.84078	AT4G37850.1	--	basic helix-loop-helix (bHLH) DNA-binding superfamily protein	LOC_Os03g46860.1	--	helix-loop-helix DNA-binding protein, putative, expressed
Seita.9G234600	blue	yes	3211.51	0.840496	AT4G13180.1	--	NAD(P)-binding Rossmann-fold superfamily protein	LOC_Os10g31780.1	--	oxidoreductase, short chain dehydrogenase/reductase family domain containing protein, expressed
Seita.7G218200	blue	yes	3077.23	0.840385	AT2G37740.1	ATZFP10,ZFP10	zinc-finger protein 10	LOC_Os04g50070.1	--	ZOS4-13 - C2H2 zinc finger protein, expressed
Seita.5G175400	blue	yes	3123.57	0.840314	AT1G08510.1	FATB	fatty acyl-ACP thioesterases B	LOC_Os01g31760.1	--	acyl-ACP thioesterase, putative, expressed
Seita.9G071700	blue	yes	3149.95	0.839961	AT1G15150.1	--	MATE efflux family protein	LOC_Os01g31980.1	--	MATE efflux family protein, putative, expressed
Seita.5G346200	blue	yes	3295.91	0.839865	--	--	--	LOC_Os01g58130.1	--	expressed protein
Seita.1G154200	blue	yes	3184.95	0.839759	AT4G31550.1	ATWRKY11,WRKY11	WRKY DNA-binding protein 11	LOC_Os04g21950.1	--	WRKY51, expressed
Seita.7G323700	blue	yes	3071.42	0.839733	AT2G27690.1	CYP94C1	cytochrome P450, family 94, subfamily C, polypeptide 1	LOC_Os11g05380.1	--	cytochrome P450, putative, expressed
Seita.1G276400	blue	yes	3415.82	0.839455	AT5G47060.1	--	Protein of unknown function (DUF581)	LOC_Os02g46190.1	--	DUF581 domain containing protein, expressed
Seita.5G294600	blue	yes	3058.55	0.839448	AT4G35310.1	ATCPK5,CPK5	calmodulin-domain protein kinase 5	LOC_Os02g58520.1	--	CAMK_CAMK_like.16 - CAMK includes calcium/calmodulin depedent protein kinases, expressed
Seita.1G218600	blue	yes	3374.18	0.839371	AT4G24730.4	--	Calcineurin-like metallo-phosphoesterase superfamily protein	LOC_Os02g38230.1	--	high affinity nitrate transporter, putative, expressed
Seita.6G046600	blue	yes	3148.08	0.839301	--	--	--	LOC_Os08g07690.1	--	expressed protein
Seita.1G370000	blue	yes	3353.48	0.839242	AT4G14465.1	AHL20	AT-hook motif nuclear-localized protein 20	LOC_Os02g57520.1	--	DNA binding protein, putative, expressed
Seita.8G107800	blue	yes	3042.72	0.839186	AT1G05800.1	DGL	alpha/beta-Hydrolases superfamily protein	LOC_Os11g19340.1	--	lipase, putative, expressed
Seita.6G174800	blue	yes	3264.19	0.839145	AT4G35160.1	--	O-methyltransferase family protein	LOC_Os06g13280.1	--	O-methyltransferase, putative, expressed
Seita.7G058900	blue	yes	3257.23	0.838905	AT5G41800.1	--	Transmembrane amino acid transporter family protein	LOC_Os05g50920.1	--	transmembrane amino acid transporter protein, putative, expressed
Seita.5G347100	blue	yes	3297.36	0.83882	AT5G11940.1	--	Subtilase family protein	LOC_Os01g58270.1	--	OsSub7 - Putative Subtilisin homologue, expressed
Seita.2G258300	blue	yes	3117.97	0.838631	AT1G34190.1	anac017,NAC017	NAC domain containing protein 17	LOC_Os09g32040.1	--	no apical meristem protein, putative, expressed
Seita.1G077000	blue	yes	3252.12	0.838524	--	--	--	--	--	--
Seita.5G058100	blue	yes	3080.13	0.838473	--	--	--	LOC_Os10g34770.1	--	RIPER4 - Ripening-related family protein precursor, putative, expressed
Seita.4G103100	blue	yes	3222.37	0.838398	AT1G70230.1	TBL27	TRICHOME BIREFRINGENCE-LIKE 27	LOC_Os07g15320.1	--	leaf senescence related protein, putative, expressed
Seita.1G186200	blue	yes	3189.4	0.838382	AT3G18710.1	ATPUB29,PUB29	plant U-box 29	LOC_Os02g33680.1	--	U-box domain containing protein, expressed
Seita.3G350400	blue	yes	3064.75	0.838244	AT5G55830.1	--	Concanavalin A-like lectin protein kinase family protein	LOC_Os02g48200.1	--	lectin-like protein kinase, putative, expressed
Seita.3G073300	blue	yes	3150.91	0.83798	AT4G18910.1	ATNLM2,NIP1;2,NLM2	NOD26-like intrinsic protein 1;2	LOC_Os05g11560.1	--	aquaporin protein, putative, expressed
Seita.3G076900	blue	yes	3170.63	0.837968	AT5G53190.1	--	Nodulin MtN3 family protein	LOC_Os05g12320.1	--	nodulin MtN3 family protein, putative, expressed
Seita.1G270500	blue	yes	3249.6	0.837921	AT5G19700.1	--	MATE efflux family protein	LOC_Os02g45380.1	--	MATE domain containing protein, expressed
Seita.3G138500	blue	yes	3213.11	0.83791	AT4G24130.1	--	Protein of unknown function, DUF538	LOC_Os01g46390.1	--	DUF538 domain containing protein, putative, expressed
Seita.9G231800	blue	yes	3078.72	0.837905	AT4G23660.1	AtPPT1,PPT1	polyprenyltransferase 1	LOC_Os08g23320.1	--	para-hydroxybenzoate--polyprenyltransferase, mitochondrial precursor, putative, expressed
Seita.3G071400	blue	yes	3187.89	0.837859	AT5G06860.1	ATPGIP1,PGIP1	polygalacturonase inhibiting protein 1	LOC_Os05g01380.1	--	polygalacturonase inhibitor precursor, putative, expressed
Seita.6G067600	blue	yes	3104.63	0.837606	AT2G20340.1	--	Pyridoxal phosphate (PLP)-dependent transferases superfamily protein	LOC_Os08g04540.1	--	decarboxylase, putative, expressed
Seita.2G317900	blue	yes	3009.59	0.83742	AT1G22360.1	AtUGT85A2,UGT85A2	UDP-glucosyl transferase 85A2	LOC_Os07g30469.1	--	indole-3-acetate beta-glucosyltransferase, putative, expressed
Seita.3G023800	blue	yes	3258.74	0.837355	AT1G56140.1	--	Leucine-rich repeat transmembrane protein kinase	LOC_Os04g56360.1	--	cysteine-rich receptor-like protein kinase 8 precursor, putative, expressed
Seita.5G080300	blue	yes	3142.14	0.837353	AT3G18180.1	--	Glycosyltransferase family 61 protein	LOC_Os01g02920.1	--	glycosyltransferase protein, putative, expressed
Seita.5G394600	blue	yes	3069.63	0.837301	AT5G67090.1	--	Subtilisin-like serine endopeptidase family protein	LOC_Os01g64850.1	--	OsSub10 - Putative Subtilisin homologue, expressed
Seita.4G235500	blue	yes	3040.88	0.837288	AT5G25900.1	ATKO1,CYP701A3,GA3	GA requiring 3	LOC_Os06g37364.2	--	cytochrome P450, putative, expressed
Seita.8G172400	blue	yes	3075.42	0.837003	--	--	--	--	--	--
Seita.3G158000	blue	yes	3254.27	0.83699	AT1G66840.1	--	Plant protein of unknown function (DUF827)	LOC_Os05g47680.1	--	expressed protein
Seita.6G003200	blue	yes	3045.69	0.836895	AT4G38470.1	--	ACT-like protein tyrosine kinase family protein	LOC_Os08g01270.1	--	protein kinase family protein, putative, expressed
Seita.9G292300	blue	yes	3272.65	0.83672	AT5G03970.1	--	F-box associated ubiquitination effector family protein	LOC_Os10g04700.1	--	OsFBX361 - F-box domain containing protein, expressed
Seita.3G171500	blue	yes	3070.93	0.836321	AT3G61550.1	--	RING/U-box superfamily protein	LOC_Os05g45060.1	--	RING-H2 finger protein ATL2M, putative, expressed
Seita.3G235700	blue	yes	3362.93	0.836269	AT5G09330.2	anac082,NAC082,VNI1	NAC domain containing protein 82	LOC_Os05g35170.1	--	no apical meristem protein, putative, expressed
Seita.4G089200	blue	yes	3057.6	0.836132	AT5G65290.1	--	LMBR1-like membrane protein	LOC_Os06g11520.1	--	LMBR1 integral membrane protein, putative, expressed
Seita.9G346200	blue	yes	3243.44	0.836076	AT1G10370.1	ATGSTU17,ERD9,GST30,GST30B	Glutathione S-transferase family protein	LOC_Os10g38340.1	--	glutathione S-transferase GSTU6, putative, expressed
Seita.9G020900	blue	yes	3137.7	0.83598	AT3G02875.1	ILR1	Peptidase M20/M25/M40 family protein	LOC_Os03g62060.1	--	hydrolase, putative, expressed
Seita.9G299900	blue	yes	3059.37	0.835746	AT4G23310.1	CRK23	cysteine-rich RLK (RECEPTOR-like protein kinase) 23	LOC_Os10g04730.1	--	TKL_IRAK_DUF26-la.6 - DUF26 kinases have homology to DUF26 containing loci, expressed
Seita.2G407200	blue	yes	3058.34	0.835696	AT1G14540.1	--	Peroxidase superfamily protein	LOC_Os07g44499.1	--	peroxidase, putative, expressed
Seita.5G346700	blue	yes	3075.41	0.835651	AT1G32960.1	ATSBT3.3,SBT3.3	Subtilase family protein	LOC_Os01g58240.1	--	OsSub6 - Putative Subtilisin homologue, expressed
Seita.2G419200	blue	yes	3152.01	0.835544	AT2G38760.1	ANN3,ANNAT3	annexin 3	LOC_Os05g31760.1	--	annexin, putative, expressed
Seita.9G497800	blue	yes	3173.72	0.835282	AT1G49850.1	--	RING/U-box superfamily protein	LOC_Os03g10890.1	--	zinc finger, C3HC4 type domain containing protein, expressed
Seita.3G155000	blue	yes	3494.39	0.835247	AT3G03280.1	--	--	LOC_Os05g47960.1	--	expressed protein
Seita.9G113500	blue	yes	3218.44	0.83521	AT2G41970.1	--	Protein kinase superfamily protein	LOC_Os03g51040.1	--	STRUBBELIG-RECEPTOR FAMILY 6 precursor, putative, expressed
Seita.5G391300	blue	yes	3245.44	0.835193	AT3G11280.1	--	Duplicated homeodomain-like superfamily protein	LOC_Os01g64360.1	--	MYB family transcription factor, putative, expressed
Seita.7G112000	blue	yes	3052.75	0.835038	AT2G29060.1	--	GRAS family transcription factor	LOC_Os11g47890.1	--	GRAS family transcription factor domain containing protein, expressed
Seita.2G357800	blue	yes	3223.33	0.835023	AT5G12480.1	CPK7	calmodulin-domain protein kinase 7	LOC_Os07g38120.1	--	CAMK_CAMK_like.34 - CAMK includes calcium/calmodulin depedent protein kinases, expressed
Seita.5G284300	blue	yes	3287.99	0.834922	AT4G26890.1	MAPKKK16	mitogen-activated protein kinase kinase kinase 16	LOC_Os01g50400.1	--	STE_MEKK_ste11_MAP3K.5 - STE kinases include homologs to sterile 7, sterile 11 and sterile 20 from yeast, expressed
Seita.2G293500	blue	yes	3382.33	0.834691	AT5G11880.1	--	Pyridoxal-dependent decarboxylase family protein	LOC_Os09g37120.1	--	pyridoxal-dependent decarboxylase protein, putative, expressed
Seita.9G101800	blue	yes	3132.69	0.834642	AT1G69870.1	NRT1.7	nitrate transporter 1.7	LOC_Os04g56560.1	--	proton-dependent oligopeptide transport, putative, expressed
Seita.3G262600	blue	yes	3370.93	0.834589	AT1G58370.1	ATXYN1,RXF12	glycosyl hydrolase family 10 protein / carbohydrate-binding domain-containing protein	LOC_Os01g04300.1	--	glycosyl hydrolase family 10 protein, putative, expressed
Seita.7G204900	blue	yes	3143.3	0.833865	AT4G23030.1	--	MATE efflux family protein	LOC_Os04g48290.1	--	MATE efflux family protein, putative, expressed
Seita.9G424500	blue	yes	2977.72	0.833845	AT2G03200.1	--	Eukaryotic aspartyl protease family protein	LOC_Os03g20290.1	--	aspartic proteinase nepenthesin-1 precursor, putative, expressed
Seita.8G089300	blue	yes	3038.06	0.833724	AT1G11330.2	--	S-locus lectin protein kinase family protein	LOC_Os11g11780.1	--	cysteine-rich receptor-like protein kinase 21 precursor, putative, expressed
Seita.3G036300	blue	yes	3222.1	0.833582	AT3G05500.1	--	Rubber elongation factor protein (REF)	LOC_Os05g05940.1	--	stress-related protein, putative, expressed
Seita.2G404400	blue	yes	3346.59	0.833357	AT2G46950.1	CYP709B2	cytochrome P450, family 709, subfamily B, polypeptide 2	LOC_Os07g23570.1	--	cytochrome P450 72A1, putative, expressed
Seita.9G444100	blue	yes	3021.73	0.832937	AT3G45640.1	ATMAPK3,ATMPK3,MPK3	mitogen-activated protein kinase 3	LOC_Os03g17700.1	--	CGMC_MAPKCGMC_2_ERK.2 - CGMC includes CDA, MAPK, GSK3, and CLKC kinases, expressed
Seita.5G466500	blue	yes	3054.86	0.83283	AT3G19430.1	--	late embryogenesis abundant protein-related / LEA protein-related	LOC_Os01g73700.1	--	RCLEA2 - Root cap and Late embryogenesis related family protein precursor, putative, expressed
Seita.7G116700	blue	yes	3098.26	0.832801	AT2G03220.1	ATFT1,ATFUT1,FT1,MUR2	fucosyltransferase 1	LOC_Os04g37640.1	--	xyloglucan fucosyltransferase, putative, expressed
Seita.9G499900	blue	yes	3270.93	0.832435	AT4G37640.1	ACA2	calcium ATPase 2	LOC_Os03g10640.1	--	calcium-transporting ATPase, plasma membrane-type, putative, expressed
Seita.6G214100	blue	yes	3023.15	0.832256	AT5G57240.2	ORP4C	OSBP(oxysterol binding protein)-related protein 4C	LOC_Os08g40590.2	--	oxysterol-binding protein, putative, expressed
Seita.1G056300	blue	yes	3190.67	0.832029	AT2G04570.1	--	GDSL-like Lipase/Acylhydrolase superfamily protein	LOC_Os02g09610.1	--	GDSL-like lipase/acylhydrolase, putative, expressed
Seita.9G186800	blue	yes	3350.07	0.831865	AT4G19570.1	--	Chaperone DnaJ-domain superfamily protein	LOC_Os03g36160.1	--	DNAJ heat shock N-terminal domain-containing protein, putative, expressed
Seita.9G396600	blue	yes	3507.34	0.831782	AT2G48030.1	--	DNAse I-like superfamily protein	LOC_Os03g24610.1	--	endonuclease/exonuclease/phosphatase family domain containing protein, expressed
Seita.2G109300	blue	yes	3014.82	0.831729	AT4G21380.1	ARK3,RK3	receptor kinase 3	LOC_Os04g54070.1	--	receptor-like kinase, putative, expressed
Seita.3G408000	blue	yes	3159.48	0.831548	AT3G52080.1	chx28	cation/hydrogen exchanger 28	LOC_Os12g44300.1	--	CHX28, putative, expressed
Seita.6G187100	blue	yes	3533.61	0.831192	AT1G72230.1	--	Cupredoxin superfamily protein	LOC_Os08g37670.1	--	plastocyanin-like domain containing protein, putative, expressed
Seita.2G138200	blue	yes	3250.65	0.831069	AT5G43410.1	--	Integrase-type DNA-binding superfamily protein	LOC_Os09g39810.1	--	AP2 domain containing protein, expressed
Seita.5G234900	blue	yes	3315.7	0.830878	AT3G14690.1	CYP72A15	cytochrome P450, family 72, subfamily A, polypeptide 15	LOC_Os01g43774.1	--	cytochrome P450 72A1, putative, expressed
Seita.5G218000	blue	yes	3292.54	0.83084	AT3G50930.1	BCS1	cytochrome BC1 synthesis	LOC_Os01g42030.1	--	mitochondrial chaperone BCS1, putative, expressed
Seita.1G345400	blue	yes	3045.13	0.830808	AT1G51660.1	ATMEK4,ATMKK4,MKK4	mitogen-activated protein kinase kinase 4	LOC_Os02g54600.1	--	STE_MEK_ste7_MAP2K.5 - STE kinases include homologs to sterile 7, sterile 11 and sterile 20 from yeast, expressed
Seita.5G392600	blue	yes	3289.39	0.830708	AT2G22590.1	--	UDP-Glycosyltransferase superfamily protein	LOC_Os01g64540.1	--	anthocyanidin 3-O-glucosyltransferase, putative, expressed
Seita.1G345100	blue	yes	3230.8	0.830548	AT4G25780.1	--	CAP (Cysteine-rich secretory proteins, Antigen 5, and Pathogenesis-related 1 protein) superfamily protein	LOC_Os02g54570.1	--	SCP-like extracellular protein, expressed
Seita.6G206700	blue	yes	3195.49	0.830465	AT1G21270.1	WAK2	wall-associated kinase 2	LOC_Os08g39210.1	--	OsWAK74 - OsWAK receptor-like protein kinase, expressed
Seita.9G211700	blue	yes	3048.67	0.830257	--	--	--	LOC_Os10g34770.1	--	RIPER4 - Ripening-related family protein precursor, putative, expressed
Seita.5G377300	blue	yes	2995.72	0.829858	AT3G55470.2	--	Calcium-dependent lipid-binding (CaLB domain) family protein	LOC_Os01g62430.3	--	C2 domain containing protein, putative, expressed
Seita.9G396700	blue	yes	3061.94	0.829814	AT3G27890.1	NQR	NADPH:quinone oxidoreductase	LOC_Os01g72430.1	--	NADPH quinone oxidoreductase, putative, expressed
Seita.8G099900	blue	yes	3121.29	0.829693	--	--	--	--	--	--
Seita.3G373500	blue	yes	3201.53	0.829583	AT3G18950.1	--	Transducin/WD40 repeat-like superfamily protein	LOC_Os12g40260.1	--	WD-40 repeat family protein, putative, expressed
Seita.6G055600	blue	yes	3059.01	0.828717	AT1G01030.1	NGA3	AP2/B3-like transcriptional factor family protein	LOC_Os08g06120.1	--	B3 DNA binding domain containing protein, expressed
Seita.8G176000	blue	yes	3035.28	0.828489	AT5G39670.1	--	Calcium-binding EF-hand family protein	LOC_Os11g38780.1	--	EF hand family protein, putative
Seita.4G091600	blue	yes	3060.2	0.828444	AT1G34670.1	AtMYB93,MYB93	myb domain protein 93	LOC_Os06g11780.1	--	MYB family transcription factor, putative, expressed
Seita.5G046300	blue	yes	3243.11	0.8284	AT5G26710.1	--	Glutamyl/glutaminyl-tRNA synthetase, class Ic	LOC_Os01g16520.1	--	glutamyl-tRNA synthetase, cytoplasmic, putative, expressed
Seita.3G087200	blue	yes	3009.39	0.828196	AT5G17210.1	--	Protein of unknown function (DUF1218)	LOC_Os12g13900.1	--	expressed protein
Seita.3G276300	blue	yes	3198.06	0.828006	AT2G19130.1	--	S-locus lectin protein kinase family protein	LOC_Os11g03820.1	--	D-mannose binding lectin family protein, expressed
Seita.7G190900	blue	yes	3116.21	0.827633	AT3G12750.1	ZIP1	zinc transporter 1 precursor	LOC_Os05g39540.1	--	metal cation transporter, putative, expressed
Seita.4G106300	blue	yes	3059.05	0.827544	AT1G70170.1	MMP	matrix metalloproteinase	LOC_Os06g13180.1	--	metalloendoproteinase 1 precursor, putative, expressed
Seita.2G177200	blue	yes	3261.25	0.827493	--	--	--	LOC_Os09g15550.1	--	OsFBX313 - F-box domain containing protein, expressed
Seita.6G139200	blue	yes	3052.66	0.827393	AT3G26760.1	--	NAD(P)-binding Rossmann-fold superfamily protein	LOC_Os07g46830.1	--	sex determination protein tasselseed-2, putative, expressed
Seita.1G087900	blue	yes	3304.42	0.827194	AT4G37790.1	HAT22	Homeobox-leucine zipper protein family	LOC_Os02g05640.1	--	homeobox associated leucine zipper, putative, expressed
Seita.3G048600	blue	yes	3424.24	0.827115	AT3G55950.1	ATCRR3,CCR3	CRINKLY4 related 3	LOC_Os05g03620.1	--	TKL_IRAK_CR4L.4 - The CR4L subfamily has homology with Crinkly4, expressed
Seita.2G145800	blue	yes	3017.75	0.827093	AT3G26300.1	CYP71B34	cytochrome P450, family 71, subfamily B, polypeptide 34	LOC_Os04g10160.1	--	cytochrome P450, putative, expressed
Seita.8G024400	blue	yes	3060.89	0.827061	--	--	--	--	--	--
Seita.3G285900	blue	yes	3150.59	0.826797	AT3G48980.1	--	Arabidopsis thaliana protein of unknown function (DUF821)	LOC_Os08g01150.1	--	DTA2, putative, expressed
Seita.6G029300	blue	yes	3414.96	0.826726	AT2G32210.1	--	--	LOC_Os08g10500.1	--	expressed protein
Seita.5G247200	blue	yes	3210.05	0.826671	AT4G19460.1	--	UDP-Glycosyltransferase superfamily protein	LOC_Os01g46430.1	--	glycosyl transferase, group 1 domain containing protein, expressed
Seita.1G151900	blue	yes	3449.34	0.826562	AT5G23960.1	ATTPS21,TPS21	terpene synthase 21	LOC_Os02g26014.1	--	terpene synthase, putative, expressed
Seita.6G173400	blue	yes	3299.3	0.826319	AT2G06040.1	--	--	LOC_Os08g35700.1	--	Leucine Rich Repeat family protein, expressed
Seita.5G223400	blue	yes	2985.95	0.826314	AT5G20030.1	--	Plant Tudor-like RNA-binding protein	LOC_Os01g42540.1	--	ENT domain containing protein, expressed
Seita.9G346600	blue	yes	3139.45	0.826272	AT1G10370.1	ATGSTU17,ERD9,GST30,GST30B	Glutathione S-transferase family protein	LOC_Os10g38489.1	--	glutathione S-transferase GSTU6, putative, expressed
Seita.9G560200	blue	yes	3001.71	0.826205	AT2G40095.1	--	Alpha/beta hydrolase related protein	LOC_Os03g03200.2	--	hydrolase, alpha/beta fold family protein, putative, expressed
Seita.5G080700	blue	yes	3231.16	0.826201	AT3G18180.1	--	Glycosyltransferase family 61 protein	LOC_Os01g02930.1	--	glycosyltransferase protein, putative, expressed
Seita.9G221000	blue	yes	3138.93	0.826088	AT3G17380.1	--	TRAF-like family protein	LOC_Os10g33830.1	--	MATH domain containing protein, expressed
Seita.9G519100	blue	yes	3305.6	0.825923	AT2G05940.1	--	Protein kinase superfamily protein	LOC_Os03g08170.1	--	protein kinase APK1B, chloroplast precursor, putative, expressed
Seita.5G118900	blue	yes	3049.21	0.825837	AT5G26660.1	ATMYB86,MYB86	myb domain protein 86	LOC_Os01g36460.1	--	MYB family transcription factor, putative, expressed
Seita.5G450000	blue	yes	3024.85	0.825674	AT4G16260.1	--	Glycosyl hydrolase superfamily protein	LOC_Os01g71820.1	--	glycosyl hydrolases family 17, putative, expressed
Seita.4G282900	blue	yes	3433.47	0.825589	AT4G35900.1	atbzip14,FD,FD-1	Basic-leucine zipper (bZIP) transcription factor family protein	LOC_Os06g50830.1	--	bZIP transcription factor domain containing protein, expressed
Seita.5G091300	blue	yes	3138.52	0.825511	AT1G68390.1	--	Core-2/I-branching beta-1,6-N-acetylglucosaminyltransferase family protein	LOC_Os10g08280.1	--	DNA binding protein, putative, expressed
Seita.1G206000	blue	yes	3382.53	0.825371	--	--	--	LOC_Os02g36530.1	--	expressed protein
Seita.8G212400	blue	yes	3196.09	0.825336	AT5G01050.1	--	Laccase/Diphenol oxidase family protein	LOC_Os10g20610.1	--	laccase-15 precursor, putative, expressed
Seita.2G213800	blue	yes	3456.5	0.825199	AT4G25835.1	--	P-loop containing nucleoside triphosphate hydrolases superfamily protein	LOC_Os09g26260.1	--	AAA-type ATPase family protein, putative, expressed
Seita.5G440700	blue	yes	3334.2	0.825121	AT3G14260.1	--	Protein of unknown function (DUF567)	LOC_Os01g70590.1	--	DUF567 domain containing protein, putative, expressed
Seita.2G441300	blue	yes	3014.81	0.824957	AT4G16120.1	ATSEB1,COBL7,SEB1	COBRA-like protein-7 precursor	LOC_Os07g49080.1	--	COBRA-like protein 7 precursor, putative, expressed
Seita.1G086700	blue	yes	3021.06	0.824889	AT5G38430.1	--	Ribulose bisphosphate carboxylase (small chain) family protein	LOC_Os02g05830.1	--	ribulose bisphosphate carboxylase small chain, chloroplast precursor, putative, expressed
Seita.8G112800	blue	yes	3023.69	0.824853	AT1G79620.1	--	Leucine-rich repeat protein kinase family protein	LOC_Os11g26140.1	--	cysteine-rich receptor-like protein kinase 4 precursor, putative, expressed
Seita.9G206800	blue	yes	3009.04	0.824679	AT1G15130.1	--	Endosomal targeting BRO1-like domain-containing protein	LOC_Os10g35250.1	--	vacuolar protein-sorting protein bro1, putative, expressed
Seita.8G215900	blue	yes	3035.54	0.824408	AT4G15630.1	--	Uncharacterised protein family (UPF0497)	LOC_Os11g42950.1	--	expressed protein
Seita.9G380100	blue	yes	3070.63	0.824175	AT5G64220.2	--	Calmodulin-binding transcription activator protein with CG-1 and Ankyrin domains	LOC_Os07g43030.1	--	calmodulin-binding transcription activator, putative, expressed
Seita.1G131200	blue	yes	3171.75	0.823903	AT5G52450.1	--	MATE efflux family protein	LOC_Os10g11354.1	--	MATE efflux family protein, putative, expressed
Seita.1G289700	blue	yes	3024.21	0.823849	AT1G27910.1	ATPUB45,PUB45	plant U-box 45	LOC_Os02g47670.2	--	bg55, putative, expressed
Seita.3G326900	blue	yes	3332.86	0.823786	--	--	--	LOC_Os12g38270.1	--	metallothionein, putative, expressed
Seita.9G285800	blue	yes	3137.38	0.823748	--	--	--	LOC_Os10g06680.1	--	expressed protein
Seita.3G007800	blue	yes	3171.37	0.823701	--	--	--	LOC_Os04g58890.1	--	expressed protein
Seita.7G119200	blue	yes	3121.22	0.823638	--	--	--	LOC_Os04g37880.1	--	expressed protein
Seita.9G294200	blue	yes	3023.41	0.823358	AT5G17210.1	--	Protein of unknown function (DUF1218)	LOC_Os05g35930.1	--	expressed protein
Seita.9G264000	blue	yes	3264.91	0.822939	AT3G22910.1	--	ATPase E1-E2 type family protein / haloacid dehalogenase-like hydrolase family protein	LOC_Os10g28240.1	--	calcium-transporting ATPase, plasma membrane-type, putative, expressed
Seita.5G054600	blue	yes	3268.83	0.822775	AT1G65910.1	anac028,NAC028	NAC domain containing protein 28	LOC_Os01g15640.1	--	no apical meristem protein, putative, expressed
Seita.9G550600	blue	yes	3062.64	0.822722	AT1G20560.1	AAE1	acyl activating enzyme 1	LOC_Os03g04120.1	--	AMP-binding enzyme, putative, expressed
Seita.9G143900	blue	yes	3344.01	0.822625	AT4G37850.1	--	basic helix-loop-helix (bHLH) DNA-binding superfamily protein	LOC_Os03g46860.1	--	helix-loop-helix DNA-binding protein, putative, expressed
Seita.1G152000	blue	yes	3491.28	0.822429	AT5G23960.1	ATTPS21,TPS21	terpene synthase 21	LOC_Os01g23530.1	--	terpene synthase, putative, expressed
Seita.5G389800	blue	yes	3326.8	0.822405	AT5G24090.1	ATCHIA,CHIA	chitinase A	LOC_Os01g64100.1	--	glycosyl hydrolase, putative, expressed
Seita.7G199600	blue	yes	3147.63	0.822317	AT2G17220.1	--	Protein kinase superfamily protein	LOC_Os04g47620.1	--	protein kinase APK1B, chloroplast precursor, putative, expressed
Seita.2G199800	blue	yes	3020.18	0.822194	AT1G66230.1	AtMYB20,MYB20	myb domain protein 20	LOC_Os09g23620.1	--	MYB family transcription factor, putative, expressed
Seita.3G146500	blue	yes	3078.92	0.822128	AT1G28480.1	GRX480,roxy19	Thioredoxin superfamily protein	LOC_Os01g47760.1	--	OsGrx_I1 - glutaredoxin subgroup III, expressed
Seita.6G139300	blue	yes	3003.38	0.822103	AT4G03140.1	--	NAD(P)-binding Rossmann-fold superfamily protein	LOC_Os07g46830.1	--	sex determination protein tasselseed-2, putative, expressed
Seita.1G196900	blue	yes	3138.47	0.821843	AT4G15760.1	MO1	monooxygenase 1	LOC_Os02g27200.1	--	expressed protein
Seita.2G394900	blue	yes	3151.97	0.82184	AT1G22380.1	AtUGT85A3,UGT85A3	UDP-glucosyl transferase 85A3	LOC_Os07g42970.1	--	UDP-glucoronosyl and UDP-glucosyl transferase domain containing protein, expressed
Seita.5G242600	blue	yes	3102.4	0.821795	--	--	--	LOC_Os01g45720.1	--	expressed protein
Seita.8G081800	blue	yes	2986.67	0.821666	AT1G07160.1	--	Protein phosphatase 2C family protein	LOC_Os11g13820.1	--	protein phosphatase 2C, putative, expressed
Seita.9G318500	blue	yes	3274.2	0.82123	AT2G44730.1	--	Alcohol dehydrogenase transcription factor Myb/SANT-like family protein	LOC_Os10g41460.1	--	transcription factor like protein, putative, expressed
Seita.2G213200	blue	yes	3367.62	0.821185	AT5G57620.1	AtMYB36,MYB36	myb domain protein 36	LOC_Os09g26170.1	--	MYB family transcription factor, putative, expressed
Seita.9G086200	blue	yes	3144.8	0.821095	AT3G02100.1	--	UDP-Glycosyltransferase superfamily protein	LOC_Os03g55040.1	--	UDP-glucoronosyl and UDP-glucosyl transferase domain containing protein, expressed
Seita.6G167900	blue	yes	3085.21	0.821002	AT3G21240.1	4CL2,AT4CL2	4-coumarate:CoA ligase 2	LOC_Os08g34790.1	--	AMP-binding domain containing protein, expressed
Seita.7G283000	blue	yes	3065.03	0.820989	AT1G77280.1	--	Protein kinase protein with adenine nucleotide alpha hydrolases-like domain	LOC_Os12g07990.1	--	protein kinase family protein, putative, expressed
Seita.6G149800	blue	yes	3219.49	0.820883	AT1G19250.1	FMO1	flavin-dependent monooxygenase 1	LOC_Os06g10170.1	--	flavin-containing monooxygenase family protein, putative, expressed
Seita.5G284400	blue	yes	3088.77	0.82086	AT4G26890.1	MAPKKK16	mitogen-activated protein kinase kinase kinase 16	LOC_Os01g50410.1	--	STE_MEKK_ste11_MAP3K.6 - STE kinases include homologs to sterile 7, sterile 11 and sterile 20 from yeast, expressed
Seita.5G124800	blue	yes	3180.19	0.820616	AT1G52780.1	--	Protein of unknown function (DUF2921)	LOC_Os01g08170.1	--	expressed protein
Seita.8G120200	blue	yes	3010.01	0.820578	--	--	--	LOC_Os11g29210.1	--	resistance-gene-interacting protein, putative, expressed
Seita.3G055300	blue	yes	3328.19	0.820522	AT1G02360.1	--	Chitinase family protein	LOC_Os05g04690.1	--	CHIT11 - Chitinase family protein precursor, expressed
Seita.5G030300	blue	yes	3118.05	0.820508	AT1G71695.1	--	Peroxidase superfamily protein	LOC_Os05g04470.1	--	peroxidase precursor, putative, expressed
Seita.9G122600	blue	yes	3438.42	0.820505	AT2G01490.1	--	phytanoyl-CoA dioxygenase (PhyH) family protein	LOC_Os03g50040.1	--	phytanoyl-CoA dioxygenase, putative, expressed
Seita.2G280100	blue	yes	3217.86	0.820203	AT5G51990.1	CBF4,DREB1D	C-repeat-binding factor 4	LOC_Os09g35030.1	--	dehydration-responsive element-binding protein, putative, expressed
Seita.4G178300	blue	yes	3037.89	0.820087	AT4G20820.1	--	FAD-binding Berberine family protein	LOC_Os06g35630.1	--	reticuline oxidase-like protein precursor, putative, expressed
Seita.9G252300	blue	yes	3016.91	0.820065	AT5G20900.1	JAZ12,TIFY3B	jasmonate-zim-domain protein 12	LOC_Os03g28940.1	--	ZIM domain containing protein, putative, expressed
Seita.9G128800	blue	yes	3133.95	0.819606	AT3G08990.1	--	Yippee family putative zinc-binding protein	LOC_Os03g49150.1	--	yippee zinc-binding protein, putative, expressed
Seita.4G263400	blue	yes	3087.82	0.819558	AT1G56010.2	anac021,ANAC022,NAC1	NAC domain containing protein 1	LOC_Os06g46270.1	--	no apical meristem protein, putative, expressed
Seita.4G284200	blue	yes	3160.84	0.819294	AT3G07040.1	RPM1,RPS3	NB-ARC domain-containing disease resistance protein	LOC_Os01g70080.1	--	NB-ARC domain containing protein, expressed
Seita.2G102600	blue	yes	3428.8	0.81919	AT5G49690.1	--	UDP-Glycosyltransferase superfamily protein	LOC_Os07g10190.1	--	glucosyltransferase, putative, expressed
Seita.2G010500	blue	yes	3034.62	0.81916	AT5G48930.1	HCT	hydroxycinnamoyl-CoA shikimate/quinate hydroxycinnamoyl transferase	LOC_Os04g56910.1	--	transferase family protein, putative, expressed
Seita.6G241000	blue	yes	3150.07	0.818791	AT4G35840.1	--	RING/U-box superfamily protein	LOC_Os08g43670.1	--	RING-H2 finger protein ATL2B, putative, expressed
Seita.2G298200	blue	yes	3187.46	0.818757	AT4G38380.1	--	MATE efflux family protein	LOC_Os09g37610.1	--	MATE efflux protein, putative, expressed
Seita.3G220600	blue	yes	3619.57	0.818486	AT5G54680.1	bHLH105,ILR3	basic helix-loop-helix (bHLH) DNA-binding superfamily protein	LOC_Os05g38140.1	--	basic helix-loop-helix DND-binding domain containing protein, expressed
Seita.9G347500	blue	yes	3309.69	0.818425	AT2G45510.1	CYP704A2	cytochrome P450, family 704, subfamily A, polypeptide 2	LOC_Os10g38110.1	--	cytochrome P450, putative, expressed
Seita.2G392500	blue	yes	3099.82	0.817935	AT2G15760.1	--	Protein of unknown function (DUF1645)	LOC_Os07g42740.1	--	DUF1645 domain containing protein, putative, expressed
Seita.5G459500	blue	yes	3094.06	0.817857	AT1G78830.1	--	Curculin-like (mannose-binding) lectin family protein	LOC_Os01g72810.1	--	secreted glycoprotein, putative, expressed
Seita.9G559600	blue	yes	3107.54	0.817837	--	--	--	LOC_Os03g03334.1	--	expressed protein
Seita.2G117900	blue	yes	3142.32	0.81733	AT1G71950.1	--	Proteinase inhibitor, propeptide	LOC_Os07g25690.1	--	subtilisin N-terminal Region family protein, expressed
Seita.5G192000	blue	yes	3312.47	0.817307	AT2G45130.1	ATSPX3,SPX3	SPX domain gene 3	LOC_Os03g29250.1	--	SPX domain-containing protein, putative, expressed
Seita.6G037400	blue	yes	3098.31	0.817272	AT4G14630.1	GLP9	germin-like protein 9	LOC_Os12g05860.1	--	Cupin domain containing protein, expressed
Seita.3G162200	blue	yes	3032.98	0.816969	AT5G20100.1	--	--	LOC_Os05g46500.1	--	expressed protein
Seita.1G104600	blue	yes	2999.98	0.816838	--	--	--	LOC_Os02g03140.1	--	inhibitor I family protein, putative, expressed
Seita.7G306400	blue	yes	3178.6	0.816071	AT1G69490.1	ANAC029,ATNAP,NAP	NAC-like, activated by AP3/PI	LOC_Os11g03300.1	--	NAC domain transcription factor, putative, expressed
Seita.7G276100	blue	yes	3465.88	0.81599	AT4G02370.1	--	Protein of unknown function, DUF538	LOC_Os12g09620.1	--	expressed protein
Seita.7G037900	blue	yes	2975.59	0.815875	--	--	--	LOC_Os04g12720.1	--	indole-3-acetate beta-glucosyltransferase, putative, expressed
Seita.5G283600	blue	yes	3073.16	0.815865	AT2G47000.1	ABCB4,ATPGP4,MDR4,PGP4	ATP binding cassette subfamily B4	LOC_Os01g50160.1	--	MDR-like ABC transporter, putative, expressed
Seita.8G129100	blue	yes	3263.6	0.815798	AT5G47910.1	ATRBOHD,RBOHD	respiratory burst oxidase homologue D	LOC_Os11g33120.1	--	respiratory burst oxidase, putative, expressed
Seita.9G251600	blue	yes	2937.54	0.815616	AT3G43440.1	JAZ11,TIFY3A	jasmonate-zim-domain protein 11	LOC_Os10g25230.1	--	ZIM domain containing protein, putative, expressed
Seita.9G317700	blue	yes	3038.47	0.814902	AT1G02170.1	AMC1,ATMC1,ATMCPB1,LOL3,MCP1B	metacaspase 1	LOC_Os03g27210.1	--	LOL3, putative, expressed
Seita.2G219500	blue	yes	3221.24	0.814357	AT5G07990.1	CYP75B1,D501,TT7	Cytochrome P450 superfamily protein	LOC_Os09g26960.1	--	cytochrome P450, putative, expressed
Seita.9G296300	blue	yes	3034.98	0.814324	AT3G02100.1	--	UDP-Glycosyltransferase superfamily protein	LOC_Os10g18510.1	--	UDP-glucoronosyl and UDP-glucosyl transferase domain containing protein, expressed
Seita.J027400	blue	yes	3062.66	0.814199	AT5G15890.1	TBL21	TRICHOME BIREFRINGENCE-LIKE 21	LOC_Os02g49650.1	--	leaf senescence related protein, putative, expressed
Seita.5G088000	blue	yes	3092.3	0.813884	AT3G02550.1	LBD41	LOB domain-containing protein 41	LOC_Os01g03890.1	--	DUF260 domain containing protein, putative, expressed
Seita.2G424600	blue	yes	3139.17	0.813878	AT3G26330.1	CYP71B37	cytochrome P450, family 71, subfamily B, polypeptide 37	LOC_Os01g27890.1	--	cytochrome P450, putative, expressed
Seita.3G254000	blue	yes	3148.34	0.813869	AT3G05990.1	--	Leucine-rich repeat (LRR) family protein	LOC_Os05g32660.1	--	leucine-rich repeat family protein, putative, expressed
Seita.1G174100	blue	yes	3169.71	0.813669	AT5G61890.1	--	Integrase-type DNA-binding superfamily protein	LOC_Os04g32620.1	--	ethylene-responsive transcription factor ERF114, putative, expressed
Seita.5G319000	blue	yes	2966.06	0.813622	AT1G29280.1	ATWRKY65,WRKY65	WRKY DNA-binding protein 65	LOC_Os01g54600.1	--	WRKY13, expressed
Seita.5G150800	blue	yes	3126.37	0.813556	AT5G45910.1	--	GDSL-like Lipase/Acylhydrolase superfamily protein	LOC_Os01g11750.1	--	GDSL-like lipase/acylhydrolase, putative, expressed
Seita.1G132500	blue	yes	2982.08	0.813319	AT3G48280.1	CYP71A25	cytochrome P450, family 71, subfamily A, polypeptide 25	LOC_Os08g01510.1	--	cytochrome P450, putative, expressed
Seita.7G049900	blue	yes	3140.65	0.813199	AT4G39330.1	ATCAD9,CAD9	cinnamyl alcohol dehydrogenase 9	LOC_Os04g15920.1	--	dehydrogenase, putative, expressed
Seita.7G120000	blue	yes	2995.33	0.813104	AT1G34580.1	--	Major facilitator superfamily protein	LOC_Os04g37990.1	--	transporter family protein, putative, expressed
Seita.6G119100	blue	yes	3061.58	0.813054	AT1G67850.2	--	Protein of unknown function (DUF707)	LOC_Os06g51200.1	--	lysine ketoglutarate reductase trans-splicing related 1, putative, expressed
Seita.3G008100	blue	yes	3088.42	0.812957	AT5G03540.1	ATEXO70A1,EXO70A1	exocyst subunit exo70 family protein A1	LOC_Os04g58880.1	--	exo70 exocyst complex subunit, putative, expressed
Seita.4G134100	blue	yes	2981.86	0.812495	AT5G10760.1	--	Eukaryotic aspartyl protease family protein	LOC_Os06g20110.1	--	expressed protein
Seita.9G546500	blue	yes	3028.84	0.812397	AT2G33420.1	--	Protein of unknown function (DUF810)	LOC_Os03g04560.1	--	expressed protein
Seita.6G007800	blue	yes	3237.99	0.81201	AT5G64620.1	ATC/VIF2,C/VIF2	cell wall / vacuolar inhibitor of fructosidase 2	LOC_Os12g18560.1	--	invertase/pectin methylesterase inhibitor family protein, putative, expressed
Seita.4G068100	blue	yes	3243.49	0.811976	AT5G50380.1	ATEXO70F1,EXO70F1	exocyst subunit exo70 family protein F1	LOC_Os09g17810.1	--	leucine zipper protein-like, putative, expressed
Seita.4G105400	blue	yes	3252.2	0.8119	AT5G62560.1	--	RING/U-box superfamily protein with ARM repeat domain	LOC_Os06g13080.1	--	spotted leaf 11, putative, expressed
Seita.3G071200	blue	yes	3109.93	0.81184	AT5G06860.1	ATPGIP1,PGIP1	polygalacturonase inhibiting protein 1	LOC_Os05g01444.1	--	polygalacturonase inhibitor precursor, putative, expressed
Seita.9G346300	blue	yes	3260.51	0.811477	AT1G10360.1	ATGSTU18,GST29,GSTU18	glutathione S-transferase TAU 18	LOC_Os10g38610.1	--	glutathione S-transferase, putative, expressed
Seita.1G077100	blue	yes	2953.5	0.811299	AT1G16670.1	--	Protein kinase superfamily protein	LOC_Os02g06930.1	--	protein kinase, putative, expressed
Seita.2G093400	blue	yes	3190.58	0.811246	AT5G05880.1	--	UDP-Glycosyltransferase superfamily protein	LOC_Os07g13810.1	--	cytokinin-N-glucosyltransferase 1, putative, expressed
Seita.3G341800	blue	yes	2986.7	0.811058	AT2G02100.1	LCR69,PDF2.2	low-molecular-weight cysteine-rich 69	LOC_Os04g11165.1	--	gamma-thionin family domain containing protein, expressed
Seita.8G231000	blue	yes	2975.65	0.811037	--	--	--	--	--	--
Seita.4G203600	blue	yes	3016.51	0.811024	AT5G32440.1	--	Ubiquitin system component Cue protein	LOC_Os06g43520.1	--	cytochrome P450 71D7, putative, expressed
Seita.1G358500	blue	yes	3137.55	0.810958	AT5G60700.1	--	glycosyltransferase family protein 2	LOC_Os02g56260.1	--	expressed protein
Seita.9G417900	blue	yes	3187.46	0.810893	AT5G18270.1	ANAC087	Arabidopsis NAC domain containing protein 87	LOC_Os03g21030.1	--	no apical meristem protein, putative, expressed
Seita.8G012800	blue	yes	3415.4	0.810885	AT2G40740.1	ATWRKY55,WRKY55	WRKY DNA-binding protein 55	LOC_Os11g02480.1	--	WRKY46, expressed
Seita.5G430900	blue	yes	3204.82	0.810618	AT1G14590.1	--	Nucleotide-diphospho-sugar transferase family protein	LOC_Os01g69200.1	--	regulatory protein, putative, expressed
Seita.5G174800	blue	yes	2930.88	0.810478	--	--	--	LOC_Os01g27860.1	--	expressed protein
Seita.9G470800	blue	yes	3049.53	0.809942	--	--	--	LOC_Os03g14150.1	--	expressed protein
Seita.3G313000	blue	yes	3206.95	0.809501	AT5G18310.1	--	--	LOC_Os12g22800.1	--	expressed protein
Seita.7G031400	blue	yes	3084.37	0.809462	AT1G06620.1	--	2-oxoglutarate (2OG) and Fe(II)-dependent oxygenase superfamily protein	LOC_Os04g10350.1	--	1-aminocyclopropane-1-carboxylate oxidase homolog 2, putative, expressed
Seita.9G492600	blue	yes	3448.71	0.809243	AT1G26560.1	BGLU40	beta glucosidase 40	LOC_Os03g11420.1	--	Os3bglu6 - beta-glucosidase/beta-fucosidase/beta-galactosidase, expressed
Seita.8G231700	blue	yes	2977.31	0.809116	--	--	--	--	--	--
Seita.3G215100	blue	yes	2993.32	0.809028	--	--	--	LOC_Os10g31640.1	--	glycine-rich cell wall structural protein 2 precursor, putative, expressed
Seita.1G053800	blue	yes	3023.7	0.808932	AT2G33580.1	--	Protein kinase superfamily protein	LOC_Os02g09960.1	--	LYK8, putative, expressed
Seita.3G168900	blue	yes	2999.73	0.80883	AT4G18880.1	AT-HSFA4A,HSF A4A	heat shock transcription factor A4A	LOC_Os05g45410.1	--	HSF-type DNA-binding domain containing protein, expressed
Seita.1G141900	blue	yes	3055.17	0.808787	AT3G59080.1	--	Eukaryotic aspartyl protease family protein	LOC_Os02g21040.1	--	aspartic proteinase nepenthesin precursor, putative, expressed
Seita.9G413900	blue	yes	3052.24	0.808521	AT5G05190.1	--	Protein of unknown function (DUF3133)	LOC_Os03g21640.1	--	expressed protein
Seita.1G276300	blue	yes	3081.74	0.80849	AT2G44670.1	--	Protein of unknown function (DUF581)	LOC_Os02g46180.1	--	DUF581 domain containing protein, expressed
Seita.1G355300	blue	yes	2967.12	0.808437	AT5G35200.1	--	ENTH/ANTH/VHS superfamily protein	LOC_Os02g55970.1	--	ANTH, putative, expressed
Seita.1G218500	blue	yes	3138.94	0.808038	AT4G24730.4	--	Calcineurin-like metallo-phosphoesterase superfamily protein	LOC_Os02g38230.1	--	high affinity nitrate transporter, putative, expressed
Seita.9G287700	blue	yes	3070.88	0.807765	AT4G34940.1	ARO1	armadillo repeat only 1	LOC_Os10g05730.1	--	armadillo/beta-catenin repeat family protein, putative, expressed
Seita.3G380300	blue	yes	2971.21	0.807722	AT1G07530.1	ATGRAS2,GRAS2,SCL14	SCARECROW-like 14	LOC_Os11g47890.1	--	GRAS family transcription factor domain containing protein, expressed
Seita.5G374800	blue	yes	3070.21	0.807602	AT3G53600.1	--	C2H2-type zinc finger family protein	LOC_Os01g62130.1	--	ZOS1-14 - C2H2 zinc finger protein, expressed
Seita.5G149700	blue	yes	3168.61	0.807461	--	--	--	--	--	--
Seita.6G138300	blue	yes	3194.18	0.807452	AT4G04990.1	--	Protein of unknown function (DUF761)	LOC_Os08g31090.1	--	expressed protein
Seita.2G111700	blue	yes	3103.62	0.807448	AT5G66210.2	CPK28	calcium-dependent protein kinase 28	LOC_Os07g22710.1	--	CAMK_CAMK_like.32 - CAMK includes calcium/calmodulin depedent protein kinases, expressed
Seita.1G162600	blue	yes	2966.64	0.807337	AT5G39160.1	--	RmlC-like cupins superfamily protein	LOC_Os02g29000.1	--	Cupin domain containing protein, expressed
Seita.9G504000	blue	yes	2975.57	0.806862	AT5G27470.1	--	seryl-tRNA synthetase / serine--tRNA ligase	LOC_Os03g10190.1	--	seryl-tRNA synthetase, putative, expressed
Seita.9G029200	blue	yes	3259.25	0.806837	AT3G11340.1	--	UDP-Glycosyltransferase superfamily protein	LOC_Os03g60960.1	--	cytokinin-N-glucosyltransferase 1, putative, expressed
Seita.7G298400	blue	yes	3388.53	0.806687	AT2G36090.1	--	F-box family protein	LOC_Os11g05660.1	--	OsFBX396 - F-box domain containing protein, expressed
Seita.5G239900	blue	yes	3118.77	0.806628	AT5G62770.1	--	Protein of unknown function (DUF1645)	LOC_Os01g45250.1	--	DUF1645 domain containing protein, putative, expressed
Seita.5G266000	blue	yes	3169.11	0.806405	AT3G05700.1	--	Drought-responsive family protein	LOC_Os01g48190.1	--	drought induced 19 protein, putative, expressed
Seita.2G062100	blue	yes	3082.18	0.806178	AT3G07040.1	RPM1,RPS3	NB-ARC domain-containing disease resistance protein	LOC_Os07g08890.1	--	disease resistance protein RPM1, putative, expressed
Seita.5G178200	blue	yes	3239.69	0.806096	AT2G41640.1	--	Glycosyltransferase family 61 protein	LOC_Os01g31370.1	--	glycosyltransferase, putative, expressed
Seita.3G025500	blue	yes	3119.96	0.806059	AT5G26690.1	--	Heavy metal transport/detoxification superfamily protein	LOC_Os04g56570.1	--	heavy metal-associated domain containing protein, expressed
Seita.1G256800	blue	yes	2917.34	0.805966	AT4G16820.1	PLA-I{beta]2	alpha/beta-Hydrolases superfamily protein	LOC_Os02g43700.1	--	triacylglycerol lipase like protein, putative, expressed
Seita.9G033200	blue	yes	3043.85	0.805945	AT2G28890.1	PLL4	poltergeist like 4	LOC_Os03g60650.1	--	protein phosphatase 2C, putative, expressed
Seita.5G153700	blue	yes	3038.15	0.805828	AT2G46930.1	--	Pectinacetylesterase family protein	LOC_Os01g21630.1	--	pectinacetylesterase domain containing protein, expressed
Seita.5G316200	blue	yes	3297.19	0.805723	AT5G58950.1	--	Protein kinase superfamily protein	LOC_Os01g54350.1	--	protein kinase domain containing protein, expressed
Seita.9G451100	blue	yes	3333.55	0.805506	AT1G78570.1	ATRHM1,RHM1,ROL1	rhamnose biosynthesis 1	LOC_Os03g17000.3	--	NAD dependent epimerase/dehydratase family domain containing protein, expressed
Seita.9G548400	blue	yes	3303.33	0.805325	AT2G17705.1	--	--	LOC_Os03g04370.1	--	protein-methionine-S-oxide reductase, putative, expressed
Seita.8G110100	blue	yes	3123.66	0.804625	AT4G35160.1	--	O-methyltransferase family protein	LOC_Os05g43940.1	--	O-methyltransferase, putative, expressed
Seita.9G497400	blue	yes	3249.23	0.804393	AT5G10200.1	--	ARM-repeat/Tetratricopeptide repeat (TPR)-like protein	LOC_Os03g10980.1	--	expressed protein
Seita.9G081200	blue	yes	3082.21	0.804184	AT5G43150.1	--	--	LOC_Os07g02460.1	--	expressed protein
Seita.9G570800	blue	yes	3420.84	0.804156	AT5G23760.1	--	Copper transport protein family	LOC_Os10g36200.1	--	heavy metal-associated domain containing protein, expressed
Seita.9G187200	blue	yes	3344.24	0.804149	AT4G21380.1	ARK3,RK3	receptor kinase 3	LOC_Os03g35600.1	--	serine/threonine-protein kinase receptor precursor, putative, expressed
Seita.6G244300	blue	yes	3172.54	0.80404	AT5G03630.1	ATMDAR2	Pyridine nucleotide-disulphide oxidoreductase family protein	LOC_Os08g44340.1	--	monodehydroascorbate reductase, putative, expressed
Seita.5G346900	blue	yes	2953.19	0.80401	AT4G10540.1	--	Subtilase family protein	LOC_Os01g58240.1	--	OsSub6 - Putative Subtilisin homologue, expressed
Seita.2G230700	blue	yes	3000.49	0.803975	AT2G03220.1	ATFT1,ATFUT1,FT1,MUR2	fucosyltransferase 1	LOC_Os09g28460.1	--	xyloglucan fucosyltransferase, putative, expressed
Seita.3G347000	blue	yes	2980.45	0.803943	AT3G07040.1	RPM1,RPS3	NB-ARC domain-containing disease resistance protein	LOC_Os08g14850.1	--	resistance protein, putative, expressed
Seita.7G218100	blue	yes	3165.63	0.803885	AT2G35270.1	GIK	Predicted AT-hook DNA-binding family protein	LOC_Os04g50030.1	--	DNA binding protein, putative, expressed
Seita.2G159400	blue	yes	2951.89	0.803722	--	--	--	LOC_Os09g10010.1	--	expressed protein
Seita.5G338800	blue	yes	3559.66	0.803559	AT5G15070.1	--	Phosphoglycerate mutase-like family protein	LOC_Os01g56980.1	--	histidine acid phosphatase, putative, expressed
Seita.1G203900	blue	yes	3185.73	0.80354	AT1G72220.1	--	RING/U-box superfamily protein	LOC_Os02g36330.1	--	RING-H2 finger protein ATL1O, putative, expressed
Seita.1G012500	blue	yes	3176.18	0.803538	AT1G64140.1	--	--	LOC_Os02g15880.2	--	CPuORF16 - conserved peptide uORF-containing transcript, expressed
Seita.5G303100	blue	yes	3040.94	0.803455	AT1G28290.1	AGP31	arabinogalactan protein 31	LOC_Os01g52660.1	--	POEI51 - Pollen Ole e I allergen and extensin family protein precursor, expressed
Seita.8G069000	blue	yes	2942.96	0.80342	AT5G25140.1	CYP71B13	cytochrome P450, family 71, subfamily B, polypeptide 13	LOC_Os10g30380.1	--	cytochrome P450, putative, expressed
Seita.6G136500	blue	yes	2955.14	0.803019	AT3G47790.1	ATATH7,ATH7	ABC2 homolog 7	LOC_Os08g30780.1	--	ABC transporter, ATP-binding protein, putative, expressed
Seita.9G130100	blue	yes	2998.9	0.80285	AT3G22600.1	--	Bifunctional inhibitor/lipid-transfer protein/seed storage 2S albumin superfamily protein	LOC_Os07g07930.1	--	LTPL78 - Protease inhibitor/seed storage/LTP family protein precursor, expressed
Seita.9G392700	blue	yes	2958.32	0.802756	AT4G11290.1	--	Peroxidase superfamily protein	LOC_Os03g25360.1	--	peroxidase precursor, putative, expressed
Seita.2G220500	blue	yes	2970.43	0.802425	--	--	--	--	--	--
Seita.9G437600	blue	yes	3108.72	0.802229	AT3G08890.2	--	Protein of unknown function, DUF538	LOC_Os03g18560.1	--	DUF538 domain containing protein, putative, expressed
Seita.9G539500	blue	yes	3285.75	0.80214	AT2G42430.1	ASL18,LBD16	lateral organ boundaries-domain 16	LOC_Os03g05500.1	--	DUF260 domain containing protein, putative, expressed
Seita.2G374200	blue	yes	3136.15	0.801667	--	--	--	LOC_Os07g40040.1	--	expressed protein
Seita.2G436000	blue	yes	3061.86	0.801611	AT1G61110.1	anac025,NAC025	NAC domain containing protein 25	LOC_Os07g48450.1	--	no apical meristem protein, putative, expressed
Seita.5G301300	blue	yes	2969.18	0.801518	--	--	--	LOC_Os01g32670.1	--	expressed protein
Seita.3G008900	blue	yes	3271.01	0.801465	AT5G04820.1	ATOFP13,OFP13	ovate family protein 13	LOC_Os04g58820.1	--	ATOFP18/OFP18, putative, expressed
Seita.9G392800	blue	yes	3082.7	0.801267	AT1G14540.1	--	Peroxidase superfamily protein	LOC_Os03g25330.1	--	peroxidase precursor, putative, expressed
Seita.7G316300	blue	yes	3256.94	0.800913	AT3G10300.3	--	Calcium-binding EF-hand family protein	LOC_Os12g04240.1	--	peflin, putative, expressed
Seita.5G352200	blue	yes	3258.93	0.800589	AT3G56630.1	CYP94D2	cytochrome P450, family 94, subfamily D, polypeptide 2	LOC_Os01g58990.1	--	cytochrome P450, putative, expressed
Seita.4G249300	blue	yes	3028.3	0.800562	AT3G10820.2	--	Transcription elongation factor (TFIIS) family protein	LOC_Os03g18470.1	--	expressed protein
Seita.9G132700	blue	yes	3096.36	0.80045	AT1G74790.1	--	catalytics	LOC_Os03g48540.1	--	expressed protein
Seita.2G293600	blue	yes	2979.23	0.800394	AT5G48930.1	HCT	hydroxycinnamoyl-CoA shikimate/quinate hydroxycinnamoyl transferase	LOC_Os09g37180.1	--	transferase family protein, putative, expressed
Seita.4G078200	blue	yes	2943.39	0.800239	AT1G76680.1	ATOPR1,OPR1	12-oxophytodienoate reductase 1	LOC_Os06g11210.1	--	12-oxophytodienoate reductase, putative, expressed
Seita.1G285500	blue	yes	3122.05	0.800219	--	--	--	--	--	--
Seita.5G457000	blue	no	2925.4	0.79976	--	--	--	--	--	--
Seita.5G285700	blue	no	3125.57	0.799692	AT2G04160.1	AIR3	Subtilisin-like serine endopeptidase family protein	LOC_Os09g30250.1	--	OsSub58 - Putative Subtilisin homologue, expressed
Seita.6G038700	blue	no	2964.62	0.799596	AT5G39110.1	--	RmlC-like cupins superfamily protein	LOC_Os12g05860.1	--	Cupin domain containing protein, expressed
Seita.3G221900	blue	no	3267.82	0.799178	AT5G52390.1	--	PAR1 protein	--	--	--
Seita.2G373600	blue	no	3203.65	0.798917	AT5G67450.1	AZF1,ZF1	zinc-finger protein 1	LOC_Os07g39960.1	--	ZOS7-07 - C2H2 zinc finger protein, expressed
Seita.7G140300	blue	no	3067.99	0.798801	AT3G28345.1	--	ABC transporter family protein	LOC_Os04g40570.1	--	ABC transporter, ATP-binding protein, putative, expressed
Seita.9G449800	blue	no	2958.56	0.798668	AT1G27660.1	--	basic helix-loop-helix (bHLH) DNA-binding superfamily protein	LOC_Os03g17130.1	--	bHelix-loop-helix transcription factor, putative, expressed
Seita.5G032100	blue	no	3071.44	0.798546	AT3G62130.1	--	Pyridoxal phosphate (PLP)-dependent transferases superfamily protein	LOC_Os01g18640.1	--	aminotransferase, putative, expressed
Seita.4G018500	blue	no	3197.93	0.798367	AT4G24050.1	--	NAD(P)-binding Rossmann-fold superfamily protein	LOC_Os06g03830.1	--	retinol dehydrogenase, putative, expressed
Seita.7G085400	blue	no	3138.68	0.798257	AT1G47980.1	--	--	LOC_Os04g33150.1	--	desiccation-related protein PCC13-62 precursor, putative, expressed
Seita.1G340300	blue	no	2975.84	0.798156	AT3G14067.1	--	Subtilase family protein	LOC_Os02g53860.1	--	OsSub22 - Putative Subtilisin homologue, expressed
Seita.9G238900	blue	no	3007.74	0.797994	--	--	--	--	--	--
Seita.9G356900	blue	no	2969.42	0.797715	AT4G21380.1	ARK3,RK3	receptor kinase 3	LOC_Os09g37840.1	--	carbohydrate binding protein, putative, expressed
Seita.9G447200	blue	no	3185.36	0.797455	AT3G55090.1	--	ABC-2 type transporter family protein	LOC_Os03g17370.1	--	white-brown complex homolog protein, putative, expressed
Seita.5G144000	blue	no	2996.38	0.797415	--	--	--	--	--	--
Seita.7G161700	blue	no	3177.62	0.797367	AT5G60710.1	--	Zinc finger (C3HC4-type RING finger) family protein	LOC_Os04g42980.1	--	zinc finger family protein, putative, expressed
Seita.7G249900	blue	no	2983.25	0.797346	AT3G20660.1	4-Oct,AtOCT4	organic cation/carnitine transporter4	LOC_Os04g53930.1	--	organic cation transporter protein, putative, expressed
Seita.9G353800	blue	no	2952.52	0.79723	AT1G59590.1	ZCF37	ZCF37	LOC_Os03g31740.1	--	ZCF37, putative, expressed
Seita.9G357500	blue	no	2925.01	0.797034	AT1G27730.1	STZ,ZAT10	salt tolerance zinc finger	LOC_Os03g32230.1	--	ZOS3-12 - C2H2 zinc finger protein, expressed
Seita.2G011300	blue	no	3037.03	0.796942	AT3G14460.1	--	LRR and NB-ARC domains-containing disease resistance protein	LOC_Os08g16460.1	--	NBS-LRR disease resistance protein, putative, expressed
Seita.2G273900	blue	no	3306.74	0.79685	--	--	--	LOC_Os09g34020.1	--	expressed protein
Seita.5G379200	blue	no	2952.22	0.796726	AT3G23160.1	--	Protein of unknown function (DUF668)	LOC_Os01g62670.1	--	avr9/Cf-9 rapidly elicited protein, putative, expressed
Seita.J004700	blue	no	3405.67	0.796643	AT1G06150.2	EMB1444	basic helix-loop-helix (bHLH) DNA-binding superfamily protein	LOC_Os07g01130.1	--	pentatricopeptide containing protein, putative, expressed
Seita.4G158300	blue	no	3295.72	0.796195	AT3G26560.1	--	ATP-dependent RNA helicase, putative	LOC_Os06g23530.1	--	pre-mRNA-splicing factor ATP-dependent RNA helicase, putative, expressed
Seita.9G432100	blue	no	3031.97	0.796181	AT5G49350.1	--	Glycine-rich protein family	LOC_Os03g19170.1	--	GCRP7 - Glycine and cysteine rich family protein precursor, expressed
Seita.3G166100	blue	no	3060.31	0.796122	AT1G74320.1	--	Protein kinase superfamily protein	LOC_Os05g45880.1	--	phosphotransferase, putative, expressed
Seita.7G131500	blue	no	3120.49	0.795964	AT4G05030.1	--	Copper transport protein family	LOC_Os04g39010.1	--	heavy metal associated domain containing protein, expressed
Seita.7G056800	blue	no	3338.71	0.795957	AT1G15960.1	ATNRAMP6,NRAMP6	NRAMP metal ion transporter 6	LOC_Os01g31870.1	--	natural resistance-associated macrophage protein, putative, expressed
Seita.2G252300	blue	no	3312.14	0.795953	AT3G12630.1	--	A20/AN1-like zinc finger family protein	LOC_Os09g31200.1	--	AN1-like zinc finger domain containing protein, expressed
Seita.8G064900	blue	no	3377.32	0.795927	AT3G07040.1	RPM1,RPS3	NB-ARC domain-containing disease resistance protein	ChrUn.fgenesh.mRNA.29	--	expressed protein
Seita.1G310700	blue	no	3000.24	0.79592	--	--	--	--	--	--
Seita.8G078700	blue	no	3116.13	0.795866	AT5G27730.1	--	Protein of unknown function (DUF1624)	LOC_Os11g14080.1	--	heparan-alpha-glucosaminide N-acetyltransferase, putative, expressed
Seita.1G095600	blue	no	3278.75	0.795611	AT1G70420.1	--	Protein of unknown function (DUF1645)	LOC_Os02g04130.1	--	DUF1645 domain containing protein, putative, expressed
Seita.7G023100	blue	no	3097.51	0.795282	AT5G20810.2	--	SAUR-like auxin-responsive protein family	LOC_Os02g05050.1	--	OsSAUR4 - Auxin-responsive SAUR gene family member, expressed
Seita.5G036500	blue	no	3282.22	0.795116	AT3G57230.1	AGL16	AGAMOUS-like 16	LOC_Os04g23910.1	--	OsMADS25 - MADS-box family gene with MIKCc type-box, expressed
Seita.7G296400	blue	no	2904.98	0.794778	AT2G35460.1	--	Late embryogenesis abundant (LEA) hydroxyproline-rich glycoprotein family	LOC_Os12g06220.1	--	harpin-induced protein 1 domain containing protein, expressed
Seita.3G289300	blue	no	3034.69	0.794656	AT3G08670.1	--	--	LOC_Os05g25220.1	--	expressed protein
Seita.8G056500	blue	no	2943.7	0.794379	AT1G65870.1	--	Disease resistance-responsive (dirigent-like protein) family protein	LOC_Os11g07690.1	--	dirigent, putative, expressed
Seita.9G091900	blue	no	2921.1	0.794131	AT2G38290.1	AMT2,AMT2;1,ATAMT2	ammonium transporter 2	LOC_Os01g65000.1	--	ammonium transporter protein, putative, expressed
Seita.7G171800	blue	no	3329.39	0.794085	AT3G53150.1	UGT73D1	UDP-glucosyl transferase 73D1	LOC_Os04g44240.1	--	cytokinin-O-glucosyltransferase 3, putative, expressed
Seita.1G314500	blue	no	3387.58	0.793991	AT1G70140.1	ATFH8,FH8	formin 8	LOC_Os02g50570.1	--	retrotransposon protein, putative, unclassified, expressed
Seita.6G190400	blue	no	3232.3	0.793742	AT5G38790.1	--	--	LOC_Os08g37990.1	--	expressed protein
Seita.5G462600	blue	no	3032.74	0.793653	AT5G07010.1	ATST2A,ST2A	sulfotransferase 2A	LOC_Os08g40380.1	--	sulfotransferase domain containing protein, expressed
Seita.9G303300	blue	no	3295.23	0.793634	AT5G09640.1	SCPL19,SNG2	serine carboxypeptidase-like 19	LOC_Os10g01110.1	--	OsSCP44 - Putative Serine Carboxypeptidase homologue, expressed
Seita.4G210500	blue	no	2887.03	0.793541	AT1G15520.1	ABCG40,ATABCG40,ATPDR12,PDR12	pleiotropic drug resistance 12	LOC_Os01g42380.1	--	pleiotropic drug resistance protein, putative, expressed
[truncated: 26,403 more rows]
