# Supplementary material for: Response of Multiple Tissues to Drought Revealed by a Weighted Gene Co-Expression Network Analysis in Foxtail Millet [Setaria italica (L.) P. Beauv.]
Source: Front Plant Sci. 2022 Jan 12;12:746166. doi: 10.3389/fpls.2021.746166 (PMC8790073; doi:10.3389/fpls.2021.746166)
Supplement: Supplementary Table S12 — A list of GO categories of each module. [file Table_12.XLSX]

## Sheet: Supplementary Table S12
Supplementary Table S12: List of GO categories of each module
Cluster	ONTOLOGY	ID	Description	GeneRatio	BgRatio	pvalue	p.adjust	qvalue	geneID	Count
black	BP	GO:0022613	ribonucleoprotein complex biogenesis	87/304	315/9983	2.66387e-61	3.45504e-58	3.10691e-58	Seita.1G002300/Seita.1G014600/Seita.1G023800/Seita.1G117100/Seita.1G130800/Seita.1G166300/Seita.1G181600/Seita.1G181800/Seita.1G214900/Seita.1G215000/Seita.1G236300/Seita.1G238800/Seita.1G305100/Seita.1G344200/Seita.1G356100/Seita.1G370900/Seita.2G048400/Seita.2G059900/Seita.2G151200/Seita.2G267400/Seita.2G274700/Seita.2G327300/Seita.2G344700/Seita.2G389700/Seita.2G404800/Seita.2G417700/Seita.3G1…	87
black	BP	GO:0042254	ribosome biogenesis	79/304	256/9983	1.51154e-59	9.80231e-57	8.81464e-57	Seita.1G014600/Seita.1G023800/Seita.1G117100/Seita.1G130800/Seita.1G166300/Seita.1G181600/Seita.1G181800/Seita.1G214900/Seita.1G215000/Seita.1G236300/Seita.1G238800/Seita.1G305100/Seita.1G344200/Seita.1G356100/Seita.1G370900/Seita.2G048400/Seita.2G059900/Seita.2G151200/Seita.2G267400/Seita.2G327300/Seita.2G389700/Seita.2G404800/Seita.2G417700/Seita.3G119800/Seita.3G137600/Seita.3G149800/Seita.3G1…	79
black	BP	GO:0006412	translation	77/304	315/9983	1.55267e-49	6.71272e-47	6.03635e-47	Seita.1G023800/Seita.1G034300/Seita.1G117100/Seita.1G166300/Seita.1G181800/Seita.1G214900/Seita.1G231100/Seita.1G238800/Seita.1G305100/Seita.1G329300/Seita.1G344200/Seita.2G048400/Seita.2G079700/Seita.2G143900/Seita.2G267400/Seita.2G274700/Seita.2G344700/Seita.2G362700/Seita.2G378300/Seita.2G389700/Seita.2G417700/Seita.3G036500/Seita.3G071100/Seita.3G145500/Seita.3G153000/Seita.3G155500/Seita.3G1…	77
black	BP	GO:0043043	peptide biosynthetic process	77/304	325/9983	1.91754e-48	6.21761e-46	5.59113e-46	Seita.1G023800/Seita.1G034300/Seita.1G117100/Seita.1G166300/Seita.1G181800/Seita.1G214900/Seita.1G231100/Seita.1G238800/Seita.1G305100/Seita.1G329300/Seita.1G344200/Seita.2G048400/Seita.2G079700/Seita.2G143900/Seita.2G267400/Seita.2G274700/Seita.2G344700/Seita.2G362700/Seita.2G378300/Seita.2G389700/Seita.2G417700/Seita.3G036500/Seita.3G071100/Seita.3G145500/Seita.3G153000/Seita.3G155500/Seita.3G1…	77
black	BP	GO:0006518	peptide metabolic process	79/304	378/9983	2.33231e-45	6.05001e-43	5.44042e-43	Seita.1G023800/Seita.1G034300/Seita.1G117100/Seita.1G166300/Seita.1G181800/Seita.1G214900/Seita.1G231100/Seita.1G238800/Seita.1G305100/Seita.1G329300/Seita.1G344200/Seita.2G048400/Seita.2G079700/Seita.2G143900/Seita.2G267400/Seita.2G274700/Seita.2G303500/Seita.2G344700/Seita.2G362700/Seita.2G378300/Seita.2G389700/Seita.2G417700/Seita.3G036500/Seita.3G071100/Seita.3G145500/Seita.3G153000/Seita.3G1…	79
black	BP	GO:0043604	amide biosynthetic process	77/304	374/9983	1.20582e-43	2.60658e-41	2.34394e-41	Seita.1G023800/Seita.1G034300/Seita.1G117100/Seita.1G166300/Seita.1G181800/Seita.1G214900/Seita.1G231100/Seita.1G238800/Seita.1G305100/Seita.1G329300/Seita.1G344200/Seita.2G048400/Seita.2G079700/Seita.2G143900/Seita.2G267400/Seita.2G274700/Seita.2G344700/Seita.2G362700/Seita.2G378300/Seita.2G389700/Seita.2G417700/Seita.3G036500/Seita.3G071100/Seita.3G145500/Seita.3G153000/Seita.3G155500/Seita.3G1…	77
black	BP	GO:0043603	cellular amide metabolic process	79/304	469/9983	4.24651e-38	7.86817e-36	7.07539e-36	Seita.1G023800/Seita.1G034300/Seita.1G117100/Seita.1G166300/Seita.1G181800/Seita.1G214900/Seita.1G231100/Seita.1G238800/Seita.1G305100/Seita.1G329300/Seita.1G344200/Seita.2G048400/Seita.2G079700/Seita.2G143900/Seita.2G267400/Seita.2G274700/Seita.2G303500/Seita.2G344700/Seita.2G362700/Seita.2G378300/Seita.2G389700/Seita.2G417700/Seita.3G036500/Seita.3G071100/Seita.3G145500/Seita.3G153000/Seita.3G1…	79
black	BP	GO:0006364	rRNA processing	47/304	162/9983	1.17631e-33	1.90709e-31	1.71494e-31	Seita.1G014600/Seita.1G117100/Seita.1G130800/Seita.1G166300/Seita.1G181600/Seita.1G181800/Seita.1G215000/Seita.1G236300/Seita.1G305100/Seita.1G356100/Seita.1G370900/Seita.2G267400/Seita.2G327300/Seita.2G389700/Seita.2G404800/Seita.2G417700/Seita.3G149800/Seita.3G168700/Seita.3G186100/Seita.4G106800/Seita.4G122000/Seita.4G177300/Seita.5G049800/Seita.5G057000/Seita.5G354400/Seita.6G007400/Seita.6G0…	47
black	BP	GO:0016072	rRNA metabolic process	47/304	174/9983	4.37221e-32	6.30084e-30	5.66597e-30	Seita.1G014600/Seita.1G117100/Seita.1G130800/Seita.1G166300/Seita.1G181600/Seita.1G181800/Seita.1G215000/Seita.1G236300/Seita.1G305100/Seita.1G356100/Seita.1G370900/Seita.2G267400/Seita.2G327300/Seita.2G389700/Seita.2G404800/Seita.2G417700/Seita.3G149800/Seita.3G168700/Seita.3G186100/Seita.4G106800/Seita.4G122000/Seita.4G177300/Seita.5G049800/Seita.5G057000/Seita.5G354400/Seita.6G007400/Seita.6G0…	47
black	BP	GO:0042273	ribosomal large subunit biogenesis	33/304	74/9983	6.00033e-31	7.78243e-29	6.99828e-29	Seita.1G014600/Seita.1G023800/Seita.1G117100/Seita.1G166300/Seita.1G214900/Seita.1G215000/Seita.1G238800/Seita.1G305100/Seita.1G344200/Seita.2G267400/Seita.3G119800/Seita.3G153000/Seita.3G168700/Seita.3G186100/Seita.4G043000/Seita.4G122000/Seita.4G177300/Seita.4G249700/Seita.6G017200/Seita.6G224900/Seita.7G064700/Seita.7G134600/Seita.7G166100/Seita.7G228400/Seita.7G273300/Seita.7G290900/Seita.7G3…	33
black	BP	GO:0034470	ncRNA processing	53/304	252/9983	3.10234e-30	3.47837e-28	3.1279e-28	Seita.1G014600/Seita.1G032400/Seita.1G117100/Seita.1G130800/Seita.1G166300/Seita.1G181600/Seita.1G181800/Seita.1G215000/Seita.1G230600/Seita.1G236300/Seita.1G305100/Seita.1G356100/Seita.1G370900/Seita.2G240300/Seita.2G267400/Seita.2G327300/Seita.2G389700/Seita.2G404800/Seita.2G417700/Seita.3G149800/Seita.3G168700/Seita.3G186100/Seita.4G106800/Seita.4G122000/Seita.4G177300/Seita.5G049800/Seita.5G0…	53
black	BP	GO:0034660	ncRNA metabolic process	59/304	322/9983	3.21823e-30	3.47837e-28	3.1279e-28	Seita.1G014600/Seita.1G032400/Seita.1G117100/Seita.1G130800/Seita.1G166300/Seita.1G181600/Seita.1G181800/Seita.1G215000/Seita.1G230600/Seita.1G236300/Seita.1G305100/Seita.1G329300/Seita.1G356100/Seita.1G370900/Seita.2G240300/Seita.2G267400/Seita.2G327300/Seita.2G389700/Seita.2G404800/Seita.2G417700/Seita.3G036500/Seita.3G149800/Seita.3G168700/Seita.3G186100/Seita.3G343300/Seita.4G106800/Seita.4G1…	59
black	BP	GO:0022618	ribonucleoprotein complex assembly	34/304	133/9983	1.63648e-22	1.6327e-20	1.46819e-20	Seita.1G002300/Seita.1G014600/Seita.1G023800/Seita.1G181800/Seita.1G214900/Seita.1G215000/Seita.2G059900/Seita.2G151200/Seita.2G274700/Seita.2G344700/Seita.2G389700/Seita.3G119800/Seita.3G185900/Seita.3G186100/Seita.5G462400/Seita.6G007400/Seita.6G231700/Seita.7G091900/Seita.7G099000/Seita.7G134600/Seita.7G273300/Seita.7G290900/Seita.7G333600/Seita.8G020000/Seita.8G046000/Seita.9G147700/Seita.9G2…	34
black	BP	GO:0042255	ribosome assembly	26/304	70/9983	4.33472e-22	4.01581e-20	3.61118e-20	Seita.1G014600/Seita.1G023800/Seita.1G181800/Seita.1G214900/Seita.1G215000/Seita.2G059900/Seita.2G151200/Seita.2G389700/Seita.3G119800/Seita.3G186100/Seita.5G462400/Seita.6G007400/Seita.7G091900/Seita.7G099000/Seita.7G134600/Seita.7G273300/Seita.7G290900/Seita.7G333600/Seita.8G020000/Seita.8G046000/Seita.9G218400/Seita.9G229000/Seita.9G233700/Seita.9G361400/Seita.9G371600/Seita.9G575800	26
black	BP	GO:0071826	ribonucleoprotein complex subunit organization	34/304	138/9983	6.02893e-22	5.21301e-20	4.68776e-20	Seita.1G002300/Seita.1G014600/Seita.1G023800/Seita.1G181800/Seita.1G214900/Seita.1G215000/Seita.2G059900/Seita.2G151200/Seita.2G274700/Seita.2G344700/Seita.2G389700/Seita.3G119800/Seita.3G185900/Seita.3G186100/Seita.5G462400/Seita.6G007400/Seita.6G231700/Seita.7G091900/Seita.7G099000/Seita.7G134600/Seita.7G273300/Seita.7G290900/Seita.7G333600/Seita.8G020000/Seita.8G046000/Seita.9G147700/Seita.9G2…	34
black	BP	GO:0002181	cytoplasmic translation	20/304	56/9983	7.3748e-17	5.9782e-15	5.37584e-15	Seita.1G117100/Seita.1G214900/Seita.1G344200/Seita.2G378300/Seita.3G153000/Seita.3G197300/Seita.3G217000/Seita.3G276200/Seita.4G023300/Seita.4G043000/Seita.4G238500/Seita.5G025800/Seita.5G043000/Seita.5G376500/Seita.6G017200/Seita.6G085600/Seita.7G134600/Seita.7G228400/Seita.9G400800/Seita.9G502500	20
black	BP	GO:0042274	ribosomal small subunit biogenesis	18/304	59/9983	6.44243e-14	4.91519e-12	4.41994e-12	Seita.1G130800/Seita.1G181800/Seita.2G059900/Seita.2G151200/Seita.2G389700/Seita.2G417700/Seita.5G049800/Seita.5G354400/Seita.5G462400/Seita.7G075200/Seita.7G091900/Seita.7G099000/Seita.9G131800/Seita.9G218400/Seita.9G361400/Seita.9G371600/Seita.9G407100/Seita.9G575800	18
black	BP	GO:0034622	cellular protein-containing complex assembly	45/304	417/9983	6.85434e-14	4.93893e-12	4.44129e-12	Seita.1G002300/Seita.1G014600/Seita.1G023800/Seita.1G080200/Seita.1G181800/Seita.1G207100/Seita.1G214900/Seita.1G215000/Seita.2G059900/Seita.2G151200/Seita.2G165700/Seita.2G274700/Seita.2G344700/Seita.2G389700/Seita.2G411100/Seita.3G119800/Seita.3G153300/Seita.3G185900/Seita.3G186100/Seita.4G158700/Seita.4G220800/Seita.5G259300/Seita.5G462400/Seita.6G007400/Seita.6G231700/Seita.7G091900/Seita.7G0…	45
black	BP	GO:0000027	ribosomal large subunit assembly	14/304	33/9983	2.13148e-13	1.45502e-11	1.30841e-11	Seita.1G014600/Seita.1G023800/Seita.1G214900/Seita.1G215000/Seita.3G119800/Seita.3G186100/Seita.7G134600/Seita.7G273300/Seita.7G290900/Seita.7G333600/Seita.8G020000/Seita.8G046000/Seita.9G229000/Seita.9G233700	14
black	BP	GO:0070925	organelle assembly	28/304	178/9983	6.00618e-13	3.89501e-11	3.50255e-11	Seita.1G014600/Seita.1G023800/Seita.1G181800/Seita.1G214900/Seita.1G215000/Seita.2G059900/Seita.2G151200/Seita.2G389700/Seita.3G119800/Seita.3G186100/Seita.5G462400/Seita.6G007400/Seita.7G091900/Seita.7G099000/Seita.7G134600/Seita.7G165800/Seita.7G273300/Seita.7G290900/Seita.7G333600/Seita.8G020000/Seita.8G046000/Seita.9G200400/Seita.9G218400/Seita.9G229000/Seita.9G233700/Seita.9G361400/Seita.9G3…	28
black	BP	GO:0000154	rRNA modification	14/304	36/9983	9.09956e-13	5.62006e-11	5.05379e-11	Seita.1G130800/Seita.1G236300/Seita.1G305100/Seita.1G356100/Seita.1G370900/Seita.2G327300/Seita.2G404800/Seita.4G122000/Seita.5G057000/Seita.8G161700/Seita.9G057400/Seita.9G404600/Seita.9G404700/Seita.9G579800	14
black	BP	GO:0000470	maturation of LSU-rRNA	12/304	26/9983	3.38109e-12	1.99331e-10	1.79247e-10	Seita.1G014600/Seita.1G117100/Seita.1G166300/Seita.1G305100/Seita.2G267400/Seita.3G186100/Seita.4G122000/Seita.4G177300/Seita.6G017200/Seita.6G224900/Seita.7G064700/Seita.7G228400	12
black	BP	GO:0000028	ribosomal small subunit assembly	11/304	27/9983	1.47325e-10	8.30782e-09	7.47073e-09	Seita.1G181800/Seita.2G059900/Seita.2G151200/Seita.2G389700/Seita.5G462400/Seita.7G091900/Seita.7G099000/Seita.9G218400/Seita.9G361400/Seita.9G371600/Seita.9G575800	11
black	BP	GO:0043628	ncRNA 3'-end processing	11/304	29/9983	3.70201e-10	2.00063e-08	1.79904e-08	Seita.1G181600/Seita.1G370900/Seita.2G389700/Seita.2G404800/Seita.3G149800/Seita.5G057000/Seita.7G169800/Seita.9G006200/Seita.9G131800/Seita.9G371600/Seita.9G407100	11
black	BP	GO:0031125	rRNA 3'-end processing	8/304	15/9983	3.60687e-09	1.87125e-07	1.6827e-07	Seita.1G181600/Seita.2G389700/Seita.3G149800/Seita.7G169800/Seita.9G006200/Seita.9G131800/Seita.9G371600/Seita.9G407100	8
black	BP	GO:0016073	snRNA metabolic process	10/304	28/9983	4.7759e-09	2.38244e-07	2.14239e-07	Seita.1G181600/Seita.1G236300/Seita.1G305100/Seita.2G404800/Seita.3G149800/Seita.4G122000/Seita.5G057000/Seita.7G169800/Seita.9G006200/Seita.9G057400	10
black	BP	GO:0000469	cleavage involved in rRNA processing	9/304	26/9983	3.9634e-08	1.9039e-06	1.71206e-06	Seita.1G181600/Seita.1G305100/Seita.2G389700/Seita.4G122000/Seita.6G035600/Seita.7G169800/Seita.9G131800/Seita.9G371600/Seita.9G407100	9
black	BP	GO:0000463	maturation of LSU-rRNA from tricistronic rRNA transcript (SSU-rRNA, 5.8S rRNA, LSU-rRNA)	7/304	14/9983	6.47696e-08	2.89676e-06	2.60489e-06	Seita.1G014600/Seita.1G117100/Seita.1G166300/Seita.3G186100/Seita.6G017200/Seita.7G064700/Seita.7G228400	7
black	BP	GO:0031118	rRNA pseudouridine synthesis	7/304	14/9983	6.47696e-08	2.89676e-06	2.60489e-06	Seita.1G236300/Seita.1G305100/Seita.2G404800/Seita.4G122000/Seita.5G057000/Seita.8G161700/Seita.9G057400	7
black	BP	GO:0031123	RNA 3'-end processing	13/304	69/9983	1.25136e-07	5.41004e-06	4.86493e-06	Seita.1G032400/Seita.1G181600/Seita.1G370900/Seita.2G389700/Seita.2G404800/Seita.3G149800/Seita.5G057000/Seita.7G169800/Seita.9G006200/Seita.9G131800/Seita.9G147700/Seita.9G371600/Seita.9G407100	13
black	BP	GO:0040031	snRNA modification	6/304	10/9983	1.43868e-07	6.01927e-06	5.41277e-06	Seita.1G236300/Seita.1G305100/Seita.2G404800/Seita.4G122000/Seita.5G057000/Seita.9G057400	6
black	BP	GO:0090150	establishment of protein localization to membrane	10/304	41/9983	2.8698e-07	1.16316e-05	1.04597e-05	Seita.2G094700/Seita.2G279500/Seita.3G326600/Seita.4G114400/Seita.4G158700/Seita.4G280600/Seita.7G181900/Seita.9G028900/Seita.9G080700/Seita.9G217100	10
black	BP	GO:0031126	snoRNA 3'-end processing	6/304	11/9983	3.08422e-07	1.21219e-05	1.09005e-05	Seita.1G370900/Seita.2G404800/Seita.3G149800/Seita.5G057000/Seita.7G169800/Seita.9G006200	6
black	BP	GO:0016074	snoRNA metabolic process	7/304	19/9983	8.33709e-07	3.18035e-05	2.85991e-05	Seita.1G370900/Seita.2G404800/Seita.3G149800/Seita.5G057000/Seita.7G169800/Seita.8G161700/Seita.9G006200	7
black	BP	GO:0030490	maturation of SSU-rRNA	10/304	46/9983	9.11579e-07	3.37805e-05	3.03768e-05	Seita.1G130800/Seita.1G181800/Seita.2G389700/Seita.2G417700/Seita.5G049800/Seita.7G075200/Seita.7G091900/Seita.9G131800/Seita.9G371600/Seita.9G407100	10
black	BP	GO:0043144	snoRNA processing	6/304	13/9983	1.08781e-06	3.91913e-05	3.52425e-05	Seita.1G370900/Seita.2G404800/Seita.3G149800/Seita.5G057000/Seita.7G169800/Seita.9G006200	6
black	BP	GO:0001522	pseudouridine synthesis	7/304	21/9983	1.82544e-06	6.3989e-05	5.75415e-05	Seita.1G236300/Seita.1G305100/Seita.2G404800/Seita.4G122000/Seita.5G057000/Seita.8G161700/Seita.9G057400	7
black	BP	GO:0000462	maturation of SSU-rRNA from tricistronic rRNA transcript (SSU-rRNA, 5.8S rRNA, LSU-rRNA)	9/304	39/9983	1.89595e-06	6.47119e-05	5.81916e-05	Seita.1G130800/Seita.1G181800/Seita.2G389700/Seita.2G417700/Seita.5G049800/Seita.7G091900/Seita.9G131800/Seita.9G371600/Seita.9G407100	9
black	BP	GO:0034613	cellular protein localization	31/304	440/9983	1.09684e-05	0.000364768	0.000328015	Seita.1G113100/Seita.2G094700/Seita.2G195400/Seita.2G279500/Seita.2G303500/Seita.2G389700/Seita.3G137600/Seita.3G175400/Seita.3G326600/Seita.4G114400/Seita.4G158700/Seita.4G192900/Seita.4G280600/Seita.5G391000/Seita.5G463400/Seita.6G229800/Seita.6G253600/Seita.7G165800/Seita.7G181900/Seita.7G201700/Seita.7G231000/Seita.8G198800/Seita.9G000400/Seita.9G028900/Seita.9G080700/Seita.9G217100/Seita.9G2…	31
black	BP	GO:0072657	protein localization to membrane	10/304	61/9983	1.34551e-05	0.000436282	0.000392323	Seita.2G094700/Seita.2G279500/Seita.3G326600/Seita.4G114400/Seita.4G158700/Seita.4G280600/Seita.7G181900/Seita.9G028900/Seita.9G080700/Seita.9G217100	10
black	BP	GO:0006886	intracellular protein transport	27/304	362/9983	1.51762e-05	0.000480085	0.000431712	Seita.1G113100/Seita.2G094700/Seita.2G195400/Seita.2G303500/Seita.2G389700/Seita.3G137600/Seita.3G175400/Seita.3G326600/Seita.4G114400/Seita.4G158700/Seita.4G192900/Seita.4G280600/Seita.5G391000/Seita.5G463400/Seita.6G229800/Seita.6G253600/Seita.7G165800/Seita.7G181900/Seita.7G201700/Seita.7G231000/Seita.8G198800/Seita.9G028900/Seita.9G080700/Seita.9G217100/Seita.9G231400/Seita.9G371600/Seita.9G5…	27
black	BP	GO:0070727	cellular macromolecule localization	32/304	483/9983	2.71521e-05	0.000838484	0.000753999	Seita.1G113100/Seita.2G094700/Seita.2G195400/Seita.2G279500/Seita.2G303500/Seita.2G389700/Seita.3G137600/Seita.3G175400/Seita.3G326600/Seita.4G114400/Seita.4G158700/Seita.4G192900/Seita.4G280600/Seita.5G391000/Seita.5G463400/Seita.6G229800/Seita.6G253600/Seita.7G165800/Seita.7G169800/Seita.7G181900/Seita.7G201700/Seita.7G231000/Seita.8G198800/Seita.9G000400/Seita.9G028900/Seita.9G080700/Seita.9G2…	32
black	BP	GO:0006399	tRNA metabolic process	14/304	129/9983	3.64672e-05	0.00108079	0.000971895	Seita.1G032400/Seita.1G181600/Seita.1G329300/Seita.2G240300/Seita.3G036500/Seita.3G343300/Seita.5G129000/Seita.7G153300/Seita.7G169800/Seita.7G200100/Seita.9G462100/Seita.9G490200/Seita.9G503900/Seita.9G579800	14
black	BP	GO:0033365	protein localization to organelle	22/304	277/9983	3.72654e-05	0.00108079	0.000971895	Seita.2G094700/Seita.2G279500/Seita.2G303500/Seita.3G137600/Seita.3G175400/Seita.3G326600/Seita.4G114400/Seita.4G158700/Seita.5G391000/Seita.6G229800/Seita.7G165800/Seita.7G181900/Seita.7G201700/Seita.7G231000/Seita.8G198800/Seita.9G000400/Seita.9G028900/Seita.9G080700/Seita.9G217100/Seita.9G231400/Seita.9G438300/Seita.9G559100	22
black	BP	GO:0000466	maturation of 5.8S rRNA from tricistronic rRNA transcript (SSU-rRNA, 5.8S rRNA, LSU-rRNA)	6/304	22/9983	3.74986e-05	0.00108079	0.000971895	Seita.1G181600/Seita.2G389700/Seita.7G169800/Seita.9G131800/Seita.9G371600/Seita.9G407100	6
black	BP	GO:0071028	nuclear mRNA surveillance	5/304	14/9983	4.04597e-05	0.00113241	0.00101831	Seita.1G181600/Seita.2G195400/Seita.3G149800/Seita.7G169800/Seita.9G006200	5
black	BP	GO:0090501	RNA phosphodiester bond hydrolysis	13/304	114/9983	4.10355e-05	0.00113241	0.00101831	Seita.1G032400/Seita.1G181600/Seita.1G305100/Seita.1G370900/Seita.2G389700/Seita.3G149800/Seita.4G122000/Seita.6G035600/Seita.7G169800/Seita.9G006200/Seita.9G131800/Seita.9G371600/Seita.9G407100	13
black	BP	GO:0045184	establishment of protein localization	29/304	428/9983	4.39275e-05	0.00118696	0.00106736	Seita.1G113100/Seita.1G143600/Seita.2G094700/Seita.2G195400/Seita.2G279500/Seita.2G303500/Seita.2G389700/Seita.3G137600/Seita.3G175400/Seita.3G326600/Seita.4G114400/Seita.4G158700/Seita.4G192900/Seita.4G280600/Seita.5G391000/Seita.5G463400/Seita.6G229800/Seita.6G253600/Seita.7G165800/Seita.7G181900/Seita.7G201700/Seita.7G231000/Seita.8G198800/Seita.9G028900/Seita.9G080700/Seita.9G217100/Seita.9G2…	29
black	BP	GO:0001510	RNA methylation	8/304	44/9983	4.59602e-05	0.00121654	0.00109396	Seita.1G130800/Seita.1G356100/Seita.1G370900/Seita.2G240300/Seita.2G327300/Seita.7G200100/Seita.9G462100/Seita.9G579800	8
black	BP	GO:0000460	maturation of 5.8S rRNA	7/304	34/9983	6.00716e-05	0.00155826	0.00140125	Seita.1G181600/Seita.2G389700/Seita.3G149800/Seita.7G169800/Seita.9G131800/Seita.9G371600/Seita.9G407100	7
black	BP	GO:0071806	protein transmembrane transport	11/304	88/9983	6.9047e-05	0.00174646	0.00157048	Seita.2G094700/Seita.3G326600/Seita.4G114400/Seita.4G158700/Seita.4G192900/Seita.7G181900/Seita.7G201700/Seita.9G028900/Seita.9G080700/Seita.9G217100/Seita.9G231400	11
black	BP	GO:0015031	protein transport	28/304	417/9983	7.00198e-05	0.00174646	0.00157048	Seita.1G113100/Seita.1G143600/Seita.2G094700/Seita.2G195400/Seita.2G303500/Seita.2G389700/Seita.3G137600/Seita.3G175400/Seita.3G326600/Seita.4G114400/Seita.4G158700/Seita.4G192900/Seita.4G280600/Seita.5G391000/Seita.5G463400/Seita.6G229800/Seita.6G253600/Seita.7G165800/Seita.7G181900/Seita.7G201700/Seita.7G231000/Seita.8G198800/Seita.9G028900/Seita.9G080700/Seita.9G217100/Seita.9G231400/Seita.9G3…	28
black	BP	GO:0006997	nucleus organization	9/304	60/9983	7.54196e-05	0.00184565	0.00165968	Seita.1G130800/Seita.1G229700/Seita.1G236300/Seita.3G150300/Seita.3G168700/Seita.3G175400/Seita.8G183700/Seita.9G057400/Seita.9G513500	9
black	BP	GO:0009559	embryo sac central cell differentiation	6/304	26/9983	0.000104399	0.00250751	0.00225485	Seita.1G229700/Seita.1G236300/Seita.2G417700/Seita.3G150300/Seita.3G168700/Seita.9G057400	6
black	BP	GO:0015833	peptide transport	28/304	430/9983	0.000118846	0.00280259	0.00252021	Seita.1G113100/Seita.1G143600/Seita.2G094700/Seita.2G195400/Seita.2G303500/Seita.2G389700/Seita.3G137600/Seita.3G175400/Seita.3G326600/Seita.4G114400/Seita.4G158700/Seita.4G192900/Seita.4G280600/Seita.5G391000/Seita.5G463400/Seita.6G229800/Seita.6G253600/Seita.7G165800/Seita.7G181900/Seita.7G201700/Seita.7G231000/Seita.8G198800/Seita.9G028900/Seita.9G080700/Seita.9G217100/Seita.9G231400/Seita.9G3…	28
black	BP	GO:0009553	embryo sac development	13/304	127/9983	0.000126415	0.00292787	0.00263286	Seita.1G229700/Seita.1G236300/Seita.2G417700/Seita.3G119800/Seita.3G150300/Seita.3G168700/Seita.3G392000/Seita.5G160100/Seita.5G354400/Seita.6G250100/Seita.9G057400/Seita.9G158600/Seita.9G233700	13
black	BP	GO:0072594	establishment of protein localization to organelle	18/304	225/9983	0.000174002	0.00395931	0.00356038	Seita.2G094700/Seita.2G303500/Seita.3G137600/Seita.3G175400/Seita.3G326600/Seita.4G114400/Seita.4G158700/Seita.5G391000/Seita.6G229800/Seita.7G165800/Seita.7G181900/Seita.7G201700/Seita.7G231000/Seita.8G198800/Seita.9G028900/Seita.9G080700/Seita.9G217100/Seita.9G231400	18
black	BP	GO:0046907	intracellular transport	30/304	488/9983	0.000188328	0.00421141	0.00378707	Seita.1G113100/Seita.2G081200/Seita.2G094700/Seita.2G195400/Seita.2G303500/Seita.2G389700/Seita.3G137600/Seita.3G175400/Seita.3G326600/Seita.4G114400/Seita.4G158700/Seita.4G192900/Seita.4G280600/Seita.5G391000/Seita.5G463400/Seita.6G229800/Seita.6G253600/Seita.7G165800/Seita.7G181900/Seita.7G201700/Seita.7G231000/Seita.8G198800/Seita.9G028900/Seita.9G080700/Seita.9G217100/Seita.9G231400/Seita.9G3…	30
black	BP	GO:0031167	rRNA methylation	5/304	19/9983	0.00020728	0.00455665	0.00409753	Seita.1G130800/Seita.1G356100/Seita.1G370900/Seita.2G327300/Seita.9G579800	5
black	BP	GO:0065002	intracellular protein transmembrane transport	10/304	84/9983	0.00022204	0.00479977	0.00431615	Seita.2G094700/Seita.3G326600/Seita.4G114400/Seita.4G158700/Seita.7G181900/Seita.7G201700/Seita.9G028900/Seita.9G080700/Seita.9G217100/Seita.9G231400	10
black	BP	GO:0016180	snRNA processing	4/304	11/9983	0.000234869	0.00499386	0.00449068	Seita.1G181600/Seita.3G149800/Seita.7G169800/Seita.9G006200	4
black	BP	GO:0042886	amide transport	28/304	449/9983	0.000245241	0.00513028	0.00461336	Seita.1G113100/Seita.1G143600/Seita.2G094700/Seita.2G195400/Seita.2G303500/Seita.2G389700/Seita.3G137600/Seita.3G175400/Seita.3G326600/Seita.4G114400/Seita.4G158700/Seita.4G192900/Seita.4G280600/Seita.5G391000/Seita.5G463400/Seita.6G229800/Seita.6G253600/Seita.7G165800/Seita.7G181900/Seita.7G201700/Seita.7G231000/Seita.8G198800/Seita.9G028900/Seita.9G080700/Seita.9G217100/Seita.9G231400/Seita.9G3…	28
black	BP	GO:0000478	endonucleolytic cleavage involved in rRNA processing	5/304	20/9983	0.000269537	0.00547024	0.00491906	Seita.2G389700/Seita.6G035600/Seita.9G131800/Seita.9G371600/Seita.9G407100	5
black	BP	GO:0006605	protein targeting	15/304	174/9983	0.000269927	0.00547024	0.00491906	Seita.2G094700/Seita.2G303500/Seita.3G326600/Seita.4G114400/Seita.4G158700/Seita.4G280600/Seita.5G391000/Seita.6G229800/Seita.7G181900/Seita.7G201700/Seita.8G198800/Seita.9G028900/Seita.9G080700/Seita.9G217100/Seita.9G231400	15
black	BP	GO:0006281	DNA repair	19/304	258/9983	0.000335543	0.00658081	0.00591773	Seita.1G081000/Seita.1G093000/Seita.1G207100/Seita.2G328700/Seita.3G040100/Seita.3G153300/Seita.5G211100/Seita.5G259300/Seita.5G291000/Seita.5G394500/Seita.5G400300/Seita.6G024000/Seita.7G299900/Seita.8G057700/Seita.8G062200/Seita.9G015200/Seita.9G145300/Seita.9G374500/Seita.9G529300	19
black	BP	GO:0007007	inner mitochondrial membrane organization	4/304	12/9983	0.000343888	0.00658081	0.00591773	Seita.2G094700/Seita.3G326600/Seita.9G028900/Seita.9G217100	4
black	BP	GO:0034427	nuclear-transcribed mRNA catabolic process, exonucleolytic, 3'-5'	4/304	12/9983	0.000343888	0.00658081	0.00591773	Seita.1G181600/Seita.3G149800/Seita.7G169800/Seita.9G006200	4
black	BP	GO:0071027	nuclear RNA surveillance	5/304	21/9983	0.000345023	0.00658081	0.00591773	Seita.1G181600/Seita.2G195400/Seita.3G149800/Seita.7G169800/Seita.9G006200	5
black	BP	GO:0006403	RNA localization	10/304	90/9983	0.000391747	0.00736371	0.00662175	Seita.1G236300/Seita.2G195400/Seita.2G389700/Seita.3G137600/Seita.6G253600/Seita.7G169800/Seita.7G231000/Seita.9G057400/Seita.9G371600/Seita.9G572100	10
black	BP	GO:0045047	protein targeting to ER	5/304	22/9983	0.000435471	0.00784453	0.00705413	Seita.2G303500/Seita.4G114400/Seita.4G158700/Seita.7G181900/Seita.9G080700	5
black	BP	GO:0071428	rRNA-containing ribonucleoprotein complex export from nucleus	5/304	22/9983	0.000435471	0.00784453	0.00705413	Seita.2G389700/Seita.3G137600/Seita.6G253600/Seita.7G231000/Seita.9G371600	5
black	BP	GO:0072599	establishment of protein localization to endoplasmic reticulum	5/304	22/9983	0.000435471	0.00784453	0.00705413	Seita.2G303500/Seita.4G114400/Seita.4G158700/Seita.7G181900/Seita.9G080700	5
black	BP	GO:0006613	cotranslational protein targeting to membrane	4/304	13/9983	0.000484872	0.00854019	0.00767969	Seita.4G114400/Seita.4G158700/Seita.4G280600/Seita.7G181900	4
black	BP	GO:0006626	protein targeting to mitochondrion	7/304	47/9983	0.000500427	0.00854019	0.00767969	Seita.2G094700/Seita.3G326600/Seita.7G201700/Seita.8G198800/Seita.9G028900/Seita.9G217100/Seita.9G231400	7
black	BP	GO:0070585	protein localization to mitochondrion	7/304	47/9983	0.000500427	0.00854019	0.00767969	Seita.2G094700/Seita.3G326600/Seita.7G201700/Seita.8G198800/Seita.9G028900/Seita.9G217100/Seita.9G231400	7
black	BP	GO:0072655	establishment of protein localization to mitochondrion	7/304	47/9983	0.000500427	0.00854019	0.00767969	Seita.2G094700/Seita.3G326600/Seita.7G201700/Seita.8G198800/Seita.9G028900/Seita.9G217100/Seita.9G231400	7
black	BP	GO:0071025	RNA surveillance	5/304	23/9983	0.000542701	0.00914134	0.00822027	Seita.1G181600/Seita.2G195400/Seita.3G149800/Seita.7G169800/Seita.9G006200	5
black	BP	GO:0000447	endonucleolytic cleavage in ITS1 to separate SSU-rRNA from 5.8S rRNA and LSU-rRNA from tricistronic rRNA transcript (SSU-rRNA, 5.8S rRNA, LSU-rRNA)	4/304	14/9983	0.000662637	0.0108398	0.00974761	Seita.2G389700/Seita.9G131800/Seita.9G371600/Seita.9G407100	4
black	BP	GO:0000741	karyogamy	5/304	24/9983	0.000668609	0.0108398	0.00974761	Seita.1G229700/Seita.1G236300/Seita.3G150300/Seita.3G168700/Seita.9G057400	5
black	BP	GO:0010197	polar nucleus fusion	5/304	24/9983	0.000668609	0.0108398	0.00974761	Seita.1G229700/Seita.1G236300/Seita.3G150300/Seita.3G168700/Seita.9G057400	5
black	BP	GO:0006418	tRNA aminoacylation for protein translation	6/304	37/9983	0.000795384	0.012736	0.0114527	Seita.1G329300/Seita.3G036500/Seita.3G343300/Seita.5G129000/Seita.9G490200/Seita.9G503900	6
black	BP	GO:0006612	protein targeting to membrane	5/304	26/9983	0.000984391	0.0155702	0.0140013	Seita.4G114400/Seita.4G158700/Seita.4G280600/Seita.7G181900/Seita.9G080700	5
black	BP	GO:0043038	amino acid activation	6/304	39/9983	0.00106071	0.0163779	0.0147277	Seita.1G329300/Seita.3G036500/Seita.3G343300/Seita.5G129000/Seita.9G490200/Seita.9G503900	6
black	BP	GO:0043039	tRNA aminoacylation	6/304	39/9983	0.00106071	0.0163779	0.0147277	Seita.1G329300/Seita.3G036500/Seita.3G343300/Seita.5G129000/Seita.9G490200/Seita.9G503900	6
black	BP	GO:0070972	protein localization to endoplasmic reticulum	5/304	27/9983	0.00117838	0.0179807	0.016169	Seita.2G303500/Seita.4G114400/Seita.4G158700/Seita.7G181900/Seita.9G080700	5
black	BP	GO:0030488	tRNA methylation	4/304	17/9983	0.0014657	0.0221048	0.0198775	Seita.2G240300/Seita.7G200100/Seita.9G462100/Seita.9G579800	4
black	BP	GO:0007005	mitochondrion organization	12/304	147/9983	0.00174863	0.0260687	0.0234421	Seita.1G080200/Seita.2G094700/Seita.2G440400/Seita.3G153300/Seita.3G326600/Seita.7G201700/Seita.8G198800/Seita.9G002600/Seita.9G028900/Seita.9G046200/Seita.9G217100/Seita.9G231400	12
black	BP	GO:0000479	endonucleolytic cleavage of tricistronic rRNA transcript (SSU-rRNA, 5.8S rRNA, LSU-rRNA)	4/304	18/9983	0.00183972	0.027115	0.0243829	Seita.2G389700/Seita.9G131800/Seita.9G371600/Seita.9G407100	4
black	BP	GO:0006259	DNA metabolic process	27/304	489/9983	0.00198445	0.0286607	0.0257728	Seita.1G081000/Seita.1G093000/Seita.1G207100/Seita.1G236300/Seita.2G328700/Seita.3G040100/Seita.3G149800/Seita.3G153300/Seita.4G058800/Seita.5G211100/Seita.5G259300/Seita.5G291000/Seita.5G394500/Seita.5G400300/Seita.6G024000/Seita.7G299900/Seita.8G057700/Seita.8G062200/Seita.9G000400/Seita.9G006200/Seita.9G015200/Seita.9G057400/Seita.9G104200/Seita.9G145300/Seita.9G374500/Seita.9G529300/Seita.9G5…	27
black	BP	GO:0009561	megagametogenesis	7/304	59/9983	0.00198879	0.0286607	0.0257728	Seita.1G229700/Seita.1G236300/Seita.2G417700/Seita.3G150300/Seita.3G168700/Seita.5G354400/Seita.9G057400	7
black	BP	GO:0010833	telomere maintenance via telomere lengthening	4/304	20/9983	0.00277642	0.0391415	0.0351976	Seita.1G236300/Seita.9G000400/Seita.9G057400/Seita.9G559100	4
black	BP	GO:0032543	mitochondrial translation	4/304	20/9983	0.00277642	0.0391415	0.0351976	Seita.2G143900/Seita.6G117100/Seita.8G113000/Seita.9G229000	4
black	BP	GO:0006413	translational initiation	6/304	47/9983	0.00284803	0.0392967	0.0353372	Seita.2G048400/Seita.3G071100/Seita.3G359800/Seita.5G053700/Seita.6G007200/Seita.7G065200	6
black	BP	GO:1990542	mitochondrial transmembrane transport	6/304	47/9983	0.00284803	0.0392967	0.0353372	Seita.2G094700/Seita.3G326600/Seita.7G201700/Seita.9G028900/Seita.9G217100/Seita.9G231400	6
black	BP	GO:0043414	macromolecule methylation	14/304	198/9983	0.00291336	0.0397751	0.0357674	Seita.1G130800/Seita.1G356100/Seita.1G370900/Seita.2G142600/Seita.2G240300/Seita.2G327300/Seita.3G040100/Seita.4G031000/Seita.6G087700/Seita.7G200100/Seita.9G082100/Seita.9G147700/Seita.9G462100/Seita.9G579800	14
black	BP	GO:0006402	mRNA catabolic process	9/304	99/9983	0.00313812	0.0423973	0.0381254	Seita.1G181600/Seita.1G207100/Seita.2G195400/Seita.3G149800/Seita.6G087700/Seita.7G169800/Seita.7G333600/Seita.8G020000/Seita.9G006200	9
black	BP	GO:0000956	nuclear-transcribed mRNA catabolic process	7/304	64/9983	0.00318285	0.0425584	0.0382702	Seita.1G181600/Seita.2G195400/Seita.3G149800/Seita.7G169800/Seita.7G333600/Seita.8G020000/Seita.9G006200	7
black	BP	GO:0000291	nuclear-transcribed mRNA catabolic process, exonucleolytic	4/304	21/9983	0.00334851	0.0443165	0.0398512	Seita.1G181600/Seita.3G149800/Seita.7G169800/Seita.9G006200	4
black	BP	GO:0006974	cellular response to DNA damage stimulus	19/304	317/9983	0.00378024	0.0493965	0.0444194	Seita.1G081000/Seita.1G093000/Seita.1G207100/Seita.2G328700/Seita.3G040100/Seita.3G153300/Seita.5G211100/Seita.5G259300/Seita.5G291000/Seita.5G394500/Seita.5G400300/Seita.6G024000/Seita.7G299900/Seita.8G057700/Seita.8G062200/Seita.9G015200/Seita.9G145300/Seita.9G374500/Seita.9G529300	19
black	BP	GO:0018195	peptidyl-arginine modification	3/304	11/9983	0.00384661	0.0493965	0.0444194	Seita.2G142600/Seita.4G031000/Seita.9G082100	3
black	BP	GO:0018216	peptidyl-arginine methylation	3/304	11/9983	0.00384661	0.0493965	0.0444194	Seita.2G142600/Seita.4G031000/Seita.9G082100	3
black	CC	GO:1990904	ribonucleoprotein complex	128/341	493/9955	3.61866e-82	9.1914e-80	6.74214e-80	Seita.1G002300/Seita.1G023800/Seita.1G117100/Seita.1G130800/Seita.1G166300/Seita.1G181800/Seita.1G203200/Seita.1G214900/Seita.1G231100/Seita.1G236300/Seita.1G238800/Seita.1G305100/Seita.1G344200/Seita.1G363100/Seita.1G370900/Seita.2G048400/Seita.2G059900/Seita.2G079700/Seita.2G143900/Seita.2G151200/Seita.2G267400/Seita.2G274700/Seita.2G344700/Seita.2G362700/Seita.2G378300/Seita.2G389700/Seita.2G4…	128
black	CC	GO:0044391	ribosomal subunit	84/341	163/9955	1.40066e-81	1.22397e-79	8.97813e-80	Seita.1G023800/Seita.1G117100/Seita.1G166300/Seita.1G181800/Seita.1G214900/Seita.1G231100/Seita.1G238800/Seita.1G344200/Seita.1G363100/Seita.2G048400/Seita.2G059900/Seita.2G079700/Seita.2G143900/Seita.2G151200/Seita.2G267400/Seita.2G274700/Seita.2G344700/Seita.2G362700/Seita.2G378300/Seita.2G389700/Seita.2G417700/Seita.2G417900/Seita.3G145500/Seita.3G153000/Seita.3G162800/Seita.3G185900/Seita.3G1…	84
black	CC	GO:0005840	ribosome	93/341	215/9955	1.44563e-81	1.22397e-79	8.97813e-80	Seita.1G023800/Seita.1G117100/Seita.1G166300/Seita.1G181800/Seita.1G214900/Seita.1G231100/Seita.1G238800/Seita.1G344200/Seita.1G363100/Seita.2G048400/Seita.2G059900/Seita.2G079700/Seita.2G143900/Seita.2G151200/Seita.2G267400/Seita.2G274700/Seita.2G344700/Seita.2G362700/Seita.2G378300/Seita.2G389700/Seita.2G417700/Seita.2G417900/Seita.3G119800/Seita.3G145500/Seita.3G153000/Seita.3G155500/Seita.3G1…	93
black	CC	GO:0022626	cytosolic ribosome	85/341	173/9955	3.03507e-80	1.92727e-78	1.4137e-78	Seita.1G023800/Seita.1G117100/Seita.1G166300/Seita.1G181800/Seita.1G214900/Seita.1G231100/Seita.1G238800/Seita.1G344200/Seita.1G363100/Seita.2G048400/Seita.2G059900/Seita.2G079700/Seita.2G151200/Seita.2G267400/Seita.2G274700/Seita.2G344700/Seita.2G362700/Seita.2G378300/Seita.2G389700/Seita.2G417900/Seita.3G145500/Seita.3G153000/Seita.3G155500/Seita.3G162800/Seita.3G185900/Seita.3G197300/Seita.3G2…	85
black	CC	GO:0044445	cytosolic part	88/341	199/9955	5.04807e-78	2.56442e-76	1.88107e-76	Seita.1G023800/Seita.1G117100/Seita.1G166300/Seita.1G181800/Seita.1G214900/Seita.1G231100/Seita.1G238800/Seita.1G344200/Seita.1G363100/Seita.2G048400/Seita.2G059900/Seita.2G079700/Seita.2G151200/Seita.2G267400/Seita.2G274700/Seita.2G344700/Seita.2G362700/Seita.2G378300/Seita.2G389700/Seita.2G417900/Seita.3G145500/Seita.3G153000/Seita.3G155500/Seita.3G162800/Seita.3G185900/Seita.3G197300/Seita.3G2…	88
black	CC	GO:0015934	large ribosomal subunit	51/341	93/9955	6.42736e-51	2.72091e-49	1.99586e-49	Seita.1G023800/Seita.1G117100/Seita.1G166300/Seita.1G214900/Seita.1G238800/Seita.1G344200/Seita.1G363100/Seita.2G143900/Seita.2G267400/Seita.2G274700/Seita.2G344700/Seita.2G417900/Seita.3G145500/Seita.3G153000/Seita.3G162800/Seita.3G185900/Seita.3G197300/Seita.3G217000/Seita.3G276200/Seita.3G392000/Seita.4G043000/Seita.4G177300/Seita.4G249700/Seita.5G025800/Seita.5G043000/Seita.5G119300/Seita.5G2…	51
black	CC	GO:0022625	cytosolic large ribosomal subunit	48/341	80/9955	1.37608e-50	4.99321e-49	3.66265e-49	Seita.1G023800/Seita.1G117100/Seita.1G166300/Seita.1G214900/Seita.1G238800/Seita.1G344200/Seita.1G363100/Seita.2G267400/Seita.2G274700/Seita.2G344700/Seita.2G417900/Seita.3G145500/Seita.3G153000/Seita.3G162800/Seita.3G185900/Seita.3G197300/Seita.3G217000/Seita.3G276200/Seita.4G043000/Seita.4G177300/Seita.4G249700/Seita.5G025800/Seita.5G043000/Seita.5G119300/Seita.5G288600/Seita.5G375300/Seita.5G3…	48
black	CC	GO:0005730	nucleolus	89/341	436/9955	7.15565e-46	2.27192e-44	1.66651e-44	Seita.1G002300/Seita.1G014600/Seita.1G023800/Seita.1G099300/Seita.1G130800/Seita.1G166300/Seita.1G181800/Seita.1G214900/Seita.1G215000/Seita.1G236300/Seita.1G238800/Seita.1G305100/Seita.1G356100/Seita.1G363100/Seita.1G370900/Seita.2G048400/Seita.2G079700/Seita.2G080300/Seita.2G134300/Seita.2G165700/Seita.2G267400/Seita.2G362700/Seita.2G378300/Seita.2G404800/Seita.3G025700/Seita.3G041200/Seita.3G1…	89
black	CC	GO:0042788	polysomal ribosome	39/341	58/9955	4.28899e-44	1.21045e-42	8.87896e-43	Seita.1G023800/Seita.1G117100/Seita.1G181800/Seita.1G238800/Seita.2G079700/Seita.2G267400/Seita.2G378300/Seita.2G389700/Seita.3G155500/Seita.3G197300/Seita.4G012200/Seita.4G177300/Seita.4G241800/Seita.5G043000/Seita.5G119300/Seita.5G275300/Seita.5G462400/Seita.6G017200/Seita.6G085600/Seita.6G112100/Seita.6G222100/Seita.6G224900/Seita.7G065200/Seita.7G091900/Seita.7G099000/Seita.7G166100/Seita.7G2…	39
black	CC	GO:0005844	polysome	40/341	72/9955	2.66242e-40	6.76255e-39	4.96051e-39	Seita.1G023800/Seita.1G117100/Seita.1G181800/Seita.1G238800/Seita.2G079700/Seita.2G267400/Seita.2G378300/Seita.2G389700/Seita.3G155500/Seita.3G197300/Seita.4G012200/Seita.4G177300/Seita.4G241800/Seita.5G043000/Seita.5G119300/Seita.5G275300/Seita.5G462400/Seita.6G017200/Seita.6G085600/Seita.6G112100/Seita.6G222100/Seita.6G224900/Seita.7G065200/Seita.7G091900/Seita.7G099000/Seita.7G166100/Seita.7G2…	40
black	CC	GO:0022627	cytosolic small ribosomal subunit	31/341	47/9955	8.89398e-35	2.0537e-33	1.50644e-33	Seita.1G181800/Seita.1G231100/Seita.2G048400/Seita.2G059900/Seita.2G079700/Seita.2G151200/Seita.2G362700/Seita.2G378300/Seita.2G389700/Seita.3G354500/Seita.4G012200/Seita.4G023300/Seita.4G238500/Seita.5G053700/Seita.5G462400/Seita.6G084900/Seita.7G091900/Seita.7G099000/Seita.7G157100/Seita.7G234800/Seita.7G270700/Seita.8G203800/Seita.9G044700/Seita.9G073900/Seita.9G131800/Seita.9G218400/Seita.9G3…	31
black	CC	GO:0015935	small ribosomal subunit	33/341	70/9955	3.03709e-30	6.4285e-29	4.71548e-29	Seita.1G181800/Seita.1G231100/Seita.2G048400/Seita.2G059900/Seita.2G079700/Seita.2G151200/Seita.2G362700/Seita.2G378300/Seita.2G389700/Seita.2G417700/Seita.3G354500/Seita.4G012200/Seita.4G023300/Seita.4G238500/Seita.5G053700/Seita.5G462400/Seita.6G084900/Seita.7G091900/Seita.7G099000/Seita.7G157100/Seita.7G234800/Seita.7G270700/Seita.8G203800/Seita.9G044700/Seita.9G073900/Seita.9G098800/Seita.9G1…	33
black	CC	GO:0005732	small nucleolar ribonucleoprotein complex	13/341	22/9955	2.68685e-14	5.24968e-13	3.85078e-13	Seita.1G236300/Seita.1G305100/Seita.1G370900/Seita.2G404800/Seita.4G122000/Seita.5G049800/Seita.5G057000/Seita.7G075200/Seita.8G161700/Seita.9G057400/Seita.9G158600/Seita.9G404600/Seita.9G404700	13
black	CC	GO:0030684	preribosome	15/341	55/9955	2.64865e-10	4.80541e-09	3.5249e-09	Seita.1G130800/Seita.1G370900/Seita.2G389700/Seita.4G106800/Seita.4G249700/Seita.5G049800/Seita.5G354400/Seita.6G253600/Seita.9G032900/Seita.9G158600/Seita.9G206700/Seita.9G233700/Seita.9G371600/Seita.9G404600/Seita.9G404700	15
black	CC	GO:0044452	nucleolar part	14/341	71/9955	9.62438e-08	1.62973e-06	1.19545e-06	Seita.1G099300/Seita.1G236300/Seita.1G305100/Seita.1G370900/Seita.2G404800/Seita.4G106800/Seita.4G122000/Seita.4G245900/Seita.5G057000/Seita.8G161700/Seita.9G057400/Seita.9G158600/Seita.9G404600/Seita.9G404700	14
black	CC	GO:0032040	small-subunit processome	8/341	26/9955	1.58936e-06	2.52311e-05	1.85077e-05	Seita.1G130800/Seita.1G370900/Seita.4G106800/Seita.5G049800/Seita.5G354400/Seita.9G158600/Seita.9G404600/Seita.9G404700	8
black	CC	GO:0044429	mitochondrial part	28/341	309/9955	2.40159e-06	3.58826e-05	2.63209e-05	Seita.1G143600/Seita.1G199300/Seita.2G094700/Seita.2G134300/Seita.2G143900/Seita.2G327300/Seita.2G440400/Seita.3G263000/Seita.3G326600/Seita.3G392000/Seita.4G269100/Seita.5G123100/Seita.5G170400/Seita.6G117100/Seita.6G225600/Seita.7G047900/Seita.7G201700/Seita.8G113000/Seita.8G198800/Seita.9G028900/Seita.9G046200/Seita.9G072900/Seita.9G098800/Seita.9G115000/Seita.9G217100/Seita.9G229000/Seita.9G2…	28
black	CC	GO:0098798	mitochondrial protein complex	16/341	119/9955	2.74885e-06	3.87893e-05	2.8453e-05	Seita.1G199300/Seita.2G134300/Seita.2G143900/Seita.3G326600/Seita.3G392000/Seita.5G170400/Seita.7G047900/Seita.7G201700/Seita.8G113000/Seita.8G198800/Seita.9G046200/Seita.9G072900/Seita.9G098800/Seita.9G217100/Seita.9G229000/Seita.9G508900	16
black	CC	GO:0044455	mitochondrial membrane part	13/341	108/9955	7.75759e-05	0.00103707	0.000760717	Seita.1G143600/Seita.1G199300/Seita.2G134300/Seita.3G326600/Seita.5G170400/Seita.7G047900/Seita.7G201700/Seita.8G198800/Seita.9G046200/Seita.9G072900/Seita.9G115000/Seita.9G217100/Seita.9G508900	13
black	CC	GO:0097526	spliceosomal tri-snRNP complex	5/341	15/9955	0.000103568	0.00131532	0.000964819	Seita.1G002300/Seita.3G205100/Seita.7G075200/Seita.9G473700/Seita.9G473900	5
black	CC	GO:0098800	inner mitochondrial membrane protein complex	11/341	84/9955	0.000128362	0.00155257	0.00113885	Seita.1G199300/Seita.2G134300/Seita.3G326600/Seita.5G170400/Seita.7G047900/Seita.7G201700/Seita.8G198800/Seita.9G046200/Seita.9G072900/Seita.9G217100/Seita.9G508900	11
black	CC	GO:0000177	cytoplasmic exosome (RNase complex)	4/341	10/9955	0.000241152	0.00278421	0.0020423	Seita.1G181600/Seita.3G149800/Seita.7G169800/Seita.9G006200	4
black	CC	GO:0005759	mitochondrial matrix	11/341	94/9955	0.000351785	0.00388493	0.0028497	Seita.2G143900/Seita.2G327300/Seita.2G440400/Seita.3G263000/Seita.3G392000/Seita.4G269100/Seita.6G117100/Seita.8G113000/Seita.9G098800/Seita.9G229000/Seita.9G231400	11
black	CC	GO:0030687	preribosome, large subunit precursor	5/341	21/9955	0.000592329	0.00626881	0.00459834	Seita.4G249700/Seita.6G253600/Seita.9G032900/Seita.9G206700/Seita.9G233700	5
black	CC	GO:0005740	mitochondrial envelope	18/341	224/9955	0.000681474	0.00692378	0.00507877	Seita.1G143600/Seita.1G199300/Seita.2G094700/Seita.2G134300/Seita.3G326600/Seita.5G123100/Seita.5G170400/Seita.6G225600/Seita.7G047900/Seita.7G201700/Seita.8G113000/Seita.8G198800/Seita.9G028900/Seita.9G046200/Seita.9G072900/Seita.9G115000/Seita.9G217100/Seita.9G508900	18
black	CC	GO:0005747	mitochondrial respiratory chain complex I	6/341	33/9955	0.000782059	0.00735714	0.00539666	Seita.1G199300/Seita.2G134300/Seita.5G170400/Seita.7G047900/Seita.9G072900/Seita.9G508900	6
black	CC	GO:0045271	respiratory chain complex I	6/341	33/9955	0.000782059	0.00735714	0.00539666	Seita.1G199300/Seita.2G134300/Seita.5G170400/Seita.7G047900/Seita.9G072900/Seita.9G508900	6
black	CC	GO:0005743	mitochondrial inner membrane	15/341	172/9955	0.000819762	0.00743642	0.00545481	Seita.1G143600/Seita.1G199300/Seita.2G094700/Seita.2G134300/Seita.3G326600/Seita.5G170400/Seita.7G047900/Seita.7G201700/Seita.8G113000/Seita.8G198800/Seita.9G028900/Seita.9G046200/Seita.9G072900/Seita.9G217100/Seita.9G508900	15
black	CC	GO:0030894	replisome	4/341	14/9955	0.00103084	0.00872779	0.00640207	Seita.5G394500/Seita.7G299900/Seita.8G062200/Seita.9G104200	4
black	CC	GO:0043601	nuclear replisome	4/341	14/9955	0.00103084	0.00872779	0.00640207	Seita.5G394500/Seita.7G299900/Seita.8G062200/Seita.9G104200	4
black	CC	GO:0005761	mitochondrial ribosome	5/341	24/9955	0.001137	0.0093161	0.00683361	Seita.2G143900/Seita.3G392000/Seita.8G113000/Seita.9G098800/Seita.9G229000	5
black	CC	GO:0030964	NADH dehydrogenase complex	6/341	36/9955	0.0012615	0.0100132	0.00734492	Seita.1G199300/Seita.2G134300/Seita.5G170400/Seita.7G047900/Seita.9G072900/Seita.9G508900	6
black	CC	GO:0005746	mitochondrial respiratory chain	7/341	50/9955	0.00146136	0.0112481	0.00825077	Seita.1G199300/Seita.2G134300/Seita.5G170400/Seita.7G047900/Seita.9G046200/Seita.9G072900/Seita.9G508900	7
black	CC	GO:0070469	respiratory chain	7/341	51/9955	0.00164506	0.0115883	0.00850031	Seita.1G199300/Seita.2G134300/Seita.5G170400/Seita.7G047900/Seita.9G046200/Seita.9G072900/Seita.9G508900	7
black	CC	GO:0098803	respiratory chain complex	7/341	51/9955	0.00164506	0.0115883	0.00850031	Seita.1G199300/Seita.2G134300/Seita.5G170400/Seita.7G047900/Seita.9G046200/Seita.9G072900/Seita.9G508900	7
black	CC	GO:0030686	90S preribosome	5/341	26/9955	0.00166349	0.0115883	0.00850031	Seita.2G389700/Seita.4G106800/Seita.5G049800/Seita.9G206700/Seita.9G371600	5
black	CC	GO:0097525	spliceosomal snRNP complex	6/341	38/9955	0.00168806	0.0115883	0.00850031	Seita.1G002300/Seita.3G205100/Seita.4G193100/Seita.7G075200/Seita.9G473700/Seita.9G473900	6
black	CC	GO:0031966	mitochondrial membrane	16/341	209/9955	0.00220407	0.0143472	0.0105241	Seita.1G143600/Seita.1G199300/Seita.2G094700/Seita.2G134300/Seita.3G326600/Seita.5G170400/Seita.7G047900/Seita.7G201700/Seita.8G113000/Seita.8G198800/Seita.9G028900/Seita.9G046200/Seita.9G072900/Seita.9G115000/Seita.9G217100/Seita.9G508900	16
black	CC	GO:0000178	exosome (RNase complex)	4/341	17/9955	0.0022594	0.0143472	0.0105241	Seita.1G181600/Seita.3G149800/Seita.7G169800/Seita.9G006200	4
black	CC	GO:1905354	exoribonuclease complex	4/341	17/9955	0.0022594	0.0143472	0.0105241	Seita.1G181600/Seita.3G149800/Seita.7G169800/Seita.9G006200	4
black	CC	GO:0030532	small nuclear ribonucleoprotein complex	6/341	41/9955	0.00252253	0.0156274	0.0114631	Seita.1G002300/Seita.3G205100/Seita.4G193100/Seita.7G075200/Seita.9G473700/Seita.9G473900	6
black	CC	GO:0071011	precatalytic spliceosome	5/341	29/9955	0.0027609	0.0166969	0.0122476	Seita.1G002300/Seita.4G193100/Seita.9G215000/Seita.9G473700/Seita.9G473900	5
black	CC	GO:0120114	Sm-like protein family complex	6/341	42/9955	0.00285979	0.0168927	0.0123913	Seita.1G002300/Seita.3G205100/Seita.4G193100/Seita.7G075200/Seita.9G473700/Seita.9G473900	6
black	CC	GO:0098796	membrane protein complex	20/341	304/9955	0.00395311	0.0228202	0.0167392	Seita.1G113100/Seita.1G121000/Seita.1G199300/Seita.2G134300/Seita.2G303500/Seita.3G017000/Seita.3G326600/Seita.3G332600/Seita.4G114400/Seita.5G170400/Seita.5G391000/Seita.5G463400/Seita.7G047900/Seita.7G181900/Seita.7G201700/Seita.8G198800/Seita.9G046200/Seita.9G072900/Seita.9G217100/Seita.9G508900	20
black	CC	GO:1990204	oxidoreductase complex	7/341	60/9955	0.0042214	0.0237712	0.0174368	Seita.1G199300/Seita.2G134300/Seita.5G170400/Seita.7G047900/Seita.9G046200/Seita.9G072900/Seita.9G508900	7
black	CC	GO:0000313	organellar ribosome	5/341	32/9955	0.00430503	0.0237712	0.0174368	Seita.2G143900/Seita.3G392000/Seita.8G113000/Seita.9G098800/Seita.9G229000	5
black	CC	GO:0010494	cytoplasmic stress granule	5/341	33/9955	0.00493413	0.026436	0.0193915	Seita.1G203200/Seita.4G238500/Seita.7G165800/Seita.9G200400/Seita.9G362600	5
black	CC	GO:0005758	mitochondrial intermembrane space	4/341	21/9955	0.00509985	0.026436	0.0193915	Seita.3G326600/Seita.5G123100/Seita.6G225600/Seita.9G217100	4
black	CC	GO:0031970	organelle envelope lumen	4/341	21/9955	0.00509985	0.026436	0.0193915	Seita.3G326600/Seita.5G123100/Seita.6G225600/Seita.9G217100	4
black	CC	GO:0005762	mitochondrial large ribosomal subunit	3/341	11/9955	0.00535566	0.0272067	0.0199569	Seita.2G143900/Seita.3G392000/Seita.9G229000	3
black	CC	GO:0005791	rough endoplasmic reticulum	3/341	12/9955	0.00696146	0.0346708	0.025432	Seita.1G113100/Seita.4G114400/Seita.7G181900	3
black	CC	GO:0005839	proteasome core complex	4/341	23/9955	0.00715001	0.0349251	0.0256185	Seita.4G070600/Seita.8G194300/Seita.9G066900/Seita.9G518400	4
black	CC	GO:0019866	organelle inner membrane	15/341	216/9955	0.00736158	0.03528	0.0258788	Seita.1G143600/Seita.1G199300/Seita.2G094700/Seita.2G134300/Seita.3G326600/Seita.5G170400/Seita.7G047900/Seita.7G201700/Seita.8G113000/Seita.8G198800/Seita.9G028900/Seita.9G046200/Seita.9G072900/Seita.9G217100/Seita.9G508900	15
black	CC	GO:0043596	nuclear replication fork	4/341	24/9955	0.00835261	0.0392882	0.028819	Seita.5G394500/Seita.7G299900/Seita.8G062200/Seita.9G104200	4
black	CC	GO:0046540	U4/U6 x U5 tri-snRNP complex	3/341	13/9955	0.00882291	0.0407458	0.0298881	Seita.3G205100/Seita.7G075200/Seita.9G473700	3
black	CC	GO:0005774	vacuolar membrane	26/341	466/9955	0.00969247	0.0439623	0.0322475	Seita.1G023800/Seita.1G113100/Seita.1G117100/Seita.1G238800/Seita.1G372200/Seita.2G048400/Seita.2G081200/Seita.2G267400/Seita.3G217000/Seita.4G177300/Seita.4G280600/Seita.5G053700/Seita.5G160100/Seita.5G376500/Seita.6G017200/Seita.6G224900/Seita.7G132400/Seita.7G166100/Seita.7G228400/Seita.7G273300/Seita.7G285900/Seita.7G290900/Seita.8G046000/Seita.8G067600/Seita.9G012300/Seita.9G231400	26
black	CC	GO:1905368	peptidase complex	6/341	55/9955	0.0109079	0.0479448	0.0351688	Seita.2G303500/Seita.4G070600/Seita.4G220800/Seita.8G194300/Seita.9G066900/Seita.9G518400	6
black	CC	GO:0000315	organellar large ribosomal subunit	3/341	14/9955	0.010948	0.0479448	0.0351688	Seita.2G143900/Seita.3G392000/Seita.9G229000	3
black	CC	GO:0034708	methyltransferase complex	4/341	26/9955	0.011138	0.04795	0.0351726	Seita.2G368300/Seita.3G040100/Seita.7G200100/Seita.9G000400	4
black	CC	GO:0044437	vacuolar part	26/341	473/9955	0.0116041	0.0491239	0.0360337	Seita.1G023800/Seita.1G113100/Seita.1G117100/Seita.1G238800/Seita.1G372200/Seita.2G048400/Seita.2G081200/Seita.2G267400/Seita.3G217000/Seita.4G177300/Seita.4G280600/Seita.5G053700/Seita.5G160100/Seita.5G376500/Seita.6G017200/Seita.6G224900/Seita.7G132400/Seita.7G166100/Seita.7G228400/Seita.7G273300/Seita.7G285900/Seita.7G290900/Seita.8G046000/Seita.8G067600/Seita.9G012300/Seita.9G231400	26
black	MF	GO:0003735	structural constituent of ribosome	87/269	182/8539	2.09013e-85	6.12408e-83	5.63235e-83	Seita.1G023800/Seita.1G117100/Seita.1G166300/Seita.1G181800/Seita.1G214900/Seita.1G231100/Seita.1G238800/Seita.1G344200/Seita.1G363100/Seita.2G048400/Seita.2G059900/Seita.2G079700/Seita.2G143900/Seita.2G151200/Seita.2G267400/Seita.2G274700/Seita.2G344700/Seita.2G362700/Seita.2G378300/Seita.2G389700/Seita.2G417700/Seita.2G417900/Seita.3G145500/Seita.3G150300/Seita.3G153000/Seita.3G155500/Seita.3G1…	87
black	MF	GO:0005198	structural molecule activity	88/269	250/8539	4.94931e-72	7.25074e-70	6.66854e-70	Seita.1G023800/Seita.1G100900/Seita.1G117100/Seita.1G166300/Seita.1G181800/Seita.1G214900/Seita.1G231100/Seita.1G238800/Seita.1G344200/Seita.1G363100/Seita.2G048400/Seita.2G059900/Seita.2G079700/Seita.2G143900/Seita.2G151200/Seita.2G267400/Seita.2G274700/Seita.2G344700/Seita.2G362700/Seita.2G378300/Seita.2G389700/Seita.2G417700/Seita.2G417900/Seita.3G145500/Seita.3G150300/Seita.3G153000/Seita.3G1…	88
black	MF	GO:0003729	mRNA binding	40/269	276/8539	2.0877e-16	2.03899e-14	1.87527e-14	Seita.1G023800/Seita.1G081000/Seita.1G117100/Seita.1G166300/Seita.1G181800/Seita.1G203200/Seita.1G214900/Seita.1G238800/Seita.1G257100/Seita.2G048400/Seita.2G079700/Seita.2G378300/Seita.2G389700/Seita.3G197300/Seita.5G043000/Seita.5G053700/Seita.5G301000/Seita.5G462400/Seita.6G017200/Seita.6G035600/Seita.6G087700/Seita.7G064700/Seita.7G091900/Seita.7G099000/Seita.7G132400/Seita.7G134600/Seita.7G1…	40
black	MF	GO:0030515	snoRNA binding	11/269	22/8539	1.28465e-11	9.41009e-10	8.65451e-10	Seita.1G236300/Seita.1G305100/Seita.1G370900/Seita.4G106800/Seita.4G122000/Seita.5G049800/Seita.8G161700/Seita.9G057400/Seita.9G158600/Seita.9G404600/Seita.9G404700	11
black	MF	GO:0019843	rRNA binding	13/269	58/8539	2.00241e-08	1.17341e-06	1.07919e-06	Seita.1G014600/Seita.1G130800/Seita.1G181800/Seita.1G363100/Seita.2G362700/Seita.3G186100/Seita.3G392000/Seita.6G007400/Seita.6G084900/Seita.7G091900/Seita.9G228700/Seita.9G229000/Seita.9G546200	13
black	MF	GO:0008565	protein transporter activity	8/269	43/8539	4.86139e-05	0.00237398	0.00218336	Seita.2G094700/Seita.3G326600/Seita.4G192900/Seita.7G165800/Seita.7G201700/Seita.9G028900/Seita.9G080700/Seita.9G217100	8
black	MF	GO:0008173	RNA methyltransferase activity	7/269	34/8539	7.38188e-05	0.00308984	0.00284175	Seita.1G130800/Seita.1G356100/Seita.1G370900/Seita.2G240300/Seita.2G327300/Seita.9G462100/Seita.9G579800	7
black	MF	GO:0008649	rRNA methyltransferase activity	5/269	16/8539	9.81604e-05	0.00319567	0.00293907	Seita.1G130800/Seita.1G356100/Seita.1G370900/Seita.2G327300/Seita.9G579800	5
black	MF	GO:0140102	catalytic activity, acting on a rRNA	5/269	16/8539	9.81604e-05	0.00319567	0.00293907	Seita.1G130800/Seita.1G356100/Seita.1G370900/Seita.2G327300/Seita.9G579800	5
black	MF	GO:0070181	small ribosomal subunit rRNA binding	4/269	12/8539	0.000390369	0.0114378	0.0105194	Seita.1G181800/Seita.2G362700/Seita.6G084900/Seita.7G091900	4
black	MF	GO:0140098	catalytic activity, acting on RNA	21/269	299/8539	0.000475439	0.012664	0.0116471	Seita.1G130800/Seita.1G181600/Seita.1G329300/Seita.1G356100/Seita.1G370900/Seita.2G240300/Seita.2G327300/Seita.3G149800/Seita.3G235600/Seita.3G343300/Seita.5G129000/Seita.5G394500/Seita.7G162500/Seita.7G320300/Seita.9G006200/Seita.9G104200/Seita.9G178100/Seita.9G200400/Seita.9G462100/Seita.9G503900/Seita.9G579800	21
blue	BP	GO:0042445	hormone metabolic process	105/1815	288/9983	6.93813e-14	1.69429e-10	1.60672e-10	Seita.1G030600/Seita.1G034400/Seita.1G042800/Seita.1G132800/Seita.1G166600/Seita.1G175800/Seita.1G245800/Seita.1G281300/Seita.1G345400/Seita.1G373300/Seita.2G039800/Seita.2G098400/Seita.2G098500/Seita.2G098800/Seita.2G105100/Seita.2G105200/Seita.2G144900/Seita.2G180600/Seita.2G185400/Seita.2G372300/Seita.2G390100/Seita.2G413200/Seita.2G435800/Seita.2G436000/Seita.3G046500/Seita.3G112100/Seita.3G1…	105
blue	BP	GO:0010817	regulation of hormone levels	119/1815	390/9983	1.12869e-09	1.37813e-06	1.30691e-06	Seita.1G030600/Seita.1G034400/Seita.1G042800/Seita.1G132800/Seita.1G166600/Seita.1G175800/Seita.1G240800/Seita.1G245800/Seita.1G271700/Seita.1G281300/Seita.1G287800/Seita.1G345400/Seita.1G373300/Seita.2G039800/Seita.2G098400/Seita.2G098500/Seita.2G098800/Seita.2G105100/Seita.2G105200/Seita.2G144900/Seita.2G180600/Seita.2G185400/Seita.2G372300/Seita.2G390100/Seita.2G413200/Seita.2G435800/Seita.2G4…	119
blue	BP	GO:0019748	secondary metabolic process	94/1815	305/9983	3.87119e-08	3.15115e-05	2.98828e-05	Seita.1G030600/Seita.1G040400/Seita.1G057100/Seita.1G062400/Seita.1G063900/Seita.1G089800/Seita.1G175800/Seita.1G198900/Seita.1G245800/Seita.1G270800/Seita.1G360800/Seita.1G379700/Seita.2G028200/Seita.2G033500/Seita.2G105100/Seita.2G105200/Seita.2G132800/Seita.2G140600/Seita.2G145700/Seita.2G145800/Seita.2G147600/Seita.2G180600/Seita.2G198900/Seita.2G210200/Seita.2G219700/Seita.2G278500/Seita.2G3…	94
blue	BP	GO:0090693	plant organ senescence	62/1815	178/9983	7.03104e-08	4.13345e-05	3.91982e-05	Seita.1G160600/Seita.1G166500/Seita.1G240800/Seita.1G252000/Seita.1G315600/Seita.1G379700/Seita.2G028200/Seita.2G179700/Seita.2G179800/Seita.2G180600/Seita.2G300900/Seita.2G436000/Seita.2G436400/Seita.3G008300/Seita.3G130800/Seita.3G147300/Seita.3G160800/Seita.4G017200/Seita.4G054100/Seita.4G054300/Seita.4G054900/Seita.4G055000/Seita.4G067200/Seita.4G086200/Seita.4G105900/Seita.4G106300/Seita.4G1…	62
blue	BP	GO:0010150	leaf senescence	60/1815	171/9983	8.46325e-08	4.13345e-05	3.91982e-05	Seita.1G166500/Seita.1G240800/Seita.1G252000/Seita.1G315600/Seita.1G379700/Seita.2G028200/Seita.2G179700/Seita.2G179800/Seita.2G180600/Seita.2G300900/Seita.2G436000/Seita.2G436400/Seita.3G008300/Seita.3G130800/Seita.3G160800/Seita.4G017200/Seita.4G054100/Seita.4G054300/Seita.4G054900/Seita.4G055000/Seita.4G067200/Seita.4G086200/Seita.4G105900/Seita.4G106300/Seita.4G118900/Seita.4G163600/Seita.4G1…	60
blue	BP	GO:0007568	aging	67/1815	205/9983	3.33414e-07	0.000132192	0.000125359	Seita.1G160600/Seita.1G166500/Seita.1G180300/Seita.1G240800/Seita.1G252000/Seita.1G315600/Seita.1G379700/Seita.2G028200/Seita.2G179700/Seita.2G179800/Seita.2G180600/Seita.2G300900/Seita.2G436000/Seita.2G436400/Seita.3G008300/Seita.3G130800/Seita.3G147300/Seita.3G160800/Seita.4G017200/Seita.4G054100/Seita.4G054300/Seita.4G054900/Seita.4G055000/Seita.4G067200/Seita.4G086200/Seita.4G105900/Seita.4G1…	67
blue	BP	GO:0010200	response to chitin	41/1815	105/9983	3.78927e-07	0.000132192	0.000125359	Seita.1G053800/Seita.1G067400/Seita.1G185100/Seita.1G253100/Seita.1G257300/Seita.1G257600/Seita.2G156100/Seita.2G156200/Seita.2G179700/Seita.2G179800/Seita.2G195200/Seita.2G245100/Seita.2G269700/Seita.2G351400/Seita.3G007200/Seita.3G062200/Seita.3G130800/Seita.3G143400/Seita.3G145700/Seita.3G205500/Seita.3G237600/Seita.4G067200/Seita.4G163600/Seita.4G197100/Seita.4G235200/Seita.5G208300/Seita.5G2…	41
blue	BP	GO:0042446	hormone biosynthetic process	63/1815	200/9983	3.04283e-06	0.000928825	0.00088082	Seita.1G030600/Seita.1G034400/Seita.1G175800/Seita.1G245800/Seita.1G281300/Seita.1G345400/Seita.2G039800/Seita.2G105100/Seita.2G105200/Seita.2G144900/Seita.2G180600/Seita.2G185400/Seita.2G390100/Seita.2G436000/Seita.3G112100/Seita.4G002200/Seita.4G078000/Seita.4G078100/Seita.4G078200/Seita.4G078300/Seita.4G110900/Seita.4G235500/Seita.4G235600/Seita.4G268800/Seita.5G069100/Seita.5G125800/Seita.5G1…	63
blue	BP	GO:0044550	secondary metabolite biosynthetic process	67/1815	218/9983	3.87475e-06	0.00105135	0.000997012	Seita.1G062400/Seita.1G063900/Seita.1G089800/Seita.1G360800/Seita.2G028200/Seita.2G132800/Seita.2G140600/Seita.2G145700/Seita.2G145800/Seita.2G147600/Seita.2G180600/Seita.2G198900/Seita.2G210200/Seita.2G219700/Seita.2G278500/Seita.2G435800/Seita.3G298400/Seita.3G339800/Seita.4G048400/Seita.4G181500/Seita.4G216300/Seita.4G227800/Seita.4G235500/Seita.4G235600/Seita.5G035900/Seita.5G066200/Seita.5G0…	67
blue	BP	GO:1900673	olefin metabolic process	19/1815	37/9983	4.83835e-06	0.00118153	0.00112046	Seita.1G281300/Seita.1G345400/Seita.2G180600/Seita.2G436000/Seita.3G112100/Seita.5G069100/Seita.5G125800/Seita.5G136200/Seita.5G231200/Seita.7G208700/Seita.7G239800/Seita.7G306400/Seita.8G166600/Seita.9G109200/Seita.9G117500/Seita.9G117700/Seita.9G205600/Seita.9G205700/Seita.9G417600	19
blue	BP	GO:0009692	ethylene metabolic process	17/1815	32/9983	8.4737e-06	0.00137952	0.00130822	Seita.1G281300/Seita.1G345400/Seita.2G180600/Seita.2G436000/Seita.3G112100/Seita.5G069100/Seita.5G125800/Seita.5G136200/Seita.5G231200/Seita.7G208700/Seita.7G239800/Seita.7G306400/Seita.8G166600/Seita.9G109200/Seita.9G117500/Seita.9G117700/Seita.9G417600	17
blue	BP	GO:0009693	ethylene biosynthetic process	17/1815	32/9983	8.4737e-06	0.00137952	0.00130822	Seita.1G281300/Seita.1G345400/Seita.2G180600/Seita.2G436000/Seita.3G112100/Seita.5G069100/Seita.5G125800/Seita.5G136200/Seita.5G231200/Seita.7G208700/Seita.7G239800/Seita.7G306400/Seita.8G166600/Seita.9G109200/Seita.9G117500/Seita.9G117700/Seita.9G417600	17
blue	BP	GO:0043449	cellular alkene metabolic process	17/1815	32/9983	8.4737e-06	0.00137952	0.00130822	Seita.1G281300/Seita.1G345400/Seita.2G180600/Seita.2G436000/Seita.3G112100/Seita.5G069100/Seita.5G125800/Seita.5G136200/Seita.5G231200/Seita.7G208700/Seita.7G239800/Seita.7G306400/Seita.8G166600/Seita.9G109200/Seita.9G117500/Seita.9G117700/Seita.9G417600	17
blue	BP	GO:0043450	alkene biosynthetic process	17/1815	32/9983	8.4737e-06	0.00137952	0.00130822	Seita.1G281300/Seita.1G345400/Seita.2G180600/Seita.2G436000/Seita.3G112100/Seita.5G069100/Seita.5G125800/Seita.5G136200/Seita.5G231200/Seita.7G208700/Seita.7G239800/Seita.7G306400/Seita.8G166600/Seita.9G109200/Seita.9G117500/Seita.9G117700/Seita.9G417600	17
blue	BP	GO:1900674	olefin biosynthetic process	17/1815	32/9983	8.4737e-06	0.00137952	0.00130822	Seita.1G281300/Seita.1G345400/Seita.2G180600/Seita.2G436000/Seita.3G112100/Seita.5G069100/Seita.5G125800/Seita.5G136200/Seita.5G231200/Seita.7G208700/Seita.7G239800/Seita.7G306400/Seita.8G166600/Seita.9G109200/Seita.9G117500/Seita.9G117700/Seita.9G417600	17
blue	BP	GO:0043901	negative regulation of multi-organism process	15/1815	27/9983	1.4178e-05	0.00216392	0.00205208	Seita.1G102100/Seita.1G141400/Seita.1G370000/Seita.2G111700/Seita.2G137500/Seita.2G365800/Seita.3G046500/Seita.3G344800/Seita.6G252900/Seita.7G327100/Seita.7G333100/Seita.9G127600/Seita.9G127700/Seita.9G206800/Seita.9G405000	15
blue	BP	GO:0002831	regulation of response to biotic stimulus	38/1815	108/9983	1.80046e-05	0.00258631	0.00245264	Seita.1G102100/Seita.1G138300/Seita.1G141400/Seita.1G190700/Seita.1G335000/Seita.1G370000/Seita.2G111700/Seita.2G137500/Seita.2G365800/Seita.2G434600/Seita.3G046500/Seita.3G344800/Seita.4G136700/Seita.4G151200/Seita.4G151300/Seita.4G197100/Seita.4G252000/Seita.5G205500/Seita.6G011600/Seita.6G011900/Seita.6G012200/Seita.6G055400/Seita.6G125000/Seita.6G252900/Seita.7G327100/Seita.7G333100/Seita.8G1…	38
blue	BP	GO:0015893	drug transport	40/1815	117/9983	2.3739e-05	0.00322059	0.00305414	Seita.1G003300/Seita.1G045300/Seita.1G131000/Seita.1G131200/Seita.1G131500/Seita.1G270500/Seita.2G001400/Seita.2G238600/Seita.2G238700/Seita.2G278500/Seita.2G324100/Seita.2G335300/Seita.3G103500/Seita.3G356200/Seita.3G357100/Seita.4G006600/Seita.4G145800/Seita.4G181500/Seita.4G183800/Seita.5G015100/Seita.5G274100/Seita.5G302300/Seita.5G333100/Seita.6G098800/Seita.7G039900/Seita.7G043900/Seita.7G2…	40
blue	BP	GO:0009850	auxin metabolic process	24/1815	58/9983	3.17473e-05	0.00403512	0.00382657	Seita.1G245800/Seita.2G098400/Seita.2G098500/Seita.2G098800/Seita.2G105100/Seita.2G105200/Seita.3G131500/Seita.3G170100/Seita.3G179300/Seita.5G125800/Seita.5G156700/Seita.5G205500/Seita.5G321300/Seita.6G072900/Seita.7G126900/Seita.7G135700/Seita.7G239800/Seita.9G020900/Seita.9G047100/Seita.9G061300/Seita.9G061500/Seita.9G061600/Seita.9G183500/Seita.J031600	24
blue	BP	GO:0009611	response to wounding	72/1815	253/9983	3.30477e-05	0.00403512	0.00382657	Seita.1G132800/Seita.1G138300/Seita.1G192600/Seita.1G218500/Seita.1G218600/Seita.1G219700/Seita.1G240800/Seita.1G253500/Seita.1G257800/Seita.1G343100/Seita.1G343200/Seita.2G034500/Seita.2G116600/Seita.2G132800/Seita.2G180600/Seita.2G200400/Seita.2G240500/Seita.2G278500/Seita.2G335400/Seita.2G351400/Seita.2G388400/Seita.3G009100/Seita.3G083900/Seita.3G166100/Seita.4G002200/Seita.4G021300/Seita.4G0…	72
blue	BP	GO:0006855	drug transmembrane transport	39/1815	115/9983	3.67776e-05	0.00427671	0.00405568	Seita.1G003300/Seita.1G045300/Seita.1G131000/Seita.1G131200/Seita.1G131500/Seita.1G270500/Seita.2G001400/Seita.2G238600/Seita.2G238700/Seita.2G278500/Seita.2G324100/Seita.2G335300/Seita.3G103500/Seita.3G356200/Seita.3G357100/Seita.4G006600/Seita.4G145800/Seita.4G181500/Seita.4G183800/Seita.5G015100/Seita.5G274100/Seita.5G302300/Seita.5G333100/Seita.7G039900/Seita.7G043900/Seita.7G204900/Seita.7G3…	39
blue	BP	GO:0032101	regulation of response to external stimulus	41/1815	124/9983	4.58355e-05	0.00503392	0.00477375	Seita.1G102100/Seita.1G138300/Seita.1G141400/Seita.1G190700/Seita.1G335000/Seita.1G370000/Seita.2G046700/Seita.2G111700/Seita.2G137500/Seita.2G365800/Seita.2G434600/Seita.3G046500/Seita.3G344800/Seita.4G136700/Seita.4G151200/Seita.4G151300/Seita.4G197100/Seita.4G222700/Seita.4G252000/Seita.5G205500/Seita.6G011600/Seita.6G011900/Seita.6G012200/Seita.6G055400/Seita.6G125000/Seita.6G252900/Seita.7G3…	41
blue	BP	GO:0009969	xyloglucan biosynthetic process	10/1815	15/9983	4.7412e-05	0.00503392	0.00477375	Seita.1G123400/Seita.1G123500/Seita.4G081200/Seita.4G081800/Seita.7G206700/Seita.7G321700/Seita.8G032300/Seita.8G032400/Seita.9G430600/Seita.9G430700	10
blue	BP	GO:0009814	defense response, incompatible interaction	53/1815	176/9983	7.1075e-05	0.00723188	0.00685812	Seita.1G132800/Seita.1G138300/Seita.1G141400/Seita.1G240800/Seita.1G281300/Seita.1G345400/Seita.2G179700/Seita.2G179800/Seita.2G180600/Seita.2G185400/Seita.2G269700/Seita.2G438700/Seita.3G046500/Seita.3G175800/Seita.4G067200/Seita.4G083000/Seita.4G118900/Seita.4G136700/Seita.4G181500/Seita.4G189800/Seita.4G252000/Seita.5G066200/Seita.5G066300/Seita.5G066400/Seita.5G205500/Seita.5G231200/Seita.5G2…	53
blue	BP	GO:0002832	negative regulation of response to biotic stimulus	13/1815	24/9983	7.65925e-05	0.00748156	0.00709489	Seita.1G102100/Seita.1G141400/Seita.1G370000/Seita.2G111700/Seita.2G137500/Seita.3G046500/Seita.3G344800/Seita.6G252900/Seita.7G327100/Seita.7G333100/Seita.9G127600/Seita.9G127700/Seita.9G405000	13
blue	BP	GO:1901615	organic hydroxy compound metabolic process	75/1815	275/9983	0.000106543	0.0100069	0.0094897	Seita.1G033100/Seita.1G033200/Seita.1G042800/Seita.1G099200/Seita.1G102500/Seita.1G132800/Seita.1G157400/Seita.1G166600/Seita.1G271700/Seita.1G294900/Seita.1G351000/Seita.1G373300/Seita.1G379700/Seita.2G035400/Seita.2G039800/Seita.2G105100/Seita.2G105200/Seita.2G119200/Seita.2G185400/Seita.2G245100/Seita.2G300900/Seita.2G413200/Seita.2G435800/Seita.3G015800/Seita.3G046500/Seita.3G131500/Seita.3G1…	75
blue	BP	GO:0010411	xyloglucan metabolic process	14/1815	28/9983	0.000127206	0.0115051	0.0109104	Seita.1G123400/Seita.1G123500/Seita.4G081200/Seita.4G081800/Seita.4G102800/Seita.4G103000/Seita.4G103100/Seita.4G103300/Seita.7G206700/Seita.7G321700/Seita.8G032300/Seita.8G032400/Seita.9G430600/Seita.9G430700	14
blue	BP	GO:0031347	regulation of defense response	73/1815	269/9983	0.000154935	0.0135126	0.0128142	Seita.1G102100/Seita.1G138300/Seita.1G141400/Seita.1G190700/Seita.1G240800/Seita.1G257300/Seita.1G335000/Seita.1G370000/Seita.2G034500/Seita.2G111700/Seita.2G137500/Seita.2G156200/Seita.2G179700/Seita.2G179800/Seita.2G185400/Seita.2G200400/Seita.2G269700/Seita.2G315700/Seita.2G365800/Seita.2G388400/Seita.2G389600/Seita.2G434600/Seita.3G046500/Seita.3G327700/Seita.3G344800/Seita.4G067200/Seita.4G0…	73
blue	BP	GO:0071241	cellular response to inorganic substance	31/1815	90/9983	0.000162402	0.0136753	0.0129685	Seita.1G034400/Seita.1G114900/Seita.1G115400/Seita.1G115700/Seita.1G115800/Seita.1G116000/Seita.1G116100/Seita.1G240800/Seita.1G257200/Seita.2G077200/Seita.2G219700/Seita.2G253900/Seita.2G280700/Seita.2G280900/Seita.2G390100/Seita.3G032300/Seita.3G368800/Seita.4G002600/Seita.4G192600/Seita.5G005900/Seita.5G429300/Seita.7G069900/Seita.7G070000/Seita.7G232900/Seita.9G109200/Seita.9G127300/Seita.9G1…	31
blue	BP	GO:0009620	response to fungus	94/1815	367/9983	0.000193593	0.0152771	0.0144875	Seita.1G043600/Seita.1G091800/Seita.1G132800/Seita.1G174100/Seita.1G190700/Seita.1G212900/Seita.1G226000/Seita.1G240800/Seita.1G257600/Seita.1G270800/Seita.1G307800/Seita.1G335000/Seita.1G370000/Seita.2G089900/Seita.2G090100/Seita.2G111700/Seita.2G134400/Seita.2G137500/Seita.2G152900/Seita.2G156100/Seita.2G164200/Seita.2G180600/Seita.2G185400/Seita.2G200500/Seita.2G269700/Seita.2G365800/Seita.2G4…	94
blue	BP	GO:0009617	response to bacterium	100/1815	395/9983	0.000194686	0.0152771	0.0144875	Seita.1G004600/Seita.1G102100/Seita.1G138300/Seita.1G173200/Seita.1G240800/Seita.1G257300/Seita.1G370000/Seita.2G111700/Seita.2G134400/Seita.2G137500/Seita.2G156200/Seita.2G179700/Seita.2G179800/Seita.2G180600/Seita.2G185400/Seita.2G201600/Seita.2G253800/Seita.2G269700/Seita.2G283600/Seita.2G389600/Seita.2G420700/Seita.2G438700/Seita.3G009100/Seita.3G130800/Seita.3G175800/Seita.3G280100/Seita.3G3…	100
blue	BP	GO:0009308	amine metabolic process	33/1815	99/9983	0.000206063	0.0152771	0.0144875	Seita.1G281300/Seita.1G345400/Seita.2G293400/Seita.2G293500/Seita.2G436000/Seita.3G356600/Seita.4G021300/Seita.5G069100/Seita.5G125800/Seita.5G208900/Seita.5G231200/Seita.5G276100/Seita.5G337500/Seita.6G072900/Seita.6G073000/Seita.7G004600/Seita.7G126900/Seita.7G139300/Seita.7G154100/Seita.7G154200/Seita.7G194200/Seita.7G194300/Seita.7G194800/Seita.7G194900/Seita.7G286000/Seita.7G306400/Seita.8G1…	33
blue	BP	GO:0010243	response to organonitrogen compound	64/1815	231/9983	0.000206447	0.0152771	0.0144875	Seita.1G053800/Seita.1G067400/Seita.1G185100/Seita.1G239600/Seita.1G253100/Seita.1G257300/Seita.1G257600/Seita.2G156100/Seita.2G156200/Seita.2G179700/Seita.2G179800/Seita.2G195200/Seita.2G200500/Seita.2G245100/Seita.2G269700/Seita.2G335400/Seita.2G351400/Seita.2G387700/Seita.2G401800/Seita.3G007200/Seita.3G062200/Seita.3G130800/Seita.3G131500/Seita.3G143400/Seita.3G145700/Seita.3G170100/Seita.3G2…	64
blue	BP	GO:0009415	response to water	89/1815	347/9983	0.000270214	0.0194077	0.0184046	Seita.1G081400/Seita.1G170400/Seita.1G177700/Seita.1G185100/Seita.1G190700/Seita.1G270500/Seita.1G331600/Seita.2G032200/Seita.2G033500/Seita.2G035400/Seita.2G049100/Seita.2G142500/Seita.2G196900/Seita.2G252300/Seita.2G419200/Seita.2G420700/Seita.2G435800/Seita.2G436000/Seita.3G007200/Seita.3G036300/Seita.3G046500/Seita.3G089200/Seita.3G144000/Seita.3G237600/Seita.3G242400/Seita.4G070400/Seita.4G0…	89
blue	BP	GO:0006098	pentose-phosphate shunt	8/1815	12/9983	0.000289878	0.0201039	0.0190648	Seita.1G221400/Seita.2G265900/Seita.2G283600/Seita.4G038800/Seita.7G029700/Seita.7G143800/Seita.8G121700/Seita.9G363900	8
blue	BP	GO:0002237	response to molecule of bacterial origin	17/1815	40/9983	0.000304361	0.0201039	0.0190648	Seita.1G173200/Seita.1G240800/Seita.2G253800/Seita.2G269700/Seita.4G192600/Seita.5G005900/Seita.5G280500/Seita.6G125000/Seita.6G219800/Seita.6G227400/Seita.6G232500/Seita.7G079900/Seita.7G133900/Seita.7G262100/Seita.8G034600/Seita.9G127300/Seita.9G483300	17
blue	BP	GO:0032350	regulation of hormone metabolic process	22/1815	58/9983	0.000304604	0.0201039	0.0190648	Seita.1G030600/Seita.1G175800/Seita.1G281300/Seita.1G345400/Seita.2G372300/Seita.2G436000/Seita.3G046500/Seita.4G268800/Seita.5G069100/Seita.5G125800/Seita.5G156700/Seita.5G231200/Seita.5G317800/Seita.6G125000/Seita.7G126900/Seita.7G239800/Seita.7G306400/Seita.7G327100/Seita.7G333100/Seita.8G166600/Seita.9G417600/Seita.J031600	22
blue	BP	GO:0071369	cellular response to ethylene stimulus	33/1815	101/9983	0.000313469	0.0201445	0.0191034	Seita.1G034400/Seita.1G081400/Seita.1G174700/Seita.1G240800/Seita.1G257300/Seita.1G257600/Seita.2G091700/Seita.2G156100/Seita.2G156200/Seita.2G180600/Seita.2G219700/Seita.2G253900/Seita.2G390100/Seita.3G032300/Seita.3G145700/Seita.3G192000/Seita.4G092200/Seita.4G192600/Seita.4G252600/Seita.5G380100/Seita.7G069900/Seita.7G070000/Seita.7G186400/Seita.7G232900/Seita.7G267600/Seita.8G150800/Seita.9G1…	33
blue	BP	GO:0048366	leaf development	96/1815	382/9983	0.00034263	0.0214539	0.0203451	Seita.1G077900/Seita.1G166500/Seita.1G240800/Seita.1G252000/Seita.1G280300/Seita.1G315600/Seita.1G346200/Seita.1G379700/Seita.2G028200/Seita.2G164200/Seita.2G173700/Seita.2G179700/Seita.2G179800/Seita.2G180600/Seita.2G235700/Seita.2G240500/Seita.2G254300/Seita.2G300900/Seita.2G372300/Seita.2G436000/Seita.2G436400/Seita.3G008300/Seita.3G130800/Seita.3G160800/Seita.3G270800/Seita.3G280000/Seita.3G3…	96
blue	BP	GO:0080167	response to karrikin	41/1815	136/9983	0.000438016	0.0267409	0.0253588	Seita.1G057100/Seita.1G114900/Seita.1G115400/Seita.1G115700/Seita.1G115800/Seita.1G116000/Seita.1G116100/Seita.1G253100/Seita.2G033500/Seita.2G245100/Seita.2G270500/Seita.2G435800/Seita.3G089200/Seita.3G103400/Seita.3G108800/Seita.3G155700/Seita.3G170100/Seita.3G219800/Seita.3G270000/Seita.3G393100/Seita.3G406500/Seita.4G021300/Seita.4G086200/Seita.4G096400/Seita.4G121900/Seita.4G184900/Seita.5G2…	41
blue	BP	GO:1901698	response to nitrogen compound	90/1815	357/9983	0.000464859	0.027057	0.0256586	Seita.1G053800/Seita.1G067400/Seita.1G107000/Seita.1G114900/Seita.1G115400/Seita.1G115700/Seita.1G115800/Seita.1G116000/Seita.1G116100/Seita.1G185100/Seita.1G218500/Seita.1G218600/Seita.1G219700/Seita.1G239600/Seita.1G245800/Seita.1G253100/Seita.1G257200/Seita.1G257300/Seita.1G257600/Seita.2G156100/Seita.2G156200/Seita.2G179700/Seita.2G179800/Seita.2G195200/Seita.2G200500/Seita.2G219700/Seita.2G2…	90
blue	BP	GO:0009051	pentose-phosphate shunt, oxidative branch	7/1815	10/9983	0.000465727	0.027057	0.0256586	Seita.1G221400/Seita.2G283600/Seita.4G038800/Seita.7G029700/Seita.7G143800/Seita.8G121700/Seita.9G363900	7
blue	BP	GO:0015706	nitrate transport	14/1815	31/9983	0.000487513	0.027057	0.0256586	Seita.1G114900/Seita.1G115400/Seita.1G115700/Seita.1G115800/Seita.1G116000/Seita.1G116100/Seita.1G218500/Seita.1G218600/Seita.1G257200/Seita.3G300700/Seita.3G406500/Seita.5G286900/Seita.6G058300/Seita.9G101800	14
blue	BP	GO:0032102	negative regulation of response to external stimulus	14/1815	31/9983	0.000487513	0.027057	0.0256586	Seita.1G102100/Seita.1G141400/Seita.1G370000/Seita.2G111700/Seita.2G137500/Seita.3G046500/Seita.3G344800/Seita.6G252900/Seita.7G327100/Seita.7G333100/Seita.9G127600/Seita.9G127700/Seita.9G206800/Seita.9G405000	14
blue	BP	GO:0062012	regulation of small molecule metabolic process	31/1815	96/9983	0.000590434	0.0320409	0.0303849	Seita.1G030600/Seita.1G102500/Seita.1G175800/Seita.1G281300/Seita.1G345400/Seita.1G351000/Seita.1G379700/Seita.2G187800/Seita.2G187900/Seita.2G300900/Seita.2G436000/Seita.3G015800/Seita.3G046500/Seita.3G165200/Seita.4G268800/Seita.5G069100/Seita.5G125800/Seita.5G231200/Seita.5G317800/Seita.6G125000/Seita.6G254000/Seita.7G306400/Seita.7G313200/Seita.7G327100/Seita.7G333100/Seita.8G005700/Seita.8G1…	31
blue	BP	GO:0042537	benzene-containing compound metabolic process	20/1815	53/9983	0.000610805	0.0324258	0.0307499	Seita.1G132800/Seita.2G033500/Seita.2G185400/Seita.2G435800/Seita.3G046500/Seita.4G110900/Seita.4G226900/Seita.5G317800/Seita.5G344200/Seita.5G434700/Seita.6G011600/Seita.6G011900/Seita.6G012200/Seita.6G125000/Seita.7G168500/Seita.7G318900/Seita.7G327100/Seita.7G333100/Seita.9G157600/Seita.9G216200	20
blue	BP	GO:0046886	positive regulation of hormone biosynthetic process	8/1815	13/9983	0.000633496	0.0326204	0.0309344	Seita.1G175800/Seita.1G281300/Seita.1G345400/Seita.2G436000/Seita.5G069100/Seita.5G231200/Seita.7G306400/Seita.9G417600	8
blue	BP	GO:0050832	defense response to fungus	76/1815	295/9983	0.000641186	0.0326204	0.0309344	Seita.1G043600/Seita.1G091800/Seita.1G132800/Seita.1G174100/Seita.1G190700/Seita.1G226000/Seita.1G240800/Seita.1G257600/Seita.1G270800/Seita.1G307800/Seita.1G335000/Seita.1G370000/Seita.2G089900/Seita.2G090100/Seita.2G111700/Seita.2G134400/Seita.2G137500/Seita.2G152900/Seita.2G156100/Seita.2G185400/Seita.2G200500/Seita.2G269700/Seita.2G365800/Seita.2G434600/Seita.3G175800/Seita.3G228500/Seita.3G2…	76
blue	BP	GO:0009723	response to ethylene	55/1815	201/9983	0.000775377	0.0386423	0.0366451	Seita.1G034400/Seita.1G081400/Seita.1G174700/Seita.1G240800/Seita.1G257300/Seita.1G257600/Seita.1G273600/Seita.2G077200/Seita.2G091700/Seita.2G156100/Seita.2G156200/Seita.2G180600/Seita.2G219700/Seita.2G253900/Seita.2G280700/Seita.2G280900/Seita.2G351400/Seita.2G390100/Seita.3G032300/Seita.3G062200/Seita.3G145700/Seita.3G192000/Seita.3G368800/Seita.4G040100/Seita.4G092200/Seita.4G189600/Seita.4G1…	55
blue	BP	GO:0032787	monocarboxylic acid metabolic process	100/1815	411/9983	0.0008674	0.0417134	0.0395576	Seita.1G106400/Seita.1G121600/Seita.1G132800/Seita.1G211000/Seita.1G245800/Seita.1G339600/Seita.1G379700/Seita.2G035400/Seita.2G105100/Seita.2G105200/Seita.2G119200/Seita.2G185400/Seita.2G187800/Seita.2G187900/Seita.2G245100/Seita.2G264600/Seita.2G268300/Seita.2G300900/Seita.2G339000/Seita.2G386500/Seita.2G435800/Seita.3G015800/Seita.3G046500/Seita.3G109600/Seita.3G111200/Seita.3G112100/Seita.3G1…	100
blue	BP	GO:0009414	response to water deprivation	85/1815	340/9983	0.000871165	0.0417134	0.0395576	Seita.1G081400/Seita.1G170400/Seita.1G177700/Seita.1G185100/Seita.1G190700/Seita.1G270500/Seita.1G331600/Seita.2G032200/Seita.2G033500/Seita.2G035400/Seita.2G049100/Seita.2G142500/Seita.2G196900/Seita.2G252300/Seita.2G419200/Seita.2G420700/Seita.2G435800/Seita.3G007200/Seita.3G036300/Seita.3G046500/Seita.3G089200/Seita.3G144000/Seita.3G237600/Seita.3G242400/Seita.4G070400/Seita.4G092200/Seita.4G0…	85
blue	BP	GO:0006066	alcohol metabolic process	34/1815	111/9983	0.00095644	0.0446831	0.0423738	Seita.1G102500/Seita.1G157400/Seita.1G351000/Seita.1G379700/Seita.2G035400/Seita.2G105100/Seita.2G105200/Seita.2G245100/Seita.2G300900/Seita.3G015800/Seita.3G131500/Seita.3G165900/Seita.4G266600/Seita.5G340800/Seita.5G341000/Seita.5G377200/Seita.5G438700/Seita.6G067400/Seita.6G217000/Seita.7G004600/Seita.7G116800/Seita.7G207500/Seita.7G262100/Seita.7G286000/Seita.7G334700/Seita.9G021400/Seita.9G0…	34
blue	BP	GO:0010268	brassinosteroid homeostasis	12/1815	26/9983	0.000969782	0.0446831	0.0423738	Seita.1G042800/Seita.1G166600/Seita.1G373300/Seita.2G413200/Seita.3G201500/Seita.3G247600/Seita.4G224700/Seita.7G204200/Seita.7G318000/Seita.8G166500/Seita.9G021400/Seita.9G173500	12
blue	BP	GO:0009694	jasmonic acid metabolic process	16/1815	40/9983	0.00101422	0.0450475	0.0427193	Seita.4G002200/Seita.4G078000/Seita.4G078100/Seita.4G078200/Seita.4G078300/Seita.4G252000/Seita.4G268800/Seita.5G066200/Seita.5G066300/Seita.5G066400/Seita.5G416000/Seita.7G174200/Seita.7G174300/Seita.8G107800/Seita.9G184200/Seita.9G552000	16
blue	BP	GO:0033240	positive regulation of cellular amine metabolic process	7/1815	11/9983	0.00107948	0.0450475	0.0427193	Seita.1G281300/Seita.1G345400/Seita.2G436000/Seita.5G069100/Seita.5G231200/Seita.7G306400/Seita.9G417600	7
blue	BP	GO:0045764	positive regulation of cellular amino acid metabolic process	7/1815	11/9983	0.00107948	0.0450475	0.0427193	Seita.1G281300/Seita.1G345400/Seita.2G436000/Seita.5G069100/Seita.5G231200/Seita.7G306400/Seita.9G417600	7
blue	BP	GO:0016143	S-glycoside metabolic process	21/1815	59/9983	0.00109888	0.0450475	0.0427193	Seita.1G063900/Seita.1G245800/Seita.1G270800/Seita.2G105100/Seita.2G105200/Seita.2G210200/Seita.2G278500/Seita.4G181500/Seita.5G035900/Seita.5G066200/Seita.5G066300/Seita.5G066400/Seita.5G146200/Seita.5G302300/Seita.7G174200/Seita.7G174300/Seita.8G060900/Seita.9G061300/Seita.9G061500/Seita.9G061600/Seita.9G183500	21
blue	BP	GO:0019757	glycosinolate metabolic process	21/1815	59/9983	0.00109888	0.0450475	0.0427193	Seita.1G063900/Seita.1G245800/Seita.1G270800/Seita.2G105100/Seita.2G105200/Seita.2G210200/Seita.2G278500/Seita.4G181500/Seita.5G035900/Seita.5G066200/Seita.5G066300/Seita.5G066400/Seita.5G146200/Seita.5G302300/Seita.7G174200/Seita.7G174300/Seita.8G060900/Seita.9G061300/Seita.9G061500/Seita.9G061600/Seita.9G183500	21
blue	BP	GO:0019760	glucosinolate metabolic process	21/1815	59/9983	0.00109888	0.0450475	0.0427193	Seita.1G063900/Seita.1G245800/Seita.1G270800/Seita.2G105100/Seita.2G105200/Seita.2G210200/Seita.2G278500/Seita.4G181500/Seita.5G035900/Seita.5G066200/Seita.5G066300/Seita.5G066400/Seita.5G146200/Seita.5G302300/Seita.7G174200/Seita.7G174300/Seita.8G060900/Seita.9G061300/Seita.9G061500/Seita.9G061600/Seita.9G183500	21
blue	BP	GO:0009873	ethylene-activated signaling pathway	29/1815	91/9983	0.00110682	0.0450475	0.0427193	Seita.1G034400/Seita.1G081400/Seita.1G174700/Seita.1G240800/Seita.1G257300/Seita.1G257600/Seita.2G091700/Seita.2G156100/Seita.2G156200/Seita.2G180600/Seita.2G253900/Seita.2G390100/Seita.3G145700/Seita.3G192000/Seita.4G092200/Seita.4G192600/Seita.4G252600/Seita.5G380100/Seita.7G186400/Seita.7G232900/Seita.7G267600/Seita.8G150800/Seita.9G117500/Seita.9G117700/Seita.9G127300/Seita.9G320700/Seita.9G4…	29
blue	BP	GO:0009838	abscission	17/1815	44/9983	0.00113148	0.0452964	0.0429554	Seita.1G030600/Seita.1G112100/Seita.1G160600/Seita.1G267800/Seita.1G281300/Seita.1G345400/Seita.2G180600/Seita.2G412200/Seita.3G147300/Seita.5G231200/Seita.7G028400/Seita.7G199600/Seita.9G117500/Seita.9G117700/Seita.9G388000/Seita.9G388100/Seita.9G553100	17
blue	BP	GO:0009627	systemic acquired resistance	23/1815	67/9983	0.00115153	0.0453554	0.0430113	Seita.1G132800/Seita.1G141400/Seita.2G180600/Seita.2G185400/Seita.2G438700/Seita.3G046500/Seita.4G181500/Seita.4G252000/Seita.5G205500/Seita.5G302300/Seita.5G344200/Seita.5G353800/Seita.6G125000/Seita.7G327100/Seita.7G333100/Seita.8G133500/Seita.9G117500/Seita.9G117700/Seita.9G183500/Seita.9G344000/Seita.9G483200/Seita.9G506400/Seita.9G517400	23
blue	BP	GO:0010364	regulation of ethylene biosynthetic process	9/1815	17/9983	0.00126455	0.0467883	0.0443701	Seita.1G281300/Seita.1G345400/Seita.2G436000/Seita.5G069100/Seita.5G125800/Seita.5G231200/Seita.7G306400/Seita.8G166600/Seita.9G417600	9
blue	BP	GO:0031335	regulation of sulfur amino acid metabolic process	9/1815	17/9983	0.00126455	0.0467883	0.0443701	Seita.1G281300/Seita.1G345400/Seita.2G436000/Seita.5G069100/Seita.5G125800/Seita.5G231200/Seita.7G306400/Seita.8G166600/Seita.9G417600	9
blue	BP	GO:1900908	regulation of olefin metabolic process	9/1815	17/9983	0.00126455	0.0467883	0.0443701	Seita.1G281300/Seita.1G345400/Seita.2G436000/Seita.5G069100/Seita.5G125800/Seita.5G231200/Seita.7G306400/Seita.8G166600/Seita.9G417600	9
blue	BP	GO:1900911	regulation of olefin biosynthetic process	9/1815	17/9983	0.00126455	0.0467883	0.0443701	Seita.1G281300/Seita.1G345400/Seita.2G436000/Seita.5G069100/Seita.5G125800/Seita.5G231200/Seita.7G306400/Seita.8G166600/Seita.9G417600	9
blue	CC	GO:0031012	extracellular matrix	20/1673	24/9955	1.56571e-12	5.58957e-10	5.55414e-10	Seita.1G162600/Seita.1G162700/Seita.1G162800/Seita.6G037400/Seita.6G037500/Seita.6G038000/Seita.6G038100/Seita.6G038200/Seita.6G038300/Seita.6G038400/Seita.6G038500/Seita.6G038600/Seita.6G038700/Seita.6G038800/Seita.6G038900/Seita.6G039000/Seita.6G039100/Seita.6G039200/Seita.6G196900/Seita.9G463100	20
blue	CC	GO:0000325	plant-type vacuole	67/1673	214/9955	9.64704e-08	1.722e-05	1.71108e-05	Seita.1G004600/Seita.1G068300/Seita.1G114900/Seita.1G115400/Seita.1G115700/Seita.1G115800/Seita.1G116000/Seita.1G116100/Seita.1G160600/Seita.1G162600/Seita.1G162700/Seita.1G162800/Seita.1G192800/Seita.1G259800/Seita.1G267700/Seita.1G271500/Seita.2G412200/Seita.3G034000/Seita.3G089200/Seita.3G120500/Seita.3G147300/Seita.3G214700/Seita.3G267500/Seita.3G300700/Seita.4G018900/Seita.4G281800/Seita.5G0…	67
blue	CC	GO:0044437	vacuolar part	108/1673	473/9955	0.000330606	0.0393421	0.0390927	Seita.1G068300/Seita.1G114900/Seita.1G115400/Seita.1G115700/Seita.1G115800/Seita.1G116000/Seita.1G116100/Seita.1G131000/Seita.1G131200/Seita.1G131500/Seita.1G160600/Seita.1G192800/Seita.1G259800/Seita.1G263600/Seita.1G267700/Seita.1G271500/Seita.1G343100/Seita.1G343200/Seita.1G373800/Seita.2G031800/Seita.2G033500/Seita.2G090300/Seita.2G091700/Seita.2G200500/Seita.2G269700/Seita.2G283600/Seita.2G3…	108
blue	MF	GO:0004497	monooxygenase activity	56/1579	167/8539	2.04778e-06	0.00125119	0.00119633	Seita.1G033100/Seita.1G033200/Seita.1G042800/Seita.1G166600/Seita.1G366600/Seita.1G373300/Seita.2G140600/Seita.2G145700/Seita.2G145800/Seita.2G198900/Seita.2G219700/Seita.2G404400/Seita.2G413200/Seita.3G201400/Seita.3G201500/Seita.3G247600/Seita.3G298400/Seita.3G339800/Seita.4G036200/Seita.4G145700/Seita.4G216300/Seita.4G224700/Seita.4G235500/Seita.4G235600/Seita.5G035900/Seita.5G130100/Seita.5G2…	56
blue	MF	GO:0043565	sequence-specific DNA binding	130/1579	495/8539	6.86252e-06	0.0020965	0.00200458	Seita.1G030600/Seita.1G040800/Seita.1G077900/Seita.1G081400/Seita.1G103600/Seita.1G117800/Seita.1G174100/Seita.1G190700/Seita.1G223700/Seita.1G239400/Seita.1G253100/Seita.1G257600/Seita.1G270800/Seita.1G292900/Seita.1G293000/Seita.1G294800/Seita.1G328500/Seita.1G331600/Seita.1G344700/Seita.1G370000/Seita.2G077200/Seita.2G137500/Seita.2G156100/Seita.2G177400/Seita.2G199800/Seita.2G213200/Seita.2G2…	130
blue	MF	GO:0080043	quercetin 3-O-glucosyltransferase activity	22/1579	49/8539	1.88531e-05	0.00287981	0.00275354	Seita.1G057100/Seita.1G089800/Seita.1G245200/Seita.3G194500/Seita.3G194600/Seita.4G096400/Seita.4G121900/Seita.4G127100/Seita.4G226900/Seita.4G228200/Seita.5G274700/Seita.5G283800/Seita.5G352600/Seita.6G073000/Seita.7G079000/Seita.7G318900/Seita.8G091300/Seita.8G154000/Seita.8G192500/Seita.8G192600/Seita.8G203200/Seita.9G239700	22
blue	MF	GO:0080044	quercetin 7-O-glucosyltransferase activity	22/1579	49/8539	1.88531e-05	0.00287981	0.00275354	Seita.1G057100/Seita.1G089800/Seita.1G245200/Seita.3G194500/Seita.3G194600/Seita.4G096400/Seita.4G121900/Seita.4G127100/Seita.4G226900/Seita.4G228200/Seita.5G274700/Seita.5G283800/Seita.5G352600/Seita.6G073000/Seita.7G079000/Seita.7G318900/Seita.8G091300/Seita.8G154000/Seita.8G192500/Seita.8G192600/Seita.8G203200/Seita.9G239700	22
blue	MF	GO:0016709	oxidoreductase activity, acting on paired donors, with incorporation or reduction of molecular oxygen, NAD(P)H as one donor, and incorporation of one atom of oxygen	35/1579	102/8539	9.70793e-05	0.0118631	0.0113429	Seita.2G140600/Seita.2G145700/Seita.2G145800/Seita.2G198900/Seita.2G219700/Seita.3G298400/Seita.3G339800/Seita.4G145700/Seita.4G216300/Seita.4G235500/Seita.4G235600/Seita.5G035900/Seita.5G224600/Seita.6G023100/Seita.6G100500/Seita.6G132000/Seita.7G116800/Seita.7G139200/Seita.8G068800/Seita.8G069000/Seita.8G136000/Seita.8G136400/Seita.8G166500/Seita.9G021400/Seita.9G183500/Seita.9G193900/Seita.9G2…	35
blue	MF	GO:0016682	oxidoreductase activity, acting on diphenols and related substances as donors, oxygen as acceptor	13/1579	27/8539	0.000423682	0.0391987	0.03748	Seita.1G286500/Seita.4G017200/Seita.4G054100/Seita.4G054300/Seita.4G054900/Seita.4G055000/Seita.5G444000/Seita.7G223700/Seita.7G223800/Seita.7G223900/Seita.9G352300/Seita.9G367600/Seita.9G367800	13
blue	MF	GO:0035252	UDP-xylosyltransferase activity	10/1579	18/8539	0.000466585	0.0391987	0.03748	Seita.7G139300/Seita.7G194200/Seita.7G194300/Seita.7G194800/Seita.7G194900/Seita.7G321700/Seita.8G032300/Seita.8G032400/Seita.9G430600/Seita.9G430700	10
blue	MF	GO:0035251	UDP-glucosyltransferase activity	28/1579	82/8539	0.00051324	0.0391987	0.03748	Seita.1G057100/Seita.1G089800/Seita.1G245200/Seita.3G194500/Seita.3G194600/Seita.4G096400/Seita.4G121900/Seita.4G127100/Seita.4G226900/Seita.4G228200/Seita.5G274700/Seita.5G283800/Seita.5G352600/Seita.6G073000/Seita.7G079000/Seita.7G139300/Seita.7G194200/Seita.7G194300/Seita.7G194800/Seita.7G194900/Seita.7G318900/Seita.8G091300/Seita.8G154000/Seita.8G192500/Seita.8G192600/Seita.8G203200/Seita.9G2…	28
blue	MF	GO:0015238	drug transmembrane transporter activity	33/1579	103/8539	0.000632719	0.0402114	0.0384483	Seita.1G003300/Seita.1G045300/Seita.1G131000/Seita.1G131200/Seita.1G131500/Seita.1G270500/Seita.2G001400/Seita.2G238600/Seita.2G238700/Seita.2G278500/Seita.2G324100/Seita.3G103500/Seita.3G356200/Seita.3G357100/Seita.4G006600/Seita.4G145800/Seita.4G183800/Seita.5G015100/Seita.5G274100/Seita.5G333100/Seita.7G043900/Seita.7G204900/Seita.7G308000/Seita.8G203400/Seita.8G211400/Seita.9G018900/Seita.9G2…	33
blue	MF	GO:0016679	oxidoreductase activity, acting on diphenols and related substances as donors	13/1579	28/8539	0.000658124	0.0402114	0.0384483	Seita.1G286500/Seita.4G017200/Seita.4G054100/Seita.4G054300/Seita.4G054900/Seita.4G055000/Seita.5G444000/Seita.7G223700/Seita.7G223800/Seita.7G223900/Seita.9G352300/Seita.9G367600/Seita.9G367800	13
brown	BP	GO:0071554	cell wall organization or biogenesis	122/1315	409/9983	1.36014e-19	3.21401e-16	3.05673e-16	Seita.1G079000/Seita.1G080700/Seita.1G080900/Seita.1G116500/Seita.1G165500/Seita.1G281500/Seita.1G287600/Seita.1G309600/Seita.1G310200/Seita.1G311900/Seita.1G380000/Seita.2G071400/Seita.2G081100/Seita.2G144200/Seita.2G191300/Seita.2G191400/Seita.2G200100/Seita.2G209100/Seita.2G282900/Seita.2G347700/Seita.2G356200/Seita.2G380300/Seita.2G404000/Seita.2G439200/Seita.2G443600/Seita.3G025300/Seita.3G0…	122
brown	BP	GO:0042546	cell wall biogenesis	67/1315	169/9983	3.72808e-18	4.40473e-15	4.18919e-15	Seita.1G080700/Seita.1G080900/Seita.1G116500/Seita.1G165500/Seita.1G281500/Seita.1G309600/Seita.1G311900/Seita.2G071400/Seita.2G144200/Seita.2G200100/Seita.2G209100/Seita.2G282900/Seita.2G356200/Seita.2G443600/Seita.3G025300/Seita.3G046000/Seita.3G102600/Seita.3G132100/Seita.3G136800/Seita.3G152400/Seita.3G158400/Seita.3G158500/Seita.3G217800/Seita.3G255600/Seita.3G275400/Seita.3G276800/Seita.3G2…	67
brown	BP	GO:0071669	plant-type cell wall organization or biogenesis	84/1315	257/9983	2.30273e-16	1.81378e-13	1.72502e-13	Seita.1G079000/Seita.1G080700/Seita.1G080900/Seita.1G116500/Seita.1G165500/Seita.1G281500/Seita.1G309600/Seita.1G311900/Seita.1G380000/Seita.2G071400/Seita.2G081100/Seita.2G144200/Seita.2G200100/Seita.2G209100/Seita.2G347700/Seita.2G356200/Seita.2G443600/Seita.3G025300/Seita.3G046000/Seita.3G102600/Seita.3G132100/Seita.3G136800/Seita.3G152400/Seita.3G158400/Seita.3G158500/Seita.3G217800/Seita.3G2…	84
brown	BP	GO:0009832	plant-type cell wall biogenesis	57/1315	147/9983	3.99765e-15	2.36161e-12	2.24605e-12	Seita.1G080700/Seita.1G080900/Seita.1G116500/Seita.1G165500/Seita.1G281500/Seita.1G309600/Seita.1G311900/Seita.2G071400/Seita.2G144200/Seita.2G200100/Seita.2G209100/Seita.2G356200/Seita.2G443600/Seita.3G025300/Seita.3G046000/Seita.3G102600/Seita.3G132100/Seita.3G136800/Seita.3G152400/Seita.3G158400/Seita.3G158500/Seita.3G217800/Seita.3G255600/Seita.3G275400/Seita.3G350800/Seita.3G409200/Seita.4G0…	57
brown	BP	GO:0009834	plant-type secondary cell wall biogenesis	35/1315	73/9983	5.35887e-13	2.5326e-10	2.40867e-10	Seita.1G080900/Seita.1G116500/Seita.1G281500/Seita.1G309600/Seita.2G200100/Seita.2G209100/Seita.2G356200/Seita.2G443600/Seita.3G046000/Seita.3G132100/Seita.3G136800/Seita.3G158400/Seita.3G158500/Seita.3G217800/Seita.3G275400/Seita.3G350800/Seita.4G255400/Seita.5G162900/Seita.5G236000/Seita.5G242700/Seita.5G268500/Seita.5G319100/Seita.5G363400/Seita.5G402400/Seita.5G437200/Seita.6G086100/Seita.6G2…	35
brown	BP	GO:0044038	cell wall macromolecule biosynthetic process	25/1315	49/9983	2.096e-10	6.19106e-08	5.88811e-08	Seita.1G080700/Seita.1G080900/Seita.1G165500/Seita.2G356200/Seita.2G443600/Seita.3G046000/Seita.3G132100/Seita.3G158400/Seita.3G158500/Seita.3G217800/Seita.3G255600/Seita.3G276800/Seita.4G255400/Seita.5G236000/Seita.5G268500/Seita.5G402400/Seita.5G437200/Seita.7G264400/Seita.8G060500/Seita.9G037100/Seita.9G133800/Seita.9G425900/Seita.9G440600/Seita.9G494200/Seita.9G574200	25
brown	BP	GO:0070589	cellular component macromolecule biosynthetic process	25/1315	49/9983	2.096e-10	6.19106e-08	5.88811e-08	Seita.1G080700/Seita.1G080900/Seita.1G165500/Seita.2G356200/Seita.2G443600/Seita.3G046000/Seita.3G132100/Seita.3G158400/Seita.3G158500/Seita.3G217800/Seita.3G255600/Seita.3G276800/Seita.4G255400/Seita.5G236000/Seita.5G268500/Seita.5G402400/Seita.5G437200/Seita.7G264400/Seita.8G060500/Seita.9G037100/Seita.9G133800/Seita.9G425900/Seita.9G440600/Seita.9G494200/Seita.9G574200	25
brown	BP	GO:0070592	cell wall polysaccharide biosynthetic process	25/1315	49/9983	2.096e-10	6.19106e-08	5.88811e-08	Seita.1G080700/Seita.1G080900/Seita.1G165500/Seita.2G356200/Seita.2G443600/Seita.3G046000/Seita.3G132100/Seita.3G158400/Seita.3G158500/Seita.3G217800/Seita.3G255600/Seita.3G276800/Seita.4G255400/Seita.5G236000/Seita.5G268500/Seita.5G402400/Seita.5G437200/Seita.7G264400/Seita.8G060500/Seita.9G037100/Seita.9G133800/Seita.9G425900/Seita.9G440600/Seita.9G494200/Seita.9G574200	25
brown	BP	GO:0044036	cell wall macromolecule metabolic process	44/1315	125/9983	2.37646e-10	6.23954e-08	5.93421e-08	Seita.1G080700/Seita.1G080900/Seita.1G165500/Seita.2G191300/Seita.2G191400/Seita.2G209100/Seita.2G356200/Seita.2G439200/Seita.2G443600/Seita.3G046000/Seita.3G132100/Seita.3G158400/Seita.3G158500/Seita.3G217800/Seita.3G255600/Seita.3G275400/Seita.3G276800/Seita.3G288600/Seita.4G055200/Seita.4G103800/Seita.4G255400/Seita.4G271600/Seita.5G053200/Seita.5G236000/Seita.5G260400/Seita.5G268500/Seita.5G3…	44
brown	BP	GO:0045492	xylan biosynthetic process	19/1315	31/9983	4.87153e-10	1.15114e-07	1.09481e-07	Seita.1G080900/Seita.2G356200/Seita.2G443600/Seita.3G046000/Seita.3G132100/Seita.3G158400/Seita.3G158500/Seita.3G217800/Seita.3G276800/Seita.4G255400/Seita.5G236000/Seita.5G268500/Seita.5G402400/Seita.5G437200/Seita.7G264400/Seita.9G037100/Seita.9G425900/Seita.9G440600/Seita.9G574200	19
brown	BP	GO:0097435	supramolecular fiber organization	42/1315	123/9983	1.7712e-09	3.80485e-07	3.61867e-07	Seita.1G023900/Seita.1G214200/Seita.1G220000/Seita.1G235000/Seita.1G265000/Seita.1G365900/Seita.2G157700/Seita.2G242500/Seita.2G322700/Seita.3G029800/Seita.3G044000/Seita.3G072000/Seita.3G328400/Seita.4G066100/Seita.4G072100/Seita.4G093800/Seita.4G100400/Seita.4G136600/Seita.5G162900/Seita.5G180900/Seita.5G273100/Seita.5G414700/Seita.6G029600/Seita.6G070600/Seita.7G156700/Seita.7G160500/Seita.7G1…	42
brown	BP	GO:0045491	xylan metabolic process	24/1315	51/9983	3.96452e-09	7.80679e-07	7.42477e-07	Seita.1G080900/Seita.2G356200/Seita.2G439200/Seita.2G443600/Seita.3G046000/Seita.3G132100/Seita.3G158400/Seita.3G158500/Seita.3G217800/Seita.3G275400/Seita.3G276800/Seita.4G255400/Seita.5G236000/Seita.5G268500/Seita.5G402400/Seita.5G437200/Seita.7G264400/Seita.7G310100/Seita.8G081100/Seita.8G081300/Seita.9G037100/Seita.9G425900/Seita.9G440600/Seita.9G574200	24
brown	BP	GO:0000271	polysaccharide biosynthetic process	44/1315	140/9983	1.33913e-08	2.31104e-06	2.19795e-06	Seita.1G080700/Seita.1G080900/Seita.1G165500/Seita.2G209100/Seita.2G258500/Seita.2G265800/Seita.2G356200/Seita.2G443600/Seita.3G046000/Seita.3G102600/Seita.3G132100/Seita.3G158400/Seita.3G158500/Seita.3G217800/Seita.3G255600/Seita.3G276800/Seita.4G093800/Seita.4G099300/Seita.4G099700/Seita.4G211400/Seita.4G213700/Seita.4G255400/Seita.5G236000/Seita.5G237300/Seita.5G268500/Seita.5G319100/Seita.5G4…	44
brown	BP	GO:0033692	cellular polysaccharide biosynthetic process	41/1315	126/9983	1.36921e-08	2.31104e-06	2.19795e-06	Seita.1G080700/Seita.1G080900/Seita.1G165500/Seita.2G209100/Seita.2G258500/Seita.2G265800/Seita.2G356200/Seita.2G443600/Seita.3G046000/Seita.3G102600/Seita.3G132100/Seita.3G158400/Seita.3G158500/Seita.3G217800/Seita.3G255600/Seita.3G276800/Seita.4G093800/Seita.4G099300/Seita.4G099700/Seita.4G213700/Seita.4G255400/Seita.5G236000/Seita.5G237300/Seita.5G268500/Seita.5G319100/Seita.5G402400/Seita.5G4…	41
brown	BP	GO:0010383	cell wall polysaccharide metabolic process	36/1315	104/9983	1.69872e-08	2.67605e-06	2.5451e-06	Seita.1G080700/Seita.1G080900/Seita.1G165500/Seita.2G191300/Seita.2G191400/Seita.2G356200/Seita.2G439200/Seita.2G443600/Seita.3G046000/Seita.3G132100/Seita.3G158400/Seita.3G158500/Seita.3G217800/Seita.3G255600/Seita.3G275400/Seita.3G276800/Seita.4G103800/Seita.4G255400/Seita.4G271600/Seita.5G053200/Seita.5G236000/Seita.5G268500/Seita.5G402400/Seita.5G437200/Seita.7G264400/Seita.7G310100/Seita.8G0…	36
brown	BP	GO:0007010	cytoskeleton organization	63/1315	237/9983	1.83837e-08	2.71505e-06	2.58219e-06	Seita.1G023900/Seita.1G096400/Seita.1G214200/Seita.1G220000/Seita.1G235000/Seita.1G265000/Seita.1G311900/Seita.1G365900/Seita.2G031200/Seita.2G144200/Seita.2G157700/Seita.2G207800/Seita.2G242500/Seita.2G269500/Seita.2G322700/Seita.2G400100/Seita.3G029800/Seita.3G044000/Seita.3G072000/Seita.3G211800/Seita.3G273200/Seita.3G312900/Seita.3G328400/Seita.3G409200/Seita.4G046200/Seita.4G066100/Seita.4G0…	63
brown	BP	GO:0007017	microtubule-based process	49/1315	169/9983	3.79279e-08	5.27197e-06	5.01399e-06	Seita.1G005900/Seita.1G027900/Seita.1G096400/Seita.1G214200/Seita.1G235000/Seita.1G252700/Seita.1G265000/Seita.1G291400/Seita.1G310000/Seita.1G337400/Seita.2G031200/Seita.2G144200/Seita.2G207800/Seita.2G242500/Seita.2G400100/Seita.3G029800/Seita.3G044000/Seita.3G273200/Seita.3G328400/Seita.3G340900/Seita.4G026500/Seita.4G046200/Seita.4G093800/Seita.4G136600/Seita.4G163700/Seita.5G055100/Seita.5G1…	49
brown	BP	GO:0007018	microtubule-based movement	28/1315	77/9983	2.01904e-07	2.51105e-05	2.38818e-05	Seita.1G005900/Seita.1G027900/Seita.1G252700/Seita.1G291400/Seita.1G310000/Seita.1G337400/Seita.2G144200/Seita.2G207800/Seita.3G029800/Seita.3G044000/Seita.3G328400/Seita.3G340900/Seita.4G026500/Seita.4G163700/Seita.5G055100/Seita.5G162900/Seita.5G233200/Seita.5G314600/Seita.6G237500/Seita.7G102100/Seita.7G183000/Seita.7G248700/Seita.7G267000/Seita.8G129000/Seita.8G215500/Seita.9G073300/Seita.9G5…	28
brown	BP	GO:0010410	hemicellulose metabolic process	28/1315	77/9983	2.01904e-07	2.51105e-05	2.38818e-05	Seita.1G080900/Seita.2G191300/Seita.2G191400/Seita.2G356200/Seita.2G439200/Seita.2G443600/Seita.3G046000/Seita.3G132100/Seita.3G158400/Seita.3G158500/Seita.3G217800/Seita.3G275400/Seita.3G276800/Seita.4G103800/Seita.4G255400/Seita.5G236000/Seita.5G268500/Seita.5G402400/Seita.5G437200/Seita.7G264400/Seita.7G310100/Seita.8G081100/Seita.8G081300/Seita.9G037100/Seita.9G260200/Seita.9G425900/Seita.9G4…	28
brown	BP	GO:0034637	cellular carbohydrate biosynthetic process	44/1315	156/9983	4.40916e-07	5.20942e-05	4.9545e-05	Seita.1G080700/Seita.1G080900/Seita.1G165500/Seita.1G323700/Seita.2G197800/Seita.2G209100/Seita.2G258500/Seita.2G265800/Seita.2G356200/Seita.2G443600/Seita.3G046000/Seita.3G102600/Seita.3G132100/Seita.3G158400/Seita.3G158500/Seita.3G217800/Seita.3G255600/Seita.3G276800/Seita.4G093800/Seita.4G099300/Seita.4G099700/Seita.4G213700/Seita.4G255400/Seita.5G236000/Seita.5G237300/Seita.5G268500/Seita.5G3…	44
brown	BP	GO:0005976	polysaccharide metabolic process	63/1315	260/9983	7.0015e-07	7.87835e-05	7.49283e-05	Seita.1G080700/Seita.1G080900/Seita.1G165500/Seita.1G362300/Seita.2G191300/Seita.2G191400/Seita.2G209100/Seita.2G235900/Seita.2G258500/Seita.2G265800/Seita.2G356200/Seita.2G439200/Seita.2G443600/Seita.3G046000/Seita.3G102600/Seita.3G132100/Seita.3G158400/Seita.3G158500/Seita.3G217800/Seita.3G255600/Seita.3G275400/Seita.3G276800/Seita.3G288600/Seita.4G093800/Seita.4G099300/Seita.4G099700/Seita.4G1…	63
brown	BP	GO:0051258	protein polymerization	24/1315	64/9983	7.77454e-07	8.35056e-05	7.94194e-05	Seita.1G023900/Seita.1G235000/Seita.1G365900/Seita.2G157700/Seita.2G322700/Seita.3G072000/Seita.4G066100/Seita.4G072100/Seita.5G414700/Seita.6G029600/Seita.6G070600/Seita.7G137000/Seita.7G156700/Seita.7G160500/Seita.7G163400/Seita.7G227100/Seita.7G265800/Seita.9G012600/Seita.9G282300/Seita.9G383900/Seita.9G398900/Seita.9G470300/Seita.9G472600/Seita.9G543000	24
brown	BP	GO:0032535	regulation of cellular component size	29/1315	90/9983	2.23668e-06	0.000229794	0.000218549	Seita.1G023900/Seita.1G214500/Seita.1G214600/Seita.1G365900/Seita.2G157700/Seita.2G302600/Seita.3G072000/Seita.3G154500/Seita.3G196800/Seita.3G211800/Seita.4G066100/Seita.4G072100/Seita.4G093300/Seita.5G331200/Seita.5G414700/Seita.6G070600/Seita.6G205500/Seita.6G253500/Seita.7G123300/Seita.7G163400/Seita.7G227100/Seita.7G265800/Seita.7G309900/Seita.8G016500/Seita.9G012600/Seita.9G383900/Seita.9G3…	29
brown	BP	GO:0044264	cellular polysaccharide metabolic process	50/1315	197/9983	2.38451e-06	0.000234775	0.000223287	Seita.1G080700/Seita.1G080900/Seita.1G165500/Seita.2G191300/Seita.2G191400/Seita.2G209100/Seita.2G235900/Seita.2G258500/Seita.2G265800/Seita.2G356200/Seita.2G443600/Seita.3G046000/Seita.3G102600/Seita.3G132100/Seita.3G158400/Seita.3G158500/Seita.3G217800/Seita.3G255600/Seita.3G276800/Seita.3G288600/Seita.4G093800/Seita.4G099300/Seita.4G099700/Seita.4G103800/Seita.4G213700/Seita.4G255400/Seita.4G2…	50
brown	BP	GO:0010413	glucuronoxylan metabolic process	11/1315	18/9983	2.60726e-06	0.000236959	0.000225364	Seita.2G356200/Seita.2G443600/Seita.3G046000/Seita.3G158400/Seita.3G158500/Seita.3G217800/Seita.5G268500/Seita.5G402400/Seita.5G437200/Seita.7G264400/Seita.9G574200	11
brown	BP	GO:0010417	glucuronoxylan biosynthetic process	11/1315	18/9983	2.60726e-06	0.000236959	0.000225364	Seita.2G356200/Seita.2G443600/Seita.3G046000/Seita.3G158400/Seita.3G158500/Seita.3G217800/Seita.5G268500/Seita.5G402400/Seita.5G437200/Seita.7G264400/Seita.9G574200	11
brown	BP	GO:0044262	cellular carbohydrate metabolic process	68/1315	299/9983	2.92669e-06	0.000256139	0.000243605	Seita.1G015500/Seita.1G080700/Seita.1G080900/Seita.1G165500/Seita.1G314300/Seita.1G323700/Seita.2G143400/Seita.2G191300/Seita.2G191400/Seita.2G197800/Seita.2G209100/Seita.2G235900/Seita.2G258500/Seita.2G262300/Seita.2G265800/Seita.2G337700/Seita.2G356200/Seita.2G443600/Seita.3G046000/Seita.3G102600/Seita.3G132100/Seita.3G158400/Seita.3G158500/Seita.3G173900/Seita.3G217800/Seita.3G255600/Seita.3G2…	68
brown	BP	GO:0009825	multidimensional cell growth	17/1315	40/9983	4.34552e-06	0.000366731	0.000348785	Seita.1G214500/Seita.1G214600/Seita.1G220000/Seita.1G310200/Seita.2G258500/Seita.3G217100/Seita.4G100400/Seita.5G273100/Seita.5G376800/Seita.5G438400/Seita.6G070600/Seita.6G209900/Seita.8G008100/Seita.9G053400/Seita.9G088500/Seita.9G233400/Seita.9G278400	17
brown	BP	GO:0016049	cell growth	85/1315	404/9983	5.0719e-06	0.000413272	0.000393049	Seita.1G078600/Seita.1G116500/Seita.1G175900/Seita.1G214500/Seita.1G214600/Seita.1G220000/Seita.1G235000/Seita.1G238600/Seita.1G282900/Seita.1G310200/Seita.1G349700/Seita.1G362300/Seita.1G378800/Seita.2G005900/Seita.2G081100/Seita.2G112700/Seita.2G216300/Seita.2G258500/Seita.2G302600/Seita.2G334200/Seita.2G353200/Seita.2G397800/Seita.2G410400/Seita.3G012800/Seita.3G044000/Seita.3G136000/Seita.3G1…	85
brown	BP	GO:0071555	cell wall organization	45/1315	177/9983	7.18904e-06	0.000566257	0.000538547	Seita.1G079000/Seita.1G080700/Seita.1G165500/Seita.1G287600/Seita.1G310200/Seita.1G380000/Seita.2G081100/Seita.2G144200/Seita.2G209100/Seita.2G380300/Seita.2G404000/Seita.3G233200/Seita.3G233300/Seita.3G255600/Seita.3G347500/Seita.4G086700/Seita.4G093800/Seita.4G131900/Seita.4G271600/Seita.5G146100/Seita.5G260400/Seita.5G469600/Seita.7G196300/Seita.7G203800/Seita.7G225900/Seita.7G239900/Seita.8G0…	45
brown	BP	GO:0090066	regulation of anatomical structure size	29/1315	95/9983	7.48305e-06	0.000570402	0.00054249	Seita.1G023900/Seita.1G214500/Seita.1G214600/Seita.1G365900/Seita.2G157700/Seita.2G302600/Seita.3G072000/Seita.3G154500/Seita.3G196800/Seita.3G211800/Seita.4G066100/Seita.4G072100/Seita.4G093300/Seita.5G331200/Seita.5G414700/Seita.6G070600/Seita.6G205500/Seita.6G253500/Seita.7G123300/Seita.7G163400/Seita.7G227100/Seita.7G265800/Seita.7G309900/Seita.8G016500/Seita.9G012600/Seita.9G383900/Seita.9G3…	29
brown	BP	GO:0000226	microtubule cytoskeleton organization	33/1315	116/9983	9.757e-06	0.000720494	0.000685237	Seita.1G096400/Seita.1G214200/Seita.1G235000/Seita.1G265000/Seita.2G031200/Seita.2G144200/Seita.2G207800/Seita.2G242500/Seita.2G400100/Seita.3G029800/Seita.3G044000/Seita.3G273200/Seita.3G328400/Seita.4G046200/Seita.4G093800/Seita.4G136600/Seita.4G163700/Seita.5G162900/Seita.5G233200/Seita.5G273100/Seita.5G399400/Seita.6G029600/Seita.7G156700/Seita.7G160500/Seita.7G248700/Seita.7G267000/Seita.7G3…	33
brown	BP	GO:0051261	protein depolymerization	12/1315	24/9983	1.52103e-05	0.00108915	0.00103585	Seita.1G235000/Seita.3G072000/Seita.4G066100/Seita.5G162900/Seita.5G414700/Seita.7G160500/Seita.7G227100/Seita.7G265800/Seita.7G267000/Seita.9G073300/Seita.9G383900/Seita.9G398900	12
brown	BP	GO:0007015	actin filament organization	23/1315	71/9983	2.23448e-05	0.00155296	0.00147697	Seita.1G023900/Seita.1G220000/Seita.1G365900/Seita.2G157700/Seita.2G322700/Seita.3G072000/Seita.4G066100/Seita.4G072100/Seita.4G100400/Seita.5G180900/Seita.5G414700/Seita.6G070600/Seita.7G163400/Seita.7G179500/Seita.7G227100/Seita.7G265800/Seita.9G012600/Seita.9G383900/Seita.9G398900/Seita.9G417500/Seita.9G464500/Seita.9G472600/Seita.9G543000	23
brown	BP	GO:1901880	negative regulation of protein depolymerization	9/1315	15/9983	2.75696e-05	0.0018246	0.00173532	Seita.1G235000/Seita.3G072000/Seita.4G066100/Seita.5G414700/Seita.7G160500/Seita.7G227100/Seita.7G265800/Seita.9G383900/Seita.9G398900	9
brown	BP	GO:0000902	cell morphogenesis	80/1315	391/9983	2.77976e-05	0.0018246	0.00173532	Seita.1G078600/Seita.1G116500/Seita.1G175900/Seita.1G214500/Seita.1G214600/Seita.1G220000/Seita.1G235000/Seita.1G238600/Seita.1G282900/Seita.1G314200/Seita.1G349700/Seita.1G362300/Seita.1G378800/Seita.2G005900/Seita.2G081100/Seita.2G112700/Seita.2G151300/Seita.2G322700/Seita.2G334200/Seita.2G397800/Seita.2G410400/Seita.3G012800/Seita.3G029800/Seita.3G044000/Seita.3G097700/Seita.3G136000/Seita.3G1…	80
brown	BP	GO:0003002	regionalization	43/1315	176/9983	3.25405e-05	0.00206214	0.00196123	Seita.1G052100/Seita.1G075600/Seita.1G311900/Seita.1G362300/Seita.1G366100/Seita.2G025300/Seita.2G242500/Seita.2G269500/Seita.2G278300/Seita.2G357900/Seita.3G012800/Seita.3G029800/Seita.3G126100/Seita.3G152400/Seita.3G220700/Seita.3G228400/Seita.3G312900/Seita.3G398000/Seita.3G409200/Seita.4G086700/Seita.4G101300/Seita.5G068100/Seita.5G152100/Seita.5G164900/Seita.5G226700/Seita.5G394200/Seita.5G4…	43
brown	BP	GO:0007389	pattern specification process	48/1315	204/9983	3.31618e-05	0.00206214	0.00196123	Seita.1G005900/Seita.1G052100/Seita.1G075600/Seita.1G291400/Seita.1G311900/Seita.1G352800/Seita.1G362300/Seita.1G366100/Seita.2G025300/Seita.2G242500/Seita.2G269500/Seita.2G278300/Seita.2G357900/Seita.3G012800/Seita.3G029800/Seita.3G101400/Seita.3G126100/Seita.3G136000/Seita.3G152400/Seita.3G220700/Seita.3G228400/Seita.3G312900/Seita.3G398000/Seita.3G409200/Seita.4G086700/Seita.4G101300/Seita.5G0…	48
brown	BP	GO:0008154	actin polymerization or depolymerization	18/1315	50/9983	3.53433e-05	0.00214144	0.00203665	Seita.1G023900/Seita.1G365900/Seita.2G157700/Seita.2G322700/Seita.3G072000/Seita.4G066100/Seita.4G072100/Seita.5G414700/Seita.6G070600/Seita.7G163400/Seita.7G227100/Seita.7G265800/Seita.9G012600/Seita.9G383900/Seita.9G398900/Seita.9G417500/Seita.9G472600/Seita.9G543000	18
brown	BP	GO:0030041	actin filament polymerization	17/1315	46/9983	3.93413e-05	0.00232409	0.00221036	Seita.1G023900/Seita.1G365900/Seita.2G157700/Seita.2G322700/Seita.3G072000/Seita.4G066100/Seita.4G072100/Seita.5G414700/Seita.6G070600/Seita.7G163400/Seita.7G227100/Seita.7G265800/Seita.9G012600/Seita.9G383900/Seita.9G398900/Seita.9G472600/Seita.9G543000	17
brown	BP	GO:0009664	plant-type cell wall organization	33/1315	125/9983	5.2119e-05	0.00300383	0.00285684	Seita.1G079000/Seita.1G080700/Seita.1G165500/Seita.1G380000/Seita.2G081100/Seita.2G144200/Seita.2G209100/Seita.3G233200/Seita.3G233300/Seita.3G255600/Seita.3G347500/Seita.4G086700/Seita.4G093800/Seita.4G131900/Seita.4G271600/Seita.5G260400/Seita.7G196300/Seita.7G203800/Seita.8G060500/Seita.8G100100/Seita.9G012600/Seita.9G088500/Seita.9G133800/Seita.9G287300/Seita.9G287400/Seita.9G287600/Seita.9G3…	33
brown	BP	GO:0043242	negative regulation of protein complex disassembly	9/1315	16/9983	5.56492e-05	0.00313093	0.00297772	Seita.1G235000/Seita.3G072000/Seita.4G066100/Seita.5G414700/Seita.7G160500/Seita.7G227100/Seita.7G265800/Seita.9G383900/Seita.9G398900	9
brown	BP	GO:0051493	regulation of cytoskeleton organization	23/1315	75/9983	5.9381e-05	0.00326319	0.00310351	Seita.1G023900/Seita.1G235000/Seita.1G365900/Seita.2G157700/Seita.2G242500/Seita.3G072000/Seita.3G211800/Seita.3G312900/Seita.4G066100/Seita.4G072100/Seita.4G093800/Seita.5G414700/Seita.6G070600/Seita.7G156700/Seita.7G160500/Seita.7G163400/Seita.7G227100/Seita.7G265800/Seita.9G012600/Seita.9G383900/Seita.9G398900/Seita.9G417500/Seita.9G543000	23
brown	BP	GO:0045229	external encapsulating structure organization	48/1315	209/9983	6.37021e-05	0.00342109	0.00325368	Seita.1G079000/Seita.1G080700/Seita.1G165500/Seita.1G262100/Seita.1G287600/Seita.1G310200/Seita.1G380000/Seita.2G081100/Seita.2G144200/Seita.2G209100/Seita.2G224700/Seita.2G380300/Seita.2G404000/Seita.3G233200/Seita.3G233300/Seita.3G255600/Seita.3G347500/Seita.4G086700/Seita.4G093800/Seita.4G131900/Seita.4G271600/Seita.5G146100/Seita.5G260400/Seita.5G469600/Seita.7G196300/Seita.7G203800/Seita.7G2…	48
brown	BP	GO:0010051	xylem and phloem pattern formation	22/1315	71/9983	7.18065e-05	0.00376974	0.00358527	Seita.1G311900/Seita.1G366100/Seita.2G025300/Seita.2G269500/Seita.3G012800/Seita.3G126100/Seita.3G152400/Seita.3G220700/Seita.3G228400/Seita.3G409200/Seita.4G101300/Seita.5G152100/Seita.5G226700/Seita.5G394200/Seita.6G001600/Seita.7G264400/Seita.9G061800/Seita.9G074700/Seita.9G100300/Seita.9G207500/Seita.9G265800/Seita.9G490100	22
brown	BP	GO:1902903	regulation of supramolecular fiber organization	19/1315	57/9983	7.33846e-05	0.00376974	0.00358527	Seita.1G023900/Seita.1G235000/Seita.1G365900/Seita.2G157700/Seita.3G072000/Seita.4G066100/Seita.4G072100/Seita.5G414700/Seita.6G070600/Seita.7G156700/Seita.7G160500/Seita.7G163400/Seita.7G227100/Seita.7G265800/Seita.9G012600/Seita.9G383900/Seita.9G398900/Seita.9G417500/Seita.9G543000	19
brown	BP	GO:0016051	carbohydrate biosynthetic process	50/1315	223/9983	8.67629e-05	0.00436214	0.00414869	Seita.1G080700/Seita.1G080900/Seita.1G165500/Seita.1G323700/Seita.2G197800/Seita.2G209100/Seita.2G258500/Seita.2G265800/Seita.2G356200/Seita.2G443600/Seita.3G046000/Seita.3G102600/Seita.3G132100/Seita.3G158400/Seita.3G158500/Seita.3G217800/Seita.3G255600/Seita.3G276800/Seita.4G093800/Seita.4G099300/Seita.4G099700/Seita.4G211400/Seita.4G213700/Seita.4G255400/Seita.5G236000/Seita.5G237300/Seita.5G2…	50
brown	BP	GO:0006928	movement of cell or subcellular component	35/1315	139/9983	8.98182e-05	0.00442168	0.00420531	Seita.1G005900/Seita.1G027900/Seita.1G252700/Seita.1G291400/Seita.1G310000/Seita.1G337400/Seita.2G144200/Seita.2G157700/Seita.2G207800/Seita.2G282000/Seita.2G302100/Seita.2G322700/Seita.2G353200/Seita.3G029800/Seita.3G044000/Seita.3G328400/Seita.3G340900/Seita.4G026500/Seita.4G163700/Seita.5G055100/Seita.5G123600/Seita.5G162900/Seita.5G233200/Seita.5G314600/Seita.6G235900/Seita.6G237500/Seita.7G1…	35
brown	BP	GO:0032989	cellular component morphogenesis	85/1315	440/9983	0.000134278	0.00637003	0.00605831	Seita.1G078600/Seita.1G096400/Seita.1G116500/Seita.1G175900/Seita.1G214500/Seita.1G214600/Seita.1G220000/Seita.1G235000/Seita.1G238600/Seita.1G262100/Seita.1G282900/Seita.1G314200/Seita.1G349700/Seita.1G362300/Seita.1G378800/Seita.2G005900/Seita.2G081100/Seita.2G112700/Seita.2G151300/Seita.2G224700/Seita.2G322700/Seita.2G334200/Seita.2G397800/Seita.2G410400/Seita.3G012800/Seita.3G029800/Seita.3G0…	85
brown	BP	GO:0043244	regulation of protein complex disassembly	10/1315	21/9983	0.000134787	0.00637003	0.00605831	Seita.1G052100/Seita.1G235000/Seita.3G072000/Seita.4G066100/Seita.5G414700/Seita.7G160500/Seita.7G227100/Seita.7G265800/Seita.9G383900/Seita.9G398900	10
brown	BP	GO:0034629	cellular protein-containing complex localization	7/1315	11/9983	0.000137759	0.00638285	0.00607051	Seita.2G075800/Seita.2G325500/Seita.2G357000/Seita.2G367900/Seita.7G156700/Seita.7G286200/Seita.8G049400	7
brown	BP	GO:0008064	regulation of actin polymerization or depolymerization	16/1315	46/9983	0.00015262	0.00680453	0.00647156	Seita.1G023900/Seita.1G365900/Seita.2G157700/Seita.3G072000/Seita.4G066100/Seita.4G072100/Seita.5G414700/Seita.6G070600/Seita.7G163400/Seita.7G227100/Seita.7G265800/Seita.9G012600/Seita.9G383900/Seita.9G398900/Seita.9G417500/Seita.9G543000	16
brown	BP	GO:0030832	regulation of actin filament length	16/1315	46/9983	0.00015262	0.00680453	0.00647156	Seita.1G023900/Seita.1G365900/Seita.2G157700/Seita.3G072000/Seita.4G066100/Seita.4G072100/Seita.5G414700/Seita.6G070600/Seita.7G163400/Seita.7G227100/Seita.7G265800/Seita.9G012600/Seita.9G383900/Seita.9G398900/Seita.9G417500/Seita.9G543000	16
brown	BP	GO:0016482	cytosolic transport	14/1315	38/9983	0.000195321	0.00839169	0.00798105	Seita.2G113600/Seita.2G138800/Seita.2G322100/Seita.2G406100/Seita.3G105200/Seita.3G312900/Seita.3G358300/Seita.4G066100/Seita.4G115600/Seita.7G020200/Seita.7G227100/Seita.9G100300/Seita.9G213400/Seita.9G240200	14
brown	BP	GO:0051274	beta-glucan biosynthetic process	14/1315	38/9983	0.000195321	0.00839169	0.00798105	Seita.2G209100/Seita.2G258500/Seita.2G265800/Seita.3G102600/Seita.3G255600/Seita.4G093800/Seita.4G213700/Seita.5G319100/Seita.6G209900/Seita.7G328700/Seita.8G060500/Seita.9G020600/Seita.9G227400/Seita.9G518900	14
brown	BP	GO:0032271	regulation of protein polymerization	16/1315	47/9983	0.000203443	0.00858456	0.00816449	Seita.1G023900/Seita.1G365900/Seita.2G157700/Seita.3G072000/Seita.4G066100/Seita.4G072100/Seita.5G414700/Seita.6G070600/Seita.7G156700/Seita.7G163400/Seita.7G227100/Seita.7G265800/Seita.9G012600/Seita.9G383900/Seita.9G398900/Seita.9G543000	16
brown	BP	GO:0030244	cellulose biosynthetic process	13/1315	34/9983	0.000214045	0.00887346	0.00843925	Seita.2G209100/Seita.2G258500/Seita.2G265800/Seita.3G102600/Seita.3G255600/Seita.4G093800/Seita.4G213700/Seita.5G319100/Seita.6G209900/Seita.7G328700/Seita.8G060500/Seita.9G020600/Seita.9G227400	13
brown	BP	GO:0030833	regulation of actin filament polymerization	15/1315	43/9983	0.000235266	0.00958504	0.00911601	Seita.1G023900/Seita.1G365900/Seita.2G157700/Seita.3G072000/Seita.4G066100/Seita.4G072100/Seita.5G414700/Seita.6G070600/Seita.7G163400/Seita.7G227100/Seita.7G265800/Seita.9G012600/Seita.9G383900/Seita.9G398900/Seita.9G543000	15
brown	BP	GO:0005975	carbohydrate metabolic process	89/1315	474/9983	0.000261503	0.0104734	0.0099609	Seita.1G015500/Seita.1G080700/Seita.1G080900/Seita.1G165500/Seita.1G206800/Seita.1G314300/Seita.1G323700/Seita.1G362300/Seita.2G003400/Seita.2G143400/Seita.2G191300/Seita.2G191400/Seita.2G197800/Seita.2G209100/Seita.2G235900/Seita.2G258500/Seita.2G262300/Seita.2G265800/Seita.2G337700/Seita.2G356200/Seita.2G439200/Seita.2G443600/Seita.3G046000/Seita.3G102600/Seita.3G132100/Seita.3G158400/Seita.3G1…	89
brown	BP	GO:0110053	regulation of actin filament organization	16/1315	48/9983	0.000268331	0.0105678	0.0100506	Seita.1G023900/Seita.1G365900/Seita.2G157700/Seita.3G072000/Seita.4G066100/Seita.4G072100/Seita.5G414700/Seita.6G070600/Seita.7G163400/Seita.7G227100/Seita.7G265800/Seita.9G012600/Seita.9G383900/Seita.9G398900/Seita.9G417500/Seita.9G543000	16
brown	BP	GO:0016192	vesicle-mediated transport	70/1315	355/9983	0.00027934	0.010821	0.0102915	Seita.1G088800/Seita.1G096400/Seita.1G215100/Seita.1G238600/Seita.1G314200/Seita.1G319900/Seita.1G355400/Seita.2G071400/Seita.2G075800/Seita.2G097000/Seita.2G113600/Seita.2G127000/Seita.2G138800/Seita.2G144200/Seita.2G157700/Seita.2G205500/Seita.2G207800/Seita.2G269500/Seita.2G283200/Seita.2G313000/Seita.2G322100/Seita.2G357000/Seita.2G400000/Seita.2G406100/Seita.2G414700/Seita.3G012800/Seita.3G1…	70
brown	BP	GO:0030835	negative regulation of actin filament depolymerization	7/1315	12/9983	0.000293001	0.0109899	0.0104521	Seita.3G072000/Seita.4G066100/Seita.5G414700/Seita.7G227100/Seita.7G265800/Seita.9G383900/Seita.9G398900	7
brown	BP	GO:0051693	actin filament capping	7/1315	12/9983	0.000293001	0.0109899	0.0104521	Seita.3G072000/Seita.4G066100/Seita.5G414700/Seita.7G227100/Seita.7G265800/Seita.9G383900/Seita.9G398900	7
brown	BP	GO:1901879	regulation of protein depolymerization	9/1315	19/9983	0.000309832	0.0114396	0.0108798	Seita.1G235000/Seita.3G072000/Seita.4G066100/Seita.5G414700/Seita.7G160500/Seita.7G227100/Seita.7G265800/Seita.9G383900/Seita.9G398900	9
brown	BP	GO:0009741	response to brassinosteroid	25/1315	94/9983	0.000360203	0.0130017	0.0123655	Seita.1G064600/Seita.1G238600/Seita.1G282900/Seita.2G204400/Seita.2G224700/Seita.3G126100/Seita.3G255700/Seita.3G289000/Seita.3G382500/Seita.4G177000/Seita.4G286300/Seita.5G044400/Seita.5G050500/Seita.5G123900/Seita.5G145300/Seita.5G152100/Seita.5G226700/Seita.6G098100/Seita.6G188100/Seita.7G240600/Seita.9G029000/Seita.9G408500/Seita.9G447800/Seita.9G480100/Seita.J001400	25
brown	BP	GO:0031122	cytoplasmic microtubule organization	14/1315	40/9983	0.000363146	0.0130017	0.0123655	Seita.1G214200/Seita.1G235000/Seita.1G265000/Seita.2G242500/Seita.3G029800/Seita.3G044000/Seita.3G328400/Seita.4G093800/Seita.4G136600/Seita.5G273100/Seita.7G156700/Seita.7G160500/Seita.9G053400/Seita.9G073300	14
brown	BP	GO:0032956	regulation of actin cytoskeleton organization	18/1315	59/9983	0.000395073	0.0137288	0.013057	Seita.1G023900/Seita.1G365900/Seita.2G157700/Seita.3G072000/Seita.3G211800/Seita.3G312900/Seita.4G066100/Seita.4G072100/Seita.5G414700/Seita.6G070600/Seita.7G163400/Seita.7G227100/Seita.7G265800/Seita.9G012600/Seita.9G383900/Seita.9G398900/Seita.9G417500/Seita.9G543000	18
brown	BP	GO:0032970	regulation of actin filament-based process	18/1315	59/9983	0.000395073	0.0137288	0.013057	Seita.1G023900/Seita.1G365900/Seita.2G157700/Seita.3G072000/Seita.3G211800/Seita.3G312900/Seita.4G066100/Seita.4G072100/Seita.5G414700/Seita.6G070600/Seita.7G163400/Seita.7G227100/Seita.7G265800/Seita.9G012600/Seita.9G383900/Seita.9G398900/Seita.9G417500/Seita.9G543000	18
brown	BP	GO:0030036	actin cytoskeleton organization	25/1315	95/9983	0.000428873	0.0146873	0.0139686	Seita.1G023900/Seita.1G220000/Seita.1G365900/Seita.2G157700/Seita.2G322700/Seita.3G072000/Seita.3G211800/Seita.3G312900/Seita.4G066100/Seita.4G072100/Seita.4G100400/Seita.5G180900/Seita.5G414700/Seita.6G070600/Seita.7G163400/Seita.7G179500/Seita.7G227100/Seita.7G265800/Seita.9G012600/Seita.9G383900/Seita.9G398900/Seita.9G417500/Seita.9G464500/Seita.9G472600/Seita.9G543000	25
brown	BP	GO:0009826	unidimensional cell growth	53/1315	257/9983	0.000501152	0.0169175	0.0160896	Seita.1G078600/Seita.1G116500/Seita.1G175900/Seita.1G235000/Seita.1G238600/Seita.1G282900/Seita.1G349700/Seita.1G362300/Seita.1G378800/Seita.2G005900/Seita.2G081100/Seita.2G112700/Seita.2G334200/Seita.2G397800/Seita.2G410400/Seita.3G012800/Seita.3G044000/Seita.3G136800/Seita.3G211800/Seita.3G237000/Seita.3G280300/Seita.3G388100/Seita.3G397200/Seita.4G072100/Seita.4G260000/Seita.5G157500/Seita.5G2…	53
brown	BP	GO:0030243	cellulose metabolic process	14/1315	42/9983	0.000641082	0.02104	0.0200104	Seita.2G209100/Seita.2G258500/Seita.2G265800/Seita.3G102600/Seita.3G255600/Seita.4G093800/Seita.4G213700/Seita.4G271600/Seita.5G319100/Seita.6G209900/Seita.7G328700/Seita.8G060500/Seita.9G020600/Seita.9G227400	14
brown	BP	GO:0043624	cellular protein complex disassembly	14/1315	42/9983	0.000641082	0.02104	0.0200104	Seita.1G151400/Seita.1G235000/Seita.3G072000/Seita.4G066100/Seita.5G162900/Seita.5G414700/Seita.6G107400/Seita.7G160500/Seita.7G227100/Seita.7G265800/Seita.7G267000/Seita.9G073300/Seita.9G383900/Seita.9G398900	14
brown	BP	GO:0051273	beta-glucan metabolic process	15/1315	47/9983	0.000699384	0.022639	0.0215312	Seita.2G209100/Seita.2G258500/Seita.2G265800/Seita.3G102600/Seita.3G255600/Seita.4G093800/Seita.4G213700/Seita.4G271600/Seita.5G319100/Seita.6G209900/Seita.7G328700/Seita.8G060500/Seita.9G020600/Seita.9G227400/Seita.9G518900	15
brown	BP	GO:0010582	floral meristem determinacy	9/1315	21/9983	0.000770174	0.0242656	0.0230782	Seita.2G002300/Seita.2G204400/Seita.3G073000/Seita.3G147000/Seita.5G265200/Seita.5G451100/Seita.7G222300/Seita.8G026700/Seita.9G088700	9
brown	BP	GO:0031109	microtubule polymerization or depolymerization	9/1315	21/9983	0.000770174	0.0242656	0.0230782	Seita.1G235000/Seita.5G162900/Seita.6G029600/Seita.7G156700/Seita.7G160500/Seita.7G267000/Seita.9G073300/Seita.9G282300/Seita.9G470300	9
brown	BP	GO:1903338	regulation of cell wall organization or biogenesis	12/1315	34/9983	0.000869432	0.0270325	0.0257096	Seita.1G281500/Seita.1G309600/Seita.2G200100/Seita.3G136800/Seita.3G222200/Seita.3G255600/Seita.3G350800/Seita.5G162900/Seita.5G242700/Seita.5G363400/Seita.7G267000/Seita.9G113200	12
brown	BP	GO:0030042	actin filament depolymerization	7/1315	14/9983	0.000998002	0.0302343	0.0287549	Seita.3G072000/Seita.4G066100/Seita.5G414700/Seita.7G227100/Seita.7G265800/Seita.9G383900/Seita.9G398900	7
brown	BP	GO:0030834	regulation of actin filament depolymerization	7/1315	14/9983	0.000998002	0.0302343	0.0287549	Seita.3G072000/Seita.4G066100/Seita.5G414700/Seita.7G227100/Seita.7G265800/Seita.9G383900/Seita.9G398900	7
brown	BP	GO:0030029	actin filament-based process	26/1315	106/9983	0.00105432	0.0315362	0.029993	Seita.1G023900/Seita.1G220000/Seita.1G365900/Seita.2G157700/Seita.2G302100/Seita.2G322700/Seita.3G072000/Seita.3G211800/Seita.3G312900/Seita.4G066100/Seita.4G072100/Seita.4G100400/Seita.5G180900/Seita.5G414700/Seita.6G070600/Seita.7G163400/Seita.7G179500/Seita.7G227100/Seita.7G265800/Seita.9G012600/Seita.9G383900/Seita.9G398900/Seita.9G417500/Seita.9G464500/Seita.9G472600/Seita.9G543000	26
brown	BP	GO:0060918	auxin transport	25/1315	101/9983	0.0011349	0.0335031	0.0318637	Seita.1G075600/Seita.1G116500/Seita.2G151300/Seita.2G207600/Seita.3G012800/Seita.3G136000/Seita.3G180200/Seita.3G223500/Seita.3G398000/Seita.4G101300/Seita.5G295300/Seita.5G315600/Seita.5G323800/Seita.5G387200/Seita.5G424300/Seita.6G001600/Seita.6G251100/Seita.6G253500/Seita.7G123300/Seita.8G020600/Seita.8G122900/Seita.9G127500/Seita.9G142900/Seita.9G398900/Seita.9G520700	25
brown	BP	GO:0010022	meristem determinacy	9/1315	22/9983	0.00115239	0.0335031	0.0318637	Seita.2G002300/Seita.2G204400/Seita.3G073000/Seita.3G147000/Seita.5G265200/Seita.5G451100/Seita.7G222300/Seita.8G026700/Seita.9G088700	9
brown	BP	GO:0071367	cellular response to brassinosteroid stimulus	16/1315	54/9983	0.00116261	0.0335031	0.0318637	Seita.1G064600/Seita.2G224700/Seita.3G126100/Seita.3G382500/Seita.4G177000/Seita.4G286300/Seita.5G044400/Seita.5G050500/Seita.5G145300/Seita.5G152100/Seita.5G226700/Seita.6G098100/Seita.6G188100/Seita.9G029000/Seita.9G408500/Seita.J001400	16
brown	BP	GO:0060560	developmental growth involved in morphogenesis	60/1315	310/9983	0.00119946	0.0341484	0.0324774	Seita.1G078600/Seita.1G116500/Seita.1G175900/Seita.1G235000/Seita.1G238600/Seita.1G282900/Seita.1G349700/Seita.1G362300/Seita.1G378800/Seita.2G005900/Seita.2G081100/Seita.2G112700/Seita.2G334200/Seita.2G397800/Seita.2G410400/Seita.3G012800/Seita.3G044000/Seita.3G136000/Seita.3G136800/Seita.3G211800/Seita.3G237000/Seita.3G280300/Seita.3G388100/Seita.3G397200/Seita.4G066100/Seita.4G072100/Seita.4G2…	60
brown	BP	GO:0043622	cortical microtubule organization	11/1315	31/9983	0.00134931	0.0379574	0.0361	Seita.1G214200/Seita.1G235000/Seita.1G265000/Seita.2G242500/Seita.3G029800/Seita.3G044000/Seita.4G093800/Seita.4G136600/Seita.5G273100/Seita.7G160500/Seita.9G053400	11
brown	BP	GO:0009742	brassinosteroid mediated signaling pathway	15/1315	50/9983	0.00142827	0.039706	0.037763	Seita.1G064600/Seita.3G126100/Seita.3G382500/Seita.4G177000/Seita.4G286300/Seita.5G044400/Seita.5G050500/Seita.5G145300/Seita.5G152100/Seita.5G226700/Seita.6G098100/Seita.6G188100/Seita.9G029000/Seita.9G408500/Seita.J001400	15
brown	BP	GO:0010496	intercellular transport	9/1315	23/9983	0.00167427	0.0460034	0.0437522	Seita.2G242500/Seita.3G012800/Seita.3G250700/Seita.3G294700/Seita.3G314700/Seita.5G454800/Seita.5G455000/Seita.6G001600/Seita.9G109500	9
brown	CC	GO:0005856	cytoskeleton	96/1342	317/9955	2.02678e-15	7.23562e-13	6.37903e-13	Seita.1G005900/Seita.1G023900/Seita.1G027900/Seita.1G111600/Seita.1G220000/Seita.1G235000/Seita.1G252700/Seita.1G280400/Seita.1G310000/Seita.1G311900/Seita.1G315000/Seita.1G337400/Seita.1G365900/Seita.2G031200/Seita.2G144200/Seita.2G195700/Seita.2G207800/Seita.2G242500/Seita.2G334200/Seita.2G364600/Seita.3G027400/Seita.3G029800/Seita.3G044000/Seita.3G046100/Seita.3G069200/Seita.3G109700/Seita.3G1…	96
brown	CC	GO:0044430	cytoskeletal part	78/1342	264/9955	3.90445e-12	5.04029e-10	4.4436e-10	Seita.1G005900/Seita.1G023900/Seita.1G027900/Seita.1G111600/Seita.1G220000/Seita.1G235000/Seita.1G252700/Seita.1G280400/Seita.1G310000/Seita.1G311900/Seita.1G315000/Seita.1G337400/Seita.1G365900/Seita.2G031200/Seita.2G144200/Seita.2G195700/Seita.2G207800/Seita.2G334200/Seita.3G027400/Seita.3G029800/Seita.3G044000/Seita.3G046100/Seita.3G109700/Seita.3G152400/Seita.3G165400/Seita.3G211800/Seita.3G3…	78
brown	CC	GO:0015630	microtubule cytoskeleton	69/1342	221/9955	4.23554e-12	5.04029e-10	4.4436e-10	Seita.1G005900/Seita.1G027900/Seita.1G111600/Seita.1G235000/Seita.1G252700/Seita.1G280400/Seita.1G310000/Seita.1G311900/Seita.1G315000/Seita.1G337400/Seita.2G031200/Seita.2G144200/Seita.2G195700/Seita.2G207800/Seita.2G242500/Seita.2G334200/Seita.3G027400/Seita.3G029800/Seita.3G044000/Seita.3G046100/Seita.3G109700/Seita.3G152400/Seita.3G165400/Seita.3G312900/Seita.3G340900/Seita.3G389800/Seita.3G4…	69
brown	CC	GO:0099513	polymeric cytoskeletal fiber	41/1342	101/9955	1.10482e-11	9.86048e-10	8.69315e-10	Seita.1G005900/Seita.1G023900/Seita.1G111600/Seita.1G235000/Seita.1G252700/Seita.1G311900/Seita.1G315000/Seita.1G337400/Seita.2G031200/Seita.2G144200/Seita.2G195700/Seita.2G207800/Seita.2G334200/Seita.3G029800/Seita.3G044000/Seita.3G046100/Seita.3G152400/Seita.3G389800/Seita.3G409200/Seita.4G069300/Seita.4G093800/Seita.4G107800/Seita.4G136600/Seita.5G162900/Seita.5G180900/Seita.5G395100/Seita.6G2…	41
brown	CC	GO:0098791	Golgi subcompartment	83/1342	303/9955	6.06096e-11	4.30196e-09	3.79268e-09	Seita.1G080700/Seita.1G150400/Seita.1G165500/Seita.1G207400/Seita.1G232400/Seita.1G248500/Seita.1G267600/Seita.1G283700/Seita.1G300500/Seita.1G316100/Seita.1G344300/Seita.1G378800/Seita.2G003400/Seita.2G203200/Seita.2G205500/Seita.2G218000/Seita.2G282000/Seita.2G322100/Seita.2G323900/Seita.2G356200/Seita.2G443600/Seita.3G001700/Seita.3G012800/Seita.3G015000/Seita.3G046000/Seita.3G074800/Seita.3G1…	83
brown	CC	GO:0005874	microtubule	37/1342	90/9955	7.23019e-11	4.30196e-09	3.79268e-09	Seita.1G005900/Seita.1G111600/Seita.1G235000/Seita.1G252700/Seita.1G311900/Seita.1G315000/Seita.1G337400/Seita.2G031200/Seita.2G144200/Seita.2G195700/Seita.2G207800/Seita.2G334200/Seita.3G029800/Seita.3G044000/Seita.3G046100/Seita.3G152400/Seita.3G389800/Seita.3G409200/Seita.4G069300/Seita.4G093800/Seita.4G107800/Seita.4G136600/Seita.5G162900/Seita.5G395100/Seita.6G222800/Seita.6G237500/Seita.7G1…	37
brown	CC	GO:0044431	Golgi apparatus part	88/1342	331/9955	8.83126e-11	4.50394e-09	3.97075e-09	Seita.1G080700/Seita.1G150400/Seita.1G165500/Seita.1G207400/Seita.1G232400/Seita.1G248500/Seita.1G267600/Seita.1G283700/Seita.1G300500/Seita.1G316100/Seita.1G344300/Seita.1G378800/Seita.2G003400/Seita.2G203200/Seita.2G205500/Seita.2G218000/Seita.2G282000/Seita.2G322100/Seita.2G323900/Seita.2G356200/Seita.2G443600/Seita.3G001700/Seita.3G012800/Seita.3G015000/Seita.3G046000/Seita.3G074800/Seita.3G1…	88
brown	CC	GO:0099081	supramolecular polymer	41/1342	116/9955	1.7088e-09	6.77826e-08	5.97582e-08	Seita.1G005900/Seita.1G023900/Seita.1G111600/Seita.1G235000/Seita.1G252700/Seita.1G311900/Seita.1G315000/Seita.1G337400/Seita.2G031200/Seita.2G144200/Seita.2G195700/Seita.2G207800/Seita.2G334200/Seita.3G029800/Seita.3G044000/Seita.3G046100/Seita.3G152400/Seita.3G389800/Seita.3G409200/Seita.4G069300/Seita.4G093800/Seita.4G107800/Seita.4G136600/Seita.5G162900/Seita.5G180900/Seita.5G395100/Seita.6G2…	41
brown	CC	GO:0099512	supramolecular fiber	41/1342	116/9955	1.7088e-09	6.77826e-08	5.97582e-08	Seita.1G005900/Seita.1G023900/Seita.1G111600/Seita.1G235000/Seita.1G252700/Seita.1G311900/Seita.1G315000/Seita.1G337400/Seita.2G031200/Seita.2G144200/Seita.2G195700/Seita.2G207800/Seita.2G334200/Seita.3G029800/Seita.3G044000/Seita.3G046100/Seita.3G152400/Seita.3G389800/Seita.3G409200/Seita.4G069300/Seita.4G093800/Seita.4G107800/Seita.4G136600/Seita.5G162900/Seita.5G180900/Seita.5G395100/Seita.6G2…	41
brown	CC	GO:0099080	supramolecular complex	41/1342	120/9955	5.40242e-09	1.92866e-07	1.70034e-07	Seita.1G005900/Seita.1G023900/Seita.1G111600/Seita.1G235000/Seita.1G252700/Seita.1G311900/Seita.1G315000/Seita.1G337400/Seita.2G031200/Seita.2G144200/Seita.2G195700/Seita.2G207800/Seita.2G334200/Seita.3G029800/Seita.3G044000/Seita.3G046100/Seita.3G152400/Seita.3G389800/Seita.3G409200/Seita.4G069300/Seita.4G093800/Seita.4G107800/Seita.4G136600/Seita.5G162900/Seita.5G180900/Seita.5G395100/Seita.6G2…	41
brown	CC	GO:0005875	microtubule associated complex	32/1342	83/9955	9.26188e-09	3.0059e-07	2.65005e-07	Seita.1G027900/Seita.1G252700/Seita.1G280400/Seita.1G310000/Seita.1G337400/Seita.2G144200/Seita.2G207800/Seita.3G027400/Seita.3G029800/Seita.3G044000/Seita.3G109700/Seita.3G165400/Seita.3G340900/Seita.4G026500/Seita.4G163700/Seita.5G055100/Seita.5G162900/Seita.5G233200/Seita.5G295800/Seita.5G314600/Seita.6G237500/Seita.7G102100/Seita.7G183000/Seita.7G204000/Seita.7G219300/Seita.7G248700/Seita.7G2…	32
brown	CC	GO:0097708	intracellular vesicle	103/1342	471/9955	2.15837e-07	6.42115e-06	5.66098e-06	Seita.1G080700/Seita.1G081800/Seita.1G150400/Seita.1G165500/Seita.1G175200/Seita.1G248500/Seita.1G267600/Seita.1G283700/Seita.1G300500/Seita.1G314200/Seita.1G344300/Seita.1G355400/Seita.2G003400/Seita.2G031200/Seita.2G071400/Seita.2G127000/Seita.2G138800/Seita.2G153100/Seita.2G207600/Seita.2G269500/Seita.2G282900/Seita.2G283200/Seita.2G313000/Seita.2G322100/Seita.2G323900/Seita.2G325500/Seita.2G3…	103
brown	CC	GO:0031410	cytoplasmic vesicle	102/1342	466/9955	2.36501e-07	6.49468e-06	5.72581e-06	Seita.1G080700/Seita.1G081800/Seita.1G150400/Seita.1G165500/Seita.1G175200/Seita.1G248500/Seita.1G267600/Seita.1G283700/Seita.1G300500/Seita.1G314200/Seita.1G344300/Seita.1G355400/Seita.2G003400/Seita.2G031200/Seita.2G071400/Seita.2G127000/Seita.2G138800/Seita.2G153100/Seita.2G207600/Seita.2G269500/Seita.2G282900/Seita.2G283200/Seita.2G313000/Seita.2G322100/Seita.2G323900/Seita.2G325500/Seita.2G3…	102
brown	CC	GO:0005802	trans-Golgi network	59/1342	230/9955	4.49274e-07	1.14565e-05	1.01002e-05	Seita.1G080700/Seita.1G150400/Seita.1G165500/Seita.1G207400/Seita.1G248500/Seita.1G267600/Seita.1G283700/Seita.1G300500/Seita.1G344300/Seita.1G378800/Seita.2G003400/Seita.2G203200/Seita.2G322100/Seita.2G323900/Seita.2G356200/Seita.3G001700/Seita.3G012800/Seita.3G015000/Seita.3G074800/Seita.3G102600/Seita.3G158400/Seita.3G158500/Seita.3G187600/Seita.3G217800/Seita.3G228400/Seita.3G255600/Seita.3G2…	59
brown	CC	GO:0030981	cortical microtubule cytoskeleton	12/1342	19/9955	6.92899e-07	1.6491e-05	1.45387e-05	Seita.1G311900/Seita.2G031200/Seita.2G144200/Seita.2G334200/Seita.3G029800/Seita.3G409200/Seita.4G093800/Seita.4G136600/Seita.7G156700/Seita.7G334100/Seita.8G060500/Seita.9G053400	12
brown	CC	GO:0005768	endosome	82/1342	361/9955	7.78065e-07	1.73606e-05	1.53054e-05	Seita.1G080700/Seita.1G081800/Seita.1G150400/Seita.1G165500/Seita.1G175200/Seita.1G248500/Seita.1G267600/Seita.1G283700/Seita.1G300500/Seita.1G344300/Seita.1G355400/Seita.2G003400/Seita.2G071400/Seita.2G138800/Seita.2G153100/Seita.2G207600/Seita.2G282900/Seita.2G283200/Seita.2G313000/Seita.2G322100/Seita.2G323900/Seita.2G356200/Seita.2G400000/Seita.2G406100/Seita.3G001700/Seita.3G012800/Seita.3G0…	82
brown	CC	GO:0005871	kinesin complex	23/1342	59/9955	8.9226e-07	1.87375e-05	1.65192e-05	Seita.1G027900/Seita.1G252700/Seita.1G337400/Seita.2G144200/Seita.2G207800/Seita.3G029800/Seita.3G044000/Seita.3G340900/Seita.4G026500/Seita.4G163700/Seita.5G055100/Seita.5G162900/Seita.5G233200/Seita.5G314600/Seita.6G237500/Seita.7G102100/Seita.7G183000/Seita.7G248700/Seita.7G267000/Seita.8G129000/Seita.8G215500/Seita.9G073300/Seita.9G536800	23
brown	CC	GO:0031982	vesicle	105/1342	497/9955	9.5648e-07	1.89702e-05	1.67244e-05	Seita.1G080700/Seita.1G081800/Seita.1G150400/Seita.1G165500/Seita.1G175200/Seita.1G248500/Seita.1G267600/Seita.1G283700/Seita.1G300500/Seita.1G314200/Seita.1G344300/Seita.1G355400/Seita.2G003400/Seita.2G031200/Seita.2G071400/Seita.2G127000/Seita.2G138800/Seita.2G153100/Seita.2G207600/Seita.2G269500/Seita.2G282900/Seita.2G283200/Seita.2G313000/Seita.2G322100/Seita.2G323900/Seita.2G325500/Seita.2G3…	105
brown	CC	GO:0055028	cortical microtubule	11/1342	17/9955	1.45778e-06	2.73908e-05	2.41482e-05	Seita.1G311900/Seita.2G031200/Seita.2G144200/Seita.2G334200/Seita.3G029800/Seita.3G409200/Seita.4G093800/Seita.4G136600/Seita.7G156700/Seita.8G060500/Seita.9G053400	11
brown	CC	GO:1990752	microtubule end	8/1342	12/9955	3.19524e-05	0.00057035	0.000502829	Seita.1G252700/Seita.1G337400/Seita.4G093800/Seita.5G162900/Seita.6G237500/Seita.7G102100/Seita.7G183000/Seita.7G267000	8
brown	CC	GO:0000139	Golgi membrane	31/1342	112/9955	5.10804e-05	0.000868366	0.000765566	Seita.1G232400/Seita.1G316100/Seita.2G205500/Seita.2G218000/Seita.2G282000/Seita.2G322100/Seita.2G443600/Seita.3G012800/Seita.3G046000/Seita.3G074800/Seita.3G135800/Seita.3G274000/Seita.4G185700/Seita.5G127100/Seita.5G157500/Seita.5G268500/Seita.5G371100/Seita.5G388900/Seita.6G001600/Seita.6G065800/Seita.6G085400/Seita.6G235900/Seita.7G264400/Seita.7G287400/Seita.8G045900/Seita.8G145700/Seita.9G1…	31
brown	CC	GO:0009505	plant-type cell wall	51/1342	220/9955	5.42247e-05	0.000879919	0.00077575	Seita.1G079000/Seita.1G092000/Seita.1G099100/Seita.1G287600/Seita.1G380000/Seita.2G081100/Seita.2G159100/Seita.2G236400/Seita.2G380300/Seita.2G404000/Seita.2G439200/Seita.3G012800/Seita.3G061000/Seita.3G101400/Seita.3G146800/Seita.3G240700/Seita.3G294700/Seita.3G347500/Seita.4G101300/Seita.4G160700/Seita.4G255800/Seita.5G053200/Seita.5G162900/Seita.5G181100/Seita.5G338000/Seita.5G360800/Seita.5G3…	51
brown	CC	GO:0035371	microtubule plus-end	7/1342	11/9955	0.000160076	0.00248465	0.00219051	Seita.1G252700/Seita.1G337400/Seita.5G162900/Seita.6G237500/Seita.7G102100/Seita.7G183000/Seita.7G267000	7
brown	CC	GO:0046658	anchored component of plasma membrane	31/1342	119/9955	0.000174674	0.00259828	0.00229068	Seita.1G092000/Seita.1G322500/Seita.2G159100/Seita.2G305100/Seita.2G327700/Seita.2G351200/Seita.2G366200/Seita.2G380300/Seita.2G412000/Seita.3G146800/Seita.3G182000/Seita.3G217100/Seita.3G263500/Seita.4G173100/Seita.5G311700/Seita.5G376800/Seita.5G390300/Seita.5G448400/Seita.6G113100/Seita.6G201700/Seita.7G051500/Seita.9G088500/Seita.9G120900/Seita.9G145500/Seita.9G233400/Seita.9G274400/Seita.9G3…	31
brown	CC	GO:0005881	cytoplasmic microtubule	11/1342	25/9955	0.000186159	0.00265836	0.00234365	Seita.1G311900/Seita.2G031200/Seita.2G144200/Seita.2G334200/Seita.3G029800/Seita.3G409200/Seita.4G093800/Seita.4G136600/Seita.7G156700/Seita.8G060500/Seita.9G053400	11
brown	CC	GO:0005618	cell wall	93/1342	490/9955	0.000293174	0.00402551	0.00354895	Seita.1G079000/Seita.1G092000/Seita.1G099100/Seita.1G248900/Seita.1G287600/Seita.1G314300/Seita.1G316400/Seita.1G323700/Seita.1G378600/Seita.1G380000/Seita.2G081100/Seita.2G159100/Seita.2G225500/Seita.2G236400/Seita.2G290500/Seita.2G380300/Seita.2G404000/Seita.2G439200/Seita.3G012800/Seita.3G061000/Seita.3G072000/Seita.3G101400/Seita.3G146800/Seita.3G165300/Seita.3G233200/Seita.3G233300/Seita.3G2…	93
brown	CC	GO:0030312	external encapsulating structure	93/1342	491/9955	0.000315292	0.00416886	0.00367533	Seita.1G079000/Seita.1G092000/Seita.1G099100/Seita.1G248900/Seita.1G287600/Seita.1G314300/Seita.1G316400/Seita.1G323700/Seita.1G378600/Seita.1G380000/Seita.2G081100/Seita.2G159100/Seita.2G225500/Seita.2G236400/Seita.2G290500/Seita.2G380300/Seita.2G404000/Seita.2G439200/Seita.3G012800/Seita.3G061000/Seita.3G072000/Seita.3G101400/Seita.3G146800/Seita.3G165300/Seita.3G233200/Seita.3G233300/Seita.3G2…	93
brown	CC	GO:0019898	extrinsic component of membrane	19/1342	64/9955	0.000543957	0.00693545	0.0061144	Seita.1G150200/Seita.1G319900/Seita.2G138800/Seita.2G216300/Seita.2G303200/Seita.3G105200/Seita.3G169400/Seita.3G211800/Seita.3G312900/Seita.3G382500/Seita.4G009500/Seita.4G115600/Seita.5G118500/Seita.5G272100/Seita.5G442100/Seita.7G026400/Seita.9G145400/Seita.9G205900/Seita.9G417500	19
brown	CC	GO:0005795	Golgi stack	12/1342	33/9955	0.0007888	0.0097104	0.00856085	Seita.1G150400/Seita.1G207400/Seita.2G203200/Seita.2G205500/Seita.2G218000/Seita.3G343800/Seita.5G162900/Seita.5G394000/Seita.6G096900/Seita.7G026500/Seita.7G267000/Seita.8G145700	12
brown	CC	GO:0044459	plasma membrane part	78/1342	415/9955	0.00118545	0.0141069	0.0124369	Seita.1G025100/Seita.1G092000/Seita.1G116200/Seita.1G116500/Seita.1G135500/Seita.1G135700/Seita.1G322500/Seita.2G123000/Seita.2G151300/Seita.2G159100/Seita.2G210700/Seita.2G216300/Seita.2G305100/Seita.2G322700/Seita.2G327700/Seita.2G351200/Seita.2G366200/Seita.2G380300/Seita.2G412000/Seita.3G068600/Seita.3G136000/Seita.3G146800/Seita.3G169400/Seita.3G182000/Seita.3G211800/Seita.3G217100/Seita.3G2…	78
brown	CC	GO:0009524	phragmoplast	18/1342	63/9955	0.00123773	0.0142539	0.0125665	Seita.1G235000/Seita.2G031200/Seita.3G012800/Seita.3G029800/Seita.3G062300/Seita.3G152400/Seita.4G046200/Seita.4G136600/Seita.5G395100/Seita.6G001600/Seita.6G222800/Seita.7G160500/Seita.7G248700/Seita.8G054100/Seita.9G114600/Seita.9G274200/Seita.9G475700/Seita.9G499700	18
brown	CC	GO:0044448	cell cortex part	17/1342	59/9955	0.0015121	0.0164421	0.0144956	Seita.1G311900/Seita.2G031200/Seita.2G075800/Seita.2G144200/Seita.2G322700/Seita.2G334200/Seita.2G357000/Seita.3G029800/Seita.3G211800/Seita.3G409200/Seita.4G093800/Seita.4G136600/Seita.7G096300/Seita.7G156700/Seita.7G334100/Seita.8G060500/Seita.9G053400	17
brown	CC	GO:0010008	endosome membrane	23/1342	90/9955	0.00151986	0.0164421	0.0144956	Seita.1G081800/Seita.1G248500/Seita.2G138800/Seita.2G153100/Seita.2G283200/Seita.2G313000/Seita.2G400000/Seita.2G406100/Seita.3G012800/Seita.3G015000/Seita.3G105200/Seita.3G312900/Seita.4G115600/Seita.4G185700/Seita.5G027400/Seita.5G157500/Seita.6G001600/Seita.8G045900/Seita.8G090800/Seita.9G159700/Seita.9G213400/Seita.9G240200/Seita.9G510500	23
brown	CC	GO:0031225	anchored component of membrane	32/1342	142/9955	0.00205851	0.0216144	0.0190556	Seita.1G092000/Seita.1G322500/Seita.2G159100/Seita.2G305100/Seita.2G327700/Seita.2G351200/Seita.2G366200/Seita.2G380300/Seita.2G412000/Seita.3G146800/Seita.3G182000/Seita.3G217100/Seita.3G263500/Seita.4G173100/Seita.5G311700/Seita.5G376800/Seita.5G390300/Seita.5G448400/Seita.6G113100/Seita.6G201700/Seita.7G051500/Seita.7G272500/Seita.9G088500/Seita.9G120900/Seita.9G145500/Seita.9G233400/Seita.9G2…	32
brown	CC	GO:0030863	cortical cytoskeleton	13/1342	42/9955	0.00263594	0.0268866	0.0237036	Seita.1G311900/Seita.2G031200/Seita.2G144200/Seita.2G334200/Seita.3G029800/Seita.3G211800/Seita.3G409200/Seita.4G093800/Seita.4G136600/Seita.7G156700/Seita.7G334100/Seita.8G060500/Seita.9G053400	13
brown	CC	GO:0005938	cell cortex	28/1342	122/9955	0.0028756	0.0285163	0.0251405	Seita.1G116200/Seita.1G116500/Seita.1G235000/Seita.1G311900/Seita.2G031200/Seita.2G075800/Seita.2G144200/Seita.2G322700/Seita.2G334200/Seita.2G357000/Seita.3G029800/Seita.3G068600/Seita.3G211800/Seita.3G409200/Seita.4G072100/Seita.4G093800/Seita.4G136600/Seita.5G351800/Seita.6G251100/Seita.7G096300/Seita.7G156700/Seita.7G160500/Seita.7G334100/Seita.8G060500/Seita.9G053400/Seita.9G118000/Seita.9G2…	28
brown	CC	GO:0099568	cytoplasmic region	29/1342	131/9955	0.00427033	0.0412029	0.0363251	Seita.1G116200/Seita.1G116500/Seita.1G235000/Seita.1G311900/Seita.2G031200/Seita.2G075800/Seita.2G144200/Seita.2G322700/Seita.2G334200/Seita.2G357000/Seita.3G029800/Seita.3G068600/Seita.3G211800/Seita.3G409200/Seita.4G072100/Seita.4G093800/Seita.4G136600/Seita.5G351800/Seita.6G251100/Seita.7G096300/Seita.7G156700/Seita.7G160500/Seita.7G334100/Seita.8G060500/Seita.9G053400/Seita.9G118000/Seita.9G2…	29
brown	CC	GO:0044433	cytoplasmic vesicle part	35/1342	167/9955	0.00467601	0.0439298	0.0387292	Seita.1G081800/Seita.1G248500/Seita.2G127000/Seita.2G138800/Seita.2G153100/Seita.2G283200/Seita.2G313000/Seita.2G400000/Seita.2G406100/Seita.3G012800/Seita.3G015000/Seita.3G105200/Seita.3G312900/Seita.3G343800/Seita.4G115600/Seita.4G185700/Seita.4G227600/Seita.4G291000/Seita.5G027400/Seita.5G064600/Seita.5G157500/Seita.5G286700/Seita.5G371100/Seita.5G402400/Seita.6G001600/Seita.8G045900/Seita.8G0…	35
brown	CC	GO:0044440	endosomal part	24/1342	104/9955	0.0051437	0.0470846	0.0415105	Seita.1G081800/Seita.1G248500/Seita.2G138800/Seita.2G153100/Seita.2G283200/Seita.2G313000/Seita.2G400000/Seita.2G406100/Seita.3G012800/Seita.3G015000/Seita.3G105200/Seita.3G312900/Seita.4G115600/Seita.4G185700/Seita.5G027400/Seita.5G157500/Seita.6G001600/Seita.8G045900/Seita.8G090800/Seita.9G100300/Seita.9G159700/Seita.9G213400/Seita.9G240200/Seita.9G510500	24
brown	MF	GO:0008092	cytoskeletal protein binding	57/1096	185/8539	7.52263e-11	4.39322e-08	4.24435e-08	Seita.1G111600/Seita.1G235000/Seita.1G310000/Seita.1G311900/Seita.1G314200/Seita.1G315000/Seita.1G365900/Seita.2G157700/Seita.2G195700/Seita.2G207800/Seita.2G334200/Seita.3G029800/Seita.3G046100/Seita.3G072000/Seita.3G152400/Seita.3G328400/Seita.3G340900/Seita.3G389800/Seita.3G409200/Seita.4G066100/Seita.4G069300/Seita.4G072100/Seita.4G093800/Seita.4G107800/Seita.5G162900/Seita.5G180900/Seita.5G3…	57
brown	MF	GO:0008017	microtubule binding	31/1096	73/8539	2.69052e-10	7.85631e-08	7.59009e-08	Seita.1G111600/Seita.1G235000/Seita.1G311900/Seita.1G314200/Seita.1G315000/Seita.2G195700/Seita.2G207800/Seita.2G334200/Seita.3G029800/Seita.3G046100/Seita.3G152400/Seita.3G340900/Seita.3G389800/Seita.3G409200/Seita.4G069300/Seita.4G093800/Seita.4G107800/Seita.5G162900/Seita.5G395100/Seita.7G160500/Seita.7G248700/Seita.7G267000/Seita.9G053400/Seita.9G114600/Seita.9G118000/Seita.9G155400/Seita.9G1…	31
brown	MF	GO:0015631	tubulin binding	32/1096	84/8539	3.73301e-09	7.26693e-07	7.02068e-07	Seita.1G111600/Seita.1G235000/Seita.1G311900/Seita.1G314200/Seita.1G315000/Seita.2G195700/Seita.2G207800/Seita.2G334200/Seita.3G029800/Seita.3G046100/Seita.3G152400/Seita.3G340900/Seita.3G389800/Seita.3G409200/Seita.4G069300/Seita.4G093800/Seita.4G107800/Seita.5G162900/Seita.5G395100/Seita.7G156700/Seita.7G160500/Seita.7G248700/Seita.7G267000/Seita.9G053400/Seita.9G114600/Seita.9G118000/Seita.9G1…	32
brown	MF	GO:0003777	microtubule motor activity	23/1096	59/8539	3.61637e-07	5.2799e-05	5.10098e-05	Seita.1G027900/Seita.1G252700/Seita.1G337400/Seita.2G144200/Seita.2G207800/Seita.3G029800/Seita.3G044000/Seita.3G340900/Seita.4G026500/Seita.4G163700/Seita.5G055100/Seita.5G162900/Seita.5G233200/Seita.5G314600/Seita.6G237500/Seita.7G102100/Seita.7G183000/Seita.7G248700/Seita.7G267000/Seita.8G129000/Seita.8G215500/Seita.9G073300/Seita.9G536800	23
brown	MF	GO:0003774	motor activity	23/1096	64/8539	1.94274e-06	0.000226912	0.000219223	Seita.1G027900/Seita.1G252700/Seita.1G337400/Seita.2G144200/Seita.2G207800/Seita.3G029800/Seita.3G044000/Seita.3G340900/Seita.4G026500/Seita.4G163700/Seita.5G055100/Seita.5G162900/Seita.5G233200/Seita.5G314600/Seita.6G237500/Seita.7G102100/Seita.7G183000/Seita.7G248700/Seita.7G267000/Seita.8G129000/Seita.8G215500/Seita.9G073300/Seita.9G536800	23
brown	MF	GO:0001871	pattern binding	21/1096	60/8539	8.73206e-06	0.000728504	0.000703817	Seita.1G092000/Seita.2G159100/Seita.2G258500/Seita.2G327700/Seita.2G366200/Seita.2G380300/Seita.3G182000/Seita.3G217100/Seita.3G263500/Seita.4G173100/Seita.5G311700/Seita.5G376800/Seita.5G390300/Seita.5G448400/Seita.6G113100/Seita.6G209900/Seita.9G145500/Seita.9G274400/Seita.9G363400/Seita.9G438100/Seita.9G487200	21
brown	MF	GO:0030247	polysaccharide binding	21/1096	60/8539	8.73206e-06	0.000728504	0.000703817	Seita.1G092000/Seita.2G159100/Seita.2G258500/Seita.2G327700/Seita.2G366200/Seita.2G380300/Seita.3G182000/Seita.3G217100/Seita.3G263500/Seita.4G173100/Seita.5G311700/Seita.5G376800/Seita.5G390300/Seita.5G448400/Seita.6G113100/Seita.6G209900/Seita.9G145500/Seita.9G274400/Seita.9G363400/Seita.9G438100/Seita.9G487200	21
brown	MF	GO:0003779	actin binding	20/1096	64/8539	9.12499e-05	0.00666124	0.00643552	Seita.1G365900/Seita.3G029800/Seita.3G072000/Seita.3G340900/Seita.4G066100/Seita.4G072100/Seita.5G180900/Seita.5G414700/Seita.7G125600/Seita.7G163400/Seita.7G179500/Seita.7G227100/Seita.7G265800/Seita.9G123600/Seita.9G266000/Seita.9G274200/Seita.9G383900/Seita.9G398900/Seita.9G454700/Seita.9G499700	20
brown	MF	GO:0004888	transmembrane signaling receptor activity	34/1096	138/8539	0.000104418	0.0067756	0.006546	Seita.1G067300/Seita.1G113000/Seita.1G305000/Seita.1G364400/Seita.2G153100/Seita.2G191800/Seita.2G219000/Seita.2G353200/Seita.3G074400/Seita.3G123700/Seita.3G258700/Seita.4G086700/Seita.4G186200/Seita.4G199000/Seita.5G048600/Seita.5G059600/Seita.5G074100/Seita.5G146300/Seita.5G310800/Seita.5G312500/Seita.5G433200/Seita.6G096700/Seita.6G164900/Seita.7G239900/Seita.8G093700/Seita.9G029000/Seita.9G1…	34
brown	MF	GO:0030246	carbohydrate binding	23/1096	80/8539	0.000117947	0.00688808	0.00665467	Seita.1G092000/Seita.2G159100/Seita.2G258500/Seita.2G327700/Seita.2G366200/Seita.2G380300/Seita.3G182000/Seita.3G217100/Seita.3G263500/Seita.4G173100/Seita.5G311700/Seita.5G376800/Seita.5G390300/Seita.5G448400/Seita.6G063500/Seita.6G113100/Seita.6G209900/Seita.8G123700/Seita.9G145500/Seita.9G274400/Seita.9G363400/Seita.9G438100/Seita.9G487200	23
brown	MF	GO:0030674	protein binding, bridging	11/1096	26/8539	0.000181497	0.00963585	0.00930933	Seita.2G325500/Seita.2G367900/Seita.3G019400/Seita.3G020900/Seita.3G402600/Seita.4G274100/Seita.7G286200/Seita.8G016500/Seita.8G049400/Seita.9G143300/Seita.9G143400	11
brown	MF	GO:0016798	hydrolase activity, acting on glycosyl bonds	52/1096	249/8539	0.000211348	0.0102856	0.00993707	Seita.1G092000/Seita.1G164200/Seita.1G310200/Seita.1G316100/Seita.1G323700/Seita.2G159100/Seita.2G290500/Seita.2G327700/Seita.2G366200/Seita.2G380300/Seita.2G439200/Seita.3G061000/Seita.3G074800/Seita.3G134400/Seita.3G182000/Seita.3G233200/Seita.3G233300/Seita.3G240700/Seita.3G261000/Seita.3G263500/Seita.3G288600/Seita.3G302400/Seita.4G008300/Seita.4G105300/Seita.4G173100/Seita.4G255800/Seita.5G1…	52
brown	MF	GO:0051015	actin filament binding	15/1096	44/8539	0.000233799	0.010503	0.0101471	Seita.1G365900/Seita.3G029800/Seita.3G072000/Seita.4G066100/Seita.5G180900/Seita.5G414700/Seita.7G163400/Seita.7G179500/Seita.7G227100/Seita.7G265800/Seita.9G123600/Seita.9G266000/Seita.9G383900/Seita.9G398900/Seita.9G454700	15
brown	MF	GO:0016757	transferase activity, transferring glycosyl groups	57/1096	283/8539	0.000290517	0.0121187	0.0117081	Seita.1G054000/Seita.1G165500/Seita.1G184900/Seita.1G202600/Seita.1G277200/Seita.1G378600/Seita.2G112900/Seita.2G197800/Seita.2G209100/Seita.2G210000/Seita.2G265800/Seita.2G301800/Seita.2G347700/Seita.2G356200/Seita.2G362400/Seita.2G443600/Seita.3G046000/Seita.3G102600/Seita.3G158400/Seita.3G158500/Seita.3G217800/Seita.3G337900/Seita.4G043100/Seita.4G045200/Seita.4G055200/Seita.4G099300/Seita.4G0…	57
brown	MF	GO:0038023	signaling receptor activity	37/1096	169/8539	0.000664243	0.0258612	0.0249848	Seita.1G067300/Seita.1G113000/Seita.1G305000/Seita.1G364400/Seita.2G001000/Seita.2G153100/Seita.2G191800/Seita.2G219000/Seita.2G353200/Seita.3G019900/Seita.3G037200/Seita.3G074400/Seita.3G123700/Seita.3G258700/Seita.4G086700/Seita.4G186200/Seita.4G199000/Seita.5G048600/Seita.5G059600/Seita.5G074100/Seita.5G146300/Seita.5G310800/Seita.5G312500/Seita.5G433200/Seita.6G096700/Seita.6G164900/Seita.7G2…	37
brown	MF	GO:0015020	glucuronosyltransferase activity	7/1096	14/8539	0.000849834	0.0310189	0.0299678	Seita.2G356200/Seita.3G158400/Seita.3G158500/Seita.3G217800/Seita.5G402400/Seita.5G437200/Seita.9G574200	7
brown	MF	GO:0004553	hydrolase activity, hydrolyzing O-glycosyl compounds	46/1096	228/8539	0.00104506	0.0350908	0.0339017	Seita.1G092000/Seita.1G310200/Seita.1G316100/Seita.1G323700/Seita.2G159100/Seita.2G290500/Seita.2G327700/Seita.2G366200/Seita.2G380300/Seita.2G439200/Seita.3G061000/Seita.3G074800/Seita.3G182000/Seita.3G233200/Seita.3G233300/Seita.3G240700/Seita.3G263500/Seita.3G288600/Seita.3G302400/Seita.4G173100/Seita.4G255800/Seita.5G157600/Seita.5G189300/Seita.5G260400/Seita.5G311700/Seita.5G316000/Seita.5G3…	46
brown	MF	GO:0060090	molecular adaptor activity	11/1096	31/8539	0.00108156	0.0350908	0.0339017	Seita.2G325500/Seita.2G367900/Seita.3G019400/Seita.3G020900/Seita.3G402600/Seita.4G274100/Seita.7G286200/Seita.8G016500/Seita.8G049400/Seita.9G143300/Seita.9G143400	11
brown	MF	GO:0016758	transferase activity, transferring hexosyl groups	48/1096	242/8539	0.00120522	0.0370445	0.0357892	Seita.1G054000/Seita.1G165500/Seita.1G184900/Seita.1G202600/Seita.1G277200/Seita.1G378600/Seita.2G197800/Seita.2G209100/Seita.2G347700/Seita.2G356200/Seita.2G362400/Seita.3G102600/Seita.3G158400/Seita.3G158500/Seita.3G217800/Seita.3G337900/Seita.4G043100/Seita.4G045200/Seita.4G055200/Seita.4G099300/Seita.4G099700/Seita.4G211400/Seita.4G213700/Seita.4G271600/Seita.4G286800/Seita.5G315400/Seita.5G3…	48
brown	MF	GO:0060089	molecular transducer activity	43/1096	212/8539	0.00134509	0.0392767	0.0379458	Seita.1G067300/Seita.1G113000/Seita.1G146600/Seita.1G305000/Seita.1G364400/Seita.1G377700/Seita.2G001000/Seita.2G153100/Seita.2G191800/Seita.2G219000/Seita.2G318500/Seita.2G353200/Seita.3G019900/Seita.3G037200/Seita.3G074400/Seita.3G109200/Seita.3G123700/Seita.3G258700/Seita.4G086700/Seita.4G186200/Seita.4G199000/Seita.5G048600/Seita.5G059600/Seita.5G074100/Seita.5G146300/Seita.5G310800/Seita.5G3…	43
cyan	BP	GO:0016192	vesicle-mediated transport	37/181	355/9983	1.81841e-18	2.47304e-15	1.97919e-15	Seita.1G101800/Seita.1G151300/Seita.1G200100/Seita.1G356700/Seita.1G366200/Seita.2G311400/Seita.2G354300/Seita.2G393200/Seita.2G399300/Seita.3G007900/Seita.3G035000/Seita.3G088400/Seita.3G212600/Seita.4G032400/Seita.4G059700/Seita.4G080900/Seita.5G038000/Seita.5G226600/Seita.5G247900/Seita.5G314900/Seita.5G398100/Seita.5G420100/Seita.5G469900/Seita.6G043600/Seita.6G115500/Seita.7G040600/Seita.9G0…	37
cyan	BP	GO:0048193	Golgi vesicle transport	20/181	102/9983	1.1736e-15	7.98051e-13	6.38688e-13	Seita.1G101800/Seita.1G151300/Seita.2G311400/Seita.2G393200/Seita.3G035000/Seita.3G088400/Seita.4G032400/Seita.4G080900/Seita.5G038000/Seita.5G314900/Seita.5G398100/Seita.5G420100/Seita.6G115500/Seita.7G040600/Seita.9G011900/Seita.9G097400/Seita.9G119500/Seita.9G119900/Seita.9G165300/Seita.9G470100	20
cyan	BP	GO:0046907	intracellular transport	37/181	488/9983	5.76319e-14	2.61265e-11	2.09092e-11	Seita.1G101800/Seita.1G300400/Seita.1G352400/Seita.1G366200/Seita.2G393200/Seita.2G399300/Seita.3G212600/Seita.4G032400/Seita.4G080900/Seita.4G195400/Seita.5G038000/Seita.5G061500/Seita.5G135400/Seita.5G168100/Seita.5G208400/Seita.5G226600/Seita.5G261100/Seita.5G398100/Seita.5G420100/Seita.5G469900/Seita.6G043600/Seita.6G115500/Seita.7G040600/Seita.7G051600/Seita.7G105700/Seita.7G201900/Seita.7G2…	37
cyan	BP	GO:0034613	cellular protein localization	32/181	440/9983	1.14203e-11	3.73067e-09	2.98569e-09	Seita.1G138800/Seita.1G161000/Seita.1G300400/Seita.1G352400/Seita.1G366200/Seita.2G048300/Seita.2G310300/Seita.2G393200/Seita.3G212600/Seita.4G032400/Seita.4G195400/Seita.5G135400/Seita.5G168100/Seita.5G208400/Seita.5G469900/Seita.6G115500/Seita.7G051600/Seita.7G105700/Seita.7G268000/Seita.7G335200/Seita.9G051300/Seita.9G093700/Seita.9G117600/Seita.9G119500/Seita.9G165300/Seita.9G198000/Seita.9G2…	32
cyan	BP	GO:0006891	intra-Golgi vesicle-mediated transport	9/181	19/9983	1.37157e-11	3.73067e-09	2.98569e-09	Seita.1G151300/Seita.3G035000/Seita.4G032400/Seita.4G080900/Seita.5G038000/Seita.5G314900/Seita.5G398100/Seita.9G011900/Seita.9G119500	9
cyan	BP	GO:0070727	cellular macromolecule localization	32/181	483/9983	1.30688e-10	2.96226e-08	2.37073e-08	Seita.1G138800/Seita.1G161000/Seita.1G300400/Seita.1G352400/Seita.1G366200/Seita.2G048300/Seita.2G310300/Seita.2G393200/Seita.3G212600/Seita.4G032400/Seita.4G195400/Seita.5G135400/Seita.5G168100/Seita.5G208400/Seita.5G469900/Seita.6G115500/Seita.7G051600/Seita.7G105700/Seita.7G268000/Seita.7G335200/Seita.9G051300/Seita.9G093700/Seita.9G117600/Seita.9G119500/Seita.9G165300/Seita.9G198000/Seita.9G2…	32
cyan	BP	GO:0015031	protein transport	27/181	417/9983	7.17925e-09	1.39483e-06	1.11629e-06	Seita.1G300400/Seita.1G352400/Seita.1G366200/Seita.2G393200/Seita.3G212600/Seita.4G032400/Seita.4G195400/Seita.5G135400/Seita.5G168100/Seita.5G208400/Seita.5G383000/Seita.5G469900/Seita.6G115500/Seita.7G051600/Seita.7G105700/Seita.7G268000/Seita.7G335200/Seita.9G011900/Seita.9G051300/Seita.9G117600/Seita.9G119500/Seita.9G198000/Seita.9G222800/Seita.9G310300/Seita.9G470100/Seita.9G523200/Seita.9G5…	27
cyan	BP	GO:0045184	establishment of protein localization	27/181	428/9983	1.2511e-08	1.87837e-06	1.50328e-06	Seita.1G300400/Seita.1G352400/Seita.1G366200/Seita.2G393200/Seita.3G212600/Seita.4G032400/Seita.4G195400/Seita.5G135400/Seita.5G168100/Seita.5G208400/Seita.5G383000/Seita.5G469900/Seita.6G115500/Seita.7G051600/Seita.7G105700/Seita.7G268000/Seita.7G335200/Seita.9G011900/Seita.9G051300/Seita.9G117600/Seita.9G119500/Seita.9G198000/Seita.9G222800/Seita.9G310300/Seita.9G470100/Seita.9G523200/Seita.9G5…	27
cyan	BP	GO:0010256	endomembrane system organization	12/181	78/9983	1.34263e-08	1.87837e-06	1.50328e-06	Seita.1G151300/Seita.2G354300/Seita.2G399300/Seita.3G035000/Seita.5G314900/Seita.5G420100/Seita.6G043600/Seita.7G016400/Seita.7G105700/Seita.9G011900/Seita.9G310300/Seita.9G470100	12
cyan	BP	GO:0015833	peptide transport	27/181	430/9983	1.38116e-08	1.87837e-06	1.50328e-06	Seita.1G300400/Seita.1G352400/Seita.1G366200/Seita.2G393200/Seita.3G212600/Seita.4G032400/Seita.4G195400/Seita.5G135400/Seita.5G168100/Seita.5G208400/Seita.5G383000/Seita.5G469900/Seita.6G115500/Seita.7G051600/Seita.7G105700/Seita.7G268000/Seita.7G335200/Seita.9G011900/Seita.9G051300/Seita.9G117600/Seita.9G119500/Seita.9G198000/Seita.9G222800/Seita.9G310300/Seita.9G470100/Seita.9G523200/Seita.9G5…	27
cyan	BP	GO:0006886	intracellular protein transport	24/181	362/9983	3.42203e-08	3.88544e-06	3.10955e-06	Seita.1G300400/Seita.1G352400/Seita.1G366200/Seita.2G393200/Seita.3G212600/Seita.4G032400/Seita.4G195400/Seita.5G135400/Seita.5G168100/Seita.5G208400/Seita.5G469900/Seita.6G115500/Seita.7G051600/Seita.7G105700/Seita.7G268000/Seita.7G335200/Seita.9G051300/Seita.9G117600/Seita.9G119500/Seita.9G198000/Seita.9G222800/Seita.9G310300/Seita.9G523200/Seita.9G553600	24
cyan	BP	GO:0042886	amide transport	27/181	449/9983	3.42833e-08	3.88544e-06	3.10955e-06	Seita.1G300400/Seita.1G352400/Seita.1G366200/Seita.2G393200/Seita.3G212600/Seita.4G032400/Seita.4G195400/Seita.5G135400/Seita.5G168100/Seita.5G208400/Seita.5G383000/Seita.5G469900/Seita.6G115500/Seita.7G051600/Seita.7G105700/Seita.7G268000/Seita.7G335200/Seita.9G011900/Seita.9G051300/Seita.9G117600/Seita.9G119500/Seita.9G198000/Seita.9G222800/Seita.9G310300/Seita.9G470100/Seita.9G523200/Seita.9G5…	27
cyan	BP	GO:0007010	cytoskeleton organization	18/181	237/9983	2.73743e-07	2.86377e-05	2.2919e-05	Seita.1G001600/Seita.1G142900/Seita.1G161000/Seita.2G223600/Seita.2G354300/Seita.2G376700/Seita.3G048100/Seita.5G247900/Seita.5G359000/Seita.5G383000/Seita.5G454400/Seita.7G040600/Seita.7G201900/Seita.9G197000/Seita.9G201000/Seita.9G213200/Seita.9G434900/Seita.9G553600	18
cyan	BP	GO:0051128	regulation of cellular component organization	25/181	438/9983	3.15975e-07	3.06948e-05	2.45653e-05	Seita.1G161000/Seita.1G192400/Seita.1G366200/Seita.2G048300/Seita.2G223600/Seita.2G354300/Seita.2G376700/Seita.2G399300/Seita.2G442000/Seita.3G212600/Seita.5G006000/Seita.5G208400/Seita.5G226600/Seita.5G247900/Seita.5G248300/Seita.6G025300/Seita.6G043600/Seita.7G201900/Seita.7G328200/Seita.8G140600/Seita.9G093700/Seita.9G213200/Seita.9G313300/Seita.9G355900/Seita.9G434900	25
cyan	BP	GO:0022402	cell cycle process	24/181	436/9983	1.06969e-06	9.10608e-05	7.28769e-05	Seita.1G001600/Seita.1G161000/Seita.1G165000/Seita.2G048300/Seita.2G163500/Seita.2G223600/Seita.2G297900/Seita.2G311400/Seita.3G048100/Seita.4G080900/Seita.5G102700/Seita.5G208400/Seita.5G359000/Seita.6G218300/Seita.7G016400/Seita.7G157000/Seita.7G201900/Seita.7G268800/Seita.8G140600/Seita.9G093700/Seita.9G213200/Seita.9G355900/Seita.9G434900/Seita.9G560600	24
cyan	BP	GO:0033043	regulation of organelle organization	18/181	260/9983	1.0713e-06	9.10608e-05	7.28769e-05	Seita.1G161000/Seita.1G192400/Seita.1G366200/Seita.2G048300/Seita.2G223600/Seita.2G354300/Seita.2G376700/Seita.2G399300/Seita.3G212600/Seita.5G208400/Seita.5G247900/Seita.5G248300/Seita.6G025300/Seita.6G043600/Seita.8G140600/Seita.9G093700/Seita.9G213200/Seita.9G355900	18
cyan	BP	GO:0006887	exocytosis	10/181	77/9983	1.1482e-06	9.18561e-05	7.35133e-05	Seita.2G354300/Seita.2G399300/Seita.3G007900/Seita.3G088400/Seita.6G043600/Seita.6G115500/Seita.9G165300/Seita.9G190500/Seita.9G310300/Seita.9G470100	10
cyan	BP	GO:0046903	secretion	12/181	126/9983	2.82596e-06	0.000213517	0.00017088	Seita.1G060200/Seita.2G354300/Seita.2G399300/Seita.3G007900/Seita.3G088400/Seita.5G383000/Seita.6G043600/Seita.6G115500/Seita.9G165300/Seita.9G190500/Seita.9G310300/Seita.9G470100	12
cyan	BP	GO:0016482	cytosolic transport	7/181	38/9983	4.50157e-06	0.000322218	0.000257874	Seita.2G393200/Seita.2G399300/Seita.4G080900/Seita.5G420100/Seita.7G040600/Seita.9G051300/Seita.9G310300	7
cyan	BP	GO:0006892	post-Golgi vesicle-mediated transport	6/181	26/9983	5.5677e-06	0.000378604	0.000303	Seita.2G393200/Seita.3G088400/Seita.6G115500/Seita.7G040600/Seita.9G165300/Seita.9G470100	6
cyan	BP	GO:0032940	secretion by cell	11/181	119/9983	9.90243e-06	0.0006413	0.000513239	Seita.2G354300/Seita.2G399300/Seita.3G007900/Seita.3G088400/Seita.5G383000/Seita.6G043600/Seita.6G115500/Seita.9G165300/Seita.9G190500/Seita.9G310300/Seita.9G470100	11
cyan	BP	GO:0032879	regulation of localization	16/181	248/9983	1.07503e-05	0.000645976	0.000516981	Seita.1G101800/Seita.1G300400/Seita.1G352400/Seita.1G366200/Seita.2G048300/Seita.2G399300/Seita.3G048100/Seita.3G212600/Seita.5G208400/Seita.5G226600/Seita.5G383000/Seita.6G043600/Seita.9G093700/Seita.9G310300/Seita.9G313300/Seita.9G434900	16
cyan	BP	GO:0033365	protein localization to organelle	17/181	277/9983	1.09246e-05	0.000645976	0.000516981	Seita.1G138800/Seita.1G161000/Seita.2G048300/Seita.2G310300/Seita.2G393200/Seita.5G135400/Seita.5G168100/Seita.5G208400/Seita.7G051600/Seita.7G105700/Seita.7G268000/Seita.7G335200/Seita.9G093700/Seita.9G117600/Seita.9G222800/Seita.9G310300/Seita.9G523200	17
cyan	BP	GO:0006890	retrograde vesicle-mediated transport, Golgi to ER	6/181	30/9983	1.35194e-05	0.000739531	0.000591854	Seita.1G151300/Seita.4G032400/Seita.5G038000/Seita.5G398100/Seita.5G420100/Seita.9G119500	6
cyan	BP	GO:0097435	supramolecular fiber organization	11/181	123/9983	1.35943e-05	0.000739531	0.000591854	Seita.2G223600/Seita.2G354300/Seita.2G376700/Seita.5G247900/Seita.5G359000/Seita.5G383000/Seita.5G454400/Seita.7G201900/Seita.9G201000/Seita.9G213200/Seita.9G434900	11
cyan	BP	GO:0051049	regulation of transport	14/181	200/9983	1.56719e-05	0.000819761	0.000656063	Seita.1G101800/Seita.1G300400/Seita.1G352400/Seita.1G366200/Seita.2G399300/Seita.3G048100/Seita.3G212600/Seita.5G208400/Seita.5G226600/Seita.5G383000/Seita.6G043600/Seita.9G310300/Seita.9G313300/Seita.9G434900	14
cyan	BP	GO:0016050	vesicle organization	9/181	83/9983	1.79936e-05	0.000873973	0.000699449	Seita.1G101800/Seita.1G366200/Seita.2G399300/Seita.3G212600/Seita.6G043600/Seita.9G097400/Seita.9G213200/Seita.9G310300/Seita.9G470100	9
cyan	BP	GO:0060341	regulation of cellular localization	9/181	83/9983	1.79936e-05	0.000873973	0.000699449	Seita.1G101800/Seita.1G300400/Seita.1G352400/Seita.2G048300/Seita.2G399300/Seita.5G208400/Seita.9G093700/Seita.9G310300/Seita.9G434900	9
cyan	BP	GO:0006893	Golgi to plasma membrane transport	4/181	10/9983	2.0159e-05	0.000945387	0.000756602	Seita.3G088400/Seita.6G115500/Seita.9G165300/Seita.9G470100	4
cyan	BP	GO:0007030	Golgi organization	6/181	33/9983	2.4104e-05	0.00109272	0.000874512	Seita.1G151300/Seita.2G354300/Seita.3G035000/Seita.5G314900/Seita.7G016400/Seita.9G011900	6
cyan	BP	GO:0034504	protein localization to nucleus	8/181	67/9983	2.61877e-05	0.00114888	0.000919461	Seita.1G138800/Seita.7G051600/Seita.7G105700/Seita.7G268000/Seita.7G335200/Seita.9G117600/Seita.9G222800/Seita.9G523200	8
cyan	BP	GO:0007041	lysosomal transport	5/181	21/9983	2.98018e-05	0.00126658	0.00101365	Seita.2G393200/Seita.2G399300/Seita.5G226600/Seita.6G043600/Seita.7G040600	5
cyan	BP	GO:0032535	regulation of cellular component size	9/181	90/9983	3.46778e-05	0.00142914	0.00114376	Seita.1G292700/Seita.2G084500/Seita.2G354300/Seita.2G376700/Seita.5G247900/Seita.7G016400/Seita.7G328200/Seita.9G213200/Seita.9G560600	9
cyan	BP	GO:0032875	regulation of DNA endoreduplication	5/181	22/9983	3.80034e-05	0.00145558	0.00116492	Seita.5G208400/Seita.7G016400/Seita.8G140600/Seita.9G434900/Seita.9G560600	5
cyan	BP	GO:0006606	protein import into nucleus	7/181	52/9983	3.85301e-05	0.00145558	0.00116492	Seita.7G051600/Seita.7G105700/Seita.7G268000/Seita.7G335200/Seita.9G117600/Seita.9G222800/Seita.9G523200	7
cyan	BP	GO:0051170	import into nucleus	7/181	52/9983	3.85301e-05	0.00145558	0.00116492	Seita.7G051600/Seita.7G105700/Seita.7G268000/Seita.7G335200/Seita.9G117600/Seita.9G222800/Seita.9G523200	7
cyan	BP	GO:0051568	histone H3-K4 methylation	6/181	37/9983	4.764e-05	0.00175109	0.00140141	Seita.1G192400/Seita.1G325300/Seita.3G394700/Seita.5G248300/Seita.6G025300/Seita.6G042300	6
cyan	BP	GO:0060627	regulation of vesicle-mediated transport	8/181	73/9983	4.92026e-05	0.00176093	0.00140929	Seita.1G101800/Seita.1G366200/Seita.2G399300/Seita.3G212600/Seita.5G226600/Seita.6G043600/Seita.9G310300/Seita.9G313300	8
cyan	BP	GO:0030036	actin cytoskeleton organization	9/181	95/9983	5.33837e-05	0.00181505	0.0014526	Seita.2G354300/Seita.2G376700/Seita.5G247900/Seita.5G383000/Seita.5G454400/Seita.9G201000/Seita.9G213200/Seita.9G434900/Seita.9G553600	9
cyan	BP	GO:0090066	regulation of anatomical structure size	9/181	95/9983	5.33837e-05	0.00181505	0.0014526	Seita.1G292700/Seita.2G084500/Seita.2G354300/Seita.2G376700/Seita.5G247900/Seita.7G016400/Seita.7G328200/Seita.9G213200/Seita.9G560600	9
cyan	BP	GO:0007051	spindle organization	6/181	40/9983	7.51894e-05	0.00249409	0.00199604	Seita.1G001600/Seita.1G161000/Seita.2G223600/Seita.3G048100/Seita.5G359000/Seita.7G201900	6
cyan	BP	GO:0051050	positive regulation of transport	7/181	60/9983	9.84557e-05	0.00318809	0.00255146	Seita.1G300400/Seita.1G352400/Seita.2G399300/Seita.5G208400/Seita.5G226600/Seita.5G383000/Seita.9G434900	7
cyan	BP	GO:0034968	histone lysine methylation	8/181	81/9983	0.000104084	0.00329197	0.00263459	Seita.1G192400/Seita.1G325300/Seita.2G320900/Seita.3G394700/Seita.5G248300/Seita.6G025300/Seita.6G042300/Seita.9G089900	8
cyan	BP	GO:0007034	vacuolar transport	8/181	82/9983	0.000113575	0.00337669	0.0027024	Seita.2G393200/Seita.2G399300/Seita.5G168100/Seita.5G226600/Seita.5G469900/Seita.6G043600/Seita.7G040600/Seita.9G310300	8
cyan	BP	GO:0000122	negative regulation of transcription by RNA polymerase II	6/181	43/9983	0.000114162	0.00337669	0.0027024	Seita.2G048300/Seita.3G048100/Seita.3G147400/Seita.4G001200/Seita.9G093700/Seita.9G313300	6
cyan	BP	GO:0010564	regulation of cell cycle process	10/181	129/9983	0.000114212	0.00337669	0.0027024	Seita.1G161000/Seita.2G048300/Seita.5G208400/Seita.6G218300/Seita.7G016400/Seita.8G140600/Seita.9G093700/Seita.9G355900/Seita.9G434900/Seita.9G560600	10
cyan	BP	GO:0016571	histone methylation	9/181	106/9983	0.000125791	0.00356408	0.00285236	Seita.1G192400/Seita.1G325300/Seita.2G084500/Seita.2G320900/Seita.3G394700/Seita.5G248300/Seita.6G025300/Seita.6G042300/Seita.9G089900	9
cyan	BP	GO:0030029	actin filament-based process	9/181	106/9983	0.000125791	0.00356408	0.00285236	Seita.2G354300/Seita.2G376700/Seita.5G247900/Seita.5G383000/Seita.5G454400/Seita.9G201000/Seita.9G213200/Seita.9G434900/Seita.9G553600	9
cyan	BP	GO:0018022	peptidyl-lysine methylation	8/181	85/9983	0.000146436	0.0038236	0.00306006	Seita.1G192400/Seita.1G325300/Seita.2G320900/Seita.3G394700/Seita.5G248300/Seita.6G025300/Seita.6G042300/Seita.9G089900	8
cyan	BP	GO:0043254	regulation of protein complex assembly	8/181	85/9983	0.000146436	0.0038236	0.00306006	Seita.2G223600/Seita.2G354300/Seita.2G376700/Seita.2G399300/Seita.2G442000/Seita.5G247900/Seita.6G043600/Seita.9G213200	8
cyan	BP	GO:0006888	ER to Golgi vesicle-mediated transport	6/181	45/9983	0.000148015	0.0038236	0.00306006	Seita.1G101800/Seita.4G032400/Seita.5G038000/Seita.5G398100/Seita.9G097400/Seita.9G119500	6
cyan	BP	GO:0042023	DNA endoreduplication	6/181	45/9983	0.000148015	0.0038236	0.00306006	Seita.2G163500/Seita.5G208400/Seita.7G016400/Seita.8G140600/Seita.9G434900/Seita.9G560600	6
cyan	BP	GO:0051258	protein polymerization	7/181	64/9983	0.000149008	0.0038236	0.00306006	Seita.2G223600/Seita.2G354300/Seita.2G376700/Seita.5G247900/Seita.5G359000/Seita.7G201900/Seita.9G213200	7
cyan	BP	GO:0007032	endosome organization	4/181	16/9983	0.000160416	0.00396665	0.00317455	Seita.2G399300/Seita.6G043600/Seita.9G310300/Seita.9G470100	4
cyan	BP	GO:0098876	vesicle-mediated transport to the plasma membrane	4/181	16/9983	0.000160416	0.00396665	0.00317455	Seita.3G088400/Seita.6G115500/Seita.9G165300/Seita.9G470100	4
cyan	BP	GO:0044786	cell cycle DNA replication	7/181	67/9983	0.000199289	0.00483987	0.0038734	Seita.2G163500/Seita.2G297900/Seita.5G208400/Seita.7G016400/Seita.8G140600/Seita.9G434900/Seita.9G560600	7
cyan	BP	GO:0043414	macromolecule methylation	12/181	198/9983	0.000252493	0.00602439	0.00482138	Seita.1G192400/Seita.1G325300/Seita.2G084500/Seita.2G297900/Seita.2G320900/Seita.3G080000/Seita.3G394700/Seita.4G150300/Seita.5G248300/Seita.6G025300/Seita.6G042300/Seita.9G089900	12
cyan	BP	GO:0006479	protein methylation	9/181	117/9983	0.000266792	0.00614978	0.00492173	Seita.1G192400/Seita.1G325300/Seita.2G084500/Seita.2G320900/Seita.3G394700/Seita.5G248300/Seita.6G025300/Seita.6G042300/Seita.9G089900	9
cyan	BP	GO:0008213	protein alkylation	9/181	117/9983	0.000266792	0.00614978	0.00492173	Seita.1G192400/Seita.1G325300/Seita.2G084500/Seita.2G320900/Seita.3G394700/Seita.5G248300/Seita.6G025300/Seita.6G042300/Seita.9G089900	9
cyan	BP	GO:0007015	actin filament organization	7/181	71/9983	0.000286774	0.00650021	0.00520218	Seita.2G354300/Seita.2G376700/Seita.5G247900/Seita.5G383000/Seita.5G454400/Seita.9G201000/Seita.9G213200	7
cyan	BP	GO:0006913	nucleocytoplasmic transport	9/181	120/9983	0.000322458	0.00707327	0.0056608	Seita.4G195400/Seita.5G261100/Seita.7G051600/Seita.7G105700/Seita.7G268000/Seita.7G335200/Seita.9G117600/Seita.9G222800/Seita.9G523200	9
cyan	BP	GO:0051169	nuclear transport	9/181	120/9983	0.000322458	0.00707327	0.0056608	Seita.4G195400/Seita.5G261100/Seita.7G051600/Seita.7G105700/Seita.7G268000/Seita.7G335200/Seita.9G117600/Seita.9G222800/Seita.9G523200	9
cyan	BP	GO:1903047	mitotic cell cycle process	13/181	235/9983	0.000342038	0.00738368	0.00590923	Seita.1G001600/Seita.1G161000/Seita.2G223600/Seita.2G297900/Seita.4G080900/Seita.5G208400/Seita.6G218300/Seita.7G157000/Seita.7G201900/Seita.7G268800/Seita.8G140600/Seita.9G213200/Seita.9G355900	13
cyan	BP	GO:0032989	cellular component morphogenesis	19/181	440/9983	0.00038748	0.00823395	0.00658971	Seita.1G059800/Seita.1G060200/Seita.1G112000/Seita.2G163500/Seita.5G006000/Seita.5G247900/Seita.5G383000/Seita.5G424000/Seita.7G201900/Seita.7G268800/Seita.8G100700/Seita.8G140600/Seita.9G129800/Seita.9G190500/Seita.9G213200/Seita.9G313300/Seita.9G429800/Seita.9G434900/Seita.9G560600	19
cyan	BP	GO:0031338	regulation of vesicle fusion	4/181	21/9983	0.000491405	0.0102817	0.00822854	Seita.1G366200/Seita.2G399300/Seita.3G212600/Seita.6G043600	4
cyan	BP	GO:0006260	DNA replication	10/181	158/9983	0.000590725	0.01202	0.0096197	Seita.2G163500/Seita.2G297900/Seita.5G208400/Seita.5G306500/Seita.7G016400/Seita.7G335200/Seita.8G140600/Seita.9G434900/Seita.9G523200/Seita.9G560600	10
cyan	BP	GO:0051225	spindle assembly	4/181	22/9983	0.000592161	0.01202	0.0096197	Seita.1G001600/Seita.2G223600/Seita.3G048100/Seita.7G201900	4
cyan	BP	GO:0010948	negative regulation of cell cycle process	6/181	58/9983	0.000605426	0.0121085	0.00969057	Seita.2G048300/Seita.5G208400/Seita.6G218300/Seita.7G016400/Seita.9G093700/Seita.9G355900	6
cyan	BP	GO:0051130	positive regulation of cellular component organization	9/181	131/9983	0.000614983	0.0121214	0.00970087	Seita.1G192400/Seita.2G223600/Seita.2G376700/Seita.2G442000/Seita.5G208400/Seita.5G226600/Seita.5G247900/Seita.5G248300/Seita.6G025300	9
cyan	BP	GO:0042147	retrograde transport, endosome to Golgi	4/181	23/9983	0.000706752	0.0137312	0.0109892	Seita.4G080900/Seita.5G420100/Seita.7G040600/Seita.9G051300	4
cyan	BP	GO:0072594	establishment of protein localization to organelle	12/181	225/9983	0.00079913	0.0153073	0.0122506	Seita.2G393200/Seita.5G135400/Seita.5G168100/Seita.5G208400/Seita.7G051600/Seita.7G105700/Seita.7G268000/Seita.7G335200/Seita.9G117600/Seita.9G222800/Seita.9G310300/Seita.9G523200	12
cyan	BP	GO:0090329	regulation of DNA-dependent DNA replication	5/181	41/9983	0.000818426	0.0154592	0.0123721	Seita.5G208400/Seita.7G016400/Seita.8G140600/Seita.9G434900/Seita.9G560600	5
cyan	BP	GO:0048768	root hair cell tip growth	3/181	11/9983	0.000868926	0.0161882	0.0129556	Seita.7G268800/Seita.8G100700/Seita.9G190500	3
cyan	BP	GO:0009894	regulation of catabolic process	10/181	167/9983	0.000908181	0.0166909	0.0133579	Seita.2G297900/Seita.2G310300/Seita.2G399300/Seita.2G442000/Seita.3G007900/Seita.3G048100/Seita.5G102700/Seita.5G208400/Seita.7G158600/Seita.7G328200	10
cyan	BP	GO:0048513	animal organ development	7/181	88/9983	0.00105772	0.01918	0.01535	Seita.2G320900/Seita.5G208400/Seita.5G383000/Seita.6G043600/Seita.6G218300/Seita.9G097400/Seita.9G313300	7
cyan	BP	GO:0008333	endosome to lysosome transport	3/181	12/9983	0.00114317	0.0194424	0.0155599	Seita.2G399300/Seita.5G226600/Seita.6G043600	3
cyan	BP	GO:0030866	cortical actin cytoskeleton organization	3/181	12/9983	0.00114317	0.0194424	0.0155599	Seita.5G247900/Seita.9G213200/Seita.9G553600	3
cyan	BP	GO:0007052	mitotic spindle organization	4/181	26/9983	0.00114367	0.0194424	0.0155599	Seita.1G001600/Seita.1G161000/Seita.2G223600/Seita.7G201900	4
cyan	BP	GO:0007283	spermatogenesis	4/181	26/9983	0.00114367	0.0194424	0.0155599	Seita.2G048300/Seita.2G320900/Seita.5G102700/Seita.9G093700	4
cyan	BP	GO:1902850	microtubule cytoskeleton organization involved in mitosis	4/181	26/9983	0.00114367	0.0194424	0.0155599	Seita.1G001600/Seita.1G161000/Seita.2G223600/Seita.7G201900	4
cyan	BP	GO:0000226	microtubule cytoskeleton organization	8/181	116/9983	0.00120143	0.0201722	0.016144	Seita.1G001600/Seita.1G142900/Seita.1G161000/Seita.2G223600/Seita.3G048100/Seita.5G359000/Seita.7G201900/Seita.9G197000	8
cyan	BP	GO:0006275	regulation of DNA replication	5/181	45/9983	0.00125859	0.0208133	0.0166571	Seita.5G208400/Seita.7G016400/Seita.8G140600/Seita.9G434900/Seita.9G560600	5
cyan	BP	GO:0044087	regulation of cellular component biogenesis	9/181	145/9983	0.00127023	0.0208133	0.0166571	Seita.2G223600/Seita.2G354300/Seita.2G376700/Seita.2G399300/Seita.2G442000/Seita.5G006000/Seita.5G247900/Seita.6G043600/Seita.9G213200	9
cyan	BP	GO:0010638	positive regulation of organelle organization	7/181	91/9983	0.0012887	0.0208647	0.0166982	Seita.1G192400/Seita.2G223600/Seita.2G376700/Seita.5G208400/Seita.5G247900/Seita.5G248300/Seita.6G025300	7
cyan	BP	GO:0032386	regulation of intracellular transport	5/181	46/9983	0.00139163	0.0222661	0.0178198	Seita.1G300400/Seita.1G352400/Seita.2G399300/Seita.5G208400/Seita.9G310300	5
cyan	BP	GO:0000972	transcription-dependent tethering of RNA polymerase II gene DNA at nuclear periphery	3/181	13/9983	0.0014664	0.022923	0.0183455	Seita.7G105700/Seita.7G335200/Seita.9G523200	3
cyan	BP	GO:0090307	mitotic spindle assembly	3/181	13/9983	0.0014664	0.022923	0.0183455	Seita.1G001600/Seita.2G223600/Seita.7G201900	3
cyan	BP	GO:0034622	cellular protein-containing complex assembly	17/181	417/9983	0.00148482	0.0229473	0.0183649	Seita.1G151300/Seita.2G223600/Seita.2G354300/Seita.2G376700/Seita.2G399300/Seita.2G442000/Seita.5G247900/Seita.5G359000/Seita.5G383000/Seita.6G043600/Seita.7G051600/Seita.7G201900/Seita.7G335200/Seita.9G097400/Seita.9G197000/Seita.9G213200/Seita.9G523200	17
cyan	BP	GO:0032271	regulation of protein polymerization	5/181	47/9983	0.00153476	0.0234525	0.0187693	Seita.2G223600/Seita.2G354300/Seita.2G376700/Seita.5G247900/Seita.9G213200	5
cyan	BP	GO:0031329	regulation of cellular catabolic process	9/181	151/9983	0.00168517	0.0252337	0.0201948	Seita.2G297900/Seita.2G310300/Seita.2G399300/Seita.2G442000/Seita.3G007900/Seita.3G048100/Seita.5G208400/Seita.7G158600/Seita.7G328200	9
cyan	BP	GO:1903827	regulation of cellular protein localization	5/181	48/9983	0.00168843	0.0252337	0.0201948	Seita.1G300400/Seita.1G352400/Seita.2G048300/Seita.5G208400/Seita.9G093700	5
cyan	BP	GO:0032388	positive regulation of intracellular transport	4/181	29/9983	0.00174162	0.0257458	0.0206046	Seita.1G300400/Seita.1G352400/Seita.2G399300/Seita.5G208400	4
cyan	BP	GO:0006906	vesicle fusion	5/181	49/9983	0.0018531	0.0268108	0.021457	Seita.1G101800/Seita.1G366200/Seita.2G399300/Seita.3G212600/Seita.6G043600	5
cyan	BP	GO:0043087	regulation of GTPase activity	5/181	49/9983	0.0018531	0.0268108	0.021457	Seita.1G002600/Seita.1G366200/Seita.2G354300/Seita.3G212600/Seita.9G197000	5
cyan	BP	GO:0000902	cell morphogenesis	16/181	391/9983	0.00196637	0.0281501	0.0225288	Seita.1G059800/Seita.1G112000/Seita.2G163500/Seita.5G006000/Seita.5G247900/Seita.5G424000/Seita.7G201900/Seita.7G268800/Seita.8G100700/Seita.8G140600/Seita.9G129800/Seita.9G190500/Seita.9G213200/Seita.9G313300/Seita.9G429800/Seita.9G560600	16
cyan	BP	GO:0018193	peptidyl-amino acid modification	16/181	392/9983	0.00201794	0.0284511	0.0227697	Seita.1G112000/Seita.1G192400/Seita.1G325300/Seita.2G320900/Seita.2G331100/Seita.3G394700/Seita.4G002500/Seita.5G208400/Seita.5G248300/Seita.5G383000/Seita.6G025300/Seita.6G042300/Seita.7G226200/Seita.9G089900/Seita.9G185900/Seita.9G434900	16
cyan	BP	GO:0090174	organelle membrane fusion	5/181	50/9983	0.00202923	0.0284511	0.0227697	Seita.1G101800/Seita.1G366200/Seita.2G399300/Seita.3G212600/Seita.6G043600	5
cyan	BP	GO:0051493	regulation of cytoskeleton organization	6/181	75/9983	0.00233764	0.0324407	0.0259626	Seita.1G161000/Seita.2G223600/Seita.2G354300/Seita.2G376700/Seita.5G247900/Seita.9G213200	6
cyan	BP	GO:0006261	DNA-dependent DNA replication	8/181	130/9983	0.00247994	0.0340373	0.0272403	Seita.2G163500/Seita.2G297900/Seita.5G208400/Seita.5G306500/Seita.7G016400/Seita.8G140600/Seita.9G434900/Seita.9G560600	8
cyan	BP	GO:0051222	positive regulation of protein transport	4/181	32/9983	0.00252777	0.0340373	0.0272403	Seita.1G300400/Seita.1G352400/Seita.5G208400/Seita.5G383000	4
cyan	BP	GO:1904951	positive regulation of establishment of protein localization	4/181	32/9983	0.00252777	0.0340373	0.0272403	Seita.1G300400/Seita.1G352400/Seita.5G208400/Seita.5G383000	4
cyan	BP	GO:0000919	cell plate assembly	3/181	16/9983	0.00275861	0.036008	0.0288175	Seita.1G161000/Seita.4G080900/Seita.7G157000	3
cyan	BP	GO:0010048	vernalization response	3/181	16/9983	0.00275861	0.036008	0.0288175	Seita.3G191800/Seita.6G025300/Seita.9G089900	3
cyan	BP	GO:0046785	microtubule polymerization	3/181	16/9983	0.00275861	0.036008	0.0288175	Seita.2G223600/Seita.5G359000/Seita.7G201900	3
cyan	BP	GO:0016570	histone modification	10/181	194/9983	0.00278003	0.036008	0.0288175	Seita.1G192400/Seita.1G325300/Seita.2G084500/Seita.2G320900/Seita.3G394700/Seita.5G102700/Seita.5G248300/Seita.6G025300/Seita.6G042300/Seita.9G089900	10
cyan	BP	GO:0016569	covalent chromatin modification	10/181	198/9983	0.00322029	0.041317	0.0330664	Seita.1G192400/Seita.1G325300/Seita.2G084500/Seita.2G320900/Seita.3G394700/Seita.5G102700/Seita.5G248300/Seita.6G025300/Seita.6G042300/Seita.9G089900	10
cyan	BP	GO:0051017	actin filament bundle assembly	3/181	17/9983	0.00330542	0.0416239	0.033312	Seita.5G454400/Seita.9G201000/Seita.9G213200	3
cyan	BP	GO:0061572	actin filament bundle organization	3/181	17/9983	0.00330542	0.0416239	0.033312	Seita.5G454400/Seita.9G201000/Seita.9G213200	3
cyan	BP	GO:0010506	regulation of autophagy	4/181	35/9983	0.00352853	0.0440257	0.0352342	Seita.2G310300/Seita.3G007900/Seita.5G208400/Seita.7G328200	4
cyan	BP	GO:1902903	regulation of supramolecular fiber organization	5/181	57/9983	0.00362214	0.0447828	0.0358401	Seita.2G223600/Seita.2G354300/Seita.2G376700/Seita.5G247900/Seita.9G213200	5
cyan	CC	GO:0044431	Golgi apparatus part	33/185	331/9955	1.32068e-15	1.65476e-13	1.05408e-13	Seita.1G059800/Seita.1G101800/Seita.1G112000/Seita.1G151300/Seita.1G300400/Seita.1G352400/Seita.1G356700/Seita.2G311400/Seita.2G354300/Seita.2G393200/Seita.3G035000/Seita.3G259700/Seita.3G275800/Seita.4G032400/Seita.4G059700/Seita.4G080900/Seita.4G255000/Seita.5G006000/Seita.5G038000/Seita.5G314900/Seita.5G398100/Seita.5G420100/Seita.7G040600/Seita.7G157000/Seita.9G011900/Seita.9G106400/Seita.9G1…	33
cyan	CC	GO:0031982	vesicle	40/185	497/9955	1.42039e-15	1.65476e-13	1.05408e-13	Seita.1G059800/Seita.1G101800/Seita.1G112000/Seita.1G300400/Seita.1G352400/Seita.1G356700/Seita.2G354300/Seita.2G393200/Seita.2G399300/Seita.3G088400/Seita.3G259700/Seita.3G275800/Seita.4G032400/Seita.4G059700/Seita.4G080900/Seita.4G255000/Seita.5G006000/Seita.5G038000/Seita.5G208400/Seita.5G381400/Seita.5G398100/Seita.5G420100/Seita.5G469900/Seita.6G043600/Seita.6G115500/Seita.7G040600/Seita.7G1…	40
cyan	CC	GO:0031410	cytoplasmic vesicle	37/185	466/9955	3.04848e-14	2.36765e-12	1.50819e-12	Seita.1G059800/Seita.1G101800/Seita.1G112000/Seita.1G300400/Seita.1G352400/Seita.1G356700/Seita.2G354300/Seita.2G393200/Seita.2G399300/Seita.3G259700/Seita.3G275800/Seita.4G032400/Seita.4G059700/Seita.4G080900/Seita.4G255000/Seita.5G006000/Seita.5G038000/Seita.5G208400/Seita.5G381400/Seita.5G398100/Seita.5G420100/Seita.5G469900/Seita.6G043600/Seita.7G040600/Seita.7G157000/Seita.8G100700/Seita.9G0…	37
cyan	CC	GO:0097708	intracellular vesicle	37/185	471/9955	4.26111e-14	2.4821e-12	1.5811e-12	Seita.1G059800/Seita.1G101800/Seita.1G112000/Seita.1G300400/Seita.1G352400/Seita.1G356700/Seita.2G354300/Seita.2G393200/Seita.2G399300/Seita.3G259700/Seita.3G275800/Seita.4G032400/Seita.4G059700/Seita.4G080900/Seita.4G255000/Seita.5G006000/Seita.5G038000/Seita.5G208400/Seita.5G381400/Seita.5G398100/Seita.5G420100/Seita.5G469900/Seita.6G043600/Seita.7G040600/Seita.7G157000/Seita.8G100700/Seita.9G0…	37
cyan	CC	GO:0098791	Golgi subcompartment	26/185	303/9955	5.68396e-11	2.64872e-09	1.68724e-09	Seita.1G059800/Seita.1G101800/Seita.1G112000/Seita.1G300400/Seita.1G352400/Seita.2G311400/Seita.2G354300/Seita.2G393200/Seita.3G035000/Seita.3G259700/Seita.3G275800/Seita.4G080900/Seita.4G255000/Seita.5G006000/Seita.5G314900/Seita.5G420100/Seita.7G040600/Seita.7G157000/Seita.9G011900/Seita.9G106400/Seita.9G119900/Seita.9G129800/Seita.9G190500/Seita.9G310300/Seita.9G417100/Seita.9G470100	26
cyan	CC	GO:0030117	membrane coat	9/185	23/9955	1.42124e-10	4.73071e-09	3.01346e-09	Seita.1G356700/Seita.2G393200/Seita.4G032400/Seita.4G059700/Seita.5G038000/Seita.5G398100/Seita.5G426800/Seita.9G097400/Seita.9G119500	9
cyan	CC	GO:0048475	coated membrane	9/185	23/9955	1.42124e-10	4.73071e-09	3.01346e-09	Seita.1G356700/Seita.2G393200/Seita.4G032400/Seita.4G059700/Seita.5G038000/Seita.5G398100/Seita.5G426800/Seita.9G097400/Seita.9G119500	9
cyan	CC	GO:0005802	trans-Golgi network	22/185	230/9955	2.42405e-10	7.06004e-09	4.49725e-09	Seita.1G059800/Seita.1G101800/Seita.1G112000/Seita.1G300400/Seita.1G352400/Seita.2G311400/Seita.2G354300/Seita.2G393200/Seita.3G259700/Seita.3G275800/Seita.4G080900/Seita.4G255000/Seita.5G006000/Seita.7G040600/Seita.7G157000/Seita.9G106400/Seita.9G119900/Seita.9G129800/Seita.9G190500/Seita.9G310300/Seita.9G417100/Seita.9G470100	22
cyan	CC	GO:0005768	endosome	26/185	361/9955	2.57709e-09	6.10683e-08	3.89005e-08	Seita.1G059800/Seita.1G101800/Seita.1G112000/Seita.1G300400/Seita.1G352400/Seita.2G354300/Seita.2G393200/Seita.2G399300/Seita.3G259700/Seita.3G275800/Seita.4G080900/Seita.4G255000/Seita.5G006000/Seita.5G381400/Seita.5G469900/Seita.6G043600/Seita.7G157000/Seita.9G051300/Seita.9G106400/Seita.9G119900/Seita.9G190500/Seita.9G213200/Seita.9G310300/Seita.9G417100/Seita.9G434900/Seita.9G470100	26
cyan	CC	GO:0099023	tethering complex	10/185	41/9955	2.62096e-09	6.10683e-08	3.89005e-08	Seita.1G151300/Seita.2G399300/Seita.3G088400/Seita.4G080900/Seita.5G420100/Seita.6G043600/Seita.6G115500/Seita.7G040600/Seita.9G011900/Seita.9G165300	10
cyan	CC	GO:0044433	cytoplasmic vesicle part	17/185	167/9955	1.17352e-08	2.48574e-07	1.58341e-07	Seita.1G356700/Seita.2G393200/Seita.2G399300/Seita.4G032400/Seita.4G059700/Seita.4G080900/Seita.5G038000/Seita.5G398100/Seita.5G420100/Seita.6G043600/Seita.7G040600/Seita.8G100700/Seita.9G051300/Seita.9G097400/Seita.9G119500/Seita.9G310300/Seita.9G434900	17
cyan	CC	GO:0030120	vesicle coat	7/185	20/9955	4.31871e-08	8.3855e-07	5.34157e-07	Seita.1G356700/Seita.4G032400/Seita.4G059700/Seita.5G038000/Seita.5G398100/Seita.9G097400/Seita.9G119500	7
cyan	CC	GO:0044430	cytoskeletal part	19/185	264/9955	4.26582e-07	7.37487e-06	4.69779e-06	Seita.1G001600/Seita.1G142900/Seita.1G161000/Seita.2G223600/Seita.2G399300/Seita.3G007900/Seita.3G048100/Seita.4G001200/Seita.5G247900/Seita.5G359000/Seita.5G383000/Seita.5G454400/Seita.7G201900/Seita.7G268800/Seita.9G197000/Seita.9G213200/Seita.9G355900/Seita.9G470100/Seita.9G553600	19
cyan	CC	GO:0030662	coated vesicle membrane	7/185	27/9955	4.43125e-07	7.37487e-06	4.69779e-06	Seita.1G356700/Seita.4G032400/Seita.4G059700/Seita.5G038000/Seita.5G398100/Seita.9G097400/Seita.9G119500	7
cyan	CC	GO:0030659	cytoplasmic vesicle membrane	9/185	55/9955	6.62384e-07	1.0289e-05	6.55411e-06	Seita.1G356700/Seita.4G032400/Seita.4G059700/Seita.5G038000/Seita.5G398100/Seita.8G100700/Seita.9G097400/Seita.9G119500/Seita.9G310300	9
cyan	CC	GO:0017053	transcriptional repressor complex	7/185	29/9955	7.54714e-07	1.0344e-05	6.58914e-06	Seita.2G048300/Seita.2G320900/Seita.3G048100/Seita.4G001200/Seita.6G025300/Seita.9G089900/Seita.9G093700	7
cyan	CC	GO:0030660	Golgi-associated vesicle membrane	7/185	29/9955	7.54714e-07	1.0344e-05	6.58914e-06	Seita.1G356700/Seita.4G032400/Seita.4G059700/Seita.5G038000/Seita.5G398100/Seita.9G097400/Seita.9G119500	7
cyan	CC	GO:0012506	vesicle membrane	9/185	60/9955	1.4217e-06	1.84031e-05	1.17228e-05	Seita.1G356700/Seita.4G032400/Seita.4G059700/Seita.5G038000/Seita.5G398100/Seita.8G100700/Seita.9G097400/Seita.9G119500/Seita.9G310300	9
cyan	CC	GO:0005635	nuclear envelope	12/185	116/9955	1.51644e-06	1.85964e-05	1.18459e-05	Seita.1G292700/Seita.2G223600/Seita.4G195400/Seita.5G261100/Seita.7G051600/Seita.7G105700/Seita.7G268000/Seita.7G268800/Seita.7G335200/Seita.9G117600/Seita.9G222800/Seita.9G523200	12
cyan	CC	GO:0005856	cytoskeleton	20/185	317/9955	1.67777e-06	1.9546e-05	1.24508e-05	Seita.1G001600/Seita.1G138800/Seita.1G142900/Seita.1G161000/Seita.2G223600/Seita.2G399300/Seita.3G007900/Seita.3G048100/Seita.4G001200/Seita.5G247900/Seita.5G359000/Seita.5G383000/Seita.5G454400/Seita.7G201900/Seita.7G268800/Seita.9G197000/Seita.9G213200/Seita.9G355900/Seita.9G470100/Seita.9G553600	20
cyan	CC	GO:0090568	nuclear transcriptional repressor complex	6/185	25/9955	5.01337e-06	5.56246e-05	3.54329e-05	Seita.2G048300/Seita.2G320900/Seita.4G001200/Seita.6G025300/Seita.9G089900/Seita.9G093700	6
cyan	CC	GO:0005769	early endosome	8/185	56/9955	8.10308e-06	8.5819e-05	5.46667e-05	Seita.1G300400/Seita.1G352400/Seita.2G354300/Seita.2G393200/Seita.2G399300/Seita.7G157000/Seita.9G190500/Seita.9G310300	8
cyan	CC	GO:0030135	coated vesicle	8/185	57/9955	9.27784e-06	9.11906e-05	5.80884e-05	Seita.1G356700/Seita.4G032400/Seita.4G059700/Seita.5G038000/Seita.5G208400/Seita.5G398100/Seita.9G097400/Seita.9G119500	8
cyan	CC	GO:0099081	supramolecular polymer	11/185	116/9955	9.7844e-06	9.11906e-05	5.80884e-05	Seita.1G161000/Seita.2G223600/Seita.2G399300/Seita.3G048100/Seita.5G383000/Seita.5G454400/Seita.7G268800/Seita.9G197000/Seita.9G355900/Seita.9G434900/Seita.9G470100	11
cyan	CC	GO:0099512	supramolecular fiber	11/185	116/9955	9.7844e-06	9.11906e-05	5.80884e-05	Seita.1G161000/Seita.2G223600/Seita.2G399300/Seita.3G048100/Seita.5G383000/Seita.5G454400/Seita.7G268800/Seita.9G197000/Seita.9G355900/Seita.9G434900/Seita.9G470100	11
cyan	CC	GO:0099080	supramolecular complex	11/185	120/9955	1.35461e-05	0.000118274	7.53407e-05	Seita.1G161000/Seita.2G223600/Seita.2G399300/Seita.3G048100/Seita.5G383000/Seita.5G454400/Seita.7G268800/Seita.9G197000/Seita.9G355900/Seita.9G434900/Seita.9G470100	11
cyan	CC	GO:0098796	membrane protein complex	18/185	304/9955	1.37056e-05	0.000118274	7.53407e-05	Seita.1G002600/Seita.1G101800/Seita.1G277700/Seita.1G356700/Seita.2G393200/Seita.2G399300/Seita.4G032400/Seita.4G059700/Seita.5G038000/Seita.5G135400/Seita.5G398100/Seita.5G426800/Seita.5G464400/Seita.6G043600/Seita.9G051300/Seita.9G097400/Seita.9G119500/Seita.9G185900	18
cyan	CC	GO:0005798	Golgi-associated vesicle	7/185	46/9955	1.98202e-05	0.000164932	0.000105062	Seita.1G356700/Seita.4G032400/Seita.4G059700/Seita.5G038000/Seita.5G398100/Seita.9G097400/Seita.9G119500	7
cyan	CC	GO:0000139	Golgi membrane	10/185	112/9955	4.22887e-05	0.000339768	0.000216432	Seita.1G101800/Seita.1G112000/Seita.2G354300/Seita.2G393200/Seita.3G035000/Seita.5G314900/Seita.5G420100/Seita.7G040600/Seita.9G119900/Seita.9G470100	10
cyan	CC	GO:0044450	microtubule organizing center part	4/185	12/9955	5.08607e-05	0.000395018	0.000251627	Seita.1G161000/Seita.2G223600/Seita.3G007900/Seita.7G201900	4
cyan	CC	GO:0015629	actin cytoskeleton	7/185	54/9955	5.7859e-05	0.000434876	0.000277016	Seita.1G138800/Seita.2G399300/Seita.5G247900/Seita.5G383000/Seita.5G454400/Seita.9G213200/Seita.9G553600	7
cyan	CC	GO:0005815	microtubule organizing center	6/185	40/9955	8.61956e-05	0.000627612	0.000399789	Seita.1G161000/Seita.2G223600/Seita.3G007900/Seita.4G001200/Seita.7G201900/Seita.9G470100	6
cyan	CC	GO:0044448	cell cortex part	7/185	59/9955	0.000103072	0.000715642	0.000455864	Seita.2G223600/Seita.3G088400/Seita.5G247900/Seita.6G115500/Seita.9G165300/Seita.9G213200/Seita.9G553600	7
cyan	CC	GO:0099513	polymeric cytoskeletal fiber	9/185	101/9955	0.000104428	0.000715642	0.000455864	Seita.1G161000/Seita.2G223600/Seita.2G399300/Seita.3G048100/Seita.5G454400/Seita.7G268800/Seita.9G197000/Seita.9G355900/Seita.9G470100	9
cyan	CC	GO:0099568	cytoplasmic region	10/185	131/9955	0.000158996	0.00105846	0.000674237	Seita.2G223600/Seita.3G088400/Seita.5G247900/Seita.6G115500/Seita.7G268800/Seita.9G165300/Seita.9G213200/Seita.9G313300/Seita.9G470100/Seita.9G553600	10
cyan	CC	GO:0030137	COPI-coated vesicle	4/185	16/9955	0.000176407	0.00114175	0.000727293	Seita.4G032400/Seita.5G038000/Seita.5G398100/Seita.9G119500	4
cyan	CC	GO:0015630	microtubule cytoskeleton	13/185	221/9955	0.000239374	0.00150741	0.00096022	Seita.1G001600/Seita.1G142900/Seita.1G161000/Seita.2G223600/Seita.3G007900/Seita.3G048100/Seita.4G001200/Seita.5G359000/Seita.7G201900/Seita.7G268800/Seita.9G197000/Seita.9G355900/Seita.9G470100	13
cyan	CC	GO:0005795	Golgi stack	5/185	33/9955	0.000326576	0.00200243	0.00127555	Seita.1G101800/Seita.1G112000/Seita.3G035000/Seita.5G314900/Seita.9G011900	5
cyan	CC	GO:0005938	cell cortex	9/185	122/9955	0.000436839	0.00258083	0.00164399	Seita.2G223600/Seita.3G088400/Seita.5G247900/Seita.6G115500/Seita.7G268800/Seita.9G165300/Seita.9G213200/Seita.9G313300/Seita.9G553600	9
cyan	CC	GO:0031985	Golgi cisterna	4/185	20/9955	0.000443062	0.00258083	0.00164399	Seita.1G101800/Seita.1G112000/Seita.3G035000/Seita.5G314900	4
cyan	CC	GO:0000790	nuclear chromatin	7/185	86/9955	0.00106587	0.00605726	0.00385848	Seita.1G165000/Seita.2G048300/Seita.2G297900/Seita.2G320900/Seita.3G048100/Seita.4G001200/Seita.9G093700	7
cyan	CC	GO:0005813	centrosome	4/185	26/9955	0.00125316	0.00686568	0.00437344	Seita.1G161000/Seita.3G007900/Seita.4G001200/Seita.7G201900	4
cyan	CC	GO:0005643	nuclear pore	5/185	44/9955	0.00126706	0.00686568	0.00437344	Seita.4G195400/Seita.7G105700/Seita.7G268000/Seita.7G335200/Seita.9G523200	5
cyan	CC	GO:0005874	microtubule	7/185	90/9955	0.00139283	0.00737567	0.0046983	Seita.1G161000/Seita.2G223600/Seita.3G048100/Seita.7G268800/Seita.9G197000/Seita.9G355900/Seita.9G470100	7
cyan	CC	GO:0000145	exocyst	3/185	14/9955	0.00197632	0.00959337	0.00611098	Seita.3G088400/Seita.6G115500/Seita.9G165300	3
cyan	CC	GO:0043230	extracellular organelle	3/185	14/9955	0.00197632	0.00959337	0.00611098	Seita.3G088400/Seita.6G115500/Seita.9G165300	3
cyan	CC	GO:0070062	extracellular exosome	3/185	14/9955	0.00197632	0.00959337	0.00611098	Seita.3G088400/Seita.6G115500/Seita.9G165300	3
cyan	CC	GO:1903561	extracellular vesicle	3/185	14/9955	0.00197632	0.00959337	0.00611098	Seita.3G088400/Seita.6G115500/Seita.9G165300	3
cyan	CC	GO:0005819	spindle	6/185	73/9955	0.00230483	0.0109597	0.00698134	Seita.1G142900/Seita.1G161000/Seita.2G223600/Seita.3G048100/Seita.5G359000/Seita.9G355900	6
cyan	CC	GO:0070603	SWI/SNF superfamily-type complex	4/185	31/9955	0.00245354	0.0114335	0.00728315	Seita.2G048300/Seita.2G320900/Seita.4G001200/Seita.9G093700	4
cyan	CC	GO:0044440	endosomal part	7/185	104/9955	0.00318804	0.0145649	0.00927787	Seita.2G393200/Seita.2G399300/Seita.4G080900/Seita.6G043600/Seita.9G051300/Seita.9G310300/Seita.9G434900	7
cyan	CC	GO:0032155	cell division site part	3/185	17/9955	0.00354371	0.0158785	0.0101146	Seita.2G223600/Seita.7G201900/Seita.9G213200	3
cyan	CC	GO:1904949	ATPase complex	4/185	35/9955	0.00385401	0.0169431	0.0107928	Seita.2G048300/Seita.2G320900/Seita.4G001200/Seita.9G093700	4
cyan	CC	GO:0030864	cortical actin cytoskeleton	3/185	20/9955	0.00570291	0.024607	0.0156747	Seita.5G247900/Seita.9G213200/Seita.9G553600	3
cyan	CC	GO:0044427	chromosomal part	13/185	316/9955	0.00603938	0.025585	0.0162977	Seita.1G165000/Seita.1G292700/Seita.2G048300/Seita.2G084500/Seita.2G297900/Seita.2G311400/Seita.2G320900/Seita.3G048100/Seita.4G001200/Seita.5G306500/Seita.5G359000/Seita.9G093700/Seita.9G355900	13
cyan	CC	GO:0000228	nuclear chromosome	9/185	180/9955	0.00638988	0.0265865	0.0169356	Seita.1G165000/Seita.2G048300/Seita.2G297900/Seita.2G311400/Seita.2G320900/Seita.3G048100/Seita.4G001200/Seita.5G383000/Seita.9G093700	9
cyan	CC	GO:0030658	transport vesicle membrane	3/185	21/9955	0.00656349	0.0268297	0.0170905	Seita.1G356700/Seita.4G059700/Seita.9G097400	3
cyan	CC	GO:0034399	nuclear periphery	4/185	41/9955	0.00683802	0.02747	0.0174984	Seita.1G292700/Seita.2G354300/Seita.7G335200/Seita.9G523200	4
cyan	CC	GO:0030863	cortical cytoskeleton	4/185	42/9955	0.00745017	0.0294219	0.0187417	Seita.2G223600/Seita.5G247900/Seita.9G213200/Seita.9G553600	4
cyan	CC	GO:0005694	chromosome	14/185	367/9955	0.00847787	0.0324884	0.0206951	Seita.1G165000/Seita.1G292700/Seita.2G048300/Seita.2G084500/Seita.2G297900/Seita.2G311400/Seita.2G320900/Seita.3G048100/Seita.4G001200/Seita.5G306500/Seita.5G359000/Seita.5G383000/Seita.9G093700/Seita.9G355900	14
cyan	CC	GO:0005876	spindle microtubule	3/185	23/9955	0.00850553	0.0324884	0.0206951	Seita.1G161000/Seita.3G048100/Seita.9G355900	3
cyan	CC	GO:0031965	nuclear membrane	4/185	44/9955	0.00878039	0.0329568	0.0209935	Seita.7G105700/Seita.7G335200/Seita.9G222800/Seita.9G523200	4
cyan	CC	GO:0000151	ubiquitin ligase complex	8/185	157/9955	0.00891105	0.0329568	0.0209935	Seita.2G152700/Seita.3G122300/Seita.5G102700/Seita.5G208400/Seita.6G247500/Seita.7G328200/Seita.8G132300/Seita.9G355900	8
cyan	CC	GO:0000785	chromatin	8/185	158/9955	0.00924144	0.0336446	0.0214316	Seita.1G165000/Seita.1G292700/Seita.2G048300/Seita.2G297900/Seita.2G320900/Seita.3G048100/Seita.4G001200/Seita.9G093700	8
cyan	CC	GO:0032588	trans-Golgi network membrane	3/185	25/9955	0.0107506	0.0385367	0.0245479	Seita.2G393200/Seita.7G040600/Seita.9G470100	3
cyan	CC	GO:0048471	perinuclear region of cytoplasm	4/185	47/9955	0.0110519	0.0390166	0.0248536	Seita.1G138800/Seita.2G354300/Seita.5G208400/Seita.7G040600	4
cyan	CC	GO:0044454	nuclear chromosome part	8/185	169/9955	0.0135065	0.0459869	0.0292937	Seita.1G165000/Seita.2G048300/Seita.2G297900/Seita.2G311400/Seita.2G320900/Seita.3G048100/Seita.4G001200/Seita.9G093700	8
cyan	CC	GO:0030018	Z disc	2/185	10/9955	0.0140132	0.0459869	0.0292937	Seita.5G383000/Seita.9G434900	2
cyan	CC	GO:0030897	HOPS complex	2/185	10/9955	0.0140132	0.0459869	0.0292937	Seita.2G399300/Seita.6G043600	2
cyan	CC	GO:0031674	I band	2/185	10/9955	0.0140132	0.0459869	0.0292937	Seita.5G383000/Seita.9G434900	2
cyan	CC	GO:0033263	CORVET complex	2/185	10/9955	0.0140132	0.0459869	0.0292937	Seita.2G399300/Seita.6G043600	2
cyan	MF	GO:0008092	cytoskeletal protein binding	13/132	185/8539	5.15521e-06	0.00142799	0.00119384	Seita.1G142900/Seita.2G223600/Seita.2G354300/Seita.2G376700/Seita.5G247900/Seita.5G359000/Seita.5G383000/Seita.5G454400/Seita.7G201900/Seita.9G197000/Seita.9G201000/Seita.9G213200/Seita.9G434900	13
cyan	MF	GO:0008139	nuclear localization sequence binding	4/132	22/8539	0.000321551	0.0197722	0.0165301	Seita.7G268000/Seita.7G335200/Seita.9G222800/Seita.9G523200	4
cyan	MF	GO:0019899	enzyme binding	16/132	394/8539	0.000359838	0.0197722	0.0165301	Seita.1G366200/Seita.2G331100/Seita.2G354300/Seita.3G048100/Seita.3G212600/Seita.3G405200/Seita.4G001200/Seita.4G195400/Seita.5G208400/Seita.5G233700/Seita.5G383000/Seita.6G191800/Seita.8G100700/Seita.9G165300/Seita.9G190100/Seita.9G470100	16
cyan	MF	GO:0003779	actin binding	6/132	64/8539	0.000437956	0.0197722	0.0165301	Seita.2G376700/Seita.5G247900/Seita.5G383000/Seita.5G454400/Seita.9G201000/Seita.9G213200	6
cyan	MF	GO:0005200	structural constituent of cytoskeleton	4/132	24/8539	0.000456041	0.0197722	0.0165301	Seita.2G223600/Seita.5G247900/Seita.5G383000/Seita.7G201900	4
cyan	MF	GO:0008565	protein transporter activity	5/132	43/8539	0.000491594	0.0197722	0.0165301	Seita.7G051600/Seita.7G268000/Seita.9G011900/Seita.9G051300/Seita.9G222800	5
cyan	MF	GO:0051015	actin filament binding	5/132	44/8539	0.000547814	0.0197722	0.0165301	Seita.5G247900/Seita.5G383000/Seita.5G454400/Seita.9G201000/Seita.9G213200	5
cyan	MF	GO:0030674	protein binding, bridging	4/132	26/8539	0.000626444	0.0197722	0.0165301	Seita.2G399300/Seita.5G208400/Seita.6G043600/Seita.7G328200	4
cyan	MF	GO:0051020	GTPase binding	7/132	95/8539	0.000642419	0.0197722	0.0165301	Seita.1G366200/Seita.2G354300/Seita.3G212600/Seita.4G195400/Seita.8G100700/Seita.9G165300/Seita.9G470100	7
cyan	MF	GO:0060589	nucleoside-triphosphatase regulator activity	5/132	50/8539	0.000992535	0.0264646	0.0221251	Seita.1G002600/Seita.1G366200/Seita.3G212600/Seita.3G264100/Seita.9G197000	5
cyan	MF	GO:0017056	structural constituent of nuclear pore	3/132	14/8539	0.00116025	0.0264646	0.0221251	Seita.7G105700/Seita.7G335200/Seita.9G523200	3
cyan	MF	GO:0005048	signal sequence binding	4/132	31/8539	0.00124202	0.0264646	0.0221251	Seita.7G268000/Seita.7G335200/Seita.9G222800/Seita.9G523200	4
cyan	MF	GO:0060090	molecular adaptor activity	4/132	31/8539	0.00124202	0.0264646	0.0221251	Seita.2G399300/Seita.5G208400/Seita.6G043600/Seita.7G328200	4
darkgreen	BP	GO:0010091	trichome branching	44286	39/9983	0.000229736	0.0378864	0.0332545	Seita.1G335800/Seita.4G084600/Seita.9G489700	3
darkgreen	BP	GO:0090626	plant epidermis morphogenesis	4/31	106/9983	0.000303016	0.0378864	0.0332545	Seita.1G325800/Seita.1G335800/Seita.4G084600/Seita.9G489700	4
darkgreen	BP	GO:0010226	response to lithium ion	2/31	11/9983	0.000504422	0.0378864	0.0332545	Seita.1G235300/Seita.1G364700	2
darkgreen	BP	GO:0009664	plant-type cell wall organization	4/31	125/9983	0.000567332	0.0378864	0.0332545	Seita.1G335800/Seita.4G084600/Seita.5G463300/Seita.9G471200	4
darkgreen	BP	GO:0048497	maintenance of floral organ identity	2/31	13/9983	0.000712597	0.0378864	0.0332545	Seita.1G335800/Seita.4G084600	2
darkgreen	BP	GO:0090700	maintenance of plant organ identity	2/31	13/9983	0.000712597	0.0378864	0.0332545	Seita.1G335800/Seita.4G084600	2
darkgrey	BP	GO:0009123	nucleoside monophosphate metabolic process	5/40	114/9983	8.50561e-05	0.0170209	0.0153378	Seita.6G052100/Seita.6G184900/Seita.7G016800/Seita.8G110300/Seita.9G074400	5
darkgrey	BP	GO:0042775	mitochondrial ATP synthesis coupled electron transport	3/40	24/9983	0.000113789	0.0170209	0.0153378	Seita.6G052100/Seita.7G016800/Seita.9G074400	3
darkgrey	BP	GO:0006119	oxidative phosphorylation	3/40	25/9983	0.000128946	0.0170209	0.0153378	Seita.6G052100/Seita.7G016800/Seita.9G074400	3
darkgrey	BP	GO:0042773	ATP synthesis coupled electron transport	3/40	25/9983	0.000128946	0.0170209	0.0153378	Seita.6G052100/Seita.7G016800/Seita.9G074400	3
darkgrey	BP	GO:0022904	respiratory electron transport chain	3/40	29/9983	0.000202593	0.0177775	0.0160196	Seita.6G052100/Seita.7G016800/Seita.9G074400	3
darkgrey	BP	GO:0006163	purine nucleotide metabolic process	5/40	143/9983	0.000247125	0.0177775	0.0160196	Seita.6G052100/Seita.6G184900/Seita.7G016800/Seita.8G110300/Seita.9G074400	5
darkgrey	BP	GO:0046034	ATP metabolic process	4/40	81/9983	0.00029438	0.0177775	0.0160196	Seita.6G052100/Seita.6G184900/Seita.7G016800/Seita.9G074400	4
darkgrey	BP	GO:0009126	purine nucleoside monophosphate metabolic process	4/40	85/9983	0.000354158	0.0177775	0.0160196	Seita.6G052100/Seita.6G184900/Seita.7G016800/Seita.9G074400	4
darkgrey	BP	GO:0009167	purine ribonucleoside monophosphate metabolic process	4/40	85/9983	0.000354158	0.0177775	0.0160196	Seita.6G052100/Seita.6G184900/Seita.7G016800/Seita.9G074400	4
darkgrey	BP	GO:0009144	purine nucleoside triphosphate metabolic process	4/40	86/9983	0.000370366	0.0177775	0.0160196	Seita.6G052100/Seita.6G184900/Seita.7G016800/Seita.9G074400	4
darkgrey	BP	GO:0009205	purine ribonucleoside triphosphate metabolic process	4/40	86/9983	0.000370366	0.0177775	0.0160196	Seita.6G052100/Seita.6G184900/Seita.7G016800/Seita.9G074400	4
darkgrey	BP	GO:0009199	ribonucleoside triphosphate metabolic process	4/40	93/9983	0.000499063	0.0219588	0.0197874	Seita.6G052100/Seita.6G184900/Seita.7G016800/Seita.9G074400	4
darkgrey	BP	GO:0072521	purine-containing compound metabolic process	5/40	173/9983	0.000593907	0.0229534	0.0206837	Seita.6G052100/Seita.6G184900/Seita.7G016800/Seita.8G110300/Seita.9G074400	5
darkgrey	BP	GO:0009161	ribonucleoside monophosphate metabolic process	4/40	98/9983	0.000608613	0.0229534	0.0206837	Seita.6G052100/Seita.6G184900/Seita.7G016800/Seita.9G074400	4
darkgrey	BP	GO:0010952	positive regulation of peptidase activity	2/40	10/9983	0.000690298	0.0233571	0.0210475	Seita.3G119900/Seita.3G160600	2
darkgrey	BP	GO:0009141	nucleoside triphosphate metabolic process	4/40	102/9983	0.000707791	0.0233571	0.0210475	Seita.6G052100/Seita.6G184900/Seita.7G016800/Seita.9G074400	4
darkgrey	BP	GO:0045862	positive regulation of proteolysis	3/40	45/9983	0.000752595	0.0233747	0.0210634	Seita.3G119900/Seita.3G160600/Seita.4G042600	3
darkgrey	BP	GO:0055086	nucleobase-containing small molecule metabolic process	6/40	307/9983	0.0012796	0.037535	0.0338234	Seita.1G297200/Seita.6G052100/Seita.6G184900/Seita.7G016800/Seita.8G110300/Seita.9G074400	6
darkgrey	BP	GO:0019637	organophosphate metabolic process	7/40	431/9983	0.00144079	0.0400388	0.0360796	Seita.6G052100/Seita.6G184900/Seita.7G016800/Seita.8G110300/Seita.9G072400/Seita.9G074400/Seita.9G176300	7
darkgrey	CC	GO:1905368	peptidase complex	9/55	55/9955	1.26543e-11	1.24012e-09	7.32616e-10	Seita.1G245700/Seita.3G119900/Seita.3G300800/Seita.4G028500/Seita.4G042600/Seita.4G059300/Seita.4G202500/Seita.5G354800/Seita.9G472500	9
darkgrey	CC	GO:0000502	proteasome complex	8/55	44/9955	7.77323e-11	2.53925e-09	1.5001e-09	Seita.1G245700/Seita.3G119900/Seita.4G028500/Seita.4G042600/Seita.4G059300/Seita.4G202500/Seita.5G354800/Seita.9G472500	8
darkgrey	CC	GO:1905369	endopeptidase complex	8/55	44/9955	7.77323e-11	2.53925e-09	1.5001e-09	Seita.1G245700/Seita.3G119900/Seita.4G028500/Seita.4G042600/Seita.4G059300/Seita.4G202500/Seita.5G354800/Seita.9G472500	8
darkgrey	CC	GO:0031966	mitochondrial membrane	11/55	209/9955	1.43071e-08	3.50524e-07	2.07077e-07	Seita.2G185300/Seita.2G194400/Seita.2G433500/Seita.3G063500/Seita.4G284900/Seita.5G221400/Seita.6G052100/Seita.6G184900/Seita.7G016800/Seita.9G136800/Seita.9G330200	11
darkgrey	CC	GO:0005743	mitochondrial inner membrane	10/55	172/9955	2.72795e-08	4.79555e-07	2.83303e-07	Seita.2G194400/Seita.2G433500/Seita.3G063500/Seita.4G284900/Seita.5G221400/Seita.6G052100/Seita.6G184900/Seita.7G016800/Seita.9G136800/Seita.9G330200	10
darkgrey	CC	GO:0005740	mitochondrial envelope	11/55	224/9955	2.93605e-08	4.79555e-07	2.83303e-07	Seita.2G185300/Seita.2G194400/Seita.2G433500/Seita.3G063500/Seita.4G284900/Seita.5G221400/Seita.6G052100/Seita.6G184900/Seita.7G016800/Seita.9G136800/Seita.9G330200	11
darkgrey	CC	GO:0005839	proteasome core complex	5/55	23/9955	1.33356e-07	1.86699e-06	1.10295e-06	Seita.1G245700/Seita.4G028500/Seita.4G059300/Seita.4G202500/Seita.5G354800	5
darkgrey	CC	GO:0019866	organelle inner membrane	10/55	216/9955	2.34129e-07	2.86808e-06	1.69436e-06	Seita.2G194400/Seita.2G433500/Seita.3G063500/Seita.4G284900/Seita.5G221400/Seita.6G052100/Seita.6G184900/Seita.7G016800/Seita.9G136800/Seita.9G330200	10
darkgrey	CC	GO:0098800	inner mitochondrial membrane protein complex	7/55	84/9955	3.45815e-07	3.76554e-06	2.22454e-06	Seita.2G194400/Seita.4G284900/Seita.5G221400/Seita.6G052100/Seita.6G184900/Seita.7G016800/Seita.9G330200	7
darkgrey	CC	GO:0044429	mitochondrial part	11/55	309/9955	7.62608e-07	7.47356e-06	4.4151e-06	Seita.2G185300/Seita.2G194400/Seita.2G433500/Seita.3G063500/Seita.4G284900/Seita.5G221400/Seita.6G052100/Seita.6G184900/Seita.7G016800/Seita.9G136800/Seita.9G330200	11
darkgrey	CC	GO:0044455	mitochondrial membrane part	7/55	108/9955	1.92298e-06	1.7132e-05	1.0121e-05	Seita.2G194400/Seita.4G284900/Seita.5G221400/Seita.6G052100/Seita.6G184900/Seita.7G016800/Seita.9G330200	7
darkgrey	CC	GO:0098798	mitochondrial protein complex	7/55	119/9955	3.68727e-06	3.01127e-05	1.77894e-05	Seita.2G194400/Seita.4G284900/Seita.5G221400/Seita.6G052100/Seita.6G184900/Seita.7G016800/Seita.9G330200	7
darkgrey	CC	GO:0005746	mitochondrial respiratory chain	5/55	50/9955	7.49845e-06	5.40878e-05	3.19531e-05	Seita.2G194400/Seita.4G284900/Seita.6G052100/Seita.7G016800/Seita.9G330200	5
darkgrey	CC	GO:0070469	respiratory chain	5/55	51/9955	8.27875e-06	5.40878e-05	3.19531e-05	Seita.2G194400/Seita.4G284900/Seita.6G052100/Seita.7G016800/Seita.9G330200	5
darkgrey	CC	GO:0098803	respiratory chain complex	5/55	51/9955	8.27875e-06	5.40878e-05	3.19531e-05	Seita.2G194400/Seita.4G284900/Seita.6G052100/Seita.7G016800/Seita.9G330200	5
darkgrey	CC	GO:1990204	oxidoreductase complex	5/55	60/9955	1.85358e-05	0.000107416	6.34571e-05	Seita.2G194400/Seita.4G284900/Seita.6G052100/Seita.7G016800/Seita.9G330200	5
darkgrey	CC	GO:0019773	proteasome core complex, alpha-subunit complex	3/55	10/9955	1.86333e-05	0.000107416	6.34571e-05	Seita.1G245700/Seita.4G059300/Seita.5G354800	3
darkgrey	CC	GO:0098796	membrane protein complex	9/55	304/9955	3.78873e-05	0.000206275	0.00012186	Seita.2G194400/Seita.3G300800/Seita.4G284900/Seita.5G221400/Seita.6G052100/Seita.6G184900/Seita.7G016800/Seita.9G330200/Seita.9G370800	9
darkgrey	CC	GO:0005747	mitochondrial respiratory chain complex I	3/55	33/9955	0.000774272	0.00379393	0.00224131	Seita.4G284900/Seita.6G052100/Seita.9G330200	3
darkgrey	CC	GO:0045271	respiratory chain complex I	3/55	33/9955	0.000774272	0.00379393	0.00224131	Seita.4G284900/Seita.6G052100/Seita.9G330200	3
darkgrey	CC	GO:0030964	NADH dehydrogenase complex	3/55	36/9955	0.00100145	0.00467345	0.0027609	Seita.4G284900/Seita.6G052100/Seita.9G330200	3
darkgrey	CC	GO:0019774	proteasome core complex, beta-subunit complex	2/55	12/9955	0.00190916	0.00813468	0.00480567	Seita.4G028500/Seita.4G202500	2
darkgrey	CC	GO:0045259	proton-transporting ATP synthase complex	2/55	12/9955	0.00190916	0.00813468	0.00480567	Seita.5G221400/Seita.6G184900	2
darkgrey	CC	GO:0005685	U1 snRNP	2/55	13/9955	0.0022483	0.00847436	0.00500634	Seita.1G065900/Seita.1G067900	2
darkgrey	CC	GO:0005838	proteasome regulatory particle	2/55	13/9955	0.0022483	0.00847436	0.00500634	Seita.3G119900/Seita.4G042600	2
darkgrey	CC	GO:0022624	proteasome accessory complex	2/55	13/9955	0.0022483	0.00847436	0.00500634	Seita.3G119900/Seita.4G042600	2
darkgrey	CC	GO:0000418	RNA polymerase IV complex	2/55	17/9955	0.003865	0.0135275	0.00799154	Seita.2G121900/Seita.2G388500	2
darkgrey	CC	GO:0000419	RNA polymerase V complex	2/55	17/9955	0.003865	0.0135275	0.00799154	Seita.2G121900/Seita.2G388500	2
darkgrey	CC	GO:0016469	proton-transporting two-sector ATPase complex	2/55	18/9955	0.00433278	0.0146418	0.00864982	Seita.5G221400/Seita.6G184900	2
darkgrey	CC	GO:0005665	RNA polymerase II, core complex	2/55	22/9955	0.00644984	0.0210695	0.0124471	Seita.2G121900/Seita.2G388500	2
darkgrey	CC	GO:0016591	RNA polymerase II, holoenzyme	3/55	81/9955	0.0100475	0.0317629	0.0187643	Seita.2G121900/Seita.2G283900/Seita.2G388500	3
darkgrey	CC	GO:0061695	transferase complex, transferring phosphorus-containing groups	4/55	161/9955	0.0118565	0.0363106	0.0214509	Seita.2G121900/Seita.2G263900/Seita.2G283900/Seita.2G388500	4
darkolivegreen	BP	GO:0009627	systemic acquired resistance	44232	67/9983	0.000438	0.04161	0.0221305	Seita.6G189900/Seita.8G073700	2
darkorange	MF	GO:0016647	oxidoreductase activity, acting on the CH-NH group of donors, oxygen as acceptor	44239	11/8539	9.88826e-05	0.00207654	0.00145722	Seita.5G020700/Seita.5G020800	2
darkorange	MF	GO:0016645	oxidoreductase activity, acting on the CH-NH group of donors	44239	35/8539	0.00104986	0.0110236	0.00773585	Seita.5G020700/Seita.5G020800	2
green	BP	GO:0046688	response to copper ion	5/297	13/9983	2.38346e-05	0.0363239	0.0358021	Seita.1G127700/Seita.5G365900/Seita.7G194000/Seita.7G330200/Seita.8G018100	5
green	CC	GO:0005618	cell wall	35/288	490/9955	6.23025e-07	7.2885e-05	7.08724e-05	Seita.1G180600/Seita.1G295700/Seita.1G335200/Seita.2G154700/Seita.2G396200/Seita.3G067600/Seita.3G162000/Seita.3G190400/Seita.3G198900/Seita.3G202900/Seita.3G263800/Seita.3G270300/Seita.3G310700/Seita.4G021600/Seita.4G148700/Seita.4G169700/Seita.4G259700/Seita.5G053000/Seita.5G053100/Seita.5G118700/Seita.5G263600/Seita.5G357900/Seita.5G409400/Seita.5G467700/Seita.6G087600/Seita.6G105300/Seita.7G1…	35
green	CC	GO:0030312	external encapsulating structure	35/288	491/9955	6.53677e-07	7.2885e-05	7.08724e-05	Seita.1G180600/Seita.1G295700/Seita.1G335200/Seita.2G154700/Seita.2G396200/Seita.3G067600/Seita.3G162000/Seita.3G190400/Seita.3G198900/Seita.3G202900/Seita.3G263800/Seita.3G270300/Seita.3G310700/Seita.4G021600/Seita.4G148700/Seita.4G169700/Seita.4G259700/Seita.5G053000/Seita.5G053100/Seita.5G118700/Seita.5G263600/Seita.5G357900/Seita.5G409400/Seita.5G467700/Seita.6G087600/Seita.6G105300/Seita.7G1…	35
green	CC	GO:0009505	plant-type cell wall	18/288	220/9955	6.81054e-05	0.0050625	0.0049227	Seita.3G162000/Seita.3G190400/Seita.3G198900/Seita.3G202900/Seita.3G270300/Seita.3G310700/Seita.4G021600/Seita.4G169700/Seita.4G259700/Seita.5G053000/Seita.5G053100/Seita.5G263600/Seita.5G357900/Seita.5G409400/Seita.7G138500/Seita.8G230000/Seita.9G344800/Seita.9G486000	18
greenyellow	BP	GO:0022402	cell cycle process	55/181	436/9983	5.01234e-32	6.3356e-29	5.0862e-29	Seita.1G052600/Seita.1G095100/Seita.1G170500/Seita.1G214700/Seita.1G314900/Seita.1G329800/Seita.1G376600/Seita.2G326500/Seita.2G391700/Seita.2G406300/Seita.3G083100/Seita.3G086800/Seita.3G151900/Seita.3G183600/Seita.3G192100/Seita.3G198000/Seita.3G217300/Seita.3G318600/Seita.3G379200/Seita.4G049800/Seita.4G085900/Seita.4G276600/Seita.5G005800/Seita.5G008900/Seita.5G056000/Seita.5G114900/Seita.5G1…	55
greenyellow	BP	GO:1903047	mitotic cell cycle process	35/181	235/9983	1.25499e-22	7.93157e-20	6.36745e-20	Seita.1G052600/Seita.1G170500/Seita.1G214700/Seita.1G376600/Seita.2G326500/Seita.2G391700/Seita.2G406300/Seita.3G083100/Seita.3G086800/Seita.3G151900/Seita.3G192100/Seita.3G217300/Seita.3G379200/Seita.4G049800/Seita.4G085900/Seita.4G276600/Seita.5G056000/Seita.5G114900/Seita.5G179700/Seita.5G274500/Seita.5G316800/Seita.5G413200/Seita.6G228300/Seita.7G134400/Seita.7G144300/Seita.7G147500/Seita.7G1…	35
greenyellow	BP	GO:0000278	mitotic cell cycle	39/181	310/9983	1.95139e-22	8.22186e-20	6.60049e-20	Seita.1G052200/Seita.1G052600/Seita.1G170500/Seita.1G214700/Seita.1G376600/Seita.2G326500/Seita.2G391700/Seita.2G406300/Seita.3G083100/Seita.3G086800/Seita.3G151900/Seita.3G192100/Seita.3G217300/Seita.3G379200/Seita.4G049800/Seita.4G085900/Seita.4G276600/Seita.5G056000/Seita.5G114900/Seita.5G179700/Seita.5G274500/Seita.5G316800/Seita.5G413200/Seita.6G101100/Seita.6G228300/Seita.7G134400/Seita.7G1…	39
greenyellow	BP	GO:0006261	DNA-dependent DNA replication	27/181	130/9983	1.61809e-21	5.11317e-19	4.10484e-19	Seita.1G170500/Seita.1G214700/Seita.1G314900/Seita.1G352100/Seita.1G376600/Seita.2G290600/Seita.2G400500/Seita.3G086800/Seita.3G205800/Seita.3G335500/Seita.4G276600/Seita.5G008900/Seita.5G114900/Seita.5G117500/Seita.5G192100/Seita.5G387100/Seita.6G228300/Seita.7G134400/Seita.7G141700/Seita.7G304300/Seita.7G307400/Seita.8G007000/Seita.8G011000/Seita.8G121500/Seita.9G084200/Seita.9G319400/Seita.9G4…	27
greenyellow	BP	GO:0006260	DNA replication	28/181	158/9983	2.63092e-20	5.99689e-18	4.81429e-18	Seita.1G170500/Seita.1G214700/Seita.1G314900/Seita.1G352100/Seita.1G376600/Seita.2G290600/Seita.2G400500/Seita.3G086800/Seita.3G205800/Seita.3G335500/Seita.4G276600/Seita.5G008900/Seita.5G114900/Seita.5G117500/Seita.5G192100/Seita.5G387100/Seita.6G228300/Seita.7G134400/Seita.7G141700/Seita.7G304300/Seita.7G307400/Seita.8G007000/Seita.8G011000/Seita.8G121500/Seita.9G084200/Seita.9G319400/Seita.9G4…	28
greenyellow	BP	GO:0006259	DNA metabolic process	45/181	489/9983	2.84663e-20	5.99689e-18	4.81429e-18	Seita.1G170500/Seita.1G214700/Seita.1G314900/Seita.1G329800/Seita.1G337000/Seita.1G352100/Seita.1G376600/Seita.2G023300/Seita.2G217400/Seita.2G290600/Seita.2G400500/Seita.3G086800/Seita.3G115400/Seita.3G183600/Seita.3G205800/Seita.3G335500/Seita.4G276600/Seita.5G008900/Seita.5G114900/Seita.5G117500/Seita.5G128200/Seita.5G192100/Seita.5G387100/Seita.5G413200/Seita.6G101100/Seita.6G228300/Seita.7G0…	45
greenyellow	BP	GO:0000280	nuclear division	29/181	202/9983	2.23106e-18	4.02866e-16	3.2342e-16	Seita.1G052600/Seita.1G214700/Seita.1G329800/Seita.2G326500/Seita.3G083100/Seita.3G151900/Seita.3G192100/Seita.3G198000/Seita.3G217300/Seita.3G318600/Seita.3G379200/Seita.4G085900/Seita.5G005800/Seita.5G114900/Seita.5G179700/Seita.5G274500/Seita.6G228300/Seita.7G058500/Seita.7G134400/Seita.7G138000/Seita.7G144300/Seita.7G154600/Seita.8G146100/Seita.9G069600/Seita.9G120500/Seita.9G233200/Seita.9G2…	29
greenyellow	BP	GO:0010564	regulation of cell cycle process	24/181	129/9983	4.93386e-18	7.7955e-16	6.25821e-16	Seita.1G052600/Seita.1G214700/Seita.1G314900/Seita.2G326500/Seita.2G391700/Seita.3G083100/Seita.3G183600/Seita.4G049800/Seita.4G276600/Seita.5G008900/Seita.5G114900/Seita.5G413200/Seita.6G228300/Seita.7G134400/Seita.7G144300/Seita.7G163500/Seita.7G304300/Seita.7G307400/Seita.8G007000/Seita.8G011000/Seita.8G146100/Seita.9G128400/Seita.9G319400/Seita.9G491000	24
greenyellow	BP	GO:0048285	organelle fission	30/181	241/9983	3.2939e-17	4.62611e-15	3.71383e-15	Seita.1G052600/Seita.1G214700/Seita.1G329800/Seita.2G326500/Seita.3G083100/Seita.3G151900/Seita.3G192100/Seita.3G198000/Seita.3G217300/Seita.3G318600/Seita.3G379200/Seita.4G085900/Seita.5G005800/Seita.5G114900/Seita.5G179700/Seita.5G274500/Seita.5G316800/Seita.6G228300/Seita.7G058500/Seita.7G134400/Seita.7G138000/Seita.7G144300/Seita.7G154600/Seita.8G146100/Seita.9G069600/Seita.9G120500/Seita.9G2…	30
greenyellow	BP	GO:0007018	microtubule-based movement	18/181	77/9983	1.23428e-15	1.56013e-13	1.25247e-13	Seita.1G052200/Seita.1G317100/Seita.1G360100/Seita.2G406300/Seita.3G151900/Seita.3G217300/Seita.3G251500/Seita.5G179700/Seita.5G218400/Seita.6G243300/Seita.7G058500/Seita.7G130100/Seita.8G146100/Seita.9G090900/Seita.9G177700/Seita.9G284500/Seita.9G449500/Seita.J002300	18
greenyellow	BP	GO:0051726	regulation of cell cycle	28/181	257/9983	1.33747e-14	1.53687e-12	1.2338e-12	Seita.1G052600/Seita.1G095100/Seita.1G214700/Seita.1G314900/Seita.2G326500/Seita.2G391700/Seita.3G083100/Seita.3G183600/Seita.3G318600/Seita.4G049800/Seita.4G276600/Seita.5G005800/Seita.5G008900/Seita.5G114900/Seita.5G413200/Seita.6G228300/Seita.7G134400/Seita.7G144300/Seita.7G163500/Seita.7G258800/Seita.7G304300/Seita.7G307400/Seita.8G007000/Seita.8G011000/Seita.8G146100/Seita.9G128400/Seita.9G3…	28
greenyellow	BP	GO:0007017	microtubule-based process	23/181	169/9983	3.10705e-14	3.17348e-12	2.54767e-12	Seita.1G052200/Seita.1G317100/Seita.1G360100/Seita.2G161300/Seita.2G391700/Seita.2G406300/Seita.3G151900/Seita.3G217300/Seita.3G251500/Seita.5G056000/Seita.5G114900/Seita.5G179700/Seita.5G218400/Seita.5G274500/Seita.6G243300/Seita.7G058500/Seita.7G130100/Seita.8G146100/Seita.9G090900/Seita.9G177700/Seita.9G284500/Seita.9G449500/Seita.J002300	23
greenyellow	BP	GO:0044770	cell cycle phase transition	17/181	79/9983	3.48846e-14	3.17348e-12	2.54767e-12	Seita.1G052600/Seita.1G170500/Seita.2G326500/Seita.3G083100/Seita.3G086800/Seita.4G049800/Seita.4G276600/Seita.5G413200/Seita.6G228300/Seita.7G144300/Seita.7G304300/Seita.7G307400/Seita.8G007000/Seita.8G011000/Seita.8G146100/Seita.9G128400/Seita.9G319400	17
greenyellow	BP	GO:0044786	cell cycle DNA replication	16/181	67/9983	3.51494e-14	3.17348e-12	2.54767e-12	Seita.1G214700/Seita.1G314900/Seita.1G376600/Seita.3G086800/Seita.4G276600/Seita.5G008900/Seita.5G114900/Seita.5G387100/Seita.6G228300/Seita.7G134400/Seita.7G304300/Seita.7G307400/Seita.8G007000/Seita.8G011000/Seita.9G319400/Seita.9G491000	16
greenyellow	BP	GO:0044772	mitotic cell cycle phase transition	16/181	74/9983	1.88433e-13	1.58786e-11	1.27473e-11	Seita.1G052600/Seita.1G170500/Seita.2G326500/Seita.3G083100/Seita.3G086800/Seita.4G049800/Seita.4G276600/Seita.5G413200/Seita.6G228300/Seita.7G144300/Seita.7G304300/Seita.7G307400/Seita.8G007000/Seita.8G011000/Seita.8G146100/Seita.9G319400	16
greenyellow	BP	GO:0006270	DNA replication initiation	10/181	20/9983	4.72718e-13	3.73447e-11	2.99802e-11	Seita.1G352100/Seita.2G290600/Seita.2G400500/Seita.3G086800/Seita.5G192100/Seita.7G307400/Seita.8G007000/Seita.8G121500/Seita.9G084200/Seita.9G319400	10
greenyellow	BP	GO:0140013	meiotic nuclear division	19/181	123/9983	5.9408e-13	4.41716e-11	3.54609e-11	Seita.1G052600/Seita.1G214700/Seita.1G329800/Seita.2G326500/Seita.3G198000/Seita.3G318600/Seita.4G085900/Seita.5G005800/Seita.5G114900/Seita.6G228300/Seita.7G058500/Seita.7G134400/Seita.7G138000/Seita.7G154600/Seita.9G069600/Seita.9G120500/Seita.9G233200/Seita.9G258800/Seita.J002300	19
greenyellow	BP	GO:1903046	meiotic cell cycle process	21/181	158/9983	7.05077e-13	4.95121e-11	3.97482e-11	Seita.1G052600/Seita.1G214700/Seita.1G329800/Seita.2G326500/Seita.3G198000/Seita.3G318600/Seita.4G085900/Seita.5G005800/Seita.5G056000/Seita.5G114900/Seita.6G228300/Seita.7G058500/Seita.7G134400/Seita.7G138000/Seita.7G154600/Seita.9G069600/Seita.9G120500/Seita.9G233200/Seita.9G258800/Seita.9G491000/Seita.J002300	21
greenyellow	BP	GO:0098813	nuclear chromosome segregation	19/181	125/9983	8.01836e-13	5.33432e-11	4.28238e-11	Seita.1G052600/Seita.2G326500/Seita.3G083100/Seita.3G151900/Seita.3G192100/Seita.3G198000/Seita.3G217300/Seita.5G114900/Seita.5G117500/Seita.6G101100/Seita.6G228300/Seita.7G138000/Seita.7G144300/Seita.7G154600/Seita.8G146100/Seita.9G120500/Seita.9G233200/Seita.9G258800/Seita.9G491000	19
greenyellow	BP	GO:0007059	chromosome segregation	19/181	131/9983	1.90682e-12	1.20511e-10	9.67462e-11	Seita.1G052600/Seita.2G326500/Seita.3G083100/Seita.3G151900/Seita.3G192100/Seita.3G198000/Seita.3G217300/Seita.5G114900/Seita.5G117500/Seita.6G101100/Seita.6G228300/Seita.7G138000/Seita.7G144300/Seita.7G154600/Seita.8G146100/Seita.9G120500/Seita.9G233200/Seita.9G258800/Seita.9G491000	19
greenyellow	BP	GO:1901987	regulation of cell cycle phase transition	14/181	60/9983	2.09917e-12	1.2635e-10	1.01433e-10	Seita.1G052600/Seita.2G326500/Seita.3G083100/Seita.4G049800/Seita.4G276600/Seita.5G413200/Seita.7G144300/Seita.7G304300/Seita.7G307400/Seita.8G007000/Seita.8G011000/Seita.8G146100/Seita.9G128400/Seita.9G319400	14
greenyellow	BP	GO:0051321	meiotic cell cycle	21/181	170/9983	3.01404e-12	1.7317e-10	1.39021e-10	Seita.1G052600/Seita.1G214700/Seita.1G329800/Seita.2G326500/Seita.3G198000/Seita.3G318600/Seita.4G085900/Seita.5G005800/Seita.5G056000/Seita.5G114900/Seita.6G228300/Seita.7G058500/Seita.7G134400/Seita.7G138000/Seita.7G154600/Seita.9G069600/Seita.9G120500/Seita.9G233200/Seita.9G258800/Seita.9G491000/Seita.J002300	21
greenyellow	BP	GO:0071103	DNA conformation change	17/181	103/9983	3.44009e-12	1.89055e-10	1.51773e-10	Seita.1G352100/Seita.2G023300/Seita.3G115400/Seita.3G192100/Seita.3G198000/Seita.3G205800/Seita.3G227400/Seita.3G335500/Seita.4G066200/Seita.5G192100/Seita.5G413200/Seita.7G307400/Seita.8G007000/Seita.8G121500/Seita.8G229300/Seita.9G112500/Seita.9G491000	17
greenyellow	BP	GO:0090329	regulation of DNA-dependent DNA replication	12/181	41/9983	4.37538e-12	2.30437e-10	1.84994e-10	Seita.1G314900/Seita.1G352100/Seita.5G008900/Seita.5G114900/Seita.5G192100/Seita.6G228300/Seita.7G304300/Seita.7G307400/Seita.8G007000/Seita.8G011000/Seita.8G121500/Seita.9G319400	12
greenyellow	BP	GO:0006928	movement of cell or subcellular component	19/181	139/9983	5.63611e-12	2.84962e-10	2.28767e-10	Seita.1G052200/Seita.1G317100/Seita.1G360100/Seita.2G406300/Seita.3G151900/Seita.3G217300/Seita.3G251500/Seita.5G056000/Seita.5G179700/Seita.5G218400/Seita.6G243300/Seita.7G058500/Seita.7G130100/Seita.8G146100/Seita.9G090900/Seita.9G177700/Seita.9G284500/Seita.9G449500/Seita.J002300	19
greenyellow	BP	GO:1901990	regulation of mitotic cell cycle phase transition	13/181	55/9983	1.1097e-11	5.39487e-10	4.33099e-10	Seita.1G052600/Seita.2G326500/Seita.3G083100/Seita.4G049800/Seita.4G276600/Seita.5G413200/Seita.7G144300/Seita.7G304300/Seita.7G307400/Seita.8G007000/Seita.8G011000/Seita.8G146100/Seita.9G319400	13
greenyellow	BP	GO:0006275	regulation of DNA replication	12/181	45/9983	1.49576e-11	7.00238e-10	5.62149e-10	Seita.1G314900/Seita.1G352100/Seita.5G008900/Seita.5G114900/Seita.5G192100/Seita.6G228300/Seita.7G304300/Seita.7G307400/Seita.8G007000/Seita.8G011000/Seita.8G121500/Seita.9G319400	12
greenyellow	BP	GO:0007135	meiosis II	9/181	20/9983	2.45509e-11	1.07008e-09	8.59057e-10	Seita.1G052600/Seita.1G214700/Seita.2G326500/Seita.3G318600/Seita.5G005800/Seita.7G134400/Seita.7G154600/Seita.9G069600/Seita.9G233200	9
greenyellow	BP	GO:0061983	meiosis II cell cycle process	9/181	20/9983	2.45509e-11	1.07008e-09	8.59057e-10	Seita.1G052600/Seita.1G214700/Seita.2G326500/Seita.3G318600/Seita.5G005800/Seita.7G134400/Seita.7G154600/Seita.9G069600/Seita.9G233200	9
greenyellow	BP	GO:0051052	regulation of DNA metabolic process	17/181	126/9983	9.63004e-11	4.05746e-09	3.25732e-09	Seita.1G314900/Seita.1G329800/Seita.1G352100/Seita.2G023300/Seita.3G115400/Seita.5G008900/Seita.5G114900/Seita.5G192100/Seita.6G228300/Seita.7G304300/Seita.7G307400/Seita.8G007000/Seita.8G011000/Seita.8G121500/Seita.9G112500/Seita.9G319400/Seita.9G491000	17
greenyellow	BP	GO:0032508	DNA duplex unwinding	11/181	45/9983	3.05065e-10	1.24388e-08	9.98584e-09	Seita.1G352100/Seita.2G023300/Seita.3G205800/Seita.3G335500/Seita.5G192100/Seita.7G307400/Seita.8G007000/Seita.8G121500/Seita.8G229300/Seita.9G112500/Seita.9G491000	11
greenyellow	BP	GO:0007346	regulation of mitotic cell cycle	17/181	136/9983	3.28712e-10	1.29841e-08	1.04236e-08	Seita.1G052600/Seita.1G214700/Seita.2G326500/Seita.3G083100/Seita.4G049800/Seita.4G276600/Seita.5G114900/Seita.5G413200/Seita.7G134400/Seita.7G144300/Seita.7G304300/Seita.7G307400/Seita.8G007000/Seita.8G011000/Seita.8G146100/Seita.9G319400/Seita.9G491000	17
greenyellow	BP	GO:0140014	mitotic nuclear division	14/181	87/9983	4.27518e-10	1.63752e-08	1.3146e-08	Seita.1G052600/Seita.1G214700/Seita.2G326500/Seita.3G083100/Seita.3G151900/Seita.3G192100/Seita.3G217300/Seita.3G379200/Seita.5G179700/Seita.7G134400/Seita.7G144300/Seita.7G154600/Seita.8G146100/Seita.9G491000	14
greenyellow	BP	GO:0032392	DNA geometric change	11/181	47/9983	5.07234e-10	1.88572e-08	1.51385e-08	Seita.1G352100/Seita.2G023300/Seita.3G205800/Seita.3G335500/Seita.5G192100/Seita.7G307400/Seita.8G007000/Seita.8G121500/Seita.8G229300/Seita.9G112500/Seita.9G491000	11
greenyellow	BP	GO:0000082	G1/S transition of mitotic cell cycle	9/181	27/9983	6.14093e-10	2.21775e-08	1.78041e-08	Seita.1G170500/Seita.3G086800/Seita.4G049800/Seita.6G228300/Seita.7G304300/Seita.7G307400/Seita.8G007000/Seita.8G011000/Seita.9G319400	9
greenyellow	BP	GO:0000819	sister chromatid segregation	13/181	77/9983	9.93039e-10	3.48667e-08	2.79909e-08	Seita.1G052600/Seita.2G326500/Seita.3G083100/Seita.3G151900/Seita.3G192100/Seita.3G217300/Seita.5G117500/Seita.6G101100/Seita.7G144300/Seita.7G154600/Seita.8G146100/Seita.9G233200/Seita.9G491000	13
greenyellow	BP	GO:0044843	cell cycle G1/S phase transition	9/181	29/9983	1.27186e-09	4.34494e-08	3.48811e-08	Seita.1G170500/Seita.3G086800/Seita.4G049800/Seita.6G228300/Seita.7G304300/Seita.7G307400/Seita.8G007000/Seita.8G011000/Seita.9G319400	9
greenyellow	BP	GO:0045786	negative regulation of cell cycle	13/181	90/9983	7.23459e-09	2.40645e-07	1.9319e-07	Seita.1G052600/Seita.1G095100/Seita.1G314900/Seita.2G326500/Seita.3G083100/Seita.3G183600/Seita.7G144300/Seita.7G163500/Seita.7G307400/Seita.8G007000/Seita.9G128400/Seita.9G319400/Seita.9G491000	13
greenyellow	BP	GO:0000070	mitotic sister chromatid segregation	10/181	51/9983	2.00995e-08	6.51431e-07	5.22968e-07	Seita.1G052600/Seita.2G326500/Seita.3G083100/Seita.3G151900/Seita.3G192100/Seita.3G217300/Seita.7G144300/Seita.7G154600/Seita.8G146100/Seita.9G491000	10
greenyellow	BP	GO:0000724	double-strand break repair via homologous recombination	11/181	67/9983	2.73216e-08	8.63362e-07	6.93105e-07	Seita.1G329800/Seita.3G183600/Seita.5G114900/Seita.5G413200/Seita.7G154600/Seita.7G163500/Seita.7G307400/Seita.8G007000/Seita.8G229300/Seita.9G319400/Seita.9G491000	11
greenyellow	BP	GO:0000725	recombinational repair	11/181	68/9983	3.20856e-08	9.89174e-07	7.94107e-07	Seita.1G329800/Seita.3G183600/Seita.5G114900/Seita.5G413200/Seita.7G154600/Seita.7G163500/Seita.7G307400/Seita.8G007000/Seita.8G229300/Seita.9G319400/Seita.9G491000	11
greenyellow	BP	GO:0006281	DNA repair	20/181	258/9983	4.05189e-08	1.21943e-06	9.78953e-07	Seita.1G170500/Seita.1G329800/Seita.1G337000/Seita.1G376600/Seita.2G217400/Seita.3G183600/Seita.5G114900/Seita.5G117500/Seita.5G128200/Seita.5G413200/Seita.6G101100/Seita.7G141700/Seita.7G154600/Seita.7G163500/Seita.7G307400/Seita.8G007000/Seita.8G229300/Seita.9G128400/Seita.9G319400/Seita.9G491000	20
greenyellow	BP	GO:1902749	regulation of cell cycle G2/M phase transition	7/181	21/9983	5.38182e-08	1.58201e-06	1.27003e-06	Seita.4G049800/Seita.4G276600/Seita.5G413200/Seita.7G304300/Seita.8G011000/Seita.9G128400/Seita.9G319400	7
greenyellow	BP	GO:0006974	cellular response to DNA damage stimulus	22/181	317/9983	5.98055e-08	1.71298e-06	1.37518e-06	Seita.1G170500/Seita.1G329800/Seita.1G337000/Seita.1G376600/Seita.2G217400/Seita.3G183600/Seita.4G091000/Seita.4G216500/Seita.5G114900/Seita.5G117500/Seita.5G128200/Seita.5G413200/Seita.6G101100/Seita.7G141700/Seita.7G154600/Seita.7G163500/Seita.7G307400/Seita.8G007000/Seita.8G229300/Seita.9G128400/Seita.9G319400/Seita.9G491000	22
greenyellow	BP	GO:0006302	double-strand break repair	13/181	107/9983	6.09844e-08	1.71298e-06	1.37518e-06	Seita.1G329800/Seita.2G217400/Seita.3G183600/Seita.5G114900/Seita.5G413200/Seita.6G101100/Seita.7G154600/Seita.7G163500/Seita.7G307400/Seita.8G007000/Seita.8G229300/Seita.9G319400/Seita.9G491000	13
greenyellow	BP	GO:0010948	negative regulation of cell cycle process	10/181	58/9983	7.35485e-08	2.02098e-06	1.62244e-06	Seita.1G052600/Seita.1G314900/Seita.2G326500/Seita.3G083100/Seita.7G144300/Seita.7G307400/Seita.8G007000/Seita.9G128400/Seita.9G319400/Seita.9G491000	10
greenyellow	BP	GO:0033260	nuclear DNA replication	7/181	22/9983	7.77315e-08	2.09048e-06	1.67823e-06	Seita.1G376600/Seita.3G086800/Seita.5G114900/Seita.7G307400/Seita.8G007000/Seita.9G319400/Seita.9G491000	7
greenyellow	BP	GO:0051128	regulation of cellular component organization	26/181	438/9983	8.21051e-08	2.1621e-06	1.73573e-06	Seita.1G052600/Seita.1G081300/Seita.1G214700/Seita.2G023300/Seita.2G326500/Seita.3G083100/Seita.3G115400/Seita.3G183600/Seita.3G194700/Seita.3G246700/Seita.4G085900/Seita.4G091000/Seita.5G056000/Seita.5G352700/Seita.6G228300/Seita.7G134400/Seita.7G144300/Seita.7G163500/Seita.7G307400/Seita.8G007000/Seita.8G146100/Seita.9G079700/Seita.9G112500/Seita.9G225400/Seita.9G319400/Seita.9G491000	26
greenyellow	BP	GO:0042023	DNA endoreduplication	9/181	45/9983	8.76664e-08	2.26143e-06	1.81548e-06	Seita.1G214700/Seita.1G314900/Seita.4G276600/Seita.5G008900/Seita.5G387100/Seita.6G228300/Seita.7G134400/Seita.7G304300/Seita.8G011000	9
greenyellow	BP	GO:0006310	DNA recombination	14/181	134/9983	1.28651e-07	3.25229e-06	2.61093e-06	Seita.1G329800/Seita.1G376600/Seita.3G183600/Seita.5G114900/Seita.5G413200/Seita.7G138000/Seita.7G154600/Seita.7G163500/Seita.7G307400/Seita.8G007000/Seita.8G229300/Seita.9G120500/Seita.9G319400/Seita.9G491000	14
greenyellow	BP	GO:0007062	sister chromatid cohesion	8/181	35/9983	1.54968e-07	3.84077e-06	3.08336e-06	Seita.1G052600/Seita.2G326500/Seita.3G151900/Seita.3G217300/Seita.5G117500/Seita.6G101100/Seita.7G154600/Seita.9G491000	8
greenyellow	BP	GO:0045132	meiotic chromosome segregation	10/181	64/9983	1.94345e-07	4.72409e-06	3.79249e-06	Seita.1G052600/Seita.2G326500/Seita.3G198000/Seita.5G114900/Seita.6G228300/Seita.7G138000/Seita.7G154600/Seita.9G120500/Seita.9G233200/Seita.9G258800	10
greenyellow	BP	GO:0051301	cell division	19/181	258/9983	2.02985e-07	4.841e-06	3.88635e-06	Seita.1G170500/Seita.2G161300/Seita.2G228600/Seita.2G391700/Seita.2G406300/Seita.3G115400/Seita.3G198000/Seita.3G246700/Seita.4G085900/Seita.5G008900/Seita.5G056000/Seita.5G114900/Seita.5G179700/Seita.5G274500/Seita.5G316800/Seita.6G228300/Seita.7G058500/Seita.7G147500/Seita.9G284500	19
greenyellow	BP	GO:0033043	regulation of organelle organization	19/181	260/9983	2.28998e-07	5.36026e-06	4.30321e-06	Seita.1G052600/Seita.1G214700/Seita.2G023300/Seita.2G326500/Seita.3G083100/Seita.3G115400/Seita.3G183600/Seita.4G085900/Seita.4G091000/Seita.6G228300/Seita.7G134400/Seita.7G144300/Seita.7G163500/Seita.7G307400/Seita.8G007000/Seita.8G146100/Seita.9G112500/Seita.9G225400/Seita.9G491000	19
greenyellow	BP	GO:0044839	cell cycle G2/M phase transition	7/181	26/9983	2.81975e-07	6.48029e-06	5.20237e-06	Seita.4G049800/Seita.4G276600/Seita.5G413200/Seita.7G304300/Seita.8G011000/Seita.9G128400/Seita.9G319400	7
greenyellow	BP	GO:0007088	regulation of mitotic nuclear division	8/181	38/9983	3.07379e-07	6.93799e-06	5.56981e-06	Seita.1G052600/Seita.1G214700/Seita.2G326500/Seita.3G083100/Seita.7G134400/Seita.7G144300/Seita.8G146100/Seita.9G491000	8
greenyellow	BP	GO:0007140	male meiotic nuclear division	7/181	27/9983	3.74875e-07	8.31301e-06	6.67367e-06	Seita.3G318600/Seita.4G085900/Seita.5G005800/Seita.5G114900/Seita.7G058500/Seita.9G069600/Seita.J002300	7
greenyellow	BP	GO:0033044	regulation of chromosome organization	13/181	125/9983	3.88084e-07	8.45756e-06	6.78971e-06	Seita.1G052600/Seita.2G023300/Seita.2G326500/Seita.3G083100/Seita.3G115400/Seita.3G183600/Seita.7G144300/Seita.7G163500/Seita.7G307400/Seita.8G007000/Seita.8G146100/Seita.9G112500/Seita.9G491000	13
greenyellow	BP	GO:0051783	regulation of nuclear division	9/181	54/9983	4.57207e-07	9.63183e-06	7.73242e-06	Seita.1G052600/Seita.1G214700/Seita.2G326500/Seita.3G083100/Seita.6G228300/Seita.7G134400/Seita.7G144300/Seita.8G146100/Seita.9G491000	9
greenyellow	BP	GO:2001251	negative regulation of chromosome organization	9/181	54/9983	4.57207e-07	9.63183e-06	7.73242e-06	Seita.1G052600/Seita.2G023300/Seita.2G326500/Seita.3G083100/Seita.3G183600/Seita.7G144300/Seita.7G163500/Seita.9G112500/Seita.9G491000	9
greenyellow	BP	GO:0010389	regulation of G2/M transition of mitotic cell cycle	6/181	18/9983	5.0655e-07	1.04964e-05	8.42647e-06	Seita.4G049800/Seita.4G276600/Seita.5G413200/Seita.7G304300/Seita.8G011000/Seita.9G319400	6
greenyellow	BP	GO:0000910	cytokinesis	12/181	115/9983	1.06427e-06	2.16974e-05	1.74187e-05	Seita.2G391700/Seita.2G406300/Seita.4G085900/Seita.5G008900/Seita.5G056000/Seita.5G114900/Seita.5G179700/Seita.5G274500/Seita.5G316800/Seita.7G058500/Seita.7G147500/Seita.9G284500	12
greenyellow	BP	GO:0006342	chromatin silencing	10/181	78/9983	1.2966e-06	2.60142e-05	2.08842e-05	Seita.1G329800/Seita.2G023300/Seita.2G287100/Seita.3G063000/Seita.3G115400/Seita.5G370600/Seita.7G307400/Seita.8G007000/Seita.9G112500/Seita.9G450000	10
greenyellow	BP	GO:0010332	response to gamma radiation	6/181	21/9983	1.4151e-06	2.79482e-05	2.24367e-05	Seita.1G329800/Seita.3G183600/Seita.3G194700/Seita.5G114900/Seita.5G352700/Seita.7G163500	6
greenyellow	BP	GO:0008283	cell proliferation	14/181	164/9983	1.54737e-06	3.00903e-05	2.41564e-05	Seita.1G052200/Seita.3G183600/Seita.4G049800/Seita.4G276600/Seita.5G008900/Seita.5G114900/Seita.5G413200/Seita.7G163500/Seita.7G304300/Seita.8G011000/Seita.8G121500/Seita.9G090900/Seita.9G177700/Seita.9G319400	14
greenyellow	BP	GO:0002495	antigen processing and presentation of peptide antigen via MHC class II	5/181	13/9983	2.1209e-06	3.94237e-05	3.16493e-05	Seita.1G052200/Seita.3G151900/Seita.8G146100/Seita.9G090900/Seita.9G177700	5
greenyellow	BP	GO:0002504	antigen processing and presentation of peptide or polysaccharide antigen via MHC class II	5/181	13/9983	2.1209e-06	3.94237e-05	3.16493e-05	Seita.1G052200/Seita.3G151900/Seita.8G146100/Seita.9G090900/Seita.9G177700	5
greenyellow	BP	GO:1902969	mitotic DNA replication	5/181	13/9983	2.1209e-06	3.94237e-05	3.16493e-05	Seita.1G376600/Seita.5G114900/Seita.7G307400/Seita.8G007000/Seita.9G491000	5
greenyellow	BP	GO:0070192	chromosome organization involved in meiotic cell cycle	8/181	49/9983	2.39096e-06	4.37996e-05	3.51622e-05	Seita.1G052600/Seita.2G326500/Seita.6G228300/Seita.7G138000/Seita.7G154600/Seita.9G120500/Seita.9G233200/Seita.9G258800	8
greenyellow	BP	GO:0000086	G2/M transition of mitotic cell cycle	6/181	23/9983	2.55422e-06	4.6122e-05	3.70266e-05	Seita.4G049800/Seita.4G276600/Seita.5G413200/Seita.7G304300/Seita.8G011000/Seita.9G319400	6
greenyellow	BP	GO:0045814	negative regulation of gene expression, epigenetic	10/181	85/9983	2.88977e-06	5.14461e-05	4.13008e-05	Seita.1G329800/Seita.2G023300/Seita.2G287100/Seita.3G063000/Seita.3G115400/Seita.5G370600/Seita.7G307400/Seita.8G007000/Seita.9G112500/Seita.9G450000	10
greenyellow	BP	GO:0006325	chromatin organization	19/181	313/9983	3.78869e-06	6.65126e-05	5.33962e-05	Seita.1G329800/Seita.2G023300/Seita.2G287100/Seita.2G391700/Seita.3G063000/Seita.3G115400/Seita.3G183600/Seita.3G198000/Seita.3G227400/Seita.4G049800/Seita.4G066200/Seita.5G114900/Seita.5G370600/Seita.5G413200/Seita.7G163500/Seita.7G307400/Seita.8G007000/Seita.9G112500/Seita.9G450000	19
greenyellow	BP	GO:0019882	antigen processing and presentation	5/181	15/9983	4.80476e-06	8.20706e-05	6.58861e-05	Seita.1G052200/Seita.3G151900/Seita.8G146100/Seita.9G090900/Seita.9G177700	5
greenyellow	BP	GO:0048002	antigen processing and presentation of peptide antigen	5/181	15/9983	4.80476e-06	8.20706e-05	6.58861e-05	Seita.1G052200/Seita.3G151900/Seita.8G146100/Seita.9G090900/Seita.9G177700	5
greenyellow	BP	GO:0033047	regulation of mitotic sister chromatid segregation	6/181	26/9983	5.5677e-06	9.38344e-05	7.53301e-05	Seita.1G052600/Seita.2G326500/Seita.3G083100/Seita.7G144300/Seita.8G146100/Seita.9G491000	6
greenyellow	BP	GO:0000075	cell cycle checkpoint	8/181	55/9983	5.88349e-06	9.78517e-05	7.85552e-05	Seita.1G052600/Seita.1G095100/Seita.2G326500/Seita.3G083100/Seita.7G144300/Seita.7G307400/Seita.8G007000/Seita.9G128400	8
greenyellow	BP	GO:0000226	microtubule cytoskeleton organization	11/181	116/9983	7.73903e-06	0.000127041	0.000101988	Seita.2G161300/Seita.2G391700/Seita.5G056000/Seita.5G114900/Seita.5G179700/Seita.5G218400/Seita.5G274500/Seita.7G058500/Seita.8G146100/Seita.9G284500/Seita.J002300	11
greenyellow	BP	GO:0010639	negative regulation of organelle organization	10/181	96/9983	8.77044e-06	0.000141444	0.000113551	Seita.1G052600/Seita.2G023300/Seita.2G326500/Seita.3G083100/Seita.3G183600/Seita.4G085900/Seita.7G144300/Seita.7G163500/Seita.9G112500/Seita.9G491000	10
greenyellow	BP	GO:0010103	stomatal complex morphogenesis	6/181	28/9983	8.84023e-06	0.000141444	0.000113551	Seita.1G213900/Seita.3G246700/Seita.6G228300/Seita.7G304300/Seita.8G011000/Seita.9G079700	6
greenyellow	BP	GO:0033048	negative regulation of mitotic sister chromatid segregation	5/181	18/9983	1.31153e-05	0.000207221	0.000166357	Seita.1G052600/Seita.2G326500/Seita.3G083100/Seita.7G144300/Seita.9G491000	5
greenyellow	BP	GO:0033045	regulation of sister chromatid segregation	6/181	31/9983	1.65135e-05	0.000257692	0.000206875	Seita.1G052600/Seita.2G326500/Seita.3G083100/Seita.7G144300/Seita.8G146100/Seita.9G491000	6
greenyellow	BP	GO:0007349	cellularization	4/181	10/9983	2.0159e-05	0.000310743	0.000249464	Seita.2G161300/Seita.4G085900/Seita.5G056000/Seita.5G179700	4
greenyellow	BP	GO:0061640	cytoskeleton-dependent cytokinesis	10/181	106/9983	2.11835e-05	0.000322602	0.000258984	Seita.2G406300/Seita.4G085900/Seita.5G056000/Seita.5G114900/Seita.5G179700/Seita.5G274500/Seita.5G316800/Seita.7G058500/Seita.7G147500/Seita.9G284500	10
greenyellow	BP	GO:0065004	protein-DNA complex assembly	9/181	85/9983	2.18495e-05	0.000328783	0.000263946	Seita.3G115400/Seita.3G198000/Seita.3G227400/Seita.4G066200/Seita.5G413200/Seita.7G163500/Seita.7G307400/Seita.8G007000/Seita.8G146100	9
greenyellow	BP	GO:0033046	negative regulation of sister chromatid segregation	5/181	20/9983	2.30431e-05	0.000334787	0.000268766	Seita.1G052600/Seita.2G326500/Seita.3G083100/Seita.7G144300/Seita.9G491000	5
greenyellow	BP	GO:0051310	metaphase plate congression	5/181	20/9983	2.30431e-05	0.000334787	0.000268766	Seita.3G083100/Seita.3G151900/Seita.3G217300/Seita.5G114900/Seita.8G146100	5
greenyellow	BP	GO:0051985	negative regulation of chromosome segregation	5/181	20/9983	2.30431e-05	0.000334787	0.000268766	Seita.1G052600/Seita.2G326500/Seita.3G083100/Seita.7G144300/Seita.9G491000	5
greenyellow	BP	GO:0045787	positive regulation of cell cycle	8/181	66/9983	2.34193e-05	0.000336386	0.00027005	Seita.3G183600/Seita.5G114900/Seita.5G413200/Seita.7G163500/Seita.7G258800/Seita.7G307400/Seita.8G007000/Seita.9G319400	8
greenyellow	BP	GO:0048229	gametophyte development	19/181	356/9983	2.37524e-05	0.000337337	0.000270814	Seita.1G214700/Seita.2G263300/Seita.2G400500/Seita.3G178000/Seita.3G318600/Seita.3G379200/Seita.4G085900/Seita.5G005800/Seita.5G056000/Seita.5G179700/Seita.5G318600/Seita.5G413200/Seita.6G001400/Seita.6G101100/Seita.6G228300/Seita.7G058500/Seita.7G134400/Seita.7G154600/Seita.9G069600	19
greenyellow	BP	GO:2000113	negative regulation of cellular macromolecule biosynthetic process	18/181	325/9983	2.40938e-05	0.000338384	0.000271654	Seita.1G314900/Seita.1G329800/Seita.2G023300/Seita.2G287100/Seita.3G063000/Seita.3G115400/Seita.3G178000/Seita.4G091000/Seita.5G008900/Seita.5G114900/Seita.5G318600/Seita.5G370600/Seita.5G391700/Seita.7G163500/Seita.7G307400/Seita.8G007000/Seita.9G112500/Seita.9G450000	18
greenyellow	BP	GO:0007010	cytoskeleton organization	15/181	237/9983	2.56637e-05	0.000352682	0.000283132	Seita.2G161300/Seita.2G391700/Seita.4G085900/Seita.4G091000/Seita.5G056000/Seita.5G114900/Seita.5G179700/Seita.5G218400/Seita.5G274500/Seita.7G058500/Seita.7G147500/Seita.8G146100/Seita.9G225400/Seita.9G284500/Seita.J002300	15
greenyellow	BP	GO:0031327	negative regulation of cellular biosynthetic process	19/181	358/9983	2.56699e-05	0.000352682	0.000283132	Seita.1G314900/Seita.1G329800/Seita.2G023300/Seita.2G287100/Seita.3G063000/Seita.3G115400/Seita.3G178000/Seita.3G183600/Seita.4G091000/Seita.5G008900/Seita.5G114900/Seita.5G318600/Seita.5G370600/Seita.5G391700/Seita.7G163500/Seita.7G307400/Seita.8G007000/Seita.9G112500/Seita.9G450000	19
greenyellow	BP	GO:0051983	regulation of chromosome segregation	6/181	34/9983	2.88321e-05	0.000391868	0.000314591	Seita.1G052600/Seita.2G326500/Seita.3G083100/Seita.7G144300/Seita.8G146100/Seita.9G491000	6
greenyellow	BP	GO:0010374	stomatal complex development	7/181	50/9983	2.96585e-05	0.000398812	0.000320165	Seita.1G213900/Seita.3G246700/Seita.4G276600/Seita.6G228300/Seita.7G304300/Seita.8G011000/Seita.9G079700	7
greenyellow	BP	GO:0009890	negative regulation of biosynthetic process	19/181	367/9983	3.61269e-05	0.000461887	0.000370802	Seita.1G314900/Seita.1G329800/Seita.2G023300/Seita.2G287100/Seita.3G063000/Seita.3G115400/Seita.3G178000/Seita.3G183600/Seita.4G091000/Seita.5G008900/Seita.5G114900/Seita.5G318600/Seita.5G370600/Seita.5G391700/Seita.7G163500/Seita.7G307400/Seita.8G007000/Seita.9G112500/Seita.9G450000	19
greenyellow	BP	GO:0045934	negative regulation of nucleobase-containing compound metabolic process	18/181	336/9983	3.74601e-05	0.000461887	0.000370802	Seita.1G314900/Seita.1G329800/Seita.2G023300/Seita.2G287100/Seita.3G063000/Seita.3G115400/Seita.3G178000/Seita.4G091000/Seita.5G008900/Seita.5G114900/Seita.5G318600/Seita.5G370600/Seita.5G391700/Seita.7G163500/Seita.7G307400/Seita.8G007000/Seita.9G112500/Seita.9G450000	18
greenyellow	BP	GO:0007091	metaphase/anaphase transition of mitotic cell cycle	5/181	22/9983	3.80034e-05	0.000461887	0.000370802	Seita.1G052600/Seita.2G326500/Seita.3G083100/Seita.7G144300/Seita.8G146100	5
greenyellow	BP	GO:0010965	regulation of mitotic sister chromatid separation	5/181	22/9983	3.80034e-05	0.000461887	0.000370802	Seita.1G052600/Seita.2G326500/Seita.3G083100/Seita.7G144300/Seita.8G146100	5
greenyellow	BP	GO:0030071	regulation of mitotic metaphase/anaphase transition	5/181	22/9983	3.80034e-05	0.000461887	0.000370802	Seita.1G052600/Seita.2G326500/Seita.3G083100/Seita.7G144300/Seita.8G146100	5
greenyellow	BP	GO:0032875	regulation of DNA endoreduplication	5/181	22/9983	3.80034e-05	0.000461887	0.000370802	Seita.1G314900/Seita.5G008900/Seita.6G228300/Seita.7G304300/Seita.8G011000	5
greenyellow	BP	GO:0044784	metaphase/anaphase transition of cell cycle	5/181	22/9983	3.80034e-05	0.000461887	0.000370802	Seita.1G052600/Seita.2G326500/Seita.3G083100/Seita.7G144300/Seita.8G146100	5
greenyellow	BP	GO:0051303	establishment of chromosome localization	5/181	22/9983	3.80034e-05	0.000461887	0.000370802	Seita.3G083100/Seita.3G151900/Seita.3G217300/Seita.5G114900/Seita.8G146100	5
greenyellow	BP	GO:1902099	regulation of metaphase/anaphase transition of cell cycle	5/181	22/9983	3.80034e-05	0.000461887	0.000370802	Seita.1G052600/Seita.2G326500/Seita.3G083100/Seita.7G144300/Seita.8G146100	5
greenyellow	BP	GO:1905818	regulation of chromosome separation	5/181	22/9983	3.80034e-05	0.000461887	0.000370802	Seita.1G052600/Seita.2G326500/Seita.3G083100/Seita.7G144300/Seita.8G146100	5
greenyellow	BP	GO:0045930	negative regulation of mitotic cell cycle	7/181	53/9983	4.37212e-05	0.00052632	0.000422529	Seita.1G052600/Seita.2G326500/Seita.3G083100/Seita.7G144300/Seita.7G307400/Seita.8G007000/Seita.9G491000	7
greenyellow	BP	GO:0051306	mitotic sister chromatid separation	5/181	23/9983	4.78504e-05	0.000570593	0.000458071	Seita.1G052600/Seita.2G326500/Seita.3G083100/Seita.7G144300/Seita.8G146100	5
greenyellow	BP	GO:0051172	negative regulation of nitrogen compound metabolic process	22/181	476/9983	4.84368e-05	0.000572188	0.000459351	Seita.1G214700/Seita.1G314900/Seita.1G329800/Seita.2G023300/Seita.2G287100/Seita.3G063000/Seita.3G115400/Seita.3G178000/Seita.3G183600/Seita.4G091000/Seita.5G008900/Seita.5G114900/Seita.5G318600/Seita.5G370600/Seita.5G391700/Seita.7G134400/Seita.7G163500/Seita.7G307400/Seita.8G007000/Seita.9G112500/Seita.9G450000/Seita.9G496000	22
greenyellow	BP	GO:0010212	response to ionizing radiation	7/181	54/9983	4.94724e-05	0.000579011	0.000464829	Seita.1G329800/Seita.3G183600/Seita.3G194700/Seita.4G216500/Seita.5G114900/Seita.5G352700/Seita.7G163500	7
greenyellow	BP	GO:0019953	sexual reproduction	12/181	168/9983	5.29183e-05	0.000607901	0.000488022	Seita.3G198000/Seita.3G318600/Seita.3G379200/Seita.4G085900/Seita.4G216500/Seita.5G005800/Seita.5G056000/Seita.5G114900/Seita.6G228300/Seita.7G058500/Seita.9G069600/Seita.J002300	12
greenyellow	BP	GO:0010558	negative regulation of macromolecule biosynthetic process	18/181	345/9983	5.29396e-05	0.000607901	0.000488022	Seita.1G314900/Seita.1G329800/Seita.2G023300/Seita.2G287100/Seita.3G063000/Seita.3G115400/Seita.3G178000/Seita.4G091000/Seita.5G008900/Seita.5G114900/Seita.5G318600/Seita.5G370600/Seita.5G391700/Seita.7G163500/Seita.7G307400/Seita.8G007000/Seita.9G112500/Seita.9G450000	18
greenyellow	BP	GO:0007276	gamete generation	9/181	95/9983	5.33837e-05	0.000607901	0.000488022	Seita.3G318600/Seita.3G379200/Seita.4G085900/Seita.4G216500/Seita.5G005800/Seita.5G114900/Seita.7G058500/Seita.9G069600/Seita.J002300	9
greenyellow	BP	GO:0045892	negative regulation of transcription, DNA-templated	15/181	253/9983	5.46823e-05	0.000617129	0.00049543	Seita.1G329800/Seita.2G023300/Seita.2G287100/Seita.3G063000/Seita.3G115400/Seita.3G178000/Seita.5G008900/Seita.5G318600/Seita.5G370600/Seita.5G391700/Seita.7G163500/Seita.7G307400/Seita.8G007000/Seita.9G112500/Seita.9G450000	15
greenyellow	BP	GO:0051129	negative regulation of cellular component organization	10/181	119/9983	5.77574e-05	0.000646065	0.00051866	Seita.1G052600/Seita.2G023300/Seita.2G326500/Seita.3G083100/Seita.3G183600/Seita.4G085900/Seita.7G144300/Seita.7G163500/Seita.9G112500/Seita.9G491000	10
greenyellow	BP	GO:0045839	negative regulation of mitotic nuclear division	5/181	24/9983	5.95598e-05	0.000660382	0.000530153	Seita.1G052600/Seita.2G326500/Seita.3G083100/Seita.7G144300/Seita.9G491000	5
greenyellow	BP	GO:0035067	negative regulation of histone acetylation	4/181	13/9983	6.57664e-05	0.000699993	0.000561953	Seita.2G023300/Seita.3G183600/Seita.7G163500/Seita.9G112500	4
greenyellow	BP	GO:0045144	meiotic sister chromatid segregation	4/181	13/9983	6.57664e-05	0.000699993	0.000561953	Seita.1G052600/Seita.2G326500/Seita.7G154600/Seita.9G233200	4
greenyellow	BP	GO:1901984	negative regulation of protein acetylation	4/181	13/9983	6.57664e-05	0.000699993	0.000561953	Seita.2G023300/Seita.3G183600/Seita.7G163500/Seita.9G112500	4
greenyellow	BP	GO:2000757	negative regulation of peptidyl-lysine acetylation	4/181	13/9983	6.57664e-05	0.000699993	0.000561953	Seita.2G023300/Seita.3G183600/Seita.7G163500/Seita.9G112500	4
greenyellow	BP	GO:0007127	meiosis I	8/181	76/9983	6.59013e-05	0.000699993	0.000561953	Seita.1G214700/Seita.1G329800/Seita.5G114900/Seita.6G228300/Seita.7G134400/Seita.7G138000/Seita.9G120500/Seita.9G258800	8
greenyellow	BP	GO:0000281	mitotic cytokinesis	9/181	99/9983	7.39127e-05	0.000778547	0.000625016	Seita.2G406300/Seita.4G085900/Seita.5G056000/Seita.5G114900/Seita.5G179700/Seita.5G274500/Seita.5G316800/Seita.7G147500/Seita.9G284500	9
greenyellow	BP	GO:0007093	mitotic cell cycle checkpoint	6/181	40/9983	7.51894e-05	0.00078545	0.000630558	Seita.1G052600/Seita.2G326500/Seita.3G083100/Seita.7G144300/Seita.7G307400/Seita.8G007000	6
greenyellow	BP	GO:0061982	meiosis I cell cycle process	8/181	78/9983	7.94611e-05	0.000821829	0.000659762	Seita.1G214700/Seita.1G329800/Seita.5G114900/Seita.6G228300/Seita.7G134400/Seita.7G138000/Seita.9G120500/Seita.9G258800	8
greenyellow	BP	GO:0071824	protein-DNA complex subunit organization	9/181	100/9983	7.99722e-05	0.000821829	0.000659762	Seita.3G115400/Seita.3G198000/Seita.3G227400/Seita.4G066200/Seita.5G413200/Seita.7G163500/Seita.7G307400/Seita.8G007000/Seita.8G146100	9
greenyellow	BP	GO:0048232	male gamete generation	8/181	79/9983	8.70636e-05	0.000887487	0.000712473	Seita.3G318600/Seita.3G379200/Seita.4G085900/Seita.5G005800/Seita.5G114900/Seita.7G058500/Seita.9G069600/Seita.J002300	8
greenyellow	BP	GO:0000911	cytokinesis by cell plate formation	7/181	59/9983	8.83045e-05	0.000892935	0.000716846	Seita.2G406300/Seita.4G085900/Seita.5G056000/Seita.5G179700/Seita.5G274500/Seita.5G316800/Seita.9G284500	7
greenyellow	BP	GO:0031324	negative regulation of cellular metabolic process	22/181	499/9983	9.7373e-05	0.000976822	0.000784191	Seita.1G214700/Seita.1G314900/Seita.1G329800/Seita.2G023300/Seita.2G287100/Seita.3G063000/Seita.3G115400/Seita.3G178000/Seita.3G183600/Seita.4G091000/Seita.5G008900/Seita.5G114900/Seita.5G318600/Seita.5G370600/Seita.5G391700/Seita.7G134400/Seita.7G163500/Seita.7G307400/Seita.8G007000/Seita.9G112500/Seita.9G450000/Seita.9G496000	22
greenyellow	BP	GO:0009553	embryo sac development	10/181	127/9983	0.000100204	0.000997304	0.000800634	Seita.1G214700/Seita.3G178000/Seita.4G085900/Seita.5G179700/Seita.5G318600/Seita.6G001400/Seita.6G101100/Seita.6G228300/Seita.7G134400/Seita.7G154600	10
greenyellow	BP	GO:0044703	multi-organism reproductive process	12/181	180/9983	0.000103082	0.00101793	0.000817193	Seita.3G198000/Seita.3G318600/Seita.3G379200/Seita.4G085900/Seita.4G216500/Seita.5G005800/Seita.5G056000/Seita.5G114900/Seita.6G228300/Seita.7G058500/Seita.9G069600/Seita.J002300	12
greenyellow	BP	GO:1902679	negative regulation of RNA biosynthetic process	15/181	268/9983	0.000104878	0.00101974	0.000818642	Seita.1G329800/Seita.2G023300/Seita.2G287100/Seita.3G063000/Seita.3G115400/Seita.3G178000/Seita.5G008900/Seita.5G318600/Seita.5G370600/Seita.5G391700/Seita.7G163500/Seita.7G307400/Seita.8G007000/Seita.9G112500/Seita.9G450000	15
greenyellow	BP	GO:1903507	negative regulation of nucleic acid-templated transcription	15/181	268/9983	0.000104878	0.00101974	0.000818642	Seita.1G329800/Seita.2G023300/Seita.2G287100/Seita.3G063000/Seita.3G115400/Seita.3G178000/Seita.5G008900/Seita.5G318600/Seita.5G370600/Seita.5G391700/Seita.7G163500/Seita.7G307400/Seita.8G007000/Seita.9G112500/Seita.9G450000	15
greenyellow	BP	GO:0051784	negative regulation of nuclear division	5/181	27/9983	0.000108244	0.00104443	0.000838465	Seita.1G052600/Seita.2G326500/Seita.3G083100/Seita.7G144300/Seita.9G491000	5
greenyellow	BP	GO:0051253	negative regulation of RNA metabolic process	16/181	302/9983	0.000117179	0.00111776	0.000897334	Seita.1G329800/Seita.2G023300/Seita.2G287100/Seita.3G063000/Seita.3G115400/Seita.3G178000/Seita.4G091000/Seita.5G008900/Seita.5G318600/Seita.5G370600/Seita.5G391700/Seita.7G163500/Seita.7G307400/Seita.8G007000/Seita.9G112500/Seita.9G450000	16
greenyellow	BP	GO:0032506	cytokinetic process	7/181	62/9983	0.000121612	0.00111776	0.000897334	Seita.2G406300/Seita.4G085900/Seita.5G056000/Seita.5G179700/Seita.5G274500/Seita.5G316800/Seita.9G284500	7
greenyellow	BP	GO:1902410	mitotic cytokinetic process	7/181	62/9983	0.000121612	0.00111776	0.000897334	Seita.2G406300/Seita.4G085900/Seita.5G056000/Seita.5G179700/Seita.5G274500/Seita.5G316800/Seita.9G284500	7
greenyellow	BP	GO:0007094	mitotic spindle assembly checkpoint	4/181	15/9983	0.000122034	0.00111776	0.000897334	Seita.1G052600/Seita.2G326500/Seita.3G083100/Seita.7G144300	4
greenyellow	BP	GO:0031577	spindle checkpoint	4/181	15/9983	0.000122034	0.00111776	0.000897334	Seita.1G052600/Seita.2G326500/Seita.3G083100/Seita.7G144300	4
greenyellow	BP	GO:0071173	spindle assembly checkpoint	4/181	15/9983	0.000122034	0.00111776	0.000897334	Seita.1G052600/Seita.2G326500/Seita.3G083100/Seita.7G144300	4
greenyellow	BP	GO:0071174	mitotic spindle checkpoint	4/181	15/9983	0.000122034	0.00111776	0.000897334	Seita.1G052600/Seita.2G326500/Seita.3G083100/Seita.7G144300	4
greenyellow	BP	GO:0050000	chromosome localization	5/181	28/9983	0.000129853	0.00116735	0.000937147	Seita.3G083100/Seita.3G151900/Seita.3G217300/Seita.5G114900/Seita.8G146100	5
greenyellow	BP	GO:0051304	chromosome separation	6/181	44/9983	0.000130219	0.00116735	0.000937147	Seita.1G052600/Seita.2G326500/Seita.3G083100/Seita.3G198000/Seita.7G144300/Seita.8G146100	6
greenyellow	BP	GO:2001252	positive regulation of chromosome organization	6/181	44/9983	0.000130219	0.00116735	0.000937147	Seita.2G023300/Seita.3G115400/Seita.3G183600/Seita.7G163500/Seita.9G112500/Seita.9G491000	6
greenyellow	BP	GO:1905269	positive regulation of chromatin organization	5/181	29/9983	0.000154618	0.00137632	0.00110491	Seita.2G023300/Seita.3G115400/Seita.3G183600/Seita.7G163500/Seita.9G112500	5
greenyellow	BP	GO:0042770	signal transduction in response to DNA damage	4/181	16/9983	0.000160416	0.0014081	0.00113042	Seita.5G114900/Seita.7G307400/Seita.8G007000/Seita.9G128400	4
greenyellow	BP	GO:1902806	regulation of cell cycle G1/S phase transition	4/181	16/9983	0.000160416	0.0014081	0.00113042	Seita.7G304300/Seita.7G307400/Seita.8G007000/Seita.8G011000	4
greenyellow	BP	GO:0006890	retrograde vesicle-mediated transport, Golgi to ER	5/181	30/9983	0.000182838	0.00159385	0.00127954	Seita.1G052200/Seita.3G151900/Seita.8G146100/Seita.9G090900/Seita.9G177700	5
greenyellow	BP	GO:0022412	cellular process involved in reproduction in multicellular organism	8/181	89/9983	0.000202083	0.00170861	0.00137167	Seita.3G318600/Seita.3G379200/Seita.4G085900/Seita.5G005800/Seita.5G114900/Seita.7G058500/Seita.9G069600/Seita.J002300	8
greenyellow	BP	GO:0008156	negative regulation of DNA replication	4/181	17/9983	0.000206817	0.00170861	0.00137167	Seita.1G314900/Seita.5G114900/Seita.7G307400/Seita.8G007000	4
greenyellow	BP	GO:0031057	negative regulation of histone modification	4/181	17/9983	0.000206817	0.00170861	0.00137167	Seita.2G023300/Seita.3G183600/Seita.7G163500/Seita.9G112500	4
greenyellow	BP	GO:0045841	negative regulation of mitotic metaphase/anaphase transition	4/181	17/9983	0.000206817	0.00170861	0.00137167	Seita.1G052600/Seita.2G326500/Seita.3G083100/Seita.7G144300	4
greenyellow	BP	GO:1902100	negative regulation of metaphase/anaphase transition of cell cycle	4/181	17/9983	0.000206817	0.00170861	0.00137167	Seita.1G052600/Seita.2G326500/Seita.3G083100/Seita.7G144300	4
greenyellow	BP	GO:1905819	negative regulation of chromosome separation	4/181	17/9983	0.000206817	0.00170861	0.00137167	Seita.1G052600/Seita.2G326500/Seita.3G083100/Seita.7G144300	4
greenyellow	BP	GO:2000104	negative regulation of DNA-dependent DNA replication	4/181	17/9983	0.000206817	0.00170861	0.00137167	Seita.1G314900/Seita.5G114900/Seita.7G307400/Seita.8G007000	4
greenyellow	BP	GO:2000816	negative regulation of mitotic sister chromatid separation	4/181	17/9983	0.000206817	0.00170861	0.00137167	Seita.1G052600/Seita.2G326500/Seita.3G083100/Seita.7G144300	4
greenyellow	BP	GO:0051656	establishment of organelle localization	8/181	90/9983	0.000218415	0.00178869	0.00143596	Seita.1G360100/Seita.3G083100/Seita.3G151900/Seita.3G217300/Seita.5G114900/Seita.8G146100/Seita.9G152900/Seita.9G411600	8
greenyellow	BP	GO:0042127	regulation of cell proliferation	9/181	114/9983	0.000219341	0.00178869	0.00143596	Seita.3G183600/Seita.4G049800/Seita.5G008900/Seita.5G114900/Seita.7G163500/Seita.7G304300/Seita.8G011000/Seita.8G121500/Seita.9G319400	9
greenyellow	BP	GO:0010638	positive regulation of organelle organization	8/181	91/9983	0.000235815	0.0019107	0.00153391	Seita.2G023300/Seita.3G115400/Seita.3G183600/Seita.4G091000/Seita.7G163500/Seita.9G112500/Seita.9G225400/Seita.9G491000	8
greenyellow	BP	GO:0007080	mitotic metaphase plate congression	4/181	18/9983	0.00026216	0.00207107	0.00166265	Seita.3G083100/Seita.3G151900/Seita.3G217300/Seita.8G146100	4
greenyellow	BP	GO:0035065	regulation of histone acetylation	4/181	18/9983	0.00026216	0.00207107	0.00166265	Seita.2G023300/Seita.3G183600/Seita.7G163500/Seita.9G112500	4
greenyellow	BP	GO:1901983	regulation of protein acetylation	4/181	18/9983	0.00026216	0.00207107	0.00166265	Seita.2G023300/Seita.3G183600/Seita.7G163500/Seita.9G112500	4
greenyellow	BP	GO:2000756	regulation of peptidyl-lysine acetylation	4/181	18/9983	0.00026216	0.00207107	0.00166265	Seita.2G023300/Seita.3G183600/Seita.7G163500/Seita.9G112500	4
greenyellow	BP	GO:0006323	DNA packaging	6/181	51/9983	0.000299126	0.00234842	0.00188531	Seita.3G115400/Seita.3G192100/Seita.3G198000/Seita.3G227400/Seita.4G066200/Seita.5G413200	6
greenyellow	BP	GO:1902275	regulation of chromatin organization	7/181	72/9983	0.000312866	0.00244113	0.00195973	Seita.2G023300/Seita.3G115400/Seita.3G183600/Seita.7G163500/Seita.7G307400/Seita.8G007000/Seita.9G112500	7
greenyellow	BP	GO:1901988	negative regulation of cell cycle phase transition	5/181	35/9983	0.000387066	0.00300154	0.00240963	Seita.1G052600/Seita.2G326500/Seita.3G083100/Seita.7G144300/Seita.9G128400	5
greenyellow	BP	GO:0009556	microsporogenesis	4/181	21/9983	0.000491405	0.00376446	0.0030221	Seita.3G318600/Seita.5G005800/Seita.5G056000/Seita.9G069600	4
greenyellow	BP	GO:0045931	positive regulation of mitotic cell cycle	4/181	21/9983	0.000491405	0.00376446	0.0030221	Seita.5G114900/Seita.7G307400/Seita.8G007000/Seita.9G319400	4
greenyellow	BP	GO:0090068	positive regulation of cell cycle process	5/181	37/9983	0.000504729	0.00384324	0.00308534	Seita.3G183600/Seita.7G163500/Seita.7G307400/Seita.8G007000/Seita.9G319400	5
greenyellow	BP	GO:0031400	negative regulation of protein modification process	6/181	57/9983	0.000550971	0.00417022	0.00334785	Seita.1G214700/Seita.2G023300/Seita.3G183600/Seita.7G134400/Seita.7G163500/Seita.9G112500	6
greenyellow	BP	GO:0051130	positive regulation of cellular component organization	9/181	131/9983	0.000614983	0.00462701	0.00371456	Seita.1G081300/Seita.2G023300/Seita.3G115400/Seita.3G183600/Seita.4G091000/Seita.7G163500/Seita.9G112500/Seita.9G225400/Seita.9G491000	9
greenyellow	BP	GO:0072401	signal transduction involved in DNA integrity checkpoint	3/181	10/9983	0.000640464	0.00476204	0.00382295	Seita.7G307400/Seita.8G007000/Seita.9G128400	3
greenyellow	BP	GO:0072422	signal transduction involved in DNA damage checkpoint	3/181	10/9983	0.000640464	0.00476204	0.00382295	Seita.7G307400/Seita.8G007000/Seita.9G128400	3
greenyellow	BP	GO:0009561	megagametogenesis	6/181	59/9983	0.000663968	0.00488489	0.00392158	Seita.1G214700/Seita.4G085900/Seita.5G179700/Seita.6G001400/Seita.6G101100/Seita.7G134400	6
greenyellow	BP	GO:0090626	plant epidermis morphogenesis	8/181	106/9983	0.000664716	0.00488489	0.00392158	Seita.1G213900/Seita.1G214700/Seita.3G246700/Seita.6G228300/Seita.7G134400/Seita.7G304300/Seita.8G011000/Seita.9G079700	8
greenyellow	BP	GO:0007051	spindle organization	5/181	40/9983	0.000729199	0.00529717	0.00425256	Seita.2G391700/Seita.5G179700/Seita.8G146100/Seita.9G284500/Seita.J002300	5
greenyellow	BP	GO:0031497	chromatin assembly	5/181	40/9983	0.000729199	0.00529717	0.00425256	Seita.3G115400/Seita.3G198000/Seita.3G227400/Seita.4G066200/Seita.5G413200	5
greenyellow	BP	GO:1905268	negative regulation of chromatin organization	4/181	24/9983	0.000836191	0.00603969	0.00484865	Seita.2G023300/Seita.3G183600/Seita.7G163500/Seita.9G112500	4
greenyellow	BP	GO:0051177	meiotic sister chromatid cohesion	3/181	11/9983	0.000868926	0.00620521	0.00498153	Seita.1G052600/Seita.2G326500/Seita.7G154600	3
greenyellow	BP	GO:0071479	cellular response to ionizing radiation	3/181	11/9983	0.000868926	0.00620521	0.00498153	Seita.1G329800/Seita.3G183600/Seita.7G163500	3
greenyellow	BP	GO:0045143	homologous chromosome segregation	5/181	42/9983	0.000915549	0.00650142	0.00521933	Seita.5G114900/Seita.6G228300/Seita.7G138000/Seita.9G120500/Seita.9G258800	5
greenyellow	BP	GO:0016458	gene silencing	11/181	198/9983	0.000944298	0.00666811	0.00535315	Seita.1G329800/Seita.1G376600/Seita.2G023300/Seita.2G287100/Seita.3G063000/Seita.3G115400/Seita.5G370600/Seita.7G307400/Seita.8G007000/Seita.9G112500/Seita.9G450000	11
greenyellow	BP	GO:0051445	regulation of meiotic cell cycle	4/181	25/9983	0.000981491	0.00689225	0.00553309	Seita.1G214700/Seita.3G318600/Seita.5G005800/Seita.7G134400	4
greenyellow	BP	GO:0007050	cell cycle arrest	3/181	12/9983	0.00114317	0.00785652	0.0063072	Seita.1G095100/Seita.3G183600/Seita.7G163500	3
greenyellow	BP	GO:0072395	signal transduction involved in cell cycle checkpoint	3/181	12/9983	0.00114317	0.00785652	0.0063072	Seita.7G307400/Seita.8G007000/Seita.9G128400	3
greenyellow	BP	GO:0007052	mitotic spindle organization	4/181	26/9983	0.00114367	0.00785652	0.0063072	Seita.2G391700/Seita.5G179700/Seita.8G146100/Seita.9G284500	4
greenyellow	BP	GO:1902850	microtubule cytoskeleton organization involved in mitosis	4/181	26/9983	0.00114367	0.00785652	0.0063072	Seita.2G391700/Seita.5G179700/Seita.8G146100/Seita.9G284500	4
greenyellow	BP	GO:0048609	multicellular organismal reproductive process	10/181	173/9983	0.00118911	0.00812452	0.00652235	Seita.3G318600/Seita.3G379200/Seita.4G085900/Seita.4G216500/Seita.5G005800/Seita.5G114900/Seita.7G058500/Seita.7G154600/Seita.9G069600/Seita.J002300	10
greenyellow	BP	GO:0048646	anatomical structure formation involved in morphogenesis	13/181	270/9983	0.00125425	0.00852349	0.00684264	Seita.1G081300/Seita.2G161300/Seita.2G263300/Seita.4G085900/Seita.4G091000/Seita.4G276600/Seita.5G056000/Seita.5G179700/Seita.5G274500/Seita.7G029100/Seita.7G304300/Seita.8G011000/Seita.8G168400	13
greenyellow	BP	GO:0031058	positive regulation of histone modification	4/181	27/9983	0.00132374	0.00894767	0.00718317	Seita.2G023300/Seita.3G183600/Seita.7G163500/Seita.9G112500	4
greenyellow	BP	GO:0006333	chromatin assembly or disassembly	5/181	46/9983	0.00139163	0.0093565	0.00751138	Seita.3G115400/Seita.3G198000/Seita.3G227400/Seita.4G066200/Seita.5G413200	5
greenyellow	BP	GO:0040029	regulation of gene expression, epigenetic	11/181	209/9983	0.00146374	0.0097554	0.00783161	Seita.1G329800/Seita.2G023300/Seita.2G287100/Seita.3G063000/Seita.3G115400/Seita.5G370600/Seita.6G228300/Seita.7G307400/Seita.8G007000/Seita.9G112500/Seita.9G450000	11
greenyellow	BP	GO:0034508	centromere complex assembly	3/181	13/9983	0.0014664	0.0097554	0.00783161	Seita.3G115400/Seita.3G198000/Seita.8G146100	3
greenyellow	BP	GO:0048236	plant-type sporogenesis	4/181	28/9983	0.00152273	0.0100771	0.00808988	Seita.3G318600/Seita.5G005800/Seita.5G056000/Seita.9G069600	4
greenyellow	BP	GO:0006334	nucleosome assembly	4/181	29/9983	0.00174162	0.0114657	0.00920464	Seita.3G198000/Seita.3G227400/Seita.4G066200/Seita.5G413200	4
greenyellow	BP	GO:0010052	guard cell differentiation	3/181	14/9983	0.00184157	0.0119371	0.0095831	Seita.1G213900/Seita.6G228300/Seita.9G079700	3
greenyellow	BP	GO:0010440	stomatal lineage progression	3/181	14/9983	0.00184157	0.0119371	0.0095831	Seita.4G276600/Seita.7G304300/Seita.8G011000	3
greenyellow	BP	GO:0032465	regulation of cytokinesis	3/181	14/9983	0.00184157	0.0119371	0.0095831	Seita.2G391700/Seita.5G008900/Seita.5G114900	3
greenyellow	BP	GO:0051640	organelle localization	8/181	125/9983	0.00193836	0.0125004	0.0100353	Seita.1G360100/Seita.3G083100/Seita.3G151900/Seita.3G217300/Seita.5G114900/Seita.8G146100/Seita.9G152900/Seita.9G411600	8
greenyellow	BP	GO:0032504	multicellular organism reproduction	10/181	187/9983	0.00212637	0.0136433	0.0109528	Seita.3G318600/Seita.3G379200/Seita.4G085900/Seita.4G216500/Seita.5G005800/Seita.5G114900/Seita.7G058500/Seita.7G154600/Seita.9G069600/Seita.J002300	10
greenyellow	BP	GO:0006346	methylation-dependent chromatin silencing	3/181	15/9983	0.00227145	0.0145006	0.011641	Seita.2G023300/Seita.3G115400/Seita.9G112500	3
greenyellow	BP	GO:0048193	Golgi vesicle transport	7/181	102/9983	0.00248995	0.0158155	0.0126967	Seita.1G052200/Seita.3G151900/Seita.7G147500/Seita.8G146100/Seita.9G090900/Seita.9G177700/Seita.9G306200	7
greenyellow	BP	GO:0009934	regulation of meristem structural organization	3/181	16/9983	0.00275861	0.0174344	0.0139963	Seita.4G049800/Seita.5G413200/Seita.7G163500	3
greenyellow	BP	GO:0007129	synapsis	4/181	33/9983	0.00283623	0.0177475	0.0142477	Seita.6G228300/Seita.7G138000/Seita.9G120500/Seita.9G258800	4
greenyellow	BP	GO:1901991	negative regulation of mitotic cell cycle phase transition	4/181	33/9983	0.00283623	0.0177475	0.0142477	Seita.1G052600/Seita.2G326500/Seita.3G083100/Seita.7G144300	4
greenyellow	BP	GO:0009555	pollen development	12/181	264/9983	0.00309111	0.0192471	0.0154515	Seita.2G263300/Seita.2G400500/Seita.3G318600/Seita.3G379200/Seita.5G005800/Seita.5G056000/Seita.5G179700/Seita.5G413200/Seita.6G101100/Seita.6G228300/Seita.7G058500/Seita.9G069600	12
greenyellow	BP	GO:0031570	DNA integrity checkpoint	4/181	34/9983	0.00316951	0.0196385	0.0157658	Seita.1G095100/Seita.7G307400/Seita.8G007000/Seita.9G128400	4
greenyellow	BP	GO:0090698	post-embryonic plant morphogenesis	10/181	199/9983	0.00333861	0.0205854	0.0165259	Seita.1G213900/Seita.2G177600/Seita.3G246700/Seita.4G276600/Seita.6G129800/Seita.6G228300/Seita.7G304300/Seita.8G011000/Seita.9G079700/Seita.9G471700	10
greenyellow	BP	GO:0051053	negative regulation of DNA metabolic process	4/181	37/9983	0.0043275	0.0265532	0.0213169	Seita.1G314900/Seita.5G114900/Seita.7G307400/Seita.8G007000	4
greenyellow	BP	GO:0006349	regulation of gene expression by genetic imprinting	3/181	19/9983	0.00458658	0.0277389	0.0222688	Seita.2G023300/Seita.6G228300/Seita.9G112500	3
greenyellow	BP	GO:0008608	attachment of spindle microtubules to kinetochore	3/181	19/9983	0.00458658	0.0277389	0.0222688	Seita.3G083100/Seita.5G114900/Seita.8G146100	3
greenyellow	BP	GO:0071514	genetic imprinting	3/181	19/9983	0.00458658	0.0277389	0.0222688	Seita.2G023300/Seita.6G228300/Seita.9G112500	3
greenyellow	BP	GO:0034293	sexual sporulation	4/181	38/9983	0.00476923	0.0287062	0.0230453	Seita.3G318600/Seita.5G005800/Seita.5G056000/Seita.9G069600	4
greenyellow	BP	GO:0016573	histone acetylation	5/181	62/9983	0.00520635	0.0311887	0.0250383	Seita.2G023300/Seita.3G183600/Seita.5G114900/Seita.7G163500/Seita.9G112500	5
greenyellow	BP	GO:0032269	negative regulation of cellular protein metabolic process	8/181	147/9983	0.00525018	0.031303	0.02513	Seita.1G214700/Seita.2G023300/Seita.3G183600/Seita.4G091000/Seita.7G134400/Seita.7G163500/Seita.9G112500/Seita.9G496000	8
greenyellow	BP	GO:0090558	plant epidermis development	12/181	286/9983	0.00584434	0.0346819	0.0278426	Seita.1G092900/Seita.1G213900/Seita.1G214700/Seita.3G246700/Seita.4G271100/Seita.4G276600/Seita.5G413200/Seita.6G228300/Seita.7G134400/Seita.7G304300/Seita.8G011000/Seita.9G079700	12
greenyellow	BP	GO:0120036	plasma membrane bounded cell projection organization	5/181	64/9983	0.00595933	0.035199	0.0282577	Seita.1G081300/Seita.4G085900/Seita.5G056000/Seita.5G218400/Seita.7G147500	5
greenyellow	BP	GO:0006475	internal protein amino acid acetylation	5/181	65/9983	0.0063632	0.0370649	0.0297556	Seita.2G023300/Seita.3G183600/Seita.5G114900/Seita.7G163500/Seita.9G112500	5
greenyellow	BP	GO:0018393	internal peptidyl-lysine acetylation	5/181	65/9983	0.0063632	0.0370649	0.0297556	Seita.2G023300/Seita.3G183600/Seita.5G114900/Seita.7G163500/Seita.9G112500	5
greenyellow	BP	GO:0018394	peptidyl-lysine acetylation	5/181	65/9983	0.0063632	0.0370649	0.0297556	Seita.2G023300/Seita.3G183600/Seita.5G114900/Seita.7G163500/Seita.9G112500	5
greenyellow	BP	GO:0042631	cellular response to water deprivation	4/181	42/9983	0.00683778	0.0391084	0.0313961	Seita.2G141900/Seita.8G229300/Seita.9G191400/Seita.9G424800	4
greenyellow	BP	GO:0043934	sporulation	4/181	42/9983	0.00683778	0.0391084	0.0313961	Seita.3G318600/Seita.5G005800/Seita.5G056000/Seita.9G069600	4
greenyellow	BP	GO:0045488	pectin metabolic process	4/181	42/9983	0.00683778	0.0391084	0.0313961	Seita.2G177600/Seita.3G096400/Seita.6G129800/Seita.9G079700	4
greenyellow	BP	GO:0071462	cellular response to water stimulus	4/181	42/9983	0.00683778	0.0391084	0.0313961	Seita.2G141900/Seita.8G229300/Seita.9G191400/Seita.9G424800	4
greenyellow	BP	GO:0043967	histone H4 acetylation	3/181	22/9983	0.00700479	0.0398831	0.0320181	Seita.2G023300/Seita.5G114900/Seita.9G112500	3
greenyellow	BP	GO:0030030	cell projection organization	5/181	68/9983	0.00768964	0.0435861	0.0349909	Seita.1G081300/Seita.4G085900/Seita.5G056000/Seita.5G218400/Seita.7G147500	5
greenyellow	BP	GO:1900426	positive regulation of defense response to bacterium	3/181	23/9983	0.00794949	0.0448578	0.0360118	Seita.1G214700/Seita.5G319200/Seita.7G134400	3
greenyellow	BP	GO:0051248	negative regulation of protein metabolic process	8/181	158/9983	0.00802186	0.045065	0.0361781	Seita.1G214700/Seita.2G023300/Seita.3G183600/Seita.4G091000/Seita.7G134400/Seita.7G163500/Seita.9G112500/Seita.9G496000	8
greenyellow	BP	GO:0034728	nucleosome organization	4/181	44/9983	0.00806429	0.0451029	0.0362085	Seita.3G198000/Seita.3G227400/Seita.4G066200/Seita.5G413200	4
greenyellow	BP	GO:0000723	telomere maintenance	4/181	45/9983	0.00872826	0.0483882	0.038846	Seita.2G217400/Seita.3G086800/Seita.5G114900/Seita.9G491000	4
greenyellow	BP	GO:0010393	galacturonan metabolic process	4/181	45/9983	0.00872826	0.0483882	0.038846	Seita.2G177600/Seita.3G096400/Seita.6G129800/Seita.9G079700	4
greenyellow	CC	GO:0005694	chromosome	45/183	367/9955	3.44901e-25	6.03577e-23	4.10251e-23	Seita.1G052600/Seita.1G170500/Seita.1G329800/Seita.1G352100/Seita.1G376600/Seita.2G023300/Seita.2G217400/Seita.2G287100/Seita.2G290600/Seita.2G326500/Seita.2G391700/Seita.2G400500/Seita.3G063000/Seita.3G083100/Seita.3G086800/Seita.3G115400/Seita.3G151900/Seita.3G198000/Seita.3G217300/Seita.3G227400/Seita.3G347600/Seita.4G066200/Seita.5G114900/Seita.5G117500/Seita.5G179700/Seita.5G192100/Seita.5G3…	45
greenyellow	CC	GO:0044427	chromosomal part	41/183	316/9955	7.08111e-24	6.19597e-22	4.2114e-22	Seita.1G052600/Seita.1G170500/Seita.1G329800/Seita.1G352100/Seita.1G376600/Seita.2G023300/Seita.2G217400/Seita.2G287100/Seita.2G290600/Seita.2G326500/Seita.2G391700/Seita.2G400500/Seita.3G063000/Seita.3G083100/Seita.3G086800/Seita.3G115400/Seita.3G151900/Seita.3G198000/Seita.3G217300/Seita.3G227400/Seita.4G066200/Seita.5G114900/Seita.5G117500/Seita.5G179700/Seita.5G192100/Seita.5G370600/Seita.6G1…	41
greenyellow	CC	GO:0015630	microtubule cytoskeleton	33/183	221/9955	3.39707e-21	1.98162e-19	1.34691e-19	Seita.1G052200/Seita.1G052600/Seita.1G317100/Seita.1G360100/Seita.2G161300/Seita.2G391700/Seita.2G406300/Seita.3G083100/Seita.3G151900/Seita.3G217300/Seita.3G244600/Seita.3G251500/Seita.4G085900/Seita.5G056000/Seita.5G114900/Seita.5G137200/Seita.5G179700/Seita.5G218400/Seita.5G274500/Seita.6G243300/Seita.7G058500/Seita.7G130100/Seita.7G144300/Seita.7G258800/Seita.8G146100/Seita.9G090900/Seita.9G1…	33
greenyellow	CC	GO:0005856	cytoskeleton	37/183	317/9955	6.13897e-20	2.6858e-18	1.82553e-18	Seita.1G052200/Seita.1G052600/Seita.1G317100/Seita.1G360100/Seita.2G161300/Seita.2G391700/Seita.2G406300/Seita.3G083100/Seita.3G151900/Seita.3G178000/Seita.3G217300/Seita.3G244600/Seita.3G251500/Seita.4G085900/Seita.5G056000/Seita.5G114900/Seita.5G137200/Seita.5G179700/Seita.5G218400/Seita.5G274500/Seita.5G318600/Seita.6G243300/Seita.7G058500/Seita.7G130100/Seita.7G144300/Seita.7G147500/Seita.7G2…	37
greenyellow	CC	GO:0044430	cytoskeletal part	34/183	264/9955	1.02478e-19	3.58673e-18	2.43789e-18	Seita.1G052200/Seita.1G052600/Seita.1G317100/Seita.1G360100/Seita.2G161300/Seita.2G391700/Seita.2G406300/Seita.3G083100/Seita.3G151900/Seita.3G217300/Seita.3G244600/Seita.3G251500/Seita.4G085900/Seita.5G056000/Seita.5G114900/Seita.5G137200/Seita.5G179700/Seita.5G218400/Seita.5G274500/Seita.6G243300/Seita.7G058500/Seita.7G130100/Seita.7G144300/Seita.7G258800/Seita.8G146100/Seita.9G090900/Seita.9G1…	34
greenyellow	CC	GO:0005871	kinesin complex	18/183	59/9955	8.30684e-18	2.42283e-16	1.64679e-16	Seita.1G052200/Seita.1G317100/Seita.1G360100/Seita.2G406300/Seita.3G151900/Seita.3G217300/Seita.3G251500/Seita.5G179700/Seita.5G218400/Seita.6G243300/Seita.7G058500/Seita.7G130100/Seita.8G146100/Seita.9G090900/Seita.9G177700/Seita.9G284500/Seita.9G449500/Seita.J002300	18
greenyellow	CC	GO:0098687	chromosomal region	20/183	94/9955	2.83227e-16	7.08068e-15	4.81273e-15	Seita.1G052600/Seita.2G217400/Seita.2G287100/Seita.2G326500/Seita.2G391700/Seita.3G083100/Seita.3G115400/Seita.3G151900/Seita.3G198000/Seita.3G227400/Seita.4G066200/Seita.5G114900/Seita.5G179700/Seita.5G370600/Seita.7G144300/Seita.8G146100/Seita.9G123800/Seita.9G233200/Seita.9G450000/Seita.9G491000	20
greenyellow	CC	GO:0005875	microtubule associated complex	19/183	83/9955	3.7894e-16	8.2893e-15	5.63423e-15	Seita.1G052200/Seita.1G317100/Seita.1G360100/Seita.2G391700/Seita.2G406300/Seita.3G151900/Seita.3G217300/Seita.3G251500/Seita.5G179700/Seita.5G218400/Seita.6G243300/Seita.7G058500/Seita.7G130100/Seita.8G146100/Seita.9G090900/Seita.9G177700/Seita.9G284500/Seita.9G449500/Seita.J002300	19
greenyellow	CC	GO:0044454	nuclear chromosome part	24/183	169/9955	4.21152e-15	8.18907e-14	5.56611e-14	Seita.1G052600/Seita.1G170500/Seita.1G376600/Seita.2G217400/Seita.2G287100/Seita.2G290600/Seita.2G326500/Seita.2G391700/Seita.2G400500/Seita.3G063000/Seita.3G086800/Seita.3G115400/Seita.5G114900/Seita.5G117500/Seita.5G370600/Seita.6G101100/Seita.7G073600/Seita.7G307400/Seita.8G007000/Seita.9G084200/Seita.9G123800/Seita.9G450000/Seita.9G491000/Seita.9G515000	24
greenyellow	CC	GO:0000228	nuclear chromosome	24/183	180/9955	1.79723e-14	3.14514e-13	2.13775e-13	Seita.1G052600/Seita.1G170500/Seita.1G376600/Seita.2G217400/Seita.2G287100/Seita.2G290600/Seita.2G326500/Seita.2G391700/Seita.2G400500/Seita.3G063000/Seita.3G086800/Seita.3G115400/Seita.5G114900/Seita.5G117500/Seita.5G370600/Seita.6G101100/Seita.7G073600/Seita.7G307400/Seita.8G007000/Seita.9G084200/Seita.9G123800/Seita.9G450000/Seita.9G491000/Seita.9G515000	24
greenyellow	CC	GO:0005819	spindle	16/183	73/9955	1.86016e-13	2.95935e-12	2.01147e-12	Seita.1G052200/Seita.1G052600/Seita.2G391700/Seita.3G083100/Seita.3G151900/Seita.3G217300/Seita.3G244600/Seita.5G056000/Seita.7G144300/Seita.7G258800/Seita.8G146100/Seita.9G090900/Seita.9G177700/Seita.9G284500/Seita.9G319400/Seita.J002300	16
greenyellow	CC	GO:0000775	chromosome, centromeric region	14/183	55/9955	6.88917e-13	1.00467e-11	6.82874e-12	Seita.1G052600/Seita.2G287100/Seita.2G326500/Seita.2G391700/Seita.3G083100/Seita.3G151900/Seita.3G198000/Seita.5G179700/Seita.5G370600/Seita.7G144300/Seita.8G146100/Seita.9G123800/Seita.9G233200/Seita.9G450000	14
greenyellow	CC	GO:0000785	chromatin	18/183	158/9955	5.70195e-10	7.6757e-09	5.21717e-09	Seita.1G352100/Seita.2G023300/Seita.2G287100/Seita.3G063000/Seita.3G115400/Seita.3G198000/Seita.3G217300/Seita.3G227400/Seita.4G066200/Seita.5G117500/Seita.5G192100/Seita.5G370600/Seita.7G307400/Seita.8G007000/Seita.8G121500/Seita.9G112500/Seita.9G450000/Seita.9G491000	18
greenyellow	CC	GO:0032993	protein-DNA complex	11/183	53/9955	2.33625e-09	2.92031e-08	1.98493e-08	Seita.1G376600/Seita.2G023300/Seita.3G086800/Seita.3G198000/Seita.3G227400/Seita.4G066200/Seita.7G073600/Seita.7G307400/Seita.8G007000/Seita.9G112500/Seita.9G491000	11
greenyellow	CC	GO:0043596	nuclear replication fork	7/183	24/9955	1.68082e-07	1.94217e-06	1.32009e-06	Seita.1G376600/Seita.2G290600/Seita.3G086800/Seita.7G073600/Seita.7G307400/Seita.8G007000/Seita.9G491000	7
greenyellow	CC	GO:0099081	supramolecular polymer	13/183	116/9955	1.88668e-07	1.94217e-06	1.32009e-06	Seita.1G052600/Seita.2G161300/Seita.2G391700/Seita.4G085900/Seita.5G137200/Seita.5G274500/Seita.7G144300/Seita.7G147500/Seita.7G258800/Seita.8G146100/Seita.9G225400/Seita.9G284500/Seita.J002300	13
greenyellow	CC	GO:0099512	supramolecular fiber	13/183	116/9955	1.88668e-07	1.94217e-06	1.32009e-06	Seita.1G052600/Seita.2G161300/Seita.2G391700/Seita.4G085900/Seita.5G137200/Seita.5G274500/Seita.7G144300/Seita.7G147500/Seita.7G258800/Seita.8G146100/Seita.9G225400/Seita.9G284500/Seita.J002300	13
greenyellow	CC	GO:0099080	supramolecular complex	13/183	120/9955	2.81693e-07	2.73868e-06	1.86148e-06	Seita.1G052600/Seita.2G161300/Seita.2G391700/Seita.4G085900/Seita.5G137200/Seita.5G274500/Seita.7G144300/Seita.7G147500/Seita.7G258800/Seita.8G146100/Seita.9G225400/Seita.9G284500/Seita.J002300	13
greenyellow	CC	GO:0099513	polymeric cytoskeletal fiber	12/183	101/9955	2.9772e-07	2.74216e-06	1.86384e-06	Seita.1G052600/Seita.2G161300/Seita.2G391700/Seita.4G085900/Seita.5G137200/Seita.5G274500/Seita.7G144300/Seita.7G258800/Seita.8G146100/Seita.9G225400/Seita.9G284500/Seita.J002300	12
greenyellow	CC	GO:0005657	replication fork	8/183	41/9955	6.36601e-07	5.57026e-06	3.7861e-06	Seita.1G376600/Seita.2G290600/Seita.3G086800/Seita.7G073600/Seita.7G141700/Seita.7G307400/Seita.8G007000/Seita.9G491000	8
greenyellow	CC	GO:0005874	microtubule	11/183	90/9955	7.06643e-07	5.88869e-06	4.00254e-06	Seita.1G052600/Seita.2G161300/Seita.2G391700/Seita.4G085900/Seita.5G137200/Seita.5G274500/Seita.7G144300/Seita.7G258800/Seita.8G146100/Seita.9G284500/Seita.J002300	11
greenyellow	CC	GO:0000776	kinetochore	7/183	33/9955	1.80379e-06	1.43483e-05	9.75255e-06	Seita.1G052600/Seita.2G326500/Seita.3G083100/Seita.3G151900/Seita.7G144300/Seita.8G146100/Seita.9G123800	7
greenyellow	CC	GO:0009524	phragmoplast	9/183	63/9955	1.98252e-06	1.50844e-05	1.02528e-05	Seita.1G360100/Seita.3G244600/Seita.4G085900/Seita.5G056000/Seita.5G179700/Seita.5G274500/Seita.7G058500/Seita.7G258800/Seita.J002300	9
greenyellow	CC	GO:0000347	THO complex	5/183	13/9955	2.26994e-06	1.58896e-05	1.08001e-05	Seita.1G352100/Seita.3G205800/Seita.3G335500/Seita.5G192100/Seita.8G121500	5
greenyellow	CC	GO:0000786	nucleosome	5/183	13/9955	2.26994e-06	1.58896e-05	1.08001e-05	Seita.2G023300/Seita.3G198000/Seita.3G227400/Seita.4G066200/Seita.9G112500	5
greenyellow	CC	GO:0005876	spindle microtubule	6/183	23/9955	2.76703e-06	1.86243e-05	1.26589e-05	Seita.1G052600/Seita.2G391700/Seita.7G144300/Seita.7G258800/Seita.8G146100/Seita.J002300	6
greenyellow	CC	GO:0044815	DNA packaging complex	5/183	14/9955	3.47852e-06	2.17408e-05	1.47772e-05	Seita.2G023300/Seita.3G198000/Seita.3G227400/Seita.4G066200/Seita.9G112500	5
greenyellow	CC	GO:0072686	mitotic spindle	5/183	14/9955	3.47852e-06	2.17408e-05	1.47772e-05	Seita.3G083100/Seita.3G151900/Seita.3G217300/Seita.8G146100/Seita.9G319400	5
greenyellow	CC	GO:0010369	chromocenter	5/183	15/9955	5.14025e-06	3.10187e-05	2.10834e-05	Seita.1G052600/Seita.3G115400/Seita.3G227400/Seita.4G066200/Seita.7G144300	5
greenyellow	CC	GO:0005813	centrosome	6/183	26/9955	6.02769e-06	3.51615e-05	2.38992e-05	Seita.1G052200/Seita.5G114900/Seita.9G090900/Seita.9G123800/Seita.9G128400/Seita.9G177700	6
greenyellow	CC	GO:0005815	microtubule organizing center	7/183	40/9955	7.06134e-06	3.98624e-05	2.70944e-05	Seita.1G052200/Seita.5G114900/Seita.7G258800/Seita.9G090900/Seita.9G123800/Seita.9G128400/Seita.9G177700	7
greenyellow	CC	GO:0000779	condensed chromosome, centromeric region	5/183	16/9955	7.36566e-06	4.02809e-05	2.73789e-05	Seita.1G052600/Seita.2G326500/Seita.2G391700/Seita.8G146100/Seita.9G123800	5
greenyellow	CC	GO:0000790	nuclear chromatin	9/183	86/9955	2.67948e-05	0.000142094	9.65809e-05	Seita.2G287100/Seita.3G063000/Seita.3G115400/Seita.5G117500/Seita.5G370600/Seita.7G307400/Seita.8G007000/Seita.9G450000/Seita.9G491000	9
greenyellow	CC	GO:0000780	condensed nuclear chromosome, centromeric region	4/183	13/9955	6.93971e-05	0.000357191	0.000242782	Seita.1G052600/Seita.2G326500/Seita.2G391700/Seita.9G123800	4
greenyellow	CC	GO:0030894	replisome	4/183	14/9955	9.57645e-05	0.000465522	0.000316415	Seita.1G376600/Seita.3G086800/Seita.7G073600/Seita.9G491000	4
greenyellow	CC	GO:0043601	nuclear replisome	4/183	14/9955	9.57645e-05	0.000465522	0.000316415	Seita.1G376600/Seita.3G086800/Seita.7G073600/Seita.9G491000	4
greenyellow	CC	GO:0000793	condensed chromosome	7/183	60/9955	0.000107324	0.000507612	0.000345023	Seita.1G052600/Seita.2G326500/Seita.2G391700/Seita.5G114900/Seita.6G101100/Seita.8G146100/Seita.9G123800	7
greenyellow	CC	GO:0000794	condensed nuclear chromosome	6/183	46/9955	0.000180761	0.00083245	0.000565816	Seita.1G052600/Seita.2G326500/Seita.2G391700/Seita.5G114900/Seita.6G101100/Seita.9G123800	6
greenyellow	CC	GO:0000792	heterochromatin	4/183	19/9955	0.000345051	0.0015483	0.00105238	Seita.2G287100/Seita.3G115400/Seita.5G370600/Seita.9G450000	4
greenyellow	CC	GO:0000778	condensed nuclear chromosome kinetochore	3/183	11/9955	0.000904441	0.00395693	0.00268952	Seita.1G052600/Seita.2G326500/Seita.9G123800	3
greenyellow	CC	GO:0000777	condensed chromosome kinetochore	3/183	12/9955	0.00118967	0.00507788	0.00345143	Seita.1G052600/Seita.2G326500/Seita.9G123800	3
greenyellow	CC	GO:0009574	preprophase band	3/183	13/9955	0.00152576	0.00620948	0.00422058	Seita.5G056000/Seita.5G274500/Seita.7G258800	3
greenyellow	CC	GO:0033267	axon part	3/183	13/9955	0.00152576	0.00620948	0.00422058	Seita.7G147500/Seita.9G152900/Seita.9G225400	3
greenyellow	CC	GO:0000307	cyclin-dependent protein kinase holoenzyme complex	3/183	14/9955	0.00191576	0.00761948	0.00517896	Seita.4G049800/Seita.7G304300/Seita.8G011000	3
greenyellow	CC	GO:0035861	site of double-strand break	3/183	16/9955	0.00286867	0.0111559	0.00758269	Seita.1G329800/Seita.1G376600/Seita.9G491000	3
greenyellow	CC	GO:0030424	axon	3/183	18/9955	0.00406872	0.0151495	0.0102971	Seita.7G147500/Seita.9G152900/Seita.9G225400	3
greenyellow	CC	GO:0090734	site of DNA damage	3/183	18/9955	0.00406872	0.0151495	0.0102971	Seita.1G329800/Seita.1G376600/Seita.9G491000	3
greenyellow	CC	GO:0000784	nuclear chromosome, telomeric region	3/183	21/9955	0.006369	0.0232203	0.0157828	Seita.2G217400/Seita.5G114900/Seita.9G491000	3
greenyellow	CC	GO:0030863	cortical cytoskeleton	4/183	42/9955	0.00717395	0.0256213	0.0174148	Seita.3G178000/Seita.5G274500/Seita.5G318600/Seita.7G258800	4
greenyellow	CC	GO:0005881	cytoplasmic microtubule	3/183	25/9955	0.0104382	0.0351285	0.0238768	Seita.4G085900/Seita.5G274500/Seita.7G258800	3
greenyellow	CC	GO:1902554	serine/threonine protein kinase complex	3/183	25/9955	0.0104382	0.0351285	0.0238768	Seita.4G049800/Seita.7G304300/Seita.8G011000	3
greenyellow	CC	GO:1902911	protein kinase complex	3/183	25/9955	0.0104382	0.0351285	0.0238768	Seita.4G049800/Seita.7G304300/Seita.8G011000	3
greenyellow	CC	GO:0000781	chromosome, telomeric region	3/183	28/9955	0.0142825	0.0471593	0.0320541	Seita.2G217400/Seita.5G114900/Seita.9G491000	3
greenyellow	MF	GO:0003777	microtubule motor activity	18/143	59/8539	1.30418e-18	3.23436e-16	2.89664e-16	Seita.1G052200/Seita.1G317100/Seita.1G360100/Seita.2G406300/Seita.3G151900/Seita.3G217300/Seita.3G251500/Seita.5G179700/Seita.5G218400/Seita.6G243300/Seita.7G058500/Seita.7G130100/Seita.8G146100/Seita.9G090900/Seita.9G177700/Seita.9G284500/Seita.9G449500/Seita.J002300	18
greenyellow	MF	GO:0003774	motor activity	18/143	64/8539	6.76247e-18	8.38546e-16	7.5099e-16	Seita.1G052200/Seita.1G317100/Seita.1G360100/Seita.2G406300/Seita.3G151900/Seita.3G217300/Seita.3G251500/Seita.5G179700/Seita.5G218400/Seita.6G243300/Seita.7G058500/Seita.7G130100/Seita.8G146100/Seita.9G090900/Seita.9G177700/Seita.9G284500/Seita.9G449500/Seita.J002300	18
greenyellow	MF	GO:1990939	ATP-dependent microtubule motor activity	10/143	22/8539	6.88726e-13	5.16609e-11	4.62667e-11	Seita.1G317100/Seita.1G360100/Seita.3G151900/Seita.5G218400/Seita.6G243300/Seita.7G058500/Seita.9G177700/Seita.9G284500/Seita.9G449500/Seita.J002300	10
greenyellow	MF	GO:0008574	ATP-dependent microtubule motor activity, plus-end-directed	9/143	16/8539	8.3324e-13	5.16609e-11	4.62667e-11	Seita.1G317100/Seita.1G360100/Seita.3G151900/Seita.5G218400/Seita.6G243300/Seita.7G058500/Seita.9G177700/Seita.9G284500/Seita.9G449500	9
greenyellow	MF	GO:0003688	DNA replication origin binding	6/143	10/8539	3.94766e-09	1.95804e-07	1.75359e-07	Seita.2G290600/Seita.2G400500/Seita.7G307400/Seita.8G007000/Seita.9G084200/Seita.9G515000	6
greenyellow	MF	GO:0017111	nucleoside-triphosphatase activity	26/143	451/8539	2.30578e-08	9.53055e-07	8.53543e-07	Seita.1G052200/Seita.1G317100/Seita.1G329800/Seita.1G360100/Seita.2G023300/Seita.2G406300/Seita.3G151900/Seita.3G217300/Seita.3G251500/Seita.5G128200/Seita.5G179700/Seita.5G218400/Seita.5G316800/Seita.6G243300/Seita.7G058500/Seita.7G130100/Seita.7G307400/Seita.8G007000/Seita.8G146100/Seita.8G229300/Seita.9G090900/Seita.9G112500/Seita.9G177700/Seita.9G284500/Seita.9G449500/Seita.J002300	26
greenyellow	MF	GO:0016887	ATPase activity	23/143	379/8539	6.56057e-08	2.32432e-06	2.08162e-06	Seita.1G052200/Seita.1G317100/Seita.1G329800/Seita.1G360100/Seita.2G023300/Seita.2G406300/Seita.3G151900/Seita.3G217300/Seita.3G251500/Seita.5G128200/Seita.5G179700/Seita.5G218400/Seita.6G243300/Seita.7G058500/Seita.7G130100/Seita.8G146100/Seita.8G229300/Seita.9G090900/Seita.9G112500/Seita.9G177700/Seita.9G284500/Seita.9G449500/Seita.J002300	23
greenyellow	MF	GO:0016462	pyrophosphatase activity	26/143	481/8539	8.5031e-08	2.34308e-06	2.09843e-06	Seita.1G052200/Seita.1G317100/Seita.1G329800/Seita.1G360100/Seita.2G023300/Seita.2G406300/Seita.3G151900/Seita.3G217300/Seita.3G251500/Seita.5G128200/Seita.5G179700/Seita.5G218400/Seita.5G316800/Seita.6G243300/Seita.7G058500/Seita.7G130100/Seita.7G307400/Seita.8G007000/Seita.8G146100/Seita.8G229300/Seita.9G090900/Seita.9G112500/Seita.9G177700/Seita.9G284500/Seita.9G449500/Seita.J002300	26
greenyellow	MF	GO:0016818	hydrolase activity, acting on acid anhydrides, in phosphorus-containing anhydrides	26/143	481/8539	8.5031e-08	2.34308e-06	2.09843e-06	Seita.1G052200/Seita.1G317100/Seita.1G329800/Seita.1G360100/Seita.2G023300/Seita.2G406300/Seita.3G151900/Seita.3G217300/Seita.3G251500/Seita.5G128200/Seita.5G179700/Seita.5G218400/Seita.5G316800/Seita.6G243300/Seita.7G058500/Seita.7G130100/Seita.7G307400/Seita.8G007000/Seita.8G146100/Seita.8G229300/Seita.9G090900/Seita.9G112500/Seita.9G177700/Seita.9G284500/Seita.9G449500/Seita.J002300	26
greenyellow	MF	GO:0016817	hydrolase activity, acting on acid anhydrides	26/143	485/8539	1.0034e-07	2.48843e-06	2.2286e-06	Seita.1G052200/Seita.1G317100/Seita.1G329800/Seita.1G360100/Seita.2G023300/Seita.2G406300/Seita.3G151900/Seita.3G217300/Seita.3G251500/Seita.5G128200/Seita.5G179700/Seita.5G218400/Seita.5G316800/Seita.6G243300/Seita.7G058500/Seita.7G130100/Seita.7G307400/Seita.8G007000/Seita.8G146100/Seita.8G229300/Seita.9G090900/Seita.9G112500/Seita.9G177700/Seita.9G284500/Seita.9G449500/Seita.J002300	26
greenyellow	MF	GO:0003682	chromatin binding	13/143	139/8539	5.04383e-07	1.13715e-05	1.01842e-05	Seita.1G170500/Seita.2G287100/Seita.3G115400/Seita.3G198000/Seita.3G227400/Seita.4G066200/Seita.5G117500/Seita.5G192100/Seita.5G370600/Seita.6G101100/Seita.7G307400/Seita.8G007000/Seita.9G450000	13
greenyellow	MF	GO:0015631	tubulin binding	9/143	84/8539	1.02015e-05	0.000210831	0.000188817	Seita.1G360100/Seita.5G056000/Seita.5G114900/Seita.5G137200/Seita.5G274500/Seita.5G316800/Seita.7G258800/Seita.8G146100/Seita.J002300	9
greenyellow	MF	GO:0008092	cytoskeletal protein binding	13/143	185/8539	1.24427e-05	0.000237369	0.000212585	Seita.1G360100/Seita.3G396900/Seita.4G085900/Seita.5G056000/Seita.5G114900/Seita.5G137200/Seita.5G274500/Seita.5G316800/Seita.7G147500/Seita.7G258800/Seita.8G146100/Seita.8G161900/Seita.J002300	13
greenyellow	MF	GO:0008017	microtubule binding	8/143	73/8539	2.7286e-05	0.000483352	0.000432883	Seita.1G360100/Seita.5G056000/Seita.5G137200/Seita.5G274500/Seita.5G316800/Seita.7G258800/Seita.8G146100/Seita.J002300	8
greenyellow	MF	GO:0140097	catalytic activity, acting on DNA	10/143	142/8539	0.000127944	0.00211535	0.00189448	Seita.1G170500/Seita.1G329800/Seita.1G337000/Seita.2G023300/Seita.2G217400/Seita.7G073600/Seita.7G307400/Seita.8G007000/Seita.8G229300/Seita.9G112500	10
greenyellow	MF	GO:0042623	ATPase activity, coupled	15/143	301/8539	0.000147938	0.00229304	0.00205361	Seita.1G317100/Seita.1G329800/Seita.1G360100/Seita.2G023300/Seita.3G151900/Seita.5G128200/Seita.5G218400/Seita.6G243300/Seita.7G058500/Seita.8G229300/Seita.9G112500/Seita.9G177700/Seita.9G284500/Seita.9G449500/Seita.J002300	15
greenyellow	MF	GO:0003678	DNA helicase activity	5/143	37/8539	0.000347686	0.00507212	0.00454252	Seita.2G023300/Seita.7G307400/Seita.8G007000/Seita.8G229300/Seita.9G112500	5
greenyellow	MF	GO:0031492	nucleosomal DNA binding	3/143	10/8539	0.000506306	0.00697577	0.0062474	Seita.3G198000/Seita.3G227400/Seita.4G066200	3
greenyellow	MF	GO:0003697	single-stranded DNA binding	6/143	65/8539	0.000728159	0.00950439	0.008512	Seita.2G290600/Seita.5G114900/Seita.7G073600/Seita.7G307400/Seita.8G007000/Seita.9G491000	6
greenyellow	MF	GO:1990837	sequence-specific double-stranded DNA binding	8/143	133/8539	0.00171358	0.0212484	0.0190298	Seita.2G229500/Seita.2G290600/Seita.2G400500/Seita.5G322800/Seita.7G307400/Seita.8G007000/Seita.9G084200/Seita.9G515000	8
greenyellow	MF	GO:0043138	3'-5' DNA helicase activity	3/143	15/8539	0.0018053	0.0213197	0.0190936	Seita.7G307400/Seita.8G007000/Seita.8G229300	3
greenyellow	MF	GO:0003690	double-stranded DNA binding	10/143	213/8539	0.00300887	0.0339182	0.0303766	Seita.2G229500/Seita.2G290600/Seita.2G400500/Seita.3G115400/Seita.5G128200/Seita.5G322800/Seita.7G307400/Seita.8G007000/Seita.9G084200/Seita.9G515000	10
greenyellow	MF	GO:0031491	nucleosome binding	3/143	20/8539	0.00425453	0.0458749	0.0410849	Seita.3G198000/Seita.3G227400/Seita.4G066200	3
grey60	BP	GO:0018344	protein geranylgeranylation	4/53	12/9983	3.39602e-07	0.000201449	0.000198088	Seita.6G111100/Seita.6G111200/Seita.6G128000/Seita.9G319900	4
grey60	BP	GO:0018342	protein prenylation	4/53	15/9983	9.25493e-07	0.000201449	0.000198088	Seita.6G111100/Seita.6G111200/Seita.6G128000/Seita.9G319900	4
grey60	BP	GO:0097354	prenylation	4/53	15/9983	9.25493e-07	0.000201449	0.000198088	Seita.6G111100/Seita.6G111200/Seita.6G128000/Seita.9G319900	4
grey60	CC	GO:0005968	Rab-protein geranylgeranyltransferase complex	4/52	11/9955	2.12618e-07	2.31753e-05	2.26046e-05	Seita.6G111100/Seita.6G111200/Seita.6G128000/Seita.9G319900	4
grey60	MF	GO:0017137	Rab GTPase binding	5/43	40/8539	1.47174e-06	0.000167778	0.000167313	Seita.3G356500/Seita.6G111100/Seita.6G111200/Seita.6G128000/Seita.9G319900	5
grey60	MF	GO:0017016	Ras GTPase binding	5/43	63/8539	1.44333e-05	0.000548464	0.000546944	Seita.3G356500/Seita.6G111100/Seita.6G111200/Seita.6G128000/Seita.9G319900	5
grey60	MF	GO:0031267	small GTPase binding	5/43	63/8539	1.44333e-05	0.000548464	0.000546944	Seita.3G356500/Seita.6G111100/Seita.6G111200/Seita.6G128000/Seita.9G319900	5
grey60	MF	GO:0051020	GTPase binding	5/43	95/8539	0.000105642	0.0030108	0.00300246	Seita.3G356500/Seita.6G111100/Seita.6G111200/Seita.6G128000/Seita.9G319900	5
lightcyan	BP	GO:0001525	angiogenesis	3/43	10/9983	8.74745e-06	0.00110568	0.000832389	Seita.9G279300/Seita.9G279400/Seita.J028600	3
lightcyan	BP	GO:0001568	blood vessel development	3/43	10/9983	8.74745e-06	0.00110568	0.000832389	Seita.9G279300/Seita.9G279400/Seita.J028600	3
lightcyan	BP	GO:0001944	vasculature development	3/43	10/9983	8.74745e-06	0.00110568	0.000832389	Seita.9G279300/Seita.9G279400/Seita.J028600	3
lightcyan	BP	GO:0043393	regulation of protein binding	3/43	10/9983	8.74745e-06	0.00110568	0.000832389	Seita.9G279300/Seita.9G279400/Seita.J028600	3
lightcyan	BP	GO:0048514	blood vessel morphogenesis	3/43	10/9983	8.74745e-06	0.00110568	0.000832389	Seita.9G279300/Seita.9G279400/Seita.J028600	3
lightcyan	BP	GO:0033273	response to vitamin	3/43	12/9983	1.59408e-05	0.0011194	0.000842718	Seita.9G279300/Seita.9G279400/Seita.J028600	3
lightcyan	BP	GO:0043281	regulation of cysteine-type endopeptidase activity involved in apoptotic process	3/43	12/9983	1.59408e-05	0.0011194	0.000842718	Seita.9G279300/Seita.9G279400/Seita.J028600	3
lightcyan	BP	GO:0072358	cardiovascular system development	3/43	12/9983	1.59408e-05	0.0011194	0.000842718	Seita.9G279300/Seita.9G279400/Seita.J028600	3
lightcyan	BP	GO:2000059	negative regulation of ubiquitin-dependent protein catabolic process	3/43	12/9983	1.59408e-05	0.0011194	0.000842718	Seita.9G279300/Seita.9G279400/Seita.J028600	3
lightcyan	BP	GO:1903051	negative regulation of proteolysis involved in cellular protein catabolic process	3/43	13/9983	2.06608e-05	0.00118706	0.000893654	Seita.9G279300/Seita.9G279400/Seita.J028600	3
lightcyan	BP	GO:1903363	negative regulation of cellular protein catabolic process	3/43	13/9983	2.06608e-05	0.00118706	0.000893654	Seita.9G279300/Seita.9G279400/Seita.J028600	3
lightcyan	BP	GO:0048588	developmental cell growth	6/43	164/9983	6.61107e-05	0.00310357	0.00233646	Seita.2G056200/Seita.5G162100/Seita.6G054000/Seita.8G051100/Seita.9G042000/Seita.9G289600	6
lightcyan	BP	GO:0018108	peptidyl-tyrosine phosphorylation	3/43	19/9983	6.875e-05	0.00310357	0.00233646	Seita.9G279300/Seita.9G279400/Seita.J028600	3
lightcyan	BP	GO:0018212	peptidyl-tyrosine modification	3/43	19/9983	6.875e-05	0.00310357	0.00233646	Seita.9G279300/Seita.9G279400/Seita.J028600	3
lightcyan	BP	GO:0042177	negative regulation of protein catabolic process	3/43	21/9983	9.37974e-05	0.003705	0.00278924	Seita.9G279300/Seita.9G279400/Seita.J028600	3
lightcyan	BP	GO:0051098	regulation of binding	3/43	21/9983	9.37974e-05	0.003705	0.00278924	Seita.9G279300/Seita.9G279400/Seita.J028600	3
lightcyan	BP	GO:0072359	circulatory system development	3/43	22/9983	0.000108282	0.00402553	0.00303055	Seita.9G279300/Seita.9G279400/Seita.J028600	3
lightcyan	BP	GO:2000116	regulation of cysteine-type endopeptidase activity	3/43	23/9983	0.000124151	0.00435906	0.00328164	Seita.9G279300/Seita.9G279400/Seita.J028600	3
lightcyan	BP	GO:0007186	G protein-coupled receptor signaling pathway	3/43	28/9983	0.000226232	0.00720362	0.00542311	Seita.9G279300/Seita.9G279400/Seita.J028600	3
lightcyan	BP	GO:0018193	peptidyl-amino acid modification	8/43	392/9983	0.000227963	0.00720362	0.00542311	Seita.2G361500/Seita.4G020500/Seita.7G121200/Seita.8G051100/Seita.9G000200/Seita.9G279300/Seita.9G279400/Seita.J028600	8
lightcyan	BP	GO:0006915	apoptotic process	4/43	76/9983	0.00030567	0.00919922	0.00692546	Seita.9G042000/Seita.9G279300/Seita.9G279400/Seita.J028600	4
lightcyan	BP	GO:0006887	exocytosis	4/43	77/9983	0.000321415	0.00923338	0.00695118	Seita.1G355600/Seita.2G010600/Seita.5G470100/Seita.9G386900	4
lightcyan	BP	GO:0042455	ribonucleoside biosynthetic process	3/43	32/9983	0.000338438	0.0092997	0.0070011	Seita.9G279300/Seita.9G279400/Seita.J028600	3
lightcyan	BP	GO:0022603	regulation of anatomical structure morphogenesis	5/43	150/9983	0.000435258	0.0108654	0.0081798	Seita.2G056200/Seita.8G051100/Seita.9G279300/Seita.9G279400/Seita.J028600	5
lightcyan	BP	GO:0009163	nucleoside biosynthetic process	3/43	35/9983	0.000442588	0.0108654	0.0081798	Seita.9G279300/Seita.9G279400/Seita.J028600	3
lightcyan	BP	GO:0008219	cell death	6/43	234/9983	0.00045871	0.0108654	0.0081798	Seita.3G264700/Seita.9G042000/Seita.9G279300/Seita.9G279400/Seita.9G375200/Seita.J028600	6
lightcyan	BP	GO:0007584	response to nutrient	3/43	36/9983	0.000481378	0.0108654	0.0081798	Seita.9G279300/Seita.9G279400/Seita.J028600	3
lightcyan	BP	GO:0035239	tube morphogenesis	3/43	36/9983	0.000481378	0.0108654	0.0081798	Seita.9G279300/Seita.9G279400/Seita.J028600	3
lightcyan	BP	GO:0006935	chemotaxis	3/43	39/9983	0.000610634	0.012864	0.00968443	Seita.9G279300/Seita.9G279400/Seita.J028600	3
lightcyan	BP	GO:0042330	taxis	3/43	39/9983	0.000610634	0.012864	0.00968443	Seita.9G279300/Seita.9G279400/Seita.J028600	3
lightcyan	BP	GO:2000058	regulation of ubiquitin-dependent protein catabolic process	3/43	41/9983	0.000708005	0.0144342	0.0108665	Seita.9G279300/Seita.9G279400/Seita.J028600	3
lightcyan	BP	GO:0035295	tube development	3/43	42/9983	0.000760186	0.0150137	0.0113028	Seita.9G279300/Seita.9G279400/Seita.J028600	3
lightcyan	BP	GO:0052548	regulation of endopeptidase activity	3/43	43/9983	0.000814755	0.0156038	0.011747	Seita.9G279300/Seita.9G279400/Seita.J028600	3
lightcyan	BP	GO:0031330	negative regulation of cellular catabolic process	3/43	44/9983	0.000871756	0.0157414	0.0118506	Seita.9G279300/Seita.9G279400/Seita.J028600	3
lightcyan	BP	GO:0052547	regulation of peptidase activity	3/43	44/9983	0.000871756	0.0157414	0.0118506	Seita.9G279300/Seita.9G279400/Seita.J028600	3
lightcyan	BP	GO:0006108	malate metabolic process	2/43	11/9983	0.000972511	0.0165188	0.0124359	Seita.3G284800/Seita.7G040900	2
lightcyan	BP	GO:0009119	ribonucleoside metabolic process	3/43	46/9983	0.000993222	0.0165188	0.0124359	Seita.9G279300/Seita.9G279400/Seita.J028600	3
lightcyan	BP	GO:0045861	negative regulation of proteolysis	3/43	46/9983	0.000993222	0.0165188	0.0124359	Seita.9G279300/Seita.9G279400/Seita.J028600	3
lightcyan	BP	GO:0008284	positive regulation of cell proliferation	3/43	47/9983	0.00105777	0.0167128	0.0125819	Seita.9G279300/Seita.9G279400/Seita.J028600	3
lightcyan	BP	GO:0043648	dicarboxylic acid metabolic process	3/43	47/9983	0.00105777	0.0167128	0.0125819	Seita.3G284800/Seita.7G040900/Seita.8G121600	3
lightcyan	BP	GO:0061024	membrane organization	5/43	185/9983	0.00112592	0.0171055	0.0128776	Seita.1G355600/Seita.2G010600/Seita.2G169500/Seita.5G470100/Seita.9G042000	5
lightcyan	BP	GO:0012501	programmed cell death	5/43	186/9983	0.00115336	0.0171055	0.0128776	Seita.9G042000/Seita.9G279300/Seita.9G279400/Seita.9G375200/Seita.J028600	5
lightcyan	BP	GO:0006614	SRP-dependent cotranslational protein targeting to membrane	2/43	12/9983	0.00116383	0.0171055	0.0128776	Seita.2G055700/Seita.2G056200	2
lightcyan	BP	GO:0009116	nucleoside metabolic process	3/43	50/9983	0.00126716	0.018201	0.0137023	Seita.9G279300/Seita.9G279400/Seita.J028600	3
lightcyan	BP	GO:0006613	cotranslational protein targeting to membrane	2/43	13/9983	0.00137167	0.0187	0.014078	Seita.2G055700/Seita.2G056200	2
lightcyan	BP	GO:0048199	vesicle targeting, to, from or within Golgi	2/43	13/9983	0.00137167	0.0187	0.014078	Seita.2G010600/Seita.5G470100	2
lightcyan	BP	GO:0090501	RNA phosphodiester bond hydrolysis	4/43	114/9983	0.00141227	0.0187	0.014078	Seita.1G011500/Seita.1G038100/Seita.2G055700/Seita.8G103000	4
lightcyan	BP	GO:0009895	negative regulation of catabolic process	3/43	52/9983	0.00142026	0.0187	0.014078	Seita.9G279300/Seita.9G279400/Seita.J028600	3
lightcyan	BP	GO:1903050	regulation of proteolysis involved in cellular protein catabolic process	3/43	53/9983	0.00150097	0.0193595	0.0145744	Seita.9G279300/Seita.9G279400/Seita.J028600	3
lightcyan	BP	GO:1903362	regulation of cellular protein catabolic process	3/43	54/9983	0.00158452	0.019731	0.0148542	Seita.9G279300/Seita.9G279400/Seita.J028600	3
lightcyan	BP	GO:0048194	Golgi vesicle budding	2/43	14/9983	0.00159592	0.019731	0.0148542	Seita.2G010600/Seita.5G470100	2
lightcyan	BP	GO:0048468	cell development	7/43	409/9983	0.00165222	0.019731	0.0148542	Seita.2G056200/Seita.2G361500/Seita.5G162100/Seita.6G054000/Seita.8G051100/Seita.9G042000/Seita.9G289600	7
lightcyan	BP	GO:0032940	secretion by cell	4/43	119/9983	0.00165466	0.019731	0.0148542	Seita.1G355600/Seita.2G010600/Seita.5G470100/Seita.9G386900	4
lightcyan	BP	GO:0006903	vesicle targeting	2/43	15/9983	0.00183642	0.0214929	0.0161805	Seita.2G010600/Seita.5G470100	2
lightcyan	BP	GO:0060560	developmental growth involved in morphogenesis	6/43	310/9983	0.00197643	0.022711	0.0170975	Seita.2G056200/Seita.5G162100/Seita.6G054000/Seita.8G051100/Seita.9G042000/Seita.9G289600	6
lightcyan	BP	GO:0046903	secretion	4/43	126/9983	0.00204073	0.0230311	0.0173385	Seita.1G355600/Seita.2G010600/Seita.5G470100/Seita.9G386900	4
lightcyan	BP	GO:1901659	glycosyl compound biosynthetic process	3/43	62/9983	0.0023589	0.0261548	0.0196902	Seita.9G279300/Seita.9G279400/Seita.J028600	3
lightcyan	BP	GO:0000184	nuclear-transcribed mRNA catabolic process, nonsense-mediated decay	2/43	18/9983	0.00265408	0.028441	0.0214113	Seita.2G055700/Seita.2G056200	2
lightcyan	BP	GO:0042176	regulation of protein catabolic process	3/43	65/9983	0.00270009	0.028441	0.0214113	Seita.9G279300/Seita.9G279400/Seita.J028600	3
lightcyan	BP	GO:0042981	regulation of apoptotic process	3/43	65/9983	0.00270009	0.028441	0.0214113	Seita.9G279300/Seita.9G279400/Seita.J028600	3
lightcyan	BP	GO:0045055	regulated exocytosis	2/43	19/9983	0.00295823	0.0306492	0.0230737	Seita.2G010600/Seita.5G470100	2
lightcyan	BP	GO:0031123	RNA 3'-end processing	3/43	69/9983	0.00320029	0.0318719	0.0239942	Seita.1G011500/Seita.1G038100/Seita.8G103000	3
lightcyan	BP	GO:0090502	RNA phosphodiester bond hydrolysis, endonucleolytic	3/43	69/9983	0.00320029	0.0318719	0.0239942	Seita.1G011500/Seita.1G038100/Seita.2G055700	3
lightcyan	BP	GO:0051648	vesicle localization	2/43	20/9983	0.00327797	0.0318719	0.0239942	Seita.2G010600/Seita.5G470100	2
lightcyan	BP	GO:0051650	establishment of vesicle localization	2/43	20/9983	0.00327797	0.0318719	0.0239942	Seita.2G010600/Seita.5G470100	2
lightcyan	BP	GO:0006900	vesicle budding from membrane	2/43	21/9983	0.00361314	0.0345986	0.0260469	Seita.2G010600/Seita.5G470100	2
lightcyan	BP	GO:0031329	regulation of cellular catabolic process	4/43	151/9983	0.00392601	0.0357803	0.0269365	Seita.9G279300/Seita.9G279400/Seita.9G386900/Seita.J028600	4
lightcyan	BP	GO:1901657	glycosyl compound metabolic process	4/43	151/9983	0.00392601	0.0357803	0.0269365	Seita.3G270400/Seita.9G279300/Seita.9G279400/Seita.J028600	4
lightcyan	BP	GO:0045047	protein targeting to ER	2/43	22/9983	0.00396363	0.0357803	0.0269365	Seita.2G055700/Seita.2G056200	2
lightcyan	BP	GO:0072599	establishment of protein localization to endoplasmic reticulum	2/43	22/9983	0.00396363	0.0357803	0.0269365	Seita.2G055700/Seita.2G056200	2
lightcyan	BP	GO:0010941	regulation of cell death	4/43	152/9983	0.00401962	0.0357803	0.0269365	Seita.3G264700/Seita.9G279300/Seita.9G279400/Seita.J028600	4
lightcyan	BP	GO:0034404	nucleobase-containing small molecule biosynthetic process	3/43	77/9983	0.00436271	0.0382949	0.0288296	Seita.9G279300/Seita.9G279400/Seita.J028600	3
lightcyan	BP	GO:0016050	vesicle organization	3/43	83/9983	0.0053827	0.0466009	0.0350826	Seita.1G355600/Seita.2G010600/Seita.5G470100	3
lightcyan	BP	GO:0006612	protein targeting to membrane	2/43	26/9983	0.00551605	0.046658	0.0351256	Seita.2G055700/Seita.2G056200	2
lightcyan	BP	GO:0051259	protein complex oligomerization	3/43	84/9983	0.00556545	0.046658	0.0351256	Seita.2G010600/Seita.2G169500/Seita.5G470100	3
lightcyan	BP	GO:0009894	regulation of catabolic process	4/43	167/9983	0.00561077	0.046658	0.0351256	Seita.9G279300/Seita.9G279400/Seita.9G386900/Seita.J028600	4
lightcyan	BP	GO:0070972	protein localization to endoplasmic reticulum	2/43	27/9983	0.00594113	0.0487635	0.0367107	Seita.2G055700/Seita.2G056200	2
lightcyan	CC	GO:0005793	endoplasmic reticulum-Golgi intermediate compartment	2/47	10/9955	0.000958412	0.0437698	0.035419	Seita.2G010600/Seita.5G470100	2
lightcyan	CC	GO:0030667	secretory granule membrane	2/47	11/9955	0.00116787	0.0437698	0.035419	Seita.2G010600/Seita.5G470100	2
lightcyan	CC	GO:0005791	rough endoplasmic reticulum	2/47	12/9955	0.00139723	0.0437698	0.035419	Seita.2G055700/Seita.2G056200	2
lightcyan	CC	GO:0005801	cis-Golgi network	2/47	14/9955	0.00191493	0.0437698	0.035419	Seita.2G010600/Seita.5G470100	2
lightcyan	CC	GO:0043230	extracellular organelle	2/47	14/9955	0.00191493	0.0437698	0.035419	Seita.5G162100/Seita.6G207300	2
lightcyan	CC	GO:0070062	extracellular exosome	2/47	14/9955	0.00191493	0.0437698	0.035419	Seita.5G162100/Seita.6G207300	2
lightcyan	CC	GO:1903561	extracellular vesicle	2/47	14/9955	0.00191493	0.0437698	0.035419	Seita.5G162100/Seita.6G207300	2
lightcyan	CC	GO:0030137	COPI-coated vesicle	2/47	16/9955	0.00251004	0.0446229	0.0361093	Seita.2G010600/Seita.5G470100	2
lightcyan	CC	GO:0030140	trans-Golgi network transport vesicle	2/47	16/9955	0.00251004	0.0446229	0.0361093	Seita.2G010600/Seita.5G470100	2
lightcyan	MF	GO:0044877	protein-containing complex binding	6/37	194/8539	0.000164497	0.00899981	0.00755965	Seita.2G010600/Seita.2G050500/Seita.5G470100/Seita.9G279300/Seita.9G279400/Seita.J028600	6
lightcyan	MF	GO:0044183	protein binding involved in protein folding	3/37	26/8539	0.000181814	0.00899981	0.00755965	Seita.9G279300/Seita.9G279400/Seita.J028600	3
lightcyan	MF	GO:0000149	SNARE binding	3/37	42/8539	0.000765379	0.0252575	0.0212158	Seita.1G355600/Seita.2G010600/Seita.5G470100	3
lightcyan	MF	GO:0016615	malate dehydrogenase activity	2/37	13/8539	0.00138286	0.0342257	0.0287489	Seita.3G284800/Seita.7G040900	2
lightcyan	MF	GO:0003779	actin binding	3/37	64/8539	0.00260177	0.0441504	0.0370854	Seita.9G279300/Seita.9G279400/Seita.J028600	3
lightcyan	MF	GO:0019905	syntaxin binding	2/37	18/8539	0.00267578	0.0441504	0.0370854	Seita.2G010600/Seita.5G470100	2
lightgreen	BP	GO:0090615	mitochondrial mRNA processing	3/60	13/9983	5.65612e-05	0.0332182	0.0321458	Seita.6G218500/Seita.9G204600/Seita.9G204800	3
lightgreen	BP	GO:0140053	mitochondrial gene expression	4/60	41/9983	0.000101121	0.0332182	0.0321458	Seita.5G341400/Seita.6G218500/Seita.9G204600/Seita.9G204800	4
lightgreen	BP	GO:0000963	mitochondrial RNA processing	3/60	20/9983	0.000218798	0.0479167	0.0463698	Seita.6G218500/Seita.9G204600/Seita.9G204800	3
lightyellow	BP	GO:0042761	very long-chain fatty acid biosynthetic process	5/71	26/9983	9.23931e-07	0.000777026	0.000731364	Seita.3G092300/Seita.3G092600/Seita.3G092700/Seita.3G093000/Seita.7G142600	5
lightyellow	BP	GO:0000038	very long-chain fatty acid metabolic process	5/71	34/9983	3.73957e-06	0.00157249	0.00148008	Seita.3G092300/Seita.3G092600/Seita.3G092700/Seita.3G093000/Seita.7G142600	5
lightyellow	BP	GO:0010030	positive regulation of seed germination	4/71	27/9983	3.64331e-05	0.00839281	0.00789961	Seita.2G053300/Seita.2G053700/Seita.2G053800/Seita.3G112300	4
lightyellow	BP	GO:0010117	photoprotection	3/71	10/9983	3.99182e-05	0.00839281	0.00789961	Seita.2G053300/Seita.2G053700/Seita.2G053800	3
lightyellow	BP	GO:0071484	cellular response to light intensity	3/71	12/9983	7.24388e-05	0.0101867	0.00958804	Seita.2G053300/Seita.2G053700/Seita.2G053800	3
lightyellow	BP	GO:0010345	suberin biosynthetic process	4/71	32/9983	7.26753e-05	0.0101867	0.00958804	Seita.3G092300/Seita.3G092600/Seita.3G092700/Seita.3G093000	4
lightyellow	BP	GO:0071490	cellular response to far red light	3/71	13/9983	9.36904e-05	0.0112562	0.0105948	Seita.2G053300/Seita.2G053700/Seita.2G053800	3
lightyellow	BP	GO:0009644	response to high light intensity	5/71	80/9983	0.000250807	0.026366	0.0248166	Seita.2G053300/Seita.2G053700/Seita.2G053800/Seita.4G099200/Seita.9G389700	5
lightyellow	BP	GO:0006633	fatty acid biosynthetic process	5/71	88/9983	0.000391148	0.0365506	0.0344027	Seita.3G092300/Seita.3G092600/Seita.3G092700/Seita.3G093000/Seita.7G142600	5
lightyellow	BP	GO:0009408	response to heat	7/71	199/9983	0.000508764	0.0408157	0.0384172	Seita.2G053300/Seita.2G053700/Seita.2G053800/Seita.5G448900/Seita.5G450800/Seita.6G116700/Seita.8G046200	7
lightyellow	BP	GO:0008610	lipid biosynthetic process	10/71	404/9983	0.000533856	0.0408157	0.0384172	Seita.3G092300/Seita.3G092600/Seita.3G092700/Seita.3G093000/Seita.3G112300/Seita.5G166000/Seita.5G320500/Seita.6G021900/Seita.7G142600/Seita.9G047500	10
lightyellow	BP	GO:0071483	cellular response to blue light	3/71	24/9983	0.000626848	0.041828	0.03937	Seita.2G053300/Seita.2G053700/Seita.2G053800	3
lightyellow	BP	GO:0010025	wax biosynthetic process	4/71	56/9983	0.000652785	0.041828	0.03937	Seita.3G092300/Seita.3G092600/Seita.3G092700/Seita.3G093000	4
lightyellow	BP	GO:0010166	wax metabolic process	4/71	58/9983	0.000746041	0.041828	0.03937	Seita.3G092300/Seita.3G092600/Seita.3G092700/Seita.3G093000	4
lightyellow	BP	GO:1901570	fatty acid derivative biosynthetic process	4/71	58/9983	0.000746041	0.041828	0.03937	Seita.3G092300/Seita.3G092600/Seita.3G092700/Seita.3G093000	4
lightyellow	BP	GO:0034644	cellular response to UV	3/71	26/9983	0.000797078	0.0418964	0.0394344	Seita.2G053300/Seita.2G053700/Seita.2G053800	3
lightyellow	MF	GO:0080133	midchain alkane hydroxylase activity	4/60	11/8539	7.00654e-07	0.000125417	0.000115792	Seita.3G092300/Seita.3G092600/Seita.3G092700/Seita.3G093000	4
lightyellow	MF	GO:0016713	oxidoreductase activity, acting on paired donors, with incorporation or reduction of molecular oxygen, reduced iron-sulfur protein as one donor, and incorporation of one atom of oxygen	4/60	15/8539	2.83785e-06	0.000253988	0.000234496	Seita.3G092300/Seita.3G092600/Seita.3G092700/Seita.3G093000	4
magenta	MF	GO:0004519	endonuclease activity	18/120	444/8539	4.32938e-05	0.0122088	0.0121223	Seita.1G076000/Seita.1G271900/Seita.2G322600/Seita.4G110200/Seita.5G019700/Seita.5G065900/Seita.5G077400/Seita.6G051400/Seita.6G252200/Seita.7G058100/Seita.7G108300/Seita.7G113000/Seita.9G101600/Seita.9G185600/Seita.9G320800/Seita.9G403900/Seita.9G436400/Seita.9G526500	18
midnightblue	BP	GO:0009451	RNA modification	67/147	492/9983	5.99293e-49	4.68048e-46	4.57355e-46	Seita.1G047500/Seita.1G101600/Seita.1G108300/Seita.1G238500/Seita.2G042500/Seita.2G095100/Seita.2G177900/Seita.2G203300/Seita.2G321700/Seita.2G373100/Seita.2G378900/Seita.2G400300/Seita.2G429600/Seita.3G019500/Seita.3G039300/Seita.3G074200/Seita.3G159700/Seita.3G187700/Seita.3G201600/Seita.3G289900/Seita.3G349700/Seita.4G047400/Seita.4G076900/Seita.4G090100/Seita.4G096700/Seita.4G218400/Seita.4G2…	67
midnightblue	BP	GO:0080156	mitochondrial mRNA modification	6/147	33/9983	7.34338e-06	0.00286759	0.00280208	Seita.1G238500/Seita.4G096700/Seita.5G028800/Seita.7G103600/Seita.7G277600/Seita.9G340100	6
midnightblue	BP	GO:1900864	mitochondrial RNA modification	6/147	39/9983	2.01142e-05	0.00523639	0.00511676	Seita.1G238500/Seita.4G096700/Seita.5G028800/Seita.7G103600/Seita.7G277600/Seita.9G340100	6
midnightblue	BP	GO:0034471	ncRNA 5'-end processing	4/147	15/9983	5.42974e-05	0.00938554	0.00917113	Seita.3G001600/Seita.4G257300/Seita.5G466000/Seita.7G334600	4
midnightblue	BP	GO:0000959	mitochondrial RNA metabolic process	6/147	47/9983	6.00867e-05	0.00938554	0.00917113	Seita.1G238500/Seita.4G096700/Seita.5G028800/Seita.7G103600/Seita.7G277600/Seita.9G340100	6
midnightblue	BP	GO:0016556	mRNA modification	6/147	61/9983	0.000262371	0.0341519	0.0333717	Seita.1G238500/Seita.4G096700/Seita.5G028800/Seita.7G103600/Seita.7G277600/Seita.9G340100	6
midnightblue	MF	GO:0004519	endonuclease activity	70/133	444/8539	2.08924e-55	4.42919e-53	4.26645e-53	Seita.1G047500/Seita.1G101600/Seita.1G108300/Seita.1G192000/Seita.1G238500/Seita.2G095100/Seita.2G177900/Seita.2G203300/Seita.2G321700/Seita.2G373100/Seita.2G378900/Seita.2G400300/Seita.2G429600/Seita.3G001600/Seita.3G019500/Seita.3G039300/Seita.3G074200/Seita.3G159700/Seita.3G201600/Seita.3G289900/Seita.3G349700/Seita.4G047400/Seita.4G076900/Seita.4G090100/Seita.4G096700/Seita.4G218400/Seita.4G2…	70
midnightblue	MF	GO:0140098	catalytic activity, acting on RNA	14/133	299/8539	0.00022056	0.0233793	0.0225203	Seita.1G002700/Seita.1G087700/Seita.1G115500/Seita.1G350700/Seita.2G042500/Seita.2G109600/Seita.3G001600/Seita.3G322400/Seita.4G257300/Seita.5G466000/Seita.6G063200/Seita.8G016800/Seita.9G022600/Seita.9G092100	14
paleturquoise	CC	GO:0036513	Derlin-1 retrotranslocation complex	44202	10/9955	0.00601351	0.0346971	0.0236327	Seita.7G053100	1
paleturquoise	CC	GO:0016324	apical plasma membrane	44202	11/9955	0.0066132	0.0346971	0.0236327	Seita.8G054900	1
paleturquoise	CC	GO:0044449	contractile fiber part	44202	15/9955	0.00900895	0.0346971	0.0236327	Seita.7G053100	1
paleturquoise	CC	GO:0043292	contractile fiber	44202	16/9955	0.00960713	0.0346971	0.0236327	Seita.7G053100	1
paleturquoise	CC	GO:0045177	apical part of cell	44202	17/9955	0.010205	0.0346971	0.0236327	Seita.8G054900	1
pink	BP	GO:0016071	mRNA metabolic process	56/364	349/9983	1.31708e-21	2.22587e-18	1.93958e-18	Seita.1G005500/Seita.1G031800/Seita.1G080100/Seita.1G083500/Seita.1G136100/Seita.1G269100/Seita.2G109900/Seita.2G145500/Seita.2G146700/Seita.2G153600/Seita.2G168400/Seita.2G179200/Seita.2G203900/Seita.2G274200/Seita.2G326100/Seita.2G361400/Seita.2G411500/Seita.2G416900/Seita.3G085100/Seita.3G184700/Seita.3G193600/Seita.3G240400/Seita.3G386500/Seita.4G027700/Seita.4G058100/Seita.5G055200/Seita.5G0…	56
pink	BP	GO:0009451	RNA modification	57/364	492/9983	3.196e-15	2.70062e-12	2.35327e-12	Seita.1G030400/Seita.1G046200/Seita.1G097300/Seita.1G112600/Seita.1G221900/Seita.1G237400/Seita.1G269100/Seita.1G301700/Seita.1G322100/Seita.1G327400/Seita.1G351200/Seita.2G096900/Seita.2G109100/Seita.2G109900/Seita.2G203900/Seita.2G330900/Seita.2G331000/Seita.2G382300/Seita.2G393500/Seita.3G051300/Seita.3G060100/Seita.3G132000/Seita.3G143200/Seita.3G184700/Seita.3G246100/Seita.3G370400/Seita.3G3…	57
pink	BP	GO:0006397	mRNA processing	35/364	216/9983	6.27455e-14	3.53466e-11	3.08003e-11	Seita.1G005500/Seita.1G083500/Seita.1G136100/Seita.2G153600/Seita.2G168400/Seita.2G179200/Seita.2G274200/Seita.2G326100/Seita.2G361400/Seita.2G411500/Seita.2G416900/Seita.3G085100/Seita.3G193600/Seita.3G240400/Seita.3G386500/Seita.4G027700/Seita.4G058100/Seita.5G148400/Seita.5G151700/Seita.5G225200/Seita.5G243700/Seita.6G001200/Seita.6G039800/Seita.6G129000/Seita.6G192400/Seita.7G028600/Seita.8G0…	35
pink	BP	GO:0034660	ncRNA metabolic process	40/364	322/9983	7.02263e-12	2.96706e-09	2.58544e-09	Seita.1G031800/Seita.1G094800/Seita.1G112600/Seita.1G301700/Seita.1G322100/Seita.1G355500/Seita.2G069700/Seita.2G077000/Seita.2G331000/Seita.2G339100/Seita.2G403000/Seita.3G132000/Seita.3G143200/Seita.3G184700/Seita.3G370400/Seita.4G003400/Seita.4G104300/Seita.4G147000/Seita.4G200700/Seita.4G267000/Seita.5G003200/Seita.5G131200/Seita.5G151700/Seita.5G433800/Seita.6G125900/Seita.6G230400/Seita.6G2…	40
pink	BP	GO:0051168	nuclear export	19/364	79/9983	3.54448e-11	1.19803e-08	1.04394e-08	Seita.1G331900/Seita.2G146700/Seita.2G326100/Seita.2G387400/Seita.3G144100/Seita.3G193600/Seita.3G333500/Seita.4G027700/Seita.5G315300/Seita.5G427500/Seita.8G145600/Seita.8G213100/Seita.9G099800/Seita.9G404900/Seita.9G406000/Seita.9G484200/Seita.9G485300/Seita.9G517100/Seita.9G546800	19
pink	BP	GO:0006403	RNA localization	20/364	90/9983	5.06641e-11	1.42704e-08	1.24349e-08	Seita.1G331900/Seita.2G146700/Seita.2G326100/Seita.2G361400/Seita.2G387400/Seita.3G144100/Seita.3G193600/Seita.4G027700/Seita.5G315300/Seita.5G427500/Seita.8G145600/Seita.8G213100/Seita.9G099800/Seita.9G243800/Seita.9G404900/Seita.9G406000/Seita.9G484200/Seita.9G485300/Seita.9G517100/Seita.9G546800	20
pink	BP	GO:0006405	RNA export from nucleus	18/364	75/9983	1.22158e-10	2.94924e-08	2.56991e-08	Seita.1G331900/Seita.2G146700/Seita.2G326100/Seita.2G387400/Seita.3G144100/Seita.3G193600/Seita.4G027700/Seita.5G315300/Seita.5G427500/Seita.8G145600/Seita.8G213100/Seita.9G099800/Seita.9G404900/Seita.9G406000/Seita.9G484200/Seita.9G485300/Seita.9G517100/Seita.9G546800	18
pink	BP	GO:0006325	chromatin organization	37/364	313/9983	1.94953e-10	3.77424e-08	3.28879e-08	Seita.1G005800/Seita.1G092100/Seita.2G168400/Seita.2G227500/Seita.2G227600/Seita.2G274200/Seita.3G024200/Seita.3G040000/Seita.3G121600/Seita.3G122500/Seita.3G193600/Seita.3G345900/Seita.4G083900/Seita.4G112400/Seita.4G200100/Seita.5G133000/Seita.5G198000/Seita.5G259200/Seita.5G263700/Seita.5G355100/Seita.5G433800/Seita.5G464600/Seita.6G059100/Seita.6G118400/Seita.6G244400/Seita.7G123700/Seita.7G1…	37
pink	BP	GO:0050657	nucleic acid transport	18/364	78/9983	2.4566e-10	3.77424e-08	3.28879e-08	Seita.1G331900/Seita.2G146700/Seita.2G326100/Seita.2G387400/Seita.3G144100/Seita.3G193600/Seita.4G027700/Seita.5G315300/Seita.5G427500/Seita.8G145600/Seita.8G213100/Seita.9G099800/Seita.9G404900/Seita.9G406000/Seita.9G484200/Seita.9G485300/Seita.9G517100/Seita.9G546800	18
pink	BP	GO:0050658	RNA transport	18/364	78/9983	2.4566e-10	3.77424e-08	3.28879e-08	Seita.1G331900/Seita.2G146700/Seita.2G326100/Seita.2G387400/Seita.3G144100/Seita.3G193600/Seita.4G027700/Seita.5G315300/Seita.5G427500/Seita.8G145600/Seita.8G213100/Seita.9G099800/Seita.9G404900/Seita.9G406000/Seita.9G484200/Seita.9G485300/Seita.9G517100/Seita.9G546800	18
pink	BP	GO:0051236	establishment of RNA localization	18/364	78/9983	2.4566e-10	3.77424e-08	3.28879e-08	Seita.1G331900/Seita.2G146700/Seita.2G326100/Seita.2G387400/Seita.3G144100/Seita.3G193600/Seita.4G027700/Seita.5G315300/Seita.5G427500/Seita.8G145600/Seita.8G213100/Seita.9G099800/Seita.9G404900/Seita.9G406000/Seita.9G484200/Seita.9G485300/Seita.9G517100/Seita.9G546800	18
pink	BP	GO:0000398	mRNA splicing, via spliceosome	24/364	150/9983	8.33685e-10	1.17411e-07	1.02309e-07	Seita.1G005500/Seita.1G136100/Seita.2G153600/Seita.2G168400/Seita.2G179200/Seita.2G274200/Seita.2G326100/Seita.2G361400/Seita.2G411500/Seita.3G085100/Seita.3G240400/Seita.3G386500/Seita.4G058100/Seita.5G148400/Seita.5G151700/Seita.5G243700/Seita.6G129000/Seita.6G192400/Seita.9G006700/Seita.9G385400/Seita.9G406000/Seita.9G495800/Seita.9G546800/Seita.9G555800	24
pink	BP	GO:0000375	RNA splicing, via transesterification reactions	25/364	165/9983	1.19715e-09	1.5563e-07	1.35613e-07	Seita.1G005500/Seita.1G136100/Seita.2G153600/Seita.2G168400/Seita.2G179200/Seita.2G274200/Seita.2G326100/Seita.2G361400/Seita.2G411500/Seita.3G085100/Seita.3G240400/Seita.3G386500/Seita.4G058100/Seita.5G148400/Seita.5G151700/Seita.5G243700/Seita.6G129000/Seita.6G192400/Seita.9G006700/Seita.9G121600/Seita.9G385400/Seita.9G406000/Seita.9G495800/Seita.9G546800/Seita.9G555800	25
pink	BP	GO:0008380	RNA splicing	28/364	206/9983	1.51893e-09	1.83357e-07	1.59773e-07	Seita.1G005500/Seita.1G030400/Seita.1G046200/Seita.1G136100/Seita.2G069700/Seita.2G153600/Seita.2G168400/Seita.2G179200/Seita.2G274200/Seita.2G326100/Seita.2G361400/Seita.2G411500/Seita.3G085100/Seita.3G240400/Seita.3G386500/Seita.4G058100/Seita.5G148400/Seita.5G151700/Seita.5G243700/Seita.6G129000/Seita.6G192400/Seita.9G006700/Seita.9G121600/Seita.9G385400/Seita.9G406000/Seita.9G495800/Seita.9G5…	28
pink	BP	GO:0006913	nucleocytoplasmic transport	21/364	120/9983	1.82534e-09	1.92802e-07	1.68003e-07	Seita.1G331900/Seita.2G146700/Seita.2G326100/Seita.2G387400/Seita.3G144100/Seita.3G193600/Seita.3G333500/Seita.4G027700/Seita.5G315300/Seita.5G427500/Seita.7G212400/Seita.8G145600/Seita.8G213100/Seita.9G099800/Seita.9G404900/Seita.9G406000/Seita.9G454600/Seita.9G484200/Seita.9G485300/Seita.9G517100/Seita.9G546800	21
pink	BP	GO:0051169	nuclear transport	21/364	120/9983	1.82534e-09	1.92802e-07	1.68003e-07	Seita.1G331900/Seita.2G146700/Seita.2G326100/Seita.2G387400/Seita.3G144100/Seita.3G193600/Seita.3G333500/Seita.4G027700/Seita.5G315300/Seita.5G427500/Seita.7G212400/Seita.8G145600/Seita.8G213100/Seita.9G099800/Seita.9G404900/Seita.9G406000/Seita.9G454600/Seita.9G484200/Seita.9G485300/Seita.9G517100/Seita.9G546800	21
pink	BP	GO:0034470	ncRNA processing	31/364	252/9983	2.37339e-09	2.35943e-07	2.05596e-07	Seita.1G112600/Seita.1G301700/Seita.1G322100/Seita.2G069700/Seita.2G077000/Seita.2G331000/Seita.2G339100/Seita.2G403000/Seita.3G132000/Seita.3G143200/Seita.3G184700/Seita.3G370400/Seita.4G003400/Seita.4G104300/Seita.4G147000/Seita.4G267000/Seita.5G003200/Seita.5G131200/Seita.6G125900/Seita.6G237900/Seita.7G187400/Seita.7G244600/Seita.7G329000/Seita.9G171700/Seita.9G243800/Seita.9G283700/Seita.9G4…	31
pink	BP	GO:0000377	RNA splicing, via transesterification reactions with bulged adenosine as nucleophile	24/364	164/9983	5.29082e-09	4.96749e-07	4.32857e-07	Seita.1G005500/Seita.1G136100/Seita.2G153600/Seita.2G168400/Seita.2G179200/Seita.2G274200/Seita.2G326100/Seita.2G361400/Seita.2G411500/Seita.3G085100/Seita.3G240400/Seita.3G386500/Seita.4G058100/Seita.5G148400/Seita.5G151700/Seita.5G243700/Seita.6G129000/Seita.6G192400/Seita.9G006700/Seita.9G385400/Seita.9G406000/Seita.9G495800/Seita.9G546800/Seita.9G555800	24
pink	BP	GO:0006401	RNA catabolic process	21/364	130/9983	8.16192e-09	7.25982e-07	6.32606e-07	Seita.1G031800/Seita.1G080100/Seita.1G235700/Seita.2G145500/Seita.2G146700/Seita.2G361400/Seita.4G003400/Seita.5G074800/Seita.5G079500/Seita.5G225200/Seita.5G420200/Seita.7G123700/Seita.7G123800/Seita.8G054400/Seita.9G057500/Seita.9G099800/Seita.9G152800/Seita.9G243800/Seita.9G277900/Seita.9G334700/Seita.9G406000	21
pink	BP	GO:0071166	ribonucleoprotein complex localization	15/364	68/9983	1.53113e-08	1.2322e-06	1.07371e-06	Seita.1G331900/Seita.2G146700/Seita.2G326100/Seita.2G387400/Seita.3G193600/Seita.4G027700/Seita.5G315300/Seita.5G427500/Seita.8G145600/Seita.8G213100/Seita.9G099800/Seita.9G404900/Seita.9G406000/Seita.9G485300/Seita.9G517100	15
pink	BP	GO:0071426	ribonucleoprotein complex export from nucleus	15/364	68/9983	1.53113e-08	1.2322e-06	1.07371e-06	Seita.1G331900/Seita.2G146700/Seita.2G326100/Seita.2G387400/Seita.3G193600/Seita.4G027700/Seita.5G315300/Seita.5G427500/Seita.8G145600/Seita.8G213100/Seita.9G099800/Seita.9G404900/Seita.9G406000/Seita.9G485300/Seita.9G517100	15
pink	BP	GO:0031503	protein-containing complex localization	16/364	79/9983	1.86184e-08	1.43023e-06	1.24627e-06	Seita.1G331900/Seita.2G146700/Seita.2G326100/Seita.2G387400/Seita.3G193600/Seita.4G027700/Seita.5G315300/Seita.5G427500/Seita.8G145600/Seita.8G213100/Seita.9G099800/Seita.9G404900/Seita.9G406000/Seita.9G484200/Seita.9G485300/Seita.9G517100	16
pink	BP	GO:0040029	regulation of gene expression, epigenetic	26/364	209/9983	3.86143e-08	2.83731e-06	2.47237e-06	Seita.2G168400/Seita.2G227500/Seita.2G227600/Seita.2G274200/Seita.3G040000/Seita.3G193600/Seita.3G276000/Seita.3G295600/Seita.4G112400/Seita.5G071500/Seita.5G133000/Seita.5G198000/Seita.5G263700/Seita.5G355100/Seita.5G427500/Seita.6G118400/Seita.7G231900/Seita.7G329000/Seita.8G054400/Seita.8G157900/Seita.9G057500/Seita.9G243800/Seita.9G334700/Seita.9G406000/Seita.9G538300/Seita.9G571500	26
pink	BP	GO:0015931	nucleobase-containing compound transport	20/364	130/9983	4.363e-08	3.07228e-06	2.67712e-06	Seita.1G331900/Seita.2G146700/Seita.2G326100/Seita.2G387400/Seita.3G144100/Seita.3G193600/Seita.4G027700/Seita.4G223600/Seita.5G315300/Seita.5G427500/Seita.8G145600/Seita.8G213100/Seita.9G099800/Seita.9G404900/Seita.9G406000/Seita.9G484200/Seita.9G485300/Seita.9G517100/Seita.9G546800/Seita.9G556700	20
pink	BP	GO:0006611	protein export from nucleus	15/364	74/9983	5.15594e-08	3.40957e-06	2.97103e-06	Seita.1G331900/Seita.2G146700/Seita.2G326100/Seita.2G387400/Seita.3G193600/Seita.4G027700/Seita.5G315300/Seita.5G427500/Seita.8G145600/Seita.8G213100/Seita.9G099800/Seita.9G404900/Seita.9G406000/Seita.9G485300/Seita.9G517100	15
pink	BP	GO:0043414	macromolecule methylation	25/364	198/9983	5.28488e-08	3.40957e-06	2.97103e-06	Seita.1G092100/Seita.1G269100/Seita.1G301700/Seita.1G322100/Seita.2G153600/Seita.3G143200/Seita.3G193600/Seita.3G345900/Seita.4G083900/Seita.4G104300/Seita.5G198000/Seita.5G355100/Seita.5G433800/Seita.5G464600/Seita.6G125900/Seita.6G230400/Seita.6G244400/Seita.8G157900/Seita.9G171700/Seita.9G243800/Seita.9G344900/Seita.9G374700/Seita.9G409300/Seita.9G503500/Seita.9G571500	25
pink	BP	GO:0006406	mRNA export from nucleus	12/364	46/9983	5.85074e-08	3.40957e-06	2.97103e-06	Seita.1G331900/Seita.2G146700/Seita.2G326100/Seita.3G193600/Seita.4G027700/Seita.5G315300/Seita.5G427500/Seita.8G213100/Seita.9G099800/Seita.9G404900/Seita.9G406000/Seita.9G485300	12
pink	BP	GO:0051028	mRNA transport	12/364	46/9983	5.85074e-08	3.40957e-06	2.97103e-06	Seita.1G331900/Seita.2G146700/Seita.2G326100/Seita.3G193600/Seita.4G027700/Seita.5G315300/Seita.5G427500/Seita.8G213100/Seita.9G099800/Seita.9G404900/Seita.9G406000/Seita.9G485300	12
pink	BP	GO:0071427	mRNA-containing ribonucleoprotein complex export from nucleus	12/364	46/9983	5.85074e-08	3.40957e-06	2.97103e-06	Seita.1G331900/Seita.2G146700/Seita.2G326100/Seita.3G193600/Seita.4G027700/Seita.5G315300/Seita.5G427500/Seita.8G213100/Seita.9G099800/Seita.9G404900/Seita.9G406000/Seita.9G485300	12
pink	BP	GO:0006402	mRNA catabolic process	17/364	99/9983	8.80309e-08	4.95907e-06	4.32123e-06	Seita.1G031800/Seita.1G080100/Seita.2G145500/Seita.2G146700/Seita.2G361400/Seita.5G074800/Seita.5G225200/Seita.5G420200/Seita.7G123700/Seita.7G123800/Seita.8G054400/Seita.9G057500/Seita.9G099800/Seita.9G152800/Seita.9G243800/Seita.9G334700/Seita.9G406000	17
pink	BP	GO:0016570	histone modification	24/364	194/9983	1.4538e-07	7.92557e-06	6.90618e-06	Seita.1G005800/Seita.1G092100/Seita.3G024200/Seita.3G121600/Seita.3G122500/Seita.3G193600/Seita.3G345900/Seita.4G083900/Seita.4G200100/Seita.5G259200/Seita.5G355100/Seita.5G433800/Seita.5G464600/Seita.6G118400/Seita.6G244400/Seita.7G123700/Seita.7G143400/Seita.7G200700/Seita.8G157900/Seita.9G243800/Seita.9G344900/Seita.9G406600/Seita.9G538300/Seita.9G571500	24
pink	BP	GO:0016569	covalent chromatin modification	24/364	198/9983	2.14117e-07	1.13081e-05	9.85361e-06	Seita.1G005800/Seita.1G092100/Seita.3G024200/Seita.3G121600/Seita.3G122500/Seita.3G193600/Seita.3G345900/Seita.4G083900/Seita.4G200100/Seita.5G259200/Seita.5G355100/Seita.5G433800/Seita.5G464600/Seita.6G118400/Seita.6G244400/Seita.7G123700/Seita.7G143400/Seita.7G200700/Seita.8G157900/Seita.9G243800/Seita.9G344900/Seita.9G406600/Seita.9G538300/Seita.9G571500	24
pink	BP	GO:0016072	rRNA metabolic process	22/364	174/9983	3.31821e-07	1.69933e-05	1.48076e-05	Seita.1G094800/Seita.1G301700/Seita.2G077000/Seita.2G339100/Seita.2G403000/Seita.3G132000/Seita.3G143200/Seita.3G184700/Seita.4G003400/Seita.4G267000/Seita.5G003200/Seita.5G131200/Seita.5G433800/Seita.6G237900/Seita.7G187400/Seita.7G244600/Seita.9G243800/Seita.9G277900/Seita.9G409300/Seita.9G414500/Seita.9G517100/Seita.9G537800	22
pink	BP	GO:0000956	nuclear-transcribed mRNA catabolic process	13/364	64/9983	3.95578e-07	1.96625e-05	1.71335e-05	Seita.1G080100/Seita.2G145500/Seita.2G146700/Seita.2G361400/Seita.5G074800/Seita.5G420200/Seita.8G054400/Seita.9G057500/Seita.9G099800/Seita.9G152800/Seita.9G243800/Seita.9G334700/Seita.9G406000	13
pink	BP	GO:0022613	ribonucleoprotein complex biogenesis	31/364	315/9983	4.35143e-07	2.10112e-05	1.83087e-05	Seita.1G005500/Seita.1G301700/Seita.2G077000/Seita.2G339100/Seita.2G361400/Seita.2G403000/Seita.2G411500/Seita.3G132000/Seita.3G143200/Seita.3G184700/Seita.3G240400/Seita.4G003400/Seita.4G058100/Seita.4G267000/Seita.5G003200/Seita.5G074800/Seita.5G082200/Seita.5G131200/Seita.5G243700/Seita.6G129000/Seita.6G237900/Seita.7G187400/Seita.7G212400/Seita.7G244600/Seita.8G145600/Seita.9G243800/Seita.9G4…	31
pink	BP	GO:0034655	nucleobase-containing compound catabolic process	22/364	182/9983	7.27296e-07	3.41425e-05	2.97511e-05	Seita.1G031800/Seita.1G080100/Seita.1G235700/Seita.2G145500/Seita.2G146700/Seita.2G361400/Seita.4G003400/Seita.5G074800/Seita.5G079500/Seita.5G225200/Seita.5G420200/Seita.7G123700/Seita.7G123800/Seita.8G031400/Seita.8G054400/Seita.9G057500/Seita.9G099800/Seita.9G152800/Seita.9G243800/Seita.9G277900/Seita.9G334700/Seita.9G406000	22
pink	BP	GO:0010501	RNA secondary structure unwinding	12/364	58/9983	9.02879e-07	4.12396e-05	3.59354e-05	Seita.1G374000/Seita.2G403000/Seita.4G167800/Seita.5G079500/Seita.5G114600/Seita.5G197900/Seita.6G145100/Seita.6G237900/Seita.8G030300/Seita.8G239700/Seita.9G121600/Seita.9G428600	12
pink	BP	GO:0031123	RNA 3'-end processing	13/364	69/9983	9.8655e-07	4.38755e-05	3.82322e-05	Seita.1G083500/Seita.2G168400/Seita.2G274200/Seita.2G326100/Seita.2G416900/Seita.4G003400/Seita.5G151700/Seita.5G225200/Seita.6G039800/Seita.7G028600/Seita.7G123800/Seita.9G277900/Seita.9G517100	13
pink	BP	GO:0043631	RNA polyadenylation	9/364	31/9983	1.0212e-06	4.42518e-05	3.85602e-05	Seita.1G083500/Seita.2G168400/Seita.2G274200/Seita.2G416900/Seita.5G151700/Seita.5G225200/Seita.6G039800/Seita.7G028600/Seita.9G277900	9
pink	BP	GO:0010608	posttranscriptional regulation of gene expression	24/364	224/9983	2.06343e-06	8.718e-05	7.59669e-05	Seita.1G031800/Seita.1G355500/Seita.2G145500/Seita.2G146700/Seita.2G227500/Seita.2G227600/Seita.3G276000/Seita.3G295600/Seita.5G071500/Seita.5G074800/Seita.5G079500/Seita.5G225200/Seita.5G427500/Seita.6G118400/Seita.7G123700/Seita.7G185700/Seita.7G329000/Seita.8G054400/Seita.9G006700/Seita.9G025100/Seita.9G152800/Seita.9G334700/Seita.9G385400/Seita.9G406000	24
pink	BP	GO:0001510	RNA methylation	10/364	44/9983	3.00725e-06	0.000122486	0.000106732	Seita.1G269100/Seita.1G301700/Seita.1G322100/Seita.3G143200/Seita.4G104300/Seita.6G125900/Seita.6G230400/Seita.9G171700/Seita.9G374700/Seita.9G409300	10
pink	BP	GO:0006400	tRNA modification	11/364	54/9983	3.04403e-06	0.000122486	0.000106732	Seita.1G112600/Seita.1G322100/Seita.2G331000/Seita.3G132000/Seita.3G184700/Seita.3G370400/Seita.4G104300/Seita.4G147000/Seita.6G125900/Seita.9G171700/Seita.9G283700	11
pink	BP	GO:0006378	mRNA polyadenylation	8/364	27/9983	3.49515e-06	0.000137368	0.000119699	Seita.1G083500/Seita.2G168400/Seita.2G274200/Seita.2G416900/Seita.5G151700/Seita.5G225200/Seita.6G039800/Seita.7G028600	8
pink	BP	GO:0031124	mRNA 3'-end processing	9/364	37/9983	5.19008e-06	0.000199346	0.000173706	Seita.1G083500/Seita.2G168400/Seita.2G274200/Seita.2G326100/Seita.2G416900/Seita.5G151700/Seita.5G225200/Seita.6G039800/Seita.7G028600	9
pink	BP	GO:0006364	rRNA processing	19/364	162/9983	6.56477e-06	0.000246544	0.000214833	Seita.1G301700/Seita.2G077000/Seita.2G339100/Seita.2G403000/Seita.3G132000/Seita.3G143200/Seita.3G184700/Seita.4G003400/Seita.4G267000/Seita.5G003200/Seita.5G131200/Seita.6G237900/Seita.7G187400/Seita.7G244600/Seita.9G243800/Seita.9G409300/Seita.9G414500/Seita.9G517100/Seita.9G537800	19
pink	BP	GO:0016458	gene silencing	21/364	198/9983	1.06018e-05	0.000389502	0.000339404	Seita.2G168400/Seita.2G227500/Seita.2G227600/Seita.2G274200/Seita.3G193600/Seita.3G276000/Seita.3G295600/Seita.5G071500/Seita.5G133000/Seita.5G151700/Seita.5G198000/Seita.5G263700/Seita.5G427500/Seita.6G118400/Seita.7G329000/Seita.8G054400/Seita.8G157900/Seita.9G243800/Seita.9G334700/Seita.9G406000/Seita.9G571500	21
pink	BP	GO:0090501	RNA phosphodiester bond hydrolysis	15/364	114/9983	1.56079e-05	0.00056122	0.000489036	Seita.1G083500/Seita.1G235700/Seita.2G146700/Seita.3G295600/Seita.5G131200/Seita.5G151700/Seita.5G225200/Seita.6G039800/Seita.7G028600/Seita.7G329000/Seita.9G057500/Seita.9G243800/Seita.9G409300/Seita.9G414500/Seita.9G517100	15
pink	BP	GO:0008033	tRNA processing	12/364	76/9983	1.73775e-05	0.000611834	0.00053314	Seita.1G112600/Seita.1G322100/Seita.2G069700/Seita.2G331000/Seita.3G132000/Seita.3G184700/Seita.3G370400/Seita.4G104300/Seita.4G147000/Seita.6G125900/Seita.9G171700/Seita.9G283700	12
pink	BP	GO:0032259	methylation	25/364	274/9983	2.1963e-05	0.000757499	0.000660069	Seita.1G092100/Seita.1G269100/Seita.1G301700/Seita.1G322100/Seita.2G153600/Seita.3G143200/Seita.3G193600/Seita.3G345900/Seita.4G083900/Seita.4G104300/Seita.5G198000/Seita.5G355100/Seita.5G433800/Seita.5G464600/Seita.6G125900/Seita.6G230400/Seita.6G244400/Seita.8G157900/Seita.9G171700/Seita.9G243800/Seita.9G344900/Seita.9G374700/Seita.9G409300/Seita.9G503500/Seita.9G571500	25
pink	BP	GO:0000184	nuclear-transcribed mRNA catabolic process, nonsense-mediated decay	6/364	18/9983	2.88475e-05	0.000975046	0.000849635	Seita.1G080100/Seita.2G146700/Seita.8G054400/Seita.9G099800/Seita.9G334700/Seita.9G406000	6
pink	BP	GO:0007033	vacuole organization	11/364	68/9983	3.08435e-05	0.00102207	0.000890611	Seita.1G351600/Seita.2G353000/Seita.3G375900/Seita.4G061900/Seita.5G225500/Seita.5G262500/Seita.5G275000/Seita.5G337300/Seita.6G091400/Seita.9G116000/Seita.9G189200	11
pink	BP	GO:0030490	maturation of SSU-rRNA	9/364	46/9983	3.43783e-05	0.0011173	0.000973588	Seita.2G077000/Seita.3G132000/Seita.4G267000/Seita.5G003200/Seita.7G187400/Seita.9G409300/Seita.9G414500/Seita.9G517100/Seita.9G537800	9
pink	BP	GO:0006379	mRNA cleavage	6/364	19/9983	4.08743e-05	0.0012975	0.00113062	Seita.1G083500/Seita.5G151700/Seita.5G225200/Seita.6G039800/Seita.7G028600/Seita.7G329000	6
pink	BP	GO:0046907	intracellular transport	36/364	488/9983	4.14587e-05	0.0012975	0.00113062	Seita.1G107900/Seita.1G164100/Seita.1G324900/Seita.1G331900/Seita.1G351600/Seita.2G146700/Seita.2G326100/Seita.2G387400/Seita.3G144100/Seita.3G193600/Seita.3G333500/Seita.4G027700/Seita.4G059100/Seita.4G108600/Seita.5G155700/Seita.5G262500/Seita.5G315300/Seita.5G327200/Seita.5G427500/Seita.6G010900/Seita.6G091400/Seita.6G246200/Seita.7G212400/Seita.8G145600/Seita.8G213100/Seita.9G099800/Seita.9G1…	36
pink	BP	GO:0044270	cellular nitrogen compound catabolic process	22/364	236/9983	4.95989e-05	0.00152404	0.00132802	Seita.1G031800/Seita.1G080100/Seita.1G235700/Seita.2G145500/Seita.2G146700/Seita.2G361400/Seita.4G003400/Seita.5G074800/Seita.5G079500/Seita.5G225200/Seita.5G420200/Seita.7G123700/Seita.7G123800/Seita.8G031400/Seita.8G054400/Seita.9G057500/Seita.9G099800/Seita.9G152800/Seita.9G243800/Seita.9G277900/Seita.9G334700/Seita.9G406000	22
pink	BP	GO:0046700	heterocycle catabolic process	22/364	237/9983	5.28769e-05	0.00159575	0.0013905	Seita.1G031800/Seita.1G080100/Seita.1G235700/Seita.2G145500/Seita.2G146700/Seita.2G361400/Seita.4G003400/Seita.5G074800/Seita.5G079500/Seita.5G225200/Seita.5G420200/Seita.7G123700/Seita.7G123800/Seita.8G031400/Seita.8G054400/Seita.9G057500/Seita.9G099800/Seita.9G152800/Seita.9G243800/Seita.9G277900/Seita.9G334700/Seita.9G406000	22
pink	BP	GO:0006399	tRNA metabolic process	15/364	129/9983	6.81529e-05	0.00202067	0.00176077	Seita.1G112600/Seita.1G322100/Seita.1G355500/Seita.2G069700/Seita.2G331000/Seita.3G132000/Seita.3G184700/Seita.3G370400/Seita.4G104300/Seita.4G147000/Seita.4G200700/Seita.6G125900/Seita.9G171700/Seita.9G277900/Seita.9G283700	15
pink	BP	GO:0045184	establishment of protein localization	32/364	428/9983	8.74504e-05	0.00254812	0.00222038	Seita.1G107900/Seita.1G324900/Seita.1G331900/Seita.1G351600/Seita.2G043600/Seita.2G146700/Seita.2G326100/Seita.2G387400/Seita.2G442800/Seita.3G144100/Seita.3G193600/Seita.4G027700/Seita.4G059100/Seita.4G217000/Seita.5G079500/Seita.5G155700/Seita.5G315300/Seita.5G327200/Seita.5G427500/Seita.6G246200/Seita.7G212400/Seita.8G145600/Seita.8G213100/Seita.9G099800/Seita.9G274600/Seita.9G404900/Seita.9G4…	32
pink	BP	GO:0006259	DNA metabolic process	35/364	489/9983	9.79313e-05	0.00280515	0.00244435	Seita.1G001500/Seita.2G146700/Seita.2G153600/Seita.2G300700/Seita.2G411500/Seita.3G001300/Seita.3G059200/Seita.3G122500/Seita.3G193600/Seita.3G273900/Seita.5G079500/Seita.5G097300/Seita.5G099900/Seita.5G198000/Seita.5G274300/Seita.5G324100/Seita.5G331500/Seita.5G395700/Seita.5G414800/Seita.5G464600/Seita.6G059100/Seita.7G028700/Seita.7G035100/Seita.7G123700/Seita.7G123800/Seita.7G200700/Seita.8G1…	35
pink	BP	GO:0035196	production of miRNAs involved in gene silencing by miRNA	7/364	31/9983	9.9682e-05	0.00280771	0.00244658	Seita.2G227500/Seita.2G227600/Seita.3G276000/Seita.5G071500/Seita.5G427500/Seita.7G329000/Seita.9G406000	7
pink	BP	GO:0015031	protein transport	31/364	417/9983	0.000125394	0.00347403	0.0030272	Seita.1G107900/Seita.1G324900/Seita.1G331900/Seita.1G351600/Seita.2G146700/Seita.2G326100/Seita.2G387400/Seita.2G442800/Seita.3G144100/Seita.3G193600/Seita.4G027700/Seita.4G059100/Seita.4G217000/Seita.5G079500/Seita.5G155700/Seita.5G315300/Seita.5G327200/Seita.5G427500/Seita.6G246200/Seita.7G212400/Seita.8G145600/Seita.8G213100/Seita.9G099800/Seita.9G274600/Seita.9G404900/Seita.9G406000/Seita.9G4…	31
pink	BP	GO:0031047	gene silencing by RNA	13/364	107/9983	0.000132169	0.00360266	0.00313928	Seita.2G168400/Seita.2G227500/Seita.2G227600/Seita.2G274200/Seita.3G276000/Seita.3G295600/Seita.5G071500/Seita.5G151700/Seita.5G198000/Seita.5G427500/Seita.7G329000/Seita.9G243800/Seita.9G406000	13
pink	BP	GO:0006886	intracellular protein transport	28/364	362/9983	0.000137668	0.00369299	0.00321799	Seita.1G107900/Seita.1G324900/Seita.1G331900/Seita.1G351600/Seita.2G146700/Seita.2G326100/Seita.2G387400/Seita.3G144100/Seita.3G193600/Seita.4G027700/Seita.4G059100/Seita.5G155700/Seita.5G315300/Seita.5G327200/Seita.5G427500/Seita.6G246200/Seita.7G212400/Seita.8G145600/Seita.8G213100/Seita.9G099800/Seita.9G274600/Seita.9G404900/Seita.9G406000/Seita.9G454600/Seita.9G484200/Seita.9G485300/Seita.9G5…	28
pink	BP	GO:0019439	aromatic compound catabolic process	22/364	254/9983	0.000147421	0.00389283	0.00339213	Seita.1G031800/Seita.1G080100/Seita.1G235700/Seita.2G145500/Seita.2G146700/Seita.2G361400/Seita.4G003400/Seita.5G074800/Seita.5G079500/Seita.5G225200/Seita.5G420200/Seita.7G123700/Seita.7G123800/Seita.8G031400/Seita.8G054400/Seita.9G057500/Seita.9G099800/Seita.9G152800/Seita.9G243800/Seita.9G277900/Seita.9G334700/Seita.9G406000	22
pink	BP	GO:0070727	cellular macromolecule localization	34/364	483/9983	0.000169963	0.00441904	0.00385066	Seita.1G107900/Seita.1G324900/Seita.1G331900/Seita.1G351600/Seita.2G043600/Seita.2G146700/Seita.2G326100/Seita.2G361400/Seita.2G387400/Seita.3G122500/Seita.3G144100/Seita.3G193600/Seita.4G027700/Seita.4G059100/Seita.5G155700/Seita.5G315300/Seita.5G327200/Seita.5G427500/Seita.6G246200/Seita.7G212400/Seita.8G145600/Seita.8G213100/Seita.9G099800/Seita.9G189200/Seita.9G243800/Seita.9G274600/Seita.9G4…	34
pink	BP	GO:0000460	maturation of 5.8S rRNA	7/364	34/9983	0.000185576	0.00475186	0.00414067	Seita.2G077000/Seita.3G143200/Seita.4G003400/Seita.5G131200/Seita.9G243800/Seita.9G409300/Seita.9G517100	7
pink	BP	GO:0032786	positive regulation of DNA-templated transcription, elongation	5/364	16/9983	0.000196388	0.00495367	0.00431653	Seita.1G331900/Seita.1G351600/Seita.2G002800/Seita.3G193600/Seita.3G345900	5
pink	BP	GO:0018205	peptidyl-lysine modification	17/364	175/9983	0.000216898	0.00533072	0.00464508	Seita.2G043600/Seita.3G121600/Seita.3G122500/Seita.3G193600/Seita.3G345900/Seita.4G083900/Seita.4G200100/Seita.5G259200/Seita.5G433800/Seita.5G464600/Seita.7G123700/Seita.7G143400/Seita.8G157900/Seita.9G145100/Seita.9G243800/Seita.9G344900/Seita.9G571500	17
pink	BP	GO:0015833	peptide transport	31/364	430/9983	0.000217645	0.00533072	0.00464508	Seita.1G107900/Seita.1G324900/Seita.1G331900/Seita.1G351600/Seita.2G146700/Seita.2G326100/Seita.2G387400/Seita.2G442800/Seita.3G144100/Seita.3G193600/Seita.4G027700/Seita.4G059100/Seita.4G217000/Seita.5G079500/Seita.5G155700/Seita.5G315300/Seita.5G327200/Seita.5G427500/Seita.6G246200/Seita.7G212400/Seita.8G145600/Seita.8G213100/Seita.9G099800/Seita.9G274600/Seita.9G404900/Seita.9G406000/Seita.9G4…	31
pink	BP	GO:0018193	peptidyl-amino acid modification	29/364	392/9983	0.000225546	0.00544532	0.00474494	Seita.1G043300/Seita.1G092100/Seita.2G043600/Seita.3G121600/Seita.3G122500/Seita.3G193600/Seita.3G236900/Seita.3G345900/Seita.4G083900/Seita.4G200100/Seita.4G217000/Seita.5G061000/Seita.5G156400/Seita.5G259200/Seita.5G423700/Seita.5G433800/Seita.5G464600/Seita.6G244400/Seita.7G123700/Seita.7G143400/Seita.8G157900/Seita.8G158100/Seita.9G099800/Seita.9G119100/Seita.9G145100/Seita.9G224600/Seita.9G2…	29
pink	BP	GO:0042274	ribosomal small subunit biogenesis	9/364	59/9983	0.00025815	0.0061447	0.00535436	Seita.2G077000/Seita.3G132000/Seita.4G267000/Seita.5G003200/Seita.7G187400/Seita.9G409300/Seita.9G414500/Seita.9G517100/Seita.9G537800	9
pink	BP	GO:1901361	organic cyclic compound catabolic process	22/364	268/9983	0.000316228	0.00742258	0.00646788	Seita.1G031800/Seita.1G080100/Seita.1G235700/Seita.2G145500/Seita.2G146700/Seita.2G361400/Seita.4G003400/Seita.5G074800/Seita.5G079500/Seita.5G225200/Seita.5G420200/Seita.7G123700/Seita.7G123800/Seita.8G031400/Seita.8G054400/Seita.9G057500/Seita.9G099800/Seita.9G152800/Seita.9G243800/Seita.9G277900/Seita.9G334700/Seita.9G406000	22
pink	BP	GO:0034613	cellular protein localization	31/364	440/9983	0.000325762	0.00754161	0.0065716	Seita.1G107900/Seita.1G324900/Seita.1G331900/Seita.1G351600/Seita.2G043600/Seita.2G146700/Seita.2G326100/Seita.2G387400/Seita.3G122500/Seita.3G144100/Seita.3G193600/Seita.4G027700/Seita.4G059100/Seita.5G155700/Seita.5G315300/Seita.5G327200/Seita.5G427500/Seita.6G246200/Seita.7G212400/Seita.8G145600/Seita.8G213100/Seita.9G099800/Seita.9G189200/Seita.9G274600/Seita.9G404900/Seita.9G406000/Seita.9G4…	31
pink	BP	GO:0009581	detection of external stimulus	6/364	27/9983	0.000348212	0.00784637	0.00683717	Seita.2G353000/Seita.4G017600/Seita.4G217000/Seita.6G000400/Seita.6G010900/Seita.9G015500	6
pink	BP	GO:0009582	detection of abiotic stimulus	6/364	27/9983	0.000348212	0.00784637	0.00683717	Seita.2G353000/Seita.4G017600/Seita.4G217000/Seita.6G000400/Seita.6G010900/Seita.9G015500	6
pink	BP	GO:0042254	ribosome biogenesis	21/364	256/9983	0.000435238	0.00967833	0.0084335	Seita.1G301700/Seita.2G077000/Seita.2G339100/Seita.2G403000/Seita.3G132000/Seita.3G143200/Seita.3G184700/Seita.4G003400/Seita.4G267000/Seita.5G003200/Seita.5G131200/Seita.6G237900/Seita.7G187400/Seita.7G212400/Seita.7G244600/Seita.8G145600/Seita.9G243800/Seita.9G409300/Seita.9G414500/Seita.9G517100/Seita.9G537800	21
pink	BP	GO:0000462	maturation of SSU-rRNA from tricistronic rRNA transcript (SSU-rRNA, 5.8S rRNA, LSU-rRNA)	7/364	39/9983	0.000453551	0.0098777	0.00860723	Seita.2G077000/Seita.4G267000/Seita.5G003200/Seita.7G187400/Seita.9G409300/Seita.9G414500/Seita.9G517100	7
pink	BP	GO:0042886	amide transport	31/364	449/9983	0.000461468	0.0098777	0.00860723	Seita.1G107900/Seita.1G324900/Seita.1G331900/Seita.1G351600/Seita.2G146700/Seita.2G326100/Seita.2G387400/Seita.2G442800/Seita.3G144100/Seita.3G193600/Seita.4G027700/Seita.4G059100/Seita.4G217000/Seita.5G079500/Seita.5G155700/Seita.5G315300/Seita.5G327200/Seita.5G427500/Seita.6G246200/Seita.7G212400/Seita.8G145600/Seita.8G213100/Seita.9G099800/Seita.9G274600/Seita.9G404900/Seita.9G406000/Seita.9G4…	31
pink	BP	GO:0016571	histone methylation	12/364	106/9983	0.000461739	0.0098777	0.00860723	Seita.1G092100/Seita.3G193600/Seita.3G345900/Seita.4G083900/Seita.5G355100/Seita.5G433800/Seita.5G464600/Seita.6G244400/Seita.8G157900/Seita.9G243800/Seita.9G344900/Seita.9G571500	12
pink	BP	GO:0001701	in utero embryonic development	4/364	11/9983	0.000467996	0.00988642	0.00861483	Seita.2G411500/Seita.3G345900/Seita.4G217000/Seita.9G152800	4
pink	BP	GO:0000245	spliceosomal complex assembly	5/364	19/9983	0.000477614	0.00996504	0.00868333	Seita.1G005500/Seita.3G240400/Seita.5G243700/Seita.6G129000/Seita.9G495800	5
pink	BP	GO:0006606	protein import into nucleus	8/364	52/9983	0.00053403	0.0108736	0.00947505	Seita.3G144100/Seita.5G315300/Seita.7G212400/Seita.8G213100/Seita.9G404900/Seita.9G454600/Seita.9G484200/Seita.9G485300	8
pink	BP	GO:0051170	import into nucleus	8/364	52/9983	0.00053403	0.0108736	0.00947505	Seita.3G144100/Seita.5G315300/Seita.7G212400/Seita.8G213100/Seita.9G404900/Seita.9G454600/Seita.9G484200/Seita.9G485300	8
pink	BP	GO:0043009	chordate embryonic development	5/364	20/9983	0.000617949	0.0123705	0.0107794	Seita.2G411500/Seita.3G345900/Seita.4G217000/Seita.5G275000/Seita.9G152800	5
pink	BP	GO:0034622	cellular protein-containing complex assembly	29/364	417/9983	0.000625807	0.0123705	0.0107794	Seita.1G005500/Seita.1G123300/Seita.1G301700/Seita.2G201800/Seita.2G353000/Seita.2G361400/Seita.2G411500/Seita.3G240400/Seita.4G058100/Seita.4G200100/Seita.4G217000/Seita.5G073300/Seita.5G074800/Seita.5G082200/Seita.5G133000/Seita.5G195900/Seita.5G228000/Seita.5G243700/Seita.5G262500/Seita.5G395700/Seita.6G129000/Seita.7G123700/Seita.7G231900/Seita.8G213100/Seita.9G404900/Seita.9G468000/Seita.9G4…	29
pink	BP	GO:0009792	embryo development ending in birth or egg hatching	6/364	30/9983	0.000636826	0.0123705	0.0107794	Seita.2G411500/Seita.3G345900/Seita.4G217000/Seita.5G275000/Seita.9G152800/Seita.9G168400	6
pink	BP	GO:1905037	autophagosome organization	6/364	30/9983	0.000636826	0.0123705	0.0107794	Seita.3G375900/Seita.5G225500/Seita.5G275000/Seita.5G337300/Seita.6G091400/Seita.9G189200	6
pink	BP	GO:0051052	regulation of DNA metabolic process	13/364	126/9983	0.000668049	0.0128296	0.0111794	Seita.2G153600/Seita.3G001300/Seita.3G122500/Seita.3G193600/Seita.5G079500/Seita.5G198000/Seita.5G324100/Seita.5G464600/Seita.7G200700/Seita.9G099800/Seita.9G243800/Seita.9G473000/Seita.9G476300	13
pink	BP	GO:0034504	protein localization to nucleus	9/364	67/9983	0.000679834	0.0129092	0.0112488	Seita.3G122500/Seita.3G144100/Seita.5G315300/Seita.7G212400/Seita.8G213100/Seita.9G404900/Seita.9G454600/Seita.9G484200/Seita.9G485300	9
pink	BP	GO:0060968	regulation of gene silencing	8/364	54/9983	0.000693007	0.0130131	0.0113394	Seita.2G227500/Seita.2G227600/Seita.5G133000/Seita.5G151700/Seita.5G198000/Seita.5G263700/Seita.8G054400/Seita.8G157900	8
pink	BP	GO:0045944	positive regulation of transcription by RNA polymerase II	13/364	128/9983	0.000775871	0.0141501	0.0123301	Seita.1G351600/Seita.2G002800/Seita.2G201800/Seita.3G193600/Seita.3G254700/Seita.3G345900/Seita.4G200100/Seita.5G079500/Seita.5G247800/Seita.5G263700/Seita.6G192400/Seita.7G231900/Seita.9G505200	13
pink	BP	GO:0000291	nuclear-transcribed mRNA catabolic process, exonucleolytic	5/364	21/9983	0.000787047	0.0141501	0.0123301	Seita.1G080100/Seita.5G420200/Seita.8G054400/Seita.9G057500/Seita.9G334700	5
pink	BP	GO:0006360	transcription by RNA polymerase I	5/364	21/9983	0.000787047	0.0141501	0.0123301	Seita.1G094800/Seita.4G217700/Seita.5G433800/Seita.7G187400/Seita.9G206500	5
pink	BP	GO:0032784	regulation of DNA-templated transcription, elongation	5/364	21/9983	0.000787047	0.0141501	0.0123301	Seita.1G331900/Seita.1G351600/Seita.2G002800/Seita.3G193600/Seita.3G345900	5
pink	BP	GO:0080135	regulation of cellular response to stress	10/364	83/9983	0.000833311	0.0147595	0.0128612	Seita.2G043600/Seita.2G227500/Seita.2G227600/Seita.3G150100/Seita.5G198000/Seita.5G247800/Seita.5G324100/Seita.7G231900/Seita.9G099800/Seita.9G473000	10
pink	BP	GO:0035195	gene silencing by miRNA	7/364	43/9983	0.000838412	0.0147595	0.0128612	Seita.2G227500/Seita.2G227600/Seita.3G276000/Seita.5G071500/Seita.5G427500/Seita.7G329000/Seita.9G406000	7
pink	BP	GO:0016441	posttranscriptional gene silencing	11/364	98/9983	0.000849378	0.0147984	0.0128951	Seita.2G227500/Seita.2G227600/Seita.3G276000/Seita.3G295600/Seita.5G071500/Seita.5G427500/Seita.6G118400/Seita.7G329000/Seita.8G054400/Seita.9G334700/Seita.9G406000	11
pink	BP	GO:0000972	transcription-dependent tethering of RNA polymerase II gene DNA at nuclear periphery	4/364	13/9983	0.000956812	0.0165001	0.0143779	Seita.3G144100/Seita.8G213100/Seita.9G484200/Seita.9G485300	4
pink	BP	GO:0000466	maturation of 5.8S rRNA from tricistronic rRNA transcript (SSU-rRNA, 5.8S rRNA, LSU-rRNA)	5/364	22/9983	0.000988404	0.0168728	0.0147026	Seita.2G077000/Seita.3G143200/Seita.5G131200/Seita.9G409300/Seita.9G517100	5
pink	BP	GO:0070988	demethylation	6/364	33/9983	0.00108322	0.0183064	0.0159518	Seita.1G005800/Seita.3G024200/Seita.4G027700/Seita.5G274300/Seita.9G406600/Seita.9G538300	6
pink	BP	GO:0006479	protein methylation	12/364	117/9983	0.00112354	0.0186154	0.0162211	Seita.1G092100/Seita.3G193600/Seita.3G345900/Seita.4G083900/Seita.5G355100/Seita.5G433800/Seita.5G464600/Seita.6G244400/Seita.8G157900/Seita.9G243800/Seita.9G344900/Seita.9G571500	12
pink	BP	GO:0008213	protein alkylation	12/364	117/9983	0.00112354	0.0186154	0.0162211	Seita.1G092100/Seita.3G193600/Seita.3G345900/Seita.4G083900/Seita.5G355100/Seita.5G433800/Seita.5G464600/Seita.6G244400/Seita.8G157900/Seita.9G243800/Seita.9G344900/Seita.9G571500	12
pink	BP	GO:1902275	regulation of chromatin organization	9/364	72/9983	0.00115343	0.0189252	0.0164911	Seita.3G193600/Seita.3G345900/Seita.5G133000/Seita.5G198000/Seita.5G263700/Seita.6G244400/Seita.7G123700/Seita.8G157900/Seita.9G243800	9
pink	BP	GO:0051172	negative regulation of nitrogen compound metabolic process	31/364	476/9983	0.00121345	0.0197185	0.0171823	Seita.1G031800/Seita.1G094800/Seita.1G355500/Seita.2G043600/Seita.2G168400/Seita.2G274200/Seita.3G024200/Seita.3G122500/Seita.3G193600/Seita.3G321500/Seita.3G345900/Seita.5G074800/Seita.5G079500/Seita.5G133000/Seita.5G151700/Seita.5G198000/Seita.5G225200/Seita.5G263700/Seita.5G433800/Seita.6G113000/Seita.6G192400/Seita.7G123700/Seita.7G185700/Seita.8G091200/Seita.8G157900/Seita.9G006700/Seita.9G1…	31
pink	BP	GO:0000288	nuclear-transcribed mRNA catabolic process, deadenylation-dependent decay	6/364	34/9983	0.00127557	0.0205306	0.0178899	Seita.1G080100/Seita.2G145500/Seita.5G420200/Seita.8G054400/Seita.9G152800/Seita.9G334700	6
pink	BP	GO:0006413	translational initiation	7/364	47/9983	0.00144419	0.0230252	0.0200637	Seita.2G145500/Seita.2G253000/Seita.3G122000/Seita.4G159900/Seita.5G082200/Seita.7G005400/Seita.8G145600	7
pink	BP	GO:1903311	regulation of mRNA metabolic process	9/364	75/9983	0.00154668	0.0244035	0.0212648	Seita.1G031800/Seita.2G145500/Seita.3G193600/Seita.5G225200/Seita.5G243700/Seita.6G192400/Seita.7G123700/Seita.7G185700/Seita.9G385400	9
pink	BP	GO:0071826	ribonucleoprotein complex subunit organization	13/364	138/9983	0.00155952	0.0244035	0.0212648	Seita.1G005500/Seita.1G301700/Seita.2G361400/Seita.2G411500/Seita.3G240400/Seita.3G386500/Seita.4G058100/Seita.5G074800/Seita.5G082200/Seita.5G243700/Seita.6G129000/Seita.9G495800/Seita.9G517100	13
pink	BP	GO:0032968	positive regulation of transcription elongation from RNA polymerase II promoter	4/364	15/9983	0.00172389	0.0264851	0.0230786	Seita.1G351600/Seita.2G002800/Seita.3G193600/Seita.3G345900	4
pink	BP	GO:0043928	exonucleolytic nuclear-transcribed mRNA catabolic process involved in deadenylation-dependent decay	4/364	15/9983	0.00172389	0.0264851	0.0230786	Seita.1G080100/Seita.5G420200/Seita.8G054400/Seita.9G334700	4
pink	BP	GO:0016236	macroautophagy	7/364	49/9983	0.00185332	0.0282173	0.0245879	Seita.1G351600/Seita.3G375900/Seita.5G225500/Seita.5G275000/Seita.5G337300/Seita.6G091400/Seita.9G189200	7
pink	BP	GO:0033044	regulation of chromosome organization	12/364	125/9983	0.00199093	0.0300417	0.0261777	Seita.3G122500/Seita.3G193600/Seita.3G345900/Seita.5G079500/Seita.5G133000/Seita.5G198000/Seita.5G263700/Seita.6G244400/Seita.7G123700/Seita.8G157900/Seita.9G099800/Seita.9G243800	12
pink	BP	GO:0042981	regulation of apoptotic process	8/364	65/9983	0.00237483	0.0355173	0.0309491	Seita.1G094800/Seita.2G043600/Seita.3G150100/Seita.4G262600/Seita.5G011900/Seita.5G275000/Seita.7G123700/Seita.7G123800	8
pink	BP	GO:0034968	histone lysine methylation	9/364	81/9983	0.00265392	0.0393432	0.0342828	Seita.3G193600/Seita.3G345900/Seita.4G083900/Seita.5G433800/Seita.5G464600/Seita.8G157900/Seita.9G243800/Seita.9G344900/Seita.9G571500	9
pink	BP	GO:0030488	tRNA methylation	4/364	17/9983	0.00283708	0.0416928	0.0363302	Seita.1G322100/Seita.4G104300/Seita.6G125900/Seita.9G171700	4
pink	BP	GO:0031050	dsRNA processing	8/364	68/9983	0.00316447	0.045709	0.0398299	Seita.2G227500/Seita.2G227600/Seita.3G276000/Seita.3G295600/Seita.5G071500/Seita.5G427500/Seita.7G329000/Seita.9G406000	8
pink	BP	GO:0070918	production of small RNA involved in gene silencing by RNA	8/364	68/9983	0.00316447	0.045709	0.0398299	Seita.2G227500/Seita.2G227600/Seita.3G276000/Seita.3G295600/Seita.5G071500/Seita.5G427500/Seita.7G329000/Seita.9G406000	8
pink	BP	GO:0007623	circadian rhythm	11/364	116/9983	0.00333014	0.047493	0.0413845	Seita.1G094800/Seita.1G177000/Seita.1G236100/Seita.1G301300/Seita.2G175000/Seita.3G386500/Seita.4G017600/Seita.6G000400/Seita.7G185700/Seita.7G212900/Seita.9G015500	11
pink	BP	GO:0022618	ribonucleoprotein complex assembly	12/364	133/9983	0.00334418	0.047493	0.0413845	Seita.1G005500/Seita.1G301700/Seita.2G361400/Seita.2G411500/Seita.3G240400/Seita.4G058100/Seita.5G074800/Seita.5G082200/Seita.5G243700/Seita.6G129000/Seita.9G495800/Seita.9G517100	12
pink	BP	GO:0000479	endonucleolytic cleavage of tricistronic rRNA transcript (SSU-rRNA, 5.8S rRNA, LSU-rRNA)	4/364	18/9983	0.00354405	0.0494796	0.0431155	Seita.5G131200/Seita.9G409300/Seita.9G414500/Seita.9G517100	4
pink	BP	GO:0048511	rhythmic process	11/364	117/9983	0.00355913	0.0494796	0.0431155	Seita.1G094800/Seita.1G177000/Seita.1G236100/Seita.1G301300/Seita.2G175000/Seita.3G386500/Seita.4G017600/Seita.6G000400/Seita.7G185700/Seita.7G212900/Seita.9G015500	11
pink	BP	GO:0072594	establishment of protein localization to organelle	17/364	225/9983	0.0035719	0.0494796	0.0431155	Seita.1G107900/Seita.1G324900/Seita.1G351600/Seita.3G144100/Seita.4G059100/Seita.5G155700/Seita.5G315300/Seita.5G327200/Seita.6G246200/Seita.7G212400/Seita.8G213100/Seita.9G274600/Seita.9G404900/Seita.9G454600/Seita.9G484200/Seita.9G485300/Seita.9G547400	17
pink	CC	GO:0005730	nucleolus	51/370	436/9955	1.6141e-13	4.39036e-11	3.51704e-11	Seita.1G094800/Seita.1G301700/Seita.1G320000/Seita.1G374000/Seita.2G055300/Seita.2G077000/Seita.2G114800/Seita.2G403000/Seita.2G442800/Seita.3G122500/Seita.3G132000/Seita.3G143200/Seita.3G150100/Seita.3G184700/Seita.3G345900/Seita.3G386500/Seita.4G113800/Seita.4G167800/Seita.4G217700/Seita.4G267000/Seita.5G003200/Seita.5G114600/Seita.5G133000/Seita.5G197900/Seita.5G225200/Seita.5G274300/Seita.5G3…	51
pink	CC	GO:1990904	ribonucleoprotein complex	51/370	493/9955	1.84001e-11	2.50242e-09	2.00465e-09	Seita.1G005500/Seita.1G031800/Seita.1G136100/Seita.1G355500/Seita.2G055300/Seita.2G077000/Seita.2G146700/Seita.2G153600/Seita.2G179200/Seita.2G234200/Seita.2G326100/Seita.2G361400/Seita.2G411500/Seita.3G085100/Seita.3G122000/Seita.3G122500/Seita.3G132000/Seita.3G143200/Seita.3G184700/Seita.3G240400/Seita.3G295600/Seita.3G386500/Seita.4G058100/Seita.4G267000/Seita.5G003200/Seita.5G011900/Seita.5G0…	51
pink	CC	GO:0005681	spliceosomal complex	21/370	96/9955	3.25811e-11	2.95402e-09	2.36642e-09	Seita.1G005500/Seita.1G136100/Seita.2G179200/Seita.2G326100/Seita.2G361400/Seita.2G411500/Seita.3G085100/Seita.3G240400/Seita.3G386500/Seita.4G058100/Seita.5G011900/Seita.5G148400/Seita.5G243700/Seita.6G129000/Seita.6G192400/Seita.6G244400/Seita.9G121600/Seita.9G374100/Seita.9G495800/Seita.9G546800/Seita.9G555800	21
pink	CC	GO:0005684	U2-type spliceosomal complex	13/370	43/9955	2.78517e-09	1.89392e-07	1.51719e-07	Seita.2G179200/Seita.2G361400/Seita.2G411500/Seita.3G085100/Seita.3G240400/Seita.3G386500/Seita.4G058100/Seita.5G243700/Seita.6G129000/Seita.9G374100/Seita.9G495800/Seita.9G546800/Seita.9G555800	13
pink	CC	GO:0071013	catalytic step 2 spliceosome	13/370	44/9955	3.82171e-09	2.07901e-07	1.66546e-07	Seita.1G005500/Seita.2G326100/Seita.2G411500/Seita.3G085100/Seita.3G240400/Seita.3G386500/Seita.4G058100/Seita.5G243700/Seita.6G192400/Seita.6G244400/Seita.9G121600/Seita.9G374100/Seita.9G555800	13
pink	CC	GO:1990234	transferase complex	37/370	404/9955	3.23324e-07	1.46574e-05	1.17418e-05	Seita.1G059400/Seita.1G269100/Seita.1G351600/Seita.2G002800/Seita.2G114800/Seita.2G162700/Seita.2G201800/Seita.2G232700/Seita.2G291200/Seita.3G040000/Seita.3G121600/Seita.3G122500/Seita.3G144100/Seita.3G174400/Seita.3G254700/Seita.3G345900/Seita.4G104300/Seita.4G200100/Seita.4G217700/Seita.4G262600/Seita.4G267000/Seita.5G003200/Seita.5G097300/Seita.5G155700/Seita.5G259200/Seita.5G423700/Seita.6G0…	37
pink	CC	GO:0044427	chromosomal part	31/370	316/9955	7.07302e-07	2.39548e-05	1.91898e-05	Seita.1G005800/Seita.1G278400/Seita.2G168400/Seita.2G232700/Seita.2G274200/Seita.2G300700/Seita.3G043900/Seita.3G121600/Seita.3G122500/Seita.3G193600/Seita.3G386500/Seita.4G083900/Seita.4G112400/Seita.5G028100/Seita.5G133000/Seita.5G228000/Seita.5G259200/Seita.5G355100/Seita.5G395700/Seita.5G414800/Seita.5G420200/Seita.6G059100/Seita.6G192400/Seita.6G255600/Seita.7G035100/Seita.7G200700/Seita.8G1…	31
pink	CC	GO:0005694	chromosome	34/370	367/9955	7.67021e-07	2.39548e-05	1.91898e-05	Seita.1G005800/Seita.1G278400/Seita.1G331900/Seita.2G168400/Seita.2G232700/Seita.2G274200/Seita.2G300700/Seita.3G043900/Seita.3G121600/Seita.3G122500/Seita.3G193600/Seita.3G386500/Seita.4G083900/Seita.4G112400/Seita.4G217000/Seita.5G028100/Seita.5G060500/Seita.5G133000/Seita.5G228000/Seita.5G259200/Seita.5G355100/Seita.5G395700/Seita.5G414800/Seita.5G420200/Seita.6G059100/Seita.6G192400/Seita.6G2…	34
pink	CC	GO:0071010	prespliceosome	7/370	16/9955	7.92621e-07	2.39548e-05	1.91898e-05	Seita.2G179200/Seita.2G411500/Seita.3G240400/Seita.5G243700/Seita.6G129000/Seita.9G495800/Seita.9G546800	7
pink	CC	GO:0000785	chromatin	20/370	158/9955	1.51519e-06	4.1213e-05	3.30151e-05	Seita.1G005800/Seita.1G278400/Seita.2G168400/Seita.2G232700/Seita.2G274200/Seita.3G043900/Seita.3G121600/Seita.3G122500/Seita.3G193600/Seita.4G083900/Seita.4G112400/Seita.5G133000/Seita.5G259200/Seita.5G420200/Seita.6G192400/Seita.7G200700/Seita.9G243800/Seita.9G334700/Seita.9G406600/Seita.9G473000	20
pink	CC	GO:0044451	nucleoplasm part	32/370	363/9955	4.7663e-06	0.000116927	9.36686e-05	Seita.1G083500/Seita.1G269100/Seita.1G309700/Seita.2G002800/Seita.2G114800/Seita.2G162700/Seita.2G179200/Seita.2G201800/Seita.2G232700/Seita.2G416900/Seita.3G040000/Seita.3G121600/Seita.3G122500/Seita.3G193600/Seita.3G254700/Seita.3G345900/Seita.3G386500/Seita.4G027700/Seita.4G200100/Seita.5G071500/Seita.5G225200/Seita.5G259200/Seita.5G427500/Seita.6G039800/Seita.6G100400/Seita.6G113000/Seita.6G1…	32
pink	CC	GO:0080008	Cul4-RING E3 ubiquitin ligase complex	11/370	56/9955	5.32857e-06	0.000116927	9.36686e-05	Seita.1G351600/Seita.2G291200/Seita.3G040000/Seita.3G144100/Seita.3G174400/Seita.4G267000/Seita.5G003200/Seita.5G097300/Seita.5G155700/Seita.7G244600/Seita.9G338200	11
pink	CC	GO:0005635	nuclear envelope	16/370	116/9955	5.58844e-06	0.000116927	9.36686e-05	Seita.1G059400/Seita.1G351600/Seita.2G131600/Seita.2G387400/Seita.2G442800/Seita.3G144100/Seita.5G315300/Seita.6G099900/Seita.6G197400/Seita.7G212400/Seita.8G213100/Seita.9G404900/Seita.9G454600/Seita.9G484200/Seita.9G485300/Seita.9G537800	16
pink	CC	GO:0000228	nuclear chromosome	20/370	180/9955	1.13833e-05	0.000221161	0.000177168	Seita.1G278400/Seita.1G331900/Seita.2G232700/Seita.2G300700/Seita.3G043900/Seita.3G121600/Seita.3G122500/Seita.3G386500/Seita.4G112400/Seita.4G217000/Seita.5G028100/Seita.5G133000/Seita.5G228000/Seita.5G259200/Seita.5G414800/Seita.6G059100/Seita.6G192400/Seita.7G035100/Seita.7G200700/Seita.9G473000	20
pink	CC	GO:0071004	U2-type prespliceosome	5/370	10/9955	1.49125e-05	0.000270413	0.000216623	Seita.2G179200/Seita.5G243700/Seita.6G129000/Seita.9G495800/Seita.9G546800	5
pink	CC	GO:0005643	nuclear pore	9/370	44/9955	2.7452e-05	0.000466684	0.000373853	Seita.1G351600/Seita.2G387400/Seita.3G144100/Seita.5G315300/Seita.6G099900/Seita.8G213100/Seita.9G404900/Seita.9G484200/Seita.9G485300	9
pink	CC	GO:0030684	preribosome	10/370	55/9955	2.92128e-05	0.000467405	0.00037443	Seita.2G077000/Seita.3G132000/Seita.3G143200/Seita.4G267000/Seita.5G003200/Seita.7G187400/Seita.9G409300/Seita.9G414500/Seita.9G517100/Seita.9G537800	10
pink	CC	GO:0044454	nuclear chromosome part	18/370	169/9955	5.49935e-05	0.000831012	0.00066571	Seita.1G278400/Seita.2G232700/Seita.2G300700/Seita.3G043900/Seita.3G121600/Seita.3G122500/Seita.3G386500/Seita.4G112400/Seita.5G028100/Seita.5G133000/Seita.5G228000/Seita.5G259200/Seita.5G414800/Seita.6G059100/Seita.6G192400/Seita.7G035100/Seita.7G200700/Seita.9G473000	18
pink	CC	GO:0097525	spliceosomal snRNP complex	8/370	38/9955	6.20201e-05	0.000887867	0.000711256	Seita.1G005500/Seita.2G153600/Seita.2G179200/Seita.2G361400/Seita.5G243700/Seita.6G129000/Seita.9G121600/Seita.9G495800	8
pink	CC	GO:0097346	INO80-type complex	5/370	14/9955	0.000104707	0.00138953	0.00111313	Seita.2G232700/Seita.3G043900/Seita.3G121600/Seita.3G122500/Seita.5G259200	5
pink	CC	GO:0030532	small nuclear ribonucleoprotein complex	8/370	41/9955	0.000109917	0.00138953	0.00111313	Seita.1G005500/Seita.2G153600/Seita.2G179200/Seita.2G361400/Seita.5G243700/Seita.6G129000/Seita.9G121600/Seita.9G495800	8
pink	CC	GO:0070603	SWI/SNF superfamily-type complex	7/370	31/9955	0.000112388	0.00138953	0.00111313	Seita.1G278400/Seita.2G232700/Seita.3G043900/Seita.3G121600/Seita.3G122500/Seita.4G112400/Seita.5G259200	7
pink	CC	GO:0120114	Sm-like protein family complex	8/370	42/9955	0.000131441	0.00155444	0.00124523	Seita.1G005500/Seita.2G153600/Seita.2G179200/Seita.2G361400/Seita.5G243700/Seita.6G129000/Seita.9G121600/Seita.9G495800	8
pink	CC	GO:1904949	ATPase complex	7/370	35/9955	0.000252826	0.00286536	0.00229539	Seita.1G278400/Seita.2G232700/Seita.3G043900/Seita.3G121600/Seita.3G122500/Seita.4G112400/Seita.5G259200	7
pink	CC	GO:0030686	90S preribosome	6/370	26/9955	0.000309722	0.00324017	0.00259565	Seita.3G132000/Seita.4G267000/Seita.7G187400/Seita.9G414500/Seita.9G517100/Seita.9G537800	6
pink	CC	GO:0032040	small-subunit processome	6/370	26/9955	0.000309722	0.00324017	0.00259565	Seita.2G077000/Seita.4G267000/Seita.5G003200/Seita.7G187400/Seita.9G409300/Seita.9G537800	6
pink	CC	GO:0055029	nuclear DNA-directed RNA polymerase complex	13/370	119/9955	0.000461252	0.00464668	0.00372238	Seita.2G002800/Seita.2G114800/Seita.2G162700/Seita.2G201800/Seita.3G254700/Seita.3G345900/Seita.4G200100/Seita.4G217700/Seita.6G100400/Seita.6G114600/Seita.7G035100/Seita.7G148900/Seita.9G206500	13
pink	CC	GO:0071007	U2-type catalytic step 2 spliceosome	4/370	11/9955	0.000503372	0.0048899	0.00391722	Seita.2G411500/Seita.3G240400/Seita.4G058100/Seita.9G374100	4
pink	CC	GO:0000428	DNA-directed RNA polymerase complex	13/370	125/9955	0.000740084	0.00671009	0.00537534	Seita.2G002800/Seita.2G114800/Seita.2G162700/Seita.2G201800/Seita.3G254700/Seita.3G345900/Seita.4G200100/Seita.4G217700/Seita.6G100400/Seita.6G114600/Seita.7G035100/Seita.7G148900/Seita.9G206500	13
pink	CC	GO:0030880	RNA polymerase complex	13/370	125/9955	0.000740084	0.00671009	0.00537534	Seita.2G002800/Seita.2G114800/Seita.2G162700/Seita.2G201800/Seita.3G254700/Seita.3G345900/Seita.4G200100/Seita.4G217700/Seita.6G100400/Seita.6G114600/Seita.7G035100/Seita.7G148900/Seita.9G206500	13
pink	CC	GO:0035770	ribonucleoprotein granule	9/370	68/9955	0.000869648	0.00763046	0.00611263	Seita.1G031800/Seita.2G146700/Seita.2G234200/Seita.5G074800/Seita.5G331500/Seita.9G057500/Seita.9G152800/Seita.9G385400/Seita.9G521800	9
pink	CC	GO:0061695	transferase complex, transferring phosphorus-containing groups	15/370	161/9955	0.00095091	0.00808273	0.00647494	Seita.1G351600/Seita.2G002800/Seita.2G114800/Seita.2G162700/Seita.2G201800/Seita.3G254700/Seita.3G345900/Seita.4G200100/Seita.4G217700/Seita.6G091400/Seita.6G100400/Seita.6G114600/Seita.7G035100/Seita.7G148900/Seita.9G206500	15
pink	CC	GO:0031080	nuclear pore outer ring	4/370	13/9955	0.00102797	0.00847293	0.00678753	Seita.5G315300/Seita.6G099900/Seita.8G213100/Seita.9G484200	4
pink	CC	GO:0044452	nucleolar part	9/370	71/9955	0.00119187	0.00953494	0.00763828	Seita.2G114800/Seita.2G442800/Seita.3G184700/Seita.4G217700/Seita.4G267000/Seita.5G133000/Seita.7G187400/Seita.9G206500/Seita.9G537800	9
pink	CC	GO:0000790	nuclear chromatin	10/370	86/9955	0.00127268	0.00989053	0.00792314	Seita.1G278400/Seita.2G232700/Seita.3G043900/Seita.3G121600/Seita.3G122500/Seita.4G112400/Seita.5G133000/Seita.5G259200/Seita.6G192400/Seita.9G473000	10
pink	CC	GO:0016607	nuclear speck	10/370	90/9955	0.00180343	0.013242	0.010608	Seita.1G269100/Seita.2G179200/Seita.3G121600/Seita.3G386500/Seita.4G027700/Seita.5G259200/Seita.5G427500/Seita.6G113000/Seita.8G054400/Seita.9G546800	10
pink	CC	GO:0005849	mRNA cleavage factor complex	4/370	15/9955	0.00184999	0.013242	0.010608	Seita.1G083500/Seita.2G416900/Seita.5G225200/Seita.6G039800	4
pink	CC	GO:0035327	transcriptionally active chromatin	4/370	15/9955	0.00184999	0.013242	0.010608	Seita.3G193600/Seita.5G420200/Seita.9G243800/Seita.9G334700	4
pink	CC	GO:0036464	cytoplasmic ribonucleoprotein granule	8/370	67/9955	0.00324042	0.0225999	0.0181044	Seita.1G031800/Seita.2G146700/Seita.2G234200/Seita.5G074800/Seita.9G057500/Seita.9G152800/Seita.9G385400/Seita.9G521800	8
pink	CC	GO:0031461	cullin-RING ubiquitin ligase complex	11/370	120/9955	0.00498576	0.0339032	0.0271593	Seita.1G351600/Seita.2G291200/Seita.3G040000/Seita.3G144100/Seita.3G174400/Seita.4G267000/Seita.5G003200/Seita.5G097300/Seita.5G155700/Seita.7G244600/Seita.9G338200	11
pink	CC	GO:0030139	endocytic vesicle	4/370	20/9955	0.00566934	0.0376112	0.0301297	Seita.2G353000/Seita.4G108600/Seita.5G275000/Seita.9G468000	4
pink	CC	GO:0005852	eukaryotic translation initiation factor 3 complex	3/370	11/9955	0.006726	0.0435589	0.0348943	Seita.2G253000/Seita.5G082200/Seita.7G005400	3
pink	MF	GO:0140098	catalytic activity, acting on RNA	45/310	299/8539	1.37777e-16	5.49732e-14	4.84396e-14	Seita.1G005500/Seita.1G080100/Seita.1G136100/Seita.1G235700/Seita.1G269100/Seita.1G301700/Seita.1G322100/Seita.1G355500/Seita.1G374000/Seita.2G069700/Seita.2G146700/Seita.2G326100/Seita.2G403000/Seita.3G143200/Seita.3G295600/Seita.4G003400/Seita.4G027700/Seita.4G104300/Seita.4G167800/Seita.4G200700/Seita.5G014900/Seita.5G079500/Seita.5G114600/Seita.5G148400/Seita.5G197900/Seita.5G331500/Seita.6G1…	45
pink	MF	GO:0004004	ATP-dependent RNA helicase activity	22/310	80/8539	4.00766e-14	5.33019e-12	4.6967e-12	Seita.1G005500/Seita.1G080100/Seita.1G136100/Seita.1G374000/Seita.2G326100/Seita.2G403000/Seita.4G003400/Seita.4G167800/Seita.5G079500/Seita.5G114600/Seita.5G148400/Seita.5G197900/Seita.5G331500/Seita.6G145100/Seita.6G237900/Seita.7G100900/Seita.7G123800/Seita.8G030300/Seita.8G054400/Seita.8G239700/Seita.9G121600/Seita.9G428600	22
pink	MF	GO:0008186	RNA-dependent ATPase activity	22/310	80/8539	4.00766e-14	5.33019e-12	4.6967e-12	Seita.1G005500/Seita.1G080100/Seita.1G136100/Seita.1G374000/Seita.2G326100/Seita.2G403000/Seita.4G003400/Seita.4G167800/Seita.5G079500/Seita.5G114600/Seita.5G148400/Seita.5G197900/Seita.5G331500/Seita.6G145100/Seita.6G237900/Seita.7G100900/Seita.7G123800/Seita.8G030300/Seita.8G054400/Seita.8G239700/Seita.9G121600/Seita.9G428600	22
pink	MF	GO:0003724	RNA helicase activity	22/310	82/8539	7.03971e-14	7.02211e-12	6.18753e-12	Seita.1G005500/Seita.1G080100/Seita.1G136100/Seita.1G374000/Seita.2G326100/Seita.2G403000/Seita.4G003400/Seita.4G167800/Seita.5G079500/Seita.5G114600/Seita.5G148400/Seita.5G197900/Seita.5G331500/Seita.6G145100/Seita.6G237900/Seita.7G100900/Seita.7G123800/Seita.8G030300/Seita.8G054400/Seita.8G239700/Seita.9G121600/Seita.9G428600	22
pink	MF	GO:0008026	ATP-dependent helicase activity	23/310	105/8539	2.00171e-12	1.33114e-10	1.17293e-10	Seita.1G005500/Seita.1G080100/Seita.1G136100/Seita.1G374000/Seita.2G326100/Seita.2G403000/Seita.4G003400/Seita.4G112400/Seita.4G167800/Seita.5G079500/Seita.5G114600/Seita.5G148400/Seita.5G197900/Seita.5G331500/Seita.6G145100/Seita.6G237900/Seita.7G100900/Seita.7G123800/Seita.8G030300/Seita.8G054400/Seita.8G239700/Seita.9G121600/Seita.9G428600	23
pink	MF	GO:0070035	purine NTP-dependent helicase activity	23/310	105/8539	2.00171e-12	1.33114e-10	1.17293e-10	Seita.1G005500/Seita.1G080100/Seita.1G136100/Seita.1G374000/Seita.2G326100/Seita.2G403000/Seita.4G003400/Seita.4G112400/Seita.4G167800/Seita.5G079500/Seita.5G114600/Seita.5G148400/Seita.5G197900/Seita.5G331500/Seita.6G145100/Seita.6G237900/Seita.7G100900/Seita.7G123800/Seita.8G030300/Seita.8G054400/Seita.8G239700/Seita.9G121600/Seita.9G428600	23
pink	MF	GO:0004386	helicase activity	23/310	112/8539	8.35597e-12	4.7629e-10	4.19683e-10	Seita.1G005500/Seita.1G080100/Seita.1G136100/Seita.1G374000/Seita.2G326100/Seita.2G403000/Seita.4G003400/Seita.4G112400/Seita.4G167800/Seita.5G079500/Seita.5G114600/Seita.5G148400/Seita.5G197900/Seita.5G331500/Seita.6G145100/Seita.6G237900/Seita.7G100900/Seita.7G123800/Seita.8G030300/Seita.8G054400/Seita.8G239700/Seita.9G121600/Seita.9G428600	23
pink	MF	GO:0003729	mRNA binding	35/310	276/8539	6.66264e-11	3.32299e-09	2.92805e-09	Seita.1G031800/Seita.1G136100/Seita.1G331900/Seita.2G055300/Seita.2G069700/Seita.2G145500/Seita.2G234200/Seita.2G253000/Seita.2G382300/Seita.3G066900/Seita.3G276000/Seita.4G113800/Seita.5G054900/Seita.5G074800/Seita.5G082200/Seita.5G151700/Seita.5G225200/Seita.5G379000/Seita.5G427500/Seita.6G039800/Seita.6G096400/Seita.6G113000/Seita.6G192400/Seita.6G210700/Seita.7G028600/Seita.7G077600/Seita.7G1…	35
pink	MF	GO:0004519	endonuclease activity	39/310	444/8539	2.11943e-07	9.39614e-06	8.27941e-06	Seita.1G030400/Seita.1G046200/Seita.1G097300/Seita.1G221900/Seita.1G237400/Seita.1G327400/Seita.1G351200/Seita.2G096900/Seita.2G109100/Seita.2G203900/Seita.2G330900/Seita.2G382300/Seita.2G393500/Seita.3G051300/Seita.3G060100/Seita.3G246100/Seita.3G295600/Seita.3G392900/Seita.4G000500/Seita.4G248100/Seita.5G014600/Seita.5G055200/Seita.5G117900/Seita.5G198000/Seita.5G242100/Seita.5G425200/Seita.6G0…	39
pink	MF	GO:0017111	nucleoside-triphosphatase activity	38/310	451/8539	8.8021e-07	3.51204e-05	3.09463e-05	Seita.1G005500/Seita.1G080100/Seita.1G136100/Seita.1G374000/Seita.2G300700/Seita.2G326100/Seita.2G353000/Seita.2G372200/Seita.2G403000/Seita.3G122000/Seita.3G373200/Seita.4G003400/Seita.4G108600/Seita.4G112400/Seita.4G167800/Seita.5G079500/Seita.5G114600/Seita.5G148400/Seita.5G197900/Seita.5G198000/Seita.5G207400/Seita.5G263700/Seita.5G331500/Seita.5G395700/Seita.6G145100/Seita.6G237900/Seita.7G0…	38
pink	MF	GO:0016462	pyrophosphatase activity	39/310	481/8539	1.6396e-06	5.45166e-05	4.80373e-05	Seita.1G005500/Seita.1G080100/Seita.1G136100/Seita.1G374000/Seita.2G300700/Seita.2G326100/Seita.2G353000/Seita.2G372200/Seita.2G403000/Seita.3G122000/Seita.3G373200/Seita.4G003400/Seita.4G108600/Seita.4G112400/Seita.4G167800/Seita.5G079500/Seita.5G114600/Seita.5G148400/Seita.5G197900/Seita.5G198000/Seita.5G207400/Seita.5G263700/Seita.5G331500/Seita.5G395700/Seita.6G145100/Seita.6G237900/Seita.7G0…	39
pink	MF	GO:0016818	hydrolase activity, acting on acid anhydrides, in phosphorus-containing anhydrides	39/310	481/8539	1.6396e-06	5.45166e-05	4.80373e-05	Seita.1G005500/Seita.1G080100/Seita.1G136100/Seita.1G374000/Seita.2G300700/Seita.2G326100/Seita.2G353000/Seita.2G372200/Seita.2G403000/Seita.3G122000/Seita.3G373200/Seita.4G003400/Seita.4G108600/Seita.4G112400/Seita.4G167800/Seita.5G079500/Seita.5G114600/Seita.5G148400/Seita.5G197900/Seita.5G198000/Seita.5G207400/Seita.5G263700/Seita.5G331500/Seita.5G395700/Seita.6G145100/Seita.6G237900/Seita.7G0…	39
pink	MF	GO:0016817	hydrolase activity, acting on acid anhydrides	39/310	485/8539	2.01309e-06	6.17863e-05	5.4443e-05	Seita.1G005500/Seita.1G080100/Seita.1G136100/Seita.1G374000/Seita.2G300700/Seita.2G326100/Seita.2G353000/Seita.2G372200/Seita.2G403000/Seita.3G122000/Seita.3G373200/Seita.4G003400/Seita.4G108600/Seita.4G112400/Seita.4G167800/Seita.5G079500/Seita.5G114600/Seita.5G148400/Seita.5G197900/Seita.5G198000/Seita.5G207400/Seita.5G263700/Seita.5G331500/Seita.5G395700/Seita.6G145100/Seita.6G237900/Seita.7G0…	39
pink	MF	GO:0042623	ATPase activity, coupled	28/310	301/8539	4.12924e-06	0.000117683	0.000103697	Seita.1G005500/Seita.1G080100/Seita.1G136100/Seita.1G374000/Seita.2G326100/Seita.2G353000/Seita.2G372200/Seita.2G403000/Seita.4G003400/Seita.4G112400/Seita.4G167800/Seita.5G079500/Seita.5G114600/Seita.5G148400/Seita.5G197900/Seita.5G331500/Seita.5G395700/Seita.6G145100/Seita.6G237900/Seita.7G039700/Seita.7G100900/Seita.7G123800/Seita.8G030300/Seita.8G054400/Seita.8G239700/Seita.9G121600/Seita.9G4…	28
pink	MF	GO:0016887	ATPase activity	32/310	379/8539	6.58333e-06	0.000175117	0.000154304	Seita.1G005500/Seita.1G080100/Seita.1G136100/Seita.1G374000/Seita.2G300700/Seita.2G326100/Seita.2G353000/Seita.2G372200/Seita.2G403000/Seita.4G003400/Seita.4G112400/Seita.4G167800/Seita.5G079500/Seita.5G114600/Seita.5G148400/Seita.5G197900/Seita.5G198000/Seita.5G263700/Seita.5G331500/Seita.5G395700/Seita.6G145100/Seita.6G237900/Seita.7G039700/Seita.7G100900/Seita.7G123800/Seita.8G030300/Seita.8G0…	32
pink	MF	GO:0008173	RNA methyltransferase activity	8/310	34/8539	2.19272e-05	0.00054681	0.000481822	Seita.1G269100/Seita.1G301700/Seita.1G322100/Seita.3G143200/Seita.4G104300/Seita.6G125900/Seita.6G230400/Seita.9G374700	8
pink	MF	GO:0017056	structural constituent of nuclear pore	5/310	14/8539	9.32972e-05	0.00218974	0.00192949	Seita.5G315300/Seita.8G213100/Seita.9G404900/Seita.9G484200/Seita.9G485300	5
pink	MF	GO:0000049	tRNA binding	5/310	15/8539	0.000135808	0.00301041	0.00265262	Seita.1G322100/Seita.2G387400/Seita.3G132000/Seita.6G125900/Seita.9G283700	5
pink	MF	GO:0044877	protein-containing complex binding	17/310	194/8539	0.000671875	0.0141094	0.0124325	Seita.2G002800/Seita.2G043600/Seita.2G146700/Seita.2G353000/Seita.3G193600/Seita.3G345900/Seita.3G373200/Seita.3G386500/Seita.4G217000/Seita.5G133000/Seita.6G039800/Seita.7G100900/Seita.8G145600/Seita.9G108900/Seita.9G277900/Seita.9G505200/Seita.9G555800	17
pink	MF	GO:0032451	demethylase activity	5/310	22/8539	0.000965953	0.0183531	0.0161718	Seita.1G005800/Seita.3G024200/Seita.4G027700/Seita.9G406600/Seita.9G538300	5
pink	MF	GO:0070063	RNA polymerase binding	5/310	22/8539	0.000965953	0.0183531	0.0161718	Seita.2G002800/Seita.3G345900/Seita.5G331500/Seita.6G039800/Seita.9G505200	5
pink	MF	GO:0000993	RNA polymerase II complex binding	4/310	14/8539	0.00127762	0.022164	0.0195298	Seita.2G002800/Seita.3G345900/Seita.6G039800/Seita.9G505200	4
pink	MF	GO:0043175	RNA polymerase core enzyme binding	4/310	14/8539	0.00127762	0.022164	0.0195298	Seita.2G002800/Seita.3G345900/Seita.6G039800/Seita.9G505200	4
pink	MF	GO:0003682	chromatin binding	13/310	139/8539	0.00157824	0.0253645	0.0223499	Seita.1G005800/Seita.2G201800/Seita.2G227500/Seita.2G227600/Seita.3G193600/Seita.5G133000/Seita.5G263700/Seita.5G414800/Seita.6G192400/Seita.6G244400/Seita.7G231900/Seita.9G406600/Seita.9G473000	13
pink	MF	GO:0043021	ribonucleoprotein complex binding	7/310	48/8539	0.00158925	0.0253645	0.0223499	Seita.2G043600/Seita.2G146700/Seita.3G386500/Seita.7G100900/Seita.8G145600/Seita.9G108900/Seita.9G277900	7
pink	MF	GO:0003730	mRNA 3'-UTR binding	5/310	26/8539	0.00214204	0.032872	0.0289652	Seita.1G031800/Seita.3G066900/Seita.5G225200/Seita.5G379000/Seita.7G185700	5
pink	MF	GO:0051020	GTPase binding	10/310	95/8539	0.00225856	0.0333765	0.0294097	Seita.1G355500/Seita.2G387400/Seita.4G159900/Seita.4G200700/Seita.4G262600/Seita.5G275000/Seita.5G464200/Seita.7G212400/Seita.8G004100/Seita.9G088100	10
pink	MF	GO:0008168	methyltransferase activity	14/310	165/8539	0.00266102	0.0358706	0.0316074	Seita.1G092100/Seita.1G269100/Seita.1G301700/Seita.1G322100/Seita.3G143200/Seita.4G083900/Seita.4G104300/Seita.5G355100/Seita.5G464600/Seita.6G125900/Seita.6G230400/Seita.9G374700/Seita.9G503500/Seita.9G571500	14
pink	MF	GO:0001098	basal transcription machinery binding	4/310	17/8539	0.00278694	0.0358706	0.0316074	Seita.2G002800/Seita.3G345900/Seita.6G039800/Seita.9G505200	4
pink	MF	GO:0001099	basal RNA polymerase II transcription machinery binding	4/310	17/8539	0.00278694	0.0358706	0.0316074	Seita.2G002800/Seita.3G345900/Seita.6G039800/Seita.9G505200	4
pink	MF	GO:0032452	histone demethylase activity	4/310	17/8539	0.00278694	0.0358706	0.0316074	Seita.1G005800/Seita.3G024200/Seita.9G406600/Seita.9G538300	4
pink	MF	GO:0016741	transferase activity, transferring one-carbon groups	14/310	173/8539	0.00409277	0.0498323	0.0439097	Seita.1G092100/Seita.1G269100/Seita.1G301700/Seita.1G322100/Seita.3G143200/Seita.4G083900/Seita.4G104300/Seita.5G355100/Seita.5G464600/Seita.6G125900/Seita.6G230400/Seita.9G374700/Seita.9G503500/Seita.9G571500	14
pink	MF	GO:0005506	iron ion binding	5/310	30/8539	0.00412147	0.0498323	0.0439097	Seita.1G005800/Seita.1G322100/Seita.3G024200/Seita.5G276900/Seita.8G145600	5
purple	BP	GO:0019915	lipid storage	5/145	23/9983	1.64413e-05	0.00970894	0.00967977	Seita.2G156300/Seita.3G137900/Seita.5G355000/Seita.9G128500/Seita.9G579700	5
purple	BP	GO:0050826	response to freezing	5/145	24/9983	2.05263e-05	0.00970894	0.00967977	Seita.2G156300/Seita.3G162400/Seita.9G128500/Seita.9G420500/Seita.9G579700	5
purple	BP	GO:0009415	response to water	16/145	347/9983	4.20169e-05	0.0132493	0.0132095	Seita.1G173900/Seita.1G327600/Seita.2G406500/Seita.3G162400/Seita.4G082000/Seita.4G112000/Seita.5G166200/Seita.5G166300/Seita.6G114000/Seita.6G178100/Seita.6G180900/Seita.7G228200/Seita.7G283900/Seita.8G115200/Seita.9G198800/Seita.9G420500	16
purple	BP	GO:0009414	response to water deprivation	15/145	340/9983	0.000121222	0.028669	0.0285829	Seita.1G327600/Seita.2G406500/Seita.3G162400/Seita.4G082000/Seita.4G112000/Seita.5G166200/Seita.5G166300/Seita.6G114000/Seita.6G178100/Seita.6G180900/Seita.7G228200/Seita.7G283900/Seita.8G115200/Seita.9G198800/Seita.9G420500	15
red	BP	GO:0009617	response to bacterium	25/253	395/9983	2.24372e-05	0.0331622	0.0315538	Seita.2G057700/Seita.3G145000/Seita.3G195500/Seita.3G240900/Seita.3G282000/Seita.3G315000/Seita.3G355500/Seita.4G042100/Seita.5G017200/Seita.5G091900/Seita.5G240100/Seita.5G261700/Seita.5G331600/Seita.5G380300/Seita.5G382600/Seita.5G448000/Seita.6G000200/Seita.7G113700/Seita.7G181300/Seita.7G316000/Seita.8G152800/Seita.8G179000/Seita.9G226700/Seita.9G330700/Seita.9G484700	25
red	CC	GO:0005887	integral component of plasma membrane	16/257	211/9955	0.000111834	0.0127939	0.0122305	Seita.3G295900/Seita.3G333100/Seita.4G101500/Seita.5G403300/Seita.6G141000/Seita.7G102400/Seita.7G162400/Seita.7G316000/Seita.8G179000/Seita.8G222300/Seita.9G089200/Seita.9G238300/Seita.9G388900/Seita.9G389000/Seita.9G410000/Seita.J011800	16
red	CC	GO:0031226	intrinsic component of plasma membrane	21/257	331/9955	0.00013055	0.0127939	0.0122305	Seita.2G145300/Seita.2G199500/Seita.3G295900/Seita.3G315000/Seita.3G333100/Seita.4G101500/Seita.5G403300/Seita.5G448000/Seita.6G110400/Seita.6G141000/Seita.7G102400/Seita.7G162400/Seita.7G316000/Seita.8G179000/Seita.8G222300/Seita.9G089200/Seita.9G238300/Seita.9G388900/Seita.9G389000/Seita.9G410000/Seita.J011800	21
red	CC	GO:0044459	plasma membrane part	23/257	415/9955	0.000452867	0.0295873	0.0282844	Seita.2G145300/Seita.2G199500/Seita.2G294500/Seita.3G293600/Seita.3G295900/Seita.3G315000/Seita.3G333100/Seita.4G101500/Seita.5G403300/Seita.5G448000/Seita.6G110400/Seita.6G141000/Seita.7G102400/Seita.7G162400/Seita.7G316000/Seita.8G179000/Seita.8G222300/Seita.9G089200/Seita.9G238300/Seita.9G388900/Seita.9G389000/Seita.9G410000/Seita.J011800	23
red	MF	GO:0022804	active transmembrane transporter activity	18/227	253/8539	0.000132851	0.048225	0.0450296	Seita.1G039400/Seita.2G000400/Seita.2G368700/Seita.4G101500/Seita.5G017200/Seita.5G063700/Seita.5G221600/Seita.5G374300/Seita.7G035300/Seita.7G040200/Seita.7G102400/Seita.7G158700/Seita.7G216700/Seita.7G316000/Seita.8G222300/Seita.9G239300/Seita.9G388900/Seita.9G389000	18
royalblue	BP	GO:0009451	RNA modification	12/44	492/9983	8.93348e-07	0.00037878	0.00037878	Seita.1G110900/Seita.2G278000/Seita.3G006500/Seita.3G123600/Seita.4G027600/Seita.4G142900/Seita.4G260600/Seita.5G192500/Seita.5G471200/Seita.7G335800/Seita.9G265600/Seita.9G473200	12
royalblue	MF	GO:0004519	endonuclease activity	12/35	444/8539	9.41906e-08	8.66554e-06	8.66554e-06	Seita.1G110900/Seita.2G278000/Seita.3G006500/Seita.3G123600/Seita.4G027600/Seita.4G142900/Seita.4G260600/Seita.5G192500/Seita.5G471200/Seita.7G335800/Seita.9G265600/Seita.9G473200	12
saddlebrown	BP	GO:0090698	post-embryonic plant morphogenesis	6/30	199/9983	2.31773e-05	0.00739357	0.00617249	Seita.1G076300/Seita.3G168500/Seita.5G304800/Seita.7G166800/Seita.7G317200/Seita.9G532800	6
saddlebrown	BP	GO:0048646	anatomical structure formation involved in morphogenesis	6/30	270/9983	0.00012724	0.0127888	0.0106767	Seita.2G396100/Seita.3G168500/Seita.5G304800/Seita.6G158800/Seita.7G166800/Seita.7G317200	6
saddlebrown	BP	GO:0003002	regionalization	5/30	176/9983	0.000160362	0.0127888	0.0106767	Seita.3G168500/Seita.5G304800/Seita.7G166800/Seita.7G317200/Seita.9G532800	5
saddlebrown	BP	GO:0010016	shoot system morphogenesis	5/30	176/9983	0.000160362	0.0127888	0.0106767	Seita.2G396100/Seita.3G168500/Seita.5G304800/Seita.7G317200/Seita.9G532800	5
saddlebrown	BP	GO:0007389	pattern specification process	5/30	204/9983	0.000318866	0.0176378	0.0147249	Seita.3G168500/Seita.5G304800/Seita.7G166800/Seita.7G317200/Seita.9G532800	5
saddlebrown	BP	GO:0010199	organ boundary specification between lateral organs and the meristem	2/30	10/9983	0.000387037	0.0176378	0.0147249	Seita.6G158800/Seita.7G166800	2
saddlebrown	BP	GO:0010375	stomatal complex patterning	2/30	10/9983	0.000387037	0.0176378	0.0147249	Seita.3G168500/Seita.5G304800	2
saddlebrown	BP	GO:0009299	mRNA transcription	2/30	14/9983	0.000776846	0.0309767	0.0258608	Seita.1G076300/Seita.7G166800	2
saddlebrown	BP	GO:0048831	regulation of shoot system development	5/30	264/9983	0.00103192	0.036576	0.0305353	Seita.1G250900/Seita.2G396100/Seita.7G334500/Seita.8G001200/Seita.9G545700	5
salmon	MF	GO:0016722	oxidoreductase activity, oxidizing metal ions	5/86	36/8539	2.71767e-05	0.00483745	0.00477737	Seita.8G210700/Seita.8G211600/Seita.8G211700/Seita.8G212000/Seita.8G212100	5
steelblue	CC	GO:0044455	mitochondrial membrane part	8/40	108/9955	8.51604e-09	7.15347e-07	4.84069e-07	Seita.1G098000/Seita.1G292300/Seita.1G296800/Seita.4G278700/Seita.5G254700/Seita.5G365000/Seita.6G246100/Seita.9G305900	8
steelblue	CC	GO:0098800	inner mitochondrial membrane protein complex	7/40	84/9955	3.51772e-08	1.47744e-06	9.99774e-07	Seita.1G098000/Seita.1G292300/Seita.1G296800/Seita.4G278700/Seita.5G365000/Seita.6G246100/Seita.9G305900	7
steelblue	CC	GO:0098796	membrane protein complex	10/40	304/9955	2.28755e-07	5.59005e-06	3.78274e-06	Seita.1G098000/Seita.1G292300/Seita.1G296800/Seita.2G401900/Seita.4G008900/Seita.4G278700/Seita.5G365000/Seita.6G134100/Seita.6G246100/Seita.9G305900	10
steelblue	CC	GO:0044429	mitochondrial part	10/40	309/9955	2.66193e-07	5.59005e-06	3.78274e-06	Seita.1G098000/Seita.1G292300/Seita.1G296800/Seita.2G366700/Seita.4G278700/Seita.5G254700/Seita.5G365000/Seita.6G246100/Seita.9G305900/Seita.9G402500	10
steelblue	CC	GO:0098798	mitochondrial protein complex	7/40	119/9955	3.92817e-07	6.59932e-06	4.4657e-06	Seita.1G098000/Seita.1G292300/Seita.1G296800/Seita.4G278700/Seita.5G365000/Seita.6G246100/Seita.9G305900	7
steelblue	CC	GO:0031966	mitochondrial membrane	8/40	209/9955	1.42497e-06	1.54855e-05	1.04789e-05	Seita.1G098000/Seita.1G292300/Seita.1G296800/Seita.4G278700/Seita.5G254700/Seita.5G365000/Seita.6G246100/Seita.9G305900	8
steelblue	CC	GO:0005746	mitochondrial respiratory chain	5/40	50/9955	1.5009e-06	1.54855e-05	1.04789e-05	Seita.1G296800/Seita.4G278700/Seita.5G365000/Seita.6G246100/Seita.9G305900	5
steelblue	CC	GO:0070469	respiratory chain	5/40	51/9955	1.65916e-06	1.54855e-05	1.04789e-05	Seita.1G296800/Seita.4G278700/Seita.5G365000/Seita.6G246100/Seita.9G305900	5
steelblue	CC	GO:0098803	respiratory chain complex	5/40	51/9955	1.65916e-06	1.54855e-05	1.04789e-05	Seita.1G296800/Seita.4G278700/Seita.5G365000/Seita.6G246100/Seita.9G305900	5
steelblue	CC	GO:0005740	mitochondrial envelope	8/40	224/9955	2.39745e-06	2.01386e-05	1.36276e-05	Seita.1G098000/Seita.1G292300/Seita.1G296800/Seita.4G278700/Seita.5G254700/Seita.5G365000/Seita.6G246100/Seita.9G305900	8
steelblue	CC	GO:1990204	oxidoreductase complex	5/40	60/9955	3.75693e-06	2.86893e-05	1.94138e-05	Seita.1G296800/Seita.4G278700/Seita.5G365000/Seita.6G246100/Seita.9G305900	5
steelblue	CC	GO:0005743	mitochondrial inner membrane	7/40	172/9955	4.68968e-06	3.28278e-05	2.22143e-05	Seita.1G098000/Seita.1G292300/Seita.1G296800/Seita.4G278700/Seita.5G365000/Seita.6G246100/Seita.9G305900	7
steelblue	CC	GO:0005747	mitochondrial respiratory chain complex I	4/40	33/9955	8.40733e-06	5.0444e-05	3.4135e-05	Seita.1G296800/Seita.4G278700/Seita.6G246100/Seita.9G305900	4
steelblue	CC	GO:0045271	respiratory chain complex I	4/40	33/9955	8.40733e-06	5.0444e-05	3.4135e-05	Seita.1G296800/Seita.4G278700/Seita.6G246100/Seita.9G305900	4
steelblue	CC	GO:0030964	NADH dehydrogenase complex	4/40	36/9955	1.19978e-05	6.71879e-05	4.54655e-05	Seita.1G296800/Seita.4G278700/Seita.6G246100/Seita.9G305900	4
steelblue	CC	GO:0019866	organelle inner membrane	7/40	216/9955	2.0831e-05	0.000109363	7.40048e-05	Seita.1G098000/Seita.1G292300/Seita.1G296800/Seita.4G278700/Seita.5G365000/Seita.6G246100/Seita.9G305900	7
steelblue	CC	GO:0000502	proteasome complex	3/40	44/9955	0.000710106	0.00331383	0.00224244	Seita.1G060900/Seita.1G221200/Seita.2G272500	3
steelblue	CC	GO:1905369	endopeptidase complex	3/40	44/9955	0.000710106	0.00331383	0.00224244	Seita.1G060900/Seita.1G221200/Seita.2G272500	3
steelblue	CC	GO:0019774	proteasome core complex, beta-subunit complex	2/40	12/9955	0.00101292	0.00425425	0.00287882	Seita.1G060900/Seita.2G272500	2
steelblue	CC	GO:0045259	proton-transporting ATP synthase complex	2/40	12/9955	0.00101292	0.00425425	0.00287882	Seita.1G098000/Seita.1G292300	2
steelblue	CC	GO:1905368	peptidase complex	3/40	55/9955	0.00136431	0.00545724	0.00369287	Seita.1G060900/Seita.1G221200/Seita.2G272500	3
steelblue	CC	GO:0016469	proton-transporting two-sector ATPase complex	2/40	18/9955	0.0023126	0.00882993	0.00597514	Seita.1G098000/Seita.1G292300	2
steelblue	CC	GO:0005839	proteasome core complex	2/40	23/9955	0.0037759	0.0137902	0.00933174	Seita.1G060900/Seita.2G272500	2
steelblue	CC	GO:0005774	vacuolar membrane	6/40	466/9955	0.0100991	0.0353469	0.023919	Seita.1G060900/Seita.4G278700/Seita.5G254700/Seita.5G265600/Seita.5G374700/Seita.7G268600	6
steelblue	CC	GO:0044437	vacuolar part	6/40	473/9955	0.0108235	0.036367	0.0246093	Seita.1G060900/Seita.4G278700/Seita.5G254700/Seita.5G265600/Seita.5G374700/Seita.7G268600	6
steelblue	MF	GO:0050897	cobalt ion binding	4/28	26/8539	1.31594e-06	0.000139489	0.000130209	Seita.1G098000/Seita.1G292300/Seita.9G305900/Seita.9G402500	4
steelblue	MF	GO:0046914	transition metal ion binding	6/28	263/8539	0.000171596	0.0090946	0.0084895	Seita.1G098000/Seita.1G292300/Seita.2G366700/Seita.9G305900/Seita.9G402500/Seita.9G513600	6
tan	BP	GO:0006446	regulation of translational initiation	3/86	10/9983	7.09125e-05	0.0308136	0.0261115	Seita.1G113400/Seita.1G114300/Seita.1G114500	3
tan	BP	GO:0070601	centromeric sister chromatid cohesion	3/86	10/9983	7.09125e-05	0.0308136	0.0261115	Seita.3G133200/Seita.5G177500/Seita.6G110800	3
tan	BP	GO:0051177	meiotic sister chromatid cohesion	3/86	11/9983	9.6898e-05	0.0308136	0.0261115	Seita.3G133200/Seita.5G177500/Seita.6G110800	3
tan	BP	GO:0045144	meiotic sister chromatid segregation	3/86	13/9983	0.000165874	0.0395609	0.033524	Seita.3G133200/Seita.5G177500/Seita.6G110800	3
tan	BP	GO:0042866	pyruvate biosynthetic process	4/86	35/9983	0.00021926	0.0418347	0.0354508	Seita.2G056100/Seita.2G057100/Seita.7G193800/Seita.9G040100	4
tan	BP	GO:0031123	RNA 3'-end processing	5/86	69/9983	0.000307575	0.0489044	0.0414417	Seita.1G010500/Seita.1G011400/Seita.1G113400/Seita.1G114300/Seita.1G114500	5
tan	CC	GO:0005819	spindle	5/87	73/9955	0.000427567	0.0316979	0.0259515	Seita.1G006000/Seita.5G048800/Seita.5G177500/Seita.5G400400/Seita.9G040100	5
tan	CC	GO:0055029	nuclear DNA-directed RNA polymerase complex	6/87	119/9955	0.000590203	0.0316979	0.0259515	Seita.1G113400/Seita.1G114300/Seita.1G114500/Seita.3G362100/Seita.5G197300/Seita.7G078000	6
tan	CC	GO:0000428	DNA-directed RNA polymerase complex	6/87	125/9955	0.000765238	0.0316979	0.0259515	Seita.1G113400/Seita.1G114300/Seita.1G114500/Seita.3G362100/Seita.5G197300/Seita.7G078000	6
tan	CC	GO:0030880	RNA polymerase complex	6/87	125/9955	0.000765238	0.0316979	0.0259515	Seita.1G113400/Seita.1G114300/Seita.1G114500/Seita.3G362100/Seita.5G197300/Seita.7G078000	6
tan	CC	GO:0005665	RNA polymerase II, core complex	3/87	22/9955	0.000880497	0.0316979	0.0259515	Seita.1G113400/Seita.1G114300/Seita.1G114500	3
tan	MF	GO:0003899	DNA-directed 5'-3' RNA polymerase activity	5/70	30/8539	3.89331e-06	0.000447438	0.000388397	Seita.1G007500/Seita.1G113400/Seita.1G114300/Seita.1G114500/Seita.3G362100	5
tan	MF	GO:0034062	5'-3' RNA polymerase activity	5/70	33/8539	6.36168e-06	0.000447438	0.000388397	Seita.1G007500/Seita.1G113400/Seita.1G114300/Seita.1G114500/Seita.3G362100	5
tan	MF	GO:0097747	RNA polymerase activity	5/70	33/8539	6.36168e-06	0.000447438	0.000388397	Seita.1G007500/Seita.1G113400/Seita.1G114300/Seita.1G114500/Seita.3G362100	5
tan	MF	GO:0031369	translation initiation factor binding	3/70	11/8539	8.30577e-05	0.00438129	0.00380317	Seita.1G113400/Seita.1G114300/Seita.1G114500	3
tan	MF	GO:0140098	catalytic activity, acting on RNA	9/70	299/8539	0.000697457	0.0293104	0.0254428	Seita.1G007500/Seita.1G010500/Seita.1G011400/Seita.1G113400/Seita.1G114300/Seita.1G114500/Seita.3G362100/Seita.4G287300/Seita.9G049900	9
tan	MF	GO:0000287	magnesium ion binding	4/70	52/8539	0.000833472	0.0293104	0.0254428	Seita.2G056100/Seita.2G057100/Seita.3G357500/Seita.7G193800	4
tan	MF	GO:0016779	nucleotidyltransferase activity	5/70	94/8539	0.000999838	0.030138	0.0261612	Seita.1G007500/Seita.1G113400/Seita.1G114300/Seita.1G114500/Seita.3G362100	5
turquoise	BP	GO:0009657	plastid organization	131/2305	212/9983	3.9778e-34	9.99722e-31	9.76784e-31	Seita.1G003800/Seita.1G008600/Seita.1G012400/Seita.1G034200/Seita.1G049400/Seita.1G099500/Seita.1G109600/Seita.1G117200/Seita.1G159500/Seita.1G185600/Seita.1G192900/Seita.1G197200/Seita.1G207600/Seita.1G229100/Seita.1G257700/Seita.1G331400/Seita.1G349300/Seita.1G380300/Seita.2G193700/Seita.2G209700/Seita.2G288000/Seita.2G312000/Seita.2G317500/Seita.2G334500/Seita.2G344600/Seita.2G345300/Seita.2G3…	131
turquoise	BP	GO:0015979	photosynthesis	94/2305	128/9983	7.93116e-34	9.99722e-31	9.76784e-31	Seita.1G013300/Seita.1G118300/Seita.1G208500/Seita.1G211100/Seita.1G229100/Seita.1G287400/Seita.1G317800/Seita.1G321900/Seita.2G034400/Seita.2G043100/Seita.2G046600/Seita.2G051000/Seita.2G109800/Seita.2G166700/Seita.2G170300/Seita.2G202200/Seita.2G217800/Seita.2G248100/Seita.2G308700/Seita.2G318800/Seita.2G330500/Seita.2G335600/Seita.2G351600/Seita.2G352900/Seita.2G387600/Seita.2G389500/Seita.2G4…	94
turquoise	BP	GO:0019684	photosynthesis, light reaction	72/2305	91/9983	9.43172e-30	7.92579e-27	7.74394e-27	Seita.1G013300/Seita.1G118300/Seita.1G208500/Seita.1G211100/Seita.1G229100/Seita.1G287400/Seita.1G317800/Seita.1G321900/Seita.2G046600/Seita.2G109800/Seita.2G166700/Seita.2G170300/Seita.2G202200/Seita.2G217800/Seita.2G248100/Seita.2G308700/Seita.2G318800/Seita.2G330500/Seita.2G351600/Seita.2G352900/Seita.2G410100/Seita.3G039500/Seita.3G126900/Seita.3G141300/Seita.3G143800/Seita.3G158600/Seita.3G2…	72
turquoise	BP	GO:0009658	chloroplast organization	101/2305	158/9983	2.84406e-28	1.79247e-25	1.75134e-25	Seita.1G012400/Seita.1G034200/Seita.1G049400/Seita.1G099500/Seita.1G109600/Seita.1G117200/Seita.1G159500/Seita.1G185600/Seita.1G192900/Seita.1G197200/Seita.1G207600/Seita.1G229100/Seita.1G257700/Seita.1G331400/Seita.1G349300/Seita.1G380300/Seita.2G193700/Seita.2G288000/Seita.2G312000/Seita.2G317500/Seita.2G334500/Seita.2G345300/Seita.2G369200/Seita.2G392100/Seita.2G425900/Seita.2G427500/Seita.3G0…	101
turquoise	BP	GO:0006091	generation of precursor metabolites and energy	103/2305	227/9983	6.30324e-14	3.1781e-11	3.10518e-11	Seita.1G013300/Seita.1G118300/Seita.1G160800/Seita.1G208500/Seita.1G211100/Seita.1G229100/Seita.1G238300/Seita.1G287400/Seita.1G317800/Seita.1G321900/Seita.2G046600/Seita.2G109800/Seita.2G166700/Seita.2G170300/Seita.2G202200/Seita.2G217800/Seita.2G248100/Seita.2G288000/Seita.2G308700/Seita.2G318800/Seita.2G330500/Seita.2G351600/Seita.2G352900/Seita.2G410100/Seita.2G422000/Seita.2G445000/Seita.3G0…	103
turquoise	BP	GO:0009765	photosynthesis, light harvesting	19/2305	20/9983	1.18628e-11	4.98436e-09	4.87e-09	Seita.1G118300/Seita.2G046600/Seita.2G166700/Seita.2G217800/Seita.2G351600/Seita.2G352900/Seita.3G039500/Seita.3G141300/Seita.3G143800/Seita.3G249600/Seita.3G391500/Seita.4G139900/Seita.4G219400/Seita.4G267400/Seita.5G051800/Seita.7G123900/Seita.7G257400/Seita.8G080900/Seita.9G177100	19
turquoise	BP	GO:0009767	photosynthetic electron transport chain	30/2305	41/9983	1.39856e-11	5.0368e-09	4.92123e-09	Seita.1G013300/Seita.1G208500/Seita.1G317800/Seita.1G321900/Seita.2G109800/Seita.2G170300/Seita.2G202200/Seita.2G248100/Seita.2G330500/Seita.4G005600/Seita.4G267400/Seita.5G195800/Seita.6G005600/Seita.6G005700/Seita.6G082000/Seita.6G094800/Seita.6G103300/Seita.6G163000/Seita.6G190100/Seita.7G111300/Seita.7G171400/Seita.8G095300/Seita.8G095400/Seita.9G004200/Seita.9G092700/Seita.9G294600/Seita.9G3…	30
turquoise	BP	GO:0009668	plastid membrane organization	25/2305	38/9983	2.3696e-08	5.97377e-06	5.8367e-06	Seita.1G003800/Seita.1G008600/Seita.1G012400/Seita.2G209700/Seita.2G427500/Seita.3G001100/Seita.3G044300/Seita.3G251700/Seita.3G256000/Seita.3G330300/Seita.4G005600/Seita.4G267400/Seita.5G089600/Seita.5G114700/Seita.5G178900/Seita.5G288000/Seita.5G413000/Seita.6G176000/Seita.8G095300/Seita.8G095400/Seita.8G220100/Seita.9G060500/Seita.9G138000/Seita.9G414900/Seita.9G576300	25
turquoise	BP	GO:0010027	thylakoid membrane organization	25/2305	38/9983	2.3696e-08	5.97377e-06	5.8367e-06	Seita.1G003800/Seita.1G008600/Seita.1G012400/Seita.2G209700/Seita.2G427500/Seita.3G001100/Seita.3G044300/Seita.3G251700/Seita.3G256000/Seita.3G330300/Seita.4G005600/Seita.4G267400/Seita.5G089600/Seita.5G114700/Seita.5G178900/Seita.5G288000/Seita.5G413000/Seita.6G176000/Seita.8G095300/Seita.8G095400/Seita.8G220100/Seita.9G060500/Seita.9G138000/Seita.9G414900/Seita.9G576300	25
turquoise	BP	GO:0010109	regulation of photosynthesis	25/2305	38/9983	2.3696e-08	5.97377e-06	5.8367e-06	Seita.1G211100/Seita.2G034400/Seita.2G043100/Seita.2G248100/Seita.2G335600/Seita.2G389500/Seita.3G011200/Seita.3G113300/Seita.3G158600/Seita.3G203200/Seita.3G312300/Seita.3G390600/Seita.4G005600/Seita.4G267400/Seita.5G195800/Seita.5G336700/Seita.6G049900/Seita.6G082000/Seita.6G163000/Seita.7G094100/Seita.7G242800/Seita.8G040700/Seita.8G095300/Seita.8G095400/Seita.9G576300	25
turquoise	BP	GO:0042440	pigment metabolic process	71/2305	172/9983	6.64593e-08	1.52313e-05	1.48818e-05	Seita.1G034200/Seita.1G043800/Seita.1G073800/Seita.1G117200/Seita.1G134200/Seita.1G195800/Seita.1G204600/Seita.1G231800/Seita.1G255000/Seita.1G272600/Seita.1G334800/Seita.1G367300/Seita.2G044800/Seita.2G077800/Seita.2G202100/Seita.2G223900/Seita.2G417000/Seita.2G419800/Seita.3G031400/Seita.3G073200/Seita.3G155100/Seita.3G185800/Seita.3G245500/Seita.3G270200/Seita.3G370600/Seita.3G400600/Seita.4G0…	71
turquoise	BP	GO:0072598	protein localization to chloroplast	24/2305	38/9983	1.45133e-07	2.70344e-05	2.64141e-05	Seita.1G057500/Seita.1G062700/Seita.1G177800/Seita.1G348100/Seita.2G193700/Seita.2G241600/Seita.2G357700/Seita.2G413800/Seita.3G064700/Seita.3G086700/Seita.3G251700/Seita.4G205500/Seita.4G250300/Seita.5G379700/Seita.6G145400/Seita.6G191100/Seita.7G086500/Seita.7G106100/Seita.7G276500/Seita.9G008400/Seita.9G014200/Seita.9G162600/Seita.9G208600/Seita.9G461300	24
turquoise	BP	GO:0006778	porphyrin-containing compound metabolic process	43/2305	89/9983	1.50131e-07	2.70344e-05	2.64141e-05	Seita.1G034200/Seita.1G073800/Seita.1G123800/Seita.1G134200/Seita.1G195800/Seita.1G272600/Seita.2G044800/Seita.2G417000/Seita.2G419800/Seita.3G073200/Seita.3G245500/Seita.4G005600/Seita.4G022100/Seita.4G156200/Seita.4G234800/Seita.4G271200/Seita.5G003100/Seita.5G010700/Seita.5G033900/Seita.5G040100/Seita.5G184900/Seita.5G231400/Seita.5G365700/Seita.5G461800/Seita.6G094800/Seita.6G144300/Seita.6G1…	43
turquoise	BP	GO:0033013	tetrapyrrole metabolic process	43/2305	89/9983	1.50131e-07	2.70344e-05	2.64141e-05	Seita.1G034200/Seita.1G073800/Seita.1G123800/Seita.1G134200/Seita.1G195800/Seita.1G272600/Seita.2G044800/Seita.2G417000/Seita.2G419800/Seita.3G073200/Seita.3G245500/Seita.4G005600/Seita.4G022100/Seita.4G156200/Seita.4G234800/Seita.4G271200/Seita.5G003100/Seita.5G010700/Seita.5G033900/Seita.5G040100/Seita.5G184900/Seita.5G231400/Seita.5G365700/Seita.5G461800/Seita.6G094800/Seita.6G144300/Seita.6G1…	43
turquoise	BP	GO:0010114	response to red light	29/2305	52/9983	3.47174e-07	5.83484e-05	5.70097e-05	Seita.1G034200/Seita.1G043800/Seita.1G117200/Seita.1G204600/Seita.1G357200/Seita.2G170200/Seita.2G217800/Seita.2G351600/Seita.3G126900/Seita.3G134100/Seita.3G140100/Seita.3G286600/Seita.4G005600/Seita.4G060600/Seita.4G061500/Seita.4G139900/Seita.4G224000/Seita.4G234800/Seita.5G238500/Seita.5G332400/Seita.7G116400/Seita.7G119400/Seita.8G080900/Seita.8G095300/Seita.8G095400/Seita.8G112700/Seita.9G1…	29
turquoise	BP	GO:0006779	porphyrin-containing compound biosynthetic process	33/2305	63/9983	3.94862e-07	6.22155e-05	6.0788e-05	Seita.1G034200/Seita.1G073800/Seita.1G134200/Seita.1G195800/Seita.1G272600/Seita.2G044800/Seita.2G417000/Seita.2G419800/Seita.3G073200/Seita.3G245500/Seita.4G005600/Seita.4G022100/Seita.4G156200/Seita.4G234800/Seita.4G271200/Seita.5G003100/Seita.5G033900/Seita.5G040100/Seita.5G184900/Seita.5G231400/Seita.5G365700/Seita.5G461800/Seita.6G094800/Seita.6G161200/Seita.7G152800/Seita.7G290300/Seita.8G0…	33
turquoise	BP	GO:0009773	photosynthetic electron transport in photosystem I	11/2305	12/9983	9.24381e-07	0.00013708	0.000133935	Seita.1G317800/Seita.1G321900/Seita.2G109800/Seita.2G170300/Seita.2G202200/Seita.2G248100/Seita.6G103300/Seita.9G004200/Seita.9G092700/Seita.9G342500/Seita.9G534200	11
turquoise	BP	GO:0033014	tetrapyrrole biosynthetic process	33/2305	65/9983	1.0071e-06	0.000138692	0.000135509	Seita.1G034200/Seita.1G073800/Seita.1G134200/Seita.1G195800/Seita.1G272600/Seita.2G044800/Seita.2G417000/Seita.2G419800/Seita.3G073200/Seita.3G245500/Seita.4G005600/Seita.4G022100/Seita.4G156200/Seita.4G234800/Seita.4G271200/Seita.5G003100/Seita.5G033900/Seita.5G040100/Seita.5G184900/Seita.5G231400/Seita.5G365700/Seita.5G461800/Seita.6G094800/Seita.6G161200/Seita.7G152800/Seita.7G290300/Seita.8G0…	33
turquoise	BP	GO:0045036	protein targeting to chloroplast	22/2305	36/9983	1.10029e-06	0.000138692	0.000135509	Seita.1G057500/Seita.1G062700/Seita.1G177800/Seita.1G348100/Seita.2G193700/Seita.2G241600/Seita.2G357700/Seita.2G413800/Seita.3G064700/Seita.3G086700/Seita.4G205500/Seita.4G250300/Seita.5G379700/Seita.6G145400/Seita.6G191100/Seita.7G086500/Seita.7G106100/Seita.7G276500/Seita.9G008400/Seita.9G162600/Seita.9G208600/Seita.9G461300	22
turquoise	BP	GO:0072596	establishment of protein localization to chloroplast	22/2305	36/9983	1.10029e-06	0.000138692	0.000135509	Seita.1G057500/Seita.1G062700/Seita.1G177800/Seita.1G348100/Seita.2G193700/Seita.2G241600/Seita.2G357700/Seita.2G413800/Seita.3G064700/Seita.3G086700/Seita.4G205500/Seita.4G250300/Seita.5G379700/Seita.6G145400/Seita.6G191100/Seita.7G086500/Seita.7G106100/Seita.7G276500/Seita.9G008400/Seita.9G162600/Seita.9G208600/Seita.9G461300	22
turquoise	BP	GO:0009639	response to red or far red light	66/2305	167/9983	1.25243e-06	0.000150351	0.000146901	Seita.1G034200/Seita.1G043800/Seita.1G117200/Seita.1G204600/Seita.1G225000/Seita.1G229100/Seita.1G250600/Seita.1G288100/Seita.1G305900/Seita.1G308800/Seita.1G317400/Seita.1G334800/Seita.1G357200/Seita.2G083700/Seita.2G166700/Seita.2G170200/Seita.2G178900/Seita.2G193700/Seita.2G217800/Seita.2G241600/Seita.2G351600/Seita.3G073200/Seita.3G126900/Seita.3G134100/Seita.3G140100/Seita.3G286600/Seita.3G3…	66
turquoise	BP	GO:0046148	pigment biosynthetic process	52/2305	126/9983	3.74838e-06	0.00042953	0.000419675	Seita.1G034200/Seita.1G073800/Seita.1G134200/Seita.1G195800/Seita.1G231800/Seita.1G255000/Seita.1G272600/Seita.1G367300/Seita.2G044800/Seita.2G077800/Seita.2G202100/Seita.2G223900/Seita.2G417000/Seita.2G419800/Seita.3G031400/Seita.3G073200/Seita.3G155100/Seita.3G245500/Seita.3G370600/Seita.3G400600/Seita.4G005600/Seita.4G022100/Seita.4G156200/Seita.4G234800/Seita.4G271200/Seita.4G288600/Seita.5G0…	52
turquoise	BP	GO:0051186	cofactor metabolic process	125/2305	379/9983	4.77625e-06	0.00050276	0.000491224	Seita.1G023500/Seita.1G034200/Seita.1G073800/Seita.1G117500/Seita.1G123800/Seita.1G127500/Seita.1G134200/Seita.1G159500/Seita.1G160800/Seita.1G180800/Seita.1G184000/Seita.1G192100/Seita.1G195800/Seita.1G204600/Seita.1G211100/Seita.1G238300/Seita.1G272600/Seita.1G290400/Seita.1G363400/Seita.2G044800/Seita.2G178900/Seita.2G223900/Seita.2G248100/Seita.2G288000/Seita.2G306800/Seita.2G382200/Seita.2G3…	125
turquoise	BP	GO:0016108	tetraterpenoid metabolic process	23/2305	41/9983	4.98572e-06	0.00050276	0.000491224	Seita.1G123800/Seita.1G255000/Seita.1G272600/Seita.1G367300/Seita.2G044800/Seita.2G077800/Seita.2G136100/Seita.3G031400/Seita.4G005600/Seita.4G288600/Seita.5G197100/Seita.5G258300/Seita.5G285200/Seita.5G315800/Seita.6G161200/Seita.7G067200/Seita.7G116400/Seita.8G095300/Seita.8G095400/Seita.8G101900/Seita.9G204500/Seita.9G336100/Seita.9G515900	23
turquoise	BP	GO:0016116	carotenoid metabolic process	23/2305	41/9983	4.98572e-06	0.00050276	0.000491224	Seita.1G123800/Seita.1G255000/Seita.1G272600/Seita.1G367300/Seita.2G044800/Seita.2G077800/Seita.2G136100/Seita.3G031400/Seita.4G005600/Seita.4G288600/Seita.5G197100/Seita.5G258300/Seita.5G285200/Seita.5G315800/Seita.6G161200/Seita.7G067200/Seita.7G116400/Seita.8G095300/Seita.8G095400/Seita.8G101900/Seita.9G204500/Seita.9G336100/Seita.9G515900	23
turquoise	BP	GO:0045454	cell redox homeostasis	20/2305	34/9983	7.80643e-06	0.000756924	0.000739557	Seita.1G203000/Seita.1G249300/Seita.1G336800/Seita.2G145400/Seita.2G312300/Seita.2G417000/Seita.3G016700/Seita.3G089400/Seita.3G099600/Seita.5G359600/Seita.5G463500/Seita.6G082000/Seita.6G129100/Seita.7G279700/Seita.9G051500/Seita.9G077800/Seita.9G100800/Seita.9G237000/Seita.9G262500/Seita.9G530800	20
turquoise	BP	GO:0031425	chloroplast RNA processing	13/2305	18/9983	1.33673e-05	0.0012277	0.00119953	Seita.1G322000/Seita.2G036900/Seita.2G044800/Seita.2G068700/Seita.2G082900/Seita.2G345300/Seita.3G253600/Seita.4G168200/Seita.5G369700/Seita.5G381200/Seita.6G112900/Seita.9G057100/Seita.9G489900	13
turquoise	BP	GO:0051188	cofactor biosynthetic process	79/2305	222/9983	1.39278e-05	0.0012277	0.00119953	Seita.1G034200/Seita.1G073800/Seita.1G127500/Seita.1G134200/Seita.1G160800/Seita.1G195800/Seita.1G211100/Seita.1G272600/Seita.1G363400/Seita.2G044800/Seita.2G223900/Seita.2G288000/Seita.2G382200/Seita.2G389500/Seita.2G417000/Seita.2G419800/Seita.3G050000/Seita.3G073200/Seita.3G183400/Seita.3G245500/Seita.3G298800/Seita.3G348900/Seita.3G392700/Seita.4G005600/Seita.4G022100/Seita.4G156200/Seita.4G2…	79
turquoise	BP	GO:0010206	photosystem II repair	9/2305	10/9983	1.46096e-05	0.0012277	0.00119953	Seita.1G118300/Seita.2G046600/Seita.3G039500/Seita.3G141300/Seita.3G249600/Seita.3G391500/Seita.4G267400/Seita.5G051800/Seita.7G123900	9
turquoise	BP	GO:0010207	photosystem II assembly	9/2305	10/9983	1.46096e-05	0.0012277	0.00119953	Seita.2G046600/Seita.2G318800/Seita.3G126900/Seita.5G017500/Seita.5G164200/Seita.8G080900/Seita.9G060500/Seita.9G093400/Seita.9G552200	9
turquoise	BP	GO:0000373	Group II intron splicing	12/2305	16/9983	1.57756e-05	0.00128291	0.00125348	Seita.1G287400/Seita.1G314400/Seita.1G322000/Seita.3G139500/Seita.3G156100/Seita.5G154500/Seita.5G354500/Seita.6G124900/Seita.7G127900/Seita.8G170300/Seita.9G027200/Seita.9G384400	12
turquoise	BP	GO:0015994	chlorophyll metabolic process	33/2305	73/9983	2.41796e-05	0.0019049	0.00186119	Seita.1G034200/Seita.1G073800/Seita.1G123800/Seita.1G272600/Seita.2G044800/Seita.2G417000/Seita.2G419800/Seita.3G073200/Seita.3G245500/Seita.4G005600/Seita.4G022100/Seita.4G156200/Seita.4G234800/Seita.5G003100/Seita.5G010700/Seita.5G040100/Seita.5G365700/Seita.5G461800/Seita.6G144300/Seita.6G161200/Seita.7G067200/Seita.7G261400/Seita.7G290300/Seita.8G095300/Seita.8G095400/Seita.8G104100/Seita.9G1…	33
turquoise	BP	GO:0045037	protein import into chloroplast stroma	14/2305	21/9983	2.56472e-05	0.00195929	0.00191434	Seita.1G057500/Seita.1G062700/Seita.2G193700/Seita.2G241600/Seita.2G357700/Seita.2G413800/Seita.3G064700/Seita.4G205500/Seita.4G250300/Seita.6G145400/Seita.6G191100/Seita.7G106100/Seita.9G208600/Seita.9G461300	14
turquoise	BP	GO:0034599	cellular response to oxidative stress	46/2305	114/9983	2.66668e-05	0.00197727	0.0019319	Seita.1G192100/Seita.1G203000/Seita.1G204600/Seita.1G206500/Seita.1G249300/Seita.1G336800/Seita.2G217300/Seita.2G225400/Seita.2G312300/Seita.3G016700/Seita.3G089400/Seita.3G099600/Seita.3G192500/Seita.3G248500/Seita.4G031200/Seita.4G040000/Seita.4G056500/Seita.4G234000/Seita.5G072400/Seita.5G151600/Seita.5G151900/Seita.5G232400/Seita.5G258500/Seita.5G306200/Seita.5G306400/Seita.5G414600/Seita.5G4…	46
turquoise	BP	GO:0022900	electron transport chain	36/2305	83/9983	3.19222e-05	0.00224854	0.00219695	Seita.1G013300/Seita.1G208500/Seita.1G317800/Seita.1G321900/Seita.2G109800/Seita.2G170300/Seita.2G202200/Seita.2G248100/Seita.2G330500/Seita.4G005600/Seita.4G087300/Seita.4G217200/Seita.4G267400/Seita.5G195800/Seita.5G444300/Seita.6G005600/Seita.6G005700/Seita.6G082000/Seita.6G094800/Seita.6G103300/Seita.6G163000/Seita.6G190100/Seita.7G111300/Seita.7G171400/Seita.8G095300/Seita.8G095400/Seita.9G0…	36
turquoise	BP	GO:0009110	vitamin biosynthetic process	27/2305	56/9983	3.21092e-05	0.00224854	0.00219695	Seita.1G123800/Seita.1G127500/Seita.1G211100/Seita.1G287200/Seita.3G033200/Seita.3G216400/Seita.3G343200/Seita.3G392700/Seita.4G190800/Seita.4G199600/Seita.5G014400/Seita.5G253900/Seita.6G093600/Seita.6G123300/Seita.7G160700/Seita.7G277300/Seita.7G280800/Seita.8G214400/Seita.9G008300/Seita.9G140100/Seita.9G186600/Seita.9G191500/Seita.9G248700/Seita.9G460100/Seita.9G510600/Seita.9G566600/Seita.9G5…	27
turquoise	BP	GO:0032544	plastid translation	10/2305	13/9983	6.00992e-05	0.00409486	0.00400091	Seita.3G002400/Seita.4G218100/Seita.4G255700/Seita.5G004900/Seita.5G115600/Seita.6G013200/Seita.7G125300/Seita.8G220100/Seita.9G187900/Seita.9G536900	10
turquoise	BP	GO:0005982	starch metabolic process	28/2305	61/9983	7.03726e-05	0.00466866	0.00456155	Seita.1G094500/Seita.1G107700/Seita.1G201800/Seita.1G318200/Seita.2G057600/Seita.2G417000/Seita.2G422000/Seita.3G133300/Seita.3G167300/Seita.3G253500/Seita.4G065500/Seita.4G151100/Seita.4G286200/Seita.5G004000/Seita.5G295100/Seita.5G393200/Seita.6G120500/Seita.6G128700/Seita.6G211200/Seita.7G022300/Seita.7G088700/Seita.8G014700/Seita.9G118400/Seita.9G136200/Seita.9G247300/Seita.9G317500/Seita.9G5…	28
turquoise	BP	GO:0006979	response to oxidative stress	119/2305	380/9983	0.000107821	0.00696968	0.00680977	Seita.1G003800/Seita.1G117500/Seita.1G123800/Seita.1G134200/Seita.1G192100/Seita.1G198600/Seita.1G203000/Seita.1G204600/Seita.1G206500/Seita.1G209000/Seita.1G240200/Seita.1G249300/Seita.1G287700/Seita.1G336800/Seita.1G364500/Seita.2G013400/Seita.2G066900/Seita.2G178900/Seita.2G188200/Seita.2G217300/Seita.2G225400/Seita.2G250600/Seita.2G252400/Seita.2G312300/Seita.2G320700/Seita.2G425700/Seita.3G0…	119
[truncated: 216 more rows]
