# Supplementary material for: Response of Multiple Tissues to Drought Revealed by a Weighted Gene Co-Expression Network Analysis in Foxtail Millet [Setaria italica (L.) P. Beauv.]
Source: Front Plant Sci. 2022 Jan 12;12:746166. doi: 10.3389/fpls.2021.746166 (PMC8790073; doi:10.3389/fpls.2021.746166)
Supplement: Supplementary Table S13 — A list of KEGG categories of each module. [file Table_13.XLSX]

## Sheet: Supplementary Table S13
Supplementary Table S13: List of KEGG categories of each module
Cluster	ID	Description	GeneRatio	BgRatio	pvalue	p.adjust	qvalue	geneID	Count
black	sita03010	Ribosome	190/347	334/5494	1.45956e-159	9.19522e-158	8.75735e-158	Seita.1G002100/Seita.1G003100/Seita.1G023800/Seita.1G028300/Seita.1G046600/Seita.1G073500/Seita.1G078300/Seita.1G117100/Seita.1G119400/Seita.1G160500/Seita.1G166300/Seita.1G181800/Seita.1G205300/Seita.1G214900/Seita.1G230300/Seita.1G231100/Seita.1G238800/Seita.1G284700/Seita.1G297300/Seita.1G314000/Seita.1G344200/Seita.1G363100/Seita.1G363500/Seita.2G046800/Seita.2G048400/Seita.2G059900/Seita.2G0…	190
black	sita03008	Ribosome biogenesis in eukaryotes	17/347	99/5494	0.000127438	0.00401431	0.00382315	Seita.1G305100/Seita.1G370900/Seita.2G404800/Seita.3G137600/Seita.4G066800/Seita.4G106800/Seita.4G122000/Seita.5G057000/Seita.6G007400/Seita.6G058500/Seita.7G279600/Seita.8G161700/Seita.9G233700/Seita.9G403000/Seita.9G404600/Seita.9G404700/Seita.9G473700	17
black	sita03040	Spliceosome	24/347	199/5494	0.0015107	0.0317247	0.030214	Seita.1G002300/Seita.1G230600/Seita.2G044300/Seita.2G381300/Seita.2G385800/Seita.3G027600/Seita.3G065200/Seita.3G119600/Seita.3G205100/Seita.3G257000/Seita.3G270900/Seita.4G193100/Seita.5G465700/Seita.6G062900/Seita.6G112200/Seita.6G193500/Seita.7G075200/Seita.7G132400/Seita.7G169200/Seita.7G254500/Seita.9G215000/Seita.9G473700/Seita.9G473900/Seita.9G572100	24
blue	sita00940	Phenylpropanoid biosynthesis	105/1028	282/5494	4.42e-14	5.083e-12	4.65263e-12	Seita.1G022300/Seita.1G022400/Seita.1G062400/Seita.1G098200/Seita.1G098400/Seita.1G157600/Seita.1G170300/Seita.1G240400/Seita.1G240500/Seita.1G281400/Seita.1G360800/Seita.2G004800/Seita.2G010900/Seita.2G147600/Seita.2G254000/Seita.2G270500/Seita.2G320200/Seita.2G406600/Seita.2G406700/Seita.2G407100/Seita.2G407300/Seita.2G407400/Seita.2G407500/Seita.2G407600/Seita.2G408500/Seita.2G408600/Seita.2G4…	105
blue	sita04626	Plant-pathogen interaction	77/1028	243/5494	4.72252e-07	2.71545e-05	2.48554e-05	Seita.1G042400/Seita.1G102100/Seita.1G336400/Seita.1G345400/Seita.1G379000/Seita.2G024800/Seita.2G024900/Seita.2G062100/Seita.2G103900/Seita.2G111700/Seita.2G246400/Seita.2G357800/Seita.2G433900/Seita.3G093600/Seita.3G103400/Seita.3G128600/Seita.3G135500/Seita.3G137500/Seita.3G206900/Seita.3G261400/Seita.3G290500/Seita.3G350300/Seita.3G380800/Seita.4G044900/Seita.4G163600/Seita.4G206600/Seita.4G2…	77
blue	sita00480	Glutathione metabolism	50/1028	141/5494	1.43791e-06	5.51198e-05	5.04529e-05	Seita.1G166500/Seita.1G221400/Seita.1G263500/Seita.1G361800/Seita.2G033200/Seita.2G033500/Seita.2G293400/Seita.2G293500/Seita.2G444000/Seita.3G038500/Seita.3G038700/Seita.3G268800/Seita.4G038800/Seita.4G114600/Seita.4G168600/Seita.4G241000/Seita.5G168800/Seita.5G169900/Seita.5G171200/Seita.5G279800/Seita.5G328300/Seita.5G444700/Seita.5G453000/Seita.5G453100/Seita.5G453300/Seita.5G453400/Seita.7G0…	50
blue	sita00592	alpha-Linolenic acid metabolism	22/1028	58/5494	0.000448141	0.0128841	0.0117932	Seita.1G033100/Seita.1G033200/Seita.1G196700/Seita.3G070700/Seita.4G002200/Seita.4G077800/Seita.4G077900/Seita.4G078000/Seita.4G078100/Seita.4G078200/Seita.4G078300/Seita.4G144800/Seita.5G161800/Seita.5G169400/Seita.5G169500/Seita.7G061200/Seita.7G109800/Seita.7G110100/Seita.7G267400/Seita.8G180100/Seita.9G041700/Seita.9G552000	22
blue	sita00910	Nitrogen metabolism	16/1028	38/5494	0.000705896	0.0162356	0.014861	Seita.1G114900/Seita.1G115400/Seita.1G115700/Seita.1G115800/Seita.1G116000/Seita.1G116100/Seita.1G181000/Seita.1G212900/Seita.2G235500/Seita.5G286900/Seita.6G179900/Seita.6G180000/Seita.6G189000/Seita.6G189200/Seita.8G034800/Seita.9G057700	16
blue	sita04016	MAPK signaling pathway - plant	48/1028	167/5494	0.000900022	0.0172504	0.0157899	Seita.1G089400/Seita.1G185200/Seita.1G205600/Seita.1G345400/Seita.2G024800/Seita.2G024900/Seita.2G039200/Seita.2G103900/Seita.2G138400/Seita.2G253900/Seita.2G341400/Seita.3G007100/Seita.3G160800/Seita.3G206900/Seita.3G250400/Seita.3G369900/Seita.4G163600/Seita.4G223000/Seita.4G239500/Seita.4G251700/Seita.4G286000/Seita.5G175100/Seita.5G231200/Seita.5G233100/Seita.5G284300/Seita.5G284400/Seita.5G2…	48
blue	sita00010	Glycolysis / Gluconeogenesis	47/1028	165/5494	0.00125122	0.0205558	0.0188154	Seita.1G004200/Seita.1G364000/Seita.2G167900/Seita.2G205000/Seita.2G394300/Seita.2G394400/Seita.3G109600/Seita.3G111200/Seita.3G219400/Seita.3G219600/Seita.3G391300/Seita.4G072300/Seita.4G093100/Seita.5G135500/Seita.5G377200/Seita.5G377300/Seita.5G380500/Seita.5G380600/Seita.6G090600/Seita.6G156600/Seita.6G183400/Seita.7G122500/Seita.7G123000/Seita.7G123100/Seita.7G132000/Seita.7G226400/Seita.7G2…	47
brown	sita04144	Endocytosis	44/639	169/5494	1.16138e-07	1.27752e-05	1.1736e-05	Seita.1G023900/Seita.1G081800/Seita.1G220000/Seita.1G300700/Seita.1G314200/Seita.1G358700/Seita.1G365900/Seita.2G084100/Seita.2G091300/Seita.2G212100/Seita.2G269500/Seita.2G282900/Seita.2G283200/Seita.2G313000/Seita.2G400000/Seita.2G403500/Seita.3G070500/Seita.3G098000/Seita.3G178100/Seita.3G178300/Seita.3G215900/Seita.3G292700/Seita.3G312900/Seita.3G358300/Seita.4G100400/Seita.4G238300/Seita.5G0…	44
brown	sita00520	Amino sugar and nucleotide sugar metabolism	37/639	161/5494	2.7372e-05	0.00150546	0.00138301	Seita.1G165500/Seita.2G094900/Seita.2G176100/Seita.2G235900/Seita.2G253300/Seita.2G282600/Seita.2G429400/Seita.2G435100/Seita.2G439200/Seita.3G025300/Seita.3G061000/Seita.3G119400/Seita.3G173900/Seita.3G240700/Seita.3G337900/Seita.4G098200/Seita.4G286800/Seita.5G029100/Seita.5G237300/Seita.5G373800/Seita.5G447800/Seita.6G060000/Seita.7G150300/Seita.7G150600/Seita.7G230800/Seita.7G235100/Seita.7G3…	37
brown	sita04145	Phagosome	20/639	77/5494	0.000361517	0.0132556	0.0121774	Seita.1G109800/Seita.1G140000/Seita.1G380100/Seita.2G079300/Seita.2G138800/Seita.2G364600/Seita.3G178300/Seita.3G242000/Seita.4G115600/Seita.4G162500/Seita.5G037100/Seita.5G353000/Seita.5G371100/Seita.5G412500/Seita.5G462100/Seita.7G083500/Seita.9G068600/Seita.9G073000/Seita.9G110400/Seita.9G576600	20
brown	sita03410	Base excision repair	13/639	42/5494	0.000648191	0.0178252	0.0163753	Seita.2G112900/Seita.2G133600/Seita.2G207200/Seita.3G134400/Seita.3G143000/Seita.3G261000/Seita.4G104600/Seita.4G105300/Seita.4G196500/Seita.5G348800/Seita.6G191700/Seita.7G003400/Seita.7G156300	13
cyan	sita00563	Glycosylphosphatidylinositol (GPI)-anchor biosynthesis	5/78	26/5494	2.64038e-05	0.00116177	0.00102836	Seita.1G119800/Seita.1G277700/Seita.2G130200/Seita.3G375000/Seita.5G464400	5
cyan	sita04141	Protein processing in endoplasmic reticulum	11/78	217/5494	0.000213677	0.0047009	0.00416108	Seita.2G310300/Seita.2G416500/Seita.3G302100/Seita.5G167800/Seita.5G367900/Seita.7G016400/Seita.8G114200/Seita.8G120000/Seita.9G097400/Seita.9G185900/Seita.9G360200	11
cyan	sita03013	RNA transport	10/78	193/5494	0.000355807	0.0052185	0.00461924	Seita.1G219000/Seita.2G322200/Seita.2G349300/Seita.5G065600/Seita.5G261100/Seita.7G105700/Seita.7G154900/Seita.7G158600/Seita.7G335200/Seita.9G523200	10
cyan	sita04144	Endocytosis	8/78	169/5494	0.00254475	0.0279923	0.0247779	Seita.4G287700/Seita.5G247900/Seita.5G381400/Seita.7G333500/Seita.8G020100/Seita.9G051300/Seita.9G326800/Seita.9G470100	8
darkgrey	sita03050	Proteasome	11/42	63/5494	5.88739e-13	1.47185e-11	1.36339e-11	Seita.1G245700/Seita.1G354000/Seita.3G119900/Seita.3G240100/Seita.4G028500/Seita.4G042600/Seita.4G059300/Seita.4G202500/Seita.5G354800/Seita.6G025200/Seita.9G472500	11
darkgrey	sita00190	Oxidative phosphorylation	7/42	152/5494	0.000129217	0.00161521	0.0014962	Seita.2G371000/Seita.3G006000/Seita.6G052100/Seita.6G184900/Seita.6G244800/Seita.9G074400/Seita.9G439000	7
darkolivegreen	sita03450	Non-homologous end-joining	1/1	12/5494	0.0021842	0.0065526	NA	Seita.9G022300	1
darkolivegreen	sita03410	Base excision repair	1/1	42/5494	0.0076447	0.0098289	NA	Seita.9G022300	1
darkolivegreen	sita03030	DNA replication	1/1	54/5494	0.0098289	0.0098289	NA	Seita.9G022300	1
darkorange	sita00260	Glycine, serine and threonine metabolism	4/11	84/5494	1.54696e-05	0.000170166	9.77027e-05	Seita.5G020700/Seita.5G020800/Seita.7G307900/Seita.8G023700	4
darkorange	sita00040	Pentose and glucuronate interconversions	3/11	89/5494	0.000617289	0.00339509	0.00194933	Seita.2G350500/Seita.4G231100/Seita.6G236000	3
darkorange	sita00310	Lysine degradation	2/11	40/5494	0.00272741	0.0100005	0.00574191	Seita.5G020700/Seita.5G020800	2
darkorange	sita04146	Peroxisome	2/11	102/5494	0.0168314	0.0462863	0.0265759	Seita.5G020700/Seita.5G020800	2
darkred	sita00900	Terpenoid backbone biosynthesis	3/16	69/5494	0.000944516	0.0122787	0.00994228	Seita.3G273700/Seita.6G034800/Seita.6G035400	3
greenyellow	sita03030	DNA replication	13/66	54/5494	2.3778e-14	9.03563e-13	8.51001e-13	Seita.1G170500/Seita.1G352100/Seita.1G376600/Seita.3G082800/Seita.3G086800/Seita.3G205800/Seita.3G335500/Seita.5G192100/Seita.7G073600/Seita.7G136600/Seita.7G216400/Seita.8G121500/Seita.9G491000	13
greenyellow	sita03440	Homologous recombination	8/66	68/5494	1.17553e-06	2.23351e-05	2.10359e-05	Seita.1G329800/Seita.1G376600/Seita.2G440900/Seita.3G183600/Seita.5G114900/Seita.7G163500/Seita.8G194500/Seita.9G491000	8
greenyellow	sita03430	Mismatch repair	4/66	40/5494	0.00125458	0.0158914	0.014967	Seita.1G376600/Seita.3G085400/Seita.5G128200/Seita.9G491000	4
grey60	sita00970	Aminoacyl-tRNA biosynthesis	4/30	74/5494	0.000637593	0.0191278	0.0181211	Seita.3G129600/Seita.3G130400/Seita.5G403600/Seita.6G107900	4
midnightblue	sita03008	Ribosome biogenesis in eukaryotes	9/47	99/5494	1.07333e-07	3.54197e-06	3.0505e-06	Seita.3G175900/Seita.4G257300/Seita.6G223100/Seita.7G291600/Seita.7G314400/Seita.7G334600/Seita.9G003700/Seita.9G022600/Seita.9G435300	9
midnightblue	sita03013	RNA transport	8/47	193/5494	0.00019423	0.00320479	0.00276011	Seita.1G229900/Seita.3G001600/Seita.3G264800/Seita.4G257300/Seita.5G466000/Seita.7G334600/Seita.9G003700/Seita.9G156300	8
midnightblue	sita04145	Phagosome	4/47	77/5494	0.00403125	0.0440005	0.0378951	Seita.3G002200/Seita.3G068300/Seita.4G187500/Seita.4G235800	4
midnightblue	sita03410	Base excision repair	3/47	42/5494	0.00533339	0.0440005	0.0378951	Seita.1G192000/Seita.6G045100/Seita.9G212100	3
orange	sita00261	Monobactam biosynthesis	2/20	13/5494	0.000958821	0.0195336	0.0176243	Seita.2G109200/Seita.4G159800	2
orange	sita00300	Lysine biosynthesis	2/20	18/5494	0.00186034	0.0195336	0.0176243	Seita.2G109200/Seita.4G159800	2
pink	sita03040	Spliceosome	32/180	199/5494	1.99914e-14	1.33942e-12	1.22052e-12	Seita.1G005500/Seita.1G063300/Seita.1G090100/Seita.1G136100/Seita.2G153600/Seita.2G179200/Seita.2G326100/Seita.2G361400/Seita.2G411500/Seita.3G152600/Seita.3G240400/Seita.4G058100/Seita.4G113800/Seita.4G237600/Seita.4G238900/Seita.4G257900/Seita.5G197900/Seita.5G225200/Seita.5G243700/Seita.5G423600/Seita.5G427500/Seita.7G057500/Seita.7G240200/Seita.8G239700/Seita.9G121600/Seita.9G215900/Seita.9G3…	32
pink	sita03013	RNA transport	25/180	193/5494	2.25858e-09	7.56624e-08	6.89461e-08	Seita.1G092100/Seita.1G331900/Seita.1G361100/Seita.2G131600/Seita.2G145500/Seita.2G253000/Seita.2G387400/Seita.3G122000/Seita.3G144100/Seita.4G113800/Seita.4G159900/Seita.5G082200/Seita.5G315300/Seita.5G387300/Seita.5G427500/Seita.6G099900/Seita.7G106300/Seita.8G213100/Seita.9G374700/Seita.9G404900/Seita.9G406000/Seita.9G460800/Seita.9G468900/Seita.9G484200/Seita.9G485300	25
pink	sita03015	mRNA surveillance pathway	17/180	120/5494	2.70452e-07	6.0401e-06	5.50394e-06	Seita.1G083500/Seita.2G145500/Seita.2G146700/Seita.2G416900/Seita.2G443400/Seita.4G113800/Seita.4G184000/Seita.5G151700/Seita.5G281700/Seita.6G039800/Seita.6G192400/Seita.7G028600/Seita.7G106300/Seita.8G094800/Seita.9G099800/Seita.9G406000/Seita.9G460800	17
pink	sita03008	Ribosome biogenesis in eukaryotes	14/180	99/5494	3.29012e-06	5.51095e-05	5.02176e-05	Seita.1G305200/Seita.3G132000/Seita.3G384700/Seita.4G006800/Seita.4G201000/Seita.4G267000/Seita.5G407900/Seita.7G187400/Seita.7G244600/Seita.8G022100/Seita.9G051000/Seita.9G409300/Seita.9G414500/Seita.9G537800	14
pink	sita03018	RNA degradation	15/180	119/5494	6.2977e-06	8.43892e-05	7.68983e-05	Seita.1G080100/Seita.1G235700/Seita.2G145500/Seita.2G218100/Seita.4G003400/Seita.5G079500/Seita.5G331500/Seita.7G129800/Seita.8G054400/Seita.9G152800/Seita.9G243800/Seita.9G260900/Seita.9G325500/Seita.9G334700/Seita.9G527700	15
royalblue	sita00460	Cyanoamino acid metabolism	3/17	81/5494	0.00180886	0.027133	0.0247529	Seita.9G010600/Seita.9G010700/Seita.9G011500	3
saddlebrown	sita04075	Plant hormone signal transduction	4/13	267/5494	0.00275226	0.0212118	0.0111641	Seita.2G426000/Seita.5G342900/Seita.7G172500/Seita.7G317200	4
saddlebrown	sita04120	Ubiquitin mediated proteolysis	3/13	157/5494	0.00530294	0.0212118	0.0111641	Seita.2G321100/Seita.5G083600/Seita.5G083800	3
saddlebrown	sita00460	Cyanoamino acid metabolism	2/13	81/5494	0.0150726	0.0401936	0.0211545	Seita.9G386000/Seita.9G386100	2
saddlebrown	sita03008	Ribosome biogenesis in eukaryotes	2/13	99/5494	0.0220324	0.0440648	0.023192	Seita.7G334500/Seita.8G001200	2
skyblue	sita04016	MAPK signaling pathway - plant	4/16	167/5494	0.00112585	0.014636	0.0130361	Seita.1G370200/Seita.2G131900/Seita.7G122200/Seita.7G255900	4
skyblue	sita04075	Plant hormone signal transduction	4/16	267/5494	0.00624254	0.0405765	0.036141	Seita.1G370200/Seita.1G377600/Seita.2G131900/Seita.5G389300	4
steelblue	sita00190	Oxidative phosphorylation	6/21	152/5494	1.56363e-05	0.000250181	0.000213971	Seita.1G292300/Seita.4G278700/Seita.5G214100/Seita.6G246100/Seita.9G305900/Seita.9G402500	6
steelblue	sita03050	Proteasome	3/21	63/5494	0.00164962	0.0131969	0.0112869	Seita.1G060900/Seita.1G221200/Seita.2G272500	3
tan	sita03020	RNA polymerase	5/55	65/5494	0.000437314	0.0174926	0.0165719	Seita.1G007500/Seita.1G113400/Seita.1G114300/Seita.1G114500/Seita.7G078000	5
turquoise	sita00195	Photosynthesis	54/1295	90/5494	1.00776e-13	1.16901e-11	9.86548e-12	Seita.1G003200/Seita.1G016500/Seita.1G126000/Seita.1G126100/Seita.1G208500/Seita.1G217200/Seita.1G321900/Seita.2G030900/Seita.2G031300/Seita.2G097300/Seita.2G117000/Seita.2G248100/Seita.2G330500/Seita.2G356500/Seita.3G149000/Seita.3G184900/Seita.3G225100/Seita.4G174100/Seita.4G174200/Seita.4G207000/Seita.5G172700/Seita.5G336700/Seita.5G395300/Seita.5G446500/Seita.6G005600/Seita.6G005700/Seita.6G0…	54
turquoise	sita00196	Photosynthesis - antenna proteins	15/1295	16/5494	4.52314e-09	2.62342e-07	2.21396e-07	Seita.1G330600/Seita.2G166700/Seita.2G217800/Seita.2G299200/Seita.2G351600/Seita.2G352900/Seita.2G366600/Seita.3G143800/Seita.4G139900/Seita.4G219400/Seita.5G215600/Seita.6G158500/Seita.7G121800/Seita.8G080900/Seita.9G177100	15
turquoise	sita00710	Carbon fixation in photosynthetic organisms	42/1295	83/5494	6.52952e-08	2.52475e-06	2.13069e-06	Seita.1G023500/Seita.1G071600/Seita.1G160800/Seita.1G221800/Seita.1G283800/Seita.2G001500/Seita.2G051000/Seita.2G137100/Seita.2G288000/Seita.2G401000/Seita.3G109300/Seita.3G192600/Seita.3G247900/Seita.3G269600/Seita.3G312000/Seita.3G312400/Seita.4G023400/Seita.4G175200/Seita.4G177400/Seita.4G186100/Seita.4G220100/Seita.5G079400/Seita.5G102500/Seita.5G301800/Seita.5G324500/Seita.5G349200/Seita.5G3…	42
turquoise	sita00860	Porphyrin and chlorophyll metabolism	29/1295	51/5494	2.95553e-07	8.57105e-06	7.23328e-06	Seita.1G073800/Seita.1G109600/Seita.1G134200/Seita.1G195800/Seita.1G318400/Seita.3G195200/Seita.4G022100/Seita.4G271200/Seita.5G010700/Seita.5G033900/Seita.5G040100/Seita.5G184900/Seita.5G231400/Seita.5G236100/Seita.5G460000/Seita.5G461800/Seita.6G144300/Seita.7G152800/Seita.7G217800/Seita.7G232700/Seita.7G290300/Seita.9G041600/Seita.9G078900/Seita.9G152400/Seita.9G249900/Seita.9G266700/Seita.9G4…	29
turquoise	sita00230	Purine metabolism	44/1295	107/5494	3.5916e-05	0.000833251	0.000703197	Seita.1G101500/Seita.1G231800/Seita.2G301700/Seita.2G387600/Seita.2G419900/Seita.3G089800/Seita.3G107700/Seita.3G119100/Seita.3G340300/Seita.3G350200/Seita.3G370600/Seita.4G155700/Seita.4G215100/Seita.5G041600/Seita.5G141100/Seita.5G216600/Seita.5G251700/Seita.5G290800/Seita.5G392500/Seita.6G009100/Seita.6G027400/Seita.6G173100/Seita.6G244900/Seita.7G011800/Seita.7G270900/Seita.8G084700/Seita.9G0…	44
turquoise	sita00630	Glyoxylate and dicarboxylate metabolism	34/1295	78/5494	6.84312e-05	0.001323	0.00111651	Seita.1G001300/Seita.1G117500/Seita.1G177400/Seita.1G198600/Seita.2G001500/Seita.2G034400/Seita.2G389500/Seita.2G401000/Seita.3G010200/Seita.3G024100/Seita.3G033500/Seita.3G269600/Seita.3G305500/Seita.3G312000/Seita.3G312400/Seita.4G148000/Seita.4G286700/Seita.5G158800/Seita.5G207800/Seita.5G329600/Seita.6G202400/Seita.7G008600/Seita.7G008700/Seita.7G144600/Seita.7G148100/Seita.7G242800/Seita.7G2…	34
turquoise	sita00360	Phenylalanine metabolism	23/1295	49/5494	0.000273208	0.00407067	0.00343532	Seita.1G023500/Seita.1G075300/Seita.1G133500/Seita.1G136300/Seita.1G136500/Seita.1G240200/Seita.1G240300/Seita.1G240600/Seita.1G352200/Seita.2G117700/Seita.2G313200/Seita.2G313400/Seita.4G157000/Seita.4G160500/Seita.4G177400/Seita.4G243300/Seita.6G067800/Seita.6G068000/Seita.6G181000/Seita.7G168700/Seita.7G330600/Seita.8G018400/Seita.8G214400	23
turquoise	sita00130	Ubiquinone and other terpenoid-quinone biosynthesis	25/1295	55/5494	0.000280736	0.00407067	0.00343532	Seita.1G065800/Seita.1G075300/Seita.1G123800/Seita.1G136300/Seita.1G136500/Seita.1G211100/Seita.1G283300/Seita.1G287200/Seita.2G365900/Seita.3G188900/Seita.3G287400/Seita.3G392700/Seita.4G157000/Seita.4G160500/Seita.4G190800/Seita.5G253900/Seita.5G342700/Seita.5G361200/Seita.5G416900/Seita.7G160700/Seita.8G214400/Seita.9G133200/Seita.9G184100/Seita.9G245100/Seita.9G510600	25
turquoise	sita00270	Cysteine and methionine metabolism	44/1295	121/5494	0.000939824	0.0121133	0.0102226	Seita.1G004300/Seita.1G004400/Seita.1G014500/Seita.1G023500/Seita.1G136300/Seita.1G136500/Seita.1G229400/Seita.1G336300/Seita.1G352200/Seita.2G059200/Seita.2G210300/Seita.2G210400/Seita.2G225400/Seita.2G227200/Seita.2G401000/Seita.3G035500/Seita.3G050000/Seita.3G053400/Seita.3G206500/Seita.3G348900/Seita.3G382700/Seita.3G383600/Seita.4G075200/Seita.4G157000/Seita.4G160500/Seita.4G177400/Seita.4G1…	44
turquoise	sita00030	Pentose phosphate pathway	25/1295	60/5494	0.00136211	0.0158005	0.0133344	Seita.1G101500/Seita.1G160800/Seita.2G051000/Seita.4G011500/Seita.4G023400/Seita.4G141400/Seita.4G186100/Seita.4G215100/Seita.4G220100/Seita.5G079400/Seita.5G311000/Seita.5G381500/Seita.5G393200/Seita.5G419900/Seita.5G437000/Seita.6G120600/Seita.6G236700/Seita.8G050800/Seita.9G067800/Seita.9G118400/Seita.9G247300/Seita.9G365500/Seita.9G458800/Seita.9G525700/Seita.9G580300	25
turquoise	sita00906	Carotenoid biosynthesis	17/1295	37/5494	0.00226453	0.0238805	0.0201532	Seita.1G288100/Seita.1G367300/Seita.2G042900/Seita.2G077800/Seita.2G104900/Seita.2G229900/Seita.3G304800/Seita.4G288600/Seita.5G258300/Seita.5G315800/Seita.7G067200/Seita.7G116400/Seita.8G101900/Seita.8G158400/Seita.9G156500/Seita.9G336100/Seita.9G515900	17
turquoise	sita00400	Phenylalanine, tyrosine and tryptophan biosynthesis	23/1295	56/5494	0.00261966	0.0248896	0.0210049	Seita.1G023500/Seita.1G062500/Seita.1G136300/Seita.1G136500/Seita.1G320400/Seita.1G352200/Seita.2G109500/Seita.2G194700/Seita.2G290400/Seita.2G394800/Seita.2G443900/Seita.4G023200/Seita.4G157000/Seita.4G160500/Seita.4G177400/Seita.4G275200/Seita.6G163700/Seita.7G129900/Seita.8G214400/Seita.9G028000/Seita.9G379300/Seita.9G444000/Seita.9G466000	23
turquoise	sita00620	Pyruvate metabolism	40/1295	113/5494	0.00278936	0.0248896	0.0210049	Seita.1G004300/Seita.1G004400/Seita.1G125900/Seita.1G177400/Seita.1G247500/Seita.1G307000/Seita.2G137100/Seita.2G201500/Seita.2G268700/Seita.2G401000/Seita.3G081100/Seita.3G109300/Seita.3G219900/Seita.3G247900/Seita.4G117100/Seita.4G117200/Seita.4G175200/Seita.5G041600/Seita.5G158800/Seita.5G251700/Seita.5G301800/Seita.5G324500/Seita.6G036000/Seita.6G225900/Seita.6G251800/Seita.7G030600/Seita.7G1…	40
turquoise	sita00740	Riboflavin metabolism	11/1295	21/5494	0.00389391	0.0322638	0.0272281	Seita.1G159500/Seita.2G301700/Seita.3G216400/Seita.3G343200/Seita.7G153100/Seita.7G195300/Seita.9G051100/Seita.9G230300/Seita.9G475200/Seita.9G475300/Seita.9G566600	11
turquoise	sita00250	Alanine, aspartate and glutamate metabolism	22/1295	55/5494	0.00472551	0.0365439	0.0308401	Seita.1G023500/Seita.1G352200/Seita.2G001500/Seita.3G024100/Seita.3G206500/Seita.3G375200/Seita.4G177400/Seita.5G272500/Seita.6G202400/Seita.7G115400/Seita.7G186100/Seita.7G264800/Seita.8G003700/Seita.9G118300/Seita.9G128100/Seita.9G251100/Seita.9G426200/Seita.9G431200/Seita.9G440900/Seita.9G476700/Seita.9G520800/Seita.9G523300	22
turquoise	sita00350	Tyrosine metabolism	23/1295	59/5494	0.00569465	0.0412862	0.0348423	Seita.1G023500/Seita.1G049000/Seita.1G075300/Seita.1G133500/Seita.1G136300/Seita.1G136500/Seita.1G247500/Seita.1G352200/Seita.2G117700/Seita.3G097200/Seita.4G157000/Seita.4G160500/Seita.4G177400/Seita.4G243300/Seita.6G067800/Seita.6G068000/Seita.7G240500/Seita.7G330600/Seita.8G018400/Seita.8G099000/Seita.8G099100/Seita.8G214400/Seita.9G023800	23
yellow	sita03040	Spliceosome	51/415	199/5494	1.2082e-15	1.19612e-13	1.13189e-13	Seita.1G112500/Seita.1G228900/Seita.1G347000/Seita.1G375000/Seita.3G042400/Seita.3G104100/Seita.3G146200/Seita.3G326000/Seita.3G327900/Seita.3G357800/Seita.3G361000/Seita.4G004800/Seita.4G031600/Seita.4G053100/Seita.4G067300/Seita.4G276200/Seita.4G283500/Seita.4G290500/Seita.4G290900/Seita.5G020500/Seita.5G052100/Seita.5G110500/Seita.5G376100/Seita.5G388200/Seita.5G426900/Seita.5G465000/Seita.6G0…	51
yellow	sita03013	RNA transport	37/415	193/5494	7.49782e-08	3.71142e-06	3.51213e-06	Seita.1G044300/Seita.1G108200/Seita.1G242900/Seita.1G274800/Seita.1G316200/Seita.2G083500/Seita.2G108200/Seita.2G220900/Seita.2G338000/Seita.2G434400/Seita.2G437000/Seita.2G445200/Seita.3G264400/Seita.3G265900/Seita.3G279300/Seita.4G053100/Seita.4G225300/Seita.4G242200/Seita.4G271000/Seita.5G141500/Seita.5G151500/Seita.5G201600/Seita.6G007600/Seita.6G009900/Seita.6G010200/Seita.6G153800/Seita.7G2…	37
yellow	sita04136	Autophagy - other	11/415	42/5494	0.000200364	0.00521397	0.00493401	Seita.1G112300/Seita.3G302800/Seita.4G053000/Seita.4G233200/Seita.6G101600/Seita.7G153000/Seita.7G316700/Seita.7G328900/Seita.8G026300/Seita.8G174500/Seita.9G527100	11
yellow	sita03015	mRNA surveillance pathway	21/415	120/5494	0.000210665	0.00521397	0.00493401	Seita.1G031900/Seita.1G054500/Seita.1G108200/Seita.1G242900/Seita.1G326500/Seita.1G369000/Seita.2G372700/Seita.3G015200/Seita.3G037600/Seita.3G161700/Seita.3G264300/Seita.4G053100/Seita.4G233200/Seita.4G262400/Seita.6G007600/Seita.6G153800/Seita.9G126200/Seita.9G199800/Seita.9G459500/Seita.9G527100/Seita.J001100	21
yellow	sita04141	Protein processing in endoplasmic reticulum	31/415	217/5494	0.000362624	0.00717996	0.00679443	Seita.1G032700/Seita.1G045200/Seita.1G061900/Seita.1G063800/Seita.1G147100/Seita.1G190200/Seita.1G342400/Seita.2G220900/Seita.3G037700/Seita.3G327900/Seita.4G044200/Seita.4G200900/Seita.4G207400/Seita.5G093000/Seita.5G151500/Seita.5G177300/Seita.5G336600/Seita.5G376100/Seita.5G383500/Seita.6G122600/Seita.6G182100/Seita.6G200200/Seita.7G009200/Seita.7G047100/Seita.7G127500/Seita.8G106900/Seita.9G1…	31
