# Supplementary material for: Response of Multiple Tissues to Drought Revealed by a Weighted Gene Co-Expression Network Analysis in Foxtail Millet [Setaria italica (L.) P. Beauv.]
Source: Front Plant Sci. 2022 Jan 12;12:746166. doi: 10.3389/fpls.2021.746166 (PMC8790073; doi:10.3389/fpls.2021.746166)
Supplement: Supplementary Table S14 — Comparisons of drought-responsive genes in leaves between different development stages of Setaria italica. [file Table_14.XLSX]

## Sheet: Supplementary Table S14
Supplementary Table S14: Comparisons of drought responsive genes in leaves between different development stages of Setaria italica
GeneID	Ci134 jointing	Ci328 jointing	Ci409 jointing	Ci603 jointing	Yugu1 seedling (Qi et al., 2013)	Yugu1 seedling (Tang et al., 2017)	An04 seedling (Tang et al., 2017)	Jigu16 seedling (Qin et al., 2020)	Jingu20 germination (Yu et al., 2020)
Differentially expressed at all studied development stages
Seita.3G164700	up	up	up	up	up	up	up	up	up
Seita.4G082000	up	up	up	up	up	up	up	up	up
Seita.4G195200	up	up	up	up	up	up	up	up	up
Seita.5G110600	up	up	up	up	up	up	up	up	up
Seita.5G251200	up	up	up	up	up	up	up	up	up
Seita.5G287800	up	up	up	up	up	up	up	up	up
Seita.6G005300	up	up	up	up	up	up	up	up	up
Seita.7G136800	up	up	up	up	up	up	up	up	up
Seita.8G044000	down	down	down	down	down	down	down	down	down
Seita.9G460200	up	up	up	up	up	up	up	up	up
Only differentiall expressed during jointing stage
Seita.1G005000	up	up	up	up	normal	normal	normal	normal	normal
Seita.1G005400	down	down	down	down	normal	normal	normal	normal	normal
Seita.1G014700	down	down	down	down	normal	normal	normal	normal	normal
Seita.1G028800	down	down	up	up	normal	normal	normal	normal	normal
Seita.1G034900	up	up	up	up	normal	normal	normal	normal	normal
Seita.1G035200	down	down	down	down	normal	normal	normal	normal	normal
Seita.1G060100	down	down	down	down	normal	normal	normal	normal	normal
Seita.1G065200	down	down	down	down	normal	normal	normal	normal	normal
Seita.1G080900	up	up	up	up	normal	normal	normal	normal	normal
Seita.1G127100	up	up	up	up	normal	normal	normal	normal	normal
Seita.1G166700	up	up	up	up	normal	normal	normal	normal	normal
Seita.1G193500	up	up	up	up	normal	normal	normal	normal	normal
Seita.1G203400	down	down	down	down	normal	normal	normal	normal	normal
Seita.1G215900	up	down	up	up	normal	normal	normal	normal	normal
Seita.1G217500	up	up	up	up	normal	normal	normal	normal	normal
Seita.1G256200	up	up	up	up	normal	normal	normal	normal	normal
Seita.1G257800	down	up	up	down	normal	normal	normal	normal	normal
Seita.1G279800	up	up	up	up	normal	normal	normal	normal	normal
Seita.1G316900	up	up	up	up	normal	normal	normal	normal	normal
Seita.1G337500	down	down	down	down	normal	normal	normal	normal	normal
Seita.1G339100	down	down	down	down	normal	normal	normal	normal	normal
Seita.1G347700	down	down	down	down	normal	normal	normal	normal	normal
Seita.2G003500	down	down	down	down	normal	normal	normal	normal	normal
Seita.2G037200	down	down	down	down	normal	normal	normal	normal	normal
Seita.2G053400	up	up	up	down	normal	normal	normal	normal	normal
Seita.2G053800	up	up	up	down	normal	normal	normal	normal	normal
Seita.2G066600	down	down	down	down	normal	normal	normal	normal	normal
Seita.2G078100	down	down	down	down	normal	normal	normal	normal	normal
Seita.2G092300	up	up	up	up	normal	normal	normal	normal	normal
Seita.2G094800	down	down	down	down	normal	normal	normal	normal	normal
Seita.2G119000	up	up	up	up	normal	normal	normal	normal	normal
Seita.2G134000	down	down	down	down	normal	normal	normal	normal	normal
Seita.2G146000	down	down	down	down	normal	normal	normal	normal	normal
Seita.2G147100	down	down	down	down	normal	normal	normal	normal	normal
Seita.2G157500	down	down	down	down	normal	normal	normal	normal	normal
Seita.2G188200	down	down	down	down	normal	normal	normal	normal	normal
Seita.2G199500	up	up	up	up	normal	normal	normal	normal	normal
Seita.2G216800	down	down	down	down	normal	normal	normal	normal	normal
Seita.2G218700	up	up	up	up	normal	normal	normal	normal	normal
Seita.2G229100	down	down	down	down	normal	normal	normal	normal	normal
Seita.2G236000	up	up	up	up	normal	normal	normal	normal	normal
Seita.2G258900	up	up	up	up	normal	normal	normal	normal	normal
Seita.2G265500	down	down	down	down	normal	normal	normal	normal	normal
Seita.2G266800	up	up	up	up	normal	normal	normal	normal	normal
Seita.2G275500	down	down	down	down	normal	normal	normal	normal	normal
Seita.2G276500	down	down	down	down	normal	normal	normal	normal	normal
Seita.2G282600	down	down	down	down	normal	normal	normal	normal	normal
Seita.2G284000	up	up	up	up	normal	normal	normal	normal	normal
Seita.2G290300	up	up	up	up	normal	normal	normal	normal	normal
Seita.2G299900	down	down	down	down	normal	normal	normal	normal	normal
Seita.2G312300	down	down	down	down	normal	normal	normal	normal	normal
Seita.2G313800	down	down	down	down	normal	normal	normal	normal	normal
Seita.2G330500	down	down	down	down	normal	normal	normal	normal	normal
Seita.2G356500	down	down	down	down	normal	normal	normal	normal	normal
Seita.2G367800	down	down	down	down	normal	normal	normal	normal	normal
Seita.2G373600	up	up	up	up	normal	normal	normal	normal	normal
Seita.2G381600	up	up	up	up	normal	normal	normal	normal	normal
Seita.2G381700	up	up	up	up	normal	normal	normal	normal	normal
Seita.2G391600	up	down	down	up	normal	normal	normal	normal	normal
Seita.2G397700	up	up	up	up	normal	normal	normal	normal	normal
Seita.2G422000	down	down	down	down	normal	normal	normal	normal	normal
Seita.2G441700	down	down	down	down	normal	normal	normal	normal	normal
Seita.3G040300	down	down	down	down	normal	normal	normal	normal	normal
Seita.3G056400	down	down	down	down	normal	normal	normal	normal	normal
Seita.3G077100	up	up	up	up	normal	normal	normal	normal	normal
Seita.3G079000	down	down	down	down	normal	normal	normal	normal	normal
Seita.3G084000	up	up	up	up	normal	normal	normal	normal	normal
Seita.3G097400	down	down	down	down	normal	normal	normal	normal	normal
Seita.3G114000	down	down	down	down	normal	normal	normal	normal	normal
Seita.3G144000	up	up	up	up	normal	normal	normal	normal	normal
Seita.3G168400	down	down	down	down	normal	normal	normal	normal	normal
Seita.3G184400	down	down	down	down	normal	normal	normal	normal	normal
Seita.3G217800	up	up	up	up	normal	normal	normal	normal	normal
Seita.3G279400	down	down	down	down	normal	normal	normal	normal	normal
Seita.3G283100	down	down	down	down	normal	normal	normal	normal	normal
Seita.3G298100	up	up	up	up	normal	normal	normal	normal	normal
Seita.3G324600	down	down	down	down	normal	normal	normal	normal	normal
Seita.3G327200	down	down	down	down	normal	normal	normal	normal	normal
Seita.3G357100	down	down	down	down	normal	normal	normal	normal	normal
Seita.3G370000	down	down	down	down	normal	normal	normal	normal	normal
Seita.3G373000	up	up	up	up	normal	normal	normal	normal	normal
Seita.3G373100	up	up	up	up	normal	normal	normal	normal	normal
Seita.3G390000	up	up	up	up	normal	normal	normal	normal	normal
Seita.4G019500	down	down	down	down	normal	normal	normal	normal	normal
Seita.4G088600	up	up	up	up	normal	normal	normal	normal	normal
Seita.4G191600	down	down	down	down	normal	normal	normal	normal	normal
Seita.4G199500	down	down	down	down	normal	normal	normal	normal	normal
Seita.4G218900	down	down	down	down	normal	normal	normal	normal	normal
Seita.4G231500	down	down	down	down	normal	normal	normal	normal	normal
Seita.4G242700	up	up	up	up	normal	normal	normal	normal	normal
Seita.4G260000	up	up	up	up	normal	normal	normal	normal	normal
Seita.4G281800	down	down	down	down	normal	normal	normal	normal	normal
Seita.4G288300	up	up	up	up	normal	normal	normal	normal	normal
Seita.4G289300	up	up	up	up	normal	normal	normal	normal	normal
Seita.5G025400	down	down	down	down	normal	normal	normal	normal	normal
Seita.5G040800	up	up	up	up	normal	normal	normal	normal	normal
Seita.5G056800	down	down	down	down	normal	normal	normal	normal	normal
Seita.5G063900	down	down	down	down	normal	normal	normal	normal	normal
Seita.5G071000	up	up	up	up	normal	normal	normal	normal	normal
Seita.5G073900	up	up	up	up	normal	normal	normal	normal	normal
Seita.5G112900	up	up	up	up	normal	normal	normal	normal	normal
Seita.5G121000	down	down	down	down	normal	normal	normal	normal	normal
Seita.5G148800	up	up	up	up	normal	normal	normal	normal	normal
Seita.5G150600	down	down	down	down	normal	normal	normal	normal	normal
Seita.5G157800	down	down	down	down	normal	normal	normal	normal	normal
Seita.5G183600	down	down	down	down	normal	normal	normal	normal	normal
Seita.5G183700	down	down	down	down	normal	normal	normal	normal	normal
Seita.5G187800	down	down	down	down	normal	normal	normal	normal	normal
Seita.5G200400	up	up	up	up	normal	normal	normal	normal	normal
Seita.5G202100	up	up	up	up	normal	normal	normal	normal	normal
Seita.5G229900	down	down	down	down	normal	normal	normal	normal	normal
Seita.5G250500	up	up	up	up	normal	normal	normal	normal	normal
Seita.5G271200	down	down	down	down	normal	normal	normal	normal	normal
Seita.5G286300	up	up	up	up	normal	normal	normal	normal	normal
Seita.5G375200	down	down	down	down	normal	normal	normal	normal	normal
Seita.5G377800	up	up	up	up	normal	normal	normal	normal	normal
Seita.5G407700	down	down	down	down	normal	normal	normal	normal	normal
Seita.5G417700	down	down	down	down	normal	normal	normal	normal	normal
Seita.5G448100	up	up	up	up	normal	normal	normal	normal	normal
Seita.5G448900	up	up	up	up	normal	normal	normal	normal	normal
Seita.6G002400	down	down	down	down	normal	normal	normal	normal	normal
Seita.6G032200	down	down	down	down	normal	normal	normal	normal	normal
Seita.6G098200	down	down	down	down	normal	normal	normal	normal	normal
Seita.6G105500	up	up	up	up	normal	normal	normal	normal	normal
Seita.6G105600	up	up	up	up	normal	normal	normal	normal	normal
Seita.6G151500	up	down	down	up	normal	normal	normal	normal	normal
Seita.6G193100	up	up	up	up	normal	normal	normal	normal	normal
Seita.6G208200	up	up	up	up	normal	normal	normal	normal	normal
Seita.6G249100	up	up	up	up	normal	normal	normal	normal	normal
Seita.7G007600	down	down	down	down	normal	normal	normal	normal	normal
Seita.7G015900	up	up	up	up	normal	normal	normal	normal	normal
Seita.7G033300	up	up	up	up	normal	normal	normal	normal	normal
Seita.7G084000	down	down	down	down	normal	normal	normal	normal	normal
Seita.7G105600	up	up	up	up	normal	normal	normal	normal	normal
Seita.7G121600	up	up	up	up	normal	normal	normal	normal	normal
Seita.7G135400	down	down	down	down	normal	normal	normal	normal	normal
Seita.7G149200	down	down	down	down	normal	normal	normal	normal	normal
Seita.7G151700	up	up	up	up	normal	normal	normal	normal	normal
Seita.7G163400	up	up	up	up	normal	normal	normal	normal	normal
Seita.7G168700	up	up	up	up	normal	normal	normal	normal	normal
Seita.7G187900	down	down	down	down	normal	normal	normal	normal	normal
Seita.7G199600	up	up	up	up	normal	normal	normal	normal	normal
Seita.7G212200	down	up	up	down	normal	normal	normal	normal	normal
Seita.7G223800	up	up	up	up	normal	normal	normal	normal	normal
Seita.7G224700	up	up	up	up	normal	normal	normal	normal	normal
Seita.7G226000	down	down	down	down	normal	normal	normal	normal	normal
Seita.7G247100	up	up	up	up	normal	normal	normal	normal	normal
Seita.7G252300	down	down	down	down	normal	normal	normal	normal	normal
Seita.7G265800	up	up	up	up	normal	normal	normal	normal	normal
Seita.7G301200	down	down	down	down	normal	normal	normal	normal	normal
Seita.8G005500	up	up	up	up	normal	normal	normal	normal	normal
Seita.8G005700	up	up	up	up	normal	normal	normal	normal	normal
Seita.8G051400	down	down	down	down	normal	normal	normal	normal	normal
Seita.8G057700	up	up	up	up	normal	normal	normal	normal	normal
Seita.8G058200	up	up	up	up	normal	normal	normal	normal	normal
Seita.8G099200	up	up	up	up	normal	normal	normal	normal	normal
Seita.8G248500	down	down	down	down	normal	normal	normal	normal	normal
Seita.9G002400	up	up	up	up	normal	normal	normal	normal	normal
Seita.9G012400	up	up	up	up	normal	normal	normal	normal	normal
Seita.9G043000	up	up	up	up	normal	normal	normal	normal	normal
Seita.9G048800	up	up	up	up	normal	normal	normal	normal	normal
Seita.9G055800	down	down	down	down	normal	normal	normal	normal	normal
Seita.9G067500	down	down	down	down	normal	normal	normal	normal	normal
Seita.9G071200	down	down	down	down	normal	normal	normal	normal	normal
Seita.9G138400	down	down	down	down	normal	normal	normal	normal	normal
Seita.9G159300	up	up	up	up	normal	normal	normal	normal	normal
Seita.9G167400	down	down	down	down	normal	normal	normal	normal	normal
Seita.9G182400	down	down	down	down	normal	normal	normal	normal	normal
Seita.9G185500	up	up	up	up	normal	normal	normal	normal	normal
Seita.9G208500	up	up	up	up	normal	normal	normal	normal	normal
Seita.9G256600	down	down	down	down	normal	normal	normal	normal	normal
Seita.9G317300	up	up	up	up	normal	normal	normal	normal	normal
Seita.9G319600	down	down	down	down	normal	normal	normal	normal	normal
Seita.9G327600	up	up	up	up	normal	normal	normal	normal	normal
Seita.9G331700	up	up	up	up	normal	normal	normal	normal	normal
Seita.9G358700	up	up	up	up	normal	normal	normal	normal	normal
Seita.9G370000	up	up	up	up	normal	normal	normal	normal	normal
Seita.9G373600	down	down	down	down	normal	normal	normal	normal	normal
Seita.9G380000	up	up	up	up	normal	normal	normal	normal	normal
Seita.9G381700	up	up	up	up	normal	normal	normal	normal	normal
Seita.9G381800	up	up	up	up	normal	normal	normal	normal	normal
Seita.9G388700	down	down	down	down	normal	normal	normal	normal	normal
Seita.9G406800	down	down	down	down	normal	normal	normal	normal	normal
Seita.9G436800	up	up	up	up	normal	normal	normal	normal	normal
Seita.9G440600	up	up	up	up	normal	normal	normal	normal	normal
Seita.9G460100	up	up	up	up	normal	normal	normal	normal	normal
Seita.9G465100	up	up	up	up	normal	normal	normal	normal	normal
Seita.9G471900	down	down	down	down	normal	normal	normal	normal	normal
Seita.9G494900	down	down	down	down	normal	normal	normal	normal	normal
Seita.9G497900	down	down	down	down	normal	normal	normal	normal	normal
Seita.9G572300	down	down	down	down	normal	normal	normal	normal	normal
Seita.J029800	down	down	down	down	normal	normal	normal	normal	normal
Seita.J030100	down	down	down	down	normal	normal	normal	normal	normal
