# Supplementary material for: Response of Multiple Tissues to Drought Revealed by a Weighted Gene Co-Expression Network Analysis in Foxtail Millet [Setaria italica (L.) P. Beauv.]
Source: Front Plant Sci. 2022 Jan 12;12:746166. doi: 10.3389/fpls.2021.746166 (PMC8790073; doi:10.3389/fpls.2021.746166)
Supplement: Supplementary Table S15 — Validation of DEGs by qRT-PCR in this study. [file Table_15.XLSX]

## Sheet: Supplementary Table S15
Supplementary Table S15: Validation of DEGs by qRT-PCR in this study
GeneID	Description	Primers Used for qRT-PCR	Tissue	Ci134 Drought Vs. Normal qRT-PCR(-ΔΔCT)	Ci603 Drought Vs. Normal qRT-PCR(-ΔΔCT)	Ci328 Drought Vs. Normal qRT-PCR(-ΔΔCT)	Ci409 Drought Vs. Normal qRT-PCR(-ΔΔCT)	Ci134 Drought Vs. Normal RNA-seq(log2FC)	Ci603 Drought Vs. Normal RNA-seq(log2FC)	Ci328 Drought Vs. Normal RNA-seq(log2FC)	Ci409 Drought Vs. Normal RNA-seq(log2FC)
Seita.1G253100	PF00643 - B-box zinc finger (zf-B_box) (1 of 19)	5'-GGCCTAGGAGTAGTAAGGACTA; 5'-TTTCCTTCGCTTCGCTTGATC	Leaf	-1.99±0.3	-0.3±3.56	-2.34±1.05	-2.45±0.32	-0.46245	0.02074	-1.01984	-0.82703
Seita.4G289300	1.3.1.72 - Delta(24)-sterol reductase / Lanosterol Delta(24)-reductase (1 of 2)	5'-GGTTGCATCGGTGATTCGGA; 5'-TGAGCCGCTTCACAACCTTC	Leaf	2.13±0.82	1.15±1.35	-0.16±0.27	-0.19±0.15	0.82358	0.95145	0.3836	0.6358
Seita.3G109300	PTHR23406//PTHR23406:SF11 - MALIC ENZYME-RELATED // SUBFAMILY NOT NAMED (1 of 2)	5'-CGCATCCTTCCATCTGTA; 5'-CCATCTCCGACGACATAT	Leaf	2.81±0.02	0.67±0.11	1.44±0.69	1.59±0.47	0.95829	0.31815	0.9285	0.61327
Seita.9G021900	K19355 - mannan endo-1,4-beta-mannosidase (MAN) (1 of 8)	5'-TCGGGTAGGAGTAGCAGTAGT; 5'-TTGTCGGGACAAGTATGTTCTAAC	Leaf	6.03±0.21	4.67±0.06	1.25±1.35	3.57±0.3	2.25158	1.75459	1.58576	1.96403
Seita.4G016400	PF00847 - AP2 domain (AP2) (1 of 194)	5'-GCCGTTCTTCCTTTTGGGGT; 5'-CAACATTGAGGGTGTGCCGA	Leaf	9.05±0.004	1.93±0.78	3.12±0.63	1.84±0.3	4.46413	3.11511	4.40193	2.47924
Seita.3G264300	PTHR10113//PTHR10113:SF11 - PEPTIDE CHAIN RELEASE FACTOR SUBUNIT 1 // SUBFAMILY NOT NAMED (1 of 1)	5'-CCAGGAAGGTTCTCAGTT; 5'-TTCGGTTGATTGCTATTCG	Leaf	2.38±0.61	6.5±0.48	1.42±0.12	1.29±0.19	1.81074	2.4996	1.92359	1.98425
Seita.6G161100	ZF-HD protein dimerisation region (ZF-HD_dimer) (1 of 16)	5'-CACGCTGACTTCAACATCAAC; 5'-CGACCGATTAGCACTAAGTCTT	Leaf	-0.07±0.25	0.74±0.36	-0.91±0.69	-1.86±0.64	-0.26115	0.13151	-0.50819	-0.27981
Seita.8G115400	Dehydrin (Dehydrin)	5'-GCGGCAGCCTATAAATGGT; 5'-GTACCGTACCCAGTCCC	Leaf	1.86±0.04	2.81±0.07	2.05±0.22	0.15±0.07	1.61329	1.91745	1.26275	0.80672
Seita.9G429800	1.3.1.72 - Delta(24)-sterol reductase / Lanosterol Delta(24)-reductase (1 of 2)	5'-CTGCAGGTGCACAAGACCAT; 5'-CTTGAGCCGCTTCACAACCT	Leaf	2.35±1.52	1.71±0.92	1.06±0.66	1.02±0.64	0.50309	0.51416	0.42772	0.38107
Seita.2G081000	K06617 - raffinose synthase (E2.4.1.82) (1 of 6)	5'-TCAGCGGGCAGAGACGAT; 5'-CACAGGGTACAAGAACACAGCATAC	Stem	5.54±0.03	3.08±0.06	2.78±0.06	3.59±0.04	4.14566	1.80235	4.77293	3.37279
Seita.3G264300	PTHR10113//PTHR10113:SF11 - PEPTIDE CHAIN RELEASE FACTOR SUBUNIT 1 // SUBFAMILY NOT NAMED (1 of 1)	5'-CCAGGAAGGTTCTCAGTT; 5'-TTCGGTTGATTGCTATTCG	Stem	4.53±0.02	4.41±0.09	2.89±0.15	3.39±0.02	4.98207	5.39424	4.56909	4.09979
Seita.5G468100	PF00249 - Myb-like DNA-binding domain (Myb_DNA-binding) (1 of 247)	5'-TACCACCACGCCGACAAATAA; 5'-GATTGATTGATCGATCGACCAC	Stem	-0.58±0.02	0.45±0.2	-3.46±0.04	-3.08±0.03	0.70935	2.81872	-1.19114	-1.76271
Seita.8G036300	PTHR22952:SF208 - BZIP TRANSCRIPTION FACTOR-LIKE PROTEIN (1 of 2)	5'-GCATTGACACACTAATGACAGG; 5'-ATCAGATCGATCCAATGGAGTC	Stem	1.22±0.11	0.51±0.24	-0.36±0.17	0.33±0.1	2.8193	3.0232	0.27203	0.27915
Seita.4G082000	PTHR22952//PTHR22952:SF161 - CAMP-RESPONSE ELEMENT BINDING PROTEIN-RELATED // SUBFAMILY NOT NAMED (1 of 1)	5'-CTCGATCTACTCGCTCACGTTC; 5'-TCCATGTTCATGGACCCAAAG	Root	1.48±0.45	5.88±0.52	1.74±0.39	7.18±0.21	2.33123	4.58372	2.81018	4.31827
Seita.5G251200	PTHR22952//PTHR22952:SF156 - CAMP-RESPONSE ELEMENT BINDING PROTEIN-RELATED // SUBFAMILY NOT NAMED (1 of 2)	5'-GAAGCAGTCAAATAGGGAGTCT; 5'-GTAGCTCTACTTTCCTAGCCAG	Root	1.06±0.27	1.48±0.11	1.4±0.05	1.93±0.04	2.35667	3.25962	2.09662	3.12338
Seita.6G114000	Late embryogenesis abundant (LEA) group 1 (LEA_1	5'-CGAGTAAAGAGCCGAGTAGAAT; 5'-TGCTTGCTCTTTCTCGATCTTA	Root	1.24±0.05	3.81±0.23	3.05±0.29	0.93±0.05	3.26831	5.49114	6.41947	4.6222
Seita.2G156100	EREBP-like factor (EREBP)	5'-GAGGACTACCGCAAGTACC; 5'-TCGTTGGGGAAGTTAAGGATAG	Root	-3.31±0.7	-2.77±1.85	-2.39±0.24	-2.74±2.37	-4.95553	-2.70329	-2.82735	-1.11108
Seita.8G036300	PTHR22952:SF208 - BZIP TRANSCRIPTION FACTOR-LIKE PROTEIN (1 of 2)	5'-GCATTGACACACTAATGACAGG; 5'-ATCAGATCGATCCAATGGAGTC	Root	3.91±0.09	1.35±0.07	5.42±0.3	4.73±0.35	4.22153	4.47829	6.17426	5.75135
Seita.9G095900	PTHR10015//PTHR10015:SF190 - HEAT SHOCK TRANSCRIPTION FACTOR // SUBFAMILY NOT NAMED (1 of 1)	5'-GAAGTGAAAGTTCCAGAACGTT; 5'-CAGTTGGGCGTAGGATAAACTA	Root	-5.5±1.48	-1.91±0.34	1.74±0.59	2.99±0.37	-2.67871	-6.2047	1.31547	3.10485
Seita.3G037700	cullin 1 (CUL1, CDC53)	5'-GCCTCTAGGGTTTCCCGTCT; 5'-CACCTCTGCACTAGCTCCCT	ref (stem and leaf)	--	--	--	--	--	--	--	--
Seita.3G264900	elongation factor 1-alpha (EEF1A)	5'-TGACTGTGCTGTCCTCATCA; 5'-GTTGCAGCAGCAAATCATCT	ref (root, stem and leaf)	--	--	--	--	--	--	--	--
Seita.7G016800	succinate dehydrogenase (ubiquinone) cytochrome b560 subunit (SDHC, SDH3)	5'-AGAGGCGAAGAAGTGTATCCC; 5'-AGATGCTCCATTTGCTGTCC	ref (root)	--	--	--	--	--	--	--	--
